# Supplementary material
Source: HighWire-hosted journal article supplement (http://molpharm.aspetjournals.org/highwire/filestream/88281/field_highwire_adjunct_files/0/601_supp_pdb.pdf)
Supplement: 601_supp_pdb.pdf [file 601_supp_pdb.pdf]

HEADER SIGNALING PROTEIN 20-NOV-20 7DJI  
TITLE CRYSTAL STRUCTURE OF LYMNAEA STAGNALIS ACETYLCHOLINE BINDING PROTEIN  
TITLE 2 (ACHBP) COMPLEXED WITH PARAHERQUAMIDE A  
COMPND MOL\_ID: 1;  
COMPND 2 MOLECULE: ACETYLCHOLINE-BINDING PROTEIN;  
COMPND 3 CHAIN: A, B, C, D, E;  
COMPND 4 SYNONYM: ACHBP;  
COMPND 5 ENGINEERED: YES  
SOURCE MOL\_ID: 1;  
SOURCE 2 ORGANISM\_SCIENTIFIC: LYMNAEA STAGNALIS;  
SOURCE 3 ORGANISM\_COMMON: GREAT POND SNAIL;  
SOURCE 4 ORGANISM\_TAXID: 6523;  
SOURCE 5 EXPRESSION\_SYSTEM: KOMAGATAELLA PASTORIS;  
SOURCE 6 EXPRESSION\_SYSTEM\_TAXID: 4922;  
SOURCE 7 EXPRESSION\_SYSTEM\_STRAIN: X-33;  
SOURCE 8 EXPRESSION\_SYSTEM\_PLASMID: PPICZ ALPHA  
KEYWDS PARAHERQUAMIDE A, ACETYLCHOLINE BINDING PROTEIN, NICOTINIC  
KEYWDS 2 ACETYLCHOLINE RECEPTOR, SIGNALING PROTEIN  
EXPDTA X-RAY DIFFRACTION  
AUTHOR M.IHARA,K.MATSUDA  
REVDAT 1 24-NOV-21 7DJI 0  
JRNL AUTH M.IHARA,W.KOIZUMI,K.MATSUDA  
JRNL TITL CRYSTAL STRUCTURE REVEALED MOLECULAR RECOGNITIONS OF  
JRNL TITL 2 PARAHERQUAMIDE A BY NEMATODE NICOTINIC ACETYLCHOLINE  
JRNL TITL 3 RECEPTORS.  
JRNL REF TO BE PUBLISHED  
JRNL REFN  
REMARK 2  
REMARK 2 RESOLUTION. 2.20 ANGSTROMS.  
REMARK 3  
REMARK 3 REFINEMENT.  
REMARK 3 PROGRAM : REFMAC 5.8.0267  
REMARK 3 AUTHORS : MURSHUDOV,SKUBAK,LEBEDEV,PANNU,STEINER,  
REMARK 3 : NICHOLLS,WINN,LONG,VAGIN  
REMARK 3  
REMARK 3 REFINEMENT TARGET : NULL  
REMARK 3  
REMARK 3 DATA USED IN REFINEMENT.  
REMARK 3 RESOLUTION RANGE HIGH (ANGSTROMS) : 2.20  
REMARK 3 RESOLUTION RANGE LOW (ANGSTROMS) : 47.37  
REMARK 3 DATA CUTOFF (SIGMA(F)) : NULL  
REMARK 3 COMPLETENESS FOR RANGE (%) : 99.9  
REMARK 3 NUMBER OF REFLECTIONS : 55135  
REMARK 3  
REMARK 3 FIT TO DATA USED IN REFINEMENT.  
REMARK 3 CROSS-VALIDATION METHOD : FREE R-VALUE  
REMARK 3 FREE R VALUE TEST SET SELECTION : NULL  
REMARK 3 R VALUE (WORKING + TEST SET) : NULL  
REMARK 3 R VALUE (WORKING SET) : 0.185  
REMARK 3 FREE R VALUE : 0.231  
REMARK 3 FREE R VALUE TEST SET SIZE (%) : 4.959  
REMARK 3 FREE R VALUE TEST SET COUNT : 2734  
REMARK 3

REMARK 3 FIT IN THE HIGHEST RESOLUTION BIN.  
 REMARK 3 TOTAL NUMBER OF BINS USED : 20  
 REMARK 3 BIN RESOLUTION RANGE HIGH (A) : 2.20  
 REMARK 3 BIN RESOLUTION RANGE LOW (A) : 2.26  
 REMARK 3 REFLECTION IN BIN (WORKING SET) : 3906  
 REMARK 3 BIN COMPLETENESS (WORKING+TEST) (%) : 99.98  
 REMARK 3 BIN R VALUE (WORKING SET) : 0.2680  
 REMARK 3 BIN FREE R VALUE SET COUNT : 196  
 REMARK 3 BIN FREE R VALUE : 0.2950  
 REMARK 3  
 REMARK 3 NUMBER OF NON-HYDROGEN ATOMS USED IN REFINEMENT.  
 REMARK 3 PROTEIN ATOMS : 8176  
 REMARK 3 NUCLEIC ACID ATOMS : 0  
 REMARK 3 HETEROGEN ATOMS : 250  
 REMARK 3 SOLVENT ATOMS : 486  
 REMARK 3  
 REMARK 3 B VALUES.  
 REMARK 3 FROM WILSON PLOT (A\*\*2) : NULL  
 REMARK 3 MEAN B VALUE (OVERALL, A\*\*2) : 49.02  
 REMARK 3 OVERALL ANISOTROPIC B VALUE.  
 REMARK 3 B11 (A\*\*2) : 0.56500  
 REMARK 3 B22 (A\*\*2) : 0.56500  
 REMARK 3 B33 (A\*\*2) : -1.83200  
 REMARK 3 B12 (A\*\*2) : 0.28200  
 REMARK 3 B13 (A\*\*2) : 0.00000  
 REMARK 3 B23 (A\*\*2) : 0.00000  
 REMARK 3  
 REMARK 3 ESTIMATED OVERALL COORDINATE ERROR.  
 REMARK 3 ESU BASED ON R VALUE (A) : 0.303  
 REMARK 3 ESU BASED ON FREE R VALUE (A) : 0.214  
 REMARK 3 ESU BASED ON MAXIMUM LIKELIHOOD (A) : 0.177  
 REMARK 3 ESU FOR B VALUES BASED ON MAXIMUM LIKELIHOOD (A\*\*2) : 13.842  
 REMARK 3  
 REMARK 3 CORRELATION COEFFICIENTS.  
 REMARK 3 CORRELATION COEFFICIENT FO-FC : 0.962  
 REMARK 3 CORRELATION COEFFICIENT FO-FC FREE : 0.937  
 REMARK 3  
 REMARK 3 RMS DEVIATIONS FROM IDEAL VALUES COUNT RMS WEIGHT  
 REMARK 3 BOND LENGTHS REFINED ATOMS (A) : 8678 ; 0.005 ; 0.013  
 REMARK 3 BOND LENGTHS OTHERS (A) : 7894 ; 0.002 ; 0.018  
 REMARK 3 BOND ANGLES REFINED ATOMS (DEGREES) : 11948 ; 1.413 ; 1.696  
 REMARK 3 BOND ANGLES OTHERS (DEGREES) : 18169 ; 1.150 ; 1.625  
 REMARK 3 TORSION ANGLES, PERIOD 1 (DEGREES) : 1027 ; 7.481 ; 5.000  
 REMARK 3 TORSION ANGLES, PERIOD 2 (DEGREES) : 478 ; 32.391 ; 22.029  
 REMARK 3 TORSION ANGLES, PERIOD 3 (DEGREES) : 1382 ; 14.299 ; 15.000  
 REMARK 3 TORSION ANGLES, PERIOD 4 (DEGREES) : 69 ; 16.604 ; 15.000  
 REMARK 3 CHIRAL-CENTER RESTRAINTS (A\*\*3) : 1194 ; 0.048 ; 0.200  
 REMARK 3 GENERAL PLANES REFINED ATOMS (A) : 9683 ; 0.004 ; 0.020  
 REMARK 3 GENERAL PLANES OTHERS (A) : 1984 ; 0.001 ; 0.020  
 REMARK 3 NON-BONDED CONTACTS REFINED ATOMS (A) : 1260 ; 0.169 ; 0.200  
 REMARK 3 NON-BONDED CONTACTS OTHERS (A) : 77 ; 0.159 ; 0.200  
 REMARK 3 NON-BONDED TORSION REFINED ATOMS (A) : 4109 ; 0.158 ; 0.200  
 REMARK 3 NON-BONDED TORSION OTHERS (A) : NULL ; NULL ; NULL  
 REMARK 3 H-BOND (X...Y) REFINED ATOMS (A) : 514 ; 0.128 ; 0.200

REMARK 3 H-BOND (X...Y) OTHERS (A): NULL ; NULL ; NULL  
 REMARK 3 POTENTIAL METAL-ION REFINED ATOMS (A): NULL ; NULL ; NULL  
 REMARK 3 POTENTIAL METAL-ION OTHERS (A): NULL ; NULL ; NULL  
 REMARK 3 SYMMETRY VDW REFINED ATOMS (A): NULL ; NULL ; NULL  
 REMARK 3 SYMMETRY VDW OTHERS (A): NULL ; NULL ; NULL  
 REMARK 3 SYMMETRY H-BOND REFINED ATOMS (A): NULL ; NULL ; NULL  
 REMARK 3 SYMMETRY H-BOND OTHERS (A): NULL ; NULL ; NULL  
 REMARK 3 SYMMETRY METAL-ION REFINED ATOMS (A): NULL ; NULL ; NULL  
 REMARK 3 SYMMETRY METAL-ION OTHERS (A): NULL ; NULL ; NULL  
 REMARK 3  
 REMARK 3 ISOTROPIC THERMAL FACTOR RESTRAINTS. COUNT RMS WEIGHT  
 REMARK 3 MAIN-CHAIN BOND REFINED ATOMS (A\*\*2): 4105 ; 0.872 ; 3.116  
 REMARK 3 MAIN-CHAIN BOND OTHER ATOMS (A\*\*2): 4103 ; 0.872 ; 3.116  
 REMARK 3 MAIN-CHAIN ANGLE REFINED ATOMS (A\*\*2): 5124 ; 1.571 ; 4.670  
 REMARK 3 MAIN-CHAIN ANGLE OTHER ATOMS (A\*\*2): 5124 ; 1.571 ; 4.670  
 REMARK 3 SIDE-CHAIN BOND REFINED ATOMS (A\*\*2): 4573 ; 0.707 ; 3.209  
 REMARK 3 SIDE-CHAIN BOND OTHER ATOMS (A\*\*2): 4573 ; 0.707 ; 3.209  
 REMARK 3 SIDE-CHAIN ANGLE REFINED ATOMS (A\*\*2): 6821 ; 1.254 ; 4.773  
 REMARK 3 SIDE-CHAIN ANGLE OTHER ATOMS (A\*\*2): 6822 ; 1.254 ; 4.773  
 REMARK 3 LONG RANGE B REFINED ATOMS (A\*\*2): NULL ; NULL ; NULL  
 REMARK 3 LONG RANGE B OTHER ATOMS (A\*\*2): NULL ; NULL ; NULL  
 REMARK 3  
 REMARK 3 ANISOTROPIC THERMAL FACTOR RESTRAINTS. COUNT RMS WEIGHT  
 REMARK 3 RIGID-BOND RESTRAINTS (A\*\*2): NULL ; NULL ; NULL  
 REMARK 3 SPHERICITY; FREE ATOMS (A\*\*2): NULL ; NULL ; NULL  
 REMARK 3 SPHERICITY; BONDED ATOMS (A\*\*2): NULL ; NULL ; NULL  
 REMARK 3  
 REMARK 3 NCS RESTRAINTS STATISTICS  
 REMARK 3 NUMBER OF DIFFERENT NCS GROUPS : NULL  
 REMARK 3  
 REMARK 3 TLS DETAILS  
 REMARK 3 NUMBER OF TLS GROUPS : 5  
 REMARK 3  
 REMARK 3 TLS GROUP : 1  
 REMARK 3 NUMBER OF COMPONENTS GROUP : 2  
 REMARK 3 COMPONENTS C SSSEQI TO C SSSEQI  
 REMARK 3 RESIDUE RANGE : A 1 A 205  
 REMARK 3 RESIDUE RANGE : A 401 A 401  
 REMARK 3 ORIGIN FOR THE GROUP (A): -35.1483 -22.4525 17.8855  
 REMARK 3 T TENSOR  
 REMARK 3 T11: 0.1677 T22: 0.0818  
 REMARK 3 T33: 0.1039 T12: 0.0061  
 REMARK 3 T13: 0.0758 T23: 0.0133  
 REMARK 3 L TENSOR  
 REMARK 3 L11: 1.3214 L22: 0.9250  
 REMARK 3 L33: 2.5874 L12: 0.1210  
 REMARK 3 L13: -0.8100 L23: 0.3602  
 REMARK 3 S TENSOR  
 REMARK 3 S11: -0.0850 S12: -0.0937 S13: -0.2803  
 REMARK 3 S21: -0.0877 S22: -0.0216 S23: -0.1703  
 REMARK 3 S31: 0.3560 S32: 0.0875 S33: 0.1066  
 REMARK 3  
 REMARK 3 TLS GROUP : 2  
 REMARK 3 NUMBER OF COMPONENTS GROUP : 2

REMARK 3 COMPONENTS C SSSEQI TO C SSSEQI  
REMARK 3 RESIDUE RANGE : B 1 B 206  
REMARK 3 RESIDUE RANGE : B 401 B 401  
REMARK 3 ORIGIN FOR THE GROUP (A): -56.1929 -6.1927 22.4720  
REMARK 3 T TENSOR  
REMARK 3 T11: 0.0203 T22: 0.1550  
REMARK 3 T33: 0.0361 T12: -0.0476  
REMARK 3 T13: -0.0022 T23: -0.0313  
REMARK 3 L TENSOR  
REMARK 3 L11: 1.2251 L22: 2.0467  
REMARK 3 L33: 3.2911 L12: -0.4582  
REMARK 3 L13: -0.2252 L23: -0.3222  
REMARK 3 S TENSOR  
REMARK 3 S11: -0.0366 S12: 0.1501 S13: -0.0810  
REMARK 3 S21: -0.0956 S22: -0.0100 S23: 0.2482  
REMARK 3 S31: 0.1118 S32: -0.3790 S33: 0.0466  
REMARK 3  
REMARK 3 TLS GROUP : 3  
REMARK 3 NUMBER OF COMPONENTS GROUP : 2  
REMARK 3 COMPONENTS C SSSEQI TO C SSSEQI  
REMARK 3 RESIDUE RANGE : C 1 C 205  
REMARK 3 RESIDUE RANGE : C 401 C 401  
REMARK 3 ORIGIN FOR THE GROUP (A): -47.1558 19.5709 23.3599  
REMARK 3 T TENSOR  
REMARK 3 T11: 0.1344 T22: 0.1767  
REMARK 3 T33: 0.1810 T12: 0.0101  
REMARK 3 T13: 0.0628 T23: 0.0265  
REMARK 3 L TENSOR  
REMARK 3 L11: 1.3003 L22: 0.9273  
REMARK 3 L33: 2.7518 L12: 0.4528  
REMARK 3 L13: 0.6272 L23: 0.3179  
REMARK 3 S TENSOR  
REMARK 3 S11: 0.0021 S12: 0.1539 S13: 0.4096  
REMARK 3 S21: -0.0988 S22: 0.0752 S23: 0.1539  
REMARK 3 S31: -0.4126 S32: -0.1760 S33: -0.0773  
REMARK 3  
REMARK 3 TLS GROUP : 4  
REMARK 3 NUMBER OF COMPONENTS GROUP : 2  
REMARK 3 COMPONENTS C SSSEQI TO C SSSEQI  
REMARK 3 RESIDUE RANGE : D 1 D 205  
REMARK 3 RESIDUE RANGE : D 401 D 401  
REMARK 3 ORIGIN FOR THE GROUP (A): -20.4393 19.3777 19.7061  
REMARK 3 T TENSOR  
REMARK 3 T11: 0.1344 T22: 0.1549  
REMARK 3 T33: 0.1218 T12: -0.0928  
REMARK 3 T13: 0.0775 T23: -0.0505  
REMARK 3 L TENSOR  
REMARK 3 L11: 2.4681 L22: 1.4548  
REMARK 3 L33: 3.1043 L12: -0.1559  
REMARK 3 L13: -0.3269 L23: -0.3217  
REMARK 3 S TENSOR  
REMARK 3 S11: -0.0211 S12: -0.0115 S13: 0.2279  
REMARK 3 S21: -0.1792 S22: 0.0539 S23: -0.1755  
REMARK 3 S31: -0.2084 S32: 0.1716 S33: -0.0328

REMARK 3  
REMARK 3 TLS GROUP : 5  
REMARK 3 NUMBER OF COMPONENTS GROUP : 2  
REMARK 3 COMPONENTS C SSSEQI TO C SSSEQI  
REMARK 3 RESIDUE RANGE : E 1 E 205  
REMARK 3 RESIDUE RANGE : E 401 E 401  
REMARK 3 ORIGIN FOR THE GROUP (A): -13.1587 -6.5743 16.3587  
REMARK 3 T TENSOR  
REMARK 3 T11: 0.0978 T22: 0.2841  
REMARK 3 T33: 0.2317 T12: 0.0037  
REMARK 3 T13: 0.1215 T23: 0.0202  
REMARK 3 L TENSOR  
REMARK 3 L11: 1.1846 L22: 2.1182  
REMARK 3 L33: 3.0528 L12: 0.3617  
REMARK 3 L13: -0.0447 L23: 0.2326  
REMARK 3 S TENSOR  
REMARK 3 S11: -0.0760 S12: -0.0773 S13: -0.1420  
REMARK 3 S21: -0.1915 S22: 0.0393 S23: -0.5289  
REMARK 3 S31: -0.0891 S32: 0.3851 S33: 0.0367  
REMARK 3  
REMARK 3 BULK SOLVENT MODELLING.  
REMARK 3 METHOD USED : BABINET MODEL PLUS MASK  
REMARK 3 PARAMETERS FOR MASK CALCULATION  
REMARK 3 VDW PROBE RADIUS : 1.20  
REMARK 3 ION PROBE RADIUS : 0.80  
REMARK 3 SHRINKAGE RADIUS : 0.80  
REMARK 3  
REMARK 3 OTHER REFINEMENT REMARKS: 1. HYDROGENS HAVE BEEN ADDED IN THEIR  
REMARK 3 RIDING POSITIONS.  
REMARK 3 2. EXTRA H ATOM ON H8U IS PROTONATION OF TERT-AMINE.  
REMARK 4  
REMARK 4 7DJI COMPLIES WITH FORMAT V. 3.30, 13-JUL-11  
REMARK 100  
REMARK 100 THIS ENTRY HAS BEEN PROCESSED BY PDBJ ON 27-NOV-20.  
REMARK 100 THE DEPOSITION ID IS D\_1300018366.  
REMARK 200  
REMARK 200 EXPERIMENTAL DETAILS  
REMARK 200 EXPERIMENT TYPE : X-RAY DIFFRACTION  
REMARK 200 DATE OF DATA COLLECTION : 15-APR-17  
REMARK 200 TEMPERATURE (KELVIN) : 100  
REMARK 200 PH : 5.0  
REMARK 200 NUMBER OF CRYSTALS USED : 1  
REMARK 200  
REMARK 200 SYNCHROTRON (Y/N) : Y  
REMARK 200 RADIATION SOURCE : SPRING-8  
REMARK 200 BEAMLINE : BL26B1  
REMARK 200 X-RAY GENERATOR MODEL : NULL  
REMARK 200 MONOCHROMATIC OR LAUE (M/L) : M  
REMARK 200 WAVELENGTH OR RANGE (A) : 1.0  
REMARK 200 MONOCHROMATOR : SI  
REMARK 200 OPTICS : NULL  
REMARK 200  
REMARK 200 DETECTOR TYPE : CCD  
REMARK 200 DETECTOR MANUFACTURER : RAYONIX MX225HE

REMARK 200 INTENSITY-INTEGRATION SOFTWARE : XDS VERSION MAR 15, 2019  
REMARK 200 BUILT=20191211  
REMARK 200 DATA SCALING SOFTWARE : AIMLESS 0.7.4  
REMARK 200  
REMARK 200 NUMBER OF UNIQUE REFLECTIONS : 55263  
REMARK 200 RESOLUTION RANGE HIGH (A) : 2.200  
REMARK 200 RESOLUTION RANGE LOW (A) : 47.374  
REMARK 200 REJECTION CRITERIA (SIGMA(I)) : NULL  
REMARK 200  
REMARK 200 OVERALL.  
REMARK 200 COMPLETENESS FOR RANGE (%) : 100.0  
REMARK 200 DATA REDUNDANCY : 10.80  
REMARK 200 R MERGE (I) : 0.07100  
REMARK 200 R SYM (I) : NULL  
REMARK 200 <I/SIGMA(I)> FOR THE DATA SET : 21.7000  
REMARK 200  
REMARK 200 IN THE HIGHEST RESOLUTION SHELL.  
REMARK 200 HIGHEST RESOLUTION SHELL, RANGE HIGH (A) : 2.20  
REMARK 200 HIGHEST RESOLUTION SHELL, RANGE LOW (A) : 2.26  
REMARK 200 COMPLETENESS FOR SHELL (%) : 100.0  
REMARK 200 DATA REDUNDANCY IN SHELL : 7.10  
REMARK 200 R MERGE FOR SHELL (I) : 0.71300  
REMARK 200 R SYM FOR SHELL (I) : NULL  
REMARK 200 <I/SIGMA(I)> FOR SHELL : NULL  
REMARK 200  
REMARK 200 DIFFRACTION PROTOCOL: SINGLE WAVELENGTH  
REMARK 200 METHOD USED TO DETERMINE THE STRUCTURE: MOLECULAR REPLACEMENT  
REMARK 200 SOFTWARE USED: PHASER 2.8.3  
REMARK 200 STARTING MODEL: 2ZJU  
REMARK 200  
REMARK 200 REMARK: ROD  
REMARK 280  
REMARK 280 CRYSTAL  
REMARK 280 SOLVENT CONTENT, VS (%): 48.82  
REMARK 280 MATTHEWS COEFFICIENT, VM (ANGSTROMS\*\*3/DA): 2.40  
REMARK 280  
REMARK 280 CRYSTALLIZATION CONDITIONS: 14.1-15.6% PEG 4000, SODIUM CITRATE  
REMARK 280 BUFFER PH 5.0, VAPOR DIFFUSION, SITTING DROP, TEMPERATURE 298K  
REMARK 290  
REMARK 290 CRYSTALLOGRAPHIC SYMMETRY  
REMARK 290 SYMMETRY OPERATORS FOR SPACE GROUP: P 65  
REMARK 290  
REMARK 290 SYMOP SYMMETRY  
REMARK 290 NNNMMM OPERATOR  
REMARK 290 1555 X,Y,Z  
REMARK 290 2555 -Y,X-Y,Z+2/3  
REMARK 290 3555 -X+Y,-X,Z+1/3  
REMARK 290 4555 -X,-Y,Z+1/2  
REMARK 290 5555 Y,-X+Y,Z+1/6  
REMARK 290 6555 X-Y,X,Z+5/6  
REMARK 290  
REMARK 290 WHERE NNN -> OPERATOR NUMBER  
REMARK 290 MMM -> TRANSLATION VECTOR  
REMARK 290

REMARK 290 CRYSTALLOGRAPHIC SYMMETRY TRANSFORMATIONS  
REMARK 290 THE FOLLOWING TRANSFORMATIONS OPERATE ON THE ATOM/HETATM  
REMARK 290 RECORDS IN THIS ENTRY TO PRODUCE CRYSTALLOGRAPHICALLY  
REMARK 290 RELATED MOLECULES.

|            |        |   |           |           |          |           |
|------------|--------|---|-----------|-----------|----------|-----------|
| REMARK 290 | SMTRY1 | 1 | 1.000000  | 0.000000  | 0.000000 | 0.000000  |
| REMARK 290 | SMTRY2 | 1 | 0.000000  | 1.000000  | 0.000000 | 0.000000  |
| REMARK 290 | SMTRY3 | 1 | 0.000000  | 0.000000  | 1.000000 | 0.000000  |
| REMARK 290 | SMTRY1 | 2 | -0.500000 | -0.866025 | 0.000000 | 0.000000  |
| REMARK 290 | SMTRY2 | 2 | 0.866025  | -0.500000 | 0.000000 | 0.000000  |
| REMARK 290 | SMTRY3 | 2 | 0.000000  | 0.000000  | 1.000000 | 233.06333 |
| REMARK 290 | SMTRY1 | 3 | -0.500000 | 0.866025  | 0.000000 | 0.000000  |
| REMARK 290 | SMTRY2 | 3 | -0.866025 | -0.500000 | 0.000000 | 0.000000  |
| REMARK 290 | SMTRY3 | 3 | 0.000000  | 0.000000  | 1.000000 | 116.53167 |
| REMARK 290 | SMTRY1 | 4 | -1.000000 | 0.000000  | 0.000000 | 0.000000  |
| REMARK 290 | SMTRY2 | 4 | 0.000000  | -1.000000 | 0.000000 | 0.000000  |
| REMARK 290 | SMTRY3 | 4 | 0.000000  | 0.000000  | 1.000000 | 174.79750 |
| REMARK 290 | SMTRY1 | 5 | 0.500000  | 0.866025  | 0.000000 | 0.000000  |
| REMARK 290 | SMTRY2 | 5 | -0.866025 | 0.500000  | 0.000000 | 0.000000  |
| REMARK 290 | SMTRY3 | 5 | 0.000000  | 0.000000  | 1.000000 | 58.26583  |
| REMARK 290 | SMTRY1 | 6 | 0.500000  | -0.866025 | 0.000000 | 0.000000  |
| REMARK 290 | SMTRY2 | 6 | 0.866025  | 0.500000  | 0.000000 | 0.000000  |
| REMARK 290 | SMTRY3 | 6 | 0.000000  | 0.000000  | 1.000000 | 291.32917 |

REMARK 290

REMARK 290 REMARK: NULL

REMARK 300

REMARK 300 BIOMOLECULE: 1

REMARK 300 SEE REMARK 350 FOR THE AUTHOR PROVIDED AND/OR PROGRAM  
REMARK 300 GENERATED ASSEMBLY INFORMATION FOR THE STRUCTURE IN  
REMARK 300 THIS ENTRY. THE REMARK MAY ALSO PROVIDE INFORMATION ON  
REMARK 300 BURIED SURFACE AREA.

REMARK 350

REMARK 350 COORDINATES FOR A COMPLETE MULTIMER REPRESENTING THE KNOWN  
REMARK 350 BIOLOGICALLY SIGNIFICANT OLIGOMERIZATION STATE OF THE  
REMARK 350 MOLECULE CAN BE GENERATED BY APPLYING BIOMT TRANSFORMATIONS  
REMARK 350 GIVEN BELOW. BOTH NON-CRYSTALLOGRAPHIC AND  
REMARK 350 CRYSTALLOGRAPHIC OPERATIONS ARE GIVEN.

REMARK 350

REMARK 350 BIOMOLECULE: 1

REMARK 350 AUTHOR DETERMINED BIOLOGICAL UNIT: PENTAMERIC  
REMARK 350 SOFTWARE DETERMINED QUATERNARY STRUCTURE: PENTAMERIC  
REMARK 350 SOFTWARE USED: PISA

REMARK 350 TOTAL BURIED SURFACE AREA: 14180 ANGSTROM\*\*2

REMARK 350 SURFACE AREA OF THE COMPLEX: 43850 ANGSTROM\*\*2

REMARK 350 CHANGE IN SOLVENT FREE ENERGY: -32.0 KCAL/MOL

REMARK 350 APPLY THE FOLLOWING TO CHAINS: A, B, C, D, E

|            |        |   |          |          |          |          |
|------------|--------|---|----------|----------|----------|----------|
| REMARK 350 | BIOMT1 | 1 | 1.000000 | 0.000000 | 0.000000 | 0.000000 |
|------------|--------|---|----------|----------|----------|----------|

|            |        |   |          |          |          |          |
|------------|--------|---|----------|----------|----------|----------|
| REMARK 350 | BIOMT2 | 1 | 0.000000 | 1.000000 | 0.000000 | 0.000000 |
|------------|--------|---|----------|----------|----------|----------|

|            |        |   |          |          |          |          |
|------------|--------|---|----------|----------|----------|----------|
| REMARK 350 | BIOMT3 | 1 | 0.000000 | 0.000000 | 1.000000 | 0.000000 |
|------------|--------|---|----------|----------|----------|----------|

REMARK 465

REMARK 465 MISSING RESIDUES

REMARK 465 THE FOLLOWING RESIDUES WERE NOT LOCATED IN THE  
REMARK 465 EXPERIMENT. (M=MODEL NUMBER; RES=RESIDUE NAME; C=CHAIN  
REMARK 465 IDENTIFIER; SSSEQ=SEQUENCE NUMBER; I=INSERTION CODE.)

REMARK 465

REMARK 465 M RES C SSSEQI  
REMARK 465 GLU A -3  
REMARK 465 ALA A -2  
REMARK 465 GLU A -1  
REMARK 465 ALA A 0  
REMARK 465 ARG A 206  
REMARK 465 SER A 207  
REMARK 465 GLU A 208  
REMARK 465 ILE A 209  
REMARK 465 LEU A 210  
REMARK 465 GLU B -3  
REMARK 465 ALA B -2  
REMARK 465 GLU B -1  
REMARK 465 ALA B 0  
REMARK 465 SER B 207  
REMARK 465 GLU B 208  
REMARK 465 ILE B 209  
REMARK 465 LEU B 210  
REMARK 465 GLU C -3  
REMARK 465 ALA C -2  
REMARK 465 GLU C -1  
REMARK 465 ALA C 0  
REMARK 465 ARG C 206  
REMARK 465 SER C 207  
REMARK 465 GLU C 208  
REMARK 465 ILE C 209  
REMARK 465 LEU C 210  
REMARK 465 GLU D -3  
REMARK 465 ALA D -2  
REMARK 465 GLU D -1  
REMARK 465 ALA D 0  
REMARK 465 ARG D 206  
REMARK 465 SER D 207  
REMARK 465 GLU D 208  
REMARK 465 ILE D 209  
REMARK 465 LEU D 210  
REMARK 465 GLU E -3  
REMARK 465 ALA E -2  
REMARK 465 GLU E -1  
REMARK 465 ALA E 0  
REMARK 465 ARG E 206  
REMARK 465 SER E 207  
REMARK 465 GLU E 208  
REMARK 465 ILE E 209  
REMARK 465 LEU E 210  
REMARK 500

REMARK 500 GEOMETRY AND STEREOCHEMISTRY

REMARK 500 SUBTOPIC: TORSION ANGLES

REMARK 500

REMARK 500 TORSION ANGLES OUTSIDE THE EXPECTED RAMACHANDRAN REGIONS:

REMARK 500 (M=MODEL NUMBER; RES=RESIDUE NAME; C=CHAIN IDENTIFIER;

REMARK 500 SSEQ=SEQUENCE NUMBER; I=INSERTION CODE).

REMARK 500

REMARK 500 STANDARD TABLE:



REMARK 500 FORMAT:(10X,I3,1X,A3,1X,A1,I4,A1,4X,F7.2,3X,F7.2)

REMARK 500

REMARK 500 EXPECTED VALUES: GJ KLEYWEGT AND TA JONES (1996). PHI/PSI-  
REMARK 500 CHOLOGY: RAMACHANDRAN REVISITED. STRUCTURE 4, 1395 - 1400

REMARK 500

REMARK 500 M RES CSSEQI PSI PHI

REMARK 500 ARG A 23 -124.86 53.19

REMARK 500 ARG B 23 -147.57 58.40

REMARK 500 ASP B 24 35.38 -96.23

REMARK 500 SER B 67 52.89 -113.20

REMARK 500 THR C 156 66.06 -106.30

REMARK 500 ARG D 23 -141.71 55.68

REMARK 500 ASP D 24 44.17 -102.95

REMARK 500 ASP D 129 56.40 -101.22

REMARK 500 SER E 162 35.75 -96.45

REMARK 500

REMARK 500 REMARK: NULL

REMARK 500

REMARK 500 GEOMETRY AND STEREOCHEMISTRY

REMARK 500 SUBTOPIC: NON-CIS, NON-TRANS

REMARK 500

REMARK 500 THE FOLLOWING PEPTIDE BONDS DEVIATE SIGNIFICANTLY FROM BOTH

REMARK 500 CIS AND TRANS CONFORMATION. CIS BONDS, IF ANY, ARE LISTED

REMARK 500 ON CISPEP RECORDS. TRANS IS DEFINED AS 180 +/- 30 AND

REMARK 500 CIS IS DEFINED AS 0 +/- 30 DEGREES.

REMARK 500 MODEL OMEGA

REMARK 500 CYS B 187 CYS B 188 -149.78

REMARK 500

REMARK 500 REMARK: NULL

DBREF 7DJI A 2 210 UNP P58154 ACHP\_LYMST 21 229

DBREF 7DJI B 2 210 UNP P58154 ACHP\_LYMST 21 229

DBREF 7DJI C 2 210 UNP P58154 ACHP\_LYMST 21 229

DBREF 7DJI D 2 210 UNP P58154 ACHP\_LYMST 21 229

DBREF 7DJI E 2 210 UNP P58154 ACHP\_LYMST 21 229

SEQADV 7DJI GLU A -3 UNP P58154 EXPRESSION TAG

SEQADV 7DJI ALA A -2 UNP P58154 EXPRESSION TAG

SEQADV 7DJI GLU A -1 UNP P58154 EXPRESSION TAG

SEQADV 7DJI ALA A 0 UNP P58154 EXPRESSION TAG

SEQADV 7DJI ALA A 1 UNP P58154 EXPRESSION TAG

SEQADV 7DJI GLU B -3 UNP P58154 EXPRESSION TAG

SEQADV 7DJI ALA B -2 UNP P58154 EXPRESSION TAG

SEQADV 7DJI GLU B -1 UNP P58154 EXPRESSION TAG

SEQADV 7DJI ALA B 0 UNP P58154 EXPRESSION TAG

SEQADV 7DJI ALA B 1 UNP P58154 EXPRESSION TAG

SEQADV 7DJI GLU C -3 UNP P58154 EXPRESSION TAG

SEQADV 7DJI ALA C -2 UNP P58154 EXPRESSION TAG

SEQADV 7DJI GLU C -1 UNP P58154 EXPRESSION TAG

SEQADV 7DJI ALA C 0 UNP P58154 EXPRESSION TAG

SEQADV 7DJI ALA C 1 UNP P58154 EXPRESSION TAG

SEQADV 7DJI GLU D -3 UNP P58154 EXPRESSION TAG

SEQADV 7DJI ALA D -2 UNP P58154 EXPRESSION TAG

SEQADV 7DJI GLU D -1 UNP P58154 EXPRESSION TAG

SEQADV 7DJI ALA D 0 UNP P58154 EXPRESSION TAG

SEQADV 7DJI ALA D 1 UNP P58154 EXPRESSION TAG

SEQADV 7DJI GLU E -3 UNP P58154 EXPRESSION TAG  
SEQADV 7DJI ALA E -2 UNP P58154 EXPRESSION TAG  
SEQADV 7DJI GLU E -1 UNP P58154 EXPRESSION TAG  
SEQADV 7DJI ALA E 0 UNP P58154 EXPRESSION TAG  
SEQADV 7DJI ALA E 1 UNP P58154 EXPRESSION TAG  
SEQRES 1 A 214 GLU ALA GLU ALA ALA ASP ARG ALA ASP ILE LEU TYR ASN  
SEQRES 2 A 214 ILE ARG GLN THR SER ARG PRO ASP VAL ILE PRO THR GLN  
SEQRES 3 A 214 ARG ASP ARG PRO VAL ALA VAL SER VAL SER LEU LYS PHE  
SEQRES 4 A 214 ILE ASN ILE LEU GLU VAL ASN GLU ILE THR ASN GLU VAL  
SEQRES 5 A 214 ASP VAL VAL PHE TRP GLN GLN THR THR TRP SER ASP ARG  
SEQRES 6 A 214 THR LEU ALA TRP ASN SER SER HIS SER PRO ASP GLN VAL  
SEQRES 7 A 214 SER VAL PRO ILE SER SER LEU TRP VAL PRO ASP LEU ALA  
SEQRES 8 A 214 ALA TYR ASN ALA ILE SER LYS PRO GLU VAL LEU THR PRO  
SEQRES 9 A 214 GLN LEU ALA ARG VAL VAL SER ASP GLY GLU VAL LEU TYR  
SEQRES 10 A 214 MET PRO SER ILE ARG GLN ARG PHE SER CYS ASP VAL SER  
SEQRES 11 A 214 GLY VAL ASP THR GLU SER GLY ALA THR CYS ARG ILE LYS  
SEQRES 12 A 214 ILE GLY SER TRP THR HIS HIS SER ARG GLU ILE SER VAL  
SEQRES 13 A 214 ASP PRO THR THR GLU ASN SER ASP ASP SER GLU TYR PHE  
SEQRES 14 A 214 SER GLN TYR SER ARG PHE GLU ILE LEU ASP VAL THR GLN  
SEQRES 15 A 214 LYS LYS ASN SER VAL THR TYR SER CYS CYS PRO GLU ALA  
SEQRES 16 A 214 TYR GLU ASP VAL GLU VAL SER LEU ASN PHE ARG LYS LYS  
SEQRES 17 A 214 GLY ARG SER GLU ILE LEU  
SEQRES 1 B 214 GLU ALA GLU ALA ALA ASP ARG ALA ASP ILE LEU TYR ASN  
SEQRES 2 B 214 ILE ARG GLN THR SER ARG PRO ASP VAL ILE PRO THR GLN  
SEQRES 3 B 214 ARG ASP ARG PRO VAL ALA VAL SER VAL SER LEU LYS PHE  
SEQRES 4 B 214 ILE ASN ILE LEU GLU VAL ASN GLU ILE THR ASN GLU VAL  
SEQRES 5 B 214 ASP VAL VAL PHE TRP GLN GLN THR THR TRP SER ASP ARG  
SEQRES 6 B 214 THR LEU ALA TRP ASN SER SER HIS SER PRO ASP GLN VAL  
SEQRES 7 B 214 SER VAL PRO ILE SER SER LEU TRP VAL PRO ASP LEU ALA  
SEQRES 8 B 214 ALA TYR ASN ALA ILE SER LYS PRO GLU VAL LEU THR PRO  
SEQRES 9 B 214 GLN LEU ALA ARG VAL VAL SER ASP GLY GLU VAL LEU TYR  
SEQRES 10 B 214 MET PRO SER ILE ARG GLN ARG PHE SER CYS ASP VAL SER  
SEQRES 11 B 214 GLY VAL ASP THR GLU SER GLY ALA THR CYS ARG ILE LYS  
SEQRES 12 B 214 ILE GLY SER TRP THR HIS HIS SER ARG GLU ILE SER VAL  
SEQRES 13 B 214 ASP PRO THR THR GLU ASN SER ASP ASP SER GLU TYR PHE  
SEQRES 14 B 214 SER GLN TYR SER ARG PHE GLU ILE LEU ASP VAL THR GLN  
SEQRES 15 B 214 LYS LYS ASN SER VAL THR TYR SER CYS CYS PRO GLU ALA  
SEQRES 16 B 214 TYR GLU ASP VAL GLU VAL SER LEU ASN PHE ARG LYS LYS  
SEQRES 17 B 214 GLY ARG SER GLU ILE LEU  
SEQRES 1 C 214 GLU ALA GLU ALA ALA ASP ARG ALA ASP ILE LEU TYR ASN  
SEQRES 2 C 214 ILE ARG GLN THR SER ARG PRO ASP VAL ILE PRO THR GLN  
SEQRES 3 C 214 ARG ASP ARG PRO VAL ALA VAL SER VAL SER LEU LYS PHE  
SEQRES 4 C 214 ILE ASN ILE LEU GLU VAL ASN GLU ILE THR ASN GLU VAL  
SEQRES 5 C 214 ASP VAL VAL PHE TRP GLN GLN THR THR TRP SER ASP ARG  
SEQRES 6 C 214 THR LEU ALA TRP ASN SER SER HIS SER PRO ASP GLN VAL  
SEQRES 7 C 214 SER VAL PRO ILE SER SER LEU TRP VAL PRO ASP LEU ALA  
SEQRES 8 C 214 ALA TYR ASN ALA ILE SER LYS PRO GLU VAL LEU THR PRO  
SEQRES 9 C 214 GLN LEU ALA ARG VAL VAL SER ASP GLY GLU VAL LEU TYR  
SEQRES 10 C 214 MET PRO SER ILE ARG GLN ARG PHE SER CYS ASP VAL SER  
SEQRES 11 C 214 GLY VAL ASP THR GLU SER GLY ALA THR CYS ARG ILE LYS  
SEQRES 12 C 214 ILE GLY SER TRP THR HIS HIS SER ARG GLU ILE SER VAL  
SEQRES 13 C 214 ASP PRO THR THR GLU ASN SER ASP ASP SER GLU TYR PHE  
SEQRES 14 C 214 SER GLN TYR SER ARG PHE GLU ILE LEU ASP VAL THR GLN  
SEQRES 15 C 214 LYS LYS ASN SER VAL THR TYR SER CYS CYS PRO GLU ALA

SEQRES 16 C 214 TYR GLU ASP VAL GLU VAL SER LEU ASN PHE ARG LYS LYS  
 SEQRES 17 C 214 GLY ARG SER GLU ILE LEU  
 SEQRES 1 D 214 GLU ALA GLU ALA ALA ASP ARG ALA ASP ILE LEU TYR ASN  
 SEQRES 2 D 214 ILE ARG GLN THR SER ARG PRO ASP VAL ILE PRO THR GLN  
 SEQRES 3 D 214 ARG ASP ARG PRO VAL ALA VAL SER VAL SER LEU LYS PHE  
 SEQRES 4 D 214 ILE ASN ILE LEU GLU VAL ASN GLU ILE THR ASN GLU VAL  
 SEQRES 5 D 214 ASP VAL VAL PHE TRP GLN GLN THR THR TRP SER ASP ARG  
 SEQRES 6 D 214 THR LEU ALA TRP ASN SER SER HIS SER PRO ASP GLN VAL  
 SEQRES 7 D 214 SER VAL PRO ILE SER SER LEU TRP VAL PRO ASP LEU ALA  
 SEQRES 8 D 214 ALA TYR ASN ALA ILE SER LYS PRO GLU VAL LEU THR PRO  
 SEQRES 9 D 214 GLN LEU ALA ARG VAL VAL SER ASP GLY GLU VAL LEU TYR  
 SEQRES 10 D 214 MET PRO SER ILE ARG GLN ARG PHE SER CYS ASP VAL SER  
 SEQRES 11 D 214 GLY VAL ASP THR GLU SER GLY ALA THR CYS ARG ILE LYS  
 SEQRES 12 D 214 ILE GLY SER TRP THR HIS HIS SER ARG GLU ILE SER VAL  
 SEQRES 13 D 214 ASP PRO THR THR GLU ASN SER ASP ASP SER GLU TYR PHE  
 SEQRES 14 D 214 SER GLN TYR SER ARG PHE GLU ILE LEU ASP VAL THR GLN  
 SEQRES 15 D 214 LYS LYS ASN SER VAL THR TYR SER CYS CYS PRO GLU ALA  
 SEQRES 16 D 214 TYR GLU ASP VAL GLU VAL SER LEU ASN PHE ARG LYS LYS  
 SEQRES 17 D 214 GLY ARG SER GLU ILE LEU  
 SEQRES 1 E 214 GLU ALA GLU ALA ALA ASP ARG ALA ASP ILE LEU TYR ASN  
 SEQRES 2 E 214 ILE ARG GLN THR SER ARG PRO ASP VAL ILE PRO THR GLN  
 SEQRES 3 E 214 ARG ASP ARG PRO VAL ALA VAL SER VAL SER LEU LYS PHE  
 SEQRES 4 E 214 ILE ASN ILE LEU GLU VAL ASN GLU ILE THR ASN GLU VAL  
 SEQRES 5 E 214 ASP VAL VAL PHE TRP GLN GLN THR THR TRP SER ASP ARG  
 SEQRES 6 E 214 THR LEU ALA TRP ASN SER SER HIS SER PRO ASP GLN VAL  
 SEQRES 7 E 214 SER VAL PRO ILE SER SER LEU TRP VAL PRO ASP LEU ALA  
 SEQRES 8 E 214 ALA TYR ASN ALA ILE SER LYS PRO GLU VAL LEU THR PRO  
 SEQRES 9 E 214 GLN LEU ALA ARG VAL VAL SER ASP GLY GLU VAL LEU TYR  
 SEQRES 10 E 214 MET PRO SER ILE ARG GLN ARG PHE SER CYS ASP VAL SER  
 SEQRES 11 E 214 GLY VAL ASP THR GLU SER GLY ALA THR CYS ARG ILE LYS  
 SEQRES 12 E 214 ILE GLY SER TRP THR HIS HIS SER ARG GLU ILE SER VAL  
 SEQRES 13 E 214 ASP PRO THR THR GLU ASN SER ASP ASP SER GLU TYR PHE  
 SEQRES 14 E 214 SER GLN TYR SER ARG PHE GLU ILE LEU ASP VAL THR GLN  
 SEQRES 15 E 214 LYS LYS ASN SER VAL THR TYR SER CYS CYS PRO GLU ALA  
 SEQRES 16 E 214 TYR GLU ASP VAL GLU VAL SER LEU ASN PHE ARG LYS LYS  
 SEQRES 17 E 214 GLY ARG SER GLU ILE LEU  
 HET H8U A 401 71  
 HET NAG A 402 25  
 HET H8U B 401 71  
 HET NAG B 402 25  
 HET H8U C 401 71  
 HET NAG C 402 25  
 HET H8U D 401 71  
 HET NAG D 402 25  
 HET H8U E 401 71  
 HET NAG E 402 25  
 HETNAM H8U PARAHYDROQUAMIDE A  
 HETNAM NAG 2-ACETAMIDO-2-DEOXY-BETA-D-GLUCOPYRANOSE  
 HETSYN NAG N-ACETYL-BETA-D-GLUCOSAMINE; 2-ACETAMIDO-2-DEOXY-BETA-  
 HETSYN 2 NAG D-GLUCOSE; 2-ACETAMIDO-2-DEOXY-D-GLUCOSE; 2-ACETAMIDO-  
 HETSYN 3 NAG 2-DEOXY-GLUCOSE; N-ACETYL-D-GLUCOSAMINE  
 FORMUL 6 H8U 5(C28 H35 N3 O5)  
 FORMUL 7 NAG 5(C8 H15 N O6)  
 FORMUL 16 HOH \*486(H2 O)

|       |    |     |     |     |    |     |     |    |     |    |
|-------|----|-----|-----|-----|----|-----|-----|----|-----|----|
| HELIX | 1  | AA1 | ASP | A   | 2  | SER | A   | 14 | 1   | 13 |
| HELIX | 2  | AA2 | ARG | A   | 61 | ALA | A   | 64 | 5   | 4  |
| HELIX | 3  | AA3 | SER | A   | 79 | LEU | A   | 81 | 5   | 3  |
| HELIX | 4  | AA4 | ASP | B   | 2  | SER | B   | 14 | 1   | 13 |
| HELIX | 5  | AA5 | SER | B   | 79 | LEU | B   | 81 | 5   | 3  |
| HELIX | 6  | AA6 | ASP | C   | 2  | SER | C   | 14 | 1   | 13 |
| HELIX | 7  | AA7 | THR | C   | 21 | ARG | C   | 25 | 5   | 5  |
| HELIX | 8  | AA8 | SER | C   | 79 | LEU | C   | 81 | 5   | 3  |
| HELIX | 9  | AA9 | ASP | D   | 2  | SER | D   | 14 | 1   | 13 |
| HELIX | 10 | AB1 | ARG | D   | 61 | ALA | D   | 64 | 5   | 4  |
| HELIX | 11 | AB2 | SER | D   | 79 | LEU | D   | 81 | 5   | 3  |
| HELIX | 12 | AB3 | ASP | E   | 2  | SER | E   | 14 | 1   | 13 |
| HELIX | 13 | AB4 | ARG | E   | 61 | ALA | E   | 64 | 5   | 4  |
| HELIX | 14 | AB5 | SER | E   | 79 | LEU | E   | 81 | 5   | 3  |
| SHEET | 1  | AA1 | 6   | GLN | A  | 73  | PRO | A  | 77  | 0  |
| SHEET | 2  | AA1 | 6   | LEU | A  | 102 | VAL | A  | 106 | -1 |
| SHEET | 3  | AA1 | 6   | GLU | A  | 110 | TYR | A  | 113 | -1 |
| SHEET | 4  | AA1 | 6   | GLU | A  | 47  | SER | A  | 59  | -1 |
| SHEET | 5  | AA1 | 6   | SER | A  | 116 | SER | A  | 122 | -1 |
| SHEET | 6  | AA1 | 6   | GLU | A  | 96  | VAL | A  | 97  | -1 |
| SHEET | 1  | AA2 | 6   | GLN | A  | 73  | PRO | A  | 77  | 0  |
| SHEET | 2  | AA2 | 6   | LEU | A  | 102 | VAL | A  | 106 | -1 |
| SHEET | 3  | AA2 | 6   | GLU | A  | 110 | TYR | A  | 113 | -1 |
| SHEET | 4  | AA2 | 6   | GLU | A  | 47  | SER | A  | 59  | -1 |
| SHEET | 5  | AA2 | 6   | VAL | A  | 27  | ASN | A  | 42  | -1 |
| SHEET | 6  | AA2 | 6   | ILE | A  | 150 | ASP | A  | 153 | 1  |
| SHEET | 1  | AA3 | 4   | LEU | A  | 86  | ALA | A  | 88  | 0  |
| SHEET | 2  | AA3 | 4   | ALA | A  | 134 | SER | A  | 142 | -1 |
| SHEET | 3  | AA3 | 4   | TYR | A  | 192 | LYS | A  | 203 | -1 |
| SHEET | 4  | AA3 | 4   | PHE | A  | 171 | VAL | A  | 183 | -1 |
| SHEET | 1  | AA4 | 6   | GLN | B  | 73  | PRO | B  | 77  | 0  |
| SHEET | 2  | AA4 | 6   | LEU | B  | 102 | VAL | B  | 106 | -1 |
| SHEET | 3  | AA4 | 6   | GLU | B  | 110 | TYR | B  | 113 | -1 |
| SHEET | 4  | AA4 | 6   | GLU | B  | 47  | SER | B  | 59  | -1 |
| SHEET | 5  | AA4 | 6   | SER | B  | 116 | SER | B  | 122 | -1 |
| SHEET | 6  | AA4 | 6   | GLU | B  | 96  | VAL | B  | 97  | -1 |
| SHEET | 1  | AA5 | 6   | GLN | B  | 73  | PRO | B  | 77  | 0  |
| SHEET | 2  | AA5 | 6   | LEU | B  | 102 | VAL | B  | 106 | -1 |
| SHEET | 3  | AA5 | 6   | GLU | B  | 110 | TYR | B  | 113 | -1 |
| SHEET | 4  | AA5 | 6   | GLU | B  | 47  | SER | B  | 59  | -1 |
| SHEET | 5  | AA5 | 6   | VAL | B  | 27  | ASN | B  | 42  | -1 |
| SHEET | 6  | AA5 | 6   | ILE | B  | 150 | ASP | B  | 153 | 1  |
| SHEET | 1  | AA6 | 4   | LEU | B  | 86  | ALA | B  | 88  | 0  |
| SHEET | 2  | AA6 | 4   | ALA | B  | 134 | SER | B  | 142 | -1 |
| SHEET | 3  | AA6 | 4   | TYR | B  | 192 | LYS | B  | 203 | -1 |
| SHEET | 4  | AA6 | 4   | PHE | B  | 171 | VAL | B  | 183 | -1 |
| SHEET | 1  | AA7 | 6   | GLN | C  | 73  | PRO | C  | 77  | 0  |
| SHEET | 2  | AA7 | 6   | LEU | C  | 102 | VAL | C  | 106 | -1 |
| SHEET | 3  | AA7 | 6   | GLU | C  | 110 | TYR | C  | 113 | -1 |
| SHEET | 4  | AA7 | 6   | GLU | C  | 47  | SER | C  | 59  | -1 |
| SHEET | 5  | AA7 | 6   | SER | C  | 116 | SER | C  | 122 | -1 |
| SHEET | 6  | AA7 | 6   | GLU | C  | 96  | VAL | C  | 97  | -1 |
| SHEET | 1  | AA8 | 6   | GLN | C  | 73  | PRO | C  | 77  | 0  |
| SHEET | 2  | AA8 | 6   | LEU | C  | 102 | VAL | C  | 106 | -1 |

SHEET 3 AA8 6 GLU C 110 TYR C 113 -1 O LEU C 112 N ARG C 104  
 SHEET 4 AA8 6 GLU C 47 SER C 59 -1 N TRP C 58 O VAL C 111  
 SHEET 5 AA8 6 VAL C 27 ASN C 42 -1 N SER C 30 O THR C 57  
 SHEET 6 AA8 6 ILE C 150 ASP C 153 1 O SER C 151 N VAL C 29  
 SHEET 1 AA9 4 LEU C 86 ALA C 88 0  
 SHEET 2 AA9 4 ALA C 134 SER C 142 -1 O GLY C 141 N ALA C 87  
 SHEET 3 AA9 4 TYR C 192 LYS C 203 -1 O VAL C 197 N ILE C 138  
 SHEET 4 AA9 4 PHE C 171 VAL C 183 -1 N THR C 177 O SER C 198  
 SHEET 1 AB1 6 GLN D 73 PRO D 77 0  
 SHEET 2 AB1 6 LEU D 102 VAL D 106 -1 O ALA D 103 N VAL D 76  
 SHEET 3 AB1 6 GLU D 110 TYR D 113 -1 O LEU D 112 N ARG D 104  
 SHEET 4 AB1 6 GLU D 47 SER D 59 -1 N THR D 56 O TYR D 113  
 SHEET 5 AB1 6 SER D 116 SER D 122 -1 O ILE D 117 N PHE D 52  
 SHEET 6 AB1 6 GLU D 96 VAL D 97 -1 N GLU D 96 O ARG D 118  
 SHEET 1 AB2 6 GLN D 73 PRO D 77 0  
 SHEET 2 AB2 6 LEU D 102 VAL D 106 -1 O ALA D 103 N VAL D 76  
 SHEET 3 AB2 6 GLU D 110 TYR D 113 -1 O LEU D 112 N ARG D 104  
 SHEET 4 AB2 6 GLU D 47 SER D 59 -1 N THR D 56 O TYR D 113  
 SHEET 5 AB2 6 VAL D 27 ASN D 42 -1 N ILE D 36 O VAL D 51  
 SHEET 6 AB2 6 ILE D 150 PRO D 154 1 O SER D 151 N VAL D 29  
 SHEET 1 AB3 4 LEU D 86 ALA D 88 0  
 SHEET 2 AB3 4 ALA D 134 SER D 142 -1 O GLY D 141 N ALA D 87  
 SHEET 3 AB3 4 TYR D 192 LYS D 203 -1 O LEU D 199 N CYS D 136  
 SHEET 4 AB3 4 PHE D 171 VAL D 183 -1 N LYS D 179 O GLU D 196  
 SHEET 1 AB4 6 GLN E 73 PRO E 77 0  
 SHEET 2 AB4 6 LEU E 102 VAL E 106 -1 O ALA E 103 N VAL E 76  
 SHEET 3 AB4 6 GLU E 110 TYR E 113 -1 O LEU E 112 N ARG E 104  
 SHEET 4 AB4 6 GLU E 47 SER E 59 -1 N TRP E 58 O VAL E 111  
 SHEET 5 AB4 6 SER E 116 SER E 122 -1 O ILE E 117 N PHE E 52  
 SHEET 6 AB4 6 GLU E 96 VAL E 97 -1 N GLU E 96 O ARG E 118  
 SHEET 1 AB5 6 GLN E 73 PRO E 77 0  
 SHEET 2 AB5 6 LEU E 102 VAL E 106 -1 O ALA E 103 N VAL E 76  
 SHEET 3 AB5 6 GLU E 110 TYR E 113 -1 O LEU E 112 N ARG E 104  
 SHEET 4 AB5 6 GLU E 47 SER E 59 -1 N TRP E 58 O VAL E 111  
 SHEET 5 AB5 6 VAL E 27 ASN E 42 -1 N GLU E 40 O ASP E 49  
 SHEET 6 AB5 6 ILE E 150 PRO E 154 1 O SER E 151 N VAL E 29  
 SHEET 1 AB6 4 LEU E 86 ALA E 88 0  
 SHEET 2 AB6 4 ALA E 134 SER E 142 -1 O GLY E 141 N ALA E 87  
 SHEET 3 AB6 4 CYS E 188 LYS E 203 -1 O VAL E 197 N ILE E 138  
 SHEET 4 AB6 4 PHE E 171 TYR E 185 -1 N LYS E 179 O GLU E 196  
 SSBOND 1 CYS A 123 CYS A 136 1555 1555 2.06  
 SSBOND 2 CYS A 187 CYS A 188 1555 1555 2.06  
 SSBOND 3 CYS B 123 CYS B 136 1555 1555 2.05  
 SSBOND 4 CYS B 187 CYS B 188 1555 1555 2.06  
 SSBOND 5 CYS C 123 CYS C 136 1555 1555 2.05  
 SSBOND 6 CYS C 187 CYS C 188 1555 1555 2.06  
 SSBOND 7 CYS D 123 CYS D 136 1555 1555 2.04  
 SSBOND 8 CYS D 187 CYS D 188 1555 1555 2.05  
 SSBOND 9 CYS E 123 CYS E 136 1555 1555 2.05  
 SSBOND 10 CYS E 187 CYS E 188 1555 1555 2.06  
 LINK ND2 ASN A 66 C1 NAG A 402 1555 1555 1.44  
 LINK ND2 ASN B 66 C1 NAG B 402 1555 1555 1.44  
 LINK ND2 ASN C 66 C1 NAG C 402 1555 1555 1.44  
 LINK ND2 ASN D 66 C1 NAG D 402 1555 1555 1.44

| LINK   | ND2 ASN E 66 | C1 NAGE 402 | 1555     | 1555     | 1.45     |         |                    |
|--------|--------------|-------------|----------|----------|----------|---------|--------------------|
| CRYST1 | 74.373       | 74.373      | 349.595  | 90.00    | 90.00    | 120.00  | P 65 30            |
| ORIGX1 | 1.000000     | 0.000000    | 0.000000 | 0.000000 | 0.000000 |         |                    |
| ORIGX2 | 0.000000     | 1.000000    | 0.000000 | 0.000000 | 0.000000 |         |                    |
| ORIGX3 | 0.000000     | 0.000000    | 1.000000 | 0.000000 | 0.000000 |         |                    |
| SCALE1 | 0.013446     | 0.007763    | 0.000000 | 0.000000 | 0.000000 |         |                    |
| SCALE2 | 0.000000     | 0.015526    | 0.000000 | 0.000000 | 0.000000 |         |                    |
| SCALE3 | 0.000000     | 0.000000    | 0.002860 | 0.000000 | 0.000000 |         |                    |
| ATOM   | 1            | N           | ALA A 1  | -21.513  | -20.554  | -10.887 | 1.00 64.57 N0      |
| ANISOU | 1            | N           | ALA A 1  | 9600     | 7950     | 6980    | -240 2880 -1190 N0 |
| ATOM   | 2            | CA          | ALA A 1  | -22.235  | -19.546  | -10.050 | 1.00 62.76 C0      |
| ANISOU | 2            | CA          | ALA A 1  | 9370     | 7730     | 6750    | -270 2740 -1070 C0 |
| ATOM   | 3            | C           | ALA A 1  | -21.346  | -19.111  | -8.881  | 1.00 61.76 C0      |
| ANISOU | 3            | C           | ALA A 1  | 9080     | 7620     | 6770    | -240 2740 -1020 C0 |
| ATOM   | 4            | O           | ALA A 1  | -20.660  | -19.980  | -8.301  | 1.00 62.46 O0      |
| ANISOU | 4            | O           | ALA A 1  | 9040     | 7690     | 7000    | -160 2770 -1060 O0 |
| ATOM   | 5            | CB          | ALA A 1  | -23.542  | -20.114  | -9.545  | 1.00 61.91 C0      |
| ANISOU | 5            | CB          | ALA A 1  | 9300     | 7570     | 6650    | -240 2590 -1060 C0 |
| ATOM   | 6            | H           | ALA A 1  | -21.956  | -21.350  | -10.865 | 1.00 64.45 H0      |
| ANISOU | 6            | H           | ALA A 1  | 9610     | 7890     | 6980    | -210 2850 -1240 H0 |
| ATOM   | 7            | HA          | ALA A 1  | -22.427  | -18.757  | -10.609 | 1.00 62.93 H0      |
| ANISOU | 7            | HA          | ALA A 1  | 9470     | 7780     | 6660    | -330 2740 -1040 H0 |
| ATOM   | 8            | HB1         | ALA A 1  | -24.019  | -19.433  | -9.042  | 1.00 61.00 H0      |
| ANISOU | 8            | HB1         | ALA A 1  | 9190     | 7460     | 6530    | -250 2500 -990 H0  |
| ATOM   | 9            | HB2         | ALA A 1  | -24.086  | -20.398  | -10.299 | 1.00 62.35 H0      |
| ANISOU | 9            | HB2         | ALA A 1  | 9450     | 7630     | 6610    | -270 2590 -1100 H0 |
| ATOM   | 10           | HB3         | ALA A 1  | -23.366  | -20.876  | -8.969  | 1.00 61.72 H0      |
| ANISOU | 10           | HB3         | ALA A 1  | 9210     | 7500     | 6740    | -180 2590 -1090 H0 |
| ATOM   | 11           | N           | ASP A 2  | -21.373  | -17.818  | -8.546  | 1.00 59.44 N0      |
| ANISOU | 11           | N           | ASP A 2  | 8780     | 7350     | 6450    | -300 2700 -930 N0  |
| ATOM   | 12           | CA          | ASP A 2  | -20.668  | -17.253  | -7.367  | 1.00 57.76 C0      |
| ANISOU | 12           | CA          | ASP A 2  | 8420     | 7170     | 6350    | -300 2690 -890 C0  |
| ATOM   | 13           | C           | ASP A 2  | -21.708  | -16.992  | -6.268  | 1.00 54.71 C0      |
| ANISOU | 13           | C           | ASP A 2  | 8040     | 6740     | 6010    | -280 2520 -810 C0  |
| ATOM   | 14           | O           | ASP A 2  | -22.910  | -17.240  | -6.502  | 1.00 52.88 O0      |
| ANISOU | 14           | O           | ASP A 2  | 7910     | 6470     | 5710    | -260 2430 -790 O0  |
| ATOM   | 15           | CB          | ASP A 2  | -19.818  | -16.040  | -7.759  | 1.00 58.75 C0      |
| ANISOU | 15           | CB          | ASP A 2  | 8550     | 7350     | 6420    | -410 2800 -870 C0  |
| ATOM   | 16           | CG          | ASP A 2  | -20.582  | -14.814  | -8.239  | 1.00 58.90 C0      |
| ANISOU | 16           | CG          | ASP A 2  | 8740     | 7340     | 6300    | -490 2770 -790 C0  |
| ATOM   | 17           | OD1         | ASP A 2  | -21.838  | -14.833  | -8.201  | 1.00 57.24 O0      |
| ANISOU | 17           | OD1         | ASP A 2  | 8630     | 7080     | 6030    | -460 2640 -740 O0  |
| ATOM   | 18           | OD2         | ASP A 2  | -19.904  | -13.843  | -8.651  | 1.00 59.86 O0      |
| ANISOU | 18           | OD2         | ASP A 2  | 8890     | 7490     | 6360    | -590 2870 -770 O0  |
| ATOM   | 19           | H           | ASP A 2  | -21.837  | -17.199  | -9.027  | 1.00 59.57 H0      |
| ANISOU | 19           | H           | ASP A 2  | 8900     | 7370     | 6360    | -350 2690 -900 H0  |
| ATOM   | 20           | HA          | ASP A 2  | -20.048  | -17.942  | -7.033  | 1.00 58.06 H0      |
| ANISOU | 20           | HA          | ASP A 2  | 8350     | 7220     | 6490    | -250 2720 -930 H0  |
| ATOM   | 21           | HB2         | ASP A 2  | -19.277  | -15.777  | -6.988  | 1.00 58.65 H0      |
| ANISOU | 21           | HB2         | ASP A 2  | 8420     | 7370     | 6490    | -420 2790 -850 H0  |
| ATOM   | 22           | HB3         | ASP A 2  | -19.207  | -16.310  | -8.476  | 1.00 59.82 H0      |
| ANISOU | 22           | HB3         | ASP A 2  | 8680     | 7520     | 6530    | -420 2900 -920 H0  |
| ATOM   | 23           | N           | ARG A 3  | -21.253  | -16.531  | -5.105  | 1.00 53.46 N0      |
| ANISOU | 23           | N           | ARG A 3  | 7750     | 6610     | 5950    | -280 2480 -760 N0  |

|        |    |      |     |   |   |         |         |        |      |       |      |    |
|--------|----|------|-----|---|---|---------|---------|--------|------|-------|------|----|
| ATOM   | 24 | CA   | ARG | A | 3 | -22.092 | -16.379 | -3.885 | 1.00 | 51.20 | C0   |    |
| ANISOU | 24 | CA   | ARG | A | 3 | 7440    | 6290    | 5730   | -250 | 2330  | -690 | C0 |
| ATOM   | 25 | C    | ARG | A | 3 | -23.205 | -15.359 | -4.155 | 1.00 | 49.29 | C0   |    |
| ANISOU | 25 | C    | ARG | A | 3 | 7350    | 6010    | 5370   | -300 | 2260  | -630 | C0 |
| ATOM   | 26 | O    | ARG | A | 3 | -24.314 | -15.555 | -3.628 | 1.00 | 47.15 | O0   |    |
| ANISOU | 26 | O    | ARG | A | 3 | 7110    | 5710    | 5100   | -260 | 2130  | -590 | O0 |
| ATOM   | 27 | CB   | ARG | A | 3 | -21.200 | -16.023 | -2.693 | 1.00 | 51.57 | C0   |    |
| ANISOU | 27 | CB   | ARG | A | 3 | 7320    | 6390    | 5890   | -250 | 2330  | -670 | C0 |
| ATOM   | 28 | CG   | ARG | A | 3 | -20.248 | -17.146 | -2.306 | 1.00 | 53.16 | C0   |    |
| ANISOU | 28 | CG   | ARG | A | 3 | 7360    | 6640    | 6200   | -160 | 2370  | -730 | C0 |
| ATOM   | 29 | CD   | ARG | A | 3 | -19.456 | -16.873 | -1.042 | 1.00 | 53.90 | C0   |    |
| ANISOU | 29 | CD   | ARG | A | 3 | 7270    | 6810    | 6400   | -150 | 2340  | -700 | C0 |
| ATOM   | 30 | NE   | ARG | A | 3 | -18.720 | -18.048 | -0.588 | 1.00 | 55.04 | N0   |    |
| ANISOU | 30 | NE   | ARG | A | 3 | 7270    | 7000    | 6650   | -20  | 2360  | -730 | N0 |
| ATOM   | 31 | CZ   | ARG | A | 3 | -17.566 | -18.479 | -1.095 | 1.00 | 57.23 | C0   |    |
| ANISOU | 31 | CZ   | ARG | A | 3 | 7440    | 7350    | 6950   | 20   | 2490  | -800 | C0 |
| ATOM   | 32 | NH1  | ARG | A | 3 | -16.980 | -17.837 | -2.094 | 1.00 | 58.54 | N0   |    |
| ANISOU | 32 | NH1  | ARG | A | 3 | 7640    | 7560    | 7050   | -80  | 2610  | -850 | N0 |
| ATOM   | 33 | NH2  | ARG | A | 3 | -16.999 | -19.566 | -0.600 | 1.00 | 58.31 | N0   |    |
| ANISOU | 33 | NH2  | ARG | A | 3 | 7460    | 7510    | 7190   | 160  | 2490  | -810 | N0 |
| ATOM   | 34 | H    | ARG | A | 3 | -20.388 | -16.273 | -4.990 | 1.00 | 53.97 | H0   |    |
| ANISOU | 34 | H    | ARG | A | 3 | 7730    | 6720    | 6050   | -300 | 2550  | -780 | H0 |
| ATOM   | 35 | HA   | ARG | A | 3 | -22.515 | -17.249 | -3.702 | 1.00 | 50.90 | H0   |    |
| ANISOU | 35 | HA   | ARG | A | 3 | 7400    | 6220    | 5720   | -180 | 2280  | -710 | H0 |
| ATOM   | 36 | HB2  | ARG | A | 3 | -20.678 | -15.224 | -2.915 | 1.00 | 52.14 | H0   |    |
| ANISOU | 36 | HB2  | ARG | A | 3 | 7390    | 6500    | 5930   | -320 | 2390  | -670 | H0 |
| ATOM   | 37 | HB3  | ARG | A | 3 | -21.770 | -15.809 | -1.925 | 1.00 | 50.79 | H0   |    |
| ANISOU | 37 | HB3  | ARG | A | 3 | 7210    | 6270    | 5810   | -240 | 2230  | -630 | H0 |
| ATOM   | 38 | HG2  | ARG | A | 3 | -20.764 | -17.971 | -2.180 | 1.00 | 52.80 | H0   |    |
| ANISOU | 38 | HG2  | ARG | A | 3 | 7340    | 6540    | 6180   | -90  | 2320  | -730 | H0 |
| ATOM   | 39 | HG3  | ARG | A | 3 | -19.620 | -17.299 | -3.043 | 1.00 | 54.08 | H0   |    |
| ANISOU | 39 | HG3  | ARG | A | 3 | 7470    | 6780    | 6300   | -170 | 2470  | -780 | H0 |
| ATOM   | 40 | HD2  | ARG | A | 3 | -18.827 | -16.138 | -1.206 | 1.00 | 54.36 | H0   |    |
| ANISOU | 40 | HD2  | ARG | A | 3 | 7290    | 6930    | 6440   | -220 | 2410  | -720 | H0 |
| ATOM   | 41 | HD3  | ARG | A | 3 | -20.071 | -16.587 | -0.333 | 1.00 | 52.90 | H0   |    |
| ANISOU | 41 | HD3  | ARG | A | 3 | 7150    | 6660    | 6280   | -150 | 2250  | -660 | H0 |
| ATOM   | 42 | HE   | ARG | A | 3 | -19.065 | -18.509 | 0.067  | 1.00 | 54.66 | H0   |    |
| ANISOU | 42 | HE   | ARG | A | 3 | 7200    | 6920    | 6650   | 40   | 2290  | -710 | H0 |
| ATOM   | 43 | HH11 | ARG | A | 3 | -17.347 | -17.117 | -2.435 | 1.00 | 58.04 | H0   |    |
| ANISOU | 43 | HH11 | ARG | A | 3 | 7660    | 7470    | 6920   | -170 | 2610  | -830 | H0 |
| ATOM   | 44 | HH12 | ARG | A | 3 | -16.219 | -18.135 | -2.418 | 1.00 | 59.37 | H0   |    |
| ANISOU | 44 | HH12 | ARG | A | 3 | 7670    | 7720    | 7170   | -50  | 2690  | -890 | H0 |
| ATOM   | 45 | HH21 | ARG | A | 3 | -17.382 | -19.998 | 0.066  | 1.00 | 57.61 | H0   |    |
| ANISOU | 45 | HH21 | ARG | A | 3 | 7360    | 7390    | 7140   | 230  | 2420  | -780 | H0 |
| ATOM   | 46 | HH22 | ARG | A | 3 | -16.235 | -19.854 | -0.931 | 1.00 | 59.17 | H0   |    |
| ANISOU | 46 | HH22 | ARG | A | 3 | 7490    | 7670    | 7310   | 200  | 2570  | -860 | H0 |
| ATOM   | 47 | N    | ALA | A | 4 | -22.932 | -14.341 | -4.980 | 1.00 | 48.85 | N0   |    |
| ANISOU | 47 | N    | ALA | A | 4 | 7390    | 5970    | 5210   | -380 | 2340  | -610 | N0 |
| ATOM   | 48 | CA   | ALA | A | 4 | -23.889 | -13.270 | -5.349 | 1.00 | 47.71 | C0   |    |
| ANISOU | 48 | CA   | ALA | A | 4 | 7400    | 5790    | 4930   | -410 | 2290  | -530 | C0 |
| ATOM   | 49 | C    | ALA | A | 4 | -25.064 | -13.859 | -6.145 | 1.00 | 47.34 | C0   |    |
| ANISOU | 49 | C    | ALA | A | 4 | 7470    | 5730    | 4780   | -360 | 2220  | -540 | C0 |
| ATOM   | 50 | O    | ALA | A | 4 | -26.216 | -13.528 | -5.811 | 1.00 | 46.65 | O0   |    |
| ANISOU | 50 | O    | ALA | A | 4 | 7440    | 5630    | 4660   | -330 | 2100  | -480 | O0 |

|        |    |     |     |   |   |         |         |         |      |       |      |    |
|--------|----|-----|-----|---|---|---------|---------|---------|------|-------|------|----|
| ATOM   | 51 | CB  | ALA | A | 4 | -23.181 | -12.183 | -6.122  | 1.00 | 48.81 | C0   |    |
| ANISOU | 51 | CB  | ALA | A | 4 | 7630    | 5930    | 4980    | -510 | 2420  | -520 | C0 |
| ATOM   | 52 | H   | ALA | A | 4 | -22.119 | -14.226 | -5.375  | 1.00 | 49.71 | H0   |    |
| ANISOU | 52 | H   | ALA | A | 4 | 7470    | 6100    | 5310    | -420 | 2440  | -640 | H0 |
| ATOM   | 53 | HA  | ALA | A | 4 | -24.247 | -12.880 | -4.518  | 1.00 | 47.06 | H0   |    |
| ANISOU | 53 | HA  | ALA | A | 4 | 7300    | 5690    | 4900    | -400 | 2220  | -490 | H0 |
| ATOM   | 54 | HB1 | ALA | A | 4 | -23.808 | -11.469 | -6.327  | 1.00 | 48.77 | H0   |    |
| ANISOU | 54 | HB1 | ALA | A | 4 | 7740    | 5890    | 4900    | -510 | 2390  | -460 | H0 |
| ATOM   | 55 | HB2 | ALA | A | 4 | -22.451 | -11.828 | -5.588  | 1.00 | 48.92 | H0   |    |
| ANISOU | 55 | HB2 | ALA | A | 4 | 7570    | 5960    | 5070    | -550 | 2470  | -520 | H0 |
| ATOM   | 56 | HB3 | ALA | A | 4 | -22.828 | -12.550 | -6.950  | 1.00 | 49.61 | H0   |    |
| ANISOU | 56 | HB3 | ALA | A | 4 | 7760    | 6050    | 5040    | -520 | 2500  | -560 | H0 |
| ATOM   | 57 | N   | ASP | A | 5 | -24.791 | -14.702 | -7.150  | 1.00 | 48.07 | N0   |    |
| ANISOU | 57 | N   | ASP | A | 5 | 7590    | 5850    | 4830    | -360 | 2300  | -620 | N0 |
| ATOM   | 58 | CA  | ASP | A | 5 | -25.831 | -15.312 | -8.027  | 1.00 | 48.04 | C0   |    |
| ANISOU | 58 | CA  | ASP | A | 5 | 7690    | 5860    | 4700    | -340 | 2240  | -650 | C0 |
| ATOM   | 59 | C   | ASP | A | 5 | -26.764 | -16.180 | -7.175  | 1.00 | 46.08 | C0   |    |
| ANISOU | 59 | C   | ASP | A | 5 | 7380    | 5590    | 4530    | -280 | 2110  | -660 | C0 |
| ATOM   | 60 | O   | ASP | A | 5 | -27.986 | -16.121 | -7.391  | 1.00 | 45.51 | O0   |    |
| ANISOU | 60 | O   | ASP | A | 5 | 7380    | 5540    | 4370    | -270 | 2010  | -640 | O0 |
| ATOM   | 61 | CB  | ASP | A | 5 | -25.214 | -16.139 | -9.159  | 1.00 | 50.10 | C0   |    |
| ANISOU | 61 | CB  | ASP | A | 5 | 7980    | 6140    | 4910    | -350 | 2360  | -750 | C0 |
| ATOM   | 62 | CG  | ASP | A | 5 | -24.544 | -15.321 | -10.251 | 1.00 | 51.77 | C0   |    |
| ANISOU | 62 | CG  | ASP | A | 5 | 8290    | 6380    | 5000    | -420 | 2490  | -740 | C0 |
| ATOM   | 63 | OD1 | ASP | A | 5 | -24.738 | -14.079 | -10.276 | 1.00 | 52.10 | O0   |    |
| ANISOU | 63 | OD1 | ASP | A | 5 | 8410    | 6420    | 4970    | -450 | 2480  | -640 | O0 |
| ATOM   | 64 | OD2 | ASP | A | 5 | -23.826 | -15.935 | -11.067 | 1.00 | 53.27 | O0   |    |
| ANISOU | 64 | OD2 | ASP | A | 5 | 8480    | 6600    | 5170    | -440 | 2610  | -820 | O0 |
| ATOM   | 65 | H   | ASP | A | 5 | -23.941 | -14.952 | -7.361  | 1.00 | 48.64 | H0   |    |
| ANISOU | 65 | H   | ASP | A | 5 | 7610    | 5930    | 4930    | -380 | 2390  | -660 | H0 |
| ATOM   | 66 | HA  | ASP | A | 5 | -26.362 | -14.585 | -8.427  | 1.00 | 48.22 | H0   |    |
| ANISOU | 66 | HA  | ASP | A | 5 | 7810    | 5890    | 4620    | -350 | 2210  | -590 | H0 |
| ATOM   | 67 | HB2 | ASP | A | 5 | -24.547 | -16.746 | -8.780  | 1.00 | 50.02 | H0   |    |
| ANISOU | 67 | HB2 | ASP | A | 5 | 7880    | 6120    | 5010    | -340 | 2410  | -790 | H0 |
| ATOM   | 68 | HB3 | ASP | A | 5 | -25.917 | -16.681 | -9.573  | 1.00 | 50.12 | H0   |    |
| ANISOU | 68 | HB3 | ASP | A | 5 | 8030    | 6150    | 4860    | -340 | 2320  | -780 | H0 |
| ATOM   | 69 | N   | ILE | A | 6 | -26.204 | -16.937 | -6.230  | 1.00 | 45.38 | N0   |    |
| ANISOU | 69 | N   | ILE | A | 6 | 7160    | 5470    | 4610    | -250 | 2110  | -690 | N0 |
| ATOM   | 70 | CA  | ILE | A | 6 | -26.969 | -17.814 | -5.288  | 1.00 | 44.37 | C0   |    |
| ANISOU | 70 | CA  | ILE | A | 6 | 6980    | 5310    | 4570    | -200 | 2010  | -700 | C0 |
| ATOM   | 71 | C   | ILE | A | 6 | -27.912 | -16.940 | -4.452  | 1.00 | 43.27 | C0   |    |
| ANISOU | 71 | C   | ILE | A | 6 | 6840    | 5180    | 4420    | -190 | 1880  | -610 | C0 |
| ATOM   | 72 | O   | ILE | A | 6 | -29.106 | -17.293 | -4.329  | 1.00 | 42.94 | O0   |    |
| ANISOU | 72 | O   | ILE | A | 6 | 6830    | 5150    | 4340    | -180 | 1770  | -610 | O0 |
| ATOM   | 73 | CB  | ILE | A | 6 | -26.009 | -18.655 | -4.421  | 1.00 | 44.16 | C0   |    |
| ANISOU | 73 | CB  | ILE | A | 6 | 6820    | 5250    | 4710    | -150 | 2050  | -730 | C0 |
| ATOM   | 74 | CG1 | ILE | A | 6 | -25.202 | -19.637 | -5.278  | 1.00 | 45.32 | C0   |    |
| ANISOU | 74 | CG1 | ILE | A | 6 | 6970    | 5380    | 4860    | -130 | 2180  | -820 | C0 |
| ATOM   | 75 | CG2 | ILE | A | 6 | -26.766 | -19.372 | -3.311  | 1.00 | 43.54 | C0   |    |
| ANISOU | 75 | CG2 | ILE | A | 6 | 6690    | 5130    | 4720    | -100 | 1940  | -710 | C0 |
| ATOM   | 76 | CD1 | ILE | A | 6 | -23.916 | -20.104 | -4.644  | 1.00 | 45.65 | C0   |    |
| ANISOU | 76 | CD1 | ILE | A | 6 | 6880    | 5420    | 5050    | -70  | 2260  | -840 | C0 |
| ATOM   | 77 | H   | ILE | A | 6 | -25.304 | -16.960 | -6.096  | 1.00 | 45.71 | H0   |    |
| ANISOU | 77 | H   | ILE | A | 6 | 7140    | 5520    | 4710    | -250 | 2190  | -710 | H0 |



|        |     |      |     |   |   |         |         |        |      |       |      |    |
|--------|-----|------|-----|---|---|---------|---------|--------|------|-------|------|----|
| ATOM   | 78  | HA   | ILE | A | 6 | -27.510 | -18.426 | -5.818 | 1.00 | 44.68 | H0   |    |
| ANISOU | 78  | HA   | ILE | A | 6 | 7070    | 5350    | 4550   | -200 | 1990  | -740 | H0 |
| ATOM   | 79  | HB   | ILE | A | 6 | -25.367 | -18.033 | -3.995 | 1.00 | 44.11 | H0   |    |
| ANISOU | 79  | HB   | ILE | A | 6 | 6750    | 5260    | 4740   | -150 | 2070  | -690 | H0 |
| ATOM   | 80  | HG12 | ILE | A | 6 | -25.762 | -20.421 | -5.465 | 1.00 | 45.45 | H0   |    |
| ANISOU | 80  | HG12 | ILE | A | 6 | 7030    | 5370    | 4870   | -120 | 2160  | -870 | H0 |
| ATOM   | 81  | HG13 | ILE | A | 6 | -24.991 | -19.210 | -6.135 | 1.00 | 45.94 | H0   |    |
| ANISOU | 81  | HG13 | ILE | A | 6 | 7110    | 5490    | 4850   | -170 | 2240  | -840 | H0 |
| ATOM   | 82  | HG21 | ILE | A | 6 | -27.051 | -18.728 | -2.640 | 1.00 | 42.71 | H0   |    |
| ANISOU | 82  | HG21 | ILE | A | 6 | 6560    | 5040    | 4630   | -110 | 1870  | -650 | H0 |
| ATOM   | 83  | HG22 | ILE | A | 6 | -26.186 | -20.033 | -2.895 | 1.00 | 43.63 | H0   |    |
| ANISOU | 83  | HG22 | ILE | A | 6 | 6640    | 5120    | 4820   | -60  | 1980  | -730 | H0 |
| ATOM   | 84  | HG23 | ILE | A | 6 | -27.546 | -19.817 | -3.684 | 1.00 | 43.52 | H0   |    |
| ANISOU | 84  | HG23 | ILE | A | 6 | 6750    | 5120    | 4660   | -110 | 1910  | -740 | H0 |
| ATOM   | 85  | HD11 | ILE | A | 6 | -23.356 | -19.335 | -4.437 | 1.00 | 45.64 | H0   |    |
| ANISOU | 85  | HD11 | ILE | A | 6 | 6820    | 5470    | 5050   | -90  | 2280  | -810 | H0 |
| ATOM   | 86  | HD12 | ILE | A | 6 | -23.443 | -20.691 | -5.259 | 1.00 | 46.57 | H0   |    |
| ANISOU | 86  | HD12 | ILE | A | 6 | 7000    | 5530    | 5160   | -50  | 2340  | -900 | H0 |
| ATOM   | 87  | HD13 | ILE | A | 6 | -24.113 | -20.589 | -3.824 | 1.00 | 45.19 | H0   |    |
| ANISOU | 87  | HD13 | ILE | A | 6 | 6770    | 5330    | 5070   | -20  | 2200  | -820 | H0 |
| ATOM   | 88  | N    | LEU | A | 7 | -27.409 | -15.828 | -3.913 | 1.00 | 43.09 | N0   |    |
| ANISOU | 88  | N    | LEU | A | 7 | 6790    | 5160    | 4430   | -210 | 1890  | -540 | N0 |
| ATOM   | 89  | CA   | LEU | A | 7 | -28.217 | -14.880 | -3.104 | 1.00 | 42.08 | C0   |    |
| ANISOU | 89  | CA   | LEU | A | 7 | 6670    | 5030    | 4290   | -200 | 1780  | -460 | C0 |
| ATOM   | 90  | C    | LEU | A | 7 | -29.333 | -14.279 | -3.968 | 1.00 | 42.81 | C0   |    |
| ANISOU | 90  | C    | LEU | A | 7 | 6900    | 5150    | 4220   | -190 | 1730  | -420 | C0 |
| ATOM   | 91  | O    | LEU | A | 7 | -30.486 | -14.202 | -3.489 | 1.00 | 42.04 | O0   |    |
| ANISOU | 91  | O    | LEU | A | 7 | 6800    | 5070    | 4100   | -160 | 1610  | -390 | O0 |
| ATOM   | 92  | CB   | LEU | A | 7 | -27.310 | -13.781 | -2.546 | 1.00 | 42.08 | C0   |    |
| ANISOU | 92  | CB   | LEU | A | 7 | 6640    | 5020    | 4340   | -240 | 1840  | -410 | C0 |
| ATOM   | 93  | CG   | LEU | A | 7 | -28.037 | -12.698 | -1.756 | 1.00 | 41.53 | C0   |    |
| ANISOU | 93  | CG   | LEU | A | 7 | 6600    | 4930    | 4260   | -230 | 1760  | -340 | C0 |
| ATOM   | 94  | CD1  | LEU | A | 7 | -28.891 | -13.319 | -0.661 | 1.00 | 40.72 | C0   |    |
| ANISOU | 94  | CD1  | LEU | A | 7 | 6410    | 4830    | 4230   | -180 | 1630  | -330 | C0 |
| ATOM   | 95  | CD2  | LEU | A | 7 | -27.052 | -11.696 | -1.178 | 1.00 | 42.06 | C0   |    |
| ANISOU | 95  | CD2  | LEU | A | 7 | 6630    | 4980    | 4370   | -290 | 1830  | -310 | C0 |
| ATOM   | 96  | H    | LEU | A | 7 | -26.535 | -15.588 | -4.006 | 1.00 | 43.44 | H0   |    |
| ANISOU | 96  | H    | LEU | A | 7 | 6800    | 5210    | 4490   | -230 | 1970  | -550 | H0 |
| ATOM   | 97  | HA   | LEU | A | 7 | -28.626 | -15.379 | -2.361 | 1.00 | 41.55 | H0   |    |
| ANISOU | 97  | HA   | LEU | A | 7 | 6550    | 4950    | 4290   | -170 | 1720  | -460 | H0 |
| ATOM   | 98  | HB2  | LEU | A | 7 | -26.641 | -14.196 | -1.966 | 1.00 | 41.99 | H0   |    |
| ANISOU | 98  | HB2  | LEU | A | 7 | 6520    | 5010    | 4420   | -240 | 1860  | -440 | H0 |
| ATOM   | 99  | HB3  | LEU | A | 7 | -26.837 | -13.360 | -3.291 | 1.00 | 42.85 | H0   |    |
| ANISOU | 99  | HB3  | LEU | A | 7 | 6790    | 5120    | 4370   | -270 | 1920  | -420 | H0 |
| ATOM   | 100 | HG   | LEU | A | 7 | -28.636 | -12.214 | -2.375 | 1.00 | 41.91 | H0   |    |
| ANISOU | 100 | HG   | LEU | A | 7 | 6750    | 4970    | 4200   | -220 | 1740  | -300 | H0 |
| ATOM   | 101 | HD11 | LEU | A | 7 | -29.703 | -13.687 | -1.049 | 1.00 | 40.62 | H0   |    |
| ANISOU | 101 | HD11 | LEU | A | 7 | 6440    | 4830    | 4160   | -160 | 1580  | -340 | H0 |
| ATOM   | 102 | HD12 | LEU | A | 7 | -29.126 | -12.639 | -0.006 | 1.00 | 40.23 | H0   |    |
| ANISOU | 102 | HD12 | LEU | A | 7 | 6350    | 4760    | 4180   | -180 | 1590  | -290 | H0 |
| ATOM   | 103 | HD13 | LEU | A | 7 | -28.391 | -14.030 | -0.223 | 1.00 | 40.50 | H0   |    |
| ANISOU | 103 | HD13 | LEU | A | 7 | 6300    | 4800    | 4290   | -180 | 1640  | -360 | H0 |
| ATOM   | 104 | HD21 | LEU | A | 7 | -26.381 | -12.165 | -0.654 | 1.00 | 41.88 | H0   |    |
| ANISOU | 104 | HD21 | LEU | A | 7 | 6500    | 4980    | 4440   | -300 | 1850  | -350 | H0 |

|        |     |      |     |   |   |         |         |        |      |       |      |    |
|--------|-----|------|-----|---|---|---------|---------|--------|------|-------|------|----|
| ATOM   | 105 | HD22 | LEU | A | 7 | -27.525 | -11.065 | -0.609 | 1.00 | 41.53 | H0   |    |
| ANISOU | 105 | HD22 | LEU | A | 7 | 6580    | 4890    | 4310   | -290 | 1780  | -270 | H0 |
| ATOM   | 106 | HD23 | LEU | A | 7 | -26.616 | -11.215 | -1.903 | 1.00 | 42.71 | H0   |    |
| ANISOU | 106 | HD23 | LEU | A | 7 | 6780    | 5050    | 4400   | -340 | 1910  | -310 | H0 |
| ATOM   | 107 | N    | TYR | A | 8 | -29.012 | -13.863 | -5.195 | 1.00 | 44.65 | N0   |    |
| ANISOU | 107 | N    | TYR | A | 8 | 7240    | 5400    | 4330   | -220 | 1820  | -430 | N0 |
| ATOM   | 108 | CA   | TYR | A | 8 | -29.973 | -13.182 | -6.102 | 1.00 | 45.83 | C0   |    |
| ANISOU | 108 | CA   | TYR | A | 8 | 7520    | 5580    | 4300   | -200 | 1770  | -370 | C0 |
| ATOM   | 109 | C    | TYR | A | 8 | -31.059 | -14.179 | -6.520 | 1.00 | 46.14 | C0   |    |
| ANISOU | 109 | C    | TYR | A | 8 | 7560    | 5690    | 4280   | -180 | 1680  | -430 | C0 |
| ATOM   | 110 | O    | TYR | A | 8 | -32.229 | -13.769 | -6.628 | 1.00 | 46.30 | O0   |    |
| ANISOU | 110 | O    | TYR | A | 8 | 7630    | 5760    | 4200   | -140 | 1580  | -380 | O0 |
| ATOM   | 111 | CB   | TYR | A | 8 | -29.247 | -12.513 | -7.274 | 1.00 | 47.44 | C0   |    |
| ANISOU | 111 | CB   | TYR | A | 8 | 7850    | 5790    | 4390   | -240 | 1900  | -360 | C0 |
| ATOM   | 112 | CG   | TYR | A | 8 | -28.175 | -11.521 | -6.884 | 1.00 | 47.99 | C0   |    |
| ANISOU | 112 | CG   | TYR | A | 8 | 7920    | 5800    | 4520   | -300 | 2000  | -320 | C0 |
| ATOM   | 113 | CD1  | TYR | A | 8 | -28.169 | -10.897 | -5.642 | 1.00 | 47.39 | C0   |    |
| ANISOU | 113 | CD1  | TYR | A | 8 | 7780    | 5670    | 4550   | -290 | 1960  | -270 | C0 |
| ATOM   | 114 | CD2  | TYR | A | 8 | -27.164 | -11.187 | -7.771 | 1.00 | 49.75 | C0   |    |
| ANISOU | 114 | CD2  | TYR | A | 8 | 8200    | 6010    | 4690   | -360 | 2150  | -330 | C0 |
| ATOM   | 115 | CE1  | TYR | A | 8 | -27.181 | -9.992  | -5.287 | 1.00 | 47.82 | C0   |    |
| ANISOU | 115 | CE1  | TYR | A | 8 | 7840    | 5680    | 4650   | -360 | 2060  | -250 | C0 |
| ATOM   | 116 | CE2  | TYR | A | 8 | -26.174 | -10.276 | -7.436 | 1.00 | 50.41 | C0   |    |
| ANISOU | 116 | CE2  | TYR | A | 8 | 8280    | 6050    | 4820   | -430 | 2250  | -300 | C0 |
| ATOM   | 117 | CZ   | TYR | A | 8 | -26.182 | -9.676  | -6.189 | 1.00 | 49.62 | C0   |    |
| ANISOU | 117 | CZ   | TYR | A | 8 | 8120    | 5910    | 4820   | -440 | 2210  | -270 | C0 |
| ATOM   | 118 | OH   | TYR | A | 8 | -25.209 | -8.777  | -5.860 | 1.00 | 51.16 | O0   |    |
| ANISOU | 118 | OH   | TYR | A | 8 | 8320    | 6060    | 5060   | -530 | 2310  | -250 | O0 |
| ATOM   | 119 | H    | TYR | A | 8 | -28.188 | -13.972 | -5.567 | 1.00 | 45.13 | H0   |    |
| ANISOU | 119 | H    | TYR | A | 8 | 7290    | 5450    | 4400   | -250 | 1910  | -460 | H0 |
| ATOM   | 120 | HA   | TYR | A | 8 | -30.420 | -12.468 | -5.581 | 1.00 | 45.41 | H0   |    |
| ANISOU | 120 | HA   | TYR | A | 8 | 7480    | 5520    | 4250   | -180 | 1720  | -310 | H0 |
| ATOM   | 121 | HB2  | TYR | A | 8 | -28.840 | -13.215 | -7.824 | 1.00 | 47.93 | H0   |    |
| ANISOU | 121 | HB2  | TYR | A | 8 | 7900    | 5870    | 4450   | -270 | 1950  | -430 | H0 |
| ATOM   | 122 | HB3  | TYR | A | 8 | -29.913 | -12.054 | -7.824 | 1.00 | 47.90 | H0   |    |
| ANISOU | 122 | HB3  | TYR | A | 8 | 8000    | 5870    | 4330   | -220 | 1860  | -320 | H0 |
| ATOM   | 123 | HD1  | TYR | A | 8 | -28.841 | -11.105 | -5.017 | 1.00 | 46.63 | H0   |    |
| ANISOU | 123 | HD1  | TYR | A | 8 | 7640    | 5580    | 4490   | -250 | 1860  | -260 | H0 |
| ATOM   | 124 | HD2  | TYR | A | 8 | -27.147 | -11.591 | -8.623 | 1.00 | 50.36 | H0   |    |
| ANISOU | 124 | HD2  | TYR | A | 8 | 8320    | 6130    | 4690   | -370 | 2180  | -370 | H0 |
| ATOM   | 125 | HE1  | TYR | A | 8 | -27.196 | -9.583  | -4.438 | 1.00 | 47.40 | H0   |    |
| ANISOU | 125 | HE1  | TYR | A | 8 | 7740    | 5600    | 4660   | -360 | 2030  | -220 | H0 |
| ATOM   | 126 | HE2  | TYR | A | 8 | -25.494 | -10.067 | -8.055 | 1.00 | 51.19 | H0   |    |
| ANISOU | 126 | HE2  | TYR | A | 8 | 8420    | 6150    | 4870   | -490 | 2360  | -320 | H0 |
| ATOM   | 127 | N    | ASN | A | 9 | -30.705 | -15.454 | -6.704 | 1.00 | 46.86 | N0   |    |
| ANISOU | 127 | N    | ASN | A | 9 | 7600    | 5780    | 4420   | -210 | 1720  | -530 | N0 |
| ATOM   | 128 | CA   | ASN | A | 9 | -31.693 | -16.521 | -7.018 | 1.00 | 47.67 | C0   |    |
| ANISOU | 128 | CA   | ASN | A | 9 | 7700    | 5930    | 4480   | -210 | 1650  | -610 | C0 |
| ATOM   | 129 | C    | ASN | A | 9 | -32.634 | -16.699 | -5.821 | 1.00 | 46.90 | C0   |    |
| ANISOU | 129 | C    | ASN | A | 9 | 7530    | 5830    | 4460   | -180 | 1520  | -580 | C0 |
| ATOM   | 130 | O    | ASN | A | 9 | -33.840 | -16.896 | -6.043 | 1.00 | 47.50 | O0   |    |
| ANISOU | 130 | O    | ASN | A | 9 | 7620    | 5990    | 4450   | -180 | 1430  | -600 | O0 |
| ATOM   | 131 | CB   | ASN | A | 9 | -31.040 | -17.854 | -7.385 | 1.00 | 48.32 | C0   |    |
| ANISOU | 131 | CB   | ASN | A | 9 | 7770    | 5970    | 4620   | -250 | 1740  | -720 | C0 |

|        |     |      |     |   |    |         |         |        |      |       |      |    |
|--------|-----|------|-----|---|----|---------|---------|--------|------|-------|------|----|
| ATOM   | 132 | CG   | ASN | A | 9  | -32.073 | -18.918 | -7.689 | 1.00 | 48.97 | C0   |    |
| ANISOU | 132 | CG   | ASN | A | 9  | 7860    | 6100    | 4650   | -270 | 1680  | -810 | C0 |
| ATOM   | 133 | OD1  | ASN | A | 9  | -32.247 | -19.857 | -6.921 | 1.00 | 49.30 | O0   |    |
| ANISOU | 133 | OD1  | ASN | A | 9  | 7840    | 6080    | 4800   | -280 | 1660  | -850 | O0 |
| ATOM   | 134 | ND2  | ASN | A | 9  | -32.800 | -18.754 | -8.781 | 1.00 | 50.73 | N0   |    |
| ANISOU | 134 | ND2  | ASN | A | 9  | 8170    | 6420    | 4690   | -300 | 1650  | -830 | N0 |
| ATOM   | 135 | H    | ASN | A | 9  | -29.843 | -15.744 | -6.658 | 1.00 | 46.99 | H0   |    |
| ANISOU | 135 | H    | ASN | A | 9  | 7590    | 5760    | 4510   | -220 | 1800  | -560 | H0 |
| ATOM   | 136 | HA   | ASN | A | 9  | -32.226 | -16.226 | -7.793 | 1.00 | 48.27 | H0   |    |
| ANISOU | 136 | HA   | ASN | A | 9  | 7850    | 6070    | 4420   | -210 | 1630  | -600 | H0 |
| ATOM   | 137 | HB2  | ASN | A | 9  | -30.467 | -17.726 | -8.168 | 1.00 | 49.12 | H0   |    |
| ANISOU | 137 | HB2  | ASN | A | 9  | 7920    | 6080    | 4660   | -260 | 1820  | -740 | H0 |
| ATOM   | 138 | HB3  | ASN | A | 9  | -30.479 | -18.152 | -6.640 | 1.00 | 47.86 | H0   |    |
| ANISOU | 138 | HB3  | ASN | A | 9  | 7640    | 5860    | 4690   | -230 | 1770  | -720 | H0 |
| ATOM   | 139 | HD21 | ASN | A | 9  | -33.408 | -19.356 | -9.002 | 1.00 | 50.82 | H0   |    |
| ANISOU | 139 | HD21 | ASN | A | 9  | 8180    | 6470    | 4660   | -330 | 1610  | -890 | H0 |
| ATOM   | 140 | HD22 | ASN | A | 9  | -32.678 | -18.042 | -9.291 | 1.00 | 50.83 | H0   |    |
| ANISOU | 140 | HD22 | ASN | A | 9  | 8230    | 6470    | 4610   | -290 | 1660  | -790 | H0 |
| ATOM   | 141 | N    | ILE | A | 10 | -32.098 | -16.652 | -4.602 | 1.00 | 46.06 | N0   |    |
| ANISOU | 141 | N    | ILE | A | 10 | 7330    | 5660    | 4510   | -170 | 1530  | -550 | N0 |
| ATOM   | 142 | CA   | ILE | A | 10 | -32.894 | -16.771 | -3.345 | 1.00 | 46.20 | C0   |    |
| ANISOU | 142 | CA   | ILE | A | 10 | 7270    | 5670    | 4610   | -140 | 1420  | -520 | C0 |
| ATOM   | 143 | C    | ILE | A | 10 | -33.845 | -15.570 | -3.238 | 1.00 | 46.52 | C0   |    |
| ANISOU | 143 | C    | ILE | A | 10 | 7350    | 5770    | 4560   | -100 | 1330  | -430 | C0 |
| ATOM   | 144 | O    | ILE | A | 10 | -35.011 | -15.784 | -2.869 | 1.00 | 46.79 | O0   |    |
| ANISOU | 144 | O    | ILE | A | 10 | 7350    | 5860    | 4570   | -90  | 1220  | -430 | O0 |
| ATOM   | 145 | CB   | ILE | A | 10 | -31.969 | -16.929 | -2.118 | 1.00 | 45.05 | C0   |    |
| ANISOU | 145 | CB   | ILE | A | 10 | 7030    | 5450    | 4640   | -130 | 1450  | -500 | C0 |
| ATOM   | 146 | CG1  | ILE | A | 10 | -31.312 | -18.312 | -2.107 | 1.00 | 44.91 | C0   |    |
| ANISOU | 146 | CG1  | ILE | A | 10 | 6970    | 5380    | 4710   | -140 | 1520  | -580 | C0 |
| ATOM   | 147 | CG2  | ILE | A | 10 | -32.717 | -16.652 | -0.824 | 1.00 | 44.20 | C0   |    |
| ANISOU | 147 | CG2  | ILE | A | 10 | 6850    | 5350    | 4590   | -110 | 1340  | -440 | C0 |
| ATOM   | 148 | CD1  | ILE | A | 10 | -30.096 | -18.416 | -1.217 | 1.00 | 44.70 | C0   |    |
| ANISOU | 148 | CD1  | ILE | A | 10 | 6850    | 5300    | 4830   | -110 | 1570  | -560 | C0 |
| ATOM   | 149 | H    | ILE | A | 10 | -31.204 | -16.551 | -4.461 | 1.00 | 46.30 | H0   |    |
| ANISOU | 149 | H    | ILE | A | 10 | 7340    | 5650    | 4610   | -170 | 1600  | -540 | H0 |
| ATOM   | 150 | HA   | ILE | A | 10 | -33.437 | -17.577 | -3.413 | 1.00 | 46.13 | H0   |    |
| ANISOU | 150 | HA   | ILE | A | 10 | 7250    | 5680    | 4600   | -160 | 1390  | -570 | H0 |
| ATOM   | 151 | HB   | ILE | A | 10 | -31.249 | -16.257 | -2.197 | 1.00 | 45.15 | H0   |    |
| ANISOU | 151 | HB   | ILE | A | 10 | 7050    | 5450    | 4660   | -130 | 1500  | -470 | H0 |
| ATOM   | 152 | HG12 | ILE | A | 10 | -31.973 | -18.970 | -1.810 | 1.00 | 44.87 | H0   |    |
| ANISOU | 152 | HG12 | ILE | A | 10 | 6950    | 5370    | 4720   | -140 | 1470  | -600 | H0 |
| ATOM   | 153 | HG13 | ILE | A | 10 | -31.050 | -18.543 | -3.023 | 1.00 | 45.78 | H0   |    |
| ANISOU | 153 | HG13 | ILE | A | 10 | 7130    | 5500    | 4770   | -160 | 1580  | -620 | H0 |
| ATOM   | 154 | HG21 | ILE | A | 10 | -32.832 | -15.692 | -0.710 | 1.00 | 43.97 | H0   |    |
| ANISOU | 154 | HG21 | ILE | A | 10 | 6850    | 5330    | 4530   | -90  | 1320  | -390 | H0 |
| ATOM   | 155 | HG22 | ILE | A | 10 | -32.212 | -17.005 | -0.071 | 1.00 | 43.77 | H0   |    |
| ANISOU | 155 | HG22 | ILE | A | 10 | 6740    | 5250    | 4640   | -100 | 1360  | -440 | H0 |
| ATOM   | 156 | HG23 | ILE | A | 10 | -33.591 | -17.080 | -0.853 | 1.00 | 44.14 | H0   |    |
| ANISOU | 156 | HG23 | ILE | A | 10 | 6850    | 5370    | 4550   | -110 | 1280  | -470 | H0 |
| ATOM   | 157 | HD11 | ILE | A | 10 | -29.483 | -17.688 | -1.416 | 1.00 | 44.83 | H0   |    |
| ANISOU | 157 | HD11 | ILE | A | 10 | 6870    | 5330    | 4830   | -120 | 1620  | -530 | H0 |
| ATOM   | 158 | HD12 | ILE | A | 10 | -29.650 | -19.266 | -1.375 | 1.00 | 45.12 | H0   |    |
| ANISOU | 158 | HD12 | ILE | A | 10 | 6890    | 5330    | 4930   | -100 | 1630  | -610 | H0 |

|        |     |      |     |   |    |         |         |        |      |       |      |    |
|--------|-----|------|-----|---|----|---------|---------|--------|------|-------|------|----|
| ATOM   | 159 | HD13 | ILE | A | 10 | -30.369 | -18.364 | -0.284 | 1.00 | 44.01 | H0   |    |
| ANISOU | 159 | HD13 | ILE | A | 10 | 6710    | 5210    | 4800   | -90  | 1510  | -520 | H0 |
| ATOM   | 160 | N    | ARG | A | 11 | -33.384 | -14.366 | -3.586 | 1.00 | 48.14 | N0   |    |
| ANISOU | 160 | N    | ARG | A | 11 | 7620    | 5960    | 4710   | -90  | 1370  | -360 | N0 |
| ATOM   | 161 | CA   | ARG | A | 11 | -34.163 | -13.104 | -3.447 | 1.00 | 49.23 | C0   |    |
| ANISOU | 161 | CA   | ARG | A | 11 | 7810    | 6120    | 4770   | -30  | 1310  | -270 | C0 |
| ATOM   | 162 | C    | ARG | A | 11 | -35.312 | -13.043 | -4.464 | 1.00 | 51.26 | C0   |    |
| ANISOU | 162 | C    | ARG | A | 11 | 8140    | 6490    | 4850   | 10   | 1230  | -270 | C0 |
| ATOM   | 163 | O    | ARG | A | 11 | -36.320 | -12.388 | -4.152 | 1.00 | 52.57 | O0   |    |
| ANISOU | 163 | O    | ARG | A | 11 | 8310    | 6710    | 4960   | 80   | 1140  | -210 | O0 |
| ATOM   | 164 | CB   | ARG | A | 11 | -33.250 | -11.885 | -3.598 | 1.00 | 49.86 | C0   |    |
| ANISOU | 164 | CB   | ARG | A | 11 | 7970    | 6130    | 4840   | -30  | 1400  | -200 | C0 |
| ATOM   | 165 | CG   | ARG | A | 11 | -32.394 | -11.628 | -2.370 | 1.00 | 49.59 | C0   |    |
| ANISOU | 165 | CG   | ARG | A | 11 | 7860    | 6020    | 4960   | -60  | 1440  | -190 | C0 |
| ATOM   | 166 | CD   | ARG | A | 11 | -31.703 | -10.283 | -2.366 | 1.00 | 50.65 | C0   |    |
| ANISOU | 166 | CD   | ARG | A | 11 | 8080    | 6090    | 5080   | -80  | 1520  | -130 | C0 |
| ATOM   | 167 | NE   | ARG | A | 11 | -31.101 | -10.061 | -1.057 | 1.00 | 50.96 | N0   |    |
| ANISOU | 167 | NE   | ARG | A | 11 | 8020    | 6080    | 5260   | -120 | 1530  | -130 | N0 |
| ATOM   | 168 | CZ   | ARG | A | 11 | -30.119 | -9.206  | -0.801 | 1.00 | 51.56 | C0   |    |
| ANISOU | 168 | CZ   | ARG | A | 11 | 8110    | 6100    | 5370   | -180 | 1630  | -120 | C0 |
| ATOM   | 169 | NH1  | ARG | A | 11 | -29.606 | -8.457  | -1.765 | 1.00 | 52.53 | N0   |    |
| ANISOU | 169 | NH1  | ARG | A | 11 | 8360    | 6190    | 5400   | -220 | 1730  | -90  | N0 |
| ATOM   | 170 | NH2  | ARG | A | 11 | -29.647 | -9.110  | 0.428  | 1.00 | 50.97 | N0   |    |
| ANISOU | 170 | NH2  | ARG | A | 11 | 7930    | 6010    | 5420   | -220 | 1620  | -130 | N0 |
| ATOM   | 171 | H    | ARG | A | 11 | -32.549 | -14.245 | -3.929 | 1.00 | 48.41 | H0   |    |
| ANISOU | 171 | H    | ARG | A | 11 | 7680    | 5960    | 4750   | -110 | 1450  | -370 | H0 |
| ATOM   | 172 | HA   | ARG | A | 11 | -34.554 | -13.089 | -2.543 | 1.00 | 48.57 | H0   |    |
| ANISOU | 172 | HA   | ARG | A | 11 | 7670    | 6030    | 4750   | -10  | 1250  | -250 | H0 |
| ATOM   | 173 | HB2  | ARG | A | 11 | -32.665 | -12.020 | -4.372 | 1.00 | 50.56 | H0   |    |
| ANISOU | 173 | HB2  | ARG | A | 11 | 8110    | 6220    | 4880   | -60  | 1480  | -230 | H0 |
| ATOM   | 174 | HB3  | ARG | A | 11 | -33.804 | -11.095 | -3.770 | 1.00 | 50.23 | H0   |    |
| ANISOU | 174 | HB3  | ARG | A | 11 | 8090    | 6190    | 4800   | 10   | 1370  | -140 | H0 |
| ATOM   | 175 | HG2  | ARG | A | 11 | -32.960 | -11.690 | -1.571 | 1.00 | 48.95 | H0   |    |
| ANISOU | 175 | HG2  | ARG | A | 11 | 7720    | 5950    | 4930   | -40  | 1360  | -180 | H0 |
| ATOM   | 176 | HG3  | ARG | A | 11 | -31.713 | -12.329 | -2.304 | 1.00 | 49.50 | H0   |    |
| ANISOU | 176 | HG3  | ARG | A | 11 | 7790    | 6000    | 5020   | -100 | 1480  | -250 | H0 |
| ATOM   | 177 | HD2  | ARG | A | 11 | -31.011 | -10.267 | -3.060 | 1.00 | 51.40 | H0   |    |
| ANISOU | 177 | HD2  | ARG | A | 11 | 8210    | 6170    | 5140   | -120 | 1610  | -150 | H0 |
| ATOM   | 178 | HD3  | ARG | A | 11 | -32.353 | -9.574  | -2.558 | 1.00 | 51.04 | H0   |    |
| ANISOU | 178 | HD3  | ARG | A | 11 | 8210    | 6140    | 5050   | -40  | 1490  | -70  | H0 |
| ATOM   | 179 | HE   | ARG | A | 11 | -31.400 | -10.537 | -0.390 | 1.00 | 50.14 | H0   |    |
| ANISOU | 179 | HE   | ARG | A | 11 | 7840    | 6000    | 5220   | -100 | 1470  | -150 | H0 |
| ATOM   | 180 | HH11 | ARG | A | 11 | -29.912 | -8.517  | -2.585 | 1.00 | 53.03 | H0   |    |
| ANISOU | 180 | HH11 | ARG | A | 11 | 8500    | 6270    | 5380   | -200 | 1740  | -80  | H0 |
| ATOM   | 181 | HH12 | ARG | A | 11 | -28.958 | -7.893  | -1.580 | 1.00 | 52.83 | H0   |    |
| ANISOU | 181 | HH12 | ARG | A | 11 | 8410    | 6190    | 5470   | -280 | 1800  | -90  | H0 |
| ATOM   | 182 | HH21 | ARG | A | 11 | -29.988 | -9.605  | 1.072  | 1.00 | 50.26 | H0   |    |
| ANISOU | 182 | HH21 | ARG | A | 11 | 7770    | 5950    | 5380   | -190 | 1550  | -140 | H0 |
| ATOM   | 183 | HH22 | ARG | A | 11 | -29.002 | -8.539  | 0.603  | 1.00 | 51.19 | H0   |    |
| ANISOU | 183 | HH22 | ARG | A | 11 | 7970    | 6020    | 5460   | -270 | 1680  | -130 | H0 |
| ATOM   | 184 | N    | GLN | A | 12 | -35.171 | -13.678 | -5.631 | 1.00 | 52.69 | N0   |    |
| ANISOU | 184 | N    | GLN | A | 12 | 8370    | 6720    | 4930   | -30  | 1280  | -330 | N0 |
| ATOM   | 185 | CA   | GLN | A | 12 | -36.229 | -13.721 | -6.676 | 1.00 | 55.33 | C0   |    |
| ANISOU | 185 | CA   | GLN | A | 12 | 8750    | 7190    | 5080   | 0    | 1200  | -340 | C0 |

|        |     |      |     |   |    |         |         |         |      |       |      |    |
|--------|-----|------|-----|---|----|---------|---------|---------|------|-------|------|----|
| ATOM   | 186 | C    | GLN | A | 12 | -37.216 | -14.857 | -6.378  | 1.00 | 55.20 | C0   |    |
| ANISOU | 186 | C    | GLN | A | 12 | 8640    | 7260    | 5070    | -40  | 1110  | -430 | C0 |
| ATOM   | 187 | O    | GLN | A | 12 | -38.298 | -14.864 | -6.996  | 1.00 | 56.03 | O0   |    |
| ANISOU | 187 | O    | GLN | A | 12 | 8750    | 7510    | 5030    | -10  | 1020  | -440 | O0 |
| ATOM   | 188 | CB   | GLN | A | 12 | -35.619 | -13.913 | -8.068  | 1.00 | 57.59 | C0   |    |
| ANISOU | 188 | CB   | GLN | A | 12 | 9140    | 7500    | 5240    | -40  | 1300  | -380 | C0 |
| ATOM   | 189 | CG   | GLN | A | 12 | -34.819 | -12.714 | -8.553  | 1.00 | 59.00 | C0   |    |
| ANISOU | 189 | CG   | GLN | A | 12 | 9440    | 7610    | 5360    | -20  | 1390  | -290 | C0 |
| ATOM   | 190 | CD   | GLN | A | 12 | -34.146 | -12.992 | -9.873  | 1.00 | 61.86 | C0   |    |
| ANISOU | 190 | CD   | GLN | A | 12 | 9890    | 8000    | 5620    | -70  | 1490  | -340 | C0 |
| ATOM   | 191 | OE1  | GLN | A | 12 | -32.920 | -13.029 | -9.974  | 1.00 | 62.61 | O0   |    |
| ANISOU | 191 | OE1  | GLN | A | 12 | 10000   | 8010    | 5780    | -120 | 1630  | -360 | O0 |
| ATOM   | 192 | NE2  | GLN | A | 12 | -34.950 | -13.213 | -10.901 | 1.00 | 64.27 | N0   |    |
| ANISOU | 192 | NE2  | GLN | A | 12 | 10250   | 8440    | 5730    | -60  | 1440  | -360 | N0 |
| ATOM   | 193 | H    | GLN | A | 12 | -34.409 | -14.122 | -5.860  | 1.00 | 53.05 | H0   |    |
| ANISOU | 193 | H    | GLN | A | 12 | 8410    | 6730    | 5020    | -70  | 1350  | -370 | H0 |
| ATOM   | 194 | HA   | GLN | A | 12 | -36.718 | -12.867 | -6.660  | 1.00 | 55.41 | H0   |    |
| ANISOU | 194 | HA   | GLN | A | 12 | 8800    | 7230    | 5020    | 60   | 1160  | -260 | H0 |
| ATOM   | 195 | HB2  | GLN | A | 12 | -35.036 | -14.701 | -8.048  | 1.00 | 57.38 | H0   |    |
| ANISOU | 195 | HB2  | GLN | A | 12 | 9080    | 7430    | 5290    | -100 | 1350  | -450 | H0 |
| ATOM   | 196 | HB3  | GLN | A | 12 | -36.343 | -14.093 | -8.704  | 1.00 | 58.28 | H0   |    |
| ANISOU | 196 | HB3  | GLN | A | 12 | 9250    | 7690    | 5210    | -30  | 1240  | -400 | H0 |
| ATOM   | 197 | HG2  | GLN | A | 12 | -35.418 | -11.943 | -8.652  | 1.00 | 59.49 | H0   |    |
| ANISOU | 197 | HG2  | GLN | A | 12 | 9550    | 7710    | 5340    | 50   | 1340  | -210 | H0 |
| ATOM   | 198 | HG3  | GLN | A | 12 | -34.139 | -12.485 | -7.885  | 1.00 | 58.47 | H0   |    |
| ANISOU | 198 | HG3  | GLN | A | 12 | 9340    | 7460    | 5420    | -30  | 1440  | -270 | H0 |
| ATOM   | 199 | HE21 | GLN | A | 12 | -34.632 | -13.576 | -11.642 | 1.00 | 64.58 | H0   |    |
| ANISOU | 199 | HE21 | GLN | A | 12 | 10330   | 8500    | 5710    | -100 | 1490  | -410 | H0 |
| ATOM   | 200 | HE22 | GLN | A | 12 | -35.806 | -12.998 | -10.848 | 1.00 | 63.99 | H0   |    |
| ANISOU | 200 | HE22 | GLN | A | 12 | 10200   | 8470    | 5640    | -10  | 1350  | -330 | H0 |
| ATOM   | 201 | N    | THR | A | 13 | -36.856 | -15.779 | -5.478  | 1.00 | 54.24 | N0   |    |
| ANISOU | 201 | N    | THR | A | 13 | 8430    | 7060    | 5120    | -90  | 1130  | -490 | N0 |
| ATOM   | 202 | CA   | THR | A | 13 | -37.590 | -17.049 | -5.231  | 1.00 | 53.99 | C0   |    |
| ANISOU | 202 | CA   | THR | A | 13 | 8330    | 7070    | 5120    | -150 | 1080  | -590 | C0 |
| ATOM   | 203 | C    | THR | A | 13 | -38.184 | -17.047 | -3.821  | 1.00 | 53.41 | C0   |    |
| ANISOU | 203 | C    | THR | A | 13 | 8160    | 6980    | 5160    | -130 | 1000  | -560 | C0 |
| ATOM   | 204 | O    | THR | A | 13 | -39.398 | -17.290 | -3.704  | 1.00 | 54.23 | O0   |    |
| ANISOU | 204 | O    | THR | A | 13 | 8210    | 7200    | 5200    | -140 | 900   | -590 | O0 |
| ATOM   | 205 | CB   | THR | A | 13 | -36.677 | -18.260 | -5.459  | 1.00 | 53.89 | C0   |    |
| ANISOU | 205 | CB   | THR | A | 13 | 8330    | 6960    | 5190    | -230 | 1190  | -690 | C0 |
| ATOM   | 206 | OG1  | THR | A | 13 | -36.320 | -18.285 | -6.841  | 1.00 | 54.07 | O0   |    |
| ANISOU | 206 | OG1  | THR | A | 13 | 8440    | 7030    | 5080    | -250 | 1250  | -740 | O0 |
| ATOM   | 207 | CG2  | THR | A | 13 | -37.332 | -19.568 | -5.079  | 1.00 | 54.26 | C0   |    |
| ANISOU | 207 | CG2  | THR | A | 13 | 8320    | 7010    | 5280    | -300 | 1160  | -790 | C0 |
| ATOM   | 208 | H    | THR | A | 13 | -36.121 | -15.699 | -4.951  | 1.00 | 53.60 | H0   |    |
| ANISOU | 208 | H    | THR | A | 13 | 8330    | 6890    | 5140    | -90  | 1180  | -470 | H0 |
| ATOM   | 209 | HA   | THR | A | 13 | -38.332 | -17.100 | -5.877  | 1.00 | 54.85 | H0   |    |
| ANISOU | 209 | HA   | THR | A | 13 | 8450    | 7290    | 5100    | -160 | 1030  | -620 | H0 |
| ATOM   | 210 | HB   | THR | A | 13 | -35.861 | -18.141 | -4.917  | 1.00 | 53.20 | H0   |    |
| ANISOU | 210 | HB   | THR | A | 13 | 8220    | 6780    | 5210    | -210 | 1240  | -660 | H0 |
| ATOM   | 211 | HG21 | THR | A | 13 | -37.214 | -19.728 | -4.126  | 1.00 | 53.36 | H0   |    |
| ANISOU | 211 | HG21 | THR | A | 13 | 8160    | 6830    | 5280    | -290 | 1150  | -770 | H0 |
| ATOM   | 212 | HG22 | THR | A | 13 | -36.923 | -20.293 | -5.582  | 1.00 | 54.72 | H0   |    |
| ANISOU | 212 | HG22 | THR | A | 13 | 8420    | 7030    | 5340    | -340 | 1230  | -860 | H0 |

|        |     |      |     |   |    |         |         |        |      |       |      |    |
|--------|-----|------|-----|---|----|---------|---------|--------|------|-------|------|----|
| ATOM   | 213 | HG23 | THR | A | 13 | -38.283 | -19.528 | -5.285 | 1.00 | 54.54 | H0   |    |
| ANISOU | 213 | HG23 | THR | A | 13 | 8340    | 7150    | 5230   | -310 | 1080  | -810 | H0 |
| ATOM   | 214 | N    | SER | A | 14 | -37.358 | -16.818 | -2.796 | 1.00 | 53.22 | N0   |    |
| ANISOU | 214 | N    | SER | A | 14 | 8100    | 6840    | 5280   | -110 | 1040  | -510 | N0 |
| ATOM   | 215 | CA   | SER | A | 14 | -37.795 | -16.754 | -1.376 | 1.00 | 52.29 | C0   |    |
| ANISOU | 215 | CA   | SER | A | 14 | 7890    | 6700    | 5280   | -90  | 980   | -470 | C0 |
| ATOM   | 216 | C    | SER | A | 14 | -38.673 | -15.518 | -1.166 | 1.00 | 52.53 | C0   |    |
| ANISOU | 216 | C    | SER | A | 14 | 7920    | 6810    | 5230   | -20  | 890   | -390 | C0 |
| ATOM   | 217 | O    | SER | A | 14 | -38.361 | -14.452 | -1.745 | 1.00 | 52.03 | O0   |    |
| ANISOU | 217 | O    | SER | A | 14 | 7940    | 6740    | 5090   | 40   | 920   | -320 | O0 |
| ATOM   | 218 | CB   | SER | A | 14 | -36.638 | -16.751 | -0.417 | 1.00 | 51.47 | C0   |    |
| ANISOU | 218 | CB   | SER | A | 14 | 7750    | 6470    | 5330   | -90  | 1040  | -440 | C0 |
| ATOM   | 219 | OG   | SER | A | 14 | -37.113 | -16.672 | 0.920  | 1.00 | 50.77 | O0   |    |
| ANISOU | 219 | OG   | SER | A | 14 | 7590    | 6380    | 5330   | -80  | 980   | -400 | O0 |
| ATOM   | 220 | H    | SER | A | 14 | -36.462 | -16.689 | -2.891 | 1.00 | 52.96 | H0   |    |
| ANISOU | 220 | H    | SER | A | 14 | 8090    | 6740    | 5290   | -110 | 1120  | -500 | H0 |
| ATOM   | 221 | HA   | SER | A | 14 | -38.349 | -17.561 | -1.194 | 1.00 | 52.41 | H0   |    |
| ANISOU | 221 | HA   | SER | A | 14 | 7870    | 6740    | 5300   | -140 | 950   | -530 | H0 |
| ATOM   | 222 | HB2  | SER | A | 14 | -36.111 | -17.573 | -0.533 | 1.00 | 51.66 | H0   |    |
| ANISOU | 222 | HB2  | SER | A | 14 | 7780    | 6450    | 5410   | -120 | 1100  | -490 | H0 |
| ATOM   | 223 | HB3  | SER | A | 14 | -36.057 | -15.981 | -0.604 | 1.00 | 51.50 | H0   |    |
| ANISOU | 223 | HB3  | SER | A | 14 | 7790    | 6450    | 5330   | -60  | 1080  | -400 | H0 |
| ATOM   | 224 | N    | ARG | A | 15 | -39.731 | -15.674 | -0.368 | 1.00 | 52.78 | N0   |    |
| ANISOU | 224 | N    | ARG | A | 15 | 7870    | 6910    | 5280   | -10  | 800   | -390 | N0 |
| ATOM   | 225 | CA   | ARG | A | 15 | -40.632 | -14.577 | 0.063  | 1.00 | 53.20 | C0   |    |
| ANISOU | 225 | CA   | ARG | A | 15 | 7900    | 7030    | 5280   | 80   | 720   | -320 | C0 |
| ATOM   | 226 | C    | ARG | A | 15 | -40.706 | -14.603 | 1.586  | 1.00 | 50.95 | C0   |    |
| ANISOU | 226 | C    | ARG | A | 15 | 7540    | 6700    | 5130   | 80   | 700   | -300 | C0 |
| ATOM   | 227 | O    | ARG | A | 15 | -41.297 | -15.513 | 2.165  | 1.00 | 49.82 | O0   |    |
| ANISOU | 227 | O    | ARG | A | 15 | 7310    | 6590    | 5030   | 20   | 660   | -350 | O0 |
| ATOM   | 228 | CB   | ARG | A | 15 | -41.997 | -14.729 | -0.613 | 1.00 | 56.16 | C0   |    |
| ANISOU | 228 | CB   | ARG | A | 15 | 8250    | 7590    | 5500   | 100  | 620   | -350 | C0 |
| ATOM   | 229 | CG   | ARG | A | 15 | -41.931 | -14.666 | -2.132 | 1.00 | 59.72 | C0   |    |
| ANISOU | 229 | CG   | ARG | A | 15 | 8780    | 8110    | 5800   | 100  | 640   | -370 | C0 |
| ATOM   | 230 | CD   | ARG | A | 15 | -43.160 | -14.044 | -2.768 | 1.00 | 62.94 | C0   |    |
| ANISOU | 230 | CD   | ARG | A | 15 | 9180    | 8710    | 6030   | 190  | 540   | -340 | C0 |
| ATOM   | 231 | NE   | ARG | A | 15 | -42.989 | -13.862 | -4.208 | 1.00 | 65.43 | N0   |    |
| ANISOU | 231 | NE   | ARG | A | 15 | 9590    | 9090    | 6180   | 210  | 560   | -340 | N0 |
| ATOM   | 232 | CZ   | ARG | A | 15 | -43.323 | -14.748 | -5.148 | 1.00 | 67.63 | C0   |    |
| ANISOU | 232 | CZ   | ARG | A | 15 | 9860    | 9490    | 6350   | 130  | 540   | -440 | C0 |
| ATOM   | 233 | NH1  | ARG | A | 15 | -43.112 | -14.460 | -6.422 | 1.00 | 69.39 | N0   |    |
| ANISOU | 233 | NH1  | ARG | A | 15 | 10180   | 9770    | 6420   | 150  | 560   | -420 | N0 |
| ATOM   | 234 | NH2  | ARG | A | 15 | -43.860 | -15.915 | -4.824 | 1.00 | 67.99 | N0   |    |
| ANISOU | 234 | NH2  | ARG | A | 15 | 9800    | 9590    | 6440   | 10   | 510   | -550 | N0 |
| ATOM   | 235 | H    | ARG | A | 15 | -39.969 | -16.487 | -0.033 | 1.00 | 52.62 | H0   |    |
| ANISOU | 235 | H    | ARG | A | 15 | 7810    | 6890    | 5300   | -60  | 790   | -440 | H0 |
| ATOM   | 236 | HA   | ARG | A | 15 | -40.238 | -13.724 | -0.222 | 1.00 | 53.36 | H0   |    |
| ANISOU | 236 | HA   | ARG | A | 15 | 7990    | 7020    | 5270   | 130  | 750   | -260 | H0 |
| ATOM   | 237 | HB2  | ARG | A | 15 | -42.382 | -15.589 | -0.349 | 1.00 | 56.16 | H0   |    |
| ANISOU | 237 | HB2  | ARG | A | 15 | 8180    | 7620    | 5530   | 30   | 600   | -420 | H0 |
| ATOM   | 238 | HB3  | ARG | A | 15 | -42.590 | -14.019 | -0.289 | 1.00 | 56.27 | H0   |    |
| ANISOU | 238 | HB3  | ARG | A | 15 | 8240    | 7660    | 5490   | 170  | 570   | -300 | H0 |
| ATOM   | 239 | HG2  | ARG | A | 15 | -41.143 | -14.145 | -2.397 | 1.00 | 59.54 | H0   |    |
| ANISOU | 239 | HG2  | ARG | A | 15 | 8830    | 8010    | 5780   | 130  | 700   | -320 | H0 |

|        |     |               |         |         |        |      |       |      |    |
|--------|-----|---------------|---------|---------|--------|------|-------|------|----|
| ATOM   | 240 | HG3 ARG A 15  | -41.819 | -15.575 | -2.485 | 1.00 | 59.87 | H0   |    |
| ANISOU | 240 | HG3 ARG A 15  | 8790    | 8140    | 5820   | 20   | 660   | -450 | H0 |
| ATOM   | 241 | HD2 ARG A 15  | -43.939 | -14.615 | -2.597 | 1.00 | 62.96 | H0   |    |
| ANISOU | 241 | HD2 ARG A 15  | 9100    | 8810    | 6010   | 150  | 480   | -400 | H0 |
| ATOM   | 242 | HD3 ARG A 15  | -43.331 | -13.172 | -2.353 | 1.00 | 62.53 | H0   |    |
| ANISOU | 242 | HD3 ARG A 15  | 9130    | 8640    | 5980   | 280  | 520   | -260 | H0 |
| ATOM   | 243 | HE ARG A 15   | -42.638 | -13.111 | -4.476 | 1.00 | 65.67 | H0   |    |
| ANISOU | 243 | HE ARG A 15   | 9690    | 9080    | 6180   | 270  | 590   | -270 | H0 |
| ATOM   | 244 | HH11 ARG A 15 | -42.756 | -13.687 | -6.644 | 1.00 | 69.23 | H0   |    |
| ANISOU | 244 | HH11 ARG A 15 | 10230   | 9700    | 6370   | 220  | 590   | -350 | H0 |
| ATOM   | 245 | HH12 ARG A 15 | -43.331 | -15.040 | -7.045 | 1.00 | 69.85 | H0   |    |
| ANISOU | 245 | HH12 ARG A 15 | 10230   | 9910    | 6400   | 90   | 550   | -500 | H0 |
| ATOM   | 246 | HH21 ARG A 15 | -44.003 | -16.121 | -3.982 | 1.00 | 67.07 | H0   |    |
| ANISOU | 246 | HH21 ARG A 15 | 9630    | 9430    | 6420   | -10  | 500   | -560 | H0 |
| ATOM   | 247 | HH22 ARG A 15 | -44.073 | -16.488 | -5.458 | 1.00 | 68.56 | H0   |    |
| ANISOU | 247 | HH22 ARG A 15 | 9880    | 9740    | 6440   | -50  | 510   | -630 | H0 |
| ATOM   | 248 | N PRO A 16    | -40.083 | -13.621 | 2.277  | 1.00 | 49.10 | N0   |    |
| ANISOU | 248 | N PRO A 16    | 7320    | 6370    | 4960   | 130  | 730   | -220 | N0 |
| ATOM   | 249 | CA PRO A 16   | -40.102 | -13.568 | 3.740  | 1.00 | 47.92 | C0   |    |
| ANISOU | 249 | CA PRO A 16   | 7100    | 6180    | 4930   | 120  | 710   | -200 | C0 |
| ATOM   | 250 | C PRO A 16    | -41.480 | -13.803 | 4.382  | 1.00 | 47.27 | C0   |    |
| ANISOU | 250 | C PRO A 16    | 6930    | 6210    | 4820   | 130  | 610   | -220 | C0 |
| ATOM   | 251 | O PRO A 16    | -41.513 | -14.369 | 5.457  | 1.00 | 47.41 | O0   |    |
| ANISOU | 251 | O PRO A 16    | 6880    | 6200    | 4940   | 90   | 600   | -230 | O0 |
| ATOM   | 252 | CB PRO A 16   | -39.626 | -12.138 | 4.047  | 1.00 | 47.73 | C0   |    |
| ANISOU | 252 | CB PRO A 16   | 7140    | 6090    | 4910   | 190  | 740   | -120 | C0 |
| ATOM   | 253 | CG PRO A 16   | -38.738 | -11.777 | 2.877  | 1.00 | 48.30 | C0   |    |
| ANISOU | 253 | CG PRO A 16   | 7320    | 6110    | 4930   | 180  | 820   | -110 | C0 |
| ATOM   | 254 | CD PRO A 16   | -39.318 | -12.510 | 1.686  | 1.00 | 49.28 | C0   |    |
| ANISOU | 254 | CD PRO A 16   | 7450    | 6330    | 4940   | 170  | 790   | -160 | C0 |
| ATOM   | 255 | HA PRO A 16   | -39.448 | -14.217 | 4.099  | 1.00 | 47.39 | H0   |    |
| ANISOU | 255 | HA PRO A 16   | 7010    | 6050    | 4940   | 70   | 750   | -230 | H0 |
| ATOM   | 256 | HB2 PRO A 16  | -40.386 | -11.520 | 4.110  | 1.00 | 47.97 | H0   |    |
| ANISOU | 256 | HB2 PRO A 16  | 7170    | 6170    | 4880   | 250  | 690   | -90  | H0 |
| ATOM   | 257 | HB3 PRO A 16  | -39.123 | -12.109 | 4.888  | 1.00 | 47.14 | H0   |    |
| ANISOU | 257 | HB3 PRO A 16  | 7030    | 5960    | 4920   | 160  | 760   | -120 | H0 |
| ATOM   | 258 | HG2 PRO A 16  | -38.744 | -10.810 | 2.724  | 1.00 | 48.65 | H0   |    |
| ANISOU | 258 | HG2 PRO A 16  | 7420    | 6140    | 4930   | 230  | 830   | -60  | H0 |
| ATOM   | 259 | HG3 PRO A 16  | -37.816 | -12.063 | 3.042  | 1.00 | 48.05 | H0   |    |
| ANISOU | 259 | HG3 PRO A 16  | 7280    | 6010    | 4960   | 130  | 880   | -130 | H0 |
| ATOM   | 260 | HD2 PRO A 16  | -39.901 | -11.925 | 1.167  | 1.00 | 49.88 | H0   |    |
| ANISOU | 260 | HD2 PRO A 16  | 7570    | 6460    | 4920   | 230  | 760   | -130 | H0 |
| ATOM   | 261 | HD3 PRO A 16  | -38.610 | -12.846 | 1.106  | 1.00 | 49.49 | H0   |    |
| ANISOU | 261 | HD3 PRO A 16  | 7520    | 6320    | 4970   | 130  | 850   | -180 | H0 |
| ATOM   | 262 | N ASP A 17    | -42.560 | -13.365 | 3.723  | 1.00 | 47.54 | N0   |    |
| ANISOU | 262 | N ASP A 17    | 6960    | 6370    | 4730   | 190  | 550   | -210 | N0 |
| ATOM   | 263 | CA ASP A 17   | -43.939 | -13.320 | 4.284  | 1.00 | 48.00 | C0   |    |
| ANISOU | 263 | CA ASP A 17   | 6920    | 6560    | 4750   | 230  | 460   | -220 | C0 |
| ATOM   | 264 | C ASP A 17    | -44.802 | -14.470 | 3.742  | 1.00 | 47.65 | C0   |    |
| ANISOU | 264 | C ASP A 17    | 6810    | 6650    | 4640   | 140  | 410   | -310 | C0 |
| ATOM   | 265 | O ASP A 17    | -46.010 | -14.459 | 4.019  | 1.00 | 47.70 | O0   |    |
| ANISOU | 265 | O ASP A 17    | 6720    | 6810    | 4590   | 160  | 330   | -330 | O0 |
| ATOM   | 266 | CB ASP A 17   | -44.597 | -11.973 | 3.979  | 1.00 | 50.01 | C0   |    |
| ANISOU | 266 | CB ASP A 17   | 7210    | 6890    | 4900   | 370  | 410   | -150 | C0 |

|        |     |      |     |   |    |         |         |        |      |       |      |    |
|--------|-----|------|-----|---|----|---------|---------|--------|------|-------|------|----|
| ATOM   | 267 | CG   | ASP | A | 17 | -43.767 | -10.773 | 4.409  | 1.00 | 51.25 | C0   |    |
| ANISOU | 267 | CG   | ASP | A | 17 | 7460    | 6900    | 5110   | 440  | 480   | -70  | C0 |
| ATOM   | 268 | OD1  | ASP | A | 17 | -43.029 | -10.891 | 5.413  | 1.00 | 52.10 | O0   |    |
| ANISOU | 268 | OD1  | ASP | A | 17 | 7560    | 6900    | 5350   | 380  | 520   | -70  | O0 |
| ATOM   | 269 | OD2  | ASP | A | 17 | -43.872 | -9.724  | 3.745  | 1.00 | 52.11 | O0   |    |
| ANISOU | 269 | OD2  | ASP | A | 17 | 7670    | 7010    | 5130   | 550  | 480   | 0    | O0 |
| ATOM   | 270 | H    | ASP | A | 17 | -42.514 | -13.045 | 2.872  | 1.00 | 48.32 | H0   |    |
| ANISOU | 270 | H    | ASP | A | 17 | 7120    | 6490    | 4750   | 230  | 560   | -200 | H0 |
| ATOM   | 271 | HA   | ASP | A | 17 | -43.876 | -13.413 | 5.261  | 1.00 | 47.39 | H0   |    |
| ANISOU | 271 | HA   | ASP | A | 17 | 6800    | 6440    | 4760   | 210  | 460   | -220 | H0 |
| ATOM   | 272 | HB2  | ASP | A | 17 | -44.759 | -11.908 | 3.016  | 1.00 | 50.84 | H0   |    |
| ANISOU | 272 | HB2  | ASP | A | 17 | 7360    | 7050    | 4910   | 400  | 400   | -150 | H0 |
| ATOM   | 273 | HB3  | ASP | A | 17 | -45.461 | -11.928 | 4.437  | 1.00 | 50.22 | H0   |    |
| ANISOU | 273 | HB3  | ASP | A | 17 | 7160    | 7000    | 4910   | 400  | 360   | -160 | H0 |
| ATOM   | 274 | N    | VAL | A | 18 | -44.217 | -15.420 | 3.005  | 1.00 | 46.72 | N0   |    |
| ANISOU | 274 | N    | VAL | A | 18 | 6730    | 6490    | 4520   | 50   | 460   | -370 | N0 |
| ATOM   | 275 | CA   | VAL | A | 18 | -44.941 | -16.576 | 2.395  | 1.00 | 47.23 | C0   |    |
| ANISOU | 275 | CA   | VAL | A | 18 | 6760    | 6670    | 4520   | -50  | 430   | -480 | C0 |
| ATOM   | 276 | C    | VAL | A | 18 | -44.288 | -17.880 | 2.867  | 1.00 | 46.10 | C0   |    |
| ANISOU | 276 | C    | VAL | A | 18 | 6620    | 6390    | 4500   | -180 | 510   | -540 | C0 |
| ATOM   | 277 | O    | VAL | A | 18 | -43.131 | -18.121 | 2.489  | 1.00 | 46.57 | O0   |    |
| ANISOU | 277 | O    | VAL | A | 18 | 6760    | 6320    | 4610   | -190 | 590   | -540 | O0 |
| ATOM   | 278 | CB   | VAL | A | 18 | -44.949 | -16.494 | 0.857  | 1.00 | 48.45 | C0   |    |
| ANISOU | 278 | CB   | VAL | A | 18 | 6970    | 6910    | 4530   | -40  | 430   | -510 | C0 |
| ATOM   | 279 | CG1  | VAL | A | 18 | -45.647 | -17.696 | 0.238  | 1.00 | 49.45 | C0   |    |
| ANISOU | 279 | CG1  | VAL | A | 18 | 7060    | 7150    | 4580   | -170 | 410   | -630 | C0 |
| ATOM   | 280 | CG2  | VAL | A | 18 | -45.567 | -15.196 | 0.358  | 1.00 | 49.26 | C0   |    |
| ANISOU | 280 | CG2  | VAL | A | 18 | 7090    | 7130    | 4500   | 110  | 360   | -430 | C0 |
| ATOM   | 281 | H    | VAL | A | 18 | -43.325 | -15.424 | 2.827  | 1.00 | 46.62 | H0   |    |
| ANISOU | 281 | H    | VAL | A | 18 | 6780    | 6380    | 4550   | 40   | 520   | -360 | H0 |
| ATOM   | 282 | HA   | VAL | A | 18 | -45.863 | -16.562 | 2.708  | 1.00 | 47.47 | H0   |    |
| ANISOU | 282 | HA   | VAL | A | 18 | 6710    | 6810    | 4520   | -50  | 370   | -500 | H0 |
| ATOM   | 283 | HB   | VAL | A | 18 | -44.008 | -16.512 | 0.559  | 1.00 | 48.21 | H0   |    |
| ANISOU | 283 | HB   | VAL | A | 18 | 7020    | 6770    | 4530   | -50  | 500   | -500 | H0 |
| ATOM   | 284 | HG11 | VAL | A | 18 | -45.046 | -18.461 | 0.244  | 1.00 | 49.25 | H0   |    |
| ANISOU | 284 | HG11 | VAL | A | 18 | 7070    | 7020    | 4620   | -250 | 480   | -680 | H0 |
| ATOM   | 285 | HG12 | VAL | A | 18 | -45.898 | -17.490 | -0.679 | 1.00 | 50.33 | H0   |    |
| ANISOU | 285 | HG12 | VAL | A | 18 | 7190    | 7360    | 4570   | -150 | 390   | -650 | H0 |
| ATOM   | 286 | HG13 | VAL | A | 18 | -46.446 | -17.907 | 0.752  | 1.00 | 49.58 | H0   |    |
| ANISOU | 286 | HG13 | VAL | A | 18 | 6990    | 7250    | 4600   | -200 | 360   | -660 | H0 |
| ATOM   | 287 | HG21 | VAL | A | 18 | -46.493 | -15.142 | 0.655  | 1.00 | 49.55 | H0   |    |
| ANISOU | 287 | HG21 | VAL | A | 18 | 7040    | 7290    | 4500   | 120  | 300   | -440 | H0 |
| ATOM   | 288 | HG22 | VAL | A | 18 | -45.537 | -15.175 | -0.614 | 1.00 | 50.00 | H0   |    |
| ANISOU | 288 | HG22 | VAL | A | 18 | 7220    | 7280    | 4490   | 110  | 360   | -440 | H0 |
| ATOM   | 289 | HG23 | VAL | A | 18 | -45.069 | -14.440 | 0.713  | 1.00 | 48.66 | H0   |    |
| ANISOU | 289 | HG23 | VAL | A | 18 | 7050    | 6970    | 4470   | 180  | 390   | -360 | H0 |
| ATOM   | 290 | N    | ILE | A | 19 | -45.015 | -18.696 | 3.637  | 1.00 | 44.82 | N0   |    |
| ANISOU | 290 | N    | ILE | A | 19 | 6380    | 6270    | 4380   | -260 | 480   | -590 | N0 |
| ATOM   | 291 | CA   | ILE | A | 19 | -44.533 | -20.012 | 4.155  | 1.00 | 44.43 | C0   |    |
| ANISOU | 291 | CA   | ILE | A | 19 | 6360    | 6080    | 4440   | -380 | 550   | -650 | C0 |
| ATOM   | 292 | C    | ILE | A | 19 | -44.298 | -20.944 | 2.962  | 1.00 | 45.49 | C0   |    |
| ANISOU | 292 | C    | ILE | A | 19 | 6560    | 6200    | 4520   | -460 | 610   | -740 | C0 |
| ATOM   | 293 | O    | ILE | A | 19 | -45.168 | -21.092 | 2.105  | 1.00 | 45.95 | O0   |    |
| ANISOU | 293 | O    | ILE | A | 19 | 6600    | 6410    | 4450   | -510 | 560   | -820 | O0 |



|                          |         |         |       |      |       |      |    |
|--------------------------|---------|---------|-------|------|-------|------|----|
| ATOM 294 CB ILE A 19     | -45.511 | -20.593 | 5.202 | 1.00 | 43.87 | C0   |    |
| ANISOU 294 CB ILE A 19   | 6200    | 6060    | 4410  | -460 | 520   | -680 | C0 |
| ATOM 295 CG1 ILE A 19    | -44.895 | -21.786 | 5.937 | 1.00 | 43.98 | C0   |    |
| ANISOU 295 CG1 ILE A 19  | 6260    | 5900    | 4550  | -540 | 600   | -690 | C0 |
| ATOM 296 CG2 ILE A 19    | -46.859 | -20.944 | 4.584 | 1.00 | 45.09 | C0   |    |
| ANISOU 296 CG2 ILE A 19  | 6290    | 6420    | 4430  | -540 | 460   | -770 | C0 |
| ATOM 297 CD1 ILE A 19    | -45.715 | -22.293 | 7.112 | 1.00 | 43.68 | C0   |    |
| ANISOU 297 CD1 ILE A 19  | 6160    | 5890    | 4550  | -620 | 590   | -700 | C0 |
| ATOM 298 H ILE A 19      | -45.857 | -18.484 | 3.910 | 1.00 | 45.29 | H0   |    |
| ANISOU 298 H ILE A 19    | 6380    | 6430    | 4400  | -260 | 430   | -600 | H0 |
| ATOM 299 HA ILE A 19     | -43.682 | -19.861 | 4.598 | 1.00 | 43.66 | H0   |    |
| ANISOU 299 HA ILE A 19   | 6290    | 5870    | 4430  | -340 | 600   | -600 | H0 |
| ATOM 300 HB ILE A 19     | -45.670 | -19.886 | 5.875 | 1.00 | 43.48 | H0   |    |
| ANISOU 300 HB ILE A 19   | 6110    | 6040    | 4380  | -390 | 490   | -620 | H0 |
| ATOM 301 HG12 ILE A 19   | -44.778 | -22.521 | 5.299 | 1.00 | 44.48 | H0   |    |
| ANISOU 301 HG12 ILE A 19 | 6370    | 5940    | 4590  | -610 | 650   | -760 | H0 |
| ATOM 302 HG13 ILE A 19   | -44.007 | -21.529 | 6.262 | 1.00 | 43.13 | H0   |    |
| ANISOU 302 HG13 ILE A 19 | 6190    | 5690    | 4510  | -480 | 640   | -630 | H0 |
| ATOM 303 HG21 ILE A 19   | -47.102 | -20.274 | 3.924 | 1.00 | 45.48 | H0   |    |
| ANISOU 303 HG21 ILE A 19 | 6320    | 6570    | 4390  | -480 | 420   | -760 | H0 |
| ATOM 304 HG22 ILE A 19   | -47.538 | -20.971 | 5.280 | 1.00 | 45.11 | H0   |    |
| ANISOU 304 HG22 ILE A 19 | 6220    | 6480    | 4440  | -570 | 430   | -780 | H0 |
| ATOM 305 HG23 ILE A 19   | -46.804 | -21.815 | 4.154 | 1.00 | 45.73 | H0   |    |
| ANISOU 305 HG23 ILE A 19 | 6400    | 6460    | 4510  | -640 | 500   | -850 | H0 |
| ATOM 306 HD11 ILE A 19   | -45.819 | -21.582 | 7.768 | 1.00 | 43.15 | H0   |    |
| ANISOU 306 HD11 ILE A 19 | 6040    | 5850    | 4500  | -550 | 550   | -640 | H0 |
| ATOM 307 HD12 ILE A 19   | -45.259 | -23.047 | 7.522 | 1.00 | 43.71 | H0   |    |
| ANISOU 307 HD12 ILE A 19 | 6210    | 5770    | 4630  | -660 | 650   | -700 | H0 |
| ATOM 308 HD13 ILE A 19   | -46.592 | -22.577 | 6.801 | 1.00 | 44.54 | H0   |    |
| ANISOU 308 HD13 ILE A 19 | 6220    | 6110    | 4590  | -690 | 560   | -770 | H0 |
| ATOM 309 N PRO A 20      | -43.096 | -21.554 | 2.830 | 1.00 | 45.24 | N0   |    |
| ANISOU 309 N PRO A 20    | 6610    | 6000    | 4580  | -480 | 710   | -750 | N0 |
| ATOM 310 CA PRO A 20     | -42.793 | -22.429 | 1.695 | 1.00 | 47.42 | C0   |    |
| ANISOU 310 CA PRO A 20   | 6970    | 6240    | 4810  | -550 | 770   | -850 | C0 |
| ATOM 311 C PRO A 20      | -43.269 | -23.882 | 1.865 | 1.00 | 48.75 | C0   |    |
| ANISOU 311 C PRO A 20    | 7160    | 6360    | 5000  | -700 | 820   | -950 | C0 |
| ATOM 312 O PRO A 20      | -42.441 | -24.770 | 1.951 | 1.00 | 48.89 | O0   |    |
| ANISOU 312 O PRO A 20    | 7250    | 6210    | 5110  | -720 | 920   | -980 | O0 |
| ATOM 313 CB PRO A 20     | -41.260 | -22.343 | 1.640 | 1.00 | 46.46 | C0   |    |
| ANISOU 313 CB PRO A 20   | 6920    | 5960    | 4780  | -480 | 860   | -800 | C0 |
| ATOM 314 CG PRO A 20     | -40.860 | -22.240 | 3.093 | 1.00 | 45.23 | C0   |    |
| ANISOU 314 CG PRO A 20   | 6720    | 5700    | 4760  | -430 | 860   | -710 | C0 |
| ATOM 315 CD PRO A 20     | -41.938 | -21.375 | 3.718 | 1.00 | 44.55 | C0   |    |
| ANISOU 315 CD PRO A 20   | 6550    | 5750    | 4630  | -410 | 760   | -670 | C0 |
| ATOM 316 HA PRO A 20     | -43.173 | -22.041 | 0.868 | 1.00 | 47.76 | H0   |    |
| ANISOU 316 HA PRO A 20   | 7010    | 6400    | 4740  | -550 | 740   | -870 | H0 |
| ATOM 317 HB2 PRO A 20    | -40.871 | -23.140 | 1.223 | 1.00 | 47.08 | H0   |    |
| ANISOU 317 HB2 PRO A 20  | 7050    | 5960    | 4870  | -530 | 930   | -860 | H0 |
| ATOM 318 HB3 PRO A 20    | -40.970 | -21.550 | 1.141 | 1.00 | 46.41 | H0   |    |
| ANISOU 318 HB3 PRO A 20  | 6920    | 5990    | 4720  | -420 | 850   | -760 | H0 |
| ATOM 319 HG2 PRO A 20    | -40.836 | -23.124 | 3.513 | 1.00 | 45.40 | H0   |    |
| ANISOU 319 HG2 PRO A 20  | 6750    | 5650    | 4840  | -480 | 900   | -740 | H0 |
| ATOM 320 HG3 PRO A 20    | -39.981 | -21.820 | 3.185 | 1.00 | 44.73 | H0   |    |
| ANISOU 320 HG3 PRO A 20  | 6670    | 5580    | 4750  | -370 | 890   | -660 | H0 |

|        |     |               |         |         |        |       |       |       |    |
|--------|-----|---------------|---------|---------|--------|-------|-------|-------|----|
| ATOM   | 321 | HD2 PRO A 20  | -42.144 | -21.672 | 4.624  | 1.00  | 44.19 | H0    |    |
| ANISOU | 321 | HD2 PRO A 20  | 6460    | 5680    | 4650   | -430  | 750   | -650  | H0 |
| ATOM   | 322 | HD3 PRO A 20  | -41.662 | -20.441 | 3.745  | 1.00  | 44.03 | H0    |    |
| ANISOU | 322 | HD3 PRO A 20  | 6470    | 5700    | 4550   | -330  | 740   | -600  | H0 |
| ATOM   | 323 | N THR A 21    | -44.589 | -24.090 | 1.888  | 1.00  | 50.58 | N0    |    |
| ANISOU | 323 | N THR A 21    | 7320    | 6750    | 5150   | -790  | 750   | -1020 | N0 |
| ATOM   | 324 | CA THR A 21   | -45.232 | -25.427 | 1.950  | 1.00  | 52.87 | C0    |    |
| ANISOU | 324 | CA THR A 21   | 7630    | 7020    | 5440   | -970  | 800   | -1140 | C0 |
| ATOM   | 325 | C THR A 21    | -45.235 | -26.037 | 0.546  | 1.00  | 56.12 | C0    |    |
| ANISOU | 325 | C THR A 21    | 8110    | 7460    | 5750   | -1060 | 840   | -1270 | C0 |
| ATOM   | 326 | O THR A 21    | -45.308 | -25.261 | -0.433 | 1.00  | 55.47 | O0    |    |
| ANISOU | 326 | O THR A 21    | 8010    | 7520    | 5540   | -1000 | 790   | -1270 | O0 |
| ATOM   | 327 | CB THR A 21   | -46.672 | -25.365 | 2.480  | 1.00  | 53.11 | C0    |    |
| ANISOU | 327 | CB THR A 21   | 7540    | 7230    | 5410   | -1050 | 710   | -1170 | C0 |
| ATOM   | 328 | OG1 THR A 21  | -47.379 | -24.407 | 1.692  | 1.00  | 53.94 | O0    |    |
| ANISOU | 328 | OG1 THR A 21  | 7560    | 7570    | 5370   | -990  | 610   | -1180 | O0 |
| ATOM   | 329 | CG2 THR A 21  | -46.765 | -25.007 | 3.948  | 1.00  | 51.85 | C0    |    |
| ANISOU | 329 | CG2 THR A 21  | 7320    | 7030    | 5360   | -990  | 690   | -1070 | C0 |
| ATOM   | 330 | H THR A 21    | -45.198 | -23.412 | 1.860  | 1.00  | 50.54 | H0    |    |
| ANISOU | 330 | H THR A 21    | 7250    | 6870    | 5080   | -760  | 680   | -1000 | H0 |
| ATOM   | 331 | HA THR A 21   | -44.698 | -26.000 | 2.546  | 1.00  | 52.67 | H0    |    |
| ANISOU | 331 | HA THR A 21   | 7650    | 6840    | 5520   | -980  | 860   | -1120 | H0 |
| ATOM   | 332 | HB THR A 21   | -47.086 | -26.250 | 2.345  | 1.00  | 54.16 | H0    |    |
| ANISOU | 332 | HB THR A 21   | 7690    | 7360    | 5530   | -1180 | 750   | -1270 | H0 |
| ATOM   | 333 | HG21 THR A 21 | -46.296 | -25.678 | 4.477  | 1.00  | 51.73 | H0    |    |
| ANISOU | 333 | HG21 THR A 21 | 7360    | 6860    | 5440   | -1020 | 750   | -1060 | H0 |
| ATOM   | 334 | HG22 THR A 21 | -47.700 | -24.979 | 4.218  | 1.00  | 52.27 | H0    |    |
| ANISOU | 334 | HG22 THR A 21 | 7290    | 7210    | 5370   | -1050 | 640   | -1100 | H0 |
| ATOM   | 335 | HG23 THR A 21 | -46.358 | -24.135 | 4.098  | 1.00  | 51.01 | H0    |    |
| ANISOU | 335 | HG23 THR A 21 | 7190    | 6920    | 5270   | -870  | 650   | -990  | H0 |
| ATOM   | 336 | N GLN A 22    | -45.161 | -27.369 | 0.475  | 1.00  | 59.56 | N0    |    |
| ANISOU | 336 | N GLN A 22    | 8630    | 7770    | 6230   | -1200 | 940   | -1370 | N0 |
| ATOM   | 337 | CA GLN A 22   | -45.390 | -28.174 | -0.753 | 1.00  | 64.49 | C0    |    |
| ANISOU | 337 | CA GLN A 22   | 9330    | 8430    | 6740   | -1340 | 990   | -1530 | C0 |
| ATOM   | 338 | C GLN A 22    | -46.786 | -28.799 | -0.649 | 1.00  | 67.74 | C0    |    |
| ANISOU | 338 | C GLN A 22    | 9680    | 8990    | 7070   | -1530 | 960   | -1660 | C0 |
| ATOM   | 339 | O GLN A 22    | -47.021 | -29.531 | 0.332  | 1.00  | 68.44 | O0    |    |
| ANISOU | 339 | O GLN A 22    | 9780    | 8960    | 7260   | -1620 | 1010  | -1660 | O0 |
| ATOM   | 340 | CB GLN A 22   | -44.304 | -29.244 | -0.911 | 1.00  | 65.14 | C0    |    |
| ANISOU | 340 | CB GLN A 22   | 9570    | 8250    | 6930   | -1360 | 1150  | -1580 | C0 |
| ATOM   | 341 | CG GLN A 22   | -42.910 | -28.674 | -1.156 | 1.00  | 64.47 | C0    |    |
| ANISOU | 341 | CG GLN A 22   | 9530    | 8050    | 6910   | -1180 | 1190  | -1480 | C0 |
| ATOM   | 342 | CD GLN A 22   | -41.974 | -29.648 | -1.840 | 1.00  | 66.08 | C0    |    |
| ANISOU | 342 | CD GLN A 22   | 9880    | 8070    | 7150   | -1200 | 1330  | -1560 | C0 |
| ATOM   | 343 | OE1 GLN A 22  | -42.344 | -30.342 | -2.789 | 1.00  | 67.28 | O0    |    |
| ANISOU | 343 | OE1 GLN A 22  | 10100   | 8260    | 7210   | -1340 | 1380  | -1710 | O0 |
| ATOM   | 344 | NE2 GLN A 22  | -40.738 | -29.704 | -1.367 | 1.00  | 65.22 | N0    |    |
| ANISOU | 344 | NE2 GLN A 22  | 9820    | 7780    | 7180   | -1070 | 1410  | -1470 | N0 |
| ATOM   | 345 | H GLN A 22    | -44.959 | -27.879 | 1.202  | 1.00  | 59.46 | H0    |    |
| ANISOU | 345 | H GLN A 22    | 8650    | 7630    | 6310   | -1220 | 990   | -1350 | H0 |
| ATOM   | 346 | HA GLN A 22   | -45.365 | -27.575 | -1.533 | 1.00  | 64.36 | H0    |    |
| ANISOU | 346 | HA GLN A 22   | 9300    | 8530    | 6630   | -1290 | 950   | -1530 | H0 |
| ATOM   | 347 | HB2 GLN A 22  | -44.288 | -29.792 | -0.099 | 1.00  | 65.05 | H0    |    |
| ANISOU | 347 | HB2 GLN A 22  | 9580    | 8120    | 7010   | -1390 | 1190  | -1560 | H0 |

|        |     |      |     |   |    |         |         |        |       |       |       |    |
|--------|-----|------|-----|---|----|---------|---------|--------|-------|-------|-------|----|
| ATOM   | 348 | HB3  | GLN | A | 22 | -44.551 | -29.826 | -1.659 | 1.00  | 66.39 | H0    |    |
| ANISOU | 348 | HB3  | GLN | A | 22 | 9780    | 8430    | 7020   | -1470 | 1190  | -1690 | H0 |
| ATOM   | 349 | HG2  | GLN | A | 22 | -42.987 | -27.868 | -1.709 | 1.00  | 64.33 | H0    |    |
| ANISOU | 349 | HG2  | GLN | A | 22 | 9470    | 8170    | 6800   | -1130 | 1130  | -1460 | H0 |
| ATOM   | 350 | HG3  | GLN | A | 22 | -42.519 | -28.408 | -0.296 | 1.00  | 63.53 | H0    |    |
| ANISOU | 350 | HG3  | GLN | A | 22 | 9390    | 7860    | 6890   | -1100 | 1180  | -1380 | H0 |
| ATOM   | 351 | HE21 | GLN | A | 22 | -40.250 | -30.431 | -1.492 | 1.00  | 65.88 | H0    |    |
| ANISOU | 351 | HE21 | GLN | A | 22 | 9980    | 7730    | 7320   | -1080 | 1500  | -1510 | H0 |
| ATOM   | 352 | HE22 | GLN | A | 22 | -40.399 | -29.015 | -0.928 | 1.00  | 64.22 | H0    |    |
| ANISOU | 352 | HE22 | GLN | A | 22 | 9630    | 7670    | 7090   | -970  | 1370  | -1370 | H0 |
| ATOM   | 353 | N    | ARG | A | 23 | -47.669 | -28.493 | -1.609 | 1.00  | 71.17 | N0    |    |
| ANISOU | 353 | N    | ARG | A | 23 | 10040   | 9680    | 7330   | -1600 | 880   | -1740 | N0 |
| ATOM   | 354 | CA   | ARG | A | 23 | -49.088 | -28.951 | -1.671 | 1.00  | 73.32 | C0    |    |
| ANISOU | 354 | CA   | ARG | A | 23 | 10210   | 10160   | 7490   | -1790 | 830   | -1880 | C0 |
| ATOM   | 355 | C    | ARG | A | 23 | -49.797 | -28.610 | -0.350 | 1.00  | 72.57 | C0    |    |
| ANISOU | 355 | C    | ARG | A | 23 | 9990    | 10120   | 7460   | -1770 | 760   | -1800 | C0 |
| ATOM   | 356 | O    | ARG | A | 23 | -49.764 | -27.430 | 0.054  | 1.00  | 71.17 | O0    |    |
| ANISOU | 356 | O    | ARG | A | 23 | 9720    | 10020   | 7290   | -1590 | 670   | -1660 | O0 |
| ATOM   | 357 | CB   | ARG | A | 23 | -49.153 | -30.445 | -2.011 | 1.00  | 76.26 | C0    |    |
| ANISOU | 357 | CB   | ARG | A | 23 | 10700   | 10410   | 7870   | -2020 | 960   | -2050 | C0 |
| ATOM   | 358 | CG   | ARG | A | 23 | -48.849 | -30.777 | -3.466 | 1.00  | 78.50 | C0    |    |
| ANISOU | 358 | CG   | ARG | A | 23 | 11070   | 10720   | 8030   | -2080 | 1000  | -2180 | C0 |
| ATOM   | 359 | CD   | ARG | A | 23 | -47.437 | -31.280 | -3.713 | 1.00  | 78.58 | C0    |    |
| ANISOU | 359 | CD   | ARG | A | 23 | 11270   | 10440   | 8150   | -2010 | 1140  | -2160 | C0 |
| ATOM   | 360 | NE   | ARG | A | 23 | -47.349 | -32.061 | -4.946 | 1.00  | 80.45 | N0    |    |
| ANISOU | 360 | NE   | ARG | A | 23 | 11610   | 10670   | 8280   | -2150 | 1220  | -2330 | N0 |
| ATOM   | 361 | CZ   | ARG | A | 23 | -47.775 | -33.317 | -5.095 | 1.00  | 81.96 | C0    |    |
| ANISOU | 361 | CZ   | ARG | A | 23 | 11890   | 10790   | 8460   | -2390 | 1330  | -2510 | C0 |
| ATOM   | 362 | NH1  | ARG | A | 23 | -47.637 | -33.921 | -6.263 | 1.00  | 83.63 | N0    |    |
| ANISOU | 362 | NH1  | ARG | A | 23 | 12200   | 11000   | 8570   | -2500 | 1400  | -2670 | N0 |
| ATOM   | 363 | NH2  | ARG | A | 23 | -48.341 | -33.965 | -4.090 | 1.00  | 82.24 | N0    |    |
| ANISOU | 363 | NH2  | ARG | A | 23 | 11920   | 10740   | 8590   | -2510 | 1360  | -2530 | N0 |
| ATOM   | 364 | H    | ARG | A | 23 | -47.443 | -27.963 | -2.314 | 1.00  | 70.74 | H0    |    |
| ANISOU | 364 | H    | ARG | A | 23 | 9980    | 9700    | 7200   | -1530 | 840   | -1730 | H0 |
| ATOM   | 365 | HA   | ARG | A | 23 | -49.533 | -28.450 | -2.393 | 1.00  | 74.01 | H0    |    |
| ANISOU | 365 | HA   | ARG | A | 23 | 10230   | 10450   | 7440   | -1780 | 750   | -1900 | H0 |
| ATOM   | 366 | HB2  | ARG | A | 23 | -48.523 | -30.926 | -1.436 | 1.00  | 75.65 | H0    |    |
| ANISOU | 366 | HB2  | ARG | A | 23 | 10720   | 10100   | 7920   | -2010 | 1040  | -2010 | H0 |
| ATOM   | 367 | HB3  | ARG | A | 23 | -50.054 | -30.772 | -1.808 | 1.00  | 77.03 | H0    |    |
| ANISOU | 367 | HB3  | ARG | A | 23 | 10730   | 10620   | 7920   | -2160 | 930   | -2130 | H0 |
| ATOM   | 368 | HG2  | ARG | A | 23 | -49.482 | -31.461 | -3.772 | 1.00  | 79.84 | H0    |    |
| ANISOU | 368 | HG2  | ARG | A | 23 | 11240   | 10960   | 8130   | -2260 | 1020  | -2310 | H0 |
| ATOM   | 369 | HG3  | ARG | A | 23 | -48.994 | -29.976 | -4.012 | 1.00  | 78.24 | H0    |    |
| ANISOU | 369 | HG3  | ARG | A | 23 | 10970   | 10870   | 7890   | -2000 | 910   | -2140 | H0 |
| ATOM   | 370 | HD2  | ARG | A | 23 | -46.828 | -30.513 | -3.774 | 1.00  | 77.36 | H0    |    |
| ANISOU | 370 | HD2  | ARG | A | 23 | 11100   | 10270   | 8020   | -1850 | 1110  | -2050 | H0 |
| ATOM   | 371 | HD3  | ARG | A | 23 | -47.149 | -31.833 | -2.957 | 1.00  | 78.18 | H0    |    |
| ANISOU | 371 | HD3  | ARG | A | 23 | 11280   | 10200   | 8230   | -2030 | 1220  | -2130 | H0 |
| ATOM   | 372 | HE   | ARG | A | 23 | -46.983 | -31.678 | -5.639 | 1.00  | 80.35 | H0    |    |
| ANISOU | 372 | HE   | ARG | A | 23 | 11610   | 10710   | 8210   | -2090 | 1210  | -2330 | H0 |
| ATOM   | 373 | HH11 | ARG | A | 23 | -47.264 | -33.496 | -6.936 | 1.00  | 83.53 | H0    |    |
| ANISOU | 373 | HH11 | ARG | A | 23 | 12200   | 11050   | 8500   | -2430 | 1380  | -2660 | H0 |
| ATOM   | 374 | HH12 | ARG | A | 23 | -47.919 | -34.747 | -6.365 | 1.00  | 84.91 | H0    |    |
| ANISOU | 374 | HH12 | ARG | A | 23 | 12430   | 11110   | 8730   | -2660 | 1480  | -2790 | H0 |

|        |     |      |     |   |    |         |         |        |       |       |       |    |
|--------|-----|------|-----|---|----|---------|---------|--------|-------|-------|-------|----|
| ATOM   | 375 | HH21 | ARG | A | 23 | -48.439 | -33.576 | -3.308 | 1.00  | 81.18 | H0    |    |
| ANISOU | 375 | HH21 | ARG | A | 23 | 11720   | 10600   | 8520   | -2430 | 1320  | -2420 | H0 |
| ATOM   | 376 | HH22 | ARG | A | 23 | -48.618 | -34.794 | -4.205 | 1.00  | 83.53 | H0    |    |
| ANISOU | 376 | HH22 | ARG | A | 23 | 12160   | 10840   | 8740   | -2670 | 1440  | -2640 | H0 |
| ATOM   | 377 | N    | ASP | A | 24 | -50.393 | -29.607 | 0.311  | 1.00  | 73.90 | N0    |    |
| ANISOU | 377 | N    | ASP | A | 24 | 10160   | 10240   | 7680   | -1960 | 820   | -1880 | N0 |
| ATOM   | 378 | CA   | ASP | A | 24 | -51.253 | -29.431 | 1.513  | 1.00  | 73.93 | C0    |    |
| ANISOU | 378 | CA   | ASP | A | 24 | 10040   | 10330   | 7720   | -1990 | 770   | -1840 | C0 |
| ATOM   | 379 | C    | ASP | A | 24 | -50.428 | -29.638 | 2.791  | 1.00  | 70.42 | C0    |    |
| ANISOU | 379 | C    | ASP | A | 24 | 9690    | 9600    | 7470   | -1910 | 850   | -1710 | C0 |
| ATOM   | 380 | O    | ASP | A | 24 | -51.000 | -29.476 | 3.889  | 1.00  | 70.80 | O0    |    |
| ANISOU | 380 | O    | ASP | A | 24 | 9650    | 9690    | 7560   | -1920 | 820   | -1660 | O0 |
| ATOM   | 381 | CB   | ASP | A | 24 | -52.443 | -30.395 | 1.461  | 1.00  | 77.72 | C0    |    |
| ANISOU | 381 | CB   | ASP | A | 24 | 10470   | 10930   | 8120   | -2270 | 800   | -2010 | C0 |
| ATOM   | 382 | CG   | ASP | A | 24 | -52.047 | -31.838 | 1.193  | 1.00  | 80.72 | C0    |    |
| ANISOU | 382 | CG   | ASP | A | 24 | 11050   | 11080   | 8550   | -2460 | 960   | -2140 | C0 |
| ATOM   | 383 | OD1  | ASP | A | 24 | -51.246 | -32.383 | 1.980  | 1.00  | 81.83 | O0    |    |
| ANISOU | 383 | OD1  | ASP | A | 24 | 11330   | 10920   | 8850   | -2430 | 1070  | -2060 | O0 |
| ATOM   | 384 | OD2  | ASP | A | 24 | -52.526 | -32.401 | 0.185  | 1.00  | 83.56 | O0    |    |
| ANISOU | 384 | OD2  | ASP | A | 24 | 11410   | 11550   | 8780   | -2640 | 980   | -2310 | O0 |
| ATOM   | 385 | H    | ASP | A | 24 | -50.274 | -30.477 | 0.087  | 1.00  | 74.77 | H0    |    |
| ANISOU | 385 | H    | ASP | A | 24 | 10370   | 10240   | 7800   | -2080 | 910   | -1970 | H0 |
| ATOM   | 386 | HA   | ASP | A | 24 | -51.603 | -28.509 | 1.512  | 1.00  | 73.29 | H0    |    |
| ANISOU | 386 | HA   | ASP | A | 24 | 9850    | 10410   | 7580   | -1880 | 670   | -1780 | H0 |
| ATOM   | 387 | HB2  | ASP | A | 24 | -52.922 | -30.360 | 2.314  | 1.00  | 77.45 | H0    |    |
| ANISOU | 387 | HB2  | ASP | A | 24 | 10370   | 10930   | 8130   | -2290 | 790   | -1980 | H0 |
| ATOM   | 388 | HB3  | ASP | A | 24 | -53.056 | -30.106 | 0.754  | 1.00  | 78.56 | H0    |    |
| ANISOU | 388 | HB3  | ASP | A | 24 | 10490   | 11270   | 8090   | -2300 | 730   | -2090 | H0 |
| ATOM   | 389 | N    | ARG | A | 25 | -49.134 | -29.955 | 2.653  | 1.00  | 67.29 | N0    |    |
| ANISOU | 389 | N    | ARG | A | 25 | 9450    | 8950    | 7170   | -1820 | 940   | -1660 | N0 |
| ATOM   | 390 | CA   | ARG | A | 25 | -48.276 | -30.514 | 3.733  | 1.00  | 64.66 | C0    |    |
| ANISOU | 390 | CA   | ARG | A | 25 | 9230    | 8330    | 7010   | -1770 | 1040  | -1560 | C0 |
| ATOM   | 391 | C    | ARG | A | 25 | -47.540 | -29.400 | 4.473  | 1.00  | 58.02 | C0    |    |
| ANISOU | 391 | C    | ARG | A | 25 | 8340    | 7460    | 6250   | -1540 | 980   | -1380 | C0 |
| ATOM   | 392 | O    | ARG | A | 25 | -47.252 | -28.348 | 3.906  | 1.00  | 56.20 | O0    |    |
| ANISOU | 392 | O    | ARG | A | 25 | 8050    | 7340    | 5970   | -1410 | 900   | -1330 | O0 |
| ATOM   | 393 | CB   | ARG | A | 25 | -47.266 | -31.502 | 3.143  | 1.00  | 67.79 | C0    |    |
| ANISOU | 393 | CB   | ARG | A | 25 | 9820    | 8480    | 7460   | -1790 | 1180  | -1610 | C0 |
| ATOM   | 394 | CG   | ARG | A | 25 | -47.893 | -32.705 | 2.456  | 1.00  | 71.95 | C0    |    |
| ANISOU | 394 | CG   | ARG | A | 25 | 10430   | 8990    | 7920   | -2040 | 1270  | -1800 | C0 |
| ATOM   | 395 | CD   | ARG | A | 25 | -46.820 | -33.535 | 1.783  | 1.00  | 75.35 | C0    |    |
| ANISOU | 395 | CD   | ARG | A | 25 | 11050   | 9170    | 8410   | -2020 | 1410  | -1850 | C0 |
| ATOM   | 396 | NE   | ARG | A | 25 | -45.864 | -34.062 | 2.753  | 1.00  | 77.23 | N0    |    |
| ANISOU | 396 | NE   | ARG | A | 25 | 11410   | 9120    | 8810   | -1920 | 1510  | -1740 | N0 |
| ATOM   | 397 | CZ   | ARG | A | 25 | -44.551 | -34.204 | 2.552  | 1.00  | 79.10 | C0    |    |
| ANISOU | 397 | CZ   | ARG | A | 25 | 11750   | 9170    | 9140   | -1760 | 1580  | -1680 | C0 |
| ATOM   | 398 | NH1  | ARG | A | 25 | -43.790 | -34.699 | 3.515  | 1.00  | 79.39 | N0    |    |
| ANISOU | 398 | NH1  | ARG | A | 25 | 11870   | 8970    | 9320   | -1660 | 1660  | -1570 | N0 |
| ATOM   | 399 | NH2  | ARG | A | 25 | -43.993 | -33.844 | 1.406  | 1.00  | 79.73 | N0    |    |
| ANISOU | 399 | NH2  | ARG | A | 25 | 11840   | 9300    | 9160   | -1690 | 1580  | -1720 | N0 |
| ATOM   | 400 | H    | ARG | A | 25 | -48.685 | -29.834 | 1.872  | 1.00  | 67.54 | H0    |    |
| ANISOU | 400 | H    | ARG | A | 25 | 9520    | 8970    | 7160   | -1780 | 950   | -1680 | H0 |
| ATOM   | 401 | HA   | ARG | A | 25 | -48.854 | -30.992 | 4.369  | 1.00  | 64.96 | H0    |    |
| ANISOU | 401 | HA   | ARG | A | 25 | 9260    | 8360    | 7070   | -1880 | 1060  | -1590 | H0 |

|        |     |      |     |   |    |         |         |       |       |       |       |    |
|--------|-----|------|-----|---|----|---------|---------|-------|-------|-------|-------|----|
| ATOM   | 402 | HB2  | ARG | A | 25 | -46.706 | -31.025 | 2.496 | 1.00  | 67.25 | H0    |    |
| ANISOU | 402 | HB2  | ARG | A | 25 | 9750    | 8430    | 7370  | -1700 | 1160  | -1590 | H0 |
| ATOM   | 403 | HB3  | ARG | A | 25 | -46.685 | -31.819 | 3.865 | 1.00  | 67.18 | H0    |    |
| ANISOU | 403 | HB3  | ARG | A | 25 | 9810    | 8220    | 7500  | -1740 | 1240  | -1540 | H0 |
| ATOM   | 404 | HG2  | ARG | A | 25 | -48.365 | -33.255 | 3.117 | 1.00  | 72.59 | H0    |    |
| ANISOU | 404 | HG2  | ARG | A | 25 | 10530   | 9020    | 8040  | -2140 | 1310  | -1820 | H0 |
| ATOM   | 405 | HG3  | ARG | A | 25 | -48.541 | -32.404 | 1.784 | 1.00  | 72.65 | H0    |    |
| ANISOU | 405 | HG3  | ARG | A | 25 | 10440   | 9270    | 7890  | -2100 | 1210  | -1880 | H0 |
| ATOM   | 406 | HD2  | ARG | A | 25 | -47.240 | -34.281 | 1.304 | 1.00  | 76.73 | H0    |    |
| ANISOU | 406 | HD2  | ARG | A | 25 | 11280   | 9340    | 8530  | -2190 | 1470  | -1980 | H0 |
| ATOM   | 407 | HD3  | ARG | A | 25 | -46.352 | -32.979 | 1.126 | 1.00  | 74.81 | H0    |    |
| ANISOU | 407 | HD3  | ARG | A | 25 | 10960   | 9160    | 8300  | -1920 | 1380  | -1840 | H0 |
| ATOM   | 408 | HE   | ARG | A | 25 | -46.177 | -34.315 | 3.527 | 1.00  | 77.32 | H0    |    |
| ANISOU | 408 | HE   | ARG | A | 25 | 11420   | 9090    | 8870  | -1960 | 1520  | -1710 | H0 |
| ATOM   | 409 | HH11 | ARG | A | 25 | -44.150 | -34.937 | 4.281 | 1.00  | 79.11 | H0    |    |
| ANISOU | 409 | HH11 | ARG | A | 25 | 11840   | 8900    | 9320  | -1700 | 1670  | -1530 | H0 |
| ATOM   | 410 | HH12 | ARG | A | 25 | -42.924 | -34.790 | 3.388 | 1.00  | 78.92 | H0    |    |
| ANISOU | 410 | HH12 | ARG | A | 25 | 11870   | 8800    | 9310  | -1550 | 1710  | -1530 | H0 |
| ATOM   | 411 | HH21 | ARG | A | 25 | -44.483 | -33.516 | 0.755 | 1.00  | 79.65 | H0    |    |
| ANISOU | 411 | HH21 | ARG | A | 25 | 11770   | 9450    | 9050  | -1750 | 1530  | -1790 | H0 |
| ATOM   | 412 | HH22 | ARG | A | 25 | -43.125 | -33.944 | 1.292 | 1.00  | 79.21 | H0    |    |
| ANISOU | 412 | HH22 | ARG | A | 25 | 11830   | 9110    | 9150  | -1590 | 1640  | -1680 | H0 |
| ATOM   | 413 | N    | PRO | A | 26 | -47.193 | -29.612 | 5.762 | 1.00  | 53.25 | N0    |    |
| ANISOU | 413 | N    | PRO | A | 26 | 7760    | 6700    | 5770  | -1500 | 1010  | -1280 | N0 |
| ATOM   | 414 | CA   | PRO | A | 26 | -46.496 | -28.598 | 6.549 | 1.00  | 49.78 | C0    |    |
| ANISOU | 414 | CA   | PRO | A | 26 | 7270    | 6240    | 5400  | -1300 | 960   | -1120 | C0 |
| ATOM   | 415 | C    | PRO | A | 26 | -44.990 | -28.495 | 6.261 | 1.00  | 47.03 | C0    |    |
| ANISOU | 415 | C    | PRO | A | 26 | 7010    | 5720    | 5130  | -1150 | 1010  | -1050 | C0 |
| ATOM   | 416 | O    | PRO | A | 26 | -44.403 | -29.446 | 5.796 | 1.00  | 47.19 | O0    |    |
| ANISOU | 416 | O    | PRO | A | 26 | 7160    | 5580    | 5190  | -1190 | 1120  | -1100 | O0 |
| ATOM   | 417 | CB   | PRO | A | 26 | -46.716 | -29.063 | 8.000 | 1.00  | 49.87 | C0    |    |
| ANISOU | 417 | CB   | PRO | A | 26 | 7280    | 6160    | 5500  | -1340 | 990   | -1060 | C0 |
| ATOM   | 418 | CG   | PRO | A | 26 | -46.873 | -30.569 | 7.900 | 1.00  | 51.68 | C0    |    |
| ANISOU | 418 | CG   | PRO | A | 26 | 7650    | 6230    | 5750  | -1510 | 1110  | -1150 | C0 |
| ATOM   | 419 | CD   | PRO | A | 26 | -47.485 | -30.827 | 6.538 | 1.00  | 53.61 | C0    |    |
| ANISOU | 419 | CD   | PRO | A | 26 | 7890    | 6600    | 5880  | -1650 | 1110  | -1310 | C0 |
| ATOM   | 420 | HA   | PRO | A | 26 | -46.931 | -27.719 | 6.415 | 1.00  | 49.30 | H0    |    |
| ANISOU | 420 | HA   | PRO | A | 26 | 7110    | 6340    | 5280  | -1260 | 870   | -1100 | H0 |
| ATOM   | 421 | HB2  | PRO | A | 26 | -45.948 | -28.831 | 8.564 | 1.00  | 49.00 | H0    |    |
| ANISOU | 421 | HB2  | PRO | A | 26 | 7190    | 5950    | 5470  | -1230 | 1000  | -960  | H0 |
| ATOM   | 422 | HB3  | PRO | A | 26 | -47.521 | -28.655 | 8.380 | 1.00  | 49.74 | H0    |    |
| ANISOU | 422 | HB3  | PRO | A | 26 | 7170    | 6280    | 5440  | -1370 | 930   | -1060 | H0 |
| ATOM   | 423 | HG2  | PRO | A | 26 | -46.004 | -31.013 | 7.977 | 1.00  | 51.75 | H0    |    |
| ANISOU | 423 | HG2  | PRO | A | 26 | 7760    | 6070    | 5840  | -1450 | 1180  | -1110 | H0 |
| ATOM   | 424 | HG3  | PRO | A | 26 | -47.459 | -30.903 | 8.610 | 1.00  | 52.12 | H0    |    |
| ANISOU | 424 | HG3  | PRO | A | 26 | 7690    | 6290    | 5820  | -1600 | 1130  | -1150 | H0 |
| ATOM   | 425 | HD2  | PRO | A | 26 | -47.083 | -31.611 | 6.120 | 1.00  | 54.43 | H0    |    |
| ANISOU | 425 | HD2  | PRO | A | 26 | 8110    | 6560    | 6010  | -1700 | 1200  | -1370 | H0 |
| ATOM   | 426 | HD3  | PRO | A | 26 | -48.446 | -30.969 | 6.612 | 1.00  | 54.32 | H0    |    |
| ANISOU | 426 | HD3  | PRO | A | 26 | 7920    | 6810    | 5910  | -1770 | 1090  | -1380 | H0 |
| ATOM   | 427 | N    | VAL | A | 27 | -44.405 | -27.336 | 6.562 | 1.00  | 44.42 | N0    |    |
| ANISOU | 427 | N    | VAL | A | 27 | 6620    | 5430    | 4830  | -990  | 950   | -940  | N0 |
| ATOM   | 428 | CA   | VAL | A | 27 | -42.928 | -27.150 | 6.667 | 1.00  | 43.35 | C0    |    |
| ANISOU | 428 | CA   | VAL | A | 27 | 6540    | 5150    | 4790  | -840  | 1000  | -850  | C0 |

|        |     |      |          |         |         |        |      |       |      |    |
|--------|-----|------|----------|---------|---------|--------|------|-------|------|----|
| ATOM   | 429 | C    | VAL A 27 | -42.477 | -27.855 | 7.948  | 1.00 | 42.74 | C0   |    |
| ANISOU | 429 | C    | VAL A 27 | 6500    | 4910    | 4830   | -820 | 1050  | -770 | C0 |
| ATOM   | 430 | O    | VAL A 27 | -42.898 | -27.421 | 9.038  | 1.00 | 42.12 | O0   |    |
| ANISOU | 430 | O    | VAL A 27 | 6350    | 4880    | 4770   | -810 | 990   | -700 | O0 |
| ATOM   | 431 | CB   | VAL A 27 | -42.531 | -25.661 | 6.672  | 1.00 | 41.54 | C0   |    |
| ANISOU | 431 | CB   | VAL A 27 | 6220    | 5020    | 4540   | -700 | 920   | -760 | C0 |
| ATOM   | 432 | CG1  | VAL A 27 | -41.040 | -25.480 | 6.893  | 1.00 | 40.74 | C0   |    |
| ANISOU | 432 | CG1  | VAL A 27 | 6160    | 4790    | 4530   | -580 | 970   | -680 | C0 |
| ATOM   | 433 | CG2  | VAL A 27 | -42.974 | -24.959 | 5.400  | 1.00 | 42.48 | C0   |    |
| ANISOU | 433 | CG2  | VAL A 27 | 6320    | 5290    | 4530   | -710 | 870   | -820 | C0 |
| ATOM   | 434 | H    | VAL A 27 | -44.881 | -26.579 | 6.735  | 1.00 | 44.17 | H0   |    |
| ANISOU | 434 | H    | VAL A 27 | 6500    | 5520    | 4760   | -960 | 880   | -910 | H0 |
| ATOM   | 435 | HA   | VAL A 27 | -42.507 | -27.583 | 5.904  | 1.00 | 43.82 | H0   |    |
| ANISOU | 435 | HA   | VAL A 27 | 6660    | 5150    | 4840   | -860 | 1050  | -900 | H0 |
| ATOM   | 436 | HB   | VAL A 27 | -43.001 | -25.234 | 7.430  | 1.00 | 41.23 | H0   |    |
| ANISOU | 436 | HB   | VAL A 27 | 6120    | 5040    | 4510   | -690 | 860   | -720 | H0 |
| ATOM   | 437 | HG11 | VAL A 27 | -40.830 | -25.619 | 7.833  | 1.00 | 40.44 | H0   |    |
| ANISOU | 437 | HG11 | VAL A 27 | 6110    | 4690    | 4560   | -550 | 970   | -620 | H0 |
| ATOM   | 438 | HG12 | VAL A 27 | -40.780 | -24.578 | 6.635  | 1.00 | 40.24 | H0   |    |
| ANISOU | 438 | HG12 | VAL A 27 | 6060    | 4780    | 4450   | -510 | 930   | -650 | H0 |
| ATOM   | 439 | HG13 | VAL A 27 | -40.551 | -26.124 | 6.352  | 1.00 | 41.39 | H0   |    |
| ANISOU | 439 | HG13 | VAL A 27 | 6310    | 4780    | 4630   | -590 | 1040  | -720 | H0 |
| ATOM   | 440 | HG21 | VAL A 27 | -42.604 | -25.421 | 4.628  | 1.00 | 42.88 | H0   |    |
| ANISOU | 440 | HG21 | VAL A 27 | 6430    | 5290    | 4570   | -730 | 920   | -870 | H0 |
| ATOM   | 441 | HG22 | VAL A 27 | -42.658 | -24.039 | 5.408  | 1.00 | 41.59 | H0   |    |
| ANISOU | 441 | HG22 | VAL A 27 | 6170    | 5220    | 4410   | -620 | 830   | -760 | H0 |
| ATOM   | 442 | HG23 | VAL A 27 | -43.945 | -24.966 | 5.346  | 1.00 | 42.70 | H0   |    |
| ANISOU | 442 | HG23 | VAL A 27 | 6300    | 5430    | 4490   | -770 | 820   | -860 | H0 |
| ATOM   | 443 | N    | ALA A 28 | -41.680 | -28.917 | 7.823  | 1.00 | 43.24 | N0   |    |
| ANISOU | 443 | N    | ALA A 28 | 6680    | 4780    | 4960   | -820 | 1160  | -790 | N0 |
| ATOM   | 444 | CA   | ALA A 28 | -41.115 | -29.664 | 8.968  | 1.00 | 43.06 | C0   |    |
| ANISOU | 444 | CA   | ALA A 28 | 6720    | 4590    | 5050   | -770 | 1220  | -700 | C0 |
| ATOM   | 445 | C    | ALA A 28 | -39.967 | -28.843 | 9.559  | 1.00 | 41.86 | C0   |    |
| ANISOU | 445 | C    | ALA A 28 | 6510    | 4440    | 4960   | -590 | 1190  | -580 | C0 |
| ATOM   | 446 | O    | ALA A 28 | -38.891 | -28.787 | 8.934  | 1.00 | 42.05 | O0   |    |
| ANISOU | 446 | O    | ALA A 28 | 6550    | 4410    | 5020   | -490 | 1230  | -570 | O0 |
| ATOM   | 447 | CB   | ALA A 28 | -40.677 | -31.045 | 8.541  | 1.00 | 44.22 | C0   |    |
| ANISOU | 447 | CB   | ALA A 28 | 7030    | 4530    | 5240   | -800 | 1360  | -760 | C0 |
| ATOM   | 448 | H    | ALA A 28 | -41.422 | -29.260 | 7.019  | 1.00 | 43.82 | H0   |    |
| ANISOU | 448 | H    | ALA A 28 | 6810    | 4810    | 5020   | -830 | 1210  | -850 | H0 |
| ATOM   | 449 | HA   | ALA A 28 | -41.814 | -29.755 | 9.653  | 1.00 | 43.07 | H0   |    |
| ANISOU | 449 | HA   | ALA A 28 | 6700    | 4620    | 5040   | -830 | 1200  | -690 | H0 |
| ATOM   | 450 | HB1  | ALA A 28 | -40.299 | -31.516 | 9.302  | 1.00 | 44.55 | H0   |    |
| ANISOU | 450 | HB1  | ALA A 28 | 7110    | 4460    | 5350   | -750 | 1400  | -700 | H0 |
| ATOM   | 451 | HB2  | ALA A 28 | -41.443 | -31.539 | 8.203  | 1.00 | 45.14 | H0   |    |
| ANISOU | 451 | HB2  | ALA A 28 | 7180    | 4660    | 5310   | -930 | 1380  | -850 | H0 |
| ATOM   | 452 | HB3  | ALA A 28 | -40.006 | -30.972 | 7.841  | 1.00 | 44.40 | H0   |    |
| ANISOU | 452 | HB3  | ALA A 28 | 7070    | 4530    | 5270   | -740 | 1390  | -780 | H0 |
| ATOM   | 453 | N    | VAL A 29 | -40.213 | -28.188 | 10.696 | 1.00 | 40.82 | N0   |    |
| ANISOU | 453 | N    | VAL A 29 | 6290    | 4380    | 4840   | -560 | 1110  | -490 | N0 |
| ATOM   | 454 | CA   | VAL A 29 | -39.201 | -27.365 | 11.421 | 1.00 | 40.15 | C0   |    |
| ANISOU | 454 | CA   | VAL A 29 | 6130    | 4310    | 4810   | -410 | 1070  | -380 | C0 |
| ATOM   | 455 | C    | VAL A 29 | -38.603 | -28.217 | 12.549 | 1.00 | 41.36 | C0   |    |
| ANISOU | 455 | C    | VAL A 29 | 6330    | 4340    | 5050   | -350 | 1120  | -290 | C0 |

|        |     |      |          |         |         |        |      |       |      |    |
|--------|-----|------|----------|---------|---------|--------|------|-------|------|----|
| ATOM   | 456 | O    | VAL A 29 | -39.380 | -28.839 | 13.308 | 1.00 | 41.25 | OO   |    |
| ANISOU | 456 | O    | VAL A 29 | 6350    | 4290    | 5030   | -430 | 1130  | -280 | OO |
| ATOM   | 457 | CB   | VAL A 29 | -39.811 | -26.053 | 11.950 | 1.00 | 39.23 | CO   |    |
| ANISOU | 457 | CB   | VAL A 29 | 5890    | 4360    | 4650   | -410 | 960   | -340 | CO |
| ATOM   | 458 | CG1  | VAL A 29 | -38.781 | -25.208 | 12.683 | 1.00 | 38.50 | CO   |    |
| ANISOU | 458 | CG1  | VAL A 29 | 5730    | 4290    | 4600   | -280 | 930   | -250 | CO |
| ATOM   | 459 | CG2  | VAL A 29 | -40.470 | -25.247 | 10.841 | 1.00 | 39.14 | CO   |    |
| ANISOU | 459 | CG2  | VAL A 29 | 5850    | 4480    | 4540   | -450 | 920   | -420 | CO |
| ATOM   | 460 | H    | VAL A 29 | -41.027 | -28.201 | 11.104 | 1.00 | 40.95 | H0   |    |
| ANISOU | 460 | H    | VAL A 29 | 6280    | 4450    | 4830   | -630 | 1080  | -500 | H0 |
| ATOM   | 461 | HA   | VAL A 29 | -38.489 | -27.139 | 10.797 | 1.00 | 40.21 | H0   |    |
| ANISOU | 461 | HA   | VAL A 29 | 6140    | 4310    | 4830   | -350 | 1090  | -390 | H0 |
| ATOM   | 462 | HB   | VAL A 29 | -40.514 | -26.298 | 12.600 | 1.00 | 39.35 | H0   |    |
| ANISOU | 462 | HB   | VAL A 29 | 5900    | 4390    | 4660   | -460 | 950   | -340 | H0 |
| ATOM   | 463 | HG11 | VAL A 29 | -38.589 | -25.607 | 13.549 | 1.00 | 38.59 | H0   |    |
| ANISOU | 463 | HG11 | VAL A 29 | 5750    | 4260    | 4650   | -260 | 940   | -190 | H0 |
| ATOM   | 464 | HG12 | VAL A 29 | -39.130 | -24.309 | 12.812 | 1.00 | 37.83 | H0   |    |
| ANISOU | 464 | HG12 | VAL A 29 | 5590    | 4300    | 4480   | -280 | 870   | -240 | H0 |
| ATOM   | 465 | HG13 | VAL A 29 | -37.963 | -25.165 | 12.158 | 1.00 | 38.54 | H0   |    |
| ANISOU | 465 | HG13 | VAL A 29 | 5750    | 4260    | 4630   | -230 | 960   | -250 | H0 |
| ATOM   | 466 | HG21 | VAL A 29 | -39.827 | -25.087 | 10.128 | 1.00 | 39.12 | H0   |    |
| ANISOU | 466 | HG21 | VAL A 29 | 5860    | 4460    | 4540   | -410 | 940   | -430 | H0 |
| ATOM   | 467 | HG22 | VAL A 29 | -40.777 | -24.395 | 11.196 | 1.00 | 38.46 | H0   |    |
| ANISOU | 467 | HG22 | VAL A 29 | 5690    | 4490    | 4430   | -430 | 860   | -390 | H0 |
| ATOM   | 468 | HG23 | VAL A 29 | -41.230 | -25.741 | 10.486 | 1.00 | 39.70 | H0   |    |
| ANISOU | 468 | HG23 | VAL A 29 | 5940    | 4570    | 4570   | -540 | 930   | -480 | H0 |
| ATOM   | 469 | N    | SER A 30 | -37.272 | -28.284 | 12.618 | 1.00 | 42.32 | N0   |    |
| ANISOU | 469 | N    | SER A 30 | 6450    | 4390    | 5230   | -210 | 1150  | -230 | N0 |
| ATOM   | 470 | CA   | SER A 30 | -36.506 | -28.855 | 13.753 | 1.00 | 43.83 | CO   |    |
| ANISOU | 470 | CA   | SER A 30 | 6660    | 4500    | 5500   | -110 | 1180  | -120 | CO |
| ATOM   | 471 | C    | SER A 30 | -36.125 | -27.707 | 14.687 | 1.00 | 43.89 | CO   |    |
| ANISOU | 471 | C    | SER A 30 | 6530    | 4640    | 5500   | -40  | 1080  | -40  | CO |
| ATOM   | 472 | O    | SER A 30 | -35.637 | -26.675 | 14.184 | 1.00 | 43.29 | OO   |    |
| ANISOU | 472 | O    | SER A 30 | 6380    | 4660    | 5410   | 0    | 1050  | -60  | OO |
| ATOM   | 473 | CB   | SER A 30 | -35.292 | -29.609 | 13.299 | 1.00 | 44.68 | CO   |    |
| ANISOU | 473 | CB   | SER A 30 | 6830    | 4480    | 5670   | 10   | 1270  | -110 | CO |
| ATOM   | 474 | OG   | SER A 30 | -35.656 | -30.653 | 12.418 | 1.00 | 46.91 | OO   |    |
| ANISOU | 474 | OG   | SER A 30 | 7250    | 4630    | 5950   | -60  | 1370  | -200 | OO |
| ATOM   | 475 | H    | SER A 30 | -36.725 | -27.977 | 11.956 | 1.00 | 42.24 | H0   |    |
| ANISOU | 475 | H    | SER A 30 | 6430    | 4400    | 5220   | -170 | 1170  | -250 | H0 |
| ATOM   | 476 | HA   | SER A 30 | -37.100 | -29.479 | 14.245 | 1.00 | 44.32 | H0   |    |
| ANISOU | 476 | HA   | SER A 30 | 6780    | 4500    | 5560   | -160 | 1200  | -110 | H0 |
| ATOM   | 477 | HB2  | SER A 30 | -34.677 | -28.994 | 12.846 | 1.00 | 44.53 | H0   |    |
| ANISOU | 477 | HB2  | SER A 30 | 6750    | 4530    | 5650   | 70   | 1250  | -120 | H0 |
| ATOM   | 478 | HB3  | SER A 30 | -34.829 | -29.985 | 14.082 | 1.00 | 45.36 | H0   |    |
| ANISOU | 478 | HB3  | SER A 30 | 6920    | 4520    | 5790   | 100  | 1280  | -30  | H0 |
| ATOM   | 479 | N    | VAL A 31 | -36.382 | -27.876 | 15.983 | 1.00 | 44.64 | N0   |    |
| ANISOU | 479 | N    | VAL A 31 | 6620    | 4740    | 5600   | -30  | 1050  | 40   | N0 |
| ATOM   | 480 | CA   | VAL A 31 | -36.075 | -26.875 | 17.043 | 1.00 | 45.17 | CO   |    |
| ANISOU | 480 | CA   | VAL A 31 | 6560    | 4940    | 5660   | 20   | 970   | 120  | CO |
| ATOM   | 481 | C    | VAL A 31 | -35.383 | -27.611 | 18.186 | 1.00 | 46.80 | CO   |    |
| ANISOU | 481 | C    | VAL A 31 | 6790    | 5090    | 5900   | 120  | 980   | 230  | CO |
| ATOM   | 482 | O    | VAL A 31 | -35.946 | -28.614 | 18.671 | 1.00 | 49.59 | OO   |    |
| ANISOU | 482 | O    | VAL A 31 | 7240    | 5340    | 6260   | 90   | 1030  | 260  | OO |

|        |     |      |          |         |         |        |      |       |     |    |
|--------|-----|------|----------|---------|---------|--------|------|-------|-----|----|
| ATOM   | 483 | CB   | VAL A 31 | -37.338 | -26.151 | 17.543 | 1.00 | 44.87 | C0  |    |
| ANISOU | 483 | CB   | VAL A 31 | 6480    | 5010    | 5560   | -90  | 900   | 100 | C0 |
| ATOM   | 484 | CG1  | VAL A 31 | -36.983 | -25.014 | 18.485 | 1.00 | 44.66 | C0  |    |
| ANISOU | 484 | CG1  | VAL A 31 | 6340    | 5110    | 5520   | -40  | 820   | 150 | C0 |
| ATOM   | 485 | CG2  | VAL A 31 | -38.192 | -25.641 | 16.396 | 1.00 | 45.02 | C0  |    |
| ANISOU | 485 | CG2  | VAL A 31 | 6500    | 5080    | 5530   | -180 | 890   | -10 | C0 |
| ATOM   | 486 | H    | VAL A 31 | -36.773 | -28.632 | 16.307 | 1.00 | 45.42 | H0  |    |
| ANISOU | 486 | H    | VAL A 31 | 6790    | 4770    | 5710   | -60  | 1090  | 50  | H0 |
| ATOM   | 487 | HA   | VAL A 31 | -35.462 | -26.215 | 16.679 | 1.00 | 44.71 | H0  |    |
| ANISOU | 487 | HA   | VAL A 31 | 6450    | 4940    | 5600   | 70   | 950   | 110 | H0 |
| ATOM   | 488 | HB   | VAL A 31 | -37.875 | -26.808 | 18.051 | 1.00 | 45.49 | H0  |    |
| ANISOU | 488 | HB   | VAL A 31 | 6610    | 5040    | 5640   | -130 | 920   | 120 | H0 |
| ATOM   | 489 | HG11 | VAL A 31 | -36.641 | -25.377 | 19.320 | 1.00 | 44.83 | H0  |    |
| ANISOU | 489 | HG11 | VAL A 31 | 6360    | 5120    | 5560   | 0    | 820   | 220 | H0 |
| ATOM   | 490 | HG12 | VAL A 31 | -37.777 | -24.482 | 18.666 | 1.00 | 43.98 | H0  |    |
| ANISOU | 490 | HG12 | VAL A 31 | 6220    | 5090    | 5400   | -100 | 780   | 130 | H0 |
| ATOM   | 491 | HG13 | VAL A 31 | -36.303 | -24.452 | 18.074 | 1.00 | 44.16 | H0  |    |
| ANISOU | 491 | HG13 | VAL A 31 | 6230    | 5080    | 5470   | 0    | 810   | 140 | H0 |
| ATOM   | 492 | HG21 | VAL A 31 | -37.641 | -25.116 | 15.789 | 1.00 | 44.53 | H0  |    |
| ANISOU | 492 | HG21 | VAL A 31 | 6410    | 5040    | 5470   | -140 | 880   | -30 | H0 |
| ATOM   | 493 | HG22 | VAL A 31 | -38.909 | -25.083 | 16.746 | 1.00 | 44.38 | H0  |    |
| ANISOU | 493 | HG22 | VAL A 31 | 6370    | 5080    | 5410   | -230 | 840   | -10 | H0 |
| ATOM   | 494 | HG23 | VAL A 31 | -38.576 | -26.395 | 15.915 | 1.00 | 45.46 | H0  |    |
| ANISOU | 494 | HG23 | VAL A 31 | 6620    | 5070    | 5580   | -230 | 930   | -50 | H0 |
| ATOM   | 495 | N    | SER A 32 | -34.205 | -27.143 | 18.586 | 1.00 | 47.03 | N0  |    |
| ANISOU | 495 | N    | SER A 32 | 6730    | 5190    | 5950   | 240  | 950   | 290 | N0 |
| ATOM   | 496 | CA   | SER A 32 | -33.520 | -27.579 | 19.826 | 1.00 | 48.73 | C0  |    |
| ANISOU | 496 | CA   | SER A 32 | 6920    | 5410    | 6180   | 350  | 940   | 410 | C0 |
| ATOM   | 497 | C    | SER A 32 | -32.856 | -26.367 | 20.475 | 1.00 | 47.47 | C0  |    |
| ANISOU | 497 | C    | SER A 32 | 6610    | 5430    | 6000   | 390  | 850   | 430 | C0 |
| ATOM   | 498 | O    | SER A 32 | -32.253 | -25.564 | 19.744 | 1.00 | 46.67 | O0  |    |
| ANISOU | 498 | O    | SER A 32 | 6430    | 5400    | 5910   | 400  | 850   | 380 | O0 |
| ATOM   | 499 | CB   | SER A 32 | -32.532 | -28.678 | 19.554 | 1.00 | 51.22 | C0  |    |
| ANISOU | 499 | CB   | SER A 32 | 7300    | 5600    | 6560   | 490  | 1020  | 450 | C0 |
| ATOM   | 500 | OG   | SER A 32 | -31.422 | -28.183 | 18.824 | 1.00 | 52.72 | O0  |    |
| ANISOU | 500 | OG   | SER A 32 | 7400    | 5860    | 6770   | 580  | 1020  | 420 | O0 |
| ATOM   | 501 | H    | SER A 32 | -33.725 | -26.522 | 18.122 | 1.00 | 46.77 | H0  |    |
| ANISOU | 501 | H    | SER A 32 | 6630    | 5210    | 5920   | 260  | 940   | 260 | H0 |
| ATOM   | 502 | HA   | SER A 32 | -34.210 | -27.923 | 20.449 | 1.00 | 48.82 | H0  |    |
| ANISOU | 502 | HA   | SER A 32 | 6980    | 5390    | 6170   | 310  | 930   | 440 | H0 |
| ATOM   | 503 | HB2  | SER A 32 | -32.222 | -29.058 | 20.407 | 1.00 | 52.00 | H0  |    |
| ANISOU | 503 | HB2  | SER A 32 | 7400    | 5700    | 6650   | 570  | 1010  | 540 | H0 |
| ATOM   | 504 | HB3  | SER A 32 | -32.971 | -29.393 | 19.042 | 1.00 | 51.89 | H0  |    |
| ANISOU | 504 | HB3  | SER A 32 | 7490    | 5570    | 6660   | 460  | 1080  | 420 | H0 |
| ATOM   | 505 | N    | LEU A 33 | -32.994 | -26.232 | 21.793 | 1.00 | 46.84 | N0  |    |
| ANISOU | 505 | N    | LEU A 33 | 6490    | 5420    | 5890   | 400  | 800   | 510 | N0 |
| ATOM   | 506 | CA   | LEU A 33 | -32.257 | -25.220 | 22.587 | 1.00 | 45.73 | C0  |    |
| ANISOU | 506 | CA   | LEU A 33 | 6200    | 5460    | 5720   | 440  | 720   | 540 | C0 |
| ATOM   | 507 | C    | LEU A 33 | -30.924 | -25.833 | 23.026 | 1.00 | 46.22 | C0  |    |
| ANISOU | 507 | C    | LEU A 33 | 6220    | 5540    | 5800   | 600  | 730   | 630 | C0 |
| ATOM   | 508 | O    | LEU A 33 | -30.908 | -27.022 | 23.395 | 1.00 | 47.75 | O0  |    |
| ANISOU | 508 | O    | LEU A 33 | 6500    | 5630    | 6010   | 680  | 770   | 710 | O0 |
| ATOM   | 509 | CB   | LEU A 33 | -33.121 | -24.770 | 23.768 | 1.00 | 45.28 | C0  |    |
| ANISOU | 509 | CB   | LEU A 33 | 6130    | 5480    | 5600   | 360  | 660   | 570 | C0 |



|                          |         |         |        |      |       |     |
|--------------------------|---------|---------|--------|------|-------|-----|
| ATOM 510 CG LEU A 33     | -34.523 | -24.294 | 23.395 | 1.00 | 44.50 | C0  |
| ANISOU 510 CG LEU A 33   | 6070    | 5360    | 5470   | 220  | 660   | 490 |
| ATOM 511 CD1 LEU A 33    | -35.179 | -23.569 | 24.557 | 1.00 | 44.82 | C0  |
| ANISOU 511 CD1 LEU A 33  | 6060    | 5510    | 5450   | 150  | 600   | 510 |
| ATOM 512 CD2 LEU A 33    | -34.498 | -23.405 | 22.166 | 1.00 | 44.10 | C0  |
| ANISOU 512 CD2 LEU A 33  | 5990    | 5330    | 5440   | 170  | 660   | 390 |
| ATOM 513 H LEU A 33      | -33.554 | -26.754 | 22.286 | 1.00 | 47.16 | H0  |
| ANISOU 513 H LEU A 33    | 6590    | 5410    | 5910   | 380  | 810   | 550 |
| ATOM 514 HA LEU A 33     | -32.072 | -24.449 | 22.009 | 1.00 | 45.08 | H0  |
| ANISOU 514 HA LEU A 33   | 6070    | 5420    | 5640   | 400  | 710   | 480 |
| ATOM 515 HB2 LEU A 33    | -33.201 | -25.517 | 24.394 | 1.00 | 46.06 | H0  |
| ANISOU 515 HB2 LEU A 33  | 6280    | 5530    | 5690   | 400  | 670   | 640 |
| ATOM 516 HB3 LEU A 33    | -32.658 | -24.043 | 24.231 | 1.00 | 45.12 | H0  |
| ANISOU 516 HB3 LEU A 33  | 6020    | 5570    | 5550   | 370  | 610   | 570 |
| ATOM 517 HG LEU A 33     | -35.069 | -25.089 | 23.182 | 1.00 | 45.04 | H0  |
| ANISOU 517 HG LEU A 33   | 6230    | 5330    | 5550   | 190  | 700   | 490 |
| ATOM 518 HD11 LEU A 33   | -35.196 | -24.152 | 25.336 | 1.00 | 45.20 | H0  |
| ANISOU 518 HD11 LEU A 33 | 6140    | 5550    | 5480   | 180  | 600   | 570 |
| ATOM 519 HD12 LEU A 33   | -36.089 | -23.324 | 24.316 | 1.00 | 44.08 | H0  |
| ANISOU 519 HD12 LEU A 33 | 5990    | 5410    | 5340   | 70   | 600   | 460 |
| ATOM 520 HD13 LEU A 33   | -34.672 | -22.765 | 24.766 | 1.00 | 44.26 | H0  |
| ANISOU 520 HD13 LEU A 33 | 5910    | 5540    | 5370   | 160  | 560   | 500 |
| ATOM 521 HD21 LEU A 33   | -33.730 | -22.810 | 22.210 | 1.00 | 43.83 | H0  |
| ANISOU 521 HD21 LEU A 33 | 5880    | 5360    | 5400   | 210  | 640   | 390 |
| ATOM 522 HD22 LEU A 33   | -35.314 | -22.876 | 22.129 | 1.00 | 43.35 | H0  |
| ANISOU 522 HD22 LEU A 33 | 5900    | 5260    | 5310   | 100  | 640   | 350 |
| ATOM 523 HD23 LEU A 33   | -34.434 | -23.956 | 21.366 | 1.00 | 44.22 | H0  |
| ANISOU 523 HD23 LEU A 33 | 6060    | 5260    | 5480   | 190  | 710   | 370 |
| ATOM 524 N LYS A 34      | -29.841 | -25.063 | 22.900 | 1.00 | 45.22 | N0  |
| ANISOU 524 N LYS A 34    | 5950    | 5550    | 5680   | 650  | 700   | 610 |
| ATOM 525 CA LYS A 34     | -28.490 | -25.411 | 23.407 | 1.00 | 46.10 | C0  |
| ANISOU 525 CA LYS A 34   | 5970    | 5750    | 5800   | 810  | 680   | 680 |
| ATOM 526 C LYS A 34      | -28.124 | -24.361 | 24.457 | 1.00 | 44.51 | C0  |
| ANISOU 526 C LYS A 34    | 5620    | 5760    | 5530   | 770  | 590   | 690 |
| ATOM 527 O LYS A 34      | -27.904 | -23.200 | 24.081 | 1.00 | 42.80 | O0  |
| ANISOU 527 O LYS A 34    | 5310    | 5640    | 5310   | 680  | 580   | 600 |
| ATOM 528 CB LYS A 34     | -27.485 | -25.471 | 22.254 | 1.00 | 47.95 | C0  |
| ANISOU 528 CB LYS A 34   | 6150    | 5980    | 6090   | 880  | 740   | 630 |
| ATOM 529 CG LYS A 34     | -26.230 | -26.287 | 22.531 | 1.00 | 50.99 | C0  |
| ANISOU 529 CG LYS A 34   | 6470    | 6400    | 6500   | 1080 | 760   | 710 |
| ATOM 530 CD LYS A 34     | -26.393 | -27.772 | 22.242 | 1.00 | 53.02 | C0  |
| ANISOU 530 CD LYS A 34   | 6890    | 6450    | 6800   | 1190 | 840   | 770 |
| ATOM 531 CE LYS A 34     | -25.109 | -28.552 | 22.434 | 1.00 | 55.87 | C0  |
| ANISOU 531 CE LYS A 34   | 7190    | 6850    | 7190   | 1420 | 870   | 850 |
| ATOM 532 NZ LYS A 34     | -25.206 | -29.923 | 21.877 | 1.00 | 57.73 | N0  |
| ANISOU 532 NZ LYS A 34   | 7600    | 6850    | 7480   | 1530 | 970   | 880 |
| ATOM 533 H LYS A 34      | -29.868 | -24.254 | 22.483 | 1.00 | 44.61 | H0  |
| ANISOU 533 H LYS A 34    | 5830    | 5520    | 5600   | 580  | 690   | 540 |
| ATOM 534 HA LYS A 34     | -28.533 | -26.294 | 23.840 | 1.00 | 47.03 | H0  |
| ANISOU 534 HA LYS A 34   | 6150    | 5800    | 5920   | 880  | 700   | 760 |
| ATOM 535 HB2 LYS A 34    | -27.936 | -25.851 | 21.471 | 1.00 | 47.70 | H0  |
| ANISOU 535 HB2 LYS A 34  | 6220    | 5820    | 6090   | 850  | 800   | 590 |
| ATOM 536 HB3 LYS A 34    | -27.217 | -24.556 | 22.026 | 1.00 | 47.31 | H0  |
| ANISOU 536 HB3 LYS A 34  | 5990    | 5990    | 6000   | 810  | 720   | 570 |

|        |     |     |     |   |    |         |         |        |      |       |     |    |
|--------|-----|-----|-----|---|----|---------|---------|--------|------|-------|-----|----|
| ATOM   | 537 | HG2 | LYS | A | 34 | -25.497 | -25.935 | 21.983 | 1.00 | 51.02 | H0  |    |
| ANISOU | 537 | HG2 | LYS | A | 34 | 6390    | 6470    | 6520   | 1100 | 780   | 660 | H0 |
| ATOM   | 538 | HG3 | LYS | A | 34 | -25.981 | -26.172 | 23.473 | 1.00 | 51.30 | H0  |    |
| ANISOU | 538 | HG3 | LYS | A | 34 | 6440    | 6550    | 6500   | 1110 | 700   | 770 | H0 |
| ATOM   | 539 | HD2 | LYS | A | 34 | -27.081 | -28.141 | 22.835 | 1.00 | 53.03 | H0  |    |
| ANISOU | 539 | HD2 | LYS | A | 34 | 6980    | 6390    | 6780   | 1170 | 830   | 820 | H0 |
| ATOM   | 540 | HD3 | LYS | A | 34 | -26.699 | -27.887 | 21.317 | 1.00 | 52.63 | H0  |    |
| ANISOU | 540 | HD3 | LYS | A | 34 | 6910    | 6300    | 6780   | 1140 | 900   | 700 | H0 |
| ATOM   | 541 | HE2 | LYS | A | 34 | -24.374 | -28.083 | 21.996 | 1.00 | 55.84 | H0  |    |
| ANISOU | 541 | HE2 | LYS | A | 34 | 7070    | 6950    | 7200   | 1440 | 870   | 800 | H0 |
| ATOM   | 542 | HE3 | LYS | A | 34 | -24.904 | -28.611 | 23.386 | 1.00 | 56.38 | H0  |    |
| ANISOU | 542 | HE3 | LYS | A | 34 | 7200    | 7010    | 7210   | 1480 | 810   | 930 | H0 |
| ATOM   | 543 | HZ1 | LYS | A | 34 | -25.893 | -30.366 | 22.269 | 1.00 | 57.56 | H0  |    |
| ANISOU | 543 | HZ1 | LYS | A | 34 | 7690    | 6730    | 7450   | 1510 | 980   | 930 | H0 |
| ATOM   | 544 | HZ2 | LYS | A | 34 | -24.434 | -30.373 | 22.033 | 1.00 | 58.75 | H0  |    |
| ANISOU | 544 | HZ2 | LYS | A | 34 | 7690    | 7010    | 7630   | 1690 | 990   | 940 | H0 |
| ATOM   | 545 | HZ3 | LYS | A | 34 | -25.350 | -29.882 | 20.983 | 1.00 | 57.08 | H0  |    |
| ANISOU | 545 | HZ3 | LYS | A | 34 | 7550    | 6700    | 7430   | 1480 | 1030  | 800 | H0 |
| ATOM   | 546 | N   | PHE | A | 35 | -28.121 | -24.743 | 25.733 | 1.00 | 44.12 | N0  |    |
| ANISOU | 546 | N   | PHE | A | 35 | 5550    | 5780    | 5430   | 830  | 540   | 790 | N0 |
| ATOM   | 547 | CA  | PHE | A | 35 | -27.955 | -23.796 | 26.865 | 1.00 | 43.46 | C0  |    |
| ANISOU | 547 | CA  | PHE | A | 35 | 5350    | 5890    | 5270   | 770  | 450   | 790 | C0 |
| ATOM   | 548 | C   | PHE | A | 35 | -26.477 | -23.419 | 26.975 | 1.00 | 43.20 | C0  |    |
| ANISOU | 548 | C   | PHE | A | 35 | 5140    | 6050    | 5230   | 860  | 420   | 790 | C0 |
| ATOM   | 549 | O   | PHE | A | 35 | -25.618 | -24.318 | 27.030 | 1.00 | 44.90 | O0  |    |
| ANISOU | 549 | O   | PHE | A | 35 | 5320    | 6280    | 5460   | 1030 | 430   | 870 | O0 |
| ATOM   | 550 | CB  | PHE | A | 35 | -28.572 | -24.372 | 28.141 | 1.00 | 43.62 | C0  |    |
| ANISOU | 550 | CB  | PHE | A | 35 | 5430    | 5910    | 5230   | 800  | 420   | 900 | C0 |
| ATOM   | 551 | CG  | PHE | A | 35 | -30.073 | -24.486 | 28.055 | 1.00 | 42.73 | C0  |    |
| ANISOU | 551 | CG  | PHE | A | 35 | 5470    | 5660    | 5110   | 670  | 450   | 880 | C0 |
| ATOM   | 552 | CD1 | PHE | A | 35 | -30.875 | -23.364 | 28.188 | 1.00 | 41.76 | C0  |    |
| ANISOU | 552 | CD1 | PHE | A | 35 | 5320    | 5590    | 4960   | 520  | 420   | 790 | C0 |
| ATOM   | 553 | CD2 | PHE | A | 35 | -30.683 | -25.703 | 27.799 | 1.00 | 43.53 | C0  |    |
| ANISOU | 553 | CD2 | PHE | A | 35 | 5720    | 5570    | 5250   | 700  | 510   | 930 | C0 |
| ATOM   | 554 | CE1 | PHE | A | 35 | -32.254 | -23.458 | 28.081 | 1.00 | 40.89 | C0  |    |
| ANISOU | 554 | CE1 | PHE | A | 35 | 5320    | 5370    | 4840   | 410  | 440   | 760 | C0 |
| ATOM   | 555 | CE2 | PHE | A | 35 | -32.063 | -25.799 | 27.708 | 1.00 | 42.67 | C0  |    |
| ANISOU | 555 | CE2 | PHE | A | 35 | 5730    | 5350    | 5130   | 570  | 540   | 900 | C0 |
| ATOM   | 556 | CZ  | PHE | A | 35 | -32.845 | -24.677 | 27.843 | 1.00 | 41.40 | C0  |    |
| ANISOU | 556 | CZ  | PHE | A | 35 | 5520    | 5270    | 4940   | 430  | 500   | 810 | C0 |
| ATOM   | 557 | H   | PHE | A | 35 | -28.215 | -25.608 | 26.003 | 1.00 | 45.01 | H0  |    |
| ANISOU | 557 | H   | PHE | A | 35 | 5740    | 5810    | 5550   | 900  | 560   | 860 | H0 |
| ATOM   | 558 | HA  | PHE | A | 35 | -28.456 | -22.971 | 26.639 | 1.00 | 42.20 | H0  |    |
| ANISOU | 558 | HA  | PHE | A | 35 | 5190    | 5740    | 5100   | 660  | 450   | 720 | H0 |
| ATOM   | 559 | HB2 | PHE | A | 35 | -28.189 | -25.258 | 28.306 | 1.00 | 44.83 | H0  |    |
| ANISOU | 559 | HB2 | PHE | A | 35 | 5620    | 6030    | 5390   | 920  | 430   | 980 | H0 |
| ATOM   | 560 | HB3 | PHE | A | 35 | -28.336 | -23.793 | 28.895 | 1.00 | 43.84 | H0  |    |
| ANISOU | 560 | HB3 | PHE | A | 35 | 5370    | 6090    | 5200   | 770  | 360   | 900 | H0 |
| ATOM   | 561 | HD1 | PHE | A | 35 | -30.476 | -22.524 | 28.347 | 1.00 | 41.41 | H0  |    |
| ANISOU | 561 | HD1 | PHE | A | 35 | 5180    | 5660    | 4890   | 490  | 380   | 750 | H0 |
| ATOM   | 562 | HD2 | PHE | A | 35 | -30.152 | -26.479 | 27.703 | 1.00 | 44.41 | H0  |    |
| ANISOU | 562 | HD2 | PHE | A | 35 | 5870    | 5620    | 5380   | 820  | 540   | 990 | H0 |
| ATOM   | 563 | HE1 | PHE | A | 35 | -32.788 | -22.687 | 28.184 | 1.00 | 40.14 | H0  |    |
| ANISOU | 563 | HE1 | PHE | A | 35 | 5200    | 5320    | 4730   | 320  | 430   | 710 | H0 |

|        |     |               |         |         |        |      |       |     |
|--------|-----|---------------|---------|---------|--------|------|-------|-----|
| ATOM   | 564 | HE2 PHE A 35  | -32.466 | -26.636 | 27.540 | 1.00 | 43.14 | H0  |
| ANISOU | 564 | HE2 PHE A 35  | 5900    | 5280    | 5210   | 580  | 590   | 930 |
| ATOM   | 565 | HZ PHE A 35   | -33.784 | -24.744 | 27.780 | 1.00 | 40.98 | H0  |
| ANISOU | 565 | HZ PHE A 35   | 5530    | 5160    | 4880   | 350  | 520   | 790 |
| ATOM   | 566 | N ILE A 36    | -26.210 | -22.114 | 26.949 | 1.00 | 41.66 | N0  |
| ANISOU | 566 | N ILE A 36    | 4830    | 5990    | 5010   | 740  | 390   | 690 |
| ATOM   | 567 | CA ILE A 36   | -24.850 | -21.511 | 27.040 | 1.00 | 42.43 | C0  |
| ANISOU | 567 | CA ILE A 36   | 4740    | 6300    | 5090   | 760  | 360   | 660 |
| ATOM   | 568 | C ILE A 36    | -24.643 | -20.953 | 28.451 | 1.00 | 42.58 | C0  |
| ANISOU | 568 | C ILE A 36    | 4640    | 6530    | 5000   | 730  | 270   | 680 |
| ATOM   | 569 | O ILE A 36    | -23.512 | -21.069 | 28.962 | 1.00 | 44.70 | O0  |
| ANISOU | 569 | O ILE A 36    | 4760    | 6990    | 5230   | 820  | 220   | 710 |
| ATOM   | 570 | CB ILE A 36   | -24.661 | -20.426 | 25.961 | 1.00 | 41.50 | C0  |
| ANISOU | 570 | CB ILE A 36   | 4590    | 6180    | 5000   | 630  | 410   | 520 |
| ATOM   | 571 | CG1 ILE A 36  | -25.045 | -20.935 | 24.568 | 1.00 | 41.00 | C0  |
| ANISOU | 571 | CG1 ILE A 36  | 4650    | 5910    | 5020   | 650  | 500   | 500 |
| ATOM   | 572 | CG2 ILE A 36  | -23.244 | -19.879 | 25.989 | 1.00 | 42.64 | C0  |
| ANISOU | 572 | CG2 ILE A 36  | 4530    | 6540    | 5130   | 640  | 400   | 470 |
| ATOM   | 573 | CD1 ILE A 36  | -24.352 | -22.214 | 24.166 | 1.00 | 42.45 | C0  |
| ANISOU | 573 | CD1 ILE A 36  | 4840    | 6040    | 5260   | 830  | 540   | 560 |
| ATOM   | 574 | H ILE A 36    | -26.866 | -21.489 | 26.856 | 1.00 | 40.87 | H0  |
| ANISOU | 574 | H ILE A 36    | 4770    | 5860    | 4900   | 630  | 390   | 640 |
| ATOM   | 575 | HA ILE A 36   | -24.190 | -22.211 | 26.889 | 1.00 | 43.37 | H0  |
| ANISOU | 575 | HA ILE A 36   | 4820    | 6430    | 5230   | 890  | 380   | 700 |
| ATOM   | 576 | HB ILE A 36   | -25.272 | -19.680 | 26.181 | 1.00 | 40.70 | H0  |
| ANISOU | 576 | HB ILE A 36   | 4520    | 6070    | 4870   | 520  | 400   | 480 |
| ATOM   | 577 | HG12 ILE A 36 | -26.014 | -21.081 | 24.542 | 1.00 | 40.26 | H0  |
| ANISOU | 577 | HG12 ILE A 36 | 4670    | 5700    | 4930   | 610  | 500   | 500 |
| ATOM   | 578 | HG13 ILE A 36 | -24.829 | -20.241 | 23.909 | 1.00 | 40.62 | H0  |
| ANISOU | 578 | HG13 ILE A 36 | 4580    | 5870    | 4990   | 580  | 530   | 420 |
| ATOM   | 579 | HG21 ILE A 36 | -23.124 | -19.319 | 26.775 | 1.00 | 42.85 | H0  |
| ANISOU | 579 | HG21 ILE A 36 | 4490    | 6690    | 5100   | 580  | 350   | 460 |
| ATOM   | 580 | HG22 ILE A 36 | -23.082 | -19.350 | 25.189 | 1.00 | 42.22 | H0  |
| ANISOU | 580 | HG22 ILE A 36 | 4480    | 6460    | 5110   | 570  | 450   | 400 |
| ATOM   | 581 | HG23 ILE A 36 | -22.611 | -20.617 | 26.020 | 1.00 | 43.71 | H0  |
| ANISOU | 581 | HG23 ILE A 36 | 4620    | 6710    | 5280   | 770  | 400   | 530 |
| ATOM   | 582 | HD11 ILE A 36 | -23.388 | -22.097 | 24.228 | 1.00 | 43.25 | H0  |
| ANISOU | 582 | HD11 ILE A 36 | 4810    | 6270    | 5350   | 890  | 530   | 560 |
| ATOM   | 583 | HD12 ILE A 36 | -24.591 | -22.439 | 23.251 | 1.00 | 41.99 | H0  |
| ANISOU | 583 | HD12 ILE A 36 | 4860    | 5850    | 5240   | 830  | 600   | 530 |
| ATOM   | 584 | HD13 ILE A 36 | -24.628 | -22.936 | 24.755 | 1.00 | 42.82 | H0  |
| ANISOU | 584 | HD13 ILE A 36 | 4930    | 6050    | 5290   | 910  | 520   | 640 |
| ATOM   | 585 | N ASN A 37    | -25.676 | -20.357 | 29.052 | 1.00 | 40.90 | N0  |
| ANISOU | 585 | N ASN A 37    | 4500    | 6300    | 4740   | 600  | 240   | 650 |
| ATOM   | 586 | CA ASN A 37   | -25.548 | -19.718 | 30.386 | 1.00 | 41.76 | C0  |
| ANISOU | 586 | CA ASN A 37   | 4520    | 6600    | 4750   | 540  | 160   | 660 |
| ATOM   | 587 | C ASN A 37    | -26.904 | -19.657 | 31.103 | 1.00 | 41.16 | C0  |
| ANISOU | 587 | C ASN A 37    | 4570    | 6450    | 4630   | 460  | 150   | 680 |
| ATOM   | 588 | O ASN A 37    | -27.956 | -19.617 | 30.432 | 1.00 | 39.64 | O0  |
| ANISOU | 588 | O ASN A 37    | 4500    | 6070    | 4490   | 400  | 200   | 640 |
| ATOM   | 589 | CB ASN A 37   | -24.907 | -18.331 | 30.279 | 1.00 | 41.38 | C0  |
| ANISOU | 589 | CB ASN A 37   | 4340    | 6710    | 4680   | 400  | 160   | 520 |
| ATOM   | 590 | CG ASN A 37   | -23.905 | -18.058 | 31.381 | 1.00 | 42.63 | C0  |
| ANISOU | 590 | CG ASN A 37   | 4320    | 7140    | 4740   | 410  | 80    | 530 |

|        |     |               |         |         |        |      |       |      |    |
|--------|-----|---------------|---------|---------|--------|------|-------|------|----|
| ATOM   | 591 | OD1 ASN A 37  | -24.116 | -18.449 | 32.530 | 1.00 | 42.35 | O0   |    |
| ANISOU | 591 | OD1 ASN A 37  | 4280    | 7200    | 4620   | 450  | 10    | 610  | O0 |
| ATOM   | 592 | ND2 ASN A 37  | -22.812 | -17.393 | 31.037 | 1.00 | 42.94 | N0   |    |
| ANISOU | 592 | ND2 ASN A 37  | 4200    | 7340    | 4780   | 350  | 90    | 440  | N0 |
| ATOM   | 593 | H ASN A 37    | -26.505 | -20.295 | 28.682 | 1.00 | 40.20 | H0   |    |
| ANISOU | 593 | H ASN A 37    | 4520    | 6080    | 4680   | 540  | 270   | 630  | H0 |
| ATOM   | 594 | HA ASN A 37   | -24.944 | -20.279 | 30.927 | 1.00 | 42.88 | H0   |    |
| ANISOU | 594 | HA ASN A 37   | 4590    | 6850    | 4860   | 640  | 120   | 730  | H0 |
| ATOM   | 595 | HB2 ASN A 37  | -24.457 | -18.255 | 29.413 | 1.00 | 41.31 | H0   |    |
| ANISOU | 595 | HB2 ASN A 37  | 4310    | 6660    | 4720   | 400  | 200   | 480  | H0 |
| ATOM   | 596 | HB3 ASN A 37  | -25.612 | -17.652 | 30.314 | 1.00 | 40.47 | H0   |    |
| ANISOU | 596 | HB3 ASN A 37  | 4290    | 6540    | 4550   | 280  | 170   | 470  | H0 |
| ATOM   | 597 | HD21 ASN A 37 | -22.044 | -17.565 | 31.440 | 1.00 | 44.24 | H0   |    |
| ANISOU | 597 | HD21 ASN A 37 | 4250    | 7660    | 4900   | 410  | 40    | 460  | H0 |
| ATOM   | 598 | HD22 ASN A 37 | -22.850 | -16.776 | 30.404 | 1.00 | 42.43 | H0   |    |
| ANISOU | 598 | HD22 ASN A 37 | 4160    | 7220    | 4750   | 260  | 130   | 360  | H0 |
| ATOM   | 599 | N ILE A 38    | -26.845 | -19.686 | 32.434 | 1.00 | 42.80 | N0   |    |
| ANISOU | 599 | N ILE A 38    | 4720    | 6800    | 4740   | 470  | 80    | 740  | N0 |
| ATOM   | 600 | CA ILE A 38   | -27.951 | -19.326 | 33.369 | 1.00 | 43.04 | C0   |    |
| ANISOU | 600 | CA ILE A 38   | 4830    | 6830    | 4690   | 370  | 60    | 730  | C0 |
| ATOM   | 601 | C ILE A 38    | -27.417 | -18.197 | 34.251 | 1.00 | 43.97 | C0   |    |
| ANISOU | 601 | C ILE A 38    | 4810    | 7180    | 4720   | 270  | 0     | 660  | C0 |
| ATOM   | 602 | O ILE A 38    | -26.469 | -18.451 | 35.007 | 1.00 | 45.41 | O0   |    |
| ANISOU | 602 | O ILE A 38    | 4870    | 7560    | 4820   | 340  | -70   | 710  | O0 |
| ATOM   | 603 | CB ILE A 38   | -28.416 | -20.556 | 34.176 | 1.00 | 43.73 | C0   |    |
| ANISOU | 603 | CB ILE A 38   | 5000    | 6870    | 4740   | 480  | 40    | 880  | C0 |
| ATOM   | 604 | CG1 ILE A 38  | -28.811 | -21.713 | 33.252 | 1.00 | 43.47 | C0   |    |
| ANISOU | 604 | CG1 ILE A 38  | 5110    | 6610    | 4800   | 570  | 110   | 950  | C0 |
| ATOM   | 605 | CG2 ILE A 38  | -29.546 | -20.182 | 35.125 | 1.00 | 43.04 | C0   |    |
| ANISOU | 605 | CG2 ILE A 38  | 4980    | 6800    | 4570   | 360  | 20    | 880  | C0 |
| ATOM   | 606 | CD1 ILE A 38  | -28.995 | -23.037 | 33.958 | 1.00 | 44.81 | C0   |    |
| ANISOU | 606 | CD1 ILE A 38  | 5370    | 6720    | 4930   | 700  | 110   | 1110 | C0 |
| ATOM   | 607 | H ILE A 38    | -26.089 | -19.944 | 32.874 | 1.00 | 43.90 | H0   |    |
| ANISOU | 607 | H ILE A 38    | 4770    | 7070    | 4840   | 550  | 40    | 780  | H0 |
| ATOM   | 608 | HA ILE A 38   | -28.703 | -18.992 | 32.849 | 1.00 | 41.86 | H0   |    |
| ANISOU | 608 | HA ILE A 38   | 4750    | 6560    | 4590   | 290  | 100   | 680  | H0 |
| ATOM   | 609 | HB ILE A 38   | -27.651 | -20.860 | 34.724 | 1.00 | 44.91 | H0   |    |
| ANISOU | 609 | HB ILE A 38   | 5070    | 7150    | 4840   | 560  | -10   | 950  | H0 |
| ATOM   | 610 | HG12 ILE A 38 | -29.649 | -21.481 | 32.800 | 1.00 | 42.45 | H0   |    |
| ANISOU | 610 | HG12 ILE A 38 | 5060    | 6360    | 4710   | 480  | 150   | 900  | H0 |
| ATOM   | 611 | HG13 ILE A 38 | -28.121 | -21.818 | 32.566 | 1.00 | 43.71 | H0   |    |
| ANISOU | 611 | HG13 ILE A 38 | 5090    | 6630    | 4890   | 630  | 130   | 930  | H0 |
| ATOM   | 612 | HG21 ILE A 38 | -29.223 | -19.542 | 35.783 | 1.00 | 43.48 | H0   |    |
| ANISOU | 612 | HG21 ILE A 38 | 4960    | 7010    | 4560   | 320  | -20   | 840  | H0 |
| ATOM   | 613 | HG22 ILE A 38 | -29.866 | -20.978 | 35.582 | 1.00 | 43.65 | H0   |    |
| ANISOU | 613 | HG22 ILE A 38 | 5130    | 6830    | 4620   | 420  | 20    | 970  | H0 |
| ATOM   | 614 | HG23 ILE A 38 | -30.277 | -19.784 | 34.621 | 1.00 | 42.01 | H0   |    |
| ANISOU | 614 | HG23 ILE A 38 | 4910    | 6560    | 4490   | 280  | 60    | 810  | H0 |
| ATOM   | 615 | HD11 ILE A 38 | -28.239 | -23.198 | 34.550 | 1.00 | 45.91 | H0   |    |
| ANISOU | 615 | HD11 ILE A 38 | 5430    | 6990    | 5020   | 780  | 60    | 1170 | H0 |
| ATOM   | 616 | HD12 ILE A 38 | -29.047 | -23.752 | 33.300 | 1.00 | 44.83 | H0   |    |
| ANISOU | 616 | HD12 ILE A 38 | 5450    | 6580    | 5000   | 760  | 160   | 1140 | H0 |
| ATOM   | 617 | HD13 ILE A 38 | -29.816 | -23.018 | 34.479 | 1.00 | 44.47 | H0   |    |
| ANISOU | 617 | HD13 ILE A 38 | 5400    | 6650    | 4850   | 630  | 110   | 1120 | H0 |

|                          |         |         |        |      |       |     |    |
|--------------------------|---------|---------|--------|------|-------|-----|----|
| ATOM 618 N LEU A 39      | -27.976 | -16.992 | 34.116 | 1.00 | 44.64 | N0  |    |
| ANISOU 618 N LEU A 39    | 4920    | 7240    | 4800   | 110  | 20    | 530 | N0 |
| ATOM 619 CA LEU A 39     | -27.364 | -15.729 | 34.616 | 1.00 | 46.97 | C0  |    |
| ANISOU 619 CA LEU A 39   | 5100    | 7720    | 5030   | -20  | 0     | 420 | C0 |
| ATOM 620 C LEU A 39      | -28.020 | -15.292 | 35.929 | 1.00 | 49.27 | C0  |    |
| ANISOU 620 C LEU A 39    | 5410    | 8100    | 5210   | -110 | -40   | 400 | C0 |
| ATOM 621 O LEU A 39      | -27.280 | -14.944 | 36.873 | 1.00 | 51.79 | O0  |    |
| ANISOU 621 O LEU A 39    | 5600    | 8650    | 5420   | -140 | -100  | 380 | O0 |
| ATOM 622 CB LEU A 39     | -27.513 | -14.652 | 33.540 | 1.00 | 45.48 | C0  |    |
| ANISOU 622 CB LEU A 39   | 4950    | 7420    | 4910   | -140 | 70    | 280 | C0 |
| ATOM 623 CG LEU A 39     | -26.808 | -14.959 | 32.221 | 1.00 | 45.63 | C0  |    |
| ANISOU 623 CG LEU A 39   | 4950    | 7360    | 5030   | -80  | 120   | 280 | C0 |
| ATOM 624 CD1 LEU A 39    | -27.099 | -13.883 | 31.190 | 1.00 | 44.63 | C0  |    |
| ANISOU 624 CD1 LEU A 39  | 4890    | 7110    | 4960   | -200 | 200   | 160 | C0 |
| ATOM 625 CD2 LEU A 39    | -25.311 | -15.107 | 32.437 | 1.00 | 47.04 | C0  |    |
| ANISOU 625 CD2 LEU A 39  | 4940    | 7750    | 5180   | -30  | 80    | 280 | C0 |
| ATOM 626 H LEU A 39      | -28.778 | -16.871 | 33.702 | 1.00 | 43.70 | H0  |    |
| ANISOU 626 H LEU A 39    | 4890    | 6990    | 4720   | 70   | 60    | 510 | H0 |
| ATOM 627 HA LEU A 39     | -26.408 | -15.892 | 34.785 | 1.00 | 47.93 | H0  |    |
| ANISOU 627 HA LEU A 39   | 5110    | 7980    | 5120   | 20   | -40   | 430 | H0 |
| ATOM 628 HB2 LEU A 39    | -28.466 | -14.522 | 33.361 | 1.00 | 44.71 | H0  |    |
| ANISOU 628 HB2 LEU A 39  | 4960    | 7190    | 4840   | -170 | 100   | 270 | H0 |
| ATOM 629 HB3 LEU A 39    | -27.161 | -13.811 | 33.893 | 1.00 | 46.02 | H0  |    |
| ANISOU 629 HB3 LEU A 39  | 4960    | 7590    | 4940   | -240 | 70    | 200 | H0 |
| ATOM 630 HG LEU A 39     | -27.157 | -15.818 | 31.877 | 1.00 | 45.26 | H0  |    |
| ANISOU 630 HG LEU A 39   | 4960    | 7210    | 5030   | 10   | 130   | 350 | H0 |
| ATOM 631 HD11 LEU A 39   | -28.061 | -13.785 | 31.085 | 1.00 | 43.76 | H0  |    |
| ANISOU 631 HD11 LEU A 39 | 4880    | 6880    | 4860   | -210 | 220   | 160 | H0 |
| ATOM 632 HD12 LEU A 39   | -26.704 | -14.135 | 30.338 | 1.00 | 44.53 | H0  |    |
| ANISOU 632 HD12 LEU A 39 | 4870    | 7040    | 5010   | -150 | 230   | 170 | H0 |
| ATOM 633 HD13 LEU A 39   | -26.717 | -13.039 | 31.487 | 1.00 | 45.00 | H0  |    |
| ANISOU 633 HD13 LEU A 39 | 4880    | 7240    | 4970   | -290 | 200   | 90  | H0 |
| ATOM 634 HD21 LEU A 39   | -24.981 | -14.353 | 32.955 | 1.00 | 47.56 | H0  |    |
| ANISOU 634 HD21 LEU A 39 | 4940    | 7950    | 5190   | -130 | 60    | 210 | H0 |
| ATOM 635 HD22 LEU A 39   | -24.860 | -15.130 | 31.576 | 1.00 | 46.99 | H0  |    |
| ANISOU 635 HD22 LEU A 39 | 4920    | 7700    | 5230   | -20  | 120   | 260 | H0 |
| ATOM 636 HD23 LEU A 39   | -25.130 | -15.934 | 32.917 | 1.00 | 47.75 | H0  |    |
| ANISOU 636 HD23 LEU A 39 | 5000    | 7900    | 5240   | 80   | 30    | 380 | H0 |
| ATOM 637 N GLU A 40      | -29.351 | -15.296 | 35.983 | 1.00 | 50.01 | N0  |    |
| ANISOU 637 N GLU A 40    | 5640    | 8050    | 5310   | -140 | -10   | 410 | N0 |
| ATOM 638 CA GLU A 40     | -30.115 | -14.847 | 37.172 | 1.00 | 51.94 | C0  |    |
| ANISOU 638 CA GLU A 40   | 5910    | 8370    | 5460   | -220 | -30   | 390 | C0 |
| ATOM 639 C GLU A 40      | -31.271 | -15.820 | 37.406 | 1.00 | 50.61 | C0  |    |
| ANISOU 639 C GLU A 40    | 5860    | 8070    | 5290   | -160 | -10   | 490 | C0 |
| ATOM 640 O GLU A 40      | -32.017 | -16.119 | 36.443 | 1.00 | 51.12 | O0  |    |
| ANISOU 640 O GLU A 40    | 6020    | 7940    | 5450   | -150 | 40    | 500 | O0 |
| ATOM 641 CB GLU A 40     | -30.602 | -13.409 | 36.995 | 1.00 | 53.94 | C0  |    |
| ANISOU 641 CB GLU A 40   | 6200    | 8580    | 5720   | -370 | 20    | 230 | C0 |
| ATOM 642 CG GLU A 40     | -31.300 | -12.860 | 38.227 | 1.00 | 57.11 | C0  |    |
| ANISOU 642 CG GLU A 40   | 6620    | 9070    | 6010   | -460 | 10    | 190 | C0 |
| ATOM 643 CD GLU A 40     | -31.326 | -11.343 | 38.320 | 1.00 | 59.80 | C0  |    |
| ANISOU 643 CD GLU A 40   | 6970    | 9430    | 6330   | -610 | 50    | 30  | C0 |
| ATOM 644 OE1 GLU A 40    | -32.420 | -10.783 | 38.576 | 1.00 | 61.15 | O0  |    |
| ANISOU 644 OE1 GLU A 40  | 7230    | 9520    | 6490   | -660 | 90    | -20 | O0 |

|        |     |      |     |   |    |         |         |        |      |       |      |    |
|--------|-----|------|-----|---|----|---------|---------|--------|------|-------|------|----|
| ATOM   | 645 | OE2  | GLU | A | 40 | -30.249 | -10.723 | 38.145 | 1.00 | 63.18 | O0   |    |
| ANISOU | 645 | OE2  | GLU | A | 40 | 7310    | 9950    | 6750   | -670 | 50    | -50  | O0 |
| ATOM   | 646 | H    | GLU | A | 40 | -29.872 | -15.578 | 35.292 | 1.00 | 49.15 | H0   |    |
| ANISOU | 646 | H    | GLU | A | 40 | 5610    | 7790    | 5280   | -120 | 30    | 420  | H0 |
| ATOM   | 647 | HA   | GLU | A | 40 | -29.517 | -14.880 | 37.953 | 1.00 | 52.95 | H0   |    |
| ANISOU | 647 | HA   | GLU | A | 40 | 5960    | 8660    | 5500   | -220 | -80   | 410  | H0 |
| ATOM   | 648 | HB2  | GLU | A | 40 | -29.832 | -12.842 | 36.781 | 1.00 | 54.29 | H0   |    |
| ANISOU | 648 | HB2  | GLU | A | 40 | 6180    | 8690    | 5760   | -420 | 20    | 170  | H0 |
| ATOM   | 649 | HB3  | GLU | A | 40 | -31.221 | -13.378 | 36.236 | 1.00 | 52.95 | H0   |    |
| ANISOU | 649 | HB3  | GLU | A | 40 | 6150    | 8300    | 5660   | -370 | 70    | 220  | H0 |
| ATOM   | 650 | HG2  | GLU | A | 40 | -32.225 | -13.186 | 38.239 | 1.00 | 56.45 | H0   |    |
| ANISOU | 650 | HG2  | GLU | A | 40 | 6620    | 8890    | 5940   | -440 | 30    | 230  | H0 |
| ATOM   | 651 | HG3  | GLU | A | 40 | -30.854 | -13.211 | 39.028 | 1.00 | 57.97 | H0   |    |
| ANISOU | 651 | HG3  | GLU | A | 40 | 6670    | 9320    | 6040   | -440 | -40   | 240  | H0 |
| ATOM   | 652 | N    | VAL | A | 41 | -31.379 | -16.304 | 38.640 | 1.00 | 49.22 | N0   |    |
| ANISOU | 652 | N    | VAL | A | 41 | 5680    | 8010    | 5010   | -140 | -60   | 570  | N0 |
| ATOM   | 653 | CA   | VAL | A | 41 | -32.435 | -17.240 | 39.109 | 1.00 | 48.97 | C0   |    |
| ANISOU | 653 | CA   | VAL | A | 41 | 5760    | 7890    | 4950   | -100 | -50   | 680  | C0 |
| ATOM   | 654 | C    | VAL | A | 41 | -33.101 | -16.583 | 40.319 | 1.00 | 48.37 | C0   |    |
| ANISOU | 654 | C    | VAL | A | 41 | 5690    | 7930    | 4760   | -210 | -60   | 630  | C0 |
| ATOM   | 655 | O    | VAL | A | 41 | -32.409 | -15.852 | 41.047 | 1.00 | 49.42 | O0   |    |
| ANISOU | 655 | O    | VAL | A | 41 | 5730    | 8250    | 4800   | -260 | -100  | 570  | O0 |
| ATOM   | 656 | CB   | VAL | A | 41 | -31.822 | -18.618 | 39.427 | 1.00 | 50.42 | C0   |    |
| ANISOU | 656 | CB   | VAL | A | 41 | 5950    | 8100    | 5110   | 50   | -80   | 850  | C0 |
| ATOM   | 657 | CG1  | VAL | A | 41 | -32.779 | -19.544 | 40.152 | 1.00 | 50.62 | C0   |    |
| ANISOU | 657 | CG1  | VAL | A | 41 | 6100    | 8060    | 5080   | 70   | -60   | 960  | C0 |
| ATOM   | 658 | CG2  | VAL | A | 41 | -31.299 | -19.289 | 38.166 | 1.00 | 50.40 | C0   |    |
| ANISOU | 658 | CG2  | VAL | A | 41 | 5960    | 7960    | 5230   | 160  | -50   | 880  | C0 |
| ATOM   | 659 | H    | VAL | A | 41 | -30.788 | -16.085 | 39.297 | 1.00 | 50.60 | H0   |    |
| ANISOU | 659 | H    | VAL | A | 41 | 5780    | 8340    | 5110   | -150 | -110  | 570  | H0 |
| ATOM   | 660 | HA   | VAL | A | 41 | -33.098 | -17.345 | 38.404 | 1.00 | 47.97 | H0   |    |
| ANISOU | 660 | HA   | VAL | A | 41 | 5710    | 7620    | 4900   | -110 | 0     | 660  | H0 |
| ATOM   | 661 | HB   | VAL | A | 41 | -31.052 | -18.461 | 40.024 | 1.00 | 51.34 | H0   |    |
| ANISOU | 661 | HB   | VAL | A | 41 | 5980    | 8380    | 5150   | 70   | -140  | 860  | H0 |
| ATOM   | 662 | HG11 | VAL | A | 41 | -33.051 | -19.143 | 40.995 | 1.00 | 50.99 | H0   |    |
| ANISOU | 662 | HG11 | VAL | A | 41 | 6130    | 8210    | 5040   | 10   | -80   | 940  | H0 |
| ATOM   | 663 | HG12 | VAL | A | 41 | -32.339 | -20.393 | 40.325 | 1.00 | 51.58 | H0   |    |
| ANISOU | 663 | HG12 | VAL | A | 41 | 6230    | 8180    | 5190   | 180  | -80   | 1070 | H0 |
| ATOM   | 664 | HG13 | VAL | A | 41 | -33.562 | -19.693 | 39.595 | 1.00 | 49.79 | H0   |    |
| ANISOU | 664 | HG13 | VAL | A | 41 | 6070    | 7810    | 5040   | 40   | -10   | 940  | H0 |
| ATOM   | 665 | HG21 | VAL | A | 41 | -32.043 | -19.483 | 37.569 | 1.00 | 49.45 | H0   |    |
| ANISOU | 665 | HG21 | VAL | A | 41 | 5930    | 7680    | 5180   | 130  | 0     | 870  | H0 |
| ATOM   | 666 | HG22 | VAL | A | 41 | -30.849 | -20.118 | 38.402 | 1.00 | 51.25 | H0   |    |
| ANISOU | 666 | HG22 | VAL | A | 41 | 6070    | 8080    | 5320   | 260  | -70   | 990  | H0 |
| ATOM   | 667 | HG23 | VAL | A | 41 | -30.671 | -18.696 | 37.718 | 1.00 | 50.14 | H0   |    |
| ANISOU | 667 | HG23 | VAL | A | 41 | 5850    | 7970    | 5230   | 140  | -60   | 810  | H0 |
| ATOM   | 668 | N    | ASN | A | 42 | -34.406 | -16.790 | 40.485 | 1.00 | 47.15 | N0   |    |
| ANISOU | 668 | N    | ASN | A | 42 | 5640    | 7670    | 4600   | -250 | -10   | 640  | N0 |
| ATOM   | 669 | CA   | ASN | A | 42 | -35.192 | -16.253 | 41.625 | 1.00 | 46.83 | C0   |    |
| ANISOU | 669 | CA   | ASN | A | 42 | 5620    | 7720    | 4450   | -340 | 0     | 600  | C0 |
| ATOM   | 670 | C    | ASN | A | 42 | -36.261 | -17.286 | 41.983 | 1.00 | 46.37 | C0   |    |
| ANISOU | 670 | C    | ASN | A | 42 | 5660    | 7580    | 4380   | -330 | 30    | 700  | C0 |
| ATOM   | 671 | O    | ASN | A | 42 | -37.250 | -17.408 | 41.226 | 1.00 | 44.50 | O0   |    |
| ANISOU | 671 | O    | ASN | A | 42 | 5500    | 7190    | 4230   | -350 | 100   | 670  | O0 |

|        |     |      |     |   |    |         |         |        |      |       |      |    |
|--------|-----|------|-----|---|----|---------|---------|--------|------|-------|------|----|
| ATOM   | 672 | CB   | ASN | A | 42 | -35.766 | -14.872 | 41.302 | 1.00 | 45.95 | C0   |    |
| ANISOU | 672 | CB   | ASN | A | 42 | 5500    | 7580    | 4370   | -450 | 40    | 430  | C0 |
| ATOM   | 673 | CG   | ASN | A | 42 | -36.298 | -14.148 | 42.521 | 1.00 | 46.78 | C0   |    |
| ANISOU | 673 | CG   | ASN | A | 42 | 5610    | 7810    | 4360   | -550 | 40    | 360  | C0 |
| ATOM   | 674 | OD1  | ASN | A | 42 | -36.852 | -14.758 | 43.433 | 1.00 | 46.90 | O0   |    |
| ANISOU | 674 | OD1  | ASN | A | 42 | 5660    | 7880    | 4280   | -550 | 40    | 440  | O0 |
| ATOM   | 675 | ND2  | ASN | A | 42 | -36.140 | -12.837 | 42.539 | 1.00 | 47.06 | N0   |    |
| ANISOU | 675 | ND2  | ASN | A | 42 | 5610    | 7890    | 4380   | -640 | 60    | 220  | N0 |
| ATOM   | 676 | H    | ASN | A | 42 | -34.901 | -17.278 | 39.896 | 1.00 | 46.61 | H0   |    |
| ANISOU | 676 | H    | ASN | A | 42 | 5630    | 7470    | 4600   | -220 | 30    | 670  | H0 |
| ATOM   | 677 | HA   | ASN | A | 42 | -34.586 | -16.150 | 42.396 | 1.00 | 47.80 | H0   |    |
| ANISOU | 677 | HA   | ASN | A | 42 | 5680    | 8000    | 4480   | -340 | -50   | 620  | H0 |
| ATOM   | 678 | HB2  | ASN | A | 42 | -35.064 | -14.328 | 40.890 | 1.00 | 45.90 | H0   |    |
| ANISOU | 678 | HB2  | ASN | A | 42 | 5450    | 7600    | 4400   | -460 | 30    | 370  | H0 |
| ATOM   | 679 | HB3  | ASN | A | 42 | -36.488 | -14.975 | 40.651 | 1.00 | 45.16 | H0   |    |
| ANISOU | 679 | HB3  | ASN | A | 42 | 5460    | 7350    | 4350   | -450 | 90    | 420  | H0 |
| ATOM   | 680 | HD21 | ASN | A | 42 | -36.024 | -12.416 | 43.308 | 1.00 | 47.59 | H0   |    |
| ANISOU | 680 | HD21 | ASN | A | 42 | 5650    | 8070    | 4360   | -690 | 50    | 180  | H0 |
| ATOM   | 681 | HD22 | ASN | A | 42 | -36.152 | -12.379 | 41.783 | 1.00 | 46.27 | H0   |    |
| ANISOU | 681 | HD22 | ASN | A | 42 | 5520    | 7700    | 4360   | -640 | 90    | 160  | H0 |
| ATOM   | 682 | N    | GLU | A | 43 | -36.048 | -18.012 | 43.084 | 1.00 | 47.32 | N0   |    |
| ANISOU | 682 | N    | GLU | A | 43 | 5790    | 7810    | 4380   | -290 | 0     | 820  | N0 |
| ATOM   | 683 | CA   | GLU | A | 43 | -36.931 | -19.117 | 43.535 | 1.00 | 47.91 | C0   |    |
| ANISOU | 683 | CA   | GLU | A | 43 | 5980    | 7800    | 4420   | -270 | 40    | 940  | C0 |
| ATOM   | 684 | C    | GLU | A | 43 | -38.231 | -18.540 | 44.109 | 1.00 | 47.43 | C0   |    |
| ANISOU | 684 | C    | GLU | A | 43 | 5960    | 7760    | 4300   | -400 | 90    | 860  | C0 |
| ATOM   | 685 | O    | GLU | A | 43 | -39.244 | -19.267 | 44.097 | 1.00 | 47.51 | O0   |    |
| ANISOU | 685 | O    | GLU | A | 43 | 6060    | 7660    | 4330   | -430 | 150   | 910  | O0 |
| ATOM   | 686 | CB   | GLU | A | 43 | -36.197 | -20.008 | 44.539 | 1.00 | 49.73 | C0   |    |
| ANISOU | 686 | CB   | GLU | A | 43 | 6220    | 8150    | 4530   | -180 | -20   | 1110 | C0 |
| ATOM   | 687 | CG   | GLU | A | 43 | -37.026 | -21.193 | 45.006 | 1.00 | 50.69 | C0   |    |
| ANISOU | 687 | CG   | GLU | A | 43 | 6480    | 8170    | 4610   | -170 | 40    | 1240 | C0 |
| ATOM   | 688 | CD   | GLU | A | 43 | -36.259 | -22.301 | 45.706 | 1.00 | 52.29 | C0   |    |
| ANISOU | 688 | CD   | GLU | A | 43 | 6730    | 8420    | 4720   | -30  | 0     | 1440 | C0 |
| ATOM   | 689 | OE1  | GLU | A | 43 | -36.880 | -23.337 | 46.005 | 1.00 | 52.70 | O0   |    |
| ANISOU | 689 | OE1  | GLU | A | 43 | 6920    | 8360    | 4740   | -20  | 60    | 1560 | O0 |
| ATOM   | 690 | OE2  | GLU | A | 43 | -35.050 | -22.129 | 45.945 | 1.00 | 53.29 | O0   |    |
| ANISOU | 690 | OE2  | GLU | A | 43 | 6760    | 8700    | 4790   | 60   | -90   | 1470 | O0 |
| ATOM   | 691 | H    | GLU | A | 43 | -35.336 | -17.867 | 43.634 | 1.00 | 48.24 | H0   |    |
| ANISOU | 691 | H    | GLU | A | 43 | 5850    | 8060    | 4420   | -270 | -60   | 840  | H0 |
| ATOM   | 692 | HA   | GLU | A | 43 | -37.161 | -19.660 | 42.748 | 1.00 | 47.37 | H0   |    |
| ANISOU | 692 | HA   | GLU | A | 43 | 5970    | 7590    | 4440   | -240 | 70    | 970  | H0 |
| ATOM   | 693 | HB2  | GLU | A | 43 | -35.374 | -20.337 | 44.121 | 1.00 | 50.01 | H0   |    |
| ANISOU | 693 | HB2  | GLU | A | 43 | 6230    | 8170    | 4600   | -90  | -50   | 1150 | H0 |
| ATOM   | 694 | HB3  | GLU | A | 43 | -35.947 | -19.467 | 45.316 | 1.00 | 50.33 | H0   |    |
| ANISOU | 694 | HB3  | GLU | A | 43 | 6240    | 8380    | 4500   | -220 | -60   | 1080 | H0 |
| ATOM   | 695 | HG2  | GLU | A | 43 | -37.719 | -20.869 | 45.619 | 1.00 | 50.64 | H0   |    |
| ANISOU | 695 | HG2  | GLU | A | 43 | 6490    | 8210    | 4530   | -250 | 60    | 1210 | H0 |
| ATOM   | 696 | HG3  | GLU | A | 43 | -37.482 | -21.582 | 44.229 | 1.00 | 49.91 | H0   |    |
| ANISOU | 696 | HG3  | GLU | A | 43 | 6440    | 7910    | 4610   | -170 | 90    | 1240 | H0 |
| ATOM   | 697 | N    | ILE | A | 44 | -38.219 | -17.290 | 44.584 | 1.00 | 47.61 | N0   |    |
| ANISOU | 697 | N    | ILE | A | 44 | 5910    | 7910    | 4270   | -480 | 70    | 730  | N0 |
| ATOM   | 698 | CA   | ILE | A | 44 | -39.430 | -16.615 | 45.145 | 1.00 | 47.89 | C0   |    |
| ANISOU | 698 | CA   | ILE | A | 44 | 5970    | 7970    | 4260   | -590 | 130   | 630  | C0 |

|                          |         |         |        |      |       |     |    |
|--------------------------|---------|---------|--------|------|-------|-----|----|
| ATOM 699 C ILE A 44      | -40.375 | -16.252 | 43.989 | 1.00 | 45.68 | C0  |    |
| ANISOU 699 C ILE A 44    | 5710    | 7530    | 4110   | -610 | 200   | 540 | C0 |
| ATOM 700 O ILE A 44      | -41.557 | -16.628 | 44.071 | 1.00 | 45.73 | O0  |    |
| ANISOU 700 O ILE A 44    | 5770    | 7490    | 4120   | -660 | 260   | 550 | O0 |
| ATOM 701 CB ILE A 44     | -39.049 | -15.397 | 46.015 | 1.00 | 49.51 | C0  |    |
| ANISOU 701 CB ILE A 44   | 6100    | 8360    | 4350   | -660 | 100   | 520 | C0 |
| ATOM 702 CG1 ILE A 44    | -38.255 | -15.818 | 47.258 | 1.00 | 51.33 | C0  |    |
| ANISOU 702 CG1 ILE A 44  | 6300    | 8780    | 4420   | -640 | 30    | 610 | C0 |
| ATOM 703 CG2 ILE A 44    | -40.288 | -14.594 | 46.395 | 1.00 | 49.54 | C0  |    |
| ANISOU 703 CG2 ILE A 44  | 6130    | 8360    | 4330   | -760 | 170   | 400 | C0 |
| ATOM 704 CD1 ILE A 44    | -37.546 | -14.678 | 47.958 | 1.00 | 52.07 | C0  |    |
| ANISOU 704 CD1 ILE A 44  | 6310    | 9060    | 4410   | -720 | -20   | 500 | C0 |
| ATOM 705 H ILE A 44      | -37.469 | -16.774 | 44.604 | 1.00 | 47.79 | H0  |    |
| ANISOU 705 H ILE A 44    | 5870    | 8010    | 4280   | -480 | 30    | 690 | H0 |
| ATOM 706 HA ILE A 44     | -39.889 | -17.255 | 45.717 | 1.00 | 48.46 | H0  |    |
| ANISOU 706 HA ILE A 44   | 6090    | 8060    | 4270   | -600 | 150   | 710 | H0 |
| ATOM 707 HB ILE A 44     | -38.466 | -14.811 | 45.473 | 1.00 | 48.95 | H0  |    |
| ANISOU 707 HB ILE A 44   | 5980    | 8280    | 4340   | -660 | 80    | 450 | H0 |
| ATOM 708 HG12 ILE A 44   | -38.870 | -16.243 | 47.893 | 1.00 | 51.82 | H0  |    |
| ANISOU 708 HG12 ILE A 44 | 6410    | 8860    | 4410   | -660 | 50    | 670 | H0 |
| ATOM 709 HG13 ILE A 44   | -37.588 | -16.486 | 46.993 | 1.00 | 51.57 | H0  |    |
| ANISOU 709 HG13 ILE A 44 | 6330    | 8800    | 4470   | -560 | -10   | 710 | H0 |
| ATOM 710 HG21 ILE A 44   | -40.589 | -14.076 | 45.629 | 1.00 | 48.55 | H0  |    |
| ANISOU 710 HG21 ILE A 44 | 6000    | 8150    | 4300   | -760 | 200   | 320 | H0 |
| ATOM 711 HG22 ILE A 44   | -40.077 | -13.991 | 47.127 | 1.00 | 50.06 | H0  |    |
| ANISOU 711 HG22 ILE A 44 | 6160    | 8550    | 4310   | -810 | 160   | 340 | H0 |
| ATOM 712 HG23 ILE A 44   | -40.997 | -15.201 | 46.672 | 1.00 | 49.66 | H0  |    |
| ANISOU 712 HG23 ILE A 44 | 6190    | 8360    | 4320   | -770 | 200   | 460 | H0 |
| ATOM 713 HD11 ILE A 44   | -37.059 | -14.146 | 47.305 | 1.00 | 51.50 | H0  |    |
| ANISOU 713 HD11 ILE A 44 | 6190    | 8960    | 4420   | -720 | -20   | 420 | H0 |
| ATOM 714 HD12 ILE A 44   | -36.921 | -15.037 | 48.612 | 1.00 | 53.14 | H0  |    |
| ANISOU 714 HD12 ILE A 44 | 6410    | 9330    | 4450   | -690 | -70   | 570 | H0 |
| ATOM 715 HD13 ILE A 44   | -38.198 | -14.116 | 48.411 | 1.00 | 52.07 | H0  |    |
| ANISOU 715 HD13 ILE A 44 | 6320    | 9090    | 4370   | -790 | 20    | 420 | H0 |
| ATOM 716 N THR A 45      | -39.878 | -15.583 | 42.939 | 1.00 | 44.44 | N0  |    |
| ANISOU 716 N THR A 45    | 5520    | 7310    | 4060   | -590 | 190   | 460 | N0 |
| ATOM 717 CA THR A 45     | -40.693 | -15.121 | 41.775 | 1.00 | 42.72 | C0  |    |
| ANISOU 717 CA THR A 45   | 5320    | 6950    | 3960   | -600 | 240   | 370 | C0 |
| ATOM 718 C THR A 45      | -40.827 | -16.220 | 40.707 | 1.00 | 41.90 | C0  |    |
| ANISOU 718 C THR A 45    | 5260    | 6700    | 3960   | -540 | 260   | 450 | C0 |
| ATOM 719 O THR A 45      | -41.678 | -16.054 | 39.806 | 1.00 | 41.69 | O0  |    |
| ANISOU 719 O THR A 45    | 5250    | 6570    | 4010   | -550 | 300   | 390 | O0 |
| ATOM 720 CB THR A 45     | -40.124 | -13.843 | 41.142 | 1.00 | 41.94 | C0  |    |
| ANISOU 720 CB THR A 45   | 5180    | 6840    | 3910   | -600 | 240   | 250 | C0 |
| ATOM 721 OG1 THR A 45    | -38.869 | -14.148 | 40.530 | 1.00 | 41.74 | O0  |    |
| ANISOU 721 OG1 THR A 45  | 5120    | 6800    | 3940   | -550 | 190   | 290 | O0 |
| ATOM 722 CG2 THR A 45    | -39.959 | -12.715 | 42.138 | 1.00 | 42.57 | C0  |    |
| ANISOU 722 CG2 THR A 45  | 5230    | 7050    | 3900   | -680 | 240   | 150 | C0 |
| ATOM 723 H THR A 45      | -38.998 | -15.360 | 42.861 | 1.00 | 44.54 | H0  |    |
| ANISOU 723 H THR A 45    | 5490    | 7360    | 4070   | -570 | 150   | 460 | H0 |
| ATOM 724 HA THR A 45     | -41.595 | -14.915 | 42.111 | 1.00 | 42.74 | H0  |    |
| ANISOU 724 HA THR A 45   | 5340    | 6970    | 3940   | -640 | 280   | 330 | H0 |
| ATOM 725 HB THR A 45     | -40.751 | -13.548 | 40.439 | 1.00 | 41.26 | H0  |    |
| ANISOU 725 HB THR A 45   | 5110    | 6670    | 3890   | -600 | 270   | 200 | H0 |



|        |     |      |     |   |    |         |         |        |      |       |     |    |
|--------|-----|------|-----|---|----|---------|---------|--------|------|-------|-----|----|
| ATOM   | 726 | HG21 | THR | A | 45 | -40.805 | -12.558 | 42.595 | 1.00 | 42.70 | H0  |    |
| ANISOU | 726 | HG21 | THR | A | 45 | 5260    | 7090    | 3870   | -710 | 270   | 120 | H0 |
| ATOM   | 727 | HG22 | THR | A | 45 | -39.688 | -11.905 | 41.671 | 1.00 | 42.22 | H0  |    |
| ANISOU | 727 | HG22 | THR | A | 45 | 5170    | 6980    | 3890   | -690 | 250   | 70  | H0 |
| ATOM   | 728 | HG23 | THR | A | 45 | -39.278 | -12.954 | 42.792 | 1.00 | 43.30 | H0  |    |
| ANISOU | 728 | HG23 | THR | A | 45 | 5290    | 7240    | 3920   | -680 | 190   | 190 | H0 |
| ATOM   | 729 | N    | ASN | A | 46 | -40.037 | -17.295 | 40.782 | 1.00 | 41.64 | N0  |    |
| ANISOU | 729 | N    | ASN | A | 46 | 5250    | 6650    | 3920   | -480 | 230   | 580 | N0 |
| ATOM   | 730 | CA   | ASN | A | 46 | -39.993 | -18.355 | 39.737 | 1.00 | 40.87 | C0  |    |
| ANISOU | 730 | CA   | ASN | A | 46 | 5210    | 6400    | 3920   | -420 | 250   | 650 | C0 |
| ATOM   | 731 | C    | ASN | A | 46 | -39.636 | -17.713 | 38.388 | 1.00 | 40.06 | C0  |    |
| ANISOU | 731 | C    | ASN | A | 46 | 5070    | 6210    | 3930   | -390 | 250   | 560 | C0 |
| ATOM   | 732 | O    | ASN | A | 46 | -40.391 | -17.902 | 37.398 | 1.00 | 38.87 | O0  |    |
| ANISOU | 732 | O    | ASN | A | 46 | 4960    | 5940    | 3860   | -400 | 290   | 530 | O0 |
| ATOM   | 733 | CB   | ASN | A | 46 | -41.307 | -19.136 | 39.682 | 1.00 | 40.24 | C0  |    |
| ANISOU | 733 | CB   | ASN | A | 46 | 5200    | 6230    | 3850   | -470 | 310   | 680 | C0 |
| ATOM   | 734 | CG   | ASN | A | 46 | -41.365 | -20.271 | 40.680 | 1.00 | 41.38 | C0  |    |
| ANISOU | 734 | CG   | ASN | A | 46 | 5420    | 6390    | 3910   | -470 | 330   | 810 | C0 |
| ATOM   | 735 | OD1  | ASN | A | 46 | -40.351 | -20.901 | 40.969 | 1.00 | 41.28 | O0  |    |
| ANISOU | 735 | OD1  | ASN | A | 46 | 5420    | 6380    | 3870   | -380 | 290   | 920 | O0 |
| ATOM   | 736 | ND2  | ASN | A | 46 | -42.552 | -20.547 | 41.199 | 1.00 | 41.62 | N0  |    |
| ANISOU | 736 | ND2  | ASN | A | 46 | 5490    | 6430    | 3890   | -560 | 380   | 810 | N0 |
| ATOM   | 737 | H    | ASN | A | 46 | -39.473 | -17.446 | 41.480 | 1.00 | 42.48 | H0  |    |
| ANISOU | 737 | H    | ASN | A | 46 | 5340    | 6840    | 3960   | -460 | 190   | 630 | H0 |
| ATOM   | 738 | HA   | ASN | A | 46 | -39.276 | -18.988 | 39.976 | 1.00 | 41.53 | H0  |    |
| ANISOU | 738 | HA   | ASN | A | 46 | 5300    | 6490    | 3990   | -360 | 220   | 740 | H0 |
| ATOM   | 739 | HB2  | ASN | A | 46 | -42.048 | -18.523 | 39.857 | 1.00 | 40.09 | H0  |    |
| ANISOU | 739 | HB2  | ASN | A | 46 | 5160    | 6250    | 3820   | -530 | 330   | 600 | H0 |
| ATOM   | 740 | HB3  | ASN | A | 46 | -41.425 | -19.501 | 38.783 | 1.00 | 39.92 | H0  |    |
| ANISOU | 740 | HB3  | ASN | A | 46 | 5190    | 6090    | 3890   | -450 | 340   | 670 | H0 |
| ATOM   | 741 | HD21 | ASN | A | 46 | -42.609 | -21.004 | 41.954 | 1.00 | 42.49 | H0  |    |
| ANISOU | 741 | HD21 | ASN | A | 46 | 5640    | 6570    | 3930   | -570 | 390   | 880 | H0 |
| ATOM   | 742 | HD22 | ASN | A | 46 | -43.289 | -20.277 | 40.791 | 1.00 | 41.14 | H0  |    |
| ANISOU | 742 | HD22 | ASN | A | 46 | 5420    | 6340    | 3870   | -610 | 420   | 740 | H0 |
| ATOM   | 743 | N    | GLU | A | 47 | -38.532 | -16.966 | 38.349 | 1.00 | 40.49 | N0  |    |
| ANISOU | 743 | N    | GLU | A | 47 | 5060    | 6340    | 3990   | -370 | 200   | 520 | N0 |
| ATOM   | 744 | CA   | GLU | A | 47 | -38.027 | -16.308 | 37.115 | 1.00 | 40.90 | C0  |    |
| ANISOU | 744 | CA   | GLU | A | 47 | 5090    | 6320    | 4140   | -350 | 210   | 450 | C0 |
| ATOM   | 745 | C    | GLU | A | 47 | -36.561 | -16.691 | 36.906 | 1.00 | 41.97 | C0  |    |
| ANISOU | 745 | C    | GLU | A | 47 | 5170    | 6490    | 4290   | -270 | 170   | 500 | C0 |
| ATOM   | 746 | O    | GLU | A | 47 | -35.807 | -16.718 | 37.905 | 1.00 | 42.35 | O0  |    |
| ANISOU | 746 | O    | GLU | A | 47 | 5160    | 6680    | 4250   | -260 | 120   | 550 | O0 |
| ATOM   | 747 | CB   | GLU | A | 47 | -38.217 | -14.795 | 37.199 | 1.00 | 40.75 | C0  |    |
| ANISOU | 747 | CB   | GLU | A | 47 | 5030    | 6350    | 4100   | -410 | 220   | 310 | C0 |
| ATOM   | 748 | CG   | GLU | A | 47 | -39.677 | -14.394 | 37.273 | 1.00 | 41.16 | C0  |    |
| ANISOU | 748 | CG   | GLU | A | 47 | 5130    | 6370    | 4140   | -460 | 270   | 250 | C0 |
| ATOM   | 749 | CD   | GLU | A | 47 | -39.936 | -12.902 | 37.386 | 1.00 | 41.88 | C0  |    |
| ANISOU | 749 | CD   | GLU | A | 47 | 5210    | 6490    | 4220   | -510 | 290   | 130 | C0 |
| ATOM   | 750 | OE1  | GLU | A | 47 | -41.104 | -12.527 | 37.604 | 1.00 | 42.57 | O0  |    |
| ANISOU | 750 | OE1  | GLU | A | 47 | 5310    | 6580    | 4280   | -530 | 330   | 80  | O0 |
| ATOM   | 751 | OE2  | GLU | A | 47 | -38.975 | -12.120 | 37.249 | 1.00 | 44.12 | O0  |    |
| ANISOU | 751 | OE2  | GLU | A | 47 | 5460    | 6800    | 4500   | -520 | 280   | 70  | O0 |
| ATOM   | 752 | H    | GLU | A | 47 | -38.016 | -16.815 | 39.084 | 1.00 | 41.29 | H0  |    |
| ANISOU | 752 | H    | GLU | A | 47 | 5130    | 6540    | 4020   | -370 | 170   | 540 | H0 |

|        |     |      |     |   |    |         |         |        |      |       |     |    |
|--------|-----|------|-----|---|----|---------|---------|--------|------|-------|-----|----|
| ATOM   | 753 | HA   | GLU | A | 47 | -38.548 | -16.645 | 36.354 | 1.00 | 40.29 | H0  |    |
| ANISOU | 753 | HA   | GLU | A | 47 | 5050    | 6140    | 4120   | -340 | 240   | 450 | H0 |
| ATOM   | 754 | HB2  | GLU | A | 47 | -37.750 | -14.461 | 37.993 | 1.00 | 41.47 | H0  |    |
| ANISOU | 754 | HB2  | GLU | A | 47 | 5090    | 6550    | 4120   | -440 | 190   | 310 | H0 |
| ATOM   | 755 | HB3  | GLU | A | 47 | -37.809 | -14.382 | 36.410 | 1.00 | 40.46 | H0  |    |
| ANISOU | 755 | HB3  | GLU | A | 47 | 4990    | 6270    | 4120   | -400 | 230   | 270 | H0 |
| ATOM   | 756 | HG2  | GLU | A | 47 | -40.136 | -14.725 | 36.471 | 1.00 | 40.68 | H0  |    |
| ANISOU | 756 | HG2  | GLU | A | 47 | 5090    | 6220    | 4140   | -440 | 290   | 260 | H0 |
| ATOM   | 757 | HG3  | GLU | A | 47 | -40.087 | -14.835 | 38.047 | 1.00 | 41.64 | H0  |    |
| ANISOU | 757 | HG3  | GLU | A | 47 | 5190    | 6480    | 4150   | -480 | 270   | 300 | H0 |
| ATOM   | 758 | N    | VAL | A | 48 | -36.195 | -16.985 | 35.654 | 1.00 | 41.79 | N0  |    |
| ANISOU | 758 | N    | VAL | A | 48 | 5160    | 6350    | 4370   | -220 | 190   | 500 | N0 |
| ATOM   | 759 | CA   | VAL | A | 48 | -34.807 | -17.340 | 35.234 | 1.00 | 43.11 | C0  |    |
| ANISOU | 759 | CA   | VAL | A | 48 | 5270    | 6540    | 4570   | -140 | 160   | 550 | C0 |
| ATOM   | 760 | C    | VAL | A | 48 | -34.418 | -16.451 | 34.052 | 1.00 | 42.79 | C0  |    |
| ANISOU | 760 | C    | VAL | A | 48 | 5210    | 6450    | 4600   | -160 | 180   | 440 | C0 |
| ATOM   | 761 | O    | VAL | A | 48 | -35.288 | -16.179 | 33.204 | 1.00 | 42.40 | O0  |    |
| ANISOU | 761 | O    | VAL | A | 48 | 5220    | 6280    | 4610   | -190 | 230   | 390 | O0 |
| ATOM   | 762 | CB   | VAL | A | 48 | -34.659 | -18.835 | 34.876 | 1.00 | 43.41 | C0  |    |
| ANISOU | 762 | CB   | VAL | A | 48 | 5370    | 6470    | 4650   | -40  | 170   | 670 | C0 |
| ATOM   | 763 | CG1  | VAL | A | 48 | -34.996 | -19.734 | 36.049 | 1.00 | 44.75 | C0  |    |
| ANISOU | 763 | CG1  | VAL | A | 48 | 5590    | 6680    | 4740   | -10  | 160   | 780 | C0 |
| ATOM   | 764 | CG2  | VAL | A | 48 | -35.484 | -19.228 | 33.661 | 1.00 | 42.84 | C0  |    |
| ANISOU | 764 | CG2  | VAL | A | 48 | 5390    | 6220    | 4670   | -50  | 230   | 640 | C0 |
| ATOM   | 765 | H    | VAL | A | 48 | -36.787 | -16.980 | 34.962 | 1.00 | 41.27 | H0  |    |
| ANISOU | 765 | H    | VAL | A | 48 | 5140    | 6190    | 4350   | -230 | 220   | 480 | H0 |
| ATOM   | 766 | HA   | VAL | A | 48 | -34.209 | -17.144 | 35.974 | 1.00 | 43.70 | H0  |    |
| ANISOU | 766 | HA   | VAL | A | 48 | 5290    | 6740    | 4580   | -140 | 120   | 560 | H0 |
| ATOM   | 767 | HB   | VAL | A | 48 | -33.708 | -18.986 | 34.650 | 1.00 | 43.98 | H0  |    |
| ANISOU | 767 | HB   | VAL | A | 48 | 5390    | 6580    | 4740   | 20   | 150   | 690 | H0 |
| ATOM   | 768 | HG11 | VAL | A | 48 | -34.457 | -19.480 | 36.819 | 1.00 | 45.29 | H0  |    |
| ANISOU | 768 | HG11 | VAL | A | 48 | 5590    | 6880    | 4730   | 0    | 110   | 800 | H0 |
| ATOM   | 769 | HG12 | VAL | A | 48 | -34.808 | -20.659 | 35.814 | 1.00 | 45.09 | H0  |    |
| ANISOU | 769 | HG12 | VAL | A | 48 | 5680    | 6650    | 4810   | 60   | 170   | 860 | H0 |
| ATOM   | 770 | HG13 | VAL | A | 48 | -35.939 | -19.640 | 36.269 | 1.00 | 44.31 | H0  |    |
| ANISOU | 770 | HG13 | VAL | A | 48 | 5580    | 6600    | 4660   | -80  | 180   | 760 | H0 |
| ATOM   | 771 | HG21 | VAL | A | 48 | -36.399 | -18.917 | 33.774 | 1.00 | 42.29 | H0  |    |
| ANISOU | 771 | HG21 | VAL | A | 48 | 5350    | 6140    | 4580   | -110 | 250   | 600 | H0 |
| ATOM   | 772 | HG22 | VAL | A | 48 | -35.481 | -20.196 | 33.568 | 1.00 | 43.18 | H0  |    |
| ANISOU | 772 | HG22 | VAL | A | 48 | 5480    | 6190    | 4730   | 0    | 250   | 710 | H0 |
| ATOM   | 773 | HG23 | VAL | A | 48 | -35.101 | -18.826 | 32.862 | 1.00 | 42.29 | H0  |    |
| ANISOU | 773 | HG23 | VAL | A | 48 | 5290    | 6120    | 4650   | -40  | 240   | 590 | H0 |
| ATOM   | 774 | N    | ASP | A | 49 | -33.154 | -16.028 | 34.025 | 1.00 | 43.37 | N0  |    |
| ANISOU | 774 | N    | ASP | A | 49 | 5190    | 6620    | 4670   | -150 | 160   | 420 | N0 |
| ATOM   | 775 | CA   | ASP | A | 49 | -32.480 | -15.356 | 32.886 | 1.00 | 43.05 | C0  |    |
| ANISOU | 775 | CA   | ASP | A | 49 | 5120    | 6540    | 4700   | -170 | 190   | 340 | C0 |
| ATOM   | 776 | C    | ASP | A | 49 | -31.511 | -16.378 | 32.276 | 1.00 | 42.93 | C0  |    |
| ANISOU | 776 | C    | ASP | A | 49 | 5070    | 6500    | 4740   | -60  | 180   | 420 | C0 |
| ATOM   | 777 | O    | ASP | A | 49 | -30.630 | -16.851 | 33.024 | 1.00 | 43.84 | O0  |    |
| ANISOU | 777 | O    | ASP | A | 49 | 5100    | 6750    | 4800   | 10   | 130   | 480 | O0 |
| ATOM   | 778 | CB   | ASP | A | 49 | -31.774 | -14.091 | 33.388 | 1.00 | 44.42 | C0  |    |
| ANISOU | 778 | CB   | ASP | A | 49 | 5210    | 6850    | 4820   | -260 | 170   | 250 | C0 |
| ATOM   | 779 | CG   | ASP | A | 49 | -31.566 | -12.995 | 32.356 | 1.00 | 43.87 | C0  |    |
| ANISOU | 779 | CG   | ASP | A | 49 | 5160    | 6710    | 4800   | -330 | 230   | 140 | C0 |

|        |     |               |         |         |        |      |         |    |
|--------|-----|---------------|---------|---------|--------|------|---------|----|
| ATOM   | 780 | OD1 ASP A 49  | -31.556 | -13.308 | 31.154 | 1.00 | 43.61   | O0 |
| ANISOU | 780 | OD1 ASP A 49  | 5170    | 6550    | 4850   | -280 | 270 150 | O0 |
| ATOM   | 781 | OD2 ASP A 49  | -31.383 | -11.833 | 32.773 | 1.00 | 44.56   | O0 |
| ANISOU | 781 | OD2 ASP A 49  | 5230    | 6860    | 4850   | -430 | 240 40  | O0 |
| ATOM   | 782 | H ASP A 49    | -32.602 | -16.132 | 34.742 | 1.00 | 44.15   | H0 |
| ANISOU | 782 | H ASP A 49    | 5230    | 6830    | 4710   | -140 | 120 450 | H0 |
| ATOM   | 783 | HA ASP A 49   | -33.157 | -15.106 | 32.214 | 1.00 | 42.31   | H0 |
| ANISOU | 783 | HA ASP A 49   | 5090    | 6340    | 4650   | -190 | 220 300 | H0 |
| ATOM   | 784 | HB2 ASP A 49  | -32.293 | -13.715 | 34.127 | 1.00 | 44.26   | H0 |
| ANISOU | 784 | HB2 ASP A 49  | 5210    | 6870    | 4740   | -310 | 160 220 | H0 |
| ATOM   | 785 | HB3 ASP A 49  | -30.894 | -14.340 | 33.736 | 1.00 | 45.01   | H0 |
| ANISOU | 785 | HB3 ASP A 49  | 5210    | 7030    | 4870   | -230 | 140 270 | H0 |
| ATOM   | 786 | N VAL A 50    | -31.683 | -16.741 | 30.999 | 1.00 | 41.37   | N0 |
| ANISOU | 786 | N VAL A 50    | 4940    | 6160    | 4630   | -20  | 230 410 | N0 |
| ATOM   | 787 | CA VAL A 50   | -30.863 | -17.797 | 30.325 | 1.00 | 41.73   | C0 |
| ANISOU | 787 | CA VAL A 50   | 4970    | 6160    | 4730   | 100  | 240 480 | C0 |
| ATOM   | 788 | C VAL A 50    | -30.402 | -17.317 | 28.941 | 1.00 | 40.45   | C0 |
| ANISOU | 788 | C VAL A 50    | 4800    | 5920    | 4640   | 80   | 290 400 | C0 |
| ATOM   | 789 | O VAL A 50    | -31.131 | -16.556 | 28.289 | 1.00 | 38.48   | O0 |
| ANISOU | 789 | O VAL A 50    | 4610    | 5590    | 4410   | 0    | 330 330 | O0 |
| ATOM   | 790 | CB VAL A 50   | -31.615 | -19.139 | 30.213 | 1.00 | 41.66   | C0 |
| ANISOU | 790 | CB VAL A 50   | 5070    | 6010    | 4750   | 170  | 270 570 | C0 |
| ATOM   | 791 | CG1 VAL A 50  | -31.933 | -19.720 | 31.580 | 1.00 | 42.48   | C0 |
| ANISOU | 791 | CG1 VAL A 50  | 5180    | 6180    | 4780   | 190  | 230 660 | C0 |
| ATOM   | 792 | CG2 VAL A 50  | -32.874 | -19.026 | 29.370 | 1.00 | 40.23   | C0 |
| ANISOU | 792 | CG2 VAL A 50  | 4990    | 5680    | 4610   | 100  | 310 520 | C0 |
| ATOM   | 793 | H VAL A 50    | -32.313 | -16.365 | 30.459 | 1.00 | 40.81   | H0 |
| ANISOU | 793 | H VAL A 50    | 4920    | 6000    | 4580   | -60  | 260 370 | H0 |
| ATOM   | 794 | HA VAL A 50   | -30.069 | -17.947 | 30.867 | 1.00 | 42.44   | H0 |
| ANISOU | 794 | HA VAL A 50   | 4980    | 6360    | 4790   | 140  | 210 510 | H0 |
| ATOM   | 795 | HB VAL A 50   | -31.010 | -19.774 | 29.756 | 1.00 | 42.08   | H0 |
| ANISOU | 795 | HB VAL A 50   | 5120    | 6030    | 4840   | 240  | 280 610 | H0 |
| ATOM   | 796 | HG11 VAL A 50 | -31.117 | -19.776 | 32.107 | 1.00 | 43.27   | H0 |
| ANISOU | 796 | HG11 VAL A 50 | 5210    | 6390    | 4840   | 240  | 190 700 | H0 |
| ATOM   | 797 | HG12 VAL A 50 | -32.312 | -20.610 | 31.475 | 1.00 | 42.66   | H0 |
| ANISOU | 797 | HG12 VAL A 50 | 5280    | 6100    | 4820   | 230  | 250 720 | H0 |
| ATOM   | 798 | HG13 VAL A 50 | -32.574 | -19.147 | 32.036 | 1.00 | 42.06   | H0 |
| ANISOU | 798 | HG13 VAL A 50 | 5140    | 6160    | 4680   | 110  | 220 630 | H0 |
| ATOM   | 799 | HG21 VAL A 50 | -33.443 | -18.322 | 29.726 | 1.00 | 39.90   | H0 |
| ANISOU | 799 | HG21 VAL A 50 | 4950    | 5670    | 4540   | 30   | 300 470 | H0 |
| ATOM   | 800 | HG22 VAL A 50 | -33.356 | -19.872 | 29.392 | 1.00 | 40.49   | H0 |
| ANISOU | 800 | HG22 VAL A 50 | 5090    | 5640    | 4650   | 120  | 330 570 | H0 |
| ATOM   | 801 | HG23 VAL A 50 | -32.635 | -18.816 | 28.452 | 1.00 | 39.97   | H0 |
| ANISOU | 801 | HG23 VAL A 50 | 4960    | 5600    | 4620   | 100  | 340 470 | H0 |
| ATOM   | 802 | N VAL A 51    | -29.211 | -17.769 | 28.537 | 1.00 | 41.25   | N0 |
| ANISOU | 802 | N VAL A 51    | 4830    | 6070    | 4780   | 160  | 300 430 | N0 |
| ATOM   | 803 | CA VAL A 51   | -28.634 | -17.622 | 27.168 | 1.00 | 40.32   | C0 |
| ANISOU | 803 | CA VAL A 51   | 4710    | 5890    | 4730   | 170  | 360 370 | C0 |
| ATOM   | 804 | C VAL A 51    | -28.632 | -19.012 | 26.531 | 1.00 | 40.10   | C0 |
| ANISOU | 804 | C VAL A 51    | 4740    | 5730    | 4760   | 290  | 390 440 | C0 |
| ATOM   | 805 | O VAL A 51    | -28.137 | -19.953 | 27.172 | 1.00 | 40.91   | O0 |
| ANISOU | 805 | O VAL A 51    | 4810    | 5880    | 4850   | 410  | 360 540 | O0 |
| ATOM   | 806 | CB VAL A 51   | -27.216 | -17.022 | 27.192 | 1.00 | 40.92   | C0 |
| ANISOU | 806 | CB VAL A 51   | 4630    | 6120    | 4790   | 160  | 350 330 | C0 |

|        |     |               |         |         |        |      |       |     |    |
|--------|-----|---------------|---------|---------|--------|------|-------|-----|----|
| ATOM   | 807 | CG1 VAL A 51  | -26.676 | -16.820 | 25.782 | 1.00 | 40.67 | C0  |    |
| ANISOU | 807 | CG1 VAL A 51  | 4600    | 6020    | 4830   | 150  | 420   | 270 | C0 |
| ATOM   | 808 | CG2 VAL A 51  | -27.155 | -15.727 | 27.984 | 1.00 | 40.77 | C0  |    |
| ANISOU | 808 | CG2 VAL A 51  | 4550    | 6230    | 4710   | 30   | 320   | 250 | C0 |
| ATOM   | 809 | H VAL A 51    | -28.653 | -18.216 | 29.102 | 1.00 | 41.91 | H0  |    |
| ANISOU | 809 | H VAL A 51    | 4850    | 6240    | 4840   | 220  | 270   | 480 | H0 |
| ATOM   | 810 | HA VAL A 51   | -29.211 | -17.039 | 26.650 | 1.00 | 39.51 | H0  |    |
| ANISOU | 810 | HA VAL A 51   | 4660    | 5710    | 4640   | 100  | 390   | 320 | H0 |
| ATOM   | 811 | HB VAL A 51   | -26.629 | -17.677 | 27.644 | 1.00 | 41.82 | H0  |    |
| ANISOU | 811 | HB VAL A 51   | 4680    | 6310    | 4890   | 250  | 320   | 390 | H0 |
| ATOM   | 812 | HG11 VAL A 51 | -26.451 | -17.682 | 25.392 | 1.00 | 41.01 | H0  |    |
| ANISOU | 812 | HG11 VAL A 51 | 4660    | 6020    | 4910   | 250  | 440   | 310 | H0 |
| ATOM   | 813 | HG12 VAL A 51 | -25.879 | -16.263 | 25.815 | 1.00 | 41.21 | H0  |    |
| ANISOU | 813 | HG12 VAL A 51 | 4580    | 6200    | 4880   | 110  | 430   | 220 | H0 |
| ATOM   | 814 | HG13 VAL A 51 | -27.352 | -16.384 | 25.234 | 1.00 | 39.85 | H0  |    |
| ANISOU | 814 | HG13 VAL A 51 | 4590    | 5820    | 4740   | 90   | 450   | 230 | H0 |
| ATOM   | 815 | HG21 VAL A 51 | -27.825 | -15.108 | 27.647 | 1.00 | 40.02 | H0  |    |
| ANISOU | 815 | HG21 VAL A 51 | 4540    | 6050    | 4620   | -50  | 350   | 200 | H0 |
| ATOM   | 816 | HG22 VAL A 51 | -26.271 | -15.330 | 27.892 | 1.00 | 41.43 | H0  |    |
| ANISOU | 816 | HG22 VAL A 51 | 4550    | 6410    | 4780   | 0    | 330   | 210 | H0 |
| ATOM   | 817 | HG23 VAL A 51 | -27.329 | -15.912 | 28.923 | 1.00 | 41.16 | H0  |    |
| ANISOU | 817 | HG23 VAL A 51 | 4580    | 6350    | 4710   | 40   | 280   | 290 | H0 |
| ATOM   | 818 | N PHE A 52    | -29.179 | -19.135 | 25.326 | 1.00 | 38.97 | N0  |    |
| ANISOU | 818 | N PHE A 52    | 4700    | 5440    | 4670   | 280  | 450   | 410 | N0 |
| ATOM   | 819 | CA PHE A 52   | -29.271 | -20.420 | 24.592 | 1.00 | 39.66 | C0  |    |
| ANISOU | 819 | CA PHE A 52   | 4870    | 5380    | 4810   | 370  | 500   | 450 | C0 |
| ATOM   | 820 | C PHE A 52    | -29.241 | -20.162 | 23.084 | 1.00 | 39.34 | C0  |    |
| ANISOU | 820 | C PHE A 52    | 4870    | 5250    | 4820   | 340  | 560   | 370 | C0 |
| ATOM   | 821 | O PHE A 52    | -29.619 | -19.052 | 22.636 | 1.00 | 38.04 | O0  |    |
| ANISOU | 821 | O PHE A 52    | 4720    | 5090    | 4640   | 240  | 570   | 300 | O0 |
| ATOM   | 822 | CB PHE A 52   | -30.548 | -21.154 | 24.997 | 1.00 | 39.51 | C0  |    |
| ANISOU | 822 | CB PHE A 52   | 4970    | 5260    | 4780   | 350  | 500   | 500 | C0 |
| ATOM   | 823 | CG PHE A 52   | -31.808 | -20.397 | 24.674 | 1.00 | 38.79 | C0  |    |
| ANISOU | 823 | CG PHE A 52   | 4940    | 5120    | 4680   | 230  | 500   | 430 | C0 |
| ATOM   | 824 | CD1 PHE A 52  | -32.316 | -19.459 | 25.557 | 1.00 | 38.69 | C0  |    |
| ANISOU | 824 | CD1 PHE A 52  | 4900    | 5200    | 4610   | 150  | 450   | 410 | C0 |
| ATOM   | 825 | CD2 PHE A 52  | -32.470 | -20.605 | 23.474 | 1.00 | 38.41 | C0  |    |
| ANISOU | 825 | CD2 PHE A 52  | 4980    | 4950    | 4660   | 200  | 550   | 380 | C0 |
| ATOM   | 826 | CE1 PHE A 52  | -33.470 | -18.754 | 25.249 | 1.00 | 38.25 | C0  |    |
| ANISOU | 826 | CE1 PHE A 52  | 4890    | 5110    | 4530   | 70   | 460   | 350 | C0 |
| ATOM   | 827 | CE2 PHE A 52  | -33.625 | -19.904 | 23.172 | 1.00 | 37.61 | C0  |    |
| ANISOU | 827 | CE2 PHE A 52  | 4920    | 4830    | 4530   | 110  | 540   | 320 | C0 |
| ATOM   | 828 | CZ PHE A 52   | -34.125 | -18.982 | 24.061 | 1.00 | 37.49 | C0  |    |
| ANISOU | 828 | CZ PHE A 52   | 4870    | 4900    | 4470   | 50   | 500   | 310 | C0 |
| ATOM   | 829 | H PHE A 52    | -29.542 | -18.439 | 24.864 | 1.00 | 38.49 | H0  |    |
| ANISOU | 829 | H PHE A 52    | 4660    | 5350    | 4610   | 200  | 470   | 350 | H0 |
| ATOM   | 830 | HA PHE A 52   | -28.491 | -20.978 | 24.832 | 1.00 | 40.55 | H0  |    |
| ANISOU | 830 | HA PHE A 52   | 4930    | 5540    | 4940   | 460  | 490   | 500 | H0 |
| ATOM   | 831 | HB2 PHE A 52  | -30.569 | -22.020 | 24.539 | 1.00 | 39.94 | H0  |    |
| ANISOU | 831 | HB2 PHE A 52  | 5090    | 5220    | 4870   | 410  | 530   | 530 | H0 |
| ATOM   | 832 | HB3 PHE A 52  | -30.517 | -21.324 | 25.962 | 1.00 | 40.03 | H0  |    |
| ANISOU | 832 | HB3 PHE A 52  | 5010    | 5390    | 4810   | 370  | 460   | 550 | H0 |
| ATOM   | 833 | HD1 PHE A 52  | -31.873 | -19.300 | 26.374 | 1.00 | 39.13 | H0  |    |
| ANISOU | 833 | HD1 PHE A 52  | 4890    | 5350    | 4630   | 170  | 420   | 440 | H0 |

|        |     |           |    |         |         |        |      |       |     |    |
|--------|-----|-----------|----|---------|---------|--------|------|-------|-----|----|
| ATOM   | 834 | HD2 PHE A | 52 | -32.134 | -21.239 | 22.862 | 1.00 | 38.78 | H0  |    |
| ANISOU | 834 | HD2 PHE A | 52 | 5060    | 4930    | 4740   | 250  | 580   | 390 | H0 |
| ATOM   | 835 | HE1 PHE A | 52 | -33.812 | -18.123 | 25.861 | 1.00 | 37.82 | H0  |    |
| ANISOU | 835 | HE1 PHE A | 52 | 4820    | 5110    | 4440   | 20   | 430   | 330 | H0 |
| ATOM   | 836 | HE2 PHE A | 52 | -34.071 | -20.061 | 22.355 | 1.00 | 37.42 | H0  |    |
| ANISOU | 836 | HE2 PHE A | 52 | 4950    | 4740    | 4520   | 90   | 570   | 290 | H0 |
| ATOM   | 837 | HZ PHE A  | 52 | -34.911 | -18.502 | 23.854 | 1.00 | 36.97 | H0  |    |
| ANISOU | 837 | HZ PHE A  | 52 | 4830    | 4830    | 4390   | 0    | 500   | 270 | H0 |
| ATOM   | 838 | N TRP A   | 53 | -28.799 | -21.160 | 22.318 | 1.00 | 40.13 | N0  |    |
| ANISOU | 838 | N TRP A   | 53 | 5010    | 5260    | 4980   | 430  | 620   | 390 | N0 |
| ATOM   | 839 | CA TRP A  | 53 | -28.981 | -21.179 | 20.846 | 1.00 | 40.04 | C0  |    |
| ANISOU | 839 | CA TRP A  | 53 | 5070    | 5140    | 5000   | 400  | 680   | 330 | C0 |
| ATOM   | 840 | C TRP A   | 53 | -30.357 | -21.776 | 20.564 | 1.00 | 39.80 | C0  |    |
| ANISOU | 840 | C TRP A   | 53 | 5180    | 4970    | 4970   | 360  | 700   | 320 | C0 |
| ATOM   | 841 | O TRP A   | 53 | -30.630 | -22.886 | 21.049 | 1.00 | 40.40 | O0  |    |
| ANISOU | 841 | O TRP A   | 53 | 5310    | 4980    | 5060   | 410  | 700   | 390 | O0 |
| ATOM   | 842 | CB TRP A  | 53 | -27.874 | -21.955 | 20.123 | 1.00 | 40.91 | C0  |    |
| ANISOU | 842 | CB TRP A  | 53 | 5150    | 5220    | 5160   | 510  | 740   | 330 | C0 |
| ATOM   | 843 | CG TRP A  | 53 | -26.481 | -21.536 | 20.470 | 1.00 | 41.38 | C0  |    |
| ANISOU | 843 | CG TRP A  | 53 | 5050    | 5450    | 5220   | 570  | 730   | 340 | C0 |
| ATOM   | 844 | CD1 TRP A | 53 | -26.069 | -20.334 | 20.962 | 1.00 | 41.02 | C0  |    |
| ANISOU | 844 | CD1 TRP A | 53 | 4900    | 5550    | 5140   | 490  | 690   | 300 | C0 |
| ATOM   | 845 | CD2 TRP A | 53 | -25.294 | -22.330 | 20.313 | 1.00 | 42.88 | C0  |    |
| ANISOU | 845 | CD2 TRP A | 53 | 5170    | 5670    | 5450   | 710  | 770   | 370 | C0 |
| ATOM   | 846 | NE1 TRP A | 53 | -24.712 | -20.334 | 21.143 | 1.00 | 42.19 | N0  |    |
| ANISOU | 846 | NE1 TRP A | 53 | 4900    | 5840    | 5290   | 560  | 690   | 300 | N0 |
| ATOM   | 847 | CE2 TRP A | 53 | -24.209 | -21.544 | 20.753 | 1.00 | 43.29 | C0  |    |
| ANISOU | 847 | CE2 TRP A | 53 | 5050    | 5920    | 5480   | 710  | 730   | 350 | C0 |
| ATOM   | 848 | CE3 TRP A | 53 | -25.048 | -23.630 | 19.859 | 1.00 | 43.96 | C0  |    |
| ANISOU | 848 | CE3 TRP A | 53 | 5370    | 5690    | 5640   | 850  | 830   | 410 | C0 |
| ATOM   | 849 | CZ2 TRP A | 53 | -22.898 | -22.015 | 20.740 | 1.00 | 45.07 | C0  |    |
| ANISOU | 849 | CZ2 TRP A | 53 | 5140    | 6260    | 5730   | 840  | 750   | 370 | C0 |
| ATOM   | 850 | CZ3 TRP A | 53 | -23.754 | -24.099 | 19.854 | 1.00 | 45.63 | C0  |    |
| ANISOU | 850 | CZ3 TRP A | 53 | 5470    | 5990    | 5880   | 990  | 850   | 440 | C0 |
| ATOM   | 851 | CH2 TRP A | 53 | -22.697 | -23.300 | 20.291 | 1.00 | 46.23 | C0  |    |
| ANISOU | 851 | CH2 TRP A | 53 | 5350    | 6290    | 5930   | 990  | 810   | 420 | C0 |
| ATOM   | 852 | H TRP A   | 53 | -28.363 | -21.890 | 22.647 | 1.00 | 40.95 | H0  |    |
| ANISOU | 852 | H TRP A   | 53 | 5100    | 5370    | 5090   | 520  | 620   | 450 | H0 |
| ATOM   | 853 | HA TRP A  | 53 | -28.960 | -20.250 | 20.524 | 1.00 | 39.49 | H0  |    |
| ANISOU | 853 | HA TRP A  | 53 | 4980    | 5110    | 4920   | 330  | 680   | 270 | H0 |
| ATOM   | 854 | HB2 TRP A | 53 | -27.981 | -22.905 | 20.333 | 1.00 | 41.41 | H0  |    |
| ANISOU | 854 | HB2 TRP A | 53 | 5270    | 5220    | 5250   | 590  | 760   | 380 | H0 |
| ATOM   | 855 | HB3 TRP A | 53 | -28.007 | -21.848 | 19.159 | 1.00 | 40.56 | H0  |    |
| ANISOU | 855 | HB3 TRP A | 53 | 5160    | 5120    | 5130   | 480  | 790   | 280 | H0 |
| ATOM   | 856 | HD1 TRP A | 53 | -26.635 | -19.606 | 21.166 | 1.00 | 40.37 | H0  |    |
| ANISOU | 856 | HD1 TRP A | 53 | 4840    | 5480    | 5030   | 400  | 670   | 270 | H0 |
| ATOM   | 857 | HE1 TRP A | 53 | -24.245 | -19.664 | 21.453 | 1.00 | 42.47 | H0  |    |
| ANISOU | 857 | HE1 TRP A | 53 | 4840    | 5990    | 5300   | 510  | 670   | 270 | H0 |
| ATOM   | 858 | HE3 TRP A | 53 | -25.759 | -24.177 | 19.564 | 1.00 | 43.71 | H0  |    |
| ANISOU | 858 | HE3 TRP A | 53 | 5460    | 5530    | 5620   | 840  | 850   | 410 | H0 |
| ATOM   | 859 | HZ2 TRP A | 53 | -22.183 | -21.479 | 21.039 | 1.00 | 45.53 | H0  |    |
| ANISOU | 859 | HZ2 TRP A | 53 | 5070    | 6460    | 5760   | 820  | 730   | 350 | H0 |
| ATOM   | 860 | HZ3 TRP A | 53 | -23.577 | -24.974 | 19.548 | 1.00 | 46.30 | H0  |    |
| ANISOU | 860 | HZ3 TRP A | 53 | 5610    | 5990    | 6000   | 1100 | 900   | 460 | H0 |

|        |     |      |     |   |    |         |         |        |      |       |     |    |
|--------|-----|------|-----|---|----|---------|---------|--------|------|-------|-----|----|
| ATOM   | 861 | HH2  | TRP | A | 53 | -21.825 | -23.647 | 20.275 | 1.00 | 47.22 | H0  |    |
| ANISOU | 861 | HH2  | TRP | A | 53 | 5390    | 6480    | 6070   | 1100 | 830   | 440 | H0 |
| ATOM   | 862 | N    | GLN | A | 54 | -31.202 | -21.035 | 19.854 | 1.00 | 39.88 | N0  |    |
| ANISOU | 862 | N    | GLN | A | 54 | 5240    | 4960    | 4960   | 260  | 700   | 260 | N0 |
| ATOM   | 863 | CA   | GLN | A | 54 | -32.488 | -21.547 | 19.323 | 1.00 | 40.79 | C0  |    |
| ANISOU | 863 | CA   | GLN | A | 54 | 5470    | 4970    | 5070   | 210  | 720   | 230 | C0 |
| ATOM   | 864 | C    | GLN | A | 54 | -32.179 | -22.131 | 17.943 | 1.00 | 40.69 | C0  |    |
| ANISOU | 864 | C    | GLN | A | 54 | 5510    | 4860    | 5090   | 230  | 790   | 180 | C0 |
| ATOM   | 865 | O    | GLN | A | 54 | -32.270 | -21.390 | 16.947 | 1.00 | 38.86 | O0  |    |
| ANISOU | 865 | O    | GLN | A | 54 | 5290    | 4640    | 4840   | 190  | 810   | 120 | O0 |
| ATOM   | 866 | CB   | GLN | A | 54 | -33.534 | -20.432 | 19.306 | 1.00 | 41.12 | C0  |    |
| ANISOU | 866 | CB   | GLN | A | 54 | 5510    | 5050    | 5060   | 120  | 680   | 180 | C0 |
| ATOM   | 867 | CG   | GLN | A | 54 | -34.957 | -20.945 | 19.171 | 1.00 | 42.48 | C0  |    |
| ANISOU | 867 | CG   | GLN | A | 54 | 5760    | 5170    | 5210   | 60   | 680   | 170 | C0 |
| ATOM   | 868 | CD   | GLN | A | 54 | -35.960 | -19.845 | 19.424 | 1.00 | 43.65 | C0  |    |
| ANISOU | 868 | CD   | GLN | A | 54 | 5890    | 5390    | 5300   | -10  | 630   | 140 | C0 |
| ATOM   | 869 | OE1  | GLN | A | 54 | -36.089 | -19.341 | 20.541 | 1.00 | 44.73 | O0  |    |
| ANISOU | 869 | OE1  | GLN | A | 54 | 5980    | 5590    | 5420   | -20  | 590   | 160 | O0 |
| ATOM   | 870 | NE2  | GLN | A | 54 | -36.672 | -19.456 | 18.379 | 1.00 | 43.96 | N0  |    |
| ANISOU | 870 | NE2  | GLN | A | 54 | 5970    | 5420    | 5320   | -40  | 640   | 80  | N0 |
| ATOM   | 871 | H    | GLN | A | 54 | -31.040 | -20.162 | 19.650 | 1.00 | 39.56 | H0  |    |
| ANISOU | 871 | H    | GLN | A | 54 | 5160    | 4960    | 4900   | 220  | 700   | 220 | H0 |
| ATOM   | 872 | HA   | GLN | A | 54 | -32.805 | -22.271 | 19.911 | 1.00 | 41.03 | H0  |    |
| ANISOU | 872 | HA   | GLN | A | 54 | 5530    | 4960    | 5100   | 230  | 710   | 270 | H0 |
| ATOM   | 873 | HB2  | GLN | A | 54 | -33.455 | -19.919 | 20.137 | 1.00 | 41.03 | H0  |    |
| ANISOU | 873 | HB2  | GLN | A | 54 | 5450    | 5110    | 5030   | 110  | 640   | 200 | H0 |
| ATOM   | 874 | HB3  | GLN | A | 54 | -33.338 | -19.828 | 18.561 | 1.00 | 40.92 | H0  |    |
| ANISOU | 874 | HB3  | GLN | A | 54 | 5490    | 5030    | 5030   | 100  | 700   | 140 | H0 |
| ATOM   | 875 | HG2  | GLN | A | 54 | -35.090 | -21.307 | 18.269 | 1.00 | 42.68 | H0  |    |
| ANISOU | 875 | HG2  | GLN | A | 54 | 5840    | 5140    | 5240   | 50   | 710   | 130 | H0 |
| ATOM   | 876 | HG3  | GLN | A | 54 | -35.105 | -21.671 | 19.814 | 1.00 | 42.92 | H0  |    |
| ANISOU | 876 | HG3  | GLN | A | 54 | 5840    | 5200    | 5270   | 70   | 680   | 210 | H0 |
| ATOM   | 877 | HE21 | GLN | A | 54 | -37.458 | -19.066 | 18.501 | 1.00 | 43.52 | H0  |    |
| ANISOU | 877 | HE21 | GLN | A | 54 | 5910    | 5390    | 5230   | -70  | 620   | 60  | H0 |
| ATOM   | 878 | HE22 | GLN | A | 54 | -36.364 | -19.582 | 17.559 | 1.00 | 43.88 | H0  |    |
| ANISOU | 878 | HE22 | GLN | A | 54 | 5990    | 5370    | 5310   | -30  | 670   | 50  | H0 |
| ATOM   | 879 | N    | GLN | A | 55 | -31.749 | -23.393 | 17.914 | 1.00 | 41.71 | N0  |    |
| ANISOU | 879 | N    | GLN | A | 55 | 5690    | 4900    | 5260   | 310  | 840   | 220 | N0 |
| ATOM   | 880 | CA   | GLN | A | 55 | -31.279 | -24.078 | 16.683 | 1.00 | 43.04 | C0  |    |
| ANISOU | 880 | CA   | GLN | A | 55 | 5910    | 4970    | 5460   | 350  | 920   | 180 | C0 |
| ATOM   | 881 | C    | GLN | A | 55 | -32.509 | -24.470 | 15.865 | 1.00 | 42.30 | C0  |    |
| ANISOU | 881 | C    | GLN | A | 55 | 5940    | 4790    | 5350   | 260  | 950   | 110 | C0 |
| ATOM   | 882 | O    | GLN | A | 55 | -33.256 | -25.367 | 16.304 | 1.00 | 41.37 | O0  |    |
| ANISOU | 882 | O    | GLN | A | 55 | 5900    | 4590    | 5230   | 230  | 960   | 140 | O0 |
| ATOM   | 883 | CB   | GLN | A | 55 | -30.391 | -25.270 | 17.034 | 1.00 | 44.71 | C0  |    |
| ANISOU | 883 | CB   | GLN | A | 55 | 6140    | 5120    | 5730   | 490  | 970   | 240 | C0 |
| ATOM   | 884 | CG   | GLN | A | 55 | -29.142 | -24.870 | 17.807 | 1.00 | 45.92 | C0  |    |
| ANISOU | 884 | CG   | GLN | A | 55 | 6150    | 5400    | 5890   | 580  | 930   | 300 | C0 |
| ATOM   | 885 | CD   | GLN | A | 55 | -28.222 | -26.038 | 18.061 | 1.00 | 48.09 | C0  |    |
| ANISOU | 885 | CD   | GLN | A | 55 | 6430    | 5630    | 6220   | 750  | 980   | 370 | C0 |
| ATOM   | 886 | OE1  | GLN | A | 55 | -27.059 | -26.033 | 17.668 | 1.00 | 50.37 | O0  |    |
| ANISOU | 886 | OE1  | GLN | A | 55 | 6630    | 5970    | 6530   | 840  | 1010  | 360 | O0 |
| ATOM   | 887 | NE2  | GLN | A | 55 | -28.748 | -27.064 | 18.708 | 1.00 | 49.57 | N0  |    |
| ANISOU | 887 | NE2  | GLN | A | 55 | 6720    | 5710    | 6410   | 790  | 990   | 440 | N0 |

|        |     |      |     |   |    |         |         |        |      |       |      |    |
|--------|-----|------|-----|---|----|---------|---------|--------|------|-------|------|----|
| ATOM   | 888 | H    | GLN | A | 55 | -31.721 | -23.917 | 18.658 | 1.00 | 42.29 | H0   |    |
| ANISOU | 888 | H    | GLN | A | 55 | 5760    | 4960    | 5340   | 350  | 830   | 280  | H0 |
| ATOM   | 889 | HA   | GLN | A | 55 | -30.747 | -23.436 | 16.161 | 1.00 | 42.68 | H0   |    |
| ANISOU | 889 | HA   | GLN | A | 55 | 5820    | 4980    | 5420   | 350  | 930   | 140  | H0 |
| ATOM   | 890 | HB2  | GLN | A | 55 | -30.912 | -25.903 | 17.568 | 1.00 | 45.10 | H0   |    |
| ANISOU | 890 | HB2  | GLN | A | 55 | 6250    | 5110    | 5780   | 480  | 960   | 280  | H0 |
| ATOM   | 891 | HB3  | GLN | A | 55 | -30.127 | -25.720 | 16.205 | 1.00 | 45.28 | H0   |    |
| ANISOU | 891 | HB3  | GLN | A | 55 | 6250    | 5120    | 5820   | 510  | 1030  | 200  | H0 |
| ATOM   | 892 | HG2  | GLN | A | 55 | -28.656 | -24.184 | 17.302 | 1.00 | 45.64 | H0   |    |
| ANISOU | 892 | HG2  | GLN | A | 55 | 6050    | 5430    | 5860   | 570  | 940   | 250  | H0 |
| ATOM   | 893 | HG3  | GLN | A | 55 | -29.406 | -24.479 | 18.667 | 1.00 | 45.54 | H0   |    |
| ANISOU | 893 | HG3  | GLN | A | 55 | 6060    | 5420    | 5820   | 560  | 870   | 330  | H0 |
| ATOM   | 894 | HE21 | GLN | A | 55 | -28.386 | -27.867 | 18.633 | 1.00 | 50.27 | H0   |    |
| ANISOU | 894 | HE21 | GLN | A | 55 | 6850    | 5720    | 6530   | 880  | 1040  | 470  | H0 |
| ATOM   | 895 | HE22 | GLN | A | 55 | -29.462 | -26.949 | 19.217 | 1.00 | 48.85 | H0   |    |
| ANISOU | 895 | HE22 | GLN | A | 55 | 6650    | 5620    | 6290   | 720  | 950   | 450  | H0 |
| ATOM   | 896 | N    | THR | A | 56 | -32.713 | -23.782 | 14.739 | 1.00 | 40.82 | N0   |    |
| ANISOU | 896 | N    | THR | A | 56 | 5760    | 4620    | 5130   | 200  | 960   | 40   | N0 |
| ATOM   | 897 | CA   | THR | A | 56 | -33.920 | -23.879 | 13.881 | 1.00 | 40.72 | C0   |    |
| ANISOU | 897 | CA   | THR | A | 56 | 5830    | 4580    | 5070   | 100  | 960   | -30  | C0 |
| ATOM   | 898 | C    | THR | A | 56 | -33.493 | -24.276 | 12.462 | 1.00 | 40.45 | C0   |    |
| ANISOU | 898 | C    | THR | A | 56 | 5850    | 4480    | 5030   | 110  | 1040  | -100 | C0 |
| ATOM   | 899 | O    | THR | A | 56 | -32.835 | -23.458 | 11.790 | 1.00 | 40.47 | O0   |    |
| ANISOU | 899 | O    | THR | A | 56 | 5820    | 4540    | 5020   | 130  | 1050  | -130 | O0 |
| ATOM   | 900 | CB   | THR | A | 56 | -34.704 | -22.560 | 13.919 | 1.00 | 40.13 | C0   |    |
| ANISOU | 900 | CB   | THR | A | 56 | 5710    | 4610    | 4930   | 40   | 890   | -50  | C0 |
| ATOM   | 901 | OG1  | THR | A | 56 | -34.706 | -22.087 | 15.266 | 1.00 | 40.44 | O0   |    |
| ANISOU | 901 | OG1  | THR | A | 56 | 5680    | 4710    | 4970   | 50   | 830   | 10   | O0 |
| ATOM   | 902 | CG2  | THR | A | 56 | -36.130 | -22.707 | 13.439 | 1.00 | 40.36 | C0   |    |
| ANISOU | 902 | CG2  | THR | A | 56 | 5790    | 4640    | 4900   | -50  | 870   | -110 | C0 |
| ATOM   | 903 | H    | THR | A | 56 | -32.106 | -23.188 | 14.410 | 1.00 | 40.94 | H0   |    |
| ANISOU | 903 | H    | THR | A | 56 | 5730    | 4690    | 5140   | 220  | 960   | 20   | H0 |
| ATOM   | 904 | HA   | THR | A | 56 | -34.493 | -24.588 | 14.244 | 1.00 | 40.91 | H0   |    |
| ANISOU | 904 | HA   | THR | A | 56 | 5900    | 4550    | 5100   | 80   | 970   | -20  | H0 |
| ATOM   | 905 | HB   | THR | A | 56 | -34.239 | -21.903 | 13.348 | 1.00 | 40.07 | H0   |    |
| ANISOU | 905 | HB   | THR | A | 56 | 5680    | 4630    | 4910   | 50   | 900   | -70  | H0 |
| ATOM   | 906 | HG21 | THR | A | 56 | -36.133 | -23.001 | 12.511 | 1.00 | 40.60 | H0   |    |
| ANISOU | 906 | HG21 | THR | A | 56 | 5870    | 4640    | 4920   | -70  | 910   | -160 | H0 |
| ATOM   | 907 | HG22 | THR | A | 56 | -36.587 | -21.849 | 13.508 | 1.00 | 39.74 | H0   |    |
| ANISOU | 907 | HG22 | THR | A | 56 | 5680    | 4640    | 4780   | -70  | 830   | -110 | H0 |
| ATOM   | 908 | HG23 | THR | A | 56 | -36.593 | -23.364 | 13.989 | 1.00 | 40.52 | H0   |    |
| ANISOU | 908 | HG23 | THR | A | 56 | 5830    | 4630    | 4930   | -80  | 870   | -90  | H0 |
| ATOM   | 909 | N    | THR | A | 57 | -33.847 | -25.484 | 12.028 | 1.00 | 40.41 | N0   |    |
| ANISOU | 909 | N    | THR | A | 57 | 5950    | 4360    | 5040   | 90   | 1100  | -140 | N0 |
| ATOM   | 910 | CA   | THR | A | 57 | -33.565 | -25.991 | 10.660 | 1.00 | 40.51 | C0   |    |
| ANISOU | 910 | CA   | THR | A | 57 | 6030    | 4310    | 5050   | 80   | 1180  | -220 | C0 |
| ATOM   | 911 | C    | THR | A | 57 | -34.887 | -26.372 | 9.988  | 1.00 | 40.06 | C0   |    |
| ANISOU | 911 | C    | THR | A | 57 | 6060    | 4230    | 4930   | -40  | 1180  | -310 | C0 |
| ATOM   | 912 | O    | THR | A | 57 | -35.811 | -26.839 | 10.684 | 1.00 | 39.08 | O0   |    |
| ANISOU | 912 | O    | THR | A | 57 | 5960    | 4090    | 4800   | -110 | 1160  | -300 | O0 |
| ATOM   | 913 | CB   | THR | A | 57 | -32.588 | -27.172 | 10.659 | 1.00 | 42.03 | C0   |    |
| ANISOU | 913 | CB   | THR | A | 57 | 6280    | 4380    | 5320   | 180  | 1280  | -210 | C0 |
| ATOM   | 914 | OG1  | THR | A | 57 | -33.302 | -28.315 | 11.119 | 1.00 | 43.81 | O0   |    |
| ANISOU | 914 | OG1  | THR | A | 57 | 6600    | 4480    | 5560   | 150  | 1310  | -200 | O0 |

|        |     |               |         |         |        |      |       |      |    |
|--------|-----|---------------|---------|---------|--------|------|-------|------|----|
| ATOM   | 915 | CG2 THR A 57  | -31.361 | -26.959 | 11.518 | 1.00 | 42.48 | C0   |    |
| ANISOU | 915 | CG2 THR A 57  | 6230    | 4470    | 5430   | 320  | 1270  | -120 | C0 |
| ATOM   | 916 | H THR A 57    | -34.289 | -26.092 | 12.542 | 1.00 | 40.75 | H0   |    |
| ANISOU | 916 | H THR A 57    | 6030    | 4360    | 5100   | 70   | 1100  | -120 | H0 |
| ATOM   | 917 | HA THR A 57   | -33.160 | -25.258 | 10.148 | 1.00 | 40.23 | H0   |    |
| ANISOU | 917 | HA THR A 57   | 5960    | 4330    | 4990   | 90   | 1180  | -240 | H0 |
| ATOM   | 918 | HB THR A 57   | -32.299 | -27.331 | 9.729  | 1.00 | 42.66 | H0   |    |
| ANISOU | 918 | HB THR A 57   | 6390    | 4430    | 5390   | 180  | 1330  | -270 | H0 |
| ATOM   | 919 | HG21 THR A 57 | -30.944 | -26.109 | 11.285 | 1.00 | 41.88 | H0   |    |
| ANISOU | 919 | HG21 THR A 57 | 6090    | 4490    | 5340   | 320  | 1240  | -120 | H0 |
| ATOM   | 920 | HG22 THR A 57 | -30.727 | -27.682 | 11.365 | 1.00 | 43.26 | H0   |    |
| ANISOU | 920 | HG22 THR A 57 | 6360    | 4500    | 5570   | 390  | 1330  | -110 | H0 |
| ATOM   | 921 | HG23 THR A 57 | -31.618 | -26.947 | 12.457 | 1.00 | 42.14 | H0   |    |
| ANISOU | 921 | HG23 THR A 57 | 6170    | 4450    | 5390   | 320  | 1220  | -60  | H0 |
| ATOM   | 922 | N TRP A 58    | -34.963 | -26.147 | 8.680  | 1.00 | 39.56 | N0   |    |
| ANISOU | 922 | N TRP A 58    | 6030    | 4190    | 4810   | -80  | 1210  | -390 | N0 |
| ATOM   | 923 | CA TRP A 58   | -36.096 | -26.538 | 7.802  | 1.00 | 39.68 | C0   |    |
| ANISOU | 923 | CA TRP A 58   | 6120    | 4220    | 4740   | -210 | 1210  | -490 | C0 |
| ATOM   | 924 | C TRP A 58    | -35.586 | -26.559 | 6.360  | 1.00 | 40.71 | C0   |    |
| ANISOU | 924 | C TRP A 58    | 6300    | 4340    | 4830   | -210 | 1280  | -570 | C0 |
| ATOM   | 925 | O TRP A 58    | -34.431 | -26.159 | 6.134  | 1.00 | 39.64 | O0   |    |
| ANISOU | 925 | O TRP A 58    | 6130    | 4200    | 4730   | -110 | 1310  | -540 | O0 |
| ATOM   | 926 | CB TRP A 58   | -37.282 | -25.579 | 7.974  | 1.00 | 38.03 | C0   |    |
| ANISOU | 926 | CB TRP A 58   | 5840    | 4150    | 4450   | -280 | 1110  | -490 | C0 |
| ATOM   | 927 | CG TRP A 58   | -37.019 | -24.185 | 7.495  | 1.00 | 36.51 | C0   |    |
| ANISOU | 927 | CG TRP A 58   | 5590    | 4070    | 4210   | -230 | 1060  | -470 | C0 |
| ATOM   | 928 | CD1 TRP A 58  | -37.347 | -23.669 | 6.276  | 1.00 | 36.56 | C0   |    |
| ANISOU | 928 | CD1 TRP A 58  | 5620    | 4150    | 4120   | -260 | 1050  | -520 | C0 |
| ATOM   | 929 | CD2 TRP A 58  | -36.369 | -23.122 | 8.218  | 1.00 | 35.38 | C0   |    |
| ANISOU | 929 | CD2 TRP A 58  | 5370    | 3970    | 4100   | -160 | 1020  | -380 | C0 |
| ATOM   | 930 | NE1 TRP A 58  | -36.950 | -22.363 | 6.190  | 1.00 | 35.77 | N0   |    |
| ANISOU | 930 | NE1 TRP A 58  | 5470    | 4120    | 4000   | -210 | 1010  | -470 | N0 |
| ATOM   | 931 | CE2 TRP A 58  | -36.338 | -22.002 | 7.359  | 1.00 | 34.69 | C0   |    |
| ANISOU | 931 | CE2 TRP A 58  | 5280    | 3970    | 3940   | -150 | 1000  | -390 | C0 |
| ATOM   | 932 | CE3 TRP A 58  | -35.808 | -23.004 | 9.496  | 1.00 | 34.87 | C0   |    |
| ANISOU | 932 | CE3 TRP A 58  | 5250    | 3890    | 4110   | -100 | 1000  | -300 | C0 |
| ATOM   | 933 | CZ2 TRP A 58  | -35.775 | -20.786 | 7.739  | 1.00 | 34.03 | C0   |    |
| ANISOU | 933 | CZ2 TRP A 58  | 5140    | 3930    | 3860   | -100 | 980   | -330 | C0 |
| ATOM   | 934 | CZ3 TRP A 58  | -35.255 | -21.800 | 9.873  | 1.00 | 34.24 | C0   |    |
| ANISOU | 934 | CZ3 TRP A 58  | 5100    | 3880    | 4030   | -50  | 970   | -250 | C0 |
| ATOM   | 935 | CH2 TRP A 58  | -35.237 | -20.707 | 9.003  | 1.00 | 33.73 | C0   |    |
| ANISOU | 935 | CH2 TRP A 58  | 5040    | 3870    | 3900   | -60  | 960   | -270 | C0 |
| ATOM   | 936 | H TRP A 58    | -34.300 | -25.720 | 8.224  | 1.00 | 39.56 | H0   |    |
| ANISOU | 936 | H TRP A 58    | 6010    | 4220    | 4810   | -40  | 1230  | -390 | H0 |
| ATOM   | 937 | HA TRP A 58   | -36.388 | -27.445 | 8.056  | 1.00 | 40.30 | H0   |    |
| ANISOU | 937 | HA TRP A 58   | 6250    | 4210    | 4850   | -240 | 1250  | -500 | H0 |
| ATOM   | 938 | HB2 TRP A 58  | -38.047 | -25.945 | 7.485  | 1.00 | 38.52 | H0   |    |
| ANISOU | 938 | HB2 TRP A 58  | 5940    | 4230    | 4460   | -360 | 1110  | -550 | H0 |
| ATOM   | 939 | HB3 TRP A 58  | -37.520 | -25.551 | 8.923  | 1.00 | 37.70 | H0   |    |
| ANISOU | 939 | HB3 TRP A 58  | 5770    | 4110    | 4440   | -270 | 1070  | -440 | H0 |
| ATOM   | 940 | HD1 TRP A 58  | -37.784 | -24.142 | 5.584  | 1.00 | 37.17 | H0   |    |
| ANISOU | 940 | HD1 TRP A 58  | 5740    | 4230    | 4150   | -320 | 1070  | -590 | H0 |
| ATOM   | 941 | HE1 TRP A 58  | -37.055 | -21.851 | 5.492  | 1.00 | 35.80 | H0   |    |
| ANISOU | 941 | HE1 TRP A 58  | 5490    | 4170    | 3940   | -210 | 1010  | -490 | H0 |



|        |     |     |     |   |    |         |         |        |      |       |       |    |
|--------|-----|-----|-----|---|----|---------|---------|--------|------|-------|-------|----|
| ATOM   | 942 | HE3 | TRP | A | 58 | -35.811 | -23.738 | 10.089 | 1.00 | 35.17 | H0    |    |
| ANISOU | 942 | HE3 | TRP | A | 58 | 5300    | 3870    | 4190   | -90  | 1020  | -280  | H0 |
| ATOM   | 943 | HZ2 | TRP | A | 58 | -35.771 | -20.048 | 7.156  | 1.00 | 34.06 | H0    |    |
| ANISOU | 943 | HZ2 | TRP | A | 58 | 5160    | 3970    | 3810   | -90  | 970   | -340  | H0 |
| ATOM   | 944 | HZ3 | TRP | A | 58 | -34.870 | -21.714 | 10.731 | 1.00 | 33.95 | H0    |    |
| ANISOU | 944 | HZ3 | TRP | A | 58 | 5020    | 3840    | 4040   | -20  | 960   | -200  | H0 |
| ATOM   | 945 | HH2 | TRP | A | 58 | -34.851 | -19.897 | 9.288  | 1.00 | 33.43 | H0    |    |
| ANISOU | 945 | HH2 | TRP | A | 58 | 4970    | 3870    | 3870   | -40  | 950   | -240  | H0 |
| ATOM   | 946 | N   | SER | A | 59 | -36.425 | -26.997 | 5.427  | 1.00 | 42.48 | N0    |    |
| ANISOU | 946 | N   | SER | A | 59 | 6590    | 4580    | 4980   | -310 | 1290  | -670  | N0 |
| ATOM   | 947 | CA  | SER | A | 59 | -36.071 | -27.147 | 3.996  | 1.00 | 44.08 | C0    |    |
| ANISOU | 947 | CA  | SER | A | 59 | 6850    | 4770    | 5120   | -330 | 1360  | -760  | C0 |
| ATOM   | 948 | C   | SER | A | 59 | -36.994 | -26.265 | 3.153  | 1.00 | 43.89 | C0    |    |
| ANISOU | 948 | C   | SER | A | 59 | 6800    | 4910    | 4960   | -400 | 1280  | -800  | C0 |
| ATOM   | 949 | O   | SER | A | 59 | -38.184 | -26.141 | 3.493  | 1.00 | 43.76 | O0    |    |
| ANISOU | 949 | O   | SER | A | 59 | 6750    | 4980    | 4890   | -480 | 1200  | -810  | O0 |
| ATOM   | 950 | CB  | SER | A | 59 | -36.136 | -28.589 | 3.589  | 1.00 | 46.18 | C0    |    |
| ANISOU | 950 | CB  | SER | A | 59 | 7240    | 4900    | 5410   | -390 | 1460  | -850  | C0 |
| ATOM   | 951 | OG  | SER | A | 59 | -35.557 | -28.775 | 2.311  | 1.00 | 49.29 | O0    |    |
| ANISOU | 951 | OG  | SER | A | 59 | 7690    | 5270    | 5760   | -390 | 1550  | -940  | O0 |
| ATOM   | 952 | H   | SER | A | 59 | -37.286 | -27.239 | 5.600  | 1.00 | 42.54 | H0    |    |
| ANISOU | 952 | H   | SER | A | 59 | 6600    | 4600    | 4960   | -390 | 1270  | -690  | H0 |
| ATOM   | 953 | HA  | SER | A | 59 | -35.137 | -26.827 | 3.871  | 1.00 | 43.90 | H0    |    |
| ANISOU | 953 | HA  | SER | A | 59 | 6810    | 4740    | 5130   | -250 | 1390  | -730  | H0 |
| ATOM   | 954 | HB2 | SER | A | 59 | -35.654 | -29.136 | 4.249  | 1.00 | 46.77 | H0    |    |
| ANISOU | 954 | HB2 | SER | A | 59 | 7330    | 4870    | 5570   | -330 | 1510  | -810  | H0 |
| ATOM   | 955 | HB3 | SER | A | 59 | -37.074 | -28.883 | 3.572  | 1.00 | 46.83 | H0    |    |
| ANISOU | 955 | HB3 | SER | A | 59 | 7340    | 5010    | 5450   | -490 | 1440  | -900  | H0 |
| ATOM   | 956 | N   | ASP | A | 60 | -36.440 | -25.648 | 2.112  | 1.00 | 44.07 | N0    |    |
| ANISOU | 956 | N   | ASP | A | 60 | 6840    | 4990    | 4930   | -370 | 1300  | -820  | N0 |
| ATOM   | 957 | CA  | ASP | A | 60 | -37.205 | -24.933 | 1.061  | 1.00 | 44.13 | C0    |    |
| ANISOU | 957 | CA  | ASP | A | 60 | 6850    | 5140    | 4780   | -420 | 1250  | -870  | C0 |
| ATOM   | 958 | C   | ASP | A | 60 | -36.546 | -25.290 | -0.275 | 1.00 | 45.08 | C0    |    |
| ANISOU | 958 | C   | ASP | A | 60 | 7050    | 5230    | 4850   | -440 | 1340  | -950  | C0 |
| ATOM   | 959 | O   | ASP | A | 60 | -35.549 | -24.649 | -0.633 | 1.00 | 45.25 | O0    |    |
| ANISOU | 959 | O   | ASP | A | 60 | 7060    | 5250    | 4880   | -360 | 1380  | -910  | O0 |
| ATOM   | 960 | CB  | ASP | A | 60 | -37.262 | -23.438 | 1.382  | 1.00 | 43.46 | C0    |    |
| ANISOU | 960 | CB  | ASP | A | 60 | 6690    | 5160    | 4670   | -360 | 1160  | -770  | C0 |
| ATOM   | 961 | CG  | ASP | A | 60 | -38.081 | -22.605 | 0.414  | 1.00 | 44.05 | C0    |    |
| ANISOU | 961 | CG  | ASP | A | 60 | 6770    | 5390    | 4580   | -380 | 1090  | -790  | C0 |
| ATOM   | 962 | OD1 | ASP | A | 60 | -38.653 | -23.178 | -0.537 | 1.00 | 45.08 | O0    |    |
| ANISOU | 962 | OD1 | ASP | A | 60 | 6940    | 5570    | 4620   | -460 | 1100  | -880  | O0 |
| ATOM   | 963 | OD2 | ASP | A | 60 | -38.131 | -21.381 | 0.620  | 1.00 | 44.64 | O0    |    |
| ANISOU | 963 | OD2 | ASP | A | 60 | 6800    | 5530    | 4630   | -310 | 1040  | -700  | O0 |
| ATOM   | 964 | H   | ASP | A | 60 | -35.538 | -25.623 | 1.984  | 1.00 | 44.07 | H0    |    |
| ANISOU | 964 | H   | ASP | A | 60 | 6840    | 4940    | 4970   | -310 | 1360  | -810  | H0 |
| ATOM   | 965 | HA  | ASP | A | 60 | -38.127 | -25.282 | 1.058  | 1.00 | 44.56 | H0    |    |
| ANISOU | 965 | HA  | ASP | A | 60 | 6900    | 5240    | 4790   | -500 | 1210  | -910  | H0 |
| ATOM   | 966 | HB2 | ASP | A | 60 | -37.642 | -23.324 | 2.277  | 1.00 | 42.87 | H0    |    |
| ANISOU | 966 | HB2 | ASP | A | 60 | 6560    | 5090    | 4630   | -350 | 1110  | -720  | H0 |
| ATOM   | 967 | HB3 | ASP | A | 60 | -36.350 | -23.083 | 1.393  | 1.00 | 43.17 | H0    |    |
| ANISOU | 967 | HB3 | ASP | A | 60 | 6650    | 5080    | 4670   | -300 | 1200  | -730  | H0 |
| ATOM   | 968 | N   | ARG | A | 61 | -37.075 | -26.306 | -0.959 | 1.00 | 46.06 | N0    |    |
| ANISOU | 968 | N   | ARG | A | 61 | 7240    | 5330    | 4920   | -540 | 1390  | -1070 | N0 |

|        |     |      |     |   |    |         |         |        |      |       |       |    |
|--------|-----|------|-----|---|----|---------|---------|--------|------|-------|-------|----|
| ATOM   | 969 | CA   | ARG | A | 61 | -36.447 | -26.919 | -2.159 | 1.00 | 47.62 | C0    |    |
| ANISOU | 969 | CA   | ARG | A | 61 | 7540    | 5480    | 5080   | -560 | 1500  | -1170 | C0 |
| ATOM   | 970 | C    | ARG | A | 61 | -36.536 | -25.964 | -3.361 | 1.00 | 46.99 | C0    |    |
| ANISOU | 970 | C    | ARG | A | 61 | 7460    | 5550    | 4840   | -560 | 1470  | -1180 | C0 |
| ATOM   | 971 | O    | ARG | A | 61 | -35.876 | -26.253 | -4.368 | 1.00 | 47.61 | O0    |    |
| ANISOU | 971 | O    | ARG | A | 61 | 7610    | 5600    | 4880   | -570 | 1560  | -1250 | O0 |
| ATOM   | 972 | CB   | ARG | A | 61 | -37.089 | -28.277 | -2.459 | 1.00 | 49.67 | C0    |    |
| ANISOU | 972 | CB   | ARG | A | 61 | 7880    | 5670    | 5320   | -690 | 1560  | -1310 | C0 |
| ATOM   | 973 | CG   | ARG | A | 61 | -36.813 | -29.350 | -1.412 | 1.00 | 50.48 | C0    |    |
| ANISOU | 973 | CG   | ARG | A | 61 | 8020    | 5580    | 5570   | -670 | 1630  | -1290 | C0 |
| ATOM   | 974 | CD   | ARG | A | 61 | -35.391 | -29.876 | -1.482 | 1.00 | 51.61 | C0    |    |
| ANISOU | 974 | CD   | ARG | A | 61 | 8220    | 5560    | 5820   | -560 | 1760  | -1280 | C0 |
| ATOM   | 975 | NE   | ARG | A | 61 | -35.158 | -30.725 | -2.648 | 1.00 | 53.90 | N0    |    |
| ANISOU | 975 | NE   | ARG | A | 61 | 8630    | 5780    | 6060   | -620 | 1880  | -1420 | N0 |
| ATOM   | 976 | CZ   | ARG | A | 61 | -33.961 | -31.041 | -3.149 | 1.00 | 54.87 | C0    |    |
| ANISOU | 976 | CZ   | ARG | A | 61 | 8800    | 5810    | 6240   | -520 | 2000  | -1440 | C0 |
| ATOM   | 977 | NH1  | ARG | A | 61 | -32.852 | -30.579 | -2.596 | 1.00 | 54.00 | N0    |    |
| ANISOU | 977 | NH1  | ARG | A | 61 | 8610    | 5680    | 6230   | -370 | 2010  | -1330 | N0 |
| ATOM   | 978 | NH2  | ARG | A | 61 | -33.880 | -31.826 | -4.212 | 1.00 | 56.80 | N0    |    |
| ANISOU | 978 | NH2  | ARG | A | 61 | 9160    | 6000    | 6420   | -590 | 2110  | -1580 | N0 |
| ATOM   | 979 | H    | ARG | A | 61 | -37.867 | -26.690 | -0.725 | 1.00 | 46.42 | H0    |    |
| ANISOU | 979 | H    | ARG | A | 61 | 7290    | 5400    | 4950   | -610 | 1350  | -1100 | H0 |
| ATOM   | 980 | HA   | ARG | A | 61 | -35.495 | -27.065 | -1.958 | 1.00 | 47.44 | H0    |    |
| ANISOU | 980 | HA   | ARG | A | 61 | 7520    | 5360    | 5140   | -490 | 1570  | -1140 | H0 |
| ATOM   | 981 | HB2  | ARG | A | 61 | -38.058 | -28.154 | -2.535 | 1.00 | 49.75 | H0    |    |
| ANISOU | 981 | HB2  | ARG | A | 61 | 7870    | 5780    | 5250   | -770 | 1480  | -1330 | H0 |
| ATOM   | 982 | HB3  | ARG | A | 61 | -36.759 | -28.592 | -3.326 | 1.00 | 50.50 | H0    |    |
| ANISOU | 982 | HB3  | ARG | A | 61 | 8050    | 5760    | 5380   | -710 | 1620  | -1380 | H0 |
| ATOM   | 983 | HG2  | ARG | A | 61 | -36.971 | -28.978 | -0.518 | 1.00 | 49.58 | H0    |    |
| ANISOU | 983 | HG2  | ARG | A | 61 | 7850    | 5480    | 5510   | -630 | 1560  | -1210 | H0 |
| ATOM   | 984 | HG3  | ARG | A | 61 | -37.436 | -30.097 | -1.542 | 1.00 | 51.34 | H0    |    |
| ANISOU | 984 | HG3  | ARG | A | 61 | 8190    | 5660    | 5660   | -770 | 1650  | -1370 | H0 |
| ATOM   | 985 | HD2  | ARG | A | 61 | -34.774 | -29.117 | -1.509 | 1.00 | 50.91 | H0    |    |
| ANISOU | 985 | HD2  | ARG | A | 61 | 8080    | 5520    | 5740   | -470 | 1740  | -1220 | H0 |
| ATOM   | 986 | HD3  | ARG | A | 61 | -35.199 | -30.390 | -0.668 | 1.00 | 51.58 | H0    |    |
| ANISOU | 986 | HD3  | ARG | A | 61 | 8230    | 5450    | 5920   | -520 | 1780  | -1240 | H0 |
| ATOM   | 987 | HE   | ARG | A | 61 | -35.858 | -31.056 | -3.049 | 1.00 | 54.46 | H0    |    |
| ANISOU | 987 | HE   | ARG | A | 61 | 8740    | 5880    | 6070   | -720 | 1870  | -1500 | H0 |
| ATOM   | 988 | HH11 | ARG | A | 61 | -32.893 | -30.063 | -1.890 | 1.00 | 53.06 | H0    |    |
| ANISOU | 988 | HH11 | ARG | A | 61 | 8420    | 5600    | 6140   | -330 | 1940  | -1250 | H0 |
| ATOM   | 989 | HH12 | ARG | A | 61 | -32.070 | -30.796 | -2.936 | 1.00 | 54.58 | H0    |    |
| ANISOU | 989 | HH12 | ARG | A | 61 | 8710    | 5700    | 6330   | -310 | 2090  | -1350 | H0 |
| ATOM   | 990 | HH21 | ARG | A | 61 | -34.614 | -32.136 | -4.588 | 1.00 | 57.23 | H0    |    |
| ANISOU | 990 | HH21 | ARG | A | 61 | 9260    | 6080    | 6410   | -700 | 2100  | -1660 | H0 |
| ATOM   | 991 | HH22 | ARG | A | 61 | -33.091 | -32.034 | -4.546 | 1.00 | 57.15 | H0    |    |
| ANISOU | 991 | HH22 | ARG | A | 61 | 9230    | 5980    | 6500   | -520 | 2190  | -1600 | H0 |
| ATOM   | 992 | N    | THR | A | 62 | -37.295 | -24.866 | -3.258 | 1.00 | 45.66 | N0    |    |
| ANISOU | 992 | N    | THR | A | 62 | 7230    | 5530    | 4590   | -550 | 1350  | -1120 | N0 |
| ATOM   | 993 | CA   | THR | A | 62 | -37.367 | -23.799 | -4.296 | 1.00 | 45.41 | C0    |    |
| ANISOU | 993 | CA   | THR | A | 62 | 7210    | 5640    | 4410   | -530 | 1310  | -1090 | C0 |
| ATOM   | 994 | C    | THR | A | 62 | -36.036 | -23.035 | -4.331 | 1.00 | 44.17 | C0    |    |
| ANISOU | 994 | C    | THR | A | 62 | 7060    | 5420    | 4310   | -430 | 1370  | -1010 | C0 |
| ATOM   | 995 | O    | THR | A | 62 | -35.746 | -22.440 | -5.378 | 1.00 | 44.65 | O0    |    |
| ANISOU | 995 | O    | THR | A | 62 | 7170    | 5540    | 4260   | -420 | 1400  | -1010 | O0 |

|        |      |      |     |   |    |         |         |        |      |       |       |    |
|--------|------|------|-----|---|----|---------|---------|--------|------|-------|-------|----|
| ATOM   | 996  | CB   | THR | A | 62 | -38.545 | -22.832 | -4.082 | 1.00 | 44.81 | C0    |    |
| ANISOU | 996  | CB   | THR | A | 62 | 7070    | 5730    | 4230   | -510 | 1170  | -1030 | C0 |
| ATOM   | 997  | OG1  | THR | A | 62 | -38.311 | -22.049 | -2.915 | 1.00 | 42.97 | O0    |    |
| ANISOU | 997  | OG1  | THR | A | 62 | 6770    | 5450    | 4110   | -430 | 1120  | -910  | O0 |
| ATOM   | 998  | CG2  | THR | A | 62 | -39.886 | -23.519 | -3.951 | 1.00 | 45.63 | C0    |    |
| ANISOU | 998  | CG2  | THR | A | 62 | 7130    | 5920    | 4280   | -620 | 1100  | -1120 | C0 |
| ATOM   | 999  | H    | THR | A | 62 | -37.829 | -24.692 | -2.544 | 1.00 | 45.14 | H0    |    |
| ANISOU | 999  | H    | THR | A | 62 | 7110    | 5490    | 4550   | -550 | 1280  | -1080 | H0 |
| ATOM   | 1000 | HA   | THR | A | 62 | -37.489 | -24.242 | -5.167 | 1.00 | 46.33 | H0    |    |
| ANISOU | 1000 | HA   | THR | A | 62 | 7380    | 5780    | 4440   | -580 | 1340  | -1180 | H0 |
| ATOM   | 1001 | HB   | THR | A | 62 | -38.583 | -22.227 | -4.861 | 1.00 | 45.18 | H0    |    |
| ANISOU | 1001 | HB   | THR | A | 62 | 7140    | 5860    | 4170   | -490 | 1150  | -1020 | H0 |
| ATOM   | 1002 | HG21 | THR | A | 62 | -40.032 | -24.097 | -4.721 | 1.00 | 46.57 | H0    |    |
| ANISOU | 1002 | HG21 | THR | A | 62 | 7300    | 6070    | 4330   | -690 | 1130  | -1210 | H0 |
| ATOM   | 1003 | HG22 | THR | A | 62 | -40.592 | -22.850 | -3.912 | 1.00 | 45.43 | H0    |    |
| ANISOU | 1003 | HG22 | THR | A | 62 | 7060    | 6020    | 4180   | -600 | 1010  | -1080 | H0 |
| ATOM   | 1004 | HG23 | THR | A | 62 | -39.902 | -24.054 | -3.138 | 1.00 | 45.19 | H0    |    |
| ANISOU | 1004 | HG23 | THR | A | 62 | 7060    | 5780    | 4330   | -640 | 1110  | -1120 | H0 |
| ATOM   | 1005 | N    | LEU | A | 63 | -35.263 | -23.063 | -3.237 | 1.00 | 42.83 | N0    |    |
| ANISOU | 1005 | N    | LEU | A | 63 | 6840    | 5140    | 4300   | -360 | 1400  | -940  | N0 |
| ATOM   | 1006 | CA   | LEU | A | 63 | -33.993 | -22.302 | -3.076 | 1.00 | 42.42 | C0    |    |
| ANISOU | 1006 | CA   | LEU | A | 63 | 6760    | 5040    | 4310   | -280 | 1460  | -870  | C0 |
| ATOM   | 1007 | C    | LEU | A | 63 | -32.816 | -23.097 | -3.651 | 1.00 | 42.33 | C0    |    |
| ANISOU | 1007 | C    | LEU | A | 63 | 6790    | 4940    | 4350   | -270 | 1600  | -930  | C0 |
| ATOM   | 1008 | O    | LEU | A | 63 | -31.736 | -22.509 | -3.779 | 1.00 | 41.76 | O0    |    |
| ANISOU | 1008 | O    | LEU | A | 63 | 6700    | 4860    | 4310   | -220 | 1660  | -890  | O0 |
| ATOM   | 1009 | CB   | LEU | A | 63 | -33.740 | -22.017 | -1.589 | 1.00 | 42.25 | C0    |    |
| ANISOU | 1009 | CB   | LEU | A | 63 | 6650    | 4970    | 4430   | -230 | 1420  | -780  | C0 |
| ATOM   | 1010 | CG   | LEU | A | 63 | -34.378 | -20.755 | -1.012 | 1.00 | 42.22 | C0    |    |
| ANISOU | 1010 | CG   | LEU | A | 63 | 6600    | 5050    | 4390   | -200 | 1310  | -680  | C0 |
| ATOM   | 1011 | CD1  | LEU | A | 63 | -35.823 | -20.606 | -1.459 | 1.00 | 43.13 | C0    |    |
| ANISOU | 1011 | CD1  | LEU | A | 63 | 6740    | 5280    | 4370   | -250 | 1220  | -710  | C0 |
| ATOM   | 1012 | CD2  | LEU | A | 63 | -34.284 | -20.753 | 0.509  | 1.00 | 41.03 | C0    |    |
| ANISOU | 1012 | CD2  | LEU | A | 63 | 6370    | 4850    | 4370   | -170 | 1270  | -620  | C0 |
| ATOM   | 1013 | H    | LEU | A | 63 | -35.480 | -23.555 | -2.504 | 1.00 | 42.69 | H0    |    |
| ANISOU | 1013 | H    | LEU | A | 63 | 6790    | 5070    | 4360   | -370 | 1390  | -940  | H0 |
| ATOM   | 1014 | HA   | LEU | A | 63 | -34.072 | -21.451 | -3.566 | 1.00 | 42.41 | H0    |    |
| ANISOU | 1014 | HA   | LEU | A | 63 | 6780    | 5110    | 4230   | -280 | 1440  | -830  | H0 |
| ATOM   | 1015 | HB2  | LEU | A | 63 | -34.056 | -22.783 | -1.072 | 1.00 | 42.22 | H0    |    |
| ANISOU | 1015 | HB2  | LEU | A | 63 | 6640    | 4920    | 4480   | -240 | 1410  | -800  | H0 |
| ATOM   | 1016 | HB3  | LEU | A | 63 | -32.773 | -21.956 | -1.452 | 1.00 | 42.18 | H0    |    |
| ANISOU | 1016 | HB3  | LEU | A | 63 | 6620    | 4920    | 4490   | -190 | 1480  | -760  | H0 |
| ATOM   | 1017 | HG   | LEU | A | 63 | -33.873 | -19.975 | -1.350 | 1.00 | 42.11 | H0    |    |
| ANISOU | 1017 | HG   | LEU | A | 63 | 6600    | 5060    | 4350   | -180 | 1340  | -650  | H0 |
| ATOM   | 1018 | HD11 | LEU | A | 63 | -35.848 | -20.310 | -2.385 | 1.00 | 43.52 | H0    |    |
| ANISOU | 1018 | HD11 | LEU | A | 63 | 6840    | 5380    | 4320   | -260 | 1230  | -730  | H0 |
| ATOM   | 1019 | HD12 | LEU | A | 63 | -36.272 | -19.950 | -0.898 | 1.00 | 42.34 | H0    |    |
| ANISOU | 1019 | HD12 | LEU | A | 63 | 6600    | 5220    | 4270   | -220 | 1150  | -650  | H0 |
| ATOM   | 1020 | HD13 | LEU | A | 63 | -36.276 | -21.462 | -1.380 | 1.00 | 43.23 | H0    |    |
| ANISOU | 1020 | HD13 | LEU | A | 63 | 6750    | 5280    | 4400   | -290 | 1210  | -760  | H0 |
| ATOM   | 1021 | HD21 | LEU | A | 63 | -34.731 | -21.541 | 0.863  | 1.00 | 41.18 | H0    |    |
| ANISOU | 1021 | HD21 | LEU | A | 63 | 6380    | 4850    | 4420   | -190 | 1260  | -650  | H0 |
| ATOM   | 1022 | HD22 | LEU | A | 63 | -34.711 | -19.952 | 0.861  | 1.00 | 40.58 | H0    |    |
| ANISOU | 1022 | HD22 | LEU | A | 63 | 6290    | 4850    | 4290   | -160 | 1210  | -570  | H0 |

|                           |         |         |        |      |       |       |    |
|---------------------------|---------|---------|--------|------|-------|-------|----|
| ATOM 1023 HD23 LEU A 63   | -33.349 | -20.764 | 0.777  | 1.00 | 41.02 | H0    |    |
| ANISOU 1023 HD23 LEU A 63 | 6340    | 4810    | 4440   | -140 | 1320  | -600  | H0 |
| ATOM 1024 N ALA A 64      | -32.998 | -24.388 | -3.938 | 1.00 | 42.85 | N0    |    |
| ANISOU 1024 N ALA A 64    | 6910    | 4940    | 4430   | -320 | 1660  | -1040 | N0 |
| ATOM 1025 CA ALA A 64     | -31.894 | -25.331 | -4.230 | 1.00 | 43.65 | C0    |    |
| ANISOU 1025 CA ALA A 64   | 7050    | 4920    | 4620   | -280 | 1800  | -1100 | C0 |
| ATOM 1026 C ALA A 64      | -31.170 | -24.897 | -5.511 | 1.00 | 44.27 | C0    |    |
| ANISOU 1026 C ALA A 64    | 7170    | 5050    | 4600   | -280 | 1880  | -1140 | C0 |
| ATOM 1027 O ALA A 64      | -31.820 | -24.281 | -6.386 | 1.00 | 44.37 | O0    |    |
| ANISOU 1027 O ALA A 64    | 7230    | 5180    | 4460   | -340 | 1840  | -1160 | O0 |
| ATOM 1028 CB ALA A 64     | -32.421 | -26.743 | -4.322 | 1.00 | 44.78 | C0    |    |
| ANISOU 1028 CB ALA A 64   | 7270    | 4970    | 4780   | -340 | 1840  | -1210 | C0 |
| ATOM 1029 H ALA A 64      | -33.815 | -24.786 | -3.977 | 1.00 | 43.14 | H0    |    |
| ANISOU 1029 H ALA A 64    | 6970    | 4990    | 4430   | -370 | 1620  | -1080 | H0 |
| ATOM 1030 HA ALA A 64     | -31.252 | -25.285 | -3.484 | 1.00 | 43.20 | H0    |    |
| ANISOU 1030 HA ALA A 64   | 6930    | 4820    | 4660   | -210 | 1810  | -1040 | H0 |
| ATOM 1031 HB1 ALA A 64    | -31.702 | -27.342 | -4.583 | 1.00 | 45.46 | H0    |    |
| ANISOU 1031 HB1 ALA A 64  | 7390    | 4980    | 4910   | -310 | 1940  | -1250 | H0 |
| ATOM 1032 HB2 ALA A 64    | -32.772 | -27.016 | -3.458 | 1.00 | 44.28 | H0    |    |
| ANISOU 1032 HB2 ALA A 64  | 7180    | 4870    | 4780   | -340 | 1800  | -1170 | H0 |
| ATOM 1033 HB3 ALA A 64    | -33.130 | -26.783 | -4.985 | 1.00 | 45.20 | H0    |    |
| ANISOU 1033 HB3 ALA A 64  | 7360    | 5090    | 4720   | -420 | 1820  | -1270 | H0 |
| ATOM 1034 N TRP A 65      | -29.865 | -25.169 | -5.595 | 1.00 | 44.49 | N0    |    |
| ANISOU 1034 N TRP A 65    | 7180    | 5010    | 4710   | -210 | 2000  | -1150 | N0 |
| ATOM 1035 CA TRP A 65     | -29.035 | -24.891 | -6.800 | 1.00 | 45.65 | C0    |    |
| ANISOU 1035 CA TRP A 65   | 7370    | 5200    | 4780   | -220 | 2110  | -1200 | C0 |
| ATOM 1036 C TRP A 65      | -27.999 | -26.004 | -7.002 | 1.00 | 47.27 | C0    |    |
| ANISOU 1036 C TRP A 65    | 7590    | 5300    | 5080   | -160 | 2260  | -1280 | C0 |
| ATOM 1037 O TRP A 65      | -27.827 | -26.838 | -6.090 | 1.00 | 47.26 | O0    |    |
| ANISOU 1037 O TRP A 65    | 7560    | 5190    | 5220   | -90  | 2270  | -1270 | O0 |
| ATOM 1038 CB TRP A 65     | -28.374 | -23.510 | -6.706 | 1.00 | 44.49 | C0    |    |
| ANISOU 1038 CB TRP A 65   | 7150    | 5130    | 4620   | -190 | 2100  | -1100 | C0 |
| ATOM 1039 CG TRP A 65     | -27.260 | -23.420 | -5.708 | 1.00 | 43.76 | C0    |    |
| ANISOU 1039 CG TRP A 65   | 6940    | 5000    | 4690   | -100 | 2140  | -1040 | C0 |
| ATOM 1040 CD1 TRP A 65    | -25.933 | -23.636 | -5.940 | 1.00 | 44.56 | C0    |    |
| ANISOU 1040 CD1 TRP A 65  | 7000    | 5080    | 4850   | -50  | 2270  | -1070 | C0 |
| ATOM 1041 CD2 TRP A 65    | -27.371 | -23.076 | -4.316 | 1.00 | 42.14 | C0    |    |
| ANISOU 1041 CD2 TRP A 65  | 6640    | 4780    | 4580   | -60  | 2040  | -940  | C0 |
| ATOM 1042 NE1 TRP A 65    | -25.214 | -23.455 | -4.789 | 1.00 | 43.79 | N0    |    |
| ANISOU 1042 NE1 TRP A 65  | 6770    | 4980    | 4880   | 30   | 2250  | -1000 | N0 |
| ATOM 1043 CE2 TRP A 65    | -26.069 | -23.113 | -3.776 | 1.00 | 42.40 | C0    |    |
| ANISOU 1043 CE2 TRP A 65  | 6570    | 4810    | 4730   | 20   | 2120  | -920  | C0 |
| ATOM 1044 CE3 TRP A 65    | -28.439 | -22.751 | -3.474 | 1.00 | 41.30 | C0    |    |
| ANISOU 1044 CE3 TRP A 65  | 6520    | 4690    | 4480   | -80  | 1910  | -880  | C0 |
| ATOM 1045 CZ2 TRP A 65    | -25.810 | -22.831 | -2.434 | 1.00 | 41.80 | C0    |    |
| ANISOU 1045 CZ2 TRP A 65  | 6380    | 4740    | 4770   | 70   | 2050  | -830  | C0 |
| ATOM 1046 CZ3 TRP A 65    | -28.184 | -22.468 | -2.147 | 1.00 | 40.51 | C0    |    |
| ANISOU 1046 CZ3 TRP A 65  | 6320    | 4580    | 4490   | -30  | 1850  | -800  | C0 |
| ATOM 1047 CH2 TRP A 65    | -26.885 | -22.510 | -1.637 | 1.00 | 40.70 | C0    |    |
| ANISOU 1047 CH2 TRP A 65  | 6240    | 4600    | 4620   | 40   | 1920  | -770  | C0 |
| ATOM 1048 H TRP A 65      | -29.393 | -25.543 | -4.911 | 1.00 | 44.46 | H0    |    |
| ANISOU 1048 H TRP A 65    | 7130    | 4940    | 4820   | -160 | 2030  | -1130 | H0 |
| ATOM 1049 HA TRP A 65     | -29.636 | -24.881 | -7.582 | 1.00 | 46.09 | H0    |    |
| ANISOU 1049 HA TRP A 65   | 7490    | 5300    | 4720   | -280 | 2100  | -1250 | H0 |

|                          |         |         |         |      |       |       |    |
|--------------------------|---------|---------|---------|------|-------|-------|----|
| ATOM 1050 HB2 TRP A 65   | -28.028 | -23.275 | -7.591  | 1.00 | 45.23 | H0    |    |
| ANISOU 1050 HB2 TRP A 65 | 7290    | 5260    | 4640    | -210 | 2170  | -1130 | H0 |
| ATOM 1051 HB3 TRP A 65   | -29.063 | -22.855 | -6.472  | 1.00 | 43.83 | H0    |    |
| ANISOU 1051 HB3 TRP A 65 | 7070    | 5100    | 4490    | -210 | 2010  | -1040 | H0 |
| ATOM 1052 HD1 TRP A 65   | -25.558 | -23.876 | -6.771  | 1.00 | 45.44 | H0    |    |
| ANISOU 1052 HD1 TRP A 65 | 7150    | 5200    | 4920    | -60  | 2350  | -1130 | H0 |
| ATOM 1053 HE1 TRP A 65   | -24.349 | -23.546 | -4.718  | 1.00 | 44.30 | H0    |    |
| ANISOU 1053 HE1 TRP A 65 | 6770    | 5050    | 5000    | 70   | 2320  | -1000 | H0 |
| ATOM 1054 HE3 TRP A 65   | -29.318 | -22.718 | -3.811  | 1.00 | 41.22 | H0    |    |
| ANISOU 1054 HE3 TRP A 65 | 6570    | 4700    | 4390    | -130 | 1860  | -900  | H0 |
| ATOM 1055 HZ2 TRP A 65   | -24.934 | -22.859 | -2.090  | 1.00 | 42.03 | H0    |    |
| ANISOU 1055 HZ2 TRP A 65 | 6330    | 4780    | 4860    | 120  | 2100  | -820  | H0 |
| ATOM 1056 HZ3 TRP A 65   | -28.899 | -22.246 | -1.574  | 1.00 | 39.75 | H0    |    |
| ANISOU 1056 HZ3 TRP A 65 | 6220    | 4500    | 4390    | -40  | 1770  | -760  | H0 |
| ATOM 1057 HH2 TRP A 65   | -26.741 | -22.316 | -0.728  | 1.00 | 40.15 | H0    |    |
| ANISOU 1057 HH2 TRP A 65 | 6100    | 4540    | 4620    | 70   | 1880  | -720  | H0 |
| ATOM 1058 N ASN A 66     | -27.338 | -25.988 | -8.161  | 1.00 | 48.47 | N0    |    |
| ANISOU 1058 N ASN A 66   | 7780    | 5480    | 5150    | -170 | 2380  | -1350 | N0 |
| ATOM 1059 CA ASN A 66    | -26.281 | -26.950 | -8.561  | 1.00 | 50.65 | C0    |    |
| ANISOU 1059 CA ASN A 66  | 8080    | 5670    | 5500    | -110 | 2540  | -1440 | C0 |
| ATOM 1060 C ASN A 66     | -24.942 | -26.485 | -7.979  | 1.00 | 50.72 | C0    |    |
| ANISOU 1060 C ASN A 66   | 7950    | 5690    | 5630    | 0    | 2590  | -1370 | C0 |
| ATOM 1061 O ASN A 66     | -24.444 | -25.429 | -8.417  | 1.00 | 50.00 | O0    |    |
| ANISOU 1061 O ASN A 66   | 7820    | 5710    | 5470    | -30  | 2610  | -1330 | O0 |
| ATOM 1062 CB ASN A 66    | -26.217 | -27.080 | -10.087 | 1.00 | 52.18 | C0    |    |
| ANISOU 1062 CB ASN A 66  | 8380    | 5900    | 5550    | -180 | 2640  | -1560 | C0 |
| ATOM 1063 CG ASN A 66    | -25.285 | -28.173 | -10.552 | 1.00 | 53.83 | C0    |    |
| ANISOU 1063 CG ASN A 66  | 8620    | 6010    | 5820    | -120 | 2810  | -1670 | C0 |
| ATOM 1064 OD1 ASN A 66   | -24.500 | -28.698 | -9.765  | 1.00 | 53.85 | O0    |    |
| ANISOU 1064 OD1 ASN A 66 | 8550    | 5930    | 5980    | 10   | 2870  | -1640 | O0 |
| ATOM 1065 ND2 ASN A 66   | -25.373 | -28.513 | -11.828 | 1.00 | 55.53 | N0    |    |
| ANISOU 1065 ND2 ASN A 66 | 8950    | 6250    | 5900    | -190 | 2900  | -1790 | N0 |
| ATOM 1066 H ASN A 66     | -27.504 | -25.359 | -8.799  | 1.00 | 48.70 | H0    |    |
| ANISOU 1066 H ASN A 66   | 7840    | 5580    | 5080    | -220 | 2360  | -1350 | H0 |
| ATOM 1067 HA ASN A 66    | -26.504 | -27.836 | -8.189  | 1.00 | 50.87 | H0    |    |
| ANISOU 1067 HA ASN A 66  | 8130    | 5600    | 5600    | -90  | 2550  | -1480 | H0 |
| ATOM 1068 HB2 ASN A 66   | -27.117 | -27.263 | -10.426 | 1.00 | 52.27 | H0    |    |
| ANISOU 1068 HB2 ASN A 66 | 8460    | 5930    | 5470    | -260 | 2590  | -1600 | H0 |
| ATOM 1069 HB3 ASN A 66   | -25.921 | -26.226 | -10.465 | 1.00 | 52.00 | H0    |    |
| ANISOU 1069 HB3 ASN A 66 | 8330    | 5970    | 5460    | -190 | 2640  | -1520 | H0 |
| ATOM 1070 N SER A 67     | -24.377 | -27.256 | -7.045  | 1.00 | 51.96 | N0    |    |
| ANISOU 1070 N SER A 67   | 8040    | 5760    | 5940    | 120  | 2630  | -1350 | N0 |
| ATOM 1071 CA SER A 67    | -23.157 | -26.900 | -6.275  | 1.00 | 53.31 | C0    |    |
| ANISOU 1071 CA SER A 67  | 8050    | 5970    | 6230    | 230  | 2650  | -1270 | C0 |
| ATOM 1072 C SER A 67     | -21.924 | -27.663 | -6.778  | 1.00 | 55.88 | C0    |    |
| ANISOU 1072 C SER A 67   | 8350    | 6260    | 6620    | 330  | 2830  | -1350 | C0 |
| ATOM 1073 O SER A 67     | -20.858 | -27.499 | -6.154  | 1.00 | 56.51 | O0    |    |
| ANISOU 1073 O SER A 67   | 8280    | 6390    | 6800    | 440  | 2860  | -1300 | O0 |
| ATOM 1074 CB SER A 67    | -23.366 | -27.129 | -4.801  | 1.00 | 52.73 | C0    |    |
| ANISOU 1074 CB SER A 67  | 7910    | 5850    | 6280    | 300  | 2550  | -1180 | C0 |
| ATOM 1075 OG SER A 67    | -23.552 | -28.507 | -4.516  | 1.00 | 54.17 | O0    |    |
| ANISOU 1075 OG SER A 67  | 8160    | 5880    | 6540    | 370  | 2600  | -1220 | O0 |
| ATOM 1076 H SER A 67     | -24.706 | -28.072 | -6.808  | 1.00 | 52.34 | H0    |    |
| ANISOU 1076 H SER A 67   | 8140    | 5720    | 6030    | 130  | 2630  | -1380 | H0 |

|                          |         |         |         |      |       |       |    |
|--------------------------|---------|---------|---------|------|-------|-------|----|
| ATOM 1077 HA SER A 67    | -22.987 | -25.930 | -6.411  | 1.00 | 52.75 | H0    |    |
| ANISOU 1077 HA SER A 67  | 7940    | 5990    | 6110    | 180  | 2630  | -1230 | H0 |
| ATOM 1078 HB2 SER A 67   | -22.585 | -26.796 | -4.307  | 1.00 | 52.73 | H0    |    |
| ANISOU 1078 HB2 SER A 67 | 7790    | 5900    | 6340    | 370  | 2560  | -1130 | H0 |
| ATOM 1079 HB3 SER A 67   | -24.153 | -26.624 | -4.503  | 1.00 | 51.73 | H0    |    |
| ANISOU 1079 HB3 SER A 67 | 7790    | 5750    | 6110    | 240  | 2450  | -1130 | H0 |
| ATOM 1080 N SER A 68     | -22.044 | -28.452 | -7.854  | 1.00 | 58.42 | N0    |    |
| ANISOU 1080 N SER A 68   | 8810    | 6520    | 6880    | 310  | 2930  | -1480 | N0 |
| ATOM 1081 CA SER A 68    | -20.938 | -29.285 | -8.400  | 1.00 | 61.13 | C0    |    |
| ANISOU 1081 CA SER A 68  | 9140    | 6810    | 7270    | 420  | 3110  | -1570 | C0 |
| ATOM 1082 C SER A 68     | -19.732 | -28.390 | -8.715  | 1.00 | 62.08 | C0    |    |
| ANISOU 1082 C SER A 68   | 9120    | 7080    | 7380    | 440  | 3180  | -1550 | C0 |
| ATOM 1083 O SER A 68     | -18.613 | -28.773 | -8.329  | 1.00 | 63.17 | O0    |    |
| ANISOU 1083 O SER A 68   | 9140    | 7230    | 7630    | 580  | 3270  | -1550 | O0 |
| ATOM 1084 CB SER A 68    | -21.372 | -30.088 | -9.605  | 1.00 | 62.55 | C0    |    |
| ANISOU 1084 CB SER A 68  | 9500    | 6910    | 7360    | 350  | 3210  | -1710 | C0 |
| ATOM 1085 OG SER A 68    | -21.568 | -29.250 | -10.732 | 1.00 | 62.78 | O0    |    |
| ANISOU 1085 OG SER A 68  | 9570    | 7060    | 7220    | 210  | 3220  | -1750 | O0 |
| ATOM 1086 H SER A 68     | -22.812 | -28.534 | -8.336  | 1.00 | 58.26 | H0    |    |
| ANISOU 1086 H SER A 68   | 8890    | 6480    | 6770    | 220  | 2910  | -1520 | H0 |
| ATOM 1087 HA SER A 68    | -20.664 | -29.924 | -7.688  | 1.00 | 61.38 | H0    |    |
| ANISOU 1087 HA SER A 68  | 9140    | 6770    | 7410    | 530  | 3120  | -1540 | H0 |
| ATOM 1088 HB2 SER A 68   | -20.685 | -30.761 | -9.813  | 1.00 | 63.86 | H0    |    |
| ANISOU 1088 HB2 SER A 68 | 9670    | 7020    | 7580    | 440  | 3330  | -1770 | H0 |
| ATOM 1089 HB3 SER A 68   | -22.211 | -30.560 | -9.398  | 1.00 | 62.33 | H0    |    |
| ANISOU 1089 HB3 SER A 68 | 9560    | 6800    | 7320    | 310  | 3160  | -1730 | H0 |
| ATOM 1090 N HIS A 69     | -19.962 | -27.239 | -9.359  | 1.00 | 62.44 | N0    |    |
| ANISOU 1090 N HIS A 69   | 9180    | 7240    | 7300    | 300  | 3150  | -1530 | N0 |
| ATOM 1091 CA HIS A 69    | -18.928 | -26.223 | -9.704  | 1.00 | 64.02 | C0    |    |
| ANISOU 1091 CA HIS A 69  | 9270    | 7590    | 7470    | 270  | 3220  | -1510 | C0 |
| ATOM 1092 C HIS A 69     | -19.323 | -24.849 | -9.149  | 1.00 | 62.22 | C0    |    |
| ANISOU 1092 C HIS A 69   | 8990    | 7450    | 7200    | 180  | 3090  | -1400 | C0 |
| ATOM 1093 O HIS A 69     | -18.967 | -23.827 | -9.776  | 1.00 | 62.91 | O0    |    |
| ANISOU 1093 O HIS A 69   | 9070    | 7640    | 7190    | 90   | 3130  | -1390 | O0 |
| ATOM 1094 CB HIS A 69    | -18.697 | -26.187 | -11.220 | 1.00 | 66.71 | C0    |    |
| ANISOU 1094 CB HIS A 69  | 9710    | 7970    | 7670    | 200  | 3360  | -1620 | C0 |
| ATOM 1095 CG HIS A 69    | -18.029 | -27.410 | -11.746 | 1.00 | 69.68 | C0    |    |
| ANISOU 1095 CG HIS A 69  | 10110   | 8270    | 8090    | 300  | 3520  | -1740 | C0 |
| ATOM 1096 ND1 HIS A 69   | -18.713 | -28.374 | -12.463 | 1.00 | 71.74 | N0    |    |
| ANISOU 1096 ND1 HIS A 69 | 10540   | 8420    | 8290    | 270  | 3560  | -1850 | N0 |
| ATOM 1097 CD2 HIS A 69   | -16.749 | -27.835 | -11.658 | 1.00 | 72.27 | C0    |    |
| ANISOU 1097 CD2 HIS A 69 | 10310   | 8630    | 8520    | 430  | 3650  | -1780 | C0 |
| ATOM 1098 CE1 HIS A 69   | -17.880 | -29.339 | -12.804 | 1.00 | 74.00 | C0    |    |
| ANISOU 1098 CE1 HIS A 69 | 10820   | 8650    | 8640    | 390  | 3720  | -1950 | C0 |
| ATOM 1099 NE2 HIS A 69   | -16.667 | -29.033 | -12.321 | 1.00 | 74.46 | N0    |    |
| ANISOU 1099 NE2 HIS A 69 | 10690   | 8800    | 8800    | 490  | 3780  | -1900 | N0 |
| ATOM 1100 H HIS A 69     | -20.792 | -26.992 | -9.644  | 1.00 | 61.93 | H0    |    |
| ANISOU 1100 H HIS A 69   | 9200    | 7180    | 7150    | 210  | 3090  | -1530 | H0 |
| ATOM 1101 HA HIS A 69    | -18.084 | -26.491 | -9.271  | 1.00 | 64.55 | H0    |    |
| ANISOU 1101 HA HIS A 69  | 9220    | 7670    | 7630    | 370  | 3270  | -1510 | H0 |
| ATOM 1102 HB2 HIS A 69   | -19.563 | -26.078 | -11.672 | 1.00 | 66.28 | H0    |    |
| ANISOU 1102 HB2 HIS A 69 | 9770    | 7900    | 7510    | 110  | 3300  | -1630 | H0 |
| ATOM 1103 HB3 HIS A 69   | -18.143 | -25.405 | -11.442 | 1.00 | 66.76 | H0    |    |
| ANISOU 1103 HB3 HIS A 69 | 9660    | 8070    | 7640    | 160  | 3390  | -1600 | H0 |

|                          |         |         |         |      |       |       |    |
|--------------------------|---------|---------|---------|------|-------|-------|----|
| ATOM 1104 HD2 HIS A 69   | -16.042 | -27.391 | -11.229 | 1.00 | 72.08 | H0    |    |
| ANISOU 1104 HD2 HIS A 69 | 10140   | 8690    | 8550    | 470  | 3660  | -1730 | H0 |
| ATOM 1105 HE1 HIS A 69   | -18.102 | -30.111 | -13.297 | 1.00 | 74.76 | H0    |    |
| ANISOU 1105 HE1 HIS A 69 | 11030   | 8660    | 8720    | 390  | 3790  | -2040 | H0 |
| ATOM 1106 N SER A 70     | -20.017 | -24.833 | -8.008  | 1.00 | 60.11 | N0    |    |
| ANISOU 1106 N SER A 70   | 8700    | 7140    | 7000    | 210  | 2940  | -1310 | N0 |
| ATOM 1107 CA SER A 70    | -20.443 | -23.614 | -7.272  | 1.00 | 57.93 | C0    |    |
| ANISOU 1107 CA SER A 70  | 8380    | 6930    | 6710    | 140  | 2810  | -1200 | C0 |
| ATOM 1108 C SER A 70     | -20.331 | -23.875 | -5.773  | 1.00 | 55.72 | C0    |    |
| ANISOU 1108 C SER A 70   | 7970    | 6620    | 6580    | 230  | 2720  | -1120 | C0 |
| ATOM 1109 O SER A 70     | -20.285 | -25.028 | -5.351  | 1.00 | 55.48 | O0    |    |
| ANISOU 1109 O SER A 70   | 7940    | 6510    | 6640    | 340  | 2730  | -1150 | O0 |
| ATOM 1110 CB SER A 70    | -21.840 | -23.209 | -7.661  | 1.00 | 57.56 | C0    |    |
| ANISOU 1110 CB SER A 70  | 8480    | 6860    | 6540    | 30   | 2700  | -1180 | C0 |
| ATOM 1111 OG SER A 70    | -21.936 | -23.044 | -9.067  | 1.00 | 59.76 | O0    |    |
| ANISOU 1111 OG SER A 70  | 8870    | 7170    | 6660    | -40  | 2780  | -1250 | O0 |
| ATOM 1112 H SER A 70     | -20.279 | -25.592 | -7.583  | 1.00 | 60.11 | H0    |    |
| ANISOU 1112 H SER A 70   | 8710    | 7060    | 7060    | 270  | 2920  | -1320 | H0 |
| ATOM 1113 HA SER A 70    | -19.820 | -22.878 | -7.511  | 1.00 | 58.13 | H0    |    |
| ANISOU 1113 HA SER A 70  | 8350    | 7030    | 6710    | 100  | 2860  | -1190 | H0 |
| ATOM 1114 HB2 SER A 70   | -22.475 | -23.899 | -7.366  | 1.00 | 57.44 | H0    |    |
| ANISOU 1114 HB2 SER A 70 | 8500    | 6770    | 6550    | 60   | 2650  | -1190 | H0 |
| ATOM 1115 HB3 SER A 70   | -22.074 | -22.365 | -7.214  | 1.00 | 56.82 | H0    |    |
| ANISOU 1115 HB3 SER A 70 | 8360    | 6800    | 6430    | 0    | 2630  | -1110 | H0 |
| ATOM 1116 N PRO A 71     | -20.256 | -22.821 | -4.929  | 1.00 | 53.99 | N0    |    |
| ANISOU 1116 N PRO A 71   | 7660    | 6480    | 6380    | 200  | 2630  | -1030 | N0 |
| ATOM 1117 CA PRO A 71    | -20.258 | -22.996 | -3.473  | 1.00 | 52.56 | C0    |    |
| ANISOU 1117 CA PRO A 71  | 7360    | 6290    | 6310    | 280  | 2530  | -960  | C0 |
| ATOM 1118 C PRO A 71     | -21.452 | -23.830 | -2.980  | 1.00 | 51.01 | C0    |    |
| ANISOU 1118 C PRO A 71   | 7270    | 5980    | 6140    | 310  | 2430  | -940  | C0 |
| ATOM 1119 O PRO A 71     | -22.543 | -23.611 | -3.452  | 1.00 | 49.62 | O0    |    |
| ANISOU 1119 O PRO A 71   | 7220    | 5770    | 5870    | 220  | 2380  | -950  | O0 |
| ATOM 1120 CB PRO A 71    | -20.335 | -21.552 | -2.953  | 1.00 | 51.70 | C0    |    |
| ANISOU 1120 CB PRO A 71  | 7200    | 6270    | 6170    | 180  | 2450  | -880  | C0 |
| ATOM 1121 CG PRO A 71    | -19.683 | -20.735 | -4.049  | 1.00 | 52.66 | C0    |    |
| ANISOU 1121 CG PRO A 71  | 7340    | 6460    | 6200    | 90   | 2570  | -920  | C0 |
| ATOM 1122 CD PRO A 71    | -20.133 | -21.409 | -5.327  | 1.00 | 53.63 | C0    |    |
| ANISOU 1122 CD PRO A 71  | 7620    | 6520    | 6240    | 80   | 2640  | -1000 | C0 |
| ATOM 1123 HA PRO A 71    | -19.405 | -23.409 | -3.187  | 1.00 | 53.33 | H0    |    |
| ANISOU 1123 HA PRO A 71  | 7360    | 6420    | 6490    | 360  | 2580  | -970  | H0 |
| ATOM 1124 HB2 PRO A 71   | -21.267 | -21.275 | -2.817  | 1.00 | 50.77 | H0    |    |
| ANISOU 1124 HB2 PRO A 71 | 7160    | 6120    | 6010    | 130  | 2370  | -850  | H0 |
| ATOM 1125 HB3 PRO A 71   | -19.848 | -21.456 | -2.107  | 1.00 | 51.59 | H0    |    |
| ANISOU 1125 HB3 PRO A 71 | 7070    | 6300    | 6230    | 220  | 2430  | -850  | H0 |
| ATOM 1126 HG2 PRO A 71   | -19.986 | -19.804 | -4.019  | 1.00 | 52.10 | H0    |    |
| ANISOU 1126 HG2 PRO A 71 | 7300    | 6420    | 6080    | 10   | 2530  | -880  | H0 |
| ATOM 1127 HG3 PRO A 71   | -18.708 | -20.755 | -3.968  | 1.00 | 53.48 | H0    |    |
| ANISOU 1127 HG3 PRO A 71 | 7330    | 6630    | 6350    | 120  | 2640  | -940  | H0 |
| ATOM 1128 HD2 PRO A 71   | -20.988 | -21.053 | -5.632  | 1.00 | 53.00 | H0    |    |
| ANISOU 1128 HD2 PRO A 71 | 7640    | 6420    | 6080    | 10   | 2580  | -980  | H0 |
| ATOM 1129 HD3 PRO A 71   | -19.470 | -21.297 | -6.033  | 1.00 | 54.53 | H0    |    |
| ANISOU 1129 HD3 PRO A 71 | 7720    | 6680    | 6320    | 60   | 2740  | -1050 | H0 |
| ATOM 1130 N ASP A 72     | -21.207 | -24.767 | -2.059  | 1.00 | 51.57 | N0    |    |
| ANISOU 1130 N ASP A 72   | 7280    | 5990    | 6330    | 430  | 2420  | -920  | N0 |

|                           |         |         |        |      |       |       |    |
|---------------------------|---------|---------|--------|------|-------|-------|----|
| ATOM 1131 CA ASP A 72     | -22.221 | -25.702 | -1.495 | 1.00 | 51.52 | C0    |    |
| ANISOU 1131 CA ASP A 72   | 7360    | 5860    | 6360   | 460  | 2350  | -900  | C0 |
| ATOM 1132 C ASP A 72      | -23.194 | -24.951 | -0.583 | 1.00 | 49.30 | C0    |    |
| ANISOU 1132 C ASP A 72    | 7070    | 5600    | 6060   | 390  | 2190  | -810  | C0 |
| ATOM 1133 O ASP A 72      | -24.352 | -25.409 | -0.453 | 1.00 | 48.78 | O0    |    |
| ANISOU 1133 O ASP A 72    | 7110    | 5450    | 5970   | 350  | 2130  | -810  | O0 |
| ATOM 1134 CB ASP A 72     | -21.569 | -26.810 | -0.670 | 1.00 | 53.14 | C0    |    |
| ANISOU 1134 CB ASP A 72   | 7500    | 6000    | 6690   | 630  | 2380  | -870  | C0 |
| ATOM 1135 CG ASP A 72     | -20.626 | -27.684 | -1.468 | 1.00 | 56.21 | C0    |    |
| ANISOU 1135 CG ASP A 72   | 7900    | 6350    | 7110   | 730  | 2540  | -960  | C0 |
| ATOM 1136 OD1 ASP A 72    | -21.116 | -28.450 | -2.323 | 1.00 | 57.98 | O0    |    |
| ANISOU 1136 OD1 ASP A 72  | 8280    | 6450    | 7290   | 700  | 2610  | -1040 | O0 |
| ATOM 1137 OD2 ASP A 72    | -19.410 | -27.582 | -1.230 | 1.00 | 58.89 | O0    |    |
| ANISOU 1137 OD2 ASP A 72  | 8090    | 6780    | 7510   | 840  | 2600  | -940  | O0 |
| ATOM 1138 H ASP A 72      | -20.376 | -24.885 | -1.704 | 1.00 | 52.15 | H0    |    |
| ANISOU 1138 H ASP A 72    | 7240    | 6110    | 6460   | 510  | 2460  | -900  | H0 |
| ATOM 1139 HA ASP A 72     | -22.725 | -26.108 | -2.236 | 1.00 | 51.79 | H0    |    |
| ANISOU 1139 HA ASP A 72   | 7510    | 5830    | 6340   | 420  | 2380  | -960  | H0 |
| ATOM 1140 HB2 ASP A 72    | -21.068 | -26.407 | 0.068  | 1.00 | 53.02 | H0    |    |
| ANISOU 1140 HB2 ASP A 72  | 7370    | 6060    | 6720   | 670  | 2350  | -820  | H0 |
| ATOM 1141 HB3 ASP A 72    | -22.269 | -27.380 | -0.290 | 1.00 | 53.01 | H0    |    |
| ANISOU 1141 HB3 ASP A 72  | 7560    | 5890    | 6690   | 640  | 2340  | -860  | H0 |
| ATOM 1142 N GLN A 73      | -22.720 | -23.882 | 0.065  | 1.00 | 47.87 | N0    |    |
| ANISOU 1142 N GLN A 73    | 6770    | 5530    | 5890   | 380  | 2140  | -750  | N0 |
| ATOM 1143 CA GLN A 73     | -23.481 | -23.120 | 1.090  | 1.00 | 46.30 | C0    |    |
| ANISOU 1143 CA GLN A 73   | 6540    | 5360    | 5690   | 330  | 2010  | -660  | C0 |
| ATOM 1144 C GLN A 73      | -23.179 | -21.622 | 0.976  | 1.00 | 44.95 | C0    |    |
| ANISOU 1144 C GLN A 73    | 6320    | 5300    | 5460   | 230  | 1990  | -640  | C0 |
| ATOM 1145 O GLN A 73      | -22.080 | -21.259 | 0.508  | 1.00 | 45.15 | O0    |    |
| ANISOU 1145 O GLN A 73    | 6280    | 5400    | 5480   | 230  | 2090  | -670  | O0 |
| ATOM 1146 CB GLN A 73     | -23.108 | -23.564 | 2.505  | 1.00 | 46.76 | C0    |    |
| ANISOU 1146 CB GLN A 73   | 6490    | 5430    | 5850   | 430  | 1950  | -600  | C0 |
| ATOM 1147 CG GLN A 73     | -23.128 | -25.069 | 2.716  | 1.00 | 48.20 | C0    |    |
| ANISOU 1147 CG GLN A 73   | 6720    | 5490    | 6100   | 550  | 1990  | -610  | C0 |
| ATOM 1148 CD GLN A 73     | -23.006 | -25.436 | 4.174  | 1.00 | 48.43 | C0    |    |
| ANISOU 1148 CD GLN A 73   | 6660    | 5520    | 6220   | 640  | 1920  | -520  | C0 |
| ATOM 1149 OE1 GLN A 73    | -22.951 | -24.577 | 5.056  | 1.00 | 48.66 | O0    |    |
| ANISOU 1149 OE1 GLN A 73  | 6590    | 5650    | 6250   | 610  | 1830  | -450  | O0 |
| ATOM 1150 NE2 GLN A 73    | -22.965 | -26.730 | 4.440  | 1.00 | 49.85 | N0    |    |
| ANISOU 1150 NE2 GLN A 73  | 6890    | 5590    | 6460   | 760  | 1960  | -510  | N0 |
| ATOM 1151 H GLN A 73      | -21.882 | -23.556 | -0.079 | 1.00 | 48.51 | H0    |    |
| ANISOU 1151 H GLN A 73    | 6770    | 5680    | 5980   | 390  | 2200  | -760  | H0 |
| ATOM 1152 HA GLN A 73     | -24.442 | -23.267 | 0.946  | 1.00 | 45.78 | H0    |    |
| ANISOU 1152 HA GLN A 73   | 6570    | 5250    | 5580   | 280  | 1960  | -670  | H0 |
| ATOM 1153 HB2 GLN A 73    | -22.211 | -23.229 | 2.706  | 1.00 | 47.16 | H0    |    |
| ANISOU 1153 HB2 GLN A 73  | 6430    | 5560    | 5930   | 460  | 1980  | -590  | H0 |
| ATOM 1154 HB3 GLN A 73    | -23.731 | -23.144 | 3.133  | 1.00 | 45.86 | H0    |    |
| ANISOU 1154 HB3 GLN A 73  | 6370    | 5320    | 5730   | 390  | 1860  | -550  | H0 |
| ATOM 1155 HG2 GLN A 73    | -23.967 | -25.434 | 2.362  | 1.00 | 47.96 | H0    |    |
| ANISOU 1155 HG2 GLN A 73  | 6800    | 5380    | 6040   | 500  | 1980  | -630  | H0 |
| ATOM 1156 HG3 GLN A 73    | -22.387 | -25.476 | 2.219  | 1.00 | 49.17 | H0    |    |
| ANISOU 1156 HG3 GLN A 73  | 6820    | 5610    | 6250   | 600  | 2080  | -650  | H0 |
| ATOM 1157 HE21 GLN A 73   | -22.808 | -27.007 | 5.265  | 1.00 | 49.82 | H0    |    |
| ANISOU 1157 HE21 GLN A 73 | 6840    | 5580    | 6500   | 830  | 1920  | -450  | H0 |



|                           |         |         |        |      |       |      |    |
|---------------------------|---------|---------|--------|------|-------|------|----|
| ATOM 1158 HE22 GLN A 73   | -23.093 | -27.320 | 3.794  | 1.00 | 50.28 | H0   |    |
| ANISOU 1158 HE22 GLN A 73 | 7040    | 5560    | 6510   | 760  | 2020  | -560 | H0 |
| ATOM 1159 N VAL A 74      | -24.120 | -20.793 | 1.429  | 1.00 | 43.04 | N0   |    |
| ANISOU 1159 N VAL A 74    | 6120    | 5070    | 5170   | 160  | 1890  | -590 | N0 |
| ATOM 1160 CA VAL A 74     | -23.922 | -19.330 | 1.625  | 1.00 | 42.53 | C0   |    |
| ANISOU 1160 CA VAL A 74   | 6010    | 5080    | 5060   | 80   | 1870  | -550 | C0 |
| ATOM 1161 C VAL A 74      | -24.575 | -18.913 | 2.944  | 1.00 | 40.75 | C0   |    |
| ANISOU 1161 C VAL A 74    | 5750    | 4860    | 4870   | 80   | 1740  | -480 | C0 |
| ATOM 1162 O VAL A 74      | -25.577 | -19.537 | 3.356  | 1.00 | 39.40 | O0   |    |
| ANISOU 1162 O VAL A 74    | 5630    | 4630    | 4710   | 100  | 1670  | -460 | O0 |
| ATOM 1163 CB VAL A 74     | -24.470 | -18.517 | 0.437  | 1.00 | 42.77 | C0   |    |
| ANISOU 1163 CB VAL A 74   | 6180    | 5100    | 4970   | -10  | 1890  | -570 | C0 |
| ATOM 1164 CG1 VAL A 74    | -23.577 | -18.650 | -0.787 | 1.00 | 44.05 | C0   |    |
| ANISOU 1164 CG1 VAL A 74  | 6360    | 5290    | 5090   | -20  | 2030  | -630 | C0 |
| ATOM 1165 CG2 VAL A 74    | -25.905 | -18.893 | 0.098  | 1.00 | 42.40 | C0   |    |
| ANISOU 1165 CG2 VAL A 74  | 6260    | 5000    | 4850   | -20  | 1820  | -570 | C0 |
| ATOM 1166 H VAL A 74      | -24.957 | -21.079 | 1.650  | 1.00 | 42.71 | H0   |    |
| ANISOU 1166 H VAL A 74    | 6130    | 4980    | 5120   | 160  | 1830  | -580 | H0 |
| ATOM 1167 HA VAL A 74     | -22.966 | -19.162 | 1.694  | 1.00 | 43.04 | H0   |    |
| ANISOU 1167 HA VAL A 74   | 5990    | 5200    | 5160   | 90   | 1920  | -560 | H0 |
| ATOM 1168 HB VAL A 74     | -24.467 | -17.565 | 0.707  | 1.00 | 42.41 | H0   |    |
| ANISOU 1168 HB VAL A 74   | 6120    | 5090    | 4900   | -50  | 1870  | -530 | H0 |
| ATOM 1169 HG11 VAL A 74   | -22.671 | -18.377 | -0.560 | 1.00 | 44.45 | H0   |    |
| ANISOU 1169 HG11 VAL A 74 | 6320    | 5390    | 5180   | -20  | 2080  | -640 | H0 |
| ATOM 1170 HG12 VAL A 74   | -23.916 | -18.082 | -1.501 | 1.00 | 44.08 | H0   |    |
| ANISOU 1170 HG12 VAL A 74 | 6450    | 5290    | 5010   | -80  | 2040  | -630 | H0 |
| ATOM 1171 HG13 VAL A 74   | -23.570 | -19.576 | -1.086 | 1.00 | 44.47 | H0   |    |
| ANISOU 1171 HG13 VAL A 74 | 6430    | 5300    | 5160   | 30   | 2060  | -670 | H0 |
| ATOM 1172 HG21 VAL A 74   | -25.925 | -19.785 | -0.291 | 1.00 | 42.82 | H0   |    |
| ANISOU 1172 HG21 VAL A 74 | 6340    | 5020    | 4920   | 10   | 1850  | -610 | H0 |
| ATOM 1173 HG22 VAL A 74   | -26.265 | -18.254 | -0.541 | 1.00 | 42.36 | H0   |    |
| ANISOU 1173 HG22 VAL A 74 | 6320    | 5010    | 4760   | -60  | 1820  | -570 | H0 |
| ATOM 1174 HG23 VAL A 74   | -26.446 | -18.880 | 0.906  | 1.00 | 41.64 | H0   |    |
| ANISOU 1174 HG23 VAL A 74 | 6140    | 4900    | 4790   | 0    | 1740  | -530 | H0 |
| ATOM 1175 N SER A 75      | -24.005 | -17.896 | 3.583  | 1.00 | 40.49 | N0   |    |
| ANISOU 1175 N SER A 75    | 5630    | 4900    | 4850   | 40   | 1730  | -450 | N0 |
| ATOM 1176 CA SER A 75     | -24.658 | -17.127 | 4.669  | 1.00 | 39.40 | C0   |    |
| ANISOU 1176 CA SER A 75   | 5480    | 4780    | 4710   | 0    | 1630  | -390 | C0 |
| ATOM 1177 C SER A 75      | -25.541 | -16.060 | 4.020  | 1.00 | 39.12 | C0   |    |
| ANISOU 1177 C SER A 75    | 5580    | 4710    | 4570   | -80  | 1610  | -380 | C0 |
| ATOM 1178 O SER A 75      | -25.055 | -15.382 | 3.081  | 1.00 | 40.21 | O0   |    |
| ANISOU 1178 O SER A 75    | 5760    | 4860    | 4650   | -130 | 1700  | -400 | O0 |
| ATOM 1179 CB SER A 75     | -23.651 | -16.541 | 5.607  | 1.00 | 39.29 | C0   |    |
| ANISOU 1179 CB SER A 75   | 5320    | 4860    | 4750   | -20  | 1630  | -380 | C0 |
| ATOM 1180 OG SER A 75     | -22.912 | -17.577 | 6.227  | 1.00 | 39.86 | O0   |    |
| ANISOU 1180 OG SER A 75   | 5270    | 4980    | 4910   | 80   | 1630  | -380 | O0 |
| ATOM 1181 H SER A 75      | -23.166 | -17.593 | 3.398  | 1.00 | 41.08 | H0   |    |
| ANISOU 1181 H SER A 75    | 5650    | 5030    | 4930   | 20   | 1790  | -470 | H0 |
| ATOM 1182 HA SER A 75     | -25.239 | -17.749 | 5.180  | 1.00 | 38.96 | H0   |    |
| ANISOU 1182 HA SER A 75   | 5430    | 4690    | 4680   | 50   | 1570  | -370 | H0 |
| ATOM 1183 HB2 SER A 75    | -23.042 | -15.950 | 5.110  | 1.00 | 39.90 | H0   |    |
| ANISOU 1183 HB2 SER A 75  | 5390    | 4970    | 4800   | -70  | 1700  | -410 | H0 |
| ATOM 1184 HB3 SER A 75    | -24.111 | -16.006 | 6.293  | 1.00 | 38.76 | H0   |    |
| ANISOU 1184 HB3 SER A 75  | 5250    | 4800    | 4680   | -50  | 1570  | -350 | H0 |

|                           |         |         |       |      |       |      |    |
|---------------------------|---------|---------|-------|------|-------|------|----|
| ATOM 1185 N VAL A 76      | -26.790 | -15.962 | 4.474 | 1.00 | 37.65 | N0   |    |
| ANISOU 1185 N VAL A 76    | 5450    | 4490    | 4360  | -70  | 1510  | -340 | N0 |
| ATOM 1186 CA VAL A 76     | -27.835 | -15.059 | 3.918 | 1.00 | 37.67 | C0   |    |
| ANISOU 1186 CA VAL A 76   | 5580    | 4470    | 4260  | -110 | 1480  | -320 | C0 |
| ATOM 1187 C VAL A 76      | -28.511 | -14.342 | 5.081 | 1.00 | 36.78 | C0   |    |
| ANISOU 1187 C VAL A 76    | 5450    | 4370    | 4170  | -110 | 1390  | -270 | C0 |
| ATOM 1188 O VAL A 76      | -28.839 | -14.983 | 6.076 | 1.00 | 35.27 | O0   |    |
| ANISOU 1188 O VAL A 76    | 5180    | 4180    | 4030  | -80  | 1320  | -260 | O0 |
| ATOM 1189 CB VAL A 76     | -28.854 | -15.863 | 3.090 | 1.00 | 38.06 | C0   |    |
| ANISOU 1189 CB VAL A 76   | 5710    | 4490    | 4250  | -80  | 1450  | -350 | C0 |
| ATOM 1190 CG1 VAL A 76    | -30.042 | -15.018 | 2.659 | 1.00 | 38.23 | C0   |    |
| ANISOU 1190 CG1 VAL A 76  | 5840    | 4520    | 4170  | -90  | 1400  | -310 | C0 |
| ATOM 1191 CG2 VAL A 76    | -28.209 | -16.525 | 1.882 | 1.00 | 39.22 | C0   |    |
| ANISOU 1191 CG2 VAL A 76  | 5900    | 4630    | 4380  | -80  | 1550  | -410 | C0 |
| ATOM 1192 H VAL A 76      | -27.090 | -16.460 | 5.176 | 1.00 | 37.51 | H0   |    |
| ANISOU 1192 H VAL A 76    | 5390    | 4470    | 4390  | -30  | 1460  | -330 | H0 |
| ATOM 1193 HA VAL A 76     | -27.407 | -14.403 | 3.343 | 1.00 | 38.10 | H0   |    |
| ANISOU 1193 HA VAL A 76   | 5670    | 4530    | 4280  | -150 | 1540  | -330 | H0 |
| ATOM 1194 HB VAL A 76     | -29.199 | -16.583 | 3.674 | 1.00 | 37.79 | H0   |    |
| ANISOU 1194 HB VAL A 76   | 5640    | 4450    | 4270  | -50  | 1410  | -350 | H0 |
| ATOM 1195 HG11 VAL A 76   | -30.586 | -14.800 | 3.434 | 1.00 | 37.53 | H0   |    |
| ANISOU 1195 HG11 VAL A 76 | 5730    | 4430    | 4100  | -80  | 1330  | -290 | H0 |
| ATOM 1196 HG12 VAL A 76   | -30.580 | -15.517 | 2.020 | 1.00 | 38.31 | H0   |    |
| ANISOU 1196 HG12 VAL A 76 | 5900    | 4530    | 4130  | -90  | 1380  | -340 | H0 |
| ATOM 1197 HG13 VAL A 76   | -29.726 | -14.199 | 2.243 | 1.00 | 38.41 | H0   |    |
| ANISOU 1197 HG13 VAL A 76 | 5910    | 4540    | 4150  | -120 | 1440  | -300 | H0 |
| ATOM 1198 HG21 VAL A 76   | -27.782 | -15.847 | 1.330 | 1.00 | 39.54 | H0   |    |
| ANISOU 1198 HG21 VAL A 76 | 5970    | 4680    | 4370  | -110 | 1610  | -400 | H0 |
| ATOM 1199 HG22 VAL A 76   | -28.890 | -16.984 | 1.361 | 1.00 | 39.23 | H0   |    |
| ANISOU 1199 HG22 VAL A 76 | 5960    | 4620    | 4330  | -80  | 1530  | -430 | H0 |
| ATOM 1200 HG23 VAL A 76   | -27.542 | -17.167 | 2.180 | 1.00 | 39.39 | H0   |    |
| ANISOU 1200 HG23 VAL A 76 | 5850    | 4650    | 4470  | -50  | 1580  | -420 | H0 |
| ATOM 1201 N PRO A 77      | -28.773 | -13.016 | 4.979 | 1.00 | 36.87 | N0   |    |
| ANISOU 1201 N PRO A 77    | 5530    | 4370    | 4110  | -160 | 1400  | -240 | N0 |
| ATOM 1202 CA PRO A 77     | -29.515 | -12.303 | 6.018 | 1.00 | 36.29 | C0   |    |
| ANISOU 1202 CA PRO A 77   | 5450    | 4290    | 4040  | -150 | 1320  | -200 | C0 |
| ATOM 1203 C PRO A 77      | -30.955 | -12.833 | 6.048 | 1.00 | 36.40 | C0   |    |
| ANISOU 1203 C PRO A 77    | 5500    | 4300    | 4020  | -100 | 1220  | -190 | C0 |
| ATOM 1204 O PRO A 77      | -31.495 | -13.129 | 4.996 | 1.00 | 36.61 | O0   |    |
| ANISOU 1204 O PRO A 77    | 5600    | 4320    | 3980  | -80  | 1230  | -200 | O0 |
| ATOM 1205 CB PRO A 77     | -29.439 | -10.828 | 5.597 | 1.00 | 36.78 | C0   |    |
| ANISOU 1205 CB PRO A 77   | 5620    | 4320    | 4040  | -200 | 1370  | -180 | C0 |
| ATOM 1206 CG PRO A 77     | -29.219 | -10.884 | 4.095 | 1.00 | 37.72 | C0   |    |
| ANISOU 1206 CG PRO A 77   | 5830    | 4420    | 4080  | -210 | 1450  | -190 | C0 |
| ATOM 1207 CD PRO A 77     | -28.408 | -12.140 | 3.855 | 1.00 | 37.51 | C0   |    |
| ANISOU 1207 CD PRO A 77   | 5710    | 4430    | 4110  | -200 | 1480  | -250 | C0 |
| ATOM 1208 HA PRO A 77     | -29.078 | -12.429 | 6.896 | 1.00 | 36.25 | H0   |    |
| ANISOU 1208 HA PRO A 77   | 5360    | 4310    | 4100  | -160 | 1300  | -200 | H0 |
| ATOM 1209 HB2 PRO A 77    | -30.272 | -10.356 | 5.811 | 1.00 | 36.53 | H0   |    |
| ANISOU 1209 HB2 PRO A 77  | 5640    | 4270    | 3970  | -180 | 1320  | -150 | H0 |
| ATOM 1210 HB3 PRO A 77    | -28.693 | -10.373 | 6.042 | 1.00 | 37.02 | H0   |    |
| ANISOU 1210 HB3 PRO A 77  | 5610    | 4360    | 4100  | -250 | 1410  | -190 | H0 |
| ATOM 1211 HG2 PRO A 77    | -30.074 | -10.929 | 3.622 | 1.00 | 37.51 | H0   |    |
| ANISOU 1211 HG2 PRO A 77  | 5880    | 4380    | 3990  | -170 | 1410  | -180 | H0 |

|             |               |         |         |        |      |       |      |    |
|-------------|---------------|---------|---------|--------|------|-------|------|----|
| ATOM 1212   | HG3 PRO A 77  | -28.731 | -10.094 | 3.788  | 1.00 | 38.10 | H0   |    |
| ANISOU 1212 | HG3 PRO A 77  | 5930    | 4450    | 4100   | -250 | 1520  | -190 | H0 |
| ATOM 1213   | HD2 PRO A 77  | -28.643 | -12.547 | 3.001  | 1.00 | 37.91 | H0   |    |
| ANISOU 1213 | HD2 PRO A 77  | 5820    | 4470    | 4120   | -180 | 1500  | -260 | H0 |
| ATOM 1214   | HD3 PRO A 77  | -27.453 | -11.947 | 3.860  | 1.00 | 38.08 | H0   |    |
| ANISOU 1214 | HD3 PRO A 77  | 5740    | 4510    | 4210   | -240 | 1550  | -260 | H0 |
| ATOM 1215   | N ILE A 78    | -31.536 | -12.954 | 7.243  | 1.00 | 35.82 | N0   |    |
| ANISOU 1215 | N ILE A 78    | 5370    | 4240    | 3990   | -80  | 1140  | -170 | N0 |
| ATOM 1216   | CA ILE A 78   | -32.863 | -13.607 | 7.441  | 1.00 | 36.08 | C0   |    |
| ANISOU 1216 | CA ILE A 78   | 5410    | 4290    | 4010   | -50  | 1060  | -160 | C0 |
| ATOM 1217   | C ILE A 78    | -33.977 | -12.765 | 6.801  | 1.00 | 36.61 | C0   |    |
| ANISOU 1217 | C ILE A 78    | 5570    | 4370    | 3970   | -20  | 1020  | -140 | C0 |
| ATOM 1218   | O ILE A 78    | -35.031 | -13.346 | 6.508  | 1.00 | 37.18 | O0   |    |
| ANISOU 1218 | O ILE A 78    | 5650    | 4480    | 4000   | 0    | 960   | -160 | O0 |
| ATOM 1219   | CB ILE A 78   | -33.126 | -13.903 | 8.929  | 1.00 | 35.46 | C0   |    |
| ANISOU 1219 | CB ILE A 78   | 5240    | 4230    | 4000   | -40  | 990   | -150 | C0 |
| ATOM 1220   | CG1 ILE A 78  | -33.106 | -12.638 | 9.795  | 1.00 | 35.49 | C0   |    |
| ANISOU 1220 | CG1 ILE A 78  | 5240    | 4250    | 4000   | -60  | 980   | -120 | C0 |
| ATOM 1221   | CG2 ILE A 78  | -32.145 | -14.957 | 9.416  | 1.00 | 35.54 | C0   |    |
| ANISOU 1221 | CG2 ILE A 78  | 5170    | 4240    | 4100   | -40  | 1020  | -160 | C0 |
| ATOM 1222   | CD1 ILE A 78  | -33.573 | -12.858 | 11.222 | 1.00 | 35.54 | C0   |    |
| ANISOU 1222 | CD1 ILE A 78  | 5170    | 4280    | 4050   | -50  | 910   | -100 | C0 |
| ATOM 1223   | H ILE A 78    | -31.149 | -12.654 | 8.009  | 1.00 | 35.82 | H0   |    |
| ANISOU 1223 | H ILE A 78    | 5320    | 4260    | 4030   | -100 | 1140  | -160 | H0 |
| ATOM 1224   | HA ILE A 78   | -32.839 | -14.461 | 6.974  | 1.00 | 36.21 | H0   |    |
| ANISOU 1224 | HA ILE A 78   | 5420    | 4310    | 4030   | -40  | 1070  | -190 | H0 |
| ATOM 1225   | HB ILE A 78   | -34.034 | -14.289 | 8.995  | 1.00 | 35.32 | H0   |    |
| ANISOU 1225 | HB ILE A 78   | 5230    | 4230    | 3960   | -30  | 940   | -150 | H0 |
| ATOM 1226   | HG12 ILE A 78 | -32.191 | -12.286 | 9.818  | 1.00 | 35.82 | H0   |    |
| ANISOU 1226 | HG12 ILE A 78 | 5260    | 4280    | 4060   | -80  | 1030  | -120 | H0 |
| ATOM 1227   | HG13 ILE A 78 | -33.679 | -11.960 | 9.379  | 1.00 | 35.65 | H0   |    |
| ANISOU 1227 | HG13 ILE A 78 | 5330    | 4260    | 3960   | -40  | 970   | -110 | H0 |
| ATOM 1228   | HG21 ILE A 78 | -32.132 | -15.704 | 8.793  | 1.00 | 35.83 | H0   |    |
| ANISOU 1228 | HG21 ILE A 78 | 5220    | 4260    | 4130   | -20  | 1040  | -180 | H0 |
| ATOM 1229   | HG22 ILE A 78 | -32.418 | -15.275 | 10.294 | 1.00 | 35.26 | H0   |    |
| ANISOU 1229 | HG22 ILE A 78 | 5080    | 4220    | 4090   | -30  | 970   | -140 | H0 |
| ATOM 1230   | HG23 ILE A 78 | -31.254 | -14.571 | 9.476  | 1.00 | 35.79 | H0   |    |
| ANISOU 1230 | HG23 ILE A 78 | 5170    | 4280    | 4150   | -50  | 1060  | -160 | H0 |
| ATOM 1231   | HD11 ILE A 78 | -34.433 | -13.313 | 11.216 | 1.00 | 35.18 | H0   |    |
| ANISOU 1231 | HD11 ILE A 78 | 5130    | 4250    | 3990   | -30  | 870   | -100 | H0 |
| ATOM 1232   | HD12 ILE A 78 | -33.666 | -11.999 | 11.670 | 1.00 | 35.29 | H0   |    |
| ANISOU 1232 | HD12 ILE A 78 | 5150    | 4250    | 4010   | -60  | 900   | -90  | H0 |
| ATOM 1233   | HD13 ILE A 78 | -32.923 | -13.403 | 11.698 | 1.00 | 35.38 | H0   |    |
| ANISOU 1233 | HD13 ILE A 78 | 5080    | 4280    | 4080   | -60  | 920   | -100 | H0 |
| ATOM 1234   | N SER A 79    | -33.745 | -11.473 | 6.549  | 1.00 | 37.44 | N0   |    |
| ANISOU 1234 | N SER A 79    | 5750    | 4450    | 4030   | -20  | 1060  | -110 | N0 |
| ATOM 1235   | CA SER A 79   | -34.698 | -10.561 | 5.860  | 1.00 | 38.43 | C0   |    |
| ANISOU 1235 | CA SER A 79   | 5980    | 4570    | 4050   | 30   | 1040  | -80  | C0 |
| ATOM 1236   | C SER A 79    | -34.869 | -10.946 | 4.382  | 1.00 | 39.36 | C0   |    |
| ANISOU 1236 | C SER A 79    | 6170    | 4710    | 4070   | 40   | 1060  | -90  | C0 |
| ATOM 1237   | O SER A 79    | -35.821 | -10.439 | 3.757  | 1.00 | 41.50 | O0   |    |
| ANISOU 1237 | O SER A 79    | 6510    | 5010    | 4240   | 100  | 1020  | -60  | O0 |
| ATOM 1238   | CB SER A 79   | -34.261 | -9.130  | 5.991  | 1.00 | 39.21 | C0   |    |
| ANISOU 1238 | CB SER A 79   | 6160    | 4610    | 4130   | 20   | 1100  | -40  | C0 |

|                          |         |         |       |      |       |      |    |
|--------------------------|---------|---------|-------|------|-------|------|----|
| ATOM 1239 OG SER A 79    | -32.926 | -8.968  | 5.534 | 1.00 | 40.77 | O0   |    |
| ANISOU 1239 OG SER A 79  | 6380    | 4770    | 4340  | -60  | 1210  | -60  | O0 |
| ATOM 1240 H SER A 79     | -32.982 | -11.045 | 6.799 | 1.00 | 37.55 | H0   |    |
| ANISOU 1240 H SER A 79   | 5750    | 4440    | 4070  | -60  | 1110  | -110 | H0 |
| ATOM 1241 HA SER A 79    | -35.583 | -10.657 | 6.304 | 1.00 | 38.15 | H0   |    |
| ANISOU 1241 HA SER A 79  | 5920    | 4570    | 4000  | 60   | 970   | -70  | H0 |
| ATOM 1242 HB2 SER A 79   | -34.861 | -8.554  | 5.465 | 1.00 | 39.78 | H0   |    |
| ANISOU 1242 HB2 SER A 79 | 6320    | 4680    | 4120  | 60   | 1090  | -10  | H0 |
| ATOM 1243 HB3 SER A 79   | -34.321 | -8.855  | 6.934 | 1.00 | 39.01 | H0   |    |
| ANISOU 1243 HB3 SER A 79 | 6100    | 4580    | 4150  | 10   | 1080  | -40  | H0 |
| ATOM 1244 N SER A 80     | -33.985 | -11.784 | 3.832 | 1.00 | 39.17 | N0   |    |
| ANISOU 1244 N SER A 80   | 6130    | 4680    | 4080  | 0    | 1120  | -140 | N0 |
| ATOM 1245 CA SER A 80    | -34.089 | -12.334 | 2.451 | 1.00 | 39.76 | C0   |    |
| ANISOU 1245 CA SER A 80  | 6260    | 4780    | 4070  | 0    | 1150  | -170 | C0 |
| ATOM 1246 C SER A 80     | -34.857 | -13.663 | 2.439 | 1.00 | 39.17 | C0   |    |
| ANISOU 1246 C SER A 80   | 6130    | 4750    | 4000  | 0    | 1080  | -220 | C0 |
| ATOM 1247 O SER A 80     | -35.073 | -14.190 | 1.335 | 1.00 | 39.52 | O0   |    |
| ANISOU 1247 O SER A 80   | 6220    | 4830    | 3960  | -10  | 1100  | -260 | O0 |
| ATOM 1248 CB SER A 80    | -32.729 | -12.503 | 1.831 | 1.00 | 40.28 | C0   |    |
| ANISOU 1248 CB SER A 80  | 6340    | 4810    | 4160  | -50  | 1260  | -200 | C0 |
| ATOM 1249 OG SER A 80    | -32.134 | -11.240 | 1.598 | 1.00 | 40.92 | O0   |    |
| ANISOU 1249 OG SER A 80  | 6500    | 4850    | 4200  | -70  | 1330  | -160 | O0 |
| ATOM 1250 H SER A 80     | -33.234 | -12.070 | 4.259 | 1.00 | 39.06 | H0   |    |
| ANISOU 1250 H SER A 80   | 6060    | 4650    | 4140  | -30  | 1150  | -150 | H0 |
| ATOM 1251 HA SER A 80    | -34.600 | -11.682 | 1.901 | 1.00 | 40.12 | H0   |    |
| ANISOU 1251 HA SER A 80  | 6380    | 4840    | 4020  | 30   | 1130  | -140 | H0 |
| ATOM 1252 HB2 SER A 80   | -32.157 | -13.032 | 2.431 | 1.00 | 40.01 | H0   |    |
| ANISOU 1252 HB2 SER A 80 | 6230    | 4760    | 4210  | -70  | 1270  | -220 | H0 |
| ATOM 1253 HB3 SER A 80   | -32.814 | -12.988 | 0.979 | 1.00 | 40.77 | H0   |    |
| ANISOU 1253 HB3 SER A 80 | 6440    | 4890    | 4170  | -50  | 1280  | -230 | H0 |
| ATOM 1254 N LEU A 81     | -35.252 | -14.177 | 3.609 | 1.00 | 38.45 | N0   |    |
| ANISOU 1254 N LEU A 81   | 5950    | 4670    | 3990  | 0    | 1020  | -220 | N0 |
| ATOM 1255 CA LEU A 81    | -35.759 | -15.565 | 3.783 | 1.00 | 38.92 | C0   |    |
| ANISOU 1255 CA LEU A 81  | 5960    | 4740    | 4080  | -30  | 990   | -280 | C0 |
| ATOM 1256 C LEU A 81     | -37.082 | -15.568 | 4.547 | 1.00 | 38.27 | C0   |    |
| ANISOU 1256 C LEU A 81   | 5830    | 4720    | 3990  | -20  | 890   | -270 | C0 |
| ATOM 1257 O LEU A 81     | -37.254 | -14.711 | 5.433 | 1.00 | 38.49 | O0   |    |
| ANISOU 1257 O LEU A 81   | 5830    | 4750    | 4040  | 10   | 860   | -220 | O0 |
| ATOM 1258 CB LEU A 81    | -34.727 | -16.377 | 4.570 | 1.00 | 38.72 | C0   |    |
| ANISOU 1258 CB LEU A 81  | 5870    | 4650    | 4190  | -40  | 1040  | -290 | C0 |
| ATOM 1259 CG LEU A 81    | -33.454 | -16.739 | 3.815 | 1.00 | 39.25 | C0   |    |
| ANISOU 1259 CG LEU A 81  | 5960    | 4680    | 4280  | -50  | 1140  | -320 | C0 |
| ATOM 1260 CD1 LEU A 81   | -32.402 | -17.256 | 4.777 | 1.00 | 39.72 | C0   |    |
| ANISOU 1260 CD1 LEU A 81 | 5930    | 4700    | 4460  | -40  | 1170  | -310 | C0 |
| ATOM 1261 CD2 LEU A 81   | -33.745 | -17.760 | 2.731 | 1.00 | 39.82 | C0   |    |
| ANISOU 1261 CD2 LEU A 81 | 6080    | 4750    | 4300  | -80  | 1170  | -390 | C0 |
| ATOM 1262 H LEU A 81     | -35.241 | -13.700 | 4.382 | 1.00 | 38.17 | H0   |    |
| ANISOU 1262 H LEU A 81   | 5890    | 4620    | 3990  | 0    | 1010  | -190 | H0 |
| ATOM 1263 HA LEU A 81    | -35.897 | -15.968 | 2.899 | 1.00 | 39.33 | H0   |    |
| ANISOU 1263 HA LEU A 81  | 6050    | 4810    | 4080  | -40  | 1010  | -320 | H0 |
| ATOM 1264 HB2 LEU A 81   | -34.479 | -15.867 | 5.367 | 1.00 | 38.27 | H0   |    |
| ANISOU 1264 HB2 LEU A 81 | 5770    | 4590    | 4180  | -30  | 1020  | -250 | H0 |
| ATOM 1265 HB3 LEU A 81   | -35.152 | -17.205 | 4.872 | 1.00 | 38.64 | H0   |    |
| ANISOU 1265 HB3 LEU A 81 | 5840    | 4640    | 4200  | -60  | 1010  | -310 | H0 |

|                           |         |         |       |      |       |      |    |
|---------------------------|---------|---------|-------|------|-------|------|----|
| ATOM 1266 HG LEU A 81     | -33.106 | -15.920 | 3.384 | 1.00 | 39.53 | H0   |    |
| ANISOU 1266 HG LEU A 81   | 6030    | 4720    | 4280  | -50  | 1170  | -300 | H0 |
| ATOM 1267 HD11 LEU A 81   | -32.191 | -16.565 | 5.429 | 1.00 | 39.15 | H0   |    |
| ANISOU 1267 HD11 LEU A 81 | 5820    | 4640    | 4410  | -40  | 1160  | -280 | H0 |
| ATOM 1268 HD12 LEU A 81   | -31.598 | -17.491 | 4.283 | 1.00 | 39.97 | H0   |    |
| ANISOU 1268 HD12 LEU A 81 | 5960    | 4710    | 4510  | -40  | 1240  | -340 | H0 |
| ATOM 1269 HD13 LEU A 81   | -32.741 | -18.043 | 5.237 | 1.00 | 39.40 | H0   |    |
| ANISOU 1269 HD13 LEU A 81 | 5870    | 4640    | 4460  | -40  | 1150  | -320 | H0 |
| ATOM 1270 HD21 LEU A 81   | -34.250 | -18.501 | 3.109 | 1.00 | 39.79 | H0   |    |
| ANISOU 1270 HD21 LEU A 81 | 6060    | 4740    | 4320  | -90  | 1140  | -410 | H0 |
| ATOM 1271 HD22 LEU A 81   | -32.907 | -18.093 | 2.366 | 1.00 | 40.26 | H0   |    |
| ANISOU 1271 HD22 LEU A 81 | 6140    | 4770    | 4380  | -80  | 1240  | -420 | H0 |
| ATOM 1272 HD23 LEU A 81   | -34.263 | -17.343 | 2.021 | 1.00 | 40.15 | H0   |    |
| ANISOU 1272 HD23 LEU A 81 | 6170    | 4830    | 4250  | -80  | 1150  | -400 | H0 |
| ATOM 1273 N TRP A 82      | -37.957 | -16.530 | 4.246 | 1.00 | 38.29 | N0   |    |
| ANISOU 1273 N TRP A 82    | 5820    | 4770    | 3950  | -50  | 850   | -320 | N0 |
| ATOM 1274 CA TRP A 82     | -39.016 | -16.954 | 5.195 | 1.00 | 37.84 | C0   |    |
| ANISOU 1274 CA TRP A 82   | 5700    | 4760    | 3920  | -70  | 780   | -330 | C0 |
| ATOM 1275 C TRP A 82      | -38.321 | -17.636 | 6.374 | 1.00 | 37.68 | C0   |    |
| ANISOU 1275 C TRP A 82    | 5630    | 4660    | 4030  | -90  | 810   | -320 | C0 |
| ATOM 1276 O TRP A 82      | -37.432 | -18.469 | 6.127 | 1.00 | 37.63 | O0   |    |
| ANISOU 1276 O TRP A 82    | 5640    | 4580    | 4080  | -110 | 880   | -340 | O0 |
| ATOM 1277 CB TRP A 82     | -40.065 | -17.882 | 4.571 | 1.00 | 38.06 | C0   |    |
| ANISOU 1277 CB TRP A 82   | 5720    | 4870    | 3870  | -130 | 750   | -410 | C0 |
| ATOM 1278 CG TRP A 82     | -41.057 | -18.358 | 5.594 | 1.00 | 37.62 | C0   |    |
| ANISOU 1278 CG TRP A 82   | 5590    | 4860    | 3850  | -170 | 690   | -420 | C0 |
| ATOM 1279 CD1 TRP A 82    | -42.185 | -17.708 | 6.004 | 1.00 | 37.29 | C0   |    |
| ANISOU 1279 CD1 TRP A 82  | 5490    | 4930    | 3750  | -140 | 610   | -400 | C0 |
| ATOM 1280 CD2 TRP A 82    | -40.976 | -19.558 | 6.388 | 1.00 | 36.94 | C0   |    |
| ANISOU 1280 CD2 TRP A 82  | 5480    | 4700    | 3850  | -230 | 710   | -440 | C0 |
| ATOM 1281 NE1 TRP A 82    | -42.824 | -18.428 | 6.977 | 1.00 | 37.26 | N0   |    |
| ANISOU 1281 NE1 TRP A 82  | 5420    | 4940    | 3800  | -200 | 580   | -420 | N0 |
| ATOM 1282 CE2 TRP A 82    | -42.109 | -19.570 | 7.233 | 1.00 | 37.14 | C0   |    |
| ANISOU 1282 CE2 TRP A 82  | 5440    | 4800    | 3870  | -260 | 650   | -440 | C0 |
| ATOM 1283 CE3 TRP A 82    | -40.077 | -20.629 | 6.457 | 1.00 | 36.65 | C0   |    |
| ANISOU 1283 CE3 TRP A 82  | 5490    | 4540    | 3900  | -260 | 790   | -470 | C0 |
| ATOM 1284 CZ2 TRP A 82    | -42.356 | -20.610 | 8.130 | 1.00 | 36.69 | C0   |    |
| ANISOU 1284 CZ2 TRP A 82  | 5360    | 4700    | 3880  | -330 | 660   | -460 | C0 |
| ATOM 1285 CZ3 TRP A 82    | -40.323 | -21.658 | 7.340 | 1.00 | 36.75 | C0   |    |
| ANISOU 1285 CZ3 TRP A 82  | 5490    | 4490    | 3980  | -320 | 810   | -480 | C0 |
| ATOM 1286 CH2 TRP A 82    | -41.449 | -21.648 | 8.163 | 1.00 | 36.88 | C0   |    |
| ANISOU 1286 CH2 TRP A 82  | 5440    | 4580    | 3980  | -360 | 740   | -470 | C0 |
| ATOM 1287 H TRP A 82      | -37.961 | -16.981 | 3.454 | 1.00 | 38.85 | H0   |    |
| ANISOU 1287 H TRP A 82    | 5930    | 4850    | 3980  | -70  | 870   | -360 | H0 |
| ATOM 1288 HA TRP A 82     | -39.477 | -16.146 | 5.518 | 1.00 | 37.69 | H0   |    |
| ANISOU 1288 HA TRP A 82   | 5660    | 4780    | 3870  | -30  | 740   | -290 | H0 |
| ATOM 1289 HB2 TRP A 82    | -40.533 | -17.399 | 3.861 | 1.00 | 38.57 | H0   |    |
| ANISOU 1289 HB2 TRP A 82  | 5810    | 5000    | 3850  | -110 | 720   | -410 | H0 |
| ATOM 1290 HB3 TRP A 82    | -39.610 | -18.652 | 4.172 | 1.00 | 38.44 | H0   |    |
| ANISOU 1290 HB3 TRP A 82  | 5800    | 4860    | 3940  | -170 | 800   | -450 | H0 |
| ATOM 1291 HD1 TRP A 82    | -42.491 | -16.882 | 5.664 | 1.00 | 37.50 | H0   |    |
| ANISOU 1291 HD1 TRP A 82  | 5520    | 5010    | 3710  | -80  | 580   | -370 | H0 |
| ATOM 1292 HE1 TRP A 82    | -43.571 | -18.199 | 7.366 | 1.00 | 37.21 | H0   |    |
| ANISOU 1292 HE1 TRP A 82  | 5370    | 5000    | 3770  | -190 | 540   | -420 | H0 |

|                           |         |         |        |      |       |      |    |
|---------------------------|---------|---------|--------|------|-------|------|----|
| ATOM 1293 HE3 TRP A 82    | -39.314 | -20.646 | 5.902  | 1.00 | 36.96 | H0   |    |
| ANISOU 1293 HE3 TRP A 82  | 5570    | 4530    | 3950   | -240 | 840   | -470 | H0 |
| ATOM 1294 HZ2 TRP A 82    | -43.117 | -20.605 | 8.684  | 1.00 | 36.81 | H0   |    |
| ANISOU 1294 HZ2 TRP A 82  | 5330    | 4770    | 3890   | -360 | 630   | -460 | H0 |
| ATOM 1295 HZ3 TRP A 82    | -39.718 | -22.381 | 7.391  | 1.00 | 37.09 | H0   |    |
| ANISOU 1295 HZ3 TRP A 82  | 5570    | 4440    | 4080   | -320 | 860   | -490 | H0 |
| ATOM 1296 HH2 TRP A 82    | -41.588 | -22.361 | 8.761  | 1.00 | 37.00 | H0   |    |
| ANISOU 1296 HH2 TRP A 82  | 5460    | 4550    | 4040   | -400 | 760   | -480 | H0 |
| ATOM 1297 N VAL A 83      | -38.726 | -17.285 | 7.593  | 1.00 | 37.21 | N0   |    |
| ANISOU 1297 N VAL A 83    | 5510    | 4620    | 4010   | -80  | 760   | -280 | N0 |
| ATOM 1298 CA VAL A 83     | -38.232 | -17.878 | 8.868  | 1.00 | 36.97 | C0   |    |
| ANISOU 1298 CA VAL A 83   | 5430    | 4530    | 4090   | -90  | 770   | -250 | C0 |
| ATOM 1299 C VAL A 83      | -39.456 | -18.267 | 9.693  | 1.00 | 36.25 | C0   |    |
| ANISOU 1299 C VAL A 83    | 5290    | 4490    | 3990   | -120 | 710   | -260 | C0 |
| ATOM 1300 O VAL A 83      | -40.462 | -17.560 | 9.667  | 1.00 | 36.12 | O0   |    |
| ANISOU 1300 O VAL A 83    | 5250    | 4560    | 3910   | -110 | 650   | -260 | O0 |
| ATOM 1301 CB VAL A 83     | -37.315 | -16.871 | 9.586  | 1.00 | 37.32 | C0   |    |
| ANISOU 1301 CB VAL A 83   | 5450    | 4550    | 4180   | -50  | 780   | -200 | C0 |
| ATOM 1302 CG1 VAL A 83    | -36.992 | -17.266 | 11.020 | 1.00 | 37.88 | C0   |    |
| ANISOU 1302 CG1 VAL A 83  | 5450    | 4600    | 4330   | -50  | 770   | -160 | C0 |
| ATOM 1303 CG2 VAL A 83    | -36.041 | -16.656 | 8.787  | 1.00 | 37.49 | C0   |    |
| ANISOU 1303 CG2 VAL A 83  | 5500    | 4530    | 4210   | -30  | 860   | -200 | C0 |
| ATOM 1304 H VAL A 83      | -39.351 | -16.634 | 7.725  | 1.00 | 37.14 | H0   |    |
| ANISOU 1304 H VAL A 83    | 5490    | 4660    | 3960   | -50  | 720   | -260 | H0 |
| ATOM 1305 HA VAL A 83     | -37.721 | -18.678 | 8.661  | 1.00 | 37.24 | H0   |    |
| ANISOU 1305 HA VAL A 83   | 5480    | 4510    | 4160   | -100 | 810   | -270 | H0 |
| ATOM 1306 HB VAL A 83     | -37.796 | -16.008 | 9.616  | 1.00 | 37.17 | H0   |    |
| ANISOU 1306 HB VAL A 83   | 5430    | 4570    | 4120   | -30  | 750   | -180 | H0 |
| ATOM 1307 HG11 VAL A 83   | -37.814 | -17.337 | 11.535 | 1.00 | 37.43 | H0   |    |
| ANISOU 1307 HG11 VAL A 83 | 5380    | 4580    | 4260   | -60  | 720   | -160 | H0 |
| ATOM 1308 HG12 VAL A 83   | -36.419 | -16.589 | 11.421 | 1.00 | 37.36 | H0   |    |
| ANISOU 1308 HG12 VAL A 83 | 5370    | 4540    | 4290   | -30  | 770   | -140 | H0 |
| ATOM 1309 HG13 VAL A 83   | -36.530 | -18.122 | 11.026 | 1.00 | 37.81 | H0   |    |
| ANISOU 1309 HG13 VAL A 83 | 5440    | 4550    | 4370   | -50  | 800   | -170 | H0 |
| ATOM 1310 HG21 VAL A 83   | -35.639 | -17.517 | 8.577  | 1.00 | 37.79 | H0   |    |
| ANISOU 1310 HG21 VAL A 83 | 5540    | 4530    | 4290   | -40  | 890   | -220 | H0 |
| ATOM 1311 HG22 VAL A 83   | -35.415 | -16.127 | 9.310  | 1.00 | 37.31 | H0   |    |
| ANISOU 1311 HG22 VAL A 83 | 5450    | 4500    | 4230   | -20  | 870   | -170 | H0 |
| ATOM 1312 HG23 VAL A 83   | -36.250 | -16.187 | 7.961  | 1.00 | 37.76 | H0   |    |
| ANISOU 1312 HG23 VAL A 83 | 5580    | 4580    | 4190   | -30  | 860   | -210 | H0 |
| ATOM 1313 N PRO A 84      | -39.427 | -19.407 | 10.420 | 1.00 | 35.94 | N0   |    |
| ANISOU 1313 N PRO A 84    | 5240    | 4400    | 4020   | -160 | 720   | -260 | N0 |
| ATOM 1314 CA PRO A 84     | -40.535 | -19.792 | 11.291 | 1.00 | 35.83 | C0   |    |
| ANISOU 1314 CA PRO A 84   | 5180    | 4430    | 4000   | -210 | 680   | -270 | C0 |
| ATOM 1315 C PRO A 84      | -40.869 | -18.692 | 12.310 | 1.00 | 34.34 | C0   |    |
| ANISOU 1315 C PRO A 84    | 4930    | 4310    | 3800   | -170 | 620   | -220 | C0 |
| ATOM 1316 O PRO A 84      | -39.948 | -18.131 | 12.862 | 1.00 | 33.77 | O0   |    |
| ANISOU 1316 O PRO A 84    | 4850    | 4200    | 3780   | -120 | 640   | -170 | O0 |
| ATOM 1317 CB PRO A 84     | -40.021 | -21.035 | 12.033 | 1.00 | 36.34 | C0   |    |
| ANISOU 1317 CB PRO A 84   | 5260    | 4400    | 4140   | -230 | 720   | -250 | C0 |
| ATOM 1318 CG PRO A 84     | -38.917 | -21.579 | 11.168 | 1.00 | 36.79 | C0   |    |
| ANISOU 1318 CG PRO A 84   | 5380    | 4360    | 4240   | -210 | 800   | -270 | C0 |
| ATOM 1319 CD PRO A 84     | -38.328 | -20.384 | 10.449 | 1.00 | 36.64 | C0   |    |
| ANISOU 1319 CD PRO A 84   | 5360    | 4380    | 4180   | -160 | 790   | -260 | C0 |

|                          |         |         |        |      |       |      |    |
|--------------------------|---------|---------|--------|------|-------|------|----|
| ATOM 1320 HA PRO A 84    | -41.330 | -20.024 | 10.748 | 1.00 | 36.15 | H0   |    |
| ANISOU 1320 HA PRO A 84  | 5230    | 4530    | 3980   | -250 | 660   | -310 | H0 |
| ATOM 1321 HB2 PRO A 84   | -39.676 | -20.795 | 12.916 | 1.00 | 35.91 | H0   |    |
| ANISOU 1321 HB2 PRO A 84 | 5180    | 4340    | 4130   | -210 | 710   | -200 | H0 |
| ATOM 1322 HB3 PRO A 84   | -40.736 | -21.698 | 12.143 | 1.00 | 36.66 | H0   |    |
| ANISOU 1322 HB3 PRO A 84 | 5310    | 4440    | 4170   | -290 | 720   | -280 | H0 |
| ATOM 1323 HG2 PRO A 84   | -38.236 | -22.021 | 11.715 | 1.00 | 36.87 | H0   |    |
| ANISOU 1323 HG2 PRO A 84 | 5390    | 4310    | 4310   | -180 | 820   | -230 | H0 |
| ATOM 1324 HG3 PRO A 84   | -39.270 | -22.227 | 10.524 | 1.00 | 37.37 | H0   |    |
| ANISOU 1324 HG3 PRO A 84 | 5500    | 4420    | 4290   | -260 | 820   | -320 | H0 |
| ATOM 1325 HD2 PRO A 84   | -37.560 | -20.031 | 10.933 | 1.00 | 36.20 | H0   |    |
| ANISOU 1325 HD2 PRO A 84 | 5280    | 4310    | 4170   | -110 | 800   | -220 | H0 |
| ATOM 1326 HD3 PRO A 84   | -38.051 | -20.625 | 9.547  | 1.00 | 36.88 | H0   |    |
| ANISOU 1326 HD3 PRO A 84 | 5430    | 4390    | 4200   | -160 | 830   | -300 | H0 |
| ATOM 1327 N ASP A 85     | -42.161 | -18.419 | 12.526 | 1.00 | 34.25 | N0   |    |
| ANISOU 1327 N ASP A 85   | 4880    | 4400    | 3730   | -190 | 570   | -240 | N0 |
| ATOM 1328 CA ASP A 85    | -42.665 | -17.431 | 13.522 | 1.00 | 33.05 | C0   |    |
| ANISOU 1328 CA ASP A 85  | 4670    | 4310    | 3570   | -150 | 520   | -200 | C0 |
| ATOM 1329 C ASP A 85     | -42.706 | -18.089 | 14.909 | 1.00 | 32.85 | C0   |    |
| ANISOU 1329 C ASP A 85   | 4610    | 4270    | 3610   | -190 | 530   | -170 | C0 |
| ATOM 1330 O ASP A 85     | -43.795 | -18.147 | 15.520 | 1.00 | 32.91 | O0   |    |
| ANISOU 1330 O ASP A 85   | 4570    | 4360    | 3580   | -230 | 500   | -190 | O0 |
| ATOM 1331 CB ASP A 85    | -44.039 | -16.892 | 13.121 | 1.00 | 33.02 | C0   |    |
| ANISOU 1331 CB ASP A 85  | 4630    | 4440    | 3480   | -140 | 470   | -230 | C0 |
| ATOM 1332 CG ASP A 85    | -45.134 | -17.946 | 13.134 | 1.00 | 33.59 | C0   |    |
| ANISOU 1332 CG ASP A 85  | 4650    | 4590    | 3520   | -230 | 450   | -290 | C0 |
| ATOM 1333 OD1 ASP A 85   | -44.803 | -19.127 | 12.911 | 1.00 | 34.27 | O0   |    |
| ANISOU 1333 OD1 ASP A 85 | 4780    | 4600    | 3640   | -310 | 500   | -320 | O0 |
| ATOM 1334 OD2 ASP A 85   | -46.306 | -17.582 | 13.375 | 1.00 | 33.25 | O0   |    |
| ANISOU 1334 OD2 ASP A 85 | 4540    | 4680    | 3420   | -230 | 410   | -310 | O0 |
| ATOM 1335 H ASP A 85     | -42.824 | -18.835 | 12.061 | 1.00 | 34.55 | H0   |    |
| ANISOU 1335 H ASP A 85   | 4920    | 4480    | 3730   | -230 | 560   | -280 | H0 |
| ATOM 1336 HA ASP A 85    | -42.034 | -16.674 | 13.553 | 1.00 | 32.80 | H0   |    |
| ANISOU 1336 HA ASP A 85  | 4650    | 4250    | 3550   | -100 | 530   | -170 | H0 |
| ATOM 1337 HB2 ASP A 85   | -44.294 | -16.175 | 13.737 | 1.00 | 32.89 | H0   |    |
| ANISOU 1337 HB2 ASP A 85 | 4580    | 4460    | 3460   | -100 | 450   | -210 | H0 |
| ATOM 1338 HB3 ASP A 85   | -43.984 | -16.515 | 12.220 | 1.00 | 33.35 | H0   |    |
| ANISOU 1338 HB3 ASP A 85 | 4700    | 4500    | 3480   | -100 | 470   | -240 | H0 |
| ATOM 1339 N LEU A 86     | -41.565 | -18.577 | 15.395 | 1.00 | 32.77 | N0   |    |
| ANISOU 1339 N LEU A 86   | 4620    | 4160    | 3670   | -190 | 570   | -130 | N0 |
| ATOM 1340 CA LEU A 86    | -41.502 | -19.337 | 16.670 | 1.00 | 33.20 | C0   |    |
| ANISOU 1340 CA LEU A 86  | 4660    | 4190    | 3770   | -220 | 570   | -100 | C0 |
| ATOM 1341 C LEU A 86     | -41.576 | -18.342 | 17.828 | 1.00 | 32.51 | C0   |    |
| ANISOU 1341 C LEU A 86   | 4520    | 4160    | 3670   | -190 | 540   | -60  | C0 |
| ATOM 1342 O LEU A 86     | -40.997 | -17.244 | 17.714 | 1.00 | 31.61 | O0   |    |
| ANISOU 1342 O LEU A 86   | 4400    | 4060    | 3560   | -140 | 530   | -50  | O0 |
| ATOM 1343 CB LEU A 86    | -40.224 | -20.180 | 16.716 | 1.00 | 33.96 | C0   |    |
| ANISOU 1343 CB LEU A 86  | 4790    | 4180    | 3930   | -200 | 620   | -60  | C0 |
| ATOM 1344 CG LEU A 86    | -40.143 | -21.302 | 15.680 | 1.00 | 35.33 | C0   |    |
| ANISOU 1344 CG LEU A 86  | 5040    | 4270    | 4120   | -230 | 670   | -100 | C0 |
| ATOM 1345 CD1 LEU A 86   | -38.926 | -22.181 | 15.921 | 1.00 | 36.28 | C0   |    |
| ANISOU 1345 CD1 LEU A 86 | 5190    | 4280    | 4310   | -180 | 730   | -60  | C0 |
| ATOM 1346 CD2 LEU A 86   | -41.408 | -22.152 | 15.669 | 1.00 | 36.06 | C0   |    |
| ANISOU 1346 CD2 LEU A 86 | 5150    | 4380    | 4170   | -330 | 680   | -150 | C0 |

|                           |         |         |        |      |       |      |    |
|---------------------------|---------|---------|--------|------|-------|------|----|
| ATOM 1347 H LEU A 86      | -40.760 | -18.460 | 14.987 | 1.00 | 32.77 | H0   |    |
| ANISOU 1347 H LEU A 86    | 4650    | 4120    | 3690   | -160 | 590   | -130 | H0 |
| ATOM 1348 HA LEU A 86     | -42.285 | -19.928 | 16.714 | 1.00 | 33.54 | H0   |    |
| ANISOU 1348 HA LEU A 86   | 4700    | 4250    | 3790   | -280 | 570   | -120 | H0 |
| ATOM 1349 HB2 LEU A 86    | -39.457 | -19.586 | 16.590 | 1.00 | 33.73 | H0   |    |
| ANISOU 1349 HB2 LEU A 86  | 4760    | 4140    | 3910   | -150 | 620   | -50  | H0 |
| ATOM 1350 HB3 LEU A 86    | -40.148 | -20.575 | 17.607 | 1.00 | 34.07 | H0   |    |
| ANISOU 1350 HB3 LEU A 86  | 4800    | 4180    | 3970   | -200 | 620   | -20  | H0 |
| ATOM 1351 HG LEU A 86     | -40.047 | -20.886 | 14.792 | 1.00 | 35.27 | H0   |    |
| ANISOU 1351 HG LEU A 86   | 5040    | 4280    | 4080   | -220 | 680   | -140 | H0 |
| ATOM 1352 HD11 LEU A 86   | -38.122 | -21.632 | 15.911 | 1.00 | 35.83 | H0   |    |
| ANISOU 1352 HD11 LEU A 86 | 5110    | 4230    | 4270   | -130 | 730   | -40  | H0 |
| ATOM 1353 HD12 LEU A 86   | -38.867 | -22.854 | 15.220 | 1.00 | 36.57 | H0   |    |
| ANISOU 1353 HD12 LEU A 86 | 5280    | 4260    | 4350   | -200 | 770   | -90  | H0 |
| ATOM 1354 HD13 LEU A 86   | -39.007 | -22.620 | 16.785 | 1.00 | 36.27 | H0   |    |
| ANISOU 1354 HD13 LEU A 86 | 5190    | 4260    | 4320   | -190 | 730   | -20  | H0 |
| ATOM 1355 HD21 LEU A 86   | -41.697 | -22.316 | 16.583 | 1.00 | 36.01 | H0   |    |
| ANISOU 1355 HD21 LEU A 86 | 5120    | 4380    | 4180   | -350 | 670   | -120 | H0 |
| ATOM 1356 HD22 LEU A 86   | -41.226 | -23.001 | 15.230 | 1.00 | 36.54 | H0   |    |
| ANISOU 1356 HD22 LEU A 86 | 5270    | 4360    | 4250   | -350 | 720   | -170 | H0 |
| ATOM 1357 HD23 LEU A 86   | -42.111 | -21.683 | 15.185 | 1.00 | 35.96 | H0   |    |
| ANISOU 1357 HD23 LEU A 86 | 5110    | 4440    | 4110   | -350 | 650   | -190 | H0 |
| ATOM 1358 N ALA A 87      | -42.321 | -18.692 | 18.875 | 1.00 | 32.82 | N0   |    |
| ANISOU 1358 N ALA A 87    | 4520    | 4240    | 3700   | -240 | 520   | -50  | N0 |
| ATOM 1359 CA ALA A 87     | -42.335 | -17.957 | 20.160 | 1.00 | 33.01 | C0   |    |
| ANISOU 1359 CA ALA A 87   | 4500    | 4320    | 3720   | -220 | 490   | -10  | C0 |
| ATOM 1360 C ALA A 87      | -42.108 | -18.946 | 21.302 | 1.00 | 33.86 | C0   |    |
| ANISOU 1360 C ALA A 87    | 4610    | 4400    | 3860   | -250 | 510   | 40   | C0 |
| ATOM 1361 O ALA A 87      | -42.626 | -20.083 | 21.231 | 1.00 | 32.70 | O0   |    |
| ANISOU 1361 O ALA A 87    | 4490    | 4220    | 3710   | -310 | 530   | 30   | O0 |
| ATOM 1362 CB ALA A 87     | -43.626 | -17.198 | 20.334 | 1.00 | 32.70 | C0   |    |
| ANISOU 1362 CB ALA A 87   | 4410    | 4390    | 3630   | -220 | 460   | -50  | C0 |
| ATOM 1363 H ALA A 87      | -42.881 | -19.411 | 18.878 | 1.00 | 33.25 | H0   |    |
| ANISOU 1363 H ALA A 87    | 4580    | 4300    | 3750   | -290 | 530   | -60  | H0 |
| ATOM 1364 HA ALA A 87     | -41.589 | -17.311 | 20.157 | 1.00 | 32.71 | H0   |    |
| ANISOU 1364 HA ALA A 87   | 4460    | 4270    | 3700   | -180 | 490   | 0    | H0 |
| ATOM 1365 HB1 ALA A 87    | -43.613 | -16.724 | 21.182 | 1.00 | 32.66 | H0   |    |
| ANISOU 1365 HB1 ALA A 87  | 4380    | 4410    | 3620   | -210 | 450   | -30  | H0 |
| ATOM 1366 HB2 ALA A 87    | -43.728 | -16.559 | 19.609 | 1.00 | 32.72 | H0   |    |
| ANISOU 1366 HB2 ALA A 87  | 4420    | 4400    | 3610   | -190 | 450   | -70  | H0 |
| ATOM 1367 HB3 ALA A 87    | -44.373 | -17.820 | 20.322 | 1.00 | 33.15 | H0   |    |
| ANISOU 1367 HB3 ALA A 87  | 4460    | 4470    | 3670   | -270 | 460   | -70  | H0 |
| ATOM 1368 N ALA A 88      | -41.340 | -18.515 | 22.301 | 1.00 | 34.92 | N0   |    |
| ANISOU 1368 N ALA A 88    | 4720    | 4550    | 4000   | -220 | 490   | 80   | N0 |
| ATOM 1369 CA ALA A 88     | -41.201 | -19.201 | 23.599 | 1.00 | 36.59 | C0   |    |
| ANISOU 1369 CA ALA A 88   | 4930    | 4760    | 4210   | -240 | 500   | 140  | C0 |
| ATOM 1370 C ALA A 88      | -42.399 | -18.794 | 24.457 | 1.00 | 37.94 | C0   |    |
| ANISOU 1370 C ALA A 88    | 5060    | 5030    | 4330   | -290 | 480   | 130  | C0 |
| ATOM 1371 O ALA A 88      | -42.426 | -17.648 | 24.930 | 1.00 | 39.10 | O0   |    |
| ANISOU 1371 O ALA A 88    | 5160    | 5240    | 4450   | -270 | 450   | 110  | O0 |
| ATOM 1372 CB ALA A 88     | -39.885 | -18.844 | 24.232 | 1.00 | 37.20 | C0   |    |
| ANISOU 1372 CB ALA A 88   | 4980    | 4850    | 4310   | -190 | 480   | 190  | C0 |
| ATOM 1373 H ALA A 88      | -40.841 | -17.753 | 22.256 | 1.00 | 34.64 | H0   |    |
| ANISOU 1373 H ALA A 88    | 4670    | 4520    | 3970   | -190 | 490   | 80   | H0 |



|                          |                        |               |    |
|--------------------------|------------------------|---------------|----|
| ATOM 1374 HA ALA A 88    | -41.233 -20.172 23.449 | 1.00 37.11    | H0 |
| ANISOU 1374 HA ALA A 88  | 5030 4770 4300         | -260 520 160  | H0 |
| ATOM 1375 HB1 ALA A 88   | -39.699 -19.463 24.956 | 1.00 37.37    | H0 |
| ANISOU 1375 HB1 ALA A 88 | 5000 4860 4330         | -190 480 240  | H0 |
| ATOM 1376 HB2 ALA A 88   | -39.178 -18.905 23.567 | 1.00 36.97    | H0 |
| ANISOU 1376 HB2 ALA A 88 | 4960 4780 4310         | -150 500 190  | H0 |
| ATOM 1377 HB3 ALA A 88   | -39.923 -17.938 24.580 | 1.00 36.73    | H0 |
| ANISOU 1377 HB3 ALA A 88 | 4880 4840 4230         | -190 460 170  | H0 |
| ATOM 1378 N TYR A 89     | -43.362 -19.703 24.612 | 1.00 39.27    | N0 |
| ANISOU 1378 N TYR A 89   | 5240 5190 4490         | -360 500 120  | N0 |
| ATOM 1379 CA TYR A 89    | -44.726 -19.423 25.124 | 1.00 40.41    | C0 |
| ANISOU 1379 CA TYR A 89  | 5340 5440 4580         | -420 490 80   | C0 |
| ATOM 1380 C TYR A 89     | -44.661 -18.874 26.555 | 1.00 40.97    | C0 |
| ANISOU 1380 C TYR A 89   | 5370 5580 4610         | -420 470 120  | C0 |
| ATOM 1381 O TYR A 89     | -45.489 -18.004 26.867 | 1.00 42.38    | O0 |
| ANISOU 1381 O TYR A 89   | 5500 5860 4750         | -420 460 70   | O0 |
| ATOM 1382 CB TYR A 89    | -45.598 -20.673 24.979 | 1.00 42.37    | C0 |
| ANISOU 1382 CB TYR A 89  | 5620 5670 4820         | -520 530 70   | C0 |
| ATOM 1383 CG TYR A 89    | -45.906 -21.080 23.553 | 1.00 43.52    | C0 |
| ANISOU 1383 CG TYR A 89  | 5780 5780 4970         | -550 540 0    | C0 |
| ATOM 1384 CD1 TYR A 89   | -45.957 -20.145 22.530 | 1.00 43.35    | C0 |
| ANISOU 1384 CD1 TYR A 89 | 5730 5800 4940         | -490 510 -50  | C0 |
| ATOM 1385 CD2 TYR A 89   | -46.203 -22.396 23.226 | 1.00 45.07    | C0 |
| ANISOU 1385 CD2 TYR A 89 | 6050 5900 5180         | -640 590 -10  | C0 |
| ATOM 1386 CE1 TYR A 89   | -46.269 -20.504 21.229 | 1.00 44.44    | C0 |
| ANISOU 1386 CE1 TYR A 89 | 5890 5930 5070         | -510 520 -110 | C0 |
| ATOM 1387 CE2 TYR A 89   | -46.508 -22.775 21.927 | 1.00 45.28    | C0 |
| ANISOU 1387 CE2 TYR A 89 | 6090 5910 5200         | -680 610 -80  | C0 |
| ATOM 1388 CZ TYR A 89    | -46.542 -21.824 20.921 | 1.00 45.29    | C0 |
| ANISOU 1388 CZ TYR A 89  | 6050 5970 5190         | -610 560 -130 | C0 |
| ATOM 1389 OH TYR A 89    | -46.852 -22.154 19.629 | 1.00 46.21    | O0 |
| ANISOU 1389 OH TYR A 89  | 6180 6090 5290         | -650 570 -200 | O0 |
| ATOM 1390 H TYR A 89     | -43.241 -20.584 24.414 | 1.00 39.67    | H0 |
| ANISOU 1390 H TYR A 89   | 5340 5180 4550         | -380 520 140  | H0 |
| ATOM 1391 HA TYR A 89    | -45.118 -18.712 24.559 | 1.00 40.32    | H0 |
| ANISOU 1391 HA TYR A 89  | 5300 5470 4550         | -400 470 30   | H0 |
| ATOM 1392 HB2 TYR A 89   | -45.146 -21.418 25.428 | 1.00 42.63    | H0 |
| ANISOU 1392 HB2 TYR A 89 | 5700 5630 4870         | -530 550 120  | H0 |
| ATOM 1393 HB3 TYR A 89   | -46.442 -20.513 25.449 | 1.00 42.51    | H0 |
| ANISOU 1393 HB3 TYR A 89 | 5590 5760 4800         | -560 530 40   | H0 |
| ATOM 1394 HD1 TYR A 89   | -45.777 -19.241 22.721 | 1.00 43.04    | H0 |
| ANISOU 1394 HD1 TYR A 89 | 5660 5800 4890         | -430 480 -40  | H0 |
| ATOM 1395 HD2 TYR A 89   | -46.182 -23.053 23.902 | 1.00 45.32    | H0 |
| ANISOU 1395 HD2 TYR A 89 | 6120 5890 5220         | -680 620 30   | H0 |
| ATOM 1396 HE1 TYR A 89   | -46.288 -19.850 20.550 | 1.00 43.95    | H0 |
| ANISOU 1396 HE1 TYR A 89 | 5800 5900 4990         | -470 490 -130 | H0 |
| ATOM 1397 HE2 TYR A 89   | -46.698 -23.678 21.728 | 1.00 46.03    | H0 |
| ANISOU 1397 HE2 TYR A 89 | 6240 5950 5310         | -750 650 -100 | H0 |
| ATOM 1398 N ASN A 90     | -43.697 -19.309 27.376 | 1.00 40.75    | N0 |
| ANISOU 1398 N ASN A 90   | 5370 5510 4600         | -400 470 190  | N0 |
| ATOM 1399 CA ASN A 90    | -43.605 -18.912 28.811 | 1.00 40.80    | C0 |
| ANISOU 1399 CA ASN A 90  | 5350 5600 4560         | -400 460 230  | C0 |
| ATOM 1400 C ASN A 90     | -42.504 -17.860 29.007 | 1.00 39.52    | C0 |
| ANISOU 1400 C ASN A 90   | 5150 5460 4400         | -340 430 230  | C0 |

|                           |         |         |        |      |       |     |    |
|---------------------------|---------|---------|--------|------|-------|-----|----|
| ATOM 1401 O ASN A 90      | -42.078 | -17.660 | 30.161 | 1.00 | 38.68 | O0  |    |
| ANISOU 1401 O ASN A 90    | 5030    | 5420    | 4250   | -340 | 410   | 260 | O0 |
| ATOM 1402 CB ASN A 90     | -43.420 | -20.123 | 29.736 | 1.00 | 41.71 | C0  |    |
| ANISOU 1402 CB ASN A 90   | 5510    | 5680    | 4660   | -430 | 480   | 310 | C0 |
| ATOM 1403 CG ASN A 90     | -42.204 | -20.961 | 29.407 | 1.00 | 42.24 | C0  |    |
| ANISOU 1403 CG ASN A 90   | 5630    | 5640    | 4770   | -370 | 490   | 390 | C0 |
| ATOM 1404 OD1 ASN A 90    | -41.941 | -21.249 | 28.238 | 1.00 | 41.85 | O0  |    |
| ANISOU 1404 OD1 ASN A 90  | 5610    | 5510    | 4780   | -350 | 500   | 360 | O0 |
| ATOM 1405 ND2 ASN A 90    | -41.479 | -21.383 | 30.432 | 1.00 | 42.72 | N0  |    |
| ANISOU 1405 ND2 ASN A 90  | 5710    | 5720    | 4810   | -330 | 480   | 480 | N0 |
| ATOM 1406 H ASN A 90      | -43.037 | -19.873 | 27.105 | 1.00 | 40.92 | H0  |    |
| ANISOU 1406 H ASN A 90    | 5430    | 5470    | 4650   | -380 | 480   | 220 | H0 |
| ATOM 1407 HA ASN A 90     | -44.463 | -18.496 | 29.059 | 1.00 | 40.70 | H0  |    |
| ANISOU 1407 HA ASN A 90   | 5300    | 5650    | 4510   | -430 | 460   | 190 | H0 |
| ATOM 1408 HB2 ASN A 90    | -43.348 | -19.806 | 30.659 | 1.00 | 41.88 | H0  |    |
| ANISOU 1408 HB2 ASN A 90  | 5510    | 5770    | 4640   | -430 | 460   | 340 | H0 |
| ATOM 1409 HB3 ASN A 90    | -44.218 | -20.687 | 29.676 | 1.00 | 42.09 | H0  |    |
| ANISOU 1409 HB3 ASN A 90  | 5580    | 5720    | 4690   | -490 | 510   | 300 | H0 |
| ATOM 1410 HD21 ASN A 90   | -40.607 | -21.501 | 30.338 | 1.00 | 42.85 | H0  |    |
| ANISOU 1410 HD21 ASN A 90 | 5730    | 5710    | 4840   | -270 | 460   | 510 | H0 |
| ATOM 1411 HD22 ASN A 90   | -41.866 | -21.548 | 31.210 | 1.00 | 43.13 | H0  |    |
| ANISOU 1411 HD22 ASN A 90 | 5770    | 5810    | 4820   | -370 | 480   | 500 | H0 |
| ATOM 1412 N ALA A 91      | -42.081 | -17.181 | 27.937 | 1.00 | 38.38 | N0  |    |
| ANISOU 1412 N ALA A 91    | 5010    | 5280    | 4290   | -300 | 420   | 180 | N0 |
| ATOM 1413 CA ALA A 91     | -41.141 | -16.040 | 28.016 | 1.00 | 37.58 | C0  |    |
| ANISOU 1413 CA ALA A 91   | 4880    | 5200    | 4190   | -260 | 400   | 160 | C0 |
| ATOM 1414 C ALA A 91      | -41.869 | -14.832 | 28.607 | 1.00 | 37.18 | C0  |    |
| ANISOU 1414 C ALA A 91    | 4810    | 5230    | 4090   | -270 | 400   | 100 | C0 |
| ATOM 1415 O ALA A 91      | -43.090 | -14.689 | 28.371 | 1.00 | 36.85 | O0  |    |
| ANISOU 1415 O ALA A 91    | 4760    | 5210    | 4030   | -280 | 410   | 70  | O0 |
| ATOM 1416 CB ALA A 91     | -40.559 | -15.719 | 26.669 | 1.00 | 37.79 | C0  |    |
| ANISOU 1416 CB ALA A 91   | 4930    | 5160    | 4270   | -220 | 420   | 130 | C0 |
| ATOM 1417 H ALA A 91      | -42.337 | -17.365 | 27.083 | 1.00 | 38.28 | H0  |    |
| ANISOU 1417 H ALA A 91    | 5010    | 5230    | 4300   | -290 | 430   | 160 | H0 |
| ATOM 1418 HA ALA A 91     | -40.406 | -16.288 | 28.625 | 1.00 | 37.98 | H0  |    |
| ANISOU 1418 HA ALA A 91   | 4920    | 5270    | 4240   | -250 | 390   | 200 | H0 |
| ATOM 1419 HB1 ALA A 91    | -39.965 | -14.954 | 26.746 | 1.00 | 37.50 | H0  |    |
| ANISOU 1419 HB1 ALA A 91  | 4880    | 5140    | 4230   | -210 | 410   | 120 | H0 |
| ATOM 1420 HB2 ALA A 91    | -40.058 | -16.484 | 26.340 | 1.00 | 37.73 | H0  |    |
| ANISOU 1420 HB2 ALA A 91  | 4940    | 5110    | 4290   | -210 | 420   | 170 | H0 |
| ATOM 1421 HB3 ALA A 91    | -41.275 | -15.509 | 26.046 | 1.00 | 37.44 | H0  |    |
| ANISOU 1421 HB3 ALA A 91  | 4900    | 5110    | 4220   | -220 | 420   | 100 | H0 |
| ATOM 1422 N ILE A 92      | -41.137 | -14.009 | 29.361 | 1.00 | 36.71 | N0  |    |
| ANISOU 1422 N ILE A 92    | 4730    | 5210    | 4010   | -280 | 390   | 90  | N0 |
| ATOM 1423 CA ILE A 92     | -41.658 | -12.767 | 29.997 | 1.00 | 37.03 | C0  |    |
| ANISOU 1423 CA ILE A 92   | 4760    | 5310    | 4010   | -290 | 400   | 30  | C0 |
| ATOM 1424 C ILE A 92      | -40.781 | -11.578 | 29.599 | 1.00 | 37.16 | C0  |    |
| ANISOU 1424 C ILE A 92    | 4790    | 5290    | 4040   | -280 | 420   | -20 | C0 |
| ATOM 1425 O ILE A 92      | -41.022 | -10.480 | 30.104 | 1.00 | 38.80 | O0  |    |
| ANISOU 1425 O ILE A 92    | 5010    | 5520    | 4210   | -290 | 440   | -80 | O0 |
| ATOM 1426 CB ILE A 92     | -41.763 | -12.945 | 31.525 | 1.00 | 37.56 | C0  |    |
| ANISOU 1426 CB ILE A 92   | 4790    | 5470    | 4010   | -340 | 390   | 50  | C0 |
| ATOM 1427 CG1 ILE A 92    | -40.409 | -13.236 | 32.185 | 1.00 | 37.90 | C0  |    |
| ANISOU 1427 CG1 ILE A 92  | 4810    | 5550    | 4040   | -350 | 360   | 100 | C0 |

|                           |         |         |        |      |         |    |
|---------------------------|---------|---------|--------|------|---------|----|
| ATOM 1428 CG2 ILE A 92    | -42.787 | -14.019 | 31.841 | 1.00 | 37.69   | C0 |
| ANISOU 1428 CG2 ILE A 92  | 4800    | 5510    | 4010   | -360 | 390 90  | C0 |
| ATOM 1429 CD1 ILE A 92    | -40.455 | -13.217 | 33.698 | 1.00 | 38.70   | C0 |
| ANISOU 1429 CD1 ILE A 92  | 4880    | 5770    | 4060   | -390 | 340 110 | C0 |
| ATOM 1430 H ILE A 92      | -40.265 | -14.181 | 29.561 | 1.00 | 37.04   | H0 |
| ANISOU 1430 H ILE A 92    | 4760    | 5260    | 4060   | -270 | 380 120 | H0 |
| ATOM 1431 HA ILE A 92     | -42.555 | -12.605 | 29.654 | 1.00 | 36.95   | H0 |
| ANISOU 1431 HA ILE A 92   | 4750    | 5290    | 3990   | -280 | 410 0   | H0 |
| ATOM 1432 HB ILE A 92     | -42.098 | -12.094 | 31.901 | 1.00 | 37.65   | H0 |
| ANISOU 1432 HB ILE A 92   | 4800    | 5510    | 3990   | -340 | 400 0   | H0 |
| ATOM 1433 HG12 ILE A 92   | -40.097 | -14.118 | 31.890 | 1.00 | 37.96   | H0 |
| ANISOU 1433 HG12 ILE A 92 | 4820    | 5530    | 4070   | -330 | 350 150 | H0 |
| ATOM 1434 HG13 ILE A 92   | -39.758 | -12.568 | 31.882 | 1.00 | 37.87   | H0 |
| ANISOU 1434 HG13 ILE A 92 | 4800    | 5540    | 4050   | -350 | 360 60  | H0 |
| ATOM 1435 HG21 ILE A 92   | -43.602 | -13.851 | 31.338 | 1.00 | 37.57   | H0 |
| ANISOU 1435 HG21 ILE A 92 | 4790    | 5480    | 4000   | -350 | 410 50  | H0 |
| ATOM 1436 HG22 ILE A 92   | -42.988 | -14.010 | 32.793 | 1.00 | 38.10   | H0 |
| ANISOU 1436 HG22 ILE A 92 | 4840    | 5620    | 4010   | -390 | 390 100 | H0 |
| ATOM 1437 HG23 ILE A 92   | -42.432 | -14.891 | 31.596 | 1.00 | 37.76   | H0 |
| ANISOU 1437 HG23 ILE A 92 | 4820    | 5480    | 4040   | -360 | 390 140 | H0 |
| ATOM 1438 HD11 ILE A 92   | -40.909 | -12.411 | 34.001 | 1.00 | 38.69   | H0 |
| ANISOU 1438 HD11 ILE A 92 | 4880    | 5790    | 4030   | -410 | 360 50  | H0 |
| ATOM 1439 HD12 ILE A 92   | -39.548 | -13.228 | 34.052 | 1.00 | 38.96   | H0 |
| ANISOU 1439 HD12 ILE A 92 | 4890    | 5840    | 4070   | -400 | 320 130 | H0 |
| ATOM 1440 HD13 ILE A 92   | -40.936 | -13.999 | 34.020 | 1.00 | 38.83   | H0 |
| ANISOU 1440 HD13 ILE A 92 | 4900    | 5790    | 4060   | -400 | 340 160 | H0 |
| ATOM 1441 N SER A 93      | -39.793 | -11.788 | 28.734 | 1.00 | 37.59   | N0 |
| ANISOU 1441 N SER A 93    | 4860    | 5290    | 4140   | -260 | 420 0   | N0 |
| ATOM 1442 CA SER A 93     | -39.001 | -10.706 | 28.102 | 1.00 | 38.66   | C0 |
| ANISOU 1442 CA SER A 93   | 5020    | 5380    | 4290   | -270 | 450 -50 | C0 |
| ATOM 1443 C SER A 93      | -38.952 | -10.953 | 26.593 | 1.00 | 38.52   | C0 |
| ANISOU 1443 C SER A 93    | 5050    | 5270    | 4320   | -220 | 460 -40 | C0 |
| ATOM 1444 O SER A 93      | -39.092 | -12.115 | 26.178 | 1.00 | 38.81   | O0 |
| ANISOU 1444 O SER A 93    | 5070    | 5290    | 4380   | -200 | 450 10  | O0 |
| ATOM 1445 CB SER A 93     | -37.620 | -10.607 | 28.697 | 1.00 | 38.34   | C0 |
| ANISOU 1445 CB SER A 93   | 4930    | 5390    | 4240   | -310 | 440 -50 | C0 |
| ATOM 1446 OG SER A 93     | -36.786 | -11.645 | 28.207 | 1.00 | 38.48   | O0 |
| ANISOU 1446 OG SER A 93   | 4920    | 5400    | 4300   | -280 | 420 10  | O0 |
| ATOM 1447 H SER A 93      | -39.524 | -12.612 | 28.464 | 1.00 | 37.64   | H0 |
| ANISOU 1447 H SER A 93    | 4860    | 5280    | 4170   | -250 | 410 40  | H0 |
| ATOM 1448 HA SER A 93     | -39.472 | -9.844  | 28.260 | 1.00 | 38.45   | H0 |
| ANISOU 1448 HA SER A 93   | 5020    | 5350    | 4240   | -270 | 470 -90 | H0 |
| ATOM 1449 HB2 SER A 93    | -37.228 | -9.734  | 28.469 | 1.00 | 38.68   | H0 |
| ANISOU 1449 HB2 SER A 93  | 5000    | 5410    | 4290   | -330 | 470 -90 | H0 |
| ATOM 1450 HB3 SER A 93    | -37.682 | -10.670 | 29.676 | 1.00 | 38.83   | H0 |
| ANISOU 1450 HB3 SER A 93  | 4970    | 5520    | 4270   | -340 | 420 -40 | H0 |
| ATOM 1451 N LYS A 94      | -38.804 | -9.879  | 25.825 | 1.00 | 40.25   | N0 |
| ANISOU 1451 N LYS A 94    | 5320    | 5430    | 4540   | -210 | 500 -80 | N0 |
| ATOM 1452 CA LYS A 94     | -38.487 | -9.895  | 24.371 | 1.00 | 43.09   | C0 |
| ANISOU 1452 CA LYS A 94   | 5730    | 5710    | 4940   | -180 | 530 -70 | C0 |
| ATOM 1453 C LYS A 94      | -37.193 | -10.688 | 24.169 | 1.00 | 41.77   | C0 |
| ANISOU 1453 C LYS A 94    | 5520    | 5540    | 4810   | -200 | 520 -50 | C0 |
| ATOM 1454 O LYS A 94      | -36.271 | -10.568 | 24.972 | 1.00 | 39.75   | O0 |
| ANISOU 1454 O LYS A 94    | 5210    | 5350    | 4550   | -240 | 520 -50 | O0 |

|                          |         |         |        |      |       |      |    |
|--------------------------|---------|---------|--------|------|-------|------|----|
| ATOM 1455 CB LYS A 94    | -38.337 | -8.443  | 23.898 | 1.00 | 46.17 | C0   |    |
| ANISOU 1455 CB LYS A 94  | 6200    | 6030    | 5310   | -170 | 580   | -120 | C0 |
| ATOM 1456 CG LYS A 94    | -38.860 | -8.130  | 22.507 | 1.00 | 50.03 | C0   |    |
| ANISOU 1456 CG LYS A 94  | 6770    | 6440    | 5800   | -110 | 610   | -110 | C0 |
| ATOM 1457 CD LYS A 94    | -38.599 | -6.681  | 22.109 | 1.00 | 52.75 | C0   |    |
| ANISOU 1457 CD LYS A 94  | 7210    | 6700    | 6130   | -110 | 670   | -150 | C0 |
| ATOM 1458 CE LYS A 94    | -38.962 | -6.370  | 20.671 | 1.00 | 54.78 | C0   |    |
| ANISOU 1458 CE LYS A 94  | 7560    | 6890    | 6370   | -30  | 700   | -130 | C0 |
| ATOM 1459 NZ LYS A 94    | -40.431 | -6.272  | 20.488 | 1.00 | 56.58 | N0   |    |
| ANISOU 1459 NZ LYS A 94  | 7800    | 7140    | 6560   | 70   | 660   | -120 | N0 |
| ATOM 1460 H LYS A 94     | -38.890 | -9.038  | 26.164 | 1.00 | 40.75 | H0   |    |
| ANISOU 1460 H LYS A 94   | 5410    | 5490    | 4590   | -220 | 520   | -120 | H0 |
| ATOM 1461 HA LYS A 94    | -39.224 | -10.327 | 23.885 | 1.00 | 42.55 | H0   |    |
| ANISOU 1461 HA LYS A 94  | 5670    | 5630    | 4870   | -140 | 520   | -60  | H0 |
| ATOM 1462 HB2 LYS A 94   | -38.803 | -7.862  | 24.534 | 1.00 | 46.52 | H0   |    |
| ANISOU 1462 HB2 LYS A 94 | 6250    | 6090    | 5330   | -180 | 590   | -140 | H0 |
| ATOM 1463 HB3 LYS A 94   | -37.386 | -8.208  | 23.928 | 1.00 | 46.55 | H0   |    |
| ANISOU 1463 HB3 LYS A 94 | 6240    | 6070    | 5370   | -220 | 600   | -130 | H0 |
| ATOM 1464 HG2 LYS A 94   | -38.426 | -8.726  | 21.860 | 1.00 | 49.42 | H0   |    |
| ANISOU 1464 HG2 LYS A 94 | 6680    | 6350    | 5740   | -110 | 600   | -100 | H0 |
| ATOM 1465 HG3 LYS A 94   | -39.825 | -8.303  | 22.481 | 1.00 | 49.49 | H0   |    |
| ANISOU 1465 HG3 LYS A 94 | 6690    | 6400    | 5710   | -60  | 580   | -110 | H0 |
| ATOM 1466 HD2 LYS A 94   | -39.116 | -6.092  | 22.699 | 1.00 | 52.88 | H0   |    |
| ANISOU 1466 HD2 LYS A 94 | 7250    | 6730    | 6120   | -90  | 680   | -170 | H0 |
| ATOM 1467 HD3 LYS A 94   | -37.649 | -6.481  | 22.244 | 1.00 | 52.83 | H0   |    |
| ANISOU 1467 HD3 LYS A 94 | 7220    | 6700    | 6150   | -170 | 700   | -160 | H0 |
| ATOM 1468 HE2 LYS A 94   | -38.552 | -5.525  | 20.405 | 1.00 | 55.11 | H0   |    |
| ANISOU 1468 HE2 LYS A 94 | 7670    | 6860    | 6400   | -40  | 750   | -140 | H0 |
| ATOM 1469 HE3 LYS A 94   | -38.615 | -7.071  | 20.087 | 1.00 | 54.48 | H0   |    |
| ANISOU 1469 HE3 LYS A 94 | 7500    | 6850    | 6350   | -40  | 680   | -110 | H0 |
| ATOM 1470 HZ1 LYS A 94   | -40.818 | -7.072  | 20.671 | 1.00 | 55.72 | H0   |    |
| ANISOU 1470 HZ1 LYS A 94 | 7620    | 7090    | 6450   | 70   | 620   | -110 | H0 |
| ATOM 1471 HZ2 LYS A 94   | -40.620 | -6.040  | 19.632 | 1.00 | 56.22 | H0   |    |
| ANISOU 1471 HZ2 LYS A 94 | 7800    | 7060    | 6490   | 120  | 680   | -100 | H0 |
| ATOM 1472 HZ3 LYS A 94   | -40.770 | -5.644  | 21.048 | 1.00 | 56.30 | H0   |    |
| ANISOU 1472 HZ3 LYS A 94 | 7780    | 7100    | 6510   | 80   | 680   | -130 | H0 |
| ATOM 1473 N PRO A 95     | -37.073 | -11.534 | 23.118 | 1.00 | 41.84 | N0   |    |
| ANISOU 1473 N PRO A 95   | 5540    | 5510    | 4850   | -160 | 530   | -20  | N0 |
| ATOM 1474 CA PRO A 95    | -35.801 | -12.185 | 22.807 | 1.00 | 41.56 | C0   |    |
| ANISOU 1474 CA PRO A 95  | 5470    | 5470    | 4850   | -170 | 540   | 0    | C0 |
| ATOM 1475 C PRO A 95     | -34.708 | -11.137 | 22.539 | 1.00 | 41.60 | C0   |    |
| ANISOU 1475 C PRO A 95   | 5470    | 5470    | 4860   | -210 | 580   | -40  | C0 |
| ATOM 1476 O PRO A 95     | -34.893 | -10.320 | 21.655 | 1.00 | 43.38 | O0   |    |
| ANISOU 1476 O PRO A 95   | 5770    | 5630    | 5080   | -210 | 620   | -70  | O0 |
| ATOM 1477 CB PRO A 95    | -36.065 | -13.017 | 21.539 | 1.00 | 42.04 | C0   |    |
| ANISOU 1477 CB PRO A 95  | 5570    | 5460    | 4940   | -120 | 550   | 20   | C0 |
| ATOM 1478 CG PRO A 95    | -37.576 | -13.065 | 21.376 | 1.00 | 41.99 | C0   |    |
| ANISOU 1478 CG PRO A 95  | 5600    | 5450    | 4900   | -110 | 530   | 10   | C0 |
| ATOM 1479 CD PRO A 95    | -38.142 | -11.910 | 22.180 | 1.00 | 42.39 | C0   |    |
| ANISOU 1479 CD PRO A 95  | 5650    | 5540    | 4920   | -120 | 520   | -20  | C0 |
| ATOM 1480 HA PRO A 95    | -35.538 | -12.781 | 23.552 | 1.00 | 41.87 | H0   |    |
| ANISOU 1480 HA PRO A 95  | 5460    | 5560    | 4900   | -170 | 510   | 30   | H0 |
| ATOM 1481 HB2 PRO A 95   | -35.649 | -12.600 | 20.754 | 1.00 | 41.98 | H0   |    |
| ANISOU 1481 HB2 PRO A 95 | 5590    | 5420    | 4940   | -120 | 580   | 0    | H0 |

|                          |         |         |        |      |       |      |    |
|--------------------------|---------|---------|--------|------|-------|------|----|
| ATOM 1482 HB3 PRO A 95   | -35.702 | -13.923 | 21.639 | 1.00 | 42.06 |      | H0 |
| ANISOU 1482 HB3 PRO A 95 | 5540    | 5470    | 4970   | -110 | 540   | 50   | H0 |
| ATOM 1483 HG2 PRO A 95   | -37.820 | -12.975 | 20.432 | 1.00 | 41.98 |      | H0 |
| ANISOU 1483 HG2 PRO A 95 | 5640    | 5410    | 4900   | -90  | 550   | 0    | H0 |
| ATOM 1484 HG3 PRO A 95   | -37.928 | -13.916 | 21.707 | 1.00 | 42.04 |      | H0 |
| ANISOU 1484 HG3 PRO A 95 | 5590    | 5470    | 4920   | -110 | 510   | 30   | H0 |
| ATOM 1485 HD2 PRO A 95   | -38.370 | -11.161 | 21.599 | 1.00 | 42.12 |      | H0 |
| ANISOU 1485 HD2 PRO A 95 | 5670    | 5470    | 4870   | -110 | 540   | -40  | H0 |
| ATOM 1486 HD3 PRO A 95   | -38.943 | -12.187 | 22.663 | 1.00 | 42.06 |      | H0 |
| ANISOU 1486 HD3 PRO A 95 | 5600    | 5530    | 4860   | -120 | 500   | -10  | H0 |
| ATOM 1487 N GLU A 96     | -33.635 | -11.140 | 23.335 | 1.00 | 40.74 |      | N0 |
| ANISOU 1487 N GLU A 96   | 5280    | 5440    | 4750   | -250 | 570   | -40  | N0 |
| ATOM 1488 CA GLU A 96    | -32.421 | -10.324 | 23.076 | 1.00 | 41.47 |      | C0 |
| ANISOU 1488 CA GLU A 96  | 5350    | 5550    | 4850   | -310 | 620   | -90  | C0 |
| ATOM 1489 C GLU A 96     | -31.493 | -11.175 | 22.201 | 1.00 | 39.57 |      | C0 |
| ANISOU 1489 C GLU A 96   | 5070    | 5310    | 4650   | -270 | 640   | -70  | C0 |
| ATOM 1490 O GLU A 96     | -30.804 | -12.051 | 22.750 | 1.00 | 38.05 |      | O0 |
| ANISOU 1490 O GLU A 96   | 4780    | 5200    | 4470   | -240 | 610   | -30  | O0 |
| ATOM 1491 CB GLU A 96    | -31.759 | -9.856  | 24.380 | 1.00 | 43.79 |      | C0 |
| ANISOU 1491 CB GLU A 96  | 5560    | 5960    | 5110   | -380 | 600   | -120 | C0 |
| ATOM 1492 CG GLU A 96    | -30.637 | -8.843  | 24.153 | 1.00 | 46.16 |      | C0 |
| ANISOU 1492 CG GLU A 96  | 5850    | 6290    | 5400   | -470 | 660   | -190 | C0 |
| ATOM 1493 CD GLU A 96    | -29.876 | -8.357  | 25.384 | 1.00 | 48.85 |      | C0 |
| ANISOU 1493 CD GLU A 96  | 6090    | 6770    | 5700   | -570 | 640   | -240 | C0 |
| ATOM 1494 OE1 GLU A 96   | -29.040 | -7.422  | 25.243 | 1.00 | 50.18 |      | O0 |
| ANISOU 1494 OE1 GLU A 96 | 6250    | 6960    | 5860   | -670 | 700   | -310 | O0 |
| ATOM 1495 OE2 GLU A 96   | -30.109 | -8.906  | 26.481 | 1.00 | 49.96 |      | O0 |
| ANISOU 1495 OE2 GLU A 96 | 6170    | 7000    | 5810   | -540 | 570   | -200 | O0 |
| ATOM 1496 H GLU A 96     | -33.584 | -11.647 | 24.091 | 1.00 | 41.21 |      | H0 |
| ANISOU 1496 H GLU A 96   | 5290    | 5560    | 4810   | -240 | 540   | -20  | H0 |
| ATOM 1497 HA GLU A 96    | -32.690 | -9.528  | 22.562 | 1.00 | 41.28 |      | H0 |
| ANISOU 1497 HA GLU A 96  | 5400    | 5470    | 4820   | -330 | 660   | -120 | H0 |
| ATOM 1498 HB2 GLU A 96   | -32.443 | -9.452  | 24.953 | 1.00 | 43.62 |      | H0 |
| ANISOU 1498 HB2 GLU A 96 | 5570    | 5940    | 5060   | -390 | 590   | -130 | H0 |
| ATOM 1499 HB3 GLU A 96   | -31.395 | -10.637 | 24.848 | 1.00 | 43.91 |      | H0 |
| ANISOU 1499 HB3 GLU A 96 | 5510    | 6050    | 5130   | -350 | 560   | -80  | H0 |
| ATOM 1500 HG2 GLU A 96   | -29.985 | -9.236  | 23.535 | 1.00 | 46.33 |      | H0 |
| ANISOU 1500 HG2 GLU A 96 | 5840    | 6310    | 5450   | -460 | 680   | -180 | H0 |
| ATOM 1501 HG3 GLU A 96   | -31.017 | -8.057  | 23.706 | 1.00 | 46.09 |      | H0 |
| ANISOU 1501 HG3 GLU A 96 | 5930    | 6200    | 5390   | -500 | 710   | -220 | H0 |
| ATOM 1502 N VAL A 97     | -31.512 | -10.959 | 20.882 | 1.00 | 37.91 |      | N0 |
| ANISOU 1502 N VAL A 97   | 4940    | 5010    | 4460   | -260 | 690   | -80  | N0 |
| ATOM 1503 CA VAL A 97    | -30.647 | -11.714 | 19.925 | 1.00 | 37.66 |      | C0 |
| ANISOU 1503 CA VAL A 97  | 4880    | 4970    | 4460   | -230 | 730   | -70  | C0 |
| ATOM 1504 C VAL A 97     | -29.237 | -11.135 | 20.033 | 1.00 | 36.98 |      | C0 |
| ANISOU 1504 C VAL A 97   | 4710    | 4960    | 4380   | -300 | 770   | -110 | C0 |
| ATOM 1505 O VAL A 97     | -29.091 | -9.938  | 19.786 | 1.00 | 37.98 |      | O0 |
| ANISOU 1505 O VAL A 97   | 4890    | 5060    | 4480   | -380 | 820   | -160 | O0 |
| ATOM 1506 CB VAL A 97    | -31.181 | -11.667 | 18.481 | 1.00 | 37.76 |      | C0 |
| ANISOU 1506 CB VAL A 97  | 5000    | 4870    | 4480   | -200 | 770   | -70  | C0 |
| ATOM 1507 CG1 VAL A 97   | -30.318 | -12.509 | 17.545 | 1.00 | 38.37 |      | C0 |
| ANISOU 1507 CG1 VAL A 97 | 5050    | 4940    | 4590   | -170 | 810   | -70  | C0 |
| ATOM 1508 CG2 VAL A 97   | -32.637 | -12.106 | 18.402 | 1.00 | 37.20 |      | C0 |
| ANISOU 1508 CG2 VAL A 97 | 4990    | 4750    | 4390   | -150 | 730   | -50  | C0 |

|                           |         |         |        |      |       |      |    |
|---------------------------|---------|---------|--------|------|-------|------|----|
| ATOM 1509 H VAL A 97      | -32.041 | -10.330 | 20.489 | 1.00 | 37.96 |      | H0 |
| ANISOU 1509 H VAL A 97    | 5020    | 4960    | 4450   | -270 | 720   | -100 | H0 |
| ATOM 1510 HA VAL A 97     | -30.620 | -12.645 | 20.210 | 1.00 | 37.54 |      | H0 |
| ANISOU 1510 HA VAL A 97   | 4820    | 4980    | 4470   | -180 | 690   | -30  | H0 |
| ATOM 1511 HB VAL A 97     | -31.130 | -10.728 | 18.176 | 1.00 | 37.86 |      | H0 |
| ANISOU 1511 HB VAL A 97   | 5060    | 4860    | 4470   | -240 | 810   | -100 | H0 |
| ATOM 1512 HG11 VAL A 97   | -29.539 | -11.995 | 17.269 | 1.00 | 38.71 |      | H0 |
| ANISOU 1512 HG11 VAL A 97 | 5070    | 5000    | 4630   | -210 | 850   | -100 | H0 |
| ATOM 1513 HG12 VAL A 97   | -30.836 | -12.758 | 16.761 | 1.00 | 38.06 |      | H0 |
| ANISOU 1513 HG12 VAL A 97 | 5070    | 4840    | 4550   | -140 | 820   | -70  | H0 |
| ATOM 1514 HG13 VAL A 97   | -30.027 | -13.314 | 18.008 | 1.00 | 38.43 |      | H0 |
| ANISOU 1514 HG13 VAL A 97 | 4990    | 4990    | 4620   | -130 | 780   | -40  | H0 |
| ATOM 1515 HG21 VAL A 97   | -32.739 | -12.973 | 18.831 | 1.00 | 37.12 |      | H0 |
| ANISOU 1515 HG21 VAL A 97 | 4940    | 4760    | 4400   | -120 | 690   | -20  | H0 |
| ATOM 1516 HG22 VAL A 97   | -32.907 | -12.173 | 17.469 | 1.00 | 37.10 |      | H0 |
| ANISOU 1516 HG22 VAL A 97 | 5040    | 4690    | 4370   | -130 | 750   | -50  | H0 |
| ATOM 1517 HG23 VAL A 97   | -33.200 | -11.454 | 18.854 | 1.00 | 37.03 |      | H0 |
| ANISOU 1517 HG23 VAL A 97 | 5000    | 4730    | 4340   | -170 | 710   | -60  | H0 |
| ATOM 1518 N LEU A 98      | -28.256 | -11.947 | 20.431 | 1.00 | 36.79 |      | N0 |
| ANISOU 1518 N LEU A 98    | 4560    | 5040    | 4380   | -260 | 750   | -90  | N0 |
| ATOM 1519 CA LEU A 98     | -26.869 | -11.490 | 20.725 | 1.00 | 37.57 |      | C0 |
| ANISOU 1519 CA LEU A 98   | 4540    | 5260    | 4480   | -330 | 770   | -140 | C0 |
| ATOM 1520 C LEU A 98      | -26.000 | -11.537 | 19.457 | 1.00 | 38.13 |      | C0 |
| ANISOU 1520 C LEU A 98    | 4600    | 5310    | 4580   | -330 | 860   | -170 | C0 |
| ATOM 1521 O LEU A 98      | -24.938 | -10.884 | 19.456 | 1.00 | 39.10 |      | O0 |
| ANISOU 1521 O LEU A 98    | 4640    | 5520    | 4690   | -420 | 900   | -220 | O0 |
| ATOM 1522 CB LEU A 98     | -26.279 | -12.373 | 21.830 | 1.00 | 38.05 |      | C0 |
| ANISOU 1522 CB LEU A 98   | 4450    | 5470    | 4540   | -270 | 700   | -90  | C0 |
| ATOM 1523 CG LEU A 98     | -27.025 | -12.354 | 23.167 | 1.00 | 37.87 |      | C0 |
| ANISOU 1523 CG LEU A 98   | 4430    | 5490    | 4470   | -270 | 630   | -70  | C0 |
| ATOM 1524 CD1 LEU A 98    | -26.530 | -13.462 | 24.085 | 1.00 | 38.76 |      | C0 |
| ANISOU 1524 CD1 LEU A 98  | 4430    | 5720    | 4580   | -180 | 560   | 0    | C0 |
| ATOM 1525 CD2 LEU A 98    | -26.880 | -11.005 | 23.854 | 1.00 | 38.26 |      | C0 |
| ANISOU 1525 CD2 LEU A 98  | 4470    | 5600    | 4470   | -410 | 640   | -140 | C0 |
| ATOM 1526 H LEU A 98      | -28.378 | -12.843 | 20.542 | 1.00 | 36.84 |      | H0 |
| ANISOU 1526 H LEU A 98    | 4550    | 5040    | 4410   | -190 | 720   | -50  | H0 |
| ATOM 1527 HA LEU A 98     | -26.911 | -10.558 | 21.041 | 1.00 | 37.73 |      | H0 |
| ANISOU 1527 HA LEU A 98   | 4580    | 5290    | 4470   | -410 | 790   | -180 | H0 |
| ATOM 1528 HB2 LEU A 98    | -26.252 | -13.295 | 21.504 | 1.00 | 38.08 |      | H0 |
| ANISOU 1528 HB2 LEU A 98  | 4450    | 5440    | 4570   | -180 | 700   | -50  | H0 |
| ATOM 1529 HB3 LEU A 98    | -25.356 | -12.091 | 21.988 | 1.00 | 38.87 |      | H0 |
| ANISOU 1529 HB3 LEU A 98  | 4460    | 5670    | 4630   | -310 | 720   | -130 | H0 |
| ATOM 1530 HG LEU A 98     | -27.985 | -12.508 | 22.988 | 1.00 | 37.18 |      | H0 |
| ANISOU 1530 HG LEU A 98   | 4430    | 5300    | 4390   | -250 | 620   | -40  | H0 |
| ATOM 1531 HD11 LEU A 98   | -26.676 | -14.326 | 23.661 | 1.00 | 38.54 |      | H0 |
| ANISOU 1531 HD11 LEU A 98 | 4430    | 5630    | 4590   | -90  | 560   | 50   | H0 |
| ATOM 1532 HD12 LEU A 98   | -27.018 | -13.429 | 24.927 | 1.00 | 38.56 |      | H0 |
| ANISOU 1532 HD12 LEU A 98 | 4410    | 5720    | 4520   | -180 | 510   | 20   | H0 |
| ATOM 1533 HD13 LEU A 98   | -25.580 | -13.342 | 24.257 | 1.00 | 39.50 |      | H0 |
| ANISOU 1533 HD13 LEU A 98 | 4410    | 5930    | 4670   | -190 | 560   | -20  | H0 |
| ATOM 1534 HD21 LEU A 98   | -25.937 | -10.781 | 23.932 | 1.00 | 39.03 |      | H0 |
| ANISOU 1534 HD21 LEU A 98 | 4470    | 5800    | 4560   | -450 | 650   | -180 | H0 |
| ATOM 1535 HD22 LEU A 98   | -27.277 | -11.049 | 24.742 | 1.00 | 38.19 |      | H0 |
| ANISOU 1535 HD22 LEU A 98 | 4440    | 5630    | 4430   | -410 | 590   | -130 | H0 |

|                           |         |         |        |      |       |      |    |
|---------------------------|---------|---------|--------|------|-------|------|----|
| ATOM 1536 HD23 LEU A 98   | -27.334 | -10.323 | 23.331 | 1.00 | 37.85 | H0   |    |
| ANISOU 1536 HD23 LEU A 98 | 4510    | 5450    | 4420   | -450 | 680   | -180 | H0 |
| ATOM 1537 N THR A 99      | -26.440 | -12.245 | 18.410 | 1.00 | 37.17 | N0   |    |
| ANISOU 1537 N THR A 99    | 4560    | 5080    | 4480   | -260 | 880   | -140 | N0 |
| ATOM 1538 CA THR A 99     | -25.587 | -12.691 | 17.276 | 1.00 | 37.70 | C0   |    |
| ANISOU 1538 CA THR A 99   | 4600    | 5140    | 4580   | -230 | 950   | -150 | C0 |
| ATOM 1539 C THR A 99      | -26.041 | -12.063 | 15.958 | 1.00 | 37.85 | C0   |    |
| ANISOU 1539 C THR A 99    | 4770    | 5030    | 4580   | -270 | 1020  | -180 | C0 |
| ATOM 1540 O THR A 99      | -27.197 | -11.676 | 15.809 | 1.00 | 36.84 | O0   |    |
| ANISOU 1540 O THR A 99    | 4760    | 4810    | 4420   | -270 | 1000  | -160 | O0 |
| ATOM 1541 CB THR A 99     | -25.598 | -14.222 | 17.162 | 1.00 | 36.99 | C0   |    |
| ANISOU 1541 CB THR A 99   | 4490    | 5030    | 4530   | -90  | 920   | -100 | C0 |
| ATOM 1542 OG1 THR A 99    | -26.949 | -14.660 | 17.297 | 1.00 | 35.28 | O0   |    |
| ANISOU 1542 OG1 THR A 99  | 4380    | 4720    | 4310   | -50  | 870   | -50  | O0 |
| ATOM 1543 CG2 THR A 99    | -24.729 | -14.904 | 18.196 | 1.00 | 37.86 | C0   |    |
| ANISOU 1543 CG2 THR A 99  | 4440    | 5280    | 4660   | -30  | 870   | -60  | C0 |
| ATOM 1544 H THR A 99      | -27.308 | -12.503 | 18.312 | 1.00 | 36.68 | H0   |    |
| ANISOU 1544 H THR A 99    | 4570    | 4950    | 4420   | -220 | 850   | -110 | H0 |
| ATOM 1545 HA THR A 99     | -24.666 | -12.401 | 17.461 | 1.00 | 38.39 | H0   |    |
| ANISOU 1545 HA THR A 99   | 4600    | 5320    | 4670   | -270 | 970   | -180 | H0 |
| ATOM 1546 HB THR A 99     | -25.272 | -14.467 | 16.263 | 1.00 | 37.21 | H0   |    |
| ANISOU 1546 HB THR A 99   | 4530    | 5030    | 4580   | -70  | 970   | -110 | H0 |
| ATOM 1547 HG21 THR A 99   | -23.805 | -14.915 | 17.889 | 1.00 | 38.59 | H0   |    |
| ANISOU 1547 HG21 THR A 99 | 4450    | 5440    | 4770   | -20  | 910   | -90  | H0 |
| ATOM 1548 HG22 THR A 99   | -25.037 | -15.818 | 18.328 | 1.00 | 37.76 | H0   |    |
| ANISOU 1548 HG22 THR A 99 | 4440    | 5230    | 4670   | 60   | 850   | -20  | H0 |
| ATOM 1549 HG23 THR A 99   | -24.784 | -14.419 | 19.039 | 1.00 | 37.85 | H0   |    |
| ANISOU 1549 HG23 THR A 99 | 4400    | 5350    | 4630   | -70  | 830   | -70  | H0 |
| ATOM 1550 N PRO A 100     | -25.149 | -11.971 | 14.941 | 1.00 | 38.88 | N0   |    |
| ANISOU 1550 N PRO A 100   | 4890    | 5170    | 4720   | -300 | 1110  | -210 | N0 |
| ATOM 1551 CA PRO A 100    | -25.550 | -11.529 | 13.604 | 1.00 | 38.69 | C0   |    |
| ANISOU 1551 CA PRO A 100  | 5010    | 5030    | 4660   | -320 | 1170  | -230 | C0 |
| ATOM 1552 C PRO A 100     | -26.754 | -12.337 | 13.095 | 1.00 | 37.99 | C0   |    |
| ANISOU 1552 C PRO A 100   | 5020    | 4840    | 4570   | -230 | 1130  | -190 | C0 |
| ATOM 1553 O PRO A 100     | -26.778 | -13.536 | 13.272 | 1.00 | 38.04 | O0   |    |
| ANISOU 1553 O PRO A 100   | 4980    | 4860    | 4620   | -140 | 1100  | -160 | O0 |
| ATOM 1554 CB PRO A 100    | -24.301 | -11.784 | 12.741 | 1.00 | 39.85 | C0   |    |
| ANISOU 1554 CB PRO A 100  | 5090    | 5220    | 4830   | -330 | 1260  | -260 | C0 |
| ATOM 1555 CG PRO A 100    | -23.154 | -11.715 | 13.731 | 1.00 | 40.76 | C0   |    |
| ANISOU 1555 CG PRO A 100  | 5020    | 5500    | 4970   | -370 | 1260  | -290 | C0 |
| ATOM 1556 CD PRO A 100    | -23.712 | -12.278 | 15.024 | 1.00 | 39.79 | C0   |    |
| ANISOU 1556 CD PRO A 100  | 4840    | 5420    | 4860   | -300 | 1140  | -240 | C0 |
| ATOM 1557 HA PRO A 100    | -25.758 | -10.561 | 13.619 | 1.00 | 38.77 | H0   |    |
| ANISOU 1557 HA PRO A 100  | 5080    | 5010    | 4640   | -390 | 1200  | -240 | H0 |
| ATOM 1558 HB2 PRO A 100   | -24.341 | -12.666 | 12.313 | 1.00 | 39.78 | H0   |    |
| ANISOU 1558 HB2 PRO A 100 | 5080    | 5200    | 4840   | -260 | 1260  | -250 | H0 |
| ATOM 1559 HB3 PRO A 100   | -24.206 | -11.097 | 12.047 | 1.00 | 40.05 | H0   |    |
| ANISOU 1559 HB3 PRO A 100 | 5180    | 5210    | 4820   | -400 | 1330  | -290 | H0 |
| ATOM 1560 HG2 PRO A 100   | -22.397 | -12.250 | 13.422 | 1.00 | 41.27 | H0   |    |
| ANISOU 1560 HG2 PRO A 100 | 5000    | 5620    | 5060   | -330 | 1290  | -300 | H0 |
| ATOM 1561 HG3 PRO A 100   | -22.857 | -10.790 | 13.855 | 1.00 | 41.00 | H0   |    |
| ANISOU 1561 HG3 PRO A 100 | 5050    | 5550    | 4980   | -470 | 1290  | -330 | H0 |
| ATOM 1562 HD2 PRO A 100   | -23.562 | -13.239 | 15.083 | 1.00 | 40.05 | H0   |    |
| ANISOU 1562 HD2 PRO A 100 | 4820    | 5470    | 4930   | -210 | 1120  | -210 | H0 |

|                            |         |         |        |      |       |      |    |
|----------------------------|---------|---------|--------|------|-------|------|----|
| ATOM 1563 HD3 PRO A 100    | -23.306 | -11.845 | 15.798 | 1.00 | 40.31 | H0   |    |
| ANISOU 1563 HD3 PRO A 100  | 4830    | 5570    | 4920   | -350 | 1120  | -260 | H0 |
| ATOM 1564 N GLN A 101      | -27.728 | -11.662 | 12.487 | 1.00 | 37.60 | N0   |    |
| ANISOU 1564 N GLN A 101    | 5110    | 4700    | 4470   | -240 | 1140  | -180 | N0 |
| ATOM 1565 CA GLN A 101     | -28.998 | -12.274 | 12.022 | 1.00 | 37.82 | C0   |    |
| ANISOU 1565 CA GLN A 101   | 5230    | 4660    | 4480   | -180 | 1090  | -150 | C0 |
| ATOM 1566 C GLN A 101      | -28.793 | -12.873 | 10.620 | 1.00 | 37.60 | C0   |    |
| ANISOU 1566 C GLN A 101    | 5250    | 4600    | 4440   | -150 | 1150  | -170 | C0 |
| ATOM 1567 O GLN A 101      | -29.424 | -12.393 | 9.659  | 1.00 | 36.88 | O0   |    |
| ANISOU 1567 O GLN A 101    | 5280    | 4450    | 4280   | -150 | 1170  | -170 | O0 |
| ATOM 1568 CB GLN A 101     | -30.109 | -11.223 | 12.090 | 1.00 | 38.27 | C0   |    |
| ANISOU 1568 CB GLN A 101   | 5390    | 4670    | 4480   | -190 | 1060  | -140 | C0 |
| ATOM 1569 CG GLN A 101     | -30.500 | -10.844 | 13.514 | 1.00 | 39.09 | C0   |    |
| ANISOU 1569 CG GLN A 101   | 5450    | 4810    | 4590   | -210 | 1000  | -130 | C0 |
| ATOM 1570 CD GLN A 101     | -31.362 | -11.903 | 14.160 | 1.00 | 39.88 | C0   |    |
| ANISOU 1570 CD GLN A 101   | 5500    | 4930    | 4710   | -140 | 920   | -100 | C0 |
| ATOM 1571 OE1 GLN A 101    | -30.974 | -13.068 | 14.268 | 1.00 | 40.69 | O0   |    |
| ANISOU 1571 OE1 GLN A 101  | 5540    | 5060    | 4860   | -110 | 910   | -90  | O0 |
| ATOM 1572 NE2 GLN A 101    | -32.554 | -11.512 | 14.585 | 1.00 | 40.17 | N0   |    |
| ANISOU 1572 NE2 GLN A 101  | 5590    | 4960    | 4720   | -130 | 870   | -80  | N0 |
| ATOM 1573 H GLN A 101      | -27.666 | -10.770 | 12.312 | 1.00 | 37.98 | H0   |    |
| ANISOU 1573 H GLN A 101    | 5210    | 4730    | 4490   | -300 | 1170  | -190 | H0 |
| ATOM 1574 HA GLN A 101     | -29.224 | -13.007 | 12.637 | 1.00 | 37.46 | H0   |    |
| ANISOU 1574 HA GLN A 101   | 5130    | 4640    | 4460   | -140 | 1040  | -130 | H0 |
| ATOM 1575 HB2 GLN A 101    | -29.810 | -10.420 | 11.614 | 1.00 | 38.70 | H0   |    |
| ANISOU 1575 HB2 GLN A 101  | 5500    | 4700    | 4500   | -230 | 1120  | -150 | H0 |
| ATOM 1576 HB3 GLN A 101    | -30.897 | -11.572 | 11.625 | 1.00 | 38.07 | H0   |    |
| ANISOU 1576 HB3 GLN A 101  | 5420    | 4620    | 4430   | -150 | 1040  | -130 | H0 |
| ATOM 1577 HG2 GLN A 101    | -29.689 | -10.718 | 14.051 | 1.00 | 39.42 | H0   |    |
| ANISOU 1577 HG2 GLN A 101  | 5410    | 4900    | 4660   | -240 | 1020  | -140 | H0 |
| ATOM 1578 HG3 GLN A 101    | -30.987 | -9.992  | 13.500 | 1.00 | 39.09 | H0   |    |
| ANISOU 1578 HG3 GLN A 101  | 5520    | 4780    | 4560   | -220 | 1010  | -130 | H0 |
| ATOM 1579 HE21 GLN A 101   | -33.081 | -12.082 | 15.008 | 1.00 | 39.66 | H0   |    |
| ANISOU 1579 HE21 GLN A 101 | 5500    | 4910    | 4660   | -110 | 820   | -70  | H0 |
| ATOM 1580 HE22 GLN A 101   | -32.826 | -10.682 | 14.446 | 1.00 | 39.98 | H0   |    |
| ANISOU 1580 HE22 GLN A 101 | 5620    | 4910    | 4660   | -140 | 880   | -90  | H0 |
| ATOM 1581 N LEU A 102      | -27.951 | -13.902 | 10.521 | 1.00 | 37.92 | N0   |    |
| ANISOU 1581 N LEU A 102    | 5210    | 4670    | 4530   | -110 | 1170  | -180 | N0 |
| ATOM 1582 CA LEU A 102     | -27.636 | -14.615 | 9.256  | 1.00 | 38.87 | C0   |    |
| ANISOU 1582 CA LEU A 102   | 5370    | 4750    | 4640   | -80  | 1240  | -210 | C0 |
| ATOM 1583 C LEU A 102      | -28.054 | -16.079 | 9.387  | 1.00 | 38.35 | C0   |    |
| ANISOU 1583 C LEU A 102    | 5300    | 4660    | 4620   | -10  | 1210  | -200 | C0 |
| ATOM 1584 O LEU A 102      | -27.769 | -16.689 | 10.440 | 1.00 | 39.54 | O0   |    |
| ANISOU 1584 O LEU A 102    | 5360    | 4840    | 4830   | 40   | 1170  | -170 | O0 |
| ATOM 1585 CB LEU A 102     | -26.133 | -14.520 | 8.972  | 1.00 | 40.51 | C0   |    |
| ANISOU 1585 CB LEU A 102   | 5490    | 5020    | 4880   | -110 | 1330  | -240 | C0 |
| ATOM 1586 CG LEU A 102     | -25.597 | -13.122 | 8.679  | 1.00 | 41.23 | C0   |    |
| ANISOU 1586 CG LEU A 102   | 5610    | 5130    | 4930   | -210 | 1390  | -260 | C0 |
| ATOM 1587 CD1 LEU A 102    | -24.089 | -13.150 | 8.505  | 1.00 | 42.57 | C0   |    |
| ANISOU 1587 CD1 LEU A 102  | 5660    | 5380    | 5130   | -240 | 1480  | -310 | C0 |
| ATOM 1588 CD2 LEU A 102    | -26.266 | -12.535 | 7.450  | 1.00 | 41.83 | C0   |    |
| ANISOU 1588 CD2 LEU A 102  | 5850    | 5120    | 4920   | -230 | 1430  | -260 | C0 |
| ATOM 1589 H LEU A 102      | -27.515 | -14.244 | 11.244 | 1.00 | 38.16 | H0   |    |
| ANISOU 1589 H LEU A 102    | 5160    | 4740    | 4600   | -90  | 1160  | -170 | H0 |



|                            |         |         |       |      |       |      |    |
|----------------------------|---------|---------|-------|------|-------|------|----|
| ATOM 1590 HA LEU A 102     | -28.142 | -14.200 | 8.522 | 1.00 | 38.74 | H0   |    |
| ANISOU 1590 HA LEU A 102   | 5450    | 4700    | 4570  | -100 | 1260  | -210 | H0 |
| ATOM 1591 HB2 LEU A 102    | -25.652 | -14.878 | 9.745 | 1.00 | 40.56 | H0   |    |
| ANISOU 1591 HB2 LEU A 102  | 5400    | 5080    | 4930  | -80  | 1310  | -230 | H0 |
| ATOM 1592 HB3 LEU A 102    | -25.929 | -15.095 | 8.208 | 1.00 | 40.77 | H0   |    |
| ANISOU 1592 HB3 LEU A 102  | 5550    | 5030    | 4920  | -80  | 1370  | -260 | H0 |
| ATOM 1593 HG LEU A 102     | -25.808 | -12.542 | 9.451 | 1.00 | 41.04 | H0   |    |
| ANISOU 1593 HG LEU A 102   | 5570    | 5120    | 4910  | -240 | 1350  | -250 | H0 |
| ATOM 1594 HD11 LEU A 102   | -23.679 | -13.550 | 9.291 | 1.00 | 42.60 | H0   |    |
| ANISOU 1594 HD11 LEU A 102 | 5550    | 5450    | 5180  | -210 | 1450  | -300 | H0 |
| ATOM 1595 HD12 LEU A 102   | -23.757 | -12.242 | 8.393 | 1.00 | 42.81 | H0   |    |
| ANISOU 1595 HD12 LEU A 102 | 5710    | 5430    | 5140  | -320 | 1530  | -320 | H0 |
| ATOM 1596 HD13 LEU A 102   | -23.862 | -13.676 | 7.718 | 1.00 | 42.84 | H0   |    |
| ANISOU 1596 HD13 LEU A 102 | 5710    | 5400    | 5170  | -210 | 1530  | -320 | H0 |
| ATOM 1597 HD21 LEU A 102   | -26.423 | -13.239 | 6.796 | 1.00 | 41.71 | H0   |    |
| ANISOU 1597 HD21 LEU A 102 | 5860    | 5090    | 4900  | -190 | 1450  | -270 | H0 |
| ATOM 1598 HD22 LEU A 102   | -25.691 | -11.855 | 7.060 | 1.00 | 42.20 | H0   |    |
| ANISOU 1598 HD22 LEU A 102 | 5910    | 5180    | 4950  | -300 | 1500  | -280 | H0 |
| ATOM 1599 HD23 LEU A 102   | -27.114 | -12.134 | 7.704 | 1.00 | 41.11 | H0   |    |
| ANISOU 1599 HD23 LEU A 102 | 5820    | 5000    | 4800  | -230 | 1380  | -240 | H0 |
| ATOM 1600 N ALA A 103      | -28.699 | -16.610 | 8.347 | 1.00 | 37.76 | N0   |    |
| ANISOU 1600 N ALA A 103    | 5320    | 4520    | 4510  | 10   | 1220  | -220 | N0 |
| ATOM 1601 CA ALA A 103     | -28.990 | -18.048 | 8.169 | 1.00 | 37.29 | C0   |    |
| ANISOU 1601 CA ALA A 103   | 5280    | 4410    | 4480  | 60   | 1220  | -230 | C0 |
| ATOM 1602 C ALA A 103      | -27.944 | -18.649 | 7.229 | 1.00 | 38.54 | C0   |    |
| ANISOU 1602 C ALA A 103    | 5430    | 4550    | 4660  | 90   | 1320  | -280 | C0 |
| ATOM 1603 O ALA A 103      | -27.421 | -17.915 | 6.358 | 1.00 | 38.73 | O0   |    |
| ANISOU 1603 O ALA A 103    | 5480    | 4600    | 4640  | 50   | 1390  | -310 | O0 |
| ATOM 1604 CB ALA A 103     | -30.386 | -18.224 | 7.631 | 1.00 | 36.96 | C0   |    |
| ANISOU 1604 CB ALA A 103   | 5340    | 4330    | 4370  | 30   | 1180  | -250 | C0 |
| ATOM 1605 H ALA A 103      | -29.012 | -16.109 | 7.653 | 1.00 | 37.73 | H0   |    |
| ANISOU 1605 H ALA A 103    | 5380    | 4510    | 4450  | -20  | 1240  | -230 | H0 |
| ATOM 1606 HA ALA A 103     | -28.925 | -18.496 | 9.045 | 1.00 | 37.41 | H0   |    |
| ANISOU 1606 HA ALA A 103   | 5240    | 4430    | 4540  | 90   | 1190  | -210 | H0 |
| ATOM 1607 HB1 ALA A 103    | -30.583 | -19.172 | 7.542 | 1.00 | 37.20 | H0   |    |
| ANISOU 1607 HB1 ALA A 103  | 5390    | 4320    | 4420  | 50   | 1190  | -270 | H0 |
| ATOM 1608 HB2 ALA A 103    | -31.024 | -17.819 | 8.243 | 1.00 | 36.43 | H0   |    |
| ANISOU 1608 HB2 ALA A 103  | 5270    | 4280    | 4290  | 20   | 1120  | -220 | H0 |
| ATOM 1609 HB3 ALA A 103    | -30.456 | -17.796 | 6.762 | 1.00 | 37.12 | H0   |    |
| ANISOU 1609 HB3 ALA A 103  | 5410    | 4350    | 4340  | 10   | 1210  | -270 | H0 |
| ATOM 1610 N ARG A 104      | -27.634 | -19.932 | 7.415 | 1.00 | 38.83 | N0   |    |
| ANISOU 1610 N ARG A 104    | 5450    | 4550    | 4760  | 160  | 1350  | -280 | N0 |
| ATOM 1611 CA ARG A 104     | -26.807 | -20.725 | 6.473 | 1.00 | 40.32 | C0   |    |
| ANISOU 1611 CA ARG A 104   | 5650    | 4700    | 4970  | 210  | 1450  | -330 | C0 |
| ATOM 1612 C ARG A 104      | -27.776 | -21.449 | 5.535 | 1.00 | 40.11 | C0   |    |
| ANISOU 1612 C ARG A 104    | 5760    | 4590    | 4890  | 180  | 1470  | -380 | C0 |
| ATOM 1613 O ARG A 104      | -28.678 | -22.138 | 6.049 | 1.00 | 39.21 | O0   |    |
| ANISOU 1613 O ARG A 104    | 5680    | 4420    | 4790  | 180  | 1410  | -370 | O0 |
| ATOM 1614 CB ARG A 104     | -25.891 | -21.670 | 7.256 | 1.00 | 41.34 | C0   |    |
| ANISOU 1614 CB ARG A 104   | 5680    | 4830    | 5190  | 320  | 1470  | -310 | C0 |
| ATOM 1615 CG ARG A 104     | -24.726 | -22.225 | 6.457 | 1.00 | 43.16 | C0   |    |
| ANISOU 1615 CG ARG A 104   | 5880    | 5070    | 5450  | 390  | 1590  | -360 | C0 |
| ATOM 1616 CD ARG A 104     | -23.612 | -21.222 | 6.224 | 1.00 | 43.52 | C0   |    |
| ANISOU 1616 CD ARG A 104   | 5820    | 5230    | 5490  | 360  | 1630  | -370 | C0 |

|                            |         |         |       |      |       |      |    |
|----------------------------|---------|---------|-------|------|-------|------|----|
| ATOM 1617 NE ARG A 104     | -22.511 | -21.873 | 5.528 | 1.00 | 44.54 | N0   |    |
| ANISOU 1617 NE ARG A 104   | 5900    | 5370    | 5650  | 430  | 1750  | -420 | N0 |
| ATOM 1618 CZ ARG A 104     | -21.528 | -21.252 | 4.882 | 1.00 | 45.01 | C0   |    |
| ANISOU 1618 CZ ARG A 104   | 5890    | 5520    | 5690  | 400  | 1830  | -460 | C0 |
| ATOM 1619 NH1 ARG A 104    | -21.481 | -19.931 | 4.829 | 1.00 | 44.21 | N0   |    |
| ANISOU 1619 NH1 ARG A 104  | 5770    | 5490    | 5540  | 280  | 1810  | -460 | N0 |
| ATOM 1620 NH2 ARG A 104    | -20.589 | -21.967 | 4.288 | 1.00 | 46.37 | N0   |    |
| ANISOU 1620 NH2 ARG A 104  | 6020    | 5700    | 5900  | 480  | 1930  | -510 | N0 |
| ATOM 1621 H ARG A 104      | -27.918 | -20.404 | 8.141 | 1.00 | 38.83 | H0   |    |
| ANISOU 1621 H ARG A 104    | 5430    | 4530    | 4790  | 190  | 1310  | -260 | H0 |
| ATOM 1622 HA ARG A 104     | -26.252 | -20.108 | 5.944 | 1.00 | 40.45 | H0   |    |
| ANISOU 1622 HA ARG A 104   | 5650    | 4760    | 4960  | 180  | 1500  | -360 | H0 |
| ATOM 1623 HB2 ARG A 104    | -25.538 | -21.187 | 8.032 | 1.00 | 41.21 | H0   |    |
| ANISOU 1623 HB2 ARG A 104  | 5580    | 4890    | 5190  | 330  | 1430  | -270 | H0 |
| ATOM 1624 HB3 ARG A 104    | -26.429 | -22.418 | 7.589 | 1.00 | 41.39 | H0   |    |
| ANISOU 1624 HB3 ARG A 104  | 5730    | 4780    | 5210  | 350  | 1450  | -290 | H0 |
| ATOM 1625 HG2 ARG A 104    | -24.356 | -23.001 | 6.930 | 1.00 | 43.59 | H0   |    |
| ANISOU 1625 HG2 ARG A 104  | 5900    | 5100    | 5560  | 480  | 1600  | -330 | H0 |
| ATOM 1626 HG3 ARG A 104    | -25.055 | -22.537 | 5.587 | 1.00 | 43.23 | H0   |    |
| ANISOU 1626 HG3 ARG A 104  | 5980    | 5020    | 5430  | 370  | 1630  | -400 | H0 |
| ATOM 1627 HD2 ARG A 104    | -23.951 | -20.475 | 5.687 | 1.00 | 43.02 | H0   |    |
| ANISOU 1627 HD2 ARG A 104  | 5810    | 5170    | 5360  | 270  | 1640  | -390 | H0 |
| ATOM 1628 HD3 ARG A 104    | -23.299 | -20.869 | 7.084 | 1.00 | 43.30 | H0   |    |
| ANISOU 1628 HD3 ARG A 104  | 5700    | 5270    | 5480  | 360  | 1590  | -330 | H0 |
| ATOM 1629 HE ARG A 104     | -22.495 | -22.745 | 5.532 | 1.00 | 45.02 | H0   |    |
| ANISOU 1629 HE ARG A 104   | 5980    | 5380    | 5750  | 510  | 1770  | -420 | H0 |
| ATOM 1630 HH11 ARG A 104   | -22.101 | -19.449 | 5.221 | 1.00 | 43.54 | H0   |    |
| ANISOU 1630 HH11 ARG A 104 | 5720    | 5390    | 5430  | 230  | 1750  | -440 | H0 |
| ATOM 1631 HH12 ARG A 104   | -20.826 | -19.535 | 4.399 | 1.00 | 44.88 | H0   |    |
| ANISOU 1631 HH12 ARG A 104 | 5810    | 5630    | 5610  | 250  | 1880  | -500 | H0 |
| ATOM 1632 HH21 ARG A 104   | -20.618 | -22.847 | 4.324 | 1.00 | 46.80 | H0   |    |
| ANISOU 1632 HH21 ARG A 104 | 6100    | 5700    | 5990  | 570  | 1950  | -510 | H0 |
| ATOM 1633 HH22 ARG A 104   | -19.937 | -21.567 | 3.860 | 1.00 | 46.89 | H0   |    |
| ANISOU 1633 HH22 ARG A 104 | 6030    | 5830    | 5950  | 460  | 1990  | -540 | H0 |
| ATOM 1634 N VAL A 105      | -27.648 | -21.235 | 4.222 | 1.00 | 40.06 | N0   |    |
| ANISOU 1634 N VAL A 105    | 5810    | 4590    | 4820  | 150  | 1530  | -440 | N0 |
| ATOM 1635 CA VAL A 105     | -28.482 | -21.919 | 3.188 | 1.00 | 39.82 | C0   |    |
| ANISOU 1635 CA VAL A 105   | 5910    | 4500    | 4730  | 110  | 1560  | -510 | C0 |
| ATOM 1636 C VAL A 105      | -27.583 | -22.883 | 2.420 | 1.00 | 40.72 | C0   |    |
| ANISOU 1636 C VAL A 105    | 6040    | 4560    | 4870  | 160  | 1680  | -570 | C0 |
| ATOM 1637 O VAL A 105      | -26.523 | -22.442 | 1.945 | 1.00 | 41.85 | O0   |    |
| ANISOU 1637 O VAL A 105    | 6140    | 4750    | 5020  | 180  | 1750  | -590 | O0 |
| ATOM 1638 CB VAL A 105     | -29.185 | -20.930 | 2.239 | 1.00 | 39.60 | C0   |    |
| ANISOU 1638 CB VAL A 105   | 5950    | 4520    | 4570  | 30   | 1530  | -520 | C0 |
| ATOM 1639 CG1 VAL A 105    | -30.040 | -21.661 | 1.215 | 1.00 | 39.90 | C0   |    |
| ANISOU 1639 CG1 VAL A 105  | 6100    | 4530    | 4530  | -10  | 1550  | -600 | C0 |
| ATOM 1640 CG2 VAL A 105    | -30.024 | -19.917 | 3.003 | 1.00 | 38.90 | C0   |    |
| ANISOU 1640 CG2 VAL A 105  | 5840    | 4480    | 4460  | 0    | 1420  | -460 | C0 |
| ATOM 1641 H VAL A 105      | -27.039 | -20.654 | 3.873 | 1.00 | 40.23 | H0   |    |
| ANISOU 1641 H VAL A 105    | 5810    | 4650    | 4830  | 130  | 1570  | -450 | H0 |
| ATOM 1642 HA VAL A 105     | -29.166 | -22.437 | 3.645 | 1.00 | 39.67 | H0   |    |
| ANISOU 1642 HA VAL A 105   | 5910    | 4440    | 4720  | 110  | 1510  | -500 | H0 |
| ATOM 1643 HB VAL A 105     | -28.482 | -20.436 | 1.750 | 1.00 | 39.93 | H0   |    |
| ANISOU 1643 HB VAL A 105   | 5980    | 4590    | 4600  | 30   | 1590  | -530 | H0 |

|                            |         |         |        |      |       |       |    |
|----------------------------|---------|---------|--------|------|-------|-------|----|
| ATOM 1644 HG11 VAL A 105   | -29.468 | -22.162 | 0.610  | 1.00 | 40.72 | H0    |    |
| ANISOU 1644 HG11 VAL A 105 | 6230    | 4600    | 4640   | 0    | 1630  | -650  | H0 |
| ATOM 1645 HG12 VAL A 105   | -30.562 | -21.015 | 0.707  | 1.00 | 39.84 | H0    |    |
| ANISOU 1645 HG12 VAL A 105 | 6130    | 4570    | 4440   | -50  | 1520  | -600  | H0 |
| ATOM 1646 HG13 VAL A 105   | -30.642 | -22.274 | 1.673  | 1.00 | 39.85 | H0    |    |
| ANISOU 1646 HG13 VAL A 105 | 6100    | 4490    | 4550   | -20  | 1510  | -600  | H0 |
| ATOM 1647 HG21 VAL A 105   | -30.654 | -20.384 | 3.579  | 1.00 | 38.50 | H0    |    |
| ANISOU 1647 HG21 VAL A 105 | 5790    | 4410    | 4430   | 0    | 1370  | -450  | H0 |
| ATOM 1648 HG22 VAL A 105   | -30.513 | -19.359 | 2.374  | 1.00 | 38.77 | H0    |    |
| ANISOU 1648 HG22 VAL A 105 | 5880    | 4490    | 4360   | -30  | 1410  | -470  | H0 |
| ATOM 1649 HG23 VAL A 105   | -29.443 | -19.357 | 3.547  | 1.00 | 38.56 | H0    |    |
| ANISOU 1649 HG23 VAL A 105 | 5740    | 4460    | 4450   | 10   | 1420  | -420  | H0 |
| ATOM 1650 N VAL A 106      | -28.007 | -24.145 | 2.330  | 1.00 | 40.98 | N0    |    |
| ANISOU 1650 N VAL A 106    | 6150    | 4490    | 4930   | 180  | 1700  | -610  | N0 |
| ATOM 1651 CA VAL A 106     | -27.286 | -25.267 | 1.665  | 1.00 | 41.67 | C0    |    |
| ANISOU 1651 CA VAL A 106   | 6280    | 4500    | 5060   | 240  | 1830  | -680  | C0 |
| ATOM 1652 C VAL A 106      | -27.922 | -25.468 | 0.286  | 1.00 | 41.87 | C0    |    |
| ANISOU 1652 C VAL A 106    | 6430    | 4500    | 4970   | 150  | 1870  | -780  | C0 |
| ATOM 1653 O VAL A 106      | -29.139 | -25.217 | 0.159  | 1.00 | 40.96 | O0    |    |
| ANISOU 1653 O VAL A 106    | 6370    | 4410    | 4780   | 60   | 1790  | -790  | O0 |
| ATOM 1654 CB VAL A 106     | -27.343 | -26.554 | 2.514  | 1.00 | 42.19 | C0    |    |
| ANISOU 1654 CB VAL A 106   | 6370    | 4440    | 5220   | 320  | 1840  | -660  | C0 |
| ATOM 1655 CG1 VAL A 106    | -26.468 | -27.661 | 1.933  | 1.00 | 43.46 | C0    |    |
| ANISOU 1655 CG1 VAL A 106  | 6570    | 4510    | 5430   | 410  | 1980  | -720  | C0 |
| ATOM 1656 CG2 VAL A 106    | -26.976 | -26.285 | 3.967  | 1.00 | 41.65 | C0    |    |
| ANISOU 1656 CG2 VAL A 106  | 6180    | 4410    | 5230   | 390  | 1770  | -560  | C0 |
| ATOM 1657 H VAL A 106      | -28.803 | -24.409 | 2.686  | 1.00 | 40.57 | H0    |    |
| ANISOU 1657 H VAL A 106    | 6130    | 4410    | 4870   | 150  | 1650  | -610  | H0 |
| ATOM 1658 HA VAL A 106     | -26.353 | -25.011 | 1.545  | 1.00 | 42.08 | H0    |    |
| ANISOU 1658 HA VAL A 106   | 6270    | 4590    | 5130   | 280  | 1880  | -680  | H0 |
| ATOM 1659 HB VAL A 106     | -28.279 | -26.874 | 2.498  | 1.00 | 41.97 | H0    |    |
| ANISOU 1659 HB VAL A 106   | 6410    | 4370    | 5160   | 250  | 1810  | -680  | H0 |
| ATOM 1660 HG11 VAL A 106   | -26.865 | -27.991 | 1.108  | 1.00 | 43.99 | H0    |    |
| ANISOU 1660 HG11 VAL A 106 | 6730    | 4530    | 5450   | 350  | 2020  | -800  | H0 |
| ATOM 1661 HG12 VAL A 106   | -26.399 | -28.391 | 2.572  | 1.00 | 43.96 | H0    |    |
| ANISOU 1661 HG12 VAL A 106 | 6650    | 4490    | 5560   | 480  | 1990  | -690  | H0 |
| ATOM 1662 HG13 VAL A 106   | -25.580 | -27.309 | 1.747  | 1.00 | 43.83 | H0    |    |
| ANISOU 1662 HG13 VAL A 106 | 6550    | 4610    | 5490   | 460  | 2020  | -720  | H0 |
| ATOM 1663 HG21 VAL A 106   | -26.137 | -25.793 | 4.005  | 1.00 | 41.71 | H0    |    |
| ANISOU 1663 HG21 VAL A 106 | 6100    | 4490    | 5250   | 430  | 1780  | -540  | H0 |
| ATOM 1664 HG22 VAL A 106   | -26.876 | -27.130 | 4.440  | 1.00 | 42.18 | H0    |    |
| ANISOU 1664 HG22 VAL A 106 | 6270    | 4400    | 5350   | 460  | 1790  | -540  | H0 |
| ATOM 1665 HG23 VAL A 106   | -27.678 | -25.760 | 4.389  | 1.00 | 40.73 | H0    |    |
| ANISOU 1665 HG23 VAL A 106 | 6060    | 4340    | 5080   | 330  | 1680  | -520  | H0 |
| ATOM 1666 N SER A 107      | -27.133 | -25.937 | -0.684 | 1.00 | 42.64 | N0    |    |
| ANISOU 1666 N SER A 107    | 6560    | 4570    | 5070   | 180  | 1990  | -860  | N0 |
| ATOM 1667 CA SER A 107     | -27.496 | -26.064 | -2.123 | 1.00 | 43.26 | C0    |    |
| ANISOU 1667 CA SER A 107   | 6750    | 4660    | 5030   | 90   | 2050  | -960  | C0 |
| ATOM 1668 C SER A 107      | -28.694 | -27.005 | -2.323 | 1.00 | 43.40 | C0    |    |
| ANISOU 1668 C SER A 107    | 6890    | 4600    | 5010   | 20   | 2030  | -1030 | C0 |
| ATOM 1669 O SER A 107      | -29.369 | -26.864 | -3.349 | 1.00 | 43.48 | O0    |    |
| ANISOU 1669 O SER A 107    | 6980    | 4660    | 4890   | -80  | 2030  | -1100 | O0 |
| ATOM 1670 CB SER A 107     | -26.305 | -26.508 | -2.926 | 1.00 | 44.48 | C0    |    |
| ANISOU 1670 CB SER A 107   | 6910    | 4790    | 5200   | 150  | 2200  | -1030 | C0 |

|                           |         |         |        |      |       |       |    |
|---------------------------|---------|---------|--------|------|-------|-------|----|
| ATOM 1671 OG SER A 107    | -25.835 | -27.766 | -2.468 | 1.00 | 45.88 | O0    |    |
| ANISOU 1671 OG SER A 107  | 7100    | 4840    | 5490   | 260  | 2270  | -1050 | O0 |
| ATOM 1672 H SER A 107     | -26.282 | -26.220 | -0.524 | 1.00 | 43.24 | H0    |    |
| ANISOU 1672 H SER A 107   | 6590    | 4630    | 5210   | 250  | 2050  | -850  | H0 |
| ATOM 1673 HA SER A 107    | -27.764 | -25.165 | -2.443 | 1.00 | 42.70 | H0    |    |
| ANISOU 1673 HA SER A 107  | 6680    | 4670    | 4880   | 40   | 2010  | -940  | H0 |
| ATOM 1674 HB2 SER A 107   | -26.556 | -26.575 | -3.874 | 1.00 | 45.15 | H0    |    |
| ANISOU 1674 HB2 SER A 107 | 7070    | 4880    | 5200   | 100  | 2240  | -1100 | H0 |
| ATOM 1675 HB3 SER A 107   | -25.588 | -25.839 | -2.844 | 1.00 | 44.45 | H0    |    |
| ANISOU 1675 HB3 SER A 107 | 6830    | 4850    | 5210   | 180  | 2210  | -990  | H0 |
| ATOM 1676 N ASP A 108     | -28.961 | -27.917 | -1.383 | 1.00 | 43.75 | N0    |    |
| ANISOU 1676 N ASP A 108   | 6950    | 4530    | 5140   | 50   | 2020  | -1010 | N0 |
| ATOM 1677 CA ASP A 108    | -30.145 | -28.822 | -1.420 | 1.00 | 44.71 | C0    |    |
| ANISOU 1677 CA ASP A 108  | 7180    | 4580    | 5230   | -40  | 2000  | -1070 | C0 |
| ATOM 1678 C ASP A 108     | -31.382 | -28.122 | -0.824 | 1.00 | 43.66 | C0    |    |
| ANISOU 1678 C ASP A 108   | 7000    | 4540    | 5050   | -130 | 1850  | -1020 | C0 |
| ATOM 1679 O ASP A 108     | -32.439 | -28.760 | -0.782 | 1.00 | 43.87 | O0    |    |
| ANISOU 1679 O ASP A 108   | 7100    | 4530    | 5040   | -220 | 1830  | -1080 | O0 |
| ATOM 1680 CB ASP A 108    | -29.856 | -30.153 | -0.719 | 1.00 | 45.74 | C0    |    |
| ANISOU 1680 CB ASP A 108  | 7360    | 4530    | 5490   | 30   | 2080  | -1080 | C0 |
| ATOM 1681 CG ASP A 108    | -29.652 | -30.061 | 0.786  | 1.00 | 45.32 | C0    |    |
| ANISOU 1681 CG ASP A 108  | 7220    | 4460    | 5540   | 130  | 2010  | -940  | C0 |
| ATOM 1682 OD1 ASP A 108   | -29.691 | -28.933 | 1.333  | 1.00 | 43.21 | O0    |    |
| ANISOU 1682 OD1 ASP A 108 | 6840    | 4320    | 5260   | 130  | 1910  | -860  | O0 |
| ATOM 1683 OD2 ASP A 108   | -29.459 | -31.127 | 1.401  | 1.00 | 47.27 | O0    |    |
| ANISOU 1683 OD2 ASP A 108 | 7520    | 4560    | 5880   | 200  | 2070  | -930  | O0 |
| ATOM 1684 H ASP A 108     | -28.420 | -28.053 | -0.665 | 1.00 | 43.73 | H0    |    |
| ANISOU 1684 H ASP A 108   | 6890    | 4500    | 5230   | 140  | 2030  | -950  | H0 |
| ATOM 1685 HA ASP A 108    | -30.339 | -29.024 | -2.365 | 1.00 | 45.36 | H0    |    |
| ANISOU 1685 HA ASP A 108  | 7330    | 4670    | 5240   | -100 | 2050  | -1160 | H0 |
| ATOM 1686 HB2 ASP A 108   | -30.601 | -30.765 | -0.887 | 1.00 | 46.29 | H0    |    |
| ANISOU 1686 HB2 ASP A 108 | 7520    | 4540    | 5530   | -50  | 2090  | -1140 | H0 |
| ATOM 1687 HB3 ASP A 108   | -29.048 | -30.545 | -1.110 | 1.00 | 46.67 | H0    |    |
| ANISOU 1687 HB3 ASP A 108 | 7500    | 4600    | 5640   | 100  | 2180  | -1110 | H0 |
| ATOM 1688 N GLY A 109     | -31.263 | -26.868 | -0.384 | 1.00 | 42.65 | N0    |    |
| ANISOU 1688 N GLY A 109   | 6770    | 4520    | 4910   | -100 | 1770  | -930  | N0 |
| ATOM 1689 CA GLY A 109    | -32.395 | -26.034 | 0.067  | 1.00 | 42.81 | C0    |    |
| ANISOU 1689 CA GLY A 109  | 6750    | 4650    | 4860   | -160 | 1630  | -880  | C0 |
| ATOM 1690 C GLY A 109     | -32.628 | -26.085 | 1.574  | 1.00 | 42.42 | C0    |    |
| ANISOU 1690 C GLY A 109   | 6640    | 4570    | 4910   | -120 | 1560  | -790  | C0 |
| ATOM 1691 O GLY A 109     | -33.641 | -25.518 | 2.012  | 1.00 | 42.03 | O0    |    |
| ANISOU 1691 O GLY A 109   | 6560    | 4600    | 4810   | -180 | 1460  | -760  | O0 |
| ATOM 1692 H GLY A 109     | -30.459 | -26.450 | -0.324 | 1.00 | 42.73 | H0    |    |
| ANISOU 1692 H GLY A 109   | 6730    | 4550    | 4950   | -40  | 1790  | -890  | H0 |
| ATOM 1693 HA2 GLY A 109   | -32.223 | -25.096 | -0.200 | 1.00 | 42.16 | H0    |    |
| ANISOU 1693 HA2 GLY A 109 | 6640    | 4640    | 4740   | -150 | 1600  | -850  | H0 |
| ATOM 1694 HA3 GLY A 109   | -33.216 | -26.331 | -0.398 | 1.00 | 42.98 | H0    |    |
| ANISOU 1694 HA3 GLY A 109 | 6830    | 4690    | 4820   | -240 | 1620  | -940  | H0 |
| ATOM 1695 N GLU A 110     | -31.747 | -26.731 | 2.346  | 1.00 | 43.51 | N0    |    |
| ANISOU 1695 N GLU A 110   | 6760    | 4610    | 5170   | -30  | 1620  | -750  | N0 |
| ATOM 1696 CA GLU A 110    | -31.790 | -26.702 | 3.833  | 1.00 | 43.91 | C0    |    |
| ANISOU 1696 CA GLU A 110  | 6740    | 4640    | 5300   | 20   | 1550  | -640  | C0 |
| ATOM 1697 C GLU A 110     | -31.394 | -25.296 | 4.302  | 1.00 | 42.59 | C0    |    |
| ANISOU 1697 C GLU A 110   | 6450    | 4600    | 5130   | 50   | 1480  | -560  | C0 |

|                            |         |         |       |      |       |      |    |
|----------------------------|---------|---------|-------|------|-------|------|----|
| ATOM 1698 O GLU A 110      | -30.445 | -24.715 | 3.722 | 1.00 | 41.56 | O0   |    |
| ANISOU 1698 O GLU A 110    | 6290    | 4510    | 4990  | 90   | 1530  | -570 | O0 |
| ATOM 1699 CB GLU A 110     | -30.877 | -27.761 | 4.461 | 1.00 | 46.66 | C0   |    |
| ANISOU 1699 CB GLU A 110   | 7090    | 4870    | 5770  | 130  | 1630  | -610 | C0 |
| ATOM 1700 CG GLU A 110     | -30.915 | -27.753 | 5.987 | 1.00 | 48.17 | C0   |    |
| ANISOU 1700 CG GLU A 110   | 7220    | 5060    | 6030  | 190  | 1560  | -500 | C0 |
| ATOM 1701 CD GLU A 110     | -30.202 | -28.892 | 6.703 | 1.00 | 50.82 | C0   |    |
| ANISOU 1701 CD GLU A 110   | 7580    | 5270    | 6460  | 310  | 1630  | -460 | C0 |
| ATOM 1702 OE1 GLU A 110    | -29.355 | -29.563 | 6.072 | 1.00 | 53.83 | O0   |    |
| ANISOU 1702 OE1 GLU A 110  | 8000    | 5570    | 6880  | 390  | 1740  | -500 | O0 |
| ATOM 1703 OE2 GLU A 110    | -30.485 | -29.096 | 7.903 | 1.00 | 52.42 | O0   |    |
| ANISOU 1703 OE2 GLU A 110  | 7760    | 5450    | 6700  | 330  | 1580  | -370 | O0 |
| ATOM 1704 H GLU A 110      | -31.065 | -27.230 | 2.007 | 1.00 | 44.30 | H0   |    |
| ANISOU 1704 H GLU A 110    | 6880    | 4650    | 5300  | 10   | 1700  | -770 | H0 |
| ATOM 1705 HA GLU A 110     | -32.716 | -26.878 | 4.116 | 1.00 | 43.80 | H0   |    |
| ANISOU 1705 HA GLU A 110   | 6750    | 4630    | 5260  | -40  | 1510  | -650 | H0 |
| ATOM 1706 HB2 GLU A 110    | -31.150 | -28.644 | 4.138 | 1.00 | 47.49 | H0   |    |
| ANISOU 1706 HB2 GLU A 110  | 7290    | 4880    | 5880  | 110  | 1690  | -670 | H0 |
| ATOM 1707 HB3 GLU A 110    | -29.957 | -27.600 | 4.163 | 1.00 | 46.97 | H0   |    |
| ANISOU 1707 HB3 GLU A 110  | 7100    | 4920    | 5830  | 200  | 1680  | -610 | H0 |
| ATOM 1708 HG2 GLU A 110    | -30.525 | -26.911 | 6.303 | 1.00 | 47.35 | H0   |    |
| ANISOU 1708 HG2 GLU A 110  | 7030    | 5040    | 5920  | 220  | 1520  | -460 | H0 |
| ATOM 1709 HG3 GLU A 110    | -31.854 | -27.760 | 6.272 | 1.00 | 47.65 | H0   |    |
| ANISOU 1709 HG3 GLU A 110  | 7180    | 5000    | 5930  | 110  | 1510  | -510 | H0 |
| ATOM 1710 N VAL A 111      | -32.109 | -24.776 | 5.307 | 1.00 | 40.71 | N0   |    |
| ANISOU 1710 N VAL A 111    | 6170    | 4410    | 4890  | 30   | 1380  | -500 | N0 |
| ATOM 1711 CA VAL A 111     | -31.818 | -23.480 | 5.986 | 1.00 | 39.95 | C0   |    |
| ANISOU 1711 CA VAL A 111   | 5970    | 4410    | 4800  | 50   | 1310  | -430 | C0 |
| ATOM 1712 C VAL A 111      | -31.519 | -23.771 | 7.464 | 1.00 | 40.54 | C0   |    |
| ANISOU 1712 C VAL A 111    | 5980    | 4470    | 4960  | 110  | 1280  | -350 | C0 |
| ATOM 1713 O VAL A 111      | -32.320 | -24.490 | 8.104 | 1.00 | 39.70 | O0   |    |
| ANISOU 1713 O VAL A 111    | 5900    | 4310    | 4870  | 90   | 1250  | -330 | O0 |
| ATOM 1714 CB VAL A 111     | -32.975 | -22.476 | 5.821 | 1.00 | 38.87 | C0   |    |
| ANISOU 1714 CB VAL A 111   | 5840    | 4360    | 4560  | -20  | 1220  | -420 | C0 |
| ATOM 1715 CG1 VAL A 111    | -32.615 | -21.106 | 6.370 | 1.00 | 38.17 | C0   |    |
| ANISOU 1715 CG1 VAL A 111  | 5680    | 4350    | 4470  | 0    | 1180  | -360 | C0 |
| ATOM 1716 CG2 VAL A 111    | -33.425 | -22.360 | 4.374 | 1.00 | 39.33 | C0   |    |
| ANISOU 1716 CG2 VAL A 111  | 5970    | 4450    | 4520  | -70  | 1250  | -500 | C0 |
| ATOM 1717 H VAL A 111      | -32.841 | -25.197 | 5.648 | 1.00 | 40.97 | H0   |    |
| ANISOU 1717 H VAL A 111    | 6230    | 4420    | 4920  | -10  | 1350  | -510 | H0 |
| ATOM 1718 HA VAL A 111     | -31.021 | -23.096 | 5.582 | 1.00 | 40.17 | H0   |    |
| ANISOU 1718 HA VAL A 111   | 5970    | 4460    | 4830  | 80   | 1350  | -430 | H0 |
| ATOM 1719 HB VAL A 111     | -33.739 | -22.819 | 6.347 | 1.00 | 38.77 | H0   |    |
| ANISOU 1719 HB VAL A 111   | 5830    | 4340    | 4560  | -50  | 1180  | -420 | H0 |
| ATOM 1720 HG11 VAL A 111   | -32.543 | -21.151 | 7.340 | 1.00 | 37.83 | H0   |    |
| ANISOU 1720 HG11 VAL A 111 | 5580    | 4310    | 4480  | 20   | 1150  | -320 | H0 |
| ATOM 1721 HG12 VAL A 111   | -33.306 | -20.466 | 6.128 | 1.00 | 37.83 | H0   |    |
| ANISOU 1721 HG12 VAL A 111 | 5650    | 4360    | 4370  | -30  | 1140  | -360 | H0 |
| ATOM 1722 HG13 VAL A 111   | -31.764 | -20.819 | 5.996 | 1.00 | 38.38 | H0   |    |
| ANISOU 1722 HG13 VAL A 111 | 5690    | 4380    | 4510  | 20   | 1230  | -360 | H0 |
| ATOM 1723 HG21 VAL A 111   | -32.655 | -22.182 | 3.807 | 1.00 | 39.65 | H0   |    |
| ANISOU 1723 HG21 VAL A 111 | 6020    | 4490    | 4560  | -50  | 1300  | -510 | H0 |
| ATOM 1724 HG22 VAL A 111   | -34.065 | -21.632 | 4.289 | 1.00 | 38.94 | H0   |    |
| ANISOU 1724 HG22 VAL A 111 | 5920    | 4470    | 4410  | -100 | 1190  | -490 | H0 |

|                            |         |         |        |      |       |      |    |
|----------------------------|---------|---------|--------|------|-------|------|----|
| ATOM 1725 HG23 VAL A 111   | -33.845 | -23.193 | 4.096  | 1.00 | 39.85 | H0   |    |
| ANISOU 1725 HG23 VAL A 111 | 6090    | 4480    | 4580   | -110 | 1270  | -550 | H0 |
| ATOM 1726 N LEU A 112      | -30.396 | -23.243 | 7.968  | 1.00 | 40.96 | N0   |    |
| ANISOU 1726 N LEU A 112    | 5930    | 4570    | 5060   | 180  | 1280  | -300 | N0 |
| ATOM 1727 CA LEU A 112     | -29.972 | -23.333 | 9.387  | 1.00 | 40.80 | C0   |    |
| ANISOU 1727 CA LEU A 112   | 5830    | 4570    | 5100   | 240  | 1240  | -220 | C0 |
| ATOM 1728 C LEU A 112      | -29.892 | -21.914 | 9.958  | 1.00 | 40.12 | C0   |    |
| ANISOU 1728 C LEU A 112    | 5660    | 4600    | 4990   | 210  | 1180  | -180 | C0 |
| ATOM 1729 O LEU A 112      | -28.960 | -21.171 | 9.584  | 1.00 | 39.90 | O0   |    |
| ANISOU 1729 O LEU A 112    | 5570    | 4630    | 4960   | 220  | 1210  | -190 | O0 |
| ATOM 1730 CB LEU A 112     | -28.627 | -24.061 | 9.474  | 1.00 | 42.85 | C0   |    |
| ANISOU 1730 CB LEU A 112   | 6040    | 4810    | 5440   | 360  | 1320  | -200 | C0 |
| ATOM 1731 CG LEU A 112     | -28.562 | -25.408 | 8.751  | 1.00 | 44.54 | C0   |    |
| ANISOU 1731 CG LEU A 112   | 6360    | 4890    | 5680   | 400  | 1410  | -250 | C0 |
| ATOM 1732 CD1 LEU A 112    | -28.004 | -25.246 | 7.346  | 1.00 | 45.34 | C0   |    |
| ANISOU 1732 CD1 LEU A 112  | 6480    | 4990    | 5750   | 390  | 1490  | -330 | C0 |
| ATOM 1733 CD2 LEU A 112    | -27.730 | -26.417 | 9.529  | 1.00 | 45.80 | C0   |    |
| ANISOU 1733 CD2 LEU A 112  | 6490    | 4990    | 5920   | 550  | 1450  | -190 | C0 |
| ATOM 1734 H LEU A 112      | -29.807 | -22.779 | 7.450  | 1.00 | 40.95 | H0   |    |
| ANISOU 1734 H LEU A 112    | 5910    | 4600    | 5050   | 190  | 1320  | -310 | H0 |
| ATOM 1735 HA LEU A 112     | -30.652 | -23.840 | 9.887  | 1.00 | 40.95 | H0   |    |
| ANISOU 1735 HA LEU A 112   | 5880    | 4550    | 5130   | 230  | 1210  | -200 | H0 |
| ATOM 1736 HB2 LEU A 112    | -27.935 | -23.476 | 9.105  | 1.00 | 42.81 | H0   |    |
| ANISOU 1736 HB2 LEU A 112  | 5980    | 4860    | 5430   | 370  | 1340  | -220 | H0 |
| ATOM 1737 HB3 LEU A 112    | -28.417 | -24.205 | 10.419 | 1.00 | 42.78 | H0   |    |
| ANISOU 1737 HB3 LEU A 112  | 5980    | 4810    | 5460   | 410  | 1280  | -140 | H0 |
| ATOM 1738 HG LEU A 112     | -29.483 | -25.761 | 8.677  | 1.00 | 44.37 | H0   |    |
| ANISOU 1738 HG LEU A 112   | 6410    | 4810    | 5630   | 350  | 1390  | -270 | H0 |
| ATOM 1739 HD11 LEU A 112   | -28.619 | -24.720 | 6.809  | 1.00 | 44.72 | H0   |    |
| ANISOU 1739 HD11 LEU A 112 | 6440    | 4940    | 5610   | 310  | 1470  | -360 | H0 |
| ATOM 1740 HD12 LEU A 112   | -27.890 | -26.123 | 6.940  | 1.00 | 46.06 | H0   |    |
| ANISOU 1740 HD12 LEU A 112 | 6640    | 5000    | 5870   | 430  | 1560  | -360 | H0 |
| ATOM 1741 HD13 LEU A 112   | -27.143 | -24.795 | 7.388  | 1.00 | 45.38 | H0   |    |
| ANISOU 1741 HD13 LEU A 112 | 6400    | 5070    | 5770   | 430  | 1510  | -320 | H0 |
| ATOM 1742 HD21 LEU A 112   | -26.832 | -26.066 | 9.658  | 1.00 | 45.96 | H0   |    |
| ANISOU 1742 HD21 LEU A 112 | 6410    | 5090    | 5960   | 610  | 1450  | -170 | H0 |
| ATOM 1743 HD22 LEU A 112   | -27.684 | -27.252 | 9.031  | 1.00 | 46.54 | H0   |    |
| ANISOU 1743 HD22 LEU A 112 | 6660    | 4990    | 6030   | 580  | 1510  | -220 | H0 |
| ATOM 1744 HD23 LEU A 112   | -28.143 | -26.579 | 10.395 | 1.00 | 45.50 | H0   |    |
| ANISOU 1744 HD23 LEU A 112 | 6450    | 4950    | 5890   | 550  | 1390  | -140 | H0 |
| ATOM 1745 N TYR A 113      | -30.869 | -21.552 | 10.795 | 1.00 | 39.10 | N0   |    |
| ANISOU 1745 N TYR A 113    | 5520    | 4490    | 4840   | 170  | 1090  | -150 | N0 |
| ATOM 1746 CA TYR A 113     | -30.929 | -20.277 | 11.555 | 1.00 | 38.74 | C0   |    |
| ANISOU 1746 CA TYR A 113   | 5410    | 4540    | 4770   | 140  | 1030  | -110 | C0 |
| ATOM 1747 C TYR A 113      | -30.721 | -20.591 | 13.038 | 1.00 | 39.14 | C0   |    |
| ANISOU 1747 C TYR A 113    | 5390    | 4620    | 4860   | 180  | 980   | -50  | C0 |
| ATOM 1748 O TYR A 113      | -31.608 | -21.240 | 13.638 | 1.00 | 38.01 | O0   |    |
| ANISOU 1748 O TYR A 113    | 5280    | 4440    | 4720   | 170  | 950   | -20  | O0 |
| ATOM 1749 CB TYR A 113     | -32.261 | -19.564 | 11.317 | 1.00 | 38.30 | C0   |    |
| ANISOU 1749 CB TYR A 113   | 5410    | 4500    | 4640   | 70   | 980   | -130 | C0 |
| ATOM 1750 CG TYR A 113     | -32.411 | -18.278 | 12.091 | 1.00 | 39.14 | C0   |    |
| ANISOU 1750 CG TYR A 113   | 5470    | 4680    | 4720   | 40   | 920   | -100 | C0 |
| ATOM 1751 CD1 TYR A 113    | -31.400 | -17.329 | 12.092 | 1.00 | 39.68 | C0   |    |
| ANISOU 1751 CD1 TYR A 113  | 5490    | 4790    | 4800   | 40   | 950   | -100 | C0 |

|                           |         |         |        |      |       |      |    |
|---------------------------|---------|---------|--------|------|-------|------|----|
| ATOM 1752 CD2 TYR A 113   | -33.555 | -18.009 | 12.828 | 1.00 | 38.98 | C0   |    |
| ANISOU 1752 CD2 TYR A 113 | 5450    | 4680    | 4680   | 20   | 850   | -80  | C0 |
| ATOM 1753 CE1 TYR A 113   | -31.517 | -16.149 | 12.804 | 1.00 | 39.75 | C0   |    |
| ANISOU 1753 CE1 TYR A 113 | 5470    | 4850    | 4790   | 0    | 920   | -90  | C0 |
| ATOM 1754 CE2 TYR A 113   | -33.687 | -16.831 | 13.545 | 1.00 | 38.79 | C0   |    |
| ANISOU 1754 CE2 TYR A 113 | 5400    | 4710    | 4630   | 0    | 820   | -70  | C0 |
| ATOM 1755 CZ TYR A 113    | -32.665 | -15.900 | 13.532 | 1.00 | 39.24 | C0   |    |
| ANISOU 1755 CZ TYR A 113  | 5420    | 4790    | 4690   | -10  | 850   | -70  | C0 |
| ATOM 1756 OH TYR A 113    | -32.780 | -14.732 | 14.224 | 1.00 | 39.72 | O0   |    |
| ANISOU 1756 OH TYR A 113  | 5470    | 4890    | 4730   | -40  | 830   | -60  | O0 |
| ATOM 1757 H TYR A 113     | -31.592 | -22.080 | 10.962 | 1.00 | 39.23 | H0   |    |
| ANISOU 1757 H TYR A 113   | 5580    | 4470    | 4850   | 150  | 1080  | -150 | H0 |
| ATOM 1758 HA TYR A 113    | -30.194 | -19.690 | 11.249 | 1.00 | 38.95 | H0   |    |
| ANISOU 1758 HA TYR A 113  | 5400    | 4600    | 4790   | 140  | 1060  | -130 | H0 |
| ATOM 1759 HB2 TYR A 113   | -32.345 | -19.370 | 10.360 | 1.00 | 38.70 | H0   |    |
| ANISOU 1759 HB2 TYR A 113 | 5510    | 4540    | 4660   | 50   | 1000  | -170 | H0 |
| ATOM 1760 HB3 TYR A 113   | -32.988 | -20.172 | 11.565 | 1.00 | 38.56 | H0   |    |
| ANISOU 1760 HB3 TYR A 113 | 5470    | 4510    | 4670   | 60   | 950   | -130 | H0 |
| ATOM 1761 HD1 TYR A 113   | -30.613 | -17.492 | 11.599 | 1.00 | 40.11 | H0   |    |
| ANISOU 1761 HD1 TYR A 113 | 5530    | 4840    | 4870   | 50   | 1000  | -120 | H0 |
| ATOM 1762 HD2 TYR A 113   | -34.255 | -18.640 | 12.845 | 1.00 | 38.98 | H0   |    |
| ANISOU 1762 HD2 TYR A 113 | 5480    | 4660    | 4670   | 10   | 840   | -90  | H0 |
| ATOM 1763 HE1 TYR A 113   | -30.819 | -15.515 | 12.789 | 1.00 | 39.78 | H0   |    |
| ANISOU 1763 HE1 TYR A 113 | 5450    | 4880    | 4790   | -20  | 940   | -90  | H0 |
| ATOM 1764 HE2 TYR A 113   | -34.472 | -16.662 | 14.040 | 1.00 | 38.53 | H0   |    |
| ANISOU 1764 HE2 TYR A 113 | 5360    | 4700    | 4580   | -10  | 770   | -60  | H0 |
| ATOM 1765 N MET A 114     | -29.588 | -20.161 | 13.601 | 1.00 | 39.74 | N0   |    |
| ANISOU 1765 N MET A 114   | 5360    | 4770    | 4970   | 220  | 980   | -20  | N0 |
| ATOM 1766 CA MET A 114    | -29.151 | -20.563 | 14.966 | 1.00 | 41.35 | C0   |    |
| ANISOU 1766 CA MET A 114  | 5480    | 5020    | 5200   | 270  | 940   | 40   | C0 |
| ATOM 1767 C MET A 114     | -28.779 | -19.322 | 15.773 | 1.00 | 39.58 | C0   |    |
| ANISOU 1767 C MET A 114   | 5160    | 4920    | 4960   | 230  | 890   | 50   | C0 |
| ATOM 1768 O MET A 114     | -27.623 | -19.137 | 16.133 | 1.00 | 40.43 | O0   |    |
| ANISOU 1768 O MET A 114   | 5160    | 5120    | 5080   | 260  | 900   | 60   | O0 |
| ATOM 1769 CB MET A 114    | -27.953 | -21.517 | 14.897 | 1.00 | 44.83 | C0   |    |
| ANISOU 1769 CB MET A 114  | 5870    | 5460    | 5700   | 390  | 990   | 60   | C0 |
| ATOM 1770 CG MET A 114    | -27.939 | -22.412 | 13.661 | 1.00 | 47.23 | C0   |    |
| ANISOU 1770 CG MET A 114  | 6270    | 5650    | 6030   | 420  | 1080  | 20   | C0 |
| ATOM 1771 SD MET A 114    | -29.161 | -23.754 | 13.719 | 1.00 | 51.07 | S0   |    |
| ANISOU 1771 SD MET A 114  | 6900    | 5980    | 6520   | 420  | 1080  | 30   | S0 |
| ATOM 1772 CE MET A 114    | -28.129 | -25.096 | 14.305 | 1.00 | 51.60 | C0   |    |
| ANISOU 1772 CE MET A 114  | 6950    | 6000    | 6660   | 590  | 1130  | 100  | C0 |
| ATOM 1773 H MET A 114     | -29.013 | -19.593 | 13.181 | 1.00 | 40.05 | H0   |    |
| ANISOU 1773 H MET A 114   | 5370    | 4840    | 5000   | 200  | 1010  | -50  | H0 |
| ATOM 1774 HA MET A 114    | -29.902 | -21.015 | 15.414 | 1.00 | 41.05 | H0   |    |
| ANISOU 1774 HA MET A 114  | 5490    | 4950    | 5160   | 270  | 910   | 70   | H0 |
| ATOM 1775 HB2 MET A 114   | -27.131 | -20.992 | 14.913 | 1.00 | 44.91 | H0   |    |
| ANISOU 1775 HB2 MET A 114 | 5800    | 5550    | 5710   | 390  | 1000  | 50   | H0 |
| ATOM 1776 HB3 MET A 114   | -27.959 | -22.081 | 15.696 | 1.00 | 44.99 | H0   |    |
| ANISOU 1776 HB3 MET A 114 | 5880    | 5480    | 5740   | 440  | 970   | 110  | H0 |
| ATOM 1777 HG2 MET A 114   | -28.107 | -21.867 | 12.864 | 1.00 | 47.24 | H0   |    |
| ANISOU 1777 HG2 MET A 114 | 6300    | 5650    | 6000   | 360  | 1100  | -30  | H0 |
| ATOM 1778 HG3 MET A 114   | -27.046 | -22.808 | 13.567 | 1.00 | 48.36 | H0   |    |
| ANISOU 1778 HG3 MET A 114 | 6370    | 5810    | 6200   | 500  | 1120  | 20   | H0 |

|                           |         |         |        |      |       |     |    |
|---------------------------|---------|---------|--------|------|-------|-----|----|
| ATOM 1779 HE1 MET A 114   | -28.648 | -25.909 | 14.339 | 1.00 | 52.20 |     | H0 |
| ANISOU 1779 HE1 MET A 114 | 7120    | 5970    | 6750   | 600  | 1150  | 110 | H0 |
| ATOM 1780 HE2 MET A 114   | -27.384 | -25.214 | 13.704 | 1.00 | 52.44 |     | H0 |
| ANISOU 1780 HE2 MET A 114 | 7030    | 6100    | 6790   | 640  | 1180  | 80  | H0 |
| ATOM 1781 HE3 MET A 114   | -27.801 | -24.887 | 15.188 | 1.00 | 51.92 |     | H0 |
| ANISOU 1781 HE3 MET A 114 | 6910    | 6110    | 6700   | 630  | 1080  | 160 | H0 |
| ATOM 1782 N PRO A 115     | -29.739 | -18.425 | 16.087 | 1.00 | 37.74 |     | N0 |
| ANISOU 1782 N PRO A 115   | 4960    | 4700    | 4680   | 150  | 850   | 40  | N0 |
| ATOM 1783 CA PRO A 115    | -29.440 | -17.254 | 16.912 | 1.00 | 37.41 |     | C0 |
| ANISOU 1783 CA PRO A 115  | 4850    | 4750    | 4610   | 100  | 810   | 40  | C0 |
| ATOM 1784 C PRO A 115     | -29.114 | -17.664 | 18.354 | 1.00 | 37.23 |     | C0 |
| ANISOU 1784 C PRO A 115   | 4740    | 4810    | 4600   | 140  | 760   | 90  | C0 |
| ATOM 1785 O PRO A 115     | -29.703 | -18.605 | 18.828 | 1.00 | 37.22 |     | O0 |
| ANISOU 1785 O PRO A 115   | 4770    | 4770    | 4600   | 180  | 730   | 140 | O0 |
| ATOM 1786 CB PRO A 115    | -30.731 | -16.429 | 16.857 | 1.00 | 36.52 |     | C0 |
| ANISOU 1786 CB PRO A 115  | 4820    | 4610    | 4450   | 30   | 780   | 20  | C0 |
| ATOM 1787 CG PRO A 115    | -31.807 | -17.457 | 16.580 | 1.00 | 36.85 |     | C0 |
| ANISOU 1787 CG PRO A 115  | 4940    | 4570    | 4490   | 60   | 770   | 30  | C0 |
| ATOM 1788 CD PRO A 115    | -31.150 | -18.478 | 15.673 | 1.00 | 37.34 |     | C0 |
| ANISOU 1788 CD PRO A 115  | 5020    | 4580    | 4590   | 110  | 830   | 20  | C0 |
| ATOM 1789 HA PRO A 115    | -28.693 | -16.742 | 16.515 | 1.00 | 37.61 |     | H0 |
| ANISOU 1789 HA PRO A 115  | 4840    | 4810    | 4640   | 80   | 850   | 10  | H0 |
| ATOM 1790 HB2 PRO A 115   | -30.895 | -15.971 | 17.709 | 1.00 | 36.50 |     | H0 |
| ANISOU 1790 HB2 PRO A 115 | 4780    | 4650    | 4430   | 10   | 750   | 30  | H0 |
| ATOM 1791 HB3 PRO A 115   | -30.692 | -15.762 | 16.139 | 1.00 | 36.57 |     | H0 |
| ANISOU 1791 HB3 PRO A 115 | 4860    | 4600    | 4440   | 0    | 810   | -10 | H0 |
| ATOM 1792 HG2 PRO A 115   | -32.109 | -17.876 | 17.412 | 1.00 | 36.69 |     | H0 |
| ANISOU 1792 HG2 PRO A 115 | 4900    | 4570    | 4480   | 70   | 740   | 70  | H0 |
| ATOM 1793 HG3 PRO A 115   | -32.577 | -17.044 | 16.139 | 1.00 | 36.33 |     | H0 |
| ANISOU 1793 HG3 PRO A 115 | 4920    | 4490    | 4390   | 30   | 760   | 10  | H0 |
| ATOM 1794 HD2 PRO A 115   | -31.525 | -19.367 | 15.812 | 1.00 | 37.48 |     | H0 |
| ANISOU 1794 HD2 PRO A 115 | 5060    | 4550    | 4630   | 130  | 830   | 40  | H0 |
| ATOM 1795 HD3 PRO A 115   | -31.249 | -18.233 | 14.735 | 1.00 | 37.27 |     | H0 |
| ANISOU 1795 HD3 PRO A 115 | 5050    | 4540    | 4570   | 90   | 860   | -10 | H0 |
| ATOM 1796 N SER A 116     | -28.155 | -16.988 | 18.986 | 1.00 | 37.51 |     | N0 |
| ANISOU 1796 N SER A 116   | 4660    | 4970    | 4620   | 120  | 750   | 80  | N0 |
| ATOM 1797 CA SER A 116    | -27.959 | -17.007 | 20.456 | 1.00 | 37.32 |     | C0 |
| ANISOU 1797 CA SER A 116  | 4550    | 5050    | 4580   | 130  | 680   | 130 | C0 |
| ATOM 1798 C SER A 116     | -28.872 | -15.940 | 21.061 | 1.00 | 36.14 |     | C0 |
| ANISOU 1798 C SER A 116   | 4440    | 4910    | 4380   | 30   | 640   | 100 | C0 |
| ATOM 1799 O SER A 116     | -28.818 | -14.790 | 20.612 | 1.00 | 35.49 |     | O0 |
| ANISOU 1799 O SER A 116   | 4380    | 4830    | 4280   | -50  | 670   | 40  | O0 |
| ATOM 1800 CB SER A 116    | -26.523 | -16.804 | 20.849 | 1.00 | 38.88 |     | C0 |
| ANISOU 1800 CB SER A 116  | 4600    | 5400    | 4770   | 140  | 680   | 120 | C0 |
| ATOM 1801 OG SER A 116    | -26.343 | -17.097 | 22.227 | 1.00 | 39.13 |     | O0 |
| ANISOU 1801 OG SER A 116  | 4550    | 5540    | 4780   | 180  | 610   | 170 | O0 |
| ATOM 1802 H SER A 116     | -27.547 | -16.460 | 18.559 | 1.00 | 37.65 |     | H0 |
| ANISOU 1802 H SER A 116   | 4650    | 5020    | 4640   | 90   | 780   | 50  | H0 |
| ATOM 1803 HA SER A 116    | -28.251 | -17.895 | 20.792 | 1.00 | 37.57 |     | H0 |
| ANISOU 1803 HA SER A 116  | 4600    | 5050    | 4620   | 190  | 660   | 180 | H0 |
| ATOM 1804 HB2 SER A 116   | -25.948 | -17.391 | 20.308 | 1.00 | 39.19 |     | H0 |
| ANISOU 1804 HB2 SER A 116 | 4620    | 5430    | 4850   | 210  | 710   | 130 | H0 |
| ATOM 1805 HB3 SER A 116   | -26.263 | -15.871 | 20.673 | 1.00 | 38.63 |     | H0 |
| ANISOU 1805 HB3 SER A 116 | 4550    | 5410    | 4730   | 60   | 700   | 60  | H0 |



|                            |         |         |        |      |       |     |    |
|----------------------------|---------|---------|--------|------|-------|-----|----|
| ATOM 1806 N ILE A 117      | -29.704 | -16.335 | 22.024 | 1.00 | 36.29 | N0  |    |
| ANISOU 1806 N ILE A 117    | 4480    | 4930    | 4370   | 50   | 590   | 150 | N0 |
| ATOM 1807 CA ILE A 117     | -30.769 | -15.485 | 22.624 | 1.00 | 35.68 | C0  |    |
| ANISOU 1807 CA ILE A 117   | 4450    | 4860    | 4250   | -30  | 560   | 130 | C0 |
| ATOM 1808 C ILE A 117      | -30.575 | -15.472 | 24.140 | 1.00 | 36.27 | C0  |    |
| ANISOU 1808 C ILE A 117    | 4440    | 5050    | 4290   | -30  | 500   | 160 | C0 |
| ATOM 1809 O ILE A 117      | -30.382 | -16.561 | 24.728 | 1.00 | 36.77 | O0  |    |
| ANISOU 1809 O ILE A 117    | 4480    | 5140    | 4350   | 40   | 470   | 230 | O0 |
| ATOM 1810 CB ILE A 117     | -32.164 | -16.000 | 22.215 | 1.00 | 35.67 | C0  |    |
| ANISOU 1810 CB ILE A 117   | 4550    | 4750    | 4250   | -20  | 560   | 140 | C0 |
| ATOM 1811 CG1 ILE A 117    | -32.376 | -15.901 | 20.700 | 1.00 | 35.72 | C0  |    |
| ANISOU 1811 CG1 ILE A 117  | 4630    | 4660    | 4280   | -20  | 610   | 100 | C0 |
| ATOM 1812 CG2 ILE A 117    | -33.260 | -15.275 | 22.982 | 1.00 | 35.44 | C0  |    |
| ANISOU 1812 CG2 ILE A 117  | 4550    | 4740    | 4180   | -70  | 520   | 130 | C0 |
| ATOM 1813 CD1 ILE A 117    | -33.609 | -16.621 | 20.202 | 1.00 | 35.53 | C0  |    |
| ANISOU 1813 CD1 ILE A 117  | 4690    | 4560    | 4250   | -10  | 610   | 110 | C0 |
| ATOM 1814 H ILE A 117      | -29.671 | -17.172 | 22.384 | 1.00 | 36.52 | H0  |    |
| ANISOU 1814 H ILE A 117    | 4500    | 4960    | 4410   | 100  | 570   | 200 | H0 |
| ATOM 1815 HA ILE A 117     | -30.667 | -14.578 | 22.289 | 1.00 | 35.67 | H0  |    |
| ANISOU 1815 HA ILE A 117   | 4460    | 4860    | 4240   | -80  | 580   | 80  | H0 |
| ATOM 1816 HB ILE A 117     | -32.210 | -16.958 | 22.459 | 1.00 | 35.91 | H0  |    |
| ANISOU 1816 HB ILE A 117   | 4580    | 4760    | 4300   | 30   | 550   | 190 | H0 |
| ATOM 1817 HG12 ILE A 117   | -32.444 | -14.954 | 20.454 | 1.00 | 35.47 | H0  |    |
| ANISOU 1817 HG12 ILE A 117 | 4620    | 4630    | 4230   | -60  | 620   | 60  | H0 |
| ATOM 1818 HG13 ILE A 117   | -31.592 | -16.275 | 20.246 | 1.00 | 36.04 | H0  |    |
| ANISOU 1818 HG13 ILE A 117 | 4650    | 4700    | 4350   | 10   | 640   | 100 | H0 |
| ATOM 1819 HG21 ILE A 117   | -33.231 | -15.537 | 23.919 | 1.00 | 35.60 | H0  |    |
| ANISOU 1819 HG21 ILE A 117 | 4530    | 4820    | 4180   | -70  | 490   | 160 | H0 |
| ATOM 1820 HG22 ILE A 117   | -34.129 | -15.507 | 22.612 | 1.00 | 35.03 | H0  |    |
| ANISOU 1820 HG22 ILE A 117 | 4550    | 4640    | 4120   | -70  | 530   | 120 | H0 |
| ATOM 1821 HG23 ILE A 117   | -33.126 | -14.314 | 22.912 | 1.00 | 35.28 | H0  |    |
| ANISOU 1821 HG23 ILE A 117 | 4530    | 4740    | 4140   | -110 | 530   | 90  | H0 |
| ATOM 1822 HD11 ILE A 117   | -33.681 | -17.486 | 20.641 | 1.00 | 35.72 | H0  |    |
| ANISOU 1822 HD11 ILE A 117 | 4710    | 4570    | 4290   | 20   | 590   | 150 | H0 |
| ATOM 1823 HD12 ILE A 117   | -33.544 | -16.751 | 19.240 | 1.00 | 35.48 | H0  |    |
| ANISOU 1823 HD12 ILE A 117 | 4720    | 4500    | 4260   | 0    | 640   | 90  | H0 |
| ATOM 1824 HD13 ILE A 117   | -34.400 | -16.090 | 20.402 | 1.00 | 35.13 | H0  |    |
| ANISOU 1824 HD13 ILE A 117 | 4660    | 4510    | 4170   | -40  | 590   | 90  | H0 |
| ATOM 1825 N ARG A 118      | -30.589 | -14.279 | 24.733 | 1.00 | 35.77 | N0  |    |
| ANISOU 1825 N ARG A 118    | 4360    | 5060    | 4180   | -120 | 490   | 110 | N0 |
| ATOM 1826 CA ARG A 118     | -30.785 | -14.079 | 26.190 | 1.00 | 35.79 | C0  |    |
| ANISOU 1826 CA ARG A 118   | 4310    | 5160    | 4120   | -150 | 430   | 120 | C0 |
| ATOM 1827 C ARG A 118      | -32.258 | -13.717 | 26.390 | 1.00 | 35.22 | C0  |    |
| ANISOU 1827 C ARG A 118    | 4330    | 5020    | 4030   | -180 | 430   | 110 | C0 |
| ATOM 1828 O ARG A 118      | -32.727 | -12.786 | 25.711 | 1.00 | 34.43 | O0  |    |
| ANISOU 1828 O ARG A 118    | 4300    | 4850    | 3930   | -220 | 470   | 50  | O0 |
| ATOM 1829 CB ARG A 118     | -29.859 | -12.991 | 26.735 | 1.00 | 36.22 | C0  |    |
| ANISOU 1829 CB ARG A 118   | 4280    | 5340    | 4140   | -240 | 430   | 60  | C0 |
| ATOM 1830 CG ARG A 118     | -30.226 | -12.530 | 28.138 | 1.00 | 36.58 | C0  |    |
| ANISOU 1830 CG ARG A 118   | 4300    | 5490    | 4110   | -290 | 390   | 40  | C0 |
| ATOM 1831 CD ARG A 118     | -29.108 | -11.766 | 28.810 | 1.00 | 37.50 | C0  |    |
| ANISOU 1831 CD ARG A 118   | 4310    | 5760    | 4180   | -370 | 380   | -20 | C0 |
| ATOM 1832 NE ARG A 118     | -29.380 | -11.531 | 30.221 | 1.00 | 38.21 | N0  |    |
| ANISOU 1832 NE ARG A 118   | 4360    | 5970    | 4190   | -420 | 330   | -20 | N0 |

|                            |         |         |        |      |       |      |    |
|----------------------------|---------|---------|--------|------|-------|------|----|
| ATOM 1833 CZ ARG A 118     | -28.549 | -10.913 | 31.061 | 1.00 | 39.20 |      | C0 |
| ANISOU 1833 CZ ARG A 118   | 4390    | 6260    | 4250   | -500 | 300   | -80  | C0 |
| ATOM 1834 NH1 ARG A 118    | -27.375 | -10.477 | 30.636 | 1.00 | 40.00 |      | N0 |
| ANISOU 1834 NH1 ARG A 118  | 4400    | 6440    | 4360   | -560 | 330   | -140 | N0 |
| ATOM 1835 NH2 ARG A 118    | -28.884 | -10.754 | 32.330 | 1.00 | 39.29 |      | N0 |
| ANISOU 1835 NH2 ARG A 118  | 4380    | 6380    | 4170   | -540 | 260   | -80  | N0 |
| ATOM 1836 H ARG A 118      | -30.478 | -13.502 | 24.270 | 1.00 | 35.69 |      | H0 |
| ANISOU 1836 H ARG A 118    | 4360    | 5030    | 4170   | -170 | 520   | 60   | H0 |
| ATOM 1837 HA ARG A 118     | -30.594 | -14.923 | 26.652 | 1.00 | 36.23 |      | H0 |
| ANISOU 1837 HA ARG A 118   | 4330    | 5250    | 4180   | -90  | 400   | 180  | H0 |
| ATOM 1838 HB2 ARG A 118    | -28.941 | -13.334 | 26.741 | 1.00 | 36.93 |      | H0 |
| ANISOU 1838 HB2 ARG A 118  | 4290    | 5510    | 4240   | -210 | 430   | 70   | H0 |
| ATOM 1839 HB3 ARG A 118    | -29.889 | -12.220 | 26.130 | 1.00 | 36.06 |      | H0 |
| ANISOU 1839 HB3 ARG A 118  | 4300    | 5270    | 4130   | -290 | 480   | 0    | H0 |
| ATOM 1840 HG2 ARG A 118    | -31.019 | -11.954 | 28.093 | 1.00 | 36.03 |      | H0 |
| ANISOU 1840 HG2 ARG A 118  | 4300    | 5360    | 4030   | -330 | 410   | 10   | H0 |
| ATOM 1841 HG3 ARG A 118    | -30.451 | -13.312 | 28.686 | 1.00 | 36.67 |      | H0 |
| ANISOU 1841 HG3 ARG A 118  | 4300    | 5530    | 4110   | -240 | 350   | 110  | H0 |
| ATOM 1842 HD2 ARG A 118    | -28.273 | -12.273 | 28.722 | 1.00 | 38.15 |      | H0 |
| ANISOU 1842 HD2 ARG A 118  | 4310    | 5920    | 4270   | -330 | 360   | 10   | H0 |
| ATOM 1843 HD3 ARG A 118    | -28.988 | -10.905 | 28.356 | 1.00 | 37.52 |      | H0 |
| ANISOU 1843 HD3 ARG A 118  | 4340    | 5730    | 4190   | -450 | 420   | -90  | H0 |
| ATOM 1844 HE ARG A 118     | -30.142 | -11.805 | 30.537 | 1.00 | 37.76 |      | H0 |
| ANISOU 1844 HE ARG A 118   | 4350    | 5880    | 4120   | -390 | 310   | 10   | H0 |
| ATOM 1845 HH11 ARG A 118   | -27.141 | -10.581 | 29.797 | 1.00 | 39.74 |      | H0 |
| ANISOU 1845 HH11 ARG A 118 | 4380    | 6340    | 4380   | -540 | 360   | -140 | H0 |
| ATOM 1846 HH12 ARG A 118   | -26.830 | -10.074 | 31.197 | 1.00 | 40.74 |      | H0 |
| ANISOU 1846 HH12 ARG A 118 | 4420    | 6660    | 4400   | -630 | 310   | -180 | H0 |
| ATOM 1847 HH21 ARG A 118   | -29.663 | -11.042 | 32.619 | 1.00 | 38.99 |      | H0 |
| ANISOU 1847 HH21 ARG A 118 | 4390    | 6290    | 4130   | -510 | 250   | -40  | H0 |
| ATOM 1848 HH22 ARG A 118   | -28.332 | -10.347 | 32.883 | 1.00 | 40.17 |      | H0 |
| ANISOU 1848 HH22 ARG A 118 | 4420    | 6610    | 4230   | -600 | 240   | -130 | H0 |
| ATOM 1849 N GLN A 119      | -32.957 | -14.439 | 27.263 | 1.00 | 35.00 |      | N0 |
| ANISOU 1849 N GLN A 119    | 4310    | 5010    | 3970   | -150 | 390   | 170  | N0 |
| ATOM 1850 CA GLN A 119     | -34.421 | -14.290 | 27.453 | 1.00 | 35.17 |      | C0 |
| ANISOU 1850 CA GLN A 119   | 4410    | 4980    | 3970   | -180 | 390   | 160  | C0 |
| ATOM 1851 C GLN A 119      | -34.796 | -14.734 | 28.872 | 1.00 | 36.31 |      | C0 |
| ANISOU 1851 C GLN A 119    | 4520    | 5210    | 4060   | -180 | 350   | 210  | C0 |
| ATOM 1852 O GLN A 119      | -34.180 | -15.702 | 29.371 | 1.00 | 35.84 |      | O0 |
| ANISOU 1852 O GLN A 119    | 4430    | 5200    | 4000   | -130 | 320   | 280  | O0 |
| ATOM 1853 CB GLN A 119     | -35.171 | -15.106 | 26.397 | 1.00 | 34.49 |      | C0 |
| ANISOU 1853 CB GLN A 119   | 4390    | 4780    | 3930   | -140 | 420   | 180  | C0 |
| ATOM 1854 CG GLN A 119     | -36.606 | -14.648 | 26.198 | 1.00 | 34.13 |      | C0 |
| ANISOU 1854 CG GLN A 119   | 4400    | 4700    | 3870   | -170 | 420   | 140  | C0 |
| ATOM 1855 CD GLN A 119     | -37.264 | -15.244 | 24.977 | 1.00 | 33.38 |      | C0 |
| ANISOU 1855 CD GLN A 119   | 4370    | 4510    | 3800   | -140 | 450   | 140  | C0 |
| ATOM 1856 OE1 GLN A 119    | -36.790 | -16.219 | 24.401 | 1.00 | 33.24 |      | O0 |
| ANISOU 1856 OE1 GLN A 119  | 4360    | 4440    | 3820   | -110 | 460   | 170  | O0 |
| ATOM 1857 NE2 GLN A 119    | -38.391 | -14.669 | 24.590 | 1.00 | 33.11 |      | N0 |
| ANISOU 1857 NE2 GLN A 119  | 4370    | 4470    | 3750   | -160 | 450   | 90   | N0 |
| ATOM 1858 H GLN A 119      | -32.575 | -15.073 | 27.795 | 1.00 | 35.70 |      | H0 |
| ANISOU 1858 H GLN A 119    | 4360    | 5150    | 4050   | -120 | 370   | 220  | H0 |
| ATOM 1859 HA GLN A 119     | -34.654 | -13.339 | 27.347 | 1.00 | 34.91 |      | H0 |
| ANISOU 1859 HA GLN A 119   | 4390    | 4950    | 3930   | -220 | 410   | 100  | H0 |

|                            |         |         |        |      |       |      |    |
|----------------------------|---------|---------|--------|------|-------|------|----|
| ATOM 1860 HB2 GLN A 119    | -34.690 | -15.033 | 25.547 | 1.00 | 34.52 | H0   |    |
| ANISOU 1860 HB2 GLN A 119  | 4400    | 4750    | 3970   | -120 | 440   | 160  | H0 |
| ATOM 1861 HB3 GLN A 119    | -35.166 | -16.048 | 26.666 | 1.00 | 34.85 | H0   |    |
| ANISOU 1861 HB3 GLN A 119  | 4440    | 4820    | 3980   | -110 | 400   | 230  | H0 |
| ATOM 1862 HG2 GLN A 119    | -37.131 | -14.891 | 26.991 | 1.00 | 34.10 | H0   |    |
| ANISOU 1862 HG2 GLN A 119  | 4390    | 4730    | 3830   | -180 | 400   | 160  | H0 |
| ATOM 1863 HG3 GLN A 119    | -36.621 | -13.671 | 26.120 | 1.00 | 33.86 | H0   |    |
| ANISOU 1863 HG3 GLN A 119  | 4370    | 4670    | 3820   | -190 | 430   | 90   | H0 |
| ATOM 1864 HE21 GLN A 119   | -38.858 | -15.014 | 23.923 | 1.00 | 32.99 | H0   |    |
| ANISOU 1864 HE21 GLN A 119 | 4380    | 4420    | 3740   | -150 | 460   | 90   | H0 |
| ATOM 1865 HE22 GLN A 119   | -38.680 | -13.939 | 24.997 | 1.00 | 33.06 | H0   |    |
| ANISOU 1865 HE22 GLN A 119 | 4350    | 4490    | 3720   | -170 | 450   | 70   | H0 |
| ATOM 1866 N ARG A 120      | -35.763 | -14.043 | 29.487 | 1.00 | 36.71 | N0   |    |
| ANISOU 1866 N ARG A 120    | 4600    | 5280    | 4070   | -230 | 350   | 170  | N0 |
| ATOM 1867 CA AARG A 120    | -36.271 | -14.373 | 30.845 | 0.50 | 37.02 | C0   |    |
| ANISOU 1867 CA AARG A 120  | 4620    | 5410    | 4040   | -250 | 320   | 200  | C0 |
| ATOM 1868 CA BARG A 120    | -36.283 | -14.361 | 30.845 | 0.50 | 37.30 | C0   |    |
| ANISOU 1868 CA BARG A 120  | 4660    | 5440    | 4070   | -250 | 320   | 200  | C0 |
| ATOM 1869 C ARG A 120      | -37.546 | -15.218 | 30.709 | 1.00 | 36.47 | C0   |    |
| ANISOU 1869 C ARG A 120    | 4610    | 5270    | 3980   | -240 | 330   | 240  | C0 |
| ATOM 1870 O ARG A 120      | -38.330 | -14.975 | 29.772 | 1.00 | 35.86 | O0   |    |
| ANISOU 1870 O ARG A 120    | 4570    | 5120    | 3930   | -240 | 360   | 200  | O0 |
| ATOM 1871 CB AARG A 120    | -36.453 | -13.081 | 31.647 | 0.50 | 37.56 | C0   |    |
| ANISOU 1871 CB AARG A 120  | 4670    | 5550    | 4050   | -320 | 320   | 130  | C0 |
| ATOM 1872 CB BARG A 120    | -36.582 | -13.084 | 31.637 | 0.50 | 38.20 | C0   |    |
| ANISOU 1872 CB BARG A 120  | 4760    | 5630    | 4130   | -320 | 320   | 130  | C0 |
| ATOM 1873 CG AARG A 120    | -35.218 | -12.189 | 31.625 | 0.50 | 38.13 | C0   |    |
| ANISOU 1873 CG AARG A 120  | 4690    | 5680    | 4110   | -360 | 320   | 70   | C0 |
| ATOM 1874 CG BARG A 120    | -35.404 | -12.128 | 31.753 | 0.50 | 39.14 | C0   |    |
| ANISOU 1874 CG BARG A 120  | 4830    | 5810    | 4230   | -370 | 320   | 70   | C0 |
| ATOM 1875 CD AARG A 120    | -35.255 | -11.035 | 32.607 | 0.50 | 38.57 | C0   |    |
| ANISOU 1875 CD AARG A 120  | 4740    | 5820    | 4100   | -440 | 320   | -10  | C0 |
| ATOM 1876 CD BARG A 120    | -35.433 | -11.331 | 33.044 | 0.50 | 40.11 | C0   |    |
| ANISOU 1876 CD BARG A 120  | 4920    | 6050    | 4270   | -440 | 310   | 10   | C0 |
| ATOM 1877 NE AARG A 120    | -36.228 | -10.012 | 32.255 | 0.50 | 38.04 | N0   |    |
| ANISOU 1877 NE AARG A 120  | 4750    | 5670    | 4040   | -470 | 370   | -90  | N0 |
| ATOM 1878 NE BARG A 120    | -34.946 | -12.112 | 34.172 | 0.50 | 41.30 | N0   |    |
| ANISOU 1878 NE BARG A 120  | 5000    | 6330    | 4360   | -430 | 250   | 80   | N0 |
| ATOM 1879 CZ AARG A 120    | -36.041 | -9.081  | 31.333 | 0.50 | 37.60 | C0   |    |
| ANISOU 1879 CZ AARG A 120  | 4740    | 5520    | 4020   | -480 | 430   | -150 | C0 |
| ATOM 1880 CZ BARG A 120    | -35.647 | -12.388 | 35.266 | 0.50 | 41.21 | C0   |    |
| ANISOU 1880 CZ BARG A 120  | 5000    | 6380    | 4280   | -440 | 230   | 110  | C0 |
| ATOM 1881 NH1AARG A 120    | -36.989 | -8.189  | 31.104 | 0.50 | 37.28 | N0   |    |
| ANISOU 1881 NH1AARG A 120  | 4780    | 5400    | 3980   | -470 | 470   | -200 | N0 |
| ATOM 1882 NH1BARG A 120    | -35.101 | -13.111 | 36.228 | 0.50 | 42.28 | N0   |    |
| ANISOU 1882 NH1BARG A 120  | 5080    | 6640    | 4340   | -420 | 180   | 190  | N0 |
| ATOM 1883 NH2AARG A 120    | -34.921 | -9.053  | 30.632 | 0.50 | 37.77 | N0   |    |
| ANISOU 1883 NH2AARG A 120  | 4740    | 5530    | 4080   | -490 | 440   | -150 | N0 |
| ATOM 1884 NH2BARG A 120    | -36.879 | -11.932 | 35.401 | 0.50 | 40.44 | N0   |    |
| ANISOU 1884 NH2BARG A 120  | 4960    | 6240    | 4170   | -470 | 270   | 70   | N0 |
| ATOM 1885 H ARG A 120      | -36.180 | -13.322 | 29.118 | 1.00 | 36.27 | H0   |    |
| ANISOU 1885 H ARG A 120    | 4570    | 5200    | 4010   | -260 | 370   | 120  | H0 |
| ATOM 1886 HA AARG A 120    | -35.590 | -14.918 | 31.295 | 0.50 | 37.59 | H0   |    |
| ANISOU 1886 HA AARG A 120  | 4650    | 5530    | 4100   | -230 | 290   | 260  | H0 |

|                            |         |         |        |      |       |      |    |
|----------------------------|---------|---------|--------|------|-------|------|----|
| ATOM 1887 HA BARG A 120    | -35.600 | -14.877 | 31.325 | 0.50 | 37.83 | H0   |    |
| ANISOU 1887 HA BARG A 120  | 4680    | 5560    | 4130   | -230 | 290   | 250  | H0 |
| ATOM 1888 HB2AARG A 120    | -37.212 | -12.584 | 31.277 | 0.50 | 37.10 | H0   |    |
| ANISOU 1888 HB2AARG A 120  | 4650    | 5440    | 4000   | -330 | 340   | 80   | H0 |
| ATOM 1889 HB2BARG A 120    | -37.326 | -12.616 | 31.204 | 0.50 | 37.70 | H0   |    |
| ANISOU 1889 HB2BARG A 120  | 4740    | 5510    | 4080   | -330 | 340   | 80   | H0 |
| ATOM 1890 HB3AARG A 120    | -36.663 | -13.312 | 32.576 | 0.50 | 37.87 | H0   |    |
| ANISOU 1890 HB3AARG A 120  | 4690    | 5660    | 4040   | -340 | 300   | 150  | H0 |
| ATOM 1891 HB3BARG A 120    | -36.871 | -13.338 | 32.539 | 0.50 | 38.46 | H0   |    |
| ANISOU 1891 HB3BARG A 120  | 4780    | 5720    | 4110   | -340 | 300   | 150  | H0 |
| ATOM 1892 HG2AARG A 120    | -34.429 | -12.737 | 31.819 | 0.50 | 38.53 | H0   |    |
| ANISOU 1892 HG2AARG A 120  | 4690    | 5790    | 4160   | -340 | 290   | 110  | H0 |
| ATOM 1893 HG2BARG A 120    | -34.568 | -12.638 | 31.712 | 0.50 | 39.44 | H0   |    |
| ANISOU 1893 HG2BARG A 120  | 4820    | 5880    | 4280   | -340 | 300   | 100  | H0 |
| ATOM 1894 HG3AARG A 120    | -35.108 | -11.823 | 30.722 | 0.50 | 37.75 | H0   |    |
| ANISOU 1894 HG3AARG A 120  | 4670    | 5560    | 4110   | -360 | 350   | 40   | H0 |
| ATOM 1895 HG3BARG A 120    | -35.417 | -11.506 | 30.995 | 0.50 | 38.78 | H0   |    |
| ANISOU 1895 HG3BARG A 120  | 4810    | 5700    | 4220   | -380 | 350   | 20   | H0 |
| ATOM 1896 HD2AARG A 120    | -35.467 | -11.383 | 33.499 | 0.50 | 38.89 | H0   |    |
| ANISOU 1896 HD2AARG A 120  | 4750    | 5930    | 4090   | -450 | 290   | 20   | H0 |
| ATOM 1897 HD2BARG A 120    | -34.876 | -10.529 | 32.942 | 0.50 | 40.34 | H0   |    |
| ANISOU 1897 HD2BARG A 120  | 4940    | 6090    | 4300   | -480 | 320   | -50  | H0 |
| ATOM 1898 HD3AARG A 120    | -34.365 | -10.626 | 32.651 | 0.50 | 38.97 | H0   |    |
| ANISOU 1898 HD3AARG A 120  | 4750    | 5920    | 4140   | -480 | 320   | -40  | H0 |
| ATOM 1899 HD3BARG A 120    | -36.352 | -11.040 | 33.225 | 0.50 | 39.87 | H0   |    |
| ANISOU 1899 HD3BARG A 120  | 4930    | 5990    | 4230   | -450 | 320   | -10  | H0 |
| ATOM 1900 HE AARG A 120    | -36.978 | -9.995  | 32.699 | 0.50 | 37.95 | H0   |    |
| ANISOU 1900 HE AARG A 120  | 4750    | 5660    | 4000   | -470 | 370   | -90  | H0 |
| ATOM 1901 HE BARG A 120    | -34.138 | -12.432 | 34.123 | 0.50 | 41.46 | H0   |    |
| ANISOU 1901 HE BARG A 120  | 4980    | 6390    | 4380   | -410 | 230   | 110  | H0 |
| ATOM 1902 HH11AARG A 120   | -37.735 | -8.215  | 31.567 | 0.50 | 37.32 | H0   |    |
| ANISOU 1902 HH11AARG A 120 | 4790    | 5420    | 3960   | -460 | 470   | -200 | H0 |
| ATOM 1903 HH11BARG A 120   | -34.280 | -13.411 | 36.137 | 0.50 | 42.58 | H0   |    |
| ANISOU 1903 HH11BARG A 120 | 5070    | 6720    | 4390   | -400 | 150   | 220  | H0 |
| ATOM 1904 HH12AARG A 120   | -36.872 | -7.576  | 30.485 | 0.50 | 37.31 | H0   |    |
| ANISOU 1904 HH12AARG A 120 | 4830    | 5340    | 4010   | -480 | 510   | -230 | H0 |
| ATOM 1905 HH12BARG A 120   | -35.562 | -13.290 | 36.955 | 0.50 | 42.47 | H0   |    |
| ANISOU 1905 HH12BARG A 120 | 5110    | 6710    | 4310   | -440 | 170   | 210  | H0 |
| ATOM 1906 HH21AARG A 120   | -34.290 | -9.647  | 30.790 | 0.50 | 37.99 | H0   |    |
| ANISOU 1906 HH21AARG A 120 | 4710    | 5620    | 4110   | -480 | 410   | -110 | H0 |
| ATOM 1907 HH21BARG A 120   | -37.240 | -11.449 | 34.759 | 0.50 | 40.12 | H0   |    |
| ANISOU 1907 HH21BARG A 120 | 4950    | 6120    | 4170   | -470 | 300   | 20   | H0 |
| ATOM 1908 HH22AARG A 120   | -34.804 | -8.434  | 30.017 | 0.50 | 37.70 | H0   |    |
| ANISOU 1908 HH22AARG A 120 | 4770    | 5460    | 4090   | -500 | 470   | -190 | H0 |
| ATOM 1909 HH22BARG A 120   | -37.337 | -12.115 | 36.131 | 0.50 | 40.85 | H0   |    |
| ANISOU 1909 HH22BARG A 120 | 5010    | 6340    | 4170   | -480 | 260   | 80   | H0 |
| ATOM 1910 N PHE A 121      | -37.717 | -16.190 | 31.604 | 1.00 | 36.89 | N0   |    |
| ANISOU 1910 N PHE A 121    | 4660    | 5360    | 3990   | -240 | 310   | 320  | N0 |
| ATOM 1911 CA PHE A 121     | -38.834 | -17.167 | 31.574 | 1.00 | 36.30 | C0   |    |
| ANISOU 1911 CA PHE A 121   | 4650    | 5220    | 3920   | -250 | 330   | 360  | C0 |
| ATOM 1912 C PHE A 121      | -39.492 | -17.235 | 32.949 | 1.00 | 37.13 | C0   |    |
| ANISOU 1912 C PHE A 121    | 4750    | 5410    | 3950   | -290 | 320   | 380  | C0 |
| ATOM 1913 O PHE A 121      | -38.786 | -17.086 | 33.968 | 1.00 | 37.19 | O0   |    |
| ANISOU 1913 O PHE A 121    | 4720    | 5520    | 3900   | -290 | 290   | 420  | O0 |

|                           |         |         |        |      |       |     |    |
|---------------------------|---------|---------|--------|------|-------|-----|----|
| ATOM 1914 CB PHE A 121    | -38.333 | -18.542 | 31.127 | 1.00 | 36.23 | C0  |    |
| ANISOU 1914 CB PHE A 121  | 4680    | 5120    | 3960   | -190 | 350   | 440 | C0 |
| ATOM 1915 CG PHE A 121    | -37.826 | -18.557 | 29.710 | 1.00 | 35.59 | C0  |    |
| ANISOU 1915 CG PHE A 121  | 4610    | 4950    | 3960   | -150 | 370   | 410 | C0 |
| ATOM 1916 CD1 PHE A 121   | -38.696 | -18.763 | 28.652 | 1.00 | 35.19 | C0  |    |
| ANISOU 1916 CD1 PHE A 121 | 4610    | 4810    | 3940   | -180 | 400   | 360 | C0 |
| ATOM 1917 CD2 PHE A 121   | -36.491 | -18.317 | 29.430 | 1.00 | 35.46 | C0  |    |
| ANISOU 1917 CD2 PHE A 121 | 4550    | 4960    | 3960   | -100 | 350   | 410 | C0 |
| ATOM 1918 CE1 PHE A 121   | -38.234 | -18.746 | 27.345 | 1.00 | 34.86 | C0  |    |
| ANISOU 1918 CE1 PHE A 121 | 4590    | 4700    | 3960   | -140 | 420   | 330 | C0 |
| ATOM 1919 CE2 PHE A 121   | -36.030 | -18.308 | 28.122 | 1.00 | 35.50 | C0  |    |
| ANISOU 1919 CE2 PHE A 121 | 4570    | 4890    | 4030   | -70  | 380   | 380 | C0 |
| ATOM 1920 CZ PHE A 121    | -36.904 | -18.520 | 27.082 | 1.00 | 34.72 | C0  |    |
| ANISOU 1920 CZ PHE A 121  | 4530    | 4690    | 3970   | -90  | 420   | 340 | C0 |
| ATOM 1921 H PHE A 121     | -37.154 | -16.327 | 32.308 | 1.00 | 37.29 | H0  |    |
| ANISOU 1921 H PHE A 121   | 4680    | 5470    | 4010   | -230 | 290   | 350 | H0 |
| ATOM 1922 HA PHE A 121    | -39.510 | -16.853 | 30.921 | 1.00 | 35.91 | H0  |    |
| ANISOU 1922 HA PHE A 121  | 4620    | 5130    | 3900   | -260 | 350   | 310 | H0 |
| ATOM 1923 HB2 PHE A 121   | -37.612 | -18.823 | 31.728 | 1.00 | 36.87 | H0  |    |
| ANISOU 1923 HB2 PHE A 121 | 4740    | 5250    | 4020   | -160 | 320   | 500 | H0 |
| ATOM 1924 HB3 PHE A 121   | -39.066 | -19.186 | 31.212 | 1.00 | 36.47 | H0  |    |
| ANISOU 1924 HB3 PHE A 121 | 4760    | 5120    | 3980   | -210 | 370   | 460 | H0 |
| ATOM 1925 HD1 PHE A 121   | -39.611 | -18.915 | 28.825 | 1.00 | 35.15 | H0  |    |
| ANISOU 1925 HD1 PHE A 121 | 4630    | 4810    | 3920   | -220 | 410   | 350 | H0 |
| ATOM 1926 HD2 PHE A 121   | -35.887 | -18.167 | 30.140 | 1.00 | 36.05 | H0  |    |
| ANISOU 1926 HD2 PHE A 121 | 4580    | 5110    | 4010   | -80  | 330   | 440 | H0 |
| ATOM 1927 HE1 PHE A 121   | -38.832 | -18.898 | 26.638 | 1.00 | 34.59 | H0  |    |
| ANISOU 1927 HE1 PHE A 121 | 4580    | 4620    | 3940   | -160 | 440   | 300 | H0 |
| ATOM 1928 HE2 PHE A 121   | -35.117 | -18.152 | 27.946 | 1.00 | 35.54 | H0  |    |
| ANISOU 1928 HE2 PHE A 121 | 4530    | 4920    | 4060   | -40  | 380   | 380 | H0 |
| ATOM 1929 HZ PHE A 121    | -36.590 | -18.518 | 26.191 | 1.00 | 34.69 | H0  |    |
| ANISOU 1929 HZ PHE A 121  | 4540    | 4640    | 4000   | -70  | 430   | 320 | H0 |
| ATOM 1930 N SER A 122     | -40.815 | -17.409 | 32.940 | 1.00 | 37.05 | N0  |    |
| ANISOU 1930 N SER A 122   | 4770    | 5390    | 3930   | -340 | 350   | 360 | N0 |
| ATOM 1931 CA SER A 122    | -41.640 | -17.876 | 34.079 | 1.00 | 37.63 | C0  |    |
| ANISOU 1931 CA SER A 122  | 4850    | 5520    | 3930   | -390 | 370   | 400 | C0 |
| ATOM 1932 C SER A 122     | -41.664 | -19.404 | 34.036 | 1.00 | 38.73 | C0  |    |
| ANISOU 1932 C SER A 122   | 5060    | 5570    | 4080   | -390 | 390   | 490 | C0 |
| ATOM 1933 O SER A 122     | -42.191 | -19.951 | 33.053 | 1.00 | 39.37 | O0  |    |
| ANISOU 1933 O SER A 122   | 5180    | 5560    | 4220   | -400 | 430   | 470 | O0 |
| ATOM 1934 CB SER A 122    | -43.033 | -17.308 | 34.006 | 1.00 | 37.15 | C0  |    |
| ANISOU 1934 CB SER A 122  | 4780    | 5490    | 3850   | -450 | 400   | 310 | C0 |
| ATOM 1935 OG SER A 122    | -43.887 | -17.946 | 34.936 | 1.00 | 37.52 | O0  |    |
| ANISOU 1935 OG SER A 122  | 4840    | 5580    | 3840   | -510 | 420   | 350 | O0 |
| ATOM 1936 H SER A 122     | -41.321 | -17.249 | 32.200 | 1.00 | 36.61 | H0  |    |
| ANISOU 1936 H SER A 122   | 4720    | 5290    | 3900   | -350 | 370   | 320 | H0 |
| ATOM 1937 HA SER A 122    | -41.212 | -17.582 | 34.926 | 1.00 | 38.04 | H0  |    |
| ANISOU 1937 HA SER A 122  | 4880    | 5640    | 3930   | -390 | 340   | 410 | H0 |
| ATOM 1938 HB2 SER A 122   | -43.002 | -16.343 | 34.195 | 1.00 | 36.91 | H0  |    |
| ANISOU 1938 HB2 SER A 122 | 4710    | 5510    | 3800   | -450 | 390   | 260 | H0 |
| ATOM 1939 HB3 SER A 122   | -43.389 | -17.431 | 33.097 | 1.00 | 36.78 | H0  |    |
| ANISOU 1939 HB3 SER A 122 | 4740    | 5380    | 3850   | -440 | 410   | 280 | H0 |
| ATOM 1940 N CYS A 123     | -41.082 | -20.064 | 35.033 | 1.00 | 39.53 | N0  |    |
| ANISOU 1940 N CYS A 123   | 5180    | 5700    | 4130   | -360 | 380   | 590 | N0 |

|                           |         |         |        |      |       |      |    |
|---------------------------|---------|---------|--------|------|-------|------|----|
| ATOM 1941 CA CYS A 123    | -40.999 | -21.544 | 35.101 | 1.00 | 41.32 | C0   |    |
| ANISOU 1941 CA CYS A 123  | 5510    | 5830    | 4370   | -340 | 410   | 700  | C0 |
| ATOM 1942 C CYS A 123     | -40.637 | -21.968 | 36.529 | 1.00 | 41.84 | C0   |    |
| ANISOU 1942 C CYS A 123   | 5590    | 5970    | 4330   | -320 | 390   | 810  | C0 |
| ATOM 1943 O CYS A 123     | -40.323 | -21.086 | 37.347 | 1.00 | 41.81 | O0   |    |
| ANISOU 1943 O CYS A 123   | 5510    | 6110    | 4260   | -330 | 340   | 790  | O0 |
| ATOM 1944 CB CYS A 123    | -39.996 | -22.082 | 34.083 | 1.00 | 41.73 | C0   |    |
| ANISOU 1944 CB CYS A 123  | 5580    | 5770    | 4500   | -250 | 410   | 740  | C0 |
| ATOM 1945 SG CYS A 123    | -38.293 | -21.564 | 34.414 | 1.00 | 44.26 | S0   |    |
| ANISOU 1945 SG CYS A 123  | 5810    | 6190    | 4810   | -140 | 340   | 770  | S0 |
| ATOM 1946 H CYS A 123     | -40.688 | -19.656 | 35.747 | 1.00 | 40.00 | H0   |    |
| ANISOU 1946 H CYS A 123   | 5210    | 5850    | 4140   | -360 | 350   | 600  | H0 |
| ATOM 1947 HA CYS A 123    | -41.888 | -21.908 | 34.882 | 1.00 | 41.13 | H0   |    |
| ANISOU 1947 HA CYS A 123  | 5520    | 5760    | 4350   | -400 | 450   | 680  | H0 |
| ATOM 1948 HB2 CYS A 123   | -40.029 | -23.059 | 34.085 | 1.00 | 42.80 | H0   |    |
| ANISOU 1948 HB2 CYS A 123 | 5790    | 5820    | 4650   | -240 | 440   | 800  | H0 |
| ATOM 1949 HB3 CYS A 123   | -40.247 | -21.774 | 33.189 | 1.00 | 41.45 | H0   |    |
| ANISOU 1949 HB3 CYS A 123 | 5540    | 5700    | 4520   | -270 | 420   | 670  | H0 |
| ATOM 1950 N ASP A 124     | -40.674 | -23.275 | 36.796 | 1.00 | 42.67 | N0   |    |
| ANISOU 1950 N ASP A 124   | 5800    | 5980    | 4430   | -300 | 430   | 930  | N0 |
| ATOM 1951 CA ASP A 124    | -40.476 | -23.878 | 38.141 | 1.00 | 44.10 | C0   |    |
| ANISOU 1951 CA ASP A 124  | 6030    | 6220    | 4500   | -280 | 430   | 1050 | C0 |
| ATOM 1952 C ASP A 124     | -38.996 | -23.804 | 38.545 | 1.00 | 44.85 | C0   |    |
| ANISOU 1952 C ASP A 124   | 6070    | 6400    | 4570   | -150 | 350   | 1130 | C0 |
| ATOM 1953 O ASP A 124     | -38.198 | -24.597 | 38.019 | 1.00 | 46.25 | O0   |    |
| ANISOU 1953 O ASP A 124   | 6290    | 6480    | 4800   | -30  | 360   | 1210 | O0 |
| ATOM 1954 CB ASP A 124    | -40.988 | -25.320 | 38.152 | 1.00 | 44.89 | C0   |    |
| ANISOU 1954 CB ASP A 124  | 6280    | 6160    | 4610   | -300 | 510   | 1150 | C0 |
| ATOM 1955 CG ASP A 124    | -41.192 | -25.891 | 39.543 | 1.00 | 46.69 | C0   |    |
| ANISOU 1955 CG ASP A 124  | 6590    | 6440    | 4720   | -320 | 530   | 1270 | C0 |
| ATOM 1956 OD1 ASP A 124   | -40.876 | -25.180 | 40.522 | 1.00 | 47.12 | O0   |    |
| ANISOU 1956 OD1 ASP A 124 | 6560    | 6660    | 4680   | -300 | 470   | 1280 | O0 |
| ATOM 1957 OD2 ASP A 124   | -41.666 | -27.042 | 39.634 | 1.00 | 47.71 | O0   |    |
| ANISOU 1957 OD2 ASP A 124 | 6860    | 6430    | 4840   | -350 | 610   | 1360 | O0 |
| ATOM 1958 H ASP A 124     | -40.827 | -23.894 | 36.146 | 1.00 | 42.79 | H0   |    |
| ANISOU 1958 H ASP A 124   | 5870    | 5890    | 4500   | -300 | 470   | 940  | H0 |
| ATOM 1959 HA ASP A 124    | -41.006 | -23.357 | 38.790 | 1.00 | 44.00 | H0   |    |
| ANISOU 1959 HA ASP A 124  | 5980    | 6300    | 4430   | -350 | 420   | 1020 | H0 |
| ATOM 1960 HB2 ASP A 124   | -41.843 | -25.358 | 37.678 | 1.00 | 44.62 | H0   |    |
| ANISOU 1960 HB2 ASP A 124 | 6270    | 6080    | 4610   | -390 | 560   | 1080 | H0 |
| ATOM 1961 HB3 ASP A 124   | -40.353 | -25.891 | 37.676 | 1.00 | 45.36 | H0   |    |
| ANISOU 1961 HB3 ASP A 124 | 6390    | 6130    | 4720   | -220 | 520   | 1200 | H0 |
| ATOM 1962 N VAL A 125     | -38.661 | -22.913 | 39.481 | 1.00 | 45.47 | N0   |    |
| ANISOU 1962 N VAL A 125   | 6060    | 6660    | 4560   | -150 | 290   | 1110 | N0 |
| ATOM 1963 CA VAL A 125    | -37.285 | -22.698 | 40.026 | 1.00 | 46.21 | C0   |    |
| ANISOU 1963 CA VAL A 125  | 6070    | 6900    | 4590   | -50  | 210   | 1170 | C0 |
| ATOM 1964 C VAL A 125     | -37.148 | -23.386 | 41.394 | 1.00 | 48.16 | C0   |    |
| ANISOU 1964 C VAL A 125   | 6370    | 7230    | 4700   | 0    | 190   | 1320 | C0 |
| ATOM 1965 O VAL A 125     | -36.063 | -23.286 | 42.000 | 1.00 | 49.48 | O0   |    |
| ANISOU 1965 O VAL A 125   | 6460    | 7540    | 4800   | 90   | 110   | 1380 | O0 |
| ATOM 1966 CB VAL A 125    | -36.978 | -21.189 | 40.116 | 1.00 | 45.58 | C0   |    |
| ANISOU 1966 CB VAL A 125  | 5850    | 6970    | 4490   | -100 | 150   | 1030 | C0 |
| ATOM 1967 CG1 VAL A 125   | -35.646 | -20.894 | 40.791 | 1.00 | 46.66 | C0   |    |
| ANISOU 1967 CG1 VAL A 125 | 5880    | 7290    | 4550   | -30  | 70    | 1070 | C0 |

|                            |         |         |        |      |       |      |    |
|----------------------------|---------|---------|--------|------|-------|------|----|
| ATOM 1968 CG2 VAL A 125    | -37.031 | -20.528 | 38.746 | 1.00 | 44.53 | C0   |    |
| ANISOU 1968 CG2 VAL A 125  | 5690    | 6750    | 4490   | -130 | 170   | 910  | C0 |
| ATOM 1969 H VAL A 125      | -39.277 | -22.359 | 39.860 | 1.00 | 45.04 | H0   |    |
| ANISOU 1969 H VAL A 125    | 5980    | 6670    | 4460   | -230 | 290   | 1050 | H0 |
| ATOM 1970 HA VAL A 125     | -36.646 | -23.105 | 39.414 | 1.00 | 46.40 | H0   |    |
| ANISOU 1970 HA VAL A 125   | 6100    | 6860    | 4680   | 40   | 200   | 1200 | H0 |
| ATOM 1971 HB VAL A 125     | -37.687 | -20.780 | 40.670 | 1.00 | 45.53 | H0   |    |
| ANISOU 1971 HB VAL A 125   | 5850    | 7020    | 4430   | -190 | 160   | 990  | H0 |
| ATOM 1972 HG11 VAL A 125   | -35.715 | -21.067 | 41.744 | 1.00 | 47.50 | H0   |    |
| ANISOU 1972 HG11 VAL A 125 | 6000    | 7490    | 4560   | -30  | 50    | 1130 | H0 |
| ATOM 1973 HG12 VAL A 125   | -35.417 | -19.960 | 40.653 | 1.00 | 46.10 | H0   |    |
| ANISOU 1973 HG12 VAL A 125 | 5740    | 7290    | 4490   | -70  | 50    | 970  | H0 |
| ATOM 1974 HG13 VAL A 125   | -34.953 | -21.459 | 40.406 | 1.00 | 47.05 | H0   |    |
| ANISOU 1974 HG13 VAL A 125 | 5930    | 7300    | 4640   | 70   | 60    | 1130 | H0 |
| ATOM 1975 HG21 VAL A 125   | -36.453 | -21.011 | 38.131 | 1.00 | 44.50 | H0   |    |
| ANISOU 1975 HG21 VAL A 125 | 5690    | 6680    | 4540   | -60  | 180   | 950  | H0 |
| ATOM 1976 HG22 VAL A 125   | -36.730 | -19.605 | 38.817 | 1.00 | 44.07 | H0   |    |
| ANISOU 1976 HG22 VAL A 125 | 5550    | 6780    | 4410   | -160 | 150   | 830  | H0 |
| ATOM 1977 HG23 VAL A 125   | -37.945 | -20.544 | 38.413 | 1.00 | 43.84 | H0   |    |
| ANISOU 1977 HG23 VAL A 125 | 5650    | 6580    | 4430   | -190 | 220   | 870  | H0 |
| ATOM 1978 N SER A 126      | -38.189 | -24.074 | 41.872 | 1.00 | 48.87 | N0   |    |
| ANISOU 1978 N SER A 126    | 6570    | 7240    | 4750   | -70  | 260   | 1370 | N0 |
| ATOM 1979 CA SER A 126     | -38.205 | -24.704 | 43.217 | 1.00 | 50.42 | C0   |    |
| ANISOU 1979 CA SER A 126   | 6840    | 7510    | 4800   | -50  | 250   | 1510 | C0 |
| ATOM 1980 C SER A 126      | -37.168 | -25.834 | 43.265 | 1.00 | 51.63 | C0   |    |
| ANISOU 1980 C SER A 126    | 7060    | 7610    | 4950   | 130  | 230   | 1690 | C0 |
| ATOM 1981 O SER A 126      | -37.108 | -26.615 | 42.291 | 1.00 | 51.38 | O0   |    |
| ANISOU 1981 O SER A 126    | 7110    | 7380    | 5030   | 190  | 290   | 1720 | O0 |
| ATOM 1982 CB SER A 126     | -39.589 | -25.179 | 43.599 | 1.00 | 50.69 | C0   |    |
| ANISOU 1982 CB SER A 126   | 6990    | 7460    | 4810   | -180 | 340   | 1520 | C0 |
| ATOM 1983 OG SER A 126     | -40.061 | -26.163 | 42.696 | 1.00 | 51.20 | O0   |    |
| ANISOU 1983 OG SER A 126   | 7180    | 7300    | 4970   | -190 | 430   | 1550 | O0 |
| ATOM 1984 H SER A 126      | -38.962 | -24.211 | 41.412 | 1.00 | 48.25 | H0   |    |
| ANISOU 1984 H SER A 126    | 6540    | 7060    | 4730   | -140 | 310   | 1330 | H0 |
| ATOM 1985 HA SER A 126     | -37.929 | -24.011 | 43.871 | 1.00 | 50.50 | H0   |    |
| ANISOU 1985 HA SER A 126   | 6770    | 7690    | 4740   | -60  | 190   | 1480 | H0 |
| ATOM 1986 HB2 SER A 126    | -39.565 | -25.555 | 44.509 | 1.00 | 52.00 | H0   |    |
| ANISOU 1986 HB2 SER A 126  | 7210    | 7680    | 4870   | -170 | 340   | 1620 | H0 |
| ATOM 1987 HB3 SER A 126    | -40.207 | -24.414 | 43.602 | 1.00 | 49.99 | H0   |    |
| ANISOU 1987 HB3 SER A 126  | 6850    | 7430    | 4720   | -280 | 350   | 1410 | H0 |
| ATOM 1988 N GLY A 127      | -36.365 | -25.875 | 44.339 | 1.00 | 52.34 | N0   |    |
| ANISOU 1988 N GLY A 127    | 7110    | 7870    | 4910   | 230  | 160   | 1800 | N0 |
| ATOM 1989 CA GLY A 127     | -35.354 | -26.915 | 44.611 | 1.00 | 54.12 | C0   |    |
| ANISOU 1989 CA GLY A 127   | 7390    | 8080    | 5090   | 430  | 130   | 1980 | C0 |
| ATOM 1990 C GLY A 127      | -34.024 | -26.660 | 43.915 | 1.00 | 53.83 | C0   |    |
| ANISOU 1990 C GLY A 127    | 7220    | 8110    | 5120   | 570  | 60    | 1960 | C0 |
| ATOM 1991 O GLY A 127      | -33.206 | -27.591 | 43.866 | 1.00 | 54.42 | O0   |    |
| ANISOU 1991 O GLY A 127    | 7340    | 8140    | 5200   | 760  | 50    | 2110 | O0 |
| ATOM 1992 H GLY A 127      | -36.403 | -25.235 | 44.986 | 1.00 | 52.51 | H0   |    |
| ANISOU 1992 H GLY A 127    | 7060    | 8040    | 4850   | 180  | 120   | 1760 | H0 |
| ATOM 1993 HA2 GLY A 127    | -35.203 | -26.964 | 45.589 | 1.00 | 55.22 | H0   |    |
| ANISOU 1993 HA2 GLY A 127  | 7530    | 8350    | 5100   | 460  | 90    | 2060 | H0 |
| ATOM 1994 HA3 GLY A 127    | -35.711 | -27.791 | 44.317 | 1.00 | 54.52 | H0   |    |
| ANISOU 1994 HA3 GLY A 127  | 7580    | 7950    | 5190   | 450  | 210   | 2060 | H0 |

|                            |         |         |        |      |       |      |
|----------------------------|---------|---------|--------|------|-------|------|
| ATOM 1995 N VAL A 128      | -33.799 | -25.443 | 43.414 | 1.00 | 53.32 | N0   |
| ANISOU 1995 N VAL A 128    | 6990    | 8150    | 5110   | 490  | 10    | 1790 |
| ATOM 1996 CA VAL A 128     | -32.597 | -25.077 | 42.606 | 1.00 | 53.39 | C0   |
| ANISOU 1996 CA VAL A 128   | 6860    | 8230    | 5200   | 590  | -40   | 1740 |
| ATOM 1997 C VAL A 128      | -31.333 | -25.203 | 43.470 | 1.00 | 55.80 | C0   |
| ANISOU 1997 C VAL A 128    | 7060    | 8770    | 5380   | 750  | -150  | 1840 |
| ATOM 1998 O VAL A 128      | -30.273 | -25.524 | 42.902 | 1.00 | 55.48 | O0   |
| ANISOU 1998 O VAL A 128    | 6950    | 8740    | 5390   | 900  | -170  | 1880 |
| ATOM 1999 CB VAL A 128     | -32.727 | -23.668 | 41.994 | 1.00 | 51.79 | C0   |
| ANISOU 1999 CB VAL A 128   | 6530    | 8080    | 5060   | 440  | -60   | 1530 |
| ATOM 2000 CG1 VAL A 128    | -32.805 | -22.574 | 43.051 | 1.00 | 52.27 | C0   |
| ANISOU 2000 CG1 VAL A 128  | 6490    | 8380    | 4990   | 330  | -120  | 1450 |
| ATOM 2001 CG2 VAL A 128    | -31.598 | -23.377 | 41.019 | 1.00 | 51.45 | C0   |
| ANISOU 2001 CG2 VAL A 128  | 6370    | 8070    | 5110   | 520  | -90   | 1470 |
| ATOM 2002 H VAL A 128      | -34.380 | -24.754 | 43.531 | 1.00 | 52.29 | H0   |
| ANISOU 2002 H VAL A 128    | 6840    | 8060    | 4970   | 370  | 20    | 1690 |
| ATOM 2003 HA VAL A 128     | -32.524 | -25.716 | 41.876 | 1.00 | 53.42 | H0   |
| ANISOU 2003 HA VAL A 128   | 6930    | 8070    | 5290   | 660  | 0     | 1770 |
| ATOM 2004 HB VAL A 128     | -33.572 | -23.649 | 41.483 | 1.00 | 50.78 | H0   |
| ANISOU 2004 HB VAL A 128   | 6480    | 7820    | 5000   | 360  | 10    | 1470 |
| ATOM 2005 HG11 VAL A 128   | -33.522 | -22.773 | 43.676 | 1.00 | 52.40 | H0   |
| ANISOU 2005 HG11 VAL A 128 | 6590    | 8380    | 4940   | 280  | -100  | 1480 |
| ATOM 2006 HG12 VAL A 128   | -32.981 | -21.720 | 42.620 | 1.00 | 51.01 | H0   |
| ANISOU 2006 HG12 VAL A 128 | 6280    | 8220    | 4880   | 230  | -110  | 1320 |
| ATOM 2007 HG13 VAL A 128   | -31.961 | -22.524 | 43.532 | 1.00 | 53.19 | H0   |
| ANISOU 2007 HG13 VAL A 128 | 6530    | 8650    | 5030   | 400  | -180  | 1490 |
| ATOM 2008 HG21 VAL A 128   | -30.792 | -23.148 | 41.514 | 1.00 | 52.35 | H0   |
| ANISOU 2008 HG21 VAL A 128 | 6380    | 8360    | 5150   | 580  | -150  | 1490 |
| ATOM 2009 HG22 VAL A 128   | -31.848 | -22.632 | 40.446 | 1.00 | 50.22 | H0   |
| ANISOU 2009 HG22 VAL A 128 | 6180    | 7890    | 5010   | 430  | -70   | 1350 |
| ATOM 2010 HG23 VAL A 128   | -31.430 | -24.164 | 40.472 | 1.00 | 51.74 | H0   |
| ANISOU 2010 HG23 VAL A 128 | 6470    | 7980    | 5210   | 620  | -50   | 1540 |
| ATOM 2011 N ASP A 129      | -31.438 | -24.972 | 44.785 | 1.00 | 57.77 | N0   |
| ANISOU 2011 N ASP A 129    | 7290    | 9210    | 5460   | 710  | -200  | 1890 |
| ATOM 2012 CA ASP A 129     | -30.291 | -24.996 | 45.737 | 1.00 | 61.08 | C0   |
| ANISOU 2012 CA ASP A 129   | 7580    | 9900    | 5730   | 840  | -320  | 1990 |
| ATOM 2013 C ASP A 129      | -30.174 | -26.376 | 46.405 | 1.00 | 63.02 | C0   |
| ANISOU 2013 C ASP A 129    | 7970    | 10090   | 5880   | 1030 | -310  | 2230 |
| ATOM 2014 O ASP A 129      | -29.576 | -26.444 | 47.492 | 1.00 | 64.55 | O0   |
| ANISOU 2014 O ASP A 129    | 8100    | 10520   | 5910   | 1120 | -400  | 2330 |
| ATOM 2015 CB ASP A 129     | -30.423 | -23.895 | 46.798 | 1.00 | 62.53 | C0   |
| ANISOU 2015 CB ASP A 129   | 7660    | 10340   | 5760   | 700  | -380  | 1890 |
| ATOM 2016 CG ASP A 129     | -30.284 | -22.469 | 46.281 | 1.00 | 62.12 | C0   |
| ANISOU 2016 CG ASP A 129   | 7450    | 10380   | 5770   | 530  | -400  | 1660 |
| ATOM 2017 OD1 ASP A 129    | -29.819 | -22.287 | 45.137 | 1.00 | 61.63 | O0   |
| ANISOU 2017 OD1 ASP A 129  | 7340    | 10230   | 5850   | 560  | -380  | 1580 |
| ATOM 2018 OD2 ASP A 129    | -30.634 | -21.542 | 47.041 | 1.00 | 64.38 | O0   |
| ANISOU 2018 OD2 ASP A 129  | 7690    | 10820   | 5950   | 380  | -430  | 1550 |
| ATOM 2019 H ASP A 129      | -32.232 | -24.774 | 45.184 | 1.00 | 57.47 | H0   |
| ANISOU 2019 H ASP A 129    | 7300    | 9150    | 5380   | 600  | -170  | 1860 |
| ATOM 2020 HA ASP A 129     | -29.464 | -24.830 | 45.226 | 1.00 | 61.07 | H0   |
| ANISOU 2020 HA ASP A 129   | 7470    | 9960    | 5770   | 910  | -350  | 1950 |
| ATOM 2021 HB2 ASP A 129    | -31.299 | -23.977 | 47.228 | 1.00 | 62.27 | H0   |
| ANISOU 2021 HB2 ASP A 129  | 7720    | 10250   | 5690   | 610  | -340  | 1900 |



|                            |         |         |        |      |       |      |    |
|----------------------------|---------|---------|--------|------|-------|------|----|
| ATOM 2022 HB3 ASP A 129    | -29.737 | -24.029 | 47.482 | 1.00 | 63.98 | H0   |    |
| ANISOU 2022 HB3 ASP A 129  | 7770    | 10710   | 5830   | 780  | -460  | 1960 | H0 |
| ATOM 2023 N THR A 130      | -30.705 | -27.434 | 45.777 | 1.00 | 62.99 | N0   |    |
| ANISOU 2023 N THR A 130    | 8160    | 9790    | 5990   | 1090 | -200  | 2320 | N0 |
| ATOM 2024 CA THR A 130     | -30.692 | -28.832 | 46.293 | 1.00 | 64.98 | C0   |    |
| ANISOU 2024 CA THR A 130   | 8600    | 9920    | 6170   | 1260 | -160  | 2550 | C0 |
| ATOM 2025 C THR A 130      | -30.003 | -29.752 | 45.277 | 1.00 | 65.74 | C0   |    |
| ANISOU 2025 C THR A 130    | 8750    | 9820    | 6410   | 1460 | -110  | 2630 | C0 |
| ATOM 2026 O THR A 130      | -29.701 | -29.284 | 44.157 | 1.00 | 63.48 | O0   |    |
| ANISOU 2026 O THR A 130    | 8360    | 9500    | 6260   | 1430 | -110  | 2490 | O0 |
| ATOM 2027 CB THR A 130     | -32.113 | -29.322 | 46.606 | 1.00 | 64.49 | C0   |    |
| ANISOU 2027 CB THR A 130   | 8760    | 9650    | 6100   | 1120 | -40   | 2590 | C0 |
| ATOM 2028 OG1 THR A 130    | -32.844 | -29.421 | 45.382 | 1.00 | 62.41 | O0   |    |
| ANISOU 2028 OG1 THR A 130  | 8570    | 9120    | 6020   | 1010 | 60    | 2470 | O0 |
| ATOM 2029 CG2 THR A 130    | -32.852 | -28.416 | 47.567 | 1.00 | 63.85 | C0   |    |
| ANISOU 2029 CG2 THR A 130  | 8620    | 9750    | 5890   | 920  | -70   | 2500 | C0 |
| ATOM 2030 H THR A 130      | -31.116 | -27.374 | 44.969 | 1.00 | 61.66 | H0   |    |
| ANISOU 2030 H THR A 130    | 8030    | 9460    | 5940   | 1020 | -140  | 2240 | H0 |
| ATOM 2031 HA THR A 130     | -30.169 | -28.845 | 47.128 | 1.00 | 66.43 | H0   |    |
| ANISOU 2031 HA THR A 130   | 8730    | 10290   | 6230   | 1350 | -240  | 2640 | H0 |
| ATOM 2032 HB THR A 130     | -32.046 | -30.221 | 47.008 | 1.00 | 66.06 | H0   |    |
| ANISOU 2032 HB THR A 130   | 9090    | 9770    | 6240   | 1230 | -20   | 2750 | H0 |
| ATOM 2033 HG21 THR A 130   | -32.308 | -28.272 | 48.362 | 1.00 | 65.07 | H0   |    |
| ANISOU 2033 HG21 THR A 130 | 8710    | 10100   | 5920   | 980  | -150  | 2560 | H0 |
| ATOM 2034 HG22 THR A 130   | -33.695 | -28.831 | 47.822 | 1.00 | 64.02 | H0   |    |
| ANISOU 2034 HG22 THR A 130 | 8790    | 9650    | 5890   | 840  | 0     | 2540 | H0 |
| ATOM 2035 HG23 THR A 130   | -33.029 | -27.560 | 47.137 | 1.00 | 62.32 | H0   |    |
| ANISOU 2035 HG23 THR A 130 | 8330    | 9590    | 5760   | 800  | -90   | 2340 | H0 |
| ATOM 2036 N GLU A 131      | -29.784 | -31.014 | 45.664 | 1.00 | 68.28 | N0   |    |
| ANISOU 2036 N GLU A 131    | 9240    | 10030   | 6680   | 1660 | -80   | 2850 | N0 |
| ATOM 2037 CA GLU A 131     | -29.118 | -32.070 | 44.850 | 1.00 | 69.68 | C0   |    |
| ANISOU 2037 CA GLU A 131   | 9500    | 10010   | 6960   | 1890 | -20   | 2950 | C0 |
| ATOM 2038 C GLU A 131      | -29.969 | -32.413 | 43.620 | 1.00 | 67.18 | C0   |    |
| ANISOU 2038 C GLU A 131    | 9340    | 9350    | 6830   | 1760 | 120   | 2850 | C0 |
| ATOM 2039 O GLU A 131      | -29.378 | -32.700 | 42.562 | 1.00 | 66.41 | O0   |    |
| ANISOU 2039 O GLU A 131    | 9220    | 9140    | 6870   | 1870 | 150   | 2820 | O0 |
| ATOM 2040 CB GLU A 131     | -28.886 | -33.327 | 45.692 | 1.00 | 73.20 | C0   |    |
| ANISOU 2040 CB GLU A 131   | 10140   | 10380   | 7300   | 2110 | 10    | 3220 | C0 |
| ATOM 2041 CG GLU A 131     | -27.845 | -33.149 | 46.785 | 1.00 | 76.27 | C0   |    |
| ANISOU 2041 CG GLU A 131   | 10360   | 11120   | 7500   | 2300 | -140  | 3340 | C0 |
| ATOM 2042 CD GLU A 131     | -26.406 | -33.385 | 46.350 | 1.00 | 78.11 | C0   |    |
| ANISOU 2042 CD GLU A 131   | 10440   | 11470   | 7760   | 2580 | -220  | 3400 | C0 |
| ATOM 2043 OE1 GLU A 131    | -26.022 | -32.885 | 45.272 | 1.00 | 76.94 | O0   |    |
| ANISOU 2043 OE1 GLU A 131  | 10150   | 11320   | 7760   | 2540 | -210  | 3230 | O0 |
| ATOM 2044 OE2 GLU A 131    | -25.674 | -34.074 | 47.091 | 1.00 | 80.94 | O0   |    |
| ANISOU 2044 OE2 GLU A 131  | 10820   | 11940   | 7990   | 2840 | -270  | 3610 | O0 |
| ATOM 2045 H GLU A 131      | -30.040 | -31.311 | 46.487 | 1.00 | 69.36 | H0   |    |
| ANISOU 2045 H GLU A 131    | 9450    | 10200   | 6700   | 1670 | -80   | 2950 | H0 |
| ATOM 2046 HA GLU A 131     | -28.248 | -31.724 | 44.545 | 1.00 | 69.61 | H0   |    |
| ANISOU 2046 HA GLU A 131   | 9330    | 10140   | 6980   | 1980 | -90   | 2910 | H0 |
| ATOM 2047 HB2 GLU A 131    | -29.736 | -33.591 | 46.102 | 1.00 | 73.34 | H0   |    |
| ANISOU 2047 HB2 GLU A 131  | 10300   | 10290   | 7270   | 2000 | 70    | 3250 | H0 |
| ATOM 2048 HB3 GLU A 131    | -28.601 | -34.053 | 45.098 | 1.00 | 73.95 | H0   |    |
| ANISOU 2048 HB3 GLU A 131  | 10320   | 10300   | 7480   | 2250 | 70    | 3280 | H0 |

|             |     |     |   |     |         |         |        |      |       |      |    |
|-------------|-----|-----|---|-----|---------|---------|--------|------|-------|------|----|
| ATOM 2049   | HG2 | GLU | A | 131 | -27.913 | -32.238 | 47.141 | 1.00 | 75.21 | H0   |    |
| ANISOU 2049 | HG2 | GLU | A | 131 | 10080   | 11190   | 7300   | 2160 | -220  | 3230 | H0 |
| ATOM 2050   | HG3 | GLU | A | 131 | -28.050 | -33.767 | 47.519 | 1.00 | 77.72 | H0   |    |
| ANISOU 2050 | HG3 | GLU | A | 131 | 10690   | 11270   | 7580   | 2370 | -120  | 3500 | H0 |
| ATOM 2051   | N   | SER | A | 132 | -31.298 | -32.417 | 43.762 | 1.00 | 65.68 | N0   |    |
| ANISOU 2051 | N   | SER | A | 132 | 9290    | 9020    | 6650   | 1540 | 210   | 2800 | N0 |
| ATOM 2052   | CA  | SER | A | 132 | -32.267 | -32.698 | 42.667 | 1.00 | 64.29 | C0   |    |
| ANISOU 2052 | CA  | SER | A | 132 | 9250    | 8550    | 6630   | 1380 | 340   | 2690 | C0 |
| ATOM 2053   | C   | SER | A | 132 | -32.289 | -31.529 | 41.670 | 1.00 | 60.81 | C0   |    |
| ANISOU 2053 | C   | SER | A | 132 | 8620    | 8190    | 6300   | 1240 | 300   | 2460 | C0 |
| ATOM 2054   | O   | SER | A | 132 | -32.485 | -31.781 | 40.466 | 1.00 | 59.72 | O0   |    |
| ANISOU 2054 | O   | SER | A | 132 | 8540    | 7850    | 6310   | 1210 | 380   | 2370 | O0 |
| ATOM 2055   | CB  | SER | A | 132 | -33.646 | -32.981 | 43.216 | 1.00 | 64.75 | C0   |    |
| ANISOU 2055 | CB  | SER | A | 132 | 9480    | 8490    | 6630   | 1180 | 430   | 2700 | C0 |
| ATOM 2056   | OG  | SER | A | 132 | -34.313 | -31.777 | 43.578 | 1.00 | 63.73 | O0   |    |
| ANISOU 2056 | OG  | SER | A | 132 | 9210    | 8550    | 6450   | 970  | 380   | 2550 | O0 |
| ATOM 2057   | H   | SER | A | 132 | -31.714 | -32.247 | 44.554 | 1.00 | 66.10 | H0   |    |
| ANISOU 2057 | H   | SER | A | 132 | 9360    | 9150    | 6600   | 1470 | 190   | 2830 | H0 |
| ATOM 2058   | HA  | SER | A | 132 | -31.952 | -33.508 | 42.184 | 1.00 | 65.08 | H0   |    |
| ANISOU 2058 | HA  | SER | A | 132 | 9460    | 8480    | 6790   | 1510 | 400   | 2760 | H0 |
| ATOM 2059   | HB2 | SER | A | 132 | -34.175 | -33.456 | 42.535 | 1.00 | 64.45 | H0   |    |
| ANISOU 2059 | HB2 | SER | A | 132 | 9560    | 8240    | 6680   | 1120 | 530   | 2670 | H0 |
| ATOM 2060   | HB3 | SER | A | 132 | -33.570 | -33.564 | 44.005 | 1.00 | 66.47 | H0   |    |
| ANISOU 2060 | HB3 | SER | A | 132 | 9800    | 8700    | 6750   | 1270 | 440   | 2850 | H0 |
| ATOM 2061   | N   | GLY | A | 133 | -32.102 | -30.299 | 42.158 | 1.00 | 59.23 | N0   |    |
| ANISOU 2061 | N   | GLY | A | 133 | 8220    | 8260    | 6030   | 1160 | 190   | 2360 | N0 |
| ATOM 2062   | CA  | GLY | A | 133 | -32.160 | -29.068 | 41.347 | 1.00 | 56.54 | C0   |    |
| ANISOU 2062 | CA  | GLY | A | 133 | 7710    | 8000    | 5770   | 1020 | 160   | 2150 | C0 |
| ATOM 2063   | C   | GLY | A | 133 | -33.590 | -28.699 | 40.982 | 1.00 | 54.36 | C0   |    |
| ANISOU 2063 | C   | GLY | A | 133 | 7510    | 7600    | 5550   | 780  | 230   | 2020 | C0 |
| ATOM 2064   | O   | GLY | A | 133 | -34.522 | -29.412 | 41.405 | 1.00 | 54.59 | O0   |    |
| ANISOU 2064 | O   | GLY | A | 133 | 7710    | 7490    | 5540   | 720  | 310   | 2090 | O0 |
| ATOM 2065   | H   | GLY | A | 133 | -31.931 | -30.149 | 43.040 | 1.00 | 60.10 | H0   |    |
| ANISOU 2065 | H   | GLY | A | 133 | 8290    | 8520    | 6020   | 1190 | 140   | 2420 | H0 |
| ATOM 2066   | HA2 | GLY | A | 133 | -31.747 | -28.325 | 41.855 | 1.00 | 56.48 | H0   |    |
| ANISOU 2066 | HA2 | GLY | A | 133 | 7560    | 8200    | 5690   | 1010 | 70    | 2110 | H0 |
| ATOM 2067   | HA3 | GLY | A | 133 | -31.636 | -29.205 | 40.520 | 1.00 | 56.30 | H0   |    |
| ANISOU 2067 | HA3 | GLY | A | 133 | 7650    | 7910    | 5830   | 1100 | 170   | 2120 | H0 |
| ATOM 2068   | N   | ALA | A | 134 | -33.759 | -27.615 | 40.225 | 1.00 | 52.02 | N0   |    |
| ANISOU 2068 | N   | ALA | A | 134 | 7090    | 7350    | 5330   | 660  | 220   | 1830 | N0 |
| ATOM 2069   | CA  | ALA | A | 134 | -35.046 | -27.188 | 39.629 | 1.00 | 50.79 | C0   |    |
| ANISOU 2069 | CA  | ALA | A | 134 | 6970    | 7090    | 5240   | 470  | 280   | 1690 | C0 |
| ATOM 2070   | C   | ALA | A | 134 | -35.197 | -27.814 | 38.240 | 1.00 | 50.39 | C0   |    |
| ANISOU 2070 | C   | ALA | A | 134 | 7010    | 6800    | 5330   | 480  | 360   | 1650 | C0 |
| ATOM 2071   | O   | ALA | A | 134 | -34.168 | -28.131 | 37.611 | 1.00 | 50.76 | O0   |    |
| ANISOU 2071 | O   | ALA | A | 134 | 7030    | 6820    | 5440   | 630  | 350   | 1680 | O0 |
| ATOM 2072   | CB  | ALA | A | 134 | -35.110 | -25.682 | 39.551 | 1.00 | 49.33 | C0   |    |
| ANISOU 2072 | CB  | ALA | A | 134 | 6620    | 7070    | 5050   | 350  | 220   | 1530 | C0 |
| ATOM 2073   | H   | ALA | A | 134 | -33.077 | -27.051 | 40.010 | 1.00 | 51.90 | H0   |    |
| ANISOU 2073 | H   | ALA | A | 134 | 6950    | 7440    | 5320   | 700  | 160   | 1780 | H0 |
| ATOM 2074   | HA  | ALA | A | 134 | -35.779 | -27.510 | 40.201 | 1.00 | 51.20 | H0   |    |
| ANISOU 2074 | HA  | ALA | A | 134 | 7110    | 7100    | 5240   | 400  | 320   | 1730 | H0 |
| ATOM 2075   | HB1 | ALA | A | 134 | -35.972 | -25.412 | 39.194 | 1.00 | 48.35 | H0   |    |
| ANISOU 2075 | HB1 | ALA | A | 134 | 6530    | 6880    | 4960   | 240  | 260   | 1450 | H0 |

|                            |         |         |        |      |       |      |    |
|----------------------------|---------|---------|--------|------|-------|------|----|
| ATOM 2076 HB2 ALA A 134    | -34.995 | -25.305 | 40.439 | 1.00 | 49.76 | H0   |    |
| ANISOU 2076 HB2 ALA A 134  | 6630    | 7270    | 5010   | 340  | 170   | 1550 | H0 |
| ATOM 2077 HB3 ALA A 134    | -34.403 | -25.357 | 38.968 | 1.00 | 48.93 | H0   |    |
| ANISOU 2077 HB3 ALA A 134  | 6490    | 7050    | 5050   | 410  | 190   | 1490 | H0 |
| ATOM 2078 N THR A 135      | -36.437 | -27.980 | 37.780 | 1.00 | 49.75 | N0   |    |
| ANISOU 2078 N THR A 135    | 7020    | 6580    | 5300   | 330  | 450   | 1580 | N0 |
| ATOM 2079 CA THR A 135     | -36.758 | -28.343 | 36.378 | 1.00 | 49.56 | C0   |    |
| ANISOU 2079 CA THR A 135   | 7060    | 6370    | 5400   | 290  | 520   | 1500 | C0 |
| ATOM 2080 C THR A 135      | -37.610 | -27.224 | 35.773 | 1.00 | 47.99 | C0   |    |
| ANISOU 2080 C THR A 135    | 6770    | 6230    | 5240   | 130  | 510   | 1320 | C0 |
| ATOM 2081 O THR A 135      | -38.828 | -27.222 | 35.994 | 1.00 | 48.21 | O0   |    |
| ANISOU 2081 O THR A 135    | 6840    | 6230    | 5240   | -10  | 550   | 1280 | O0 |
| ATOM 2082 CB THR A 135     | -37.391 | -29.733 | 36.284 | 1.00 | 50.70 | C0   |    |
| ANISOU 2082 CB THR A 135   | 7420    | 6280    | 5570   | 270  | 640   | 1580 | C0 |
| ATOM 2083 OG1 THR A 135    | -36.469 | -30.645 | 36.881 | 1.00 | 52.51 | O0   |    |
| ANISOU 2083 OG1 THR A 135  | 7730    | 6470    | 5760   | 450  | 640   | 1760 | O0 |
| ATOM 2084 CG2 THR A 135    | -37.673 | -30.150 | 34.857 | 1.00 | 50.19 | C0   |    |
| ANISOU 2084 CG2 THR A 135  | 7420    | 6030    | 5620   | 230  | 710   | 1490 | C0 |
| ATOM 2085 H THR A 135      | -37.181 | -27.883 | 38.297 | 1.00 | 49.83 | H0   |    |
| ANISOU 2085 H THR A 135    | 7060    | 6610    | 5260   | 230  | 460   | 1570 | H0 |
| ATOM 2086 HA THR A 135     | -35.909 | -28.372 | 35.883 | 1.00 | 49.53 | H0   |    |
| ANISOU 2086 HA THR A 135   | 7020    | 6360    | 5450   | 400  | 500   | 1510 | H0 |
| ATOM 2087 HB THR A 135     | -38.234 | -29.735 | 36.798 | 1.00 | 50.78 | H0   |    |
| ANISOU 2087 HB THR A 135   | 7470    | 6300    | 5530   | 160  | 660   | 1580 | H0 |
| ATOM 2088 HG21 THR A 135   | -38.437 | -29.651 | 34.516 | 1.00 | 49.16 | H0   |    |
| ANISOU 2088 HG21 THR A 135 | 7250    | 5930    | 5510   | 100  | 720   | 1380 | H0 |
| ATOM 2089 HG22 THR A 135   | -37.872 | -31.103 | 34.829 | 1.00 | 51.23 | H0   |    |
| ANISOU 2089 HG22 THR A 135 | 7690    | 6010    | 5760   | 230  | 790   | 1550 | H0 |
| ATOM 2090 HG23 THR A 135   | -36.893 | -29.965 | 34.304 | 1.00 | 49.89 | H0   |    |
| ANISOU 2090 HG23 THR A 135 | 7320    | 6000    | 5630   | 320  | 680   | 1470 | H0 |
| ATOM 2091 N CYS A 136      | -36.956 | -26.304 | 35.063 | 1.00 | 47.32 | N0   |    |
| ANISOU 2091 N CYS A 136    | 6560    | 6220    | 5200   | 160  | 460   | 1230 | N0 |
| ATOM 2092 CA CYS A 136     | -37.561 | -25.202 | 34.273 | 1.00 | 46.34 | C0   |    |
| ANISOU 2092 CA CYS A 136   | 6350    | 6130    | 5120   | 50   | 450   | 1070 | C0 |
| ATOM 2093 C CYS A 136      | -37.970 | -25.737 | 32.893 | 1.00 | 46.29 | C0   |    |
| ANISOU 2093 C CYS A 136    | 6420    | 5950    | 5220   | 20   | 520   | 1010 | C0 |
| ATOM 2094 O CYS A 136      | -37.069 | -26.116 | 32.121 | 1.00 | 47.35 | O0   |    |
| ANISOU 2094 O CYS A 136    | 6560    | 6010    | 5420   | 120  | 530   | 1020 | O0 |
| ATOM 2095 CB CYS A 136     | -36.558 | -24.060 | 34.139 | 1.00 | 46.00 | C0   |    |
| ANISOU 2095 CB CYS A 136   | 6160    | 6230    | 5090   | 100  | 370   | 1010 | C0 |
| ATOM 2096 SG CYS A 136     | -37.138 | -22.680 | 33.122 | 1.00 | 44.69 | S0   |    |
| ANISOU 2096 SG CYS A 136   | 5920    | 6090    | 4970   | 0    | 370   | 840  | S0 |
| ATOM 2097 H CYS A 136      | -36.046 | -26.291 | 35.013 | 1.00 | 47.69 | H0   |    |
| ANISOU 2097 H CYS A 136    | 6560    | 6300    | 5260   | 260  | 420   | 1260 | H0 |
| ATOM 2098 HA CYS A 136     | -38.360 | -24.876 | 34.747 | 1.00 | 46.10 | H0   |    |
| ANISOU 2098 HA CYS A 136   | 6320    | 6150    | 5050   | -40  | 450   | 1040 | H0 |
| ATOM 2099 HB2 CYS A 136    | -36.345 | -23.718 | 35.031 | 1.00 | 46.37 | H0   |    |
| ANISOU 2099 HB2 CYS A 136  | 6160    | 6400    | 5060   | 110  | 330   | 1040 | H0 |
| ATOM 2100 HB3 CYS A 136    | -35.731 | -24.407 | 33.746 | 1.00 | 46.40 | H0   |    |
| ANISOU 2100 HB3 CYS A 136  | 6200    | 6250    | 5170   | 190  | 370   | 1050 | H0 |
| ATOM 2101 N ARG A 137      | -39.272 | -25.766 | 32.593 | 1.00 | 45.97 | N0   |    |
| ANISOU 2101 N ARG A 137    | 6420    | 5860    | 5180   | -120 | 560   | 940  | N0 |
| ATOM 2102 CA ARG A 137     | -39.815 | -26.230 | 31.286 | 1.00 | 45.56 | C0   |    |
| ANISOU 2102 CA ARG A 137   | 6430    | 5670    | 5210   | -170 | 630   | 860  | C0 |

|                            |         |         |        |      |       |      |    |
|----------------------------|---------|---------|--------|------|-------|------|----|
| ATOM 2103 C ARG A 137      | -40.106 | -25.021 | 30.383 | 1.00 | 43.56 |      | C0 |
| ANISOU 2103 C ARG A 137    | 6080    | 5490    | 4980   | -220 | 590   | 720  | C0 |
| ATOM 2104 O ARG A 137      | -40.927 | -24.173 | 30.780 | 1.00 | 42.85 |      | O0 |
| ANISOU 2104 O ARG A 137    | 5920    | 5510    | 4850   | -300 | 560   | 660  | O0 |
| ATOM 2105 CB ARG A 137     | -41.054 | -27.101 | 31.511 | 1.00 | 46.58 |      | C0 |
| ANISOU 2105 CB ARG A 137   | 6670    | 5710    | 5310   | -300 | 700   | 860  | C0 |
| ATOM 2106 CG ARG A 137     | -40.761 | -28.348 | 32.331 | 1.00 | 49.15 |      | C0 |
| ANISOU 2106 CG ARG A 137   | 7140    | 5930    | 5610   | -250 | 760   | 1010 | C0 |
| ATOM 2107 CD ARG A 137     | -41.923 | -29.314 | 32.445 | 1.00 | 50.74 |      | C0 |
| ANISOU 2107 CD ARG A 137   | 7470    | 6020    | 5790   | -400 | 860   | 1010 | C0 |
| ATOM 2108 NE ARG A 137     | -41.808 | -30.114 | 33.661 | 1.00 | 53.25 |      | N0 |
| ANISOU 2108 NE ARG A 137   | 7900    | 6290    | 6040   | -370 | 900   | 1150 | N0 |
| ATOM 2109 CZ ARG A 137     | -41.085 | -31.228 | 33.799 | 1.00 | 54.79 |      | C0 |
| ANISOU 2109 CZ ARG A 137   | 8240    | 6320    | 6250   | -260 | 950   | 1280 | C0 |
| ATOM 2110 NH1 ARG A 137    | -41.065 | -31.852 | 34.967 | 1.00 | 55.78 |      | N0 |
| ANISOU 2110 NH1 ARG A 137  | 8470    | 6420    | 6300   | -230 | 980   | 1420 | N0 |
| ATOM 2111 NH2 ARG A 137    | -40.387 | -31.717 | 32.785 | 1.00 | 54.75 |      | N0 |
| ANISOU 2111 NH2 ARG A 137  | 8290    | 6180    | 6330   | -170 | 980   | 1270 | N0 |
| ATOM 2112 H ARG A 137      | -39.915 | -25.498 | 33.180 | 1.00 | 45.86 |      | H0 |
| ANISOU 2112 H ARG A 137    | 6400    | 5910    | 5120   | -180 | 560   | 920  | H0 |
| ATOM 2113 HA ARG A 137     | -39.128 | -26.782 | 30.852 | 1.00 | 45.93 |      | H0 |
| ANISOU 2113 HA ARG A 137   | 6520    | 5630    | 5300   | -90  | 650   | 900  | H0 |
| ATOM 2114 HB2 ARG A 137    | -41.735 | -26.568 | 31.972 | 1.00 | 46.40 |      | H0 |
| ANISOU 2114 HB2 ARG A 137  | 6600    | 5780    | 5240   | -370 | 690   | 830  | H0 |
| ATOM 2115 HB3 ARG A 137    | -41.415 | -27.369 | 30.640 | 1.00 | 46.59 |      | H0 |
| ANISOU 2115 HB3 ARG A 137  | 6710    | 5640    | 5360   | -350 | 740   | 800  | H0 |
| ATOM 2116 HG2 ARG A 137    | -40.002 | -28.821 | 31.928 | 1.00 | 49.46 |      | H0 |
| ANISOU 2116 HG2 ARG A 137  | 7220    | 5880    | 5690   | -160 | 770   | 1050 | H0 |
| ATOM 2117 HG3 ARG A 137    | -40.492 | -28.077 | 33.235 | 1.00 | 49.29 |      | H0 |
| ANISOU 2117 HG3 ARG A 137  | 7120    | 6040    | 5570   | -220 | 720   | 1070 | H0 |
| ATOM 2118 HD2 ARG A 137    | -42.764 | -28.810 | 32.466 | 1.00 | 50.27 |      | H0 |
| ANISOU 2118 HD2 ARG A 137  | 7350    | 6040    | 5710   | -510 | 850   | 930  | H0 |
| ATOM 2119 HD3 ARG A 137    | -41.940 | -29.903 | 31.661 | 1.00 | 51.10 |      | H0 |
| ANISOU 2119 HD3 ARG A 137  | 7590    | 5940    | 5890   | -410 | 910   | 980  | H0 |
| ATOM 2120 HE ARG A 137     | -42.246 | -29.837 | 34.363 | 1.00 | 53.06 |      | H0 |
| ANISOU 2120 HE ARG A 137   | 7850    | 6350    | 5960   | -430 | 880   | 1160 | H0 |
| ATOM 2121 HH11 ARG A 137   | -41.528 | -31.533 | 35.643 | 1.00 | 55.87 |      | H0 |
| ANISOU 2121 HH11 ARG A 137 | 8450    | 6530    | 6250   | -300 | 960   | 1430 | H0 |
| ATOM 2122 HH12 ARG A 137   | -40.593 | -32.588 | 35.064 | 1.00 | 57.00 |      | H0 |
| ANISOU 2122 HH12 ARG A 137 | 8730    | 6470    | 6460   | -150 | 1020  | 1520 | H0 |
| ATOM 2123 HH21 ARG A 137   | -40.389 | -31.310 | 32.006 | 1.00 | 53.89 |      | H0 |
| ANISOU 2123 HH21 ARG A 137 | 8120    | 6090    | 6270   | -180 | 960   | 1180 | H0 |
| ATOM 2124 HH22 ARG A 137   | -39.915 | -32.454 | 32.894 | 1.00 | 55.86 |      | H0 |
| ANISOU 2124 HH22 ARG A 137 | 8530    | 6210    | 6480   | -80  | 1020  | 1360 | H0 |
| ATOM 2125 N ILE A 138      | -39.446 | -24.958 | 29.219 | 1.00 | 41.84 |      | N0 |
| ANISOU 2125 N ILE A 138    | 5850    | 5210    | 4830   | -160 | 590   | 680  | N0 |
| ATOM 2126 CA ILE A 138     | -39.640 | -23.921 | 28.162 | 1.00 | 41.07 |      | C0 |
| ANISOU 2126 CA ILE A 138   | 5680    | 5160    | 4760   | -190 | 570   | 560  | C0 |
| ATOM 2127 C ILE A 138      | -40.330 | -24.578 | 26.956 | 1.00 | 40.99 |      | C0 |
| ANISOU 2127 C ILE A 138    | 5740    | 5040    | 4790   | -250 | 630   | 500  | C0 |
| ATOM 2128 O ILE A 138      | -39.810 | -25.601 | 26.463 | 1.00 | 40.98 |      | O0 |
| ANISOU 2128 O ILE A 138    | 5830    | 4900    | 4840   | -210 | 680   | 530  | O0 |
| ATOM 2129 CB ILE A 138     | -38.290 | -23.280 | 27.767 | 1.00 | 41.18 |      | C0 |
| ANISOU 2129 CB ILE A 138   | 5620    | 5210    | 4810   | -80  | 530   | 560  | C0 |

|                            |         |         |        |       |       |     |    |
|----------------------------|---------|---------|--------|-------|-------|-----|----|
| ATOM 2130 CG1 ILE A 138    | -37.586 | -22.636 | 28.964 | 1.00  | 41.54 | C0  |    |
| ANISOU 2130 CG1 ILE A 138  | 5590    | 5390    | 4810   | -40   | 470   | 610 | C0 |
| ATOM 2131 CG2 ILE A 138    | -38.469 | -22.285 | 26.634 | 1.00  | 39.81 | C0  |    |
| ANISOU 2131 CG2 ILE A 138  | 5410    | 5060    | 4660   | -110  | 520   | 460 | C0 |
| ATOM 2132 CD1 ILE A 138    | -36.119 | -22.360 | 28.730 | 1.00  | 41.89 | C0  |    |
| ANISOU 2132 CD1 ILE A 138  | 5560    | 5470    | 4880   | 60    | 450   | 630 | C0 |
| ATOM 2133 H ILE A 138      | -38.812 | -25.571 | 28.993 | 1.00  | 42.77 | H0  |    |
| ANISOU 2133 H ILE A 138    | 6010    | 5260    | 4980   | -90   | 610   | 730 | H0 |
| ATOM 2134 HA ILE A 138     | -40.220 | -23.224 | 28.513 | 1.00  | 40.62 | H0  |    |
| ANISOU 2134 HA ILE A 138   | 5580    | 5190    | 4670   | -240  | 540   | 530 | H0 |
| ATOM 2135 HB ILE A 138     | -37.705 | -24.005 | 27.436 | 1.00  | 41.59 | H0  |    |
| ANISOU 2135 HB ILE A 138   | 5720    | 5180    | 4900   | -20   | 560   | 600 | H0 |
| ATOM 2136 HG12 ILE A 138   | -38.035 | -21.790 | 29.177 | 1.00  | 40.98 | H0  |    |
| ANISOU 2136 HG12 ILE A 138 | 5470    | 5390    | 4710   | -90   | 450   | 560 | H0 |
| ATOM 2137 HG13 ILE A 138   | -37.674 | -23.228 | 29.741 | 1.00  | 42.21 | H0  |    |
| ANISOU 2137 HG13 ILE A 138 | 5710    | 5470    | 4860   | -30   | 480   | 680 | H0 |
| ATOM 2138 HG21 ILE A 138   | -38.656 | -22.761 | 25.806 | 1.00  | 39.98 | H0  |    |
| ANISOU 2138 HG21 ILE A 138 | 5470    | 5000    | 4710   | -120  | 560   | 430 | H0 |
| ATOM 2139 HG22 ILE A 138   | -37.656 | -21.761 | 26.525 | 1.00  | 39.73 | H0  |    |
| ANISOU 2139 HG22 ILE A 138 | 5350    | 5090    | 4660   | -60   | 500   | 450 | H0 |
| ATOM 2140 HG23 ILE A 138   | -39.211 | -21.688 | 26.838 | 1.00  | 39.51 | H0  |    |
| ANISOU 2140 HG23 ILE A 138 | 5340    | 5080    | 4590   | -170  | 510   | 420 | H0 |
| ATOM 2141 HD11 ILE A 138   | -35.695 | -23.152 | 28.355 | 1.00  | 42.35 | H0  |    |
| ANISOU 2141 HD11 ILE A 138 | 5670    | 5450    | 4970   | 120   | 480   | 670 | H0 |
| ATOM 2142 HD12 ILE A 138   | -35.692 | -22.135 | 29.574 | 1.00  | 42.17 | H0  |    |
| ANISOU 2142 HD12 ILE A 138 | 5550    | 5600    | 4870   | 90    | 410   | 670 | H0 |
| ATOM 2143 HD13 ILE A 138   | -36.021 | -21.617 | 28.110 | 1.00  | 41.17 | H0  |    |
| ANISOU 2143 HD13 ILE A 138 | 5440    | 5400    | 4800   | 40    | 440   | 560 | H0 |
| ATOM 2144 N LYS A 139      | -41.447 | -24.006 | 26.495 | 1.00  | 40.02 | N0  |    |
| ANISOU 2144 N LYS A 139    | 5580    | 4970    | 4650   | -340  | 620   | 400 | N0 |
| ATOM 2145 CA LYS A 139     | -42.219 | -24.496 | 25.323 | 1.00  | 40.56 | C0  |    |
| ANISOU 2145 CA LYS A 139   | 5700    | 4980    | 4740   | -420  | 670   | 320 | C0 |
| ATOM 2146 C LYS A 139      | -42.022 | -23.522 | 24.158 | 1.00  | 38.84 | C0  |    |
| ANISOU 2146 C LYS A 139    | 5420    | 4800    | 4540   | -380  | 630   | 240 | C0 |
| ATOM 2147 O LYS A 139      | -42.222 | -22.310 | 24.368 | 1.00  | 36.59 | O0  |    |
| ANISOU 2147 O LYS A 139    | 5050    | 4630    | 4220   | -370  | 580   | 220 | O0 |
| ATOM 2148 CB LYS A 139     | -43.704 | -24.641 | 25.666 | 1.00  | 42.19 | C0  |    |
| ANISOU 2148 CB LYS A 139   | 5890    | 5240    | 4890   | -550  | 680   | 280 | C0 |
| ATOM 2149 CG LYS A 139     | -44.067 | -25.898 | 26.444 | 1.00  | 44.82 | C0  |    |
| ANISOU 2149 CG LYS A 139   | 6330    | 5490    | 5210   | -630  | 750   | 340 | C0 |
| ATOM 2150 CD LYS A 139     | -45.561 | -26.107 | 26.592 | 1.00  | 46.56 | C0  |    |
| ANISOU 2150 CD LYS A 139   | 6530    | 5770    | 5390   | -780  | 780   | 270 | C0 |
| ATOM 2151 CE LYS A 139     | -45.893 | -27.372 | 27.354 | 1.00  | 49.36 | C0  |    |
| ANISOU 2151 CE LYS A 139   | 7000    | 6030    | 5720   | -870  | 860   | 330 | C0 |
| ATOM 2152 NZ LYS A 139     | -47.350 | -27.510 | 27.588 | 1.00  | 50.94 | N0  |    |
| ANISOU 2152 NZ LYS A 139   | 7170    | 6320    | 5870   | -1040 | 900   | 260 | N0 |
| ATOM 2153 H LYS A 139      | -41.807 | -23.263 | 26.880 | 1.00  | 39.80 | H0  |    |
| ANISOU 2153 H LYS A 139    | 5500    | 5030    | 4590   | -360  | 590   | 380 | H0 |
| ATOM 2154 HA LYS A 139     | -41.868 | -25.376 | 25.064 | 1.00  | 41.16 | H0  |    |
| ANISOU 2154 HA LYS A 139   | 5850    | 4940    | 4840   | -410  | 710   | 350 | H0 |
| ATOM 2155 HB2 LYS A 139    | -43.979 | -23.860 | 26.190 | 1.00  | 41.78 | H0  |    |
| ANISOU 2155 HB2 LYS A 139  | 5770    | 5290    | 4810   | -550  | 640   | 270 | H0 |
| ATOM 2156 HB3 LYS A 139    | -44.217 | -24.635 | 24.831 | 1.00  | 42.14 | H0  |    |
| ANISOU 2156 HB3 LYS A 139  | 5880    | 5240    | 4890   | -600  | 690   | 200 | H0 |

|                            |         |         |        |       |       |     |
|----------------------------|---------|---------|--------|-------|-------|-----|
| ATOM 2157 HG2 LYS A 139    | -43.680 | -26.675 | 25.987 | 1.00  | 45.28 | H0  |
| ANISOU 2157 HG2 LYS A 139  | 6470    | 5430    | 5310   | -610  | 790   | 350 |
| ATOM 2158 HG3 LYS A 139    | -43.663 | -25.843 | 27.337 | 1.00  | 44.88 | H0  |
| ANISOU 2158 HG3 LYS A 139  | 6330    | 5510    | 5210   | -580  | 730   | 410 |
| ATOM 2159 HD2 LYS A 139    | -45.948 | -25.339 | 27.063 | 1.00  | 46.15 | H0  |
| ANISOU 2159 HD2 LYS A 139  | 6400    | 5840    | 5300   | -780  | 740   | 250 |
| ATOM 2160 HD3 LYS A 139    | -45.969 | -26.155 | 25.701 | 1.00  | 46.57 | H0  |
| ANISOU 2160 HD3 LYS A 139  | 6520    | 5780    | 5390   | -830  | 790   | 190 |
| ATOM 2161 HE2 LYS A 139    | -45.578 | -28.147 | 26.852 | 1.00  | 49.80 | H0  |
| ANISOU 2161 HE2 LYS A 139  | 7150    | 5960    | 5810   | -880  | 910   | 340 |
| ATOM 2162 HE3 LYS A 139    | -45.434 | -27.363 | 28.215 | 1.00  | 49.36 | H0  |
| ANISOU 2162 HE3 LYS A 139  | 7020    | 6030    | 5710   | -820  | 850   | 410 |
| ATOM 2163 HZ1 LYS A 139    | -47.644 | -26.826 | 28.107 | 1.00  | 50.22 | H0  |
| ANISOU 2163 HZ1 LYS A 139  | 7000    | 6340    | 5750   | -1030 | 860   | 250 |
| ATOM 2164 HZ2 LYS A 139    | -47.521 | -28.296 | 28.007 | 1.00  | 51.54 | H0  |
| ANISOU 2164 HZ2 LYS A 139  | 7330    | 6320    | 5940   | -1110 | 960   | 290 |
| ATOM 2165 HZ3 LYS A 139    | -47.791 | -27.493 | 26.796 | 1.00  | 50.60 | H0  |
| ANISOU 2165 HZ3 LYS A 139  | 7100    | 6290    | 5830   | -1090 | 900   | 180 |
| ATOM 2166 N ILE A 140      | -41.644 | -24.047 | 22.987 | 1.00  | 38.46 | N0  |
| ANISOU 2166 N ILE A 140    | 5430    | 4660    | 4530   | -370  | 670   | 210 |
| ATOM 2167 CA ILE A 140     | -41.410 | -23.268 | 21.733 | 1.00  | 37.46 | C0  |
| ANISOU 2167 CA ILE A 140   | 5270    | 4560    | 4410   | -340  | 650   | 140 |
| ATOM 2168 C ILE A 140      | -42.352 | -23.797 | 20.650 | 1.00  | 36.66 | C0  |
| ANISOU 2168 C ILE A 140    | 5210    | 4430    | 4290   | -430  | 680   | 60  |
| ATOM 2169 O ILE A 140      | -42.400 | -25.029 | 20.457 | 1.00  | 36.60 | O0  |
| ANISOU 2169 O ILE A 140    | 5290    | 4310    | 4300   | -480  | 740   | 50  |
| ATOM 2170 CB ILE A 140     | -39.947 | -23.359 | 21.253 | 1.00  | 38.18 | C0  |
| ANISOU 2170 CB ILE A 140   | 5380    | 4570    | 4550   | -230  | 670   | 180 |
| ATOM 2171 CG1 ILE A 140    | -38.935 | -23.181 | 22.387 | 1.00  | 39.31 | C0  |
| ANISOU 2171 CG1 ILE A 140  | 5480    | 4740    | 4710   | -150  | 640   | 260 |
| ATOM 2172 CG2 ILE A 140    | -39.703 | -22.367 | 20.121 | 1.00  | 37.54 | C0  |
| ANISOU 2172 CG2 ILE A 140  | 5260    | 4540    | 4470   | -210  | 650   | 110 |
| ATOM 2173 CD1 ILE A 140    | -38.700 | -21.745 | 22.776 | 1.00  | 39.47 | C0  |
| ANISOU 2173 CD1 ILE A 140  | 5410    | 4890    | 4700   | -130  | 580   | 250 |
| ATOM 2174 H ILE A 140      | -41.503 | -24.940 | 22.880 | 1.00  | 39.15 | H0  |
| ANISOU 2174 H ILE A 140    | 5580    | 4650    | 4640   | -380  | 710   | 230 |
| ATOM 2175 HA ILE A 140     | -41.622 | -22.335 | 21.904 | 1.00  | 36.87 | H0  |
| ANISOU 2175 HA ILE A 140   | 5130    | 4570    | 4310   | -330  | 610   | 130 |
| ATOM 2176 HB ILE A 140     | -39.816 | -24.268 | 20.884 | 1.00  | 38.84 | H0  |
| ANISOU 2176 HB ILE A 140   | 5530    | 4570    | 4660   | -240  | 710   | 180 |
| ATOM 2177 HG12 ILE A 140   | -39.248 | -23.674 | 23.174 | 1.00  | 39.68 | H0  |
| ANISOU 2177 HG12 ILE A 140 | 5550    | 4780    | 4740   | -170  | 650   | 310 |
| ATOM 2178 HG13 ILE A 140   | -38.080 | -23.574 | 22.108 | 1.00  | 39.59 | H0  |
| ANISOU 2178 HG13 ILE A 140 | 5540    | 4720    | 4780   | -90   | 660   | 290 |
| ATOM 2179 HG21 ILE A 140   | -40.092 | -22.709 | 19.297 | 1.00  | 37.73 | H0  |
| ANISOU 2179 HG21 ILE A 140 | 5320    | 4530    | 4490   | -240  | 670   | 60  |
| ATOM 2180 HG22 ILE A 140   | -38.746 | -22.243 | 19.996 | 1.00  | 37.50 | H0  |
| ANISOU 2180 HG22 ILE A 140 | 5250    | 4510    | 4490   | -150  | 650   | 140 |
| ATOM 2181 HG23 ILE A 140   | -40.113 | -21.512 | 20.340 | 1.00  | 37.07 | H0  |
| ANISOU 2181 HG23 ILE A 140 | 5150    | 4550    | 4380   | -220  | 610   | 100 |
| ATOM 2182 HD11 ILE A 140   | -38.060 | -21.341 | 22.165 | 1.00  | 38.95 | H0  |
| ANISOU 2182 HD11 ILE A 140 | 5330    | 4820    | 4660   | -100  | 590   | 230 |
| ATOM 2183 HD12 ILE A 140   | -38.349 | -21.707 | 23.683 | 1.00  | 39.33 | H0  |
| ANISOU 2183 HD12 ILE A 140 | 5360    | 4900    | 4680   | -110  | 560   | 300 |

|                            |         |         |        |      |       |      |    |
|----------------------------|---------|---------|--------|------|-------|------|----|
| ATOM 2184 HD13 ILE A 140   | -39.539 | -21.257 | 22.734 | 1.00 | 38.83 | H0   |    |
| ANISOU 2184 HD13 ILE A 140 | 5310    | 4850    | 4590   | -180 | 570   | 210  | H0 |
| ATOM 2185 N GLY A 141      | -43.022 | -22.892 | 19.937 | 1.00 | 35.20 | N0   |    |
| ANISOU 2185 N GLY A 141    | 4960    | 4350    | 4060   | -440 | 640   | -10  | N0 |
| ATOM 2186 CA GLY A 141     | -43.909 | -23.239 | 18.814 | 1.00 | 35.23 | C0   |    |
| ANISOU 2186 CA GLY A 141   | 4980    | 4370    | 4030   | -520 | 650   | -110 | C0 |
| ATOM 2187 C GLY A 141      | -44.212 | -22.029 | 17.956 | 1.00 | 34.31 | C0   |    |
| ANISOU 2187 C GLY A 141    | 4800    | 4370    | 3870   | -480 | 600   | -150 | C0 |
| ATOM 2188 O GLY A 141      | -43.835 | -20.907 | 18.360 | 1.00 | 33.76 | O0   |    |
| ANISOU 2188 O GLY A 141    | 4690    | 4340    | 3800   | -400 | 560   | -120 | O0 |
| ATOM 2189 H GLY A 141      | -42.967 | -21.999 | 20.110 | 1.00 | 34.81 | H0   |    |
| ANISOU 2189 H GLY A 141    | 4860    | 4360    | 4000   | -400 | 600   | -10  | H0 |
| ATOM 2190 HA2 GLY A 141    | -43.474 | -23.934 | 18.260 | 1.00 | 35.64 | H0   |    |
| ANISOU 2190 HA2 GLY A 141  | 5100    | 4330    | 4110   | -530 | 700   | -120 | H0 |
| ATOM 2191 HA3 GLY A 141    | -44.753 | -23.611 | 19.171 | 1.00 | 35.69 | H0   |    |
| ANISOU 2191 HA3 GLY A 141  | 5030    | 4470    | 4070   | -600 | 660   | -130 | H0 |
| ATOM 2192 N SER A 142      | -44.869 | -22.255 | 16.817 | 1.00 | 33.59 | N0   |    |
| ANISOU 2192 N SER A 142    | 4710    | 4310    | 3730   | -530 | 600   | -230 | N0 |
| ATOM 2193 CA SER A 142     | -45.334 | -21.205 | 15.877 | 1.00 | 33.63 | C0   |    |
| ANISOU 2193 CA SER A 142   | 4670    | 4430    | 3680   | -490 | 550   | -280 | C0 |
| ATOM 2194 C SER A 142      | -46.398 | -20.350 | 16.565 | 1.00 | 33.59 | C0   |    |
| ANISOU 2194 C SER A 142    | 4570    | 4570    | 3620   | -480 | 500   | -280 | C0 |
| ATOM 2195 O SER A 142      | -47.265 | -20.927 | 17.236 | 1.00 | 34.70 | O0   |    |
| ANISOU 2195 O SER A 142    | 4670    | 4770    | 3750   | -570 | 500   | -300 | O0 |
| ATOM 2196 CB SER A 142     | -45.880 | -21.814 | 14.607 | 1.00 | 34.14 | C0   |    |
| ANISOU 2196 CB SER A 142   | 4750    | 4530    | 3690   | -560 | 560   | -370 | C0 |
| ATOM 2197 OG SER A 142     | -46.581 | -20.842 | 13.852 | 1.00 | 33.71 | O0   |    |
| ANISOU 2197 OG SER A 142   | 4640    | 4620    | 3550   | -510 | 500   | -400 | O0 |
| ATOM 2198 H SER A 142      | -45.081 | -23.093 | 16.530 | 1.00 | 34.52 | H0   |    |
| ANISOU 2198 H SER A 142    | 4870    | 4390    | 3850   | -600 | 640   | -270 | H0 |
| ATOM 2199 HA SER A 142     | -44.560 | -20.626 | 15.648 | 1.00 | 33.06 | H0   |    |
| ANISOU 2199 HA SER A 142   | 4610    | 4320    | 3620   | -410 | 550   | -250 | H0 |
| ATOM 2200 HB2 SER A 142    | -45.138 | -22.176 | 14.071 | 1.00 | 34.14 | H0   |    |
| ANISOU 2200 HB2 SER A 142  | 4820    | 4440    | 3720   | -550 | 600   | -370 | H0 |
| ATOM 2201 HB3 SER A 142    | -46.487 | -22.555 | 14.832 | 1.00 | 34.71 | H0   |    |
| ANISOU 2201 HB3 SER A 142  | 4830    | 4610    | 3750   | -650 | 580   | -400 | H0 |
| ATOM 2202 N TRP A 143      | -46.363 | -19.029 | 16.377 | 1.00 | 33.02 | N0   |    |
| ANISOU 2202 N TRP A 143    | 4460    | 4560    | 3520   | -370 | 450   | -260 | N0 |
| ATOM 2203 CA TRP A 143     | -47.391 | -18.128 | 16.956 | 1.00 | 32.90 | C0   |    |
| ANISOU 2203 CA TRP A 143   | 4360    | 4690    | 3460   | -340 | 410   | -270 | C0 |
| ATOM 2204 C TRP A 143      | -48.701 | -18.214 | 16.159 | 1.00 | 33.59 | C0   |    |
| ANISOU 2204 C TRP A 143    | 4380    | 4930    | 3460   | -370 | 370   | -350 | C0 |
| ATOM 2205 O TRP A 143      | -49.778 | -18.119 | 16.791 | 1.00 | 32.87 | O0   |    |
| ANISOU 2205 O TRP A 143    | 4190    | 4970    | 3330   | -400 | 350   | -370 | O0 |
| ATOM 2206 CB TRP A 143     | -46.892 | -16.686 | 17.062 | 1.00 | 32.52 | C0   |    |
| ANISOU 2206 CB TRP A 143   | 4320    | 4630    | 3410   | -210 | 390   | -230 | C0 |
| ATOM 2207 CG TRP A 143     | -47.800 | -15.867 | 17.922 | 1.00 | 33.27 | C0   |    |
| ANISOU 2207 CG TRP A 143   | 4340    | 4830    | 3470   | -170 | 360   | -230 | C0 |
| ATOM 2208 CD1 TRP A 143    | -48.576 | -14.814 | 17.536 | 1.00 | 33.91 | C0   |    |
| ANISOU 2208 CD1 TRP A 143  | 4380    | 5020    | 3490   | -70  | 320   | -240 | C0 |
| ATOM 2209 CD2 TRP A 143    | -48.100 | -16.103 | 19.310 | 1.00 | 32.94 | C0   |    |
| ANISOU 2209 CD2 TRP A 143  | 4250    | 4810    | 3450   | -220 | 370   | -220 | C0 |
| ATOM 2210 NE1 TRP A 143    | -49.312 | -14.359 | 18.596 | 1.00 | 34.50 | N0   |    |
| ANISOU 2210 NE1 TRP A 143  | 4390    | 5170    | 3550   | -60  | 320   | -250 | N0 |

|                            |                        |               |    |
|----------------------------|------------------------|---------------|----|
| ATOM 2211 CE2 TRP A 143    | -49.035 -15.123 19.702 | 1.00 33.90    | C0 |
| ANISOU 2211 CE2 TRP A 143  | 4310 5050 3520         | -150 340 -230 | C0 |
| ATOM 2212 CE3 TRP A 143    | -47.647 -17.019 20.265 | 1.00 33.38    | C0 |
| ANISOU 2212 CE3 TRP A 143  | 4330 4800 3550         | -300 400 -190 | C0 |
| ATOM 2213 CZ2 TRP A 143    | -49.526 -15.041 21.009 | 1.00 34.51    | C0 |
| ANISOU 2213 CZ2 TRP A 143  | 4330 5190 3600         | -180 350 -230 | C0 |
| ATOM 2214 CZ3 TRP A 143    | -48.133 -16.943 21.556 | 1.00 33.97    | C0 |
| ANISOU 2214 CZ3 TRP A 143  | 4360 4930 3620         | -330 400 -180 | C0 |
| ATOM 2215 CH2 TRP A 143    | -49.064 -15.966 21.920 | 1.00 34.15    | C0 |
| ANISOU 2215 CH2 TRP A 143  | 4300 5080 3590         | -280 380 -200 | C0 |
| ATOM 2216 H TRP A 143      | -45.720 -18.603 15.893 | 1.00 32.71    | H0 |
| ANISOU 2216 H TRP A 143    | 4460 4480 3490         | -320 460 -250 | H0 |
| ATOM 2217 HA TRP A 143     | -47.571 -18.443 17.872 | 1.00 32.95    | H0 |
| ANISOU 2217 HA TRP A 143   | 4340 4690 3480         | -380 420 -260 | H0 |
| ATOM 2218 HB2 TRP A 143    | -45.990 -16.689 17.442 | 1.00 32.17    | H0 |
| ANISOU 2218 HB2 TRP A 143  | 4310 4490 3410         | -200 410 -190 | H0 |
| ATOM 2219 HB3 TRP A 143    | -46.848 -16.298 16.164 | 1.00 32.73    | H0 |
| ANISOU 2219 HB3 TRP A 143  | 4370 4670 3400         | -160 380 -240 | H0 |
| ATOM 2220 HD1 TRP A 143    | -48.600 -14.443 16.667 | 1.00 34.16    | H0 |
| ANISOU 2220 HD1 TRP A 143  | 4430 5060 3490         | -20 310 -250  | H0 |
| ATOM 2221 HE1 TRP A 143    | -49.858 -13.679 18.573 | 1.00 34.64    | H0 |
| ANISOU 2221 HE1 TRP A 143  | 4370 5260 3530         | 10 300 -250   | H0 |
| ATOM 2222 HE3 TRP A 143    | -47.020 -17.683 20.028 | 1.00 33.32    | H0 |
| ANISOU 2222 HE3 TRP A 143  | 4370 4710 3580         | -330 420 -170 | H0 |
| ATOM 2223 HZ2 TRP A 143    | -50.153 -14.384 21.253 | 1.00 34.56    | H0 |
| ANISOU 2223 HZ2 TRP A 143  | 4290 5270 3570         | -130 340 -250 | H0 |
| ATOM 2224 HZ3 TRP A 143    | -47.834 -17.561 22.203 | 1.00 33.81    | H0 |
| ANISOU 2224 HZ3 TRP A 143  | 4350 4870 3620         | -380 420 -150 | H0 |
| ATOM 2225 HH2 TRP A 143    | -49.378 -15.935 22.807 | 1.00 34.25    | H0 |
| ANISOU 2225 HH2 TRP A 143  | 4280 5130 3600         | -300 390 -200 | H0 |
| ATOM 2226 N THR A 144      | -48.627 -18.404 14.836 | 1.00 33.97    | N0 |
| ANISOU 2226 N THR A 144    | 4460 4990 3470         | -370 370 -380 | N0 |
| ATOM 2227 CA THR A 144     | -49.778 -18.207 13.917 | 1.00 35.35    | C0 |
| ANISOU 2227 CA THR A 144   | 4560 5340 3540         | -370 320 -450 | C0 |
| ATOM 2228 C THR A 144      | -50.002 -19.391 12.969 | 1.00 36.46    | C0 |
| ANISOU 2228 C THR A 144    | 4720 5490 3640         | -500 340 -530 | C0 |
| ATOM 2229 O THR A 144      | -51.018 -19.340 12.249 | 1.00 38.68    | O0 |
| ANISOU 2229 O THR A 144    | 4920 5950 3830         | -520 290 -600 | O0 |
| ATOM 2230 CB THR A 144     | -49.612 -16.902 13.131 | 1.00 35.59    | C0 |
| ANISOU 2230 CB THR A 144   | 4600 5410 3510         | -210 280 -410 | C0 |
| ATOM 2231 OG1 THR A 144    | -48.546 -17.051 12.193 | 1.00 35.57    | O0 |
| ANISOU 2231 OG1 THR A 144  | 4710 5280 3530         | -200 310 -400 | O0 |
| ATOM 2232 CG2 THR A 144    | -49.340 -15.724 14.041 | 1.00 35.19    | C0 |
| ANISOU 2232 CG2 THR A 144  | 4560 5320 3500         | -100 270 -340 | C0 |
| ATOM 2233 H THR A 144      | -47.861 -18.631 14.401 | 1.00 33.86    | H0 |
| ANISOU 2233 H THR A 144    | 4510 4880 3480         | -370 390 -370 | H0 |
| ATOM 2234 HA THR A 144     | -50.581 -18.117 14.473 | 1.00 35.70    | H0 |
| ANISOU 2234 HA THR A 144   | 4520 5480 3560         | -380 300 -470 | H0 |
| ATOM 2235 HB THR A 144     | -50.449 -16.732 12.636 | 1.00 36.37    | H0 |
| ANISOU 2235 HB THR A 144   | 4640 5640 3540         | -190 240 -450 | H0 |
| ATOM 2236 HG21 THR A 144   | -49.898 -15.791 14.836 | 1.00 35.20    | H0 |
| ANISOU 2236 HG21 THR A 144 | 4490 5370 3510         | -120 270 -350 | H0 |
| ATOM 2237 HG22 THR A 144   | -49.545 -14.896 13.571 | 1.00 35.34    | H0 |
| ANISOU 2237 HG22 THR A 144 | 4580 5380 3470         | 0 250 -330    | H0 |



|        |      |      |     |   |     |         |         |        |       |       |       |    |
|--------|------|------|-----|---|-----|---------|---------|--------|-------|-------|-------|----|
| ATOM   | 2238 | HG23 | THR | A | 144 | -48.402 | -15.724 | 14.303 | 1.00  | 34.46 | H0    |    |
| ANISOU | 2238 | HG23 | THR | A | 144 | 4530    | 5100    | 3470   | -100  | 310   | -310  | H0 |
| ATOM   | 2239 | N    | HIS | A | 145 | -49.137 | -20.411 | 12.953 | 1.00  | 36.22 | N0    |    |
| ANISOU | 2239 | N    | HIS | A | 145 | 4780    | 5300    | 3680   | -580  | 400   | -530  | N0 |
| ATOM   | 2240 | CA   | HIS | A | 145 | -49.251 | -21.569 | 12.020 | 1.00  | 37.26 | C0    |    |
| ANISOU | 2240 | CA   | HIS | A | 145 | 4960    | 5410    | 3790   | -700  | 440   | -620  | C0 |
| ATOM   | 2241 | C    | HIS | A | 145 | -49.591 | -22.852 | 12.789 | 1.00  | 37.64 | C0    |    |
| ANISOU | 2241 | C    | HIS | A | 145 | 5030    | 5400    | 3880   | -870  | 500   | -660  | C0 |
| ATOM   | 2242 | O    | HIS | A | 145 | -48.772 | -23.297 | 13.610 | 1.00  | 36.58 | O0    |    |
| ANISOU | 2242 | O    | HIS | A | 145 | 4970    | 5090    | 3840   | -860  | 560   | -590  | O0 |
| ATOM   | 2243 | CB   | HIS | A | 145 | -47.981 | -21.739 | 11.179 | 1.00  | 36.74 | C0    |    |
| ANISOU | 2243 | CB   | HIS | A | 145 | 5010    | 5190    | 3760   | -660  | 480   | -600  | C0 |
| ATOM   | 2244 | CG   | HIS | A | 145 | -47.688 | -20.586 | 10.277 | 1.00  | 36.83 | C0    |    |
| ANISOU | 2244 | CG   | HIS | A | 145 | 5030    | 5260    | 3710   | -530  | 440   | -570  | C0 |
| ATOM   | 2245 | ND1  | HIS | A | 145 | -48.366 | -20.382 | 9.085  | 1.00  | 37.59 | N0    |    |
| ANISOU | 2245 | ND1  | HIS | A | 145 | 5090    | 5500    | 3690   | -530  | 390   | -640  | N0 |
| ATOM   | 2246 | CD2  | HIS | A | 145 | -46.774 | -19.596 | 10.364 | 1.00  | 35.54 | C0    |    |
| ANISOU | 2246 | CD2  | HIS | A | 145 | 4900    | 5020    | 3580   | -400  | 440   | -490  | C0 |
| ATOM   | 2247 | CE1  | HIS | A | 145 | -47.891 | -19.307 | 8.493  | 1.00  | 37.24 | C0    |    |
| ANISOU | 2247 | CE1  | HIS | A | 145 | 5080    | 5460    | 3610   | -400  | 370   | -580  | C0 |
| ATOM   | 2248 | NE2  | HIS | A | 145 | -46.912 | -18.809 | 9.254  | 1.00  | 36.03 | N0    |    |
| ANISOU | 2248 | NE2  | HIS | A | 145 | 4970    | 5160    | 3550   | -320  | 400   | -490  | N0 |
| ATOM   | 2249 | H    | HIS | A | 145 | -48.423 | -20.481 | 13.512 | 1.00  | 35.67 | H0    |    |
| ANISOU | 2249 | H    | HIS | A | 145 | 4760    | 5110    | 3680   | -560  | 430   | -480  | H0 |
| ATOM   | 2250 | HA   | HIS | A | 145 | -49.996 | -21.383 | 11.403 | 1.00  | 37.84 | H0    |    |
| ANISOU | 2250 | HA   | HIS | A | 145 | 4970    | 5620    | 3780   | -720  | 400   | -670  | H0 |
| ATOM   | 2251 | HB2  | HIS | A | 145 | -47.217 | -21.873 | 11.781 | 1.00  | 36.29 | H0    |    |
| ANISOU | 2251 | HB2  | HIS | A | 145 | 5000    | 5010    | 3780   | -630  | 520   | -550  | H0 |
| ATOM   | 2252 | HB3  | HIS | A | 145 | -48.072 | -22.551 | 10.633 | 1.00  | 37.56 | H0    |    |
| ANISOU | 2252 | HB3  | HIS | A | 145 | 5150    | 5270    | 3850   | -750  | 520   | -660  | H0 |
| ATOM   | 2253 | HD2  | HIS | A | 145 | -46.157 | -19.468 | 11.057 | 1.00  | 35.03 | H0    |    |
| ANISOU | 2253 | HD2  | HIS | A | 145 | 4860    | 4870    | 3590   | -370  | 460   | -440  | H0 |
| ATOM   | 2254 | HE1  | HIS | A | 145 | -48.188 | -18.953 | 7.674  | 1.00  | 37.76 | H0    |    |
| ANISOU | 2254 | HE1  | HIS | A | 145 | 5140    | 5610    | 3600   | -360  | 340   | -600  | H0 |
| ATOM   | 2255 | N    | HIS | A | 146 | -50.755 | -23.434 | 12.492 | 1.00  | 39.20 | N0    |    |
| ANISOU | 2255 | N    | HIS | A | 146 | 5160    | 5730    | 4000   | -1010 | 500   | -760  | N0 |
| ATOM   | 2256 | CA   | HIS | A | 146 | -51.212 | -24.752 | 13.005 | 1.00  | 40.70 | C0    |    |
| ANISOU | 2256 | CA   | HIS | A | 146 | 5380    | 5870    | 4210   | -1200 | 570   | -820  | C0 |
| ATOM   | 2257 | C    | HIS | A | 146 | -50.416 | -25.885 | 12.329 | 1.00  | 41.59 | C0    |    |
| ANISOU | 2257 | C    | HIS | A | 146 | 5650    | 5790    | 4370   | -1280 | 660   | -850  | C0 |
| ATOM   | 2258 | O    | HIS | A | 146 | -49.584 | -25.591 | 11.435 | 1.00  | 40.78 | O0    |    |
| ANISOU | 2258 | O    | HIS | A | 146 | 5600    | 5620    | 4270   | -1180 | 650   | -840  | O0 |
| ATOM   | 2259 | CB   | HIS | A | 146 | -52.737 | -24.873 | 12.850 | 1.00  | 42.30 | C0    |    |
| ANISOU | 2259 | CB   | HIS | A | 146 | 5440    | 6310    | 4310   | -1330 | 540   | -930  | C0 |
| ATOM   | 2260 | CG   | HIS | A | 146 | -53.231 | -24.824 | 11.439 | 1.00  | 43.05 | C0    |    |
| ANISOU | 2260 | CG   | HIS | A | 146 | 5490    | 6570    | 4300   | -1360 | 490   | -1030 | C0 |
| ATOM   | 2261 | ND1  | HIS | A | 146 | -53.023 | -25.851 | 10.546 | 1.00  | 43.82 | N0    |    |
| ANISOU | 2261 | ND1  | HIS | A | 146 | 5680    | 6590    | 4380   | -1500 | 550   | -1120 | N0 |
| ATOM   | 2262 | CD2  | HIS | A | 146 | -53.954 | -23.892 | 10.779 | 1.00  | 43.64 | C0    |    |
| ANISOU | 2262 | CD2  | HIS | A | 146 | 5430    | 6880    | 4270   | -1270 | 390   | -1060 | C0 |
| ATOM   | 2263 | CE1  | HIS | A | 146 | -53.584 | -25.546 | 9.392  | 1.00  | 44.91 | C0    |    |
| ANISOU | 2263 | CE1  | HIS | A | 146 | 5740    | 6920    | 4400   | -1500 | 490   | -1210 | C0 |
| ATOM   | 2264 | NE2  | HIS | A | 146 | -54.160 | -24.351 | 9.508  | 1.00  | 44.56 | N0    |    |
| ANISOU | 2264 | NE2  | HIS | A | 146 | 5560    | 7080    | 4300   | -1360 | 380   | -1160 | N0 |

|                           |         |         |        |       |           |    |
|---------------------------|---------|---------|--------|-------|-----------|----|
| ATOM 2265 H HIS A 146     | -51.368 | -23.047 | 11.941 | 1.00  | 39.70     | H0 |
| ANISOU 2265 H HIS A 146   | 5150    | 5940    | 3990   | -1000 | 450 -800  | H0 |
| ATOM 2266 HA HIS A 146    | -51.005 | -24.780 | 13.969 | 1.00  | 40.26     | H0 |
| ANISOU 2266 HA HIS A 146  | 5340    | 5740    | 4210   | -1180 | 590 -760  | H0 |
| ATOM 2267 HB2 HIS A 146   | -53.028 | -25.720 | 13.254 | 1.00  | 42.87     | H0 |
| ANISOU 2267 HB2 HIS A 146 | 5540    | 6340    | 4400   | -1470 | 590 -970  | H0 |
| ATOM 2268 HB3 HIS A 146   | -53.161 | -24.144 | 13.355 | 1.00  | 41.86     | H0 |
| ANISOU 2268 HB3 HIS A 146 | 5300    | 6370    | 4240   | -1260 | 490 -900  | H0 |
| ATOM 2269 HD2 HIS A 146   | -54.260 | -23.075 | 11.126 | 1.00  | 43.23     | H0 |
| ANISOU 2269 HD2 HIS A 146 | 5300    | 6930    | 4200   | -1170 | 340 -1010 | H0 |
| ATOM 2270 HE1 HIS A 146   | -53.573 | -26.080 | 8.617  | 1.00  | 45.65     | H0 |
| ANISOU 2270 HE1 HIS A 146 | 5880    | 7010    | 4450   | -1580 | 510 -1280 | H0 |
| ATOM 2271 N SER A 147     | -50.679 | -27.133 | 12.740 | 1.00  | 43.08     | N0 |
| ANISOU 2271 N SER A 147   | 5910    | 5880    | 4590   | -1440 | 750 -900  | N0 |
| ATOM 2272 CA SER A 147    | -49.839 | -28.341 | 12.504 | 1.00  | 44.08     | C0 |
| ANISOU 2272 CA SER A 147  | 6210    | 5750    | 4780   | -1510 | 860 -910  | C0 |
| ATOM 2273 C SER A 147     | -49.823 | -28.751 | 11.025 | 1.00  | 45.42     | C0 |
| ANISOU 2273 C SER A 147   | 6430    | 5940    | 4890   | -1570 | 880 -1030 | C0 |
| ATOM 2274 O SER A 147     | -48.874 | -29.462 | 10.617 | 1.00  | 45.75     | O0 |
| ANISOU 2274 O SER A 147   | 6620    | 5770    | 4990   | -1560 | 960 -1030 | O0 |
| ATOM 2275 CB SER A 147    | -50.307 | -29.484 | 13.368 | 1.00  | 45.39     | C0 |
| ANISOU 2275 CB SER A 147  | 6450    | 5820    | 4980   | -1670 | 950 -930  | C0 |
| ATOM 2276 OG SER A 147    | -51.647 | -29.835 | 13.057 | 1.00  | 46.85     | O0 |
| ANISOU 2276 OG SER A 147  | 6550    | 6180    | 5070   | -1870 | 950 -1060 | O0 |
| ATOM 2277 H SER A 147     | -51.427 | -27.335 | 13.219 | 1.00  | 43.60     | H0 |
| ANISOU 2277 H SER A 147   | 5920    | 6020    | 4630   | -1530 | 750 -930  | H0 |
| ATOM 2278 HA SER A 147    | -48.908 | -28.117 | 12.768 | 1.00  | 43.26     | H0 |
| ANISOU 2278 HA SER A 147  | 6160    | 5530    | 4740   | -1380 | 870 -820  | H0 |
| ATOM 2279 HB2 SER A 147   | -49.722 | -30.263 | 13.225 | 1.00  | 45.80     | H0 |
| ANISOU 2279 HB2 SER A 147 | 6630    | 5690    | 5070   | -1700 | 1030 -930 | H0 |
| ATOM 2280 HB3 SER A 147   | -50.246 | -29.225 | 14.314 | 1.00  | 44.78     | H0 |
| ANISOU 2280 HB3 SER A 147 | 6350    | 5730    | 4930   | -1620 | 940 -850  | H0 |
| ATOM 2281 N ARG A 148     | -50.827 | -28.345 | 10.246 | 1.00  | 46.14     | N0 |
| ANISOU 2281 N ARG A 148   | 6400    | 6270    | 4860   | -1640 | 810 -1130 | N0 |
| ATOM 2282 CA ARG A 148    | -50.881 | -28.641 | 8.789  | 1.00  | 47.72     | C0 |
| ANISOU 2282 CA ARG A 148  | 6630    | 6520    | 4980   | -1700 | 810 -1250 | C0 |
| ATOM 2283 C ARG A 148     | -50.049 | -27.612 | 8.007  | 1.00  | 45.99     | C0 |
| ANISOU 2283 C ARG A 148   | 6410    | 6320    | 4750   | -1500 | 750 -1180 | C0 |
| ATOM 2284 O ARG A 148     | -49.858 | -27.822 | 6.795  | 1.00  | 46.53     | O0 |
| ANISOU 2284 O ARG A 148   | 6520    | 6410    | 4750   | -1530 | 760 -1260 | O0 |
| ATOM 2285 CB ARG A 148    | -52.339 | -28.737 | 8.327  | 1.00  | 50.41     | C0 |
| ANISOU 2285 CB ARG A 148  | 6830    | 7130    | 5190   | -1870 | 760 -1390 | C0 |
| ATOM 2286 CG ARG A 148    | -52.910 | -30.140 | 8.467  | 1.00  | 53.59     | C0 |
| ANISOU 2286 CG ARG A 148  | 7310    | 7460    | 5590   | -2130 | 870 -1510 | C0 |
| ATOM 2287 CD ARG A 148    | -54.423 | -30.193 | 8.481  | 1.00  | 56.31     | C0 |
| ANISOU 2287 CD ARG A 148  | 7480    | 8090    | 5820   | -2310 | 830 -1630 | C0 |
| ATOM 2288 NE ARG A 148    | -54.954 | -29.710 | 9.747  | 1.00  | 57.08     | N0 |
| ANISOU 2288 NE ARG A 148  | 7470    | 8270    | 5950   | -2270 | 790 -1550 | N0 |
| ATOM 2289 CZ ARG A 148    | -56.179 | -29.952 | 10.210 | 1.00  | 58.76     | C0 |
| ANISOU 2289 CZ ARG A 148  | 7550    | 8670    | 6100   | -2450 | 790 -1640 | C0 |
| ATOM 2290 NH1 ARG A 148   | -57.032 | -30.689 | 9.516  | 1.00  | 61.24     | N0 |
| ANISOU 2290 NH1 ARG A 148 | 7820    | 9120    | 6320   | -2680 | 820 -1810 | N0 |
| ATOM 2291 NH2 ARG A 148   | -56.546 | -29.450 | 11.375 | 1.00  | 57.76     | N0 |
| ANISOU 2291 NH2 ARG A 148 | 7330    | 8600    | 6010   | -2390 | 770 -1550 | N0 |

|                            |         |         |        |       |       |       |    |
|----------------------------|---------|---------|--------|-------|-------|-------|----|
| ATOM 2292 H ARG A 148      | -51.539 | -27.877 | 10.560 | 1.00  | 46.26 | H0    |    |
| ANISOU 2292 H ARG A 148    | 6300    | 6440    | 4840   | -1640 | 750   | -1130 | H0 |
| ATOM 2293 HA ARG A 148     | -50.466 | -29.524 | 8.652  | 1.00  | 48.28 | H0    |    |
| ANISOU 2293 HA ARG A 148   | 6820    | 6430    | 5090   | -1780 | 900   | -1280 | H0 |
| ATOM 2294 HB2 ARG A 148    | -52.881 | -28.119 | 8.857  | 1.00  | 50.08 | H0    |    |
| ANISOU 2294 HB2 ARG A 148  | 6680    | 7230    | 5130   | -1830 | 700   | -1350 | H0 |
| ATOM 2295 HB3 ARG A 148    | -52.394 | -28.461 | 7.388  | 1.00  | 50.76 | H0    |    |
| ANISOU 2295 HB3 ARG A 148  | 6850    | 7280    | 5160   | -1850 | 720   | -1440 | H0 |
| ATOM 2296 HG2 ARG A 148    | -52.584 | -30.692 | 7.724  | 1.00  | 54.20 | H0    |    |
| ANISOU 2296 HG2 ARG A 148  | 7480    | 7460    | 5650   | -2190 | 930   | -1580 | H0 |
| ATOM 2297 HG3 ARG A 148    | -52.575 | -30.538 | 9.300  | 1.00  | 53.22 | H0    |    |
| ANISOU 2297 HG3 ARG A 148  | 7340    | 7260    | 5630   | -2140 | 940   | -1450 | H0 |
| ATOM 2298 HD2 ARG A 148    | -54.775 | -29.643 | 7.748  | 1.00  | 56.54 | H0    |    |
| ANISOU 2298 HD2 ARG A 148  | 7410    | 8310    | 5760   | -2270 | 750   | -1680 | H0 |
| ATOM 2299 HD3 ARG A 148    | -54.714 | -31.118 | 8.335  | 1.00  | 57.62 | H0    |    |
| ANISOU 2299 HD3 ARG A 148  | 7710    | 8210    | 5970   | -2500 | 910   | -1730 | H0 |
| ATOM 2300 HE ARG A 148     | -54.430 | -29.219 | 10.242 | 1.00  | 55.67 | H0    |    |
| ANISOU 2300 HE ARG A 148   | 7310    | 8010    | 5830   | -2130 | 780   | -1450 | H0 |
| ATOM 2301 HH11 ARG A 148   | -56.801 | -31.022 | 8.739  | 1.00  | 61.52 | H0    |    |
| ANISOU 2301 HH11 ARG A 148 | 7920    | 9120    | 6330   | -2720 | 840   | -1870 | H0 |
| ATOM 2302 HH12 ARG A 148   | -57.838 | -30.839 | 9.835  | 1.00  | 61.89 | H0    |    |
| ANISOU 2302 HH12 ARG A 148 | 7810    | 9340    | 6360   | -2800 | 820   | -1870 | H0 |
| ATOM 2303 HH21 ARG A 148   | -55.980 | -28.969 | 11.841 | 1.00  | 56.60 | H0    |    |
| ANISOU 2303 HH21 ARG A 148 | 7220    | 8370    | 5920   | -2240 | 750   | -1450 | H0 |
| ATOM 2304 HH22 ARG A 148   | -57.354 | -29.611 | 11.690 | 1.00  | 58.72 | H0    |    |
| ANISOU 2304 HH22 ARG A 148 | 7370    | 8850    | 6090   | -2500 | 770   | -1610 | H0 |
| ATOM 2305 N GLU A 149      | -49.528 | -26.571 | 8.670  | 1.00  | 43.85 | N0    |    |
| ANISOU 2305 N GLU A 149    | 6090    | 6040    | 4530   | -1320 | 700   | -1050 | N0 |
| ATOM 2306 CA GLU A 149     | -48.667 | -25.536 | 8.035  | 1.00  | 42.57 | C0    |    |
| ANISOU 2306 CA GLU A 149   | 5940    | 5870    | 4360   | -1130 | 650   | -980  | C0 |
| ATOM 2307 C GLU A 149      | -47.236 | -25.624 | 8.575  | 1.00  | 41.67 | C0    |    |
| ANISOU 2307 C GLU A 149    | 5940    | 5520    | 4380   | -1030 | 720   | -870  | C0 |
| ATOM 2308 O GLU A 149      | -46.307 | -25.498 | 7.762  | 1.00  | 40.96 | O0    |    |
| ANISOU 2308 O GLU A 149    | 5920    | 5350    | 4290   | -960  | 740   | -870  | O0 |
| ATOM 2309 CB GLU A 149     | -49.266 | -24.150 | 8.250  | 1.00  | 41.75 | C0    |    |
| ANISOU 2309 CB GLU A 149   | 5710    | 5960    | 4200   | -1010 | 540   | -920  | C0 |
| ATOM 2310 CG GLU A 149     | -50.435 | -23.862 | 7.332  | 1.00  | 43.04 | C0    |    |
| ANISOU 2310 CG GLU A 149   | 5760    | 6380    | 4210   | -1050 | 460   | -1010 | C0 |
| ATOM 2311 CD GLU A 149     | -51.130 | -22.541 | 7.598  | 1.00  | 42.92 | C0    |    |
| ANISOU 2311 CD GLU A 149   | 5620    | 6560    | 4130   | -920  | 360   | -950  | C0 |
| ATOM 2312 OE1 GLU A 149    | -50.551 | -21.700 | 8.309  | 1.00  | 41.54 | O0    |    |
| ANISOU 2312 OE1 GLU A 149  | 5450    | 6300    | 4030   | -780  | 350   | -840  | O0 |
| ATOM 2313 OE2 GLU A 149    | -52.256 | -22.357 | 7.097  | 1.00  | 44.47 | O0    |    |
| ANISOU 2313 OE2 GLU A 149  | 5690    | 7000    | 4210   | -950  | 290   | -1020 | O0 |
| ATOM 2314 H GLU A 149      | -49.692 | -26.417 | 9.550  | 1.00  | 43.51 | H0    |    |
| ANISOU 2314 H GLU A 149    | 6020    | 5990    | 4520   | -1300 | 690   | -1000 | H0 |
| ATOM 2315 HA GLU A 149     | -48.640 | -25.713 | 7.067  | 1.00  | 43.23 | H0    |    |
| ANISOU 2315 HA GLU A 149   | 6060    | 5980    | 4390   | -1160 | 660   | -1040 | H0 |
| ATOM 2316 HB2 GLU A 149    | -49.563 | -24.075 | 9.181  | 1.00  | 41.52 | H0    |    |
| ANISOU 2316 HB2 GLU A 149  | 5630    | 5940    | 4200   | -1020 | 530   | -890  | H0 |
| ATOM 2317 HB3 GLU A 149    | -48.568 | -23.478 | 8.099  | 1.00  | 41.05 | H0    |    |
| ANISOU 2317 HB3 GLU A 149  | 5640    | 5830    | 4130   | -890  | 530   | -850  | H0 |
| ATOM 2318 HG2 GLU A 149    | -50.119 | -23.865 | 6.404  | 1.00  | 43.36 | H0    |    |
| ANISOU 2318 HG2 GLU A 149  | 5850    | 6420    | 4200   | -1040 | 470   | -1040 | H0 |

|        |      |      |     |   |     |         |         |        |       |       |       |    |
|--------|------|------|-----|---|-----|---------|---------|--------|-------|-------|-------|----|
| ATOM   | 2319 | HG3  | GLU | A | 149 | -51.094 | -24.583 | 7.422  | 1.00  | 43.96 | H0    |    |
| ANISOU | 2319 | HG3  | GLU | A | 149 | 5850    | 6550    | 4300   | -1190 | 480   | -1090 | H0 |
| ATOM   | 2320 | N    | ILE | A | 150 | -47.070 | -25.781 | 9.893  | 1.00  | 41.88 | N0    |    |
| ANISOU | 2320 | N    | ILE | A | 150 | 5960    | 5460    | 4490   | -1010 | 740   | -800  | N0 |
| ATOM   | 2321 | CA   | ILE | A | 150 | -45.746 | -25.944 | 10.564 | 1.00  | 41.37 | C0    |    |
| ANISOU | 2321 | CA   | ILE | A | 150 | 5980    | 5190    | 4540   | -910  | 790   | -690  | C0 |
| ATOM   | 2322 | C    | ILE | A | 150 | -45.836 | -27.104 | 11.559 | 1.00  | 42.57 | C0    |    |
| ANISOU | 2322 | C    | ILE | A | 150 | 6200    | 5210    | 4760   | -1010 | 870   | -680  | C0 |
| ATOM   | 2323 | O    | ILE | A | 150 | -46.678 | -27.034 | 12.469 | 1.00  | 43.51 | O0    |    |
| ANISOU | 2323 | O    | ILE | A | 150 | 6250    | 5410    | 4870   | -1070 | 840   | -670  | O0 |
| ATOM   | 2324 | CB   | ILE | A | 150 | -45.307 | -24.639 | 11.256 | 1.00  | 40.32 | C0    |    |
| ANISOU | 2324 | CB   | ILE | A | 150 | 5780    | 5110    | 4440   | -760  | 720   | -580  | C0 |
| ATOM   | 2325 | CG1  | ILE | A | 150 | -45.055 | -23.525 | 10.237 | 1.00  | 40.04 | C0    |    |
| ANISOU | 2325 | CG1  | ILE | A | 150 | 5710    | 5160    | 4340   | -670  | 670   | -580  | C0 |
| ATOM   | 2326 | CG2  | ILE | A | 150 | -44.095 | -24.878 | 12.144 | 1.00  | 39.75 | C0    |    |
| ANISOU | 2326 | CG2  | ILE | A | 150 | 5760    | 4870    | 4470   | -680  | 770   | -490  | C0 |
| ATOM   | 2327 | CD1  | ILE | A | 150 | -44.521 | -22.245 | 10.831 | 1.00  | 39.22 | C0    |    |
| ANISOU | 2327 | CD1  | ILE | A | 150 | 5560    | 5070    | 4260   | -530  | 630   | -490  | C0 |
| ATOM   | 2328 | H    | ILE | A | 150 | -47.769 | -25.785 | 10.476 | 1.00  | 41.91 | H0    |    |
| ANISOU | 2328 | H    | ILE | A | 150 | 5910    | 5530    | 4480   | -1060 | 720   | -800  | H0 |
| ATOM   | 2329 | HA   | ILE | A | 150 | -45.083 | -26.169 | 9.888  | 1.00  | 41.62 | H0    |    |
| ANISOU | 2329 | HA   | ILE | A | 150 | 6080    | 5150    | 4590   | -890  | 830   | -710  | H0 |
| ATOM   | 2330 | HB   | ILE | A | 150 | -46.052 | -24.346 | 11.838 | 1.00  | 40.22 | H0    |    |
| ANISOU | 2330 | HB   | ILE | A | 150 | 5690    | 5190    | 4400   | -790  | 680   | -580  | H0 |
| ATOM   | 2331 | HG12 | ILE | A | 150 | -44.415 | -23.852 | 9.569  | 1.00  | 40.29 | H0    |    |
| ANISOU | 2331 | HG12 | ILE | A | 150 | 5810    | 5120    | 4380   | -660  | 720   | -600  | H0 |
| ATOM   | 2332 | HG13 | ILE | A | 150 | -45.897 | -23.328 | 9.775  | 1.00  | 40.54 | H0    |    |
| ANISOU | 2332 | HG13 | ILE | A | 150 | 5730    | 5350    | 4330   | -700  | 630   | -640  | H0 |
| ATOM   | 2333 | HG21 | ILE | A | 150 | -44.334 | -25.477 | 12.873 | 1.00  | 40.04 | H0    |    |
| ANISOU | 2333 | HG21 | ILE | A | 150 | 5810    | 4860    | 4540   | -730  | 800   | -470  | H0 |
| ATOM   | 2334 | HG22 | ILE | A | 150 | -43.787 | -24.033 | 12.515 | 1.00  | 38.98 | H0    |    |
| ANISOU | 2334 | HG22 | ILE | A | 150 | 5620    | 4810    | 4390   | -600  | 730   | -430  | H0 |
| ATOM   | 2335 | HG23 | ILE | A | 150 | -43.380 | -25.279 | 11.619 | 1.00  | 39.96 | H0    |    |
| ANISOU | 2335 | HG23 | ILE | A | 150 | 5850    | 4800    | 4530   | -660  | 820   | -500  | H0 |
| ATOM   | 2336 | HD11 | ILE | A | 150 | -44.924 | -22.097 | 11.704 | 1.00  | 38.87 | H0    |    |
| ANISOU | 2336 | HD11 | ILE | A | 150 | 5470    | 5060    | 4230   | -540  | 610   | -460  | H0 |
| ATOM   | 2337 | HD12 | ILE | A | 150 | -44.736 | -21.500 | 10.245 | 1.00  | 39.06 | H0    |    |
| ANISOU | 2337 | HD12 | ILE | A | 150 | 5520    | 5140    | 4180   | -480  | 590   | -490  | H0 |
| ATOM   | 2338 | HD13 | ILE | A | 150 | -43.555 | -22.310 | 10.929 | 1.00  | 38.77 | H0    |    |
| ANISOU | 2338 | HD13 | ILE | A | 150 | 5550    | 4910    | 4270   | -480  | 660   | -450  | H0 |
| ATOM   | 2339 | N    | SER | A | 151 | -44.989 | -28.120 | 11.393 | 1.00  | 42.96 | N0    |    |
| ANISOU | 2339 | N    | SER | A | 151 | 6380    | 5060    | 4880   | -1010 | 960   | -680  | N0 |
| ATOM   | 2340 | CA   | SER | A | 151 | -44.698 | -29.135 | 12.434 | 1.00  | 44.24 | C0    |    |
| ANISOU | 2340 | CA   | SER | A | 151 | 6640    | 5050    | 5120   | -1040 | 1040  | -620  | C0 |
| ATOM   | 2341 | C    | SER | A | 151 | -43.371 | -28.765 | 13.100 | 1.00  | 43.68 | C0    |    |
| ANISOU | 2341 | C    | SER | A | 151 | 6580    | 4880    | 5140   | -860  | 1040  | -490  | C0 |
| ATOM   | 2342 | O    | SER | A | 151 | -42.473 | -28.261 | 12.393 | 1.00  | 42.85 | O0    |    |
| ANISOU | 2342 | O    | SER | A | 151 | 6460    | 4770    | 5040   | -750  | 1030  | -480  | O0 |
| ATOM   | 2343 | CB   | SER | A | 151 | -44.680 | -30.533 | 11.867 | 1.00  | 45.88 | C0    |    |
| ANISOU | 2343 | CB   | SER | A | 151 | 6990    | 5090    | 5340   | -1150 | 1160  | -710  | C0 |
| ATOM   | 2344 | OG   | SER | A | 151 | -43.611 | -30.697 | 10.949 | 1.00  | 46.24 | O0    |    |
| ANISOU | 2344 | OG   | SER | A | 151 | 7110    | 5030    | 5420   | -1060 | 1210  | -720  | O0 |
| ATOM   | 2345 | H    | SER | A | 151 | -44.525 | -28.268 | 10.623 | 1.00  | 43.39 | H0    |    |
| ANISOU | 2345 | H    | SER | A | 151 | 6480    | 5070    | 4930   | -990  | 990   | -710  | H0 |

|                            |                        |                 |    |
|----------------------------|------------------------|-----------------|----|
| ATOM 2346 HA SER A 151     | -45.414 -29.085 13.121 | 1.00 44.22      | H0 |
| ANISOU 2346 HA SER A 151   | 6590 5110 5100         | -1100 1020 -610 | H0 |
| ATOM 2347 HB2 SER A 151    | -44.583 -31.182 12.599 | 1.00 46.38      | H0 |
| ANISOU 2347 HB2 SER A 151  | 7130 5040 5450         | -1170 1220 -660 | H0 |
| ATOM 2348 HB3 SER A 151    | -45.533 -30.711 11.411 | 1.00 46.62      | H0 |
| ANISOU 2348 HB3 SER A 151  | 7070 5270 5370         | -1280 1160 -800 | H0 |
| ATOM 2349 N VAL A 152      | -43.268 -28.949 14.415 | 1.00 43.85      | N0 |
| ANISOU 2349 N VAL A 152    | 6600 4860 5200         | -830 1040 -400  | N0 |
| ATOM 2350 CA VAL A 152     | -41.980 -28.797 15.150 | 1.00 44.91      | C0 |
| ANISOU 2350 CA VAL A 152   | 6750 4910 5410         | -660 1050 -270  | C0 |
| ATOM 2351 C VAL A 152      | -41.593 -30.170 15.698 | 1.00 47.53      | C0 |
| ANISOU 2351 C VAL A 152    | 7220 5040 5800         | -670 1150 -220  | C0 |
| ATOM 2352 O VAL A 152      | -42.502 -30.940 16.065 | 1.00 50.16      | O0 |
| ANISOU 2352 O VAL A 152    | 7620 5330 6110         | -800 1200 -250  | O0 |
| ATOM 2353 CB VAL A 152     | -42.038 -27.707 16.240 | 1.00 43.72      | C0 |
| ANISOU 2353 CB VAL A 152   | 6480 4880 5250         | -600 960 -190   | C0 |
| ATOM 2354 CG1 VAL A 152    | -42.252 -26.333 15.625 | 1.00 43.42      | C0 |
| ANISOU 2354 CG1 VAL A 152  | 6330 5010 5160         | -570 870 -230   | C0 |
| ATOM 2355 CG2 VAL A 152    | -43.090 -27.981 17.302 | 1.00 44.32      | C0 |
| ANISOU 2355 CG2 VAL A 152  | 6540 5000 5300         | -700 950 -170   | C0 |
| ATOM 2356 H VAL A 152      | -43.971 -29.189 14.941 | 1.00 44.48      | H0 |
| ANISOU 2356 H VAL A 152    | 6670 4960 5260         | -910 1050 -400  | H0 |
| ATOM 2357 HA VAL A 152     | -41.303 -28.533 14.508 | 1.00 44.58      | H0 |
| ANISOU 2357 HA VAL A 152   | 6700 4850 5380         | -590 1050 -280  | H0 |
| ATOM 2358 HB VAL A 152     | -41.157 -27.697 16.690 | 1.00 43.75      | H0 |
| ANISOU 2358 HB VAL A 152   | 6490 4840 5300         | -500 960 -110   | H0 |
| ATOM 2359 HG11 VAL A 152   | -41.529 -26.138 15.005 | 1.00 43.01      | H0 |
| ANISOU 2359 HG11 VAL A 152 | 6290 4930 5130         | -510 880 -230   | H0 |
| ATOM 2360 HG12 VAL A 152   | -42.265 -25.661 16.329 | 1.00 42.57      | H0 |
| ANISOU 2360 HG12 VAL A 152 | 6160 4970 5050         | -530 820 -180   | H0 |
| ATOM 2361 HG13 VAL A 152   | -43.100 -26.319 15.148 | 1.00 43.43      | H0 |
| ANISOU 2361 HG13 VAL A 152 | 6310 5080 5110         | -650 860 -300   | H0 |
| ATOM 2362 HG21 VAL A 152   | -43.973 -27.981 16.894 | 1.00 44.46      | H0 |
| ANISOU 2362 HG21 VAL A 152 | 6540 5090 5270         | -800 940 -250   | H0 |
| ATOM 2363 HG22 VAL A 152   | -43.049 -27.287 17.982 | 1.00 43.53      | H0 |
| ANISOU 2363 HG22 VAL A 152 | 6370 4980 5190         | -660 900 -120   | H0 |
| ATOM 2364 HG23 VAL A 152   | -42.923 -28.846 17.714 | 1.00 44.99      | H0 |
| ANISOU 2364 HG23 VAL A 152 | 6710 4970 5410         | -720 1010 -140  | H0 |
| ATOM 2365 N ASP A 153      | -40.295 -30.473 15.700 | 1.00 49.76      | N0 |
| ANISOU 2365 N ASP A 153    | 7550 5200 6150         | -520 1190 -160  | N0 |
| ATOM 2366 CA ASP A 153     | -39.721 -31.717 16.277 | 1.00 53.10      | C0 |
| ANISOU 2366 CA ASP A 153   | 8120 5420 6630         | -460 1290 -80   | C0 |
| ATOM 2367 C ASP A 153      | -38.368 -31.378 16.891 | 1.00 53.72      | C0 |
| ANISOU 2367 C ASP A 153    | 8140 5500 6760         | -260 1260 40    | C0 |
| ATOM 2368 O ASP A 153      | -37.630 -30.566 16.336 | 1.00 51.80      | O0 |
| ANISOU 2368 O ASP A 153    | 7810 5340 6530         | -170 1220 30    | O0 |
| ATOM 2369 CB ASP A 153     | -39.567 -32.812 15.218 | 1.00 55.45      | C0 |
| ANISOU 2369 CB ASP A 153   | 8560 5550 6960         | -500 1410 -170  | C0 |
| ATOM 2370 CG ASP A 153     | -40.883 -33.330 14.662 | 1.00 56.96      | C0 |
| ANISOU 2370 CG ASP A 153   | 8820 5730 7090         | -730 1450 -300  | C0 |
| ATOM 2371 OD1 ASP A 153    | -41.482 -34.216 15.306 | 1.00 59.29      | O0 |
| ANISOU 2371 OD1 ASP A 153  | 9220 5920 7390         | -830 1520 -290  | O0 |
| ATOM 2372 OD2 ASP A 153    | -41.297 -32.844 13.587 | 1.00 56.83      | O0 |
| ANISOU 2372 OD2 ASP A 153  | 8740 5830 7020         | -800 1420 -410  | O0 |

|                           |         |         |        |      |       |      |    |
|---------------------------|---------|---------|--------|------|-------|------|----|
| ATOM 2373 H ASP A 153     | -39.668 | -29.922 | 15.334 | 1.00 | 49.14 | H0   |    |
| ANISOU 2373 H ASP A 153   | 7420    | 5160    | 6080   | -440 | 1160  | -150 | H0 |
| ATOM 2374 HA ASP A 153    | -40.324 | -32.041 | 16.984 | 1.00 | 53.44 | H0   |    |
| ANISOU 2374 HA ASP A 153  | 8190    | 5450    | 6660   | -530 | 1300  | -50  | H0 |
| ATOM 2375 HB2 ASP A 153   | -39.036 | -32.462 | 14.474 | 1.00 | 55.03 | H0   |    |
| ANISOU 2375 HB2 ASP A 153 | 8480    | 5520    | 6910   | -450 | 1400  | -200 | H0 |
| ATOM 2376 HB3 ASP A 153   | -39.083 | -33.567 | 15.610 | 1.00 | 56.28 | H0   |    |
| ANISOU 2376 HB3 ASP A 153 | 8760    | 5510    | 7110   | -440 | 1470  | -110 | H0 |
| ATOM 2377 N PRO A 154     | -37.996 | -31.982 | 18.041 | 1.00 | 56.40 | N0   |    |
| ANISOU 2377 N PRO A 154   | 8540    | 5760    | 7130   | -180 | 1280  | 160  | N0 |
| ATOM 2378 CA PRO A 154    | -36.654 | -31.806 | 18.591 | 1.00 | 58.87 | C0   |    |
| ANISOU 2378 CA PRO A 154  | 8800    | 6080    | 7490   | 20   | 1260  | 280  | C0 |
| ATOM 2379 C PRO A 154     | -35.596 | -32.388 | 17.638 | 1.00 | 63.33 | C0   |    |
| ANISOU 2379 C PRO A 154   | 9420    | 6530    | 8110   | 140  | 1340  | 250  | C0 |
| ATOM 2380 O PRO A 154     | -35.860 | -33.407 | 17.022 | 1.00 | 64.21 | O0   |    |
| ANISOU 2380 O PRO A 154   | 9690    | 6470    | 8240   | 90   | 1450  | 200  | O0 |
| ATOM 2381 CB PRO A 154    | -36.692 | -32.562 | 19.928 | 1.00 | 59.35 | C0   |    |
| ANISOU 2381 CB PRO A 154  | 8940    | 6060    | 7550   | 70   | 1280  | 400  | C0 |
| ATOM 2382 CG PRO A 154    | -37.817 | -33.562 | 19.762 | 1.00 | 59.70 | C0   |    |
| ANISOU 2382 CG PRO A 154  | 9140    | 5960    | 7580   | -100 | 1380  | 350  | C0 |
| ATOM 2383 CD PRO A 154    | -38.826 | -32.879 | 18.860 | 1.00 | 58.19 | C0   |    |
| ANISOU 2383 CD PRO A 154  | 8880    | 5890    | 7340   | -280 | 1340  | 200  | C0 |
| ATOM 2384 HA PRO A 154    | -36.484 | -30.846 | 18.755 | 1.00 | 57.87 | H0   |    |
| ANISOU 2384 HA PRO A 154  | 8550    | 6100    | 7340   | 40   | 1180  | 280  | H0 |
| ATOM 2385 HB2 PRO A 154   | -35.841 | -33.020 | 20.099 | 1.00 | 60.09 | H0   |    |
| ANISOU 2385 HB2 PRO A 154 | 9070    | 6090    | 7680   | 200  | 1310  | 470  | H0 |
| ATOM 2386 HB3 PRO A 154   | -36.877 | -31.950 | 20.671 | 1.00 | 58.61 | H0   |    |
| ANISOU 2386 HB3 PRO A 154 | 8760    | 6090    | 7420   | 60   | 1210  | 450  | H0 |
| ATOM 2387 HG2 PRO A 154   | -37.489 | -34.388 | 19.351 | 1.00 | 60.83 | H0   |    |
| ANISOU 2387 HG2 PRO A 154 | 9400    | 5950    | 7760   | -70  | 1460  | 340  | H0 |
| ATOM 2388 HG3 PRO A 154   | -38.219 | -33.779 | 20.628 | 1.00 | 60.07 | H0   |    |
| ANISOU 2388 HG3 PRO A 154 | 9220    | 6000    | 7600   | -140 | 1370  | 410  | H0 |
| ATOM 2389 HD2 PRO A 154   | -39.294 | -33.530 | 18.305 | 1.00 | 58.88 | H0   |    |
| ANISOU 2389 HD2 PRO A 154 | 9060    | 5880    | 7430   | -380 | 1410  | 130  | H0 |
| ATOM 2390 HD3 PRO A 154   | -39.479 | -32.375 | 19.379 | 1.00 | 57.50 | H0   |    |
| ANISOU 2390 HD3 PRO A 154 | 8730    | 5910    | 7220   | -350 | 1280  | 200  | H0 |
| ATOM 2391 N THR A 155     | -34.446 | -31.716 | 17.524 | 1.00 | 67.13 | N0   |    |
| ANISOU 2391 N THR A 155   | 9780    | 7110    | 8620   | 280  | 1300  | 280  | N0 |
| ATOM 2392 CA THR A 155    | -33.260 | -32.182 | 16.756 | 1.00 | 71.37 | C0   |    |
| ANISOU 2392 CA THR A 155  | 10350   | 7560    | 9210   | 430  | 1370  | 280  | C0 |
| ATOM 2393 C THR A 155     | -32.865 | -33.575 | 17.263 | 1.00 | 77.08 | C0   |    |
| ANISOU 2393 C THR A 155   | 11220   | 8090    | 9980   | 550  | 1470  | 360  | C0 |
| ATOM 2394 O THR A 155     | -33.031 | -33.842 | 18.475 | 1.00 | 77.40 | O0   |    |
| ANISOU 2394 O THR A 155   | 11290   | 8120    | 10000  | 580  | 1440  | 480  | O0 |
| ATOM 2395 CB THR A 155    | -32.118 | -31.162 | 16.838 | 1.00 | 71.29 | C0   |    |
| ANISOU 2395 CB THR A 155  | 10160   | 7720    | 9210   | 550  | 1300  | 310  | C0 |
| ATOM 2396 OG1 THR A 155   | -32.637 | -29.905 | 16.400 | 1.00 | 69.19 | O0   |    |
| ANISOU 2396 OG1 THR A 155 | 9790    | 7610    | 8890   | 430  | 1220  | 230  | O0 |
| ATOM 2397 CG2 THR A 155   | -30.914 | -31.538 | 16.001 | 1.00 | 72.40 | C0   |    |
| ANISOU 2397 CG2 THR A 155 | 10300   | 7810    | 9400   | 690  | 1370  | 290  | C0 |
| ATOM 2398 H THR A 155     | -34.307 | -30.907 | 17.917 | 1.00 | 65.91 | H0   |    |
| ANISOU 2398 H THR A 155   | 9520    | 7080    | 8440   | 300  | 1220  | 310  | H0 |
| ATOM 2399 HA THR A 155    | -33.531 | -32.265 | 15.812 | 1.00 | 71.51 | H0   |    |
| ANISOU 2399 HA THR A 155  | 10410   | 7540    | 9220   | 360  | 1410  | 180  | H0 |

|                            |         |         |        |      |        |      |    |
|----------------------------|---------|---------|--------|------|--------|------|----|
| ATOM 2400 HB THR A 155     | -31.838 | -31.083 | 17.781 | 1.00 | 71.15  |      | H0 |
| ANISOU 2400 HB THR A 155   | 10090   | 7750    | 9190   | 620  | 1250   | 400  | H0 |
| ATOM 2401 HG21 THR A 155   | -30.451 | -32.289 | 16.414 | 1.00 | 73.46  |      | H0 |
| ANISOU 2401 HG21 THR A 155 | 10480   | 7860    | 9570   | 810  | 1410   | 360  | H0 |
| ATOM 2402 HG22 THR A 155   | -30.309 | -30.778 | 15.941 | 1.00 | 71.76  |      | H0 |
| ANISOU 2402 HG22 THR A 155 | 10090   | 7860    | 9320   | 730  | 1330   | 290  | H0 |
| ATOM 2403 HG23 THR A 155   | -31.206 | -31.791 | 15.107 | 1.00 | 72.46  |      | H0 |
| ANISOU 2403 HG23 THR A 155 | 10380   | 7750    | 9410   | 630  | 1430   | 200  | H0 |
| ATOM 2404 N THR A 156      | -32.345 | -34.412 | 16.361 | 1.00 | 83.45  |      | N0 |
| ANISOU 2404 N THR A 156    | 12140   | 8740    | 10830  | 610  | 1580   | 320  | N0 |
| ATOM 2405 CA THR A 156     | -32.228 | -35.889 | 16.504 | 1.00 | 88.81  |      | C0 |
| ANISOU 2405 CA THR A 156   | 13020   | 9160    | 11550  | 690  | 1710   | 360  | C0 |
| ATOM 2406 C THR A 156      | -31.259 | -36.286 | 17.627 | 1.00 | 92.96  |      | C0 |
| ANISOU 2406 C THR A 156    | 13540   | 9680    | 12110  | 930  | 1700   | 530  | C0 |
| ATOM 2407 O THR A 156      | -31.290 | -37.475 | 18.011 | 1.00 | 94.48  |      | O0 |
| ANISOU 2407 O THR A 156    | 13920   | 9650    | 12330  | 990  | 1810   | 610  | O0 |
| ATOM 2408 CB THR A 156     | -31.793 | -36.526 | 15.177 | 1.00 | 90.86  |      | C0 |
| ANISOU 2408 CB THR A 156   | 13380   | 9280    | 11860  | 720  | 1840   | 250  | C0 |
| ATOM 2409 OG1 THR A 156    | -30.585 | -35.886 | 14.762 | 1.00 | 91.30  |      | O0 |
| ANISOU 2409 OG1 THR A 156  | 13280   | 9470    | 11940  | 880  | 1800   | 260  | O0 |
| ATOM 2410 CG2 THR A 156    | -32.842 | -36.402 | 14.093 | 1.00 | 90.33  |      | C0 |
| ANISOU 2410 CG2 THR A 156  | 13370   | 9210    | 11750  | 480  | 1860   | 80   | C0 |
| ATOM 2411 H THR A 156      | -32.009 | -34.118 | 15.567 | 1.00 | 82.64  |      | H0 |
| ANISOU 2411 H THR A 156    | 11990   | 8670    | 10740  | 620  | 1590   | 250  | H0 |
| ATOM 2412 HA THR A 156     | -33.121 | -36.237 | 16.733 | 1.00 | 89.09  |      | H0 |
| ANISOU 2412 HA THR A 156   | 13150   | 9130    | 11570  | 560  | 1730   | 350  | H0 |
| ATOM 2413 HB THR A 156     | -31.611 | -37.482 | 15.337 | 1.00 | 92.33  |      | H0 |
| ANISOU 2413 HB THR A 156   | 13710   | 9300    | 12080  | 790  | 1930   | 290  | H0 |
| ATOM 2414 HG21 THR A 156   | -33.662 | -36.842 | 14.381 | 1.00 | 90.66  |      | H0 |
| ANISOU 2414 HG21 THR A 156 | 13510   | 9170    | 11770  | 370  | 1890   | 80   | H0 |
| ATOM 2415 HG22 THR A 156   | -32.518 | -36.824 | 13.277 | 1.00 | 91.04  |      | H0 |
| ANISOU 2415 HG22 THR A 156 | 13530   | 9210    | 11860  | 510  | 1940   | 20   | H0 |
| ATOM 2416 HG23 THR A 156   | -33.023 | -35.461 | 13.920 | 1.00 | 88.89  |      | H0 |
| ANISOU 2416 HG23 THR A 156 | 13060   | 9190    | 11530  | 420  | 1770   | 50   | H0 |
| ATOM 2417 N GLU A 157      | -30.426 | -35.361 | 18.127 | 1.00 | 94.93  |      | N0 |
| ANISOU 2417 N GLU A 157    | 13580   | 10140   | 12350  | 1040 | 1590   | 600  | N0 |
| ATOM 2418 CA GLU A 157     | -29.378 | -35.676 | 19.138 | 1.00 | 98.06  |      | C0 |
| ANISOU 2418 CA GLU A 157   | 13930   | 10570   | 12760  | 1280 | 1570   | 760  | C0 |
| ATOM 2419 C GLU A 157      | -29.003 | -34.433 | 19.959 | 1.00 | 98.53  |      | C0 |
| ANISOU 2419 C GLU A 157    | 13760   | 10910   | 12770  | 1300 | 1420   | 810  | C0 |
| ATOM 2420 O GLU A 157      | -28.593 | -33.418 | 19.354 | 1.00 | 97.16  |      | O0 |
| ANISOU 2420 O GLU A 157    | 13420   | 10900   | 12600  | 1270 | 1370   | 730  | O0 |
| ATOM 2421 CB GLU A 157     | -28.143 | -36.251 | 18.438 | 1.00 | 99.58  |      | C0 |
| ANISOU 2421 CB GLU A 157   | 14130   | 10690   | 13020  | 1500 | 1660   | 760  | C0 |
| ATOM 2422 CG GLU A 157     | -27.085 | -36.782 | 19.391 | 1.00 | 100.82 |      | C0 |
| ANISOU 2422 CG GLU A 157   | 14260   | 10870   | 13190  | 1770 | 1650   | 930  | C0 |
| ATOM 2423 CD GLU A 157     | -27.539 | -37.933 | 20.273 | 1.00 | 102.20 |      | C0 |
| ANISOU 2423 CD GLU A 157   | 14650   | 10830   | 13350  | 1830 | 1720   | 1060 | C0 |
| ATOM 2424 OE1 GLU A 157    | -27.828 | -37.687 | 21.462 | 1.00 | 101.70 |      | O0 |
| ANISOU 2424 OE1 GLU A 157  | 14550   | 10860   | 13230  | 1830 | 1630   | 1170 | O0 |
| ATOM 2425 OE2 GLU A 157    | -27.594 | -39.074 | 19.772 | 1.00 | 102.68 |      | O0 |
| ANISOU 2425 OE2 GLU A 157  | 14920   | 10630   | 13460  | 1890 | 1870   | 1040 | O0 |
| ATOM 2426 H GLU A 157      | -30.437 | -34.490 | 17.867 | 1.00 | 93.39  |      | H0 |
| ANISOU 2426 H GLU A 157    | 13260   | 10090   | 12130  | 980  | 1530   | 550  | H0 |

|                            |         |         |        |      |        |      |    |
|----------------------------|---------|---------|--------|------|--------|------|----|
| ATOM 2427 HA GLU A 157     | -29.739 | -36.356 | 19.750 | 1.00 | 98.92  |      | H0 |
| ANISOU 2427 HA GLU A 157   | 14160   | 10560   | 12860  | 1300 | 1610   | 830  | H0 |
| ATOM 2428 HB2 GLU A 157    | -28.429 | -36.978 | 17.846 | 1.00 | 100.21 |      | H0 |
| ANISOU 2428 HB2 GLU A 157  | 14360   | 10590   | 13120  | 1470 | 1760   | 710  | H0 |
| ATOM 2429 HB3 GLU A 157    | -27.745 | -35.550 | 17.881 | 1.00 | 98.59  |      | H0 |
| ANISOU 2429 HB3 GLU A 157  | 13870   | 10690   | 12890  | 1490 | 1630   | 690  | H0 |
| ATOM 2430 HG2 GLU A 157    | -26.311 | -37.083 | 18.868 | 1.00 | 101.77 |      | H0 |
| ANISOU 2430 HG2 GLU A 157  | 14360   | 10960   | 13350  | 1910 | 1710   | 910  | H0 |
| ATOM 2431 HG3 GLU A 157    | -26.781 | -36.051 | 19.970 | 1.00 | 100.15 |      | H0 |
| ANISOU 2431 HG3 GLU A 157  | 14010   | 10970   | 13070  | 1800 | 1550   | 970  | H0 |
| ATOM 2432 N ASN A 158      | -29.148 | -34.530 | 21.288 | 1.00 | 100.81 |      | N0 |
| ANISOU 2432 N ASN A 158    | 14040   | 11240   | 13020  | 1350 | 1360   | 940  | N0 |
| ATOM 2433 CA ASN A 158     | -28.416 | -33.717 | 22.300 | 1.00 | 100.54 |      | C0 |
| ANISOU 2433 CA ASN A 158   | 13810   | 11450   | 12940  | 1450 | 1230   | 1030 | C0 |
| ATOM 2434 C ASN A 158      | -27.048 | -34.375 | 22.534 | 1.00 | 102.61 |      | C0 |
| ANISOU 2434 C ASN A 158    | 14030   | 11720   | 13230  | 1730 | 1260   | 1140 | C0 |
| ATOM 2435 O ASN A 158      | -26.934 | -35.179 | 23.490 | 1.00 | 103.97 |      | O0 |
| ANISOU 2435 O ASN A 158    | 14300   | 11830   | 13380  | 1870 | 1270   | 1290 | O0 |
| ATOM 2436 CB ASN A 158     | -29.179 | -33.597 | 23.627 | 1.00 | 100.73 |      | C0 |
| ANISOU 2436 CB ASN A 158   | 13860   | 11530   | 12890  | 1370 | 1160   | 1120 | C0 |
| ATOM 2437 CG ASN A 158     | -30.153 | -32.438 | 23.682 | 1.00 | 98.73  |      | C0 |
| ANISOU 2437 CG ASN A 158   | 13520   | 11400   | 12590  | 1140 | 1080   | 1030 | C0 |
| ATOM 2438 OD1 ASN A 158    | -30.447 | -31.806 | 22.667 | 1.00 | 97.70  |      | O0 |
| ANISOU 2438 OD1 ASN A 158  | 13340   | 11290   | 12480  | 1020 | 1090   | 900  | O0 |
| ATOM 2439 ND2 ASN A 158    | -30.658 | -32.149 | 24.871 | 1.00 | 97.55  |      | N0 |
| ANISOU 2439 ND2 ASN A 158  | 13350   | 11340   | 12370  | 1090 | 1010   | 1100 | N0 |
| ATOM 2440 H ASN A 158      | -29.729 | -35.123 | 21.662 | 1.00 | 100.91 |      | H0 |
| ANISOU 2440 H ASN A 158    | 14190   | 11140   | 13020  | 1310 | 1400   | 980  | H0 |
| ATOM 2441 HA ASN A 158     | -28.277 | -32.811 | 21.939 | 1.00 | 99.42  |      | H0 |
| ANISOU 2441 HA ASN A 158   | 13540   | 11450   | 12790  | 1380 | 1180   | 960  | H0 |
| ATOM 2442 HB2 ASN A 158    | -29.670 | -34.429 | 23.784 | 1.00 | 101.49 |      | H0 |
| ANISOU 2442 HB2 ASN A 158  | 14110   | 11460   | 12990  | 1360 | 1230   | 1170 | H0 |
| ATOM 2443 HB3 ASN A 158    | -28.530 | -33.492 | 24.353 | 1.00 | 101.21 |      | H0 |
| ANISOU 2443 HB3 ASN A 158  | 13830   | 11700   | 12920  | 1500 | 1110   | 1210 | H0 |
| ATOM 2444 HD21 ASN A 158   | -31.204 | -31.460 | 24.963 | 1.00 | 96.44  |      | H0 |
| ANISOU 2444 HD21 ASN A 158 | 13150   | 11280   | 12200  | 970  | 970    | 1050 | H0 |
| ATOM 2445 HD22 ASN A 158   | -30.451 | -32.644 | 25.573 | 1.00 | 98.77  |      | H0 |
| ANISOU 2445 HD22 ASN A 158 | 13540   | 11480   | 12510  | 1180 | 1010   | 1200 | H0 |
| ATOM 2446 N SER A 159      | -26.068 | -34.062 | 21.676 | 1.00 | 101.26 |      | N0 |
| ANISOU 2446 N SER A 159    | 13740   | 11630   | 13100  | 1820 | 1280   | 1070 | N0 |
| ATOM 2447 CA SER A 159     | -24.671 | -34.578 | 21.719 | 1.00 | 102.03 |      | C0 |
| ANISOU 2447 CA SER A 159   | 13760   | 11780   | 13230  | 2090 | 1300   | 1150 | C0 |
| ATOM 2448 C SER A 159      | -24.206 | -34.670 | 23.178 | 1.00 | 101.16 |      | C0 |
| ANISOU 2448 C SER A 159    | 13570   | 11810   | 13060  | 2250 | 1210   | 1320 | C0 |
| ATOM 2449 O SER A 159      | -23.772 | -35.760 | 23.605 | 1.00 | 104.75 |      | O0 |
| ANISOU 2449 O SER A 159    | 14130   | 12140   | 13530  | 2470 | 1270   | 1450 | O0 |
| ATOM 2450 CB SER A 159     | -23.750 | -33.705 | 20.895 | 1.00 | 101.97 |      | C0 |
| ANISOU 2450 CB SER A 159   | 13540   | 11950   | 13250  | 2100 | 1280   | 1040 | C0 |
| ATOM 2451 OG SER A 159     | -22.466 | -34.297 | 20.757 | 1.00 | 104.61 |      | O0 |
| ANISOU 2451 OG SER A 159   | 13800   | 12320   | 13620  | 2370 | 1330   | 1100 | O0 |
| ATOM 2452 H SER A 159      | -26.197 | -33.490 | 20.978 | 1.00 | 100.22 |      | H0 |
| ANISOU 2452 H SER A 159    | 13560   | 11540   | 12980  | 1710 | 1270   | 970  | H0 |
| ATOM 2453 HA SER A 159     | -24.669 | -35.495 | 21.332 | 1.00 | 103.12 |      | H0 |
| ANISOU 2453 HA SER A 159   | 14040   | 11720   | 13410  | 2170 | 1400   | 1160 | H0 |



|                           |         |         |        |            |       |      |    |
|---------------------------|---------|---------|--------|------------|-------|------|----|
| ATOM 2454 HB2 SER A 159   | -24.142 | -33.567 | 20.004 | 1.00101.14 |       |      | H0 |
| ANISOU 2454 HB2 SER A 159 | 13490   | 11770   | 13170  | 1980       | 1330  | 940  | H0 |
| ATOM 2455 HB3 SER A 159   | -23.660 | -32.827 | 21.329 | 1.00101.03 |       |      | H0 |
| ANISOU 2455 HB3 SER A 159 | 13280   | 12020   | 13090  | 2040       | 1190  | 1040 | H0 |
| ATOM 2456 N ASP A 160     | -24.319 | -33.556 | 23.903 | 1.00       | 96.93 |      | N0 |
| ANISOU 2456 N ASP A 160   | 12860   | 11510   | 12460  | 2140       | 1080  | 1310 | N0 |
| ATOM 2457 CA ASP A 160    | -24.072 | -33.438 | 25.364 | 1.00       | 94.38 |      | C0 |
| ANISOU 2457 CA ASP A 160  | 12460   | 11360   | 12050  | 2230       | 970   | 1450 | C0 |
| ATOM 2458 C ASP A 160     | -24.853 | -32.217 | 25.865 | 1.00       | 89.34 |      | C0 |
| ANISOU 2458 C ASP A 160   | 11730   | 10870   | 11340  | 1990       | 870   | 1390 | C0 |
| ATOM 2459 O ASP A 160     | -24.950 | -31.224 | 25.108 | 1.00       | 87.19 |      | O0 |
| ANISOU 2459 O ASP A 160   | 11360   | 10680   | 11090  | 1830       | 850   | 1250 | O0 |
| ATOM 2460 CB ASP A 160    | -22.570 | -33.363 | 25.657 | 1.00       | 96.62 |      | C0 |
| ANISOU 2460 CB ASP A 160  | 12530   | 11870   | 12320  | 2470       | 920   | 1520 | C0 |
| ATOM 2461 CG ASP A 160    | -22.218 | -33.081 | 27.109 | 1.00       | 98.25 |      | C0 |
| ANISOU 2461 CG ASP A 160  | 12600   | 12310   | 12420  | 2550       | 790   | 1640 | C0 |
| ATOM 2462 OD1 ASP A 160   | -23.087 | -33.297 | 27.980 | 1.00       | 99.54 |      | O0 |
| ANISOU 2462 OD1 ASP A 160 | 12900   | 12400   | 12520  | 2480       | 770   | 1720 | O0 |
| ATOM 2463 OD2 ASP A 160   | -21.073 | -32.650 | 27.360 | 1.00       | 99.08 |      | O0 |
| ANISOU 2463 OD2 ASP A 160 | 12480   | 12680   | 12490  | 2680       | 720   | 1650 | O0 |
| ATOM 2464 H ASP A 160     | -24.561 | -32.764 | 23.522 | 1.00       | 95.39 |      | H0 |
| ANISOU 2464 H ASP A 160   | 12600   | 11390   | 12260  | 2000       | 1050  | 1220 | H0 |
| ATOM 2465 HA ASP A 160    | -24.433 | -34.244 | 25.803 | 1.00       | 95.48 |      | H0 |
| ANISOU 2465 HA ASP A 160  | 12750   | 11350   | 12180  | 2290       | 1010  | 1550 | H0 |
| ATOM 2466 HB2 ASP A 160   | -22.159 | -34.215 | 25.407 | 1.00       | 98.10 |      | H0 |
| ANISOU 2466 HB2 ASP A 160 | 12790   | 11940   | 12550  | 2640       | 990   | 1570 | H0 |
| ATOM 2467 HB3 ASP A 160   | -22.172 | -32.662 | 25.104 | 1.00       | 95.78 |      | H0 |
| ANISOU 2467 HB3 ASP A 160 | 12280   | 11880   | 12230  | 2410       | 900   | 1420 | H0 |
| ATOM 2468 N ASP A 161     | -25.400 | -32.297 | 27.082 | 1.00       | 85.87 |      | N0 |
| ANISOU 2468 N ASP A 161   | 11340   | 10460   | 10830  | 1970       | 810   | 1490 | N0 |
| ATOM 2469 CA ASP A 161    | -26.296 | -31.264 | 27.669 | 1.00       | 81.41 |      | C0 |
| ANISOU 2469 CA ASP A 161  | 10720   | 10020   | 10200  | 1740       | 730   | 1440 | C0 |
| ATOM 2470 C ASP A 161     | -25.464 | -30.028 | 28.039 | 1.00       | 77.95 |      | C0 |
| ANISOU 2470 C ASP A 161   | 10020   | 9890    | 9710   | 1730       | 610   | 1390 | C0 |
| ATOM 2471 O ASP A 161     | -25.901 | -28.909 | 27.712 | 1.00       | 76.04 |      | O0 |
| ANISOU 2471 O ASP A 161   | 9710    | 9720    | 9460   | 1530       | 580   | 1270 | O0 |
| ATOM 2472 CB ASP A 161    | -27.070 | -31.820 | 28.870 | 1.00       | 81.99 |      | C0 |
| ANISOU 2472 CB ASP A 161  | 10930   | 10030   | 10190  | 1730       | 710   | 1570 | C0 |
| ATOM 2473 CG ASP A 161    | -27.852 | -33.093 | 28.578 | 1.00       | 82.84 |      | C0 |
| ANISOU 2473 CG ASP A 161  | 11310   | 9820    | 10350  | 1730       | 840   | 1610 | C0 |
| ATOM 2474 OD1 ASP A 161   | -28.557 | -33.128 | 27.545 | 1.00       | 81.30 |      | O0 |
| ANISOU 2474 OD1 ASP A 161 | 11200   | 9470    | 10210  | 1590       | 910   | 1490 | O0 |
| ATOM 2475 OD2 ASP A 161   | -27.745 | -34.045 | 29.385 | 1.00       | 84.45 |      | O0 |
| ANISOU 2475 OD2 ASP A 161 | 11630   | 9950    | 10510  | 1880       | 860   | 1770 | O0 |
| ATOM 2476 H ASP A 161     | -25.240 | -33.001 | 27.638 | 1.00       | 87.43 |      | H0 |
| ANISOU 2476 H ASP A 161   | 11600   | 10610   | 11000  | 2090       | 820   | 1600 | H0 |
| ATOM 2477 HA ASP A 161    | -26.951 | -31.002 | 26.980 | 1.00       | 80.07 |      | H0 |
| ANISOU 2477 HA ASP A 161  | 10600   | 9760    | 10060  | 1600       | 760   | 1340 | H0 |
| ATOM 2478 HB2 ASP A 161   | -26.440 | -32.008 | 29.594 | 1.00       | 83.21 |      | H0 |
| ANISOU 2478 HB2 ASP A 161 | 11030   | 10290   | 10300  | 1870       | 670   | 1670 | H0 |
| ATOM 2479 HB3 ASP A 161   | -27.700 | -31.140 | 29.184 | 1.00       | 80.81 |      | H0 |
| ANISOU 2479 HB3 ASP A 161 | 10750   | 9950    | 10010  | 1580       | 670   | 1520 | H0 |
| ATOM 2480 N SER A 162     | -24.301 | -30.230 | 28.671 | 1.00       | 76.39 |      | N0 |
| ANISOU 2480 N SER A 162   | 9690    | 9860    | 9470   | 1930       | 560   | 1490 | N0 |

|                           |         |         |        |      |       |      |    |
|---------------------------|---------|---------|--------|------|-------|------|----|
| ATOM 2481 CA SER A 162    | -23.406 | -29.162 | 29.195 | 1.00 | 73.99 | C0   |    |
| ANISOU 2481 CA SER A 162  | 9130    | 9880    | 9100   | 1920 | 450   | 1460 | C0 |
| ATOM 2482 C SER A 162     | -22.300 | -28.814 | 28.188 | 1.00 | 71.40 | C0   |    |
| ANISOU 2482 C SER A 162   | 8640    | 9650    | 8840   | 1980 | 470   | 1360 | C0 |
| ATOM 2483 O SER A 162     | -21.423 | -28.004 | 28.550 | 1.00 | 71.23 | O0   |    |
| ANISOU 2483 O SER A 162   | 8390    | 9910    | 8770   | 1980 | 390   | 1330 | O0 |
| ATOM 2484 CB SER A 162    | -22.813 | -29.566 | 30.526 | 1.00 | 75.39 | C0   |    |
| ANISOU 2484 CB SER A 162  | 9230    | 10230   | 9180   | 2100 | 360   | 1610 | C0 |
| ATOM 2485 OG SER A 162    | -23.764 | -29.425 | 31.569 | 1.00 | 75.11 | O0   |    |
| ANISOU 2485 OG SER A 162  | 9290    | 10200   | 9060   | 1990 | 320   | 1670 | O0 |
| ATOM 2486 H SER A 162     | -23.966 | -31.063 | 28.828 | 1.00 | 77.96 | H0   |    |
| ANISOU 2486 H SER A 162   | 9950    | 10000   | 9680   | 2090 | 590   | 1580 | H0 |
| ATOM 2487 HA SER A 162    | -23.958 | -28.346 | 29.338 | 1.00 | 72.44 | H0   |    |
| ANISOU 2487 HA SER A 162  | 8910    | 9740    | 8880   | 1750 | 410   | 1380 | H0 |
| ATOM 2488 HB2 SER A 162   | -22.514 | -30.502 | 30.480 | 1.00 | 76.95 | H0   |    |
| ANISOU 2488 HB2 SER A 162 | 9510    | 10330   | 9400   | 2280 | 410   | 1710 | H0 |
| ATOM 2489 HB3 SER A 162   | -22.030 | -29.004 | 30.722 | 1.00 | 75.94 | H0   |    |
| ANISOU 2489 HB3 SER A 162 | 9120    | 10520   | 9210   | 2130 | 300   | 1590 | H0 |
| ATOM 2490 N GLU A 163     | -22.349 | -29.385 | 26.977 | 1.00 | 68.88 | N0   |    |
| ANISOU 2490 N GLU A 163   | 8430    | 9120    | 8620   | 2010 | 590   | 1310 | N0 |
| ATOM 2491 CA GLU A 163    | -21.274 | -29.315 | 25.944 | 1.00 | 67.94 | C0   |    |
| ANISOU 2491 CA GLU A 163  | 8190    | 9060    | 8560   | 2100 | 640   | 1240 | C0 |
| ATOM 2492 C GLU A 163     | -20.689 | -27.897 | 25.869 | 1.00 | 64.49 | C0   |    |
| ANISOU 2492 C GLU A 163   | 7520    | 8890    | 8100   | 1960 | 570   | 1120 | C0 |
| ATOM 2493 O GLU A 163     | -19.461 | -27.759 | 26.014 | 1.00 | 65.60 | O0   |    |
| ANISOU 2493 O GLU A 163   | 7450    | 9260    | 8220   | 2080 | 540   | 1120 | O0 |
| ATOM 2494 CB GLU A 163    | -21.820 | -29.736 | 24.575 | 1.00 | 67.88 | C0   |    |
| ANISOU 2494 CB GLU A 163  | 8350    | 8790    | 8650   | 2040 | 760   | 1150 | C0 |
| ATOM 2495 CG GLU A 163    | -20.740 | -30.076 | 23.562 | 1.00 | 69.01 | C0   |    |
| ANISOU 2495 CG GLU A 163  | 8420    | 8940    | 8870   | 2190 | 840   | 1110 | C0 |
| ATOM 2496 CD GLU A 163    | -21.246 | -30.661 | 22.252 | 1.00 | 68.49 | C0   |    |
| ANISOU 2496 CD GLU A 163  | 8540    | 8600    | 8880   | 2150 | 970   | 1030 | C0 |
| ATOM 2497 OE1 GLU A 163   | -22.375 | -30.319 | 21.842 | 1.00 | 66.63 | O0   |    |
| ANISOU 2497 OE1 GLU A 163 | 8430    | 8230    | 8650   | 1940 | 990   | 950  | O0 |
| ATOM 2498 OE2 GLU A 163   | -20.506 | -31.460 | 21.642 | 1.00 | 70.41 | O0   |    |
| ANISOU 2498 OE2 GLU A 163 | 8800    | 8770    | 9180   | 2330 | 1060  | 1040 | O0 |
| ATOM 2499 H GLU A 163     | -23.070 | -29.864 | 26.701 | 1.00 | 68.72 | H0   |    |
| ANISOU 2499 H GLU A 163   | 8570    | 8910    | 8630   | 1980 | 640   | 1320 | H0 |
| ATOM 2500 HA GLU A 163    | -20.556 | -29.938 | 26.203 | 1.00 | 69.50 | H0   |    |
| ANISOU 2500 HA GLU A 163  | 8340    | 9310    | 8760   | 2300 | 640   | 1320 | H0 |
| ATOM 2501 HB2 GLU A 163   | -22.398 | -30.516 | 24.695 | 1.00 | 68.10 | H0   |    |
| ANISOU 2501 HB2 GLU A 163 | 8540    | 8640    | 8690   | 2080 | 800   | 1210 | H0 |
| ATOM 2502 HB3 GLU A 163   | -22.369 | -29.007 | 24.220 | 1.00 | 66.16 | H0   |    |
| ANISOU 2502 HB3 GLU A 163 | 8140    | 8560    | 8430   | 1860 | 750   | 1060 | H0 |
| ATOM 2503 HG2 GLU A 163   | -20.229 | -29.264 | 23.359 | 1.00 | 68.59 | H0   |    |
| ANISOU 2503 HG2 GLU A 163 | 8210    | 9050    | 8800   | 2120 | 810   | 1030 | H0 |
| ATOM 2504 HG3 GLU A 163   | -20.119 | -30.720 | 23.966 | 1.00 | 70.62 | H0   |    |
| ANISOU 2504 HG3 GLU A 163 | 8590    | 9180    | 9070   | 2380 | 840   | 1200 | H0 |
| ATOM 2505 N TYR A 164     | -21.540 | -26.889 | 25.654 | 1.00 | 59.67 | N0   |    |
| ANISOU 2505 N TYR A 164   | 6940    | 8260    | 7470   | 1710 | 550   | 1010 | N0 |
| ATOM 2506 CA TYR A 164    | -21.142 | -25.473 | 25.429 | 1.00 | 57.16 | C0   |    |
| ANISOU 2506 CA TYR A 164  | 6450    | 8130    | 7130   | 1550 | 520   | 880  | C0 |
| ATOM 2507 C TYR A 164     | -21.667 | -24.579 | 26.562 | 1.00 | 54.28 | C0   |    |
| ANISOU 2507 C TYR A 164   | 6040    | 7900    | 6680   | 1400 | 420   | 880  | C0 |

|                           |         |         |        |      |       |      |    |
|---------------------------|---------|---------|--------|------|-------|------|----|
| ATOM 2508 O TYR A 164     | -21.769 | -23.355 | 26.362 | 1.00 | 52.91 | O0   |    |
| ANISOU 2508 O TYR A 164   | 5800    | 7810    | 6490   | 1210 | 410   | 770  | O0 |
| ATOM 2509 CB TYR A 164    | -21.642 | -24.997 | 24.062 | 1.00 | 55.55 | C0   |    |
| ANISOU 2509 CB TYR A 164  | 6340    | 7770    | 7000   | 1390 | 600   | 760  | C0 |
| ATOM 2510 CG TYR A 164    | -21.178 | -25.830 | 22.893 | 1.00 | 56.60 | C0   |    |
| ANISOU 2510 CG TYR A 164  | 6520    | 7770    | 7210   | 1520 | 710   | 740  | C0 |
| ATOM 2511 CD1 TYR A 164   | -19.836 | -26.129 | 22.708 | 1.00 | 58.68 | C0   |    |
| ANISOU 2511 CD1 TYR A 164 | 6630    | 8180    | 7490   | 1680 | 730   | 750  | C0 |
| ATOM 2512 CD2 TYR A 164   | -22.079 | -26.310 | 21.956 | 1.00 | 55.79 | C0   |    |
| ANISOU 2512 CD2 TYR A 164 | 6620    | 7410    | 7160   | 1470 | 790   | 710  | C0 |
| ATOM 2513 CE1 TYR A 164   | -19.406 | -26.892 | 21.634 | 1.00 | 59.56 | C0   |    |
| ANISOU 2513 CE1 TYR A 164 | 6790    | 8160    | 7680   | 1800 | 830   | 730  | C0 |
| ATOM 2514 CE2 TYR A 164   | -21.666 | -27.073 | 20.877 | 1.00 | 56.79 | C0   |    |
| ANISOU 2514 CE2 TYR A 164 | 6800    | 7420    | 7360   | 1570 | 900   | 680  | C0 |
| ATOM 2515 CZ TYR A 164    | -20.325 | -27.366 | 20.714 | 1.00 | 58.55 | C0   |    |
| ANISOU 2515 CZ TYR A 164  | 6880    | 7770    | 7600   | 1740 | 920   | 690  | C0 |
| ATOM 2516 OH TYR A 164    | -19.920 | -28.113 | 19.646 | 1.00 | 60.75 | O0   |    |
| ANISOU 2516 OH TYR A 164  | 7210    | 7920    | 7950   | 1850 | 1030  | 660  | O0 |
| ATOM 2517 H TYR A 164     | -22.443 | -27.001 | 25.628 | 1.00 | 59.04 | H0   |    |
| ANISOU 2517 H TYR A 164   | 6990    | 8040    | 7400   | 1630 | 570   | 1010 | H0 |
| ATOM 2518 HA TYR A 164    | -20.153 | -25.421 | 25.433 | 1.00 | 58.15 | H0   |    |
| ANISOU 2518 HA TYR A 164  | 6430    | 8410    | 7250   | 1630 | 510   | 880  | H0 |
| ATOM 2519 HB2 TYR A 164   | -22.622 | -24.992 | 24.077 | 1.00 | 54.61 | H0   |    |
| ANISOU 2519 HB2 TYR A 164 | 6350    | 7530    | 6870   | 1310 | 610   | 760  | H0 |
| ATOM 2520 HB3 TYR A 164   | -21.341 | -24.074 | 23.927 | 1.00 | 55.19 | H0   |    |
| ANISOU 2520 HB3 TYR A 164 | 6190    | 7850    | 6930   | 1290 | 590   | 680  | H0 |
| ATOM 2521 HD1 TYR A 164   | -19.203 | -25.812 | 23.331 | 1.00 | 59.36 | H0   |    |
| ANISOU 2521 HD1 TYR A 164 | 6560    | 8450    | 7540   | 1720 | 670   | 770  | H0 |
| ATOM 2522 HD2 TYR A 164   | -22.996 | -26.119 | 22.059 | 1.00 | 54.80 | H0   |    |
| ANISOU 2522 HD2 TYR A 164 | 6590    | 7210    | 7020   | 1360 | 780   | 700  | H0 |
| ATOM 2523 HE1 TYR A 164   | -18.489 | -27.086 | 21.528 | 1.00 | 60.75 | H0   |    |
| ANISOU 2523 HE1 TYR A 164 | 6820    | 8420    | 7840   | 1920 | 850   | 740  | H0 |
| ATOM 2524 HE2 TYR A 164   | -22.297 | -27.392 | 20.253 | 1.00 | 56.25 | H0   |    |
| ANISOU 2524 HE2 TYR A 164 | 6870    | 7180    | 7320   | 1520 | 950   | 650  | H0 |
| ATOM 2525 N PHE A 165     | -21.960 | -25.157 | 27.728 | 1.00 | 53.35 | N0   |    |
| ANISOU 2525 N PHE A 165   | 5960    | 7810    | 6500   | 1480 | 360   | 1010 | N0 |
| ATOM 2526 CA PHE A 165    | -22.460 | -24.412 | 28.912 | 1.00 | 51.68 | C0   |    |
| ANISOU 2526 CA PHE A 165  | 5720    | 7730    | 6190   | 1360 | 270   | 1010 | C0 |
| ATOM 2527 C PHE A 165     | -21.282 | -23.752 | 29.634 | 1.00 | 51.83 | C0   |    |
| ANISOU 2527 C PHE A 165   | 5490    | 8080    | 6130   | 1380 | 180   | 990  | C0 |
| ATOM 2528 O PHE A 165     | -20.261 | -24.419 | 29.851 | 1.00 | 53.23 | O0   |    |
| ANISOU 2528 O PHE A 165   | 5550    | 8380    | 6290   | 1580 | 160   | 1070 | O0 |
| ATOM 2529 CB PHE A 165    | -23.244 | -25.322 | 29.858 | 1.00 | 52.11 | C0   |    |
| ANISOU 2529 CB PHE A 165  | 5920    | 7680    | 6200   | 1430 | 250   | 1150 | C0 |
| ATOM 2530 CG PHE A 165    | -24.001 | -24.555 | 30.911 | 1.00 | 51.44 | C0   |    |
| ANISOU 2530 CG PHE A 165  | 5840    | 7690    | 6020   | 1280 | 180   | 1140 | C0 |
| ATOM 2531 CD1 PHE A 165   | -25.135 | -23.832 | 30.572 | 1.00 | 48.93 | C0   |    |
| ANISOU 2531 CD1 PHE A 165 | 5620    | 7250    | 5720   | 1080 | 200   | 1040 | C0 |
| ATOM 2532 CD2 PHE A 165   | -23.553 | -24.514 | 32.224 | 1.00 | 52.42 | C0   |    |
| ANISOU 2532 CD2 PHE A 165 | 5860    | 8030    | 6030   | 1340 | 80    | 1220 | C0 |
| ATOM 2533 CE1 PHE A 165   | -25.822 | -23.105 | 31.531 | 1.00 | 48.19 | C0   |    |
| ANISOU 2533 CE1 PHE A 165 | 5520    | 7250    | 5540   | 940  | 150   | 1020 | C0 |
| ATOM 2534 CE2 PHE A 165   | -24.243 | -23.785 | 33.180 | 1.00 | 51.89 | C0   |    |
| ANISOU 2534 CE2 PHE A 165 | 5790    | 8050    | 5870   | 1190 | 30    | 1200 | C0 |

|                           |         |         |        |      |       |      |
|---------------------------|---------|---------|--------|------|-------|------|
| ATOM 2535 CZ PHE A 165    | -25.376 | -23.083 | 32.832 | 1.00 | 49.81 | C0   |
| ANISOU 2535 CZ PHE A 165  | 5630    | 7660    | 5640   | 990  | 60    | 1100 |
| ATOM 2536 H PHE A 165     | -21.862 | -26.046 | 27.890 | 1.00 | 54.45 | H0   |
| ANISOU 2536 H PHE A 165   | 6160    | 7880    | 6650   | 1630 | 380   | 1100 |
| ATOM 2537 HA PHE A 165    | -23.068 | -23.697 | 28.595 | 1.00 | 50.29 | H0   |
| ANISOU 2537 HA PHE A 165  | 5580    | 7500    | 6020   | 1200 | 280   | 930  |
| ATOM 2538 HB2 PHE A 165   | -23.876 | -25.854 | 29.331 | 1.00 | 51.63 | H0   |
| ANISOU 2538 HB2 PHE A 165 | 6010    | 7420    | 6190   | 1430 | 310   | 1160 |
| ATOM 2539 HB3 PHE A 165   | -22.619 | -25.937 | 30.294 | 1.00 | 53.64 | H0   |
| ANISOU 2539 HB3 PHE A 165 | 6070    | 7950    | 6360   | 1590 | 220   | 1240 |
| ATOM 2540 HD1 PHE A 165   | -25.445 | -23.843 | 29.681 | 1.00 | 48.24 | H0   |
| ANISOU 2540 HD1 PHE A 165 | 5600    | 7030    | 5700   | 1040 | 260   | 990  |
| ATOM 2541 HD2 PHE A 165   | -22.777 | -24.993 | 32.467 | 1.00 | 53.94 | H0   |
| ANISOU 2541 HD2 PHE A 165 | 5970    | 8320    | 6200   | 1490 | 60    | 1290 |
| ATOM 2542 HE1 PHE A 165   | -26.598 | -22.626 | 31.289 | 1.00 | 47.13 | H0   |
| ANISOU 2542 HE1 PHE A 165 | 5450    | 7030    | 5420   | 820  | 170   | 960  |
| ATOM 2543 HE2 PHE A 165   | -23.937 | -23.773 | 34.070 | 1.00 | 52.78 | H0   |
| ANISOU 2543 HE2 PHE A 165 | 5830    | 8320    | 5900   | 1230 | -40   | 1250 |
| ATOM 2544 HZ PHE A 165    | -25.847 | -22.590 | 33.485 | 1.00 | 49.40 | H0   |
| ANISOU 2544 HZ PHE A 165  | 5580    | 7660    | 5520   | 900  | 30    | 1080 |
| ATOM 2545 N SER A 166     | -21.431 | -22.473 | 29.991 | 1.00 | 50.62 | N0   |
| ANISOU 2545 N SER A 166   | 5260    | 8060    | 5920   | 1180 | 140   | 890  |
| ATOM 2546 CA SER A 166    | -20.395 | -21.653 | 30.672 | 1.00 | 51.97 | C0   |
| ANISOU 2546 CA SER A 166  | 5190    | 8550    | 6010   | 1140 | 60    | 840  |
| ATOM 2547 C SER A 166     | -20.029 | -22.296 | 32.013 | 1.00 | 54.04 | C0   |
| ANISOU 2547 C SER A 166   | 5380    | 8990    | 6160   | 1290 | -30   | 970  |
| ATOM 2548 O SER A 166     | -20.929 | -22.478 | 32.855 | 1.00 | 54.14 | O0   |
| ANISOU 2548 O SER A 166   | 5510    | 8950    | 6110   | 1270 | -70   | 1040 |
| ATOM 2549 CB SER A 166    | -20.853 | -20.229 | 30.859 | 1.00 | 50.51 | C0   |
| ANISOU 2549 CB SER A 166  | 4990    | 8420    | 5780   | 880  | 50    | 700  |
| ATOM 2550 OG SER A 166    | -19.864 | -19.464 | 31.532 | 1.00 | 51.58 | O0   |
| ANISOU 2550 OG SER A 166  | 4910    | 8860    | 5830   | 820  | -10   | 640  |
| ATOM 2551 H SER A 166     | -22.197 | -22.003 | 29.839 | 1.00 | 49.48 | H0   |
| ANISOU 2551 H SER A 166   | 5200    | 7820    | 5780   | 1050 | 160   | 840  |
| ATOM 2552 HA SER A 166    | -19.584 | -21.648 | 30.096 | 1.00 | 52.59 | H0   |
| ANISOU 2552 HA SER A 166  | 5160    | 8700    | 6120   | 1180 | 90    | 800  |
| ATOM 2553 HB2 SER A 166   | -21.038 | -19.826 | 29.981 | 1.00 | 49.52 | H0   |
| ANISOU 2553 HB2 SER A 166 | 4910    | 8180    | 5720   | 790  | 110   | 620  |
| ATOM 2554 HB3 SER A 166   | -21.687 | -20.220 | 31.382 | 1.00 | 49.85 | H0   |
| ANISOU 2554 HB3 SER A 166 | 5010    | 8270    | 5670   | 830  | 30    | 730  |
| ATOM 2555 N GLN A 167     | -18.747 | -22.613 | 32.201 | 1.00 | 56.39 | N0   |
| ANISOU 2555 N GLN A 167   | 5480    | 9520    | 6420   | 1450 | -80   | 1010 |
| ATOM 2556 CA GLN A 167    | -18.200 | -23.175 | 33.463 | 1.00 | 58.83 | C0   |
| ANISOU 2556 CA GLN A 167  | 5680    | 10060   | 6610   | 1620 | -180  | 1140 |
| ATOM 2557 C GLN A 167     | -18.157 | -22.080 | 34.537 | 1.00 | 58.63 | C0   |
| ANISOU 2557 C GLN A 167   | 5520    | 10300   | 6450   | 1440 | -280  | 1070 |
| ATOM 2558 O GLN A 167     | -17.817 | -22.410 | 35.686 | 1.00 | 60.31 | O0   |
| ANISOU 2558 O GLN A 167   | 5650    | 10730   | 6540   | 1550 | -380  | 1170 |
| ATOM 2559 CB GLN A 167    | -16.810 | -23.772 | 33.221 | 1.00 | 61.68 | C0   |
| ANISOU 2559 CB GLN A 167  | 5840    | 10610   | 6980   | 1850 | -200  | 1190 |
| ATOM 2560 CG GLN A 167    | -15.733 | -22.729 | 32.947 | 1.00 | 62.85 | C0   |
| ANISOU 2560 CG GLN A 167  | 5720    | 11050   | 7110   | 1730 | -220  | 1030 |
| ATOM 2561 CD GLN A 167    | -14.448 | -23.330 | 32.433 | 1.00 | 65.30 | C0   |
| ANISOU 2561 CD GLN A 167  | 5840    | 11510   | 7450   | 1950 | -200  | 1060 |

|        |      |      |     |   |     |         |         |        |      |       |      |    |
|--------|------|------|-----|---|-----|---------|---------|--------|------|-------|------|----|
| ATOM   | 2562 | OE1  | GLN | A | 167 | -13.996 | -23.028 | 31.329 | 1.00 | 65.38 | O0   |    |
| ANISOU | 2562 | OE1  | GLN | A | 167 | 5800    | 11490   | 7550   | 1890 | -120  | 950  | O0 |
| ATOM   | 2563 | NE2  | GLN | A | 167 | -13.843 | -24.188 | 33.239 | 1.00 | 67.84 | N0   |    |
| ANISOU | 2563 | NE2  | GLN | A | 167 | 6070    | 12010   | 7690   | 2210 | -280  | 1210 | N0 |
| ATOM   | 2564 | H    | GLN | A | 167 | -18.122 | -22.508 | 31.548 | 1.00 | 56.70 | H0   |    |
| ANISOU | 2564 | H    | GLN | A | 167 | 5430    | 9600    | 6510   | 1470 | -40   | 960  | H0 |
| ATOM   | 2565 | HA   | GLN | A | 167 | -18.803 | -23.892 | 33.769 | 1.00 | 58.78 | H0   |    |
| ANISOU | 2565 | HA   | GLN | A | 167 | 5820    | 9910    | 6600   | 1710 | -180  | 1250 | H0 |
| ATOM   | 2566 | HB2  | GLN | A | 167 | -16.555 | -24.297 | 34.008 | 1.00 | 63.12 | H0   |    |
| ANISOU | 2566 | HB2  | GLN | A | 167 | 5990    | 10910   | 7090   | 2000 | -260  | 1300 | H0 |
| ATOM   | 2567 | HB3  | GLN | A | 167 | -16.863 | -24.385 | 32.457 | 1.00 | 61.49 | H0   |    |
| ANISOU | 2567 | HB3  | GLN | A | 167 | 5910    | 10410   | 7050   | 1950 | -120  | 1220 | H0 |
| ATOM   | 2568 | HG2  | GLN | A | 167 | -16.068 | -22.083 | 32.291 | 1.00 | 61.37 | H0   |    |
| ANISOU | 2568 | HG2  | GLN | A | 167 | 5580    | 10750   | 6980   | 1560 | -160  | 920  | H0 |
| ATOM   | 2569 | HG3  | GLN | A | 167 | -15.542 | -22.240 | 33.776 | 1.00 | 63.44 | H0   |    |
| ANISOU | 2569 | HG3  | GLN | A | 167 | 5690    | 11340   | 7080   | 1660 | -290  | 1010 | H0 |
| ATOM   | 2570 | HE21 | GLN | A | 167 | -13.194 | -24.702 | 32.931 | 1.00 | 69.02 | H0   |    |
| ANISOU | 2570 | HE21 | GLN | A | 167 | 6140    | 12210   | 7870   | 2380 | -260  | 1250 | H0 |
| ATOM   | 2571 | HE22 | GLN | A | 167 | -14.088 | -24.247 | 34.087 | 1.00 | 68.15 | H0   |    |
| ANISOU | 2571 | HE22 | GLN | A | 167 | 6120    | 12120   | 7650   | 2220 | -350  | 1280 | H0 |
| ATOM   | 2572 | N    | TYR | A | 168 | -18.473 | -20.830 | 34.178 | 1.00 | 56.79 | N0   |    |
| ANISOU | 2572 | N    | TYR | A | 168 | 5280    | 10060   | 6240   | 1170 | -250  | 900  | N0 |
| ATOM   | 2573 | CA   | TYR | A | 168 | -18.366 | -19.639 | 35.062 | 1.00 | 56.99 | C0   |    |
| ANISOU | 2573 | CA   | TYR | A | 168 | 5190    | 10320   | 6150   | 970  | -310  | 790  | C0 |
| ATOM   | 2574 | C    | TYR | A | 168 | -19.747 | -19.231 | 35.596 | 1.00 | 54.62 | C0   |    |
| ANISOU | 2574 | C    | TYR | A | 168 | 5080    | 9850    | 5820   | 820  | -310  | 780  | C0 |
| ATOM   | 2575 | O    | TYR | A | 168 | -19.802 | -18.333 | 36.452 | 1.00 | 54.95 | O0   |    |
| ANISOU | 2575 | O    | TYR | A | 168 | 5060    | 10070   | 5760   | 660  | -360  | 700  | O0 |
| ATOM   | 2576 | CB   | TYR | A | 168 | -17.659 | -18.504 | 34.318 | 1.00 | 57.12 | C0   |    |
| ANISOU | 2576 | CB   | TYR | A | 168 | 5060    | 10440   | 6200   | 780  | -270  | 600  | C0 |
| ATOM   | 2577 | CG   | TYR | A | 168 | -16.255 | -18.846 | 33.883 | 1.00 | 59.24 | C0   |    |
| ANISOU | 2577 | CG   | TYR | A | 168 | 5100    | 10920   | 6480   | 910  | -270  | 600  | C0 |
| ATOM   | 2578 | CD1  | TYR | A | 168 | -15.287 | -19.183 | 34.815 | 1.00 | 61.45 | C0   |    |
| ANISOU | 2578 | CD1  | TYR | A | 168 | 5160    | 11540   | 6650   | 1050 | -380  | 660  | C0 |
| ATOM   | 2579 | CD2  | TYR | A | 168 | -15.893 | -18.851 | 32.543 | 1.00 | 58.80 | C0   |    |
| ANISOU | 2579 | CD2  | TYR | A | 168 | 5050    | 10740   | 6550   | 920  | -170  | 540  | C0 |
| ATOM   | 2580 | CE1  | TYR | A | 168 | -13.997 | -19.513 | 34.432 | 1.00 | 63.26 | C0   |    |
| ANISOU | 2580 | CE1  | TYR | A | 168 | 5160    | 11990   | 6880   | 1190 | -390  | 660  | C0 |
| ATOM   | 2581 | CE2  | TYR | A | 168 | -14.604 | -19.175 | 32.143 | 1.00 | 60.69 | C0   |    |
| ANISOU | 2581 | CE2  | TYR | A | 168 | 5070    | 11180   | 6810   | 1050 | -170  | 530  | C0 |
| ATOM   | 2582 | CZ   | TYR | A | 168 | -13.653 | -19.505 | 33.093 | 1.00 | 63.04 | C0   |    |
| ANISOU | 2582 | CZ   | TYR | A | 168 | 5140    | 11830   | 6990   | 1180 | -280  | 590  | C0 |
| ATOM   | 2583 | OH   | TYR | A | 168 | -12.379 | -19.827 | 32.719 | 1.00 | 65.75 | O0   |    |
| ANISOU | 2583 | OH   | TYR | A | 168 | 5250    | 12400   | 7340   | 1320 | -280  | 580  | O0 |
| ATOM   | 2584 | H    | TYR | A | 168 | -18.758 | -20.608 | 33.345 | 1.00 | 55.69 | H0   |    |
| ANISOU | 2584 | H    | TYR | A | 168 | 5220    | 9760    | 6190   | 1100 | -170  | 840  | H0 |
| ATOM   | 2585 | HA   | TYR | A | 168 | -17.806 | -19.886 | 35.841 | 1.00 | 58.50 | H0   |    |
| ANISOU | 2585 | HA   | TYR | A | 168 | 5250    | 10730   | 6250   | 1060 | -390  | 850  | H0 |
| ATOM   | 2586 | HB2  | TYR | A | 168 | -18.190 | -18.270 | 33.529 | 1.00 | 55.64 | H0   |    |
| ANISOU | 2586 | HB2  | TYR | A | 168 | 5000    | 10040   | 6100   | 700  | -190  | 550  | H0 |
| ATOM   | 2587 | HB3  | TYR | A | 168 | -17.628 | -17.719 | 34.904 | 1.00 | 57.28 | H0   |    |
| ANISOU | 2587 | HB3  | TYR | A | 168 | 5020    | 10600   | 6150   | 630  | -300  | 520  | H0 |
| ATOM   | 2588 | HD1  | TYR | A | 168 | -15.512 | -19.191 | 35.731 | 1.00 | 61.95 | H0   |    |
| ANISOU | 2588 | HD1  | TYR | A | 168 | 5230    | 11700   | 6620   | 1050 | -450  | 710  | H0 |

|                           |                        |                |    |
|---------------------------|------------------------|----------------|----|
| ATOM 2589 HD2 TYR A 168   | -16.535 -18.627 31.889 | 1.00 57.25     | H0 |
| ANISOU 2589 HD2 TYR A 168 | 5000 10320 6430        | 830 -100 500   | H0 |
| ATOM 2590 HE1 TYR A 168   | -13.352 -19.735 35.084 | 1.00 65.15     | H0 |
| ANISOU 2590 HE1 TYR A 168 | 5240 12470 7040        | 1280 -470 700  | H0 |
| ATOM 2591 HE2 TYR A 168   | -14.376 -19.169 31.228 | 1.00 60.31     | H0 |
| ANISOU 2591 HE2 TYR A 168 | 5030 11050 6840        | 1040 -90 480   | H0 |
| ATOM 2592 N SER A 169     | -20.822 -19.873 35.132 | 1.00 52.49     | N0 |
| ANISOU 2592 N SER A 169   | 5040 9270 5630         | 860 -250 850   | N0 |
| ATOM 2593 CA SER A 169    | -22.187 -19.736 35.702 | 1.00 50.84     | C0 |
| ANISOU 2593 CA SER A 169  | 5010 8910 5390         | 760 -240 870   | C0 |
| ATOM 2594 C SER A 169     | -22.176 -20.198 37.164 | 1.00 52.58     | C0 |
| ANISOU 2594 C SER A 169   | 5200 9310 5470         | 850 -340 990   | C0 |
| ATOM 2595 O SER A 169     | -21.433 -21.137 37.485 | 1.00 54.03     | O0 |
| ANISOU 2595 O SER A 169   | 5320 9600 5610         | 1060 -380 1120 | O0 |
| ATOM 2596 CB SER A 169    | -23.197 -20.518 34.903 | 1.00 49.03     | C0 |
| ANISOU 2596 CB SER A 169  | 5000 8350 5280         | 820 -160 930   | C0 |
| ATOM 2597 OG SER A 169    | -24.493 -20.424 35.483 | 1.00 47.02     | O0 |
| ANISOU 2597 OG SER A 169  | 4900 7980 4990         | 720 -150 950   | O0 |
| ATOM 2598 H SER A 169     | -20.800 -20.441 34.422 | 1.00 52.36     | H0 |
| ANISOU 2598 H SER A 169   | 5080 9120 5700         | 950 -200 890   | H0 |
| ATOM 2599 HA SER A 169    | -22.438 -18.774 35.678 | 1.00 50.07     | H0 |
| ANISOU 2599 HA SER A 169  | 4910 8830 5290         | 590 -230 750   | H0 |
| ATOM 2600 HB2 SER A 169   | -23.223 -20.174 33.984 | 1.00 47.99     | H0 |
| ANISOU 2600 HB2 SER A 169 | 4890 8120 5230         | 760 -100 850   | H0 |
| ATOM 2601 HB3 SER A 169   | -22.923 -21.462 34.867 | 1.00 49.77     | H0 |
| ANISOU 2601 HB3 SER A 169 | 5120 8410 5380         | 980 -160 1040  | H0 |
| ATOM 2602 N ARG A 170     | -22.990 -19.568 38.012 | 1.00 52.87     | N0 |
| ANISOU 2602 N ARG A 170   | 5300 9370 5420         | 690 -360 950   | N0 |
| ATOM 2603 CA ARG A 170    | -23.239 -20.021 39.408 | 1.00 54.81     | C0 |
| ANISOU 2603 CA ARG A 170  | 5560 9740 5520         | 760 -440 1070  | C0 |
| ATOM 2604 C ARG A 170     | -23.941 -21.386 39.384 | 1.00 54.40     | C0 |
| ANISOU 2604 C ARG A 170   | 5700 9460 5510         | 920 -400 1250  | C0 |
| ATOM 2605 O ARG A 170     | -23.910 -22.077 40.425 | 1.00 55.50     | O0 |
| ANISOU 2605 O ARG A 170   | 5860 9700 5530         | 1040 -460 1390 | O0 |
| ATOM 2606 CB ARG A 170    | -24.078 -18.990 40.169 | 1.00 54.93     | C0 |
| ANISOU 2606 CB ARG A 170  | 5620 9800 5450         | 540 -450 970   | C0 |
| ATOM 2607 CG ARG A 170    | -23.314 -17.736 40.568 | 1.00 56.83     | C0 |
| ANISOU 2607 CG ARG A 170  | 5670 10310 5610        | 380 -490 810   | C0 |
| ATOM 2608 CD ARG A 170    | -24.213 -16.732 41.261 | 1.00 57.39     | C0 |
| ANISOU 2608 CD ARG A 170  | 5810 10380 5610        | 170 -480 700   | C0 |
| ATOM 2609 NE ARG A 170    | -25.197 -16.169 40.340 | 1.00 56.78     | N0 |
| ANISOU 2609 NE ARG A 170  | 5890 10020 5660        | 50 -380 600    | N0 |
| ATOM 2610 CZ ARG A 170    | -26.217 -15.384 40.689 | 1.00 56.58     | C0 |
| ANISOU 2610 CZ ARG A 170  | 5960 9920 5610         | -100 -340 520  | C0 |
| ATOM 2611 NH1 ARG A 170   | -26.406 -15.056 41.958 | 1.00 58.26     | N0 |
| ANISOU 2611 NH1 ARG A 170 | 6150 10300 5680        | -170 -390 500  | N0 |
| ATOM 2612 NH2 ARG A 170   | -27.046 -14.929 39.763 | 1.00 54.79     | N0 |
| ANISOU 2612 NH2 ARG A 170 | 5860 9450 5510         | -180 -250 440  | N0 |
| ATOM 2613 H ARG A 170     | -23.445 -18.813 37.783 | 1.00 51.72     | H0 |
| ANISOU 2613 H ARG A 170   | 5190 9160 5300         | 550 -330 850   | H0 |
| ATOM 2614 HA ARG A 170    | -22.370 -20.121 39.861 | 1.00 56.31     | H0 |
| ANISOU 2614 HA ARG A 170  | 5610 10150 5640        | 830 -500 1100  | H0 |
| ATOM 2615 HB2 ARG A 170   | -24.840 -18.732 39.608 | 1.00 53.50     | H0 |
| ANISOU 2615 HB2 ARG A 170 | 5550 9420 5350         | 460 -380 910   | H0 |

|                            |         |         |        |      |       |      |
|----------------------------|---------|---------|--------|------|-------|------|
| ATOM 2616 HB3 ARG A 170    | -24.432 | -19.414 | 40.979 | 1.00 | 55.58 | H0   |
| ANISOU 2616 HB3 ARG A 170  | 5750    | 9910    | 5450   | 580  | -480  | 1060 |
| ATOM 2617 HG2 ARG A 170    | -22.580 | -17.980 | 41.171 | 1.00 | 58.43 | H0   |
| ANISOU 2617 HG2 ARG A 170  | 5750    | 10720   | 5720   | 450  | -570  | 860  |
| ATOM 2618 HG3 ARG A 170    | -22.927 | -17.322 | 39.768 | 1.00 | 56.38 | H0   |
| ANISOU 2618 HG3 ARG A 170  | 5570    | 10220   | 5630   | 330  | -460  | 720  |
| ATOM 2619 HD2 ARG A 170    | -24.679 | -17.175 | 42.000 | 1.00 | 57.85 | H0   |
| ANISOU 2619 HD2 ARG A 170  | 5930    | 10450   | 5600   | 210  | -510  | 780  |
| ATOM 2620 HD3 ARG A 170    | -23.666 | -16.008 | 41.635 | 1.00 | 58.16 | H0   |
| ANISOU 2620 HD3 ARG A 170  | 5790    | 10660   | 5640   | 70   | -520  | 600  |
| ATOM 2621 HE ARG A 170     | -25.110 | -16.358 | 39.493 | 1.00 | 56.05 | H0   |
| ANISOU 2621 HE ARG A 170   | 5820    | 9810    | 5670   | 90   | -340  | 600  |
| ATOM 2622 HH11 ARG A 170   | -25.859 | -15.351 | 42.578 | 1.00 | 59.15 | H0   |
| ANISOU 2622 HH11 ARG A 170 | 6180    | 10590   | 5710   | -120 | -460  | 550  |
| ATOM 2623 HH12 ARG A 170   | -27.081 | -14.537 | 42.179 | 1.00 | 57.30 | H0   |
| ANISOU 2623 HH12 ARG A 170 | 6100    | 10130   | 5550   | -270 | -360  | 440  |
| ATOM 2624 HH21 ARG A 170   | -26.923 | -15.147 | 38.918 | 1.00 | 54.23 | H0   |
| ANISOU 2624 HH21 ARG A 170 | 5810    | 9270    | 5520   | -130 | -220  | 450  |
| ATOM 2625 HH22 ARG A 170   | -27.721 | -14.411 | 39.993 | 1.00 | 54.20 | H0   |
| ANISOU 2625 HH22 ARG A 170 | 5850    | 9330    | 5420   | -260 | -230  | 390  |
| ATOM 2626 N PHE A 171      | -24.531 | -21.761 | 38.240 | 1.00 | 52.64 | N0   |
| ANISOU 2626 N PHE A 171    | 5620    | 8950    | 5430   | 930  | -300  | 1240 |
| ATOM 2627 CA PHE A 171     | -25.404 | -22.953 | 38.066 | 1.00 | 52.43 | C0   |
| ANISOU 2627 CA PHE A 171   | 5810    | 8650    | 5460   | 1030 | -240  | 1370 |
| ATOM 2628 C PHE A 171      | -24.729 | -24.001 | 37.176 | 1.00 | 53.34 | C0   |
| ANISOU 2628 C PHE A 171    | 5950    | 8650    | 5670   | 1230 | -190  | 1450 |
| ATOM 2629 O PHE A 171      | -23.768 | -23.672 | 36.454 | 1.00 | 53.71 | O0   |
| ANISOU 2629 O PHE A 171    | 5850    | 8780    | 5770   | 1260 | -190  | 1380 |
| ATOM 2630 CB PHE A 171     | -26.755 | -22.502 | 37.513 | 1.00 | 49.71 | C0   |
| ANISOU 2630 CB PHE A 171   | 5620    | 8080    | 5190   | 850  | -160  | 1270 |
| ATOM 2631 CG PHE A 171     | -27.399 | -21.453 | 38.378 | 1.00 | 49.25 | C0   |
| ANISOU 2631 CG PHE A 171   | 5540    | 8140    | 5040   | 660  | -200  | 1180 |
| ATOM 2632 CD1 PHE A 171    | -28.130 | -21.815 | 39.500 | 1.00 | 49.99 | C0   |
| ANISOU 2632 CD1 PHE A 171  | 5720    | 8250    | 5020   | 650  | -220  | 1270 |
| ATOM 2633 CD2 PHE A 171    | -27.218 | -20.106 | 38.113 | 1.00 | 48.37 | C0   |
| ANISOU 2633 CD2 PHE A 171  | 5320    | 8120    | 4930   | 500  | -200  | 1010 |
| ATOM 2634 CE1 PHE A 171    | -28.698 | -20.850 | 40.317 | 1.00 | 49.80 | C0   |
| ANISOU 2634 CE1 PHE A 171  | 5670    | 8340    | 4910   | 490  | -240  | 1190 |
| ATOM 2635 CE2 PHE A 171    | -27.787 | -19.142 | 38.930 | 1.00 | 48.26 | C0   |
| ANISOU 2635 CE2 PHE A 171  | 5300    | 8200    | 4830   | 340  | -220  | 930  |
| ATOM 2636 CZ PHE A 171     | -28.527 | -19.515 | 40.029 | 1.00 | 48.90 | C0   |
| ANISOU 2636 CZ PHE A 171   | 5460    | 8310    | 4810   | 340  | -240  | 1010 |
| ATOM 2637 H PHE A 171      | -24.456 | -21.286 | 37.469 | 1.00 | 51.83 | H0   |
| ANISOU 2637 H PHE A 171    | 5500    | 8790    | 5400   | 860  | -260  | 1140 |
| ATOM 2638 HA PHE A 171     | -25.555 | -23.359 | 38.956 | 1.00 | 53.28 | H0   |
| ANISOU 2638 HA PHE A 171   | 5950    | 8820    | 5470   | 1080 | -280  | 1470 |
| ATOM 2639 HB2 PHE A 171    | -26.624 | -22.143 | 36.610 | 1.00 | 49.03 | H0   |
| ANISOU 2639 HB2 PHE A 171  | 5510    | 7930    | 5190   | 800  | -120  | 1180 |
| ATOM 2640 HB3 PHE A 171    | -27.347 | -23.280 | 37.450 | 1.00 | 49.84 | H0   |
| ANISOU 2640 HB3 PHE A 171  | 5770    | 7940    | 5230   | 890  | -120  | 1350 |
| ATOM 2641 HD1 PHE A 171    | -28.251 | -22.729 | 39.702 | 1.00 | 50.71 | H0   |
| ANISOU 2641 HD1 PHE A 171  | 5890    | 8270    | 5110   | 750  | -200  | 1390 |
| ATOM 2642 HD2 PHE A 171    | -26.712 | -19.844 | 37.361 | 1.00 | 48.17 | H0   |
| ANISOU 2642 HD2 PHE A 171  | 5240    | 8090    | 4970   | 500  | -180  | 960  |

|                           |         |         |        |      |       |      |    |
|---------------------------|---------|---------|--------|------|-------|------|----|
| ATOM 2643 HE1 PHE A 171   | -29.206 | -21.109 | 41.069 | 1.00 | 50.11 | H0   |    |
| ANISOU 2643 HE1 PHE A 171 | 5770    | 8390    | 4870   | 480  | -250  | 1250 | H0 |
| ATOM 2644 HE2 PHE A 171   | -27.669 | -18.227 | 38.730 | 1.00 | 47.73 | H0   |    |
| ANISOU 2644 HE2 PHE A 171 | 5180    | 8180    | 4770   | 240  | -220  | 810  | H0 |
| ATOM 2645 HZ PHE A 171    | -28.914 | -18.857 | 40.584 | 1.00 | 48.66 | H0   |    |
| ANISOU 2645 HZ PHE A 171  | 5430    | 8340    | 4720   | 230  | -250  | 950  | H0 |
| ATOM 2646 N GLU A 172     | -25.219 | -25.241 | 37.257 | 1.00 | 54.10 | N0   |    |
| ANISOU 2646 N GLU A 172   | 6220    | 8550    | 5790   | 1360 | -150  | 1600 | N0 |
| ATOM 2647 CA GLU A 172    | -24.795 | -26.377 | 36.397 | 1.00 | 55.32 | C0   |    |
| ANISOU 2647 CA GLU A 172  | 6450    | 8520    | 6040   | 1550 | -80   | 1680 | C0 |
| ATOM 2648 C GLU A 172     | -26.042 | -27.114 | 35.902 | 1.00 | 54.28 | C0   |    |
| ANISOU 2648 C GLU A 172   | 6580    | 8060    | 5990   | 1500 | 30    | 1710 | C0 |
| ATOM 2649 O GLU A 172     | -27.061 | -27.097 | 36.614 | 1.00 | 53.90 | O0   |    |
| ANISOU 2649 O GLU A 172   | 6640    | 7960    | 5880   | 1390 | 30    | 1730 | O0 |
| ATOM 2650 CB GLU A 172    | -23.846 | -27.310 | 37.151 | 1.00 | 58.16 | C0   |    |
| ANISOU 2650 CB GLU A 172  | 6770    | 9010    | 6320   | 1820 | -130  | 1860 | C0 |
| ATOM 2651 CG GLU A 172    | -24.468 | -27.995 | 38.355 | 1.00 | 59.52 | C0   |    |
| ANISOU 2651 CG GLU A 172  | 7080    | 9150    | 6380   | 1870 | -150  | 2020 | C0 |
| ATOM 2652 CD GLU A 172    | -23.492 | -28.822 | 39.176 | 1.00 | 62.56 | C0   |    |
| ANISOU 2652 CD GLU A 172  | 7420    | 9690    | 6660   | 2140 | -210  | 2210 | C0 |
| ATOM 2653 OE1 GLU A 172   | -22.342 | -29.003 | 38.727 | 1.00 | 64.27 | O0   |    |
| ANISOU 2653 OE1 GLU A 172 | 7490    | 10020   | 6910   | 2320 | -240  | 2220 | O0 |
| ATOM 2654 OE2 GLU A 172   | -23.881 | -29.278 | 40.264 | 1.00 | 63.97 | O0   |    |
| ANISOU 2654 OE2 GLU A 172 | 7690    | 9890    | 6720   | 2190 | -240  | 2350 | O0 |
| ATOM 2655 H GLU A 172     | -25.862 | -25.468 | 37.862 | 1.00 | 54.23 | H0   |    |
| ANISOU 2655 H GLU A 172   | 6330    | 8520    | 5750   | 1330 | -150  | 1650 | H0 |
| ATOM 2656 HA GLU A 172    | -24.320 | -26.011 | 35.615 | 1.00 | 54.79 | H0   |    |
| ANISOU 2656 HA GLU A 172  | 6300    | 8470    | 6040   | 1540 | -60   | 1590 | H0 |
| ATOM 2657 HB2 GLU A 172   | -23.525 | -27.996 | 36.528 | 1.00 | 58.74 | H0   |    |
| ANISOU 2657 HB2 GLU A 172 | 6890    | 8960    | 6470   | 1950 | -80   | 1900 | H0 |
| ATOM 2658 HB3 GLU A 172   | -23.071 | -26.790 | 37.448 | 1.00 | 58.81 | H0   |    |
| ANISOU 2658 HB3 GLU A 172 | 6670    | 9320    | 6350   | 1830 | -200  | 1830 | H0 |
| ATOM 2659 HG2 GLU A 172   | -24.865 | -27.315 | 38.939 | 1.00 | 58.89 | H0   |    |
| ANISOU 2659 HG2 GLU A 172 | 6970    | 9180    | 6230   | 1730 | -190  | 1970 | H0 |
| ATOM 2660 HG3 GLU A 172   | -25.191 | -28.583 | 38.051 | 1.00 | 59.08 | H0   |    |
| ANISOU 2660 HG3 GLU A 172 | 7210    | 8860    | 6380   | 1850 | -70   | 2060 | H0 |
| ATOM 2661 N ILE A 173     | -25.950 | -27.716 | 34.715 | 1.00 | 53.95 | N0   |    |
| ANISOU 2661 N ILE A 173   | 6620    | 7810    | 6070   | 1560 | 120   | 1690 | N0 |
| ATOM 2662 CA ILE A 173    | -27.037 | -28.505 | 34.067 | 1.00 | 53.34 | C0   |    |
| ANISOU 2662 CA ILE A 173  | 6770    | 7410    | 6080   | 1510 | 230   | 1700 | C0 |
| ATOM 2663 C ILE A 173     | -26.863 | -29.971 | 34.469 | 1.00 | 55.15 | C0   |    |
| ANISOU 2663 C ILE A 173   | 7160    | 7500    | 6300   | 1720 | 280   | 1880 | C0 |
| ATOM 2664 O ILE A 173     | -25.766 | -30.507 | 34.251 | 1.00 | 56.41 | O0   |    |
| ANISOU 2664 O ILE A 173   | 7260    | 7700    | 6480   | 1940 | 280   | 1950 | O0 |
| ATOM 2665 CB ILE A 173    | -27.004 | -28.323 | 32.537 | 1.00 | 52.23 | C0   |    |
| ANISOU 2665 CB ILE A 173  | 6640    | 7140    | 6070   | 1460 | 310   | 1560 | C0 |
| ATOM 2666 CG1 ILE A 173   | -27.343 | -26.882 | 32.146 | 1.00 | 50.50 | C0   |    |
| ANISOU 2666 CG1 ILE A 173 | 6310    | 7020    | 5860   | 1250 | 270   | 1390 | C0 |
| ATOM 2667 CG2 ILE A 173   | -27.911 | -29.338 | 31.855 | 1.00 | 52.06 | C0   |    |
| ANISOU 2667 CG2 ILE A 173 | 6850    | 6800    | 6130   | 1440 | 430   | 1580 | C0 |
| ATOM 2668 CD1 ILE A 173   | -27.252 | -26.595 | 30.664 | 1.00 | 49.72 | C0   |    |
| ANISOU 2668 CD1 ILE A 173 | 6200    | 6810    | 5870   | 1200 | 340   | 1270 | C0 |
| ATOM 2669 H ILE A 173     | -25.189 | -27.683 | 34.215 | 1.00 | 54.34 | H0   |    |
| ANISOU 2669 H ILE A 173   | 6580    | 7910    | 6160   | 1640 | 120   | 1660 | H0 |



|                            |         |         |        |      |       |      |    |
|----------------------------|---------|---------|--------|------|-------|------|----|
| ATOM 2670 HA ILE A 173     | -27.895 | -28.187 | 34.399 | 1.00 | 52.43 | H0   |    |
| ANISOU 2670 HA ILE A 173   | 6710    | 7270    | 5930   | 1370 | 230   | 1670 | H0 |
| ATOM 2671 HB ILE A 173     | -26.079 | -28.501 | 32.237 | 1.00 | 53.12 | H0   |    |
| ANISOU 2671 HB ILE A 173   | 6670    | 7300    | 6210   | 1590 | 300   | 1580 | H0 |
| ATOM 2672 HG12 ILE A 173   | -28.254 | -26.683 | 32.448 | 1.00 | 49.73 | H0   |    |
| ANISOU 2672 HG12 ILE A 173 | 6280    | 6880    | 5740   | 1130 | 280   | 1370 | H0 |
| ATOM 2673 HG13 ILE A 173   | -26.733 | -26.277 | 32.619 | 1.00 | 50.79 | H0   |    |
| ANISOU 2673 HG13 ILE A 173 | 6200    | 7250    | 5850   | 1250 | 210   | 1380 | H0 |
| ATOM 2674 HG21 ILE A 173   | -27.546 | -30.233 | 31.967 | 1.00 | 53.47 | H0   |    |
| ANISOU 2674 HG21 ILE A 173 | 7100    | 6900    | 6310   | 1590 | 460   | 1680 | H0 |
| ATOM 2675 HG22 ILE A 173   | -27.973 | -29.137 | 30.905 | 1.00 | 51.21 | H0   |    |
| ANISOU 2675 HG22 ILE A 173 | 6740    | 6620    | 6090   | 1390 | 470   | 1490 | H0 |
| ATOM 2676 HG23 ILE A 173   | -28.799 | -29.300 | 32.251 | 1.00 | 51.56 | H0   |    |
| ANISOU 2676 HG23 ILE A 173 | 6870    | 6690    | 6030   | 1330 | 430   | 1580 | H0 |
| ATOM 2677 HD11 ILE A 173   | -26.427 | -26.970 | 30.309 | 1.00 | 50.48 | H0   |    |
| ANISOU 2677 HD11 ILE A 173 | 6250    | 6920    | 6000   | 1320 | 350   | 1290 | H0 |
| ATOM 2678 HD12 ILE A 173   | -27.257 | -25.633 | 30.518 | 1.00 | 48.66 | H0   |    |
| ANISOU 2678 HD12 ILE A 173 | 5980    | 6770    | 5730   | 1090 | 310   | 1170 | H0 |
| ATOM 2679 HD13 ILE A 173   | -28.012 | -26.993 | 30.206 | 1.00 | 49.09 | H0   |    |
| ANISOU 2679 HD13 ILE A 173 | 6250    | 6560    | 5840   | 1140 | 400   | 1250 | H0 |
| ATOM 2680 N LEU A 174      | -27.911 | -30.582 | 35.025 | 1.00 | 55.26 | N0   |    |
| ANISOU 2680 N LEU A 174    | 7370    | 7360    | 6270   | 1660 | 330   | 1960 | N0 |
| ATOM 2681 CA LEU A 174     | -27.944 | -32.022 | 35.391 | 1.00 | 57.70 | C0   |    |
| ANISOU 2681 CA LEU A 174   | 7880    | 7470    | 6570   | 1830 | 400   | 2140 | C0 |
| ATOM 2682 C LEU A 174      | -28.492 | -32.835 | 34.212 | 1.00 | 57.39 | C0   |    |
| ANISOU 2682 C LEU A 174    | 8040    | 7110    | 6660   | 1800 | 540   | 2090 | C0 |
| ATOM 2683 O LEU A 174      | -28.027 | -33.968 | 34.019 | 1.00 | 59.09 | O0   |    |
| ANISOU 2683 O LEU A 174    | 8380    | 7160    | 6910   | 1990 | 620   | 2210 | O0 |
| ATOM 2684 CB LEU A 174     | -28.805 | -32.208 | 36.645 | 1.00 | 58.02 | C0   |    |
| ANISOU 2684 CB LEU A 174   | 8030    | 7520    | 6490   | 1750 | 390   | 2240 | C0 |
| ATOM 2685 CG LEU A 174     | -28.421 | -31.339 | 37.841 | 1.00 | 58.25 | C0   |    |
| ANISOU 2685 CG LEU A 174   | 7880    | 7870    | 6370   | 1740 | 250   | 2270 | C0 |
| ATOM 2686 CD1 LEU A 174    | -29.370 | -31.575 | 39.007 | 1.00 | 58.87 | C0   |    |
| ANISOU 2686 CD1 LEU A 174  | 8090    | 7940    | 6340   | 1650 | 260   | 2360 | C0 |
| ATOM 2687 CD2 LEU A 174    | -26.983 | -31.597 | 38.264 | 1.00 | 60.38 | C0   |    |
| ANISOU 2687 CD2 LEU A 174  | 8020    | 8340    | 6590   | 2010 | 170   | 2380 | C0 |
| ATOM 2688 H LEU A 174      | -28.685 | -30.142 | 35.217 | 1.00 | 54.33 | H0   |    |
| ANISOU 2688 H LEU A 174    | 7270    | 7240    | 6130   | 1500 | 320   | 1910 | H0 |
| ATOM 2689 HA LEU A 174     | -27.024 | -32.319 | 35.577 | 1.00 | 58.97 | H0   |    |
| ANISOU 2689 HA LEU A 174   | 7980    | 7720    | 6710   | 2020 | 370   | 2220 | H0 |
| ATOM 2690 HB2 LEU A 174    | -29.735 | -32.019 | 36.410 | 1.00 | 56.86 | H0   |    |
| ANISOU 2690 HB2 LEU A 174  | 7960    | 7280    | 6370   | 1580 | 430   | 2160 | H0 |
| ATOM 2691 HB3 LEU A 174    | -28.755 | -33.147 | 36.916 | 1.00 | 59.60 | H0   |    |
| ANISOU 2691 HB3 LEU A 174  | 8370    | 7600    | 6670   | 1870 | 440   | 2370 | H0 |
| ATOM 2692 HG LEU A 174     | -28.497 | -30.391 | 37.571 | 1.00 | 56.81 | H0   |    |
| ANISOU 2692 HG LEU A 174   | 7570    | 7800    | 6210   | 1620 | 210   | 2130 | H0 |
| ATOM 2693 HD11 LEU A 174   | -30.289 | -31.502 | 38.698 | 1.00 | 57.71 | H0   |    |
| ANISOU 2693 HD11 LEU A 174 | 8030    | 7660    | 6230   | 1490 | 320   | 2290 | H0 |
| ATOM 2694 HD12 LEU A 174   | -29.207 | -30.910 | 39.698 | 1.00 | 58.76 | H0   |    |
| ANISOU 2694 HD12 LEU A 174 | 7960    | 8130    | 6230   | 1620 | 170   | 2350 | H0 |
| ATOM 2695 HD13 LEU A 174   | -29.221 | -32.464 | 39.372 | 1.00 | 60.50 | H0   |    |
| ANISOU 2695 HD13 LEU A 174 | 8420    | 8060    | 6510   | 1790 | 290   | 2500 | H0 |
| ATOM 2696 HD21 LEU A 174   | -26.841 | -32.554 | 38.369 | 1.00 | 61.86 | H0   |    |
| ANISOU 2696 HD21 LEU A 174 | 8330    | 8400    | 6770   | 2160 | 220   | 2510 | H0 |

|             |                |         |         |        |      |           |    |
|-------------|----------------|---------|---------|--------|------|-----------|----|
| ATOM 2697   | HD22 LEU A 174 | -26.809 | -31.150 | 39.110 | 1.00 | 60.73     | H0 |
| ANISOU 2697 | HD22 LEU A 174 | 7960    | 8590    | 6520   | 2000 | 90 2410   | H0 |
| ATOM 2698   | HD23 LEU A 174 | -26.376 | -31.253 | 37.586 | 1.00 | 59.92     | H0 |
| ANISOU 2698 | HD23 LEU A 174 | 7840    | 8340    | 6590   | 2040 | 160 2300  | H0 |
| ATOM 2699   | N ASP A 175    | -29.450 | -32.284 | 33.460 | 1.00 | 55.75     | N0 |
| ANISOU 2699 | N ASP A 175    | 7850    | 6820    | 6510   | 1560 | 580 1930  | N0 |
| ATOM 2700   | CA ASP A 175   | -30.102 | -32.980 | 32.318 | 1.00 | 56.21     | C0 |
| ANISOU 2700 | CA ASP A 175   | 8090    | 6590    | 6680   | 1490 | 710 1870  | C0 |
| ATOM 2701   | C ASP A 175    | -30.918 | -31.980 | 31.493 | 1.00 | 53.77     | C0 |
| ANISOU 2701 | C ASP A 175    | 7710    | 6310    | 6410   | 1250 | 710 1670  | C0 |
| ATOM 2702   | O ASP A 175    | -31.403 | -30.985 | 32.068 | 1.00 | 52.48     | O0 |
| ANISOU 2702 | O ASP A 175    | 7440    | 6310    | 6190   | 1120 | 630 1620  | O0 |
| ATOM 2703   | CB ASP A 175   | -30.997 | -34.121 | 32.816 | 1.00 | 58.36     | C0 |
| ANISOU 2703 | CB ASP A 175   | 8620    | 6630    | 6920   | 1460 | 810 1970  | C0 |
| ATOM 2704   | CG ASP A 175   | -31.230 | -35.235 | 31.807 | 1.00 | 59.75     | C0 |
| ANISOU 2704 | CG ASP A 175   | 9000    | 6500    | 7200   | 1480 | 960 1950  | C0 |
| ATOM 2705   | OD1 ASP A 175  | -31.497 | -34.923 | 30.625 | 1.00 | 59.33     | O0 |
| ANISOU 2705 | OD1 ASP A 175  | 8920    | 6390    | 7230   | 1360 | 1000 1800 | O0 |
| ATOM 2706   | OD2 ASP A 175  | -31.152 | -36.409 | 32.216 | 1.00 | 62.63     | O0 |
| ANISOU 2706 | OD2 ASP A 175  | 9560    | 6680    | 7550   | 1600 | 1040 2100 | O0 |
| ATOM 2707   | H ASP A 175    | -29.770 | -31.444 | 33.610 | 1.00 | 54.62     | H0 |
| ANISOU 2707 | H ASP A 175    | 7620    | 6800    | 6340   | 1440 | 530 1860  | H0 |
| ATOM 2708   | HA ASP A 175   | -29.397 | -33.363 | 31.745 | 1.00 | 56.89     | H0 |
| ANISOU 2708 | HA ASP A 175   | 8170    | 6630    | 6820   | 1620 | 740 1870  | H0 |
| ATOM 2709   | HB2 ASP A 175  | -30.595 | -34.516 | 33.616 | 1.00 | 59.67     | H0 |
| ANISOU 2709 | HB2 ASP A 175  | 8810    | 6840    | 7030   | 1590 | 790 2100  | H0 |
| ATOM 2710   | HB3 ASP A 175  | -31.869 | -33.752 | 33.067 | 1.00 | 57.35     | H0 |
| ANISOU 2710 | HB3 ASP A 175  | 8500    | 6530    | 6760   | 1290 | 810 1920  | H0 |
| ATOM 2711   | N VAL A 176    | -31.045 | -32.246 | 30.191 | 1.00 | 53.69     | N0 |
| ANISOU 2711 | N VAL A 176    | 7760    | 6130    | 6500   | 1220 | 790 1570  | N0 |
| ATOM 2712   | CA VAL A 176   | -31.967 | -31.547 | 29.248 | 1.00 | 51.93     | C0 |
| ANISOU 2712 | CA VAL A 176   | 7520    | 5890    | 6320   | 1000 | 800 1400  | C0 |
| ATOM 2713   | C VAL A 176    | -32.708 | -32.626 | 28.454 | 1.00 | 53.44     | C0 |
| ANISOU 2713 | C VAL A 176    | 7930    | 5800    | 6570   | 930  | 940 1370  | C0 |
| ATOM 2714   | O VAL A 176    | -32.031 | -33.473 | 27.841 | 1.00 | 55.00     | O0 |
| ANISOU 2714 | O VAL A 176    | 8210    | 5860    | 6830   | 1070 | 1010 1400 | O0 |
| ATOM 2715   | CB VAL A 176   | -31.220 | -30.571 | 28.316 | 1.00 | 50.45     | C0 |
| ANISOU 2715 | CB VAL A 176   | 7160    | 5820    | 6180   | 1010 | 760 1280  | C0 |
| ATOM 2716   | CG1 VAL A 176  | -32.157 | -29.906 | 27.317 | 1.00 | 48.78     | C0 |
| ANISOU 2716 | CG1 VAL A 176  | 6950    | 5580    | 6000   | 810  | 780 1120  | C0 |
| ATOM 2717   | CG2 VAL A 176  | -30.460 | -29.511 | 29.095 | 1.00 | 49.98     | C0 |
| ANISOU 2717 | CG2 VAL A 176  | 6900    | 6030    | 6060   | 1050 | 640 1300  | C0 |
| ATOM 2718   | H VAL A 176    | -30.553 | -32.897 | 29.784 | 1.00 | 54.57     | H0 |
| ANISOU 2718 | H VAL A 176    | 7930    | 6140    | 6660   | 1330 | 840 1600  | H0 |
| ATOM 2719   | HA VAL A 176   | -32.614 | -31.043 | 29.768 | 1.00 | 51.29     | H0 |
| ANISOU 2719 | HA VAL A 176   | 7410    | 5880    | 6190   | 890  | 770 1380  | H0 |
| ATOM 2720   | HB VAL A 176   | -30.559 | -31.100 | 27.804 | 1.00 | 51.29     | H0 |
| ANISOU 2720 | HB VAL A 176   | 7290    | 5860    | 6340   | 1130 | 800 1300  | H0 |
| ATOM 2721   | HG11 VAL A 176 | -32.472 | -30.565 | 26.675 | 1.00 | 49.15     | H0 |
| ANISOU 2721 | HG11 VAL A 176 | 7110    | 5470    | 6090   | 790  | 850 1100  | H0 |
| ATOM 2722   | HG12 VAL A 176 | -31.682 | -29.199 | 26.846 | 1.00 | 48.07     | H0 |
| ANISOU 2722 | HG12 VAL A 176 | 6750    | 5580    | 5930   | 820  | 750 1060  | H0 |
| ATOM 2723   | HG13 VAL A 176 | -32.917 | -29.525 | 27.789 | 1.00 | 48.16     | H0 |
| ANISOU 2723 | HG13 VAL A 176 | 6870    | 5550    | 5880   | 700  | 750 1110  | H0 |

|                            |         |         |        |      |       |      |    |
|----------------------------|---------|---------|--------|------|-------|------|----|
| ATOM 2724 HG21 VAL A 176   | -31.081 | -29.010 | 29.652 | 1.00 | 49.37 | H0   |    |
| ANISOU 2724 HG21 VAL A 176 | 6800    | 6020    | 5930   | 950  | 600   | 1280 | H0 |
| ATOM 2725 HG22 VAL A 176   | -30.020 | -28.904 | 28.475 | 1.00 | 49.35 | H0   |    |
| ANISOU 2725 HG22 VAL A 176 | 6720    | 6020    | 6010   | 1040 | 630   | 1220 | H0 |
| ATOM 2726 HG23 VAL A 176   | -29.792 | -29.938 | 29.659 | 1.00 | 51.25 | H0   |    |
| ANISOU 2726 HG23 VAL A 176 | 7040    | 6230    | 6200   | 1190 | 620   | 1400 | H0 |
| ATOM 2727 N THR A 177      | -34.042 | -32.616 | 28.502 | 1.00 | 53.44 | N0   |    |
| ANISOU 2727 N THR A 177    | 8010    | 5740    | 6550   | 730  | 970   | 1310 | N0 |
| ATOM 2728 CA THR A 177     | -34.924 | -33.482 | 27.677 | 1.00 | 54.68 | C0   |    |
| ANISOU 2728 CA THR A 177   | 8350    | 5670    | 6750   | 600  | 1090  | 1240 | C0 |
| ATOM 2729 C THR A 177      | -35.766 | -32.571 | 26.778 | 1.00 | 53.57 | C0   |    |
| ANISOU 2729 C THR A 177    | 8120    | 5610    | 6630   | 410  | 1060  | 1060 | C0 |
| ATOM 2730 O THR A 177      | -36.149 | -31.477 | 27.238 | 1.00 | 51.12 | O0   |    |
| ANISOU 2730 O THR A 177    | 7670    | 5490    | 6270   | 330  | 970   | 1030 | O0 |
| ATOM 2731 CB THR A 177     | -35.774 | -34.417 | 28.548 | 1.00 | 56.26 | C0   |    |
| ANISOU 2731 CB THR A 177   | 8730    | 5740    | 6910   | 530  | 1160  | 1330 | C0 |
| ATOM 2732 OG1 THR A 177    | -36.609 | -33.616 | 29.381 | 1.00 | 55.57 | O0   |    |
| ANISOU 2732 OG1 THR A 177  | 8550    | 5820    | 6740   | 390  | 1090  | 1310 | O0 |
| ATOM 2733 CG2 THR A 177    | -34.943 | -35.343 | 29.410 | 1.00 | 58.38 | C0   |    |
| ANISOU 2733 CG2 THR A 177  | 9110    | 5920    | 7150   | 740  | 1190  | 1520 | C0 |
| ATOM 2734 H THR A 177      | -34.515 | -32.068 | 29.055 | 1.00 | 52.83 | H0   |    |
| ANISOU 2734 H THR A 177    | 7880    | 5770    | 6420   | 650  | 920   | 1300 | H0 |
| ATOM 2735 HA THR A 177     | -34.350 | -34.036 | 27.101 | 1.00 | 55.44 | H0   |    |
| ANISOU 2735 HA THR A 177   | 8500    | 5660    | 6900   | 700  | 1140  | 1250 | H0 |
| ATOM 2736 HB THR A 177     | -36.343 | -34.962 | 27.954 | 1.00 | 56.59 | H0   |    |
| ANISOU 2736 HB THR A 177   | 8890    | 5640    | 6980   | 430  | 1250  | 1270 | H0 |
| ATOM 2737 HG21 THR A 177   | -34.342 | -35.862 | 28.845 | 1.00 | 59.11 | H0   |    |
| ANISOU 2737 HG21 THR A 177 | 9250    | 5900    | 7300   | 850  | 1250  | 1530 | H0 |
| ATOM 2738 HG22 THR A 177   | -35.530 | -35.948 | 29.898 | 1.00 | 59.26 | H0   |    |
| ANISOU 2738 HG22 THR A 177 | 9350    | 5930    | 7240   | 680  | 1250  | 1570 | H0 |
| ATOM 2739 HG23 THR A 177   | -34.420 | -34.819 | 30.042 | 1.00 | 58.15 | H0   |    |
| ANISOU 2739 HG23 THR A 177 | 8960    | 6050    | 7080   | 830  | 1110  | 1580 | H0 |
| ATOM 2740 N GLN A 178      | -36.005 | -32.995 | 25.537 | 1.00 | 55.01 | N0   |    |
| ANISOU 2740 N GLN A 178    | 8380    | 5660    | 6870   | 350  | 1140  | 960  | N0 |
| ATOM 2741 CA GLN A 178     | -36.758 | -32.215 | 24.522 | 1.00 | 55.35 | C0   |    |
| ANISOU 2741 CA GLN A 178   | 8340    | 5770    | 6920   | 190  | 1120  | 800  | C0 |
| ATOM 2742 C GLN A 178      | -37.774 | -33.148 | 23.863 | 1.00 | 56.61 | C0   |    |
| ANISOU 2742 C GLN A 178    | 8670    | 5750    | 7090   | 30   | 1230  | 720  | C0 |
| ATOM 2743 O GLN A 178      | -37.337 | -34.065 | 23.147 | 1.00 | 58.38 | O0   |    |
| ANISOU 2743 O GLN A 178    | 9020    | 5800    | 7370   | 90   | 1330  | 710  | O0 |
| ATOM 2744 CB GLN A 178     | -35.792 | -31.588 | 23.512 | 1.00 | 55.34 | C0   |    |
| ANISOU 2744 CB GLN A 178   | 8240    | 5830    | 6960   | 290  | 1090  | 730  | C0 |
| ATOM 2745 CG GLN A 178     | -34.829 | -30.585 | 24.140 | 1.00 | 55.72 | C0   |    |
| ANISOU 2745 CG GLN A 178   | 8110    | 6070    | 6990   | 410  | 980   | 790  | C0 |
| ATOM 2746 CD GLN A 178     | -34.279 | -29.566 | 23.165 | 1.00 | 55.97 | C0   |    |
| ANISOU 2746 CD GLN A 178   | 8010    | 6210    | 7050   | 420  | 940   | 690  | C0 |
| ATOM 2747 OE1 GLN A 178    | -34.925 | -29.189 | 22.190 | 1.00 | 55.87 | O0   |    |
| ANISOU 2747 OE1 GLN A 178  | 8000    | 6190    | 7040   | 300  | 960   | 580  | O0 |
| ATOM 2748 NE2 GLN A 178    | -33.070 | -29.096 | 23.430 | 1.00 | 56.08 | N0   |    |
| ANISOU 2748 NE2 GLN A 178  | 7900    | 6330    | 7070   | 550  | 890   | 740  | N0 |
| ATOM 2749 H GLN A 178      | -35.713 | -33.803 | 25.233 | 1.00 | 56.13 | H0   |    |
| ANISOU 2749 H GLN A 178    | 8630    | 5650    | 7050   | 410  | 1220  | 980  | H0 |
| ATOM 2750 HA GLN A 178     | -37.243 | -31.494 | 24.982 | 1.00 | 54.33 | H0   |    |
| ANISOU 2750 HA GLN A 178   | 8130    | 5770    | 6740   | 120  | 1060  | 780  | H0 |

|                            |         |         |        |       |       |     |
|----------------------------|---------|---------|--------|-------|-------|-----|
| ATOM 2751 HB2 GLN A 178    | -35.276 | -32.305 | 23.087 | 1.00  | 56.33 | H0  |
| ANISOU 2751 HB2 GLN A 178  | 8440    | 5830    | 7130   | 370   | 1150  | 750 |
| ATOM 2752 HB3 GLN A 178    | -36.317 | -31.142 | 22.817 | 1.00  | 54.60 | H0  |
| ANISOU 2752 HB3 GLN A 178  | 8110    | 5770    | 6870   | 190   | 1080  | 630 |
| ATOM 2753 HG2 GLN A 178    | -35.293 | -30.110 | 24.862 | 1.00  | 55.27 | H0  |
| ANISOU 2753 HG2 GLN A 178  | 8000    | 6110    | 6890   | 350   | 930   | 810 |
| ATOM 2754 HG3 GLN A 178    | -34.079 | -31.073 | 24.542 | 1.00  | 56.75 | H0  |
| ANISOU 2754 HG3 GLN A 178  | 8260    | 6170    | 7130   | 540   | 1000  | 880 |
| ATOM 2755 HE21 GLN A 178   | -32.525 | -28.878 | 22.769 | 1.00  | 55.90 | H0  |
| ANISOU 2755 HE21 GLN A 178 | 7840    | 6320    | 7070   | 590   | 900   | 700 |
| ATOM 2756 HE22 GLN A 178   | -32.806 | -29.000 | 24.268 | 1.00  | 56.32 | H0  |
| ANISOU 2756 HE22 GLN A 178 | 7890    | 6430    | 7070   | 600   | 850   | 810 |
| ATOM 2757 N LYS A 179      | -39.069 | -32.934 | 24.127 | 1.00  | 56.35 | N0  |
| ANISOU 2757 N LYS A 179    | 8630    | 5780    | 7010   | -160  | 1220  | 660 |
| ATOM 2758 CA LYS A 179     | -40.180 | -33.761 | 23.582 | 1.00  | 56.87 | C0  |
| ANISOU 2758 CA LYS A 179   | 8830    | 5720    | 7070   | -350  | 1320  | 560 |
| ATOM 2759 C LYS A 179      | -41.153 | -32.875 | 22.794 | 1.00  | 54.65 | C0  |
| ANISOU 2759 C LYS A 179    | 8420    | 5590    | 6760   | -510  | 1270  | 410 |
| ATOM 2760 O LYS A 179      | -41.211 | -31.655 | 23.058 | 1.00  | 53.22 | O0  |
| ANISOU 2760 O LYS A 179    | 8070    | 5610    | 6540   | -480  | 1160  | 400 |
| ATOM 2761 CB LYS A 179     | -40.891 | -34.524 | 24.705 | 1.00  | 58.61 | C0  |
| ANISOU 2761 CB LYS A 179   | 9170    | 5860    | 7240   | -440  | 1390  | 650 |
| ATOM 2762 CG LYS A 179     | -41.885 | -33.720 | 25.536 | 1.00  | 58.43 | C0  |
| ANISOU 2762 CG LYS A 179   | 9020    | 6030    | 7150   | -560  | 1310  | 630 |
| ATOM 2763 CD LYS A 179     | -42.875 | -34.584 | 26.296 | 1.00  | 60.07 | C0  |
| ANISOU 2763 CD LYS A 179   | 9370    | 6150    | 7310   | -730  | 1410  | 660 |
| ATOM 2764 CE LYS A 179     | -43.944 | -35.186 | 25.406 | 1.00  | 61.42 | C0  |
| ANISOU 2764 CE LYS A 179   | 9610    | 6240    | 7480   | -950  | 1500  | 510 |
| ATOM 2765 NZ LYS A 179     | -44.949 | -35.951 | 26.185 | 1.00  | 63.34 | N0  |
| ANISOU 2765 NZ LYS A 179   | 9970    | 6420    | 7680   | -1130 | 1590  | 530 |
| ATOM 2766 H LYS A 179      | -39.352 | -32.257 | 24.667 | 1.00  | 55.49 | H0  |
| ANISOU 2766 H LYS A 179    | 8430    | 5800    | 6860   | -180  | 1160  | 670 |
| ATOM 2767 HA LYS A 179     | -39.794 | -34.419 | 22.960 | 1.00  | 57.62 | H0  |
| ANISOU 2767 HA LYS A 179   | 9020    | 5670    | 7200   | -310  | 1390  | 550 |
| ATOM 2768 HB2 LYS A 179    | -41.364 | -35.283 | 24.306 | 1.00  | 59.62 | H0  |
| ANISOU 2768 HB2 LYS A 179  | 9410    | 5860    | 7380   | -540  | 1480  | 600 |
| ATOM 2769 HB3 LYS A 179    | -40.209 | -34.885 | 25.309 | 1.00  | 59.35 | H0  |
| ANISOU 2769 HB3 LYS A 179  | 9320    | 5890    | 7350   | -310  | 1400  | 760 |
| ATOM 2770 HG2 LYS A 179    | -41.387 | -33.168 | 26.176 | 1.00  | 57.77 | H0  |
| ANISOU 2770 HG2 LYS A 179  | 8860    | 6040    | 7050   | -460  | 1240  | 710 |
| ATOM 2771 HG3 LYS A 179    | -42.382 | -33.117 | 24.944 | 1.00  | 57.40 | H0  |
| ANISOU 2771 HG3 LYS A 179  | 8800    | 6000    | 7010   | -640  | 1280  | 530 |
| ATOM 2772 HD2 LYS A 179    | -42.389 | -35.309 | 26.743 | 1.00  | 61.29 | H0  |
| ANISOU 2772 HD2 LYS A 179  | 9640    | 6170    | 7480   | -650  | 1460  | 760 |
| ATOM 2773 HD3 LYS A 179    | -43.308 | -34.040 | 26.988 | 1.00  | 59.65 | H0  |
| ANISOU 2773 HD3 LYS A 179  | 9230    | 6220    | 7210   | -770  | 1360  | 680 |
| ATOM 2774 HE2 LYS A 179    | -44.398 | -34.475 | 24.916 | 1.00  | 60.33 | H0  |
| ANISOU 2774 HE2 LYS A 179  | 9350    | 6240    | 7330   | -1010 | 1440  | 410 |
| ATOM 2775 HE3 LYS A 179    | -43.530 | -35.783 | 24.756 | 1.00  | 62.02 | H0  |
| ANISOU 2775 HE3 LYS A 179  | 9790    | 6170    | 7600   | -920  | 1560  | 490 |
| ATOM 2776 HZ1 LYS A 179    | -44.543 | -36.628 | 26.631 | 1.00  | 64.25 | H0  |
| ANISOU 2776 HZ1 LYS A 179  | 10220   | 6390    | 7800   | -1070 | 1660  | 630 |
| ATOM 2777 HZ2 LYS A 179    | -45.574 | -36.296 | 25.626 | 1.00  | 63.69 | H0  |
| ANISOU 2777 HZ2 LYS A 179  | 10050   | 6430    | 7720   | -1270 | 1650  | 430 |

|                           |         |         |        |       |           |    |
|---------------------------|---------|---------|--------|-------|-----------|----|
| ATOM 2778 HZ3 LYS A 179   | -45.356 | -35.403 | 26.783 | 1.00  | 62.64     | H0 |
| ANISOU 2778 HZ3 LYS A 179 | 9790    | 6460    | 7550   | -1160 | 1540 540  | H0 |
| ATOM 2779 N LYS A 180     | -41.893 | -33.494 | 21.871 | 1.00  | 53.73     | N0 |
| ANISOU 2779 N LYS A 180   | 8390    | 5390    | 6640   | -660  | 1350 290  | N0 |
| ATOM 2780 CA LYS A 180    | -42.882 | -32.847 | 20.972 | 1.00  | 52.16     | C0 |
| ANISOU 2780 CA LYS A 180  | 8080    | 5340    | 6400   | -810  | 1310 140  | C0 |
| ATOM 2781 C LYS A 180     | -44.283 | -33.001 | 21.577 | 1.00  | 50.86     | C0 |
| ANISOU 2781 C LYS A 180   | 7910    | 5240    | 6170   | -1010 | 1320 100  | C0 |
| ATOM 2782 O LYS A 180     | -44.563 | -34.070 | 22.131 | 1.00  | 52.14     | O0 |
| ANISOU 2782 O LYS A 180   | 8220    | 5250    | 6340   | -1090 | 1420 140  | O0 |
| ATOM 2783 CB LYS A 180    | -42.815 | -33.503 | 19.590 | 1.00  | 53.86     | C0 |
| ANISOU 2783 CB LYS A 180  | 8390    | 5430    | 6640   | -860  | 1380 20   | C0 |
| ATOM 2784 CG LYS A 180    | -43.817 | -32.996 | 18.562 | 1.00  | 54.54     | C0 |
| ANISOU 2784 CG LYS A 180  | 8380    | 5670    | 6670   | -1020 | 1350 -140 | C0 |
| ATOM 2785 CD LYS A 180    | -44.135 | -34.024 | 17.496 | 1.00  | 57.15     | C0 |
| ANISOU 2785 CD LYS A 180  | 8850    | 5860    | 7000   | -1150 | 1450 -260 | C0 |
| ATOM 2786 CE LYS A 180    | -44.842 | -33.444 | 16.290 | 1.00  | 57.39     | C0 |
| ANISOU 2786 CE LYS A 180  | 8770    | 6060    | 6970   | -1260 | 1400 -410 | C0 |
| ATOM 2787 NZ LYS A 180    | -45.221 | -34.501 | 15.321 | 1.00  | 59.96     | N0 |
| ANISOU 2787 NZ LYS A 180  | 9230    | 6260    | 7280   | -1420 | 1510 -550 | N0 |
| ATOM 2788 H LYS A 180     | -41.833 | -34.394 | 21.738 | 1.00  | 55.09     | H0 |
| ANISOU 2788 H LYS A 180   | 8690    | 5410    | 6830   | -680  | 1440 300  | H0 |
| ATOM 2789 HA LYS A 180    | -42.664 | -31.890 | 20.891 | 1.00  | 50.94     | H0 |
| ANISOU 2789 HA LYS A 180  | 7800    | 5310    | 6240   | -750  | 1220 140  | H0 |
| ATOM 2790 HB2 LYS A 180   | -41.912 | -33.371 | 19.231 | 1.00  | 53.60     | H0 |
| ANISOU 2790 HB2 LYS A 180 | 8360    | 5360    | 6650   | -730  | 1370 50   | H0 |
| ATOM 2791 HB3 LYS A 180   | -42.950 | -34.468 | 19.702 | 1.00  | 55.18     | H0 |
| ANISOU 2791 HB3 LYS A 180 | 8700    | 5450    | 6820   | -920  | 1480 30   | H0 |
| ATOM 2792 HG2 LYS A 180   | -44.646 | -32.743 | 19.018 | 1.00  | 54.41     | H0 |
| ANISOU 2792 HG2 LYS A 180 | 8310    | 5750    | 6610   | -1110 | 1320 -150 | H0 |
| ATOM 2793 HG3 LYS A 180   | -43.452 | -32.192 | 18.134 | 1.00  | 53.50     | H0 |
| ANISOU 2793 HG3 LYS A 180 | 8160    | 5630    | 6540   | -940  | 1280 -150 | H0 |
| ATOM 2794 HD2 LYS A 180   | -43.300 | -34.444 | 17.200 | 1.00  | 57.40     | H0 |
| ANISOU 2794 HD2 LYS A 180 | 8970    | 5760    | 7080   | -1050 | 1500 -230 | H0 |
| ATOM 2795 HD3 LYS A 180   | -44.700 | -34.723 | 17.887 | 1.00  | 58.07     | H0 |
| ANISOU 2795 HD3 LYS A 180 | 9050    | 5910    | 7110   | -1270 | 1520 -270 | H0 |
| ATOM 2796 HE2 LYS A 180   | -45.647 | -32.973 | 16.578 | 1.00  | 57.08     | H0 |
| ANISOU 2796 HE2 LYS A 180 | 8640    | 6160    | 6890   | -1340 | 1350 -440 | H0 |
| ATOM 2797 HE3 LYS A 180   | -44.258 | -32.802 | 15.846 | 1.00  | 56.52     | H0 |
| ANISOU 2797 HE3 LYS A 180 | 8600    | 6000    | 6870   | -1150 | 1350 -400 | H0 |
| ATOM 2798 HZ1 LYS A 180   | -44.478 | -34.937 | 15.036 | 1.00  | 60.04     | H0 |
| ANISOU 2798 HZ1 LYS A 180 | 9340    | 6140    | 7340   | -1340 | 1570 -530 | H0 |
| ATOM 2799 HZ2 LYS A 180   | -45.638 | -34.129 | 14.607 | 1.00  | 59.44     | H0 |
| ANISOU 2799 HZ2 LYS A 180 | 9100    | 6320    | 7170   | -1470 | 1470 -640 | H0 |
| ATOM 2800 HZ3 LYS A 180   | -45.780 | -35.095 | 15.717 | 1.00  | 60.58     | H0 |
| ANISOU 2800 HZ3 LYS A 180 | 9370    | 6290    | 7350   | -1530 | 1570 -560 | H0 |
| ATOM 2801 N ASN A 181     | -45.124 | -31.971 | 21.452 | 1.00  | 48.13     | N0 |
| ANISOU 2801 N ASN A 181   | 7400    | 5110    | 5780   | -1080 | 1230 20   | N0 |
| ATOM 2802 CA ASN A 181    | -46.562 | -32.004 | 21.826 | 1.00  | 47.34     | C0 |
| ANISOU 2802 CA ASN A 181  | 7250    | 5130    | 5610   | -1280 | 1240 -50  | C0 |
| ATOM 2803 C ASN A 181     | -47.405 | -31.502 | 20.651 | 1.00  | 46.19     | C0 |
| ANISOU 2803 C ASN A 181   | 6990    | 5140    | 5420   | -1380 | 1200 -210 | C0 |
| ATOM 2804 O ASN A 181     | -46.954 | -30.576 | 19.942 | 1.00  | 44.10     | O0 |
| ANISOU 2804 O ASN A 181   | 6630    | 4960    | 5160   | -1270 | 1120 -230 | O0 |

|                            |         |         |        |       |       |      |    |
|----------------------------|---------|---------|--------|-------|-------|------|----|
| ATOM 2805 CB ASN A 181     | -46.857 | -31.170 | 23.073 | 1.00  | 46.62 |      | C0 |
| ANISOU 2805 CB ASN A 181   | 7040    | 5190    | 5480   | -1250 | 1170  | 20   | C0 |
| ATOM 2806 CG ASN A 181     | -46.132 | -31.678 | 24.301 | 1.00  | 47.19 |      | C0 |
| ANISOU 2806 CG ASN A 181   | 7220    | 5140    | 5570   | -1150 | 1210  | 180  | C0 |
| ATOM 2807 OD1 ASN A 181    | -46.434 | -32.761 | 24.808 | 1.00  | 48.41 |      | O0 |
| ANISOU 2807 OD1 ASN A 181  | 7520    | 5150    | 5720   | -1250 | 1310  | 220  | O0 |
| ATOM 2808 ND2 ASN A 181    | -45.171 | -30.905 | 24.780 | 1.00  | 46.03 |      | N0 |
| ANISOU 2808 ND2 ASN A 181  | 7000    | 5040    | 5440   | -970  | 1120  | 270  | N0 |
| ATOM 2809 H ASN A 181      | -44.856 | -31.165 | 21.122 | 1.00  | 47.20 |      | H0 |
| ANISOU 2809 H ASN A 181    | 7180    | 5090    | 5660   | -1010 | 1160  | 10   | H0 |
| ATOM 2810 HA ASN A 181     | -46.813 | -32.937 | 22.020 | 1.00  | 48.66 |      | H0 |
| ANISOU 2810 HA ASN A 181   | 7540    | 5170    | 5780   | -1370 | 1330  | -50  | H0 |
| ATOM 2811 HB2 ASN A 181    | -46.594 | -30.243 | 22.904 | 1.00  | 45.48 |      | H0 |
| ANISOU 2811 HB2 ASN A 181  | 6790    | 5150    | 5340   | -1150 | 1090  | 20   | H0 |
| ATOM 2812 HB3 ASN A 181    | -47.821 | -31.185 | 23.243 | 1.00  | 47.00 |      | H0 |
| ANISOU 2812 HB3 ASN A 181  | 7050    | 5320    | 5490   | -1380 | 1180  | -30  | H0 |
| ATOM 2813 HD21 ASN A 181   | -44.865 | -31.036 | 25.599 | 1.00  | 46.30 |      | H0 |
| ANISOU 2813 HD21 ASN A 181 | 7070    | 5050    | 5470   | -920  | 1130  | 360  | H0 |
| ATOM 2814 HD22 ASN A 181   | -44.831 | -30.258 | 24.281 | 1.00  | 45.18 |      | H0 |
| ANISOU 2814 HD22 ASN A 181 | 6820    | 5000    | 5350   | -910  | 1070  | 250  | H0 |
| ATOM 2815 N SER A 182      | -48.582 | -32.111 | 20.475 | 1.00  | 46.22 |      | N0 |
| ANISOU 2815 N SER A 182    | 7010    | 5170    | 5380   | -1600 | 1260  | -310 | N0 |
| ATOM 2816 CA SER A 182     | -49.661 | -31.691 | 19.548 | 1.00  | 45.65 |      | C0 |
| ANISOU 2816 CA SER A 182   | 6810    | 5300    | 5240   | -1730 | 1220  | -470 | C0 |
| ATOM 2817 C SER A 182      | -50.908 | -31.402 | 20.383 | 1.00  | 45.51 |      | C0 |
| ANISOU 2817 C SER A 182    | 6670    | 5470    | 5150   | -1860 | 1200  | -500 | C0 |
| ATOM 2818 O SER A 182      | -51.433 | -32.355 | 20.995 | 1.00  | 47.21 |      | O0 |
| ANISOU 2818 O SER A 182    | 6980    | 5600    | 5360   | -2020 | 1300  | -500 | O0 |
| ATOM 2819 CB SER A 182     | -49.923 | -32.748 | 18.503 | 1.00  | 46.83 |      | C0 |
| ANISOU 2819 CB SER A 182   | 7070    | 5350    | 5380   | -1890 | 1310  | -590 | C0 |
| ATOM 2820 OG SER A 182     | -50.819 | -32.266 | 17.515 | 1.00  | 46.78 |      | O0 |
| ANISOU 2820 OG SER A 182   | 6920    | 5550    | 5300   | -1980 | 1250  | -740 | O0 |
| ATOM 2821 H SER A 182      | -48.811 | -32.863 | 20.935 | 1.00  | 47.35 |      | H0 |
| ANISOU 2821 H SER A 182    | 7250    | 5220    | 5520   | -1690 | 1340  | -300 | H0 |
| ATOM 2822 HA SER A 182     | -49.380 | -30.853 | 19.094 | 1.00  | 44.58 |      | H0 |
| ANISOU 2822 HA SER A 182   | 6580    | 5260    | 5100   | -1620 | 1130  | -470 | H0 |
| ATOM 2823 HB2 SER A 182    | -49.073 | -33.006 | 18.079 | 1.00  | 46.76 |      | H0 |
| ANISOU 2823 HB2 SER A 182  | 7150    | 5200    | 5420   | -1800 | 1330  | -560 | H0 |
| ATOM 2824 HB3 SER A 182    | -50.306 | -33.547 | 18.933 | 1.00  | 48.03 |      | H0 |
| ANISOU 2824 HB3 SER A 182  | 7310    | 5410    | 5530   | -2010 | 1390  | -600 | H0 |
| ATOM 2825 N VAL A 183      | -51.339 | -30.140 | 20.438 | 1.00  | 44.17 |      | N0 |
| ANISOU 2825 N VAL A 183    | 6310    | 5530    | 4940   | -1780 | 1080  | -510 | N0 |
| ATOM 2826 CA VAL A 183     | -52.424 | -29.683 | 21.357 | 1.00  | 44.42 |      | C0 |
| ANISOU 2826 CA VAL A 183   | 6210    | 5750    | 4920   | -1860 | 1060  | -520 | C0 |
| ATOM 2827 C VAL A 183      | -53.486 | -28.932 | 20.549 | 1.00  | 44.39 |      | C0 |
| ANISOU 2827 C VAL A 183    | 6020    | 6010    | 4840   | -1900 | 980   | -650 | C0 |
| ATOM 2828 O VAL A 183      | -53.114 | -28.064 | 19.743 | 1.00  | 43.02 |      | O0 |
| ANISOU 2828 O VAL A 183    | 5780    | 5900    | 4660   | -1760 | 890   | -660 | O0 |
| ATOM 2829 CB VAL A 183     | -51.878 | -28.819 | 22.514 | 1.00  | 43.31 |      | C0 |
| ANISOU 2829 CB VAL A 183   | 6030    | 5630    | 4800   | -1690 | 1000  | -390 | C0 |
| ATOM 2830 CG1 VAL A 183    | -52.949 | -28.535 | 23.569 | 1.00  | 43.82 |      | C0 |
| ANISOU 2830 CG1 VAL A 183  | 5990    | 5860    | 4810   | -1780 | 1000  | -400 | C0 |
| ATOM 2831 CG2 VAL A 183    | -50.653 | -29.450 | 23.162 | 1.00  | 43.28 |      | C0 |
| ANISOU 2831 CG2 VAL A 183  | 6200    | 5390    | 4860   | -1600 | 1050  | -250 | C0 |

|                            |         |         |        |       |       |       |    |
|----------------------------|---------|---------|--------|-------|-------|-------|----|
| ATOM 2832 H VAL A 183      | -50.996 | -29.477 | 19.917 | 1.00  | 43.39 | H0    |    |
| ANISOU 2832 H VAL A 183    | 6160    | 5480    | 4850   | -1670 | 1020  | -510  | H0 |
| ATOM 2833 HA VAL A 183     | -52.839 | -30.469 | 21.743 | 1.00  | 45.51 | H0    |    |
| ANISOU 2833 HA VAL A 183   | 6410    | 5830    | 5050   | -1990 | 1140  | -540  | H0 |
| ATOM 2834 HB VAL A 183     | -51.600 | -27.953 | 22.128 | 1.00  | 42.32 | H0    |    |
| ANISOU 2834 HB VAL A 183   | 5830    | 5570    | 4680   | -1570 | 930   | -390  | H0 |
| ATOM 2835 HG11 VAL A 183   | -53.638 | -27.963 | 23.189 | 1.00  | 43.74 | H0    |    |
| ANISOU 2835 HG11 VAL A 183 | 5850    | 6020    | 4760   | -1790 | 950   | -480  | H0 |
| ATOM 2836 HG12 VAL A 183   | -52.543 | -28.088 | 24.333 | 1.00  | 43.13 | H0    |    |
| ANISOU 2836 HG12 VAL A 183 | 5890    | 5760    | 4730   | -1680 | 980   | -320  | H0 |
| ATOM 2837 HG13 VAL A 183   | -53.349 | -29.373 | 23.860 | 1.00  | 44.91 | H0    |    |
| ANISOU 2837 HG13 VAL A 183 | 6190    | 5940    | 4930   | -1920 | 1080  | -420  | H0 |
| ATOM 2838 HG21 VAL A 183   | -50.830 | -30.388 | 23.348 | 1.00  | 44.37 | H0    |    |
| ANISOU 2838 HG21 VAL A 183 | 6440    | 5420    | 5000   | -1710 | 1140  | -250  | H0 |
| ATOM 2839 HG22 VAL A 183   | -50.450 | -28.988 | 23.994 | 1.00  | 42.76 | H0    |    |
| ANISOU 2839 HG22 VAL A 183 | 6100    | 5350    | 4790   | -1530 | 1020  | -180  | H0 |
| ATOM 2840 HG23 VAL A 183   | -49.892 | -29.378 | 22.560 | 1.00  | 42.77 | H0    |    |
| ANISOU 2840 HG23 VAL A 183 | 6170    | 5250    | 4830   | -1510 | 1040  | -240  | H0 |
| ATOM 2841 N THR A 184      | -54.756 | -29.282 | 20.770 | 1.00  | 46.14 | N0    |    |
| ANISOU 2841 N THR A 184    | 6150    | 6380    | 5000   | -2090 | 1010  | -750  | N0 |
| ATOM 2842 CA THR A 184     | -55.958 | -28.531 | 20.323 | 1.00  | 47.25 | C0    |    |
| ANISOU 2842 CA THR A 184   | 6080    | 6830    | 5050   | -2130 | 940   | -860  | C0 |
| ATOM 2843 C THR A 184      | -56.377 | -27.586 | 21.457 | 1.00  | 47.16 | C0    |    |
| ANISOU 2843 C THR A 184    | 5940    | 6960    | 5020   | -2040 | 890   | -800  | C0 |
| ATOM 2844 O THR A 184      | -56.522 | -28.061 | 22.603 | 1.00  | 47.55 | O0    |    |
| ANISOU 2844 O THR A 184    | 6040    | 6950    | 5080   | -2130 | 960   | -750  | O0 |
| ATOM 2845 CB THR A 184     | -57.066 | -29.499 | 19.884 | 1.00  | 49.76 | C0    |    |
| ANISOU 2845 CB THR A 184   | 6360    | 7240    | 5300   | -2400 | 1010  | -1010 | C0 |
| ATOM 2846 OG1 THR A 184    | -56.681 | -30.013 | 18.606 | 1.00  | 50.13 | O0    |    |
| ANISOU 2846 OG1 THR A 184  | 6500    | 7200    | 5350   | -2440 | 1020  | -1080 | O0 |
| ATOM 2847 CG2 THR A 184    | -58.433 | -28.858 | 19.789 | 1.00  | 50.72 | C0    |    |
| ANISOU 2847 CG2 THR A 184  | 6240    | 7700    | 5330   | -2460 | 940   | -1120 | C0 |
| ATOM 2848 H THR A 184      | -54.978 | -30.034 | 21.234 | 1.00  | 47.12 | H0    |    |
| ANISOU 2848 H THR A 184    | 6350    | 6430    | 5120   | -2220 | 1090  | -750  | H0 |
| ATOM 2849 HA THR A 184     | -55.700 | -27.987 | 19.545 | 1.00  | 46.71 | H0    |    |
| ANISOU 2849 HA THR A 184   | 5970    | 6800    | 4970   | -2030 | 870   | -870  | H0 |
| ATOM 2850 HB THR A 184     | -57.106 | -30.244 | 20.531 | 1.00  | 50.40 | H0    |    |
| ANISOU 2850 HB THR A 184   | 6540    | 7210    | 5400   | -2520 | 1100  | -990  | H0 |
| ATOM 2851 HG21 THR A 184   | -58.824 | -28.789 | 20.679 | 1.00  | 50.84 | H0    |    |
| ANISOU 2851 HG21 THR A 184 | 6210    | 7770    | 5340   | -2500 | 970   | -1090 | H0 |
| ATOM 2852 HG22 THR A 184   | -59.010 | -29.404 | 19.225 | 1.00  | 51.91 | H0    |    |
| ANISOU 2852 HG22 THR A 184 | 6360    | 7930    | 5430   | -2620 | 970   | -1230 | H0 |
| ATOM 2853 HG23 THR A 184   | -58.351 | -27.969 | 19.401 | 1.00  | 49.83 | H0    |    |
| ANISOU 2853 HG23 THR A 184 | 6040    | 7690    | 5200   | -2310 | 850   | -1110 | H0 |
| ATOM 2854 N TYR A 185      | -56.525 | -26.295 | 21.145 | 1.00  | 46.81 | N0    |    |
| ANISOU 2854 N TYR A 185    | 5750    | 7090    | 4950   | -1870 | 780   | -800  | N0 |
| ATOM 2855 CA TYR A 185     | -56.906 | -25.209 | 22.085 | 1.00  | 45.93 | C0    |    |
| ANISOU 2855 CA TYR A 185   | 5510    | 7120    | 4820   | -1750 | 730   | -760  | C0 |
| ATOM 2856 C TYR A 185      | -58.306 | -24.701 | 21.728 | 1.00  | 48.06 | C0    |    |
| ANISOU 2856 C TYR A 185    | 5560    | 7700    | 5000   | -1790 | 680   | -880  | C0 |
| ATOM 2857 O TYR A 185      | -58.755 | -24.905 | 20.579 | 1.00  | 48.92 | O0    |    |
| ANISOU 2857 O TYR A 185    | 5610    | 7920    | 5060   | -1850 | 650   | -970  | O0 |
| ATOM 2858 CB TYR A 185     | -55.880 | -24.074 | 22.041 | 1.00  | 43.74 | C0    |    |
| ANISOU 2858 CB TYR A 185   | 5260    | 6780    | 4580   | -1510 | 650   | -660  | C0 |

|                           |         |         |        |       |       |       |    |
|---------------------------|---------|---------|--------|-------|-------|-------|----|
| ATOM 2859 CG TYR A 185    | -54.486 | -24.472 | 22.452 | 1.00  | 42.82 | C0    |    |
| ANISOU 2859 CG TYR A 185  | 5320    | 6390    | 4550   | -1450 | 690   | -550  | C0 |
| ATOM 2860 CD1 TYR A 185   | -54.102 | -24.479 | 23.784 | 1.00  | 42.45 | C0    |    |
| ANISOU 2860 CD1 TYR A 185 | 5320    | 6270    | 4530   | -1430 | 720   | -450  | C0 |
| ATOM 2861 CD2 TYR A 185   | -53.548 | -24.855 | 21.507 | 1.00  | 42.37 | C0    |    |
| ANISOU 2861 CD2 TYR A 185 | 5380    | 6180    | 4540   | -1410 | 700   | -530  | C0 |
| ATOM 2862 CE1 TYR A 185   | -52.820 | -24.851 | 24.167 | 1.00  | 42.06 | C0    |    |
| ANISOU 2862 CE1 TYR A 185 | 5420    | 6010    | 4550   | -1360 | 750   | -340  | C0 |
| ATOM 2863 CE2 TYR A 185   | -52.262 | -25.225 | 21.871 | 1.00  | 42.01 | C0    |    |
| ANISOU 2863 CE2 TYR A 185 | 5480    | 5910    | 4570   | -1340 | 730   | -430  | C0 |
| ATOM 2864 CZ TYR A 185    | -51.893 | -25.219 | 23.206 | 1.00  | 41.95 | C0    |    |
| ANISOU 2864 CZ TYR A 185  | 5510    | 5850    | 4580   | -1320 | 750   | -330  | C0 |
| ATOM 2865 OH TYR A 185    | -50.627 | -25.591 | 23.559 | 1.00  | 41.54 | O0    |    |
| ANISOU 2865 OH TYR A 185  | 5590    | 5600    | 4590   | -1240 | 780   | -230  | O0 |
| ATOM 2866 H TYR A 185     | -56.398 | -25.980 | 20.299 | 1.00  | 46.37 | H0    |    |
| ANISOU 2866 H TYR A 185   | 5670    | 7070    | 4880   | -1810 | 730   | -830  | H0 |
| ATOM 2867 HA TYR A 185    | -56.931 | -25.577 | 23.005 | 1.00  | 46.31 | H0    |    |
| ANISOU 2867 HA TYR A 185  | 5600    | 7120    | 4880   | -1820 | 780   | -720  | H0 |
| ATOM 2868 HB2 TYR A 185   | -55.851 | -23.720 | 21.128 | 1.00  | 43.70 | H0    |    |
| ANISOU 2868 HB2 TYR A 185 | 5220    | 6820    | 4560   | -1440 | 610   | -690  | H0 |
| ATOM 2869 HB3 TYR A 185   | -56.190 | -23.355 | 22.630 | 1.00  | 43.60 | H0    |    |
| ANISOU 2869 HB3 TYR A 185 | 5160    | 6860    | 4550   | -1440 | 630   | -640  | H0 |
| ATOM 2870 HD1 TYR A 185   | -54.725 | -24.226 | 24.446 | 1.00  | 42.81 | H0    |    |
| ANISOU 2870 HD1 TYR A 185 | 5300    | 6420    | 4550   | -1460 | 730   | -460  | H0 |
| ATOM 2871 HD2 TYR A 185   | -53.786 | -24.858 | 20.595 | 1.00  | 42.75 | H0    |    |
| ANISOU 2871 HD2 TYR A 185 | 5400    | 6280    | 4560   | -1430 | 680   | -600  | H0 |
| ATOM 2872 HE1 TYR A 185   | -52.577 | -24.844 | 25.078 | 1.00  | 41.91 | H0    |    |
| ANISOU 2872 HE1 TYR A 185 | 5430    | 5950    | 4540   | -1350 | 760   | -280  | H0 |
| ATOM 2873 HE2 TYR A 185   | -51.638 | -25.478 | 21.211 | 1.00  | 41.81 | H0    |    |
| ANISOU 2873 HE2 TYR A 185 | 5530    | 5790    | 4570   | -1310 | 740   | -420  | H0 |
| ATOM 2874 N SER A 186     | -58.956 | -24.044 | 22.693 | 1.00  | 49.59 | N0    |    |
| ANISOU 2874 N SER A 186   | 5630    | 8050    | 5160   | -1750 | 670   | -870  | N0 |
| ATOM 2875 CA SER A 186    | -60.338 | -23.498 | 22.623 | 1.00  | 51.89 | C0    |    |
| ANISOU 2875 CA SER A 186  | 5690    | 8660    | 5370   | -1770 | 630   | -970  | C0 |
| ATOM 2876 C SER A 186     | -60.491 | -22.495 | 21.469 | 1.00  | 52.75 | C0    |    |
| ANISOU 2876 C SER A 186   | 5700    | 8910    | 5430   | -1590 | 520   | -1000 | C0 |
| ATOM 2877 O SER A 186     | -61.605 | -22.419 | 20.927 | 1.00  | 54.52 | O0    |    |
| ANISOU 2877 O SER A 186   | 5740    | 9400    | 5570   | -1630 | 490   | -1110 | O0 |
| ATOM 2878 CB SER A 186    | -60.732 | -22.875 | 23.947 | 1.00  | 52.02 | C0    |    |
| ANISOU 2878 CB SER A 186  | 5630    | 8760    | 5380   | -1720 | 650   | -930  | C0 |
| ATOM 2879 OG SER A 186    | -59.696 | -22.034 | 24.449 | 1.00  | 50.90 | O0    |    |
| ANISOU 2879 OG SER A 186  | 5590    | 8460    | 5290   | -1520 | 620   | -810  | O0 |
| ATOM 2880 H SER A 186     | -58.572 | -23.879 | 23.503 | 1.00  | 48.92 | H0    |    |
| ANISOU 2880 H SER A 186   | 5600    | 7880    | 5110   | -1710 | 690   | -790  | H0 |
| ATOM 2881 HA SER A 186    | -60.953 | -24.260 | 22.447 | 1.00  | 53.13 | H0    |    |
| ANISOU 2881 HA SER A 186  | 5820    | 8880    | 5490   | -1950 | 680   | -1050 | H0 |
| ATOM 2882 HB2 SER A 186   | -61.553 | -22.346 | 23.828 | 1.00  | 52.74 | H0    |    |
| ANISOU 2882 HB2 SER A 186 | 5570    | 9060    | 5410   | -1680 | 610   | -990  | H0 |
| ATOM 2883 HB3 SER A 186   | -60.919 | -23.588 | 24.599 | 1.00  | 52.68 | H0    |    |
| ANISOU 2883 HB3 SER A 186 | 5750    | 8800    | 5460   | -1870 | 720   | -930  | H0 |
| ATOM 2884 N CYS A 187     | -59.434 | -21.748 | 21.120 | 1.00  | 52.96 | N0    |    |
| ANISOU 2884 N CYS A 187   | 5820    | 8790    | 5510   | -1380 | 470   | -910  | N0 |
| ATOM 2885 CA CYS A 187    | -59.458 | -20.683 | 20.076 | 1.00  | 53.84 | C0    |    |
| ANISOU 2885 CA CYS A 187  | 5870    | 9010    | 5580   | -1180 | 370   | -910  | C0 |



|                           |         |         |        |       |       |       |    |
|---------------------------|---------|---------|--------|-------|-------|-------|----|
| ATOM 2886 C CYS A 187     | -59.874 | -21.269 | 18.724 | 1.00  | 55.07 | C0    |    |
| ANISOU 2886 C CYS A 187   | 5980    | 9280    | 5670   | -1280 | 340   | -1010 | C0 |
| ATOM 2887 O CYS A 187     | -60.702 | -20.635 | 18.042 | 1.00  | 57.39 | O0    |    |
| ANISOU 2887 O CYS A 187   | 6120    | 9810    | 5870   | -1190 | 270   | -1070 | O0 |
| ATOM 2888 CB CYS A 187    | -58.108 | -19.983 | 19.906 | 1.00  | 52.46 | C0    |    |
| ANISOU 2888 CB CYS A 187  | 5850    | 8610    | 5470   | -1000 | 350   | -800  | C0 |
| ATOM 2889 SG CYS A 187    | -56.803 | -20.994 | 19.146 | 1.00  | 52.74 | S0    |    |
| ANISOU 2889 SG CYS A 187  | 6090    | 8380    | 5570   | -1080 | 390   | -770  | S0 |
| ATOM 2890 H CYS A 187     | -58.614 | -21.833 | 21.507 | 1.00  | 51.89 | H0    |    |
| ANISOU 2890 H CYS A 187   | 5810    | 8480    | 5430   | -1360 | 500   | -830  | H0 |
| ATOM 2891 HA CYS A 187    | -60.125 | -20.010 | 20.345 | 1.00  | 54.11 | H0    |    |
| ANISOU 2891 HA CYS A 187  | 5780    | 9210    | 5570   | -1100 | 340   | -930  | H0 |
| ATOM 2892 HB2 CYS A 187   | -58.236 | -19.187 | 19.352 | 1.00  | 52.62 | H0    |    |
| ANISOU 2892 HB2 CYS A 187 | 5820    | 8720    | 5460   | -860  | 290   | -800  | H0 |
| ATOM 2893 HB3 CYS A 187   | -57.794 | -19.684 | 20.782 | 1.00  | 52.01 | H0    |    |
| ANISOU 2893 HB3 CYS A 187 | 5820    | 8480    | 5450   | -960  | 370   | -740  | H0 |
| ATOM 2894 N CYS A 188     | -59.314 | -22.431 | 18.372 | 1.00  | 54.23 | N0    |    |
| ANISOU 2894 N CYS A 188   | 6010    | 8990    | 5600   | -1440 | 410   | -1030 | N0 |
| ATOM 2895 CA CYS A 188    | -59.090 | -22.877 | 16.974 | 1.00  | 54.22 | C0    |    |
| ANISOU 2895 CA CYS A 188  | 6060    | 8980    | 5560   | -1490 | 380   | -1090 | C0 |
| ATOM 2896 C CYS A 188     | -59.403 | -24.365 | 16.813 | 1.00  | 54.42 | C0    |    |
| ANISOU 2896 C CYS A 188   | 6130    | 8970    | 5580   | -1770 | 470   | -1190 | C0 |
| ATOM 2897 O CYS A 188     | -59.213 | -25.149 | 17.739 | 1.00  | 53.77 | O0    |    |
| ANISOU 2897 O CYS A 188   | 6140    | 8730    | 5560   | -1900 | 560   | -1160 | O0 |
| ATOM 2898 CB CYS A 188    | -57.644 | -22.570 | 16.598 | 1.00  | 53.25 | C0    |    |
| ANISOU 2898 CB CYS A 188  | 6110    | 8600    | 5510   | -1340 | 380   | -980  | C0 |
| ATOM 2899 SG CYS A 188    | -57.114 | -20.911 | 17.111 | 1.00  | 53.43 | S0    |    |
| ANISOU 2899 SG CYS A 188  | 6130    | 8600    | 5570   | -1050 | 310   | -860  | S0 |
| ATOM 2900 H CYS A 188     | -59.023 | -23.045 | 18.979 | 1.00  | 54.18 | H0    |    |
| ANISOU 2900 H CYS A 188   | 6090    | 8860    | 5640   | -1540 | 470   | -1010 | H0 |
| ATOM 2901 HA CYS A 188    | -59.685 | -22.358 | 16.387 | 1.00  | 54.81 | H0    |    |
| ANISOU 2901 HA CYS A 188  | 6010    | 9250    | 5560   | -1420 | 320   | -1130 | H0 |
| ATOM 2902 HB2 CYS A 188   | -57.055 | -23.231 | 17.015 | 1.00  | 53.12 | H0    |    |
| ANISOU 2902 HB2 CYS A 188 | 6210    | 8410    | 5560   | -1410 | 440   | -950  | H0 |
| ATOM 2903 HB3 CYS A 188   | -57.542 | -22.643 | 15.628 | 1.00  | 53.75 | H0    |    |
| ANISOU 2903 HB3 CYS A 188 | 6190    | 8690    | 5540   | -1330 | 350   | -1020 | H0 |
| ATOM 2904 N PRO A 189     | -59.892 | -24.810 | 15.632 | 1.00  | 55.18 | N0    |    |
| ANISOU 2904 N PRO A 189   | 6170    | 9200    | 5590   | -1880 | 450   | -1310 | N0 |
| ATOM 2905 CA PRO A 189    | -60.181 | -26.229 | 15.398 | 1.00  | 56.22 | C0    |    |
| ANISOU 2905 CA PRO A 189  | 6370    | 9280    | 5710   | -2170 | 540   | -1420 | C0 |
| ATOM 2906 C PRO A 189     | -58.952 | -27.105 | 15.090 | 1.00  | 54.94 | C0    |    |
| ANISOU 2906 C PRO A 189   | 6460    | 8780    | 5640   | -2210 | 620   | -1380 | C0 |
| ATOM 2907 O PRO A 189     | -59.024 | -28.294 | 15.309 | 1.00  | 55.77 | O0    |    |
| ANISOU 2907 O PRO A 189   | 6670    | 8760    | 5760   | -2430 | 730   | -1440 | O0 |
| ATOM 2908 CB PRO A 189    | -61.111 | -26.180 | 14.177 | 1.00  | 57.83 | C0    |    |
| ANISOU 2908 CB PRO A 189  | 6410    | 9780    | 5780   | -2230 | 470   | -1570 | C0 |
| ATOM 2909 CG PRO A 189    | -60.627 | -24.976 | 13.402 | 1.00  | 56.86 | C0    |    |
| ANISOU 2909 CG PRO A 189  | 6260    | 9710    | 5630   | -1950 | 350   | -1490 | C0 |
| ATOM 2910 CD PRO A 189    | -60.223 | -23.973 | 14.467 | 1.00  | 55.33 | C0    |    |
| ANISOU 2910 CD PRO A 189  | 6080    | 9430    | 5510   | -1740 | 330   | -1340 | C0 |
| ATOM 2911 HA PRO A 189    | -60.675 | -26.596 | 16.173 | 1.00  | 56.76 | H0    |    |
| ANISOU 2911 HA PRO A 189  | 6400    | 9380    | 5790   | -2290 | 590   | -1440 | H0 |
| ATOM 2912 HB2 PRO A 189   | -61.032 | -26.998 | 13.640 | 1.00  | 58.63 | H0    |    |
| ANISOU 2912 HB2 PRO A 189 | 6580    | 9820    | 5870   | -2390 | 520   | -1640 | H0 |

|                           |         |         |        |       |           |    |
|---------------------------|---------|---------|--------|-------|-----------|----|
| ATOM 2913 HB3 PRO A 189   | -62.046 | -26.068 | 14.451 | 1.00  | 58.87     | H0 |
| ANISOU 2913 HB3 PRO A 189 | 6380    | 10130   | 5850   | -2290 | 450 -1630 | H0 |
| ATOM 2914 HG2 PRO A 189   | -59.865 | -25.210 | 12.836 | 1.00  | 56.34     | H0 |
| ANISOU 2914 HG2 PRO A 189 | 6330    | 9480    | 5590   | -1930 | 370 -1470 | H0 |
| ATOM 2915 HG3 PRO A 189   | -61.342 | -24.615 | 12.839 | 1.00  | 57.80     | H0 |
| ANISOU 2915 HG3 PRO A 189 | 6240    | 10070   | 5660   | -1930 | 280 -1550 | H0 |
| ATOM 2916 HD2 PRO A 189   | -59.451 | -23.450 | 14.182 | 1.00  | 54.24     | H0 |
| ANISOU 2916 HD2 PRO A 189 | 6020    | 9180    | 5410   | -1580 | 310 -1270 | H0 |
| ATOM 2917 HD3 PRO A 189   | -60.957 | -23.365 | 14.672 | 1.00  | 55.81     | H0 |
| ANISOU 2917 HD3 PRO A 189 | 5990    | 9690    | 5530   | -1670 | 280 -1360 | H0 |
| ATOM 2918 N GLU A 190     | -57.860 | -26.503 | 14.610 | 1.00  | 53.26     | N0 |
| ANISOU 2918 N GLU A 190   | 6340    | 8430    | 5470   | -2000 | 580 -1290 | N0 |
| ATOM 2919 CA GLU A 190    | -56.642 | -27.213 | 14.127 | 1.00  | 51.89     | C0 |
| ANISOU 2919 CA GLU A 190  | 6390    | 7960    | 5370   | -2010 | 650 -1260 | C0 |
| ATOM 2920 C GLU A 190     | -55.660 | -27.351 | 15.296 | 1.00  | 49.20     | C0 |
| ANISOU 2920 C GLU A 190   | 6190    | 7360    | 5150   | -1930 | 710 -1110 | C0 |
| ATOM 2921 O GLU A 190     | -55.579 | -26.409 | 16.104 | 1.00  | 48.50     | O0 |
| ANISOU 2921 O GLU A 190   | 6030    | 7310    | 5080   | -1780 | 660 -1020 | O0 |
| ATOM 2922 CB GLU A 190    | -55.981 | -26.454 | 12.969 | 1.00  | 52.14     | C0 |
| ANISOU 2922 CB GLU A 190  | 6430    | 8000    | 5370   | -1830 | 570 -1230 | C0 |
| ATOM 2923 CG GLU A 190    | -56.955 | -25.752 | 12.030 | 1.00  | 53.50     | C0 |
| ANISOU 2923 CG GLU A 190  | 6420    | 8490    | 5410   | -1800 | 460 -1320 | C0 |
| ATOM 2924 CD GLU A 190    | -57.279 | -24.313 | 12.407 | 1.00  | 54.03     | C0 |
| ANISOU 2924 CD GLU A 190  | 6350    | 8730    | 5450   | -1570 | 360 -1230 | C0 |
| ATOM 2925 OE1 GLU A 190   | -56.946 | -23.905 | 13.554 | 1.00  | 52.41     | O0 |
| ANISOU 2925 OE1 GLU A 190 | 6170    | 8420    | 5330   | -1490 | 380 -1130 | O0 |
| ATOM 2926 OE2 GLU A 190   | -57.861 | -23.597 | 11.557 | 1.00  | 55.67     | O0 |
| ANISOU 2926 OE2 GLU A 190 | 6430    | 9170    | 5550   | -1480 | 270 -1270 | O0 |
| ATOM 2927 H GLU A 190     | -57.781 | -25.599 | 14.585 | 1.00  | 52.36     | H0 |
| ANISOU 2927 H GLU A 190   | 6170    | 8380    | 5350   | -1840 | 510 -1240 | H0 |
| ATOM 2928 HA GLU A 190    | -56.901 | -28.112 | 13.818 | 1.00  | 53.11     | H0 |
| ANISOU 2928 HA GLU A 190  | 6590    | 8090    | 5510   | -2190 | 710 -1340 | H0 |
| ATOM 2929 HB2 GLU A 190   | -55.371 | -25.787 | 13.346 | 1.00  | 50.73     | H0 |
| ANISOU 2929 HB2 GLU A 190 | 6280    | 7750    | 5250   | -1670 | 540 -1130 | H0 |
| ATOM 2930 HB3 GLU A 190   | -55.444 | -27.086 | 12.451 | 1.00  | 52.19     | H0 |
| ANISOU 2930 HB3 GLU A 190 | 6560    | 7870    | 5400   | -1880 | 620 -1260 | H0 |
| ATOM 2931 HG2 GLU A 190   | -56.580 | -25.756 | 11.124 | 1.00  | 53.74     | H0 |
| ANISOU 2931 HG2 GLU A 190 | 6500    | 8500    | 5420   | -1770 | 450 -1340 | H0 |
| ATOM 2932 HG3 GLU A 190   | -57.794 | -26.261 | 12.003 | 1.00  | 54.99     | H0 |
| ANISOU 2932 HG3 GLU A 190 | 6530    | 8810    | 5550   | -1950 | 480 -1420 | H0 |
| ATOM 2933 N ALA A 191     | -54.943 | -28.474 | 15.382 | 1.00  | 47.68     | N0 |
| ANISOU 2933 N ALA A 191   | 6190    | 6900    | 5030   | -2030 | 820 -1100 | N0 |
| ATOM 2934 CA ALA A 191    | -53.911 | -28.730 | 16.415 | 1.00  | 45.81     | C0 |
| ANISOU 2934 CA ALA A 191  | 6090    | 6410    | 4900   | -1950 | 880 -960  | C0 |
| ATOM 2935 C ALA A 191     | -52.684 | -27.859 | 16.129 | 1.00  | 43.72     | C0 |
| ANISOU 2935 C ALA A 191   | 5870    | 6060    | 4690   | -1700 | 820 -850  | C0 |
| ATOM 2936 O ALA A 191     | -52.326 | -27.710 | 14.945 | 1.00  | 43.67     | O0 |
| ANISOU 2936 O ALA A 191   | 5880    | 6060    | 4660   | -1660 | 790 -900  | O0 |
| ATOM 2937 CB ALA A 191    | -53.545 | -30.192 | 16.453 | 1.00  | 46.48     | C0 |
| ANISOU 2937 CB ALA A 191  | 6370    | 6250    | 5030   | -2100 | 1010 -980 | C0 |
| ATOM 2938 H ALA A 191     | -55.037 | -29.172 | 14.803 | 1.00  | 48.79     | H0 |
| ANISOU 2938 H ALA A 191   | 6380    | 7010    | 5150   | -2150 | 860 -1180 | H0 |
| ATOM 2939 HA ALA A 191    | -54.280 | -28.472 | 17.292 | 1.00  | 45.68     | H0 |
| ANISOU 2939 HA ALA A 191  | 6020    | 6450    | 4880   | -1950 | 870 -920  | H0 |

|        |      |     |     |   |     |         |         |        |       |       |       |    |
|--------|------|-----|-----|---|-----|---------|---------|--------|-------|-------|-------|----|
| ATOM   | 2940 | HB1 | ALA | A | 191 | -52.882 | -30.343 | 17.148 | 1.00  | 46.11 | H0    |    |
| ANISOU | 2940 | HB1 | ALA | A | 191 | 6420    | 6050    | 5050   | -2030 | 1040  | -880  | H0 |
| ATOM   | 2941 | HB2 | ALA | A | 191 | -54.338 | -30.721 | 16.644 | 1.00  | 47.78 | H0    |    |
| ANISOU | 2941 | HB2 | ALA | A | 191 | 6520    | 6470    | 5160   | -2270 | 1060  | -1050 | H0 |
| ATOM   | 2942 | HB3 | ALA | A | 191 | -53.179 | -30.458 | 15.593 | 1.00  | 46.82 | H0    |    |
| ANISOU | 2942 | HB3 | ALA | A | 191 | 6480    | 6240    | 5070   | -2100 | 1020  | -1020 | H0 |
| ATOM   | 2943 | N   | TYR | A | 192 | -52.092 | -27.290 | 17.182 | 1.00  | 41.89 | N0    |    |
| ANISOU | 2943 | N   | TYR | A | 192 | 5640    | 5760    | 4510   | -1570 | 800   | -730  | N0 |
| ATOM   | 2944 | CA  | TYR | A | 192 | -50.783 | -26.592 | 17.160 | 1.00  | 40.57 | C0    |    |
| ANISOU | 2944 | CA  | TYR | A | 192 | 5530    | 5480    | 4410   | -1360 | 760   | -620  | C0 |
| ATOM   | 2945 | C   | TYR | A | 192 | -49.732 | -27.525 | 17.763 | 1.00  | 40.71 | C0    |    |
| ANISOU | 2945 | C   | TYR | A | 192 | 5710    | 5250    | 4510   | -1350 | 850   | -530  | C0 |
| ATOM   | 2946 | O   | TYR | A | 192 | -50.084 | -28.358 | 18.621 | 1.00  | 40.79 | O0    |    |
| ANISOU | 2946 | O   | TYR | A | 192 | 5770    | 5190    | 4530   | -1470 | 920   | -520  | O0 |
| ATOM   | 2947 | CB  | TYR | A | 192 | -50.865 | -25.246 | 17.885 | 1.00  | 39.36 | C0    |    |
| ANISOU | 2947 | CB  | TYR | A | 192 | 5260    | 5460    | 4240   | -1220 | 680   | -550  | C0 |
| ATOM   | 2948 | CG  | TYR | A | 192 | -51.508 | -24.166 | 17.053 | 1.00  | 39.53 | C0    |    |
| ANISOU | 2948 | CG  | TYR | A | 192 | 5150    | 5680    | 4190   | -1150 | 590   | -610  | C0 |
| ATOM   | 2949 | CD1 | TYR | A | 192 | -52.880 | -24.146 | 16.859 | 1.00  | 40.66 | C0    |    |
| ANISOU | 2949 | CD1 | TYR | A | 192 | 5160    | 6040    | 4250   | -1250 | 560   | -710  | C0 |
| ATOM   | 2950 | CD2 | TYR | A | 192 | -50.749 | -23.189 | 16.428 | 1.00  | 38.42 | C0    |    |
| ANISOU | 2950 | CD2 | TYR | A | 192 | 5020    | 5530    | 4060   | -980  | 540   | -570  | C0 |
| ATOM   | 2951 | CE1 | TYR | A | 192 | -53.486 | -23.172 | 16.083 | 1.00  | 40.83 | C0    |    |
| ANISOU | 2951 | CE1 | TYR | A | 192 | 5060    | 6260    | 4190   | -1160 | 480   | -750  | C0 |
| ATOM   | 2952 | CE2 | TYR | A | 192 | -51.340 | -22.206 | 15.650 | 1.00  | 38.57 | C0    |    |
| ANISOU | 2952 | CE2 | TYR | A | 192 | 4940    | 5720    | 4000   | -900  | 460   | -600  | C0 |
| ATOM   | 2953 | CZ  | TYR | A | 192 | -52.714 | -22.198 | 15.476 | 1.00  | 39.91 | C0    |    |
| ANISOU | 2953 | CZ  | TYR | A | 192 | 4980    | 6110    | 4080   | -980  | 430   | -690  | C0 |
| ATOM   | 2954 | OH  | TYR | A | 192 | -53.316 | -21.246 | 14.702 | 1.00  | 40.77 | O0    |    |
| ANISOU | 2954 | OH  | TYR | A | 192 | 4990    | 6400    | 4110   | -880  | 350   | -720  | O0 |
| ATOM   | 2955 | H   | TYR | A | 192 | -52.463 | -27.293 | 18.014 | 1.00  | 42.19 | H0    |    |
| ANISOU | 2955 | H   | TYR | A | 192 | 5650    | 5830    | 4550   | -1600 | 810   | -700  | H0 |
| ATOM   | 2956 | HA  | TYR | A | 192 | -50.536 | -26.421 | 16.216 | 1.00  | 40.46 | H0    |    |
| ANISOU | 2956 | HA  | TYR | A | 192 | 5520    | 5480    | 4380   | -1320 | 740   | -660  | H0 |
| ATOM   | 2957 | HB2 | TYR | A | 192 | -51.380 | -25.364 | 18.711 | 1.00  | 39.74 | H0    |    |
| ANISOU | 2957 | HB2 | TYR | A | 192 | 5270    | 5550    | 4280   | -1280 | 690   | -540  | H0 |
| ATOM   | 2958 | HB3 | TYR | A | 192 | -49.959 | -24.965 | 18.130 | 1.00  | 38.66 | H0    |    |
| ANISOU | 2958 | HB3 | TYR | A | 192 | 5220    | 5270    | 4200   | -1110 | 670   | -480  | H0 |
| ATOM   | 2959 | HD1 | TYR | A | 192 | -53.414 | -24.807 | 17.269 | 1.00  | 41.42 | H0    |    |
| ANISOU | 2959 | HD1 | TYR | A | 192 | 5250    | 6150    | 4340   | -1380 | 600   | -740  | H0 |
| ATOM   | 2960 | HD2 | TYR | A | 192 | -49.813 | -23.187 | 16.542 | 1.00  | 37.87 | H0    |    |
| ANISOU | 2960 | HD2 | TYR | A | 192 | 5020    | 5330    | 4040   | -920  | 560   | -510  | H0 |
| ATOM   | 2961 | HE1 | TYR | A | 192 | -54.422 | -23.173 | 15.967 | 1.00  | 41.64 | H0    |    |
| ANISOU | 2961 | HE1 | TYR | A | 192 | 5070    | 6520    | 4230   | -1220 | 460   | -810  | H0 |
| ATOM   | 2962 | HE2 | TYR | A | 192 | -50.809 | -21.546 | 15.236 | 1.00  | 38.04 | H0    |    |
| ANISOU | 2962 | HE2 | TYR | A | 192 | 4890    | 5630    | 3940   | -790  | 440   | -570  | H0 |
| ATOM   | 2963 | N   | GLU | A | 193 | -48.488 | -27.403 | 17.297 | 1.00  | 39.95 | N0    |    |
| ANISOU | 2963 | N   | GLU | A | 193 | 5690    | 5020    | 4470   | -1220 | 850   | -480  | N0 |
| ATOM   | 2964 | CA  | GLU | A | 193 | -47.352 | -28.236 | 17.763 | 1.00  | 40.88 | C0    |    |
| ANISOU | 2964 | CA  | GLU | A | 193 | 5950    | 4910    | 4670   | -1170 | 920   | -390  | C0 |
| ATOM   | 2965 | C   | GLU | A | 193 | -46.380 | -27.350 | 18.543 | 1.00  | 39.59 | C0    |    |
| ANISOU | 2965 | C   | GLU | A | 193 | 5750    | 4740    | 4550   | -990  | 870   | -270  | C0 |
| ATOM   | 2966 | O   | GLU | A | 193 | -46.321 | -26.142 | 18.270 | 1.00  | 38.28 | O0    |    |
| ANISOU | 2966 | O   | GLU | A | 193 | 5480    | 4700    | 4360   | -900  | 790   | -270  | O0 |

|                           |         |         |        |       |       |      |    |
|---------------------------|---------|---------|--------|-------|-------|------|----|
| ATOM 2967 CB GLU A 193    | -46.686 | -28.942 | 16.583 | 1.00  | 41.99 | C0   |    |
| ANISOU 2967 CB GLU A 193  | 6200    | 4910    | 4840   | -1170 | 980   | -440 | C0 |
| ATOM 2968 CG GLU A 193    | -47.561 | -30.026 | 15.984 | 1.00  | 44.22 | C0   |    |
| ANISOU 2968 CG GLU A 193  | 6550    | 5170    | 5080   | -1370 | 1060  | -560 | C0 |
| ATOM 2969 CD GLU A 193    | -46.873 | -30.952 | 14.996 | 1.00  | 45.61 | C0   |    |
| ANISOU 2969 CD GLU A 193  | 6870    | 5160    | 5290   | -1380 | 1150  | -610 | C0 |
| ATOM 2970 OE1 GLU A 193   | -47.577 | -31.788 | 14.392 | 1.00  | 47.48 | O0   |    |
| ANISOU 2970 OE1 GLU A 193 | 7170    | 5380    | 5490   | -1560 | 1220  | -730 | O0 |
| ATOM 2971 OE2 GLU A 193   | -45.638 | -30.849 | 14.846 | 1.00  | 45.25 | O0   |    |
| ANISOU 2971 OE2 GLU A 193 | 6880    | 5000    | 5310   | -1220 | 1160  | -540 | O0 |
| ATOM 2972 H GLU A 193     | -48.260 | -26.793 | 16.660 | 1.00  | 39.63 | H0   |    |
| ANISOU 2972 H GLU A 193   | 5610    | 5030    | 4420   | -1150 | 800   | -490 | H0 |
| ATOM 2973 HA GLU A 193    | -47.705 | -28.919 | 18.373 | 1.00  | 41.57 | H0   |    |
| ANISOU 2973 HA GLU A 193  | 6090    | 4950    | 4760   | -1250 | 980   | -380 | H0 |
| ATOM 2974 HB2 GLU A 193   | -46.477 | -28.278 | 15.893 | 1.00  | 41.42 | H0   |    |
| ANISOU 2974 HB2 GLU A 193 | 6080    | 4910    | 4750   | -1100 | 940   | -460 | H0 |
| ATOM 2975 HB3 GLU A 193   | -45.845 | -29.340 | 16.889 | 1.00  | 42.04 | H0   |    |
| ANISOU 2975 HB3 GLU A 193 | 6290    | 4780    | 4900   | -1100 | 1020  | -370 | H0 |
| ATOM 2976 HG2 GLU A 193   | -47.927 | -30.572 | 16.712 | 1.00  | 44.81 | H0   |    |
| ANISOU 2976 HG2 GLU A 193 | 6670    | 5200    | 5160   | -1450 | 1110  | -550 | H0 |
| ATOM 2977 HG3 GLU A 193   | -48.318 | -29.601 | 15.529 | 1.00  | 44.22 | H0   |    |
| ANISOU 2977 HG3 GLU A 193 | 6460    | 5320    | 5020   | -1430 | 1010  | -640 | H0 |
| ATOM 2978 N ASP A 194     | -45.680 | -27.937 | 19.510 | 1.00  | 40.06 | N0   |    |
| ANISOU 2978 N ASP A 194   | 5890    | 4670    | 4660   | -940  | 910   | -170 | N0 |
| ATOM 2979 CA ASP A 194    | -44.657 | -27.237 | 20.321 | 1.00  | 39.40 | C0   |    |
| ANISOU 2979 CA ASP A 194  | 5770    | 4580    | 4610   | -790  | 870   | -60  | C0 |
| ATOM 2980 C ASP A 194     | -43.568 | -28.242 | 20.692 | 1.00  | 40.60 | C0   |    |
| ANISOU 2980 C ASP A 194   | 6050    | 4550    | 4820   | -720  | 940   | 40   | C0 |
| ATOM 2981 O ASP A 194     | -43.859 | -29.463 | 20.705 | 1.00  | 42.83 | O0   |    |
| ANISOU 2981 O ASP A 194   | 6460    | 4700    | 5120   | -800  | 1030  | 30   | O0 |
| ATOM 2982 CB ASP A 194    | -45.283 | -26.561 | 21.545 | 1.00  | 39.12 | C0   |    |
| ANISOU 2982 CB ASP A 194  | 5650    | 4680    | 4530   | -800  | 820   | -20  | C0 |
| ATOM 2983 CG ASP A 194    | -45.756 | -27.523 | 22.620 | 1.00  | 40.33 | C0   |    |
| ANISOU 2983 CG ASP A 194  | 5870    | 4770    | 4680   | -900  | 880   | 30   | C0 |
| ATOM 2984 OD1 ASP A 194   | -44.889 | -28.128 | 23.274 | 1.00  | 41.29 | O0   |    |
| ANISOU 2984 OD1 ASP A 194 | 6080    | 4770    | 4840   | -830  | 910   | 130  | O0 |
| ATOM 2985 OD2 ASP A 194   | -46.987 | -27.658 | 22.797 | 1.00  | 40.39 | O0   |    |
| ANISOU 2985 OD2 ASP A 194 | 5840    | 4860    | 4640   | -1040 | 890   | -30  | O0 |
| ATOM 2986 H ASP A 194     | -45.794 | -28.813 | 19.735 | 1.00  | 40.92 | H0   |    |
| ANISOU 2986 H ASP A 194   | 6090    | 4680    | 4780   | -1010 | 980   | -160 | H0 |
| ATOM 2987 HA ASP A 194    | -44.252 | -26.536 | 19.761 | 1.00  | 38.78 | H0   |    |
| ANISOU 2987 HA ASP A 194  | 5650    | 4550    | 4530   | -720  | 830   | -70  | H0 |
| ATOM 2988 HB2 ASP A 194   | -44.624 | -25.957 | 21.944 | 1.00  | 38.48 | H0   |    |
| ANISOU 2988 HB2 ASP A 194 | 5530    | 4620    | 4470   | -700  | 780   | 40   | H0 |
| ATOM 2989 HB3 ASP A 194   | -46.049 | -26.026 | 21.254 | 1.00  | 38.92 | H0   |    |
| ANISOU 2989 HB3 ASP A 194 | 5550    | 4770    | 4470   | -850  | 780   | -80  | H0 |
| ATOM 2990 N VAL A 195     | -42.364 | -27.739 | 20.969 | 1.00  | 39.91 | N0   |    |
| ANISOU 2990 N VAL A 195   | 5940    | 4450    | 4770   | -560  | 900   | 120  | N0 |
| ATOM 2991 CA VAL A 195    | -41.264 | -28.516 | 21.606 | 1.00  | 40.35 | C0   |    |
| ANISOU 2991 CA VAL A 195  | 6080    | 4370    | 4880   | -450  | 940   | 230  | C0 |
| ATOM 2992 C VAL A 195     | -41.139 | -28.029 | 23.053 | 1.00  | 39.47 | C0   |    |
| ANISOU 2992 C VAL A 195   | 5910    | 4350    | 4740   | -400  | 890   | 330  | C0 |
| ATOM 2993 O VAL A 195     | -40.956 | -26.814 | 23.266 | 1.00  | 37.47 | O0   |    |
| ANISOU 2993 O VAL A 195   | 5530    | 4240    | 4470   | -360  | 810   | 320  | O0 |

|                            |         |         |        |      |       |     |    |
|----------------------------|---------|---------|--------|------|-------|-----|----|
| ATOM 2994 CB VAL A 195     | -39.946 | -28.398 | 20.819 | 1.00 | 40.36 | C0  |    |
| ANISOU 2994 CB VAL A 195   | 6080    | 4320    | 4930   | -310 | 950   | 240 | C0 |
| ATOM 2995 CG1 VAL A 195    | -38.794 | -29.067 | 21.548 | 1.00 | 41.68 | C0  |    |
| ANISOU 2995 CG1 VAL A 195  | 6300    | 4390    | 5140   | -170 | 980   | 360 | C0 |
| ATOM 2996 CG2 VAL A 195    | -40.095 | -28.985 | 19.421 | 1.00 | 41.46 | C0  |    |
| ANISOU 2996 CG2 VAL A 195  | 6290    | 4370    | 5090   | -370 | 1010  | 140 | C0 |
| ATOM 2997 H VAL A 195      | -42.138 | -26.876 | 20.782 | 1.00 | 39.06 | H0  |    |
| ANISOU 2997 H VAL A 195    | 5750    | 4430    | 4660   | -510 | 850   | 100 | H0 |
| ATOM 2998 HA VAL A 195     | -41.524 | -29.454 | 21.621 | 1.00 | 41.30 | H0  |    |
| ANISOU 2998 HA VAL A 195   | 6300    | 4390    | 5010   | -510 | 1010  | 230 | H0 |
| ATOM 2999 HB VAL A 195     | -39.735 | -27.437 | 20.727 | 1.00 | 39.63 | H0  |    |
| ANISOU 2999 HB VAL A 195   | 5890    | 4340    | 4830   | -280 | 890   | 220 | H0 |
| ATOM 3000 HG11 VAL A 195   | -38.491 | -28.494 | 22.274 | 1.00 | 41.08 | H0  |    |
| ANISOU 3000 HG11 VAL A 195 | 6150    | 4410    | 5050   | -120 | 920   | 410 | H0 |
| ATOM 3001 HG12 VAL A 195   | -38.059 | -29.217 | 20.929 | 1.00 | 41.67 | H0  |    |
| ANISOU 3001 HG12 VAL A 195 | 6310    | 4340    | 5180   | -100 | 1000  | 350 | H0 |
| ATOM 3002 HG13 VAL A 195   | -39.090 | -29.920 | 21.911 | 1.00 | 42.43 | H0  |    |
| ANISOU 3002 HG13 VAL A 195 | 6490    | 4390    | 5240   | -210 | 1030  | 390 | H0 |
| ATOM 3003 HG21 VAL A 195   | -40.360 | -29.919 | 19.488 | 1.00 | 42.23 | H0  |    |
| ANISOU 3003 HG21 VAL A 195 | 6490    | 4360    | 5200   | -420 | 1080  | 140 | H0 |
| ATOM 3004 HG22 VAL A 195   | -39.247 | -28.921 | 18.949 | 1.00 | 41.20 | H0  |    |
| ANISOU 3004 HG22 VAL A 195 | 6260    | 4310    | 5090   | -280 | 1020  | 140 | H0 |
| ATOM 3005 HG23 VAL A 195   | -40.775 | -28.490 | 18.932 | 1.00 | 40.80 | H0  |    |
| ANISOU 3005 HG23 VAL A 195 | 6160    | 4370    | 4970   | -440 | 980   | 60  | H0 |
| ATOM 3006 N GLU A 196      | -41.295 | -28.952 | 24.001 | 1.00 | 40.44 | N0  |    |
| ANISOU 3006 N GLU A 196    | 6120    | 4390    | 4850   | -430 | 940   | 410 | N0 |
| ATOM 3007 CA GLU A 196     | -41.130 | -28.702 | 25.452 | 1.00 | 40.41 | C0  |    |
| ANISOU 3007 CA GLU A 196   | 6080    | 4460    | 4810   | -380 | 900   | 510 | C0 |
| ATOM 3008 C GLU A 196      | -39.701 | -29.085 | 25.845 | 1.00 | 40.04 | C0  |    |
| ANISOU 3008 C GLU A 196    | 6070    | 4350    | 4800   | -200 | 900   | 630 | C0 |
| ATOM 3009 O GLU A 196      | -39.361 | -30.275 | 25.763 | 1.00 | 40.75 | O0  |    |
| ANISOU 3009 O GLU A 196    | 6290    | 4270    | 4920   | -160 | 980   | 690 | O0 |
| ATOM 3010 CB GLU A 196     | -42.158 | -29.503 | 26.247 | 1.00 | 42.35 | C0  |    |
| ANISOU 3010 CB GLU A 196   | 6420    | 4660    | 5020   | -510 | 960   | 540 | C0 |
| ATOM 3011 CG GLU A 196     | -42.170 | -29.163 | 27.727 | 1.00 | 43.30 | C0  |    |
| ANISOU 3011 CG GLU A 196   | 6500    | 4880    | 5080   | -480 | 920   | 640 | C0 |
| ATOM 3012 CD GLU A 196     | -43.256 | -29.862 | 28.529 | 1.00 | 45.07 | C0  |    |
| ANISOU 3012 CD GLU A 196   | 6800    | 5070    | 5250   | -630 | 980   | 660 | C0 |
| ATOM 3013 OE1 GLU A 196    | -43.603 | -29.344 | 29.611 | 1.00 | 46.51 | O0  |    |
| ANISOU 3013 OE1 GLU A 196  | 6920    | 5380    | 5370   | -650 | 940   | 700 | O0 |
| ATOM 3014 OE2 GLU A 196    | -43.749 | -30.917 | 28.073 | 1.00 | 46.43 | O0  |    |
| ANISOU 3014 OE2 GLU A 196  | 7100    | 5100    | 5440   | -730 | 1080  | 630 | O0 |
| ATOM 3015 H GLU A 196      | -41.517 | -29.814 | 23.808 | 1.00 | 41.32 | H0  |    |
| ANISOU 3015 H GLU A 196    | 6330    | 4390    | 4980   | -470 | 1010  | 400 | H0 |
| ATOM 3016 HA GLU A 196     | -41.266 | -27.742 | 25.626 | 1.00 | 39.51 | H0  |    |
| ANISOU 3016 HA GLU A 196   | 5860    | 4470    | 4670   | -380 | 830   | 490 | H0 |
| ATOM 3017 HB2 GLU A 196    | -43.048 | -29.331 | 25.873 | 1.00 | 42.13 | H0  |    |
| ANISOU 3017 HB2 GLU A 196  | 6360    | 4680    | 4970   | -620 | 960   | 450 | H0 |
| ATOM 3018 HB3 GLU A 196    | -41.965 | -30.458 | 26.140 | 1.00 | 43.35 | H0  |    |
| ANISOU 3018 HB3 GLU A 196  | 6660    | 4640    | 5170   | -500 | 1030  | 570 | H0 |
| ATOM 3019 HG2 GLU A 196    | -41.300 | -29.399 | 28.115 | 1.00 | 43.64 | H0  |    |
| ANISOU 3019 HG2 GLU A 196  | 6570    | 4880    | 5130   | -370 | 910   | 730 | H0 |
| ATOM 3020 HG3 GLU A 196    | -42.285 | -28.194 | 27.829 | 1.00 | 42.31 | H0  |    |
| ANISOU 3020 HG3 GLU A 196  | 6260    | 4880    | 4930   | -480 | 850   | 600 | H0 |

|                            |         |         |        |      |       |      |    |
|----------------------------|---------|---------|--------|------|-------|------|----|
| ATOM 3021 N VAL A 197      | -38.900 | -28.097 | 26.238 | 1.00 | 38.46 |      | N0 |
| ANISOU 3021 N VAL A 197    | 5740    | 4280    | 4590   | -100 | 810   | 660  | N0 |
| ATOM 3022 CA VAL A 197     | -37.506 | -28.287 | 26.726 | 1.00 | 39.16 |      | C0 |
| ANISOU 3022 CA VAL A 197   | 5810    | 4370    | 4690   | 70   | 790   | 770  | C0 |
| ATOM 3023 C VAL A 197      | -37.531 | -28.210 | 28.257 | 1.00 | 39.24 |      | C0 |
| ANISOU 3023 C VAL A 197    | 5800    | 4470    | 4630   | 90   | 750   | 870  | C0 |
| ATOM 3024 O VAL A 197      | -37.898 | -27.146 | 28.792 | 1.00 | 37.88 |      | O0 |
| ANISOU 3024 O VAL A 197    | 5520    | 4460    | 4410   | 30   | 680   | 840  | O0 |
| ATOM 3025 CB VAL A 197     | -36.553 | -27.246 | 26.115 | 1.00 | 38.44 |      | C0 |
| ANISOU 3025 CB VAL A 197   | 5590    | 4390    | 4630   | 140  | 730   | 720  | C0 |
| ATOM 3026 CG1 VAL A 197    | -35.108 | -27.497 | 26.518 | 1.00 | 39.47 |      | C0 |
| ANISOU 3026 CG1 VAL A 197  | 5680    | 4540    | 4770   | 320  | 720   | 810  | C0 |
| ATOM 3027 CG2 VAL A 197    | -36.693 | -27.193 | 24.602 | 1.00 | 38.30 |      | C0 |
| ANISOU 3027 CG2 VAL A 197  | 5590    | 4300    | 4660   | 100  | 770   | 610  | C0 |
| ATOM 3028 H VAL A 197      | -39.161 | -27.225 | 26.231 | 1.00 | 37.81 |      | H0 |
| ANISOU 3028 H VAL A 197    | 5570    | 4310    | 4490   | -140 | 760   | 610  | H0 |
| ATOM 3029 HA VAL A 197     | -37.204 | -29.174 | 26.463 | 1.00 | 40.02 |      | H0 |
| ANISOU 3029 HA VAL A 197   | 6020    | 4350    | 4830   | 120  | 850   | 800  | H0 |
| ATOM 3030 HB VAL A 197     | -36.815 | -26.361 | 26.471 | 1.00 | 37.75 |      | H0 |
| ANISOU 3030 HB VAL A 197   | 5420    | 4420    | 4510   | 100  | 680   | 690  | H0 |
| ATOM 3031 HG11 VAL A 197   | -34.985 | -27.262 | 27.454 | 1.00 | 39.58 |      | H0 |
| ANISOU 3031 HG11 VAL A 197 | 5650    | 4640    | 4740   | 340  | 670   | 870  | H0 |
| ATOM 3032 HG12 VAL A 197   | -34.516 | -26.952 | 25.969 | 1.00 | 38.95 |      | H0 |
| ANISOU 3032 HG12 VAL A 197 | 5540    | 4520    | 4730   | 350  | 700   | 770  | H0 |
| ATOM 3033 HG13 VAL A 197   | -34.893 | -28.437 | 26.390 | 1.00 | 40.40 |      | H0 |
| ANISOU 3033 HG13 VAL A 197 | 5890    | 4540    | 4920   | 380  | 770   | 860  | H0 |
| ATOM 3034 HG21 VAL A 197   | -36.734 | -28.099 | 24.248 | 1.00 | 38.95 |      | H0 |
| ANISOU 3034 HG21 VAL A 197 | 5770    | 4260    | 4770   | 110  | 840   | 620  | H0 |
| ATOM 3035 HG22 VAL A 197   | -35.928 | -26.732 | 24.220 | 1.00 | 37.90 |      | H0 |
| ANISOU 3035 HG22 VAL A 197 | 5480    | 4290    | 4630   | 170  | 750   | 590  | H0 |
| ATOM 3036 HG23 VAL A 197   | -37.508 | -26.717 | 24.367 | 1.00 | 37.53 |      | H0 |
| ANISOU 3036 HG23 VAL A 197 | 5480    | 4240    | 4540   | 10   | 760   | 540  | H0 |
| ATOM 3037 N SER A 198      | -37.180 | -29.315 | 28.916 | 1.00 | 40.06 |      | N0 |
| ANISOU 3037 N SER A 198    | 6020    | 4480    | 4730   | 170  | 790   | 1000 | N0 |
| ATOM 3038 CA SER A 198     | -37.067 | -29.440 | 30.390 | 1.00 | 41.02 |      | C0 |
| ANISOU 3038 CA SER A 198   | 6140    | 4670    | 4770   | 210  | 760   | 1120 | C0 |
| ATOM 3039 C SER A 198      | -35.592 | -29.310 | 30.772 | 1.00 | 41.49 |      | C0 |
| ANISOU 3039 C SER A 198    | 6120    | 4820    | 4820   | 410  | 700   | 1210 | C0 |
| ATOM 3040 O SER A 198      | -34.801 | -30.207 | 30.413 | 1.00 | 42.28 |      | O0 |
| ANISOU 3040 O SER A 198    | 6290    | 4800    | 4970   | 550  | 750   | 1280 | O0 |
| ATOM 3041 CB SER A 198     | -37.667 | -30.736 | 30.877 | 1.00 | 42.62 |      | C0 |
| ANISOU 3041 CB SER A 198   | 6530    | 4710    | 4950   | 180  | 850   | 1210 | C0 |
| ATOM 3042 OG SER A 198     | -39.017 | -30.861 | 30.443 | 1.00 | 42.16 |      | O0 |
| ANISOU 3042 OG SER A 198   | 6530    | 4590    | 4900   | -20  | 910   | 1110 | O0 |
| ATOM 3043 H SER A 198      | -36.978 | -30.096 | 28.493 | 1.00 | 41.00 |      | H0 |
| ANISOU 3043 H SER A 198    | 6230    | 4460    | 4880   | 210  | 850   | 1020 | H0 |
| ATOM 3044 HA SER A 198     | -37.568 | -28.688 | 30.805 | 1.00 | 40.24 |      | H0 |
| ANISOU 3044 HA SER A 198   | 5970    | 4690    | 4630   | 130  | 720   | 1080 | H0 |
| ATOM 3045 HB2 SER A 198    | -37.140 | -31.489 | 30.532 | 1.00 | 43.49 |      | H0 |
| ANISOU 3045 HB2 SER A 198  | 6730    | 4690    | 5100   | 270  | 900   | 1260 | H0 |
| ATOM 3046 HB3 SER A 198    | -37.634 | -30.762 | 31.860 | 1.00 | 43.12 |      | H0 |
| ANISOU 3046 HB3 SER A 198  | 6600    | 4830    | 4950   | 200  | 830   | 1290 | H0 |
| ATOM 3047 N LEU A 199      | -35.248 | -28.200 | 31.427 | 1.00 | 40.84 |      | N0 |
| ANISOU 3047 N LEU A 199    | 5880    | 4950    | 4690   | 410  | 600   | 1200 | N0 |

|                            |         |         |        |      |       |      |
|----------------------------|---------|---------|--------|------|-------|------|
| ATOM 3048 CA LEU A 199     | -33.879 | -27.870 | 31.893 | 1.00 | 42.02 | C0   |
| ANISOU 3048 CA LEU A 199   | 5910    | 5240    | 4810   | 570  | 530   | 1260 |
| ATOM 3049 C LEU A 199      | -33.793 | -28.188 | 33.385 | 1.00 | 43.37 | C0   |
| ANISOU 3049 C LEU A 199    | 6100    | 5500    | 4880   | 620  | 490   | 1400 |
| ATOM 3050 O LEU A 199      | -34.345 | -27.409 | 34.187 | 1.00 | 42.53 | O0   |
| ANISOU 3050 O LEU A 199    | 5930    | 5530    | 4690   | 510  | 440   | 1370 |
| ATOM 3051 CB LEU A 199     | -33.622 | -26.387 | 31.611 | 1.00 | 41.53 | C0   |
| ANISOU 3051 CB LEU A 199   | 5680    | 5350    | 4750   | 500  | 460   | 1140 |
| ATOM 3052 CG LEU A 199     | -32.344 | -25.800 | 32.202 | 1.00 | 42.46 | C0   |
| ANISOU 3052 CG LEU A 199   | 5640    | 5670    | 4820   | 610  | 370   | 1170 |
| ATOM 3053 CD1 LEU A 199    | -31.117 | -26.492 | 31.629 | 1.00 | 43.74 | C0   |
| ANISOU 3053 CD1 LEU A 199  | 5780    | 5800    | 5040   | 780  | 390   | 1230 |
| ATOM 3054 CD2 LEU A 199    | -32.289 | -24.302 | 31.939 | 1.00 | 41.73 | C0   |
| ANISOU 3054 CD2 LEU A 199  | 5410    | 5720    | 4730   | 500  | 330   | 1040 |
| ATOM 3055 H LEU A 199      | -35.859 | -27.558 | 31.639 | 1.00 | 40.21 | H0   |
| ANISOU 3055 H LEU A 199    | 5760    | 4940    | 4580   | 310  | 580   | 1140 |
| ATOM 3056 HA LEU A 199     | -33.229 | -28.423 | 31.402 | 1.00 | 42.73 | H0   |
| ANISOU 3056 HA LEU A 199   | 6030    | 5260    | 4950   | 670  | 560   | 1290 |
| ATOM 3057 HB2 LEU A 199    | -33.598 | -26.261 | 30.642 | 1.00 | 40.79 | H0   |
| ANISOU 3057 HB2 LEU A 199  | 5580    | 5200    | 4720   | 480  | 490   | 1070 |
| ATOM 3058 HB3 LEU A 199    | -34.381 | -25.875 | 31.954 | 1.00 | 40.76 | H0   |
| ANISOU 3058 HB3 LEU A 199  | 5570    | 5300    | 4610   | 400  | 440   | 1100 |
| ATOM 3059 HG LEU A 199     | -32.354 | -25.943 | 33.179 | 1.00 | 43.24 | H0   |
| ANISOU 3059 HG LEU A 199   | 5740    | 5840    | 4850   | 630  | 340   | 1250 |
| ATOM 3060 HD11 LEU A 199   | -31.021 | -27.372 | 32.033 | 1.00 | 44.81 | H0   |
| ANISOU 3060 HD11 LEU A 199 | 6000    | 5870    | 5160   | 870  | 410   | 1330 |
| ATOM 3061 HD12 LEU A 199   | -30.325 | -25.960 | 31.821 | 1.00 | 43.84 | H0   |
| ANISOU 3061 HD12 LEU A 199 | 5670    | 5950    | 5030   | 820  | 340   | 1220 |
| ATOM 3062 HD13 LEU A 199   | -31.217 | -26.587 | 30.666 | 1.00 | 43.16 | H0   |
| ANISOU 3062 HD13 LEU A 199 | 5740    | 5620    | 5040   | 760  | 440   | 1170 |
| ATOM 3063 HD21 LEU A 199   | -32.300 | -24.139 | 30.980 | 1.00 | 40.88 | H0   |
| ANISOU 3063 HD21 LEU A 199 | 5310    | 5540    | 4680   | 480  | 360   | 970  |
| ATOM 3064 HD22 LEU A 199   | -31.474 | -23.934 | 32.322 | 1.00 | 41.97 | H0   |
| ANISOU 3064 HD22 LEU A 199 | 5340    | 5880    | 4720   | 550  | 280   | 1050 |
| ATOM 3065 HD23 LEU A 199   | -33.061 | -23.872 | 32.349 | 1.00 | 41.00 | H0   |
| ANISOU 3065 HD23 LEU A 199 | 5330    | 5650    | 4590   | 400  | 320   | 1010 |
| ATOM 3066 N ASN A 200      | -33.184 | -29.329 | 33.717 | 1.00 | 45.39 | N0   |
| ANISOU 3066 N ASN A 200    | 6450    | 5670    | 5120   | 780  | 520   | 1540 |
| ATOM 3067 CA ASN A 200     | -32.874 | -29.766 | 35.102 | 1.00 | 47.11 | C0   |
| ANISOU 3067 CA ASN A 200   | 6690    | 5980    | 5230   | 880  | 480   | 1700 |
| ATOM 3068 C ASN A 200      | -31.497 | -29.200 | 35.457 | 1.00 | 47.86 | C0   |
| ANISOU 3068 C ASN A 200    | 6600    | 6300    | 5290   | 1030 | 380   | 1730 |
| ATOM 3069 O ASN A 200      | -30.501 | -29.688 | 34.897 | 1.00 | 49.24 | O0   |
| ANISOU 3069 O ASN A 200    | 6750    | 6440    | 5520   | 1200 | 390   | 1770 |
| ATOM 3070 CB ASN A 200     | -32.947 | -31.291 | 35.235 | 1.00 | 49.14 | C0   |
| ANISOU 3070 CB ASN A 200   | 7160    | 6010    | 5500   | 990  | 580   | 1850 |
| ATOM 3071 CG ASN A 200     | -32.743 | -31.792 | 36.650 | 1.00 | 51.09 | C0   |
| ANISOU 3071 CG ASN A 200   | 7470    | 6330    | 5620   | 1090 | 550   | 2030 |
| ATOM 3072 OD1 ASN A 200    | -32.905 | -31.049 | 37.616 | 1.00 | 51.40 | O0   |
| ANISOU 3072 OD1 ASN A 200  | 7410    | 6570    | 5550   | 1030 | 470   | 2030 |
| ATOM 3073 ND2 ASN A 200    | -32.397 | -33.061 | 36.787 | 1.00 | 53.17 | N0   |
| ANISOU 3073 ND2 ASN A 200  | 7900    | 6420    | 5880   | 1250 | 620   | 2180 |
| ATOM 3074 H ASN A 200      | -32.914 | -29.930 | 33.087 | 1.00 | 45.79 | H0   |
| ANISOU 3074 H ASN A 200    | 6560    | 5600    | 5240   | 850  | 570   | 1550 |

|                            |         |         |        |      |       |      |
|----------------------------|---------|---------|--------|------|-------|------|
| ATOM 3075 HA ASN A 200     | -33.545 | -29.379 | 35.706 | 1.00 | 46.77 | H0   |
| ANISOU 3075 HA ASN A 200   | 6640    | 6000    | 5130   | 770  | 460   | 1690 |
| ATOM 3076 HB2 ASN A 200    | -33.823 | -31.591 | 34.917 | 1.00 | 48.78 | H0   |
| ANISOU 3076 HB2 ASN A 200  | 7230    | 5830    | 5480   | 870  | 650   | 1810 |
| ATOM 3077 HB3 ASN A 200    | -32.265 | -31.689 | 34.657 | 1.00 | 49.65 | H0   |
| ANISOU 3077 HB3 ASN A 200  | 7240    | 6010    | 5620   | 1110 | 600   | 1870 |
| ATOM 3078 HD21 ASN A 200   | -32.117 | -33.361 | 37.570 | 1.00 | 54.38 | H0   |
| ANISOU 3078 HD21 ASN A 200 | 8080    | 6620    | 5960   | 1350 | 590   | 2300 |
| ATOM 3079 HD22 ASN A 200   | -32.444 | -33.610 | 36.095 | 1.00 | 53.34 | H0   |
| ANISOU 3079 HD22 ASN A 200 | 8010    | 6280    | 5980   | 1270 | 690   | 2170 |
| ATOM 3080 N PHE A 201      | -31.454 | -28.197 | 36.337 | 1.00 | 47.71 | N0   |
| ANISOU 3080 N PHE A 201    | 6440    | 6510    | 5170   | 960  | 280   | 1700 |
| ATOM 3081 CA PHE A 201     | -30.227 | -27.455 | 36.723 | 1.00 | 48.48 | C0   |
| ANISOU 3081 CA PHE A 201   | 6330    | 6870    | 5220   | 1050 | 180   | 1690 |
| ATOM 3082 C PHE A 201      | -30.228 | -27.204 | 38.235 | 1.00 | 49.83 | C0   |
| ANISOU 3082 C PHE A 201    | 6460    | 7240    | 5230   | 1040 | 100   | 1770 |
| ATOM 3083 O PHE A 201      | -31.293 | -27.310 | 38.871 | 1.00 | 48.92 | O0   |
| ANISOU 3083 O PHE A 201    | 6450    | 7080    | 5060   | 930  | 130   | 1800 |
| ATOM 3084 CB PHE A 201     | -30.143 | -26.143 | 35.940 | 1.00 | 46.79 | C0   |
| ANISOU 3084 CB PHE A 201   | 5980    | 6740    | 5060   | 920  | 150   | 1510 |
| ATOM 3085 CG PHE A 201     | -31.143 | -25.098 | 36.363 | 1.00 | 45.49 | C0   |
| ANISOU 3085 CG PHE A 201   | 5800    | 6640    | 4850   | 710  | 140   | 1400 |
| ATOM 3086 CD1 PHE A 201    | -32.472 | -25.194 | 35.984 | 1.00 | 44.70 | C0   |
| ANISOU 3086 CD1 PHE A 201  | 5820    | 6370    | 4790   | 580  | 210   | 1350 |
| ATOM 3087 CD2 PHE A 201    | -30.757 | -24.025 | 37.153 | 1.00 | 45.49 | C0   |
| ANISOU 3087 CD2 PHE A 201  | 5650    | 6880    | 4760   | 660  | 50    | 1350 |
| ATOM 3088 CE1 PHE A 201    | -33.394 | -24.240 | 36.383 | 1.00 | 43.75 | C0   |
| ANISOU 3088 CE1 PHE A 201  | 5680    | 6320    | 4620   | 420  | 200   | 1260 |
| ATOM 3089 CE2 PHE A 201    | -31.680 | -23.070 | 37.548 | 1.00 | 44.40 | C0   |
| ANISOU 3089 CE2 PHE A 201  | 5510    | 6790    | 4580   | 480  | 50    | 1250 |
| ATOM 3090 CZ PHE A 201     | -32.996 | -23.180 | 37.163 | 1.00 | 43.60 | C0   |
| ANISOU 3090 CZ PHE A 201   | 5530    | 6520    | 4520   | 370  | 120   | 1210 |
| ATOM 3091 H PHE A 201      | -32.193 | -27.892 | 36.774 | 1.00 | 47.24 | H0   |
| ANISOU 3091 H PHE A 201    | 6410    | 6470    | 5070   | 850  | 280   | 1680 |
| ATOM 3092 HA PHE A 201     | -29.438 | -28.009 | 36.499 | 1.00 | 49.54 | H0   |
| ANISOU 3092 HA PHE A 201   | 6460    | 6990    | 5370   | 1200 | 180   | 1760 |
| ATOM 3093 HB2 PHE A 201    | -29.240 | -25.777 | 36.044 | 1.00 | 47.23 | H0   |
| ANISOU 3093 HB2 PHE A 201  | 5910    | 6950    | 5090   | 980  | 100   | 1500 |
| ATOM 3094 HB3 PHE A 201    | -30.277 | -26.341 | 34.990 | 1.00 | 46.17 | H0   |
| ANISOU 3094 HB3 PHE A 201  | 5950    | 6520    | 5070   | 910  | 210   | 1460 |
| ATOM 3095 HD1 PHE A 201    | -32.751 | -25.921 | 35.453 | 1.00 | 44.75 | H0   |
| ANISOU 3095 HD1 PHE A 201  | 5930    | 6220    | 4850   | 610  | 270   | 1380 |
| ATOM 3096 HD2 PHE A 201    | -29.856 | -23.945 | 37.422 | 1.00 | 46.34 | H0   |
| ANISOU 3096 HD2 PHE A 201  | 5660    | 7120    | 4830   | 740  | 0     | 1380 |
| ATOM 3097 HE1 PHE A 201    | -34.296 | -24.317 | 36.116 | 1.00 | 43.06 | H0   |
| ANISOU 3097 HE1 PHE A 201  | 5660    | 6130    | 4560   | 340  | 240   | 1220 |
| ATOM 3098 HE2 PHE A 201    | -31.405 | -22.344 | 38.083 | 1.00 | 44.57 | H0   |
| ANISOU 3098 HE2 PHE A 201  | 5440    | 6960    | 4540   | 440  | 0     | 1210 |
| ATOM 3099 HZ PHE A 201     | -33.624 | -22.528 | 37.431 | 1.00 | 42.91 | H0   |
| ANISOU 3099 HZ PHE A 201   | 5430    | 6470    | 4410   | 270  | 120   | 1140 |
| ATOM 3100 N ARG A 202      | -29.059 | -26.874 | 38.788 | 1.00 | 51.95 | N0   |
| ANISOU 3100 N ARG A 202    | 6560    | 7750    | 5420   | 1160 | 0     | 1810 |
| ATOM 3101 CA ARG A 202     | -28.884 | -26.581 | 40.234 | 1.00 | 54.01 | C0   |
| ANISOU 3101 CA ARG A 202   | 6750    | 8250    | 5520   | 1160 | -90   | 1880 |



|                            |         |         |        |      |       |      |    |
|----------------------------|---------|---------|--------|------|-------|------|----|
| ATOM 3102 C ARG A 202      | -27.700 | -25.630 | 40.436 | 1.00 | 55.29 | C0   |    |
| ANISOU 3102 C ARG A 202    | 6670    | 8710    | 5620   | 1180 | -190  | 1800 | C0 |
| ATOM 3103 O ARG A 202      | -26.822 | -25.561 | 39.544 | 1.00 | 54.95 | O0   |    |
| ANISOU 3103 O ARG A 202    | 6520    | 8680    | 5670   | 1260 | -190  | 1750 | O0 |
| ATOM 3104 CB ARG A 202     | -28.696 | -27.878 | 41.028 | 1.00 | 56.27 | C0   |    |
| ANISOU 3104 CB ARG A 202   | 7160    | 8500    | 5720   | 1350 | -80   | 2100 | C0 |
| ATOM 3105 CG ARG A 202     | -27.309 | -28.495 | 40.924 | 1.00 | 58.37 | C0   |    |
| ANISOU 3105 CG ARG A 202   | 7340    | 8850    | 5980   | 1610 | -130  | 2210 | C0 |
| ATOM 3106 CD ARG A 202     | -27.185 | -29.765 | 41.750 | 1.00 | 60.69 | C0   |    |
| ANISOU 3106 CD ARG A 202   | 7780    | 9090    | 6180   | 1820 | -120  | 2440 | C0 |
| ATOM 3107 NE ARG A 202     | -25.916 | -30.437 | 41.500 | 1.00 | 62.54 | N0   |    |
| ANISOU 3107 NE ARG A 202   | 7950    | 9380    | 6430   | 2100 | -140  | 2550 | N0 |
| ATOM 3108 CZ ARG A 202     | -25.680 | -31.735 | 41.673 | 1.00 | 64.64 | C0   |    |
| ANISOU 3108 CZ ARG A 202   | 8380    | 9500    | 6690   | 2330 | -90   | 2750 | C0 |
| ATOM 3109 NH1 ARG A 202    | -26.629 | -32.547 | 42.109 | 1.00 | 65.20 | N0   |    |
| ANISOU 3109 NH1 ARG A 202  | 8700    | 9340    | 6730   | 2300 | -10   | 2870 | N0 |
| ATOM 3110 NH2 ARG A 202    | -24.481 | -32.219 | 41.399 | 1.00 | 66.44 | N0   |    |
| ANISOU 3110 NH2 ARG A 202  | 8510    | 9800    | 6940   | 2590 | -120  | 2830 | N0 |
| ATOM 3111 H ARG A 202      | -28.289 | -26.812 | 38.304 | 1.00 | 52.12 | H0   |    |
| ANISOU 3111 H ARG A 202    | 6500    | 7820    | 5490   | 1240 | -10   | 1790 | H0 |
| ATOM 3112 HA ARG A 202     | -29.699 | -26.133 | 40.554 | 1.00 | 53.16 | H0   |    |
| ANISOU 3112 HA ARG A 202   | 6680    | 8140    | 5380   | 1020 | -80   | 1820 | H0 |
| ATOM 3113 HB2 ARG A 202    | -28.887 | -27.693 | 41.972 | 1.00 | 56.86 | H0   |    |
| ANISOU 3113 HB2 ARG A 202  | 7230    | 8700    | 5680   | 1320 | -130  | 2140 | H0 |
| ATOM 3114 HB3 ARG A 202    | -29.355 | -28.531 | 40.714 | 1.00 | 56.14 | H0   |    |
| ANISOU 3114 HB3 ARG A 202  | 7310    | 8270    | 5760   | 1340 | 0     | 2140 | H0 |
| ATOM 3115 HG2 ARG A 202    | -27.117 | -28.704 | 39.985 | 1.00 | 57.83 | H0   |    |
| ANISOU 3115 HG2 ARG A 202  | 7290    | 8660    | 6030   | 1650 | -80   | 2170 | H0 |
| ATOM 3116 HG3 ARG A 202    | -26.640 | -27.850 | 41.234 | 1.00 | 58.58 | H0   |    |
| ANISOU 3116 HG3 ARG A 202  | 7200    | 9110    | 5950   | 1620 | -210  | 2170 | H0 |
| ATOM 3117 HD2 ARG A 202    | -27.252 | -29.541 | 42.703 | 1.00 | 61.35 | H0   |    |
| ANISOU 3117 HD2 ARG A 202  | 7840    | 9330    | 6140   | 1800 | -180  | 2490 | H0 |
| ATOM 3118 HD3 ARG A 202    | -27.925 | -30.367 | 41.526 | 1.00 | 60.48 | H0   |    |
| ANISOU 3118 HD3 ARG A 202  | 7940    | 8840    | 6210   | 1790 | -30   | 2480 | H0 |
| ATOM 3119 HE ARG A 202     | -25.256 | -29.948 | 41.207 | 1.00 | 62.38 | H0   |    |
| ANISOU 3119 HE ARG A 202   | 7770    | 9500    | 6430   | 2120 | -190  | 2480 | H0 |
| ATOM 3120 HH11 ARG A 202   | -27.428 | -32.237 | 42.292 | 1.00 | 64.14 | H0   |    |
| ANISOU 3120 HH11 ARG A 202 | 8620    | 9170    | 6580   | 2130 | 10    | 2810 | H0 |
| ATOM 3121 HH12 ARG A 202   | -26.455 | -33.402 | 42.219 | 1.00 | 66.69 | H0   |    |
| ANISOU 3121 HH12 ARG A 202 | 9010    | 9420    | 6910   | 2460 | 30    | 3000 | H0 |
| ATOM 3122 HH21 ARG A 202   | -23.845 | -31.683 | 41.109 | 1.00 | 66.14 | H0   |    |
| ANISOU 3122 HH21 ARG A 202 | 8300    | 9920    | 6920   | 2600 | -170  | 2750 | H0 |
| ATOM 3123 HH22 ARG A 202   | -24.318 | -33.078 | 41.514 | 1.00 | 67.91 | H0   |    |
| ANISOU 3123 HH22 ARG A 202 | 8810    | 9880    | 7110   | 2760 | -90   | 2970 | H0 |
| ATOM 3124 N LYS A 203      | -27.696 | -24.930 | 41.574 | 1.00 | 56.67 | N0   |    |
| ANISOU 3124 N LYS A 203    | 6750    | 9120    | 5650   | 1100 | -270  | 1790 | N0 |
| ATOM 3125 CA LYS A 203     | -26.574 | -24.077 | 42.050 | 1.00 | 58.68 | C0   |    |
| ANISOU 3125 CA LYS A 203   | 6770    | 9700    | 5820   | 1100 | -380  | 1720 | C0 |
| ATOM 3126 C LYS A 203      | -25.389 | -24.985 | 42.407 | 1.00 | 61.03 | C0   |    |
| ANISOU 3126 C LYS A 203    | 6990    | 10140   | 6050   | 1370 | -450  | 1890 | C0 |
| ATOM 3127 O LYS A 203      | -25.611 | -26.014 | 43.068 | 1.00 | 62.08 | O0   |    |
| ANISOU 3127 O LYS A 203    | 7260    | 10210   | 6110   | 1510 | -440  | 2070 | O0 |
| ATOM 3128 CB LYS A 203     | -27.030 | -23.227 | 43.241 | 1.00 | 59.63 | C0   |    |
| ANISOU 3128 CB LYS A 203   | 6850    | 10020   | 5790   | 940  | -440  | 1670 | C0 |

|                           |                                   |    |
|---------------------------|-----------------------------------|----|
| ATOM 3129 CG LYS A 203    | -26.068 -22.128 43.674 1.00 61.14 | C0 |
| ANISOU 3129 CG LYS A 203  | 6810 10530 5890 870 -530 1550     | C0 |
| ATOM 3130 CD LYS A 203    | -26.739 -21.031 44.482 1.00 61.41 | C0 |
| ANISOU 3130 CD LYS A 203  | 6840 10680 5820 650 -550 1420     | C0 |
| ATOM 3131 CE LYS A 203    | -25.768 -20.186 45.280 1.00 63.25 | C0 |
| ANISOU 3131 CE LYS A 203  | 6860 11260 5910 600 -650 1340     | C0 |
| ATOM 3132 NZ LYS A 203    | -25.386 -20.844 46.553 1.00 65.88 | N0 |
| ANISOU 3132 NZ LYS A 203  | 7160 11820 6050 730 -750 1500     | N0 |
| ATOM 3133 H LYS A 203     | -28.406 -24.939 42.146 1.00 56.60 | H0 |
| ANISOU 3133 H LYS A 203   | 6820 9090 5590 1030 -260 1810     | H0 |
| ATOM 3134 HA LYS A 203    | -26.306 -23.479 41.315 1.00 57.68 | H0 |
| ANISOU 3134 HA LYS A 203  | 6570 9580 5770 1040 -370 1600     | H0 |
| ATOM 3135 HB2 LYS A 203   | -27.889 -22.814 43.012 1.00 58.21 | H0 |
| ANISOU 3135 HB2 LYS A 203 | 6750 9710 5650 810 -390 1580      | H0 |
| ATOM 3136 HB3 LYS A 203   | -27.182 -23.823 44.004 1.00 60.75 | H0 |
| ANISOU 3136 HB3 LYS A 203 | 7060 10180 5840 1020 -460 1790    | H0 |
| ATOM 3137 HG2 LYS A 203   | -25.351 -22.528 44.210 1.00 62.81 | H0 |
| ANISOU 3137 HG2 LYS A 203 | 6950 10910 6010 1000 -600 1640    | H0 |
| ATOM 3138 HG3 LYS A 203   | -25.660 -21.732 42.874 1.00 60.49 | H0 |
| ANISOU 3138 HG3 LYS A 203 | 6660 10430 5900 850 -520 1460     | H0 |
| ATOM 3139 HD2 LYS A 203   | -27.239 -20.447 43.872 1.00 59.78 | H0 |
| ANISOU 3139 HD2 LYS A 203 | 6660 10350 5700 530 -490 1310     | H0 |
| ATOM 3140 HD3 LYS A 203   | -27.382 -21.440 45.100 1.00 61.59 | H0 |
| ANISOU 3140 HD3 LYS A 203 | 6960 10660 5780 660 -540 1500     | H0 |
| ATOM 3141 HE2 LYS A 203   | -24.963 -20.027 44.751 1.00 63.47 | H0 |
| ANISOU 3141 HE2 LYS A 203 | 6770 11360 5980 630 -670 1300     | H0 |
| ATOM 3142 HE3 LYS A 203   | -26.175 -19.322 45.479 1.00 62.52 | H0 |
| ANISOU 3142 HE3 LYS A 203 | 6760 11200 5800 430 -640 1220     | H0 |
| ATOM 3143 HZ1 LYS A 203   | -26.122 -20.971 47.067 1.00 65.62 | H0 |
| ANISOU 3143 HZ1 LYS A 203 | 7230 11730 5970 690 -730 1540     | H0 |
| ATOM 3144 HZ2 LYS A 203   | -24.796 -20.323 47.003 1.00 66.66 | H0 |
| ANISOU 3144 HZ2 LYS A 203 | 7120 12140 6060 690 -810 1440     | H0 |
| ATOM 3145 HZ3 LYS A 203   | -25.001 -21.647 46.381 1.00 66.58 | H0 |
| ANISOU 3145 HZ3 LYS A 203 | 7260 11880 6160 890 -760 1620     | H0 |
| ATOM 3146 N LYS A 204     | -24.186 -24.620 41.955 1.00 62.16 | N0 |
| ANISOU 3146 N LYS A 204   | 6940 10460 6220 1430 -500 1830    | N0 |
| ATOM 3147 CA LYS A 204    | -22.923 -25.371 42.190 1.00 65.21 | C0 |
| ANISOU 3147 CA LYS A 204  | 7200 11030 6550 1700 -560 1960    | C0 |
| ATOM 3148 C LYS A 204     | -22.506 -25.215 43.655 1.00 67.43 | C0 |
| ANISOU 3148 C LYS A 204   | 7370 11640 6620 1740 -690 2040    | C0 |
| ATOM 3149 O LYS A 204     | -22.849 -24.183 44.256 1.00 66.87 | O0 |
| ANISOU 3149 O LYS A 204   | 7230 11710 6460 1520 -730 1920    | O0 |
| ATOM 3150 CB LYS A 204    | -21.834 -24.869 41.237 1.00 65.24 | C0 |
| ANISOU 3150 CB LYS A 204  | 7000 11140 6640 1720 -570 1840    | C0 |
| ATOM 3151 CG LYS A 204    | -21.991 -25.340 39.801 1.00 63.75 | C0 |
| ANISOU 3151 CG LYS A 204  | 6920 10650 6650 1760 -450 1810    | C0 |
| ATOM 3152 CD LYS A 204    | -21.519 -24.343 38.778 1.00 62.60 | C0 |
| ANISOU 3152 CD LYS A 204  | 6630 10550 6600 1620 -430 1610    | C0 |
| ATOM 3153 CE LYS A 204    | -20.033 -24.084 38.830 1.00 64.24 | C0 |
| ANISOU 3153 CE LYS A 204  | 6560 11080 6760 1720 -500 1590    | C0 |
| ATOM 3154 NZ LYS A 204    | -19.574 -23.394 37.601 1.00 63.19 | N0 |
| ANISOU 3154 NZ LYS A 204  | 6330 10930 6750 1620 -440 1420    | N0 |
| ATOM 3155 H LYS A 204     | -24.067 -23.863 41.462 1.00 61.16 | H0 |
| ANISOU 3155 H LYS A 204   | 6730 10360 6140 1320 -490 1690    | H0 |

|        |      |     |     |   |     |         |         |        |      |       |       |    |
|--------|------|-----|-----|---|-----|---------|---------|--------|------|-------|-------|----|
| ATOM   | 3156 | HA  | LYS | A | 204 | -23.090 | -26.324 | 42.009 | 1.00 | 65.68 | H0    |    |
| ANISOU | 3156 | HA  | LYS | A | 204 | 7390    | 10910   | 6650   | 1840 | -510  | 2090  | H0 |
| ATOM   | 3157 | HB2 | LYS | A | 204 | -21.834 | -23.889 | 41.250 | 1.00 | 64.31 | H0    |    |
| ANISOU | 3157 | HB2 | LYS | A | 204 | 6790    | 11140   | 6510   | 1540 | -590  | 1700  | H0 |
| ATOM   | 3158 | HB3 | LYS | A | 204 | -20.964 | -25.173 | 41.572 | 1.00 | 66.93 | H0    |    |
| ANISOU | 3158 | HB3 | LYS | A | 204 | 7090    | 11550   | 6790   | 1870 | -630  | 1910  | H0 |
| ATOM   | 3159 | HG2 | LYS | A | 204 | -21.488 | -26.174 | 39.687 | 1.00 | 65.16 | H0    |    |
| ANISOU | 3159 | HG2 | LYS | A | 204 | 7110    | 10810   | 6840   | 1960 | -450  | 1920  | H0 |
| ATOM   | 3160 | HG3 | LYS | A | 204 | -22.938 | -25.538 | 39.636 | 1.00 | 62.69 | H0    |    |
| ANISOU | 3160 | HG3 | LYS | A | 204 | 6960    | 10300   | 6560   | 1690 | -390  | 1820  | H0 |
| ATOM   | 3161 | HD2 | LYS | A | 204 | -21.750 | -24.672 | 37.883 | 1.00 | 61.69 | H0    |    |
| ANISOU | 3161 | HD2 | LYS | A | 204 | 6610    | 10230   | 6600   | 1640 | -350  | 1600  | H0 |
| ATOM   | 3162 | HD3 | LYS | A | 204 | -21.992 | -23.495 | 38.917 | 1.00 | 61.36 | H0    |    |
| ANISOU | 3162 | HD3 | LYS | A | 204 | 6470    | 10420   | 6430   | 1430 | -430  | 1510  | H0 |
| ATOM   | 3163 | HE2 | LYS | A | 204 | -19.822 | -23.530 | 39.605 | 1.00 | 64.88 | H0    |    |
| ANISOU | 3163 | HE2 | LYS | A | 204 | 6530    | 11390   | 6730   | 1650 | -580  | 1560  | H0 |
| ATOM   | 3164 | HE3 | LYS | A | 204 | -19.554 | -24.930 | 38.920 | 1.00 | 65.76 | H0    |    |
| ANISOU | 3164 | HE3 | LYS | A | 204 | 6750    | 11300   | 6940   | 1930 | -520  | 1710  | H0 |
| ATOM   | 3165 | HZ1 | LYS | A | 204 | -19.718 | -23.924 | 36.879 | 1.00 | 62.75 | H0    |    |
| ANISOU | 3165 | HZ1 | LYS | A | 204 | 6370    | 10680   | 6790   | 1690 | -380  | 1450  | H0 |
| ATOM   | 3166 | HZ2 | LYS | A | 204 | -18.688 | -23.212 | 37.664 | 1.00 | 64.33 | H0    |    |
| ANISOU | 3166 | HZ2 | LYS | A | 204 | 6300    | 11280   | 6860   | 1660 | -490  | 1400  | H0 |
| ATOM   | 3167 | HZ3 | LYS | A | 204 | -20.030 | -22.617 | 37.496 | 1.00 | 61.87 | H0    |    |
| ANISOU | 3167 | HZ3 | LYS | A | 204 | 6180    | 10730   | 6600   | 1430 | -430  | 1310  | H0 |
| ATOM   | 3168 | N   | GLY | A | 205 | -21.801 | -26.211 | 44.199 | 1.00 | 71.04 | N0    |    |
| ANISOU | 3168 | N   | GLY | A | 205 | 7810    | 12200   | 6980   | 2010 | -740  | 2240  | N0 |
| ATOM   | 3169 | CA  | GLY | A | 205 | -21.337 | -26.234 | 45.602 | 1.00 | 73.64 | C0    |    |
| ANISOU | 3169 | CA  | GLY | A | 205 | 8030    | 12860   | 7090   | 2090 | -870  | 2340  | C0 |
| ATOM   | 3170 | C   | GLY | A | 205 | -20.056 | -27.033 | 45.765 | 1.00 | 76.89 | C0    |    |
| ANISOU | 3170 | C   | GLY | A | 205 | 8310    | 13470   | 7440   | 2410 | -940  | 2500  | C0 |
| ATOM   | 3171 | O   | GLY | A | 205 | -19.625 | -27.291 | 46.895 | 1.00 | 80.36 | O0    |    |
| ANISOU | 3171 | O   | GLY | A | 205 | 8680    | 14170   | 7690   | 2540 | -1050 | 2630  | O0 |
| ATOM   | 3172 | H   | GLY | A | 205 | -21.565 | -26.950 | 43.720 | 1.00 | 71.36 | H0    |    |
| ANISOU | 3172 | H   | GLY | A | 205 | 7900    | 12110   | 7100   | 2170 | -700  | 2320  | H0 |
| ATOM   | 3173 | HA2 | GLY | A | 205 | -21.184 | -25.305 | 45.907 | 1.00 | 73.33 | H0    |    |
| ANISOU | 3173 | HA2 | GLY | A | 205 | 7850    | 13020   | 6990   | 1930 | -920  | 2210  | H0 |
| ATOM   | 3174 | HA3 | GLY | A | 205 | -22.045 | -26.631 | 46.168 | 1.00 | 73.79 | H0    |    |
| ANISOU | 3174 | HA3 | GLY | A | 205 | 8210    | 12770   | 7050   | 2090 | -850  | 2440  | H0 |
| TER    | 3175 |     | GLY | A | 205 |         |         |        |      |       |       |    |
| ATOM   | 3176 | N   | ALA | B | 1   | -54.472 | -18.269 | -6.258 | 1.00 | 85.61 | N0    |    |
| ANISOU | 3176 | N   | ALA | B | 1   | 14480   | 11430   | 6620   | -200 | -1120 | -2230 | N0 |
| ATOM   | 3177 | CA  | ALA | B | 1   | -54.251 | -19.712 | -6.590 | 1.00 | 88.31 | C0    |    |
| ANISOU | 3177 | CA  | ALA | B | 1   | 15190   | 11540   | 6820   | -240 | -1100 | -2420 | C0 |
| ATOM   | 3178 | C   | ALA | B | 1   | -53.327 | -20.377 | -5.556 | 1.00 | 87.05 | C0    |    |
| ANISOU | 3178 | C   | ALA | B | 1   | 15030   | 11190   | 6850   | -180 | -860  | -2390 | C0 |
| ATOM   | 3179 | O   | ALA | B | 1   | -53.454 | -21.606 | -5.376 | 1.00 | 90.14 | O0    |    |
| ANISOU | 3179 | O   | ALA | B | 1   | 15650   | 11370   | 7230   | -290 | -880  | -2540 | O0 |
| ATOM   | 3180 | CB  | ALA | B | 1   | -53.698 | -19.842 | -7.990 | 1.00 | 90.63 | C0    |    |
| ANISOU | 3180 | CB  | ALA | B | 1   | 15820   | 11840   | 6770   | -50  | -1050 | -2490 | C0 |
| ATOM   | 3181 | H   | ALA | B | 1   | -53.751 | -17.777 | -6.520 | 1.00 | 85.22 | H0    |    |
| ANISOU | 3181 | H   | ALA | B | 1   | 14440   | 11420   | 6510   | -30  | -980  | -2130 | H0 |
| ATOM   | 3182 | HA  | ALA | B | 1   | -55.123 | -20.170 | -6.558 | 1.00 | 89.36 | H0    |    |
| ANISOU | 3182 | HA  | ALA | B | 1   | 15330   | 11650   | 6970   | -440 | -1280 | -2540 | H0 |
| ATOM   | 3183 | HB1 | ALA | B | 1   | -53.781 | -20.764 | -8.287 | 1.00 | 92.50 | H0    |    |

|        |      |     |     |   |   |         |         |        |      |       |       |    |
|--------|------|-----|-----|---|---|---------|---------|--------|------|-------|-------|----|
| ANISOU | 3183 | HB1 | ALA | B | 1 | 16310   | 11940   | 6900   | -100 | -1090 | -2640 | H0 |
| ATOM   | 3184 | HB2 | ALA | B | 1 | -54.195 | -19.263 | -8.591 | 1.00 | 91.34 |       | H0 |
| ANISOU | 3184 | HB2 | ALA | B | 1 | 15880   | 12070   | 6750   | -50  | -1180 | -2480 | H0 |
| ATOM   | 3185 | HB3 | ALA | B | 1 | -52.761 | -19.586 | -7.995 | 1.00 | 89.81 |       | H0 |
| ANISOU | 3185 | HB3 | ALA | B | 1 | 15730   | 11730   | 6660   | 140  | -840  | -2390 | H0 |
| ATOM   | 3186 | N   | ASP | B | 2 | -52.426 | -19.614 | -4.922 | 1.00 | 83.72 |       | N0 |
| ANISOU | 3186 | N   | ASP | B | 2 | 14390   | 10830   | 6580   | -10  | -650  | -2190 | N0 |
| ATOM   | 3187 | CA  | ASP | B | 2 | -51.529 | -20.091 | -3.829 | 1.00 | 81.25 |       | C0 |
| ANISOU | 3187 | CA  | ASP | B | 2 | 14030   | 10380   | 6460   | 60   | -430  | -2130 | C0 |
| ATOM   | 3188 | C   | ASP | B | 2 | -51.290 | -18.951 | -2.826 | 1.00 | 76.76 |       | C0 |
| ANISOU | 3188 | C   | ASP | B | 2 | 13070   | 9950    | 6150   | 80   | -360  | -1920 | C0 |
| ATOM   | 3189 | O   | ASP | B | 2 | -51.787 | -17.834 | -3.071 | 1.00 | 76.40 |       | O0 |
| ANISOU | 3189 | O   | ASP | B | 2 | 12830   | 10090   | 6100   | 50   | -460  | -1830 | O0 |
| ATOM   | 3190 | CB  | ASP | B | 2 | -50.221 | -20.664 | -4.390 | 1.00 | 82.91 |       | C0 |
| ANISOU | 3190 | CB  | ASP | B | 2 | 14510   | 10490   | 6500   | 320  | -190  | -2150 | C0 |
| ATOM   | 3191 | CG  | ASP | B | 2 | -49.330 | -19.659 | -5.106 | 1.00 | 82.76 |       | C0 |
| ANISOU | 3191 | CG  | ASP | B | 2 | 14440   | 10640   | 6360   | 560  | -30   | -2000 | C0 |
| ATOM   | 3192 | OD1 | ASP | B | 2 | -49.600 | -18.446 | -5.000 | 1.00 | 81.50 |       | O0 |
| ANISOU | 3192 | OD1 | ASP | B | 2 | 14010   | 10670   | 6290   | 530  | -80   | -1860 | O0 |
| ATOM   | 3193 | OD2 | ASP | B | 2 | -48.365 | -20.100 | -5.761 | 1.00 | 84.34 |       | O0 |
| ANISOU | 3193 | OD2 | ASP | B | 2 | 14870   | 10790   | 6380   | 780  | 160   | -2020 | O0 |
| ATOM   | 3194 | H   | ASP | B | 2 | -52.293 | -18.740 | -5.136 | 1.00 | 82.88 |       | H0 |
| ANISOU | 3194 | H   | ASP | B | 2 | 14160   | 10870   | 6460   | 60   | -630  | -2090 | H0 |
| ATOM   | 3195 | HA  | ASP | B | 2 | -51.994 | -20.820 | -3.355 | 1.00 | 81.59 |       | H0 |
| ANISOU | 3195 | HA  | ASP | B | 2 | 14120   | 10300   | 6580   | -90  | -500  | -2220 | H0 |
| ATOM   | 3196 | HB2 | ASP | B | 2 | -49.707 | -21.055 | -3.655 | 1.00 | 82.00 |       | H0 |
| ANISOU | 3196 | HB2 | ASP | B | 2 | 14370   | 10280   | 6520   | 370  | -70   | -2110 | H0 |
| ATOM   | 3197 | HB3 | ASP | B | 2 | -50.437 | -21.379 | -5.022 | 1.00 | 84.95 |       | H0 |
| ANISOU | 3197 | HB3 | ASP | B | 2 | 15040   | 10640   | 6590   | 300  | -250  | -2290 | H0 |
| ATOM   | 3198 | N   | ARG | B | 3 | -50.562 | -19.227 | -1.738 | 1.00 | 73.40 |       | N0 |
| ANISOU | 3198 | N   | ARG | B | 3 | 12540   | 9440    | 5910   | 130  | -190  | -1850 | N0 |
| ATOM   | 3199 | CA  | ARG | B | 3 | -50.318 | -18.271 | -0.622 | 1.00 | 69.34 |       | C0 |
| ANISOU | 3199 | CA  | ARG | B | 3 | 11670   | 9030    | 5650   | 130  | -120  | -1670 | C0 |
| ATOM   | 3200 | C   | ARG | B | 3 | -49.609 | -17.018 | -1.156 | 1.00 | 66.36 |       | C0 |
| ANISOU | 3200 | C   | ARG | B | 3 | 11180   | 8830    | 5210   | 300  | -20   | -1510 | C0 |
| ATOM   | 3201 | O   | ARG | B | 3 | -49.977 | -15.915 | -0.724 | 1.00 | 63.16 |       | O0 |
| ANISOU | 3201 | O   | ARG | B | 3 | 10510   | 8550    | 4930   | 240  | -70   | -1400 | O0 |
| ATOM   | 3202 | CB  | ARG | B | 3 | -49.514 | -18.938 | 0.500  | 1.00 | 69.23 |       | C0 |
| ANISOU | 3202 | CB  | ARG | B | 3 | 11630   | 8870    | 5800   | 190  | 40    | -1630 | C0 |
| ATOM   | 3203 | CG  | ARG | B | 3 | -50.313 | -19.938 | 1.324  | 1.00 | 70.26 |       | C0 |
| ANISOU | 3203 | CG  | ARG | B | 3 | 11810   | 8840    | 6050   | -10  | -60   | -1740 | C0 |
| ATOM   | 3204 | CD  | ARG | B | 3 | -49.494 | -20.585 | 2.425  | 1.00 | 70.02 |       | C0 |
| ANISOU | 3204 | CD  | ARG | B | 3 | 11770   | 8670    | 6160   | 70   | 100   | -1690 | C0 |
| ATOM   | 3205 | NE  | ARG | B | 3 | -50.227 | -21.638 | 3.120  | 1.00 | 71.17 |       | N0 |
| ANISOU | 3205 | NE  | ARG | B | 3 | 12020   | 8630    | 6390   | -120 | 20    | -1790 | N0 |
| ATOM   | 3206 | CZ  | ARG | B | 3 | -50.431 | -22.872 | 2.657  | 1.00 | 74.57 |       | C0 |
| ANISOU | 3206 | CZ  | ARG | B | 3 | 12790   | 8850    | 6700   | -160 | -10   | -1950 | C0 |
| ATOM   | 3207 | NH1 | ARG | B | 3 | -49.965 | -23.241 | 1.474  | 1.00 | 76.63 |       | N0 |
| ANISOU | 3207 | NH1 | ARG | B | 3 | 13320   | 9070    | 6720   | -20  | 40    | -2040 | N0 |
| ATOM   | 3208 | NH2 | ARG | B | 3 | -51.116 | -23.739 | 3.383  | 1.00 | 75.72 |       | N0 |
| ANISOU | 3208 | NH2 | ARG | B | 3 | 13000   | 8830    | 6940   | -360 | -70   | -2020 | N0 |
| ATOM   | 3209 | H   | ARG | B | 3 | -50.170 | -20.039 | -1.612 | 1.00 | 74.24 |       | H0 |
| ANISOU | 3209 | H   | ARG | B | 3 | 12800   | 9410    | 6000   | 170  | -110  | -1910 | H0 |
| ATOM   | 3210 | HA  | ARG | B | 3 | -51.193 | -17.999 | -0.258 | 1.00 | 68.69 |       | H0 |

|                          |         |         |        |      |       |       |    |
|--------------------------|---------|---------|--------|------|-------|-------|----|
| ANISOU 3210 HA ARG B 3   | 11450   | 8990    | 5660   | -20  | -260  | -1670 | H0 |
| ATOM 3211 HB2 ARG B 3    | -48.744 | -19.398 | 0.103  | 1.00 | 70.20 |       | H0 |
| ANISOU 3211 HB2 ARG B 3  | 11920   | 8940    | 5820   | 340  | 170   | -1650 | H0 |
| ATOM 3212 HB3 ARG B 3    | -49.171 | -18.240 | 1.097  | 1.00 | 67.51 |       | H0 |
| ANISOU 3212 HB3 ARG B 3  | 11200   | 8740    | 5710   | 220  | 100   | -1510 | H0 |
| ATOM 3213 HG2 ARG B 3    | -51.082 | -19.481 | 1.728  | 1.00 | 69.31 |       | H0 |
| ANISOU 3213 HG2 ARG B 3  | 11510   | 8790    | 6030   | -150 | -180  | -1710 | H0 |
| ATOM 3214 HG3 ARG B 3    | -50.658 | -20.639 | 0.732  | 1.00 | 72.01 |       | H0 |
| ANISOU 3214 HG3 ARG B 3  | 12250   | 8970    | 6140   | -60  | -130  | -1860 | H0 |
| ATOM 3215 HD2 ARG B 3    | -48.674 | -20.960 | 2.041  | 1.00 | 70.87 |       | H0 |
| ANISOU 3215 HD2 ARG B 3  | 12030   | 8730    | 6170   | 240  | 230   | -1690 | H0 |
| ATOM 3216 HD3 ARG B 3    | -49.233 | -19.898 | 3.074  | 1.00 | 68.22 |       | H0 |
| ANISOU 3216 HD3 ARG B 3  | 11320   | 8530    | 6070   | 100  | 150   | -1570 | H0 |
| ATOM 3217 HE ARG B 3     | -50.557 | -21.447 | 3.904  | 1.00 | 70.18 |       | H0 |
| ANISOU 3217 HE ARG B 3   | 11740   | 8520    | 6410   | -210 | -10   | -1740 | H0 |
| ATOM 3218 HH11 ARG B 3   | -49.510 | -22.677 | 0.980  | 1.00 | 76.35 |       | H0 |
| ANISOU 3218 HH11 ARG B 3 | 13240   | 9150    | 6610   | 110  | 90    | -1980 | H0 |
| ATOM 3219 HH12 ARG B 3   | -50.110 | -24.058 | 1.184  | 1.00 | 78.26 |       | H0 |
| ANISOU 3219 HH12 ARG B 3 | 13770   | 9130    | 6840   | -50  | 20    | -2150 | H0 |
| ATOM 3220 HH21 ARG B 3   | -51.430 | -23.501 | 4.171  | 1.00 | 74.20 |       | H0 |
| ANISOU 3220 HH21 ARG B 3 | 12630   | 8660    | 6900   | -450 | -100  | -1960 | H0 |
| ATOM 3221 HH22 ARG B 3   | -51.253 | -24.555 | 3.080  | 1.00 | 77.15 |       | H0 |
| ANISOU 3221 HH22 ARG B 3 | 13420   | 8860    | 7040   | -400 | -90   | -2130 | H0 |
| ATOM 3222 N ALA B 4      | -48.645 | -17.187 | -2.068 | 1.00 | 66.60 |       | N0 |
| ANISOU 3222 N ALA B 4    | 11400   | 8860    | 5050   | 500  | 140   | -1510 | N0 |
| ATOM 3223 CA ALA B 4     | -47.886 | -16.088 | -2.711 | 1.00 | 65.00 |       | C0 |
| ANISOU 3223 CA ALA B 4   | 11130   | 8810    | 4760   | 660  | 270   | -1360 | C0 |
| ATOM 3224 C ALA B 4      | -48.867 | -15.100 | -3.352 | 1.00 | 63.91 |       | C0 |
| ANISOU 3224 C ALA B 4    | 10930   | 8810    | 4540   | 570  | 90    | -1340 | C0 |
| ATOM 3225 O ALA B 4      | -48.803 | -13.898 | -3.014 | 1.00 | 62.46 |       | O0 |
| ANISOU 3225 O ALA B 4    | 10510   | 8750    | 4470   | 570  | 110   | -1180 | O0 |
| ATOM 3226 CB ALA B 4     | -46.915 | -16.646 | -3.721 | 1.00 | 67.43 |       | C0 |
| ANISOU 3226 CB ALA B 4   | 11700   | 9090    | 4830   | 870  | 450   | -1400 | C0 |
| ATOM 3227 H ALA B 4      | -48.377 | -18.008 | -2.359 | 1.00 | 67.84 |       | H0 |
| ANISOU 3227 H ALA B 4    | 11760   | 8910    | 5110   | 560  | 190   | -1600 | H0 |
| ATOM 3228 HA ALA B 4     | -47.377 | -15.612 | -2.013 | 1.00 | 63.54 |       | H0 |
| ANISOU 3228 HA ALA B 4   | 10750   | 8670    | 4730   | 680  | 370   | -1240 | H0 |
| ATOM 3229 HB1 ALA B 4    | -46.460 | -15.915 | -4.172 | 1.00 | 67.43 |       | H0 |
| ANISOU 3229 HB1 ALA B 4  | 11650   | 9200    | 4770   | 960  | 540   | -1300 | H0 |
| ATOM 3230 HB2 ALA B 4    | -46.260 | -17.204 | -3.268 | 1.00 | 67.25 |       | H0 |
| ANISOU 3230 HB2 ALA B 4  | 11690   | 8990    | 4870   | 950  | 580   | -1400 | H0 |
| ATOM 3231 HB3 ALA B 4    | -47.396 | -17.179 | -4.375 | 1.00 | 68.98 |       | H0 |
| ANISOU 3231 HB3 ALA B 4  | 12110   | 9230    | 4870   | 850  | 360   | -1520 | H0 |
| ATOM 3232 N ASP B 5      | -49.760 | -15.605 | -4.209 | 1.00 | 64.55 |       | N0 |
| ANISOU 3232 N ASP B 5    | 11220   | 8870    | 4430   | 500  | -90   | -1490 | N0 |
| ATOM 3233 CA ASP B 5     | -50.823 | -14.816 | -4.892 | 1.00 | 64.63 |       | C0 |
| ANISOU 3233 CA ASP B 5   | 11200   | 9020    | 4330   | 420  | -310  | -1490 | C0 |
| ATOM 3234 C ASP B 5      | -51.627 | -14.016 | -3.856 | 1.00 | 61.77 |       | C0 |
| ANISOU 3234 C ASP B 5    | 10510   | 8740    | 4230   | 280  | -430  | -1400 | C0 |
| ATOM 3235 O ASP B 5      | -51.815 | -12.811 | -4.076 | 1.00 | 61.38 |       | O0 |
| ANISOU 3235 O ASP B 5    | 10320   | 8820    | 4170   | 320  | -470  | -1270 | O0 |
| ATOM 3236 CB ASP B 5     | -51.743 | -15.713 | -5.727 | 1.00 | 67.26 |       | C0 |
| ANISOU 3236 CB ASP B 5   | 11780   | 9310    | 4460   | 320  | -520  | -1700 | C0 |
| ATOM 3237 CG ASP B 5     | -51.065 | -16.387 | -6.910 | 1.00 | 70.10 |       | C0 |

|        |      |      |     |   |   |         |         |        |      |       |       |    |
|--------|------|------|-----|---|---|---------|---------|--------|------|-------|-------|----|
| ANISOU | 3237 | CG   | ASP | B | 5 | 12510   | 9600    | 4520   | 480  | -420  | -1790 | C0 |
| ATOM   | 3238 | OD1  | ASP | B | 5 | -49.878 | -16.086 | -7.161 | 1.00 | 69.81 |       | O0 |
| ANISOU | 3238 | OD1  | ASP | B | 5 | 12510   | 9590    | 4430   | 690  | -170  | -1680 | O0 |
| ATOM   | 3239 | OD2  | ASP | B | 5 | -51.732 | -17.214 | -7.571 | 1.00 | 72.77 |       | O0 |
| ANISOU | 3239 | OD2  | ASP | B | 5 | 13090   | 9880    | 4680   | 400  | -580  | -1980 | O0 |
| ATOM   | 3240 | H    | ASP | B | 5 | -49.771 | -16.489 | -4.428 | 1.00 | 65.96 |       | H0 |
| ANISOU | 3240 | H    | ASP | B | 5 | 11580   | 8950    | 4530   | 500  | -100  | -1610 | H0 |
| ATOM   | 3241 | HA   | ASP | B | 5 | -50.383 | -14.178 | -5.502 | 1.00 | 64.97 |       | H0 |
| ANISOU | 3241 | HA   | ASP | B | 5 | 11270   | 9150    | 4270   | 540  | -230  | -1400 | H0 |
| ATOM   | 3242 | HB2  | ASP | B | 5 | -52.117 | -16.409 | -5.151 | 1.00 | 67.21 |       | H0 |
| ANISOU | 3242 | HB2  | ASP | B | 5 | 11770   | 9210    | 4560   | 200  | -580  | -1780 | H0 |
| ATOM   | 3243 | HB3  | ASP | B | 5 | -52.484 | -15.173 | -6.069 | 1.00 | 67.69 |       | H0 |
| ANISOU | 3243 | HB3  | ASP | B | 5 | 11780   | 9470    | 4470   | 270  | -680  | -1690 | H0 |
| ATOM   | 3244 | N    | ILE | B | 6 | -52.074 | -14.652 | -2.766 | 1.00 | 59.90 |       | N0 |
| ANISOU | 3244 | N    | ILE | B | 6 | 10160   | 8410    | 4190   | 120  | -490  | -1460 | N0 |
| ATOM   | 3245 | CA   | ILE | B | 6 | -52.946 | -14.022 | -1.723 | 1.00 | 57.86 |       | C0 |
| ANISOU | 3245 | CA   | ILE | B | 6 | 9600    | 8220    | 4170   | -20  | -610  | -1400 | C0 |
| ATOM   | 3246 | C    | ILE | B | 6 | -52.198 | -12.857 | -1.054 | 1.00 | 55.43 |       | C0 |
| ANISOU | 3246 | C    | ILE | B | 6 | 9070    | 7970    | 4010   | 80   | -450  | -1200 | C0 |
| ATOM   | 3247 | O    | ILE | B | 6 | -52.829 | -11.788 | -0.821 | 1.00 | 53.42 |       | O0 |
| ANISOU | 3247 | O    | ILE | B | 6 | 8630    | 7830    | 3840   | 50   | -550  | -1110 | O0 |
| ATOM   | 3248 | CB   | ILE | B | 6 | -53.423 | -15.055 | -0.682 | 1.00 | 57.29 |       | C0 |
| ANISOU | 3248 | CB   | ILE | B | 6 | 9480    | 8010    | 4270   | -200 | -660  | -1500 | C0 |
| ATOM   | 3249 | CG1  | ILE | B | 6 | -54.350 | -16.103 | -1.306 | 1.00 | 59.87 |       | C0 |
| ANISOU | 3249 | CG1  | ILE | B | 6 | 10000   | 8280    | 4460   | -350 | -850  | -1690 | C0 |
| ATOM   | 3250 | CG2  | ILE | B | 6 | -54.082 | -14.357 | 0.500  | 1.00 | 55.17 |       | C0 |
| ANISOU | 3250 | CG2  | ILE | B | 6 | 8900    | 7820    | 4250   | -310 | -720  | -1410 | C0 |
| ATOM   | 3251 | CD1  | ILE | B | 6 | -54.574 | -17.319 | -0.439 | 1.00 | 60.37 |       | C0 |
| ANISOU | 3251 | CD1  | ILE | B | 6 | 10110   | 8170    | 4660   | -510 | -850  | -1800 | C0 |
| ATOM   | 3252 | H    | ILE | B | 6 | -51.867 | -15.521 | -2.589 | 1.00 | 60.48 |       | H0 |
| ANISOU | 3252 | H    | ILE | B | 6 | 10340   | 8370    | 4270   | 100  | -450  | -1540 | H0 |
| ATOM   | 3253 | HA   | ILE | B | 6 | -53.733 | -13.660 | -2.169 | 1.00 | 58.59 |       | H0 |
| ANISOU | 3253 | HA   | ILE | B | 6 | 9660    | 8400    | 4200   | -70  | -760  | -1420 | H0 |
| ATOM   | 3254 | HB   | ILE | B | 6 | -52.623 | -15.528 | -0.344 | 1.00 | 56.91 |       | H0 |
| ANISOU | 3254 | HB   | ILE | B | 6 | 9500    | 7860    | 4260   | -140 | -510  | -1490 | H0 |
| ATOM   | 3255 | HG12 | ILE | B | 6 | -55.218 | -15.684 | -1.491 | 1.00 | 60.32 |       | H0 |
| ANISOU | 3255 | HG12 | ILE | B | 6 | 9960    | 8450    | 4510   | -430 | -1010 | -1700 | H0 |
| ATOM   | 3256 | HG13 | ILE | B | 6 | -53.969 | -16.393 | -2.161 | 1.00 | 61.32 |       | H0 |
| ANISOU | 3256 | HG13 | ILE | B | 6 | 10400   | 8440    | 4470   | -270 | -820  | -1750 | H0 |
| ATOM   | 3257 | HG21 | ILE | B | 6 | -53.401 | -13.945 | 1.059  | 1.00 | 53.73 |       | H0 |
| ANISOU | 3257 | HG21 | ILE | B | 6 | 8620    | 7630    | 4170   | -230 | -590  | -1300 | H0 |
| ATOM   | 3258 | HG22 | ILE | B | 6 | -54.580 | -15.004 | 1.028  | 1.00 | 55.32 |       | H0 |
| ANISOU | 3258 | HG22 | ILE | B | 6 | 8900    | 7770    | 4350   | -440 | -780  | -1480 | H0 |
| ATOM   | 3259 | HG23 | ILE | B | 6 | -54.691 | -13.671 | 0.175  | 1.00 | 55.43 |       | H0 |
| ANISOU | 3259 | HG23 | ILE | B | 6 | 8840    | 7970    | 4250   | -320 | -830  | -1370 | H0 |
| ATOM   | 3260 | HD11 | ILE | B | 6 | -53.718 | -17.730 | -0.227 | 1.00 | 59.90 |       | H0 |
| ANISOU | 3260 | HD11 | ILE | B | 6 | 10150   | 8000    | 4610   | -420 | -690  | -1780 | H0 |
| ATOM   | 3261 | HD12 | ILE | B | 6 | -55.130 | -17.960 | -0.914 | 1.00 | 62.04 |       | H0 |
| ANISOU | 3261 | HD12 | ILE | B | 6 | 10460   | 8340    | 4770   | -620 | -970  | -1920 | H0 |
| ATOM   | 3262 | HD13 | ILE | B | 6 | -55.018 | -17.057 | 0.385  | 1.00 | 59.04 |       | H0 |
| ANISOU | 3262 | HD13 | ILE | B | 6 | 9740    | 8030    | 4660   | -600 | -880  | -1750 | H0 |
| ATOM   | 3263 | N    | LEU | B | 7 | -50.915 | -13.055 | -0.735 | 1.00 | 55.24 |       | N0 |
| ANISOU | 3263 | N    | LEU | B | 7 | 9080    | 7880    | 4030   | 190  | -230  | -1140 | N0 |
| ATOM   | 3264 | CA   | LEU | B | 7 | -50.064 | -12.023 | -0.087 | 1.00 | 54.71 |       | C0 |

|                          |         |         |        |      |       |       |    |
|--------------------------|---------|---------|--------|------|-------|-------|----|
| ANISOU 3264 CA LEU B 7   | 8810    | 7860    | 4110   | 270  | -80   | -960  | C0 |
| ATOM 3265 C LEU B 7      | -49.821 | -10.869 | -1.071 | 1.00 | 55.75 |       | C0 |
| ANISOU 3265 C LEU B 7    | 8970    | 8120    | 4100   | 370  | -40   | -850  | C0 |
| ATOM 3266 O LEU B 7      | -49.803 | -9.719  | -0.625 | 1.00 | 54.59 |       | O0 |
| ANISOU 3266 O LEU B 7    | 8640    | 8030    | 4070   | 370  | -30   | -710  | O0 |
| ATOM 3267 CB LEU B 7     | -48.762 | -12.677 | 0.392  | 1.00 | 55.20 |       | C0 |
| ANISOU 3267 CB LEU B 7   | 8900    | 7840    | 4230   | 360  | 140   | -940  | C0 |
| ATOM 3268 CG LEU B 7     | -47.887 | -11.864 | 1.352  | 1.00 | 54.13 |       | C0 |
| ANISOU 3268 CG LEU B 7   | 8540    | 7740    | 4290   | 400  | 280   | -780  | C0 |
| ATOM 3269 CD1 LEU B 7    | -46.845 | -11.056 | 0.595  | 1.00 | 55.44 |       | C0 |
| ANISOU 3269 CD1 LEU B 7  | 8710    | 8000    | 4350   | 530  | 440   | -650  | C0 |
| ATOM 3270 CD2 LEU B 7    | -48.708 | -10.952 | 2.256  | 1.00 | 52.74 |       | C0 |
| ANISOU 3270 CD2 LEU B 7  | 8140    | 7610    | 4290   | 270  | 160   | -720  | C0 |
| ATOM 3271 H LEU B 7      | -50.483 | -13.842 | -0.896 | 1.00 | 56.18 |       | H0 |
| ANISOU 3271 H LEU B 7    | 9340    | 7910    | 4090   | 230  | -160  | -1210 | H0 |
| ATOM 3272 HA LEU B 7     | -50.557 | -11.671 | 0.688  | 1.00 | 53.48 |       | H0 |
| ANISOU 3272 HA LEU B 7   | 8490    | 7720    | 4110   | 180  | -140  | -930  | H0 |
| ATOM 3273 HB2 LEU B 7    | -48.992 | -13.520 | 0.832  | 1.00 | 55.20 |       | H0 |
| ANISOU 3273 HB2 LEU B 7  | 8940    | 7750    | 4280   | 310  | 110   | -1030 | H0 |
| ATOM 3274 HB3 LEU B 7    | -48.228 | -12.900 | -0.397 | 1.00 | 56.43 |       | H0 |
| ANISOU 3274 HB3 LEU B 7  | 9200    | 8000    | 4240   | 470  | 220   | -950  | H0 |
| ATOM 3275 HG LEU B 7     | -47.405 | -12.505 | 1.932  | 1.00 | 53.84 |       | H0 |
| ANISOU 3275 HG LEU B 7   | 8490    | 7640    | 4330   | 420  | 350   | -800  | H0 |
| ATOM 3276 HD11 LEU B 7   | -46.403 | -11.625 | -0.060 | 1.00 | 56.57 |       | H0 |
| ANISOU 3276 HD11 LEU B 7 | 9010    | 8130    | 4360   | 630  | 520   | -700  | H0 |
| ATOM 3277 HD12 LEU B 7   | -46.186 | -10.712 | 1.221  | 1.00 | 54.33 |       | H0 |
| ANISOU 3277 HD12 LEU B 7 | 8440    | 7880    | 4330   | 550  | 540   | -570  | H0 |
| ATOM 3278 HD13 LEU B 7   | -47.277 | -10.313 | 0.140  | 1.00 | 55.45 |       | H0 |
| ANISOU 3278 HD13 LEU B 7 | 8710    | 8060    | 4300   | 520  | 380   | -610  | H0 |
| ATOM 3279 HD21 LEU B 7   | -49.047 | -10.200 | 1.742  | 1.00 | 52.89 |       | H0 |
| ANISOU 3279 HD21 LEU B 7 | 8150    | 7700    | 4250   | 280  | 100   | -670  | H0 |
| ATOM 3280 HD22 LEU B 7   | -48.146 | -10.621 | 2.978  | 1.00 | 51.52 |       | H0 |
| ANISOU 3280 HD22 LEU B 7 | 7860    | 7460    | 4260   | 280  | 240   | -640  | H0 |
| ATOM 3281 HD23 LEU B 7   | -49.454 | -11.451 | 2.632  | 1.00 | 52.49 |       | H0 |
| ANISOU 3281 HD23 LEU B 7 | 8100    | 7530    | 4310   | 180  | 50    | -800  | H0 |
| ATOM 3282 N TYR B 8      | -49.685 | -11.153 | -2.370 | 1.00 | 58.84 |       | N0 |
| ANISOU 3282 N TYR B 8    | 9590    | 8530    | 4230   | 470  | -30   | -900  | N0 |
| ATOM 3283 CA TYR B 8     | -49.507 | -10.125 | -3.434 | 1.00 | 60.53 |       | C0 |
| ANISOU 3283 CA TYR B 8   | 9870    | 8850    | 4270   | 570  | 0     | -790  | C0 |
| ATOM 3284 C TYR B 8      | -50.784 | -9.275  | -3.580 | 1.00 | 60.11 |       | C0 |
| ANISOU 3284 C TYR B 8    | 9740    | 8890    | 4210   | 500  | -230  | -770  | C0 |
| ATOM 3285 O TYR B 8      | -50.685 | -7.998  | -3.641 | 1.00 | 59.73 |       | O0 |
| ANISOU 3285 O TYR B 8    | 9600    | 8920    | 4180   | 550  | -190  | -610  | O0 |
| ATOM 3286 CB TYR B 8     | -49.167 | -10.782 | -4.775 | 1.00 | 64.11 |       | C0 |
| ANISOU 3286 CB TYR B 8   | 10630   | 9300    | 4430   | 690  | 50    | -880  | C0 |
| ATOM 3287 CG TYR B 8     | -48.953 | -9.820  | -5.915 | 1.00 | 65.81 |       | C0 |
| ANISOU 3287 CG TYR B 8   | 10950   | 9630    | 4430   | 810  | 90    | -770  | C0 |
| ATOM 3288 CD1 TYR B 8    | -47.731 | -9.192  | -6.101 | 1.00 | 66.47 |       | C0 |
| ANISOU 3288 CD1 TYR B 8  | 11010   | 9740    | 4510   | 930  | 340   | -610  | C0 |
| ATOM 3289 CD2 TYR B 8    | -49.967 | -9.542  | -6.816 | 1.00 | 68.10 |       | C0 |
| ANISOU 3289 CD2 TYR B 8  | 11350   | 9990    | 4530   | 810  | -110  | -810  | C0 |
| ATOM 3290 CE1 TYR B 8    | -47.520 | -8.315  | -7.154 | 1.00 | 68.07 |       | C0 |
| ANISOU 3290 CE1 TYR B 8  | 11320   | 10040   | 4510   | 1030 | 410   | -490  | C0 |
| ATOM 3291 CE2 TYR B 8    | -49.774 | -8.668  | -7.875 | 1.00 | 70.16 |       | C0 |

|             |            |    |         |         |        |      |       |       |    |
|-------------|------------|----|---------|---------|--------|------|-------|-------|----|
| ANISOU 3291 | CE2 TYR B  | 8  | 11730   | 10340   | 4580   | 930  | -60   | -700  | C0 |
| ATOM 3292   | CZ TYR B   | 8  | -48.547 | -8.047  | -8.042 | 1.00 | 70.17 |       | C0 |
| ANISOU 3292 | CZ TYR B   | 8  | 11730   | 10360   | 4570   | 1040 | 200   | -540  | C0 |
| ATOM 3293   | OH TYR B   | 8  | -48.356 | -7.182  | -9.082 | 1.00 | 73.15 |       | O0 |
| ANISOU 3293 | OH TYR B   | 8  | 12240   | 10820   | 4740   | 1150 | 260   | -410  | O0 |
| ATOM 3294   | H TYR B    | 8  | -49.681 | -12.004 | -2.700 | 1.00 | 59.81 |       | H0 |
| ANISOU 3294 | H TYR B    | 8  | 9870    | 8590    | 4270   | 470  | -40   | -1010 | H0 |
| ATOM 3295   | HA TYR B   | 8  | -48.760 | -9.528  | -3.174 | 1.00 | 59.73 |       | H0 |
| ANISOU 3295 | HA TYR B   | 8  | 9680    | 8770    | 4240   | 620  | 140   | -670  | H0 |
| ATOM 3296   | HB2 TYR B  | 8  | -48.356 | -11.320 | -4.659 | 1.00 | 64.02 |       | H0 |
| ANISOU 3296 | HB2 TYR B  | 8  | 10660   | 9240    | 4430   | 760  | 200   | -890  | H0 |
| ATOM 3297   | HB3 TYR B  | 8  | -49.896 | -11.391 | -5.012 | 1.00 | 64.82 |       | H0 |
| ANISOU 3297 | HB3 TYR B  | 8  | 10810   | 9370    | 4450   | 630  | -100  | -1010 | H0 |
| ATOM 3298   | HD1 TYR B  | 8  | -47.026 | -9.368  | -5.501 | 1.00 | 65.50 |       | H0 |
| ANISOU 3298 | HD1 TYR B  | 8  | 10790   | 9590    | 4510   | 940  | 480   | -570  | H0 |
| ATOM 3299   | HD2 TYR B  | 8  | -50.805 | -9.961  | -6.711 | 1.00 | 68.32 |       | H0 |
| ANISOU 3299 | HD2 TYR B  | 8  | 11380   | 10010   | 4570   | 720  | -290  | -920  | H0 |
| ATOM 3300   | HE1 TYR B  | 8  | -46.682 | -7.895  | -7.260 | 1.00 | 68.26 |       | H0 |
| ANISOU 3300 | HE1 TYR B  | 8  | 11320   | 10090   | 4530   | 1100 | 580   | -380  | H0 |
| ATOM 3301   | HE2 TYR B  | 8  | -50.478 | -8.490  | -8.476 | 1.00 | 71.15 |       | H0 |
| ANISOU 3301 | HE2 TYR B  | 8  | 11940   | 10520   | 4570   | 930  | -210  | -730  | H0 |
| ATOM 3302   | N ASN B    | 9  | -51.939 | -9.962  | -3.659 | 1.00 | 61.25 |       | N0 |
| ANISOU 3302 | N ASN B    | 9  | 9920    | 9030    | 4320   | 390  | -450  | -920  | N0 |
| ATOM 3303   | CA ASN B   | 9  | -53.283 | -9.342  | -3.812 | 1.00 | 62.60 |       | C0 |
| ANISOU 3303 | CA ASN B   | 9  | 9990    | 9320    | 4480   | 330  | -690  | -930  | C0 |
| ATOM 3304   | C ASN B    | 9  | -53.624 | -8.534  | -2.553 | 1.00 | 60.91 |       | C0 |
| ANISOU 3304 | C ASN B    | 9  | 9490    | 9120    | 4530   | 260  | -700  | -820  | C0 |
| ATOM 3305   | O ASN B    | 9  | -54.235 | -7.461  | -2.700 | 1.00 | 61.20 |       | O0 |
| ANISOU 3305 | O ASN B    | 9  | 9430    | 9260    | 4560   | 300  | -800  | -730  | O0 |
| ATOM 3306   | CB ASN B   | 9  | -54.354 | -10.388 | -4.133 | 1.00 | 64.54 |       | C0 |
| ANISOU 3306 | CB ASN B   | 9  | 10320   | 9560    | 4640   | 200  | -910  | -1120 | C0 |
| ATOM 3307   | CG ASN B   | 9  | -54.202 | -10.980 | -5.522 | 1.00 | 67.92 |       | C0 |
| ANISOU 3307 | CG ASN B   | 9  | 11050   | 9990    | 4760   | 270  | -950  | -1230 | C0 |
| ATOM 3308   | OD1 ASN B  | 9  | -53.283 | -10.628 | -6.262 | 1.00 | 68.63 |       | O0 |
| ANISOU 3308 | OD1 ASN B  | 9  | 11300   | 10090   | 4690   | 430  | -780  | -1150 | O0 |
| ATOM 3309   | ND2 ASN B  | 9  | -55.093 | -11.888 | -5.886 | 1.00 | 69.73 |       | N0 |
| ANISOU 3309 | ND2 ASN B  | 9  | 11380   | 10220   | 4890   | 140  | -1150 | -1410 | N0 |
| ATOM 3310   | H ASN B    | 9  | -51.969 | -10.880 | -3.628 | 1.00 | 61.90 |       | H0 |
| ANISOU 3310 | H ASN B    | 9  | 10080   | 9050    | 4390   | 350  | -460  | -1030 | H0 |
| ATOM 3311   | HA ASN B   | 9  | -53.243 | -8.717  | -4.574 | 1.00 | 63.51 |       | H0 |
| ANISOU 3311 | HA ASN B   | 9  | 10180   | 9500    | 4450   | 420  | -690  | -860  | H0 |
| ATOM 3312   | HB2 ASN B  | 9  | -54.302 | -11.108 | -3.471 | 1.00 | 64.00 |       | H0 |
| ANISOU 3312 | HB2 ASN B  | 9  | 10220   | 9410    | 4690   | 110  | -890  | -1190 | H0 |
| ATOM 3313   | HB3 ASN B  | 9  | -55.236 | -9.971  | -4.059 | 1.00 | 64.80 |       | H0 |
| ANISOU 3313 | HB3 ASN B  | 9  | 10230   | 9680    | 4700   | 140  | -1070 | -1110 | H0 |
| ATOM 3314   | HD21 ASN B | 9  | -55.040 | -12.266 | -6.684 | 1.00 | 71.38 |       | H0 |
| ANISOU 3314 | HD21 ASN B | 9  | 11790   | 10420   | 4910   | 180  | -1180 | -1480 | H0 |
| ATOM 3315   | HD22 ASN B | 9  | -55.743 | -12.119 | -5.332 | 1.00 | 69.36 |       | H0 |
| ANISOU 3315 | HD22 ASN B | 9  | 11210   | 10170   | 4970   | 20   | -1260 | -1450 | H0 |
| ATOM 3316   | N ILE B    | 10 | -53.241 | -9.018  | -1.367 | 1.00 | 59.44 |       | N0 |
| ANISOU 3316 | N ILE B    | 10 | 9180    | 8840    | 4560   | 180  | -610  | -830  | N0 |
| ATOM 3317   | CA ILE B   | 10 | -53.394 | -8.259  | -0.090 | 1.00 | 58.82 |       | C0 |
| ANISOU 3317 | CA ILE B   | 10 | 8850    | 8760    | 4730   | 140  | -590  | -730  | C0 |
| ATOM 3318   | C ILE B    | 10 | -52.576 | -6.966  | -0.198 | 1.00 | 59.48 |       | C0 |



|                           |         |         |        |      |       |       |    |
|---------------------------|---------|---------|--------|------|-------|-------|----|
| ANISOU 3318 C ILE B 10    | 8910    | 8870    | 4820   | 250  | -440  | -550  | C0 |
| ATOM 3319 O ILE B 10      | -53.120 | -5.903  | 0.155  | 1.00 | 59.62 |       | O0 |
| ANISOU 3319 O ILE B 10    | 8800    | 8940    | 4920   | 260  | -510  | -460  | O0 |
| ATOM 3320 CB ILE B 10     | -53.002 | -9.113  | 1.135  | 1.00 | 56.63 |       | C0 |
| ANISOU 3320 CB ILE B 10   | 8490    | 8370    | 4650   | 50   | -500  | -780  | C0 |
| ATOM 3321 CG1 ILE B 10    | -54.142 | -10.061 | 1.521  | 1.00 | 57.29 |       | C0 |
| ANISOU 3321 CG1 ILE B 10  | 8540    | 8440    | 4790   | -110 | -670  | -920  | C0 |
| ATOM 3322 CG2 ILE B 10    | -52.577 | -8.235  | 2.305  | 1.00 | 54.66 |       | C0 |
| ANISOU 3322 CG2 ILE B 10  | 8050    | 8110    | 4610   | 50   | -400  | -650  | C0 |
| ATOM 3323 CD1 ILE B 10    | -53.783 | -11.061 | 2.596  | 1.00 | 56.49 |       | C0 |
| ANISOU 3323 CD1 ILE B 10  | 8410    | 8200    | 4850   | -190 | -580  | -980  | C0 |
| ATOM 3324 H ILE B 10      | -52.872 | -9.844  | -1.265 | 1.00 | 59.84 |       | H0 |
| ANISOU 3324 H ILE B 10    | 9310    | 8810    | 4620   | 160  | -550  | -910  | H0 |
| ATOM 3325 HA ILE B 10     | -54.333 | -8.016  | 0.002  | 1.00 | 58.85 |       | H0 |
| ANISOU 3325 HA ILE B 10   | 8770    | 8830    | 4760   | 90   | -730  | -750  | H0 |
| ATOM 3326 HB ILE B 10     | -52.225 | -9.669  | 0.878  | 1.00 | 57.15 |       | H0 |
| ANISOU 3326 HB ILE B 10   | 8680    | 8380    | 4660   | 90   | -390  | -810  | H0 |
| ATOM 3327 HG12 ILE B 10   | -54.902 | -9.525  | 1.833  | 1.00 | 57.00 |       | H0 |
| ANISOU 3327 HG12 ILE B 10 | 8360    | 8470    | 4820   | -150 | -760  | -890  | H0 |
| ATOM 3328 HG13 ILE B 10   | -54.429 | -10.550 | 0.721  | 1.00 | 58.80 |       | H0 |
| ANISOU 3328 HG13 ILE B 10 | 8860    | 8640    | 4840   | -120 | -740  | -1010 | H0 |
| ATOM 3329 HG21 ILE B 10   | -51.723 | -7.814  | 2.107  | 1.00 | 54.44 |       | H0 |
| ANISOU 3329 HG21 ILE B 10 | 8050    | 8080    | 4560   | 130  | -280  | -570  | H0 |
| ATOM 3330 HG22 ILE B 10   | -52.485 | -8.779  | 3.106  | 1.00 | 53.81 |       | H0 |
| ANISOU 3330 HG22 ILE B 10 | 7880    | 7940    | 4620   | -10  | -370  | -680  | H0 |
| ATOM 3331 HG23 ILE B 10   | -53.249 | -7.548  | 2.460  | 1.00 | 54.41 |       | H0 |
| ANISOU 3331 HG23 ILE B 10 | 7920    | 8140    | 4620   | 40   | -490  | -610  | H0 |
| ATOM 3332 HD11 ILE B 10   | -52.886 | -11.405 | 2.435  | 1.00 | 56.46 |       | H0 |
| ANISOU 3332 HD11 ILE B 10 | 8510    | 8140    | 4800   | -120 | -460  | -970  | H0 |
| ATOM 3333 HD12 ILE B 10   | -54.418 | -11.798 | 2.581  | 1.00 | 57.25 |       | H0 |
| ANISOU 3333 HD12 ILE B 10 | 8540    | 8270    | 4930   | -290 | -680  | -1080 | H0 |
| ATOM 3334 HD13 ILE B 10   | -53.811 | -10.628 | 3.467  | 1.00 | 55.09 |       | H0 |
| ANISOU 3334 HD13 ILE B 10 | 8080    | 8030    | 4820   | -210 | -550  | -910  | H0 |
| ATOM 3335 N ARG B 11      | -51.339 | -7.053  | -0.698 | 1.00 | 61.17 |       | N0 |
| ANISOU 3335 N ARG B 11    | 9250    | 9050    | 4950   | 340  | -250  | -510  | N0 |
| ATOM 3336 CA ARG B 11     | -50.389 | -5.908  | -0.789 | 1.00 | 62.92 |       | C0 |
| ANISOU 3336 CA ARG B 11   | 9440    | 9290    | 5180   | 420  | -90   | -330  | C0 |
| ATOM 3337 C ARG B 11      | -50.835 | -4.898  | -1.859 | 1.00 | 64.52 |       | C0 |
| ANISOU 3337 C ARG B 11    | 9750    | 9570    | 5200   | 510  | -150  | -250  | C0 |
| ATOM 3338 O ARG B 11      | -50.236 | -3.811  | -1.906 | 1.00 | 65.04 |       | O0 |
| ANISOU 3338 O ARG B 11    | 9790    | 9640    | 5280   | 550  | -40   | -90   | O0 |
| ATOM 3339 CB ARG B 11     | -48.976 | -6.414  | -1.094 | 1.00 | 64.81 |       | C0 |
| ANISOU 3339 CB ARG B 11   | 9770    | 9490    | 5360   | 500  | 140   | -310  | C0 |
| ATOM 3340 CG ARG B 11     | -48.342 | -7.224  | 0.029  | 1.00 | 64.49 |       | C0 |
| ANISOU 3340 CG ARG B 11   | 9620    | 9380    | 5510   | 450  | 230   | -350  | C0 |
| ATOM 3341 CD ARG B 11     | -47.346 | -6.435  | 0.857  | 1.00 | 64.79 |       | C0 |
| ANISOU 3341 CD ARG B 11   | 9490    | 9410    | 5720   | 440  | 380   | -210  | C0 |
| ATOM 3342 NE ARG B 11     | -46.374 | -7.299  | 1.515  | 1.00 | 65.77 |       | N0 |
| ANISOU 3342 NE ARG B 11   | 9560    | 9490    | 5940   | 450  | 510   | -240  | N0 |
| ATOM 3343 CZ ARG B 11     | -45.367 | -7.929  | 0.904  | 1.00 | 68.00 |       | C0 |
| ANISOU 3343 CZ ARG B 11   | 9940    | 9790    | 6110   | 560  | 670   | -240  | C0 |
| ATOM 3344 NH1 ARG B 11    | -45.183 | -7.809  | -0.402 | 1.00 | 70.08 |       | N0 |
| ANISOU 3344 NH1 ARG B 11  | 10370   | 10100   | 6150   | 660  | 730   | -230  | N0 |
| ATOM 3345 NH2 ARG B 11    | -44.543 | -8.684  | 1.609  | 1.00 | 67.83 |       | N0 |

|                           |         |        |        |      |       |      |    |
|---------------------------|---------|--------|--------|------|-------|------|----|
| ANISOU 3345 NH2 ARG B 11  | 9850    | 9730   | 6190   | 590  | 780   | -260 | N0 |
| ATOM 3346 H ARG B 11      | -50.994 | -7.836 | -1.011 | 1.00 | 61.98 |      | H0 |
| ANISOU 3346 H ARG B 11    | 9460    | 9120   | 4980   | 360  | -210  | -580 | H0 |
| ATOM 3347 HA ARG B 11     | -50.377 | -5.451 | 0.084  | 1.00 | 61.49 |      | H0 |
| ANISOU 3347 HA ARG B 11   | 9120    | 9080   | 5160   | 380  | -70   | -280 | H0 |
| ATOM 3348 HB2 ARG B 11    | -49.010 | -6.967 | -1.901 | 1.00 | 66.00 |      | H0 |
| ANISOU 3348 HB2 ARG B 11  | 10070   | 9650   | 5350   | 540  | 120   | -380 | H0 |
| ATOM 3349 HB3 ARG B 11    | -48.405 | -5.641 | -1.287 | 1.00 | 64.79 |      | H0 |
| ANISOU 3349 HB3 ARG B 11  | 9760    | 9510   | 5350   | 540  | 240   | -190 | H0 |
| ATOM 3350 HG2 ARG B 11    | -49.049 | -7.556 | 0.623  | 1.00 | 63.87 |      | H0 |
| ANISOU 3350 HG2 ARG B 11  | 9480    | 9270   | 5520   | 370  | 110   | -420 | H0 |
| ATOM 3351 HG3 ARG B 11    | -47.887 | -8.002 | -0.356 | 1.00 | 65.40 |      | H0 |
| ANISOU 3351 HG3 ARG B 11  | 9840    | 9470   | 5540   | 500  | 300   | -410 | H0 |
| ATOM 3352 HD2 ARG B 11    | -46.873 | -5.799 | 0.279  | 1.00 | 65.44 |      | H0 |
| ANISOU 3352 HD2 ARG B 11  | 9610    | 9530   | 5720   | 490  | 460   | -120 | H0 |
| ATOM 3353 HD3 ARG B 11    | -47.829 | -5.920 | 1.537  | 1.00 | 63.70 |      | H0 |
| ANISOU 3353 HD3 ARG B 11  | 9240    | 9260   | 5700   | 370  | 300   | -190 | H0 |
| ATOM 3354 HE ARG B 11     | -46.451 | -7.409 | 2.377  | 1.00 | 64.65 |      | H0 |
| ANISOU 3354 HE ARG B 11   | 9320    | 9320   | 5930   | 400  | 490   | -250 | H0 |
| ATOM 3355 HH11 ARG B 11   | -45.720 | -7.309 | -0.883 | 1.00 | 70.27 |      | H0 |
| ANISOU 3355 HH11 ARG B 11 | 10450   | 10150  | 6100   | 650  | 660   | -210 | H0 |
| ATOM 3356 HH12 ARG B 11   | -44.516 | -8.230 | -0.789 | 1.00 | 70.79 |      | H0 |
| ANISOU 3356 HH12 ARG B 11 | 10530   | 10200  | 6170   | 740  | 850   | -230 | H0 |
| ATOM 3357 HH21 ARG B 11   | -44.661 | -8.771 | 2.478  | 1.00 | 66.56 |      | H0 |
| ANISOU 3357 HH21 ARG B 11 | 9590    | 9540   | 6160   | 530  | 740   | -270 | H0 |
| ATOM 3358 HH22 ARG B 11   | -43.880 | -9.104 | 1.208  | 1.00 | 68.60 |      | H0 |
| ANISOU 3358 HH22 ARG B 11 | 10010   | 9840   | 6210   | 680  | 890   | -260 | H0 |
| ATOM 3359 N GLN B 12      | -51.836 | -5.232 | -2.682 | 1.00 | 66.06 |      | N0 |
| ANISOU 3359 N GLN B 12    | 10050   | 9830   | 5220   | 520  | -340  | -340 | N0 |
| ATOM 3360 CA GLN B 12     | -52.332 | -4.378 | -3.797 | 1.00 | 67.89 |      | C0 |
| ANISOU 3360 CA GLN B 12   | 10400   | 10150  | 5250   | 620  | -430  | -270 | C0 |
| ATOM 3361 C GLN B 12      | -53.544 | -3.546 | -3.355 | 1.00 | 67.12 |      | C0 |
| ANISOU 3361 C GLN B 12    | 10150   | 10110  | 5240   | 610  | -620  | -230 | C0 |
| ATOM 3362 O GLN B 12      | -53.729 | -2.447 | -3.920 | 1.00 | 67.13 |      | O0 |
| ANISOU 3362 O GLN B 12    | 10210   | 10160  | 5140   | 710  | -630  | -100 | O0 |
| ATOM 3363 CB GLN B 12     | -52.702 | -5.244 | -5.002 | 1.00 | 70.57 |      | C0 |
| ANISOU 3363 CB GLN B 12   | 10950   | 10540  | 5320   | 660  | -540  | -400 | C0 |
| ATOM 3364 CG GLN B 12     | -51.494 | -5.811 | -5.731 | 1.00 | 72.08 |      | C0 |
| ANISOU 3364 CG GLN B 12   | 11340   | 10690  | 5360   | 740  | -330  | -410 | C0 |
| ATOM 3365 CD GLN B 12     | -50.864 | -4.795 | -6.651 | 1.00 | 73.72 |      | C0 |
| ANISOU 3365 CD GLN B 12   | 11680   | 10940  | 5390   | 870  | -200  | -240 | C0 |
| ATOM 3366 OE1 GLN B 12    | -51.379 | -4.503 | -7.730 | 1.00 | 75.88 |      | O0 |
| ANISOU 3366 OE1 GLN B 12  | 12110   | 11290  | 5430   | 960  | -300  | -240 | O0 |
| ATOM 3367 NE2 GLN B 12    | -49.737 | -4.247 | -6.226 | 1.00 | 72.93 |      | N0 |
| ANISOU 3367 NE2 GLN B 12  | 11500   | 10790  | 5410   | 890  | 40    | -100 | N0 |
| ATOM 3368 H GLN B 12      | -52.271 | -6.027 | -2.623 | 1.00 | 66.28 |      | H0 |
| ANISOU 3368 H GLN B 12    | 10090   | 9850   | 5250   | 470  | -430  | -460 | H0 |
| ATOM 3369 HA GLN B 12     | -51.609 | -3.763 | -4.061 | 1.00 | 68.00 |      | H0 |
| ANISOU 3369 HA GLN B 12   | 10460   | 10150  | 5220   | 690  | -290  | -160 | H0 |
| ATOM 3370 HB2 GLN B 12    | -53.268 | -5.983 | -4.695 | 1.00 | 70.48 |      | H0 |
| ANISOU 3370 HB2 GLN B 12  | 10900   | 10520  | 5360   | 570  | -650  | -520 | H0 |
| ATOM 3371 HB3 GLN B 12    | -53.229 | -4.702 | -5.627 | 1.00 | 71.72 |      | H0 |
| ANISOU 3371 HB3 GLN B 12  | 11150   | 10760  | 5340   | 720  | -640  | -360 | H0 |
| ATOM 3372 HG2 GLN B 12    | -50.829 | -6.106 | -5.076 | 1.00 | 70.86 |      | H0 |

|             |               |         |        |        |      |       |      |    |
|-------------|---------------|---------|--------|--------|------|-------|------|----|
| ANISOU 3372 | HG2 GLN B 12  | 11110   | 10470  | 5340   | 710  | -200  | -400 | H0 |
| ATOM 3373   | HG3 GLN B 12  | -51.769 | -6.594 | -6.255 | 1.00 | 73.25 |      | H0 |
| ANISOU 3373 | HG3 GLN B 12  | 11620   | 10840  | 5380   | 740  | -410  | -530 | H0 |
| ATOM 3374   | HE21 GLN B 12 | -49.170 | -3.895 | -6.808 | 1.00 | 73.76 |      | H0 |
| ANISOU 3374 | HE21 GLN B 12 | 11700   | 10910  | 5410   | 960  | 160   | -20  | H0 |
| ATOM 3375   | HE22 GLN B 12 | -49.549 | -4.230 | -5.362 | 1.00 | 71.39 |      | H0 |
| ANISOU 3375 | HE22 GLN B 12 | 11160   | 10560  | 5400   | 820  | 70    | -90  | H0 |
| ATOM 3376   | N THR B 13    | -54.349 | -4.052 | -2.412 | 1.00 | 65.11 |      | N0 |
| ANISOU 3376 | N THR B 13    | 9720    | 9860   | 5160   | 490  | -740  | -330 | N0 |
| ATOM 3377   | CA THR B 13   | -55.640 | -3.440 | -1.988 | 1.00 | 64.59 |      | C0 |
| ANISOU 3377 | CA THR B 13   | 9490    | 9880   | 5170   | 480  | -930  | -310 | C0 |
| ATOM 3378   | C THR B 13    | -55.565 | -2.932 | -0.543 | 1.00 | 61.30 |      | C0 |
| ANISOU 3378 | C THR B 13    | 8870    | 9400   | 5030   | 430  | -860  | -250 | C0 |
| ATOM 3379   | O THR B 13    | -56.311 | -1.980 | -0.235 | 1.00 | 61.02 |      | O0 |
| ANISOU 3379 | O THR B 13    | 8730    | 9410   | 5050   | 480  | -940  | -170 | O0 |
| ATOM 3380   | CB THR B 13   | -56.806 | -4.421 | -2.167 | 1.00 | 66.45 |      | C0 |
| ANISOU 3380 | CB THR B 13   | 9680    | 10200  | 5370   | 390  | -1160 | -480 | C0 |
| ATOM 3381   | OG1 THR B 13  | -56.387 | -5.696 | -1.678 | 1.00 | 66.41 |      | O0 |
| ANISOU 3381 | OG1 THR B 13  | 9680    | 10100  | 5440   | 260  | -1090 | -600 | O0 |
| ATOM 3382   | CG2 THR B 13  | -57.261 | -4.542 | -3.606 | 1.00 | 69.28 |      | C0 |
| ANISOU 3382 | CG2 THR B 13  | 10210   | 10670  | 5440   | 460  | -1300 | -520 | C0 |
| ATOM 3383   | H THR B 13    | -54.177 | -4.833 | -1.979 | 1.00 | 64.60 |      | H0 |
| ANISOU 3383 | H THR B 13    | 9630    | 9750   | 5170   | 420  | -720  | -410 | H0 |
| ATOM 3384   | HA THR B 13   | -55.806 | -2.665 | -2.572 | 1.00 | 65.53 |      | H0 |
| ANISOU 3384 | HA THR B 13   | 9670    | 10050  | 5180   | 580  | -960  | -230 | H0 |
| ATOM 3385   | HB THR B 13   | -57.564 | -4.104 | -1.620 | 1.00 | 66.18 |      | H0 |
| ANISOU 3385 | HB THR B 13   | 9490    | 10220  | 5440   | 360  | -1250 | -470 | H0 |
| ATOM 3386   | HG21 THR B 13 | -57.556 | -3.671 | -3.929 | 1.00 | 69.79 |      | H0 |
| ANISOU 3386 | HG21 THR B 13 | 10280   | 10800  | 5450   | 560  | -1350 | -430 | H0 |
| ATOM 3387   | HG22 THR B 13 | -58.000 | -5.174 | -3.662 | 1.00 | 70.01 |      | H0 |
| ANISOU 3387 | HG22 THR B 13 | 10260   | 10820  | 5520   | 380  | -1450 | -640 | H0 |
| ATOM 3388   | HG23 THR B 13 | -56.522 | -4.858 | -4.156 | 1.00 | 69.62 |      | H0 |
| ANISOU 3388 | HG23 THR B 13 | 10420   | 10660  | 5370   | 490  | -1200 | -540 | H0 |
| ATOM 3389   | N SER B 14    | -54.736 | -3.549 | 0.311  | 1.00 | 58.58 |      | N0 |
| ANISOU 3389 | N SER B 14    | 8480    | 8950   | 4830   | 340  | -710  | -280 | N0 |
| ATOM 3390   | CA SER B 14   | -54.537 | -3.146 | 1.730  | 1.00 | 55.45 |      | C0 |
| ANISOU 3390 | CA SER B 14   | 7910    | 8480   | 4680   | 290  | -630  | -230 | C0 |
| ATOM 3391   | C SER B 14    | -53.864 | -1.770 | 1.789  | 1.00 | 55.13 |      | C0 |
| ANISOU 3391 | C SER B 14    | 7890    | 8400   | 4660   | 370  | -510  | -60  | C0 |
| ATOM 3392   | O SER B 14    | -52.832 | -1.570 | 1.101  | 1.00 | 55.27 |      | O0 |
| ANISOU 3392 | O SER B 14    | 8040    | 8380   | 4570   | 420  | -370  | 10   | O0 |
| ATOM 3393   | CB SER B 14   | -53.741 | -4.162 | 2.507  | 1.00 | 53.86 |      | C0 |
| ANISOU 3393 | CB SER B 14   | 7680    | 8190   | 4600   | 200  | -520  | -300 | C0 |
| ATOM 3394   | OG SER B 14   | -53.625 | -3.781 | 3.871  | 1.00 | 50.80 |      | O0 |
| ANISOU 3394 | OG SER B 14   | 7130    | 7750   | 4420   | 150  | -460  | -250 | O0 |
| ATOM 3395   | H SER B 14    | -54.235 | -4.274 | 0.087  | 1.00 | 58.73 |      | H0 |
| ANISOU 3395 | H SER B 14    | 8570    | 8930   | 4810   | 320  | -650  | -340 | H0 |
| ATOM 3396   | HA SER B 14   | -55.435 | -3.069 | 2.151  | 1.00 | 55.53 |      | H0 |
| ANISOU 3396 | HA SER B 14   | 7810    | 8540   | 4750   | 260  | -750  | -250 | H0 |
| ATOM 3397   | HB2 SER B 14  | -54.183 | -5.039 | 2.447  | 1.00 | 54.01 |      | H0 |
| ANISOU 3397 | HB2 SER B 14  | 7700    | 8220   | 4600   | 140  | -590  | -400 | H0 |
| ATOM 3398   | HB3 SER B 14  | -52.843 | -4.244 | 2.113  | 1.00 | 53.78 |      | H0 |
| ANISOU 3398 | HB3 SER B 14  | 7760    | 8150   | 4530   | 230  | -400  | -270 | H0 |
| ATOM 3399   | N ARG B 15    | -54.449 | -0.866 | 2.580  | 1.00 | 53.88 |      | N0 |

|                  |          |         |        |        |      |       |     |    |
|------------------|----------|---------|--------|--------|------|-------|-----|----|
| ANISOU 3399 N    | ARG B 15 | 7610    | 8230   | 4620   | 380  | -560  | 0   | N0 |
| ATOM 3400 CA     | ARG B 15 | -53.933 | 0.494  | 2.877  | 1.00 | 52.99 |     | C0 |
| ANISOU 3400 CA   | ARG B 15 | 7530    | 8050   | 4560   | 440  | -460  | 150 | C0 |
| ATOM 3401 C      | ARG B 15 | -53.727 | 0.587  | 4.386  | 1.00 | 49.69 |     | C0 |
| ANISOU 3401 C    | ARG B 15 | 6960    | 7550   | 4370   | 350  | -400  | 150 | C0 |
| ATOM 3402 O      | ARG B 15 | -54.663 | 0.881  | 5.127  | 1.00 | 48.99 |     | O0 |
| ANISOU 3402 O    | ARG B 15 | 6760    | 7480   | 4370   | 360  | -490  | 130 | O0 |
| ATOM 3403 CB     | ARG B 15 | -54.919 | 1.542  | 2.352  | 1.00 | 55.75 |     | C0 |
| ANISOU 3403 CB   | ARG B 15 | 7910    | 8450   | 4820   | 570  | -580  | 230 | C0 |
| ATOM 3404 CG     | ARG B 15 | -55.077 | 1.553  | 0.837  | 1.00 | 58.83 |     | C0 |
| ANISOU 3404 CG   | ARG B 15 | 8470    | 8920   | 4960   | 660  | -640  | 250 | C0 |
| ATOM 3405 CD     | ARG B 15 | -53.942 | 2.293  | 0.148  | 1.00 | 60.66 |     | C0 |
| ANISOU 3405 CD   | ARG B 15 | 8880    | 9070   | 5090   | 710  | -470  | 390 | C0 |
| ATOM 3406 NE     | ARG B 15 | -54.072 | 2.291  | -1.306 | 1.00 | 63.43 |     | N0 |
| ANISOU 3406 NE   | ARG B 15 | 9410    | 9500   | 5180   | 810  | -510  | 410 | N0 |
| ATOM 3407 CZ     | ARG B 15 | -53.643 | 1.324  | -2.117 | 1.00 | 64.69 |     | C0 |
| ANISOU 3407 CZ   | ARG B 15 | 9670    | 9710   | 5200   | 800  | -480  | 330 | C0 |
| ATOM 3408 NH1    | ARG B 15 | -53.823 | 1.439  | -3.424 | 1.00 | 66.90 |     | N0 |
| ANISOU 3408 NH1  | ARG B 15 | 10130   | 10060  | 5230   | 910  | -530  | 360 | N0 |
| ATOM 3409 NH2    | ARG B 15 | -53.042 | 0.248  | -1.633 | 1.00 | 63.51 |     | N0 |
| ANISOU 3409 NH2  | ARG B 15 | 9460    | 9530   | 5150   | 690  | -410  | 230 | N0 |
| ATOM 3410 H      | ARG B 15 | -55.238 | -1.039 | 3.002  | 1.00 | 53.74 |     | H0 |
| ANISOU 3410 H    | ARG B 15 | 7500    | 8260   | 4660   | 360  | -650  | -50 | H0 |
| ATOM 3411 HA     | ARG B 15 | -53.069 | 0.614  | 2.423  | 1.00 | 53.33 |     | H0 |
| ANISOU 3411 HA   | ARG B 15 | 7660    | 8050   | 4540   | 450  | -350  | 200 | H0 |
| ATOM 3412 HB2    | ARG B 15 | -55.795 | 1.373  | 2.757  | 1.00 | 55.53 |     | H0 |
| ANISOU 3412 HB2  | ARG B 15 | 7780    | 8480   | 4840   | 560  | -690  | 180 | H0 |
| ATOM 3413 HB3    | ARG B 15 | -54.618 | 2.427  | 2.645  | 1.00 | 55.42 |     | H0 |
| ANISOU 3413 HB3  | ARG B 15 | 7900    | 8340   | 4820   | 590  | -510  | 320 | H0 |
| ATOM 3414 HG2    | ARG B 15 | -55.104 | 0.630  | 0.505  | 1.00 | 59.07 |     | H0 |
| ANISOU 3414 HG2  | ARG B 15 | 8510    | 9000   | 4940   | 620  | -670  | 150 | H0 |
| ATOM 3415 HG3    | ARG B 15 | -55.927 | 1.983  | 0.603  | 1.00 | 59.74 |     | H0 |
| ANISOU 3415 HG3  | ARG B 15 | 8580    | 9100   | 5020   | 740  | -750  | 270 | H0 |
| ATOM 3416 HD2    | ARG B 15 | -53.930 | 3.222  | 0.464  | 1.00 | 60.46 |     | H0 |
| ANISOU 3416 HD2  | ARG B 15 | 8870    | 8990   | 5120   | 740  | -430  | 480 | H0 |
| ATOM 3417 HD3    | ARG B 15 | -53.088 | 1.882  | 0.400  | 1.00 | 59.76 |     | H0 |
| ANISOU 3417 HD3  | ARG B 15 | 8760    | 8910   | 5030   | 630  | -350  | 370 | H0 |
| ATOM 3418 HE     | ARG B 15 | -54.462 | 2.978  | -1.674 | 1.00 | 64.36 |     | H0 |
| ANISOU 3418 HE   | ARG B 15 | 9590    | 9630   | 5230   | 900  | -560  | 480 | H0 |
| ATOM 3419 HH11   | ARG B 15 | -54.221 | 2.152  | -3.751 | 1.00 | 67.69 |     | H0 |
| ANISOU 3419 HH11 | ARG B 15 | 10280   | 10170  | 5260   | 990  | -590  | 440 | H0 |
| ATOM 3420 HH12   | ARG B 15 | -53.542 | 0.804  | -3.963 | 1.00 | 67.39 |     | H0 |
| ANISOU 3420 HH12 | ARG B 15 | 10270   | 10140  | 5190   | 900  | -510  | 310 | H0 |
| ATOM 3421 HH21   | ARG B 15 | -52.919 | 0.158  | -0.768 | 1.00 | 62.19 |     | H0 |
| ANISOU 3421 HH21 | ARG B 15 | 9180    | 9320   | 5140   | 620  | -380  | 210 | H0 |
| ATOM 3422 HH22   | ARG B 15 | -52.766 | -0.383 | -2.184 | 1.00 | 64.09 |     | H0 |
| ANISOU 3422 HH22 | ARG B 15 | 9610    | 9620   | 5120   | 690  | -390  | 180 | H0 |
| ATOM 3423 N      | PRO B 16 | -52.509 | 0.301  | 4.898  | 1.00 | 47.33 |     | N0 |
| ANISOU 3423 N    | PRO B 16 | 6650    | 7170   | 4160   | 280  | -250  | 160 | N0 |
| ATOM 3424 CA     | PRO B 16 | -52.282 | 0.244  | 6.344  | 1.00 | 44.89 |     | C0 |
| ANISOU 3424 CA   | PRO B 16 | 6210    | 6800   | 4050   | 200  | -210  | 140 | C0 |
| ATOM 3425 C      | PRO B 16 | -52.625 | 1.530  | 7.119  | 1.00 | 44.05 |     | C0 |
| ANISOU 3425 C    | PRO B 16 | 6070    | 6640   | 4030   | 220  | -220  | 220 | C0 |
| ATOM 3426 O      | PRO B 16 | -52.857 | 1.434  | 8.310  | 1.00 | 42.33 |     | O0 |

|                           |         |        |       |      |       |     |    |
|---------------------------|---------|--------|-------|------|-------|-----|----|
| ANISOU 3426 O PROB B 16   | 5740    | 6390   | 3950  | 170  | -230  | 180 | O0 |
| ATOM 3427 CB PROB B 16    | -50.782 | -0.071 | 6.470 | 1.00 | 44.56 |     | C0 |
| ANISOU 3427 CB PROB B 16  | 6180    | 6710   | 4040  | 140  | -40   | 170 | C0 |
| ATOM 3428 CG PROB B 16    | -50.395 | -0.683 | 5.131 | 1.00 | 46.10 |     | C0 |
| ANISOU 3428 CG PROB B 16  | 6500    | 6960   | 4060  | 180  | -10   | 150 | C0 |
| ATOM 3429 CD PROB B 16    | -51.305 | -0.029 | 4.116 | 1.00 | 47.49 |     | C0 |
| ANISOU 3429 CD PROB B 16  | 6780    | 7180   | 4080  | 280  | -110  | 190 | C0 |
| ATOM 3430 HA PROB B 16    | -52.799 | -0.512 | 6.717 | 1.00 | 44.56 |     | H0 |
| ANISOU 3430 HA PROB B 16  | 6100    | 6790   | 4050  | 160  | -270  | 50  | H0 |
| ATOM 3431 HB2 PROB B 16   | -50.265 | 0.746  | 6.639 | 1.00 | 44.58 |     | H0 |
| ANISOU 3431 HB2 PROB B 16 | 6200    | 6660   | 4070  | 130  | 20    | 250 | H0 |
| ATOM 3432 HB3 PROB B 16   | -50.618 | -0.704 | 7.201 | 1.00 | 43.72 |     | H0 |
| ANISOU 3432 HB3 PROB B 16 | 6000    | 6590   | 4020  | 80   | -30   | 110 | H0 |
| ATOM 3433 HG2 PROB B 16   | -49.457 | -0.498 | 4.924 | 1.00 | 46.23 |     | H0 |
| ANISOU 3433 HG2 PROB B 16 | 6550    | 6950   | 4060  | 180  | 110   | 210 | H0 |
| ATOM 3434 HG3 PROB B 16   | -50.530 | -1.652 | 5.142 | 1.00 | 45.90 |     | H0 |
| ANISOU 3434 HG3 PROB B 16 | 6460    | 6950   | 4020  | 170  | -30   | 60  | H0 |
| ATOM 3435 HD2 PROB B 16   | -50.898 | 0.775  | 3.744 | 1.00 | 48.13 |     | H0 |
| ANISOU 3435 HD2 PROB B 16 | 6930    | 7240   | 4120  | 310  | -50   | 280 | H0 |
| ATOM 3436 HD3 PROB B 16   | -51.515 | -0.645 | 3.390 | 1.00 | 48.35 |     | H0 |
| ANISOU 3436 HD3 PROB B 16 | 6950    | 7340   | 4080  | 300  | -150  | 130 | H0 |
| ATOM 3437 N ASP B 17      | -52.672 | 2.687  | 6.449 | 1.00 | 44.35 |     | N0 |
| ANISOU 3437 N ASP B 17    | 6220    | 6650   | 3980  | 300  | -210  | 330 | N0 |
| ATOM 3438 CA ASP B 17     | -52.908 | 4.007  | 7.097 | 1.00 | 43.93 |     | C0 |
| ANISOU 3438 CA ASP B 17   | 6190    | 6500   | 4000  | 340  | -210  | 410 | C0 |
| ATOM 3439 C ASP B 17      | -54.337 | 4.494  | 6.827 | 1.00 | 44.19 |     | C0 |
| ANISOU 3439 C ASP B 17    | 6220    | 6600   | 3970  | 480  | -350  | 420 | C0 |
| ATOM 3440 O ASP B 17      | -54.616 | 5.664  | 7.141 | 1.00 | 44.08 |     | O0 |
| ANISOU 3440 O ASP B 17    | 6260    | 6510   | 3980  | 560  | -350  | 500 | O0 |
| ATOM 3441 CB ASP B 17     | -51.856 | 5.020  | 6.639 | 1.00 | 45.36 |     | C0 |
| ANISOU 3441 CB ASP B 17   | 6520    | 6580   | 4140  | 330  | -80   | 540 | C0 |
| ATOM 3442 CG ASP B 17     | -50.434 | 4.590  | 6.958 | 1.00 | 45.51 |     | C0 |
| ANISOU 3442 CG ASP B 17   | 6500    | 6570   | 4230  | 190  | 50    | 550 | C0 |
| ATOM 3443 OD1 ASP B 17    | -50.213 | 4.037  | 8.067 | 1.00 | 44.07 |     | O0 |
| ANISOU 3443 OD1 ASP B 17  | 6180    | 6380   | 4180  | 110  | 60    | 470 | O0 |
| ATOM 3444 OD2 ASP B 17    | -49.554 | 4.797  | 6.092 | 1.00 | 47.69 |     | O0 |
| ANISOU 3444 OD2 ASP B 17  | 6860    | 6840   | 4420  | 180  | 160   | 630 | O0 |
| ATOM 3445 H ASP B 17      | -52.546 | 2.742  | 5.550 | 1.00 | 45.36 |     | H0 |
| ANISOU 3445 H ASP B 17    | 6440    | 6800   | 3990  | 350  | -210  | 360 | H0 |
| ATOM 3446 HA ASP B 17     | -52.806 | 3.891  | 8.070 | 1.00 | 43.00 |     | H0 |
| ANISOU 3446 HA ASP B 17   | 5990    | 6350   | 4000  | 280  | -190  | 380 | H0 |
| ATOM 3447 HB2 ASP B 17    | -51.933 | 5.148  | 5.671 | 1.00 | 46.47 |     | H0 |
| ANISOU 3447 HB2 ASP B 17  | 6750    | 6760   | 4150  | 390  | -90   | 580 | H0 |
| ATOM 3448 HB3 ASP B 17    | -52.024 | 5.880  | 7.076 | 1.00 | 45.54 |     | H0 |
| ANISOU 3448 HB3 ASP B 17  | 6570    | 6530   | 4200  | 350  | -80   | 590 | H0 |
| ATOM 3449 N VAL B 18      | -55.202 | 3.629  | 6.277 | 1.00 | 44.54 |     | N0 |
| ANISOU 3449 N VAL B 18    | 6200    | 6780   | 3940  | 510  | -470  | 340 | N0 |
| ATOM 3450 CA VAL B 18     | -56.631 | 3.919  | 5.945 | 1.00 | 45.28 |     | C0 |
| ANISOU 3450 CA VAL B 18   | 6250    | 6990   | 3970  | 640  | -630  | 330 | C0 |
| ATOM 3451 C VAL B 18      | -57.526 | 2.959  | 6.737 | 1.00 | 44.73 |     | C0 |
| ANISOU 3451 C VAL B 18    | 5970    | 7020   | 4010  | 580  | -720  | 210 | C0 |
| ATOM 3452 O VAL B 18      | -57.442 | 1.737  | 6.496 | 1.00 | 44.72 |     | O0 |
| ANISOU 3452 O VAL B 18    | 5930    | 7080   | 3990  | 470  | -740  | 110 | O0 |
| ATOM 3453 CB VAL B 18     | -56.900 | 3.788  | 4.434 | 1.00 | 46.82 |     | C0 |

|                           |         |       |        |      |       |     |    |
|---------------------------|---------|-------|--------|------|-------|-----|----|
| ANISOU 3453 CB VAL B 18   | 6550    | 7290  | 3950   | 720  | -710  | 350 | C0 |
| ATOM 3454 CG1 VAL B 18    | -58.367 | 4.024 | 4.102  | 1.00 | 48.38 |     | C0 |
| ANISOU 3454 CG1 VAL B 18  | 6670    | 7630  | 4080   | 860  | -900  | 340 | C0 |
| ATOM 3455 CG2 VAL B 18    | -56.003 | 4.711 | 3.619  | 1.00 | 47.79 |     | C0 |
| ANISOU 3455 CG2 VAL B 18  | 6890    | 7310  | 3960   | 780  | -610  | 480 | C0 |
| ATOM 3456 H VAL B 18      | -54.964 | 2.777 | 6.064  | 1.00 | 44.21 |     | H0 |
| ANISOU 3456 H VAL B 18    | 6140    | 6780  | 3880   | 450  | -470  | 270 | H0 |
| ATOM 3457 HA VAL B 18     | -56.835 | 4.831 | 6.219  | 1.00 | 45.65 |     | H0 |
| ANISOU 3457 HA VAL B 18   | 6320    | 6990  | 4040   | 720  | -620  | 400 | H0 |
| ATOM 3458 HB VAL B 18     | -56.682 | 2.859 | 4.179  | 1.00 | 46.69 |     | H0 |
| ANISOU 3458 HB VAL B 18   | 6520    | 7310  | 3910   | 640  | -720  | 270 | H0 |
| ATOM 3459 HG11 VAL B 18   | -58.887 | 3.239 | 4.346  | 1.00 | 48.20 |     | H0 |
| ANISOU 3459 HG11 VAL B 18 | 6520    | 7690  | 4100   | 790  | -970  | 250 | H0 |
| ATOM 3460 HG12 VAL B 18   | -58.462 | 4.189 | 3.147  | 1.00 | 49.64 |     | H0 |
| ANISOU 3460 HG12 VAL B 18 | 6920    | 7840  | 4100   | 930  | -940  | 370 | H0 |
| ATOM 3461 HG13 VAL B 18   | -58.692 | 4.795 | 4.597  | 1.00 | 48.43 |     | H0 |
| ANISOU 3461 HG13 VAL B 18 | 6650    | 7600  | 4150   | 930  | -890  | 390 | H0 |
| ATOM 3462 HG21 VAL B 18   | -56.154 | 5.634 | 3.890  | 1.00 | 48.03 |     | H0 |
| ANISOU 3462 HG21 VAL B 18 | 6960    | 7280  | 4020   | 850  | -590  | 560 | H0 |
| ATOM 3463 HG22 VAL B 18   | -56.211 | 4.614 | 2.673  | 1.00 | 48.94 |     | H0 |
| ANISOU 3463 HG22 VAL B 18 | 7110    | 7520  | 3960   | 840  | -660  | 490 | H0 |
| ATOM 3464 HG23 VAL B 18   | -55.071 | 4.478 | 3.770  | 1.00 | 47.00 |     | H0 |
| ANISOU 3464 HG23 VAL B 18 | 6810    | 7140  | 3900   | 690  | -490  | 480 | H0 |
| ATOM 3465 N ILE B 19      | -58.356 | 3.488 | 7.640  | 1.00 | 44.24 |     | N0 |
| ANISOU 3465 N ILE B 19    | 5800    | 6970  | 4040   | 640  | -760  | 220 | N0 |
| ATOM 3466 CA ILE B 19     | -59.325 | 2.677 | 8.435  | 1.00 | 43.49 |     | C0 |
| ANISOU 3466 CA ILE B 19   | 5490    | 6990  | 4050   | 580  | -830  | 120 | C0 |
| ATOM 3467 C ILE B 19      | -60.351 | 2.089 | 7.466  | 1.00 | 44.66 |     | C0 |
| ANISOU 3467 C ILE B 19    | 5560    | 7320  | 4090   | 600  | -1000 | 70  | C0 |
| ATOM 3468 O ILE B 19      | -60.983 | 2.826 | 6.719  | 1.00 | 45.08 |     | O0 |
| ANISOU 3468 O ILE B 19    | 5650    | 7450  | 4030   | 760  | -1090 | 130 | O0 |
| ATOM 3469 CB ILE B 19     | -59.971 | 3.505 | 9.569  | 1.00 | 43.09 |     | C0 |
| ANISOU 3469 CB ILE B 19   | 5350    | 6920  | 4110   | 670  | -810  | 160 | C0 |
| ATOM 3470 CG1 ILE B 19    | -60.768 | 2.603 | 10.515 | 1.00 | 42.89 |     | C0 |
| ANISOU 3470 CG1 ILE B 19  | 5110    | 6990  | 4200   | 580  | -850  | 70  | C0 |
| ATOM 3471 CG2 ILE B 19    | -60.829 | 4.642 | 9.025  | 1.00 | 44.98 |     | C0 |
| ANISOU 3471 CG2 ILE B 19  | 5620    | 7210  | 4260   | 880  | -890  | 250 | C0 |
| ATOM 3472 CD1 ILE B 19    | -61.258 | 3.292 | 11.766 | 1.00 | 42.85 |     | C0 |
| ANISOU 3472 CD1 ILE B 19  | 5020    | 6950  | 4310   | 660  | -800  | 100 | C0 |
| ATOM 3473 H ILE B 19      | -58.367 | 4.376 | 7.837  | 1.00 | 44.47 |     | H0 |
| ANISOU 3473 H ILE B 19    | 5880    | 6940  | 4080   | 720  | -730  | 290 | H0 |
| ATOM 3474 HA ILE B 19     | -58.833 | 1.946 | 8.845  | 1.00 | 42.41 |     | H0 |
| ANISOU 3474 HA ILE B 19   | 5330    | 6810  | 3970   | 460  | -780  | 70  | H0 |
| ATOM 3475 HB ILE B 19     | -59.238 | 3.909 | 10.095 | 1.00 | 42.33 |     | H0 |
| ANISOU 3475 HB ILE B 19   | 5330    | 6690  | 4060   | 650  | -720  | 190 | H0 |
| ATOM 3476 HG12 ILE B 19   | -61.543 | 2.248 | 10.030 | 1.00 | 43.93 |     | H0 |
| ANISOU 3476 HG12 ILE B 19 | 5150    | 7250  | 4290   | 600  | -950  | 40  | H0 |
| ATOM 3477 HG13 ILE B 19   | -60.204 | 1.845 | 10.774 | 1.00 | 41.89 |     | H0 |
| ANISOU 3477 HG13 ILE B 19 | 4980    | 6820  | 4120   | 460  | -800  | 20  | H0 |
| ATOM 3478 HG21 ILE B 19   | -60.416 | 5.013 | 8.227  | 1.00 | 45.51 |     | H0 |
| ANISOU 3478 HG21 ILE B 19 | 5820    | 7240  | 4230   | 920  | -890  | 300 | H0 |
| ATOM 3479 HG22 ILE B 19   | -60.910 | 5.339 | 9.699  | 1.00 | 44.82 |     | H0 |
| ANISOU 3479 HG22 ILE B 19 | 5610    | 7130  | 4290   | 950  | -850  | 290 | H0 |
| ATOM 3480 HG23 ILE B 19   | -61.714 | 4.306 | 8.803  | 1.00 | 45.87 |     | H0 |

|                           |         |        |        |      |       |      |    |
|---------------------------|---------|--------|--------|------|-------|------|----|
| ANISOU 3480 HG23 ILE B 19 | 5610    | 7470   | 4350   | 910  | -1000 | 210  | H0 |
| ATOM 3481 HD11 ILE B 19   | -60.500 | 3.653  | 12.258 | 1.00 | 41.87 |      | H0 |
| ANISOU 3481 HD11 ILE B 19 | 4990    | 6700   | 4220   | 640  | -710  | 120  | H0 |
| ATOM 3482 HD12 ILE B 19   | -61.730 | 2.652  | 12.324 | 1.00 | 42.59 |      | H0 |
| ANISOU 3482 HD12 ILE B 19 | 4850    | 6990   | 4340   | 600  | -810  | 40   | H0 |
| ATOM 3483 HD13 ILE B 19   | -61.861 | 4.017  | 11.525 | 1.00 | 43.90 |      | H0 |
| ANISOU 3483 HD13 ILE B 19 | 5150    | 7130   | 4400   | 800  | -840  | 150  | H0 |
| ATOM 3484 N PROB 20       | -60.537 | 0.746  | 7.435  | 1.00 | 44.84 |      | N0 |
| ANISOU 3484 N PROB 20     | 5500    | 7410   | 4130   | 450  | -1050 | -50  | N0 |
| ATOM 3485 CA PROB 20      | -61.407 | 0.101  | 6.452  | 1.00 | 46.89 |      | C0 |
| ANISOU 3485 CA PROB 20    | 5700    | 7840   | 4270   | 440  | -1220 | -120 | C0 |
| ATOM 3486 C PROB 20       | -62.883 | 0.046  | 6.879  | 1.00 | 49.09 |      | C0 |
| ANISOU 3486 C PROB 20     | 5740    | 8300   | 4620   | 460  | -1350 | -150 | C0 |
| ATOM 3487 O PROB 20       | -63.387 | -1.035 | 7.127  | 1.00 | 49.22 |      | O0 |
| ANISOU 3487 O PROB 20     | 5630    | 8390   | 4690   | 300  | -1400 | -250 | O0 |
| ATOM 3488 CB PROB 20      | -60.790 | -1.303 | 6.399  | 1.00 | 45.67 |      | C0 |
| ANISOU 3488 CB PROB 20    | 5600    | 7630   | 4130   | 250  | -1180 | -230 | C0 |
| ATOM 3489 CG PROB 20      | -60.419 | -1.571 | 7.837  | 1.00 | 43.67 |      | C0 |
| ANISOU 3489 CG PROB 20    | 5260    | 7270   | 4060   | 160  | -1050 | -240 | C0 |
| ATOM 3490 CD PROB 20      | -59.907 | -0.234 | 8.336  | 1.00 | 42.90 |      | C0 |
| ANISOU 3490 CD PROB 20    | 5220    | 7080   | 4010   | 290  | -950  | -120 | C0 |
| ATOM 3491 HA PROB 20      | -61.312 | 0.544  | 5.571  | 1.00 | 47.85 |      | H0 |
| ANISOU 3491 HA PROB 20    | 5930    | 7980   | 4270   | 530  | -1250 | -70  | H0 |
| ATOM 3492 HB2 PROB 20     | -61.434 | -1.966 | 6.071  | 1.00 | 46.75 |      | H0 |
| ANISOU 3492 HB2 PROB 20   | 5670    | 7860   | 4230   | 190  | -1290 | -300 | H0 |
| ATOM 3493 HB3 PROB 20     | -59.995 | -1.318 | 5.824  | 1.00 | 45.65 |      | H0 |
| ANISOU 3493 HB3 PROB 20   | 5740    | 7560   | 4050   | 260  | -1120 | -220 | H0 |
| ATOM 3494 HG2 PROB 20     | -61.199 | -1.861 | 8.351  | 1.00 | 43.98 |      | H0 |
| ANISOU 3494 HG2 PROB 20   | 5150    | 7380   | 4170   | 120  | -1100 | -280 | H0 |
| ATOM 3495 HG3 PROB 20     | -59.723 | -2.257 | 7.897  | 1.00 | 42.99 |      | H0 |
| ANISOU 3495 HG3 PROB 20   | 5240    | 7110   | 3990   | 70   | -990  | -290 | H0 |
| ATOM 3496 HD2 PROB 20     | -60.173 | -0.079 | 9.261  | 1.00 | 42.37 |      | H0 |
| ANISOU 3496 HD2 PROB 20   | 5060    | 7000   | 4050   | 280  | -920  | -120 | H0 |
| ATOM 3497 HD3 PROB 20     | -58.936 | -0.189 | 8.273  | 1.00 | 42.19 |      | H0 |
| ANISOU 3497 HD3 PROB 20   | 5240    | 6880   | 3910   | 270  | -850  | -100 | H0 |
| ATOM 3498 N THR B 21      | -63.541 | 1.206  | 6.954  | 1.00 | 51.97 |      | N0 |
| ANISOU 3498 N THR B 21    | 6050    | 8730   | 4970   | 650  | -1380 | -50  | N0 |
| ATOM 3499 CA THR B 21     | -64.992 | 1.331  | 7.257  | 1.00 | 54.96 |      | C0 |
| ANISOU 3499 CA THR B 21   | 6180    | 9310   | 5390   | 710  | -1510 | -60  | C0 |
| ATOM 3500 C THR B 21      | -65.807 | 0.913  | 6.028  | 1.00 | 58.97 |      | C0 |
| ANISOU 3500 C THR B 21    | 6630    | 10020  | 5760   | 720  | -1720 | -100 | C0 |
| ATOM 3501 O THR B 21      | -65.377 | 1.235  | 4.899  | 1.00 | 58.94 |      | O0 |
| ANISOU 3501 O THR B 21    | 6820    | 10000  | 5580   | 800  | -1760 | -70  | O0 |
| ATOM 3502 CB THR B 21     | -65.358 | 2.750  | 7.703  | 1.00 | 55.18 |      | C0 |
| ANISOU 3502 CB THR B 21   | 6200    | 9330   | 5440   | 950  | -1470 | 60   | C0 |
| ATOM 3503 OG1 THR B 21    | -64.983 | 3.658  | 6.669  | 1.00 | 56.31 |      | O0 |
| ANISOU 3503 OG1 THR B 21  | 6550    | 9420   | 5430   | 1120 | -1490 | 160  | O0 |
| ATOM 3504 CG2 THR B 21    | -64.688 | 3.144  | 9.001  | 1.00 | 53.57 |      | C0 |
| ANISOU 3504 CG2 THR B 21  | 6040    | 8930   | 5380   | 940  | -1280 | 90   | C0 |
| ATOM 3505 H THR B 21      | -63.143 | 2.014  | 6.817  | 1.00 | 51.70 |      | H0 |
| ANISOU 3505 H THR B 21    | 6130    | 8610   | 4900   | 750  | -1330 | 30   | H0 |
| ATOM 3506 HA THR B 21     | -65.199 | 0.711  | 7.994  | 1.00 | 54.41 |      | H0 |
| ANISOU 3506 HA THR B 21   | 5980    | 9250   | 5430   | 590  | -1480 | -110 | H0 |
| ATOM 3507 HB THR B 21     | -66.334 | 2.794  | 7.823  | 1.00 | 56.60 |      | H0 |

|                           |         |        |       |      |       |      |    |
|---------------------------|---------|--------|-------|------|-------|------|----|
| ANISOU 3507 HB THR B 21   | 6200    | 9660   | 5640  | 1010 | -1550 | 60   | H0 |
| ATOM 3508 HG21 THR B 21   | -64.998 | 2.561  | 9.717 | 1.00 | 53.00 |      | H0 |
| ANISOU 3508 HG21 THR B 21 | 5830    | 8900   | 5410  | 840  | -1260 | 40   | H0 |
| ATOM 3509 HG22 THR B 21   | -64.913 | 4.067  | 9.216 | 1.00 | 53.92 |      | H0 |
| ANISOU 3509 HG22 THR B 21 | 6110    | 8950   | 5420  | 1090 | -1260 | 160  | H0 |
| ATOM 3510 HG23 THR B 21   | -63.723 | 3.059  | 8.909 | 1.00 | 52.29 |      | H0 |
| ANISOU 3510 HG23 THR B 21 | 6030    | 8630   | 5210  | 870  | -1200 | 90   | H0 |
| ATOM 3511 N GLN B 22      | -66.917 | 0.202  | 6.258 | 1.00 | 62.93 |      | N0 |
| ANISOU 3511 N GLN B 22    | 6870    | 10720  | 6320  | 620  | -1840 | -180 | N0 |
| ATOM 3512 CA GLN B 22     | -67.966 | -0.117 | 5.252 | 1.00 | 68.12 |      | C0 |
| ANISOU 3512 CA GLN B 22   | 7400    | 11630  | 6850  | 620  | -2070 | -220 | C0 |
| ATOM 3513 C GLN B 22      | -69.152 | 0.824  | 5.487 | 1.00 | 71.48 |      | C0 |
| ANISOU 3513 C GLN B 22    | 7600    | 12260  | 7300  | 840  | -2160 | -130 | C0 |
| ATOM 3514 O GLN B 22      | -69.589 | 0.929  | 6.647 | 1.00 | 70.48 |      | O0 |
| ANISOU 3514 O GLN B 22    | 7280    | 12160  | 7340  | 840  | -2070 | -120 | O0 |
| ATOM 3515 CB GLN B 22     | -68.386 | -1.585 | 5.362 | 1.00 | 69.84 |      | C0 |
| ANISOU 3515 CB GLN B 22   | 7470    | 11930  | 7130  | 330  | -2150 | -370 | C0 |
| ATOM 3516 CG GLN B 22     | -67.335 | -2.565 | 4.860 | 1.00 | 69.65 |      | C0 |
| ANISOU 3516 CG GLN B 22   | 7700    | 11730  | 7040  | 150  | -2110 | -460 | C0 |
| ATOM 3517 CD GLN B 22     | -66.998 | -2.355 | 3.402 | 1.00 | 71.69 |      | C0 |
| ANISOU 3517 CD GLN B 22   | 8170    | 12000  | 7070  | 250  | -2220 | -460 | C0 |
| ATOM 3518 OE1 GLN B 22    | -67.845 | -2.493 | 2.521 | 1.00 | 74.70 |      | O0 |
| ANISOU 3518 OE1 GLN B 22  | 8480    | 12580  | 7320  | 260  | -2430 | -500 | O0 |
| ATOM 3519 NE2 GLN B 22    | -65.745 | -2.021 | 3.136 | 1.00 | 70.72 |      | N0 |
| ANISOU 3519 NE2 GLN B 22  | 8320    | 11670  | 6880  | 320  | -2070 | -410 | N0 |
| ATOM 3520 H GLN B 22      | -67.103 | -0.142 | 7.081 | 1.00 | 62.19 |      | H0 |
| ANISOU 3520 H GLN B 22    | 6660    | 10620  | 6350  | 530  | -1790 | -200 | H0 |
| ATOM 3521 HA GLN B 22     | -67.601 | 0.049  | 4.353 | 1.00 | 68.63 |      | H0 |
| ANISOU 3521 HA GLN B 22   | 7630    | 11670  | 6780  | 680  | -2120 | -210 | H0 |
| ATOM 3522 HB2 GLN B 22    | -68.585 | -1.782 | 6.301 | 1.00 | 69.04 |      | H0 |
| ANISOU 3522 HB2 GLN B 22  | 7240    | 11810  | 7170  | 260  | -2080 | -370 | H0 |
| ATOM 3523 HB3 GLN B 22    | -69.211 | -1.711 | 4.849 | 1.00 | 71.80 |      | H0 |
| ANISOU 3523 HB3 GLN B 22  | 7590    | 12360  | 7320  | 330  | -2320 | -390 | H0 |
| ATOM 3524 HG2 GLN B 22    | -66.520 | -2.464 | 5.396 | 1.00 | 67.79 |      | H0 |
| ANISOU 3524 HG2 GLN B 22  | 7570    | 11320  | 6870  | 150  | -1950 | -440 | H0 |
| ATOM 3525 HG3 GLN B 22    | -67.663 | -3.480 | 4.983 | 1.00 | 70.15 |      | H0 |
| ANISOU 3525 HG3 GLN B 22  | 7680    | 11830  | 7150  | -30  | -2160 | -550 | H0 |
| ATOM 3526 HE21 GLN B 22   | -65.348 | -2.336 | 2.411 | 1.00 | 70.92 |      | H0 |
| ANISOU 3526 HE21 GLN B 22 | 8490    | 11670  | 6790  | 300  | -2090 | -450 | H0 |
| ATOM 3527 HE22 GLN B 22   | -65.304 | -1.481 | 3.681 | 1.00 | 69.23 |      | H0 |
| ANISOU 3527 HE22 GLN B 22 | 8160    | 11390  | 6760  | 390  | -1940 | -340 | H0 |
| ATOM 3528 N ARG B 23      | -69.654 | 1.461  | 4.422 | 1.00 | 76.58 |      | N0 |
| ANISOU 3528 N ARG B 23    | 8260    | 13050  | 7780  | 1030 | -2320 | -80  | N0 |
| ATOM 3529 CA ARG B 23     | -70.616 | 2.598  | 4.477 | 1.00 | 80.31 |      | C0 |
| ANISOU 3529 CA ARG B 23   | 8590    | 13690  | 8240  | 1320 | -2390 | 40   | C0 |
| ATOM 3530 C ARG B 23      | -69.963 | 3.724  | 5.292 | 1.00 | 77.68 |      | C0 |
| ANISOU 3530 C ARG B 23    | 8410    | 13130  | 7970  | 1500 | -2180 | 150  | C0 |
| ATOM 3531 O ARG B 23      | -68.714 | 3.844  | 5.238 | 1.00 | 75.99 |      | O0 |
| ANISOU 3531 O ARG B 23    | 8480    | 12660  | 7740  | 1450 | -2030 | 170  | O0 |
| ATOM 3532 CB ARG B 23     | -71.964 | 2.183  | 5.086 | 1.00 | 84.78 |      | C0 |
| ANISOU 3532 CB ARG B 23   | 8750    | 14540  | 8930  | 1270 | -2490 | 0    | C0 |
| ATOM 3533 CG ARG B 23     | -72.360 | 0.725  | 4.890 | 1.00 | 87.97 |      | C0 |
| ANISOU 3533 CG ARG B 23   | 8990    | 15070  | 9360  | 940  | -2610 | -150 | C0 |
| ATOM 3534 CD ARG B 23     | -72.236 | 0.178  | 3.478 | 1.00 | 91.82 |      | C0 |



|                           |         |        |       |      |       |      |    |
|---------------------------|---------|--------|-------|------|-------|------|----|
| ANISOU 3534 CD ARG B 23   | 9620    | 15620  | 9650  | 860  | -2810 | -220 | C0 |
| ATOM 3535 NE ARG B 23     | -71.532 | -1.100 | 3.498 | 1.00 | 92.78 |      | N0 |
| ANISOU 3535 NE ARG B 23   | 9860    | 15590  | 9800  | 540  | -2760 | -360 | N0 |
| ATOM 3536 CZ ARG B 23     | -72.030 | -2.251 | 3.957 | 1.00 | 94.66 |      | C0 |
| ANISOU 3536 CZ ARG B 23   | 9910    | 15900  | 10160 | 260  | -2800 | -480 | C0 |
| ATOM 3537 NH1 ARG B 23    | -73.265 | -2.313 | 4.434 | 1.00 | 97.22 |      | N0 |
| ANISOU 3537 NH1 ARG B 23  | 9870    | 16480  | 10590 | 230  | -2890 | -470 | N0 |
| ATOM 3538 NH2 ARG B 23    | -71.284 | -3.343 | 3.936 | 1.00 | 93.61 |      | N0 |
| ANISOU 3538 NH2 ARG B 23  | 9950    | 15580  | 10040 | 0    | -2740 | -590 | N0 |
| ATOM 3539 H ARG B 23      | -69.430 | 1.225  | 3.571 | 1.00 | 76.88 |      | H0 |
| ANISOU 3539 H ARG B 23    | 8420    | 13100  | 7690  | 1000 | -2400 | -100 | H0 |
| ATOM 3540 HA ARG B 23     | -70.767 | 2.921  | 3.558 | 1.00 | 81.76 |      | H0 |
| ANISOU 3540 HA ARG B 23   | 8840    | 13950  | 8270  | 1430 | -2510 | 70   | H0 |
| ATOM 3541 HB2 ARG B 23    | -71.937 | 2.363  | 6.048 | 1.00 | 83.52 |      | H0 |
| ANISOU 3541 HB2 ARG B 23  | 8530    | 14310  | 8900  | 1280 | -2350 | 20   | H0 |
| ATOM 3542 HB3 ARG B 23    | -72.663 | 2.749  | 4.698 | 1.00 | 86.60 |      | H0 |
| ANISOU 3542 HB3 ARG B 23  | 8880    | 14930  | 9090  | 1450 | -2600 | 60   | H0 |
| ATOM 3543 HG2 ARG B 23    | -71.813 | 0.170  | 5.485 | 1.00 | 86.10 |      | H0 |
| ANISOU 3543 HG2 ARG B 23  | 8810    | 14690  | 9220  | 770  | -2490 | -200 | H0 |
| ATOM 3544 HG3 ARG B 23    | -73.293 | 0.619  | 5.176 | 1.00 | 89.48 |      | H0 |
| ANISOU 3544 HG3 ARG B 23  | 8910    | 15470  | 9620  | 940  | -2690 | -150 | H0 |
| ATOM 3545 HD2 ARG B 23    | -73.130 | 0.057  | 3.092 | 1.00 | 94.07 |      | H0 |
| ANISOU 3545 HD2 ARG B 23  | 9710    | 16140  | 9890  | 860  | -2980 | -240 | H0 |
| ATOM 3546 HD3 ARG B 23    | -71.745 | 0.815  | 2.916 | 1.00 | 91.55 |      | H0 |
| ANISOU 3546 HD3 ARG B 23  | 9790    | 15500  | 9500  | 1020 | -2790 | -160 | H0 |
| ATOM 3547 HE ARG B 23     | -70.713 | -1.111 | 3.199 | 1.00 | 91.43 |      | H0 |
| ANISOU 3547 HE ARG B 23   | 9920    | 15250  | 9570  | 540  | -2690 | -360 | H0 |
| ATOM 3548 HH11 ARG B 23   | -73.769 | -1.596 | 4.457 | 1.00 | 97.81 |      | H0 |
| ANISOU 3548 HH11 ARG B 23 | 9820    | 16690  | 10660 | 410  | -2930 | -390 | H0 |
| ATOM 3549 HH12 ARG B 23   | -73.579 | -3.079 | 4.730 | 1.00 | 97.29 |      | H0 |
| ANISOU 3549 HH12 ARG B 23 | 9750    | 16540  | 10680 | 30   | -2910 | -540 | H0 |
| ATOM 3550 HH21 ARG B 23   | -70.464 | -3.310 | 3.616 | 1.00 | 92.25 |      | H0 |
| ANISOU 3550 HH21 ARG B 23 | 10000   | 15250  | 9790  | 30   | -2670 | -590 | H0 |
| ATOM 3551 HH22 ARG B 23   | -71.613 | -4.106 | 4.231 | 1.00 | 93.87 |      | H0 |
| ANISOU 3551 HH22 ARG B 23 | 9870    | 15650  | 10140 | -190 | -2770 | -660 | H0 |
| ATOM 3552 N ASP B 24      | -70.765 | 4.506  | 6.022 | 1.00 | 76.83 |      | N0 |
| ANISOU 3552 N ASP B 24    | 8130    | 13120  | 7940  | 1700 | -2150 | 230  | N0 |
| ATOM 3553 CA ASP B 24     | -70.288 | 5.404  | 7.110 | 1.00 | 74.56 |      | C0 |
| ANISOU 3553 CA ASP B 24   | 7960    | 12610  | 7760  | 1820 | -1940 | 300  | C0 |
| ATOM 3554 C ASP B 24      | -70.447 | 4.684  | 8.458 | 1.00 | 71.12 |      | C0 |
| ANISOU 3554 C ASP B 24    | 7320    | 12180  | 7530  | 1640 | -1820 | 230  | C0 |
| ATOM 3555 O ASP B 24      | -70.763 | 5.366  | 9.456 | 1.00 | 71.12 |      | O0 |
| ANISOU 3555 O ASP B 24    | 7260    | 12150  | 7620  | 1790 | -1710 | 280  | O0 |
| ATOM 3556 CB ASP B 24     | -71.041 | 6.738  | 7.094 | 1.00 | 77.40 |      | C0 |
| ANISOU 3556 CB ASP B 24   | 8290    | 13050  | 8070  | 2190 | -1970 | 430  | C0 |
| ATOM 3557 CG ASP B 24     | -70.756 | 7.607  | 5.882 | 1.00 | 79.17 |      | C0 |
| ANISOU 3557 CG ASP B 24   | 8780    | 13210  | 8090  | 2390 | -2040 | 530  | C0 |
| ATOM 3558 OD1 ASP B 24    | -69.563 | 7.870  | 5.615 | 1.00 | 78.39 |      | O0 |
| ANISOU 3558 OD1 ASP B 24  | 8990    | 12850  | 7940  | 2340 | -1930 | 560  | O0 |
| ATOM 3559 OD2 ASP B 24    | -71.729 | 8.019  | 5.220 | 1.00 | 81.88 |      | O0 |
| ANISOU 3559 OD2 ASP B 24  | 9000    | 13790  | 8320  | 2620 | -2210 | 590  | O0 |
| ATOM 3560 H ASP B 24      | -71.662 | 4.562  | 5.877 | 1.00 | 78.95 |      | H0 |
| ANISOU 3560 H ASP B 24    | 8210    | 13590  | 8200  | 1780 | -2260 | 240  | H0 |
| ATOM 3561 HA ASP B 24     | -69.331 | 5.588  | 6.964 | 1.00 | 73.04 |      | H0 |

|                           |         |        |        |      |       |      |    |
|---------------------------|---------|--------|--------|------|-------|------|----|
| ANISOU 3561 HA ASP B 24   | 8000    | 12220  | 7540   | 1790 | -1850 | 320  | H0 |
| ATOM 3562 HB2 ASP B 24    | -72.003 | 6.557  | 7.122  | 1.00 | 78.97 |      | H0 |
| ANISOU 3562 HB2 ASP B 24  | 8250    | 13480  | 8280   | 2230 | -2070 | 420  | H0 |
| ATOM 3563 HB3 ASP B 24    | -70.803 | 7.250  | 7.894  | 1.00 | 76.40 |      | H0 |
| ANISOU 3563 HB3 ASP B 24  | 8230    | 12780  | 8020   | 2250 | -1830 | 470  | H0 |
| ATOM 3564 N ARG B 25      | -70.242 | 3.362  | 8.491  | 1.00 | 67.44 |      | N0 |
| ANISOU 3564 N ARG B 25    | 6780    | 11730  | 7120   | 1330 | -1840 | 110  | N0 |
| ATOM 3565 CA ARG B 25     | -70.352 | 2.537  | 9.722  | 1.00 | 65.22 |      | C0 |
| ANISOU 3565 CA ARG B 25   | 6330    | 11440  | 7010   | 1130 | -1730 | 40   | C0 |
| ATOM 3566 C ARG B 25      | -68.965 | 2.390  | 10.340 | 1.00 | 60.19 |      | C0 |
| ANISOU 3566 C ARG B 25    | 5940    | 10490  | 6430   | 1010 | -1550 | 20   | C0 |
| ATOM 3567 O ARG B 25      | -67.956 | 2.411  | 9.639  | 1.00 | 57.63 |      | O0 |
| ANISOU 3567 O ARG B 25    | 5870    | 10010  | 6020   | 980  | -1540 | 20   | O0 |
| ATOM 3568 CB ARG B 25     | -70.994 | 1.176  | 9.431  | 1.00 | 67.17 |      | C0 |
| ANISOU 3568 CB ARG B 25   | 6360    | 11880  | 7290   | 870  | -1870 | -70  | C0 |
| ATOM 3569 CG ARG B 25     | -72.450 | 1.265  | 8.988  | 1.00 | 71.68 |      | C0 |
| ANISOU 3569 CG ARG B 25   | 6610    | 12790  | 7830   | 960  | -2050 | -60  | C0 |
| ATOM 3570 CD ARG B 25     | -73.369 | 0.249  | 9.645  | 1.00 | 73.59 |      | C0 |
| ANISOU 3570 CD ARG B 25   | 6520    | 13230  | 8210   | 730  | -2080 | -130 | C0 |
| ATOM 3571 NE ARG B 25     | -73.124 | 0.092  | 11.078 | 1.00 | 72.74 |      | N0 |
| ANISOU 3571 NE ARG B 25   | 6380    | 12990  | 8270   | 660  | -1860 | -120 | N0 |
| ATOM 3572 CZ ARG B 25     | -73.500 | 0.948  | 12.031 | 1.00 | 73.28 |      | C0 |
| ANISOU 3572 CZ ARG B 25   | 6350    | 13080  | 8410   | 880  | -1730 | -40  | C0 |
| ATOM 3573 NH1 ARG B 25    | -74.149 | 2.062  | 11.732 | 1.00 | 75.14 |      | N0 |
| ANISOU 3573 NH1 ARG B 25  | 6510    | 13460  | 8580   | 1190 | -1790 | 50   | N0 |
| ATOM 3574 NH2 ARG B 25    | -73.213 | 0.685  | 13.295 | 1.00 | 72.09 |      | N0 |
| ANISOU 3574 NH2 ARG B 25  | 6200    | 12800  | 8380   | 790  | -1540 | -50  | N0 |
| ATOM 3575 H ARG B 25      | -70.007 | 2.882  | 7.756  | 1.00 | 68.01 |      | H0 |
| ANISOU 3575 H ARG B 25    | 6920    | 11810  | 7110   | 1240 | -1920 | 70   | H0 |
| ATOM 3576 HA ARG B 25     | -70.927 | 3.019  | 10.359 | 1.00 | 65.77 |      | H0 |
| ANISOU 3576 HA ARG B 25   | 6270    | 11580  | 7140   | 1260 | -1690 | 90   | H0 |
| ATOM 3577 HB2 ARG B 25    | -70.477 | 0.729  | 8.732  | 1.00 | 66.92 |      | H0 |
| ANISOU 3577 HB2 ARG B 25  | 6470    | 11780  | 7180   | 770  | -1920 | -120 | H0 |
| ATOM 3578 HB3 ARG B 25    | -70.939 | 0.627  | 10.240 | 1.00 | 66.34 |      | H0 |
| ANISOU 3578 HB3 ARG B 25  | 6180    | 11730  | 7300   | 730  | -1770 | -110 | H0 |
| ATOM 3579 HG2 ARG B 25    | -72.788 | 2.165  | 9.184  | 1.00 | 72.22 |      | H0 |
| ANISOU 3579 HG2 ARG B 25  | 6640    | 12900  | 7890   | 1190 | -2030 | 30   | H0 |
| ATOM 3580 HG3 ARG B 25    | -72.492 | 1.140  | 8.016  | 1.00 | 72.59 |      | H0 |
| ANISOU 3580 HG3 ARG B 25  | 6780    | 12970  | 7830   | 960  | -2190 | -80  | H0 |
| ATOM 3581 HD2 ARG B 25    | -74.300 | 0.523  | 9.507  | 1.00 | 75.71 |      | H0 |
| ANISOU 3581 HD2 ARG B 25  | 6570    | 13730  | 8480   | 840  | -2180 | -100 | H0 |
| ATOM 3582 HD3 ARG B 25    | -73.247 | -0.620 | 9.206  | 1.00 | 73.72 |      | H0 |
| ANISOU 3582 HD3 ARG B 25  | 6550    | 13250  | 8210   | 530  | -2150 | -210 | H0 |
| ATOM 3583 HE ARG B 25     | -72.697 | -0.625 | 11.333 | 1.00 | 71.54 |      | H0 |
| ANISOU 3583 HE ARG B 25   | 6290    | 12730  | 8160   | 480  | -1810 | -180 | H0 |
| ATOM 3584 HH11 ARG B 25   | -74.347 | 2.250  | 10.899 | 1.00 | 76.23 |      | H0 |
| ANISOU 3584 HH11 ARG B 25 | 6650    | 13690  | 8620   | 1260 | -1920 | 70   | H0 |
| ATOM 3585 HH12 ARG B 25   | -74.389 | 2.612  | 12.373 | 1.00 | 75.21 |      | H0 |
| ANISOU 3585 HH12 ARG B 25 | 6470    | 13470  | 8630   | 1330 | -1700 | 110  | H0 |
| ATOM 3586 HH21 ARG B 25   | -72.779 | -0.053 | 13.503 | 1.00 | 70.80 |      | H0 |
| ANISOU 3586 HH21 ARG B 25 | 6100    | 12540  | 8260   | 590  | -1500 | -100 | H0 |
| ATOM 3587 HH22 ARG B 25   | -73.458 | 1.247  | 13.928 | 1.00 | 72.05 |      | H0 |
| ANISOU 3587 HH22 ARG B 25 | 6150    | 12810  | 8420   | 930  | -1460 | 0    | H0 |
| ATOM 3588 N PRO B 26      | -68.872 | 2.254  | 11.680 | 1.00 | 57.19 |      | N0 |

|                           |         |        |        |      |       |      |    |
|---------------------------|---------|--------|--------|------|-------|------|----|
| ANISOU 3588 N PROB B 26   | 5500    | 10030  | 6200   | 950  | -1400 | 10   | NO |
| ATOM 3589 CA PROB B 26    | -67.580 | 2.063  | 12.337 | 1.00 | 53.84 |      | C0 |
| ANISOU 3589 CA PROB B 26  | 5290    | 9340   | 5830   | 830  | -1230 | -10  | C0 |
| ATOM 3590 C PROB B 26     | -67.017 | 0.666  | 12.043 | 1.00 | 51.65 |      | C0 |
| ANISOU 3590 C PROB B 26   | 5050    | 9020   | 5560   | 550  | -1250 | -110 | C0 |
| ATOM 3591 O PROB B 26     | -67.787 | -0.220 | 11.712 | 1.00 | 53.09 |      | O0 |
| ANISOU 3591 O PROB B 26   | 5050    | 9370   | 5750   | 420  | -1360 | -180 | O0 |
| ATOM 3592 CB PROB B 26    | -67.897 | 2.238  | 13.830 | 1.00 | 53.59 |      | C0 |
| ANISOU 3592 CB PROB B 26  | 5150    | 9290   | 5930   | 860  | -1100 | 0    | C0 |
| ATOM 3593 CG PROB B 26    | -69.369 | 1.881  | 13.952 | 1.00 | 55.93 |      | C0 |
| ANISOU 3593 CG PROB B 26  | 5110    | 9870   | 6270   | 870  | -1180 | -10  | C0 |
| ATOM 3594 CD PROB B 26    | -69.996 | 2.264  | 12.628 | 1.00 | 58.14 |      | C0 |
| ANISOU 3594 CD PROB B 26  | 5340    | 10330  | 6420   | 1000 | -1370 | 20   | C0 |
| ATOM 3595 HA PROB B 26    | -66.945 | 2.764  | 12.043 | 1.00 | 53.29 |      | H0 |
| ANISOU 3595 HA PROB B 26  | 5410    | 9140   | 5700   | 930  | -1200 | 40   | H0 |
| ATOM 3596 HB2 PROB B 26   | -67.347 | 1.639  | 14.379 | 1.00 | 52.18 |      | H0 |
| ANISOU 3596 HB2 PROB B 26 | 5010    | 9010   | 5810   | 710  | -1020 | -40  | H0 |
| ATOM 3597 HB3 PROB B 26   | -67.739 | 3.161  | 14.116 | 1.00 | 53.42 |      | H0 |
| ANISOU 3597 HB3 PROB B 26 | 5220    | 9190   | 5890   | 1020 | -1040 | 60   | H0 |
| ATOM 3598 HG2 PROB B 26   | -69.479 | 0.923  | 14.120 | 1.00 | 55.76 |      | H0 |
| ANISOU 3598 HG2 PROB B 26 | 4990    | 9890   | 6300   | 670  | -1190 | -70  | H0 |
| ATOM 3599 HG3 PROB B 26   | -69.785 | 2.377  | 14.687 | 1.00 | 56.28 |      | H0 |
| ANISOU 3599 HG3 PROB B 26 | 5080    | 9940   | 6360   | 980  | -1110 | 30   | H0 |
| ATOM 3600 HD2 PROB B 26   | -70.679 | 1.619  | 12.366 | 1.00 | 59.44 |      | H0 |
| ANISOU 3600 HD2 PROB B 26 | 5310    | 10670  | 6600   | 900  | -1460 | -20  | H0 |
| ATOM 3601 HD3 PROB B 26   | -70.402 | 3.150  | 12.677 | 1.00 | 59.13 |      | H0 |
| ANISOU 3601 HD3 PROB B 26 | 5440    | 10500  | 6520   | 1210 | -1370 | 90   | H0 |
| ATOM 3602 N VAL B 27      | -65.698 | 0.505  | 12.160 | 1.00 | 48.16 |      | NO |
| ANISOU 3602 N VAL B 27    | 4830    | 8350   | 5120   | 470  | -1150 | -120 | NO |
| ATOM 3603 CA VAL B 27     | -65.038 | -0.832 | 12.188 | 1.00 | 46.57 |      | C0 |
| ANISOU 3603 CA VAL B 27   | 4680    | 8070   | 4940   | 230  | -1120 | -220 | C0 |
| ATOM 3604 C VAL B 27      | -65.277 | -1.419 | 13.579 | 1.00 | 44.82 |      | C0 |
| ANISOU 3604 C VAL B 27    | 4330    | 7830   | 4870   | 120  | -1010 | -250 | C0 |
| ATOM 3605 O VAL B 27      | -64.890 | -0.771 | 14.564 | 1.00 | 42.43 |      | O0 |
| ANISOU 3605 O VAL B 27    | 4070    | 7420   | 4630   | 200  | -890  | -200 | O0 |
| ATOM 3606 CB VAL B 27     | -63.535 | -0.761 | 11.848 | 1.00 | 45.21 |      | C0 |
| ANISOU 3606 CB VAL B 27   | 4770    | 7690   | 4720   | 210  | -1030 | -210 | C0 |
| ATOM 3607 CG1 VAL B 27    | -62.900 | -2.142 | 11.859 | 1.00 | 44.40 |      | C0 |
| ANISOU 3607 CG1 VAL B 27  | 4730    | 7510   | 4640   | 0    | -1000 | -300 | C0 |
| ATOM 3608 CG2 VAL B 27    | -63.292 | -0.077 | 10.513 | 1.00 | 46.33 |      | C0 |
| ANISOU 3608 CG2 VAL B 27  | 5060    | 7840   | 4710   | 340  | -1110 | -160 | C0 |
| ATOM 3609 H VAL B 27      | -65.121 | 1.204  | 12.242 | 1.00 | 47.69 |      | H0 |
| ANISOU 3609 H VAL B 27    | 4900    | 8180   | 5040   | 560  | -1080 | -70  | H0 |
| ATOM 3610 HA VAL B 27     | -65.475 | -1.403 | 11.531 | 1.00 | 47.59 |      | H0 |
| ANISOU 3610 HA VAL B 27   | 4750    | 8300   | 5030   | 160  | -1220 | -260 | H0 |
| ATOM 3611 HB VAL B 27     | -63.097 | -0.220 | 12.550 | 1.00 | 44.23 |      | H0 |
| ANISOU 3611 HB VAL B 27   | 4700    | 7460   | 4650   | 260  | -930  | -160 | H0 |
| ATOM 3612 HG11 VAL B 27   | -62.808 | -2.452 | 12.777 | 1.00 | 43.58 |      | H0 |
| ANISOU 3612 HG11 VAL B 27 | 4580    | 7350   | 4630   | -60  | -920  | -310 | H0 |
| ATOM 3613 HG12 VAL B 27   | -62.021 | -2.100 | 11.444 | 1.00 | 43.73 |      | H0 |
| ANISOU 3613 HG12 VAL B 27 | 4790    | 7320   | 4500   | 10   | -960  | -290 | H0 |
| ATOM 3614 HG13 VAL B 27   | -63.462 | -2.762 | 11.363 | 1.00 | 45.46 |      | H0 |
| ANISOU 3614 HG13 VAL B 27 | 4800    | 7740   | 4740   | -70  | -1090 | -350 | H0 |
| ATOM 3615 HG21 VAL B 27   | -63.832 | -0.504 | 9.826  | 1.00 | 47.45 |      | H0 |

|                           |         |        |        |      |       |      |    |
|---------------------------|---------|--------|--------|------|-------|------|----|
| ANISOU 3615 HG21 VAL B 27 | 5140    | 8100   | 4790   | 310  | -1220 | -200 | H0 |
| ATOM 3616 HG22 VAL B 27   | -62.351 | -0.149 | 10.277 | 1.00 | 45.37 |      | H0 |
| ANISOU 3616 HG22 VAL B 27 | 5080    | 7600   | 4550   | 300  | -1040 | -150 | H0 |
| ATOM 3617 HG23 VAL B 27   | -63.537 | 0.862  | 10.579 | 1.00 | 46.67 |      | H0 |
| ANISOU 3617 HG23 VAL B 27 | 5100    | 7890   | 4740   | 480  | -1100 | -90  | H0 |
| ATOM 3618 N ALA B 28      | -65.933 | -2.578 | 13.637 | 1.00 | 45.85 |      | N0 |
| ANISOU 3618 N ALA B 28    | 4310    | 8060   | 5040   | -70  | -1070 | -320 | N0 |
| ATOM 3619 CA ALA B 28     | -66.270 | -3.314 | 14.877 | 1.00 | 45.75 |      | C0 |
| ANISOU 3619 CA ALA B 28   | 4170    | 8050   | 5160   | -210 | -970  | -350 | C0 |
| ATOM 3620 C ALA B 28      | -65.040 | -4.109 | 15.319 | 1.00 | 44.01 |      | C0 |
| ANISOU 3620 C ALA B 28    | 4140    | 7610   | 4970   | -340 | -860  | -390 | C0 |
| ATOM 3621 O ALA B 28      | -64.761 | -5.160 | 14.715 | 1.00 | 45.12 |      | O0 |
| ANISOU 3621 O ALA B 28    | 4360    | 7710   | 5080   | -500 | -910  | -460 | O0 |
| ATOM 3622 CB ALA B 28     | -67.465 | -4.210 | 14.643 | 1.00 | 47.40 |      | C0 |
| ANISOU 3622 CB ALA B 28   | 4160    | 8450   | 5400   | -370 | -1080 | -410 | C0 |
| ATOM 3623 H ALA B 28      | -66.225 | -3.014 | 12.892 | 1.00 | 46.84 |      | H0 |
| ANISOU 3623 H ALA B 28    | 4410    | 8260   | 5120   | -130 | -1170 | -360 | H0 |
| ATOM 3624 HA ALA B 28     | -66.492 | -2.662 | 15.578 | 1.00 | 45.52 |      | H0 |
| ANISOU 3624 HA ALA B 28   | 4090    | 8030   | 5180   | -100 | -910  | -300 | H0 |
| ATOM 3625 HB1 ALA B 28    | -67.663 | -4.706 | 15.456 | 1.00 | 47.40 |      | H0 |
| ANISOU 3625 HB1 ALA B 28  | 4080    | 8440   | 5490   | -470 | -1010 | -420 | H0 |
| ATOM 3626 HB2 ALA B 28    | -68.234 | -3.669 | 14.400 | 1.00 | 48.84 |      | H0 |
| ANISOU 3626 HB2 ALA B 28  | 4200    | 8790   | 5570   | -270 | -1150 | -380 | H0 |
| ATOM 3627 HB3 ALA B 28    | -67.269 | -4.834 | 13.925 | 1.00 | 47.83 |      | H0 |
| ANISOU 3627 HB3 ALA B 28  | 4280    | 8490   | 5410   | -470 | -1150 | -470 | H0 |
| ATOM 3628 N VAL B 29      | -64.317 | -3.601 | 16.315 | 1.00 | 42.44 |      | N0 |
| ANISOU 3628 N VAL B 29    | 4030    | 7270   | 4820   | -270 | -730  | -340 | N0 |
| ATOM 3629 CA VAL B 29     | -63.100 | -4.252 | 16.871 | 1.00 | 41.40 |      | C0 |
| ANISOU 3629 CA VAL B 29   | 4070    | 6950   | 4720   | -360 | -620  | -370 | C0 |
| ATOM 3630 C VAL B 29      | -63.500 | -4.977 | 18.158 | 1.00 | 42.14 |      | C0 |
| ANISOU 3630 C VAL B 29    | 4060    | 7030   | 4920   | -470 | -530  | -380 | C0 |
| ATOM 3631 O VAL B 29      | -63.983 | -4.313 | 19.090 | 1.00 | 41.98 |      | O0 |
| ANISOU 3631 O VAL B 29    | 3950    | 7060   | 4940   | -380 | -460  | -330 | O0 |
| ATOM 3632 CB VAL B 29     | -61.976 | -3.227 | 17.107 | 1.00 | 39.90 |      | C0 |
| ANISOU 3632 CB VAL B 29   | 4040    | 6620   | 4510   | -220 | -540  | -310 | C0 |
| ATOM 3633 CG1 VAL B 29    | -60.705 | -3.893 | 17.607 | 1.00 | 38.45 |      | C0 |
| ANISOU 3633 CG1 VAL B 29  | 4000    | 6270   | 4350   | -310 | -450  | -330 | C0 |
| ATOM 3634 CG2 VAL B 29    | -61.701 | -2.408 | 15.854 | 1.00 | 40.44 |      | C0 |
| ANISOU 3634 CG2 VAL B 29  | 4200    | 6700   | 4470   | -110 | -620  | -270 | C0 |
| ATOM 3635 H VAL B 29      | -64.525 | -2.813 | 16.723 | 1.00 | 42.59 |      | H0 |
| ANISOU 3635 H VAL B 29    | 4020    | 7310   | 4860   | -150 | -700  | -290 | H0 |
| ATOM 3636 HA VAL B 29     | -62.784 | -4.911 | 16.229 | 1.00 | 41.49 |      | H0 |
| ANISOU 3636 HA VAL B 29   | 4150    | 6930   | 4690   | -440 | -660  | -410 | H0 |
| ATOM 3637 HB VAL B 29     | -62.286 | -2.606 | 17.811 | 1.00 | 39.93 |      | H0 |
| ANISOU 3637 HB VAL B 29   | 3990    | 6630   | 4550   | -150 | -500  | -270 | H0 |
| ATOM 3638 HG11 VAL B 29   | -60.833 | -4.194 | 18.523 | 1.00 | 38.17 |      | H0 |
| ANISOU 3638 HG11 VAL B 29 | 3920    | 6210   | 4370   | -350 | -390  | -330 | H0 |
| ATOM 3639 HG12 VAL B 29   | -59.970 | -3.256 | 17.576 | 1.00 | 37.73 |      | H0 |
| ANISOU 3639 HG12 VAL B 29 | 4000    | 6100   | 4230   | -240 | -420  | -290 | H0 |
| ATOM 3640 HG13 VAL B 29   | -60.494 | -4.657 | 17.042 | 1.00 | 38.59 |      | H0 |
| ANISOU 3640 HG13 VAL B 29 | 4060    | 6270   | 4340   | -390 | -480  | -370 | H0 |
| ATOM 3641 HG21 VAL B 29   | -61.559 | -3.005 | 15.100 | 1.00 | 40.70 |      | H0 |
| ANISOU 3641 HG21 VAL B 29 | 4270    | 6740   | 4450   | -180 | -670  | -310 | H0 |
| ATOM 3642 HG22 VAL B 29   | -60.907 | -1.863 | 15.989 | 1.00 | 39.54 |      | H0 |

|                           |         |        |        |       |       |      |    |
|---------------------------|---------|--------|--------|-------|-------|------|----|
| ANISOU 3642 HG22 VAL B 29 | 4190    | 6480   | 4350   | -60   | -560  | -240 | H0 |
| ATOM 3643 HG23 VAL B 29   | -62.462 | -1.829 | 15.670 | 1.00  | 41.34 |      | H0 |
| ANISOU 3643 HG23 VAL B 29 | 4230    | 6910   | 4570   | -20   | -670  | -250 | H0 |
| ATOM 3644 N SER B 30      | -63.340 | -6.298 | 18.183 | 1.00  | 42.97 |      | N0 |
| ANISOU 3644 N SER B 30    | 4200    | 7080   | 5040   | -650  | -520  | -440 | N0 |
| ATOM 3645 CA SER B 30     | -63.431 | -7.124 | 19.411 | 1.00  | 43.36 |      | C0 |
| ANISOU 3645 CA SER B 30   | 4230    | 7070   | 5180   | -770  | -410  | -450 | C0 |
| ATOM 3646 C SER B 30      | -62.076 | -7.103 | 20.122 | 1.00  | 41.58 |      | C0 |
| ANISOU 3646 C SER B 30    | 4190    | 6660   | 4950   | -720  | -300  | -420 | C0 |
| ATOM 3647 O SER B 30      | -61.077 | -7.478 | 19.483 | 1.00  | 39.69 |      | O0 |
| ANISOU 3647 O SER B 30    | 4100    | 6310   | 4660   | -740  | -320  | -450 | O0 |
| ATOM 3648 CB SER B 30     | -63.857 | -8.512 | 19.088 | 1.00  | 44.31 |      | C0 |
| ANISOU 3648 CB SER B 30   | 4330    | 7190   | 5310   | -990  | -450  | -520 | C0 |
| ATOM 3649 OG SER B 30     | -65.069 | -8.484 | 18.364 | 1.00  | 47.76 |      | O0 |
| ANISOU 3649 OG SER B 30   | 4590    | 7820   | 5740   | -1040 | -570  | -540 | O0 |
| ATOM 3650 H SER B 30      | -63.161 | -6.796 | 17.441 | 1.00  | 43.22 |      | H0 |
| ANISOU 3650 H SER B 30    | 4290    | 7100   | 5030   | -720  | -570  | -480 | H0 |
| ATOM 3651 HA SER B 30     | -64.107 | -6.716 | 20.010 | 1.00  | 43.75 |      | H0 |
| ANISOU 3651 HA SER B 30   | 4150    | 7200   | 5270   | -730  | -380  | -410 | H0 |
| ATOM 3652 HB2 SER B 30    | -63.162 | -8.954 | 18.557 | 1.00  | 44.31 |      | H0 |
| ANISOU 3652 HB2 SER B 30  | 4470    | 7100   | 5270   | -1020 | -470  | -550 | H0 |
| ATOM 3653 HB3 SER B 30    | -63.981 | -9.017 | 19.917 | 1.00  | 44.82 |      | H0 |
| ANISOU 3653 HB3 SER B 30  | 4380    | 7220   | 5430   | -1060 | -370  | -510 | H0 |
| ATOM 3654 N VAL B 31      | -62.056 | -6.644 | 21.377 | 1.00  | 41.93 |      | N0 |
| ANISOU 3654 N VAL B 31    | 4210    | 6680   | 5040   | -660  | -200  | -380 | N0 |
| ATOM 3655 CA VAL B 31     | -60.863 | -6.676 | 22.274 | 1.00  | 41.20 |      | C0 |
| ANISOU 3655 CA VAL B 31   | 4270    | 6430   | 4960   | -620  | -110  | -360 | C0 |
| ATOM 3656 C VAL B 31      | -61.220 | -7.497 | 23.516 | 1.00  | 42.37 |      | C0 |
| ANISOU 3656 C VAL B 31    | 4380    | 6550   | 5160   | -710  | -10   | -350 | C0 |
| ATOM 3657 O VAL B 31      | -62.264 | -7.219 | 24.137 | 1.00  | 43.20 |      | O0 |
| ANISOU 3657 O VAL B 31    | 4350    | 6770   | 5300   | -700  | 20    | -320 | O0 |
| ATOM 3658 CB VAL B 31     | -60.381 | -5.264 | 22.662 | 1.00  | 40.85 |      | C0 |
| ANISOU 3658 CB VAL B 31   | 4260    | 6360   | 4890   | -460  | -90   | -310 | C0 |
| ATOM 3659 CG1 VAL B 31    | -58.972 | -5.303 | 23.235 | 1.00  | 40.27 |      | C0 |
| ANISOU 3659 CG1 VAL B 31  | 4350    | 6140   | 4810   | -440  | -30   | -300 | C0 |
| ATOM 3660 CG2 VAL B 31    | -60.448 | -4.292 | 21.498 | 1.00  | 40.98 |      | C0 |
| ANISOU 3660 CG2 VAL B 31  | 4280    | 6430   | 4860   | -360  | -180  | -290 | C0 |
| ATOM 3661 H VAL B 31      | -62.788 | -6.273 | 21.772 | 1.00  | 42.49 |      | H0 |
| ANISOU 3661 H VAL B 31    | 4170    | 6840   | 5140   | -620  | -190  | -350 | H0 |
| ATOM 3662 HA VAL B 31     | -60.142 | -7.125 | 21.805 | 1.00  | 40.86 |      | H0 |
| ANISOU 3662 HA VAL B 31   | 4320    | 6320   | 4890   | -660  | -120  | -380 | H0 |
| ATOM 3663 HB VAL B 31     | -60.986 | -4.929 | 23.370 | 1.00  | 41.26 |      | H0 |
| ANISOU 3663 HB VAL B 31   | 4240    | 6460   | 4970   | -420  | -50   | -290 | H0 |
| ATOM 3664 HG11 VAL B 31   | -58.967 | -5.826 | 24.055 | 1.00  | 39.97 |      | H0 |
| ANISOU 3664 HG11 VAL B 31 | 4310    | 6070   | 4800   | -480  | 20    | -300 | H0 |
| ATOM 3665 HG12 VAL B 31   | -58.674 | -4.397 | 23.428 | 1.00  | 39.68 |      | H0 |
| ANISOU 3665 HG12 VAL B 31 | 4300    | 6050   | 4720   | -350  | -30   | -270 | H0 |
| ATOM 3666 HG13 VAL B 31   | -58.369 | -5.710 | 22.589 | 1.00  | 39.75 |      | H0 |
| ANISOU 3666 HG13 VAL B 31 | 4340    | 6040   | 4720   | -480  | -60   | -310 | H0 |
| ATOM 3667 HG21 VAL B 31   | -60.034 | -4.695 | 20.715 | 1.00  | 40.90 |      | H0 |
| ANISOU 3667 HG21 VAL B 31 | 4320    | 6400   | 4820   | -400  | -220  | -320 | H0 |
| ATOM 3668 HG22 VAL B 31   | -59.975 | -3.474 | 21.730 | 1.00  | 40.49 |      | H0 |
| ANISOU 3668 HG22 VAL B 31 | 4280    | 6320   | 4780   | -270  | -160  | -260 | H0 |
| ATOM 3669 HG23 VAL B 31   | -61.378 | -4.083 | 21.302 | 1.00  | 41.95 |      | H0 |

|                           |         |         |        |       |       |      |    |
|---------------------------|---------|---------|--------|-------|-------|------|----|
| ANISOU 3669 HG23 VAL B 31 | 4290    | 6660    | 4990   | -340  | -210  | -290 | H0 |
| ATOM 3670 N SER B 32      | -60.383 | -8.479  | 23.849 | 1.00  | 42.31 |      | N0 |
| ANISOU 3670 N SER B 32    | 4510    | 6410    | 5150   | -790  | 40    | -360 | N0 |
| ATOM 3671 CA SER B 32     | -60.421 | -9.239  | 25.122 | 1.00  | 42.52 |      | C0 |
| ANISOU 3671 CA SER B 32   | 4570    | 6380    | 5210   | -850  | 140   | -340 | C0 |
| ATOM 3672 C SER B 32      | -58.981 | -9.515  | 25.547 | 1.00  | 41.09 |      | C0 |
| ANISOU 3672 C SER B 32    | 4570    | 6050    | 5000   | -800  | 180   | -330 | C0 |
| ATOM 3673 O SER B 32      | -58.168 | -9.863  | 24.672 | 1.00  | 41.09 |      | O0 |
| ANISOU 3673 O SER B 32    | 4660    | 5980    | 4970   | -800  | 130   | -360 | O0 |
| ATOM 3674 CB SER B 32     | -61.216 | -10.512 | 24.990 | 1.00  | 45.01 |      | C0 |
| ANISOU 3674 CB SER B 32   | 4850    | 6700    | 5560   | -1040 | 150   | -370 | C0 |
| ATOM 3675 OG SER B 32     | -60.480 | -11.503 | 24.282 | 1.00  | 46.46 |      | O0 |
| ANISOU 3675 OG SER B 32   | 5180    | 6760    | 5710   | -1110 | 120   | -420 | O0 |
| ATOM 3676 H SER B 32      | -59.714 | -8.765  | 23.300 | 1.00  | 41.80 |      | H0 |
| ANISOU 3676 H SER B 32    | 4540    | 6290    | 5060   | -800  | 10    | -390 | H0 |
| ATOM 3677 HA SER B 32     | -60.849 | -8.667  | 25.812 | 1.00  | 42.79 |      | H0 |
| ANISOU 3677 HA SER B 32   | 4540    | 6460    | 5260   | -790  | 180   | -310 | H0 |
| ATOM 3678 HB2 SER B 32    | -61.443 | -10.850 | 25.885 | 1.00  | 45.44 |      | H0 |
| ANISOU 3678 HB2 SER B 32  | 4900    | 6730    | 5640   | -1070 | 230   | -340 | H0 |
| ATOM 3679 HB3 SER B 32    | -62.056 | -10.324 | 24.512 | 1.00  | 46.02 |      | H0 |
| ANISOU 3679 HB3 SER B 32  | 4850    | 6930    | 5700   | -1070 | 100   | -380 | H0 |
| ATOM 3680 N LEU B 33      | -58.670 | -9.330  | 26.829 | 1.00  | 39.11 |      | N0 |
| ANISOU 3680 N LEU B 33    | 4360    | 5750    | 4750   | -740  | 260   | -290 | N0 |
| ATOM 3681 CA LEU B 33     | -57.347 | -9.683  | 27.398 | 1.00  | 37.78 |      | C0 |
| ANISOU 3681 CA LEU B 33   | 4340    | 5470    | 4550   | -700  | 290   | -280 | C0 |
| ATOM 3682 C LEU B 33      | -57.424 | -11.096 | 27.983 | 1.00  | 37.89 |      | C0 |
| ANISOU 3682 C LEU B 33    | 4440    | 5390    | 4570   | -790  | 360   | -270 | C0 |
| ATOM 3683 O LEU B 33      | -58.407 | -11.405 | 28.668 | 1.00  | 38.81 |      | O0 |
| ANISOU 3683 O LEU B 33    | 4500    | 5540    | 4710   | -860  | 420   | -250 | O0 |
| ATOM 3684 CB LEU B 33     | -56.955 | -8.648  | 28.454 | 1.00  | 37.55 |      | C0 |
| ANISOU 3684 CB LEU B 33   | 4330    | 5440    | 4500   | -580  | 310   | -240 | C0 |
| ATOM 3685 CG LEU B 33     | -57.001 | -7.193  | 27.994 | 1.00  | 37.77 |      | C0 |
| ANISOU 3685 CG LEU B 33   | 4300    | 5530    | 4520   | -490  | 250   | -240 | C0 |
| ATOM 3686 CD1 LEU B 33    | -56.351 | -6.282  | 29.028 | 1.00  | 37.71 |      | C0 |
| ANISOU 3686 CD1 LEU B 33  | 4360    | 5490    | 4480   | -390  | 270   | -220 | C0 |
| ATOM 3687 CD2 LEU B 33    | -56.329 | -7.019  | 26.640 | 1.00  | 37.52 |      | C0 |
| ANISOU 3687 CD2 LEU B 33  | 4280    | 5490    | 4480   | -490  | 180   | -260 | C0 |
| ATOM 3688 H LEU B 33      | -59.254 | -8.978  | 27.433 | 1.00  | 39.70 |      | H0 |
| ANISOU 3688 H LEU B 33    | 4370    | 5880    | 4830   | -720  | 290   | -270 | H0 |
| ATOM 3689 HA LEU B 33     | -56.685 | -9.676  | 26.674 | 1.00  | 37.39 |      | H0 |
| ANISOU 3689 HA LEU B 33   | 4330    | 5390    | 4480   | -680  | 240   | -290 | H0 |
| ATOM 3690 HB2 LEU B 33    | -57.554 | -8.750  | 29.221 | 1.00  | 38.11 |      | H0 |
| ANISOU 3690 HB2 LEU B 33  | 4370    | 5530    | 4580   | -590  | 370   | -220 | H0 |
| ATOM 3691 HB3 LEU B 33    | -56.048 | -8.849  | 28.759 | 1.00  | 37.16 |      | H0 |
| ANISOU 3691 HB3 LEU B 33  | 4360    | 5330    | 4430   | -550  | 310   | -230 | H0 |
| ATOM 3692 HG LEU B 33     | -57.949 | -6.928  | 27.901 | 1.00  | 38.32 |      | H0 |
| ANISOU 3692 HG LEU B 33   | 4280    | 5670    | 4610   | -490  | 260   | -240 | H0 |
| ATOM 3693 HD11 LEU B 33   | -56.678 | -6.514  | 29.915 | 1.00  | 37.93 |      | H0 |
| ANISOU 3693 HD11 LEU B 33 | 4400    | 5520    | 4500   | -390  | 320   | -210 | H0 |
| ATOM 3694 HD12 LEU B 33   | -56.576 | -5.356  | 28.832 | 1.00  | 37.58 |      | H0 |
| ANISOU 3694 HD12 LEU B 33 | 4310    | 5500    | 4460   | -340  | 240   | -220 | H0 |
| ATOM 3695 HD13 LEU B 33   | -55.385 | -6.395  | 28.999 | 1.00  | 37.09 |      | H0 |
| ANISOU 3695 HD13 LEU B 33 | 4340    | 5360    | 4390   | -390  | 250   | -220 | H0 |
| ATOM 3696 HD21 LEU B 33   | -55.523 | -7.563  | 26.606 | 1.00  | 37.12 |      | H0 |

|                           |         |         |        |       |       |      |    |
|---------------------------|---------|---------|--------|-------|-------|------|----|
| ANISOU 3696 HD21 LEU B 33 | 4300    | 5390    | 4420   | -500  | 180   | -270 | H0 |
| ATOM 3697 HD22 LEU B 33   | -56.094 | -6.085  | 26.511 | 1.00  | 37.14 |      | H0 |
| ANISOU 3697 HD22 LEU B 33 | 4240    | 5460    | 4420   | -430  | 150   | -250 | H0 |
| ATOM 3698 HD23 LEU B 33   | -56.939 | -7.300  | 25.936 | 1.00  | 37.90 |      | H0 |
| ANISOU 3698 HD23 LEU B 33 | 4280    | 5580    | 4540   | -530  | 150   | -280 | H0 |
| ATOM 3699 N LYS B 34      | -56.430 | -11.929 | 27.680 | 1.00  | 37.18 |      | N0 |
| ANISOU 3699 N LYS B 34    | 4480    | 5190    | 4460   | -790  | 350   | -280 | N0 |
| ATOM 3700 CA LYS B 34     | -56.224 | -13.254 | 28.314 | 1.00  | 37.88 |      | C0 |
| ANISOU 3700 CA LYS B 34   | 4700    | 5160    | 4530   | -840  | 430   | -260 | C0 |
| ATOM 3701 C LYS B 34      | -54.944 | -13.144 | 29.147 | 1.00  | 35.64 |      | C0 |
| ANISOU 3701 C LYS B 34    | 4510    | 4820    | 4210   | -710  | 440   | -220 | C0 |
| ATOM 3702 O LYS B 34      | -53.870 | -12.927 | 28.559 | 1.00  | 33.88 |      | O0 |
| ANISOU 3702 O LYS B 34    | 4320    | 4590    | 3960   | -620  | 390   | -230 | O0 |
| ATOM 3703 CB LYS B 34     | -56.159 | -14.338 | 27.233 | 1.00  | 40.04 |      | C0 |
| ANISOU 3703 CB LYS B 34   | 5060    | 5350    | 4800   | -930  | 400   | -310 | C0 |
| ATOM 3704 CG LYS B 34     | -56.619 | -15.720 | 27.666 | 1.00  | 42.91 |      | C0 |
| ANISOU 3704 CG LYS B 34   | 5540    | 5590    | 5180   | -1060 | 480   | -310 | C0 |
| ATOM 3705 CD LYS B 34     | -58.111 | -15.821 | 27.913 | 1.00  | 45.13 |      | C0 |
| ANISOU 3705 CD LYS B 34   | 5700    | 5940    | 5510   | -1220 | 500   | -310 | C0 |
| ATOM 3706 CE LYS B 34     | -58.552 | -17.241 | 28.199 | 1.00  | 47.63 |      | C0 |
| ANISOU 3706 CE LYS B 34   | 6140    | 6120    | 5840   | -1380 | 580   | -300 | C0 |
| ATOM 3707 NZ LYS B 34     | -59.851 | -17.288 | 28.912 | 1.00  | 49.67 |      | N0 |
| ANISOU 3707 NZ LYS B 34   | 6270    | 6450    | 6150   | -1530 | 650   | -260 | N0 |
| ATOM 3708 H LYS B 34      | -55.803 | -11.730 | 27.050 | 1.00  | 36.82 |      | H0 |
| ANISOU 3708 H LYS B 34    | 4460    | 5140    | 4390   | -750  | 310   | -300 | H0 |
| ATOM 3709 HA LYS B 34     | -56.981 | -13.441 | 28.914 | 1.00  | 38.50 |      | H0 |
| ANISOU 3709 HA LYS B 34   | 4750    | 5250    | 4630   | -900  | 480   | -240 | H0 |
| ATOM 3710 HB2 LYS B 34    | -56.712 | -14.051 | 26.477 | 1.00  | 40.20 |      | H0 |
| ANISOU 3710 HB2 LYS B 34  | 5000    | 5440    | 4840   | -980  | 350   | -350 | H0 |
| ATOM 3711 HB3 LYS B 34    | -55.235 | -14.405 | 26.916 | 1.00  | 39.54 |      | H0 |
| ANISOU 3711 HB3 LYS B 34  | 5070    | 5240    | 4710   | -850  | 380   | -320 | H0 |
| ATOM 3712 HG2 LYS B 34    | -56.370 | -16.363 | 26.970 | 1.00  | 43.20 |      | H0 |
| ANISOU 3712 HG2 LYS B 34  | 5660    | 5550    | 5200   | -1090 | 460   | -350 | H0 |
| ATOM 3713 HG3 LYS B 34    | -56.143 | -15.968 | 28.487 | 1.00  | 42.72 |      | H0 |
| ANISOU 3713 HG3 LYS B 34  | 5590    | 5510    | 5130   | -1000 | 530   | -260 | H0 |
| ATOM 3714 HD2 LYS B 34    | -58.350 | -15.252 | 28.675 | 1.00  | 44.80 |      | H0 |
| ANISOU 3714 HD2 LYS B 34  | 5580    | 5960    | 5480   | -1180 | 540   | -260 | H0 |
| ATOM 3715 HD3 LYS B 34    | -58.591 | -15.490 | 27.124 | 1.00  | 45.20 |      | H0 |
| ANISOU 3715 HD3 LYS B 34  | 5610    | 6030    | 5530   | -1270 | 440   | -350 | H0 |
| ATOM 3716 HE2 LYS B 34    | -58.635 | -17.731 | 27.359 | 1.00  | 48.18 |      | H0 |
| ANISOU 3716 HE2 LYS B 34  | 6260    | 6140    | 5910   | -1460 | 530   | -360 | H0 |
| ATOM 3717 HE3 LYS B 34    | -57.877 | -17.688 | 28.743 | 1.00  | 47.52 |      | H0 |
| ANISOU 3717 HE3 LYS B 34  | 6270    | 6000    | 5790   | -1320 | 630   | -270 | H0 |
| ATOM 3718 HZ1 LYS B 34    | -59.848 | -16.698 | 29.601 | 1.00  | 48.92 |      | H0 |
| ANISOU 3718 HZ1 LYS B 34  | 6120    | 6420    | 6050   | -1450 | 680   | -220 | H0 |
| ATOM 3719 HZ2 LYS B 34    | -59.989 | -18.122 | 29.241 | 1.00  | 50.47 |      | H0 |
| ANISOU 3719 HZ2 LYS B 34  | 6470    | 6450    | 6250   | -1620 | 710   | -250 | H0 |
| ATOM 3720 HZ3 LYS B 34    | -60.523 | -17.076 | 28.342 | 1.00  | 49.94 |      | H0 |
| ANISOU 3720 HZ3 LYS B 34  | 6190    | 6580    | 6210   | -1610 | 600   | -300 | H0 |
| ATOM 3721 N PHE B 35      | -55.061 | -13.209 | 30.472 | 1.00  | 34.37 |      | N0 |
| ANISOU 3721 N PHE B 35    | 4390    | 4640    | 4030   | -680  | 510   | -170 | N0 |
| ATOM 3722 CA PHE B 35     | -53.925 | -12.960 | 31.393 | 1.00  | 33.28 |      | C0 |
| ANISOU 3722 CA PHE B 35   | 4330    | 4480    | 3840   | -550  | 500   | -130 | C0 |
| ATOM 3723 C PHE B 35      | -53.064 | -14.221 | 31.457 | 1.00  | 32.74 |      | C0 |

|                          |         |         |        |      |       |      |    |
|--------------------------|---------|---------|--------|------|-------|------|----|
| ANISOU 3723 C PHE B 35   | 4410    | 4290    | 3740   | -520 | 530   | -110 | C0 |
| ATOM 3724 O PHE B 35     | -53.593 | -15.313 | 31.755 | 1.00 | 33.80 |      | O0 |
| ANISOU 3724 O PHE B 35   | 4640    | 4330    | 3870   | -590 | 600   | -90  | O0 |
| ATOM 3725 CB PHE B 35    | -54.429 | -12.464 | 32.750 | 1.00 | 33.92 |      | C0 |
| ANISOU 3725 CB PHE B 35  | 4400    | 4600    | 3890   | -520 | 560   | -90  | C0 |
| ATOM 3726 CG PHE B 35    | -54.988 | -11.068 | 32.682 | 1.00 | 33.64 |      | C0 |
| ANISOU 3726 CG PHE B 35  | 4240    | 4670    | 3870   | -500 | 530   | -110 | C0 |
| ATOM 3727 CD1 PHE B 35   | -54.141 | -9.971  | 32.642 | 1.00 | 32.84 |      | C0 |
| ANISOU 3727 CD1 PHE B 35 | 4120    | 4600    | 3750   | -410 | 450   | -120 | C0 |
| ATOM 3728 CD2 PHE B 35   | -56.355 | -10.852 | 32.630 | 1.00 | 34.54 |      | C0 |
| ANISOU 3728 CD2 PHE B 35 | 4250    | 4850    | 4020   | -570 | 570   | -110 | C0 |
| ATOM 3729 CE1 PHE B 35   | -54.648 | -8.685  | 32.555 | 1.00 | 32.50 |      | C0 |
| ANISOU 3729 CE1 PHE B 35 | 4000    | 4630    | 3710   | -380 | 420   | -140 | C0 |
| ATOM 3730 CE2 PHE B 35   | -56.861 | -9.563  | 32.546 | 1.00 | 35.01 |      | C0 |
| ANISOU 3730 CE2 PHE B 35 | 4200    | 5010    | 4090   | -520 | 550   | -130 | C0 |
| ATOM 3731 CZ PHE B 35    | -56.006 | -8.483  | 32.508 | 1.00 | 33.76 |      | C0 |
| ANISOU 3731 CZ PHE B 35  | 4070    | 4850    | 3900   | -420 | 470   | -150 | C0 |
| ATOM 3732 H PHE B 35     | -55.835 | -13.414 | 30.906 | 1.00 | 35.21 |      | H0 |
| ANISOU 3732 H PHE B 35   | 4480    | 4760    | 4150   | -740 | 560   | -150 | H0 |
| ATOM 3733 HA PHE B 35    | -53.372 | -12.239 | 30.999 | 1.00 | 32.55 |      | H0 |
| ANISOU 3733 HA PHE B 35  | 4190    | 4430    | 3740   | -500 | 450   | -140 | H0 |
| ATOM 3734 HB2 PHE B 35   | -55.123 | -13.076 | 33.073 | 1.00 | 34.66 |      | H0 |
| ANISOU 3734 HB2 PHE B 35 | 4520    | 4660    | 3990   | -590 | 630   | -70  | H0 |
| ATOM 3735 HB3 PHE B 35   | -53.685 | -12.483 | 33.388 | 1.00 | 33.79 |      | H0 |
| ANISOU 3735 HB3 PHE B 35 | 4450    | 4560    | 3830   | -450 | 550   | -60  | H0 |
| ATOM 3736 HD1 PHE B 35   | -53.207 | -10.104 | 32.668 | 1.00 | 32.57 |      | H0 |
| ANISOU 3736 HD1 PHE B 35 | 4140    | 4540    | 3690   | -370 | 410   | -120 | H0 |
| ATOM 3737 HD2 PHE B 35   | -56.945 | -11.587 | 32.651 | 1.00 | 35.38 |      | H0 |
| ANISOU 3737 HD2 PHE B 35 | 4350    | 4940    | 4150   | -650 | 620   | -100 | H0 |
| ATOM 3738 HE1 PHE B 35   | -54.060 | -7.947  | 32.534 | 1.00 | 32.26 |      | H0 |
| ANISOU 3738 HE1 PHE B 35 | 3980    | 4610    | 3670   | -330 | 370   | -150 | H0 |
| ATOM 3739 HE2 PHE B 35   | -57.795 | -9.427  | 32.517 | 1.00 | 35.25 |      | H0 |
| ANISOU 3739 HE2 PHE B 35 | 4150    | 5100    | 4140   | -550 | 580   | -130 | H0 |
| ATOM 3740 HZ PHE B 35    | -56.353 | -7.606  | 32.459 | 1.00 | 33.60 |      | H0 |
| ANISOU 3740 HZ PHE B 35  | 4000    | 4880    | 3890   | -380 | 460   | -160 | H0 |
| ATOM 3741 N ILE B 36     | -51.777 | -14.060 | 31.149 | 1.00 | 31.28 |      | N0 |
| ANISOU 3741 N ILE B 36   | 4250    | 4110    | 3530   | -410 | 470   | -110 | N0 |
| ATOM 3742 CA ILE B 36    | -50.758 | -15.147 | 31.180 | 1.00 | 32.16 |      | C0 |
| ANISOU 3742 CA ILE B 36  | 4490    | 4130    | 3600   | -320 | 490   | -80  | C0 |
| ATOM 3743 C ILE B 36     | -49.980 | -15.054 | 32.497 | 1.00 | 32.68 |      | C0 |
| ANISOU 3743 C ILE B 36   | 4610    | 4200    | 3610   | -200 | 490   | -20  | C0 |
| ATOM 3744 O ILE B 36     | -49.622 | -16.113 | 33.038 | 1.00 | 33.80 |      | O0 |
| ANISOU 3744 O ILE B 36   | 4890    | 4250    | 3700   | -140 | 530   | 20   | O0 |
| ATOM 3745 CB ILE B 36    | -49.823 | -15.077 | 29.953 | 1.00 | 31.08 |      | C0 |
| ANISOU 3745 CB ILE B 36  | 4330    | 4010    | 3470   | -260 | 440   | -120 | C0 |
| ATOM 3746 CG1 ILE B 36   | -50.589 | -14.811 | 28.653 | 1.00 | 30.47 |      | C0 |
| ANISOU 3746 CG1 ILE B 36 | 4180    | 3960    | 3430   | -370 | 420   | -180 | C0 |
| ATOM 3747 CG2 ILE B 36   | -48.988 | -16.340 | 29.860 | 1.00 | 32.18 |      | C0 |
| ANISOU 3747 CG2 ILE B 36 | 4620    | 4050    | 3570   | -160 | 480   | -100 | C0 |
| ATOM 3748 CD1 ILE B 36   | -51.705 | -15.790 | 28.374 | 1.00 | 31.08 |      | C0 |
| ANISOU 3748 CD1 ILE B 36 | 4340    | 3950    | 3520   | -500 | 470   | -210 | C0 |
| ATOM 3749 H ILE B 36     | -51.434 | -13.256 | 30.891 | 1.00 | 30.94 |      | H0 |
| ANISOU 3749 H ILE B 36   | 4130    | 4130    | 3490   | -370 | 420   | -120 | H0 |
| ATOM 3750 HA ILE B 36    | -51.222 | -16.002 | 31.160 | 1.00 | 32.77 |      | H0 |



|                           |         |         |        |      |       |      |    |
|---------------------------|---------|---------|--------|------|-------|------|----|
| ANISOU 3750 HA ILE B 36   | 4660    | 4120    | 3680   | -380 | 540   | -80  | H0 |
| ATOM 3751 HB ILE B 36     | -49.205 | -14.318 | 30.094 | 1.00 | 30.64 |      | H0 |
| ANISOU 3751 HB ILE B 36   | 4200    | 4040    | 3410   | -200 | 400   | -110 | H0 |
| ATOM 3752 HG12 ILE B 36   | -50.966 | -13.906 | 28.688 | 1.00 | 29.91 |      | H0 |
| ANISOU 3752 HG12 ILE B 36 | 4010    | 3970    | 3380   | -400 | 390   | -190 | H0 |
| ATOM 3753 HG13 ILE B 36   | -49.954 | -14.840 | 27.906 | 1.00 | 30.39 |      | H0 |
| ANISOU 3753 HG13 ILE B 36 | 4170    | 3960    | 3410   | -320 | 400   | -200 | H0 |
| ATOM 3754 HG21 ILE B 36   | -48.353 | -16.368 | 30.596 | 1.00 | 32.29 |      | H0 |
| ANISOU 3754 HG21 ILE B 36 | 4650    | 4070    | 3550   | -70  | 480   | -50  | H0 |
| ATOM 3755 HG22 ILE B 36   | -48.504 | -16.349 | 29.016 | 1.00 | 32.05 |      | H0 |
| ANISOU 3755 HG22 ILE B 36 | 4580    | 4040    | 3550   | -130 | 460   | -120 | H0 |
| ATOM 3756 HG23 ILE B 36   | -49.569 | -17.120 | 29.905 | 1.00 | 32.83 |      | H0 |
| ANISOU 3756 HG23 ILE B 36 | 4800    | 4030    | 3650   | -220 | 530   | -100 | H0 |
| ATOM 3757 HD11 ILE B 36   | -51.331 | -16.673 | 28.206 | 1.00 | 31.84 |      | H0 |
| ANISOU 3757 HD11 ILE B 36 | 4550    | 3950    | 3600   | -480 | 490   | -210 | H0 |
| ATOM 3758 HD12 ILE B 36   | -52.206 | -15.498 | 27.593 | 1.00 | 31.07 |      | H0 |
| ANISOU 3758 HD12 ILE B 36 | 4280    | 3980    | 3540   | -570 | 440   | -250 | H0 |
| ATOM 3759 HD13 ILE B 36   | -52.304 | -15.834 | 29.139 | 1.00 | 31.45 |      | H0 |
| ANISOU 3759 HD13 ILE B 36 | 4390    | 3980    | 3580   | -550 | 500   | -190 | H0 |
| ATOM 3760 N ASN B 37      | -49.705 | -13.845 | 32.989 | 1.00 | 32.48 |      | N0 |
| ANISOU 3760 N ASN B 37    | 4490    | 4280    | 3570   | -170 | 430   | -20  | N0 |
| ATOM 3761 CA ASN B 37     | -48.825 | -13.685 | 34.172 | 1.00 | 33.42 |      | C0 |
| ANISOU 3761 CA ASN B 37   | 4640    | 4430    | 3620   | -50  | 390   | 30   | C0 |
| ATOM 3762 C ASN B 37      | -49.027 | -12.327 | 34.844 | 1.00 | 33.36 |      | C0 |
| ANISOU 3762 C ASN B 37    | 4560    | 4510    | 3600   | -60  | 340   | 10   | C0 |
| ATOM 3763 O ASN B 37      | -49.435 | -11.369 | 34.163 | 1.00 | 32.58 |      | O0 |
| ANISOU 3763 O ASN B 37    | 4360    | 4460    | 3550   | -130 | 320   | -30  | O0 |
| ATOM 3764 CB ASN B 37     | -47.359 | -13.872 | 33.785 | 1.00 | 33.50 |      | C0 |
| ANISOU 3764 CB ASN B 37   | 4630    | 4480    | 3620   | 60   | 330   | 40   | C0 |
| ATOM 3765 CG ASN B 37     | -46.588 | -14.654 | 34.819 | 1.00 | 34.82 |      | C0 |
| ANISOU 3765 CG ASN B 37   | 4910    | 4610    | 3710   | 190  | 330   | 110  | C0 |
| ATOM 3766 OD1 ASN B 37    | -46.854 | -14.532 | 36.017 | 1.00 | 34.98 |      | O0 |
| ANISOU 3766 OD1 ASN B 37  | 4990    | 4630    | 3670   | 210  | 330   | 140  | O0 |
| ATOM 3767 ND2 ASN B 37    | -45.657 | -15.477 | 34.359 | 1.00 | 34.98 |      | N0 |
| ANISOU 3767 ND2 ASN B 37  | 4960    | 4610    | 3720   | 300  | 330   | 130  | N0 |
| ATOM 3768 H ASN B 37      | -50.022 | -13.068 | 32.637 | 1.00 | 31.95 |      | H0 |
| ANISOU 3768 H ASN B 37    | 4330    | 4270    | 3530   | -210 | 400   | -50  | H0 |
| ATOM 3769 HA ASN B 37     | -49.056 | -14.390 | 34.821 | 1.00 | 34.06 |      | H0 |
| ANISOU 3769 HA ASN B 37   | 4830    | 4450    | 3670   | -40  | 450   | 60   | H0 |
| ATOM 3770 HB2 ASN B 37    | -47.311 | -14.341 | 32.928 | 1.00 | 33.59 |      | H0 |
| ANISOU 3770 HB2 ASN B 37  | 4650    | 4450    | 3660   | 50   | 350   | 20   | H0 |
| ATOM 3771 HB3 ASN B 37    | -46.943 | -12.992 | 33.674 | 1.00 | 33.11 |      | H0 |
| ANISOU 3771 HB3 ASN B 37  | 4490    | 4510    | 3580   | 60   | 270   | 30   | H0 |
| ATOM 3772 HD21 ASN B 37   | -45.486 | -16.232 | 34.786 | 1.00 | 35.90 |      | H0 |
| ANISOU 3772 HD21 ASN B 37 | 5180    | 4670    | 3790   | 370  | 360   | 170  | H0 |
| ATOM 3773 HD22 ASN B 37   | -45.209 | -15.273 | 33.625 | 1.00 | 34.85 |      | H0 |
| ANISOU 3773 HD22 ASN B 37 | 4870    | 4640    | 3730   | 310  | 310   | 110  | H0 |
| ATOM 3774 N ILE B 38      | -48.748 | -12.291 | 36.147 | 1.00 | 34.48 |      | N0 |
| ANISOU 3774 N ILE B 38    | 4780    | 4660    | 3660   | 0    | 330   | 50   | N0 |
| ATOM 3775 CA ILE B 38     | -48.594 | -11.070 | 36.989 | 1.00 | 35.45 |      | C0 |
| ANISOU 3775 CA ILE B 38   | 4880    | 4850    | 3740   | 20   | 270   | 30   | C0 |
| ATOM 3776 C ILE B 38      | -47.226 | -11.190 | 37.668 | 1.00 | 36.85 |      | C0 |
| ANISOU 3776 C ILE B 38    | 5080    | 5070    | 3840   | 130  | 180   | 60   | C0 |
| ATOM 3777 O ILE B 38      | -47.031 | -12.163 | 38.417 | 1.00 | 37.21 |      | O0 |

|                           |         |         |        |      |       |     |    |
|---------------------------|---------|---------|--------|------|-------|-----|----|
| ANISOU 3777 O ILE B 38    | 5240    | 5070    | 3820   | 210  | 210   | 120 | O0 |
| ATOM 3778 CB ILE B 38     | -49.756 | -10.960 | 37.997 | 1.00 | 36.32 |     | C0 |
| ANISOU 3778 CB ILE B 38   | 5060    | 4940    | 3800   | 0    | 350   | 40  | C0 |
| ATOM 3779 CG1 ILE B 38    | -51.114 | -10.899 | 37.289 | 1.00 | 36.00 |     | C0 |
| ANISOU 3779 CG1 ILE B 38  | 4950    | 4890    | 3840   | -100 | 440   | 20  | C0 |
| ATOM 3780 CG2 ILE B 38    | -49.547 | -9.778  | 38.936 | 1.00 | 36.60 |     | C0 |
| ANISOU 3780 CG2 ILE B 38  | 5120    | 5030    | 3760   | 40   | 290   | 20  | C0 |
| ATOM 3781 CD1 ILE B 38    | -52.297 | -11.201 | 38.184 | 1.00 | 37.03 |     | C0 |
| ANISOU 3781 CD1 ILE B 38  | 5140    | 5000    | 3930   | -120 | 560   | 50  | C0 |
| ATOM 3782 H ILE B 38      | -48.633 | -13.056 | 36.629 | 1.00 | 35.25 |     | H0 |
| ANISOU 3782 H ILE B 38    | 4960    | 4710    | 3720   | 50   | 370   | 90  | H0 |
| ATOM 3783 HA ILE B 38     | -48.598 | -10.284 | 36.414 | 1.00 | 34.88 |     | H0 |
| ANISOU 3783 HA ILE B 38   | 4720    | 4820    | 3710   | -20  | 230   | 0   | H0 |
| ATOM 3784 HB ILE B 38     | -49.748 | -11.782 | 38.547 | 1.00 | 36.95 |     | H0 |
| ANISOU 3784 HB ILE B 38   | 5230    | 4980    | 3830   | 40   | 400   | 90  | H0 |
| ATOM 3785 HG12 ILE B 38   | -51.229 | -10.002 | 36.910 | 1.00 | 35.52 |     | H0 |
| ANISOU 3785 HG12 ILE B 38 | 4820    | 4870    | 3810   | -120 | 400   | -20 | H0 |
| ATOM 3786 HG13 ILE B 38   | -51.113 | -11.539 | 36.547 | 1.00 | 35.91 |     | H0 |
| ANISOU 3786 HG13 ILE B 38 | 4930    | 4850    | 3870   | -130 | 460   | 20  | H0 |
| ATOM 3787 HG21 ILE B 38   | -48.836 | -9.984  | 39.568 | 1.00 | 37.09 |     | H0 |
| ANISOU 3787 HG21 ILE B 38 | 5230    | 5100    | 3760   | 110  | 240   | 40  | H0 |
| ATOM 3788 HG22 ILE B 38   | -50.368 | -9.599  | 39.425 | 1.00 | 36.84 |     | H0 |
| ANISOU 3788 HG22 ILE B 38 | 5180    | 5050    | 3770   | 30   | 350   | 20  | H0 |
| ATOM 3789 HG23 ILE B 38   | -49.301 | -8.991  | 38.420 | 1.00 | 36.04 |     | H0 |
| ANISOU 3789 HG23 ILE B 38 | 4970    | 4990    | 3730   | 20   | 230   | -20 | H0 |
| ATOM 3790 HD11 ILE B 38   | -52.134 | -12.027 | 38.671 | 1.00 | 37.60 |     | H0 |
| ANISOU 3790 HD11 ILE B 38 | 5310    | 5020    | 3960   | -100 | 600   | 100 | H0 |
| ATOM 3791 HD12 ILE B 38   | -53.099 | -11.299 | 37.642 | 1.00 | 36.91 |     | H0 |
| ANISOU 3791 HD12 ILE B 38 | 5060    | 4990    | 3970   | -200 | 610   | 40  | H0 |
| ATOM 3792 HD13 ILE B 38   | -52.423 | -10.473 | 38.816 | 1.00 | 37.08 |     | H0 |
| ANISOU 3792 HD13 ILE B 38 | 5160    | 5040    | 3890   | -90  | 550   | 40  | H0 |
| ATOM 3793 N LEU B 39      | -46.305 | -10.268 | 37.382 | 1.00 | 39.57 |     | N0 |
| ANISOU 3793 N LEU B 39    | 5330    | 5500    | 4210   | 130  | 60    | 30  | N0 |
| ATOM 3794 CA LEU B 39     | -44.842 | -10.466 | 37.599 | 1.00 | 43.03 |     | C0 |
| ANISOU 3794 CA LEU B 39   | 5730    | 6010    | 4610   | 210  | -40   | 60  | C0 |
| ATOM 3795 C LEU B 39      | -44.335 | -9.612  | 38.759 | 1.00 | 45.33 |     | C0 |
| ANISOU 3795 C LEU B 39    | 6030    | 6370    | 4820   | 230  | -150  | 50  | C0 |
| ATOM 3796 O LEU B 39      | -43.520 | -10.123 | 39.554 | 1.00 | 48.54 |     | O0 |
| ANISOU 3796 O LEU B 39    | 6480    | 6820    | 5140   | 330  | -210  | 90  | O0 |
| ATOM 3797 CB LEU B 39     | -44.101 | -10.100 | 36.311 | 1.00 | 42.85 |     | C0 |
| ANISOU 3797 CB LEU B 39   | 5550    | 6050    | 4680   | 180  | -80   | 40  | C0 |
| ATOM 3798 CG LEU B 39     | -44.434 | -10.981 | 35.111 | 1.00 | 43.82 |     | C0 |
| ANISOU 3798 CG LEU B 39   | 5670    | 6110    | 4860   | 180  | 20    | 50  | C0 |
| ATOM 3799 CD1 LEU B 39    | -43.713 | -10.491 | 33.871 | 1.00 | 44.05 |     | C0 |
| ANISOU 3799 CD1 LEU B 39  | 5560    | 6210    | 4960   | 150  | -10   | 30  | C0 |
| ATOM 3800 CD2 LEU B 39    | -44.076 | -12.434 | 35.397 | 1.00 | 45.24 |     | C0 |
| ANISOU 3800 CD2 LEU B 39  | 5950    | 6240    | 5000   | 300  | 70    | 100 | C0 |
| ATOM 3801 H LEU B 39      | -46.518 | -9.458  | 37.024 | 1.00 | 38.97 |     | H0 |
| ANISOU 3801 H LEU B 39    | 5200    | 5450    | 4170   | 70   | 40    | 0   | H0 |
| ATOM 3802 HA LEU B 39     | -44.682 | -11.413 | 37.814 | 1.00 | 43.37 |     | H0 |
| ANISOU 3802 HA LEU B 39   | 5830    | 6020    | 4620   | 290  | 0     | 100 | H0 |
| ATOM 3803 HB2 LEU B 39    | -44.312 | -9.172  | 36.086 | 1.00 | 42.64 |     | H0 |
| ANISOU 3803 HB2 LEU B 39  | 5480    | 6040    | 4680   | 100  | -100  | 10  | H0 |
| ATOM 3804 HB3 LEU B 39    | -43.139 | -10.153 | 36.481 | 1.00 | 43.71 |     | H0 |

|                           |         |         |        |      |       |      |    |
|---------------------------|---------|---------|--------|------|-------|------|----|
| ANISOU 3804 HB3 LEU B 39  | 5610    | 6230    | 4770   | 230  | -140  | 70   | H0 |
| ATOM 3805 HG LEU B 39     | -45.407 | -10.927 | 34.946 | 1.00 | 43.26 |      | H0 |
| ANISOU 3805 HG LEU B 39   | 5640    | 5990    | 4810   | 120  | 80    | 30   | H0 |
| ATOM 3806 HD11 LEU B 39   | -43.966 | -9.569  | 33.690 | 1.00 | 43.37 |      | H0 |
| ANISOU 3806 HD11 LEU B 39 | 5430    | 6150    | 4900   | 70   | -40   | 0    | H0 |
| ATOM 3807 HD12 LEU B 39   | -43.955 | -11.049 | 33.112 | 1.00 | 43.62 |      | H0 |
| ANISOU 3807 HD12 LEU B 39 | 5520    | 6120    | 4940   | 150  | 50    | 30   | H0 |
| ATOM 3808 HD13 LEU B 39   | -42.753 | -10.543 | 34.015 | 1.00 | 44.43 |      | H0 |
| ANISOU 3808 HD13 LEU B 39 | 5550    | 6330    | 5000   | 210  | -60   | 60   | H0 |
| ATOM 3809 HD21 LEU B 39   | -43.188 | -12.478 | 35.794 | 1.00 | 45.72 |      | H0 |
| ANISOU 3809 HD21 LEU B 39 | 5980    | 6370    | 5020   | 380  | 10    | 130  | H0 |
| ATOM 3810 HD22 LEU B 39   | -44.084 | -12.940 | 34.566 | 1.00 | 44.93 |      | H0 |
| ANISOU 3810 HD22 LEU B 39 | 5910    | 6170    | 5000   | 310  | 110   | 100  | H0 |
| ATOM 3811 HD23 LEU B 39   | -44.725 | -12.815 | 36.013 | 1.00 | 45.24 |      | H0 |
| ANISOU 3811 HD23 LEU B 39 | 6050    | 6180    | 4960   | 300  | 110   | 120  | H0 |
| ATOM 3812 N GLU B 40      | -44.726 | -8.341  | 38.782 | 1.00 | 46.41 |      | N0 |
| ANISOU 3812 N GLU B 40    | 6150    | 6520    | 4970   | 140  | -180  | -10  | N0 |
| ATOM 3813 CA GLU B 40     | -44.275 | -7.343  | 39.781 | 1.00 | 49.27 |      | C0 |
| ANISOU 3813 CA GLU B 40   | 6550    | 6930    | 5250   | 130  | -300  | -50  | C0 |
| ATOM 3814 C GLU B 40      | -45.499 | -6.521  | 40.170 | 1.00 | 48.51 |      | C0 |
| ANISOU 3814 C GLU B 40    | 6550    | 6760    | 5120   | 80   | -240  | -90  | C0 |
| ATOM 3815 O GLU B 40      | -46.215 | -6.026  | 39.264 | 1.00 | 49.70 |      | O0 |
| ANISOU 3815 O GLU B 40    | 6650    | 6880    | 5360   | 20   | -180  | -120 | O0 |
| ATOM 3816 CB GLU B 40     | -43.159 | -6.454  | 39.231 | 1.00 | 52.30 |      | C0 |
| ANISOU 3816 CB GLU B 40   | 6790    | 7390    | 5680   | 50   | -430  | -70  | C0 |
| ATOM 3817 CG GLU B 40     | -41.923 | -7.223  | 38.802 | 1.00 | 55.20 |      | C0 |
| ANISOU 3817 CG GLU B 40   | 7030    | 7860    | 6080   | 110  | -480  | -20  | C0 |
| ATOM 3818 CD GLU B 40     | -40.615 | -6.509  | 39.095 | 1.00 | 59.43 |      | C0 |
| ANISOU 3818 CD GLU B 40   | 7460    | 8520    | 6600   | 70   | -640  | -30  | C0 |
| ATOM 3819 OE1 GLU B 40    | -40.455 | -5.354  | 38.628 | 1.00 | 61.50 |      | O0 |
| ANISOU 3819 OE1 GLU B 40  | 7660    | 8790    | 6920   | -60  | -690  | -80  | O0 |
| ATOM 3820 OE2 GLU B 40    | -39.770 | -7.099  | 39.810 | 1.00 | 61.22 |      | O0 |
| ANISOU 3820 OE2 GLU B 40  | 7660    | 8840    | 6760   | 170  | -720  | 10   | O0 |
| ATOM 3821 H GLU B 40      | -45.302 | -7.998  | 38.167 | 1.00 | 45.78 |      | H0 |
| ANISOU 3821 H GLU B 40    | 6040    | 6410    | 4940   | 80   | -140  | -30  | H0 |
| ATOM 3822 HA GLU B 40     | -43.942 | -7.820  | 40.575 | 1.00 | 50.10 |      | H0 |
| ANISOU 3822 HA GLU B 40   | 6710    | 7050    | 5270   | 200  | -330  | -20  | H0 |
| ATOM 3823 HB2 GLU B 40    | -43.507 | -5.958  | 38.462 | 1.00 | 51.38 |      | H0 |
| ANISOU 3823 HB2 GLU B 40  | 6630    | 7250    | 5640   | -10  | -390  | -100 | H0 |
| ATOM 3824 HB3 GLU B 40    | -42.909 | -5.804  | 39.921 | 1.00 | 52.81 |      | H0 |
| ANISOU 3824 HB3 GLU B 40  | 6900    | 7480    | 5690   | 30   | -510  | -100 | H0 |
| ATOM 3825 HG2 GLU B 40    | -41.912 | -8.090  | 39.260 | 1.00 | 55.70 |      | H0 |
| ANISOU 3825 HG2 GLU B 40  | 7150    | 7910    | 6090   | 210  | -450  | 20   | H0 |
| ATOM 3826 HG3 GLU B 40    | -41.974 | -7.397  | 37.838 | 1.00 | 54.67 |      | H0 |
| ANISOU 3826 HG3 GLU B 40  | 6900    | 7780    | 6090   | 90   | -420  | -10  | H0 |
| ATOM 3827 N VAL B 41      | -45.758 | -6.473  | 41.468 | 1.00 | 45.80 |      | N0 |
| ANISOU 3827 N VAL B 41    | 6340    | 6400    | 4660   | 140  | -250  | -100 | N0 |
| ATOM 3828 CA VAL B 41     | -46.913 | -5.776  | 42.089 | 1.00 | 44.41 |      | C0 |
| ANISOU 3828 CA VAL B 41   | 6280    | 6170    | 4420   | 140  | -170  | -140 | C0 |
| ATOM 3829 C VAL B 41      | -46.327 | -4.890  | 43.183 | 1.00 | 43.27 |      | C0 |
| ANISOU 3829 C VAL B 41    | 6240    | 6050    | 4150   | 150  | -300  | -190 | C0 |
| ATOM 3830 O VAL B 41      | -45.444 | -5.369  | 43.904 | 1.00 | 42.56 |      | O0 |
| ANISOU 3830 O VAL B 41    | 6180    | 6010    | 3970   | 200  | -400  | -160 | O0 |
| ATOM 3831 CB VAL B 41     | -47.920 | -6.807  | 42.630 | 1.00 | 45.12 |      | C0 |

|                           |         |        |        |      |       |      |    |
|---------------------------|---------|--------|--------|------|-------|------|----|
| ANISOU 3831 CB VAL B 41   | 6460    | 6220   | 4470   | 200  | -20   | -80  | C0 |
| ATOM 3832 CG1 VAL B 41    | -48.839 | -6.223 | 43.687 | 1.00 | 45.48 |      | C0 |
| ANISOU 3832 CG1 VAL B 41  | 6640    | 6240   | 4400   | 240  | 50    | -100 | C0 |
| ATOM 3833 CG2 VAL B 41    | -48.716 | -7.441 | 41.502 | 1.00 | 43.98 |      | C0 |
| ANISOU 3833 CG2 VAL B 41  | 6220    | 6040   | 4450   | 150  | 100   | -50  | C0 |
| ATOM 3834 H VAL B 41      | -45.224 | -6.883 | 42.082 | 1.00 | 46.99 |      | H0 |
| ANISOU 3834 H VAL B 41    | 6530    | 6590   | 4740   | 190  | -290  | -70  | H0 |
| ATOM 3835 HA VAL B 41     | -47.349 | -5.219 | 41.420 | 1.00 | 43.68 |      | H0 |
| ANISOU 3835 HA VAL B 41   | 6140    | 6060   | 4400   | 90   | -150  | -160 | H0 |
| ATOM 3836 HB VAL B 41     | -47.395 | -7.524 | 43.061 | 1.00 | 45.43 |      | H0 |
| ANISOU 3836 HB VAL B 41   | 6540    | 6270   | 4450   | 250  | -40   | -40  | H0 |
| ATOM 3837 HG11 VAL B 41   | -48.382 | -6.212 | 44.547 | 1.00 | 46.45 |      | H0 |
| ANISOU 3837 HG11 VAL B 41 | 6860    | 6380   | 4420   | 290  | -10   | -100 | H0 |
| ATOM 3838 HG12 VAL B 41   | -49.642 | -6.766 | 43.755 | 1.00 | 45.56 |      | H0 |
| ANISOU 3838 HG12 VAL B 41 | 6670    | 6230   | 4420   | 250  | 170   | -70  | H0 |
| ATOM 3839 HG13 VAL B 41   | -49.080 | -5.318 | 43.436 | 1.00 | 45.28 |      | H0 |
| ANISOU 3839 HG13 VAL B 41 | 6600    | 6210   | 4400   | 210  | 30    | -150 | H0 |
| ATOM 3840 HG21 VAL B 41   | -49.398 | -6.819 | 41.194 | 1.00 | 43.65 |      | H0 |
| ANISOU 3840 HG21 VAL B 41 | 6150    | 5990   | 4440   | 120  | 140   | -80  | H0 |
| ATOM 3841 HG22 VAL B 41   | -49.142 | -8.255 | 41.822 | 1.00 | 44.32 |      | H0 |
| ANISOU 3841 HG22 VAL B 41 | 6310    | 6060   | 4470   | 180  | 190   | -10  | H0 |
| ATOM 3842 HG23 VAL B 41   | -48.120 | -7.658 | 40.764 | 1.00 | 43.57 |      | H0 |
| ANISOU 3842 HG23 VAL B 41 | 6080    | 6010   | 4460   | 130  | 60    | -50  | H0 |
| ATOM 3843 N ASN B 42      | -46.760 | -3.636 | 43.243 | 1.00 | 42.01 |      | N0 |
| ANISOU 3843 N ASN B 42    | 6130    | 5850   | 3980   | 110  | -320  | -260 | N0 |
| ATOM 3844 CA ASN B 42     | -46.314 | -2.665 | 44.271 | 1.00 | 42.88 |      | C0 |
| ANISOU 3844 CA ASN B 42   | 6380    | 5950   | 3960   | 100  | -440  | -330 | C0 |
| ATOM 3845 C ASN B 42      | -47.554 | -1.930 | 44.789 | 1.00 | 42.42 |      | C0 |
| ANISOU 3845 C ASN B 42    | 6470    | 5810   | 3830   | 150  | -330  | -380 | C0 |
| ATOM 3846 O ASN B 42      | -48.094 | -1.068 | 44.056 | 1.00 | 41.15 |      | O0 |
| ANISOU 3846 O ASN B 42    | 6280    | 5600   | 3750   | 110  | -290  | -410 | O0 |
| ATOM 3847 CB ASN B 42     | -45.216 | -1.750 | 43.723 | 1.00 | 42.78 |      | C0 |
| ANISOU 3847 CB ASN B 42   | 6280    | 5960   | 4010   | -20  | -600  | -380 | C0 |
| ATOM 3848 CG ASN B 42     | -44.506 | -0.973 | 44.810 | 1.00 | 44.04 |      | C0 |
| ANISOU 3848 CG ASN B 42   | 6570    | 6130   | 4030   | -50  | -770  | -450 | C0 |
| ATOM 3849 OD1 ASN B 42    | -45.085 | -0.688 | 45.853 | 1.00 | 44.64 |      | O0 |
| ANISOU 3849 OD1 ASN B 42  | 6840    | 6160   | 3960   | 20   | -740  | -490 | O0 |
| ATOM 3850 ND2 ASN B 42    | -43.257 | -0.613 | 44.569 | 1.00 | 44.56 |      | N0 |
| ANISOU 3850 ND2 ASN B 42  | 6540    | 6260   | 4130   | -160 | -930  | -470 | N0 |
| ATOM 3851 H ASN B 42      | -47.360 | -3.293 | 42.648 | 1.00 | 41.58 |      | H0 |
| ANISOU 3851 H ASN B 42    | 6040    | 5760   | 3990   | 80   | -260  | -270 | H0 |
| ATOM 3852 HA ASN B 42     | -45.922 | -3.173 | 45.020 | 1.00 | 43.52 |      | H0 |
| ANISOU 3852 HA ASN B 42   | 6520    | 6070   | 3950   | 150  | -480  | -310 | H0 |
| ATOM 3853 HB2 ASN B 42    | -44.562 | -2.295 | 43.240 | 1.00 | 42.44 |      | H0 |
| ANISOU 3853 HB2 ASN B 42  | 6120    | 5980   | 4030   | -40  | -640  | -340 | H0 |
| ATOM 3854 HB3 ASN B 42    | -45.615 | -1.124 | 43.087 | 1.00 | 42.18 |      | H0 |
| ANISOU 3854 HB3 ASN B 42  | 6190    | 5840   | 4000   | -70  | -570  | -410 | H0 |
| ATOM 3855 HD21 ASN B 42   | -42.729 | -0.374 | 45.237 | 1.00 | 45.75 |      | H0 |
| ANISOU 3855 HD21 ASN B 42 | 6740    | 6440   | 4200   | -180 | -1050 | -500 | H0 |
| ATOM 3856 HD22 ASN B 42   | -42.949 | -0.611 | 43.740 | 1.00 | 43.99 |      | H0 |
| ANISOU 3856 HD22 ASN B 42 | 6340    | 6210   | 4170   | -220 | -930  | -450 | H0 |
| ATOM 3857 N GLU B 43      | -47.992 | -2.292 | 45.997 | 1.00 | 42.60 |      | N0 |
| ANISOU 3857 N GLU B 43    | 6650    | 5830   | 3700   | 250  | -270  | -360 | N0 |
| ATOM 3858 CA GLU B 43     | -49.188 | -1.718 | 46.666 | 1.00 | 43.64 |      | C0 |

|                           |         |        |        |      |       |      |    |
|---------------------------|---------|--------|--------|------|-------|------|----|
| ANISOU 3858 CA GLU B 43   | 6930    | 5910   | 3740   | 330  | -150  | -400 | C0 |
| ATOM 3859 C GLU B 43      | -48.927 | -0.253 | 47.038 | 1.00 | 44.44 |      | C0 |
| ANISOU 3859 C GLU B 43    | 7170    | 5950   | 3760   | 310  | -260  | -510 | C0 |
| ATOM 3860 O GLU B 43      | -49.908 | 0.516  | 47.104 | 1.00 | 44.93 |      | O0 |
| ANISOU 3860 O GLU B 43    | 7320    | 5950   | 3800   | 360  | -150  | -550 | O0 |
| ATOM 3861 CB GLU B 43     | -49.550 | -2.536 | 47.910 | 1.00 | 44.87 |      | C0 |
| ANISOU 3861 CB GLU B 43   | 7220    | 6090   | 3740   | 440  | -60   | -350 | C0 |
| ATOM 3862 CG GLU B 43     | -50.903 | -2.164 | 48.484 | 1.00 | 45.74 |      | C0 |
| ANISOU 3862 CG GLU B 43   | 7450    | 6170   | 3770   | 540  | 120   | -360 | C0 |
| ATOM 3863 CD GLU B 43     | -51.496 | -3.146 | 49.482 | 1.00 | 47.02 |      | C0 |
| ANISOU 3863 CD GLU B 43   | 7710    | 6350   | 3800   | 640  | 270   | -280 | C0 |
| ATOM 3864 OE1 GLU B 43    | -52.571 | -2.830 | 50.036 | 1.00 | 47.65 |      | O0 |
| ANISOU 3864 OE1 GLU B 43  | 7880    | 6420   | 3800   | 720  | 430   | -280 | O0 |
| ATOM 3865 OE2 GLU B 43    | -50.897 | -4.228 | 49.693 | 1.00 | 47.07 |      | O0 |
| ANISOU 3865 OE2 GLU B 43  | 7710    | 6390   | 3790   | 640  | 240   | -200 | O0 |
| ATOM 3866 H GLU B 43      | -47.571 | -2.928 | 46.495 | 1.00 | 43.36 |      | H0 |
| ANISOU 3866 H GLU B 43    | 6770    | 5970   | 3740   | 290  | -310  | -330 | H0 |
| ATOM 3867 HA GLU B 43     | -49.941 | -1.753 | 46.034 | 1.00 | 42.77 |      | H0 |
| ANISOU 3867 HA GLU B 43   | 6740    | 5790   | 3720   | 330  | -40   | -380 | H0 |
| ATOM 3868 HB2 GLU B 43    | -49.551 | -3.486 | 47.672 | 1.00 | 44.41 |      | H0 |
| ANISOU 3868 HB2 GLU B 43  | 7090    | 6060   | 3730   | 440  | -10   | -280 | H0 |
| ATOM 3869 HB3 GLU B 43    | -48.861 | -2.394 | 48.593 | 1.00 | 45.82 |      | H0 |
| ANISOU 3869 HB3 GLU B 43  | 7440    | 6220   | 3750   | 460  | -170  | -380 | H0 |
| ATOM 3870 HG2 GLU B 43    | -50.828 | -1.291 | 48.925 | 1.00 | 46.58 |      | H0 |
| ANISOU 3870 HG2 GLU B 43  | 7680    | 6240   | 3790   | 560  | 70    | -430 | H0 |
| ATOM 3871 HG3 GLU B 43    | -51.539 | -2.063 | 47.744 | 1.00 | 44.99 |      | H0 |
| ANISOU 3871 HG3 GLU B 43  | 7250    | 6060   | 3780   | 520  | 200   | -350 | H0 |
| ATOM 3872 N ILE B 44      | -47.667 | 0.117  | 47.295 | 1.00 | 44.79 |      | N0 |
| ANISOU 3872 N ILE B 44    | 7250    | 6010   | 3760   | 230  | -460  | -560 | N0 |
| ATOM 3873 CA ILE B 44     | -47.280 | 1.494  | 47.728 | 1.00 | 46.11 |      | C0 |
| ANISOU 3873 CA ILE B 44   | 7580    | 6100   | 3840   | 170  | -590  | -670 | C0 |
| ATOM 3874 C ILE B 44      | -47.369 | 2.441  | 46.521 | 1.00 | 44.08 |      | C0 |
| ANISOU 3874 C ILE B 44    | 7240    | 5770   | 3740   | 70   | -600  | -710 | C0 |
| ATOM 3875 O ILE B 44      | -47.945 | 3.530  | 46.675 | 1.00 | 44.98 |      | O0 |
| ANISOU 3875 O ILE B 44    | 7510    | 5770   | 3810   | 100  | -560  | -780 | O0 |
| ATOM 3876 CB ILE B 44     | -45.890 | 1.502  | 48.399 | 1.00 | 48.32 |      | C0 |
| ANISOU 3876 CB ILE B 44   | 7890    | 6440   | 4030   | 100  | -820  | -710 | C0 |
| ATOM 3877 CG1 ILE B 44    | -45.886 | 0.691  | 49.702 | 1.00 | 50.17 |      | C0 |
| ANISOU 3877 CG1 ILE B 44  | 8250    | 6740   | 4070   | 230  | -820  | -680 | C0 |
| ATOM 3878 CG2 ILE B 44    | -45.410 | 2.927  | 48.633 | 1.00 | 50.05 |      | C0 |
| ANISOU 3878 CG2 ILE B 44  | 8260    | 6570   | 4190   | -10  | -970  | -830 | C0 |
| ATOM 3879 CD1 ILE B 44    | -44.519 | 0.171  | 50.108 | 1.00 | 51.31 |      | C0 |
| ANISOU 3879 CD1 ILE B 44  | 8330    | 7000   | 4160   | 190  | -1020 | -660 | C0 |
| ATOM 3880 H ILE B 44      | -46.962 | -0.455 | 47.229 | 1.00 | 44.78 |      | H0 |
| ANISOU 3880 H ILE B 44    | 7160    | 6070   | 3780   | 200  | -530  | -520 | H0 |
| ATOM 3881 HA ILE B 44     | -47.930 | 1.791  | 48.390 | 1.00 | 46.80 |      | H0 |
| ANISOU 3881 HA ILE B 44   | 7820    | 6140   | 3820   | 260  | -520  | -700 | H0 |
| ATOM 3882 HB ILE B 44     | -45.255 | 1.069  | 47.777 | 1.00 | 47.65 |      | H0 |
| ANISOU 3882 HB ILE B 44   | 7630    | 6420   | 4050   | 40   | -870  | -670 | H0 |
| ATOM 3883 HG12 ILE B 44   | -46.233 | 1.257  | 50.424 | 1.00 | 51.15 |      | H0 |
| ANISOU 3883 HG12 ILE B 44 | 8560    | 6810   | 4070   | 270  | -810  | -740 | H0 |
| ATOM 3884 HG13 ILE B 44   | -46.494 | -0.072 | 49.601 | 1.00 | 49.27 |      | H0 |
| ANISOU 3884 HG13 ILE B 44 | 8090    | 6640   | 3980   | 300  | -680  | -610 | H0 |
| ATOM 3885 HG21 ILE B 44   | -45.030 | 3.284  | 47.812 | 1.00 | 49.41 |      | H0 |

|                           |         |        |        |      |       |      |    |
|---------------------------|---------|--------|--------|------|-------|------|----|
| ANISOU 3885 HG21 ILE B 44 | 8060    | 6480   | 4230   | -120 | -1020 | -840 | H0 |
| ATOM 3886 HG22 ILE B 44   | -44.731 | 2.933  | 49.330 | 1.00 | 51.20 |      | H0 |
| ANISOU 3886 HG22 ILE B 44 | 8460    | 6760   | 4230   | -40  | -1110 | -870 | H0 |
| ATOM 3887 HG23 ILE B 44   | -46.159 | 3.483  | 48.911 | 1.00 | 50.33 |      | H0 |
| ANISOU 3887 HG23 ILE B 44 | 8440    | 6520   | 4160   | 50   | -890  | -880 | H0 |
| ATOM 3888 HD11 ILE B 44   | -44.165 | -0.399 | 49.403 | 1.00 | 50.28 |      | H0 |
| ANISOU 3888 HD11 ILE B 44 | 8020    | 6930   | 4150   | 160  | -1020 | -600 | H0 |
| ATOM 3889 HD12 ILE B 44   | -44.597 | -0.344 | 50.930 | 1.00 | 52.04 |      | H0 |
| ANISOU 3889 HD12 ILE B 44 | 8520    | 7130   | 4120   | 280  | -1010 | -640 | H0 |
| ATOM 3890 HD13 ILE B 44   | -43.914 | 0.919  | 50.251 | 1.00 | 52.21 |      | H0 |
| ANISOU 3890 HD13 ILE B 44 | 8480    | 7110   | 4250   | 90   | -1170 | -740 | H0 |
| ATOM 3891 N THR B 45      | -46.855 | 2.035  | 45.356 | 1.00 | 41.41 |      | N0 |
| ANISOU 3891 N THR B 45    | 6680    | 5480   | 3570   | -20  | -620  | -650 | N0 |
| ATOM 3892 CA THR B 45     | -46.838 | 2.867  | 44.122 | 1.00 | 39.99 |      | C0 |
| ANISOU 3892 CA THR B 45   | 6410    | 5240   | 3540   | -120 | -620  | -660 | C0 |
| ATOM 3893 C THR B 45      | -48.114 | 2.644  | 43.294 | 1.00 | 37.91 |      | C0 |
| ANISOU 3893 C THR B 45    | 6070    | 4960   | 3370   | -40  | -440  | -610 | C0 |
| ATOM 3894 O THR B 45      | -48.296 | 3.387  | 42.314 | 1.00 | 37.35 |      | O0 |
| ANISOU 3894 O THR B 45    | 5970    | 4830   | 3400   | -90  | -420  | -620 | O0 |
| ATOM 3895 CB THR B 45     | -45.580 | 2.589  | 43.289 | 1.00 | 39.55 |      | C0 |
| ANISOU 3895 CB THR B 45   | 6160    | 5260   | 3600   | -260 | -740  | -630 | C0 |
| ATOM 3896 OG1 THR B 45    | -45.626 | 1.237  | 42.830 | 1.00 | 38.10 |      | O0 |
| ANISOU 3896 OG1 THR B 45  | 5800    | 5180   | 3490   | -210 | -660  | -530 | O0 |
| ATOM 3897 CG2 THR B 45    | -44.306 | 2.829  | 44.069 | 1.00 | 41.37 |      | C0 |
| ANISOU 3897 CG2 THR B 45  | 6430    | 5540   | 3750   | -360 | -940  | -670 | C0 |
| ATOM 3898 H THR B 45      | -46.474 | 1.217  | 45.234 | 1.00 | 41.10 |      | H0 |
| ANISOU 3898 H THR B 45    | 6530    | 5520   | 3570   | -20  | -630  | -600 | H0 |
| ATOM 3899 HA THR B 45     | -46.816 | 3.812  | 44.400 | 1.00 | 40.93 |      | H0 |
| ANISOU 3899 HA THR B 45   | 6670    | 5280   | 3610   | -150 | -670  | -730 | H0 |
| ATOM 3900 HB THR B 45     | -45.590 | 3.191  | 42.507 | 1.00 | 39.22 |      | H0 |
| ANISOU 3900 HB THR B 45   | 6080    | 5170   | 3640   | -330 | -740  | -630 | H0 |
| ATOM 3901 HG21 THR B 45   | -44.367 | 3.679  | 44.537 | 1.00 | 42.35 |      | H0 |
| ANISOU 3901 HG21 THR B 45 | 6700    | 5590   | 3800   | -390 | -990  | -750 | H0 |
| ATOM 3902 HG22 THR B 45   | -43.548 | 2.849  | 43.457 | 1.00 | 41.18 |      | H0 |
| ANISOU 3902 HG22 THR B 45 | 6270    | 5570   | 3810   | -460 | -1010 | -650 | H0 |
| ATOM 3903 HG23 THR B 45   | -44.181 | 2.112  | 44.716 | 1.00 | 41.57 |      | H0 |
| ANISOU 3903 HG23 THR B 45 | 6460    | 5640   | 3700   | -290 | -950  | -650 | H0 |
| ATOM 3904 N ASN B 46      | -48.952 | 1.666  | 43.655 | 1.00 | 36.76 |      | N0 |
| ANISOU 3904 N ASN B 46    | 5900    | 4860   | 3200   | 70   | -300  | -560 | N0 |
| ATOM 3905 CA ASN B 46     | -50.149 | 1.258  | 42.869 | 1.00 | 35.93 |      | C0 |
| ANISOU 3905 CA ASN B 46   | 5690    | 4770   | 3190   | 130  | -130  | -500 | C0 |
| ATOM 3906 C ASN B 46      | -49.741 | 0.970  | 41.414 | 1.00 | 34.92 |      | C0 |
| ANISOU 3906 C ASN B 46    | 5360    | 4680   | 3230   | 40   | -160  | -460 | C0 |
| ATOM 3907 O ASN B 46      | -50.359 | 1.544  | 40.485 | 1.00 | 34.10 |      | O0 |
| ANISOU 3907 O ASN B 46    | 5210    | 4540   | 3210   | 40   | -110  | -460 | O0 |
| ATOM 3908 CB ASN B 46     | -51.253 | 2.316  | 42.965 | 1.00 | 36.59 |      | C0 |
| ANISOU 3908 CB ASN B 46   | 5880    | 4780   | 3240   | 220  | -40   | -550 | C0 |
| ATOM 3909 CG ASN B 46     | -52.197 | 2.083  | 44.129 | 1.00 | 37.16 |      | C0 |
| ANISOU 3909 CG ASN B 46   | 6070    | 4870   | 3180   | 370  | 90    | -550 | C0 |
| ATOM 3910 OD1 ASN B 46    | -52.515 | 0.943  | 44.460 | 1.00 | 36.11 |      | O0 |
| ANISOU 3910 OD1 ASN B 46  | 5870    | 4810   | 3040   | 390  | 170   | -480 | O0 |
| ATOM 3911 ND2 ASN B 46    | -52.653 | 3.161  | 44.746 | 1.00 | 38.19 |      | N0 |
| ANISOU 3911 ND2 ASN B 46  | 6390    | 4920   | 3200   | 460  | 110   | -620 | N0 |
| ATOM 3912 H ASN B 46      | -48.839 | 1.179  | 44.415 | 1.00 | 37.50 |      | H0 |

|                           |         |        |        |      |       |      |    |
|---------------------------|---------|--------|--------|------|-------|------|----|
| ANISOU 3912 H ASN B 46    | 6050    | 4990   | 3210   | 120  | -300  | -550 | H0 |
| ATOM 3913 HA ASN B 46     | -50.499 | 0.424  | 43.260 | 1.00 | 35.89 |      | H0 |
| ANISOU 3913 HA ASN B 46   | 5660    | 4810   | 3160   | 180  | -60   | -460 | H0 |
| ATOM 3914 HB2 ASN B 46    | -50.839 | 3.196  | 43.064 | 1.00 | 37.11 |      | H0 |
| ANISOU 3914 HB2 ASN B 46  | 6050    | 4780   | 3270   | 190  | -120  | -600 | H0 |
| ATOM 3915 HB3 ASN B 46    | -51.769 | 2.319  | 42.136 | 1.00 | 35.77 |      | H0 |
| ANISOU 3915 HB3 ASN B 46  | 5670    | 4690   | 3230   | 230  | 20    | -520 | H0 |
| ATOM 3916 HD21 ASN B 46   | -52.923 | 3.108  | 45.587 | 1.00 | 39.14 |      | H0 |
| ANISOU 3916 HD21 ASN B 46 | 6620    | 5040   | 3220   | 530  | 160   | -630 | H0 |
| ATOM 3917 HD22 ASN B 46   | -52.689 | 3.935  | 44.319 | 1.00 | 38.37 |      | H0 |
| ANISOU 3917 HD22 ASN B 46 | 6450    | 4880   | 3260   | 450  | 90    | -650 | H0 |
| ATOM 3918 N GLU B 47      | -48.744 | 0.100  | 41.223 | 1.00 | 34.70 |      | N0 |
| ANISOU 3918 N GLU B 47    | 5230    | 4720   | 3240   | -20  | -230  | -420 | N0 |
| ATOM 3919 CA GLU B 47     | -48.237 | -0.310 | 39.888 | 1.00 | 34.32 |      | C0 |
| ANISOU 3919 CA GLU B 47   | 5000    | 4710   | 3330   | -100 | -250  | -380 | C0 |
| ATOM 3920 C GLU B 47      | -48.169 | -1.837 | 39.812 | 1.00 | 34.61 |      | C0 |
| ANISOU 3920 C GLU B 47    | 4950    | 4820   | 3390   | -70  | -190  | -310 | C0 |
| ATOM 3921 O GLU B 47      | -47.808 | -2.476 | 40.832 | 1.00 | 34.26 |      | O0 |
| ANISOU 3921 O GLU B 47    | 4970    | 4800   | 3250   | -20  | -220  | -290 | O0 |
| ATOM 3922 CB GLU B 47     | -46.874 | 0.321  | 39.608 | 1.00 | 35.29 |      | C0 |
| ANISOU 3922 CB GLU B 47   | 5090    | 4840   | 3480   | -220 | -400  | -400 | C0 |
| ATOM 3923 CG GLU B 47     | -46.934 | 1.832  | 39.468 | 1.00 | 36.31 |      | C0 |
| ANISOU 3923 CG GLU B 47   | 5320    | 4870   | 3600   | -280 | -450  | -470 | C0 |
| ATOM 3924 CD GLU B 47     | -45.578 | 2.503  | 39.360 | 1.00 | 37.97 |      | C0 |
| ANISOU 3924 CD GLU B 47   | 5510    | 5090   | 3820   | -420 | -600  | -490 | C0 |
| ATOM 3925 OE1 GLU B 47    | -45.502 | 3.723  | 39.606 | 1.00 | 39.66 |      | O0 |
| ANISOU 3925 OE1 GLU B 47  | 5870    | 5200   | 4000   | -480 | -660  | -560 | O0 |
| ATOM 3926 OE2 GLU B 47    | -44.602 | 1.807  | 39.015 | 1.00 | 38.81 |      | O0 |
| ANISOU 3926 OE2 GLU B 47  | 5460    | 5300   | 3980   | -470 | -660  | -450 | O0 |
| ATOM 3927 H GLU B 47      | -48.309 | -0.301 | 41.915 | 1.00 | 35.32 |      | H0 |
| ANISOU 3927 H GLU B 47    | 5350    | 4820   | 3250   | -10  | -270  | -420 | H0 |
| ATOM 3928 HA GLU B 47     | -48.872 | 0.007  | 39.211 | 1.00 | 33.97 |      | H0 |
| ANISOU 3928 HA GLU B 47   | 4920    | 4640   | 3340   | -100 | -190  | -380 | H0 |
| ATOM 3929 HB2 GLU B 47    | -46.265 | 0.091  | 40.340 | 1.00 | 35.92 |      | H0 |
| ANISOU 3929 HB2 GLU B 47  | 5200    | 4960   | 3490   | -210 | -470  | -410 | H0 |
| ATOM 3930 HB3 GLU B 47    | -46.514 | -0.063 | 38.781 | 1.00 | 34.62 |      | H0 |
| ANISOU 3930 HB3 GLU B 47  | 4880    | 4800   | 3470   | -250 | -400  | -370 | H0 |
| ATOM 3931 HG2 GLU B 47    | -47.456 | 2.057  | 38.669 | 1.00 | 35.80 |      | H0 |
| ANISOU 3931 HG2 GLU B 47  | 5220    | 4780   | 3600   | -270 | -390  | -450 | H0 |
| ATOM 3932 HG3 GLU B 47    | -47.403 | 2.206  | 40.242 | 1.00 | 37.05 |      | H0 |
| ANISOU 3932 HG3 GLU B 47  | 5550    | 4920   | 3610   | -220 | -430  | -500 | H0 |
| ATOM 3933 N VAL B 48      | -48.526 | -2.383 | 38.641 | 1.00 | 34.68 |      | N0 |
| ANISOU 3933 N VAL B 48    | 4830    | 4840   | 3510   | -90  | -130  | -270 | N0 |
| ATOM 3934 CA VAL B 48     | -48.532 | -3.842 | 38.328 | 1.00 | 35.12 |      | C0 |
| ANISOU 3934 CA VAL B 48   | 4810    | 4930   | 3600   | -70  | -60   | -210 | C0 |
| ATOM 3935 C VAL B 48      | -47.858 | -4.055 | 36.969 | 1.00 | 35.06 |      | C0 |
| ANISOU 3935 C VAL B 48    | 4670    | 4950   | 3700   | -130 | -100  | -200 | C0 |
| ATOM 3936 O VAL B 48      | -48.094 | -3.257 | 36.058 | 1.00 | 35.30 |      | O0 |
| ANISOU 3936 O VAL B 48    | 4660    | 4970   | 3790   | -180 | -100  | -220 | O0 |
| ATOM 3937 CB VAL B 48     | -49.960 | -4.424 | 38.329 | 1.00 | 35.34 |      | C0 |
| ANISOU 3937 CB VAL B 48   | 4840    | 4940   | 3640   | -40  | 80    | -190 | C0 |
| ATOM 3938 CG1 VAL B 48    | -50.696 | -4.131 | 39.625 | 1.00 | 36.57 |      | C0 |
| ANISOU 3938 CG1 VAL B 48  | 5120    | 5080   | 3690   | 30   | 140   | -200 | C0 |
| ATOM 3939 CG2 VAL B 48    | -50.773 | -3.934 | 37.141 | 1.00 | 35.33 |      | C0 |

|                           |         |        |        |      |       |      |    |
|---------------------------|---------|--------|--------|------|-------|------|----|
| ANISOU 3939 CG2 VAL B 48  | 4750    | 4940   | 3730   | -80  | 120   | -210 | C0 |
| ATOM 3940 H VAL B 48      | -48.795 | -1.873 | 37.936 | 1.00 | 34.26 |      | H0 |
| ANISOU 3940 H VAL B 48    | 4740    | 4770   | 3510   | -120 | -120  | -280 | H0 |
| ATOM 3941 HA VAL B 48     | -48.012 | -4.302 | 39.008 | 1.00 | 35.66 |      | H0 |
| ANISOU 3941 HA VAL B 48   | 4920    | 5020   | 3610   | -40  | -100  | -200 | H0 |
| ATOM 3942 HB VAL B 48     | -49.876 | -5.407 | 38.248 | 1.00 | 35.36 |      | H0 |
| ANISOU 3942 HB VAL B 48   | 4830    | 4950   | 3660   | -40  | 110   | -160 | H0 |
| ATOM 3943 HG11 VAL B 48   | -50.132 | -4.370 | 40.381 | 1.00 | 36.99 |      | H0 |
| ANISOU 3943 HG11 VAL B 48 | 5250    | 5140   | 3670   | 50   | 100   | -200 | H0 |
| ATOM 3944 HG12 VAL B 48   | -51.518 | -4.651 | 39.657 | 1.00 | 36.50 |      | H0 |
| ANISOU 3944 HG12 VAL B 48 | 5100    | 5080   | 3690   | 40   | 230   | -180 | H0 |
| ATOM 3945 HG13 VAL B 48   | -50.911 | -3.183 | 39.668 | 1.00 | 36.61 |      | H0 |
| ANISOU 3945 HG13 VAL B 48 | 5160    | 5070   | 3680   | 30   | 120   | -240 | H0 |
| ATOM 3946 HG21 VAL B 48   | -50.642 | -2.977 | 37.032 | 1.00 | 35.18 |      | H0 |
| ANISOU 3946 HG21 VAL B 48 | 4750    | 4910   | 3710   | -80  | 70    | -240 | H0 |
| ATOM 3947 HG22 VAL B 48   | -51.715 | -4.116 | 37.297 | 1.00 | 35.28 |      | H0 |
| ANISOU 3947 HG22 VAL B 48 | 4740    | 4940   | 3720   | -50  | 200   | -200 | H0 |
| ATOM 3948 HG23 VAL B 48   | -50.485 | -4.396 | 36.335 | 1.00 | 34.63 |      | H0 |
| ANISOU 3948 HG23 VAL B 48 | 4590    | 4860   | 3700   | -110 | 110   | -190 | H0 |
| ATOM 3949 N ASP B 49      | -47.052 | -5.109 | 36.868 | 1.00 | 36.21 |      | N0 |
| ANISOU 3949 N ASP B 49    | 4770    | 5140   | 3850   | -110 | -110  | -160 | N0 |
| ATOM 3950 CA ASP B 49     | -46.424 | -5.616 | 35.624 | 1.00 | 36.96 |      | C0 |
| ANISOU 3950 CA ASP B 49   | 4750    | 5260   | 4030   | -130 | -110  | -130 | C0 |
| ATOM 3951 C ASP B 49      | -47.208 | -6.868 | 35.244 | 1.00 | 36.46 |      | C0 |
| ANISOU 3951 C ASP B 49    | 4700    | 5160   | 3990   | -100 | -10   | -110 | C0 |
| ATOM 3952 O ASP B 49      | -47.251 | -7.791 | 36.074 | 1.00 | 36.55 |      | O0 |
| ANISOU 3952 O ASP B 49    | 4790    | 5150   | 3940   | -50  | 30    | -70  | O0 |
| ATOM 3953 CB ASP B 49     | -44.942 | -5.906 | 35.879 | 1.00 | 39.84 |      | C0 |
| ANISOU 3953 CB ASP B 49   | 5070    | 5700   | 4370   | -110 | -210  | -110 | C0 |
| ATOM 3954 CG ASP B 49     | -44.031 | -5.825 | 34.672 | 1.00 | 40.31 |      | C0 |
| ANISOU 3954 CG ASP B 49   | 4990    | 5820   | 4500   | -140 | -230  | -90  | C0 |
| ATOM 3955 OD1 ASP B 49    | -44.488 | -6.137 | 33.562 | 1.00 | 43.35 |      | O0 |
| ANISOU 3955 OD1 ASP B 49  | 5350    | 6180   | 4950   | -150 | -160  | -90  | O0 |
| ATOM 3956 OD2 ASP B 49    | -42.854 | -5.489 | 34.864 | 1.00 | 42.70 |      | O0 |
| ANISOU 3956 OD2 ASP B 49  | 5220    | 6200   | 4800   | -160 | -320  | -80  | O0 |
| ATOM 3957 H ASP B 49      | -46.828 | -5.608 | 37.597 | 1.00 | 36.71 |      | H0 |
| ANISOU 3957 H ASP B 49    | 4880    | 5210   | 3860   | -60  | -120  | -140 | H0 |
| ATOM 3958 HA ASP B 49     | -46.513 | -4.939 | 34.913 | 1.00 | 36.74 |      | H0 |
| ANISOU 3958 HA ASP B 49   | 4680    | 5230   | 4040   | -180 | -120  | -150 | H0 |
| ATOM 3959 HB2 ASP B 49    | -44.611 | -5.281 | 36.548 | 1.00 | 40.01 |      | H0 |
| ANISOU 3959 HB2 ASP B 49  | 5120    | 5740   | 4350   | -120 | -280  | -130 | H0 |
| ATOM 3960 HB3 ASP B 49    | -44.860 | -6.808 | 36.248 | 1.00 | 39.73 |      | H0 |
| ANISOU 3960 HB3 ASP B 49  | 5080    | 5690   | 4330   | -40  | -180  | -80  | H0 |
| ATOM 3961 N VAL B 50      | -47.871 | -6.867 | 34.085 | 1.00 | 35.91 |      | N0 |
| ANISOU 3961 N VAL B 50    | 4580    | 5080   | 3990   | -150 | 40    | -120 | N0 |
| ATOM 3962 CA VAL B 50     | -48.745 | -7.990 | 33.635 | 1.00 | 35.63 |      | C0 |
| ANISOU 3962 CA VAL B 50   | 4560    | 5000   | 3970   | -160 | 140   | -110 | C0 |
| ATOM 3963 C VAL B 50      | -48.327 | -8.444 | 32.225 | 1.00 | 34.69 |      | C0 |
| ANISOU 3963 C VAL B 50    | 4380    | 4890   | 3910   | -180 | 140   | -110 | C0 |
| ATOM 3964 O VAL B 50      | -47.925 | -7.590 | 31.406 | 1.00 | 32.12 |      | O0 |
| ANISOU 3964 O VAL B 50    | 3980    | 4600   | 3620   | -200 | 90    | -120 | O0 |
| ATOM 3965 CB VAL B 50     | -50.238 | -7.609 | 33.691 | 1.00 | 36.13 |      | C0 |
| ANISOU 3965 CB VAL B 50   | 4620    | 5050   | 4050   | -200 | 200   | -130 | C0 |
| ATOM 3966 CG1 VAL B 50    | -50.724 | -7.413 | 35.117 | 1.00 | 37.38 |      | C0 |



|                           |         |         |        |      |       |      |    |
|---------------------------|---------|---------|--------|------|-------|------|----|
| ANISOU 3966 CG1 VAL B 50  | 4860    | 5200    | 4140   | -160 | 230   | -120 | C0 |
| ATOM 3967 CG2 VAL B 50    | -50.550 | -6.381  | 32.863 | 1.00 | 36.09 |      | C0 |
| ANISOU 3967 CG2 VAL B 50  | 4550    | 5080    | 4090   | -220 | 160   | -160 | C0 |
| ATOM 3968 H VAL B 50      | -47.819 | -6.181  | 33.488 | 1.00 | 35.57 |      | H0 |
| ANISOU 3968 H VAL B 50    | 4490    | 5050    | 3970   | -180 | 20    | -130 | H0 |
| ATOM 3969 HA VAL B 50     | -48.606 | -8.739  | 34.242 | 1.00 | 36.06 |      | H0 |
| ANISOU 3969 HA VAL B 50   | 4670    | 5040    | 3990   | -120 | 160   | -80  | H0 |
| ATOM 3970 HB VAL B 50     | -50.747 | -8.364  | 33.305 | 1.00 | 36.27 |      | H0 |
| ANISOU 3970 HB VAL B 50   | 4630    | 5050    | 4090   | -220 | 250   | -120 | H0 |
| ATOM 3971 HG11 VAL B 50   | -50.513 | -8.203  | 35.643 | 1.00 | 37.54 |      | H0 |
| ANISOU 3971 HG11 VAL B 50 | 4930    | 5200    | 4130   | -140 | 260   | -90  | H0 |
| ATOM 3972 HG12 VAL B 50   | -51.687 | -7.272  | 35.116 | 1.00 | 37.25 |      | H0 |
| ANISOU 3972 HG12 VAL B 50 | 4830    | 5190    | 4140   | -180 | 290   | -120 | H0 |
| ATOM 3973 HG13 VAL B 50   | -50.284 | -6.637  | 35.506 | 1.00 | 37.23 |      | H0 |
| ANISOU 3973 HG13 VAL B 50 | 4860    | 5200    | 4090   | -140 | 180   | -130 | H0 |
| ATOM 3974 HG21 VAL B 50   | -50.051 | -5.622  | 33.208 | 1.00 | 35.98 |      | H0 |
| ANISOU 3974 HG21 VAL B 50 | 4550    | 5070    | 4050   | -210 | 110   | -170 | H0 |
| ATOM 3975 HG22 VAL B 50   | -51.503 | -6.190  | 32.913 | 1.00 | 36.04 |      | H0 |
| ANISOU 3975 HG22 VAL B 50 | 4530    | 5070    | 4090   | -230 | 200   | -170 | H0 |
| ATOM 3976 HG23 VAL B 50   | -50.301 | -6.538  | 31.937 | 1.00 | 35.62 |      | H0 |
| ANISOU 3976 HG23 VAL B 50 | 4450    | 5030    | 4060   | -250 | 150   | -160 | H0 |
| ATOM 3977 N VAL B 51      | -48.419 | -9.754  | 31.981 | 1.00 | 33.98 |      | N0 |
| ANISOU 3977 N VAL B 51    | 4330    | 4750    | 3820   | -160 | 190   | -90  | N0 |
| ATOM 3978 CA VAL B 51     | -48.334 | -10.386 | 30.634 | 1.00 | 33.39 |      | C0 |
| ANISOU 3978 CA VAL B 51   | 4240    | 4660    | 3780   | -180 | 220   | -110 | C0 |
| ATOM 3979 C VAL B 51      | -49.744 | -10.843 | 30.254 | 1.00 | 32.93 |      | C0 |
| ANISOU 3979 C VAL B 51    | 4210    | 4560    | 3750   | -260 | 270   | -130 | C0 |
| ATOM 3980 O VAL B 51      | -50.382 | -11.559 | 31.054 | 1.00 | 33.23 |      | O0 |
| ANISOU 3980 O VAL B 51    | 4310    | 4540    | 3770   | -280 | 330   | -120 | O0 |
| ATOM 3981 CB VAL B 51     | -47.330 | -11.554 | 30.594 | 1.00 | 33.97 |      | C0 |
| ANISOU 3981 CB VAL B 51   | 4380    | 4700    | 3830   | -90  | 230   | -80  | C0 |
| ATOM 3982 CG1 VAL B 51    | -47.125 | -12.060 | 29.169 | 1.00 | 34.19 |      | C0 |
| ANISOU 3982 CG1 VAL B 51  | 4400    | 4720    | 3880   | -90  | 260   | -100 | C0 |
| ATOM 3983 CG2 VAL B 51    | -45.994 | -11.173 | 31.219 | 1.00 | 33.96 |      | C0 |
| ANISOU 3983 CG2 VAL B 51  | 4330    | 4780    | 3800   | -10  | 170   | -40  | C0 |
| ATOM 3984 H VAL B 51      | -48.544 | -10.362 | 32.647 | 1.00 | 34.50 |      | H0 |
| ANISOU 3984 H VAL B 51    | 4460    | 4790    | 3860   | -140 | 220   | -70  | H0 |
| ATOM 3985 HA VAL B 51     | -48.046 | -9.712  | 29.998 | 1.00 | 33.04 |      | H0 |
| ANISOU 3985 HA VAL B 51   | 4140    | 4660    | 3760   | -190 | 180   | -120 | H0 |
| ATOM 3986 HB VAL B 51     | -47.713 | -12.294 | 31.126 | 1.00 | 34.37 |      | H0 |
| ANISOU 3986 HB VAL B 51   | 4510    | 4690    | 3860   | -90  | 280   | -70  | H0 |
| ATOM 3987 HG11 VAL B 51   | -47.936 | -12.500 | 28.859 | 1.00 | 34.22 |      | H0 |
| ANISOU 3987 HG11 VAL B 51 | 4450    | 4670    | 3890   | -150 | 290   | -130 | H0 |
| ATOM 3988 HG12 VAL B 51   | -46.388 | -12.695 | 29.151 | 1.00 | 34.62 |      | H0 |
| ANISOU 3988 HG12 VAL B 51 | 4490    | 4760    | 3910   | -20  | 270   | -80  | H0 |
| ATOM 3989 HG13 VAL B 51   | -46.921 | -11.311 | 28.583 | 1.00 | 33.76 |      | H0 |
| ANISOU 3989 HG13 VAL B 51 | 4270    | 4720    | 3840   | -110 | 230   | -110 | H0 |
| ATOM 3990 HG21 VAL B 51   | -45.666 | -10.353 | 30.812 | 1.00 | 33.75 |      | H0 |
| ANISOU 3990 HG21 VAL B 51 | 4220    | 4810    | 3790   | -30  | 130   | -50  | H0 |
| ATOM 3991 HG22 VAL B 51   | -45.350 | -11.887 | 31.072 | 1.00 | 34.55 |      | H0 |
| ANISOU 3991 HG22 VAL B 51 | 4420    | 4840    | 3860   | 60   | 180   | -20  | H0 |
| ATOM 3992 HG23 VAL B 51   | -46.110 | -11.036 | 32.175 | 1.00 | 34.25 |      | H0 |
| ANISOU 3992 HG23 VAL B 51 | 4400    | 4810    | 3810   | 0    | 160   | -30  | H0 |
| ATOM 3993 N PHE B 52      | -50.219 | -10.418 | 29.084 | 1.00 | 32.39 |      | N0 |

|                          |         |         |        |      |       |      |    |
|--------------------------|---------|---------|--------|------|-------|------|----|
| ANISOU 3993 N PHE B 52   | 4070    | 4520    | 3710   | -310 | 250   | -170 | N0 |
| ATOM 3994 CA PHE B 52    | -51.577 | -10.716 | 28.568 | 1.00 | 32.39 |      | C0 |
| ANISOU 3994 CA PHE B 52  | 4060    | 4510    | 3740   | -400 | 280   | -200 | C0 |
| ATOM 3995 C PHE B 52     | -51.541 | -10.797 | 27.044 | 1.00 | 31.98 |      | C0 |
| ANISOU 3995 C PHE B 52   | 3980    | 4470    | 3690   | -430 | 250   | -240 | C0 |
| ATOM 3996 O PHE B 52     | -50.749 | -10.061 | 26.423 | 1.00 | 30.41 |      | O0 |
| ANISOU 3996 O PHE B 52   | 3750    | 4320    | 3490   | -380 | 210   | -230 | O0 |
| ATOM 3997 CB PHE B 52    | -52.569 | -9.634  | 29.009 | 1.00 | 32.32 |      | C0 |
| ANISOU 3997 CB PHE B 52  | 3970    | 4560    | 3750   | -430 | 280   | -200 | C0 |
| ATOM 3998 CG PHE B 52    | -52.160 | -8.224  | 28.667 | 1.00 | 31.62 |      | C0 |
| ANISOU 3998 CG PHE B 52  | 3830    | 4530    | 3660   | -380 | 220   | -200 | C0 |
| ATOM 3999 CD1 PHE B 52   | -51.257 | -7.531  | 29.459 | 1.00 | 31.94 |      | C0 |
| ANISOU 3999 CD1 PHE B 52 | 3890    | 4570    | 3680   | -330 | 190   | -180 | C0 |
| ATOM 4000 CD2 PHE B 52   | -52.675 | -7.583  | 27.552 | 1.00 | 31.52 |      | C0 |
| ANISOU 4000 CD2 PHE B 52 | 3750    | 4560    | 3660   | -400 | 180   | -230 | C0 |
| ATOM 4001 CE1 PHE B 52   | -50.878 | -6.235  | 29.141 | 1.00 | 31.18 |      | C0 |
| ANISOU 4001 CE1 PHE B 52 | 3760    | 4500    | 3580   | -310 | 140   | -190 | C0 |
| ATOM 4002 CE2 PHE B 52   | -52.302 | -6.284  | 27.243 | 1.00 | 30.76 |      | C0 |
| ANISOU 4002 CE2 PHE B 52 | 3630    | 4490    | 3560   | -370 | 140   | -220 | C0 |
| ATOM 4003 CZ PHE B 52    | -51.410 | -5.610  | 28.039 | 1.00 | 30.54 |      | C0 |
| ANISOU 4003 CZ PHE B 52  | 3640    | 4450    | 3520   | -330 | 120   | -200 | C0 |
| ATOM 4004 H PHE B 52     | -49.734 | -9.903  | 28.509 | 1.00 | 32.10 |      | H0 |
| ANISOU 4004 H PHE B 52   | 4000    | 4520    | 3680   | -300 | 220   | -170 | H0 |
| ATOM 4005 HA PHE B 52    | -51.871 | -11.589 | 28.928 | 1.00 | 32.89 |      | H0 |
| ANISOU 4005 HA PHE B 52  | 4180    | 4520    | 3800   | -430 | 330   | -190 | H0 |
| ATOM 4006 HB2 PHE B 52   | -53.435 | -9.821  | 28.590 | 1.00 | 32.56 |      | H0 |
| ANISOU 4006 HB2 PHE B 52 | 3970    | 4610    | 3800   | -480 | 290   | -220 | H0 |
| ATOM 4007 HB3 PHE B 52   | -52.686 | -9.701  | 29.979 | 1.00 | 32.46 |      | H0 |
| ANISOU 4007 HB3 PHE B 52 | 4020    | 4570    | 3750   | -410 | 310   | -180 | H0 |
| ATOM 4008 HD1 PHE B 52   | -50.890 | -7.952  | 30.220 | 1.00 | 31.85 |      | H0 |
| ANISOU 4008 HD1 PHE B 52 | 3920    | 4540    | 3640   | -310 | 200   | -170 | H0 |
| ATOM 4009 HD2 PHE B 52   | -53.295 | -8.035  | 27.002 | 1.00 | 31.71 |      | H0 |
| ANISOU 4009 HD2 PHE B 52 | 3760    | 4590    | 3700   | -450 | 190   | -240 | H0 |
| ATOM 4010 HE1 PHE B 52   | -50.263 | -5.777  | 29.691 | 1.00 | 31.17 |      | H0 |
| ANISOU 4010 HE1 PHE B 52 | 3780    | 4500    | 3560   | -300 | 110   | -180 | H0 |
| ATOM 4011 HE2 PHE B 52   | -52.665 | -5.862  | 26.482 | 1.00 | 30.92 |      | H0 |
| ANISOU 4011 HE2 PHE B 52 | 3620    | 4540    | 3590   | -370 | 110   | -230 | H0 |
| ATOM 4012 HZ PHE B 52    | -51.151 | -4.729  | 27.821 | 1.00 | 30.61 |      | H0 |
| ANISOU 4012 HZ PHE B 52  | 3640    | 4460    | 3530   | -320 | 90    | -200 | H0 |
| ATOM 4013 N TRP B 53     | -52.385 | -11.659 | 26.470 | 1.00 | 32.71 |      | N0 |
| ANISOU 4013 N TRP B 53   | 4110    | 4530    | 3790   | -510 | 270   | -270 | N0 |
| ATOM 4014 CA TRP B 53    | -52.742 | -11.620 | 25.029 | 1.00 | 32.70 |      | C0 |
| ANISOU 4014 CA TRP B 53  | 4080    | 4560    | 3790   | -560 | 230   | -320 | C0 |
| ATOM 4015 C TRP B 53     | -53.785 | -10.521 | 24.857 | 1.00 | 32.55 |      | C0 |
| ANISOU 4015 C TRP B 53   | 3940    | 4640    | 3790   | -590 | 190   | -330 | C0 |
| ATOM 4016 O TRP B 53     | -54.814 | -10.577 | 25.562 | 1.00 | 33.86 |      | O0 |
| ANISOU 4016 O TRP B 53   | 4050    | 4820    | 3990   | -650 | 210   | -320 | O0 |
| ATOM 4017 CB TRP B 53    | -53.286 | -12.956 | 24.511 | 1.00 | 33.70 |      | C0 |
| ANISOU 4017 CB TRP B 53  | 4290    | 4600    | 3910   | -650 | 250   | -370 | C0 |
| ATOM 4018 CG TRP B 53    | -52.431 | -14.153 | 24.778 | 1.00 | 34.16 |      | C0 |
| ANISOU 4018 CG TRP B 53  | 4500    | 4540    | 3940   | -610 | 300   | -360 | C0 |
| ATOM 4019 CD1 TRP B 53   | -51.097 | -14.187 | 25.063 | 1.00 | 33.64 |      | C0 |
| ANISOU 4019 CD1 TRP B 53 | 4480    | 4460    | 3840   | -470 | 320   | -320 | C0 |
| ATOM 4020 CD2 TRP B 53   | -52.873 | -15.520 | 24.743 | 1.00 | 35.31 |      | C0 |

|             |              |         |         |        |       |       |      |    |
|-------------|--------------|---------|---------|--------|-------|-------|------|----|
| ANISOU 4020 | CD2 TRP B 53 | 4780    | 4560    | 4070   | -690  | 340   | -390 | C0 |
| ATOM 4021   | NE1 TRP B 53 | -50.686 | -15.483 | 25.229 | 1.00  | 34.56 |      | N0 |
| ANISOU 4021 | NE1 TRP B 53 | 4750    | 4450    | 3930   | -440  | 370   | -320 | N0 |
| ATOM 4022   | CE2 TRP B 53 | -51.750 | -16.322 | 25.035 | 1.00  | 35.35 |      | C0 |
| ANISOU 4022 | CE2 TRP B 53 | 4930    | 4460    | 4040   | -580  | 390   | -370 | C0 |
| ATOM 4023   | CE3 TRP B 53 | -54.109 | -16.136 | 24.515 | 1.00  | 36.67 |      | C0 |
| ANISOU 4023 | CE3 TRP B 53 | 4970    | 4700    | 4270   | -860  | 340   | -440 | C0 |
| ATOM 4024   | CZ2 TRP B 53 | -51.830 | -17.712 | 25.097 | 1.00  | 36.96 |      | C0 |
| ANISOU 4024 | CZ2 TRP B 53 | 5320    | 4510    | 4220   | -620  | 440   | -380 | C0 |
| ATOM 4025   | CZ3 TRP B 53 | -54.189 | -17.510 | 24.580 | 1.00  | 37.95 |      | C0 |
| ANISOU 4025 | CZ3 TRP B 53 | 5310    | 4700    | 4410   | -930  | 380   | -460 | C0 |
| ATOM 4026   | CH2 TRP B 53 | -53.063 | -18.283 | 24.867 | 1.00  | 38.20 |      | C0 |
| ANISOU 4026 | CH2 TRP B 53 | 5510    | 4610    | 4400   | -800  | 440   | -430 | C0 |
| ATOM 4027   | H TRP B 53   | -52.802 | -12.326 | 26.930 | 1.00  | 33.12 |      | H0 |
| ANISOU 4027 | H TRP B 53   | 4200    | 4540    | 3850   | -550  | 310   | -270 | H0 |
| ATOM 4028   | HA TRP B 53  | -51.935 | -11.392 | 24.515 | 1.00  | 32.45 |      | H0 |
| ANISOU 4028 | HA TRP B 53  | 4060    | 4530    | 3740   | -500  | 210   | -320 | H0 |
| ATOM 4029   | HB2 TRP B 53 | -54.165 | -13.102 | 24.917 | 1.00  | 34.10 |      | H0 |
| ANISOU 4029 | HB2 TRP B 53 | 4310    | 4660    | 3980   | -730  | 260   | -370 | H0 |
| ATOM 4030   | HB3 TRP B 53 | -53.418 | -12.873 | 23.545 | 1.00  | 33.86 |      | H0 |
| ANISOU 4030 | HB3 TRP B 53 | 4310    | 4650    | 3910   | -670  | 210   | -400 | H0 |
| ATOM 4031   | HD1 TRP B 53 | -50.534 | -13.432 | 25.141 | 1.00  | 33.11 |      | H0 |
| ANISOU 4031 | HD1 TRP B 53 | 4350    | 4450    | 3780   | -410  | 300   | -300 | H0 |
| ATOM 4032   | HE1 TRP B 53 | -49.873 | -15.731 | 25.417 | 1.00  | 34.65 |      | H0 |
| ANISOU 4032 | HE1 TRP B 53 | 4810    | 4440    | 3920   | -350  | 390   | -300 | H0 |
| ATOM 4033   | HE3 TRP B 53 | -54.873 | -15.618 | 24.320 | 1.00  | 36.54 |      | H0 |
| ANISOU 4033 | HE3 TRP B 53 | 4840    | 4770    | 4280   | -930  | 300   | -450 | H0 |
| ATOM 4034   | HZ2 TRP B 53 | -51.074 | -18.236 | 25.297 | 1.00  | 37.24 |      | H0 |
| ANISOU 4034 | HZ2 TRP B 53 | 5450    | 4470    | 4230   | -520  | 480   | -360 | H0 |
| ATOM 4035   | HZ3 TRP B 53 | -55.016 | -17.937 | 24.421 | 1.00  | 38.80 |      | H0 |
| ANISOU 4035 | HZ3 TRP B 53 | 5420    | 4790    | 4540   | -1060 | 380   | -490 | H0 |
| ATOM 4036   | HH2 TRP B 53 | -53.147 | -19.216 | 24.904 | 1.00  | 39.13 |      | H0 |
| ANISOU 4036 | HH2 TRP B 53 | 5760    | 4600    | 4500   | -850  | 480   | -450 | H0 |
| ATOM 4037   | N GLN B 54   | -53.504 | -9.543  | 24.002 | 1.00  | 31.91 |      | N0 |
| ANISOU 4037 | N GLN B 54   | 3810    | 4610    | 3700   | -540  | 140   | -330 | N0 |
| ATOM 4038   | CA GLN B 54  | -54.476 | -8.498  | 23.604 | 1.00  | 32.61 |      | C0 |
| ANISOU 4038 | CA GLN B 54  | 3800    | 4790    | 3800   | -550  | 90    | -330 | C0 |
| ATOM 4039   | C GLN B 54   | -55.198 | -9.016  | 22.362 | 1.00  | 33.53 |      | C0 |
| ANISOU 4039 | C GLN B 54   | 3910    | 4940    | 3890   | -620  | 40    | -380 | C0 |
| ATOM 4040   | O GLN B 54   | -54.755 | -8.697  | 21.229 | 1.00  | 33.71 |      | O0 |
| ANISOU 4040 | O GLN B 54   | 3960    | 4980    | 3870   | -580  | 0     | -390 | O0 |
| ATOM 4041   | CB GLN B 54  | -53.756 | -7.173  | 23.380 | 1.00  | 32.70 |      | C0 |
| ANISOU 4041 | CB GLN B 54  | 3800    | 4830    | 3790   | -470  | 60    | -290 | C0 |
| ATOM 4042   | CG GLN B 54  | -54.694 | -6.010  | 23.118 | 1.00  | 33.47 |      | C0 |
| ANISOU 4042 | CG GLN B 54  | 3830    | 5000    | 3890   | -430  | 20    | -280 | C0 |
| ATOM 4043   | CD GLN B 54  | -54.010 | -4.702  | 23.419 | 1.00  | 34.67 |      | C0 |
| ANISOU 4043 | CD GLN B 54  | 4010    | 5130    | 4040   | -360  | 20    | -240 | C0 |
| ATOM 4044   | OE1 GLN B 54 | -53.494 | -4.484  | 24.520 | 1.00  | 36.26 |      | O0 |
| ANISOU 4044 | OE1 GLN B 54 | 4240    | 5290    | 4250   | -350  | 40    | -230 | O0 |
| ATOM 4045   | NE2 GLN B 54 | -53.988 | -3.818  | 22.436 | 1.00  | 35.11 |      | N0 |
| ANISOU 4045 | NE2 GLN B 54 | 4070    | 5210    | 4070   | -330  | -20   | -230 | N0 |
| ATOM 4046   | H GLN B 54   | -52.689 | -9.457  | 23.605 | 1.00  | 31.87 |      | H0 |
| ANISOU 4046 | H GLN B 54   | 3840    | 4600    | 3670   | -500  | 130   | -320 | H0 |
| ATOM 4047   | HA GLN B 54  | -55.133 | -8.385  | 24.330 | 1.00  | 32.81 |      | H0 |

|                           |         |         |        |       |       |      |    |
|---------------------------|---------|---------|--------|-------|-------|------|----|
| ANISOU 4047 HA GLN B 54   | 3790    | 4840    | 3850   | -560  | 110   | -320 | H0 |
| ATOM 4048 HB2 GLN B 54    | -53.214 | -6.978  | 24.172 | 1.00  | 32.32 |      | H0 |
| ANISOU 4048 HB2 GLN B 54  | 3780    | 4750    | 3750   | -440  | 90    | -270 | H0 |
| ATOM 4049 HB3 GLN B 54    | -53.147 | -7.272  | 22.618 | 1.00  | 32.62 |      | H0 |
| ANISOU 4049 HB3 GLN B 54  | 3830    | 4810    | 3760   | -450  | 50    | -300 | H0 |
| ATOM 4050 HG2 GLN B 54    | -54.980 | -6.024  | 22.179 | 1.00  | 34.06 |      | H0 |
| ANISOU 4050 HG2 GLN B 54  | 3890    | 5100    | 3940   | -440  | -10   | -300 | H0 |
| ATOM 4051 HG3 GLN B 54    | -55.492 | -6.098  | 23.682 | 1.00  | 34.02 |      | H0 |
| ANISOU 4051 HG3 GLN B 54  | 3850    | 5090    | 3980   | -450  | 40    | -290 | H0 |
| ATOM 4052 HE21 GLN B 54   | -53.453 | -3.115  | 22.486 | 1.00  | 34.86 |      | H0 |
| ANISOU 4052 HE21 GLN B 54 | 4070    | 5150    | 4030   | -300  | -20   | -200 | H0 |
| ATOM 4053 HE22 GLN B 54   | -54.508 | -3.926  | 21.728 | 1.00  | 35.38 |      | H0 |
| ANISOU 4053 HE22 GLN B 54 | 4080    | 5280    | 4080   | -330  | -50   | -240 | H0 |
| ATOM 4054 N GLN B 55      | -56.215 | -9.849  | 22.572 | 1.00  | 34.72 |      | N0 |
| ANISOU 4054 N GLN B 55    | 4030    | 5100    | 4070   | -720  | 40    | -410 | N0 |
| ATOM 4055 CA GLN B 55     | -56.924 | -10.557 | 21.478 | 1.00  | 37.37 |      | C0 |
| ANISOU 4055 CA GLN B 55   | 4360    | 5460    | 4380   | -820  | -10   | -470 | C0 |
| ATOM 4056 C GLN B 55      | -57.780 | -9.517  | 20.751 | 1.00  | 37.71 |      | C0 |
| ANISOU 4056 C GLN B 55    | 4280    | 5640    | 4410   | -790  | -100  | -470 | C0 |
| ATOM 4057 O GLN B 55      | -58.698 | -8.954  | 21.382 | 1.00  | 36.36 |      | O0 |
| ANISOU 4057 O GLN B 55    | 3980    | 5550    | 4280   | -780  | -90   | -440 | O0 |
| ATOM 4058 CB GLN B 55     | -57.711 | -11.753 | 22.012 | 1.00  | 39.37 |      | C0 |
| ANISOU 4058 CB GLN B 55   | 4620    | 5670    | 4670   | -960  | 20    | -490 | C0 |
| ATOM 4059 CG GLN B 55     | -56.819 | -12.827 | 22.624 | 1.00  | 40.49 |      | C0 |
| ANISOU 4059 CG GLN B 55   | 4920    | 5660    | 4810   | -970  | 100   | -490 | C0 |
| ATOM 4060 CD GLN B 55     | -57.602 | -13.932 | 23.290 | 1.00  | 42.94 |      | C0 |
| ANISOU 4060 CD GLN B 55   | 5260    | 5900    | 5160   | -1110 | 150   | -500 | C0 |
| ATOM 4061 OE1 GLN B 55    | -58.409 | -13.694 | 24.188 | 1.00  | 44.69 |      | O0 |
| ANISOU 4061 OE1 GLN B 55  | 5370    | 6180    | 5430   | -1160 | 190   | -460 | O0 |
| ATOM 4062 NE2 GLN B 55    | -57.363 | -15.161 | 22.860 | 1.00  | 44.92 |      | N0 |
| ANISOU 4062 NE2 GLN B 55  | 5670    | 6020    | 5380   | -1190 | 160   | -550 | N0 |
| ATOM 4063 H GLN B 55      | -56.538 | -10.034 | 23.404 | 1.00  | 35.11 |      | H0 |
| ANISOU 4063 H GLN B 55    | 4060    | 5140    | 4150   | -740  | 80    | -390 | H0 |
| ATOM 4064 HA GLN B 55     | -56.245 | -10.891 | 20.850 | 1.00  | 37.18 |      | H0 |
| ANISOU 4064 HA GLN B 55   | 4430    | 5380    | 4310   | -800  | -20   | -490 | H0 |
| ATOM 4065 HB2 GLN B 55    | -58.345 | -11.437 | 22.687 | 1.00  | 39.58 |      | H0 |
| ANISOU 4065 HB2 GLN B 55  | 4550    | 5750    | 4740   | -980  | 40    | -470 | H0 |
| ATOM 4066 HB3 GLN B 55    | -58.226 | -12.144 | 21.275 | 1.00  | 40.30 |      | H0 |
| ANISOU 4066 HB3 GLN B 55  | 4730    | 5810    | 4770   | -1040 | -30   | -540 | H0 |
| ATOM 4067 HG2 GLN B 55    | -56.254 | -13.211 | 21.921 | 1.00  | 40.58 |      | H0 |
| ANISOU 4067 HG2 GLN B 55  | 5030    | 5610    | 4780   | -950  | 80    | -520 | H0 |
| ATOM 4068 HG3 GLN B 55    | -56.228 | -12.412 | 23.288 | 1.00  | 39.67 |      | H0 |
| ANISOU 4068 HG3 GLN B 55  | 4830    | 5540    | 4710   | -880  | 140   | -450 | H0 |
| ATOM 4069 HE21 GLN B 55   | -57.604 | -15.856 | 23.352 | 1.00  | 45.24 |      | H0 |
| ANISOU 4069 HE21 GLN B 55 | 5760    | 5990    | 5440   | -1270 | 200   | -540 | H0 |
| ATOM 4070 HE22 GLN B 55   | -56.964 | -15.290 | 22.081 | 1.00  | 44.59 |      | H0 |
| ANISOU 4070 HE22 GLN B 55 | 5690    | 5960    | 5300   | -1170 | 120   | -580 | H0 |
| ATOM 4071 N THR B 56      | -57.437 | -9.247  | 19.489 | 1.00  | 37.08 |      | N0 |
| ANISOU 4071 N THR B 56    | 4240    | 5580    | 4270   | -750  | -160  | -490 | N0 |
| ATOM 4072 CA THR B 56     | -58.026 | -8.172  | 18.649 | 1.00  | 38.06 |      | C0 |
| ANISOU 4072 CA THR B 56   | 4280    | 5820    | 4350   | -690  | -240  | -470 | C0 |
| ATOM 4073 C THR B 56      | -58.502 | -8.791  | 17.334 | 1.00  | 38.68 |      | C0 |
| ANISOU 4073 C THR B 56    | 4390    | 5950    | 4360   | -760  | -340  | -540 | C0 |
| ATOM 4074 O THR B 56      | -57.661 | -9.381  | 16.634 | 1.00  | 38.69 |      | O0 |

|                           |         |         |        |       |       |      |    |
|---------------------------|---------|---------|--------|-------|-------|------|----|
| ANISOU 4074 O THR B 56    | 4530    | 5870    | 4300   | -760  | -330  | -580 | O0 |
| ATOM 4075 CB THR B 56     | -57.004 | -7.046  | 18.444 | 1.00  | 37.61 |      | C0 |
| ANISOU 4075 CB THR B 56   | 4290    | 5740    | 4260   | -560  | -220  | -420 | C0 |
| ATOM 4076 OG1 THR B 56    | -56.463 | -6.740  | 19.729 | 1.00  | 38.10 |      | O0 |
| ANISOU 4076 OG1 THR B 56  | 4350    | 5740    | 4380   | -520  | -140  | -380 | O0 |
| ATOM 4077 CG2 THR B 56    | -57.598 | -5.794  | 17.846 | 1.00  | 38.75 |      | C0 |
| ANISOU 4077 CG2 THR B 56  | 4370    | 5980    | 4380   | -470  | -290  | -380 | C0 |
| ATOM 4078 H THR B 56      | -56.798 | -9.719  | 19.042 | 1.00  | 37.35 |      | H0 |
| ANISOU 4078 H THR B 56    | 4370    | 5560    | 4260   | -750  | -150  | -510 | H0 |
| ATOM 4079 HA THR B 56     | -58.803 | -7.805  | 19.123 | 1.00  | 38.20 |      | H0 |
| ANISOU 4079 HA THR B 56   | 4200    | 5910    | 4410   | -690  | -250  | -460 | H0 |
| ATOM 4080 HB THR B 56     | -56.283 | -7.376  | 17.857 | 1.00  | 37.81 |      | H0 |
| ANISOU 4080 HB THR B 56   | 4400    | 5720    | 4240   | -550  | -220  | -430 | H0 |
| ATOM 4081 HG21 THR B 56   | -58.050 | -6.012  | 17.012 | 1.00  | 39.26 |      | H0 |
| ANISOU 4081 HG21 THR B 56 | 4420    | 6100    | 4400   | -490  | -350  | -410 | H0 |
| ATOM 4082 HG22 THR B 56   | -56.889 | -5.149  | 17.670 | 1.00  | 38.01 |      | H0 |
| ANISOU 4082 HG22 THR B 56 | 4330    | 5850    | 4260   | -400  | -270  | -350 | H0 |
| ATOM 4083 HG23 THR B 56   | -58.239 | -5.407  | 18.469 | 1.00  | 38.63 |      | H0 |
| ANISOU 4083 HG23 THR B 56 | 4270    | 6010    | 4400   | -450  | -290  | -360 | H0 |
| ATOM 4084 N THR B 57      | -59.799 | -8.697  | 17.035 | 1.00  | 39.61 |      | N0 |
| ANISOU 4084 N THR B 57    | 4370    | 6190    | 4490   | -810  | -430  | -560 | N0 |
| ATOM 4085 CA THR B 57     | -60.405 | -9.201  | 15.773 | 1.00  | 40.73 |      | C0 |
| ANISOU 4085 CA THR B 57   | 4520    | 6410    | 4550   | -890  | -550  | -630 | C0 |
| ATOM 4086 C THR B 57      | -61.237 | -8.083  | 15.144 | 1.00  | 40.74 |      | C0 |
| ANISOU 4086 C THR B 57    | 4390    | 6580    | 4520   | -800  | -650  | -600 | C0 |
| ATOM 4087 O THR B 57      | -61.809 | -7.267  | 15.902 | 1.00  | 39.93 |      | O0 |
| ANISOU 4087 O THR B 57    | 4140    | 6550    | 4480   | -730  | -630  | -540 | O0 |
| ATOM 4088 CB THR B 57     | -61.209 | -10.491 | 15.997 | 1.00  | 42.64 |      | C0 |
| ANISOU 4088 CB THR B 57   | 4720    | 6640    | 4840   | -1100 | -570  | -710 | C0 |
| ATOM 4089 OG1 THR B 57    | -62.258 | -10.255 | 16.933 | 1.00  | 43.96 |      | O0 |
| ANISOU 4089 OG1 THR B 57  | 4690    | 6910    | 5100   | -1140 | -560  | -670 | O0 |
| ATOM 4090 CG2 THR B 57    | -60.361 | -11.629 | 16.518 | 1.00  | 42.52 |      | C0 |
| ANISOU 4090 CG2 THR B 57  | 4880    | 6440    | 4840   | -1170 | -470  | -730 | C0 |
| ATOM 4091 H THR B 57      | -60.414 | -8.315  | 17.589 | 1.00  | 39.73 |      | H0 |
| ANISOU 4091 H THR B 57    | 4270    | 6270    | 4550   | -810  | -420  | -540 | H0 |
| ATOM 4092 HA THR B 57     | -59.668 | -9.409  | 15.159 | 1.00  | 40.54 |      | H0 |
| ANISOU 4092 HA THR B 57   | 4620    | 6320    | 4470   | -870  | -550  | -650 | H0 |
| ATOM 4093 HB THR B 57     | -61.605 | -10.761 | 15.134 | 1.00  | 43.93 |      | H0 |
| ANISOU 4093 HB THR B 57   | 4890    | 6850    | 4940   | -1150 | -670  | -760 | H0 |
| ATOM 4094 HG21 THR B 57   | -59.601 | -11.767 | 15.926 | 1.00  | 42.10 |      | H0 |
| ANISOU 4094 HG21 THR B 57 | 4960    | 6320    | 4720   | -1120 | -470  | -750 | H0 |
| ATOM 4095 HG22 THR B 57   | -60.894 | -12.443 | 16.555 | 1.00  | 43.46 |      | H0 |
| ANISOU 4095 HG22 THR B 57 | 5000    | 6540    | 4980   | -1310 | -490  | -780 | H0 |
| ATOM 4096 HG23 THR B 57   | -60.039 | -11.413 | 17.412 | 1.00  | 41.45 |      | H0 |
| ANISOU 4096 HG23 THR B 57 | 4730    | 6260    | 4760   | -1120 | -390  | -680 | H0 |
| ATOM 4097 N TRP B 58      | -61.265 | -8.037  | 13.809 | 1.00  | 40.78 |      | N0 |
| ANISOU 4097 N TRP B 58    | 4450    | 6630    | 4410   | -780  | -760  | -640 | N0 |
| ATOM 4098 CA TRP B 58     | -62.056 | -7.064  | 13.010 | 1.00  | 41.36 |      | C0 |
| ANISOU 4098 CA TRP B 58   | 4430    | 6870    | 4420   | -680  | -880  | -610 | C0 |
| ATOM 4099 C TRP B 58      | -62.128 | -7.538  | 11.557 | 1.00  | 42.92 |      | C0 |
| ANISOU 4099 C TRP B 58    | 4720    | 7110    | 4480   | -720  | -1010 | -680 | C0 |
| ATOM 4100 O TRP B 58      | -61.385 | -8.471  | 11.186 | 1.00  | 42.15 |      | O0 |
| ANISOU 4100 O TRP B 58    | 4800    | 6890    | 4330   | -800  | -970  | -740 | O0 |
| ATOM 4101 CB TRP B 58     | -61.478 | -5.644  | 13.115 | 1.00  | 39.95 |      | C0 |

|                          |         |        |        |      |       |      |    |
|--------------------------|---------|--------|--------|------|-------|------|----|
| ANISOU 4101 CB TRP B 58  | 4290    | 6670   | 4220   | -480 | -820  | -500 | C0 |
| ATOM 4102 CG TRP B 58    | -60.160 | -5.453 | 12.431 | 1.00 | 39.03 |      | C0 |
| ANISOU 4102 CG TRP B 58  | 4370    | 6440   | 4020   | -410 | -770  | -480 | C0 |
| ATOM 4103 CD1 TRP B 58   | -59.955 | -4.973 | 11.169 | 1.00 | 39.57 |      | C0 |
| ANISOU 4103 CD1 TRP B 58 | 4540    | 6540   | 3960   | -330 | -830  | -470 | C0 |
| ATOM 4104 CD2 TRP B 58   | -58.855 | -5.742 | 12.966 | 1.00 | 37.29 |      | C0 |
| ANISOU 4104 CD2 TRP B 58 | 4270    | 6060   | 3840   | -430 | -640  | -470 | C0 |
| ATOM 4105 NE1 TRP B 58   | -58.618 | -4.939 | 10.884 | 1.00 | 38.43 |      | N0 |
| ANISOU 4105 NE1 TRP B 58 | 4560    | 6270   | 3770   | -290 | -730  | -440 | N0 |
| ATOM 4106 CE2 TRP B 58   | -57.917 | -5.416 | 11.960 | 1.00 | 37.34 |      | C0 |
| ANISOU 4106 CE2 TRP B 58 | 4430    | 6020   | 3730   | -350 | -620  | -450 | C0 |
| ATOM 4107 CE3 TRP B 58   | -58.386 | -6.254 | 14.181 | 1.00 | 36.15 |      | C0 |
| ANISOU 4107 CE3 TRP B 58 | 4120    | 5820   | 3800   | -480 | -530  | -480 | C0 |
| ATOM 4108 CZ2 TRP B 58   | -56.544 | -5.578 | 12.143 | 1.00 | 36.05 |      | C0 |
| ANISOU 4108 CZ2 TRP B 58 | 4380    | 5740   | 3580   | -340 | -500  | -430 | C0 |
| ATOM 4109 CZ3 TRP B 58   | -57.029 | -6.413 | 14.362 | 1.00 | 35.09 |      | C0 |
| ANISOU 4109 CZ3 TRP B 58 | 4110    | 5560   | 3660   | -460 | -430  | -460 | C0 |
| ATOM 4110 CH2 TRP B 58   | -56.122 | -6.078 | 13.354 | 1.00 | 35.33 |      | C0 |
| ANISOU 4110 CH2 TRP B 58 | 4260    | 5570   | 3590   | -390 | -410  | -430 | C0 |
| ATOM 4111 H TRP B 58     | -60.786 | -8.615 | 13.292 | 1.00 | 40.98 |      | H0 |
| ANISOU 4111 H TRP B 58   | 4600    | 6590   | 4380   | -820 | -760  | -680 | H0 |
| ATOM 4112 HA TRP B 58    | -62.970 | -7.046 | 13.380 | 1.00 | 42.22 |      | H0 |
| ANISOU 4112 HA TRP B 58  | 4380    | 7080   | 4580   | -720 | -920  | -600 | H0 |
| ATOM 4113 HB2 TRP B 58   | -62.128 | -5.021 | 12.731 | 1.00 | 40.87 |      | H0 |
| ANISOU 4113 HB2 TRP B 58 | 4330    | 6890   | 4310   | -410 | -900  | -480 | H0 |
| ATOM 4114 HB3 TRP B 58   | -61.379 | -5.422 | 14.063 | 1.00 | 39.19 |      | H0 |
| ANISOU 4114 HB3 TRP B 58 | 4150    | 6530   | 4210   | -460 | -740  | -470 | H0 |
| ATOM 4115 HD1 TRP B 58   | -60.636 | -4.694 | 10.575 | 1.00 | 40.67 |      | H0 |
| ANISOU 4115 HD1 TRP B 58 | 4630    | 6780   | 4040   | -290 | -930  | -470 | H0 |
| ATOM 4116 HE1 TRP B 58   | -58.272 | -4.672 | 10.130 | 1.00 | 38.92 |      | H0 |
| ANISOU 4116 HE1 TRP B 58 | 4710    | 6340   | 3740   | -240 | -740  | -430 | H0 |
| ATOM 4117 HE3 TRP B 58   | -58.990 | -6.485 | 14.867 | 1.00 | 36.29 |      | H0 |
| ANISOU 4117 HE3 TRP B 58 | 4050    | 5860   | 3880   | -530 | -530  | -490 | H0 |
| ATOM 4118 HZ2 TRP B 58   | -55.932 | -5.350 | 11.467 | 1.00 | 36.30 |      | H0 |
| ANISOU 4118 HZ2 TRP B 58 | 4500    | 5760   | 3540   | -290 | -480  | -410 | H0 |
| ATOM 4119 HZ3 TRP B 58   | -56.706 | -6.756 | 15.180 | 1.00 | 34.50 |      | H0 |
| ANISOU 4119 HZ3 TRP B 58 | 4030    | 5430   | 3650   | -490 | -370  | -460 | H0 |
| ATOM 4120 HH2 TRP B 58   | -55.201 | -6.196 | 13.506 | 1.00 | 34.60 |      | H0 |
| ANISOU 4120 HH2 TRP B 58 | 4230    | 5410   | 3510   | -380 | -340  | -420 | H0 |
| ATOM 4121 N SER B 59     | -63.015 | -6.919 | 10.781 | 1.00 | 44.67 |      | N0 |
| ANISOU 4121 N SER B 59   | 4840    | 7500   | 4630   | -650 | -1150 | -670 | N0 |
| ATOM 4122 CA SER B 59    | -63.226 | -7.205 | 9.342  | 1.00 | 46.81 |      | C0 |
| ANISOU 4122 CA SER B 59  | 5200    | 7840   | 4740   | -670 | -1290 | -730 | C0 |
| ATOM 4123 C SER B 59     | -62.543 | -6.120 | 8.503  | 1.00 | 46.45 |      | C0 |
| ANISOU 4123 C SER B 59   | 5290    | 7790   | 4570   | -470 | -1290 | -650 | C0 |
| ATOM 4124 O SER B 59     | -62.748 | -4.920 | 8.795  | 1.00 | 45.96 |      | O0 |
| ANISOU 4124 O SER B 59   | 5150    | 7780   | 4530   | -310 | -1270 | -550 | O0 |
| ATOM 4125 CB SER B 59    | -64.685 | -7.311 | 9.024  | 1.00 | 49.11 |      | C0 |
| ANISOU 4125 CB SER B 59  | 5280    | 8350   | 5030   | -740 | -1470 | -770 | C0 |
| ATOM 4126 OG SER B 59    | -64.884 | -7.263 | 7.619  | 1.00 | 52.30 |      | O0 |
| ANISOU 4126 OG SER B 59  | 5770    | 8850   | 5260   | -710 | -1630 | -810 | O0 |
| ATOM 4127 H SER B 59     | -63.564 | -6.258 | 11.085 | 1.00 | 44.92 |      | H0 |
| ANISOU 4127 H SER B 59   | 4750    | 7620   | 4700   | -580 | -1160 | -620 | H0 |
| ATOM 4128 HA SER B 59    | -62.796 | -8.078 | 9.134  | 1.00 | 46.75 |      | H0 |

|                          |         |         |       |       |       |       |    |
|--------------------------|---------|---------|-------|-------|-------|-------|----|
| ANISOU 4128 HA SER B 59  | 5320    | 7740    | 4710  | -770  | -1280 | -800  | H0 |
| ATOM 4129 HB2 SER B 59   | -65.039 | -8.158  | 9.380 | 1.00  | 49.95 |       | H0 |
| ANISOU 4129 HB2 SER B 59 | 5330    | 8450    | 5190  | -910  | -1480 | -830  | H0 |
| ATOM 4130 HB3 SER B 59   | -65.171 | -6.570  | 9.452 | 1.00  | 49.43 |       | H0 |
| ANISOU 4130 HB3 SER B 59 | 5180    | 8480    | 5120  | -650  | -1470 | -700  | H0 |
| ATOM 4131 N ASP B 60     | -61.742 | -6.541  | 7.521 | 1.00  | 46.73 |       | N0 |
| ANISOU 4131 N ASP B 60   | 5540    | 7740    | 4470  | -470  | -1280 | -690  | N0 |
| ATOM 4132 CA ASP B 60    | -61.169 | -5.674  | 6.458 | 1.00  | 47.39 |       | C0 |
| ANISOU 4132 CA ASP B 60  | 5770    | 7830    | 4400  | -300  | -1290 | -630  | C0 |
| ATOM 4133 C ASP B 60     | -61.483 | -6.335  | 5.112 | 1.00  | 50.19 |       | C0 |
| ANISOU 4133 C ASP B 60   | 6240    | 8260    | 4570  | -350  | -1440 | -720  | C0 |
| ATOM 4134 O ASP B 60     | -60.737 | -7.244  | 4.708 | 1.00  | 49.28 |       | O0 |
| ANISOU 4134 O ASP B 60   | 6310    | 8030    | 4390  | -420  | -1390 | -800  | O0 |
| ATOM 4135 CB ASP B 60    | -59.671 | -5.438  | 6.684 | 1.00  | 45.45 |       | C0 |
| ANISOU 4135 CB ASP B 60  | 5690    | 7420    | 4160  | -240  | -1100 | -570  | C0 |
| ATOM 4136 CG ASP B 60    | -59.039 | -4.413  | 5.751 | 1.00  | 45.46 |       | C0 |
| ANISOU 4136 CG ASP B 60  | 5830    | 7420    | 4030  | -80   | -1070 | -470  | C0 |
| ATOM 4137 OD1 ASP B 60   | -59.653 | -4.095  | 4.712 | 1.00  | 46.67 |       | O0 |
| ANISOU 4137 OD1 ASP B 60 | 6010    | 7680    | 4040  | -10   | -1200 | -470  | O0 |
| ATOM 4138 OD2 ASP B 60   | -57.932 | -3.934  | 6.078 | 1.00  | 43.97 |       | O0 |
| ANISOU 4138 OD2 ASP B 60 | 5720    | 7110    | 3880  | -20   | -910  | -400  | O0 |
| ATOM 4139 H ASP B 60     | -61.487 | -7.412  | 7.446 | 1.00  | 46.91 |       | H0 |
| ANISOU 4139 H ASP B 60   | 5640    | 7700    | 4480  | -570  | -1270 | -770  | H0 |
| ATOM 4140 HA ASP B 60    | -61.625 | -4.801  | 6.491 | 1.00  | 47.69 |       | H0 |
| ANISOU 4140 HA ASP B 60  | 5730    | 7950    | 4440  | -200  | -1330 | -560  | H0 |
| ATOM 4141 HB2 ASP B 60   | -59.537 | -5.134  | 7.604 | 1.00  | 44.29 |       | H0 |
| ANISOU 4141 HB2 ASP B 60 | 5470    | 7230    | 4130  | -230  | -1020 | -530  | H0 |
| ATOM 4142 HB3 ASP B 60   | -59.197 | -6.286  | 6.574 | 1.00  | 45.35 |       | H0 |
| ANISOU 4142 HB3 ASP B 60 | 5770    | 7330    | 4130  | -310  | -1060 | -630  | H0 |
| ATOM 4143 N ARG B 61     | -62.564 | -5.895  | 4.462 | 1.00  | 53.60 |       | N0 |
| ANISOU 4143 N ARG B 61   | 6570    | 8880    | 4920  | -300  | -1620 | -720  | N0 |
| ATOM 4144 CA ARG B 61    | -63.091 | -6.483  | 3.203 | 1.00  | 57.26 |       | C0 |
| ANISOU 4144 CA ARG B 61  | 7110    | 9450    | 5200  | -360  | -1810 | -820  | C0 |
| ATOM 4145 C ARG B 61     | -62.120 | -6.208  | 2.046 | 1.00  | 57.43 |       | C0 |
| ANISOU 4145 C ARG B 61   | 7410    | 9400    | 5010  | -230  | -1760 | -800  | C0 |
| ATOM 4146 O ARG B 61     | -62.254 | -6.883  | 1.014 | 1.00  | 58.76 |       | O0 |
| ANISOU 4146 O ARG B 61   | 7710    | 9600    | 5010  | -280  | -1880 | -900  | O0 |
| ATOM 4147 CB ARG B 61    | -64.486 | -5.926  | 2.908 | 1.00  | 60.89 |       | C0 |
| ANISOU 4147 CB ARG B 61  | 7360    | 10150   | 5630  | -310  | -2010 | -800  | C0 |
| ATOM 4148 CG ARG B 61    | -65.541 | -6.310  | 3.939 | 1.00  | 62.43 |       | C0 |
| ANISOU 4148 CG ARG B 61  | 7260    | 10440   | 6010  | -460  | -2060 | -840  | C0 |
| ATOM 4149 CD ARG B 61    | -65.898 | -7.786  | 3.900 | 1.00  | 64.72 |       | C0 |
| ANISOU 4149 CD ARG B 61  | 7550    | 10720   | 6320  | -730  | -2140 | -990  | C0 |
| ATOM 4150 NE ARG B 61    | -66.398 | -8.201  | 2.591 | 1.00  | 68.23 |       | N0 |
| ANISOU 4150 NE ARG B 61  | 8070    | 11280   | 6570  | -780  | -2360 | -1090 | N0 |
| ATOM 4151 CZ ARG B 61    | -66.551 | -9.464  | 2.185 | 1.00  | 70.34 |       | C0 |
| ANISOU 4151 CZ ARG B 61  | 8440    | 11510   | 6780  | -1010 | -2450 | -1250 | C0 |
| ATOM 4152 NH1 ARG B 61   | -66.243 | -10.476 | 2.983 | 1.00  | 69.65 |       | N0 |
| ANISOU 4152 NH1 ARG B 61 | 8390    | 11250   | 6820  | -1200 | -2340 | -1320 | N0 |
| ATOM 4153 NH2 ARG B 61   | -67.013 | -9.710  | 0.969 | 1.00  | 72.94 |       | N0 |
| ANISOU 4153 NH2 ARG B 61 | 8840    | 11960   | 6910  | -1040 | -2670 | -1330 | N0 |
| ATOM 4154 H ARG B 61     | -63.049 | -5.184  | 4.760 | 1.00  | 53.58 |       | H0 |
| ANISOU 4154 H ARG B 61   | 6440    | 8950    | 4960  | -220  | -1640 | -660  | H0 |
| ATOM 4155 HA ARG B 61    | -63.159 | -7.457  | 3.326 | 1.00  | 57.62 |       | H0 |

|                           |         |         |       |       |       |       |    |
|---------------------------|---------|---------|-------|-------|-------|-------|----|
| ANISOU 4155 HA ARG B 61   | 7180    | 9450    | 5270  | -510  | -1820 | -920  | H0 |
| ATOM 4156 HB2 ARG B 61    | -64.429 | -4.949  | 2.865 | 1.00  | 60.47 |       | H0 |
| ANISOU 4156 HB2 ARG B 61  | 7290    | 10120   | 5560  | -150  | -1990 | -700  | H0 |
| ATOM 4157 HB3 ARG B 61    | -64.770 | -6.248  | 2.028 | 1.00  | 62.44 |       | H0 |
| ANISOU 4157 HB3 ARG B 61  | 7620    | 10420   | 5690  | -340  | -2150 | -870  | H0 |
| ATOM 4158 HG2 ARG B 61    | -65.212 | -6.087  | 4.836 | 1.00  | 60.74 |       | H0 |
| ANISOU 4158 HG2 ARG B 61  | 7010    | 10150   | 5930  | -440  | -1930 | -780  | H0 |
| ATOM 4159 HG3 ARG B 61    | -66.353 | -5.784  | 3.779 | 1.00  | 63.61 |       | H0 |
| ANISOU 4159 HG3 ARG B 61  | 7260    | 10760   | 6150  | -390  | -2180 | -800  | H0 |
| ATOM 4160 HD2 ARG B 61    | -65.104 | -8.315  | 4.125 | 1.00  | 63.46 |       | H0 |
| ANISOU 4160 HD2 ARG B 61  | 7540    | 10390   | 6180  | -780  | -2020 | -1020 | H0 |
| ATOM 4161 HD3 ARG B 61    | -66.583 | -7.970  | 4.579 | 1.00  | 64.94 |       | H0 |
| ANISOU 4161 HD3 ARG B 61  | 7380    | 10820   | 6470  | -820  | -2160 | -1000 | H0 |
| ATOM 4162 HE ARG B 61     | -66.618 | -7.572  | 2.027 | 1.00  | 68.98 |       | H0 |
| ANISOU 4162 HE ARG B 61   | 8160    | 11480   | 6570  | -650  | -2440 | -1050 | H0 |
| ATOM 4163 HH11 ARG B 61   | -65.935 | -10.325 | 3.791 | 1.00  | 67.93 |       | H0 |
| ANISOU 4163 HH11 ARG B 61 | 8120    | 10960   | 6730  | -1170 | -2200 | -1260 | H0 |
| ATOM 4164 HH12 ARG B 61   | -66.348 | -11.302 | 2.701 | 1.00  | 70.64 |       | H0 |
| ANISOU 4164 HH12 ARG B 61 | 8600    | 11340   | 6910  | -1340 | -2400 | -1420 | H0 |
| ATOM 4165 HH21 ARG B 61   | -67.221 | -9.041  | 0.434 | 1.00  | 73.59 |       | H0 |
| ANISOU 4165 HH21 ARG B 61 | 8910    | 12150   | 6900  | -900  | -2750 | -1280 | H0 |
| ATOM 4166 HH22 ARG B 61   | -67.116 | -10.542 | 0.697 | 1.00  | 73.99 |       | H0 |
| ANISOU 4166 HH22 ARG B 61 | 9060    | 12050   | 7000  | -1190 | -2730 | -1440 | H0 |
| ATOM 4167 N THR B 62      | -61.171 | -5.277  | 2.215 | 1.00  | 56.01 |       | N0 |
| ANISOU 4167 N THR B 62    | 7310    | 9120    | 4850  | -70   | -1590 | -670  | N0 |
| ATOM 4168 CA THR B 62     | -60.105 | -4.973  | 1.219 | 1.00  | 56.38 |       | C0 |
| ANISOU 4168 CA THR B 62   | 7610    | 9100    | 4720  | 40    | -1500 | -620  | C0 |
| ATOM 4169 C THR B 62      | -59.153 | -6.170  | 1.098 | 1.00  | 55.55 |       | C0 |
| ANISOU 4169 C THR B 62    | 7670    | 8850    | 4580  | -50   | -1390 | -720  | C0 |
| ATOM 4170 O THR B 62      | -58.545 | -6.320  | 0.020 | 1.00  | 57.12 |       | O0 |
| ANISOU 4170 O THR B 62    | 8090    | 9030    | 4590  | 10    | -1370 | -740  | O0 |
| ATOM 4171 CB THR B 62     | -59.316 | -3.702  | 1.565 | 1.00  | 55.38 |       | C0 |
| ANISOU 4171 CB THR B 62   | 7510    | 8890    | 4640  | 190   | -1340 | -460  | C0 |
| ATOM 4172 OG1 THR B 62    | -58.489 | -3.965  | 2.699 | 1.00  | 53.33 |       | O0 |
| ANISOU 4172 OG1 THR B 62  | 7210    | 8490    | 4560  | 120   | -1160 | -450  | O0 |
| ATOM 4173 CG2 THR B 62    | -60.201 | -2.504  | 1.835 | 1.00  | 56.08 |       | C0 |
| ANISOU 4173 CG2 THR B 62  | 7450    | 9090    | 4770  | 310   | -1420 | -350  | C0 |
| ATOM 4174 H THR B 62      | -61.111 | -4.757  | 2.958 | 1.00  | 54.89 |       | H0 |
| ANISOU 4174 H THR B 62    | 7080    | 8960    | 4820  | -40   | -1520 | -600  | H0 |
| ATOM 4175 HA THR B 62     | -60.542 | -4.837  | 0.347 | 1.00  | 57.94 |       | H0 |
| ANISOU 4175 HA THR B 62   | 7860    | 9390    | 4770  | 90    | -1620 | -630  | H0 |
| ATOM 4176 HB THR B 62     | -58.733 | -3.490  | 0.797 | 1.00  | 55.87 |       | H0 |
| ANISOU 4176 HB THR B 62   | 7730    | 8930    | 4570  | 260   | -1290 | -420  | H0 |
| ATOM 4177 HG21 THR B 62   | -60.905 | -2.461  | 1.163 | 1.00  | 57.57 |       | H0 |
| ANISOU 4177 HG21 THR B 62 | 7630    | 9390    | 4850  | 350   | -1570 | -370  | H0 |
| ATOM 4178 HG22 THR B 62   | -59.667 | -1.690  | 1.796 | 1.00  | 55.51 |       | H0 |
| ANISOU 4178 HG22 THR B 62 | 7450    | 8950    | 4690  | 410   | -1330 | -250  | H0 |
| ATOM 4179 HG23 THR B 62   | -60.601 | -2.585  | 2.719 | 1.00  | 55.23 |       | H0 |
| ANISOU 4179 HG23 THR B 62 | 7190    | 8980    | 4810  | 250   | -1420 | -370  | H0 |
| ATOM 4180 N LEU B 63      | -59.031 | -6.975  | 2.159 | 1.00  | 53.38 |       | N0 |
| ANISOU 4180 N LEU B 63    | 7320    | 8480    | 4480  | -190  | -1320 | -780  | N0 |
| ATOM 4181 CA LEU B 63     | -58.140 | -8.164  | 2.231 | 1.00  | 52.88 |       | C0 |
| ANISOU 4181 CA LEU B 63   | 7410    | 8270    | 4410  | -270  | -1210 | -870  | C0 |
| ATOM 4182 C LEU B 63      | -58.817 | -9.376  | 1.573 | 1.00  | 54.72 |       | C0 |



|                           |         |         |        |      |       |       |    |
|---------------------------|---------|---------|--------|------|-------|-------|----|
| ANISOU 4182 C LEU B 63    | 7730    | 8520    | 4540   | -410 | -1360 | -1040 | C0 |
| ATOM 4183 O LEU B 63      | -58.087 | -10.252 | 1.089  | 1.00 | 55.84 |       | O0 |
| ANISOU 4183 O LEU B 63    | 8090    | 8550    | 4580   | -420 | -1290 | -1120 | O0 |
| ATOM 4184 CB LEU B 63     | -57.810 | -8.463  | 3.698  | 1.00 | 51.08 |       | C0 |
| ANISOU 4184 CB LEU B 63   | 7060    | 7940    | 4420   | -350 | -1080 | -850  | C0 |
| ATOM 4185 CG LEU B 63     | -57.148 | -7.335  | 4.492  | 1.00 | 49.40 |       | C0 |
| ANISOU 4185 CG LEU B 63   | 6750    | 7690    | 4330   | -240 | -940  | -710  | C0 |
| ATOM 4186 CD1 LEU B 63    | -56.949 | -7.746  | 5.942  | 1.00 | 47.92 |       | C0 |
| ANISOU 4186 CD1 LEU B 63  | 6450    | 7410    | 4340   | -330 | -840  | -710  | C0 |
| ATOM 4187 CD2 LEU B 63    | -55.816 | -6.924  | 3.879  | 1.00 | 49.50 |       | C0 |
| ANISOU 4187 CD2 LEU B 63  | 6930    | 7640    | 4240   | -120 | -790  | -630  | C0 |
| ATOM 4188 H LEU B 63      | -59.498 | -6.835  | 2.928  | 1.00 | 52.96 |       | H0 |
| ANISOU 4188 H LEU B 63    | 7110    | 8450    | 4560   | -230 | -1340 | -770  | H0 |
| ATOM 4189 HA LEU B 63     | -57.310 | -7.962  | 1.741  | 1.00 | 52.81 |       | H0 |
| ANISOU 4189 HA LEU B 63   | 7530    | 8220    | 4320   | -180 | -1110 | -830  | H0 |
| ATOM 4190 HB2 LEU B 63    | -58.639 | -8.712  | 4.152  | 1.00 | 51.34 |       | H0 |
| ANISOU 4190 HB2 LEU B 63  | 6970    | 8010    | 4530   | -440 | -1170 | -900  | H0 |
| ATOM 4191 HB3 LEU B 63    | -57.219 | -9.242  | 3.723  | 1.00 | 50.97 |       | H0 |
| ANISOU 4191 HB3 LEU B 63  | 7150    | 7820    | 4390   | -380 | -1000 | -910  | H0 |
| ATOM 4192 HG LEU B 63     | -57.749 | -6.551  | 4.475  | 1.00 | 49.67 |       | H0 |
| ANISOU 4192 HG LEU B 63   | 6690    | 7810    | 4370   | -200 | -1010 | -650  | H0 |
| ATOM 4193 HD11 LEU B 63   | -57.771 | -8.135  | 6.286  | 1.00 | 48.25 |       | H0 |
| ANISOU 4193 HD11 LEU B 63 | 6400    | 7490    | 4440   | -420 | -930  | -760  | H0 |
| ATOM 4194 HD12 LEU B 63   | -56.713 | -6.965  | 6.471  | 1.00 | 46.85 |       | H0 |
| ANISOU 4194 HD12 LEU B 63 | 6240    | 7280    | 4280   | -270 | -780  | -620  | H0 |
| ATOM 4195 HD13 LEU B 63   | -56.233 | -8.403  | 5.997  | 1.00 | 47.58 |       | H0 |
| ANISOU 4195 HD13 LEU B 63 | 6500    | 7280    | 4290   | -350 | -760  | -740  | H0 |
| ATOM 4196 HD21 LEU B 63   | -55.241 | -7.705  | 3.798  | 1.00 | 49.41 |       | H0 |
| ANISOU 4196 HD21 LEU B 63 | 7010    | 7560    | 4200   | -140 | -720  | -690  | H0 |
| ATOM 4197 HD22 LEU B 63   | -55.387 | -6.263  | 4.449  | 1.00 | 48.24 |       | H0 |
| ANISOU 4197 HD22 LEU B 63 | 6710    | 7460    | 4170   | -80  | -700  | -550  | H0 |
| ATOM 4198 HD23 LEU B 63   | -55.967 | -6.540  | 2.998  | 1.00 | 50.44 |       | H0 |
| ANISOU 4198 HD23 LEU B 63 | 7120    | 7820    | 4220   | -60  | -840  | -610  | H0 |
| ATOM 4199 N ALA B 64      | -60.153 | -9.421  | 1.553  | 1.00 | 55.75 |       | N0 |
| ANISOU 4199 N ALA B 64    | 7710    | 8790    | 4680   | -510 | -1560 | -1090 | N0 |
| ATOM 4200 CA ALA B 64     | -60.969 | -10.588 | 1.137  | 1.00 | 58.02 |       | C0 |
| ANISOU 4200 CA ALA B 64   | 8040    | 9100    | 4910   | -700 | -1740 | -1260 | C0 |
| ATOM 4201 C ALA B 64      | -60.532 | -11.106 | -0.243 | 1.00 | 59.92 |       | C0 |
| ANISOU 4201 C ALA B 64    | 8570    | 9310    | 4890   | -660 | -1780 | -1360 | C0 |
| ATOM 4202 O ALA B 64      | -60.227 | -10.278 | -1.126 | 1.00 | 60.71 |       | O0 |
| ANISOU 4202 O ALA B 64    | 8770    | 9480    | 4820   | -480 | -1790 | -1280 | O0 |
| ATOM 4203 CB ALA B 64     | -62.434 | -10.218 | 1.135  | 1.00 | 59.41 |       | C0 |
| ANISOU 4203 CB ALA B 64   | 7970    | 9490    | 5110   | -770 | -1960 | -1270 | C0 |
| ATOM 4204 H ALA B 64      | -60.671 | -8.718  | 1.807  | 1.00 | 55.68 |       | H0 |
| ANISOU 4204 H ALA B 64    | 7550    | 8880    | 4730   | -470 | -1610 | -1030 | H0 |
| ATOM 4205 HA ALA B 64     | -60.829 | -11.307 | 1.795  | 1.00 | 57.40 |       | H0 |
| ANISOU 4205 HA ALA B 64   | 7960    | 8920    | 4930   | -810 | -1670 | -1310 | H0 |
| ATOM 4206 HB1 ALA B 64    | -62.965 | -10.992 | 0.881  | 1.00 | 60.95 |       | H0 |
| ANISOU 4206 HB1 ALA B 64  | 8180    | 9710    | 5270   | -920 | -2070 | -1380 | H0 |
| ATOM 4207 HB2 ALA B 64    | -62.697 | -9.924  | 2.024  | 1.00 | 58.36 |       | H0 |
| ANISOU 4207 HB2 ALA B 64  | 7660    | 9380    | 5140   | -790 | -1910 | -1210 | H0 |
| ATOM 4208 HB3 ALA B 64    | -62.587 | -9.499  | 0.499  | 1.00 | 60.08 |       | H0 |
| ANISOU 4208 HB3 ALA B 64  | 8060    | 9680    | 5090   | -650 | -2020 | -1210 | H0 |
| ATOM 4209 N TRP B 65      | -60.517 | -12.433 | -0.416 | 1.00 | 60.65 |       | N0 |

|                          |         |         |        |       |       |       |    |
|--------------------------|---------|---------|--------|-------|-------|-------|----|
| ANISOU 4209 N TRP B 65   | 8830    | 9280    | 4930   | -810  | -1810 | -1510 | N0 |
| ATOM 4210 CA TRP B 65    | -60.242 | -13.118 | -1.708 | 1.00  | 63.03 |       | C0 |
| ANISOU 4210 CA TRP B 65  | 9440    | 9540    | 4970   | -800  | -1880 | -1640 | C0 |
| ATOM 4211 C TRP B 65     | -61.133 | -14.361 | -1.836 | 1.00  | 66.07 |       | C0 |
| ANISOU 4211 C TRP B 65   | 9880    | 9890    | 5330   | -1060 | -2060 | -1830 | C0 |
| ATOM 4212 O TRP B 65     | -61.761 | -14.756 | -0.830 | 1.00  | 65.24 |       | O0 |
| ANISOU 4212 O TRP B 65   | 9580    | 9770    | 5440   | -1240 | -2080 | -1850 | O0 |
| ATOM 4213 CB TRP B 65    | -58.749 | -13.462 | -1.843 | 1.00  | 61.24 |       | C0 |
| ANISOU 4213 CB TRP B 65  | 9460    | 9120    | 4680   | -660  | -1630 | -1630 | C0 |
| ATOM 4214 CG TRP B 65    | -58.281 | -14.576 | -0.957 | 1.00  | 60.06 |       | C0 |
| ANISOU 4214 CG TRP B 65  | 9380    | 8770    | 4670   | -770  | -1500 | -1690 | C0 |
| ATOM 4215 CD1 TRP B 65   | -58.172 | -15.898 | -1.283 | 1.00  | 61.54 |       | C0 |
| ANISOU 4215 CD1 TRP B 65 | 9820    | 8800    | 4770   | -880  | -1510 | -1860 | C0 |
| ATOM 4216 CD2 TRP B 65   | -57.860 | -14.469 | 0.414  | 1.00  | 56.96 |       | C0 |
| ANISOU 4216 CD2 TRP B 65 | 8820    | 8300    | 4530   | -780  | -1340 | -1600 | C0 |
| ATOM 4217 NE1 TRP B 65   | -57.716 | -16.617 | -0.211 | 1.00  | 60.05 |       | N0 |
| ANISOU 4217 NE1 TRP B 65 | 9630    | 8430    | 4750   | -940  | -1370 | -1860 | N0 |
| ATOM 4218 CE2 TRP B 65   | -57.506 | -15.767 | 0.842  | 1.00  | 57.22 |       | C0 |
| ANISOU 4218 CE2 TRP B 65 | 9010    | 8130    | 4600   | -880  | -1260 | -1700 | C0 |
| ATOM 4219 CE3 TRP B 65   | -57.737 | -13.406 | 1.317  | 1.00  | 54.42 |       | C0 |
| ANISOU 4219 CE3 TRP B 65 | 8250    | 8050    | 4380   | -710  | -1250 | -1440 | C0 |
| ATOM 4220 CZ2 TRP B 65   | -57.047 | -16.026 | 2.134  | 1.00  | 55.37 |       | C0 |
| ANISOU 4220 CZ2 TRP B 65 | 8680    | 7780    | 4580   | -900  | -1100 | -1640 | C0 |
| ATOM 4221 CZ3 TRP B 65   | -57.281 | -13.662 | 2.592  | 1.00  | 52.31 |       | C0 |
| ANISOU 4221 CZ3 TRP B 65 | 7890    | 7670    | 4320   | -740  | -1100 | -1390 | C0 |
| ATOM 4222 CH2 TRP B 65   | -56.943 | -14.955 | 2.994  | 1.00  | 52.69 |       | C0 |
| ANISOU 4222 CH2 TRP B 65 | 8090    | 7530    | 4400   | -830  | -1030 | -1490 | C0 |
| ATOM 4223 H TRP B 65     | -60.675 | -13.016 | 0.266  | 1.00  | 60.45 |       | H0 |
| ANISOU 4223 H TRP B 65   | 8750    | 9190    | 5030   | -940  | -1790 | -1560 | H0 |
| ATOM 4224 HA TRP B 65    | -60.472 | -12.493 | -2.435 | 1.00  | 63.86 |       | H0 |
| ANISOU 4224 HA TRP B 65  | 9550    | 9770    | 4950   | -710  | -1960 | -1610 | H0 |
| ATOM 4225 HB2 TRP B 65   | -58.575 | -13.703 | -2.776 | 1.00  | 62.84 |       | H0 |
| ANISOU 4225 HB2 TRP B 65 | 9870    | 9320    | 4690   | -620  | -1660 | -1690 | H0 |
| ATOM 4226 HB3 TRP B 65   | -58.231 | -12.657 | -1.642 | 1.00  | 59.89 |       | H0 |
| ANISOU 4226 HB3 TRP B 65 | 9230    | 8980    | 4550   | -530  | -1520 | -1500 | H0 |
| ATOM 4227 HD1 TRP B 65   | -58.386 | -16.270 | -2.124 | 1.00  | 63.37 |       | H0 |
| ANISOU 4227 HD1 TRP B 65 | 10220   | 9030    | 4830   | -900  | -1610 | -1960 | H0 |
| ATOM 4228 HE1 TRP B 65   | -57.570 | -17.481 | -0.207 | 1.00  | 60.84 |       | H0 |
| ANISOU 4228 HE1 TRP B 65 | 9890    | 8400    | 4830   | -1000 | -1340 | -1950 | H0 |
| ATOM 4229 HE3 TRP B 65   | -57.963 | -12.532 | 1.054  | 1.00  | 54.34 |       | H0 |
| ANISOU 4229 HE3 TRP B 65 | 8150    | 8150    | 4350   | -630  | -1300 | -1360 | H0 |
| ATOM 4230 HZ2 TRP B 65   | -56.820 | -16.899 | 2.405  | 1.00  | 55.64 |       | H0 |
| ANISOU 4230 HZ2 TRP B 65 | 8840    | 7670    | 4630   | -950  | -1050 | -1710 | H0 |
| ATOM 4231 HZ3 TRP B 65   | -57.198 | -12.950 | 3.206  | 1.00  | 50.99 |       | H0 |
| ANISOU 4231 HZ3 TRP B 65 | 7570    | 7540    | 4260   | -690  | -1050 | -1290 | H0 |
| ATOM 4232 HH2 TRP B 65   | -56.636 | -15.099 | 3.872  | 1.00  | 51.62 |       | H0 |
| ANISOU 4232 HH2 TRP B 65 | 7890    | 7330    | 4400   | -840  | -940  | -1450 | H0 |
| ATOM 4233 N ASN B 66     | -61.182 | -14.939 | -3.038 | 1.00  | 69.73 |       | N0 |
| ANISOU 4233 N ASN B 66   | 10600   | 10340   | 5550   | -1080 | -2180 | -1970 | N0 |
| ATOM 4234 CA ASN B 66    | -61.961 | -16.159 | -3.375 | 1.00  | 73.59 |       | C0 |
| ANISOU 4234 CA ASN B 66  | 11210   | 10790   | 5970   | -1330 | -2370 | -2170 | C0 |
| ATOM 4235 C ASN B 66     | -61.099 | -17.388 | -3.064 | 1.00  | 73.76 |       | C0 |
| ANISOU 4235 C ASN B 66   | 11510   | 10510   | 6000   | -1390 | -2200 | -2270 | C0 |
| ATOM 4236 O ASN B 66     | -60.068 | -17.558 | -3.745 | 1.00  | 74.23 |       | O0 |

|                          |         |         |        |       |       |       |    |
|--------------------------|---------|---------|--------|-------|-------|-------|----|
| ANISOU 4236 O ASN B 66   | 11860   | 10460   | 5890   | -1210 | -2060 | -2290 | O0 |
| ATOM 4237 CB ASN B 66    | -62.398 | -16.125 | -4.841 | 1.00  | 77.36 |       | C0 |
| ANISOU 4237 CB ASN B 66  | 11860   | 11390   | 6140   | -1310 | -2590 | -2270 | C0 |
| ATOM 4238 CG ASN B 66    | -63.325 | -17.256 | -5.231 | 1.00  | 81.30 |       | C0 |
| ANISOU 4238 CG ASN B 66  | 12450   | 11870   | 6570   | -1600 | -2830 | -2490 | C0 |
| ATOM 4239 OD1 ASN B 66   | -63.321 | -18.323 | -4.618 | 1.00  | 80.92 |       | O0 |
| ANISOU 4239 OD1 ASN B 66 | 12480   | 11630   | 6630   | -1800 | -2780 | -2590 | O0 |
| ATOM 4240 ND2 ASN B 66   | -64.119 | -17.021 | -6.263 | 1.00  | 85.80 |       | N0 |
| ANISOU 4240 ND2 ASN B 66 | 13030   | 12640   | 6930   | -1630 | -3100 | -2560 | N0 |
| ATOM 4241 H ASN B 66     | -60.719 | -14.605 | -3.749 | 1.00  | 70.04 |       | H0 |
| ANISOU 4241 H ASN B 66   | 10780   | 10400   | 5430   | -930  | -2150 | -1940 | H0 |
| ATOM 4242 HA ASN B 66    | -62.771 | -16.182 | -2.813 | 1.00  | 73.71 |       | H0 |
| ANISOU 4242 HA ASN B 66  | 11000   | 10880   | 6120   | -1490 | -2470 | -2170 | H0 |
| ATOM 4243 HB2 ASN B 66   | -62.849 | -15.274 | -5.014 | 1.00  | 77.35 |       | H0 |
| ANISOU 4243 HB2 ASN B 66 | 11690   | 11570   | 6130   | -1240 | -2680 | -2190 | H0 |
| ATOM 4244 HB3 ASN B 66   | -61.601 | -16.162 | -5.407 | 1.00  | 77.42 |       | H0 |
| ANISOU 4244 HB3 ASN B 66 | 12100   | 11320   | 6000   | -1160 | -2490 | -2280 | H0 |
| ATOM 4245 N SER B 67     | -61.510 | -18.207 | -2.086 | 1.00  | 73.92 |       | N0 |
| ANISOU 4245 N SER B 67   | 11440   | 10420   | 6220   | -1620 | -2190 | -2330 | N0 |
| ATOM 4246 CA SER B 67    | -60.754 | -19.389 | -1.587 | 1.00  | 74.37 |       | C0 |
| ANISOU 4246 CA SER B 67  | 11750   | 10180   | 6330   | -1670 | -2020 | -2400 | C0 |
| ATOM 4247 C SER B 67     | -61.495 | -20.692 | -1.926 | 1.00  | 78.65 |       | C0 |
| ANISOU 4247 C SER B 67   | 12490   | 10600   | 6800   | -1960 | -2190 | -2620 | C0 |
| ATOM 4248 O SER B 67     | -61.723 | -21.506 | -1.005 | 1.00  | 79.52 |       | O0 |
| ANISOU 4248 O SER B 67   | 12580   | 10560   | 7080   | -2160 | -2140 | -2650 | O0 |
| ATOM 4249 CB SER B 67    | -60.471 | -19.268 | -0.102 | 1.00  | 71.05 |       | C0 |
| ANISOU 4249 CB SER B 67  | 11110   | 9690    | 6190   | -1680 | -1830 | -2270 | C0 |
| ATOM 4250 OG SER B 67    | -61.672 | -19.190 | 0.648  | 1.00  | 70.62 |       | O0 |
| ANISOU 4250 OG SER B 67  | 10760   | 9760    | 6320   | -1900 | -1970 | -2260 | O0 |
| ATOM 4251 H SER B 67     | -62.300 | -18.096 | -1.647 | 1.00  | 74.15 |       | H0 |
| ANISOU 4251 H SER B 67   | 11260   | 10550   | 6370   | -1750 | -2290 | -2320 | H0 |
| ATOM 4252 HA SER B 67    | -59.880 | -19.409 | -2.061 | 1.00  | 74.15 |       | H0 |
| ANISOU 4252 HA SER B 67  | 11920   | 10080   | 6170   | -1500 | -1900 | -2400 | H0 |
| ATOM 4253 HB2 SER B 67   | -59.949 | -20.047 | 0.195  | 1.00  | 71.03 |       | H0 |
| ANISOU 4253 HB2 SER B 67 | 11290   | 9500    | 6200   | -1690 | -1720 | -2320 | H0 |
| ATOM 4254 HB3 SER B 67   | -59.933 | -18.461 | 0.061  | 1.00  | 69.20 |       | H0 |
| ANISOU 4254 HB3 SER B 67 | 10780   | 9520    | 5980   | -1490 | -1730 | -2150 | H0 |
| ATOM 4255 N SER B 68     | -61.845 | -20.883 | -3.202 | 1.00  | 82.04 |       | N0 |
| ANISOU 4255 N SER B 68   | 13110   | 11090   | 6970   | -1990 | -2380 | -2750 | N0 |
| ATOM 4256 CA SER B 68    | -62.397 | -22.148 | -3.758 | 1.00  | 86.47 |       | C0 |
| ANISOU 4256 CA SER B 68  | 13950   | 11510   | 7400   | -2250 | -2550 | -2980 | C0 |
| ATOM 4257 C SER B 68     | -61.251 | -23.137 | -3.992 | 1.00  | 87.47 |       | C0 |
| ANISOU 4257 C SER B 68   | 14520   | 11310   | 7400   | -2140 | -2350 | -3070 | C0 |
| ATOM 4258 O SER B 68     | -61.322 | -24.264 | -3.463 | 1.00  | 89.00 |       | O0 |
| ANISOU 4258 O SER B 68   | 14880   | 11260   | 7680   | -2330 | -2320 | -3180 | O0 |
| ATOM 4259 CB SER B 68    | -63.176 | -21.910 | -5.032 | 1.00  | 89.26 |       | C0 |
| ANISOU 4259 CB SER B 68  | 14340   | 12060   | 7510   | -2310 | -2840 | -3090 | C0 |
| ATOM 4260 OG SER B 68    | -64.510 | -21.514 | -4.750 | 1.00  | 90.12 |       | O0 |
| ANISOU 4260 OG SER B 68  | 14070   | 12420   | 7750   | -2530 | -3080 | -3070 | O0 |
| ATOM 4261 H SER B 68     | -61.761 | -20.236 | -3.838 | 1.00  | 82.17 |       | H0 |
| ANISOU 4261 H SER B 68   | 13120   | 11240   | 6860   | -1850 | -2420 | -2710 | H0 |
| ATOM 4262 HA SER B 68    | -63.013 | -22.539 | -3.081 | 1.00  | 86.65 |       | H0 |
| ANISOU 4262 HA SER B 68  | 13830   | 11500   | 7580   | -2470 | -2600 | -3000 | H0 |
| ATOM 4263 HB2 SER B 68   | -62.731 | -21.210 | -5.562 | 1.00  | 88.60 |       | H0 |

|             |              |         |         |        |       |        |       |    |
|-------------|--------------|---------|---------|--------|-------|--------|-------|----|
| ANISOU 4263 | HB2 SER B 68 | 14280   | 12070   | 7310   | -2080 | -2800  | -3020 | H0 |
| ATOM 4264   | HB3 SER B 68 | -63.187 | -22.736 | -5.567 | 1.00  | 91.54  |       | H0 |
| ANISOU 4264 | HB3 SER B 68 | 14910   | 12210   | 7660   | -2410 | -2910  | -3250 | H0 |
| ATOM 4265   | N HIS B 69   | -60.240 | -22.713 | -4.758 | 1.00  | 87.43  |       | N0 |
| ANISOU 4265 | N HIS B 69   | 14710   | 11310   | 7200   | -1830 | -2220  | -3030 | N0 |
| ATOM 4266   | CA HIS B 69  | -59.023 | -23.497 | -5.108 | 1.00  | 88.36  |       | C0 |
| ANISOU 4266 | CA HIS B 69  | 15250   | 11160   | 7170   | -1640 | -2010  | -3100 | C0 |
| ATOM 4267   | C HIS B 69   | -57.795 | -22.875 | -4.433 | 1.00  | 84.96  |       | C0 |
| ANISOU 4267 | C HIS B 69   | 14700   | 10720   | 6860   | -1340 | -1700  | -2900 | C0 |
| ATOM 4268   | O HIS B 69   | -56.674 | -23.065 | -4.955 | 1.00  | 85.53  |       | O0 |
| ANISOU 4268 | O HIS B 69   | 15040   | 10690   | 6770   | -1090 | -1510  | -2900 | O0 |
| ATOM 4269   | CB HIS B 69  | -58.860 | -23.568 | -6.634 | 1.00  | 91.55  |       | C0 |
| ANISOU 4269 | CB HIS B 69  | 15980   | 11590   | 7210   | -1520 | -2100  | -3230 | C0 |
| ATOM 4270   | CG HIS B 69  | -60.057 | -24.107 | -7.340 | 1.00  | 95.30  |       | C0 |
| ANISOU 4270 | CG HIS B 69  | 16560   | 12100   | 7540   | -1810 | -2430  | -3430 | C0 |
| ATOM 4271   | ND1 HIS B 69 | -61.192 | -23.347 | -7.551 | 1.00  | 96.10  |       | N0 |
| ANISOU 4271 | ND1 HIS B 69 | 16350   | 12500   | 7670   | -1950 | -2690  | -3400 | N0 |
| ATOM 4272   | CD2 HIS B 69 | -60.302 | -25.319 | -7.884 | 1.00  | 99.10  |       | C0 |
| ANISOU 4272 | CD2 HIS B 69 | 17420   | 12370   | 7860   | -1980 | -2540  | -3660 | C0 |
| ATOM 4273   | CE1 HIS B 69 | -62.087 | -24.069 | -8.197 | 1.00  | 99.91  |       | C0 |
| ANISOU 4273 | CE1 HIS B 69 | 16990   | 12970   | 8000   | -2210 | -2970  | -3610 | C0 |
| ATOM 4274   | NE2 HIS B 69 | -61.563 | -25.284 | -8.415 | 1.00  | 101.72 |       | N0 |
| ANISOU 4274 | NE2 HIS B 69 | 17660   | 12880   | 8110   | -2250 | -2880  | -3780 | N0 |
| ATOM 4275   | H HIS B 69   | -60.228 | -21.883 | -5.133 | 1.00  | 86.80  |       | H0 |
| ANISOU 4275 | H HIS B 69   | 14520   | 11400   | 7060   | -1700 | -2250  | -2950 | H0 |
| ATOM 4276   | HA HIS B 69  | -59.136 | -24.413 | -4.761 | 1.00  | 89.36  |       | H0 |
| ANISOU 4276 | HA HIS B 69  | 15520   | 11100   | 7340   | -1790 | -2000  | -3200 | H0 |
| ATOM 4277   | HB2 HIS B 69 | -58.670 | -22.665 | -6.975 | 1.00  | 90.51  |       | H0 |
| ANISOU 4277 | HB2 HIS B 69 | 15730   | 11640   | 7030   | -1350 | -2090  | -3120 | H0 |
| ATOM 4278   | HB3 HIS B 69 | -58.087 | -24.136 | -6.845 | 1.00  | 92.03  |       | H0 |
| ANISOU 4278 | HB3 HIS B 69 | 16320   | 11480   | 7170   | -1390 | -1960  | -3280 | H0 |
| ATOM 4279   | HD2 HIS B 69 | -59.716 | -26.053 | -7.900 | 1.00  | 99.68  |       | H0 |
| ANISOU 4279 | HD2 HIS B 69 | 17780   | 12220   | 7870   | -1930 | -2420  | -3730 | H0 |
| ATOM 4280   | HE1 HIS B 69 | -62.944 | -23.780 | -8.459 | 1.00  | 101.03 |       | H0 |
| ANISOU 4280 | HE1 HIS B 69 | 16970   | 13290   | 8130   | -2350 | -3180  | -3640 | H0 |
| ATOM 4281   | N SER B 70   | -58.003 | -22.176 | -3.311 | 1.00  | 81.31  |       | N0 |
| ANISOU 4281 | N SER B 70   | 13850   | 10370   | 6670   | -1380 | -1660  | -2730 | N0 |
| ATOM 4282   | CA SER B 70  | -56.965 | -21.410 | -2.573 | 1.00  | 77.86  |       | C0 |
| ANISOU 4282 | CA SER B 70  | 13240   | 9960    | 6380   | -1140 | -1400  | -2530 | C0 |
| ATOM 4283   | C SER B 70   | -57.085 | -21.697 | -1.076 | 1.00  | 74.58  |       | C0 |
| ANISOU 4283 | C SER B 70   | 12620   | 9450    | 6260   | -1260 | -1320  | -2460 | C0 |
| ATOM 4284   | O SER B 70   | -58.135 | -22.140 | -0.613 | 1.00  | 75.86  |       | O0 |
| ANISOU 4284 | O SER B 70   | 12690   | 9600    | 6540   | -1540 | -1470  | -2530 | O0 |
| ATOM 4285   | CB SER B 70  | -57.088 | -19.935 | -2.874 | 1.00  | 76.91  |       | C0 |
| ANISOU 4285 | CB SER B 70  | 12850   | 10120   | 6250   | -1010 | -1450  | -2380 | C0 |
| ATOM 4286   | OG SER B 70  | -55.813 | -19.347 | -3.081 | 1.00  | 76.24  |       | O0 |
| ANISOU 4286 | OG SER B 70  | 12810   | 10040   | 6110   | -720  | -1220  | -2250 | O0 |
| ATOM 4287   | H SER B 70   | -58.815 | -22.126 | -2.903 | 1.00  | 81.50  |       | H0 |
| ANISOU 4287 | H SER B 70   | 13690   | 10460   | 6810   | -1560 | -1780  | -2740 | H0 |
| ATOM 4288   | HA SER B 70  | -56.075 | -21.723 | -2.883 | 1.00  | 77.94  |       | H0 |
| ANISOU 4288 | HA SER B 70  | 13460   | 9860    | 6290   | -970  | -1260  | -2540 | H0 |
| ATOM 4289   | HB2 SER B 70 | -57.640 | -19.811 | -3.679 | 1.00  | 78.62  |       | H0 |
| ANISOU 4289 | HB2 SER B 70 | 13120   | 10430   | 6320   | -1050 | -1610  | -2450 | H0 |
| ATOM 4290   | HB3 SER B 70 | -57.537 | -19.484 | -2.124 | 1.00  | 75.56  |       | H0 |

|                           |         |         |        |       |       |       |    |
|---------------------------|---------|---------|--------|-------|-------|-------|----|
| ANISOU 4290 HB3 SER B 70  | 12420   | 10030   | 6260   | -1090 | -1480 | -2300 | H0 |
| ATOM 4291 N PROB B 71     | -56.009 | -21.499 | -0.280 | 1.00  | 70.80 |       | N0 |
| ANISOU 4291 N PROB B 71   | 12080   | 8910    | 5910   | -1070 | -1080 | -2330 | N0 |
| ATOM 4292 CA PROB B 71    | -56.096 | -21.621 | 1.178  | 1.00  | 68.14 |       | C0 |
| ANISOU 4292 CA PROB B 71  | 11540   | 8510    | 5840   | -1170 | -1000 | -2240 | C0 |
| ATOM 4293 C PROB B 71     | -57.051 | -20.584 | 1.790  | 1.00  | 65.26 |       | C0 |
| ANISOU 4293 C PROB B 71   | 10780   | 8370    | 5650   | -1290 | -1120 | -2130 | C0 |
| ATOM 4294 O PROB B 71     | -57.079 | -19.466 | 1.311  | 1.00  | 64.52 |       | O0 |
| ANISOU 4294 O PROB B 71   | 10530   | 8480    | 5500   | -1170 | -1160 | -2050 | O0 |
| ATOM 4295 CB PROB B 71    | -54.656 | -21.394 | 1.664  | 1.00  | 66.33 |       | C0 |
| ANISOU 4295 CB PROB B 71  | 11320   | 8220    | 5660   | -890  | -740  | -2110 | C0 |
| ATOM 4296 CG PROB B 71    | -53.800 | -21.670 | 0.443  | 1.00  | 68.13 |       | C0 |
| ANISOU 4296 CG PROB B 71  | 11850   | 8400    | 5630   | -690  | -660  | -2170 | C0 |
| ATOM 4297 CD PROB B 71    | -54.639 | -21.212 | -0.732 | 1.00  | 70.04 |       | C0 |
| ANISOU 4297 CD PROB B 71  | 12120   | 8800    | 5700   | -760  | -870  | -2250 | C0 |
| ATOM 4298 HA PROB B 71    | -56.386 | -22.537 | 1.416  | 1.00  | 69.26 |       | H0 |
| ANISOU 4298 HA PROB B 71  | 11820   | 8500    | 6000   | -1310 | -1030 | -2330 | H0 |
| ATOM 4299 HB2 PROB B 71   | -54.530 | -20.472 | 1.976  | 1.00  | 64.58 |       | H0 |
| ANISOU 4299 HB2 PROB B 71 | 10870   | 8140    | 5520   | -830  | -710  | -1990 | H0 |
| ATOM 4300 HB3 PROB B 71   | -54.431 | -22.009 | 2.394  | 1.00  | 66.05 |       | H0 |
| ANISOU 4300 HB3 PROB B 71 | 11330   | 8050    | 5720   | -920  | -660  | -2110 | H0 |
| ATOM 4301 HG2 PROB B 71   | -52.961 | -21.167 | 0.486  | 1.00  | 66.97 |       | H0 |
| ANISOU 4301 HG2 PROB B 71 | 11650   | 8310    | 5490   | -500  | -520  | -2070 | H0 |
| ATOM 4302 HG3 PROB B 71   | -53.594 | -22.624 | 0.371  | 1.00  | 69.51 |       | H0 |
| ANISOU 4302 HG3 PROB B 71 | 12270   | 8390    | 5750   | -700  | -620  | -2270 | H0 |
| ATOM 4303 HD2 PROB B 71   | -54.518 | -20.261 | -0.905 | 1.00  | 68.90 |       | H0 |
| ANISOU 4303 HD2 PROB B 71 | 11820   | 8810    | 5550   | -670  | -860  | -2150 | H0 |
| ATOM 4304 HD3 PROB B 71   | -54.418 | -21.716 | -1.537 | 1.00  | 71.80 |       | H0 |
| ANISOU 4304 HD3 PROB B 71 | 12600   | 8950    | 5740   | -710  | -870  | -2350 | H0 |
| ATOM 4305 N ASP B 72      | -57.801 | -20.989 | 2.821  | 1.00  | 63.87 |       | N0 |
| ANISOU 4305 N ASP B 72    | 10460   | 8150    | 5660   | -1510 | -1160 | -2140 | N0 |
| ATOM 4306 CA ASP B 72     | -58.842 | -20.172 | 3.506  | 1.00  | 61.81 |       | C0 |
| ANISOU 4306 CA ASP B 72   | 9820    | 8090    | 5580   | -1640 | -1270 | -2050 | C0 |
| ATOM 4307 C ASP B 72      | -58.198 | -19.040 | 4.313  | 1.00  | 56.85 |       | C0 |
| ANISOU 4307 C ASP B 72    | 8950    | 7560    | 5080   | -1440 | -1120 | -1860 | C0 |
| ATOM 4308 O ASP B 72      | -58.868 | -18.015 | 4.516  | 1.00  | 55.31 |       | O0 |
| ANISOU 4308 O ASP B 72    | 8480    | 7570    | 4970   | -1450 | -1200 | -1780 | O0 |
| ATOM 4309 CB ASP B 72     | -59.696 | -21.021 | 4.454  | 1.00  | 63.53 |       | C0 |
| ANISOU 4309 CB ASP B 72   | 9970    | 8210    | 5960   | -1920 | -1310 | -2100 | C0 |
| ATOM 4310 CG ASP B 72     | -60.951 | -21.599 | 3.827  | 1.00  | 67.47 |       | C0 |
| ANISOU 4310 CG ASP B 72   | 10490   | 8750    | 6390   | -2210 | -1550 | -2250 | C0 |
| ATOM 4311 OD1 ASP B 72    | -60.823 | -22.408 | 2.885  | 1.00  | 70.15 |       | O0 |
| ANISOU 4311 OD1 ASP B 72  | 11140   | 8960    | 6550   | -2250 | -1610 | -2400 | O0 |
| ATOM 4312 OD2 ASP B 72    | -62.051 | -21.241 | 4.298  | 1.00  | 69.03 |       | O0 |
| ANISOU 4312 OD2 ASP B 72  | 10390   | 9120    | 6720   | -2380 | -1670 | -2220 | O0 |
| ATOM 4313 H ASP B 72      | -57.711 | -21.822 | 3.177  | 1.00  | 64.51 |       | H0 |
| ANISOU 4313 H ASP B 72    | 10670   | 8060    | 5780   | -1580 | -1120 | -2190 | H0 |
| ATOM 4314 HA ASP B 72     | -59.430 | -19.777 | 2.819  | 1.00  | 62.79 |       | H0 |
| ANISOU 4314 HA ASP B 72   | 9890    | 8360    | 5620   | -1680 | -1420 | -2080 | H0 |
| ATOM 4315 HB2 ASP B 72    | -59.156 | -21.762 | 4.795  | 1.00  | 63.58 |       | H0 |
| ANISOU 4315 HB2 ASP B 72  | 10150   | 8030    | 5980   | -1910 | -1200 | -2120 | H0 |
| ATOM 4316 HB3 ASP B 72    | -59.966 | -20.469 | 5.216  | 1.00  | 62.16 |       | H0 |
| ANISOU 4316 HB3 ASP B 72  | 9560    | 8130    | 5930   | -1930 | -1290 | -2000 | H0 |
| ATOM 4317 N GLN B 73      | -56.972 | -19.240 | 4.803  | 1.00  | 54.16 |       | N0 |

|                           |         |         |        |       |       |       |    |
|---------------------------|---------|---------|--------|-------|-------|-------|----|
| ANISOU 4317 N GLN B 73    | 8720    | 7080    | 4780   | -1270 | -910  | -1800 | NO |
| ATOM 4318 CA GLN B 73     | -56.311 | -18.324 | 5.772  | 1.00  | 50.77 |       | CO |
| ANISOU 4318 CA GLN B 73   | 8080    | 6720    | 4500   | -1120 | -770  | -1630 | CO |
| ATOM 4319 C GLN B 73      | -54.829 | -18.167 | 5.428  | 1.00  | 48.91 |       | CO |
| ANISOU 4319 C GLN B 73    | 7980    | 6430    | 4180   | -870  | -590  | -1570 | CO |
| ATOM 4320 O GLN B 73      | -54.234 | -19.127 | 4.905  | 1.00  | 50.06 |       | OO |
| ANISOU 4320 O GLN B 73    | 8410    | 6420    | 4200   | -810  | -530  | -1660 | OO |
| ATOM 4321 CB GLN B 73     | -56.418 | -18.860 | 7.202  | 1.00  | 49.87 |       | CO |
| ANISOU 4321 CB GLN B 73   | 7880    | 6490    | 4580   | -1230 | -690  | -1590 | CO |
| ATOM 4322 CG GLN B 73     | -57.842 | -19.082 | 7.691  | 1.00  | 50.87 |       | CO |
| ANISOU 4322 CG GLN B 73   | 7850    | 6670    | 4810   | -1490 | -830  | -1630 | CO |
| ATOM 4323 CD GLN B 73     | -57.885 | -19.432 | 9.162  | 1.00  | 49.72 |       | CO |
| ANISOU 4323 CD GLN B 73   | 7610    | 6430    | 4850   | -1570 | -720  | -1570 | CO |
| ATOM 4324 OE1 GLN B 73    | -56.960 | -19.143 | 9.922  | 1.00  | 47.75 |       | OO |
| ANISOU 4324 OE1 GLN B 73  | 7330    | 6140    | 4670   | -1410 | -570  | -1460 | OO |
| ATOM 4325 NE2 GLN B 73    | -58.972 | -20.060 | 9.578  | 1.00  | 50.94 |       | NO |
| ANISOU 4325 NE2 GLN B 73  | 7710    | 6560    | 5090   | -1820 | -800  | -1620 | NO |
| ATOM 4326 H GLN B 73      | -56.464 | -19.961 | 4.578  | 1.00  | 55.09 |       | HO |
| ANISOU 4326 H GLN B 73    | 9050    | 7060    | 4820   | -1240 | -850  | -1860 | HO |
| ATOM 4327 HA GLN B 73     | -56.746 | -17.445 | 5.723  | 1.00  | 50.08 |       | HO |
| ANISOU 4327 HA GLN B 73   | 7810    | 6780    | 4440   | -1120 | -830  | -1570 | HO |
| ATOM 4328 HB2 GLN B 73    | -55.932 | -19.708 | 7.249  | 1.00  | 50.50 |       | HO |
| ANISOU 4328 HB2 GLN B 73  | 8150    | 6410    | 4630   | -1210 | -610  | -1640 | HO |
| ATOM 4329 HB3 GLN B 73    | -55.971 | -18.226 | 7.800  | 1.00  | 48.19 |       | HO |
| ANISOU 4329 HB3 GLN B 73  | 7540    | 6320    | 4450   | -1130 | -600  | -1490 | HO |
| ATOM 4330 HG2 GLN B 73    | -58.368 | -18.269 | 7.538  | 1.00  | 50.49 |       | HO |
| ANISOU 4330 HG2 GLN B 73  | 7620    | 6790    | 4780   | -1490 | -910  | -1590 | HO |
| ATOM 4331 HG3 GLN B 73    | -58.252 | -19.809 | 7.175  | 1.00  | 52.64 |       | HO |
| ANISOU 4331 HG3 GLN B 73  | 8210    | 6820    | 4960   | -1620 | -910  | -1740 | HO |
| ATOM 4332 HE21 GLN B 73   | -58.985 | -20.440 | 10.376 | 1.00  | 50.72 |       | HO |
| ANISOU 4332 HE21 GLN B 73 | 7670    | 6450    | 5150   | -1870 | -740  | -1590 | HO |
| ATOM 4333 HE22 GLN B 73   | -59.687 | -20.100 | 9.059  | 1.00  | 52.27 |       | HO |
| ANISOU 4333 HE22 GLN B 73 | 7850    | 6800    | 5220   | -1940 | -930  | -1680 | HO |
| ATOM 4334 N VAL B 74      | -54.256 | -17.007 | 5.751  | 1.00  | 46.06 |       | NO |
| ANISOU 4334 N VAL B 74    | 7430    | 6190    | 3880   | -720  | -510  | -1420 | NO |
| ATOM 4335 CA VAL B 74     | -52.789 | -16.751 | 5.651  | 1.00  | 44.93 |       | CO |
| ANISOU 4335 CA VAL B 74   | 7350    | 6020    | 3700   | -500  | -320  | -1340 | CO |
| ATOM 4336 C VAL B 74      | -52.334 | -15.993 | 6.897  | 1.00  | 41.84 |       | CO |
| ANISOU 4336 C VAL B 74    | 6730    | 5670    | 3500   | -450  | -230  | -1200 | CO |
| ATOM 4337 O VAL B 74      | -53.136 | -15.236 | 7.469  | 1.00  | 40.60 |       | OO |
| ANISOU 4337 O VAL B 74    | 6360    | 5620    | 3450   | -540  | -310  | -1150 | OO |
| ATOM 4338 CB VAL B 74     | -52.405 | -15.993 | 4.362  | 1.00  | 45.42 |       | CO |
| ANISOU 4338 CB VAL B 74   | 7480    | 6200    | 3580   | -360  | -320  | -1320 | CO |
| ATOM 4339 CG1 VAL B 74    | -52.456 | -16.898 | 3.141  | 1.00  | 47.62 |       | CO |
| ANISOU 4339 CG1 VAL B 74  | 8050    | 6400    | 3640   | -350  | -360  | -1460 | CO |
| ATOM 4340 CG2 VAL B 74    | -53.252 | -14.751 | 4.144  | 1.00  | 45.06 |       | CO |
| ANISOU 4340 CG2 VAL B 74  | 7230    | 6340    | 3550   | -400  | -450  | -1250 | CO |
| ATOM 4341 H VAL B 74      | -54.732 | -16.291 | 6.055  | 1.00  | 45.41 |       | HO |
| ANISOU 4341 H VAL B 74    | 7170    | 6210    | 3870   | -760  | -560  | -1370 | HO |
| ATOM 4342 HA VAL B 74     | -52.334 | -17.612 | 5.641  | 1.00  | 45.55 |       | HO |
| ANISOU 4342 HA VAL B 74   | 7590    | 5970    | 3740   | -460  | -250  | -1390 | HO |
| ATOM 4343 HB VAL B 74     | -51.468 | -15.696 | 4.469  | 1.00  | 44.70 |       | HO |
| ANISOU 4343 HB VAL B 74   | 7370    | 6110    | 3500   | -230  | -190  | -1240 | HO |
| ATOM 4344 HG11 VAL B 74   | -51.835 | -17.638 | 3.259  | 1.00  | 48.09 |       | HO |

|                           |         |         |       |      |       |       |    |
|---------------------------|---------|---------|-------|------|-------|-------|----|
| ANISOU 4344 HG11 VAL B 74 | 8250    | 6340    | 3680  | -290 | -260  | -1490 | H0 |
| ATOM 4345 HG12 VAL B 74   | -52.207 | -16.390 | 2.350 | 1.00 | 48.12 |       | H0 |
| ANISOU 4345 HG12 VAL B 74 | 8150    | 6550    | 3590  | -260 | -350  | -1440 | H0 |
| ATOM 4346 HG13 VAL B 74   | -53.357 | -17.246 | 3.032 | 1.00 | 48.60 |       | H0 |
| ANISOU 4346 HG13 VAL B 74 | 8190    | 6520    | 3750  | -490 | -500  | -1540 | H0 |
| ATOM 4347 HG21 VAL B 74   | -54.176 | -15.011 | 3.981 | 1.00 | 45.91 |       | H0 |
| ANISOU 4347 HG21 VAL B 74 | 7340    | 6460    | 3640  | -530 | -590  | -1330 | H0 |
| ATOM 4348 HG22 VAL B 74   | -52.914 | -14.259 | 3.375 | 1.00 | 45.41 |       | H0 |
| ANISOU 4348 HG22 VAL B 74 | 7330    | 6440    | 3480  | -300 | -430  | -1220 | H0 |
| ATOM 4349 HG23 VAL B 74   | -53.210 | -14.184 | 4.933 | 1.00 | 43.58 |       | H0 |
| ANISOU 4349 HG23 VAL B 74 | 6880    | 6180    | 3500  | -400 | -420  | -1170 | H0 |
| ATOM 4350 N SER B 75      | -51.082 | -16.208 | 7.293 | 1.00 | 41.09 |       | N0 |
| ANISOU 4350 N SER B 75    | 6670    | 5520    | 3430  | -300 | -60   | -1140 | N0 |
| ATOM 4351 CA SER B 75     | -50.360 | -15.357 | 8.267 | 1.00 | 39.51 |       | C0 |
| ANISOU 4351 CA SER B 75   | 6270    | 5380    | 3370  | -220 | 40    | -1000 | C0 |
| ATOM 4352 C SER B 75      | -49.728 | -14.189 | 7.502 | 1.00 | 39.43 |       | C0 |
| ANISOU 4352 C SER B 75    | 6190    | 5510    | 3290  | -100 | 80    | -910  | C0 |
| ATOM 4353 O SER B 75      | -49.081 | -14.438 | 6.464 | 1.00 | 40.03 |       | O0 |
| ANISOU 4353 O SER B 75    | 6420    | 5580    | 3210  | 10   | 150   | -930  | O0 |
| ATOM 4354 CB SER B 75     | -49.353 | -16.159 | 9.041 | 1.00 | 39.43 |       | C0 |
| ANISOU 4354 CB SER B 75   | 6310    | 5260    | 3410  | -130 | 180   | -970  | C0 |
| ATOM 4355 OG SER B 75     | -49.991 | -17.234 | 9.716 | 1.00 | 40.01 |       | O0 |
| ANISOU 4355 OG SER B 75   | 6470    | 5180    | 3540  | -250 | 140   | -1050 | O0 |
| ATOM 4356 H SER B 75      | -50.572 | -16.900 | 6.989 | 1.00 | 42.08 |       | H0 |
| ANISOU 4356 H SER B 75    | 6950    | 5560    | 3480  | -240 | 10    | -1180 | H0 |
| ATOM 4357 HA SER B 75     | -51.025 | -14.990 | 8.907 | 1.00 | 38.71 |       | H0 |
| ANISOU 4357 HA SER B 75   | 6030    | 5310    | 3370  | -320 | -30   | -970  | H0 |
| ATOM 4358 HB2 SER B 75    | -48.672 | -16.514 | 8.426 | 1.00 | 40.30 |       | H0 |
| ANISOU 4358 HB2 SER B 75  | 6550    | 5340    | 3420  | -20  | 250   | -990  | H0 |
| ATOM 4359 HB3 SER B 75    | -48.903 | -15.578 | 9.696 | 1.00 | 38.25 |       | H0 |
| ANISOU 4359 HB3 SER B 75  | 6020    | 5160    | 3350  | -90  | 220   | -890  | H0 |
| ATOM 4360 N VAL B 76      | -49.947 | -12.963 | 7.985 | 1.00 | 38.60 |       | N0 |
| ANISOU 4360 N VAL B 76    | 5880    | 5500    | 3280  | -130 | 50    | -810  | N0 |
| ATOM 4361 CA VAL B 76     | -49.543 | -11.700 | 7.307 | 1.00 | 38.85 |       | C0 |
| ANISOU 4361 CA VAL B 76   | 5850    | 5650    | 3250  | -50  | 80    | -710  | C0 |
| ATOM 4362 C VAL B 76      | -48.870 | -10.792 | 8.330 | 1.00 | 38.05 |       | C0 |
| ANISOU 4362 C VAL B 76    | 5570    | 5590    | 3300  | -30  | 160   | -580  | C0 |
| ATOM 4363 O VAL B 76      | -49.386 | -10.606 | 9.432 | 1.00 | 37.38 |       | O0 |
| ANISOU 4363 O VAL B 76    | 5360    | 5490    | 3350  | -110 | 110   | -570  | O0 |
| ATOM 4364 CB VAL B 76     | -50.758 | -11.016 | 6.655 | 1.00 | 39.30 |       | C0 |
| ANISOU 4364 CB VAL B 76   | 5890    | 5800    | 3250  | -120 | -80   | -730  | C0 |
| ATOM 4365 CG1 VAL B 76    | -50.382 | -9.712  | 5.965 | 1.00 | 39.48 |       | C0 |
| ANISOU 4365 CG1 VAL B 76  | 5880    | 5920    | 3200  | -30  | -40   | -620  | C0 |
| ATOM 4366 CG2 VAL B 76    | -51.460 | -11.951 | 5.684 | 1.00 | 41.20 |       | C0 |
| ANISOU 4366 CG2 VAL B 76  | 6310    | 6010    | 3340  | -160 | -180  | -860  | C0 |
| ATOM 4367 H VAL B 76      | -50.370 | -12.822 | 8.780 | 1.00 | 37.77 |       | H0 |
| ANISOU 4367 H VAL B 76    | 5670    | 5400    | 3280  | -200 | 20    | -790  | H0 |
| ATOM 4368 HA VAL B 76     | -48.902 | -11.919 | 6.611 | 1.00 | 39.73 |       | H0 |
| ANISOU 4368 HA VAL B 76   | 6070    | 5760    | 3260  | 30   | 150   | -710  | H0 |
| ATOM 4369 HB VAL B 76     | -51.397 | -10.800 | 7.378 | 1.00 | 38.63 |       | H0 |
| ANISOU 4369 HB VAL B 76   | 5690    | 5720    | 3270  | -190 | -140  | -720  | H0 |
| ATOM 4370 HG11 VAL B 76   | -50.179 | -9.037  | 6.634 | 1.00 | 38.38 |       | H0 |
| ANISOU 4370 HG11 VAL B 76 | 5620    | 5790    | 3170  | -40  | -10   | -540  | H0 |
| ATOM 4371 HG12 VAL B 76   | -51.125 | -9.409  | 5.416 | 1.00 | 40.03 |       | H0 |

|                           |         |         |        |      |       |      |    |
|---------------------------|---------|---------|--------|------|-------|------|----|
| ANISOU 4371 HG12 VAL B 76 | 5960    | 6040    | 3210   | -50  | -140  | -640 | H0 |
| ATOM 4372 HG13 VAL B 76   | -49.602 | -9.856  | 5.402  | 1.00 | 40.01 |      | H0 |
| ANISOU 4372 HG13 VAL B 76 | 6030    | 5980    | 3190   | 50   | 50    | -600 | H0 |
| ATOM 4373 HG21 VAL B 76   | -50.812 | -12.316 | 5.057  | 1.00 | 41.96 |      | H0 |
| ANISOU 4373 HG21 VAL B 76 | 6530    | 6080    | 3330   | -80  | -100  | -880 | H0 |
| ATOM 4374 HG22 VAL B 76   | -52.143 | -11.460 | 5.195  | 1.00 | 41.62 |      | H0 |
| ANISOU 4374 HG22 VAL B 76 | 6340    | 6140    | 3340   | -190 | -280  | -870 | H0 |
| ATOM 4375 HG23 VAL B 76   | -51.878 | -12.679 | 6.177  | 1.00 | 41.23 |      | H0 |
| ANISOU 4375 HG23 VAL B 76 | 6320    | 5950    | 3400   | -250 | -210  | -930 | H0 |
| ATOM 4376 N PROB 77       | -47.699 | -10.197 | 8.006  | 1.00 | 38.54 |      | N0 |
| ANISOU 4376 N PROB 77     | 5600    | 5700    | 3340   | 70   | 280   | -490 | N0 |
| ATOM 4377 CA PROB 77      | -47.084 | -9.210  | 8.890  | 1.00 | 37.85 |      | C0 |
| ANISOU 4377 CA PROB 77    | 5340    | 5660    | 3380   | 70   | 330   | -370 | C0 |
| ATOM 4378 C PROB 77       | -48.034 | -8.010  | 9.024  | 1.00 | 37.50 |      | C0 |
| ANISOU 4378 C PROB 77     | 5220    | 5650    | 3380   | -10  | 220   | -330 | C0 |
| ATOM 4379 O PROB 77       | -48.601 | -7.589  | 8.038  | 1.00 | 38.16 |      | O0 |
| ANISOU 4379 O PROB 77     | 5370    | 5780    | 3350   | 0    | 170   | -340 | O0 |
| ATOM 4380 CB PROB 77      | -45.753 | -8.856  | 8.209  | 1.00 | 38.07 |      | C0 |
| ANISOU 4380 CB PROB 77    | 5380    | 5750    | 3340   | 170  | 480   | -290 | C0 |
| ATOM 4381 CG PROB 77      | -45.973 | -9.230  | 6.764  | 1.00 | 39.82 |      | C0 |
| ANISOU 4381 CG PROB 77    | 5780    | 5980    | 3370   | 230  | 480   | -340 | C0 |
| ATOM 4382 CD PROB 77      | -46.909 | -10.422 | 6.785  | 1.00 | 39.97 |      | C0 |
| ANISOU 4382 CD PROB 77    | 5920    | 5910    | 3360   | 190  | 380   | -490 | C0 |
| ATOM 4383 HA PROB 77      | -46.911 | -9.616  | 9.775  | 1.00 | 37.11 |      | H0 |
| ANISOU 4383 HA PROB 77    | 5200    | 5520    | 3380   | 50   | 350   | -380 | H0 |
| ATOM 4384 HB2 PROB 77     | -45.555 | -7.899  | 8.296  | 1.00 | 37.90 |      | H0 |
| ANISOU 4384 HB2 PROB 77   | 5280    | 5770    | 3360   | 150  | 490   | -210 | H0 |
| ATOM 4385 HB3 PROB 77     | -45.012 | -9.370  | 8.594  | 1.00 | 38.29 |      | H0 |
| ANISOU 4385 HB3 PROB 77   | 5380    | 5760    | 3400   | 210  | 560   | -280 | H0 |
| ATOM 4386 HG2 PROB 77     | -46.375 | -8.485  | 6.273  | 1.00 | 39.88 |      | H0 |
| ANISOU 4386 HG2 PROB 77   | 5790    | 6030    | 3330   | 210  | 440   | -310 | H0 |
| ATOM 4387 HG3 PROB 77     | -45.125 | -9.465  | 6.338  | 1.00 | 40.52 |      | H0 |
| ANISOU 4387 HG3 PROB 77   | 5910    | 6090    | 3400   | 310  | 590   | -320 | H0 |
| ATOM 4388 HD2 PROB 77     | -47.477 | -10.434 | 5.992  | 1.00 | 40.79 |      | H0 |
| ANISOU 4388 HD2 PROB 77   | 6120    | 6030    | 3350   | 180  | 320   | -530 | H0 |
| ATOM 4389 HD3 PROB 77     | -46.414 | -11.260 | 6.836  | 1.00 | 40.48 |      | H0 |
| ANISOU 4389 HD3 PROB 77   | 6050    | 5930    | 3400   | 240  | 450   | -520 | H0 |
| ATOM 4390 N ILE B 78      | -48.200 | -7.504  | 10.244 | 1.00 | 36.80 |      | N0 |
| ANISOU 4390 N ILE B 78    | 5000    | 5550    | 3430   | -60  | 200   | -290 | N0 |
| ATOM 4391 CA ILE B 78     | -49.183 | -6.426  | 10.553 | 1.00 | 36.89 |      | C0 |
| ANISOU 4391 CA ILE B 78   | 4930    | 5590    | 3490   | -120 | 100   | -260 | C0 |
| ATOM 4392 C ILE B 78      | -48.808 | -5.130  | 9.821  | 1.00 | 37.71 |      | C0 |
| ANISOU 4392 C ILE B 78    | 5050    | 5740    | 3540   | -70  | 130   | -160 | C0 |
| ATOM 4393 O ILE B 78      | -49.711 | -4.304  | 9.620  | 1.00 | 37.89 |      | O0 |
| ANISOU 4393 O ILE B 78    | 5070    | 5780    | 3550   | -80  | 50    | -140 | O0 |
| ATOM 4394 CB ILE B 78     | -49.316 | -6.236  | 12.073 | 1.00 | 36.34 |      | C0 |
| ANISOU 4394 CB ILE B 78   | 4750    | 5480    | 3580   | -170 | 90    | -250 | C0 |
| ATOM 4395 CG1 ILE B 78    | -48.015 | -5.747  | 12.719 | 1.00 | 36.30 |      | C0 |
| ANISOU 4395 CG1 ILE B 78  | 4670    | 5470    | 3640   | -150 | 190   | -170 | C0 |
| ATOM 4396 CG2 ILE B 78    | -49.820 | -7.527  | 12.702 | 1.00 | 36.48 |      | C0 |
| ANISOU 4396 CG2 ILE B 78  | 4770    | 5450    | 3640   | -210 | 60    | -340 | C0 |
| ATOM 4397 CD1 ILE B 78    | -48.171 | -5.335  | 14.165 | 1.00 | 35.24 |      | C0 |
| ANISOU 4397 CD1 ILE B 78  | 4440    | 5310    | 3640   | -200 | 160   | -150 | C0 |
| ATOM 4398 H ILE B 78      | -47.716 | -7.785  | 10.961 | 1.00 | 36.36 |      | H0 |



|                           |         |        |        |      |       |      |    |
|---------------------------|---------|--------|--------|------|-------|------|----|
| ANISOU 4398 H ILE B 78    | 4890    | 5470   | 3450   | -70  | 240   | -290 | H0 |
| ATOM 4399 HA ILE B 78     | -50.050 | -6.715 | 10.217 | 1.00 | 37.38 |      | H0 |
| ANISOU 4399 HA ILE B 78   | 5030    | 5660   | 3510   | -140 | 20    | -320 | H0 |
| ATOM 4400 HB ILE B 78     | -50.001 | -5.541 | 12.225 | 1.00 | 36.16 |      | H0 |
| ANISOU 4400 HB ILE B 78   | 4680    | 5480   | 3580   | -190 | 30    | -230 | H0 |
| ATOM 4401 HG12 ILE B 78   | -47.347 | -6.463 | 12.666 | 1.00 | 36.40 |      | H0 |
| ANISOU 4401 HG12 ILE B 78 | 4710    | 5480   | 3640   | -130 | 240   | -180 | H0 |
| ATOM 4402 HG13 ILE B 78   | -47.676 | -4.981 | 12.210 | 1.00 | 36.50 |      | H0 |
| ANISOU 4402 HG13 ILE B 78 | 4710    | 5520   | 3640   | -140 | 210   | -110 | H0 |
| ATOM 4403 HG21 ILE B 78   | -50.522 | -7.910 | 12.147 | 1.00 | 36.99 |      | H0 |
| ANISOU 4403 HG21 ILE B 78 | 4890    | 5520   | 3640   | -230 | 0     | -390 | H0 |
| ATOM 4404 HG22 ILE B 78   | -50.177 | -7.337 | 13.586 | 1.00 | 35.76 |      | H0 |
| ANISOU 4404 HG22 ILE B 78 | 4610    | 5350   | 3630   | -250 | 40    | -330 | H0 |
| ATOM 4405 HG23 ILE B 78   | -49.087 | -8.162 | 12.780 | 1.00 | 36.49 |      | H0 |
| ANISOU 4405 HG23 ILE B 78 | 4810    | 5420   | 3630   | -190 | 120   | -350 | H0 |
| ATOM 4406 HD11 ILE B 78   | -48.898 | -4.693 | 14.244 | 1.00 | 35.11 |      | H0 |
| ANISOU 4406 HD11 ILE B 78 | 4410    | 5290   | 3630   | -220 | 100   | -140 | H0 |
| ATOM 4407 HD12 ILE B 78   | -47.345 | -4.928 | 14.478 | 1.00 | 35.13 |      | H0 |
| ANISOU 4407 HD12 ILE B 78 | 4390    | 5300   | 3660   | -200 | 210   | -100 | H0 |
| ATOM 4408 HD13 ILE B 78   | -48.371 | -6.118 | 14.707 | 1.00 | 35.00 |      | H0 |
| ANISOU 4408 HD13 ILE B 78 | 4410    | 5250   | 3640   | -220 | 150   | -200 | H0 |
| ATOM 4409 N SER B 79      | -47.547 | -4.960 | 9.408  | 1.00 | 38.74 |      | N0 |
| ANISOU 4409 N SER B 79    | 5200    | 5880   | 3640   | -30  | 260   | -100 | N0 |
| ATOM 4410 CA SER B 79     | -47.073 | -3.778 | 8.638  | 1.00 | 39.72 |      | C0 |
| ANISOU 4410 CA SER B 79   | 5350    | 6040   | 3700   | -10  | 310   | 10   | C0 |
| ATOM 4411 C SER B 79      | -47.778 | -3.711 | 7.275  | 1.00 | 40.36 |      | C0 |
| ANISOU 4411 C SER B 79    | 5570    | 6160   | 3610   | 50   | 260   | -10  | C0 |
| ATOM 4412 O SER B 79      | -47.847 | -2.613 | 6.708  | 1.00 | 41.48 |      | O0 |
| ANISOU 4412 O SER B 79    | 5750    | 6310   | 3700   | 70   | 260   | 80   | O0 |
| ATOM 4413 CB SER B 79     | -45.565 | -3.770 | 8.487  | 1.00 | 40.53 |      | C0 |
| ANISOU 4413 CB SER B 79   | 5420    | 6170   | 3810   | 10   | 470   | 80   | C0 |
| ATOM 4414 OG SER B 79     | -45.105 | -4.955 | 7.852  | 1.00 | 41.93 |      | O0 |
| ANISOU 4414 OG SER B 79   | 5670    | 6370   | 3890   | 90   | 540   | 30   | O0 |
| ATOM 4415 H SER B 79      | -46.876 | -5.549 | 9.585  | 1.00 | 38.67 |      | H0 |
| ANISOU 4415 H SER B 79    | 5180    | 5870   | 3640   | -20  | 320   | -110 | H0 |
| ATOM 4416 HA SER B 79     | -47.332 | -2.966 | 9.151  | 1.00 | 39.14 |      | H0 |
| ANISOU 4416 HA SER B 79   | 5230    | 5950   | 3690   | -40  | 280   | 50   | H0 |
| ATOM 4417 HB2 SER B 79    | -45.296 | -2.987 | 7.956  | 1.00 | 41.20 |      | H0 |
| ANISOU 4417 HB2 SER B 79  | 5530    | 6270   | 3850   | 10   | 510   | 160  | H0 |
| ATOM 4418 HB3 SER B 79    | -45.150 | -3.693 | 9.376  | 1.00 | 39.95 |      | H0 |
| ANISOU 4418 HB3 SER B 79  | 5250    | 6080   | 3840   | -30  | 480   | 100  | H0 |
| ATOM 4419 N SER B 80      | -48.290 | -4.836 | 6.772  | 1.00 | 40.48 |      | N0 |
| ANISOU 4419 N SER B 80    | 5660    | 6180   | 3540   | 70   | 200   | -110 | N0 |
| ATOM 4420 CA SER B 80     | -49.027 | -4.916 | 5.484  | 1.00 | 41.70 |      | C0 |
| ANISOU 4420 CA SER B 80   | 5950    | 6380   | 3520   | 120  | 120   | -150 | C0 |
| ATOM 4421 C SER B 80      | -50.520 | -4.624 | 5.684  | 1.00 | 41.34 |      | C0 |
| ANISOU 4421 C SER B 80    | 5860    | 6350   | 3490   | 80   | -50   | -200 | C0 |
| ATOM 4422 O SER B 80      | -51.222 | -4.536 | 4.671  | 1.00 | 42.53 |      | O0 |
| ANISOU 4422 O SER B 80    | 6100    | 6560   | 3500   | 110  | -150  | -220 | O0 |
| ATOM 4423 CB SER B 80     | -48.821 | -6.253 | 4.827  | 1.00 | 43.01 |      | C0 |
| ANISOU 4423 CB SER B 80   | 6240    | 6530   | 3570   | 150  | 150   | -260 | C0 |
| ATOM 4424 OG SER B 80     | -47.449 | -6.458 | 4.521  | 1.00 | 43.81 |      | O0 |
| ANISOU 4424 OG SER B 80   | 6380    | 6640   | 3630   | 220  | 320   | -210 | O0 |
| ATOM 4425 H SER B 80      | -48.208 | -5.649 | 7.173  | 1.00 | 40.25 |      | H0 |

|                           |         |        |        |      |       |      |    |
|---------------------------|---------|--------|--------|------|-------|------|----|
| ANISOU 4425 H SER B 80    | 5620    | 6120   | 3550   | 50   | 210   | -170 | H0 |
| ATOM 4426 HA SER B 80     | -48.658 | -4.217 | 4.881  | 1.00 | 42.38 |      | H0 |
| ANISOU 4426 HA SER B 80   | 6080    | 6490   | 3530   | 160  | 180   | -80  | H0 |
| ATOM 4427 HB2 SER B 80    | -49.134 | -6.965 | 5.429  | 1.00 | 42.51 |      | H0 |
| ANISOU 4427 HB2 SER B 80  | 6150    | 6430   | 3570   | 100  | 110   | -330 | H0 |
| ATOM 4428 HB3 SER B 80    | -49.352 | -6.296 | 3.999  | 1.00 | 43.98 |      | H0 |
| ANISOU 4428 HB3 SER B 80  | 6460    | 6690   | 3560   | 170  | 80    | -290 | H0 |
| ATOM 4429 N LEU B 81      | -50.984 | -4.459 | 6.932  | 1.00 | 39.64 |      | N0 |
| ANISOU 4429 N LEU B 81    | 5510    | 6110   | 3440   | 10   | -100  | -200 | N0 |
| ATOM 4430 CA LEU B 81     | -52.430 | -4.377 | 7.279  | 1.00 | 39.38 |      | C0 |
| ANISOU 4430 CA LEU B 81   | 5400    | 6120   | 3450   | -20  | -250  | -250 | C0 |
| ATOM 4431 C LEU B 81      | -52.713 | -3.075 | 8.025  | 1.00 | 37.83 |      | C0 |
| ANISOU 4431 C LEU B 81    | 5110    | 5910   | 3350   | -10  | -260  | -160 | C0 |
| ATOM 4432 O LEU B 81      | -51.818 | -2.602 | 8.746  | 1.00 | 36.18 |      | O0 |
| ANISOU 4432 O LEU B 81    | 4870    | 5640   | 3230   | -20  | -160  | -90  | O0 |
| ATOM 4433 CB LEU B 81     | -52.814 | -5.567 | 8.165  | 1.00 | 39.07 |      | C0 |
| ANISOU 4433 CB LEU B 81   | 5300    | 6040   | 3510   | -120 | -280  | -350 | C0 |
| ATOM 4434 CG LEU B 81     | -52.523 | -6.951 | 7.595  | 1.00 | 40.62 |      | C0 |
| ANISOU 4434 CG LEU B 81   | 5610    | 6210   | 3620   | -140 | -270  | -460 | C0 |
| ATOM 4435 CD1 LEU B 81    | -53.027 | -8.029 | 8.540  | 1.00 | 40.74 |      | C0 |
| ANISOU 4435 CD1 LEU B 81  | 5570    | 6170   | 3740   | -250 | -300  | -550 | C0 |
| ATOM 4436 CD2 LEU B 81    | -53.144 | -7.125 | 6.219  | 1.00 | 42.72 |      | C0 |
| ANISOU 4436 CD2 LEU B 81  | 5990    | 6540   | 3700   | -120 | -370  | -510 | C0 |
| ATOM 4437 H LEU B 81      | -50.438 | -4.381 | 7.652  | 1.00 | 38.89 |      | H0 |
| ANISOU 4437 H LEU B 81    | 5360    | 5980   | 3440   | -10  | -30   | -170 | H0 |
| ATOM 4438 HA LEU B 81     | -52.960 | -4.392 | 6.450  | 1.00 | 40.36 |      | H0 |
| ANISOU 4438 HA LEU B 81   | 5580    | 6290   | 3460   | 0    | -330  | -270 | H0 |
| ATOM 4439 HB2 LEU B 81    | -52.340 | -5.479 | 9.016  | 1.00 | 38.22 |      | H0 |
| ANISOU 4439 HB2 LEU B 81  | 5130    | 5890   | 3500   | -130 | -220  | -330 | H0 |
| ATOM 4440 HB3 LEU B 81    | -53.771 | -5.508 | 8.356  | 1.00 | 39.35 |      | H0 |
| ANISOU 4440 HB3 LEU B 81  | 5270    | 6120   | 3570   | -150 | -380  | -380 | H0 |
| ATOM 4441 HG LEU B 81     | -51.543 | -7.051 | 7.507  | 1.00 | 40.49 |      | H0 |
| ANISOU 4441 HG LEU B 81   | 5640    | 6150   | 3590   | -100 | -160  | -430 | H0 |
| ATOM 4442 HD11 LEU B 81   | -52.595 | -7.929 | 9.406  | 1.00 | 39.59 |      | H0 |
| ANISOU 4442 HD11 LEU B 81 | 5370    | 5980   | 3690   | -250 | -230  | -510 | H0 |
| ATOM 4443 HD12 LEU B 81   | -52.819 | -8.906 | 8.174  | 1.00 | 41.20 |      | H0 |
| ANISOU 4443 HD12 LEU B 81 | 5730    | 6180   | 3740   | -260 | -290  | -610 | H0 |
| ATOM 4444 HD13 LEU B 81   | -53.990 | -7.943 | 8.647  | 1.00 | 40.84 |      | H0 |
| ANISOU 4444 HD13 LEU B 81 | 5520    | 6220   | 3770   | -290 | -400  | -570 | H0 |
| ATOM 4445 HD21 LEU B 81   | -54.070 | -6.826 | 6.242  | 1.00 | 42.88 |      | H0 |
| ANISOU 4445 HD21 LEU B 81 | 5950    | 6610   | 3730   | -140 | -480  | -520 | H0 |
| ATOM 4446 HD22 LEU B 81   | -53.114 | -8.064 | 5.965  | 1.00 | 43.18 |      | H0 |
| ANISOU 4446 HD22 LEU B 81 | 6130    | 6560   | 3710   | -150 | -380  | -600 | H0 |
| ATOM 4447 HD23 LEU B 81   | -52.649 | -6.598 | 5.569  | 1.00 | 42.97 |      | H0 |
| ANISOU 4447 HD23 LEU B 81 | 6090    | 6590   | 3650   | -40  | -320  | -460 | H0 |
| ATOM 4448 N TRP B 82      | -53.930 | -2.543 | 7.890  | 1.00 | 38.12 |      | N0 |
| ANISOU 4448 N TRP B 82    | 5100    | 6010   | 3370   | 20   | -390  | -160 | N0 |
| ATOM 4449 CA TRP B 82     | -54.477 | -1.586 | 8.883  | 1.00 | 37.38 |      | C0 |
| ANISOU 4449 CA TRP B 82   | 4910    | 5910   | 3390   | 40   | -410  | -100 | C0 |
| ATOM 4450 C TRP B 82      | -54.647 | -2.346 | 10.200 | 1.00 | 36.62 |      | C0 |
| ANISOU 4450 C TRP B 82    | 4690    | 5780   | 3440   | -50  | -400  | -170 | C0 |
| ATOM 4451 O TRP B 82      | -55.121 | -3.502 | 10.166 | 1.00 | 36.86 |      | O0 |
| ANISOU 4451 O TRP B 82    | 4690    | 5840   | 3470   | -120 | -450  | -260 | O0 |
| ATOM 4452 CB TRP B 82     | -55.791 | -0.931 | 8.444  | 1.00 | 38.27 |      | C0 |

|                          |         |        |        |      |       |      |    |
|--------------------------|---------|--------|--------|------|-------|------|----|
| ANISOU 4452 CB TRP B 82  | 4980    | 6120   | 3440   | 120  | -540  | -90  | C0 |
| ATOM 4453 CG TRP B 82    | -56.363 | -0.045 | 9.511  | 1.00 | 37.77 |      | C0 |
| ANISOU 4453 CG TRP B 82  | 4820    | 6040   | 3490   | 160  | -550  | -40  | C0 |
| ATOM 4454 CD1 TRP B 82   | -56.038 | 1.257  | 9.765  | 1.00 | 37.63 |      | C0 |
| ANISOU 4454 CD1 TRP B 82 | 4860    | 5940   | 3490   | 240  | -500  | 60   | C0 |
| ATOM 4455 CD2 TRP B 82   | -57.326 | -0.415 | 10.514 | 1.00 | 37.17 |      | C0 |
| ANISOU 4455 CD2 TRP B 82 | 4590    | 6010   | 3530   | 130  | -600  | -100 | C0 |
| ATOM 4456 NE1 TRP B 82   | -56.745 | 1.726  | 10.838 | 1.00 | 37.32 |      | N0 |
| ANISOU 4456 NE1 TRP B 82 | 4720    | 5900   | 3560   | 270  | -510  | 60   | N0 |
| ATOM 4457 CE2 TRP B 82   | -57.546 | 0.724  | 11.317 | 1.00 | 37.14 |      | C0 |
| ANISOU 4457 CE2 TRP B 82 | 4560    | 5960   | 3590   | 210  | -570  | -30  | C0 |
| ATOM 4458 CE3 TRP B 82   | -58.036 | -1.586 | 10.799 | 1.00 | 37.20 |      | C0 |
| ANISOU 4458 CE3 TRP B 82 | 4480    | 6080   | 3570   | 30   | -660  | -200 | C0 |
| ATOM 4459 CZ2 TRP B 82   | -58.438 | 0.718  | 12.386 | 1.00 | 36.87 |      | C0 |
| ANISOU 4459 CZ2 TRP B 82 | 4380    | 5970   | 3660   | 210  | -590  | -50  | C0 |
| ATOM 4460 CZ3 TRP B 82   | -58.921 | -1.587 | 11.854 | 1.00 | 37.16 |      | C0 |
| ANISOU 4460 CZ3 TRP B 82 | 4320    | 6120   | 3680   | 10   | -680  | -210 | C0 |
| ATOM 4461 CH2 TRP B 82   | -59.117 | -0.451 | 12.637 | 1.00 | 36.64 |      | C0 |
| ANISOU 4461 CH2 TRP B 82 | 4220    | 6030   | 3670   | 120  | -640  | -140 | C0 |
| ATOM 4462 H TRP B 82     | -54.490 | -2.728 | 7.196  | 1.00 | 39.09 |      | H0 |
| ANISOU 4462 H TRP B 82   | 5250    | 6200   | 3400   | 40   | -470  | -190 | H0 |
| ATOM 4463 HA TRP B 82    | -53.812 | -0.872 | 9.011  | 1.00 | 37.15 |      | H0 |
| ANISOU 4463 HA TRP B 82  | 4910    | 5830   | 3380   | 70   | -340  | -30  | H0 |
| ATOM 4464 HB2 TRP B 82   | -55.625 | -0.404 | 7.636  | 1.00 | 39.08 |      | H0 |
| ANISOU 4464 HB2 TRP B 82 | 5170    | 6230   | 3450   | 190  | -550  | -30  | H0 |
| ATOM 4465 HB3 TRP B 82   | -56.435 | -1.635 | 8.224  | 1.00 | 38.83 |      | H0 |
| ANISOU 4465 HB3 TRP B 82 | 5010    | 6250   | 3490   | 90   | -630  | -160 | H0 |
| ATOM 4466 HD1 TRP B 82   | -55.418 | 1.769  | 9.269  | 1.00 | 37.89 |      | H0 |
| ANISOU 4466 HD1 TRP B 82 | 5000    | 5930   | 3470   | 270  | -450  | 120  | H0 |
| ATOM 4467 HE1 TRP B 82   | -56.696 | 2.535  | 11.161 | 1.00 | 37.34 |      | H0 |
| ANISOU 4467 HE1 TRP B 82 | 4760    | 5850   | 3580   | 320  | -490  | 110  | H0 |
| ATOM 4468 HE3 TRP B 82   | -57.908 | -2.362 | 10.277 | 1.00 | 37.57 |      | H0 |
| ANISOU 4468 HE3 TRP B 82 | 4560    | 6150   | 3570   | -30  | -680  | -250 | H0 |
| ATOM 4469 HZ2 TRP B 82   | -58.575 | 1.488  | 12.911 | 1.00 | 36.77 |      | H0 |
| ANISOU 4469 HZ2 TRP B 82 | 4370    | 5920   | 3680   | 280  | -570  | -10  | H0 |
| ATOM 4470 HZ3 TRP B 82   | -59.400 | -2.374 | 12.056 | 1.00 | 37.31 |      | H0 |
| ANISOU 4470 HZ3 TRP B 82 | 4260    | 6190   | 3730   | -70  | -710  | -270 | H0 |
| ATOM 4471 HH2 TRP B 82   | -59.728 | -0.483 | 13.351 | 1.00 | 36.81 |      | H0 |
| ANISOU 4471 HH2 TRP B 82 | 4140    | 6090   | 3760   | 110  | -650  | -150 | H0 |
| ATOM 4472 N VAL B 83     | -54.244 | -1.720 | 11.301 | 1.00 | 35.51 |      | N0 |
| ANISOU 4472 N VAL B 83   | 4510    | 5570   | 3410   | -50  | -330  | -120 | N0 |
| ATOM 4473 CA VAL B 83    | -54.453 | -2.227 | 12.687 | 1.00 | 35.39 |      | C0 |
| ANISOU 4473 CA VAL B 83  | 4390    | 5530   | 3530   | -120 | -310  | -160 | C0 |
| ATOM 4474 C VAL B 83     | -55.026 | -1.083 | 13.518 | 1.00 | 34.31 |      | C0 |
| ANISOU 4474 C VAL B 83   | 4190    | 5380   | 3460   | -60  | -320  | -110 | C0 |
| ATOM 4475 O VAL B 83     | -54.599 | 0.063  | 13.379 | 1.00 | 34.57 |      | O0 |
| ANISOU 4475 O VAL B 83   | 4300    | 5370   | 3470   | 0    | -290  | -30  | O0 |
| ATOM 4476 CB VAL B 83    | -53.132 | -2.770 | 13.258 | 1.00 | 35.19 |      | C0 |
| ANISOU 4476 CB VAL B 83  | 4390    | 5430   | 3560   | -170 | -200  | -160 | C0 |
| ATOM 4477 CG1 VAL B 83   | -53.252 | -3.167 | 14.720 | 1.00 | 35.57 |      | C0 |
| ANISOU 4477 CG1 VAL B 83 | 4350    | 5440   | 3720   | -220 | -180  | -190 | C0 |
| ATOM 4478 CG2 VAL B 83   | -52.621 | -3.936 | 12.426 | 1.00 | 35.70 |      | C0 |
| ANISOU 4478 CG2 VAL B 83 | 4520    | 5500   | 3540   | -190 | -180  | -220 | C0 |
| ATOM 4479 H VAL B 83     | -53.801 | -0.924 | 11.274 | 1.00 | 35.68 |      | H0 |

|                           |         |        |        |      |       |      |    |
|---------------------------|---------|--------|--------|------|-------|------|----|
| ANISOU 4479 H VAL B 83    | 4570    | 5560   | 3430   | -20  | -290  | -50  | H0 |
| ATOM 4480 HA VAL B 83     | -55.102 | -2.951 | 12.656 | 1.00 | 35.47 |      | H0 |
| ANISOU 4480 HA VAL B 83   | 4350    | 5580   | 3540   | -150 | -360  | -220 | H0 |
| ATOM 4481 HB VAL B 83     | -52.465 | -2.043 | 13.198 | 1.00 | 35.21 |      | H0 |
| ANISOU 4481 HB VAL B 83   | 4430    | 5400   | 3560   | -150 | -160  | -100 | H0 |
| ATOM 4482 HG11 VAL B 83   | -53.466 | -2.384 | 15.254 | 1.00 | 34.98 |      | H0 |
| ANISOU 4482 HG11 VAL B 83 | 4250    | 5350   | 3690   | -200 | -180  | -160 | H0 |
| ATOM 4483 HG12 VAL B 83   | -52.407 | -3.542 | 15.024 | 1.00 | 34.73 |      | H0 |
| ANISOU 4483 HG12 VAL B 83 | 4270    | 5290   | 3640   | -240 | -120  | -190 | H0 |
| ATOM 4484 HG13 VAL B 83   | -53.954 | -3.832 | 14.820 | 1.00 | 35.36 |      | H0 |
| ANISOU 4484 HG13 VAL B 83 | 4290    | 5440   | 3710   | -250 | -220  | -240 | H0 |
| ATOM 4485 HG21 VAL B 83   | -53.337 | -4.583 | 12.299 | 1.00 | 36.04 |      | H0 |
| ANISOU 4485 HG21 VAL B 83 | 4550    | 5570   | 3570   | -220 | -240  | -280 | H0 |
| ATOM 4486 HG22 VAL B 83   | -51.878 | -4.362 | 12.885 | 1.00 | 35.18 |      | H0 |
| ANISOU 4486 HG22 VAL B 83 | 4460    | 5390   | 3520   | -210 | -120  | -220 | H0 |
| ATOM 4487 HG23 VAL B 83   | -52.322 | -3.610 | 11.559 | 1.00 | 36.23 |      | H0 |
| ANISOU 4487 HG23 VAL B 83 | 4650    | 5580   | 3530   | -150 | -170  | -190 | H0 |
| ATOM 4488 N PROB 84       | -56.035 | -1.330 | 14.378 | 1.00 | 33.66 |      | N0 |
| ANISOU 4488 N PROB 84     | 4000    | 5340   | 3450   | -80  | -360  | -150 | N0 |
| ATOM 4489 CA PROB 84      | -56.571 | -0.271 | 15.228 | 1.00 | 33.58 |      | C0 |
| ANISOU 4489 CA PROB 84    | 3950    | 5320   | 3490   | 0    | -360  | -110 | C0 |
| ATOM 4490 C PROB 84       | -55.483 | 0.346  | 16.121 | 1.00 | 31.82 |      | C0 |
| ANISOU 4490 C PROB 84     | 3790    | 4970   | 3320   | -20  | -270  | -70  | C0 |
| ATOM 4491 O PROB 84       | -54.580 | -0.352 | 16.543 | 1.00 | 30.57 |      | O0 |
| ANISOU 4491 O PROB 84     | 3640    | 4770   | 3200   | -100 | -210  | -90  | O0 |
| ATOM 4492 CB PROB 84      | -57.693 | -0.957 | 16.025 | 1.00 | 33.95 |      | C0 |
| ANISOU 4492 CB PROB 84    | 3850    | 5440   | 3600   | -40  | -390  | -160 | C0 |
| ATOM 4493 CG PROB 84      | -57.388 | -2.427 | 15.925 | 1.00 | 33.77 |      | C0 |
| ANISOU 4493 CG PROB 84    | 3820    | 5420   | 3590   | -170 | -380  | -230 | C0 |
| ATOM 4494 CD PROB 84      | -56.731 | -2.609 | 14.574 | 1.00 | 34.21 |      | C0 |
| ANISOU 4494 CD PROB 84    | 3980    | 5470   | 3540   | -160 | -400  | -230 | C0 |
| ATOM 4495 HA PROB 84      | -56.967 | 0.431  | 14.654 | 1.00 | 34.22 |      | H0 |
| ANISOU 4495 HA PROB 84    | 4050    | 5430   | 3520   | 80   | -400  | -70  | H0 |
| ATOM 4496 HB2 PROB 84     | -57.689 | -0.663 | 16.959 | 1.00 | 33.49 |      | H0 |
| ANISOU 4496 HB2 PROB 84   | 3770    | 5350   | 3600   | -30  | -350  | -150 | H0 |
| ATOM 4497 HB3 PROB 84     | -58.570 | -0.758 | 15.635 | 1.00 | 34.81 |      | H0 |
| ANISOU 4497 HB3 PROB 84   | 3900    | 5640   | 3690   | 10   | -450  | -160 | H0 |
| ATOM 4498 HG2 PROB 84     | -56.784 | -2.705 | 16.643 | 1.00 | 32.97 |      | H0 |
| ANISOU 4498 HG2 PROB 84   | 3740    | 5250   | 3540   | -210 | -320  | -240 | H0 |
| ATOM 4499 HG3 PROB 84     | -58.210 | -2.956 | 15.984 | 1.00 | 34.30 |      | H0 |
| ANISOU 4499 HG3 PROB 84   | 3800    | 5560   | 3670   | -210 | -420  | -270 | H0 |
| ATOM 4500 HD2 PROB 84     | -56.106 | -3.356 | 14.586 | 1.00 | 33.73 |      | H0 |
| ANISOU 4500 HD2 PROB 84   | 3960    | 5370   | 3490   | -220 | -360  | -260 | H0 |
| ATOM 4501 HD3 PROB 84     | -57.395 | -2.759 | 13.876 | 1.00 | 34.99 |      | H0 |
| ANISOU 4501 HD3 PROB 84   | 4060    | 5640   | 3590   | -160 | -480  | -260 | H0 |
| ATOM 4502 N ASP B 85      | -55.594 | 1.655  | 16.352 | 1.00 | 32.45 |      | N0 |
| ANISOU 4502 N ASP B 85    | 3930    | 5000   | 3400   | 70   | -260  | -10  | N0 |
| ATOM 4503 CA ASP B 85     | -54.665 | 2.469  | 17.180 | 1.00 | 31.93 |      | C0 |
| ANISOU 4503 CA ASP B 85   | 3940    | 4810   | 3380   | 50   | -200  | 30   | C0 |
| ATOM 4504 C ASP B 85      | -55.087 | 2.359  | 18.653 | 1.00 | 31.82 |      | C0 |
| ANISOU 4504 C ASP B 85    | 3870    | 4780   | 3440   | 50   | -180  | -10  | C0 |
| ATOM 4505 O ASP B 85      | -55.333 | 3.400  | 19.279 | 1.00 | 31.36 |      | O0 |
| ANISOU 4505 O ASP B 85    | 3870    | 4650   | 3390   | 120  | -170  | 20   | O0 |
| ATOM 4506 CB ASP B 85     | -54.655 | 3.926  | 16.706 | 1.00 | 32.52 |      | C0 |

|                           |         |        |        |      |       |      |    |
|---------------------------|---------|--------|--------|------|-------|------|----|
| ANISOU 4506 CB ASP B 85   | 4140    | 4810   | 3410   | 140  | -200  | 110  | C0 |
| ATOM 4507 CG ASP B 85     | -55.993 | 4.638  | 16.851 | 1.00 | 33.49 |      | C0 |
| ANISOU 4507 CG ASP B 85   | 4250    | 4960   | 3510   | 280  | -250  | 120  | C0 |
| ATOM 4508 OD1 ASP B 85    | -57.034 | 3.944  | 16.781 | 1.00 | 33.44 |      | O0 |
| ANISOU 4508 OD1 ASP B 85  | 4110    | 5090   | 3510   | 320  | -300  | 80   | O0 |
| ATOM 4509 OD2 ASP B 85    | -55.987 | 5.878  | 17.036 | 1.00 | 33.16 |      | O0 |
| ANISOU 4509 OD2 ASP B 85  | 4330    | 4820   | 3450   | 360  | -230  | 170  | O0 |
| ATOM 4510 H ASP B 85      | -56.278 | 2.143  | 16.002 | 1.00 | 33.09 |      | H0 |
| ANISOU 4510 H ASP B 85    | 4010    | 5120   | 3450   | 150  | -300  | 10   | H0 |
| ATOM 4511 HA ASP B 85     | -53.755 | 2.101  | 17.082 | 1.00 | 31.50 |      | H0 |
| ANISOU 4511 HA ASP B 85   | 3910    | 4730   | 3330   | -20  | -160  | 30   | H0 |
| ATOM 4512 HB2 ASP B 85    | -53.983 | 4.424  | 17.214 | 1.00 | 32.42 |      | H0 |
| ANISOU 4512 HB2 ASP B 85  | 4190    | 4710   | 3420   | 100  | -160  | 130  | H0 |
| ATOM 4513 HB3 ASP B 85    | -54.400 | 3.946  | 15.762 | 1.00 | 33.01 |      | H0 |
| ANISOU 4513 HB3 ASP B 85  | 4250    | 4890   | 3410   | 140  | -210  | 140  | H0 |
| ATOM 4514 N LEU B 86      | -55.173 | 1.136  | 19.177 | 1.00 | 31.98 |      | N0 |
| ANISOU 4514 N LEU B 86    | 3800    | 4850   | 3500   | -30  | -170  | -70  | N0 |
| ATOM 4515 CA LEU B 86     | -55.599 | 0.868  | 20.575 | 1.00 | 32.24 |      | C0 |
| ANISOU 4515 CA LEU B 86   | 3780    | 4870   | 3600   | -30  | -140  | -100 | C0 |
| ATOM 4516 C LEU B 86      | -54.470 | 1.274  | 21.521 | 1.00 | 31.53 |      | C0 |
| ANISOU 4516 C LEU B 86    | 3770    | 4680   | 3540   | -70  | -100  | -90  | C0 |
| ATOM 4517 O LEU B 86      | -53.298 | 0.991  | 21.218 | 1.00 | 31.18 |      | O0 |
| ANISOU 4517 O LEU B 86    | 3760    | 4600   | 3490   | -150 | -80   | -80  | O0 |
| ATOM 4518 CB LEU B 86     | -55.955 | -0.612 | 20.744 | 1.00 | 32.30 |      | C0 |
| ANISOU 4518 CB LEU B 86   | 3690    | 4950   | 3630   | -110 | -140  | -150 | C0 |
| ATOM 4519 CG LEU B 86     | -57.071 | -1.120 | 19.835 | 1.00 | 33.45 |      | C0 |
| ANISOU 4519 CG LEU B 86   | 3740    | 5210   | 3750   | -110 | -200  | -180 | C0 |
| ATOM 4520 CD1 LEU B 86    | -57.434 | -2.557 | 20.171 | 1.00 | 33.51 |      | C0 |
| ANISOU 4520 CD1 LEU B 86  | 3670    | 5260   | 3800   | -210 | -190  | -230 | C0 |
| ATOM 4521 CD2 LEU B 86    | -58.294 | -0.224 | 19.926 | 1.00 | 34.87 |      | C0 |
| ANISOU 4521 CD2 LEU B 86  | 3850    | 5470   | 3930   | 10   | -230  | -150 | C0 |
| ATOM 4522 H LEU B 86      | -54.949 | 0.387  | 18.712 | 1.00 | 31.77 |      | H0 |
| ANISOU 4522 H LEU B 86    | 3750    | 4850   | 3470   | -70  | -170  | -90  | H0 |
| ATOM 4523 HA LEU B 86     | -56.388 | 1.421  | 20.769 | 1.00 | 32.70 |      | H0 |
| ANISOU 4523 HA LEU B 86   | 3820    | 4960   | 3650   | 40   | -150  | -90  | H0 |
| ATOM 4524 HB2 LEU B 86    | -55.151 | -1.143 | 20.576 | 1.00 | 31.84 |      | H0 |
| ANISOU 4524 HB2 LEU B 86  | 3660    | 4860   | 3580   | -170 | -120  | -160 | H0 |
| ATOM 4525 HB3 LEU B 86    | -56.219 | -0.761 | 21.674 | 1.00 | 32.16 |      | H0 |
| ANISOU 4525 HB3 LEU B 86  | 3640    | 4930   | 3650   | -120 | -110  | -170 | H0 |
| ATOM 4526 HG LEU B 86     | -56.742 | -1.097 | 18.904 | 1.00 | 33.63 |      | H0 |
| ANISOU 4526 HG LEU B 86   | 3800    | 5240   | 3730   | -110 | -230  | -170 | H0 |
| ATOM 4527 HD11 LEU B 86   | -56.644 | -3.119 | 20.089 | 1.00 | 32.98 |      | H0 |
| ANISOU 4527 HD11 LEU B 86 | 3660    | 5140   | 3730   | -270 | -170  | -240 | H0 |
| ATOM 4528 HD12 LEU B 86   | -58.120 | -2.871 | 19.558 | 1.00 | 34.15 |      | H0 |
| ANISOU 4528 HD12 LEU B 86 | 3700    | 5420   | 3860   | -230 | -240  | -250 | H0 |
| ATOM 4529 HD13 LEU B 86   | -57.769 | -2.602 | 21.084 | 1.00 | 33.42 |      | H0 |
| ANISOU 4529 HD13 LEU B 86 | 3620    | 5250   | 3830   | -210 | -150  | -230 | H0 |
| ATOM 4530 HD21 LEU B 86   | -58.445 | 0.027  | 20.854 | 1.00 | 34.61 |      | H0 |
| ANISOU 4530 HD21 LEU B 86 | 3810    | 5410   | 3930   | 30   | -190  | -150 | H0 |
| ATOM 4531 HD22 LEU B 86   | -59.072 | -0.700 | 19.589 | 1.00 | 35.34 |      | H0 |
| ANISOU 4531 HD22 LEU B 86 | 3820    | 5620   | 3990   | -10  | -270  | -170 | H0 |
| ATOM 4532 HD23 LEU B 86   | -58.150 | 0.578  | 19.394 | 1.00 | 35.01 |      | H0 |
| ANISOU 4532 HD23 LEU B 86 | 3930    | 5460   | 3910   | 70   | -250  | -120 | H0 |
| ATOM 4533 N ALA B 87      | -54.826 | 1.929  | 22.623 | 1.00 | 31.58 |      | N0 |

|                          |         |        |        |      |       |      |    |
|--------------------------|---------|--------|--------|------|-------|------|----|
| ANISOU 4533 N ALA B 87   | 3800    | 4640   | 3560   | -20  | -80   | -90  | N0 |
| ATOM 4534 CA ALA B 87    | -53.904 | 2.277  | 23.719 | 1.00 | 31.46 |      | C0 |
| ANISOU 4534 CA ALA B 87  | 3870    | 4530   | 3560   | -70  | -60   | -100 | C0 |
| ATOM 4535 C ALA B 87     | -54.546 | 1.869  | 25.046 | 1.00 | 32.05 |      | C0 |
| ANISOU 4535 C ALA B 87   | 3900    | 4620   | 3650   | -40  | -20   | -140 | C0 |
| ATOM 4536 O ALA B 87     | -55.785 | 2.024  | 25.195 | 1.00 | 32.65 |      | O0 |
| ANISOU 4536 O ALA B 87   | 3930    | 4750   | 3720   | 50   | -10   | -140 | O0 |
| ATOM 4537 CB ALA B 87    | -53.590 | 3.748  | 23.675 | 1.00 | 32.52 |      | C0 |
| ANISOU 4537 CB ALA B 87  | 4130    | 4550   | 3670   | -30  | -60   | -70  | C0 |
| ATOM 4538 H ALA B 87     | -55.675 | 2.219  | 22.779 | 1.00 | 32.13 |      | H0 |
| ANISOU 4538 H ALA B 87   | 3850    | 4740   | 3620   | 50   | -80   | -100 | H0 |
| ATOM 4539 HA ALA B 87    | -53.068 | 1.767  | 23.605 | 1.00 | 31.18 |      | H0 |
| ANISOU 4539 HA ALA B 87  | 3820    | 4490   | 3540   | -140 | -50   | -100 | H0 |
| ATOM 4540 HB1 ALA B 87   | -52.983 | 3.973  | 24.400 | 1.00 | 32.32 |      | H0 |
| ANISOU 4540 HB1 ALA B 87 | 4160    | 4470   | 3650   | -70  | -60   | -80  | H0 |
| ATOM 4541 HB2 ALA B 87   | -53.172 | 3.966  | 22.825 | 1.00 | 32.52 |      | H0 |
| ANISOU 4541 HB2 ALA B 87 | 4160    | 4540   | 3660   | -50  | -70   | -40  | H0 |
| ATOM 4542 HB3 ALA B 87   | -54.411 | 4.259  | 23.771 | 1.00 | 32.95 |      | H0 |
| ANISOU 4542 HB3 ALA B 87 | 4200    | 4610   | 3710   | 60   | -60   | -70  | H0 |
| ATOM 4543 N ALA B 88     | -53.738 | 1.339  | 25.964 | 1.00 | 31.72 |      | N0 |
| ANISOU 4543 N ALA B 88   | 3880    | 4550   | 3630   | -110 | -10   | -160 | N0 |
| ATOM 4544 CA ALA B 88    | -54.138 | 1.105  | 27.362 | 1.00 | 31.99 |      | C0 |
| ANISOU 4544 CA ALA B 88  | 3920    | 4580   | 3650   | -80  | 30    | -190 | C0 |
| ATOM 4545 C ALA B 88     | -53.967 | 2.435  | 28.099 | 1.00 | 33.41 |      | C0 |
| ANISOU 4545 C ALA B 88   | 4230    | 4660   | 3800   | -30  | 20    | -190 | C0 |
| ATOM 4546 O ALA B 88     | -52.814 | 2.863  | 28.314 | 1.00 | 33.29 |      | O0 |
| ANISOU 4546 O ALA B 88   | 4300    | 4570   | 3780   | -100 | -10   | -190 | O0 |
| ATOM 4547 CB ALA B 88    | -53.337 | -0.021 | 27.954 | 1.00 | 31.56 |      | C0 |
| ANISOU 4547 CB ALA B 88  | 3850    | 4530   | 3610   | -160 | 40    | -200 | C0 |
| ATOM 4548 H ALA B 88     | -52.878 | 1.087  | 25.796 | 1.00 | 31.40 |      | H0 |
| ANISOU 4548 H ALA B 88   | 3850    | 4490   | 3590   | -170 | -20   | -150 | H0 |
| ATOM 4549 HA ALA B 88    | -55.089 | 0.856  | 27.377 | 1.00 | 32.40 |      | H0 |
| ANISOU 4549 HA ALA B 88  | 3910    | 4690   | 3710   | -40  | 50    | -190 | H0 |
| ATOM 4550 HB1 ALA B 88   | -53.786 | -0.351 | 28.749 | 1.00 | 31.64 |      | H0 |
| ANISOU 4550 HB1 ALA B 88 | 3850    | 4550   | 3620   | -140 | 70    | -210 | H0 |
| ATOM 4551 HB2 ALA B 88   | -53.259 | -0.740 | 27.305 | 1.00 | 31.23 |      | H0 |
| ANISOU 4551 HB2 ALA B 88 | 3750    | 4530   | 3590   | -200 | 40    | -190 | H0 |
| ATOM 4552 HB3 ALA B 88   | -52.450 | 0.297  | 28.191 | 1.00 | 31.45 |      | H0 |
| ANISOU 4552 HB3 ALA B 88 | 3890    | 4470   | 3590   | -190 | 10    | -200 | H0 |
| ATOM 4553 N TYR B 89     | -55.084 | 3.091  | 28.410 | 1.00 | 35.10 |      | N0 |
| ANISOU 4553 N TYR B 89   | 4470    | 4880   | 3990   | 90   | 50    | -200 | N0 |
| ATOM 4554 CA TYR B 89    | -55.136 | 4.506  | 28.865 | 1.00 | 36.88 |      | C0 |
| ANISOU 4554 CA TYR B 89  | 4850    | 4990   | 4170   | 170  | 50    | -200 | C0 |
| ATOM 4555 C TYR B 89     | -54.291 | 4.701  | 30.130 | 1.00 | 36.58 |      | C0 |
| ANISOU 4555 C TYR B 89   | 4930    | 4860   | 4100   | 120  | 40    | -240 | C0 |
| ATOM 4556 O TYR B 89     | -53.632 | 5.755  | 30.226 | 1.00 | 36.80 |      | O0 |
| ANISOU 4556 O TYR B 89   | 5110    | 4770   | 4100   | 90   | 0     | -250 | O0 |
| ATOM 4557 CB TYR B 89    | -56.596 | 4.952  | 29.004 | 1.00 | 39.17 |      | C0 |
| ANISOU 4557 CB TYR B 89  | 5110    | 5330   | 4440   | 340  | 100   | -200 | C0 |
| ATOM 4558 CG TYR B 89    | -57.355 | 5.011  | 27.698 | 1.00 | 40.22 |      | C0 |
| ANISOU 4558 CG TYR B 89  | 5140    | 5550   | 4590   | 400  | 80    | -160 | C0 |
| ATOM 4559 CD1 TYR B 89   | -56.687 | 5.129  | 26.489 | 1.00 | 41.01 |      | C0 |
| ANISOU 4559 CD1 TYR B 89 | 5260    | 5620   | 4700   | 330  | 20    | -130 | C0 |
| ATOM 4560 CD2 TYR B 89   | -58.742 | 5.006  | 27.661 | 1.00 | 42.41 |      | C0 |

|                           |         |       |        |      |       |      |    |
|---------------------------|---------|-------|--------|------|-------|------|----|
| ANISOU 4560 CD2 TYR B 89  | 5310    | 5940  | 4870   | 540  | 110   | -140 | C0 |
| ATOM 4561 CE1 TYR B 89    | -57.364 | 5.198 | 25.284 | 1.00 | 42.28 |      | C0 |
| ANISOU 4561 CE1 TYR B 89  | 5340    | 5860  | 4860   | 390  | -10   | -90  | C0 |
| ATOM 4562 CE2 TYR B 89    | -59.437 | 5.079 | 26.462 | 1.00 | 43.65 |      | C0 |
| ANISOU 4562 CE2 TYR B 89  | 5360    | 6190  | 5030   | 600  | 70    | -110 | C0 |
| ATOM 4563 CZ TYR B 89     | -58.744 | 5.167 | 25.265 | 1.00 | 43.28 |      | C0 |
| ANISOU 4563 CZ TYR B 89   | 5350    | 6110  | 4980   | 530  | 10    | -80  | C0 |
| ATOM 4564 OH TYR B 89     | -59.383 | 5.247 | 24.058 | 1.00 | 45.75 |      | O0 |
| ANISOU 4564 OH TYR B 89   | 5590    | 6510  | 5280   | 590  | -40   | -50  | O0 |
| ATOM 4565 H TYR B 89      | -55.909 | 2.707 | 28.374 | 1.00 | 35.24 |      | H0 |
| ANISOU 4565 H TYR B 89    | 4400    | 4970  | 4020   | 130  | 80    | -190 | H0 |
| ATOM 4566 HA TYR B 89     | -54.721 | 5.059 | 28.158 | 1.00 | 37.00 |      | H0 |
| ANISOU 4566 HA TYR B 89   | 4910    | 4950  | 4190   | 150  | 10    | -180 | H0 |
| ATOM 4567 HB2 TYR B 89    | -57.054 | 4.333 | 29.611 | 1.00 | 38.99 |      | H0 |
| ANISOU 4567 HB2 TYR B 89  | 5020    | 5370  | 4420   | 350  | 140   | -210 | H0 |
| ATOM 4568 HB3 TYR B 89    | -56.608 | 5.840 | 29.416 | 1.00 | 39.75 |      | H0 |
| ANISOU 4568 HB3 TYR B 89  | 5310    | 5310  | 4480   | 410  | 100   | -210 | H0 |
| ATOM 4569 HD1 TYR B 89    | -55.747 | 5.142 | 26.479 | 1.00 | 40.52 |      | H0 |
| ANISOU 4569 HD1 TYR B 89  | 5250    | 5490  | 4650   | 240  | 0     | -130 | H0 |
| ATOM 4570 HD2 TYR B 89    | -59.224 | 4.937 | 28.469 | 1.00 | 42.70 |      | H0 |
| ANISOU 4570 HD2 TYR B 89  | 5330    | 6000  | 4900   | 590  | 160   | -160 | H0 |
| ATOM 4571 HE1 TYR B 89    | -56.884 | 5.263 | 24.475 | 1.00 | 41.87 |      | H0 |
| ANISOU 4571 HE1 TYR B 89  | 5310    | 5790  | 4800   | 350  | -40   | -70  | H0 |
| ATOM 4572 HE2 TYR B 89    | -60.380 | 5.057 | 26.460 | 1.00 | 44.18 |      | H0 |
| ANISOU 4572 HE2 TYR B 89  | 5330    | 6350  | 5100   | 690  | 90    | -100 | H0 |
| ATOM 4573 N ASN B 90      | -54.247 | 3.708 | 31.026 | 1.00 | 35.74 |      | N0 |
| ANISOU 4573 N ASN B 90    | 4770    | 4820  | 3990   | 90   | 60    | -260 | N0 |
| ATOM 4574 CA ASN B 90     | -53.557 | 3.815 | 32.341 | 1.00 | 35.77 |      | C0 |
| ANISOU 4574 CA ASN B 90   | 4890    | 4760  | 3940   | 60   | 50    | -300 | C0 |
| ATOM 4575 C ASN B 90      | -52.238 | 3.031 | 32.316 | 1.00 | 34.59 |      | C0 |
| ANISOU 4575 C ASN B 90    | 4690    | 4630  | 3820   | -70  | -10   | -300 | C0 |
| ATOM 4576 O ASN B 90      | -51.684 | 2.766 | 33.399 | 1.00 | 33.61 |      | O0 |
| ANISOU 4576 O ASN B 90    | 4630    | 4490  | 3650   | -100 | -30   | -320 | O0 |
| ATOM 4577 CB ASN B 90     | -54.472 | 3.385 | 33.496 | 1.00 | 36.52 |      | C0 |
| ANISOU 4577 CB ASN B 90   | 4990    | 4900  | 3990   | 160  | 130   | -320 | C0 |
| ATOM 4578 CG ASN B 90     | -54.981 | 1.964 | 33.364 | 1.00 | 36.41 |      | C0 |
| ANISOU 4578 CG ASN B 90   | 4810    | 5000  | 4020   | 130  | 180   | -290 | C0 |
| ATOM 4579 OD1 ASN B 90    | -55.423 | 1.557 | 32.293 | 1.00 | 35.28 |      | O0 |
| ANISOU 4579 OD1 ASN B 90  | 4540    | 4930  | 3940   | 110  | 190   | -260 | O0 |
| ATOM 4580 ND2 ASN B 90    | -54.940 | 1.210 | 34.452 | 1.00 | 37.28 |      | N0 |
| ANISOU 4580 ND2 ASN B 90  | 4940    | 5130  | 4090   | 130  | 220   | -290 | N0 |
| ATOM 4581 H ASN B 90      | -54.639 | 2.899 | 30.882 | 1.00 | 35.41 |      | H0 |
| ANISOU 4581 H ASN B 90    | 4630    | 4850  | 3970   | 90   | 90    | -250 | H0 |
| ATOM 4582 HA ASN B 90     | -53.339 | 4.765 | 32.488 | 1.00 | 36.42 |      | H0 |
| ANISOU 4582 HA ASN B 90   | 5090    | 4750  | 4000   | 70   | 20    | -320 | H0 |
| ATOM 4583 HB2 ASN B 90    | -53.980 | 3.471 | 34.336 | 1.00 | 36.84 |      | H0 |
| ANISOU 4583 HB2 ASN B 90  | 5120    | 4900  | 3980   | 140  | 110   | -340 | H0 |
| ATOM 4584 HB3 ASN B 90    | -55.238 | 3.993 | 33.532 | 1.00 | 37.25 |      | H0 |
| ANISOU 4584 HB3 ASN B 90  | 5110    | 4980  | 4060   | 250  | 160   | -320 | H0 |
| ATOM 4585 HD21 ASN B 90   | -54.757 | 0.347 | 34.385 | 1.00 | 36.60 |      | H0 |
| ANISOU 4585 HD21 ASN B 90 | 4790    | 5090  | 4030   | 70   | 230   | -280 | H0 |
| ATOM 4586 HD22 ASN B 90   | -55.097 | 1.568 | 35.245 | 1.00 | 37.62 |      | H0 |
| ANISOU 4586 HD22 ASN B 90 | 5070    | 5150  | 4080   | 180  | 240   | -310 | H0 |
| ATOM 4587 N ALA B 91      | -51.728 | 2.683 | 31.132 | 1.00 | 34.05 |      | N0 |

|                           |         |       |        |      |       |      |    |
|---------------------------|---------|-------|--------|------|-------|------|----|
| ANISOU 4587 N ALA B 91    | 4530    | 4590  | 3810   | -140 | -30   | -260 | N0 |
| ATOM 4588 CA ALA B 91     | -50.359 | 2.138 | 30.970 | 1.00 | 33.72 |      | C0 |
| ANISOU 4588 CA ALA B 91   | 4440    | 4580  | 3790   | -260 | -90   | -250 | C0 |
| ATOM 4589 C ALA B 91      | -49.337 | 3.233 | 31.305 | 1.00 | 34.27 |      | C0 |
| ANISOU 4589 C ALA B 91    | 4620    | 4560  | 3840   | -330 | -160  | -270 | C0 |
| ATOM 4590 O ALA B 91      | -49.598 | 4.411 | 30.986 | 1.00 | 34.93 |      | O0 |
| ANISOU 4590 O ALA B 91    | 4800    | 4560  | 3920   | -320 | -160  | -270 | O0 |
| ATOM 4591 CB ALA B 91     | -50.154 | 1.604 | 29.574 | 1.00 | 33.77 |      | C0 |
| ANISOU 4591 CB ALA B 91   | 4340    | 4640  | 3850   | -290 | -80   | -210 | C0 |
| ATOM 4592 H ALA B 91      | -52.176 | 2.750 | 30.343 | 1.00 | 33.93 |      | H0 |
| ANISOU 4592 H ALA B 91    | 4470    | 4600  | 3820   | -120 | -20   | -240 | H0 |
| ATOM 4593 HA ALA B 91     | -50.242 | 1.398 | 31.611 | 1.00 | 33.62 |      | H0 |
| ANISOU 4593 HA ALA B 91   | 4410    | 4600  | 3770   | -250 | -80   | -260 | H0 |
| ATOM 4594 HB1 ALA B 91    | -49.232 | 1.314 | 29.470 | 1.00 | 33.47 |      | H0 |
| ANISOU 4594 HB1 ALA B 91  | 4270    | 4620  | 3830   | -350 | -100  | -200 | H0 |
| ATOM 4595 HB2 ALA B 91    | -50.747 | 0.850 | 29.424 | 1.00 | 33.21 |      | H0 |
| ANISOU 4595 HB2 ALA B 91  | 4210    | 4620  | 3790   | -260 | -40   | -210 | H0 |
| ATOM 4596 HB3 ALA B 91    | -50.347 | 2.302 | 28.926 | 1.00 | 33.78 |      | H0 |
| ANISOU 4596 HB3 ALA B 91  | 4370    | 4610  | 3860   | -280 | -80   | -200 | H0 |
| ATOM 4597 N ILE B 92      | -48.229 | 2.860 | 31.949 | 1.00 | 34.09 |      | N0 |
| ANISOU 4597 N ILE B 92    | 4580    | 4570  | 3810   | -410 | -220  | -280 | N0 |
| ATOM 4598 CA ILE B 92     | -47.115 | 3.792 | 32.303 | 1.00 | 35.58 |      | C0 |
| ANISOU 4598 CA ILE B 92   | 4840    | 4700  | 3990   | -520 | -300  | -290 | C0 |
| ATOM 4599 C ILE B 92      | -45.817 | 3.352 | 31.608 | 1.00 | 35.53 |      | C0 |
| ANISOU 4599 C ILE B 92    | 4690    | 4780  | 4040   | -630 | -340  | -250 | C0 |
| ATOM 4600 O ILE B 92      | -44.798 | 4.007 | 31.817 | 1.00 | 36.52 |      | O0 |
| ANISOU 4600 O ILE B 92    | 4830    | 4890  | 4170   | -750 | -420  | -260 | O0 |
| ATOM 4601 CB ILE B 92     | -46.971 | 3.923 | 33.837 | 1.00 | 35.84 |      | C0 |
| ANISOU 4601 CB ILE B 92   | 4980    | 4700  | 3940   | -510 | -360  | -350 | C0 |
| ATOM 4602 CG1 ILE B 92    | -46.697 | 2.592 | 34.538 | 1.00 | 35.21 |      | C0 |
| ANISOU 4602 CG1 ILE B 92  | 4810    | 4730  | 3840   | -470 | -360  | -340 | C0 |
| ATOM 4603 CG2 ILE B 92    | -48.205 | 4.603 | 34.411 | 1.00 | 36.57 |      | C0 |
| ANISOU 4603 CG2 ILE B 92  | 5220    | 4700  | 3970   | -400 | -310  | -390 | C0 |
| ATOM 4604 CD1 ILE B 92    | -46.306 | 2.742 | 36.001 | 1.00 | 36.77 |      | C0 |
| ANISOU 4604 CD1 ILE B 92  | 5120    | 4910  | 3940   | -470 | -440  | -390 | C0 |
| ATOM 4605 H ILE B 92      | -48.091 | 2.004 | 32.229 | 1.00 | 33.95 |      | H0 |
| ANISOU 4605 H ILE B 92    | 4500    | 4610  | 3790   | -400 | -210  | -270 | H0 |
| ATOM 4606 HA ILE B 92     | -47.347 | 4.672 | 31.957 | 1.00 | 35.81 |      | H0 |
| ANISOU 4606 HA ILE B 92   | 4940    | 4650  | 4010   | -530 | -300  | -300 | H0 |
| ATOM 4607 HB ILE B 92     | -46.198 | 4.513 | 34.012 | 1.00 | 36.74 |      | H0 |
| ANISOU 4607 HB ILE B 92   | 5130    | 4790  | 4050   | -600 | -430  | -370 | H0 |
| ATOM 4608 HG12 ILE B 92   | -47.502 | 2.034 | 34.483 | 1.00 | 34.80 |      | H0 |
| ANISOU 4608 HG12 ILE B 92 | 4740    | 4700  | 3780   | -390 | -290  | -330 | H0 |
| ATOM 4609 HG13 ILE B 92   | -45.975 | 2.126 | 34.065 | 1.00 | 35.17 |      | H0 |
| ANISOU 4609 HG13 ILE B 92 | 4700    | 4790  | 3870   | -520 | -380  | -310 | H0 |
| ATOM 4610 HG21 ILE B 92   | -48.361 | 5.443 | 33.945 | 1.00 | 36.85 |      | H0 |
| ANISOU 4610 HG21 ILE B 92 | 5330    | 4660  | 4010   | -410 | -310  | -390 | H0 |
| ATOM 4611 HG22 ILE B 92   | -48.071 | 4.780 | 35.357 | 1.00 | 37.11 |      | H0 |
| ANISOU 4611 HG22 ILE B 92 | 5380    | 4740  | 3970   | -390 | -340  | -430 | H0 |
| ATOM 4612 HG23 ILE B 92   | -48.979 | 4.024 | 34.298 | 1.00 | 35.86 |      | H0 |
| ANISOU 4612 HG23 ILE B 92 | 5080    | 4660  | 3890   | -310 | -240  | -380 | H0 |
| ATOM 4613 HD11 ILE B 92   | -45.625 | 3.432 | 36.086 | 1.00 | 37.37 |      | H0 |
| ANISOU 4613 HD11 ILE B 92 | 5230    | 4960  | 4010   | -560 | -510  | -410 | H0 |
| ATOM 4614 HD12 ILE B 92   | -45.953 | 1.899 | 36.333 | 1.00 | 36.44 |      | H0 |



|                           |         |        |        |      |       |      |    |
|---------------------------|---------|--------|--------|------|-------|------|----|
| ANISOU 4614 HD12 ILE B 92 | 5010    | 4950   | 3890   | -460 | -450  | -370 | H0 |
| ATOM 4615 HD13 ILE B 92   | -47.087 | 2.993  | 36.523 | 1.00 | 36.78 |      | H0 |
| ANISOU 4615 HD13 ILE B 92 | 5220    | 4870   | 3890   | -400 | -400  | -420 | H0 |
| ATOM 4616 N SER B 93      | -45.865 | 2.298  | 30.791 | 1.00 | 36.28 |      | N0 |
| ANISOU 4616 N SER B 93    | 4650    | 4960   | 4170   | -590 | -280  | -210 | N0 |
| ATOM 4617 CA SER B 93     | -44.754 | 1.824  | 29.925 | 1.00 | 37.26 |      | C0 |
| ANISOU 4617 CA SER B 93   | 4640    | 5170   | 4340   | -650 | -290  | -160 | C0 |
| ATOM 4618 C SER B 93      | -45.310 | 1.535  | 28.529 | 1.00 | 37.58 |      | C0 |
| ANISOU 4618 C SER B 93    | 4640    | 5230   | 4410   | -610 | -210  | -130 | C0 |
| ATOM 4619 O SER B 93      | -46.497 | 1.196  | 28.428 | 1.00 | 38.28 |      | O0 |
| ANISOU 4619 O SER B 93    | 4760    | 5300   | 4490   | -530 | -160  | -140 | O0 |
| ATOM 4620 CB SER B 93     | -44.083 | 0.602  | 30.506 | 1.00 | 36.97 |      | C0 |
| ANISOU 4620 CB SER B 93   | 4510    | 5240   | 4300   | -620 | -300  | -150 | C0 |
| ATOM 4621 OG SER B 93     | -44.837 | -0.572 | 30.223 | 1.00 | 36.23 |      | O0 |
| ANISOU 4621 OG SER B 93   | 4390    | 5170   | 4210   | -520 | -230  | -150 | O0 |
| ATOM 4622 H SER B 93      | -46.604 | 1.774  | 30.705 | 1.00 | 35.52 |      | H0 |
| ANISOU 4622 H SER B 93    | 4550    | 4880   | 4070   | -520 | -240  | -210 | H0 |
| ATOM 4623 HA SER B 93     | -44.081 | 2.553  | 29.850 | 1.00 | 37.95 |      | H0 |
| ANISOU 4623 HA SER B 93   | 4730    | 5240   | 4440   | -740 | -330  | -150 | H0 |
| ATOM 4624 HB2 SER B 93    | -43.180 | 0.513  | 30.126 | 1.00 | 37.44 |      | H0 |
| ANISOU 4624 HB2 SER B 93  | 4480    | 5360   | 4390   | -670 | -320  | -120 | H0 |
| ATOM 4625 HB3 SER B 93    | -43.996 | 0.710  | 31.481 | 1.00 | 37.45 |      | H0 |
| ANISOU 4625 HB3 SER B 93  | 4620    | 5290   | 4330   | -620 | -350  | -180 | H0 |
| ATOM 4626 N LYS B 94      | -44.487 | 1.677  | 27.490 | 1.00 | 39.69 |      | N0 |
| ANISOU 4626 N LYS B 94    | 4830    | 5530   | 4710   | -680 | -190  | -80  | N0 |
| ATOM 4627 CA LYS B 94     | -44.837 | 1.231  | 26.116 | 1.00 | 39.74 |      | C0 |
| ANISOU 4627 CA LYS B 94   | 4800    | 5570   | 4730   | -630 | -120  | -40  | C0 |
| ATOM 4628 C LYS B 94      | -45.085 | -0.272 | 26.179 | 1.00 | 37.73 |      | C0 |
| ANISOU 4628 C LYS B 94    | 4480    | 5390   | 4470   | -550 | -90   | -60  | C0 |
| ATOM 4629 O LYS B 94      | -44.427 | -0.972 | 26.947 | 1.00 | 36.34 |      | O0 |
| ANISOU 4629 O LYS B 94    | 4260    | 5260   | 4290   | -540 | -110  | -60  | O0 |
| ATOM 4630 CB LYS B 94     | -43.729 | 1.590  | 25.118 | 1.00 | 41.85 |      | C0 |
| ANISOU 4630 CB LYS B 94   | 5000    | 5890   | 5020   | -710 | -100  | 10   | C0 |
| ATOM 4631 CG LYS B 94     | -43.581 | 3.081  | 24.838 | 1.00 | 44.81 |      | C0 |
| ANISOU 4631 CG LYS B 94   | 5460    | 6170   | 5400   | -810 | -120  | 40   | C0 |
| ATOM 4632 CD LYS B 94     | -42.413 | 3.451  | 23.929 | 1.00 | 46.80 |      | C0 |
| ANISOU 4632 CD LYS B 94   | 5630    | 6470   | 5680   | -920 | -80   | 110  | C0 |
| ATOM 4633 CE LYS B 94     | -42.749 | 3.380  | 22.452 | 1.00 | 47.95 |      | C0 |
| ANISOU 4633 CE LYS B 94   | 5790    | 6630   | 5800   | -870 | 0     | 160  | C0 |
| ATOM 4634 NZ LYS B 94     | -41.820 | 4.198  | 21.634 | 1.00 | 50.28 |      | N0 |
| ANISOU 4634 NZ LYS B 94   | 6070    | 6930   | 6110   | -990 | 50    | 240  | N0 |
| ATOM 4635 H LYS B 94      | -43.661 | 2.055  | 27.562 | 1.00 | 40.05 |      | H0 |
| ANISOU 4635 H LYS B 94    | 4850    | 5590   | 4770   | -750 | -220  | -60  | H0 |
| ATOM 4636 HA LYS B 94     | -45.669 | 1.683  | 25.847 | 1.00 | 39.49 |      | H0 |
| ANISOU 4636 HA LYS B 94   | 4830    | 5490   | 4680   | -600 | -110  | -50  | H0 |
| ATOM 4637 HB2 LYS B 94    | -42.877 | 1.251  | 25.465 | 1.00 | 42.33 |      | H0 |
| ANISOU 4637 HB2 LYS B 94  | 4980    | 6010   | 5100   | -750 | -120  | 20   | H0 |
| ATOM 4638 HB3 LYS B 94    | -43.912 | 1.130  | 24.272 | 1.00 | 41.69 |      | H0 |
| ANISOU 4638 HB3 LYS B 94  | 4950    | 5900   | 4990   | -670 | -50   | 30   | H0 |
| ATOM 4639 HG2 LYS B 94    | -44.413 | 3.402  | 24.431 | 1.00 | 44.29 |      | H0 |
| ANISOU 4639 HG2 LYS B 94  | 5470    | 6050   | 5310   | -770 | -100  | 40   | H0 |
| ATOM 4640 HG3 LYS B 94    | -43.472 | 3.548  | 25.694 | 1.00 | 44.90 |      | H0 |
| ANISOU 4640 HG3 LYS B 94  | 5510    | 6140   | 5410   | -860 | -170  | 10   | H0 |
| ATOM 4641 HD2 LYS B 94    | -42.121 | 4.362  | 24.142 | 1.00 | 47.66 |      | H0 |

|             |              |         |        |        |       |       |      |    |
|-------------|--------------|---------|--------|--------|-------|-------|------|----|
| ANISOU 4641 | HD2 LYS B 94 | 5790    | 6520   | 5800   | -1020 | -110  | 120  | H0 |
| ATOM 4642   | HD3 LYS B 94 | -41.664 | 2.845  | 24.112 | 1.00  | 47.01 |      | H0 |
| ANISOU 4642 | HD3 LYS B 94 | 5550    | 6590   | 5720   | -930  | -80   | 120  | H0 |
| ATOM 4643   | HE2 LYS B 94 | -42.700 | 2.452  | 22.152 | 1.00  | 47.41 |      | H0 |
| ANISOU 4643 | HE2 LYS B 94 | 5660    | 6640   | 5720   | -810  | 30    | 160  | H0 |
| ATOM 4644   | HE3 LYS B 94 | -43.660 | 3.695  | 22.306 | 1.00  | 47.52 |      | H0 |
| ANISOU 4644 | HE3 LYS B 94 | 5830    | 6500   | 5720   | -820  | 0     | 150  | H0 |
| ATOM 4645   | HZ1 LYS B 94 | -41.894 | 5.072  | 21.866 | 1.00  | 50.48 |      | H0 |
| ANISOU 4645 | HZ1 LYS B 94 | 6180    | 6860   | 6140   | -1060 | 20    | 240  | H0 |
| ATOM 4646   | HZ2 LYS B 94 | -42.022 | 4.106  | 20.755 | 1.00  | 49.91 |      | H0 |
| ANISOU 4646 | HZ2 LYS B 94 | 6040    | 6890   | 6030   | -950  | 100   | 270  | H0 |
| ATOM 4647   | HZ3 LYS B 94 | -40.966 | 3.925  | 21.773 | 1.00  | 50.40 |      | H0 |
| ANISOU 4647 | HZ3 LYS B 94 | 5980    | 7020   | 6150   | -1040 | 50    | 260  | H0 |
| ATOM 4648   | N PROB 95    | -46.042 | -0.815 | 25.394 | 1.00  | 36.16 |      | N0 |
| ANISOU 4648 | N PROB 95    | 4300    | 5190   | 4260   | -480  | -40   | -70  | N0 |
| ATOM 4649   | CA PROB 95   | -46.256 | -2.258 | 25.359 | 1.00  | 35.43 |      | C0 |
| ANISOU 4649 | CA PROB 95   | 4170    | 5130   | 4160   | -420  | -10   | -80  | C0 |
| ATOM 4650   | C PROB 95    | -44.969 | -2.964 | 24.896 | 1.00  | 35.42 |      | C0 |
| ANISOU 4650 | C PROB 95    | 4090    | 5200   | 4160   | -420  | 10    | -50  | C0 |
| ATOM 4651   | O PROB 95    | -44.351 | -2.502 | 23.959 | 1.00  | 36.42 |      | O0 |
| ANISOU 4651 | O PROB 95    | 4190    | 5360   | 4290   | -450  | 40    | -20  | O0 |
| ATOM 4652   | CB PROB 95   | -47.446 | -2.467 | 24.407 | 1.00  | 35.25 |      | C0 |
| ANISOU 4652 | CB PROB 95   | 4170    | 5100   | 4120   | -390  | 20    | -100 | C0 |
| ATOM 4653   | CG PROB 95   | -47.660 | -1.143 | 23.693 | 1.00  | 35.71 |      | C0 |
| ANISOU 4653 | CG PROB 95   | 4270    | 5130   | 4170   | -410  | 0     | -70  | C0 |
| ATOM 4654   | CD PROB 95   | -46.954 | -0.078 | 24.509 | 1.00  | 36.61 |      | C0 |
| ANISOU 4654 | CD PROB 95   | 4410    | 5200   | 4300   | -470  | -30   | -60  | C0 |
| ATOM 4655   | HA PROB 95   | -46.505 | -2.571 | 26.264 | 1.00  | 35.31 |      | H0 |
| ANISOU 4655 | HA PROB 95   | 4170    | 5100   | 4140   | -410  | -20   | -100 | H0 |
| ATOM 4656   | HB2 PROB 95  | -47.251 | -3.178 | 23.759 | 1.00  | 35.26 |      | H0 |
| ANISOU 4656 | HB2 PROB 95  | 4160    | 5130   | 4110   | -380  | 40    | -100 | H0 |
| ATOM 4657   | HB3 PROB 95  | -48.250 | -2.718 | 24.910 | 1.00  | 35.04 |      | H0 |
| ANISOU 4657 | HB3 PROB 95  | 4160    | 5060   | 4090   | -370  | 10    | -120 | H0 |
| ATOM 4658   | HG2 PROB 95  | -47.288 | -1.180 | 22.788 | 1.00  | 35.98 |      | H0 |
| ANISOU 4658 | HG2 PROB 95  | 4290    | 5190   | 4190   | -420  | 20    | -50  | H0 |
| ATOM 4659   | HG3 PROB 95  | -48.616 | -0.943 | 23.627 | 1.00  | 35.72 |      | H0 |
| ANISOU 4659 | HG3 PROB 95  | 4290    | 5120   | 4160   | -390  | -10   | -90  | H0 |
| ATOM 4660   | HD2 PROB 95  | -46.458 | 0.528  | 23.929 | 1.00  | 36.80 |      | H0 |
| ANISOU 4660 | HD2 PROB 95  | 4440    | 5220   | 4330   | -510  | -30   | -30  | H0 |
| ATOM 4661   | HD3 PROB 95  | -47.595 | 0.441  | 25.029 | 1.00  | 36.41 |      | H0 |
| ANISOU 4661 | HD3 PROB 95  | 4430    | 5130   | 4270   | -450  | -50   | -80  | H0 |
| ATOM 4662   | N GLU B 96   | -44.549 | -4.000 | 25.625 | 1.00  | 34.47 |      | N0 |
| ANISOU 4662 | N GLU B 96   | 3950    | 5110   | 4040   | -370  | 20    | -60  | N0 |
| ATOM 4663   | CA GLU B 96  | -43.417 | -4.882 | 25.251 | 1.00  | 35.12 |      | C0 |
| ANISOU 4663 | CA GLU B 96  | 3960    | 5260   | 4120   | -320  | 50    | -30  | C0 |
| ATOM 4664   | C GLU B 96   | -44.015 | -6.102 | 24.539 | 1.00  | 33.42 |      | C0 |
| ANISOU 4664 | C GLU B 96   | 3810    | 5020   | 3880   | -250  | 110   | -50  | C0 |
| ATOM 4665   | O GLU B 96   | -44.518 | -7.009 | 25.239 | 1.00  | 32.06 |      | O0 |
| ANISOU 4665 | O GLU B 96   | 3690    | 4800   | 3700   | -210  | 120   | -80  | O0 |
| ATOM 4666   | CB GLU B 96  | -42.579 | -5.250 | 26.480 | 1.00  | 36.19 |      | C0 |
| ANISOU 4666 | CB GLU B 96  | 4060    | 5440   | 4260   | -290  | 10    | -10  | C0 |
| ATOM 4667   | CG GLU B 96  | -41.321 | -6.038 | 26.146 | 1.00  | 38.42 |      | C0 |
| ANISOU 4667 | CG GLU B 96  | 4240    | 5820   | 4540   | -220  | 40    | 30   | C0 |
| ATOM 4668   | CD GLU B 96  | -40.435 | -6.405 | 27.332 | 1.00  | 41.00 |      | C0 |

|             |               |         |         |        |      |       |      |    |
|-------------|---------------|---------|---------|--------|------|-------|------|----|
| ANISOU 4668 | CD GLU B 96   | 4510    | 6210    | 4860   | -170 | -20   | 50   | C0 |
| ATOM 4669   | OE1 GLU B 96  | -39.459 | -7.174  | 27.127 | 1.00 | 42.28 |      | O0 |
| ANISOU 4669 | OE1 GLU B 96  | 4590    | 6460    | 5010   | -70  | 10    | 90   | O0 |
| ATOM 4670   | OE2 GLU B 96  | -40.704 | -5.911  | 28.456 | 1.00 | 41.43 |      | O0 |
| ANISOU 4670 | OE2 GLU B 96  | 4600    | 6240    | 4900   | -210 | -90   | 30   | O0 |
| ATOM 4671   | H GLU B 96    | -44.944 | -4.232  | 26.413 | 1.00 | 34.56 |      | H0 |
| ANISOU 4671 | H GLU B 96    | 4000    | 5090    | 4040   | -360 | 0     | -80  | H0 |
| ATOM 4672   | HA GLU B 96   | -42.842 | -4.398  | 24.615 | 1.00 | 35.28 |      | H0 |
| ANISOU 4672 | HA GLU B 96   | 3940    | 5320    | 4150   | -350 | 60    | 0    | H0 |
| ATOM 4673   | HB2 GLU B 96  | -42.325 | -4.425  | 26.944 | 1.00 | 36.60 |      | H0 |
| ANISOU 4673 | HB2 GLU B 96  | 4090    | 5500    | 4320   | -350 | -40   | -10  | H0 |
| ATOM 4674   | HB3 GLU B 96  | -43.131 | -5.780  | 27.090 | 1.00 | 36.06 |      | H0 |
| ANISOU 4674 | HB3 GLU B 96  | 4100    | 5380    | 4220   | -260 | 10    | -40  | H0 |
| ATOM 4675   | HG2 GLU B 96  | -41.580 | -6.868  | 25.692 | 1.00 | 38.37 |      | H0 |
| ANISOU 4675 | HG2 GLU B 96  | 4280    | 5790    | 4510   | -150 | 90    | 20   | H0 |
| ATOM 4676   | HG3 GLU B 96  | -40.783 | -5.516  | 25.514 | 1.00 | 38.89 |      | H0 |
| ANISOU 4676 | HG3 GLU B 96  | 4240    | 5930    | 4610   | -260 | 50    | 50   | H0 |
| ATOM 4677   | N VAL B 97    | -43.982 | -6.105  | 23.202 | 1.00 | 31.87 |      | N0 |
| ANISOU 4677 | N VAL B 97    | 3610    | 4840    | 3660   | -250 | 160   | -50  | N0 |
| ATOM 4678   | CA VAL B 97   | -44.559 | -7.196  | 22.361 | 1.00 | 31.71 |      | C0 |
| ANISOU 4678 | CA VAL B 97   | 3660    | 4780    | 3600   | -200 | 200   | -80  | C0 |
| ATOM 4679   | C VAL B 97    | -43.589 | -8.380  | 22.369 | 1.00 | 31.53 |      | C0 |
| ANISOU 4679 | C VAL B 97    | 3640    | 4780    | 3560   | -100 | 250   | -70  | C0 |
| ATOM 4680   | O VAL B 97    | -42.473 | -8.231  | 21.853 | 1.00 | 33.01 |      | O0 |
| ANISOU 4680 | O VAL B 97    | 3750    | 5050    | 3740   | -60  | 290   | -30  | O0 |
| ATOM 4681   | CB VAL B 97   | -44.862 | -6.731  | 20.925 | 1.00 | 32.18 |      | C0 |
| ANISOU 4681 | CB VAL B 97   | 3750    | 4850    | 3630   | -220 | 220   | -90  | C0 |
| ATOM 4682   | CG1 VAL B 97  | -45.492 | -7.852  | 20.108 | 1.00 | 32.51 |      | C0 |
| ANISOU 4682 | CG1 VAL B 97  | 3880    | 4860    | 3620   | -180 | 250   | -140 | C0 |
| ATOM 4683   | CG2 VAL B 97  | -45.748 | -5.492  | 20.904 | 1.00 | 32.11 |      | C0 |
| ANISOU 4683 | CG2 VAL B 97  | 3740    | 4830    | 3630   | -290 | 170   | -80  | C0 |
| ATOM 4684   | H VAL B 97    | -43.591 | -5.440  | 22.719 | 1.00 | 32.47 |      | H0 |
| ANISOU 4684 | H VAL B 97    | 3650    | 4940    | 3740   | -280 | 160   | -20  | H0 |
| ATOM 4685   | HA VAL B 97   | -45.395 | -7.482  | 22.771 | 1.00 | 31.31 |      | H0 |
| ANISOU 4685 | HA VAL B 97   | 3660    | 4680    | 3560   | -210 | 180   | -110 | H0 |
| ATOM 4686   | HB VAL B 97   | -44.000 | -6.494  | 20.501 | 1.00 | 32.66 |      | H0 |
| ANISOU 4686 | HB VAL B 97   | 3760    | 4970    | 3680   | -200 | 250   | -50  | H0 |
| ATOM 4687   | HG11 VAL B 97 | -44.794 | -8.441  | 19.770 | 1.00 | 32.99 |      | H0 |
| ANISOU 4687 | HG11 VAL B 97 | 3950    | 4930    | 3650   | -120 | 300   | -130 | H0 |
| ATOM 4688   | HG12 VAL B 97 | -45.984 | -7.474  | 19.362 | 1.00 | 32.53 |      | H0 |
| ANISOU 4688 | HG12 VAL B 97 | 3900    | 4860    | 3590   | -200 | 240   | -150 | H0 |
| ATOM 4689   | HG13 VAL B 97 | -46.100 | -8.362  | 20.671 | 1.00 | 32.26 |      | H0 |
| ANISOU 4689 | HG13 VAL B 97 | 3880    | 4780    | 3600   | -190 | 230   | -170 | H0 |
| ATOM 4690   | HG21 VAL B 97 | -46.551 | -5.658  | 21.429 | 1.00 | 31.65 |      | H0 |
| ANISOU 4690 | HG21 VAL B 97 | 3710    | 4730    | 3590   | -300 | 140   | -110 | H0 |
| ATOM 4691   | HG22 VAL B 97 | -45.998 | -5.286  | 19.987 | 1.00 | 32.18 |      | H0 |
| ANISOU 4691 | HG22 VAL B 97 | 3770    | 4840    | 3610   | -290 | 180   | -80  | H0 |
| ATOM 4692   | HG23 VAL B 97 | -45.264 | -4.738  | 21.283 | 1.00 | 32.05 |      | H0 |
| ANISOU 4692 | HG23 VAL B 97 | 3690    | 4830    | 3650   | -320 | 160   | -50  | H0 |
| ATOM 4693   | N LEU B 98    | -44.019 | -9.517  | 22.913 | 1.00 | 30.99 |      | N0 |
| ANISOU 4693 | N LEU B 98    | 3660    | 4640    | 3480   | -50  | 260   | -100 | N0 |
| ATOM 4694   | CA LEU B 98   | -43.175 | -10.720 | 23.139 | 1.00 | 32.14 |      | C0 |
| ANISOU 4694 | CA LEU B 98   | 3830    | 4780    | 3600   | 70   | 310   | -90  | C0 |
| ATOM 4695   | C LEU B 98    | -43.186 | -11.654 | 21.920 | 1.00 | 32.17 |      | C0 |

|                           |         |         |        |      |       |      |    |
|---------------------------|---------|---------|--------|------|-------|------|----|
| ANISOU 4695 C LEU B 98    | 3930    | 4740    | 3550   | 130  | 380   | -120 | C0 |
| ATOM 4696 O LEU B 98      | -42.310 | -12.523 | 21.860 | 1.00 | 33.70 |      | O0 |
| ANISOU 4696 O LEU B 98    | 4150    | 4940    | 3710   | 260  | 440   | -100 | O0 |
| ATOM 4697 CB LEU B 98     | -43.702 | -11.450 | 24.376 | 1.00 | 32.28 |      | C0 |
| ANISOU 4697 CB LEU B 98   | 3930    | 4710    | 3620   | 80   | 290   | -100 | C0 |
| ATOM 4698 CG LEU B 98     | -43.732 | -10.616 | 25.655 | 1.00 | 32.24 |      | C0 |
| ANISOU 4698 CG LEU B 98   | 3860    | 4740    | 3650   | 30   | 230   | -70  | C0 |
| ATOM 4699 CD1 LEU B 98    | -44.411 | -11.379 | 26.782 | 1.00 | 32.53 |      | C0 |
| ANISOU 4699 CD1 LEU B 98  | 4000    | 4690    | 3670   | 40   | 230   | -80  | C0 |
| ATOM 4700 CD2 LEU B 98    | -42.328 | -10.203 | 26.057 | 1.00 | 32.69 |      | C0 |
| ANISOU 4700 CD2 LEU B 98  | 3790    | 4910    | 3720   | 80   | 200   | -20  | C0 |
| ATOM 4701 H LEU B 98      | -44.883 | -9.628  | 23.182 | 1.00 | 30.86 |      | H0 |
| ANISOU 4701 H LEU B 98    | 3690    | 4570    | 3470   | -90  | 250   | -130 | H0 |
| ATOM 4702 HA LEU B 98     | -42.250 | -10.425 | 23.301 | 1.00 | 32.37 |      | H0 |
| ANISOU 4702 HA LEU B 98   | 3770    | 4880    | 3640   | 100  | 310   | -50  | H0 |
| ATOM 4703 HB2 LEU B 98    | -44.609 | -11.764 | 24.187 | 1.00 | 32.10 |      | H0 |
| ANISOU 4703 HB2 LEU B 98  | 3980    | 4620    | 3600   | 30   | 300   | -140 | H0 |
| ATOM 4704 HB3 LEU B 98    | -43.142 | -12.237 | 24.531 | 1.00 | 32.95 |      | H0 |
| ANISOU 4704 HB3 LEU B 98  | 4050    | 4780    | 3690   | 170  | 320   | -80  | H0 |
| ATOM 4705 HG LEU B 98     | -44.256 | -9.797  | 25.479 | 1.00 | 31.66 |      | H0 |
| ANISOU 4705 HG LEU B 98   | 3760    | 4670    | 3600   | -50  | 200   | -90  | H0 |
| ATOM 4706 HD11 LEU B 98   | -45.323 | -11.597 | 26.523 | 1.00 | 32.20 |      | H0 |
| ANISOU 4706 HD11 LEU B 98 | 4010    | 4590    | 3640   | -20  | 250   | -110 | H0 |
| ATOM 4707 HD12 LEU B 98   | -44.426 | -10.828 | 27.584 | 1.00 | 32.23 |      | H0 |
| ANISOU 4707 HD12 LEU B 98 | 3930    | 4680    | 3650   | 10   | 190   | -70  | H0 |
| ATOM 4708 HD13 LEU B 98   | -43.920 | -12.199 | 26.961 | 1.00 | 33.04 |      | H0 |
| ANISOU 4708 HD13 LEU B 98 | 4100    | 4730    | 3720   | 120  | 260   | -60  | H0 |
| ATOM 4709 HD21 LEU B 98   | -41.736 | -10.973 | 26.003 | 1.00 | 33.40 |      | H0 |
| ANISOU 4709 HD21 LEU B 98 | 3890    | 5010    | 3790   | 180  | 230   | 0    | H0 |
| ATOM 4710 HD22 LEU B 98   | -42.337 | -9.864  | 26.969 | 1.00 | 32.64 |      | H0 |
| ANISOU 4710 HD22 LEU B 98 | 3770    | 4910    | 3720   | 60   | 150   | -10  | H0 |
| ATOM 4711 HD23 LEU B 98   | -42.009 | -9.507  | 25.456 | 1.00 | 32.72 |      | H0 |
| ANISOU 4711 HD23 LEU B 98 | 3720    | 4970    | 3740   | 40   | 200   | -10  | H0 |
| ATOM 4712 N THR B 99      | -44.130 | -11.489 | 20.993 | 1.00 | 31.36 |      | N0 |
| ANISOU 4712 N THR B 99    | 3890    | 4600    | 3420   | 60   | 370   | -170 | N0 |
| ATOM 4713 CA THR B 99     | -44.457 | -12.502 | 19.952 | 1.00 | 32.15 |      | C0 |
| ANISOU 4713 CA THR B 99   | 4140    | 4630    | 3460   | 90   | 420   | -230 | C0 |
| ATOM 4714 C THR B 99      | -44.191 | -11.943 | 18.557 | 1.00 | 32.06 |      | C0 |
| ANISOU 4714 C THR B 99    | 4110    | 4680    | 3390   | 100  | 440   | -230 | C0 |
| ATOM 4715 O THR B 99      | -44.119 | -10.729 | 18.375 | 1.00 | 31.62 |      | O0 |
| ANISOU 4715 O THR B 99    | 3950    | 4710    | 3360   | 50   | 420   | -190 | O0 |
| ATOM 4716 CB THR B 99     | -45.903 | -12.966 | 20.134 | 1.00 | 31.91 |      | C0 |
| ANISOU 4716 CB THR B 99   | 4200    | 4490    | 3430   | -10  | 370   | -300 | C0 |
| ATOM 4717 OG1 THR B 99    | -46.710 | -11.794 | 20.262 | 1.00 | 31.21 |      | O0 |
| ANISOU 4717 OG1 THR B 99  | 4020    | 4460    | 3380   | -120 | 310   | -290 | O0 |
| ATOM 4718 CG2 THR B 99    | -46.073 | -13.846 | 21.353 | 1.00 | 32.03 |      | C0 |
| ANISOU 4718 CG2 THR B 99  | 4280    | 4420    | 3470   | -10  | 380   | -290 | C0 |
| ATOM 4719 H THR B 99      | -44.643 | -10.740 | 20.925 | 1.00 | 30.98 |      | H0 |
| ANISOU 4719 H THR B 99    | 3810    | 4570    | 3390   | -20  | 340   | -170 | H0 |
| ATOM 4720 HA THR B 99     | -43.866 | -13.276 | 20.093 | 1.00 | 32.70 |      | H0 |
| ANISOU 4720 HA THR B 99   | 4250    | 4670    | 3500   | 190  | 460   | -220 | H0 |
| ATOM 4721 HB THR B 99     | -46.179 | -13.467 | 19.330 | 1.00 | 32.48 |      | H0 |
| ANISOU 4721 HB THR B 99   | 4360    | 4520    | 3450   | -20  | 390   | -340 | H0 |
| ATOM 4722 HG21 THR B 99   | -45.728 | -14.737 | 21.163 | 1.00 | 32.79 |      | H0 |

|                           |         |         |        |      |       |      |    |
|---------------------------|---------|---------|--------|------|-------|------|----|
| ANISOU 4722 HG21 THR B 99 | 4480    | 4450    | 3530   | 60   | 430   | -310 | H0 |
| ATOM 4723 HG22 THR B 99   | -47.017 | -13.907 | 21.582 | 1.00 | 31.83 |      | H0 |
| ANISOU 4723 HG22 THR B 99 | 4280    | 4350    | 3460   | -100 | 360   | -320 | H0 |
| ATOM 4724 HG23 THR B 99   | -45.583 | -13.463 | 22.103 | 1.00 | 31.72 |      | H0 |
| ANISOU 4724 HG23 THR B 99 | 4170    | 4420    | 3460   | 20   | 380   | -240 | H0 |
| ATOM 4725 N PRO B 100     | -44.027 | -12.804 | 17.527 | 1.00 | 32.52 |      | N0 |
| ANISOU 4725 N PRO B 100   | 4290    | 4700    | 3360   | 180  | 500   | -270 | N0 |
| ATOM 4726 CA PRO B 100    | -43.916 | -12.329 | 16.150 | 1.00 | 33.18 |      | C0 |
| ANISOU 4726 CA PRO B 100  | 4390    | 4840    | 3370   | 190  | 530   | -280 | C0 |
| ATOM 4727 C PRO B 100     | -45.127 | -11.462 | 15.791 | 1.00 | 32.41 |      | C0 |
| ANISOU 4727 C PRO B 100   | 4280    | 4750    | 3280   | 60   | 440   | -300 | C0 |
| ATOM 4728 O PRO B 100     | -46.240 | -11.809 | 16.166 | 1.00 | 31.75 |      | O0 |
| ANISOU 4728 O PRO B 100   | 4250    | 4600    | 3220   | -30  | 370   | -360 | O0 |
| ATOM 4729 CB PRO B 100    | -43.876 | -13.611 | 15.302 | 1.00 | 34.19 |      | C0 |
| ANISOU 4729 CB PRO B 100  | 4710    | 4890    | 3400   | 280  | 580   | -350 | C0 |
| ATOM 4730 CG PRO B 100    | -43.377 | -14.668 | 16.268 | 1.00 | 34.78 |      | C0 |
| ANISOU 4730 CG PRO B 100  | 4830    | 4880    | 3500   | 370  | 620   | -350 | C0 |
| ATOM 4731 CD PRO B 100    | -43.944 | -14.268 | 17.617 | 1.00 | 33.31 |      | C0 |
| ANISOU 4731 CD PRO B 100  | 4550    | 4690    | 3420   | 260  | 550   | -320 | C0 |
| ATOM 4732 HA PRO B 100    | -43.074 | -11.821 | 16.036 | 1.00 | 33.27 |      | H0 |
| ANISOU 4732 HA PRO B 100  | 4310    | 4940    | 3390   | 230  | 570   | -220 | H0 |
| ATOM 4733 HB2 PRO B 100   | -44.768 | -13.839 | 14.963 | 1.00 | 34.34 |      | H0 |
| ANISOU 4733 HB2 PRO B 100 | 4810    | 4850    | 3390   | 210  | 530   | -410 | H0 |
| ATOM 4734 HB3 PRO B 100   | -43.263 | -13.512 | 14.543 | 1.00 | 34.96 |      | H0 |
| ANISOU 4734 HB3 PRO B 100 | 4810    | 5040    | 3440   | 350  | 640   | -330 | H0 |
| ATOM 4735 HG2 PRO B 100   | -43.698 | -15.555 | 16.007 | 1.00 | 35.37 |      | H0 |
| ANISOU 4735 HG2 PRO B 100 | 5050    | 4860    | 3530   | 390  | 640   | -410 | H0 |
| ATOM 4736 HG3 PRO B 100   | -42.399 | -14.681 | 16.294 | 1.00 | 35.14 |      | H0 |
| ANISOU 4736 HG3 PRO B 100 | 4810    | 4990    | 3540   | 480  | 690   | -300 | H0 |
| ATOM 4737 HD2 PRO B 100   | -44.825 | -14.661 | 17.759 | 1.00 | 33.31 |      | H0 |
| ANISOU 4737 HD2 PRO B 100 | 4630    | 4600    | 3420   | 190  | 510   | -370 | H0 |
| ATOM 4738 HD3 PRO B 100   | -43.352 | -14.544 | 18.341 | 1.00 | 33.52 |      | H0 |
| ANISOU 4738 HD3 PRO B 100 | 4540    | 4720    | 3480   | 330  | 570   | -280 | H0 |
| ATOM 4739 N GLN B 101     | -44.884 | -10.353 | 15.095 | 1.00 | 33.35 |      | N0 |
| ANISOU 4739 N GLN B 101   | 4330    | 4960    | 3380   | 40   | 440   | -250 | N0 |
| ATOM 4740 CA GLN B 101    | -45.938 | -9.379  | 14.712 | 1.00 | 34.24 |      | C0 |
| ANISOU 4740 CA GLN B 101  | 4430    | 5090    | 3490   | -50  | 360   | -260 | C0 |
| ATOM 4741 C GLN B 101     | -46.611 | -9.847  | 13.412 | 1.00 | 34.38 |      | C0 |
| ANISOU 4741 C GLN B 101   | 4590    | 5090    | 3390   | -40  | 340   | -330 | C0 |
| ATOM 4742 O GLN B 101     | -46.499 | -9.152  | 12.384 | 1.00 | 35.35 |      | O0 |
| ANISOU 4742 O GLN B 101   | 4730    | 5270    | 3430   | -20  | 350   | -300 | O0 |
| ATOM 4743 CB GLN B 101    | -45.332 | -7.974  | 14.659 | 1.00 | 35.60 |      | C0 |
| ANISOU 4743 CB GLN B 101  | 4500    | 5340    | 3690   | -70  | 380   | -170 | C0 |
| ATOM 4744 CG GLN B 101    | -44.972 | -7.433  | 16.040 | 1.00 | 36.37 |      | C0 |
| ANISOU 4744 CG GLN B 101  | 4480    | 5440    | 3900   | -110 | 360   | -120 | C0 |
| ATOM 4745 CD GLN B 101    | -46.186 | -6.959  | 16.808 | 1.00 | 37.89 |      | C0 |
| ANISOU 4745 CD GLN B 101  | 4660    | 5590    | 4140   | -180 | 270   | -150 | C0 |
| ATOM 4746 OE1 GLN B 101   | -47.173 | -7.679  | 16.988 | 1.00 | 37.79 |      | O0 |
| ANISOU 4746 OE1 GLN B 101 | 4700    | 5530    | 4130   | -200 | 220   | -210 | O0 |
| ATOM 4747 NE2 GLN B 101   | -46.133 | -5.719  | 17.270 | 1.00 | 39.84 |      | N0 |
| ANISOU 4747 NE2 GLN B 101 | 4840    | 5850    | 4440   | -230 | 240   | -100 | N0 |
| ATOM 4748 H GLN B 101     | -44.049 | -10.129 | 14.806 | 1.00 | 33.82 |      | H0 |
| ANISOU 4748 H GLN B 101   | 4350    | 5070    | 3420   | 100  | 500   | -210 | H0 |
| ATOM 4749 HA GLN B 101    | -46.620 | -9.388  | 15.419 | 1.00 | 33.57 |      | H0 |

|                            |         |         |        |      |       |      |    |
|----------------------------|---------|---------|--------|------|-------|------|----|
| ANISOU 4749 HA GLN B 101   | 4330    | 4970    | 3450   | -110 | 300   | -280 | H0 |
| ATOM 4750 HB2 GLN B 101    | -44.527 | -7.999  | 14.101 | 1.00 | 36.19 |      | H0 |
| ANISOU 4750 HB2 GLN B 101  | 4570    | 5460    | 3720   | -10  | 450   | -140 | H0 |
| ATOM 4751 HB3 GLN B 101    | -45.975 | -7.370  | 14.235 | 1.00 | 35.50 |      | H0 |
| ANISOU 4751 HB3 GLN B 101  | 4500    | 5330    | 3650   | -100 | 330   | -170 | H0 |
| ATOM 4752 HG2 GLN B 101    | -44.522 | -8.137  | 16.555 | 1.00 | 36.59 |      | H0 |
| ANISOU 4752 HG2 GLN B 101  | 4500    | 5460    | 3950   | -70  | 380   | -130 | H0 |
| ATOM 4753 HG3 GLN B 101    | -44.342 | -6.688  | 15.938 | 1.00 | 36.70 |      | H0 |
| ANISOU 4753 HG3 GLN B 101  | 4460    | 5530    | 3950   | -120 | 380   | -60  | H0 |
| ATOM 4754 HE21 GLN B 101   | -46.882 | -5.288  | 17.465 | 1.00 | 38.79 |      | H0 |
| ANISOU 4754 HE21 GLN B 101 | 4720    | 5700    | 4320   | -260 | 190   | -110 | H0 |
| ATOM 4755 HE22 GLN B 101   | -45.349 | -5.320  | 17.387 | 1.00 | 39.23 |      | H0 |
| ANISOU 4755 HE22 GLN B 101 | 4720    | 5800    | 4380   | -230 | 270   | -50  | H0 |
| ATOM 4756 N LEU B 102      | -47.294 | -10.991 | 13.484 | 1.00 | 34.37 |      | N0 |
| ANISOU 4756 N LEU B 102    | 4690    | 5010    | 3360   | -70  | 300   | -420 | N0 |
| ATOM 4757 CA LEU B 102     | -48.115 | -11.580 | 12.397 | 1.00 | 35.48 |      | C0 |
| ANISOU 4757 CA LEU B 102   | 4970    | 5120    | 3390   | -100 | 250   | -510 | C0 |
| ATOM 4758 C LEU B 102      | -49.582 | -11.625 | 12.837 | 1.00 | 34.36 |      | C0 |
| ANISOU 4758 C LEU B 102    | 4790    | 4960    | 3300   | -230 | 130   | -560 | C0 |
| ATOM 4759 O LEU B 102      | -49.853 | -12.005 | 13.996 | 1.00 | 34.39 |      | O0 |
| ANISOU 4759 O LEU B 102    | 4750    | 4910    | 3410   | -290 | 130   | -570 | O0 |
| ATOM 4760 CB LEU B 102     | -47.610 | -12.991 | 12.087 | 1.00 | 37.70 |      | C0 |
| ANISOU 4760 CB LEU B 102   | 5420    | 5300    | 3600   | -30  | 320   | -580 | C0 |
| ATOM 4761 CG LEU B 102     | -46.145 | -13.115 | 11.670 | 1.00 | 39.22 |      | C0 |
| ANISOU 4761 CG LEU B 102   | 5630    | 5530    | 3740   | 130  | 450   | -530 | C0 |
| ATOM 4762 CD1 LEU B 102    | -45.841 | -14.537 | 11.230 | 1.00 | 41.17 |      | C0 |
| ANISOU 4762 CD1 LEU B 102  | 6080    | 5660    | 3900   | 210  | 510   | -610 | C0 |
| ATOM 4763 CD2 LEU B 102    | -45.802 | -12.137 | 10.558 | 1.00 | 39.95 |      | C0 |
| ANISOU 4763 CD2 LEU B 102  | 5700    | 5730    | 3750   | 170  | 480   | -480 | C0 |
| ATOM 4764 H LEU B 102      | -47.306 | -11.494 | 14.242 | 1.00 | 34.23 |      | H0 |
| ANISOU 4764 H LEU B 102    | 4670    | 4940    | 3400   | -80  | 310   | -430 | H0 |
| ATOM 4765 HA LEU B 102     | -48.036 | -11.013 | 11.597 | 1.00 | 35.82 |      | H0 |
| ANISOU 4765 HA LEU B 102   | 5020    | 5220    | 3370   | -80  | 250   | -490 | H0 |
| ATOM 4766 HB2 LEU B 102    | -47.750 | -13.545 | 12.881 | 1.00 | 37.41 |      | H0 |
| ANISOU 4766 HB2 LEU B 102  | 5380    | 5200    | 3630   | -60  | 310   | -600 | H0 |
| ATOM 4767 HB3 LEU B 102    | -48.164 | -13.362 | 11.371 | 1.00 | 38.45 |      | H0 |
| ANISOU 4767 HB3 LEU B 102  | 5610    | 5370    | 3620   | -60  | 270   | -650 | H0 |
| ATOM 4768 HG LEU B 102     | -45.580 | -12.904 | 12.454 | 1.00 | 38.60 |      | H0 |
| ANISOU 4768 HG LEU B 102   | 5450    | 5470    | 3740   | 150  | 490   | -470 | H0 |
| ATOM 4769 HD11 LEU B 102   | -46.064 | -15.154 | 11.949 | 1.00 | 40.88 |      | H0 |
| ANISOU 4769 HD11 LEU B 102 | 6070    | 5550    | 3910   | 180  | 500   | -640 | H0 |
| ATOM 4770 HD12 LEU B 102   | -44.894 | -14.616 | 11.018 | 1.00 | 41.50 |      | H0 |
| ANISOU 4770 HD12 LEU B 102 | 6120    | 5740    | 3910   | 330  | 610   | -570 | H0 |
| ATOM 4771 HD13 LEU B 102   | -46.368 | -14.754 | 10.442 | 1.00 | 41.75 |      | H0 |
| ANISOU 4771 HD13 LEU B 102 | 6270    | 5720    | 3880   | 180  | 470   | -680 | H0 |
| ATOM 4772 HD21 LEU B 102   | -46.525 | -12.117 | 9.907  | 1.00 | 40.25 |      | H0 |
| ANISOU 4772 HD21 LEU B 102 | 5810    | 5760    | 3720   | 130  | 410   | -530 | H0 |
| ATOM 4773 HD22 LEU B 102   | -44.980 | -12.418 | 10.119 | 1.00 | 40.60 |      | H0 |
| ANISOU 4773 HD22 LEU B 102 | 5820    | 5830    | 3770   | 270  | 570   | -460 | H0 |
| ATOM 4774 HD23 LEU B 102   | -45.679 | -11.248 | 10.933 | 1.00 | 39.05 |      | H0 |
| ANISOU 4774 HD23 LEU B 102 | 5460    | 5680    | 3700   | 140  | 470   | -410 | H0 |
| ATOM 4775 N ALA B 103      | -50.487 | -11.247 | 11.936 | 1.00 | 34.39 |      | N0 |
| ANISOU 4775 N ALA B 103    | 4810    | 5010    | 3240   | -280 | 40    | -600 | N0 |
| ATOM 4776 CA ALA B 103     | -51.948 | -11.442 | 12.055 | 1.00 | 34.50 |      | C0 |

|                           |         |         |        |       |       |       |    |
|---------------------------|---------|---------|--------|-------|-------|-------|----|
| ANISOU 4776 CA ALA B 103  | 4800    | 5040    | 3270   | -410  | -90   | -670  | C0 |
| ATOM 4777 C ALA B 103     | -52.351 | -12.650 | 11.206 | 1.00  | 35.58 |       | C0 |
| ANISOU 4777 C ALA B 103   | 5100    | 5110    | 3310   | -460  | -130  | -780  | C0 |
| ATOM 4778 O ALA B 103     | -51.713 | -12.881 | 10.166 | 1.00  | 36.19 |       | O0 |
| ANISOU 4778 O ALA B 103   | 5320    | 5180    | 3260   | -380  | -90   | -810  | O0 |
| ATOM 4779 CB ALA B 103    | -52.678 | -10.196 | 11.613 | 1.00  | 34.87 |       | C0 |
| ANISOU 4779 CB ALA B 103  | 4740    | 5200    | 3300   | -410  | -170  | -620  | C0 |
| ATOM 4780 H ALA B 103     | -50.262 | -10.829 | 11.159 | 1.00  | 34.84 |       | H0 |
| ANISOU 4780 H ALA B 103   | 4900    | 5120    | 3220   | -240  | 40    | -580  | H0 |
| ATOM 4781 HA ALA B 103    | -52.170 | -11.628 | 12.997 | 1.00  | 34.00 |       | H0 |
| ANISOU 4781 HA ALA B 103  | 4670    | 4940    | 3300   | -450  | -80   | -660  | H0 |
| ATOM 4782 HB1 ALA B 103   | -53.637 | -10.332 | 11.701 | 1.00  | 35.10 |       | H0 |
| ANISOU 4782 HB1 ALA B 103 | 4730    | 5260    | 3350   | -490  | -250  | -660  | H0 |
| ATOM 4783 HB2 ALA B 103   | -52.407 | -9.446  | 12.169 | 1.00  | 33.86 |       | H0 |
| ANISOU 4783 HB2 ALA B 103 | 4530    | 5100    | 3240   | -380  | -140  | -550  | H0 |
| ATOM 4784 HB3 ALA B 103   | -52.463 | -10.005 | 10.685 | 1.00  | 35.33 |       | H0 |
| ANISOU 4784 HB3 ALA B 103 | 4870    | 5290    | 3270   | -360  | -180  | -630  | H0 |
| ATOM 4785 N ARG B 104     | -53.360 | -13.398 | 11.655 | 1.00  | 35.85 |       | N0 |
| ANISOU 4785 N ARG B 104   | 5130    | 5100    | 3390   | -600  | -200  | -850  | N0 |
| ATOM 4786 CA ARG B 104    | -54.041 | -14.442 | 10.849 | 1.00  | 37.41 |       | C0 |
| ANISOU 4786 CA ARG B 104  | 5480    | 5240    | 3490   | -710  | -280  | -980  | C0 |
| ATOM 4787 C ARG B 104     | -55.203 | -13.768 | 10.112 | 1.00  | 37.83 |       | C0 |
| ANISOU 4787 C ARG B 104   | 5430    | 5440    | 3500   | -780  | -440  | -1000 | C0 |
| ATOM 4788 O ARG B 104     | -56.023 | -13.113 | 10.786 | 1.00  | 37.04 |       | O0 |
| ANISOU 4788 O ARG B 104   | 5140    | 5430    | 3500   | -840  | -490  | -960  | O0 |
| ATOM 4789 CB ARG B 104    | -54.493 | -15.592 | 11.754 | 1.00  | 38.05 |       | C0 |
| ANISOU 4789 CB ARG B 104  | 5600    | 5190    | 3660   | -840  | -270  | -1030 | C0 |
| ATOM 4790 CG ARG B 104    | -54.857 | -16.867 | 11.010 | 1.00  | 40.54 |       | C0 |
| ANISOU 4790 CG ARG B 104  | 6130    | 5390    | 3870   | -950  | -320  | -1160 | C0 |
| ATOM 4791 CD ARG B 104    | -53.677 | -17.532 | 10.320 | 1.00  | 41.33 |       | C0 |
| ANISOU 4791 CD ARG B 104  | 6480    | 5370    | 3850   | -810  | -230  | -1200 | C0 |
| ATOM 4792 NE ARG B 104    | -54.086 | -18.771 | 9.678  | 1.00  | 43.71 |       | N0 |
| ANISOU 4792 NE ARG B 104  | 7020    | 5530    | 4050   | -920  | -280  | -1340 | N0 |
| ATOM 4793 CZ ARG B 104    | -53.276 | -19.591 | 9.016  | 1.00  | 45.41 |       | C0 |
| ANISOU 4793 CZ ARG B 104  | 7500    | 5620    | 4140   | -810  | -210  | -1410 | C0 |
| ATOM 4794 NH1 ARG B 104   | -51.987 | -19.312 | 8.902  | 1.00  | 45.04 |       | N0 |
| ANISOU 4794 NH1 ARG B 104 | 7480    | 5580    | 4050   | -580  | -70   | -1340 | N0 |
| ATOM 4795 NH2 ARG B 104   | -53.759 | -20.692 | 8.468  | 1.00  | 47.49 |       | N0 |
| ANISOU 4795 NH2 ARG B 104 | 7990    | 5740    | 4310   | -930  | -270  | -1550 | N0 |
| ATOM 4796 H ARG B 104     | -53.696 | -13.309 | 12.497 | 1.00  | 35.27 |       | H0 |
| ANISOU 4796 H ARG B 104   | 4970    | 5030    | 3410   | -650  | -200  | -830  | H0 |
| ATOM 4797 HA ARG B 104    | -53.403 | -14.789 | 10.186 | 1.00  | 38.01 |       | H0 |
| ANISOU 4797 HA ARG B 104  | 5690    | 5270    | 3470   | -630  | -240  | -1010 | H0 |
| ATOM 4798 HB2 ARG B 104   | -53.773 | -15.791 | 12.388 | 1.00  | 37.41 |       | H0 |
| ANISOU 4798 HB2 ARG B 104 | 5550    | 5050    | 3620   | -780  | -180  | -990  | H0 |
| ATOM 4799 HB3 ARG B 104   | -55.272 | -15.295 | 12.270 | 1.00  | 37.88 |       | H0 |
| ANISOU 4799 HB3 ARG B 104 | 5450    | 5230    | 3710   | -930  | -320  | -1010 | H0 |
| ATOM 4800 HG2 ARG B 104   | -55.251 | -17.505 | 11.643 | 1.00  | 40.81 |       | H0 |
| ANISOU 4800 HG2 ARG B 104 | 6180    | 5350    | 3970   | -1060 | -320  | -1190 | H0 |
| ATOM 4801 HG3 ARG B 104   | -55.539 | -16.659 | 10.335 | 1.00  | 41.28 |       | H0 |
| ANISOU 4801 HG3 ARG B 104 | 6200    | 5560    | 3910   | -1020 | -430  | -1210 | H0 |
| ATOM 4802 HD2 ARG B 104   | -53.305 | -16.924 | 9.647  | 1.00  | 41.18 |       | H0 |
| ANISOU 4802 HD2 ARG B 104 | 6450    | 5440    | 3760   | -710  | -230  | -1180 | H0 |
| ATOM 4803 HD3 ARG B 104   | -52.977 | -17.721 | 10.981 | 1.00  | 40.64 |       | H0 |

|                            |         |         |       |       |       |       |    |
|----------------------------|---------|---------|-------|-------|-------|-------|----|
| ANISOU 4803 HD3 ARG B 104  | 6400    | 5220    | 3820  | -730  | -130  | -1150 | H0 |
| ATOM 4804 HE ARG B 104     | -54.927 | -18.995 | 9.730 | 1.00  | 44.50 |       | H0 |
| ANISOU 4804 HE ARG B 104   | 7090    | 5640    | 4180  | -1060 | -370  | -1390 | H0 |
| ATOM 4805 HH11 ARG B 104   | -51.659 | -18.581 | 9.260 | 1.00  | 43.58 |       | H0 |
| ANISOU 4805 HH11 ARG B 104 | 7140    | 5480    | 3930  | -510  | -30   | -1250 | H0 |
| ATOM 4806 HH12 ARG B 104   | -51.459 | -19.858 | 8.461 | 1.00  | 45.79 |       | H0 |
| ANISOU 4806 HH12 ARG B 104 | 7740    | 5590    | 4060  | -500  | -10   | -1380 | H0 |
| ATOM 4807 HH21 ARG B 104   | -54.615 | -20.883 | 8.547 | 1.00  | 48.16 |       | H0 |
| ANISOU 4807 HH21 ARG B 104 | 8050    | 5820    | 4430  | -1100 | -360  | -1590 | H0 |
| ATOM 4808 HH22 ARG B 104   | -53.227 | -21.236 | 8.031 | 1.00  | 48.41 |       | H0 |
| ANISOU 4808 HH22 ARG B 104 | 8300    | 5750    | 4340  | -850  | -220  | -1590 | H0 |
| ATOM 4809 N VAL B 105      | -55.234 | -13.867 | 8.778 | 1.00  | 38.67 |       | N0 |
| ANISOU 4809 N VAL B 105    | 5670    | 5580    | 3440  | -750  | -510  | -1070 | N0 |
| ATOM 4810 CA VAL B 105     | -56.292 | -13.251 | 7.925 | 1.00  | 39.43 |       | C0 |
| ANISOU 4810 CA VAL B 105   | 5690    | 5820    | 3460  | -800  | -670  | -1090 | C0 |
| ATOM 4811 C VAL B 105      | -57.062 | -14.379 | 7.232 | 1.00  | 41.70 |       | C0 |
| ANISOU 4811 C VAL B 105    | 6110    | 6070    | 3660  | -950  | -800  | -1240 | C0 |
| ATOM 4812 O VAL B 105      | -56.418 | -15.226 | 6.583 | 1.00  | 42.74 |       | O0 |
| ANISOU 4812 O VAL B 105    | 6480    | 6080    | 3670  | -920  | -750  | -1320 | O0 |
| ATOM 4813 CB VAL B 105     | -55.703 | -12.245 | 6.917 | 1.00  | 39.28 |       | C0 |
| ANISOU 4813 CB VAL B 105   | 5720    | 5890    | 3320  | -630  | -660  | -1020 | C0 |
| ATOM 4814 CG1 VAL B 105    | -56.772 | -11.653 | 6.010 | 1.00  | 40.57 |       | C0 |
| ANISOU 4814 CG1 VAL B 105  | 5820    | 6210    | 3380  | -650  | -830  | -1040 | C0 |
| ATOM 4815 CG2 VAL B 105    | -54.940 | -11.132 | 7.614 | 1.00  | 37.65 |       | C0 |
| ANISOU 4815 CG2 VAL B 105  | 5390    | 5710    | 3210  | -510  | -540  | -880  | C0 |
| ATOM 4816 H VAL B 105      | -54.605 | -14.323 | 8.303 | 1.00  | 39.20 |       | H0 |
| ANISOU 4816 H VAL B 105    | 5890    | 5580    | 3430  | -700  | -450  | -1100 | H0 |
| ATOM 4817 HA VAL B 105     | -56.908 | -12.773 | 8.505 | 1.00  | 38.99 |       | H0 |
| ANISOU 4817 HA VAL B 105   | 5470    | 5840    | 3500  | -840  | -710  | -1050 | H0 |
| ATOM 4818 HB VAL B 105     | -55.063 | -12.738 | 6.347 | 1.00  | 39.92 |       | H0 |
| ANISOU 4818 HB VAL B 105   | 5960    | 5910    | 3300  | -580  | -600  | -1060 | H0 |
| ATOM 4819 HG11 VAL B 105   | -57.103 | -12.339 | 5.405 | 1.00  | 42.00 |       | H0 |
| ANISOU 4819 HG11 VAL B 105 | 6110    | 6380    | 3470  | -720  | -910  | -1140 | H0 |
| ATOM 4820 HG12 VAL B 105   | -56.390 | -10.923 | 5.491 | 1.00  | 40.44 |       | H0 |
| ANISOU 4820 HG12 VAL B 105 | 5830    | 6240    | 3290  | -540  | -810  | -980  | H0 |
| ATOM 4821 HG13 VAL B 105   | -57.507 | -11.316 | 6.551 | 1.00  | 40.32 |       | H0 |
| ANISOU 4821 HG13 VAL B 105 | 5630    | 6250    | 3440  | -700  | -890  | -1020 | H0 |
| ATOM 4822 HG21 VAL B 105   | -55.527 | -10.682 | 8.246 | 1.00  | 37.01 |       | H0 |
| ANISOU 4822 HG21 VAL B 105 | 5160    | 5680    | 3220  | -550  | -580  | -850  | H0 |
| ATOM 4823 HG22 VAL B 105   | -54.623 | -10.492 | 6.953 | 1.00  | 37.71 |       | H0 |
| ANISOU 4823 HG22 VAL B 105 | 5430    | 5770    | 3130  | -420  | -530  | -840  | H0 |
| ATOM 4824 HG23 VAL B 105   | -54.179 | -11.508 | 8.090 | 1.00  | 36.92 |       | H0 |
| ANISOU 4824 HG23 VAL B 105 | 5340    | 5530    | 3160  | -480  | -430  | -870  | H0 |
| ATOM 4825 N VAL B 106      | -58.390 | -14.376 | 7.371 | 1.00  | 43.00 |       | N0 |
| ANISOU 4825 N VAL B 106    | 6120    | 6340    | 3880  | -1110 | -950  | -1280 | N0 |
| ATOM 4826 CA VAL B 106     | -59.325 | -15.353 | 6.733 | 1.00  | 45.64 |       | C0 |
| ANISOU 4826 CA VAL B 106   | 6540    | 6670    | 4130  | -1310 | -1100 | -1420 | C0 |
| ATOM 4827 C VAL B 106      | -59.813 | -14.736 | 5.415 | 1.00  | 47.36 |       | C0 |
| ANISOU 4827 C VAL B 106    | 6760    | 7050    | 4180  | -1260 | -1270 | -1450 | C0 |
| ATOM 4828 O VAL B 106      | -59.824 | -13.491 | 5.321 | 1.00  | 46.23 |       | O0 |
| ANISOU 4828 O VAL B 106    | 6480    | 7050    | 4040  | -1110 | -1270 | -1340 | O0 |
| ATOM 4829 CB VAL B 106     | -60.489 | -15.711 | 7.680 | 1.00  | 46.07 |       | C0 |
| ANISOU 4829 CB VAL B 106   | 6400    | 6760    | 4350  | -1520 | -1170 | -1440 | C0 |
| ATOM 4830 CG1 VAL B 106    | -61.294 | -16.891 | 7.167 | 1.00  | 48.83 |       | C0 |



|             |                |         |         |       |       |       |       |    |
|-------------|----------------|---------|---------|-------|-------|-------|-------|----|
| ANISOU 4830 | CG1 VAL B 106  | 6850    | 7060    | 4640  | -1760 | -1310 | -1590 | C0 |
| ATOM 4831   | CG2 VAL B 106  | -60.010 | -15.982 | 9.101 | 1.00  | 44.58 |       | C0 |
| ANISOU 4831 | CG2 VAL B 106  | 6170    | 6440    | 4330  | -1520 | -990  | -1370 | C0 |
| ATOM 4832   | H VAL B 106    | -58.822 | -13.749 | 7.870 | 1.00  | 42.30 |       | H0 |
| ANISOU 4832 | H VAL B 106    | 5860    | 6340    | 3870  | -1110 | -960  | -1220 | H0 |
| ATOM 4833   | HA VAL B 106   | -58.830 | -16.167 | 6.529 | 1.00  | 46.20 |       | H0 |
| ANISOU 4833 | HA VAL B 106   | 6810    | 6600    | 4150  | -1320 | -1050 | -1490 | H0 |
| ATOM 4834   | HB VAL B 106   | -61.092 | -14.929 | 7.712 | 1.00  | 46.04 |       | H0 |
| ANISOU 4834 | HB VAL B 106   | 6200    | 6910    | 4380  | -1500 | -1240 | -1390 | H0 |
| ATOM 4835   | HG11 VAL B 106 | -61.795 | -16.623 | 6.377 | 1.00  | 50.03 |       | H0 |
| ANISOU 4835 | HG11 VAL B 106 | 6980    | 7330    | 4700  | -1780 | -1440 | -1630 | H0 |
| ATOM 4836   | HG12 VAL B 106 | -61.913 | -17.189 | 7.856 | 1.00  | 49.11 |       | H0 |
| ANISOU 4836 | HG12 VAL B 106 | 6770    | 7100    | 4790  | -1910 | -1320 | -1590 | H0 |
| ATOM 4837   | HG13 VAL B 106 | -60.692 | -17.620 | 6.936 | 1.00  | 49.19 |       | H0 |
| ANISOU 4837 | HG13 VAL B 106 | 7120    | 6950    | 4620  | -1760 | -1250 | -1650 | H0 |
| ATOM 4838   | HG21 VAL B 106 | -59.258 | -16.600 | 9.078 | 1.00  | 44.42 |       | H0 |
| ANISOU 4838 | HG21 VAL B 106 | 6330    | 6270    | 4270  | -1490 | -910  | -1400 | H0 |
| ATOM 4839   | HG22 VAL B 106 | -60.733 | -16.374 | 9.620 | 1.00  | 45.17 |       | H0 |
| ANISOU 4839 | HG22 VAL B 106 | 6150    | 6520    | 4480  | -1680 | -1030 | -1390 | H0 |
| ATOM 4840   | HG23 VAL B 106 | -59.730 | -15.148 | 9.516 | 1.00  | 43.04 |       | H0 |
| ANISOU 4840 | HG23 VAL B 106 | 5860    | 6310    | 4180  | -1410 | -940  | -1270 | H0 |
| ATOM 4841   | N SER B 107    | -60.189 | -15.571 | 4.440 | 1.00  | 50.17 |       | N0 |
| ANISOU 4841 | N SER B 107    | 7300    | 7380    | 4390  | -1370 | -1400 | -1590 | N0 |
| ATOM 4842   | CA SER B 107   | -60.552 | -15.167 | 3.052 | 1.00  | 52.70 |       | C0 |
| ANISOU 4842 | CA SER B 107   | 7680    | 7840    | 4500  | -1310 | -1560 | -1640 | C0 |
| ATOM 4843   | C SER B 107    | -61.772 | -14.234 | 3.036 | 1.00  | 53.83 |       | C0 |
| ANISOU 4843 | C SER B 107    | 7530    | 8230    | 4690  | -1340 | -1730 | -1590 | C0 |
| ATOM 4844   | O SER B 107    | -61.916 | -13.505 | 2.046 | 1.00  | 54.23 |       | O0 |
| ANISOU 4844 | O SER B 107    | 7600    | 8420    | 4580  | -1220 | -1840 | -1570 | O0 |
| ATOM 4845   | CB SER B 107   | -60.761 | -16.363 | 2.156 | 1.00  | 55.17 |       | C0 |
| ANISOU 4845 | CB SER B 107   | 8250    | 8060    | 4650  | -1450 | -1670 | -1820 | C0 |
| ATOM 4846   | OG SER B 107   | -61.609 | -17.324 | 2.765 | 1.00  | 56.78 |       | O0 |
| ANISOU 4846 | OG SER B 107   | 8400    | 8200    | 4970  | -1730 | -1750 | -1920 | O0 |
| ATOM 4847   | H SER B 107    | -60.249 | -16.472 | 4.561 | 1.00  | 51.07 |       | H0 |
| ANISOU 4847 | H SER B 107    | 7520    | 7380    | 4510  | -1490 | -1390 | -1680 | H0 |
| ATOM 4848   | HA SER B 107   | -59.785 | -14.654 | 2.689 | 1.00  | 51.84 |       | H0 |
| ANISOU 4848 | HA SER B 107   | 7650    | 7720    | 4320  | -1140 | -1470 | -1580 | H0 |
| ATOM 4849   | HB2 SER B 107  | -61.159 | -16.068 | 1.307 | 1.00  | 56.64 |       | H0 |
| ANISOU 4849 | HB2 SER B 107  | 8460    | 8360    | 4700  | -1440 | -1810 | -1860 | H0 |
| ATOM 4850   | HB3 SER B 107  | -59.891 | -16.777 | 1.958 | 1.00  | 55.09 |       | H0 |
| ANISOU 4850 | HB3 SER B 107  | 8450    | 7900    | 4570  | -1370 | -1560 | -1850 | H0 |
| ATOM 4851   | N ASP B 108    | -62.593 | -14.222 | 4.095 | 1.00  | 54.63 |       | N0 |
| ANISOU 4851 | N ASP B 108    | 7380    | 8400    | 4990  | -1480 | -1750 | -1560 | N0 |
| ATOM 4852   | CA ASP B 108   | -63.758 | -13.299 | 4.236 | 1.00  | 55.53 |       | C0 |
| ANISOU 4852 | CA ASP B 108   | 7170    | 8760    | 5160  | -1480 | -1890 | -1490 | C0 |
| ATOM 4853   | C ASP B 108    | -63.283 | -11.907 | 4.693 | 1.00  | 53.25 |       | C0 |
| ANISOU 4853 | C ASP B 108    | 6770    | 8530    | 4940  | -1230 | -1770 | -1320 | C0 |
| ATOM 4854   | O ASP B 108    | -64.125 | -10.990 | 4.745 | 1.00  | 54.10 |       | O0 |
| ANISOU 4854 | O ASP B 108    | 6650    | 8830    | 5080  | -1170 | -1870 | -1250 | O0 |
| ATOM 4855   | CB ASP B 108   | -64.833 | -13.882 | 5.162 | 1.00  | 56.63 |       | C0 |
| ANISOU 4855 | CB ASP B 108   | 7080    | 8950    | 5480  | -1720 | -1950 | -1520 | C0 |
| ATOM 4856   | CG ASP B 108   | -64.447 | -13.995 | 6.629 | 1.00  | 54.61 |       | C0 |
| ANISOU 4856 | CG ASP B 108   | 6750    | 8570    | 5430  | -1730 | -1740 | -1440 | C0 |
| ATOM 4857   | OD1 ASP B 108  | -63.268 | -13.762 | 6.956 | 1.00  | 52.69 |       | O0 |

|                           |         |         |        |       |       |       |    |
|---------------------------|---------|---------|--------|-------|-------|-------|----|
| ANISOU 4857 OD1 ASP B 108 | 6650    | 8180    | 5190   | -1580 | -1560 | -1380 | O0 |
| ATOM 4858 OD2 ASP B 108   | -65.335 | -14.322 | 7.439  | 1.00  | 55.83 |       | O0 |
| ANISOU 4858 OD2 ASP B 108 | 6700    | 8780    | 5730   | -1910 | -1760 | -1450 | O0 |
| ATOM 4859 H ASP B 108     | -62.500 | -14.798 | 4.793  | 1.00  | 53.98 |       | H0 |
| ANISOU 4859 H ASP B 108   | 7300    | 8210    | 5010   | -1570 | -1680 | -1570 | H0 |
| ATOM 4860 HA ASP B 108    | -64.165 | -13.199 | 3.344  | 1.00  | 57.11 |       | H0 |
| ANISOU 4860 HA ASP B 108  | 7400    | 9070    | 5230   | -1470 | -2040 | -1530 | H0 |
| ATOM 4861 HB2 ASP B 108   | -65.633 | -13.322 | 5.103  | 1.00  | 57.37 |       | H0 |
| ANISOU 4861 HB2 ASP B 108 | 6970    | 9230    | 5590   | -1710 | -2050 | -1490 | H0 |
| ATOM 4862 HB3 ASP B 108   | -65.068 | -14.778 | 4.843  | 1.00  | 58.16 |       | H0 |
| ANISOU 4862 HB3 ASP B 108 | 7380    | 9090    | 5630   | -1890 | -2020 | -1630 | H0 |
| ATOM 4863 N GLY B 109     | -61.992 | -11.743 | 4.999  | 1.00  | 50.97 |       | N0 |
| ANISOU 4863 N GLY B 109   | 6630    | 8070    | 4660   | -1100 | -1570 | -1250 | N0 |
| ATOM 4864 CA GLY B 109    | -61.399 | -10.454 | 5.409  | 1.00  | 49.14 |       | C0 |
| ANISOU 4864 CA GLY B 109  | 6330    | 7860    | 4480   | -890  | -1450 | -1100 | C0 |
| ATOM 4865 C GLY B 109     | -61.360 | -10.274 | 6.922  | 1.00  | 47.26 |       | C0 |
| ANISOU 4865 C GLY B 109   | 5930    | 7570    | 4460   | -920  | -1320 | -1030 | C0 |
| ATOM 4866 O GLY B 109     | -60.988 | -9.175  | 7.364  | 1.00  | 46.19 |       | O0 |
| ANISOU 4866 O GLY B 109   | 5720    | 7450    | 4370   | -760  | -1240 | -910  | O0 |
| ATOM 4867 H GLY B 109     | -61.398 | -12.429 | 4.988  | 1.00  | 50.89 |       | H0 |
| ANISOU 4867 H GLY B 109   | 6780    | 7930    | 4630   | -1130 | -1500 | -1300 | H0 |
| ATOM 4868 HA2 GLY B 109   | -60.477 | -10.401 | 5.052  | 1.00  | 48.48 |       | H0 |
| ANISOU 4868 HA2 GLY B 109 | 6400    | 7690    | 4320   | -800  | -1360 | -1080 | H0 |
| ATOM 4869 HA3 GLY B 109   | -61.921 | -9.716  | 5.006  | 1.00  | 49.72 |       | H0 |
| ANISOU 4869 HA3 GLY B 109 | 6310    | 8070    | 4510   | -820  | -1540 | -1060 | H0 |
| ATOM 4870 N GLU B 110     | -61.727 | -11.294 | 7.703  | 1.00  | 47.60 |       | N0 |
| ANISOU 4870 N GLU B 110   | 5920    | 7550    | 4610   | -1100 | -1300 | -1090 | N0 |
| ATOM 4871 CA GLU B 110    | -61.554 | -11.274 | 9.180  | 1.00  | 46.88 |       | C0 |
| ANISOU 4871 CA GLU B 110  | 5720    | 7390    | 4710   | -1120 | -1160 | -1030 | C0 |
| ATOM 4872 C GLU B 110     | -60.049 | -11.279 | 9.480  | 1.00  | 44.35 |       | C0 |
| ANISOU 4872 C GLU B 110   | 5580    | 6890    | 4380   | -1000 | -980  | -980  | C0 |
| ATOM 4873 O GLU B 110     | -59.309 | -12.048 | 8.827  | 1.00  | 44.17 |       | O0 |
| ANISOU 4873 O GLU B 110   | 5770    | 6750    | 4260   | -1010 | -950  | -1050 | O0 |
| ATOM 4874 CB GLU B 110    | -62.267 | -12.448 | 9.858  | 1.00  | 49.17 |       | C0 |
| ANISOU 4874 CB GLU B 110  | 5960    | 7630    | 5090   | -1350 | -1180 | -1110 | C0 |
| ATOM 4875 CG GLU B 110    | -62.251 | -12.360 | 11.376 | 1.00  | 49.43 |       | C0 |
| ANISOU 4875 CG GLU B 110  | 5860    | 7620    | 5300   | -1370 | -1040 | -1030 | C0 |
| ATOM 4876 CD GLU B 110    | -62.679 | -13.611 | 12.131 | 1.00  | 51.72 |       | C0 |
| ANISOU 4876 CD GLU B 110  | 6160    | 7810    | 5680   | -1590 | -1010 | -1090 | C0 |
| ATOM 4877 OE1 GLU B 110   | -62.772 | -14.691 | 11.505 | 1.00  | 53.26 |       | O0 |
| ANISOU 4877 OE1 GLU B 110 | 6500    | 7920    | 5810   | -1740 | -1070 | -1200 | O0 |
| ATOM 4878 OE2 GLU B 110   | -62.909 | -13.502 | 13.360 | 1.00  | 52.10 |       | O0 |
| ANISOU 4878 OE2 GLU B 110 | 6070    | 7860    | 5860   | -1610 | -910  | -1020 | O0 |
| ATOM 4879 H GLU B 110     | -62.104 | -12.057 | 7.381  | 1.00  | 49.11 |       | H0 |
| ANISOU 4879 H GLU B 110   | 6160    | 7730    | 4770   | -1230 | -1380 | -1180 | H0 |
| ATOM 4880 HA GLU B 110    | -61.939 | -10.435 | 9.521  | 1.00  | 46.39 |       | H0 |
| ANISOU 4880 HA GLU B 110  | 5510    | 7420    | 4690   | -1050 | -1170 | -960  | H0 |
| ATOM 4881 HB2 GLU B 110   | -63.196 | -12.473 | 9.548  | 1.00  | 50.71 |       | H0 |
| ANISOU 4881 HB2 GLU B 110 | 6030    | 7950    | 5280   | -1440 | -1300 | -1140 | H0 |
| ATOM 4882 HB3 GLU B 110   | -61.832 | -13.280 | 9.580  | 1.00  | 49.65 |       | H0 |
| ANISOU 4882 HB3 GLU B 110 | 6190    | 7570    | 5110   | -1420 | -1160 | -1180 | H0 |
| ATOM 4883 HG2 GLU B 110   | -61.344 | -12.128 | 11.667 | 1.00  | 47.89 |       | H0 |
| ANISOU 4883 HG2 GLU B 110 | 5760    | 7330    | 5110   | -1260 | -930  | -980  | H0 |
| ATOM 4884 HG3 GLU B 110   | -62.840 | -11.625 | 11.650 | 1.00  | 49.30 |       | H0 |

|                            |         |         |        |       |       |       |    |
|----------------------------|---------|---------|--------|-------|-------|-------|----|
| ANISOU 4884 HG3 GLU B 110  | 5670    | 7730    | 5330   | -1320 | -1070 | -970  | H0 |
| ATOM 4885 N VAL B 111      | -59.617 | -10.417 | 10.402 | 1.00  | 42.07 |       | N0 |
| ANISOU 4885 N VAL B 111    | 5200    | 6590    | 4200   | -900  | -870  | -870  | N0 |
| ATOM 4886 CA VAL B 111     | -58.209 | -10.316 | 10.877 | 1.00  | 40.46 |       | C0 |
| ANISOU 4886 CA VAL B 111   | 5110    | 6250    | 4020   | -790  | -710  | -820  | C0 |
| ATOM 4887 C VAL B 111      | -58.175 | -10.711 | 12.355 | 1.00  | 39.89 |       | C0 |
| ANISOU 4887 C VAL B 111    | 4960    | 6100    | 4100   | -860  | -610  | -790  | C0 |
| ATOM 4888 O VAL B 111      | -58.990 | -10.170 | 13.127 | 1.00  | 40.32 |       | O0 |
| ANISOU 4888 O VAL B 111    | 4840    | 6240    | 4240   | -880  | -630  | -750  | O0 |
| ATOM 4889 CB VAL B 111     | -57.653 | -8.900  | 10.660 | 1.00  | 39.49 |       | C0 |
| ANISOU 4889 CB VAL B 111   | 4960    | 6180    | 3870   | -620  | -670  | -710  | C0 |
| ATOM 4890 CG1 VAL B 111    | -56.192 | -8.810  | 11.066 | 1.00  | 38.23 |       | C0 |
| ANISOU 4890 CG1 VAL B 111  | 4890    | 5900    | 3730   | -540  | -520  | -650  | C0 |
| ATOM 4891 CG2 VAL B 111    | -57.851 | -8.438  | 9.225  | 1.00  | 40.79 |       | C0 |
| ANISOU 4891 CG2 VAL B 111  | 5190    | 6430    | 3870   | -550  | -770  | -720  | C0 |
| ATOM 4892 H VAL B 111      | -60.173 | -9.821  | 10.809 | 1.00  | 42.07 |       | H0 |
| ANISOU 4892 H VAL B 111    | 5050    | 6680    | 4250   | -880  | -890  | -830  | H0 |
| ATOM 4893 HA VAL B 111     | -57.664 | -10.946 | 10.373 | 1.00  | 40.89 |       | H0 |
| ANISOU 4893 HA VAL B 111   | 5310    | 6230    | 4000   | -800  | -680  | -860  | H0 |
| ATOM 4894 HB VAL B 111     | -58.166 | -8.290  | 11.246 | 1.00  | 39.18 |       | H0 |
| ANISOU 4894 HB VAL B 111   | 4790    | 6190    | 3900   | -610  | -680  | -660  | H0 |
| ATOM 4895 HG11 VAL B 111   | -56.123 | -8.803  | 12.036 | 1.00  | 37.35 |       | H0 |
| ANISOU 4895 HG11 VAL B 111 | 4720    | 5760    | 3720   | -560  | -460  | -630  | H0 |
| ATOM 4896 HG12 VAL B 111   | -55.805 | -7.991  | 10.710 | 1.00  | 37.92 |       | H0 |
| ANISOU 4896 HG12 VAL B 111 | 4870    | 5890    | 3650   | -450  | -500  | -590  | H0 |
| ATOM 4897 HG13 VAL B 111   | -55.708 | -9.576  | 10.712 | 1.00  | 38.53 |       | H0 |
| ANISOU 4897 HG13 VAL B 111 | 5050    | 5880    | 3720   | -560  | -480  | -700  | H0 |
| ATOM 4898 HG21 VAL B 111   | -57.504 | -9.113  | 8.615  | 1.00  | 41.39 |       | H0 |
| ANISOU 4898 HG21 VAL B 111 | 5400    | 6460    | 3870   | -570  | -770  | -780  | H0 |
| ATOM 4899 HG22 VAL B 111   | -57.377 | -7.601  | 9.084  | 1.00  | 40.22 |       | H0 |
| ANISOU 4899 HG22 VAL B 111 | 5130    | 6370    | 3780   | -450  | -730  | -640  | H0 |
| ATOM 4900 HG23 VAL B 111   | -58.799 | -8.304  | 9.053  | 1.00  | 41.66 |       | H0 |
| ANISOU 4900 HG23 VAL B 111 | 5210    | 6640    | 3980   | -590  | -880  | -740  | H0 |
| ATOM 4901 N LEU B 112      | -57.293 | -11.642 | 12.721 | 1.00  | 39.85 |       | N0 |
| ANISOU 4901 N LEU B 112    | 5090    | 5950    | 4100   | -880  | -510  | -820  | N0 |
| ATOM 4902 CA LEU B 112     | -57.048 | -12.050 | 14.129 | 1.00  | 39.55 |       | C0 |
| ANISOU 4902 CA LEU B 112   | 5020    | 5820    | 4190   | -910  | -410  | -790  | C0 |
| ATOM 4903 C LEU B 112      | -55.614 | -11.652 | 14.479 | 1.00  | 37.57 |       | C0 |
| ANISOU 4903 C LEU B 112    | 4840    | 5500    | 3940   | -770  | -290  | -720  | C0 |
| ATOM 4904 O LEU B 112      | -54.675 | -12.285 | 13.954 | 1.00  | 38.41 |       | O0 |
| ANISOU 4904 O LEU B 112    | 5100    | 5520    | 3980   | -720  | -230  | -740  | O0 |
| ATOM 4905 CB LEU B 112     | -57.272 | -13.558 | 14.294 | 1.00  | 41.12 |       | C0 |
| ANISOU 4905 CB LEU B 112   | 5340    | 5890    | 4390   | -1060 | -400  | -870  | C0 |
| ATOM 4906 CG LEU B 112     | -58.679 | -14.067 | 13.973 | 1.00  | 43.75 |       | C0 |
| ANISOU 4906 CG LEU B 112   | 5600    | 6290    | 4730   | -1250 | -520  | -950  | C0 |
| ATOM 4907 CD1 LEU B 112    | -58.851 | -14.320 | 12.482 | 1.00  | 45.49 |       | C0 |
| ANISOU 4907 CD1 LEU B 112  | 5930    | 6540    | 4810   | -1270 | -640  | -1040 | C0 |
| ATOM 4908 CD2 LEU B 112    | -58.992 | -15.341 | 14.748 | 1.00  | 44.94 |       | C0 |
| ANISOU 4908 CD2 LEU B 112  | 5820    | 6310    | 4950   | -1410 | -470  | -990  | C0 |
| ATOM 4909 H LEU B 112      | -56.779 | -12.092 | 12.118 | 1.00  | 40.30 |       | H0 |
| ANISOU 4909 H LEU B 112    | 5280    | 5950    | 4080   | -860  | -500  | -860  | H0 |
| ATOM 4910 HA LEU B 112     | -57.667 | -11.558 | 14.714 | 1.00  | 39.16 |       | H0 |
| ANISOU 4910 HA LEU B 112   | 4840    | 5830    | 4200   | -930  | -420  | -750  | H0 |
| ATOM 4911 HB2 LEU B 112    | -56.636 | -14.027 | 13.719 | 1.00  | 41.51 |       | H0 |

|                            |         |         |        |       |       |       |    |
|----------------------------|---------|---------|--------|-------|-------|-------|----|
| ANISOU 4911 HB2 LEU B 112  | 5540    | 5870    | 4370   | -1020 | -380  | -910  | H0 |
| ATOM 4912 HB3 LEU B 112    | -57.062 | -13.797 | 15.219 | 1.00  | 40.62 |       | H0 |
| ANISOU 4912 HB3 LEU B 112  | 5270    | 5770    | 4400   | -1070 | -320  | -840  | H0 |
| ATOM 4913 HG LEU B 112     | -59.329 | -13.373 | 14.245 | 1.00  | 43.55 |       | H0 |
| ANISOU 4913 HG LEU B 112   | 5410    | 6380    | 4750   | -1250 | -560  | -910  | H0 |
| ATOM 4914 HD11 LEU B 112   | -58.889 | -13.472 | 12.009 | 1.00  | 45.14 |       | H0 |
| ANISOU 4914 HD11 LEU B 112 | 5830    | 6600    | 4720   | -1180 | -680  | -1010 | H0 |
| ATOM 4915 HD12 LEU B 112   | -59.676 | -14.811 | 12.329 | 1.00  | 46.73 |       | H0 |
| ANISOU 4915 HD12 LEU B 112 | 6060    | 6720    | 4970   | -1410 | -720  | -1100 | H0 |
| ATOM 4916 HD13 LEU B 112   | -58.099 | -14.842 | 12.151 | 1.00  | 45.47 |       | H0 |
| ANISOU 4916 HD13 LEU B 112 | 6100    | 6430    | 4750   | -1230 | -590  | -1070 | H0 |
| ATOM 4917 HD21 LEU B 112   | -58.348 | -16.032 | 14.512 | 1.00  | 45.06 |       | H0 |
| ANISOU 4917 HD21 LEU B 112 | 6010    | 6200    | 4910   | -1400 | -430  | -1030 | H0 |
| ATOM 4918 HD22 LEU B 112   | -59.889 | -15.645 | 14.524 | 1.00  | 46.11 |       | H0 |
| ANISOU 4918 HD22 LEU B 112 | 5910    | 6510    | 5100   | -1550 | -550  | -1040 | H0 |
| ATOM 4919 HD23 LEU B 112   | -58.940 | -15.163 | 15.703 | 1.00  | 43.99 |       | H0 |
| ANISOU 4919 HD23 LEU B 112 | 5630    | 6180    | 4910   | -1400 | -400  | -930  | H0 |
| ATOM 4920 N TYR B 113      | -55.459 | -10.594 | 15.272 | 1.00  | 35.87 |       | N0 |
| ANISOU 4920 N TYR B 113    | 4500    | 5330    | 3800   | -700  | -250  | -630  | N0 |
| ATOM 4921 CA TYR B 113     | -54.153 | -10.081 | 15.746 | 1.00  | 35.03 |       | C0 |
| ANISOU 4921 CA TYR B 113   | 4420    | 5180    | 3710   | -590  | -160  | -560  | C0 |
| ATOM 4922 C TYR B 113      | -54.104 | -10.249 | 17.267 | 1.00  | 34.35 |       | C0 |
| ANISOU 4922 C TYR B 113    | 4280    | 5040    | 3730   | -610  | -100  | -530  | C0 |
| ATOM 4923 O TYR B 113      | -54.802 | -9.504  | 17.965 | 1.00  | 33.44 |       | O0 |
| ANISOU 4923 O TYR B 113    | 4050    | 4990    | 3670   | -620  | -120  | -490  | O0 |
| ATOM 4924 CB TYR B 113     | -53.942 | -8.636  | 15.286 | 1.00  | 34.91 |       | C0 |
| ANISOU 4924 CB TYR B 113   | 4350    | 5250    | 3670   | -500  | -170  | -490  | C0 |
| ATOM 4925 CG TYR B 113     | -52.680 | -8.008  | 15.814 | 1.00  | 34.86 |       | C0 |
| ANISOU 4925 CG TYR B 113   | 4340    | 5210    | 3690   | -420  | -90   | -420  | C0 |
| ATOM 4926 CD1 TYR B 113    | -51.458 | -8.646  | 15.682 | 1.00  | 35.37 |       | C0 |
| ANISOU 4926 CD1 TYR B 113  | 4490    | 5220    | 3730   | -380  | -10   | -410  | C0 |
| ATOM 4927 CD2 TYR B 113    | -52.708 | -6.795  | 16.481 | 1.00  | 35.19 |       | C0 |
| ANISOU 4927 CD2 TYR B 113  | 4310    | 5270    | 3790   | -390  | -90   | -350  | C0 |
| ATOM 4928 CE1 TYR B 113    | -50.294 | -8.086  | 16.184 | 1.00  | 35.67 |       | C0 |
| ANISOU 4928 CE1 TYR B 113  | 4500    | 5250    | 3810   | -320  | 60    | -340  | C0 |
| ATOM 4929 CE2 TYR B 113    | -51.555 | -6.221  | 16.992 | 1.00  | 34.65 |       | C0 |
| ANISOU 4929 CE2 TYR B 113  | 4230    | 5180    | 3750   | -340  | -20   | -290  | C0 |
| ATOM 4930 CZ TYR B 113     | -50.342 | -6.869  | 16.845 | 1.00  | 34.88 |       | C0 |
| ANISOU 4930 CZ TYR B 113   | 4310    | 5170    | 3760   | -320  | 50    | -280  | C0 |
| ATOM 4931 OH TYR B 113     | -49.202 | -6.307  | 17.345 | 1.00  | 34.57 |       | O0 |
| ANISOU 4931 OH TYR B 113   | 4240    | 5130    | 3760   | -290  | 100   | -220  | O0 |
| ATOM 4932 H TYR B 113      | -56.158 | -10.101 | 15.584 | 1.00  | 36.05 |       | H0 |
| ANISOU 4932 H TYR B 113    | 4420    | 5420    | 3860   | -720  | -290  | -610  | H0 |
| ATOM 4933 HA TYR B 113     | -53.437 | -10.639 | 15.351 | 1.00  | 35.28 |       | H0 |
| ANISOU 4933 HA TYR B 113   | 4550    | 5160    | 3690   | -560  | -120  | -580  | H0 |
| ATOM 4934 HB2 TYR B 113    | -53.919 | -8.622  | 14.307 | 1.00  | 35.66 |       | H0 |
| ANISOU 4934 HB2 TYR B 113  | 4500    | 5370    | 3690   | -480  | -210  | -510  | H0 |
| ATOM 4935 HB3 TYR B 113    | -54.711 | -8.102  | 15.577 | 1.00  | 35.05 |       | H0 |
| ANISOU 4935 HB3 TYR B 113  | 4280    | 5320    | 3720   | -510  | -220  | -480  | H0 |
| ATOM 4936 HD1 TYR B 113    | -51.414 | -9.477  | 15.238 | 1.00  | 36.05 |       | H0 |
| ANISOU 4936 HD1 TYR B 113  | 4650    | 5270    | 3780   | -390  | 0     | -460  | H0 |
| ATOM 4937 HD2 TYR B 113    | -53.531 | -6.348  | 16.592 | 1.00  | 35.10 |       | H0 |
| ANISOU 4937 HD2 TYR B 113  | 4240    | 5300    | 3790   | -390  | -130  | -350  | H0 |
| ATOM 4938 HE1 TYR B 113    | -49.471 | -8.533  | 16.079 | 1.00  | 35.51 |       | H0 |

|                           |         |         |        |       |       |      |    |
|---------------------------|---------|---------|--------|-------|-------|------|----|
| ANISOU 4938 HE1 TYR B 113 | 4510    | 5210    | 3770   | -280  | 110   | -340 | H0 |
| ATOM 4939 HE2 TYR B 113   | -51.595 | -5.391  | 17.439 | 1.00  | 34.30 |      | H0 |
| ANISOU 4939 HE2 TYR B 113 | 4150    | 5140    | 3740   | -330  | -30   | -250 | H0 |
| ATOM 4940 N MET B 114     | -53.301 | -11.202 | 17.745 | 1.00  | 34.60 |      | N0 |
| ANISOU 4940 N MET B 114   | 4400    | 4970    | 3770   | -600  | -20   | -530 | N0 |
| ATOM 4941 CA MET B 114    | -53.288 | -11.655 | 19.161 | 1.00  | 35.15 |      | C0 |
| ANISOU 4941 CA MET B 114  | 4460    | 4980    | 3910   | -620  | 30    | -510 | C0 |
| ATOM 4942 C MET B 114     | -51.866 | -11.548 | 19.706 | 1.00  | 32.55 |      | C0 |
| ANISOU 4942 C MET B 114   | 4160    | 4620    | 3590   | -510  | 100   | -450 | C0 |
| ATOM 4943 O MET B 114     | -51.240 | -12.551 | 20.029 | 1.00  | 32.45 |      | O0 |
| ANISOU 4943 O MET B 114   | 4250    | 4510    | 3570   | -490  | 160   | -460 | O0 |
| ATOM 4944 CB MET B 114    | -53.779 | -13.104 | 19.282 | 1.00  | 38.80 |      | C0 |
| ANISOU 4944 CB MET B 114  | 5020    | 5340    | 4370   | -730  | 50    | -570 | C0 |
| ATOM 4945 CG MET B 114    | -54.923 | -13.484 | 18.341 | 1.00  | 42.97 |      | C0 |
| ANISOU 4945 CG MET B 114  | 5550    | 5900    | 4870   | -850  | -40   | -650 | C0 |
| ATOM 4946 SD MET B 114    | -56.504 | -12.658 | 18.695 | 1.00  | 48.06 |      | S0 |
| ANISOU 4946 SD MET B 114  | 5990    | 6690    | 5580   | -950  | -110  | -630 | S0 |
| ATOM 4947 CE MET B 114    | -57.670 | -13.980 | 18.382 | 1.00  | 49.09 |      | C0 |
| ANISOU 4947 CE MET B 114  | 6150    | 6790    | 5710   | -1160 | -160  | -720 | C0 |
| ATOM 4948 H MET B 114     | -52.699 | -11.641 | 17.220 | 1.00  | 35.03 |      | H0 |
| ANISOU 4948 H MET B 114   | 4540    | 4990    | 3770   | -560  | 0     | -550 | H0 |
| ATOM 4949 HA MET B 114    | -53.874 | -11.063 | 19.687 | 1.00  | 34.75 |      | H0 |
| ANISOU 4949 HA MET B 114  | 4320    | 4980    | 3910   | -640  | 20    | -490 | H0 |
| ATOM 4950 HB2 MET B 114   | -53.027 | -13.702 | 19.113 | 1.00  | 38.97 |      | H0 |
| ANISOU 4950 HB2 MET B 114 | 5150    | 5290    | 4360   | -680  | 90    | -580 | H0 |
| ATOM 4951 HB3 MET B 114   | -54.070 | -13.254 | 20.204 | 1.00  | 38.68 |      | H0 |
| ANISOU 4951 HB3 MET B 114 | 4980    | 5310    | 4410   | -760  | 70    | -550 | H0 |
| ATOM 4952 HG2 MET B 114   | -54.661 | -13.274 | 17.420 | 1.00  | 43.48 |      | H0 |
| ANISOU 4952 HG2 MET B 114 | 5650    | 5990    | 4870   | -810  | -70   | -670 | H0 |
| ATOM 4953 HG3 MET B 114   | -55.063 | -14.454 | 18.393 | 1.00  | 44.09 |      | H0 |
| ANISOU 4953 HG3 MET B 114 | 5790    | 5960    | 5010   | -920  | -20   | -690 | H0 |
| ATOM 4954 HE1 MET B 114   | -58.568 | -13.625 | 18.391 | 1.00  | 49.83 |      | H0 |
| ANISOU 4954 HE1 MET B 114 | 6120    | 6980    | 5840   | -1220 | -210  | -720 | H0 |
| ATOM 4955 HE2 MET B 114   | -57.488 | -14.372 | 17.520 | 1.00  | 49.99 |      | H0 |
| ANISOU 4955 HE2 MET B 114 | 6360    | 6870    | 5760   | -1170 | -200  | -780 | H0 |
| ATOM 4956 HE3 MET B 114   | -57.583 | -14.652 | 19.068 | 1.00  | 49.55 |      | H0 |
| ANISOU 4956 HE3 MET B 114 | 6270    | 6750    | 5810   | -1200 | -100  | -720 | H0 |
| ATOM 4957 N PRO B 115     | -51.291 | -10.334 | 19.831 | 1.00  | 30.68 |      | N0 |
| ANISOU 4957 N PRO B 115   | 3850    | 4450    | 3370   | -450  | 100   | -400 | N0 |
| ATOM 4958 CA PRO B 115    | -49.960 | -10.190 | 20.414 | 1.00  | 30.53 |      | C0 |
| ANISOU 4958 CA PRO B 115  | 3820    | 4410    | 3360   | -370  | 150   | -340 | C0 |
| ATOM 4959 C PRO B 115     | -49.969 | -10.494 | 21.920 | 1.00  | 31.31 |      | C0 |
| ANISOU 4959 C PRO B 115   | 3910    | 4470    | 3510   | -370  | 180   | -320 | C0 |
| ATOM 4960 O PRO B 115     | -50.935 | -10.123 | 22.594 | 1.00  | 30.57 |      | O0 |
| ANISOU 4960 O PRO B 115   | 3770    | 4390    | 3450   | -430  | 160   | -320 | O0 |
| ATOM 4961 CB PRO B 115    | -49.614 | -8.717  | 20.181 | 1.00  | 29.72 |      | C0 |
| ANISOU 4961 CB PRO B 115  | 3640    | 4390    | 3260   | -340  | 130   | -290 | C0 |
| ATOM 4962 CG PRO B 115    | -50.963 | -8.042  | 20.123 | 1.00  | 30.12 |      | C0 |
| ANISOU 4962 CG PRO B 115  | 3640    | 4470    | 3330   | -390  | 70    | -310 | C0 |
| ATOM 4963 CD PRO B 115    | -51.882 | -9.045  | 19.452 | 1.00  | 30.54 |      | C0 |
| ANISOU 4963 CD PRO B 115  | 3740    | 4510    | 3350   | -450  | 50    | -370 | C0 |
| ATOM 4964 HA PRO B 115    | -49.315 | -10.771 | 19.939 | 1.00  | 31.02 |      | H0 |
| ANISOU 4964 HA PRO B 115  | 3950    | 4450    | 3390   | -320  | 190   | -350 | H0 |
| ATOM 4965 HB2 PRO B 115   | -49.073 | -8.358  | 20.917 | 1.00  | 29.56 |      | H0 |

|                           |         |         |        |      |       |      |    |
|---------------------------|---------|---------|--------|------|-------|------|----|
| ANISOU 4965 HB2 PRO B 115 | 3590    | 4370    | 3270   | -320 | 140   | -260 | H0 |
| ATOM 4966 HB3 PRO B 115   | -49.126 | -8.598  | 19.338 | 1.00 | 30.15 |      | H0 |
| ANISOU 4966 HB3 PRO B 115 | 3710    | 4460    | 3280   | -310 | 140   | -290 | H0 |
| ATOM 4967 HG2 PRO B 115   | -51.283 | -7.829  | 21.024 | 1.00 | 29.65 |      | H0 |
| ANISOU 4967 HG2 PRO B 115 | 3550    | 4410    | 3310   | -410 | 70    | -300 | H0 |
| ATOM 4968 HG3 PRO B 115   | -50.915 | -7.214  | 19.604 | 1.00 | 29.91 |      | H0 |
| ANISOU 4968 HG3 PRO B 115 | 3600    | 4480    | 3290   | -380 | 50    | -290 | H0 |
| ATOM 4969 HD2 PRO B 115   | -52.795 | -8.965  | 19.784 | 1.00 | 30.71 |      | H0 |
| ANISOU 4969 HD2 PRO B 115 | 3720    | 4550    | 3400   | -500 | 20    | -390 | H0 |
| ATOM 4970 HD3 PRO B 115   | -51.882 | -8.930  | 18.484 | 1.00 | 30.96 |      | H0 |
| ANISOU 4970 HD3 PRO B 115 | 3820    | 4590    | 3350   | -440 | 30    | -390 | H0 |
| ATOM 4971 N SER B 116     | -48.923 | -11.175 | 22.395 | 1.00 | 31.31 |      | N0 |
| ANISOU 4971 N SER B 116   | 3960    | 4430    | 3500   | -300 | 220   | -300 | N0 |
| ATOM 4972 CA SER B 116    | -48.601 | -11.304 | 23.834 | 1.00 | 31.48 |      | C0 |
| ANISOU 4972 CA SER B 116  | 3970    | 4430    | 3550   | -270 | 240   | -260 | C0 |
| ATOM 4973 C SER B 116     | -47.788 | -10.080 | 24.248 | 1.00 | 31.11 |      | C0 |
| ANISOU 4973 C SER B 116   | 3830    | 4460    | 3530   | -240 | 210   | -210 | C0 |
| ATOM 4974 O SER B 116     | -46.736 | -9.823  | 23.630 | 1.00 | 31.35 |      | O0 |
| ANISOU 4974 O SER B 116   | 3830    | 4540    | 3540   | -190 | 220   | -190 | O0 |
| ATOM 4975 CB SER B 116    | -47.876 | -12.569 | 24.152 | 1.00 | 32.53 |      | C0 |
| ANISOU 4975 CB SER B 116  | 4210    | 4490    | 3660   | -200 | 290   | -250 | C0 |
| ATOM 4976 OG SER B 116    | -47.853 | -12.758 | 25.556 | 1.00 | 32.91 |      | O0 |
| ANISOU 4976 OG SER B 116  | 4270    | 4510    | 3720   | -180 | 300   | -210 | O0 |
| ATOM 4977 H SER B 116     | -48.325 | -11.612 | 21.864 | 1.00 | 31.80 |      | H0 |
| ANISOU 4977 H SER B 116   | 4060    | 4480    | 3540   | -250 | 250   | -300 | H0 |
| ATOM 4978 HA SER B 116    | -49.456 | -11.298 | 24.343 | 1.00 | 31.43 |      | H0 |
| ANISOU 4978 HA SER B 116  | 3970    | 4410    | 3570   | -330 | 230   | -270 | H0 |
| ATOM 4979 HB2 SER B 116   | -48.329 | -13.328 | 23.721 | 1.00 | 33.02 |      | H0 |
| ANISOU 4979 HB2 SER B 116 | 4350    | 4490    | 3710   | -230 | 310   | -290 | H0 |
| ATOM 4980 HB3 SER B 116   | -46.955 | -12.519 | 23.808 | 1.00 | 32.68 |      | H0 |
| ANISOU 4980 HB3 SER B 116 | 4210    | 4540    | 3660   | -130 | 300   | -230 | H0 |
| ATOM 4981 N ILE B 117     | -48.288 | -9.347  | 25.239 | 1.00 | 30.60 |      | N0 |
| ANISOU 4981 N ILE B 117   | 3730    | 4410    | 3490   | -270 | 180   | -200 | N0 |
| ATOM 4982 CA ILE B 117    | -47.733 | -8.035  | 25.659 | 1.00 | 30.57 |      | C0 |
| ANISOU 4982 CA ILE B 117  | 3660    | 4460    | 3500   | -270 | 140   | -170 | C0 |
| ATOM 4983 C ILE B 117     | -47.365 | -8.103  | 27.142 | 1.00 | 31.14 |      | C0 |
| ANISOU 4983 C ILE B 117   | 3740    | 4520    | 3570   | -240 | 130   | -150 | C0 |
| ATOM 4984 O ILE B 117     | -48.182 | -8.619  | 27.947 | 1.00 | 30.47 |      | O0 |
| ANISOU 4984 O ILE B 117   | 3710    | 4390    | 3480   | -250 | 150   | -160 | O0 |
| ATOM 4985 CB ILE B 117    | -48.743 | -6.917  | 25.352 | 1.00 | 30.49 |      | C0 |
| ANISOU 4985 CB ILE B 117  | 3620    | 4460    | 3500   | -320 | 110   | -180 | C0 |
| ATOM 4986 CG1 ILE B 117   | -48.895 | -6.730  | 23.838 | 1.00 | 31.07 |      | C0 |
| ANISOU 4986 CG1 ILE B 117 | 3680    | 4560    | 3560   | -330 | 110   | -190 | C0 |
| ATOM 4987 CG2 ILE B 117   | -48.331 | -5.630  | 26.052 | 1.00 | 30.42 |      | C0 |
| ANISOU 4987 CG2 ILE B 117 | 3590    | 4470    | 3500   | -320 | 70    | -160 | C0 |
| ATOM 4988 CD1 ILE B 117   | -50.041 | -5.839  | 23.425 | 1.00 | 31.38 |      | C0 |
| ANISOU 4988 CD1 ILE B 117 | 3700    | 4620    | 3600   | -350 | 80    | -200 | C0 |
| ATOM 4989 H ILE B 117     | -49.009 | -9.608  | 25.730 | 1.00 | 30.72 |      | H0 |
| ANISOU 4989 H ILE B 117   | 3770    | 4400    | 3510   | -300 | 190   | -210 | H0 |
| ATOM 4990 HA ILE B 117    | -46.924 | -7.864  | 25.147 | 1.00 | 30.79 |      | H0 |
| ANISOU 4990 HA ILE B 117  | 3660    | 4520    | 3520   | -250 | 140   | -150 | H0 |
| ATOM 4991 HB ILE B 117    | -49.621 | -7.194  | 25.712 | 1.00 | 30.55 |      | H0 |
| ANISOU 4991 HB ILE B 117  | 3640    | 4450    | 3510   | -340 | 120   | -200 | H0 |
| ATOM 4992 HG12 ILE B 117  | -48.062 | -6.351  | 23.485 | 1.00 | 31.11 |      | H0 |

|                            |         |        |        |      |       |      |    |
|----------------------------|---------|--------|--------|------|-------|------|----|
| ANISOU 4992 HG12 ILE B 117 | 3670    | 4590   | 3560   | -320 | 110   | -170 | H0 |
| ATOM 4993 HG13 ILE B 117   | -49.020 | -7.611 | 23.425 | 1.00 | 31.26 |      | H0 |
| ANISOU 4993 HG13 ILE B 117 | 3740    | 4570   | 3570   | -330 | 130   | -210 | H0 |
| ATOM 4994 HG21 ILE B 117   | -48.558 | -5.685 | 26.997 | 1.00 | 30.41 |      | H0 |
| ANISOU 4994 HG21 ILE B 117 | 3610    | 4450   | 3500   | -320 | 70    | -160 | H0 |
| ATOM 4995 HG22 ILE B 117   | -48.799 | -4.877 | 25.654 | 1.00 | 30.36 |      | H0 |
| ANISOU 4995 HG22 ILE B 117 | 3570    | 4460   | 3500   | -340 | 60    | -160 | H0 |
| ATOM 4996 HG23 ILE B 117   | -47.372 | -5.499 | 25.958 | 1.00 | 30.55 |      | H0 |
| ANISOU 4996 HG23 ILE B 117 | 3580    | 4510   | 3520   | -320 | 70    | -140 | H0 |
| ATOM 4997 HD11 ILE B 117   | -50.838 | -6.078 | 23.930 | 1.00 | 31.28 |      | H0 |
| ANISOU 4997 HD11 ILE B 117 | 3690    | 4600   | 3600   | -370 | 80    | -220 | H0 |
| ATOM 4998 HD12 ILE B 117   | -50.216 | -5.953 | 22.474 | 1.00 | 31.45 |      | H0 |
| ANISOU 4998 HD12 ILE B 117 | 3720    | 4640   | 3590   | -360 | 70    | -210 | H0 |
| ATOM 4999 HD13 ILE B 117   | -49.813 | -4.910 | 23.602 | 1.00 | 31.17 |      | H0 |
| ANISOU 4999 HD13 ILE B 117 | 3670    | 4590   | 3580   | -350 | 60    | -180 | H0 |
| ATOM 5000 N ARG B 118      | -46.168 | -7.625 | 27.478 | 1.00 | 31.37 |      | N0 |
| ANISOU 5000 N ARG B 118    | 3720    | 4600   | 3600   | -220 | 100   | -120 | N0 |
| ATOM 5001 CA ARG B 118     | -45.808 | -7.242 | 28.863 | 1.00 | 31.92 |      | C0 |
| ANISOU 5001 CA ARG B 118   | 3800    | 4680   | 3650   | -210 | 50    | -100 | C0 |
| ATOM 5002 C ARG B 118      | -45.882 | -5.716 | 28.951 | 1.00 | 31.71 |      | C0 |
| ANISOU 5002 C ARG B 118    | 3740    | 4670   | 3640   | -270 | 0     | -110 | C0 |
| ATOM 5003 O ARG B 118      | -45.277 | -5.047 | 28.088 | 1.00 | 30.69 |      | O0 |
| ANISOU 5003 O ARG B 118    | 3560    | 4570   | 3530   | -310 | -20   | -100 | O0 |
| ATOM 5004 CB ARG B 118     | -44.421 | -7.747 | 29.256 | 1.00 | 33.46 |      | C0 |
| ANISOU 5004 CB ARG B 118   | 3950    | 4930   | 3830   | -140 | 30    | -60  | C0 |
| ATOM 5005 CG ARG B 118     | -44.022 | -7.340 | 30.668 | 1.00 | 34.13 |      | C0 |
| ANISOU 5005 CG ARG B 118   | 4040    | 5040   | 3880   | -130 | -40   | -60  | C0 |
| ATOM 5006 CD ARG B 118     | -42.776 | -8.046 | 31.151 | 1.00 | 35.94 |      | C0 |
| ANISOU 5006 CD ARG B 118   | 4230    | 5340   | 4090   | -50  | -70   | -10  | C0 |
| ATOM 5007 NE ARG B 118     | -42.406 | -7.611 | 32.490 | 1.00 | 37.53 |      | N0 |
| ANISOU 5007 NE ARG B 118   | 4440    | 5570   | 4250   | -40  | -160  | -10  | N0 |
| ATOM 5008 CZ ARG B 118     | -41.502 | -8.204 | 33.264 | 1.00 | 39.02 |      | C0 |
| ANISOU 5008 CZ ARG B 118   | 4610    | 5820   | 4390   | 50   | -210  | 20   | C0 |
| ATOM 5009 NH1 ARG B 118    | -40.878 | -9.288 | 32.841 | 1.00 | 40.38 |      | N0 |
| ANISOU 5009 NH1 ARG B 118  | 4760    | 6030   | 4560   | 160  | -160  | 60   | N0 |
| ATOM 5010 NH2 ARG B 118    | -41.228 | -7.717 | 34.465 | 1.00 | 39.59 |      | N0 |
| ANISOU 5010 NH2 ARG B 118  | 4710    | 5930   | 4410   | 40   | -300  | 20   | N0 |
| ATOM 5011 H ARG B 118      | -45.496 | -7.508 | 26.874 | 1.00 | 31.61 |      | H0 |
| ANISOU 5011 H ARG B 118    | 3710    | 4670   | 3630   | -210 | 100   | -100 | H0 |
| ATOM 5012 HA ARG B 118     | -46.471 | -7.628 | 29.476 | 1.00 | 31.95 |      | H0 |
| ANISOU 5012 HA ARG B 118   | 3860    | 4640   | 3640   | -200 | 70    | -110 | H0 |
| ATOM 5013 HB2 ARG B 118    | -44.411 | -8.725 | 29.191 | 1.00 | 33.51 |      | H0 |
| ANISOU 5013 HB2 ARG B 118  | 4000    | 4910   | 3820   | -90  | 70    | -60  | H0 |
| ATOM 5014 HB3 ARG B 118    | -43.763 | -7.393 | 28.623 | 1.00 | 33.48 |      | H0 |
| ANISOU 5014 HB3 ARG B 118  | 3890    | 4980   | 3850   | -150 | 20    | -50  | H0 |
| ATOM 5015 HG2 ARG B 118    | -43.866 | -6.373 | 30.694 | 1.00 | 34.30 |      | H0 |
| ANISOU 5015 HG2 ARG B 118  | 4030    | 5080   | 3920   | -190 | -90   | -60  | H0 |
| ATOM 5016 HG3 ARG B 118    | -44.759 | -7.543 | 31.282 | 1.00 | 34.15 |      | H0 |
| ANISOU 5016 HG3 ARG B 118  | 4120    | 4990   | 3860   | -130 | -30   | -70  | H0 |
| ATOM 5017 HD2 ARG B 118    | -42.937 | -9.013 | 31.155 | 1.00 | 36.08 |      | H0 |
| ANISOU 5017 HD2 ARG B 118  | 4300    | 5320   | 4090   | 20   | -30   | 0    | H0 |
| ATOM 5018 HD3 ARG B 118    | -42.037 | -7.863 | 30.532 | 1.00 | 36.24 |      | H0 |
| ANISOU 5018 HD3 ARG B 118  | 4180    | 5440   | 4150   | -50  | -80   | 0    | H0 |
| ATOM 5019 HE ARG B 118     | -42.788 | -6.894 | 32.798 | 1.00 | 37.27 |      | H0 |

|                            |         |        |        |      |       |      |    |
|----------------------------|---------|--------|--------|------|-------|------|----|
| ANISOU 5019 HE ARG B 118   | 4430    | 5520   | 4210   | -100 | -180  | -40  | H0 |
| ATOM 5020 HH11 ARG B 118   | -41.050 | -9.618 | 32.047 | 1.00 | 39.72 |      | H0 |
| ANISOU 5020 HH11 ARG B 118 | 4670    | 5910   | 4500   | 170  | -100  | 60   | H0 |
| ATOM 5021 HH12 ARG B 118   | -40.285 | -9.680 | 33.359 | 1.00 | 40.78 |      | H0 |
| ANISOU 5021 HH12 ARG B 118 | 4790    | 6120   | 4580   | 230  | -200  | 90   | H0 |
| ATOM 5022 HH21 ARG B 118   | -41.641 | -6.996 | 34.752 | 1.00 | 39.37 |      | H0 |
| ANISOU 5022 HH21 ARG B 118 | 4710    | 5870   | 4370   | -30  | -320  | -10  | H0 |
| ATOM 5023 HH22 ARG B 118   | -40.634 | -8.118 | 34.976 | 1.00 | 40.34 |      | H0 |
| ANISOU 5023 HH22 ARG B 118 | 4790    | 6070   | 4470   | 100  | -340  | 40   | H0 |
| ATOM 5024 N GLN B 119      | -46.615 | -5.201 | 29.943 | 1.00 | 31.03 |      | N0 |
| ANISOU 5024 N GLN B 119    | 3710    | 4540   | 3530   | -280 | -20   | -130 | N0 |
| ATOM 5025 CA GLN B 119     | -46.849 | -3.749 | 30.142 | 1.00 | 30.83 |      | C0 |
| ANISOU 5025 CA GLN B 119   | 3710    | 4500   | 3510   | -330 | -60   | -150 | C0 |
| ATOM 5026 C GLN B 119      | -47.040 | -3.461 | 31.631 | 1.00 | 31.32 |      | C0 |
| ANISOU 5026 C GLN B 119    | 3850    | 4540   | 3520   | -310 | -90   | -170 | C0 |
| ATOM 5027 O GLN B 119      | -47.570 | -4.337 | 32.352 | 1.00 | 31.87 |      | O0 |
| ANISOU 5027 O GLN B 119    | 3960    | 4590   | 3560   | -260 | -50   | -160 | O0 |
| ATOM 5028 CB GLN B 119     | -48.069 | -3.312 | 29.335 | 1.00 | 30.50 |      | C0 |
| ANISOU 5028 CB GLN B 119   | 3680    | 4430   | 3480   | -330 | -20   | -160 | C0 |
| ATOM 5029 CG GLN B 119     | -48.080 | -1.829 | 28.999 | 1.00 | 30.94 |      | C0 |
| ANISOU 5029 CG GLN B 119   | 3760    | 4450   | 3540   | -370 | -60   | -170 | C0 |
| ATOM 5030 CD GLN B 119     | -49.095 | -1.493 | 27.932 | 1.00 | 30.70 |      | C0 |
| ANISOU 5030 CD GLN B 119   | 3720    | 4420   | 3530   | -350 | -30   | -170 | C0 |
| ATOM 5031 OE1 GLN B 119    | -49.983 | -2.286 | 27.623 | 1.00 | 30.54 |      | O0 |
| ANISOU 5031 OE1 GLN B 119  | 3670    | 4420   | 3510   | -320 | 10    | -170 | O0 |
| ATOM 5032 NE2 GLN B 119    | -48.971 | -0.302 | 27.368 | 1.00 | 31.02 |      | N0 |
| ANISOU 5032 NE2 GLN B 119  | 3790    | 4430   | 3570   | -370 | -50   | -150 | N0 |
| ATOM 5033 H GLN B 119      | -47.025 | -5.724 | 30.567 | 1.00 | 31.16 |      | H0 |
| ANISOU 5033 H GLN B 119    | 3770    | 4540   | 3530   | -260 | 0     | -130 | H0 |
| ATOM 5034 HA GLN B 119     | -46.058 | -3.257 | 29.822 | 1.00 | 31.15 |      | H0 |
| ANISOU 5034 HA GLN B 119   | 3710    | 4560   | 3560   | -360 | -100  | -140 | H0 |
| ATOM 5035 HB2 GLN B 119    | -48.091 | -3.829 | 28.503 | 1.00 | 30.36 |      | H0 |
| ANISOU 5035 HB2 GLN B 119  | 3630    | 4430   | 3480   | -330 | 0     | -160 | H0 |
| ATOM 5036 HB3 GLN B 119    | -48.876 | -3.531 | 29.844 | 1.00 | 30.52 |      | H0 |
| ANISOU 5036 HB3 GLN B 119  | 3710    | 4410   | 3470   | -310 | 0     | -180 | H0 |
| ATOM 5037 HG2 GLN B 119    | -48.284 | -1.315 | 29.809 | 1.00 | 31.13 |      | H0 |
| ANISOU 5037 HG2 GLN B 119  | 3830    | 4450   | 3540   | -360 | -80   | -180 | H0 |
| ATOM 5038 HG3 GLN B 119    | -47.188 | -1.561 | 28.689 | 1.00 | 31.08 |      | H0 |
| ANISOU 5038 HG3 GLN B 119  | 3750    | 4490   | 3570   | -400 | -90   | -150 | H0 |
| ATOM 5039 HE21 GLN B 119   | -49.583 | -0.017 | 26.796 | 1.00 | 31.02 |      | H0 |
| ANISOU 5039 HE21 GLN B 119 | 3800    | 4420   | 3570   | -350 | -40   | -150 | H0 |
| ATOM 5040 HE22 GLN B 119   | -48.277 | 0.211  | 27.561 | 1.00 | 31.30 |      | H0 |
| ANISOU 5040 HE22 GLN B 119 | 3850    | 4440   | 3610   | -410 | -80   | -150 | H0 |
| ATOM 5041 N ARG B 120      | -46.637 | -2.271 | 32.069 | 1.00 | 32.19 |      | N0 |
| ANISOU 5041 N ARG B 120    | 3990    | 4630   | 3610   | -350 | -150  | -180 | N0 |
| ATOM 5042 CA ARG B 120     | -46.789 | -1.811 | 33.472 | 1.00 | 33.67 |      | C0 |
| ANISOU 5042 CA ARG B 120   | 4280    | 4780   | 3730   | -330 | -190  | -220 | C0 |
| ATOM 5043 C ARG B 120      | -47.990 | -0.864 | 33.531 | 1.00 | 33.06 |      | C0 |
| ANISOU 5043 C ARG B 120    | 4280    | 4640   | 3640   | -310 | -150  | -250 | C0 |
| ATOM 5044 O ARG B 120      | -48.153 | -0.043 | 32.609 | 1.00 | 32.66 |      | O0 |
| ANISOU 5044 O ARG B 120    | 4220    | 4560   | 3630   | -340 | -160  | -250 | O0 |
| ATOM 5045 CB ARG B 120     | -45.485 | -1.172 | 33.962 | 1.00 | 36.20 |      | C0 |
| ANISOU 5045 CB ARG B 120   | 4600    | 5120   | 4030   | -400 | -300  | -220 | C0 |
| ATOM 5046 CG ARG B 120     | -45.421 | -1.007 | 35.473 | 1.00 | 39.21 |      | C0 |



|                            |         |        |        |      |       |      |    |
|----------------------------|---------|--------|--------|------|-------|------|----|
| ANISOU 5046 CG ARG B 120   | 5080    | 5490   | 4320   | -370 | -360  | -260 | C0 |
| ATOM 5047 CD ARG B 120     | -44.014 | -0.855 | 36.018 | 1.00 | 41.14 |      | C0 |
| ANISOU 5047 CD ARG B 120   | 5290    | 5800   | 4540   | -430 | -480  | -260 | C0 |
| ATOM 5048 NE ARG B 120     | -44.006 | -0.873 | 37.478 | 1.00 | 42.86 |      | N0 |
| ANISOU 5048 NE ARG B 120   | 5620    | 6010   | 4650   | -390 | -540  | -290 | N0 |
| ATOM 5049 CZ ARG B 120     | -44.131 | -1.963 | 38.235 | 1.00 | 43.38 |      | C0 |
| ANISOU 5049 CZ ARG B 120   | 5710    | 6120   | 4650   | -280 | -520  | -270 | C0 |
| ATOM 5050 NH1 ARG B 120    | -44.294 | -3.150 | 37.678 | 1.00 | 42.40 |      | N0 |
| ANISOU 5050 NH1 ARG B 120  | 5510    | 6020   | 4570   | -220 | -430  | -210 | N0 |
| ATOM 5051 NH2 ARG B 120    | -44.104 | -1.864 | 39.555 | 1.00 | 45.22 |      | N0 |
| ANISOU 5051 NH2 ARG B 120  | 6070    | 6340   | 4770   | -240 | -570  | -290 | N0 |
| ATOM 5052 H ARG B 120      | -46.239 | -1.658 | 31.525 | 1.00 | 32.41 |      | H0 |
| ANISOU 5052 H ARG B 120    | 4000    | 4660   | 3660   | -390 | -180  | -180 | H0 |
| ATOM 5053 HA ARG B 120     | -46.981 | -2.595 | 34.032 | 1.00 | 33.69 |      | H0 |
| ANISOU 5053 HA ARG B 120   | 4300    | 4800   | 3710   | -280 | -170  | -210 | H0 |
| ATOM 5054 HB2 ARG B 120    | -44.733 | -1.730 | 33.670 | 1.00 | 36.34 |      | H0 |
| ANISOU 5054 HB2 ARG B 120  | 4530    | 5200   | 4070   | -400 | -320  | -200 | H0 |
| ATOM 5055 HB3 ARG B 120    | -45.389 | -0.292 | 33.541 | 1.00 | 36.47 |      | H0 |
| ANISOU 5055 HB3 ARG B 120  | 4640    | 5130   | 4090   | -450 | -320  | -230 | H0 |
| ATOM 5056 HG2 ARG B 120    | -45.943 | -0.219 | 35.728 | 1.00 | 39.08 |      | H0 |
| ANISOU 5056 HG2 ARG B 120  | 5160    | 5410   | 4280   | -380 | -360  | -290 | H0 |
| ATOM 5057 HG3 ARG B 120    | -45.838 | -1.787 | 35.895 | 1.00 | 38.69 |      | H0 |
| ANISOU 5057 HG3 ARG B 120  | 5040    | 5430   | 4230   | -300 | -310  | -250 | H0 |
| ATOM 5058 HD2 ARG B 120    | -43.450 | -1.582 | 35.678 | 1.00 | 41.01 |      | H0 |
| ANISOU 5058 HD2 ARG B 120  | 5170    | 5850   | 4550   | -410 | -480  | -220 | H0 |
| ATOM 5059 HD3 ARG B 120    | -43.635 | -0.006 | 35.703 | 1.00 | 41.51 |      | H0 |
| ANISOU 5059 HD3 ARG B 120  | 5330    | 5830   | 4610   | -510 | -530  | -280 | H0 |
| ATOM 5060 HE ARG B 120     | -43.899 | -0.111 | 37.888 | 1.00 | 43.45 |      | H0 |
| ANISOU 5060 HE ARG B 120   | 5760    | 6050   | 4690   | -430 | -600  | -330 | H0 |
| ATOM 5061 HH11 ARG B 120   | -44.313 | -3.231 | 36.806 | 1.00 | 41.90 |      | H0 |
| ANISOU 5061 HH11 ARG B 120 | 5380    | 5960   | 4580   | -240 | -400  | -200 | H0 |
| ATOM 5062 HH12 ARG B 120   | -44.379 | -3.860 | 38.188 | 1.00 | 42.64 |      | H0 |
| ANISOU 5062 HH12 ARG B 120 | 5580    | 6060   | 4560   | -160 | -410  | -190 | H0 |
| ATOM 5063 HH21 ARG B 120   | -43.999 | -1.075 | 39.935 | 1.00 | 45.48 |      | H0 |
| ANISOU 5063 HH21 ARG B 120 | 6170    | 6350   | 4760   | -290 | -630  | -340 | H0 |
| ATOM 5064 HH22 ARG B 120   | -44.193 | -2.585 | 40.053 | 1.00 | 44.98 |      | H0 |
| ANISOU 5064 HH22 ARG B 120 | 6060    | 6330   | 4690   | -170 | -550  | -270 | H0 |
| ATOM 5065 N PHE B 121      | -48.829 | -1.001 | 34.555 | 1.00 | 33.13 |      | N0 |
| ANISOU 5065 N PHE B 121    | 4370    | 4620   | 3590   | -240 | -110  | -260 | N0 |
| ATOM 5066 CA PHE B 121     | -50.092 | -0.234 | 34.695 | 1.00 | 33.01 |      | C0 |
| ANISOU 5066 CA PHE B 121   | 4420    | 4560   | 3560   | -180 | -60   | -290 | C0 |
| ATOM 5067 C PHE B 121      | -50.098 | 0.524  | 36.020 | 1.00 | 33.99 |      | C0 |
| ANISOU 5067 C PHE B 121    | 4690    | 4630   | 3590   | -150 | -80   | -330 | C0 |
| ATOM 5068 O PHE B 121      | -49.560 | 0.016  | 37.026 | 1.00 | 33.80 |      | O0 |
| ANISOU 5068 O PHE B 121    | 4710    | 4630   | 3500   | -140 | -110  | -340 | O0 |
| ATOM 5069 CB PHE B 121     | -51.293 | -1.169 | 34.547 | 1.00 | 33.16 |      | C0 |
| ANISOU 5069 CB PHE B 121   | 4380    | 4630   | 3600   | -130 | 50    | -260 | C0 |
| ATOM 5070 CG PHE B 121     | -51.453 | -1.714 | 33.150 | 1.00 | 31.89 |      | C0 |
| ANISOU 5070 CG PHE B 121   | 4100    | 4500   | 3520   | -170 | 70    | -240 | C0 |
| ATOM 5071 CD1 PHE B 121    | -52.105 | -0.974 | 32.182 | 1.00 | 31.96 |      | C0 |
| ANISOU 5071 CD1 PHE B 121  | 4070    | 4510   | 3560   | -160 | 70    | -240 | C0 |
| ATOM 5072 CD2 PHE B 121    | -50.913 | -2.940 | 32.793 | 1.00 | 31.70 |      | C0 |
| ANISOU 5072 CD2 PHE B 121  | 4010    | 4510   | 3520   | -210 | 70    | -220 | C0 |
| ATOM 5073 CE1 PHE B 121    | -52.227 | -1.452 | 30.886 | 1.00 | 31.82 |      | C0 |

|                           |         |        |        |      |       |      |    |
|---------------------------|---------|--------|--------|------|-------|------|----|
| ANISOU 5073 CE1 PHE B 121 | 3960    | 4530   | 3600   | -200 | 70    | -220 | C0 |
| ATOM 5074 CE2 PHE B 121   | -51.033 | -3.416 | 31.494 | 1.00 | 31.73 |      | C0 |
| ANISOU 5074 CE2 PHE B 121 | 3940    | 4540   | 3580   | -240 | 80    | -200 | C0 |
| ATOM 5075 CZ PHE B 121    | -51.690 | -2.672 | 30.543 | 1.00 | 31.45 |      | C0 |
| ANISOU 5075 CZ PHE B 121  | 3870    | 4510   | 3570   | -240 | 80    | -210 | C0 |
| ATOM 5076 H PHE B 121     | -48.689 | -1.575 | 35.248 | 1.00 | 33.28 |      | H0 |
| ANISOU 5076 H PHE B 121   | 4410    | 4660   | 3570   | -220 | -110  | -260 | H0 |
| ATOM 5077 HA PHE B 121    | -50.132 | 0.432  | 33.963 | 1.00 | 33.09 |      | H0 |
| ANISOU 5077 HA PHE B 121  | 4420    | 4550   | 3600   | -200 | -70   | -290 | H0 |
| ATOM 5078 HB2 PHE B 121   | -51.188 | -1.916 | 35.171 | 1.00 | 33.01 |      | H0 |
| ANISOU 5078 HB2 PHE B 121 | 4370    | 4620   | 3550   | -130 | 70    | -250 | H0 |
| ATOM 5079 HB3 PHE B 121   | -52.105 | -0.680 | 34.796 | 1.00 | 33.26 |      | H0 |
| ANISOU 5079 HB3 PHE B 121 | 4420    | 4630   | 3590   | -80  | 90    | -280 | H0 |
| ATOM 5080 HD1 PHE B 121   | -52.469 | -0.133 | 32.406 | 1.00 | 32.43 |      | H0 |
| ANISOU 5080 HD1 PHE B 121 | 4180    | 4540   | 3600   | -120 | 70    | -250 | H0 |
| ATOM 5081 HD2 PHE B 121   | -50.452 | -3.450 | 33.438 | 1.00 | 31.93 |      | H0 |
| ANISOU 5081 HD2 PHE B 121 | 4070    | 4540   | 3520   | -200 | 60    | -210 | H0 |
| ATOM 5082 HE1 PHE B 121   | -52.680 | -0.941 | 30.243 | 1.00 | 31.81 |      | H0 |
| ANISOU 5082 HE1 PHE B 121 | 3940    | 4530   | 3610   | -180 | 70    | -220 | H0 |
| ATOM 5083 HE2 PHE B 121   | -50.668 | -4.254 | 31.265 | 1.00 | 31.40 |      | H0 |
| ANISOU 5083 HE2 PHE B 121 | 3870    | 4510   | 3550   | -260 | 90    | -190 | H0 |
| ATOM 5084 HZ PHE B 121    | -51.783 | -3.001 | 29.663 | 1.00 | 31.25 |      | H0 |
| ANISOU 5084 HZ PHE B 121  | 3790    | 4510   | 3570   | -260 | 80    | -200 | H0 |
| ATOM 5085 N SER B 122     | -50.648 | 1.740  | 35.979 | 1.00 | 34.38 |      | N0 |
| ANISOU 5085 N SER B 122   | 4830    | 4610   | 3620   | -110 | -80   | -360 | N0 |
| ATOM 5086 CA SER B 122    | -51.129 | 2.514  | 37.150 | 1.00 | 35.22 |      | C0 |
| ANISOU 5086 CA SER B 122  | 5110    | 4650   | 3620   | -30  | -60   | -410 | C0 |
| ATOM 5087 C SER B 122     | -52.583 | 2.112  | 37.421 | 1.00 | 34.92 |      | C0 |
| ANISOU 5087 C SER B 122   | 5040    | 4660   | 3570   | 90   | 70    | -390 | C0 |
| ATOM 5088 O SER B 122     | -53.445 | 2.460  | 36.606 | 1.00 | 34.30 |      | O0 |
| ANISOU 5088 O SER B 122   | 4900    | 4590   | 3540   | 130  | 130   | -380 | O0 |
| ATOM 5089 CB SER B 122    | -51.001 | 3.998  | 36.908 | 1.00 | 35.72 |      | C0 |
| ANISOU 5089 CB SER B 122  | 5300    | 4600   | 3670   | -50  | -110  | -450 | C0 |
| ATOM 5090 OG SER B 122    | -51.617 | 4.738  | 37.952 | 1.00 | 36.42 |      | O0 |
| ANISOU 5090 OG SER B 122  | 5570    | 4620   | 3650   | 60   | -80   | -510 | O0 |
| ATOM 5091 H SER B 122     | -50.772 | 2.194  | 35.198 | 1.00 | 34.18 |      | H0 |
| ANISOU 5091 H SER B 122   | 4780    | 4570   | 3630   | -130 | -80   | -360 | H0 |
| ATOM 5092 HA SER B 122    | -50.577 | 2.268  | 37.939 | 1.00 | 35.50 |      | H0 |
| ANISOU 5092 HA SER B 122  | 5190    | 4690   | 3600   | -50  | -100  | -430 | H0 |
| ATOM 5093 HB2 SER B 122   | -50.048 | 4.238  | 36.852 | 1.00 | 35.84 |      | H0 |
| ANISOU 5093 HB2 SER B 122 | 5330    | 4590   | 3690   | -140 | -200  | -470 | H0 |
| ATOM 5094 HB3 SER B 122   | -51.425 | 4.227  | 36.050 | 1.00 | 35.34 |      | H0 |
| ANISOU 5094 HB3 SER B 122 | 5200    | 4550   | 3680   | -30  | -80   | -430 | H0 |
| ATOM 5095 N CYS B 123     | -52.837 | 1.378  | 38.504 | 1.00 | 35.60 |      | N0 |
| ANISOU 5095 N CYS B 123   | 5160    | 4780   | 3580   | 130  | 130   | -390 | N0 |
| ATOM 5096 CA CYS B 123    | -54.197 | 0.921  | 38.901 | 1.00 | 36.28 |      | C0 |
| ANISOU 5096 CA CYS B 123  | 5210    | 4930   | 3650   | 230  | 270   | -360 | C0 |
| ATOM 5097 C CYS B 123     | -54.240 | 0.611  | 40.405 | 1.00 | 36.68 |      | C0 |
| ANISOU 5097 C CYS B 123   | 5390    | 4980   | 3570   | 290  | 320   | -370 | C0 |
| ATOM 5098 O CYS B 123     | -53.195 | 0.722  | 41.078 | 1.00 | 35.55 |      | O0 |
| ANISOU 5098 O CYS B 123   | 5360    | 4790   | 3350   | 260  | 220   | -400 | O0 |
| ATOM 5099 CB CYS B 123    | -54.624 | -0.287 | 38.071 | 1.00 | 35.60 |      | C0 |
| ANISOU 5099 CB CYS B 123  | 4940    | 4930   | 3660   | 180  | 330   | -300 | C0 |
| ATOM 5100 SG CYS B 123    | -53.529 | -1.718 | 38.264 | 1.00 | 36.80 |      | S0 |

|                           |         |        |        |      |       |      |    |
|---------------------------|---------|--------|--------|------|-------|------|----|
| ANISOU 5100 SG CYS B 123  | 5060    | 5100   | 3820   | 80   | 280   | -270 | S0 |
| ATOM 5101 H CYS B 123     | -52.191 | 1.096  | 39.082 | 1.00 | 35.76 |      | H0 |
| ANISOU 5101 H CYS B 123   | 5230    | 4800   | 3560   | 110  | 80    | -400 | H0 |
| ATOM 5102 HA CYS B 123    | -54.827 | 1.657  | 38.719 | 1.00 | 36.57 |      | H0 |
| ANISOU 5102 HA CYS B 123  | 5260    | 4950   | 3690   | 300  | 310   | -380 | H0 |
| ATOM 5103 HB2 CYS B 123   | -55.528 | -0.552 | 38.328 | 1.00 | 36.40 |      | H0 |
| ANISOU 5103 HB2 CYS B 123 | 5000    | 5070   | 3760   | 230  | 420   | -280 | H0 |
| ATOM 5104 HB3 CYS B 123   | -54.642 | -0.035 | 37.125 | 1.00 | 35.50 |      | H0 |
| ANISOU 5104 HB3 CYS B 123 | 4850    | 4920   | 3720   | 150  | 300   | -300 | H0 |
| ATOM 5105 N ASP B 124     | -55.418 | 0.235  | 40.909 | 1.00 | 37.22 |      | N0 |
| ANISOU 5105 N ASP B 124   | 5430    | 5100   | 3610   | 380  | 470   | -340 | N0 |
| ATOM 5106 CA ASP B 124    | -55.664 | -0.015 | 42.353 | 1.00 | 37.76 |      | C0 |
| ANISOU 5106 CA ASP B 124  | 5630    | 5180   | 3540   | 460  | 540   | -340 | C0 |
| ATOM 5107 C ASP B 124     | -55.115 | -1.390 | 42.747 | 1.00 | 36.67 |      | C0 |
| ANISOU 5107 C ASP B 124   | 5470    | 5070   | 3390   | 390  | 540   | -290 | C0 |
| ATOM 5108 O ASP B 124     | -55.758 | -2.401 | 42.432 | 1.00 | 36.75 |      | O0 |
| ANISOU 5108 O ASP B 124   | 5360    | 5140   | 3470   | 360  | 640   | -220 | O0 |
| ATOM 5109 CB ASP B 124    | -57.152 | 0.088  | 42.684 | 1.00 | 39.05 |      | C0 |
| ANISOU 5109 CB ASP B 124  | 5750    | 5400   | 3680   | 580  | 720   | -310 | C0 |
| ATOM 5110 CG ASP B 124    | -57.416 | 0.201  | 44.172 | 1.00 | 40.99 |      | C0 |
| ANISOU 5110 CG ASP B 124  | 6180    | 5640   | 3760   | 690  | 810   | -320 | C0 |
| ATOM 5111 OD1 ASP B 124   | -56.431 | 0.208  | 44.949 | 1.00 | 40.85 |      | O0 |
| ANISOU 5111 OD1 ASP B 124 | 6330    | 5560   | 3630   | 670  | 720   | -360 | O0 |
| ATOM 5112 OD2 ASP B 124   | -58.600 | 0.283  | 44.538 | 1.00 | 42.77 |      | O0 |
| ANISOU 5112 OD2 ASP B 124 | 6370    | 5930   | 3950   | 800  | 980   | -300 | O0 |
| ATOM 5113 H ASP B 124     | -56.156 | 0.115  | 40.389 | 1.00 | 36.97 |      | H0 |
| ANISOU 5113 H ASP B 124   | 5290    | 5120   | 3640   | 390  | 530   | -320 | H0 |
| ATOM 5114 HA ASP B 124    | -55.184 | 0.675  | 42.868 | 1.00 | 38.32 |      | H0 |
| ANISOU 5114 HA ASP B 124  | 5840    | 5190   | 3530   | 490  | 480   | -390 | H0 |
| ATOM 5115 HB2 ASP B 124   | -57.528 | 0.873  | 42.240 | 1.00 | 39.22 |      | H0 |
| ANISOU 5115 HB2 ASP B 124 | 5760    | 5410   | 3730   | 630  | 720   | -340 | H0 |
| ATOM 5116 HB3 ASP B 124   | -57.616 | -0.704 | 42.346 | 1.00 | 38.78 |      | H0 |
| ANISOU 5116 HB3 ASP B 124 | 5590    | 5430   | 3710   | 530  | 790   | -260 | H0 |
| ATOM 5117 N VAL B 125     | -53.993 | -1.415 | 43.466 | 1.00 | 36.58 |      | N0 |
| ANISOU 5117 N VAL B 125   | 5590    | 5020   | 3280   | 380  | 430   | -310 | N0 |
| ATOM 5118 CA VAL B 125    | -53.333 | -2.658 | 43.962 | 1.00 | 36.23 |      | C0 |
| ANISOU 5118 CA VAL B 125  | 5570    | 5000   | 3200   | 340  | 410   | -260 | C0 |
| ATOM 5119 C VAL B 125     | -53.672 | -2.867 | 45.450 | 1.00 | 37.82 |      | C0 |
| ANISOU 5119 C VAL B 125   | 5940    | 5200   | 3230   | 440  | 500   | -240 | C0 |
| ATOM 5120 O VAL B 125     | -53.282 | -3.920 | 45.997 | 1.00 | 37.94 |      | O0 |
| ANISOU 5120 O VAL B 125   | 5990    | 5230   | 3190   | 440  | 510   | -180 | O0 |
| ATOM 5121 CB VAL B 125    | -51.816 | -2.583 | 43.703 | 1.00 | 36.00 |      | C0 |
| ANISOU 5121 CB VAL B 125  | 5540    | 4950   | 3190   | 270  | 230   | -280 | C0 |
| ATOM 5122 CG1 VAL B 125   | -51.092 | -3.858 | 44.101 | 1.00 | 36.11 |      | C0 |
| ANISOU 5122 CG1 VAL B 125 | 5560    | 5000   | 3160   | 270  | 200   | -220 | C0 |
| ATOM 5123 CG2 VAL B 125   | -51.522 | -2.243 | 42.246 | 1.00 | 35.00 |      | C0 |
| ANISOU 5123 CG2 VAL B 125 | 5260    | 4820   | 3210   | 190  | 160   | -290 | C0 |
| ATOM 5124 H VAL B 125     | -53.547 | -0.655 | 43.701 | 1.00 | 36.94 |      | H0 |
| ANISOU 5124 H VAL B 125   | 5730    | 5020   | 3280   | 390  | 350   | -360 | H0 |
| ATOM 5125 HA VAL B 125    | -53.689 | -3.412 | 43.461 | 1.00 | 35.86 |      | H0 |
| ANISOU 5125 HA VAL B 125  | 5410    | 4980   | 3230   | 310  | 480   | -210 | H0 |
| ATOM 5126 HB VAL B 125    | -51.458 | -1.849 | 44.260 | 1.00 | 36.70 |      | H0 |
| ANISOU 5126 HB VAL B 125  | 5740    | 5020   | 3190   | 300  | 160   | -330 | H0 |
| ATOM 5127 HG11 VAL B 125  | -51.094 | -3.948 | 45.069 | 1.00 | 37.03 |      | H0 |

|                            |         |        |        |      |       |      |    |
|----------------------------|---------|--------|--------|------|-------|------|----|
| ANISOU 5127 HG11 VAL B 125 | 5790    | 5110   | 3170   | 330  | 210   | -220 | H0 |
| ATOM 5128 HG12 VAL B 125   | -50.175 | -3.814 | 43.786 | 1.00 | 35.86 |      | H0 |
| ANISOU 5128 HG12 VAL B 125 | 5490    | 4970   | 3160   | 230  | 90    | -230 | H0 |
| ATOM 5129 HG13 VAL B 125   | -51.537 | -4.625 | 43.701 | 1.00 | 35.69 |      | H0 |
| ANISOU 5129 HG13 VAL B 125 | 5430    | 4950   | 3180   | 250  | 280   | -170 | H0 |
| ATOM 5130 HG21 VAL B 125   | -52.110 | -2.759 | 41.668 | 1.00 | 34.41 |      | H0 |
| ANISOU 5130 HG21 VAL B 125 | 5090    | 4770   | 3210   | 170  | 240   | -260 | H0 |
| ATOM 5131 HG22 VAL B 125   | -50.596 | -2.458 | 42.040 | 1.00 | 34.67 |      | H0 |
| ANISOU 5131 HG22 VAL B 125 | 5190    | 4790   | 3190   | 140  | 70    | -290 | H0 |
| ATOM 5132 HG23 VAL B 125   | -51.673 | -1.294 | 42.097 | 1.00 | 35.08 |      | H0 |
| ANISOU 5132 HG23 VAL B 125 | 5300    | 4800   | 3220   | 190  | 140   | -340 | H0 |
| ATOM 5133 N SER B 126      | -54.386 | -1.932 | 46.095 | 1.00 | 38.68 |      | N0 |
| ANISOU 5133 N SER B 126    | 6160    | 5300   | 3240   | 540  | 570   | -290 | N0 |
| ATOM 5134 CA SER B 126     | -54.799 | -2.068 | 47.519 | 1.00 | 40.28 |      | C0 |
| ANISOU 5134 CA SER B 126   | 6540    | 5510   | 3260   | 650  | 670   | -270 | C0 |
| ATOM 5135 C SER B 126      | -55.595 | -3.370 | 47.686 | 1.00 | 40.17 |      | C0 |
| ANISOU 5135 C SER B 126    | 6440    | 5550   | 3270   | 650  | 850   | -160 | C0 |
| ATOM 5136 O SER B 126      | -56.415 | -3.675 | 46.802 | 1.00 | 38.81 |      | O0 |
| ANISOU 5136 O SER B 126    | 6080    | 5420   | 3250   | 590  | 940   | -130 | O0 |
| ATOM 5137 CB SER B 126     | -55.566 | -0.863 | 48.025 | 1.00 | 41.66 |      | C0 |
| ANISOU 5137 CB SER B 126   | 6830    | 5660   | 3340   | 780  | 740   | -340 | C0 |
| ATOM 5138 OG SER B 126     | -56.847 | -0.769 | 47.420 | 1.00 | 41.81 |      | O0 |
| ANISOU 5138 OG SER B 126   | 6700    | 5730   | 3460   | 810  | 910   | -300 | O0 |
| ATOM 5139 H SER B 126      | -54.667 | -1.152 | 45.719 | 1.00 | 38.66 |      | H0 |
| ANISOU 5139 H SER B 126    | 6140    | 5270   | 3270   | 560  | 560   | -330 | H0 |
| ATOM 5140 HA SER B 126     | -53.970 | -2.149 | 48.060 | 1.00 | 40.61 |      | H0 |
| ANISOU 5140 HA SER B 126   | 6680    | 5530   | 3210   | 650  | 570   | -290 | H0 |
| ATOM 5141 HB2 SER B 126    | -55.670 | -0.931 | 49.001 | 1.00 | 42.84 |      | H0 |
| ANISOU 5141 HB2 SER B 126  | 7120    | 5810   | 3350   | 850  | 790   | -340 | H0 |
| ATOM 5142 HB3 SER B 126    | -55.053 | -0.046 | 47.830 | 1.00 | 41.60 |      | H0 |
| ANISOU 5142 HB3 SER B 126  | 6880    | 5590   | 3330   | 760  | 630   | -410 | H0 |
| ATOM 5143 N GLY B 127      | -55.306 | -4.130 | 48.751 | 1.00 | 41.36 |      | N0 |
| ANISOU 5143 N GLY B 127    | 6730    | 5700   | 3280   | 690  | 880   | -110 | N0 |
| ATOM 5144 CA GLY B 127     | -55.973 | -5.405 | 49.083 | 1.00 | 41.81 |      | C0 |
| ANISOU 5144 CA GLY B 127   | 6760    | 5790   | 3340   | 670  | 1060  | 0    | C0 |
| ATOM 5145 C GLY B 127      | -55.330 | -6.622 | 48.426 | 1.00 | 40.99 |      | C0 |
| ANISOU 5145 C GLY B 127    | 6570    | 5660   | 3340   | 560  | 1000  | 60   | C0 |
| ATOM 5146 O GLY B 127      | -55.859 | -7.728 | 48.640 | 1.00 | 41.04 |      | O0 |
| ANISOU 5146 O GLY B 127    | 6570    | 5670   | 3350   | 530  | 1140  | 160  | O0 |
| ATOM 5147 H GLY B 127      | -54.661 | -3.892 | 49.349 | 1.00 | 41.79 |      | H0 |
| ANISOU 5147 H GLY B 127    | 6910    | 5730   | 3230   | 720  | 790   | -150 | H0 |
| ATOM 5148 HA2 GLY B 127    | -55.958 | -5.523 | 50.065 | 1.00 | 43.06 |      | H0 |
| ANISOU 5148 HA2 GLY B 127  | 7070    | 5950   | 3350   | 740  | 1100  | 20   | H0 |
| ATOM 5149 HA3 GLY B 127    | -56.921 | -5.351 | 48.803 | 1.00 | 42.03 |      | H0 |
| ANISOU 5149 HA3 GLY B 127  | 6690    | 5860   | 3430   | 670  | 1180  | 20   | H0 |
| ATOM 5150 N VAL B 128      | -54.222 | -6.462 | 47.685 | 1.00 | 40.21 |      | N0 |
| ANISOU 5150 N VAL B 128    | 6420    | 5540   | 3320   | 510  | 810   | 20   | N0 |
| ATOM 5151 CA VAL B 128     | -53.562 | -7.576 | 46.932 | 1.00 | 40.03 |      | C0 |
| ANISOU 5151 CA VAL B 128   | 6310    | 5500   | 3400   | 430  | 750   | 70   | C0 |
| ATOM 5152 C VAL B 128      | -53.171 | -8.715 | 47.890 | 1.00 | 41.39 |      | C0 |
| ANISOU 5152 C VAL B 128    | 6640    | 5640   | 3450   | 480  | 790   | 160  | C0 |
| ATOM 5153 O VAL B 128      | -53.264 | -9.879 | 47.458 | 1.00 | 40.34 |      | O0 |
| ANISOU 5153 O VAL B 128    | 6470    | 5470   | 3390   | 420  | 850   | 230  | O0 |
| ATOM 5154 CB VAL B 128     | -52.350 | -7.107 | 46.100 | 1.00 | 39.38 |      | C0 |

|                            |         |         |        |      |       |     |    |
|----------------------------|---------|---------|--------|------|-------|-----|----|
| ANISOU 5154 CB VAL B 128   | 6150    | 5410    | 3390   | 390  | 550   | 10  | C0 |
| ATOM 5155 CG1 VAL B 128    | -51.199 | -6.599  | 46.957 | 1.00 | 40.36 |     | C0 |
| ANISOU 5155 CG1 VAL B 128  | 6410    | 5550    | 3380   | 450  | 380   | -40 | C0 |
| ATOM 5156 CG2 VAL B 128    | -51.865 | -8.208  | 45.166 | 1.00 | 38.72 |     | C0 |
| ANISOU 5156 CG2 VAL B 128  | 5970    | 5310    | 3430   | 320  | 530   | 60  | C0 |
| ATOM 5157 H VAL B 128      | -53.804 | -5.660  | 47.590 | 1.00 | 40.03 |     | H0 |
| ANISOU 5157 H VAL B 128    | 6410    | 5520    | 3280   | 520  | 700   | -50 | H0 |
| ATOM 5158 HA VAL B 128     | -54.221 | -7.933  | 46.312 | 1.00 | 39.64 |     | H0 |
| ANISOU 5158 HA VAL B 128   | 6160    | 5450    | 3450   | 370  | 840   | 90  | H0 |
| ATOM 5159 HB VAL B 128     | -52.657 | -6.355  | 45.537 | 1.00 | 38.79 |     | H0 |
| ANISOU 5159 HB VAL B 128   | 6000    | 5350    | 3390   | 360  | 540   | -40 | H0 |
| ATOM 5160 HG11 VAL B 128   | -51.542 | -5.999  | 47.642 | 1.00 | 41.04 |     | H0 |
| ANISOU 5160 HG11 VAL B 128 | 6590    | 5630    | 3370   | 500  | 410   | -70 | H0 |
| ATOM 5161 HG12 VAL B 128   | -50.564 | -6.120  | 46.397 | 1.00 | 39.65 |     | H0 |
| ANISOU 5161 HG12 VAL B 128 | 6250    | 5470    | 3350   | 410  | 260   | -80 | H0 |
| ATOM 5162 HG13 VAL B 128   | -50.751 | -7.351  | 47.381 | 1.00 | 40.78 |     | H0 |
| ANISOU 5162 HG13 VAL B 128 | 6520    | 5600    | 3370   | 490  | 370   | 10  | H0 |
| ATOM 5163 HG21 VAL B 128   | -51.297 | -8.826  | 45.658 | 1.00 | 39.20 |     | H0 |
| ANISOU 5163 HG21 VAL B 128 | 6110    | 5360    | 3420   | 360  | 500   | 100 | H0 |
| ATOM 5164 HG22 VAL B 128   | -51.359 | -7.815  | 44.435 | 1.00 | 37.86 |     | H0 |
| ANISOU 5164 HG22 VAL B 128 | 5770    | 5220    | 3400   | 290  | 430   | 20  | H0 |
| ATOM 5165 HG23 VAL B 128   | -52.630 | -8.689  | 44.806 | 1.00 | 38.54 |     | H0 |
| ANISOU 5165 HG23 VAL B 128 | 5890    | 5280    | 3470   | 280  | 640   | 90  | H0 |
| ATOM 5166 N ASP B 129      | -52.773 | -8.404  | 49.134 | 1.00 | 43.55 |     | N0 |
| ANISOU 5166 N ASP B 129    | 7090    | 5920    | 3530   | 590  | 750   | 150 | N0 |
| ATOM 5167 CA ASP B 129     | -52.360 | -9.400  | 50.168 | 1.00 | 45.32 |     | C0 |
| ANISOU 5167 CA ASP B 129   | 7500    | 6130    | 3600   | 670  | 770   | 240 | C0 |
| ATOM 5168 C ASP B 129      | -53.525 | -9.739  | 51.111 | 1.00 | 46.48 |     | C0 |
| ANISOU 5168 C ASP B 129    | 7760    | 6270    | 3630   | 710  | 1000  | 310 | C0 |
| ATOM 5169 O ASP B 129      | -53.254 | -10.095 | 52.276 | 1.00 | 48.70 |     | O0 |
| ANISOU 5169 O ASP B 129    | 8240    | 6540    | 3720   | 810  | 1010  | 360 | O0 |
| ATOM 5170 CB ASP B 129     | -51.175 | -8.890  | 50.994 | 1.00 | 46.96 |     | C0 |
| ANISOU 5170 CB ASP B 129   | 7840    | 6370    | 3640   | 760  | 570   | 190 | C0 |
| ATOM 5171 CG ASP B 129     | -49.891 | -8.719  | 50.202 | 1.00 | 47.16 |     | C0 |
| ANISOU 5171 CG ASP B 129   | 7740    | 6420    | 3760   | 720  | 350   | 140 | C0 |
| ATOM 5172 OD1 ASP B 129    | -49.883 | -9.067  | 49.000 | 1.00 | 46.30 |     | O0 |
| ANISOU 5172 OD1 ASP B 129  | 7460    | 6290    | 3840   | 630  | 360   | 150 | O0 |
| ATOM 5173 OD2 ASP B 129    | -48.908 | -8.234  | 50.795 | 1.00 | 49.78 |     | O0 |
| ANISOU 5173 OD2 ASP B 129  | 8150    | 6790    | 3970   | 770  | 170   | 100 | O0 |
| ATOM 5174 H ASP B 129      | -52.723 | -7.543  | 49.427 | 1.00 | 43.64 |     | H0 |
| ANISOU 5174 H ASP B 129    | 7150    | 5950    | 3480   | 620  | 700   | 90  | H0 |
| ATOM 5175 HA ASP B 129     | -52.082 | -10.227 | 49.708 | 1.00 | 44.95 |     | H0 |
| ANISOU 5175 HA ASP B 129   | 7410    | 6050    | 3620   | 630  | 770   | 290 | H0 |
| ATOM 5176 HB2 ASP B 129    | -51.411 | -8.025  | 51.388 | 1.00 | 47.43 |     | H0 |
| ANISOU 5176 HB2 ASP B 129  | 7950    | 6440    | 3630   | 790  | 560   | 130 | H0 |
| ATOM 5177 HB3 ASP B 129    | -50.995 | -9.518  | 51.723 | 1.00 | 48.10 |     | H0 |
| ANISOU 5177 HB3 ASP B 129  | 8110    | 6500    | 3660   | 830  | 590   | 250 | H0 |
| ATOM 5178 N THR B 130      | -54.772 | -9.643  | 50.643 | 1.00 | 45.50 |     | N0 |
| ANISOU 5178 N THR B 130    | 7510    | 6160    | 3620   | 640  | 1170  | 320 | N0 |
| ATOM 5179 CA THR B 130     | -55.990 | -10.004 | 51.417 | 1.00 | 46.51 |     | C0 |
| ANISOU 5179 CA THR B 130   | 7700    | 6300    | 3670   | 660  | 1420  | 400 | C0 |
| ATOM 5180 C THR B 130      | -56.734 | -11.119 | 50.674 | 1.00 | 46.82 |     | C0 |
| ANISOU 5180 C THR B 130    | 7610    | 6320    | 3870   | 510  | 1570  | 490 | C0 |
| ATOM 5181 O THR B 130      | -56.448 | -11.324 | 49.465 | 1.00 | 44.87 |     | O0 |

|                            |         |         |        |      |       |      |    |
|----------------------------|---------|---------|--------|------|-------|------|----|
| ANISOU 5181 O THR B 130    | 7200    | 6050    | 3800   | 410  | 1470  | 460  | O0 |
| ATOM 5182 CB THR B 130     | -56.870 | -8.769  | 51.653 | 1.00 | 46.44 |      | C0 |
| ANISOU 5182 CB THR B 130   | 7660    | 6360    | 3620   | 720  | 1500  | 330  | C0 |
| ATOM 5183 OG1 THR B 130    | -57.491 | -8.399  | 50.420 | 1.00 | 44.94 |      | O0 |
| ANISOU 5183 OG1 THR B 130  | 7220    | 6210    | 3640   | 620  | 1510  | 290  | O0 |
| ATOM 5184 CG2 THR B 130    | -56.090 | -7.595  | 52.204 | 1.00 | 46.18 |      | C0 |
| ANISOU 5184 CG2 THR B 130  | 7770    | 6330    | 3450   | 830  | 1330  | 220  | C0 |
| ATOM 5185 H THR B 130      | -54.970 | -9.349  | 49.805 | 1.00 | 44.52 |      | H0 |
| ANISOU 5185 H THR B 130    | 7250    | 6050    | 3620   | 570  | 1150  | 280  | H0 |
| ATOM 5186 HA THR B 130     | -55.704 | -10.353 | 52.292 | 1.00 | 47.73 |      | H0 |
| ANISOU 5186 HA THR B 130   | 8020    | 6440    | 3670   | 730  | 1430  | 450  | H0 |
| ATOM 5187 HB THR B 130     | -57.573 | -9.013  | 52.301 | 1.00 | 47.72 |      | H0 |
| ANISOU 5187 HB THR B 130   | 7880    | 6550    | 3710   | 750  | 1660  | 390  | H0 |
| ATOM 5188 HG21 THR B 130   | -55.587 | -7.878  | 52.989 | 1.00 | 47.18 |      | H0 |
| ANISOU 5188 HG21 THR B 130 | 8050    | 6440    | 3430   | 890  | 1290  | 250  | H0 |
| ATOM 5189 HG22 THR B 130   | -56.706 | -6.883  | 52.453 | 1.00 | 46.91 |      | H0 |
| ANISOU 5189 HG22 THR B 130 | 7870    | 6450    | 3500   | 890  | 1400  | 190  | H0 |
| ATOM 5190 HG23 THR B 130   | -55.473 | -7.266  | 51.526 | 1.00 | 45.11 |      | H0 |
| ANISOU 5190 HG23 THR B 130 | 7560    | 6180    | 3400   | 790  | 1180  | 170  | H0 |
| ATOM 5191 N GLU B 131      | -57.660 | -11.795 | 51.360 | 1.00 | 48.54 |      | N0 |
| ANISOU 5191 N GLU B 131    | 7880    | 6530    | 4030   | 490  | 1790  | 590  | N0 |
| ATOM 5192 CA GLU B 131     | -58.491 | -12.891 | 50.787 | 1.00 | 49.66 |      | C0 |
| ANISOU 5192 CA GLU B 131   | 7910    | 6640    | 4310   | 330  | 1950  | 680  | C0 |
| ATOM 5193 C GLU B 131      | -59.268 | -12.393 | 49.560 | 1.00 | 48.36 |      | C0 |
| ANISOU 5193 C GLU B 131    | 7470    | 6550    | 4350   | 210  | 1950  | 620  | C0 |
| ATOM 5194 O GLU B 131      | -59.347 | -13.156 | 48.571 | 1.00 | 47.68 |      | O0 |
| ANISOU 5194 O GLU B 131    | 7270    | 6420    | 4430   | 60   | 1940  | 630  | O0 |
| ATOM 5195 CB GLU B 131     | -59.449 | -13.446 | 51.837 | 1.00 | 52.38 |      | C0 |
| ANISOU 5195 CB GLU B 131   | 8360    | 7000    | 4540   | 320  | 2210  | 800  | C0 |
| ATOM 5196 CG GLU B 131     | -58.817 | -14.529 | 52.677 | 1.00 | 54.38 |      | C0 |
| ANISOU 5196 CG GLU B 131   | 8870    | 7140    | 4650   | 370  | 2240  | 910  | C0 |
| ATOM 5197 CD GLU B 131     | -59.600 | -14.889 | 53.924 | 1.00 | 57.27 |      | C0 |
| ANISOU 5197 CD GLU B 131   | 9390    | 7520    | 4850   | 410  | 2480  | 1030 | C0 |
| ATOM 5198 OE1 GLU B 131    | -60.257 | -15.943 | 53.908 | 1.00 | 59.56 |      | O0 |
| ANISOU 5198 OE1 GLU B 131  | 9680    | 7750    | 5190   | 260  | 2660  | 1150 | O0 |
| ATOM 5199 OE2 GLU B 131    | -59.537 | -14.117 | 54.907 | 1.00 | 58.28 |      | O0 |
| ANISOU 5199 OE2 GLU B 131  | 9650    | 7710    | 4780   | 570  | 2490  | 1010 | O0 |
| ATOM 5200 H GLU B 131      | -57.835 | -11.623 | 52.237 | 1.00 | 49.87 |      | H0 |
| ANISOU 5200 H GLU B 131    | 8170    | 6720    | 4060   | 580  | 1860  | 620  | H0 |
| ATOM 5201 HA GLU B 131     | -57.887 | -13.614 | 50.500 | 1.00 | 49.20 |      | H0 |
| ANISOU 5201 HA GLU B 131   | 7900    | 6510    | 4280   | 290  | 1880  | 710  | H0 |
| ATOM 5202 HB2 GLU B 131    | -59.742 | -12.715 | 52.420 | 1.00 | 53.05 |      | H0 |
| ANISOU 5202 HB2 GLU B 131  | 8470    | 7150    | 4530   | 420  | 2250  | 780  | H0 |
| ATOM 5203 HB3 GLU B 131    | -60.238 | -13.811 | 51.385 | 1.00 | 52.78 |      | H0 |
| ANISOU 5203 HB3 GLU B 131  | 8270    | 7070    | 4710   | 200  | 2320  | 840  | H0 |
| ATOM 5204 HG2 GLU B 131    | -58.713 | -15.337 | 52.130 | 1.00 | 54.05 |      | H0 |
| ANISOU 5204 HG2 GLU B 131  | 8810    | 7020    | 4700   | 260  | 2230  | 950  | H0 |
| ATOM 5205 HG3 GLU B 131    | -57.924 | -14.236 | 52.946 | 1.00 | 53.82 |      | H0 |
| ANISOU 5205 HG3 GLU B 131  | 8910    | 7060    | 4490   | 480  | 2090  | 870  | H0 |
| ATOM 5206 N SER B 132      | -59.807 | -11.171 | 49.623 | 1.00 | 48.17 |      | N0 |
| ANISOU 5206 N SER B 132    | 7350    | 6630    | 4320   | 290  | 1970  | 550  | N0 |
| ATOM 5207 CA SER B 132     | -60.642 | -10.545 | 48.561 | 1.00 | 47.76 |      | C0 |
| ANISOU 5207 CA SER B 132   | 7040    | 6670    | 4440   | 220  | 1970  | 490  | C0 |
| ATOM 5208 C SER B 132      | -59.768 | -10.117 | 47.369 | 1.00 | 44.92 |      | C0 |

|             |     |           |         |         |        |      |       |      |    |
|-------------|-----|-----------|---------|---------|--------|------|-------|------|----|
| ANISOU 5208 | C   | SER B 132 | 6590    | 6280    | 4200   | 190  | 1740  | 390  | C0 |
| ATOM 5209   | O   | SER B 132 | -60.288 | -10.065 | 46.236 | 1.00 | 43.91 |      | O0 |
| ANISOU 5209 | O   | SER B 132 | 6260    | 6190    | 4230   | 90   | 1720  | 370  | O0 |
| ATOM 5210   | CB  | SER B 132 | -61.431 | -9.384  | 49.125 | 1.00 | 49.20 |      | C0 |
| ANISOU 5210 | CB  | SER B 132 | 7190    | 6960    | 4540   | 350  | 2070  | 460  | C0 |
| ATOM 5211   | OG  | SER B 132 | -60.575 | -8.289  | 49.430 | 1.00 | 49.10 |      | O0 |
| ANISOU 5211 | OG  | SER B 132 | 7310    | 6920    | 4420   | 500  | 1910  | 360  | O0 |
| ATOM 5212   | H   | SER B 132 | -59.700 | -10.622 | 50.342 | 1.00 | 48.82 |      | H0 |
| ANISOU 5212 | H   | SER B 132 | 7540    | 6740    | 4280   | 400  | 1970  | 530  | H0 |
| ATOM 5213   | HA  | SER B 132 | -61.286 | -11.230 | 48.238 | 1.00 | 48.20 |      | H0 |
| ANISOU 5213 | HA  | SER B 132 | 6990    | 6740    | 4580   | 100  | 2070  | 550  | H0 |
| ATOM 5214   | HB2 | SER B 132 | -62.107 | -9.100  | 48.469 | 1.00 | 49.08 |      | H0 |
| ANISOU 5214 | HB2 | SER B 132 | 6990    | 7020    | 4640   | 310  | 2100  | 440  | H0 |
| ATOM 5215   | HB3 | SER B 132 | -61.898 | -9.673  | 49.941 | 1.00 | 50.72 |      | H0 |
| ANISOU 5215 | HB3 | SER B 132 | 7450    | 7180    | 4640   | 380  | 2220  | 520  | H0 |
| ATOM 5216   | N   | GLY B 133 | -58.492 | -9.814  | 47.625 | 1.00 | 43.65 |      | N0 |
| ANISOU 5216 | N   | GLY B 133 | 6580    | 6050    | 3950   | 280  | 1570  | 350  | N0 |
| ATOM 5217   | CA  | GLY B 133 | -57.495 | -9.427  | 46.612 | 1.00 | 41.21 |      | C0 |
| ANISOU 5217 | CA  | GLY B 133 | 6210    | 5710    | 3730   | 250  | 1360  | 270  | C0 |
| ATOM 5218   | C   | GLY B 133 | -57.656 | -7.983  | 46.170 | 1.00 | 40.26 |      | C0 |
| ANISOU 5218 | C   | GLY B 133 | 6010    | 5640    | 3640   | 310  | 1280  | 170  | C0 |
| ATOM 5219   | O   | GLY B 133 | -58.549 | -7.297  | 46.698 | 1.00 | 40.65 |      | O0 |
| ANISOU 5219 | O   | GLY B 133 | 6050    | 5760    | 3640   | 390  | 1400  | 160  | O0 |
| ATOM 5220   | H   | GLY B 133 | -58.158 | -9.819  | 48.472 | 1.00 | 44.32 |      | H0 |
| ANISOU 5220 | H   | GLY B 133 | 6820    | 6120    | 3900   | 350  | 1580  | 360  | H0 |
| ATOM 5221   | HA2 | GLY B 133 | -56.588 | -9.558  | 46.985 | 1.00 | 41.18 |      | H0 |
| ANISOU 5221 | HA2 | GLY B 133 | 6330    | 5660    | 3650   | 300  | 1260  | 260  | H0 |
| ATOM 5222   | HA3 | GLY B 133 | -57.591 | -10.021 | 45.826 | 1.00 | 40.76 |      | H0 |
| ANISOU 5222 | HA3 | GLY B 133 | 6060    | 5640    | 3790   | 150  | 1350  | 280  | H0 |
| ATOM 5223   | N   | ALA B 134 | -56.813 | -7.538  | 45.234 | 1.00 | 38.50 |      | N0 |
| ANISOU 5223 | N   | ALA B 134 | 5730    | 5400    | 3500   | 280  | 1100  | 100  | N0 |
| ATOM 5224   | CA  | ALA B 134 | -56.917 | -6.220  | 44.563 | 1.00 | 38.21 |      | C0 |
| ANISOU 5224 | CA  | ALA B 134 | 5600    | 5390    | 3520   | 310  | 1020  | 20   | C0 |
| ATOM 5225   | C   | ALA B 134 | -57.799 | -6.364  | 43.321 | 1.00 | 37.94 |      | C0 |
| ANISOU 5225 | C   | ALA B 134 | 5350    | 5410    | 3660   | 220  | 1070  | 20   | C0 |
| ATOM 5226   | O   | ALA B 134 | -57.860 | -7.483  | 42.774 | 1.00 | 37.77 |      | O0 |
| ANISOU 5226 | O   | ALA B 134 | 5260    | 5370    | 3720   | 110  | 1090  | 70   | O0 |
| ATOM 5227   | CB  | ALA B 134 | -55.549 | -5.703  | 44.197 | 1.00 | 36.76 |      | C0 |
| ANISOU 5227 | CB  | ALA B 134 | 5470    | 5160    | 3340   | 300  | 820   | -50  | C0 |
| ATOM 5228   | H   | ALA B 134 | -56.106 | -8.026  | 44.929 | 1.00 | 38.09 |      | H0 |
| ANISOU 5228 | H   | ALA B 134 | 5680    | 5310    | 3480   | 240  | 1030  | 110  | H0 |
| ATOM 5229   | HA  | ALA B 134 | -57.345 | -5.583  | 45.181 | 1.00 | 38.90 |      | H0 |
| ANISOU 5229 | HA  | ALA B 134 | 5750    | 5500    | 3530   | 390  | 1080  | 0    | H0 |
| ATOM 5230   | HB1 | ALA B 134 | -55.626 | -4.805  | 43.833 | 1.00 | 36.59 |      | H0 |
| ANISOU 5230 | HB1 | ALA B 134 | 5420    | 5140    | 3340   | 320  | 780   | -100 | H0 |
| ATOM 5231   | HB2 | ALA B 134 | -54.986 | -5.683  | 44.989 | 1.00 | 37.40 |      | H0 |
| ANISOU 5231 | HB2 | ALA B 134 | 5680    | 5220    | 3310   | 350  | 780   | -50  | H0 |
| ATOM 5232   | HB3 | ALA B 134 | -55.148 | -6.287  | 43.531 | 1.00 | 36.14 |      | H0 |
| ANISOU 5232 | HB3 | ALA B 134 | 5330    | 5070    | 3340   | 240  | 770   | -30  | H0 |
| ATOM 5233   | N   | THR B 135 | -58.453 | -5.276  | 42.905 | 1.00 | 38.54 |      | N0 |
| ANISOU 5233 | N   | THR B 135 | 5340    | 5530    | 3770   | 270  | 1080  | -20  | N0 |
| ATOM 5234   | CA  | THR B 135 | -59.101 | -5.146  | 41.573 | 1.00 | 38.96 |      | C0 |
| ANISOU 5234 | CA  | THR B 135 | 5190    | 5640    | 3970   | 210  | 1060  | -30  | C0 |
| ATOM 5235   | C   | THR B 135 | -58.402 | -4.027  | 40.795 | 1.00 | 38.23 |      | C0 |

|                            |         |        |        |      |       |      |    |
|----------------------------|---------|--------|--------|------|-------|------|----|
| ANISOU 5235 C THR B 135    | 5110    | 5510   | 3910   | 240  | 910   | -100 | C0 |
| ATOM 5236 O THR B 135      | -58.677 | -2.843 | 41.059 | 1.00 | 39.06 |      | O0 |
| ANISOU 5236 O THR B 135    | 5260    | 5620   | 3960   | 350  | 910   | -140 | O0 |
| ATOM 5237 CB THR B 135     | -60.612 | -4.922 | 41.683 | 1.00 | 40.18 |      | C0 |
| ANISOU 5237 CB THR B 135   | 5210    | 5910   | 4150   | 250  | 1220  | 0    | C0 |
| ATOM 5238 OG1 THR B 135    | -61.149 | -5.983 | 42.470 | 1.00 | 42.18 |      | O0 |
| ANISOU 5238 OG1 THR B 135  | 5460    | 6190   | 4370   | 200  | 1370  | 70   | O0 |
| ATOM 5239 CG2 THR B 135    | -61.288 | -4.902 | 40.330 | 1.00 | 39.77 |      | C0 |
| ANISOU 5239 CG2 THR B 135  | 4930    | 5940   | 4240   | 180  | 1190  | -10  | C0 |
| ATOM 5240 H THR B 135      | -58.550 | -4.528 | 43.415 | 1.00 | 39.15 |      | H0 |
| ANISOU 5240 H THR B 135    | 5490    | 5610   | 3770   | 360  | 1090  | -50  | H0 |
| ATOM 5241 HA THR B 135     | -58.958 | -5.989 | 41.090 | 1.00 | 38.38 |      | H0 |
| ANISOU 5241 HA THR B 135   | 5060    | 5560   | 3960   | 110  | 1050  | -10  | H0 |
| ATOM 5242 HB THR B 135     | -60.774 | -4.062 | 42.140 | 1.00 | 40.86 |      | H0 |
| ANISOU 5242 HB THR B 135   | 5350    | 6010   | 4170   | 360  | 1240  | -30  | H0 |
| ATOM 5243 HG21 THR B 135   | -61.096 | -4.060 | 39.881 | 1.00 | 39.29 |      | H0 |
| ANISOU 5243 HG21 THR B 135 | 4870    | 5870   | 4190   | 240  | 1110  | -50  | H0 |
| ATOM 5244 HG22 THR B 135   | -62.251 | -4.995 | 40.445 | 1.00 | 40.81 |      | H0 |
| ANISOU 5244 HG22 THR B 135 | 4950    | 6160   | 4390   | 180  | 1290  | 30   | H0 |
| ATOM 5245 HG23 THR B 135   | -60.955 | -5.641 | 39.789 | 1.00 | 39.14 |      | H0 |
| ANISOU 5245 HG23 THR B 135 | 4820    | 5830   | 4220   | 70   | 1140  | 0    | H0 |
| ATOM 5246 N CYS B 136      | -57.506 | -4.413 | 39.892 | 1.00 | 37.61 |      | N0 |
| ANISOU 5246 N CYS B 136    | 5000    | 5390   | 3900   | 150  | 790   | -110 | N0 |
| ATOM 5247 CA CYS B 136     | -56.784 | -3.523 | 38.954 | 1.00 | 37.50 |      | C0 |
| ANISOU 5247 CA CYS B 136   | 4970    | 5340   | 3930   | 140  | 650   | -160 | C0 |
| ATOM 5248 C CYS B 136      | -57.608 | -3.383 | 37.665 | 1.00 | 37.95 |      | C0 |
| ANISOU 5248 C CYS B 136    | 4860    | 5460   | 4100   | 110  | 660   | -160 | C0 |
| ATOM 5249 O CYS B 136      | -57.878 | -4.420 | 37.021 | 1.00 | 38.21 |      | O0 |
| ANISOU 5249 O CYS B 136    | 4780    | 5530   | 4210   | 10   | 680   | -130 | O0 |
| ATOM 5250 CB CYS B 136     | -55.398 | -4.094 | 38.677 | 1.00 | 37.04 |      | C0 |
| ANISOU 5250 CB CYS B 136   | 4960    | 5230   | 3890   | 70   | 540   | -170 | C0 |
| ATOM 5251 SG CYS B 136     | -54.519 | -3.254 | 37.337 | 1.00 | 36.80 |      | S0 |
| ANISOU 5251 SG CYS B 136   | 4880    | 5170   | 3930   | 30   | 390   | -210 | S0 |
| ATOM 5252 H CYS B 136      | -57.268 | -5.286 | 39.783 | 1.00 | 37.45 |      | H0 |
| ANISOU 5252 H CYS B 136    | 4970    | 5360   | 3900   | 80   | 790   | -90  | H0 |
| ATOM 5253 HA CYS B 136     | -56.686 | -2.638 | 39.374 | 1.00 | 37.90 |      | H0 |
| ANISOU 5253 HA CYS B 136   | 5110    | 5370   | 3930   | 210  | 630   | -200 | H0 |
| ATOM 5254 HB2 CYS B 136    | -54.858 | -4.030 | 39.491 | 1.00 | 37.45 |      | H0 |
| ANISOU 5254 HB2 CYS B 136  | 5120    | 5250   | 3860   | 100  | 510   | -170 | H0 |
| ATOM 5255 HB3 CYS B 136    | -55.482 | -5.041 | 38.446 | 1.00 | 36.99 |      | H0 |
| ANISOU 5255 HB3 CYS B 136  | 4910    | 5230   | 3920   | 10   | 570   | -130 | H0 |
| ATOM 5256 N ARG B 137      | -57.995 | -2.154 | 37.306 | 1.00 | 38.38 |      | N0 |
| ANISOU 5256 N ARG B 137    | 4900    | 5520   | 4160   | 190  | 630   | -190 | N0 |
| ATOM 5257 CA ARG B 137     | -58.852 | -1.859 | 36.126 | 1.00 | 38.84 |      | C0 |
| ANISOU 5257 CA ARG B 137   | 4800    | 5660   | 4300   | 190  | 630   | -190 | C0 |
| ATOM 5258 C ARG B 137      | -57.983 | -1.288 | 34.997 | 1.00 | 37.41 |      | C0 |
| ANISOU 5258 C ARG B 137    | 4630    | 5420   | 4160   | 160  | 500   | -210 | C0 |
| ATOM 5259 O ARG B 137      | -57.299 | -0.279 | 35.231 | 1.00 | 36.68 |      | O0 |
| ANISOU 5259 O ARG B 137    | 4670    | 5240   | 4020   | 210  | 440   | -240 | O0 |
| ATOM 5260 CB ARG B 137     | -59.995 | -0.921 | 36.523 | 1.00 | 40.72 |      | C0 |
| ANISOU 5260 CB ARG B 137   | 5010    | 5950   | 4510   | 340  | 710   | -190 | C0 |
| ATOM 5261 CG ARG B 137     | -60.919 | -1.512 | 37.577 | 1.00 | 43.36 |      | C0 |
| ANISOU 5261 CG ARG B 137   | 5300    | 6370   | 4800   | 370  | 870   | -150 | C0 |
| ATOM 5262 CD ARG B 137     | -62.205 | -0.741 | 37.787 | 1.00 | 45.71 |      | C0 |



|                            |         |        |        |      |       |      |    |
|----------------------------|---------|--------|--------|------|-------|------|----|
| ANISOU 5262 CD ARG B 137   | 5520    | 6770   | 5080   | 530  | 970   | -140 | C0 |
| ATOM 5263 NE ARG B 137     | -62.741 | -0.973 | 39.126 | 1.00 | 49.23 |      | N0 |
| ANISOU 5263 NE ARG B 137   | 6010    | 7250   | 5450   | 600  | 1130  | -110 | N0 |
| ATOM 5264 CZ ARG B 137     | -63.529 | -1.990 | 39.494 | 1.00 | 50.65 |      | C0 |
| ANISOU 5264 CZ ARG B 137   | 6050    | 7540   | 5650   | 530  | 1250  | -50  | C0 |
| ATOM 5265 NH1 ARG B 137    | -63.910 | -2.914 | 38.623 | 1.00 | 50.20 |      | N0 |
| ANISOU 5265 NH1 ARG B 137  | 5810    | 7560   | 5710   | 370  | 1240  | -20  | N0 |
| ATOM 5266 NH2 ARG B 137    | -63.933 | -2.077 | 40.751 | 1.00 | 51.79 |      | N0 |
| ANISOU 5266 NH2 ARG B 137  | 6270    | 7710   | 5700   | 600  | 1400  | -30  | N0 |
| ATOM 5267 H ARG B 137      | -57.752 | -1.410 | 37.772 | 1.00 | 38.70 |      | H0 |
| ANISOU 5267 H ARG B 137    | 5040    | 5520   | 4140   | 260  | 610   | -220 | H0 |
| ATOM 5268 HA ARG B 137     | -59.244 | -2.706 | 35.817 | 1.00 | 38.78 |      | H0 |
| ANISOU 5268 HA ARG B 137   | 4690    | 5700   | 4340   | 120  | 660   | -160 | H0 |
| ATOM 5269 HB2 ARG B 137    | -59.613 | -0.086 | 36.866 | 1.00 | 41.02 |      | H0 |
| ANISOU 5269 HB2 ARG B 137  | 5170    | 5920   | 4490   | 410  | 690   | -220 | H0 |
| ATOM 5270 HB3 ARG B 137    | -60.520 | -0.708 | 35.723 | 1.00 | 41.00 |      | H0 |
| ANISOU 5270 HB3 ARG B 137  | 4940    | 6040   | 4590   | 350  | 700   | -180 | H0 |
| ATOM 5271 HG2 ARG B 137    | -61.146 | -2.432 | 37.320 | 1.00 | 43.11 |      | H0 |
| ANISOU 5271 HG2 ARG B 137  | 5170    | 6380   | 4820   | 270  | 890   | -120 | H0 |
| ATOM 5272 HG3 ARG B 137    | -60.438 | -1.555 | 38.431 | 1.00 | 43.31 |      | H0 |
| ANISOU 5272 HG3 ARG B 137  | 5430    | 6300   | 4720   | 390  | 880   | -160 | H0 |
| ATOM 5273 HD2 ARG B 137    | -62.032 | 0.218  | 37.668 | 1.00 | 46.05 |      | H0 |
| ANISOU 5273 HD2 ARG B 137  | 5640    | 6760   | 5100   | 620  | 930   | -170 | H0 |
| ATOM 5274 HD3 ARG B 137    | -62.865 | -1.016 | 37.117 | 1.00 | 46.26 |      | H0 |
| ANISOU 5274 HD3 ARG B 137  | 5420    | 6930   | 5230   | 490  | 980   | -110 | H0 |
| ATOM 5275 HE ARG B 137     | -62.522 | -0.399 | 39.745 | 1.00 | 49.21 |      | H0 |
| ANISOU 5275 HE ARG B 137   | 6140    | 7190   | 5360   | 690  | 1140  | -140 | H0 |
| ATOM 5276 HH11 ARG B 137   | -63.646 | -2.871 | 37.787 | 1.00 | 49.42 |      | H0 |
| ANISOU 5276 HH11 ARG B 137 | 5670    | 7440   | 5660   | 320  | 1140  | -40  | H0 |
| ATOM 5277 HH12 ARG B 137   | -64.428 | -3.574 | 38.885 | 1.00 | 50.94 |      | H0 |
| ANISOU 5277 HH12 ARG B 137 | 5820    | 7710   | 5820   | 310  | 1320  | 20   | H0 |
| ATOM 5278 HH21 ARG B 137   | -63.687 | -1.466 | 41.336 | 1.00 | 52.06 |      | H0 |
| ANISOU 5278 HH21 ARG B 137 | 6440    | 7690   | 5650   | 710  | 1410  | -50  | H0 |
| ATOM 5279 HH22 ARG B 137   | -64.455 | -2.742 | 41.000 | 1.00 | 52.49 |      | H0 |
| ANISOU 5279 HH22 ARG B 137 | 6270    | 7860   | 5810   | 550  | 1490  | 20   | H0 |
| ATOM 5280 N ILE B 138      | -58.015 | -1.933 | 33.826 | 1.00 | 36.07 |      | N0 |
| ANISOU 5280 N ILE B 138    | 4350    | 5290   | 4070   | 70   | 460   | -200 | N0 |
| ATOM 5281 CA ILE B 138     | -57.247 | -1.548 | 32.603 | 1.00 | 35.83 |      | C0 |
| ANISOU 5281 CA ILE B 138   | 4320    | 5220   | 4080   | 30   | 350   | -210 | C0 |
| ATOM 5282 C ILE B 138      | -58.249 | -1.081 | 31.540 | 1.00 | 36.02 |      | C0 |
| ANISOU 5282 C ILE B 138    | 4220    | 5320   | 4140   | 70   | 340   | -210 | C0 |
| ATOM 5283 O ILE B 138      | -59.177 | -1.849 | 31.237 | 1.00 | 36.72 |      | O0 |
| ANISOU 5283 O ILE B 138    | 4170    | 5510   | 4270   | 30   | 380   | -190 | O0 |
| ATOM 5284 CB ILE B 138     | -56.388 | -2.734 | 32.119 | 1.00 | 35.36 |      | C0 |
| ANISOU 5284 CB ILE B 138   | 4240    | 5140   | 4050   | -90  | 320   | -210 | C0 |
| ATOM 5285 CG1 ILE B 138    | -55.251 | -3.031 | 33.100 | 1.00 | 35.63 |      | C0 |
| ANISOU 5285 CG1 ILE B 138  | 4390    | 5110   | 4040   | -100 | 300   | -210 | C0 |
| ATOM 5286 CG2 ILE B 138    | -55.870 | -2.498 | 30.710 | 1.00 | 35.23 |      | C0 |
| ANISOU 5286 CG2 ILE B 138  | 4190    | 5120   | 4070   | -130 | 240   | -210 | C0 |
| ATOM 5287 CD1 ILE B 138    | -54.628 | -4.394 | 32.930 | 1.00 | 35.53 |      | C0 |
| ANISOU 5287 CD1 ILE B 138  | 4370    | 5090   | 4040   | -180 | 300   | -190 | C0 |
| ATOM 5288 H ILE B 138      | -58.528 | -2.674 | 33.698 | 1.00 | 36.59 |      | H0 |
| ANISOU 5288 H ILE B 138    | 4330    | 5410   | 4170   | 20   | 500   | -180 | H0 |
| ATOM 5289 HA ILE B 138     | -56.656 | -0.807 | 32.824 | 1.00 | 35.65 |      | H0 |

|                            |         |        |        |      |       |      |    |
|----------------------------|---------|--------|--------|------|-------|------|----|
| ANISOU 5289 HA ILE B 138   | 4390    | 5140   | 4020   | 60   | 310   | -230 | H0 |
| ATOM 5290 HB ILE B 138     | -56.972 | -3.531 | 32.093 | 1.00 | 35.73 |      | H0 |
| ANISOU 5290 HB ILE B 138   | 4220    | 5230   | 4120   | -130 | 360   | -200 | H0 |
| ATOM 5291 HG12 ILE B 138   | -54.553 | -2.351 | 32.987 | 1.00 | 35.35 |      | H0 |
| ANISOU 5291 HG12 ILE B 138 | 4410    | 5030   | 3990   | -90  | 240   | -220 | H0 |
| ATOM 5292 HG13 ILE B 138   | -55.596 | -2.957 | 34.015 | 1.00 | 36.08 |      | H0 |
| ANISOU 5292 HG13 ILE B 138 | 4490    | 5170   | 4050   | -60  | 350   | -210 | H0 |
| ATOM 5293 HG21 ILE B 138   | -56.577 | -2.681 | 30.067 | 1.00 | 35.30 |      | H0 |
| ANISOU 5293 HG21 ILE B 138 | 4120    | 5190   | 4110   | -140 | 240   | -210 | H0 |
| ATOM 5294 HG22 ILE B 138   | -55.117 | -3.088 | 30.534 | 1.00 | 34.63 |      | H0 |
| ANISOU 5294 HG22 ILE B 138 | 4130    | 5020   | 4000   | -180 | 210   | -210 | H0 |
| ATOM 5295 HG23 ILE B 138   | -55.582 | -1.573 | 30.618 | 1.00 | 35.08 |      | H0 |
| ANISOU 5295 HG23 ILE B 138 | 4220    | 5070   | 4040   | -90  | 200   | -220 | H0 |
| ATOM 5296 HD11 ILE B 138   | -55.327 | -5.071 | 32.907 | 1.00 | 35.74 |      | H0 |
| ANISOU 5296 HD11 ILE B 138 | 4350    | 5140   | 4090   | -210 | 360   | -180 | H0 |
| ATOM 5297 HD12 ILE B 138   | -54.029 | -4.573 | 33.675 | 1.00 | 35.49 |      | H0 |
| ANISOU 5297 HD12 ILE B 138 | 4430    | 5050   | 4000   | -170 | 300   | -190 | H0 |
| ATOM 5298 HD13 ILE B 138   | -54.125 | -4.422 | 32.098 | 1.00 | 34.99 |      | H0 |
| ANISOU 5298 HD13 ILE B 138 | 4280    | 5010   | 4000   | -210 | 250   | -200 | H0 |
| ATOM 5299 N LYS B 139      | -58.091 | 0.139  | 31.026 | 1.00 | 35.73 |      | N0 |
| ANISOU 5299 N LYS B 139    | 4240    | 5240   | 4090   | 150  | 290   | -210 | N0 |
| ATOM 5300 CA LYS B 139     | -58.979 | 0.705  | 29.979 | 1.00 | 36.80 |      | C0 |
| ANISOU 5300 CA LYS B 139   | 4280    | 5450   | 4250   | 220  | 270   | -200 | C0 |
| ATOM 5301 C LYS B 139      | -58.215 | 0.756  | 28.649 | 1.00 | 35.89 |      | C0 |
| ANISOU 5301 C LYS B 139    | 4180    | 5310   | 4150   | 150  | 180   | -190 | C0 |
| ATOM 5302 O LYS B 139      | -57.146 | 1.398  | 28.590 | 1.00 | 34.01 |      | O0 |
| ANISOU 5302 O LYS B 139    | 4070    | 4960   | 3890   | 130  | 130   | -200 | O0 |
| ATOM 5303 CB LYS B 139     | -59.506 | 2.075  | 30.405 | 1.00 | 38.75 |      | C0 |
| ANISOU 5303 CB LYS B 139   | 4610    | 5670   | 4450   | 390  | 290   | -190 | C0 |
| ATOM 5304 CG LYS B 139     | -60.632 | 2.032  | 31.432 | 1.00 | 41.15 |      | C0 |
| ANISOU 5304 CG LYS B 139   | 4850    | 6050   | 4730   | 490  | 400   | -190 | C0 |
| ATOM 5305 CD LYS B 139     | -61.367 | 3.352  | 31.570 | 1.00 | 43.54 |      | C0 |
| ANISOU 5305 CD LYS B 139   | 5210    | 6350   | 4990   | 690  | 430   | -180 | C0 |
| ATOM 5306 CE LYS B 139     | -62.626 | 3.253  | 32.404 | 1.00 | 45.66 |      | C0 |
| ANISOU 5306 CE LYS B 139   | 5370    | 6740   | 5240   | 810  | 550   | -170 | C0 |
| ATOM 5307 NZ LYS B 139     | -63.105 | 4.593  | 32.817 | 1.00 | 47.61 |      | N0 |
| ANISOU 5307 NZ LYS B 139   | 5730    | 6940   | 5420   | 1040 | 600   | -170 | N0 |
| ATOM 5308 H LYS B 139      | -57.423 | 0.701  | 31.287 | 1.00 | 35.77 |      | H0 |
| ANISOU 5308 H LYS B 139    | 4350    | 5170   | 4070   | 160  | 260   | -220 | H0 |
| ATOM 5309 HA LYS B 139     | -59.747 | 0.100  | 29.872 | 1.00 | 37.23 |      | H0 |
| ANISOU 5309 HA LYS B 139   | 4210    | 5600   | 4330   | 200  | 300   | -190 | H0 |
| ATOM 5310 HB2 LYS B 139    | -58.762 | 2.593  | 30.778 | 1.00 | 38.60 |      | H0 |
| ANISOU 5310 HB2 LYS B 139  | 4730    | 5540   | 4400   | 390  | 270   | -210 | H0 |
| ATOM 5311 HB3 LYS B 139    | -59.828 | 2.546  | 29.608 | 1.00 | 39.13 |      | H0 |
| ANISOU 5311 HB3 LYS B 139  | 4620    | 5740   | 4500   | 440  | 260   | -180 | H0 |
| ATOM 5312 HG2 LYS B 139    | -61.272 | 1.336  | 31.172 | 1.00 | 41.32 |      | H0 |
| ANISOU 5312 HG2 LYS B 139  | 4730    | 6180   | 4790   | 450  | 420   | -170 | H0 |
| ATOM 5313 HG3 LYS B 139    | -60.255 | 1.784  | 32.304 | 1.00 | 40.93 |      | H0 |
| ANISOU 5313 HG3 LYS B 139  | 4900    | 5980   | 4670   | 460  | 440   | -200 | H0 |
| ATOM 5314 HD2 LYS B 139    | -60.767 | 4.010  | 31.981 | 1.00 | 43.40 |      | H0 |
| ANISOU 5314 HD2 LYS B 139  | 5350    | 6210   | 4930   | 720  | 420   | -200 | H0 |
| ATOM 5315 HD3 LYS B 139    | -61.605 | 3.679  | 30.677 | 1.00 | 43.61 |      | H0 |
| ANISOU 5315 HD3 LYS B 139  | 5170    | 6390   | 5010   | 730  | 380   | -170 | H0 |
| ATOM 5316 HE2 LYS B 139    | -63.326 | 2.809  | 31.888 | 1.00 | 45.99 |      | H0 |

|                            |         |        |        |      |       |      |    |
|----------------------------|---------|--------|--------|------|-------|------|----|
| ANISOU 5316 HE2 LYS B 139  | 5230    | 6910   | 5330   | 800  | 560   | -140 | H0 |
| ATOM 5317 HE3 LYS B 139    | -62.450 | 2.717  | 33.201 | 1.00 | 45.46 |      | H0 |
| ANISOU 5317 HE3 LYS B 139  | 5360    | 6710   | 5200   | 760  | 600   | -180 | H0 |
| ATOM 5318 HZ1 LYS B 139    | -62.476 | 4.999  | 33.330 | 1.00 | 47.23 |      | H0 |
| ANISOU 5318 HZ1 LYS B 139  | 5850    | 6770   | 5320   | 1050 | 590   | -200 | H0 |
| ATOM 5319 HZ2 LYS B 139    | -63.871 | 4.511  | 33.296 | 1.00 | 48.39 |      | H0 |
| ANISOU 5319 HZ2 LYS B 139  | 5750    | 7130   | 5510   | 1120 | 680   | -160 | H0 |
| ATOM 5320 HZ3 LYS B 139    | -63.265 | 5.102  | 32.084 | 1.00 | 47.68 |      | H0 |
| ANISOU 5320 HZ3 LYS B 139  | 5730    | 6950   | 5440   | 1100 | 550   | -160 | H0 |
| ATOM 5321 N ILE B 140      | -58.759 | 0.089  | 27.629 | 1.00 | 36.11 |      | N0 |
| ANISOU 5321 N ILE B 140    | 4080    | 5430   | 4210   | 100  | 150   | -190 | N0 |
| ATOM 5322 CA ILE B 140     | -58.175 | -0.014 | 26.261 | 1.00 | 35.42 |      | C0 |
| ANISOU 5322 CA ILE B 140   | 3990    | 5340   | 4130   | 50   | 70    | -180 | C0 |
| ATOM 5323 C ILE B 140      | -59.192 | 0.541  | 25.261 | 1.00 | 35.31 |      | C0 |
| ANISOU 5323 C ILE B 140    | 3890    | 5420   | 4110   | 130  | 30    | -160 | C0 |
| ATOM 5324 O ILE B 140      | -60.319 | 0.016  | 25.195 | 1.00 | 35.62 |      | O0 |
| ANISOU 5324 O ILE B 140    | 3780    | 5580   | 4170   | 130  | 30    | -170 | O0 |
| ATOM 5325 CB ILE B 140     | -57.766 | -1.465 | 25.943 | 1.00 | 36.10 |      | C0 |
| ANISOU 5325 CB ILE B 140   | 4040    | 5440   | 4240   | -90  | 70    | -200 | C0 |
| ATOM 5326 CG1 ILE B 140    | -56.682 | -1.943 | 26.914 | 1.00 | 36.53 |      | C0 |
| ANISOU 5326 CG1 ILE B 140  | 4180    | 5400   | 4300   | -150 | 100   | -210 | C0 |
| ATOM 5327 CG2 ILE B 140    | -57.324 | -1.597 | 24.487 | 1.00 | 36.07 |      | C0 |
| ANISOU 5327 CG2 ILE B 140  | 4040    | 5440   | 4230   | -130 | 0     | -200 | C0 |
| ATOM 5328 CD1 ILE B 140    | -56.279 | -3.387 | 26.744 | 1.00 | 36.52 |      | C0 |
| ANISOU 5328 CD1 ILE B 140  | 4160    | 5400   | 4310   | -250 | 110   | -220 | C0 |
| ATOM 5329 H ILE B 140      | -59.548 | -0.359 | 27.709 | 1.00 | 36.52 |      | H0 |
| ANISOU 5329 H ILE B 140    | 4030    | 5560   | 4280   | 100  | 170   | -180 | H0 |
| ATOM 5330 HA ILE B 140     | -57.377 | 0.538  | 26.228 | 1.00 | 35.12 |      | H0 |
| ANISOU 5330 HA ILE B 140   | 4050    | 5220   | 4070   | 50   | 50    | -180 | H0 |
| ATOM 5331 HB ILE B 140     | -58.562 | -2.037 | 26.073 | 1.00 | 36.58 |      | H0 |
| ANISOU 5331 HB ILE B 140   | 4010    | 5570   | 4320   | -120 | 90    | -210 | H0 |
| ATOM 5332 HG12 ILE B 140   | -55.886 | -1.381 | 26.796 | 1.00 | 36.00 |      | H0 |
| ANISOU 5332 HG12 ILE B 140 | 4190    | 5280   | 4210   | -140 | 80    | -200 | H0 |
| ATOM 5333 HG13 ILE B 140   | -57.004 | -1.816 | 27.832 | 1.00 | 36.59 |      | H0 |
| ANISOU 5333 HG13 ILE B 140 | 4200    | 5410   | 4300   | -110 | 140   | -210 | H0 |
| ATOM 5334 HG21 ILE B 140   | -58.069 | -1.392 | 23.897 | 1.00 | 36.61 |      | H0 |
| ANISOU 5334 HG21 ILE B 140 | 4040    | 5580   | 4290   | -100 | -30   | -200 | H0 |
| ATOM 5335 HG22 ILE B 140   | -57.024 | -2.507 | 24.317 | 1.00 | 35.74 |      | H0 |
| ANISOU 5335 HG22 ILE B 140 | 3990    | 5400   | 4190   | -210 | 0     | -220 | H0 |
| ATOM 5336 HG23 ILE B 140   | -56.593 | -0.979 | 24.311 | 1.00 | 35.71 |      | H0 |
| ANISOU 5336 HG23 ILE B 140 | 4070    | 5340   | 4160   | -110 | -10   | -190 | H0 |
| ATOM 5337 HD11 ILE B 140   | -57.075 | -3.943 | 26.686 | 1.00 | 36.86 |      | H0 |
| ANISOU 5337 HD11 ILE B 140 | 4140    | 5500   | 4370   | -280 | 130   | -230 | H0 |
| ATOM 5338 HD12 ILE B 140   | -55.745 | -3.668 | 27.508 | 1.00 | 36.15 |      | H0 |
| ANISOU 5338 HD12 ILE B 140 | 4170    | 5310   | 4260   | -260 | 140   | -220 | H0 |
| ATOM 5339 HD13 ILE B 140   | -55.754 | -3.487 | 25.931 | 1.00 | 36.13 |      | H0 |
| ANISOU 5339 HD13 ILE B 140 | 4130    | 5340   | 4260   | -280 | 80    | -230 | H0 |
| ATOM 5340 N GLY B 141      | -58.798 | 1.574  | 24.521 | 1.00 | 34.52 |      | N0 |
| ANISOU 5340 N GLY B 141    | 3890    | 5260   | 3970   | 200  | -20   | -140 | N0 |
| ATOM 5341 CA GLY B 141     | -59.596 | 2.128  | 23.414 | 1.00 | 35.89 |      | C0 |
| ANISOU 5341 CA GLY B 141   | 4010    | 5510   | 4120   | 300  | -70   | -110 | C0 |
| ATOM 5342 C GLY B 141      | -58.714 | 2.749  | 22.350 | 1.00 | 35.03 |      | C0 |
| ANISOU 5342 C GLY B 141    | 4020    | 5320   | 3970   | 290  | -120  | -80  | C0 |
| ATOM 5343 O GLY B 141      | -57.487 | 2.797  | 22.548 | 1.00 | 33.55 |      | O0 |

|                           |         |        |        |      |       |      |    |
|---------------------------|---------|--------|--------|------|-------|------|----|
| ANISOU 5343 O GLY B 141   | 3950    | 5020   | 3780   | 210  | -100  | -80  | O0 |
| ATOM 5344 H GLY B 141     | -58.007 | 2.003  | 24.665 | 1.00 | 34.44 |      | H0 |
| ANISOU 5344 H GLY B 141   | 3980    | 5150   | 3950   | 190  | -20   | -130 | H0 |
| ATOM 5345 HA2 GLY B 141   | -60.136 | 1.403  | 23.010 | 1.00 | 35.89 |      | H0 |
| ANISOU 5345 HA2 GLY B 141 | 3890    | 5610   | 4130   | 250  | -100  | -120 | H0 |
| ATOM 5346 HA3 GLY B 141   | -60.215 | 2.812  | 23.772 | 1.00 | 36.41 |      | H0 |
| ANISOU 5346 HA3 GLY B 141 | 4070    | 5590   | 4170   | 410  | -60   | -90  | H0 |
| ATOM 5347 N SER B 142     | -59.332 | 3.215  | 21.264 | 1.00 | 35.60 |      | N0 |
| ANISOU 5347 N SER B 142   | 4070    | 5460   | 4000   | 380  | -180  | -50  | N0 |
| ATOM 5348 CA SER B 142    | -58.661 | 3.939  | 20.156 | 1.00 | 35.47 |      | C0 |
| ANISOU 5348 CA SER B 142  | 4190    | 5370   | 3920   | 400  | -220  | 0    | C0 |
| ATOM 5349 C SER B 142     | -58.089 | 5.251  | 20.687 | 1.00 | 35.54 |      | C0 |
| ANISOU 5349 C SER B 142   | 4370    | 5210   | 3920   | 470  | -180  | 30   | C0 |
| ATOM 5350 O SER B 142     | -58.748 | 5.897  | 21.515 | 1.00 | 36.53 |      | O0 |
| ANISOU 5350 O SER B 142   | 4520    | 5320   | 4050   | 590  | -150  | 30   | O0 |
| ATOM 5351 CB SER B 142    | -59.598 | 4.188  | 19.012 | 1.00 | 36.15 |      | C0 |
| ANISOU 5351 CB SER B 142  | 4210    | 5570   | 3950   | 510  | -290  | 30   | C0 |
| ATOM 5352 OG SER B 142    | -58.970 | 4.992  | 18.030 | 1.00 | 36.33 |      | O0 |
| ANISOU 5352 OG SER B 142  | 4390    | 5510   | 3910   | 550  | -310  | 90   | O0 |
| ATOM 5353 H SER B 142     | -60.227 | 3.120  | 21.123 | 1.00 | 36.34 |      | H0 |
| ANISOU 5353 H SER B 142   | 4060    | 5650   | 4090   | 440  | -200  | -50  | H0 |
| ATOM 5354 HA SER B 142    | -57.908 | 3.376  | 19.832 | 1.00 | 34.69 |      | H0 |
| ANISOU 5354 HA SER B 142  | 4100    | 5250   | 3830   | 300  | -220  | -10  | H0 |
| ATOM 5355 HB2 SER B 142   | -59.867 | 3.330  | 18.614 | 1.00 | 36.19 |      | H0 |
| ANISOU 5355 HB2 SER B 142 | 4120    | 5670   | 3960   | 450  | -330  | 0    | H0 |
| ATOM 5356 HB3 SER B 142   | -60.406 | 4.642  | 19.342 | 1.00 | 37.05 |      | H0 |
| ANISOU 5356 HB3 SER B 142 | 4280    | 5730   | 4070   | 630  | -290  | 40   | H0 |
| ATOM 5357 N TRP B 143     | -56.910 | 5.645  | 20.210 | 1.00 | 35.43 |      | N0 |
| ANISOU 5357 N TRP B 143   | 4490    | 5080   | 3880   | 390  | -170  | 60   | N0 |
| ATOM 5358 CA TRP B 143    | -56.304 | 6.946  | 20.576 | 1.00 | 35.26 |      | C0 |
| ANISOU 5358 CA TRP B 143  | 4670    | 4890   | 3850   | 420  | -140  | 100  | C0 |
| ATOM 5359 C TRP B 143     | -56.958 | 8.067  | 19.763 | 1.00 | 35.96 |      | C0 |
| ANISOU 5359 C TRP B 143   | 4860    | 4940   | 3870   | 580  | -170  | 160  | C0 |
| ATOM 5360 O TRP B 143     | -57.106 | 9.165  | 20.323 | 1.00 | 36.73 |      | O0 |
| ANISOU 5360 O TRP B 143   | 5100    | 4910   | 3950   | 680  | -140  | 180  | O0 |
| ATOM 5361 CB TRP B 143    | -54.776 | 6.921  | 20.428 | 1.00 | 35.65 |      | C0 |
| ANISOU 5361 CB TRP B 143  | 4800    | 4840   | 3910   | 250  | -120  | 110  | C0 |
| ATOM 5362 CG TRP B 143    | -54.128 | 8.081  | 21.116 | 1.00 | 36.22 |      | C0 |
| ANISOU 5362 CG TRP B 143  | 5040    | 4730   | 3980   | 230  | -100  | 120  | C0 |
| ATOM 5363 CD1 TRP B 143   | -53.444 | 9.109  | 20.541 | 1.00 | 37.45 |      | C0 |
| ANISOU 5363 CD1 TRP B 143 | 5370    | 4750   | 4110   | 190  | -90   | 180  | C0 |
| ATOM 5364 CD2 TRP B 143   | -54.190 | 8.374  | 22.520 | 1.00 | 37.41 |      | C0 |
| ANISOU 5364 CD2 TRP B 143 | 5250    | 4810   | 4160   | 230  | -80   | 70   | C0 |
| ATOM 5365 NE1 TRP B 143   | -53.043 | 10.005 | 21.493 | 1.00 | 38.39 |      | N0 |
| ANISOU 5365 NE1 TRP B 143 | 5640    | 4710   | 4240   | 160  | -80   | 170  | N0 |
| ATOM 5366 CE2 TRP B 143   | -53.491 | 9.585  | 22.719 | 1.00 | 38.44 |      | C0 |
| ANISOU 5366 CE2 TRP B 143 | 5580    | 4750   | 4270   | 190  | -80   | 90   | C0 |
| ATOM 5367 CE3 TRP B 143   | -54.754 | 7.727  | 23.627 | 1.00 | 37.25 |      | C0 |
| ANISOU 5367 CE3 TRP B 143 | 5130    | 4860   | 4160   | 270  | -70   | 10   | C0 |
| ATOM 5368 CZ2 TRP B 143   | -53.344 | 10.157 | 23.982 | 1.00 | 38.88 |      | C0 |
| ANISOU 5368 CZ2 TRP B 143 | 5760    | 4690   | 4330   | 180  | -70   | 40   | C0 |
| ATOM 5369 CZ3 TRP B 143   | -54.593 | 8.285  | 24.877 | 1.00 | 38.16 |      | C0 |
| ANISOU 5369 CZ3 TRP B 143 | 5360    | 4860   | 4270   | 270  | -50   | -30  | C0 |
| ATOM 5370 CH2 TRP B 143   | -53.903 | 9.488  | 25.047 | 1.00 | 39.22 |      | C0 |

|             |                |         |        |        |      |       |     |    |
|-------------|----------------|---------|--------|--------|------|-------|-----|----|
| ANISOU 5370 | CH2 TRP B 143  | 5710    | 4810   | 4380   | 230  | -60   | -20 | C0 |
| ATOM 5371   | H TRP B 143    | -56.405 | 5.146  | 19.639 | 1.00 | 34.79 |     | H0 |
| ANISOU 5371 | H TRP B 143    | 4400    | 5020   | 3800   | 310  | -180  | 60  | H0 |
| ATOM 5372   | HA TRP B 143   | -56.503 | 7.103  | 21.528 | 1.00 | 35.45 |     | H0 |
| ANISOU 5372 | HA TRP B 143   | 4700    | 4880   | 3890   | 440  | -120  | 70  | H0 |
| ATOM 5373   | HB2 TRP B 143  | -54.436 | 6.085  | 20.806 | 1.00 | 34.57 |     | H0 |
| ANISOU 5373 | HB2 TRP B 143  | 4580    | 4750   | 3810   | 170  | -110  | 70  | H0 |
| ATOM 5374   | HB3 TRP B 143  | -54.552 | 6.940  | 19.475 | 1.00 | 35.61 |     | H0 |
| ANISOU 5374 | HB3 TRP B 143  | 4810    | 4850   | 3870   | 240  | -130  | 150 | H0 |
| ATOM 5375   | HD1 TRP B 143  | -53.256 | 9.189  | 19.618 | 1.00 | 37.84 |     | H0 |
| ANISOU 5375 | HD1 TRP B 143  | 5430    | 4810   | 4130   | 180  | -90   | 230 | H0 |
| ATOM 5376   | HE1 TRP B 143  | -52.583 | 10.730 | 21.342 | 1.00 | 39.23 |     | H0 |
| ANISOU 5376 | HE1 TRP B 143  | 5870    | 4710   | 4330   | 120  | -70   | 200 | H0 |
| ATOM 5377   | HE3 TRP B 143  | -55.227 | 6.917  | 23.518 | 1.00 | 36.75 |     | H0 |
| ANISOU 5377 | HE3 TRP B 143  | 4940    | 4910   | 4110   | 280  | -70   | -10 | H0 |
| ATOM 5378   | HZ2 TRP B 143  | -52.865 | 10.957 | 24.102 | 1.00 | 39.79 |     | H0 |
| ANISOU 5378 | HZ2 TRP B 143  | 6020    | 4670   | 4430   | 140  | -70   | 50  | H0 |
| ATOM 5379   | HZ3 TRP B 143  | -54.976 | 7.861  | 25.629 | 1.00 | 37.69 |     | H0 |
| ANISOU 5379 | HZ3 TRP B 143  | 5250    | 4850   | 4220   | 300  | -40   | -70 | H0 |
| ATOM 5380   | HH2 TRP B 143  | -53.814 | 9.848  | 25.912 | 1.00 | 39.21 |     | H0 |
| ANISOU 5380 | HH2 TRP B 143  | 5790    | 4730   | 4370   | 240  | -60   | -60 | H0 |
| ATOM 5381   | N THR B 144    | -57.346 | 7.815  | 18.506 | 1.00 | 36.12 |     | N0 |
| ANISOU 5381 | N THR B 144    | 4820    | 5070   | 3840   | 630  | -220  | 200 | N0 |
| ATOM 5382   | CA THR B 144   | -57.689 | 8.890  | 17.531 | 1.00 | 37.40 |     | C0 |
| ANISOU 5382 | CA THR B 144   | 5120    | 5180   | 3910   | 770  | -240  | 280 | C0 |
| ATOM 5383   | C THR B 144    | -59.002 | 8.639  | 16.779 | 1.00 | 37.78 |     | C0 |
| ANISOU 5383 | C THR B 144    | 5030    | 5410   | 3910   | 930  | -320  | 300 | C0 |
| ATOM 5384   | O THR B 144    | -59.380 | 9.540  | 16.006 | 1.00 | 39.36 |     | O0 |
| ANISOU 5384 | O THR B 144    | 5340    | 5590   | 4030   | 1080 | -350  | 370 | O0 |
| ATOM 5385   | CB THR B 144   | -56.556 | 9.115  | 16.520 | 1.00 | 37.84 |     | C0 |
| ANISOU 5385 | CB THR B 144   | 5300    | 5150   | 3920   | 670  | -230  | 340 | C0 |
| ATOM 5386   | OG1 THR B 144  | -56.428 | 7.971  | 15.672 | 1.00 | 37.48 |     | O0 |
| ANISOU 5386 | OG1 THR B 144  | 5130    | 5250   | 3860   | 590  | -260  | 320 | O0 |
| ATOM 5387   | CG2 THR B 144  | -55.235 | 9.405  | 17.196 | 1.00 | 37.69 |     | C0 |
| ANISOU 5387 | CG2 THR B 144  | 5390    | 4970   | 3960   | 500  | -160  | 340 | C0 |
| ATOM 5388   | H THR B 144    | -57.391 | 6.980  | 18.147 | 1.00 | 35.65 |     | H0 |
| ANISOU 5388 | H THR B 144    | 4660    | 5100   | 3780   | 570  | -240  | 180 | H0 |
| ATOM 5389   | HA THR B 144   | -57.797 | 9.720  | 18.042 | 1.00 | 38.03 |     | H0 |
| ANISOU 5389 | HA THR B 144   | 5300    | 5150   | 3990   | 850  | -220  | 300 | H0 |
| ATOM 5390   | HB THR B 144   | -56.796 | 9.893  | 15.962 | 1.00 | 39.01 |     | H0 |
| ANISOU 5390 | HB THR B 144   | 5560    | 5250   | 4010   | 770  | -240  | 400 | H0 |
| ATOM 5391   | HG21 THR B 144 | -55.368 | 10.064 | 17.902 | 1.00 | 37.95 |     | H0 |
| ANISOU 5391 | HG21 THR B 144 | 5500    | 4910   | 4010   | 540  | -150  | 330 | H0 |
| ATOM 5392   | HG22 THR B 144 | -54.604 | 9.755  | 16.542 | 1.00 | 37.93 |     | H0 |
| ANISOU 5392 | HG22 THR B 144 | 5510    | 4940   | 3960   | 450  | -140  | 390 | H0 |
| ATOM 5393   | HG23 THR B 144 | -54.880 | 8.585  | 17.582 | 1.00 | 36.51 |     | H0 |
| ANISOU 5393 | HG23 THR B 144 | 5130    | 4880   | 3860   | 400  | -150  | 290 | H0 |
| ATOM 5394   | N HIS B 145    | -59.675 | 7.502  | 16.977 | 1.00 | 36.90 |     | N0 |
| ANISOU 5394 | N HIS B 145    | 4700    | 5480   | 3840   | 890  | -360  | 230 | N0 |
| ATOM 5395   | CA HIS B 145   | -60.952 | 7.175  | 16.283 | 1.00 | 38.44 |     | C0 |
| ANISOU 5395 | CA HIS B 145   | 4730    | 5880   | 4000   | 1010 | -450  | 240 | C0 |
| ATOM 5396   | C HIS B 145    | -62.119 | 7.184  | 17.280 | 1.00 | 39.46 |     | C0 |
| ANISOU 5396 | C HIS B 145    | 4700    | 6120   | 4180   | 1120 | -430  | 210 | C0 |
| ATOM 5397   | O HIS B 145    | -62.134 | 6.334  | 18.191 | 1.00 | 38.99 |     | O0 |

|                           |         |        |        |      |       |     |    |
|---------------------------|---------|--------|--------|------|-------|-----|----|
| ANISOU 5397 O HIS B 145   | 4520    | 6100   | 4200   | 1000 | -390  | 150 | O0 |
| ATOM 5398 CB HIS B 145    | -60.828 | 5.849  | 15.523 | 1.00 | 37.77 |     | C0 |
| ANISOU 5398 CB HIS B 145  | 4520    | 5930   | 3900   | 850  | -510  | 190 | C0 |
| ATOM 5399 CG HIS B 145    | -59.828 | 5.902  | 14.418 | 1.00 | 37.50 |     | C0 |
| ANISOU 5399 CG HIS B 145  | 4630    | 5820   | 3790   | 790  | -510  | 220 | C0 |
| ATOM 5400 ND1 HIS B 145   | -60.066 | 6.579  | 13.243 | 1.00 | 38.58 |     | N0 |
| ANISOU 5400 ND1 HIS B 145 | 4860    | 5980   | 3820   | 910  | -570  | 290 | N0 |
| ATOM 5401 CD2 HIS B 145   | -58.585 | 5.385  | 14.312 | 1.00 | 36.26 |     | C0 |
| ANISOU 5401 CD2 HIS B 145 | 4550    | 5580   | 3650   | 620  | -450  | 200 | C0 |
| ATOM 5402 CE1 HIS B 145   | -59.013 | 6.465  | 12.457 | 1.00 | 38.62 |     | C0 |
| ANISOU 5402 CE1 HIS B 145 | 5000    | 5910   | 3770   | 820  | -540  | 320 | C0 |
| ATOM 5403 NE2 HIS B 145   | -58.091 | 5.740  | 13.090 | 1.00 | 36.73 |     | N0 |
| ANISOU 5403 NE2 HIS B 145 | 4740    | 5610   | 3610   | 640  | -470  | 260 | N0 |
| ATOM 5404 H HIS B 145     | -59.412 | 6.849  | 17.552 | 1.00 | 36.14 |     | H0 |
| ANISOU 5404 H HIS B 145   | 4540    | 5400   | 3800   | 780  | -330  | 180 | H0 |
| ATOM 5405 HA HIS B 145    | -61.121 | 7.884  | 15.620 | 1.00 | 39.46 |     | H0 |
| ANISOU 5405 HA HIS B 145  | 4940    | 5990   | 4060   | 1120 | -480  | 290 | H0 |
| ATOM 5406 HB2 HIS B 145   | -60.573 | 5.141  | 16.153 | 1.00 | 36.80 |     | H0 |
| ANISOU 5406 HB2 HIS B 145 | 4330    | 5800   | 3840   | 730  | -470  | 130 | H0 |
| ATOM 5407 HB3 HIS B 145   | -61.706 | 5.614  | 15.147 | 1.00 | 38.67 |     | H0 |
| ANISOU 5407 HB3 HIS B 145 | 4510    | 6190   | 4000   | 910  | -570  | 180 | H0 |
| ATOM 5408 HD2 HIS B 145   | -58.140 | 4.870  | 14.957 | 1.00 | 35.24 |     | H0 |
| ANISOU 5408 HD2 HIS B 145 | 4390    | 5420   | 3580   | 520  | -410  | 160 | H0 |
| ATOM 5409 HE1 HIS B 145   | -58.927 | 6.835  | 11.596 | 1.00 | 39.28 |     | H0 |
| ANISOU 5409 HE1 HIS B 145 | 5170    | 5990   | 3760   | 870  | -560  | 370 | H0 |
| ATOM 5410 N HIS B 146     | -63.055 | 8.123  | 17.110 | 1.00 | 41.54 |     | N0 |
| ANISOU 5410 N HIS B 146   | 4960    | 6430   | 4390   | 1350 | -460  | 270 | N0 |
| ATOM 5411 CA HIS B 146    | -64.332 | 8.204  | 17.869 | 1.00 | 42.92 |     | C0 |
| ANISOU 5411 CA HIS B 146  | 4960    | 6750   | 4600   | 1510 | -450  | 260 | C0 |
| ATOM 5412 C HIS B 146     | -65.242 | 7.031  | 17.471 | 1.00 | 43.51 |     | C0 |
| ANISOU 5412 C HIS B 146   | 4740    | 7090   | 4700   | 1430 | -530  | 220 | C0 |
| ATOM 5413 O HIS B 146     | -64.848 | 6.242  | 16.583 | 1.00 | 42.07 |     | O0 |
| ANISOU 5413 O HIS B 146   | 4530    | 6950   | 4500   | 1280 | -610  | 190 | O0 |
| ATOM 5414 CB HIS B 146    | -64.993 | 9.581  | 17.699 | 1.00 | 45.23 |     | C0 |
| ANISOU 5414 CB HIS B 146  | 5360    | 7010   | 4820   | 1810 | -450  | 340 | C0 |
| ATOM 5415 CG HIS B 146    | -65.247 | 10.001 | 16.291 | 1.00 | 46.97 |     | C0 |
| ANISOU 5415 CG HIS B 146  | 5620    | 7290   | 4940   | 1930 | -560  | 410 | C0 |
| ATOM 5416 ND1 HIS B 146   | -66.216 | 9.413  | 15.498 | 1.00 | 48.44 |     | N0 |
| ANISOU 5416 ND1 HIS B 146 | 5570    | 7740   | 5100   | 1970 | -680  | 410 | N0 |
| ATOM 5417 CD2 HIS B 146   | -64.686 | 10.975 | 15.543 | 1.00 | 47.94 |     | C0 |
| ANISOU 5417 CD2 HIS B 146 | 6000    | 7240   | 4970   | 2010 | -570  | 490 | C0 |
| ATOM 5418 CE1 HIS B 146   | -66.224 | 9.996  | 14.315 | 1.00 | 49.82 |     | C0 |
| ANISOU 5418 CE1 HIS B 146 | 5860    | 7910   | 5160   | 2090 | -760  | 490 | C0 |
| ATOM 5419 NE2 HIS B 146   | -65.299 | 10.959 | 14.318 | 1.00 | 49.73 |     | N0 |
| ANISOU 5419 NE2 HIS B 146 | 6160    | 7630   | 5110   | 2120 | -690  | 540 | N0 |
| ATOM 5420 H HIS B 146     | -62.968 | 8.797  | 16.506 | 1.00 | 42.25 |     | H0 |
| ANISOU 5420 H HIS B 146   | 5170    | 6460   | 4420   | 1450 | -480  | 320 | H0 |
| ATOM 5421 HA HIS B 146    | -64.111 | 8.095  | 18.824 | 1.00 | 42.25 |     | H0 |
| ANISOU 5421 HA HIS B 146  | 4880    | 6600   | 4570   | 1460 | -380  | 230 | H0 |
| ATOM 5422 HB2 HIS B 146   | -65.849 | 9.580  | 18.181 | 1.00 | 46.15 |     | H0 |
| ANISOU 5422 HB2 HIS B 146 | 5330    | 7240   | 4960   | 1920 | -440  | 340 | H0 |
| ATOM 5423 HB3 HIS B 146   | -64.420 | 10.255 | 18.126 | 1.00 | 45.00 |     | H0 |
| ANISOU 5423 HB3 HIS B 146 | 5520    | 6790   | 4790   | 1830 | -390  | 350 | H0 |
| ATOM 5424 HD2 HIS B 146   | -64.001 | 11.559 | 15.808 | 1.00 | 47.62 |     | H0 |

|             |               |         |       |        |      |       |     |    |
|-------------|---------------|---------|-------|--------|------|-------|-----|----|
| ANISOU 5424 | HD2 HIS B 146 | 6160    | 7000  | 4930   | 2000 | -510  | 500 | H0 |
| ATOM 5425   | HE1 HIS B 146 | -66.785 | 9.773 | 13.594 | 1.00 | 50.85 |     | H0 |
| ANISOU 5425 | HE1 HIS B 146 | 5880    | 8200  | 5240   | 2140 | -860  | 500 | H0 |
| ATOM 5426   | N SER B 147   | -66.403 | 6.920 | 18.127 | 1.00 | 44.69 |     | N0 |
| ANISOU 5426 | N SER B 147   | 4670    | 7410  | 4900   | 1540 | -520  | 210 | N0 |
| ATOM 5427   | CA SER B 147  | -67.306 | 5.737 | 18.107 | 1.00 | 45.74 |     | C0 |
| ANISOU 5427 | CA SER B 147  | 4500    | 7800  | 5090   | 1420 | -570  | 170 | C0 |
| ATOM 5428   | C SER B 147   | -67.918 | 5.513 | 16.717 | 1.00 | 47.34 |     | C0 |
| ANISOU 5428 | C SER B 147   | 4580    | 8190  | 5220   | 1440 | -730  | 180 | C0 |
| ATOM 5429   | O SER B 147   | -68.302 | 4.361 | 16.444 | 1.00 | 47.61 |     | O0 |
| ANISOU 5429 | O SER B 147   | 4420    | 8380  | 5290   | 1260 | -800  | 130 | O0 |
| ATOM 5430   | CB SER B 147  | -68.383 | 5.862 | 19.161 | 1.00 | 46.73 |     | C0 |
| ANISOU 5430 | CB SER B 147  | 4430    | 8060  | 5270   | 1540 | -500  | 180 | C0 |
| ATOM 5431   | OG SER B 147  | -69.237 | 6.962 | 18.886 | 1.00 | 48.60 |     | O0 |
| ANISOU 5431 | OG SER B 147  | 4630    | 8380  | 5450   | 1850 | -520  | 250 | O0 |
| ATOM 5432   | H SER B 147   | -66.730 | 7.585 | 18.656 | 1.00 | 45.51 |     | H0 |
| ANISOU 5432 | H SER B 147   | 4800    | 7490  | 5000   | 1680 | -470  | 240 | H0 |
| ATOM 5433   | HA SER B 147  | -66.756 | 4.939 | 18.326 | 1.00 | 44.31 |     | H0 |
| ANISOU 5433 | HA SER B 147  | 4320    | 7560  | 4950   | 1230 | -550  | 120 | H0 |
| ATOM 5434   | HB2 SER B 147 | -68.912 | 5.033 | 19.187 | 1.00 | 47.09 |     | H0 |
| ANISOU 5434 | HB2 SER B 147 | 4270    | 8260  | 5360   | 1430 | -520  | 150 | H0 |
| ATOM 5435   | HB3 SER B 147 | -67.964 | 5.985 | 20.042 | 1.00 | 45.86 |     | H0 |
| ANISOU 5435 | HB3 SER B 147 | 4410    | 7820  | 5190   | 1530 | -400  | 160 | H0 |
| ATOM 5436   | N ARG B 148   | -68.010 | 6.550 | 15.877 | 1.00 | 49.30 |     | N0 |
| ANISOU 5436 | N ARG B 148   | 4950    | 8420  | 5370   | 1660 | -800  | 260 | N0 |
| ATOM 5437   | CA ARG B 148  | -68.501 | 6.429 | 14.473 | 1.00 | 52.19 |     | C0 |
| ANISOU 5437 | CA ARG B 148  | 5240    | 8950  | 5640   | 1700 | -970  | 280 | C0 |
| ATOM 5438   | C ARG B 148   | -67.418 | 5.832 | 13.561 | 1.00 | 49.74 |     | C0 |
| ANISOU 5438 | C ARG B 148   | 5100    | 8530  | 5270   | 1500 | -1010 | 240 | C0 |
| ATOM 5439   | O ARG B 148   | -67.761 | 5.514 | 12.411 | 1.00 | 50.75 |     | O0 |
| ANISOU 5439 | O ARG B 148   | 5170    | 8800  | 5310   | 1490 | -1160 | 240 | O0 |
| ATOM 5440   | CB ARG B 148  | -68.951 | 7.778 | 13.897 | 1.00 | 55.59 |     | C0 |
| ANISOU 5440 | CB ARG B 148  | 5770    | 9390  | 5960   | 2020 | -1020 | 380 | C0 |
| ATOM 5441   | CG ARG B 148  | -70.248 | 8.323 | 14.477 | 1.00 | 59.53 |     | C0 |
| ANISOU 5441 | CG ARG B 148  | 6060    | 10070 | 6490   | 2280 | -1010 | 430 | C0 |
| ATOM 5442   | CD ARG B 148  | -71.417 | 7.369 | 14.330 | 1.00 | 62.77 |     | C0 |
| ANISOU 5442 | CD ARG B 148  | 6080    | 10830 | 6940   | 2200 | -1120 | 390 | C0 |
| ATOM 5443   | NE ARG B 148  | -71.648 | 6.950 | 12.949 | 1.00 | 65.53 |     | N0 |
| ANISOU 5443 | NE ARG B 148  | 6370    | 11330 | 7200   | 2150 | -1310 | 380 | N0 |
| ATOM 5444   | CZ ARG B 148  | -72.273 | 5.830 | 12.584 | 1.00 | 67.27 |     | C0 |
| ANISOU 5444 | CZ ARG B 148  | 6310    | 11800 | 7450   | 1960 | -1430 | 310 | C0 |
| ATOM 5445   | NH1 ARG B 148 | -72.731 | 4.986 | 13.496 | 1.00 | 67.46 |     | N0 |
| ANISOU 5445 | NH1 ARG B 148 | 6100    | 11930 | 7610   | 1790 | -1370 | 250 | N0 |
| ATOM 5446   | NH2 ARG B 148 | -72.436 | 5.551 | 11.301 | 1.00 | 68.75 |     | N0 |
| ANISOU 5446 | NH2 ARG B 148 | 6490    | 12110 | 7530   | 1930 | -1610 | 300 | N0 |
| ATOM 5447   | H ARG B 148   | -67.793 | 7.400 | 16.119 | 1.00 | 49.54 |     | H0 |
| ANISOU 5447 | H ARG B 148   | 5120    | 8320  | 5380   | 1790 | -750  | 300 | H0 |
| ATOM 5448   | HA ARG B 148  | -69.269 | 5.816 | 14.473 | 1.00 | 52.87 |     | H0 |
| ANISOU 5448 | HA ARG B 148  | 5100    | 9230  | 5760   | 1650 | -1030 | 250 | H0 |
| ATOM 5449   | HB2 ARG B 148 | -68.243 | 8.430 | 14.054 | 1.00 | 54.88 |     | H0 |
| ANISOU 5449 | HB2 ARG B 148 | 5910    | 9090  | 5850   | 2070 | -940  | 410 | H0 |
| ATOM 5450   | HB3 ARG B 148 | -69.058 | 7.683 | 12.927 | 1.00 | 56.41 |     | H0 |
| ANISOU 5450 | HB3 ARG B 148 | 5870    | 9570  | 5990   | 2030 | -1120 | 400 | H0 |
| ATOM 5451   | HG2 ARG B 148 | -70.116 | 8.517 | 15.430 | 1.00 | 58.85 |     | H0 |

|             |                |         |       |        |      |       |     |    |
|-------------|----------------|---------|-------|--------|------|-------|-----|----|
| ANISOU 5451 | HG2 ARG B 148  | 6010    | 9890  | 6460   | 2290 | -890  | 420 | H0 |
| ATOM 5452   | HG3 ARG B 148  | -70.470 | 9.167 | 14.028 | 1.00 | 60.80 |     | H0 |
| ANISOU 5452 | HG3 ARG B 148  | 6310    | 10220 | 6570   | 2490 | -1040 | 500 | H0 |
| ATOM 5453   | HD2 ARG B 148  | -71.254 | 6.579 | 14.886 | 1.00 | 61.59 |     | H0 |
| ANISOU 5453 | HD2 ARG B 148  | 5850    | 10670 | 6880   | 2000 | -1060 | 320 | H0 |
| ATOM 5454   | HD3 ARG B 148  | -72.226 | 7.807 | 14.667 | 1.00 | 64.30 |     | H0 |
| ANISOU 5454 | HD3 ARG B 148  | 6140    | 11140 | 7150   | 2390 | -1100 | 420 | H0 |
| ATOM 5455   | HE ARG B 148   | -71.366 | 7.478 | 12.315 | 1.00 | 65.69 |     | H0 |
| ANISOU 5455 | HE ARG B 148   | 6540    | 11280 | 7130   | 2250 | -1350 | 420 | H0 |
| ATOM 5456   | HH11 ARG B 148 | -72.630 | 5.159 | 14.347 | 1.00 | 66.57 |     | H0 |
| ANISOU 5456 | HH11 ARG B 148 | 6000    | 11740 | 7560   | 1810 | -1250 | 260 | H0 |
| ATOM 5457   | HH12 ARG B 148 | -73.138 | 4.251 | 13.244 | 1.00 | 67.94 |     | H0 |
| ANISOU 5457 | HH12 ARG B 148 | 5990    | 12140 | 7690   | 1650 | -1450 | 210 | H0 |
| ATOM 5458   | HH21 ARG B 148 | -72.132 | 6.107 | 10.688 | 1.00 | 68.80 |     | H0 |
| ANISOU 5458 | HH21 ARG B 148 | 6660    | 12040 | 7440   | 2050 | -1650 | 350 | H0 |
| ATOM 5459   | HH22 ARG B 148 | -72.844 | 4.809 | 11.061 | 1.00 | 69.23 |     | H0 |
| ANISOU 5459 | HH22 ARG B 148 | 6380    | 12320 | 7610   | 1790 | -1700 | 250 | H0 |
| ATOM 5460   | N GLU B 149    | -66.175 | 5.688 | 14.036 | 1.00 | 47.08 |     | N0 |
| ANISOU 5460 | N GLU B 149    | 4950    | 7960  | 4980   | 1350 | -900  | 220 | N0 |
| ATOM 5461   | CA GLU B 149   | -65.033 | 5.160 | 13.236 | 1.00 | 45.83 |     | C0 |
| ANISOU 5461 | CA GLU B 149   | 4960    | 7690  | 4760   | 1180 | -910  | 190 | C0 |
| ATOM 5462   | C GLU B 149    | -64.558 | 3.814 | 13.804 | 1.00 | 44.28 |     | C0 |
| ANISOU 5462 | C GLU B 149    | 4690    | 7480  | 4660   | 910  | -860  | 90  | C0 |
| ATOM 5463   | O GLU B 149    | -64.327 | 2.889 | 13.000 | 1.00 | 44.07 |     | O0 |
| ANISOU 5463 | O GLU B 149    | 4650    | 7500  | 4590   | 770  | -930  | 40  | O0 |
| ATOM 5464   | CB GLU B 149   | -63.921 | 6.207 | 13.161 | 1.00 | 44.93 |     | C0 |
| ANISOU 5464 | CB GLU B 149   | 5130    | 7330  | 4610   | 1240 | -820  | 260 | C0 |
| ATOM 5465   | CG GLU B 149   | -64.250 | 7.350 | 12.209 | 1.00 | 46.71 |     | C0 |
| ANISOU 5465 | CG GLU B 149   | 5490    | 7560  | 4710   | 1470 | -890  | 360 | C0 |
| ATOM 5466   | CD GLU B 149   | -63.230 | 8.476 | 12.149 | 1.00 | 46.45 |     | C0 |
| ANISOU 5466 | CD GLU B 149   | 5750    | 7270  | 4630   | 1530 | -790  | 440 | C0 |
| ATOM 5467   | OE1 GLU B 149  | -62.164 | 8.346 | 12.777 | 1.00 | 44.61 |     | O0 |
| ANISOU 5467 | OE1 GLU B 149  | 5620    | 6870  | 4470   | 1370 | -690  | 410 | O0 |
| ATOM 5468   | OE2 GLU B 149  | -63.506 | 9.489 | 11.478 | 1.00 | 48.27 |     | O0 |
| ANISOU 5468 | OE2 GLU B 149  | 6110    | 7470  | 4760   | 1730 | -830  | 530 | O0 |
| ATOM 5469   | H GLU B 149    | -65.943 | 5.928 | 14.880 | 1.00 | 46.50 |     | H0 |
| ANISOU 5469 | H GLU B 149    | 4920    | 7790  | 4960   | 1360 | -810  | 220 | H0 |
| ATOM 5470   | HA GLU B 149   | -65.358 | 5.000 | 12.320 | 1.00 | 46.79 |     | H0 |
| ANISOU 5470 | HA GLU B 149   | 5050    | 7920  | 4810   | 1200 | -1010 | 190 | H0 |
| ATOM 5471   | HB2 GLU B 149  | -63.769 | 6.571 | 14.059 | 1.00 | 44.43 |     | H0 |
| ANISOU 5471 | HB2 GLU B 149  | 5100    | 7170  | 4610   | 1260 | -740  | 260 | H0 |
| ATOM 5472   | HB3 GLU B 149  | -63.095 | 5.771 | 12.866 | 1.00 | 43.96 |     | H0 |
| ANISOU 5472 | HB3 GLU B 149  | 5090    | 7130  | 4470   | 1110 | -800  | 240 | H0 |
| ATOM 5473   | HG2 GLU B 149  | -64.355 | 6.984 | 11.305 | 1.00 | 47.29 |     | H0 |
| ANISOU 5473 | HG2 GLU B 149  | 5540    | 7720  | 4710   | 1450 | -970  | 360 | H0 |
| ATOM 5474   | HG3 GLU B 149  | -65.115 | 7.735 | 12.469 | 1.00 | 47.88 |     | H0 |
| ANISOU 5474 | HG3 GLU B 149  | 5540    | 7800  | 4860   | 1620 | -910  | 380 | H0 |
| ATOM 5475   | N ILE B 150    | -64.398 | 3.696 | 15.123 | 1.00 | 44.15 |     | N0 |
| ANISOU 5475 | N ILE B 150    | 4640    | 7380  | 4750   | 860  | -750  | 70  | N0 |
| ATOM 5476   | CA ILE B 150   | -64.059 | 2.406 | 15.801 | 1.00 | 43.50 |     | C0 |
| ANISOU 5476 | CA ILE B 150   | 4480    | 7290  | 4760   | 640  | -700  | -10 | C0 |
| ATOM 5477   | C ILE B 150    | -65.030 | 2.178 | 16.965 | 1.00 | 45.24 |     | C0 |
| ANISOU 5477 | C ILE B 150    | 4500    | 7610  | 5070   | 650  | -650  | -30 | C0 |
| ATOM 5478   | O ILE B 150    | -65.095 | 3.042 | 17.873 | 1.00 | 45.48 |     | O0 |



|                            |         |        |        |      |       |      |    |
|----------------------------|---------|--------|--------|------|-------|------|----|
| ANISOU 5478 O ILE B 150    | 4580    | 7570   | 5130   | 780  | -560  | 10   | O0 |
| ATOM 5479 CB ILE B 150     | -62.592 | 2.378  | 16.276 | 1.00 | 41.44 |      | C0 |
| ANISOU 5479 CB ILE B 150   | 4420    | 6800   | 4520   | 540  | -590  | -20  | C0 |
| ATOM 5480 CG1 ILE B 150    | -61.607 | 2.434  | 15.102 | 1.00 | 40.76 |      | C0 |
| ANISOU 5480 CG1 ILE B 150  | 4500    | 6640   | 4350   | 500  | -620  | 0    | C0 |
| ATOM 5481 CG2 ILE B 150    | -62.334 | 1.166  | 17.167 | 1.00 | 40.39 |      | C0 |
| ANISOU 5481 CG2 ILE B 150  | 4220    | 6650   | 4480   | 350  | -530  | -90  | C0 |
| ATOM 5482 CD1 ILE B 150    | -60.149 | 2.376  | 15.515 | 1.00 | 38.68 |      | C0 |
| ANISOU 5482 CD1 ILE B 150  | 4400    | 6190   | 4110   | 400  | -520  | 0    | C0 |
| ATOM 5483 H ILE B 150      | -64.476 | 4.400  | 15.696 | 1.00 | 44.18 |      | H0 |
| ANISOU 5483 H ILE B 150    | 4680    | 7330   | 4770   | 970  | -690  | 100  | H0 |
| ATOM 5484 HA ILE B 150     | -64.179 | 1.685  | 15.159 | 1.00 | 43.86 |      | H0 |
| ANISOU 5484 HA ILE B 150   | 4480    | 7410   | 4780   | 540  | -770  | -50  | H0 |
| ATOM 5485 HB ILE B 150     | -62.443 | 3.187  | 16.824 | 1.00 | 41.30 |      | H0 |
| ANISOU 5485 HB ILE B 150   | 4470    | 6700   | 4520   | 630  | -540  | 20   | H0 |
| ATOM 5486 HG12 ILE B 150   | -61.794 | 1.683  | 14.499 | 1.00 | 41.03 |      | H0 |
| ANISOU 5486 HG12 ILE B 150 | 4480    | 6750   | 4360   | 430  | -680  | -40  | H0 |
| ATOM 5487 HG13 ILE B 150   | -61.760 | 3.265  | 14.604 | 1.00 | 41.51 |      | H0 |
| ANISOU 5487 HG13 ILE B 150 | 4660    | 6730   | 4380   | 630  | -650  | 50   | H0 |
| ATOM 5488 HG21 ILE B 150   | -62.842 | 1.251  | 17.992 | 1.00 | 40.56 |      | H0 |
| ANISOU 5488 HG21 ILE B 150 | 4160    | 6700   | 4550   | 380  | -490  | -90  | H0 |
| ATOM 5489 HG22 ILE B 150   | -61.387 | 1.110  | 17.380 | 1.00 | 39.28 |      | H0 |
| ANISOU 5489 HG22 ILE B 150 | 4190    | 6390   | 4350   | 300  | -470  | -90  | H0 |
| ATOM 5490 HG23 ILE B 150   | -62.608 | 0.356  | 16.703 | 1.00 | 40.70 |      | H0 |
| ANISOU 5490 HG23 ILE B 150 | 4180    | 6770   | 4510   | 260  | -580  | -130 | H0 |
| ATOM 5491 HD11 ILE B 150   | -60.027 | 2.858  | 16.350 | 1.00 | 38.44 |      | H0 |
| ANISOU 5491 HD11 ILE B 150 | 4390    | 6090   | 4130   | 430  | -460  | 10   | H0 |
| ATOM 5492 HD12 ILE B 150   | -59.599 | 2.783  | 14.824 | 1.00 | 38.90 |      | H0 |
| ANISOU 5492 HD12 ILE B 150 | 4540    | 6160   | 4080   | 430  | -520  | 30   | H0 |
| ATOM 5493 HD13 ILE B 150   | -59.881 | 1.449  | 15.635 | 1.00 | 38.19 |      | H0 |
| ANISOU 5493 HD13 ILE B 150 | 4300    | 6130   | 4080   | 280  | -510  | -50  | H0 |
| ATOM 5494 N SER B 151      | -65.741 | 1.048  | 16.942 | 1.00 | 46.53 |      | N0 |
| ANISOU 5494 N SER B 151    | 4470    | 7930   | 5280   | 500  | -700  | -80  | N0 |
| ATOM 5495 CA SER B 151     | -66.486 | 0.509  | 18.104 | 1.00 | 48.22 |      | C0 |
| ANISOU 5495 CA SER B 151   | 4490    | 8230   | 5590   | 440  | -620  | -100 | C0 |
| ATOM 5496 C SER B 151      | -65.679 | -0.642 | 18.703 | 1.00 | 47.45 |      | C0 |
| ANISOU 5496 C SER B 151    | 4470    | 8010   | 5550   | 220  | -550  | -160 | C0 |
| ATOM 5497 O SER B 151      | -65.196 | -1.487 | 17.926 | 1.00 | 47.54 |      | O0 |
| ANISOU 5497 O SER B 151    | 4540    | 7980   | 5540   | 70   | -610  | -210 | O0 |
| ATOM 5498 CB SER B 151     | -67.867 | 0.065  | 17.725 | 1.00 | 51.29 |      | C0 |
| ANISOU 5498 CB SER B 151   | 4610    | 8880   | 6000   | 420  | -720  | -110 | C0 |
| ATOM 5499 OG SER B 151     | -67.810 | -1.128 | 16.960 | 1.00 | 53.24 |      | O0 |
| ANISOU 5499 OG SER B 151   | 4820    | 9170   | 6240   | 200  | -810  | -180 | O0 |
| ATOM 5500 H SER B 151      | -65.822 | 0.522  | 16.204 | 1.00 | 47.06 |      | H0 |
| ANISOU 5500 H SER B 151    | 4510    | 8060   | 5320   | 420  | -770  | -110 | H0 |
| ATOM 5501 HA SER B 151     | -66.560 | 1.228  | 18.784 | 1.00 | 48.25 |      | H0 |
| ANISOU 5501 HA SER B 151   | 4520    | 8200   | 5610   | 570  | -550  | -70  | H0 |
| ATOM 5502 HB2 SER B 151    | -68.398 | -0.090 | 18.539 | 1.00 | 51.91 |      | H0 |
| ANISOU 5502 HB2 SER B 151  | 4560    | 9030   | 6140   | 410  | -650  | -110 | H0 |
| ATOM 5503 HB3 SER B 151    | -68.307 | 0.772  | 17.200 | 1.00 | 52.56 |      | H0 |
| ANISOU 5503 HB3 SER B 151  | 4730    | 9130   | 6110   | 570  | -780  | -70  | H0 |
| ATOM 5504 N VAL B 152      | -65.524 | -0.653 | 20.028 | 1.00 | 47.27 |      | N0 |
| ANISOU 5504 N VAL B 152    | 4460    | 7910   | 5600   | 210  | -420  | -150 | N0 |
| ATOM 5505 CA VAL B 152     | -64.864 | -1.757 | 20.784 | 1.00 | 47.40 |      | C0 |

|                            |         |        |        |      |       |      |    |
|----------------------------|---------|--------|--------|------|-------|------|----|
| ANISOU 5505 CA VAL B 152   | 4530    | 7810   | 5670   | 20   | -330  | -200 | C0 |
| ATOM 5506 C VAL B 152      | -65.938 | -2.505 | 21.578 | 1.00 | 50.84 |      | C0 |
| ANISOU 5506 C VAL B 152    | 4760    | 8380   | 6180   | -70  | -280  | -210 | C0 |
| ATOM 5507 O VAL B 152      | -66.767 | -1.842 | 22.216 | 1.00 | 52.32 |      | O0 |
| ANISOU 5507 O VAL B 152    | 4820    | 8680   | 6380   | 60   | -230  | -160 | O0 |
| ATOM 5508 CB VAL B 152     | -63.730 | -1.246 | 21.693 | 1.00 | 44.88 |      | C0 |
| ANISOU 5508 CB VAL B 152   | 4410    | 7300   | 5350   | 70   | -230  | -180 | C0 |
| ATOM 5509 CG1 VAL B 152    | -62.506 | -0.851 | 20.889 | 1.00 | 43.58 |      | C0 |
| ANISOU 5509 CG1 VAL B 152  | 4440    | 7000   | 5120   | 80   | -270  | -180 | C0 |
| ATOM 5510 CG2 VAL B 152    | -64.164 | -0.099 | 22.591 | 1.00 | 45.40 |      | C0 |
| ANISOU 5510 CG2 VAL B 152  | 4470    | 7370   | 5410   | 260  | -160  | -140 | C0 |
| ATOM 5511 H VAL B 152      | -65.838 | 0.015  | 20.561 | 1.00 | 47.80 |      | H0 |
| ANISOU 5511 H VAL B 152    | 4500    | 7990   | 5670   | 330  | -370  | -120 | H0 |
| ATOM 5512 HA VAL B 152     | -64.478 | -2.372 | 20.141 | 1.00 | 47.08 |      | H0 |
| ANISOU 5512 HA VAL B 152   | 4540    | 7740   | 5610   | -80  | -380  | -230 | H0 |
| ATOM 5513 HB VAL B 152     | -63.467 | -1.998 | 22.279 | 1.00 | 44.48 |      | H0 |
| ANISOU 5513 HB VAL B 152   | 4370    | 7200   | 5330   | -40  | -180  | -200 | H0 |
| ATOM 5514 HG11 VAL B 152   | -62.183 | -1.620 | 20.389 | 1.00 | 43.35 |      | H0 |
| ANISOU 5514 HG11 VAL B 152 | 4430    | 6960   | 5090   | -30  | -300  | -210 | H0 |
| ATOM 5515 HG12 VAL B 152   | -61.808 | -0.540 | 21.491 | 1.00 | 42.78 |      | H0 |
| ANISOU 5515 HG12 VAL B 152 | 4440    | 6780   | 5030   | 100  | -210  | -170 | H0 |
| ATOM 5516 HG13 VAL B 152   | -62.740 | -0.138 | 20.270 | 1.00 | 44.22 |      | H0 |
| ANISOU 5516 HG13 VAL B 152 | 4530    | 7110   | 5160   | 190  | -320  | -150 | H0 |
| ATOM 5517 HG21 VAL B 152   | -64.302 | 0.699  | 22.054 | 1.00 | 45.83 |      | H0 |
| ANISOU 5517 HG21 VAL B 152 | 4550    | 7440   | 5430   | 380  | -210  | -110 | H0 |
| ATOM 5518 HG22 VAL B 152   | -63.471 | 0.073  | 23.251 | 1.00 | 44.46 |      | H0 |
| ANISOU 5518 HG22 VAL B 152 | 4470    | 7130   | 5290   | 260  | -100  | -140 | H0 |
| ATOM 5519 HG23 VAL B 152   | -64.991 | -0.332 | 23.046 | 1.00 | 46.28 |      | H0 |
| ANISOU 5519 HG23 VAL B 152 | 4440    | 7590   | 5560   | 260  | -130  | -130 | H0 |
| ATOM 5520 N ASP B 153      | -65.935 | -3.836 | 21.510 | 1.00 | 54.21 |      | N0 |
| ANISOU 5520 N ASP B 153    | 5150    | 8810   | 6640   | -290 | -290  | -260 | N0 |
| ATOM 5521 CA ASP B 153     | -66.789 | -4.705 | 22.362 | 1.00 | 58.92 |      | C0 |
| ANISOU 5521 CA ASP B 153   | 5580    | 9490   | 7310   | -430 | -220  | -260 | C0 |
| ATOM 5522 C ASP B 153      | -65.910 | -5.795 | 22.969 | 1.00 | 59.35 |      | C0 |
| ANISOU 5522 C ASP B 153    | 5790    | 9370   | 7390   | -590 | -130  | -290 | C0 |
| ATOM 5523 O ASP B 153      | -64.954 | -6.247 | 22.342 | 1.00 | 56.89 |      | O0 |
| ANISOU 5523 O ASP B 153    | 5650    | 8930   | 7040   | -660 | -180  | -330 | O0 |
| ATOM 5524 CB ASP B 153     | -67.987 | -5.259 | 21.579 | 1.00 | 62.40 |      | C0 |
| ANISOU 5524 CB ASP B 153   | 5790    | 10150  | 7770   | -550 | -320  | -280 | C0 |
| ATOM 5525 CG ASP B 153     | -67.648 | -6.348 | 20.574 | 1.00 | 63.37 |      | C0 |
| ANISOU 5525 CG ASP B 153   | 5990    | 10220  | 7870   | -750 | -430  | -360 | C0 |
| ATOM 5526 OD1 ASP B 153    | -66.569 | -6.266 | 19.968 | 1.00 | 64.09 |      | O0 |
| ANISOU 5526 OD1 ASP B 153  | 6290    | 10160  | 7900   | -720 | -470  | -380 | O0 |
| ATOM 5527 OD2 ASP B 153    | -68.471 | -7.270 | 20.404 | 1.00 | 66.47 |      | O0 |
| ANISOU 5527 OD2 ASP B 153  | 6230    | 10720  | 8310   | -950 | -470  | -400 | O0 |
| ATOM 5528 H ASP B 153      | -65.407 | -4.298 | 20.929 | 1.00 | 53.70 |      | H0 |
| ANISOU 5528 H ASP B 153    | 5180    | 8680   | 6550   | -370 | -340  | -290 | H0 |
| ATOM 5529 HA ASP B 153     | -67.143 | -4.151 | 23.095 | 1.00 | 59.03 |      | H0 |
| ANISOU 5529 HA ASP B 153   | 5540    | 9550   | 7340   | -320 | -140  | -220 | H0 |
| ATOM 5530 HB2 ASP B 153    | -68.635 | -5.624 | 22.216 | 1.00 | 63.23 |      | H0 |
| ANISOU 5530 HB2 ASP B 153  | 5760    | 10330  | 7930   | -610 | -260  | -270 | H0 |
| ATOM 5531 HB3 ASP B 153    | -68.416 | -4.523 | 21.097 | 1.00 | 63.00 |      | H0 |
| ANISOU 5531 HB3 ASP B 153  | 5780    | 10330  | 7820   | -420 | -390  | -260 | H0 |
| ATOM 5532 N PRO B 154      | -66.186 | -6.229 | 24.218 | 1.00 | 62.32 |      | N0 |

|                            |                                   |    |
|----------------------------|-----------------------------------|----|
| ANISOU 5532 N PRO B 154    | 6130 9730 7820 -650 0 -270        | N0 |
| ATOM 5533 CA PRO B 154     | -65.511 -7.396 24.783 1.00 63.76  | C0 |
| ANISOU 5533 CA PRO B 154   | 6450 9760 8020 -810 70 -290       | C0 |
| ATOM 5534 C PRO B 154      | -66.002 -8.701 24.133 1.00 68.81  | C0 |
| ANISOU 5534 C PRO B 154    | 7030 10430 8690 -1050 10 -340     | C0 |
| ATOM 5535 O PRO B 154      | -67.190 -8.822 23.884 1.00 69.69  | O0 |
| ANISOU 5535 O PRO B 154    | 6920 10720 8840 -1130 -30 -340    | O0 |
| ATOM 5536 CB PRO B 154     | -65.859 -7.335 26.275 1.00 62.97  | C0 |
| ANISOU 5536 CB PRO B 154   | 6310 9670 7950 -770 220 -230      | C0 |
| ATOM 5537 CG PRO B 154     | -67.160 -6.559 26.333 1.00 64.74  | C0 |
| ANISOU 5537 CG PRO B 154   | 6290 10110 8190 -670 230 -200     | C0 |
| ATOM 5538 CD PRO B 154     | -67.136 -5.608 25.153 1.00 63.82  | C0 |
| ANISOU 5538 CD PRO B 154   | 6160 10060 8030 -540 90 -210      | C0 |
| ATOM 5539 HA PRO B 154     | -64.534 -7.301 24.667 1.00 62.46  | H0 |
| ANISOU 5539 HA PRO B 154   | 6450 9470 7820 -770 60 -300       | H0 |
| ATOM 5540 HB2 PRO B 154    | -65.974 -8.236 26.646 1.00 63.75  | H0 |
| ANISOU 5540 HB2 PRO B 154  | 6420 9730 8070 -910 270 -230      | H0 |
| ATOM 5541 HB3 PRO B 154    | -65.156 -6.873 26.780 1.00 62.13  | H0 |
| ANISOU 5541 HB3 PRO B 154  | 6330 9460 7810 -670 260 -220      | H0 |
| ATOM 5542 HG2 PRO B 154    | -67.926 -7.165 26.269 1.00 65.88  | H0 |
| ANISOU 5542 HG2 PRO B 154  | 6290 10360 8380 -800 230 -200     | H0 |
| ATOM 5543 HG3 PRO B 154    | -67.227 -6.060 27.173 1.00 64.47  | H0 |
| ANISOU 5543 HG3 PRO B 154  | 6260 10080 8150 -560 320 -160     | H0 |
| ATOM 5544 HD2 PRO B 154    | -68.021 -5.529 24.751 1.00 65.27  | H0 |
| ANISOU 5544 HD2 PRO B 154  | 6160 10400 8240 -540 40 -210      | H0 |
| ATOM 5545 HD3 PRO B 154    | -66.831 -4.722 25.423 1.00 63.23  | H0 |
| ANISOU 5545 HD3 PRO B 154  | 6150 9940 7930 -380 110 -190      | H0 |
| ATOM 5546 N THR B 155      | -65.070 -9.617 23.849 1.00 73.18  | N0 |
| ANISOU 5546 N THR B 155    | 7780 10800 9220 -1160 0 -380      | N0 |
| ATOM 5547 CA THR B 155     | -65.329 -11.013 23.399 1.00 79.02 | C0 |
| ANISOU 5547 CA THR B 155   | 8550 11500 9980 -1400 -30 -440    | C0 |
| ATOM 5548 C THR B 155      | -65.357 -11.928 24.628 1.00 83.42 | C0 |
| ANISOU 5548 C THR B 155    | 9160 11950 10580 -1520 110 -400   | C0 |
| ATOM 5549 O THR B 155      | -64.288 -12.475 24.988 1.00 83.78 | O0 |
| ANISOU 5549 O THR B 155    | 9430 11800 10600 -1510 170 -400   | O0 |
| ATOM 5550 CB THR B 155     | -64.267 -11.490 22.397 1.00 79.04 | C0 |
| ANISOU 5550 CB THR B 155   | 8770 11350 9910 -1410 -110 -500   | C0 |
| ATOM 5551 OG1 THR B 155    | -63.963 -10.401 21.526 1.00 79.44 | O0 |
| ANISOU 5551 OG1 THR B 155  | 8810 11470 9910 -1250 -200 -500   | O0 |
| ATOM 5552 CG2 THR B 155    | -64.712 -12.694 21.595 1.00 80.52 | C0 |
| ANISOU 5552 CG2 THR B 155  | 8980 11520 10100 -1640 -190 -580  | C0 |
| ATOM 5553 H THR B 155      | -64.179 -9.441 23.915 1.00 71.55  | H0 |
| ANISOU 5553 H THR B 155    | 7720 10490 8980 -1080 10 -380     | H0 |
| ATOM 5554 HA THR B 155     | -66.211 -11.039 22.963 1.00 80.36 | H0 |
| ANISOU 5554 HA THR B 155   | 8560 11800 10170 -1470 -100 -450  | H0 |
| ATOM 5555 HB THR B 155     | -63.452 -11.728 22.898 1.00 78.03 | H0 |
| ANISOU 5555 HB THR B 155   | 8780 11090 9780 -1380 -40 -490    | H0 |
| ATOM 5556 HG21 THR B 155   | -64.878 -13.443 22.196 1.00 81.14 | H0 |
| ANISOU 5556 HG21 THR B 155 | 9080 11530 10220 -1760 -120 -570  | H0 |
| ATOM 5557 HG22 THR B 155   | -64.015 -12.937 20.960 1.00 80.02 | H0 |
| ANISOU 5557 HG22 THR B 155 | 9060 11360 9980 -1630 -230 -620   | H0 |
| ATOM 5558 HG23 THR B 155   | -65.530 -12.479 21.112 1.00 81.70 | H0 |
| ANISOU 5558 HG23 THR B 155 | 8970 11810 10260 -1680 -270 -590  | H0 |
| ATOM 5559 N THR B 156      | -66.527 -12.065 25.258 1.00 88.10 | N0 |

|             |      |           |         |         |        |       |       |      |    |
|-------------|------|-----------|---------|---------|--------|-------|-------|------|----|
| ANISOU 5559 | N    | THR B 156 | 9550    | 12680   | 11240  | -1610 | 180   | -360 | N0 |
| ATOM 5560   | CA   | THR B 156 | -66.740 | -12.905 | 26.467 | 1.00  | 90.98 |      | C0 |
| ANISOU 5560 | CA   | THR B 156 | 9950    | 12970   | 11640  | -1730 | 330   | -320 | C0 |
| ATOM 5561   | C    | THR B 156 | -67.403 | -14.218 | 26.039 | 1.00  | 93.27 |      | C0 |
| ANISOU 5561 | C    | THR B 156 | 10210   | 13250   | 11980  | -2030 | 310   | -360 | C0 |
| ATOM 5562   | O    | THR B 156 | -68.644 | -14.238 | 25.906 | 1.00  | 95.99 |      | O0 |
| ANISOU 5562 | O    | THR B 156 | 10300   | 13790   | 12380  | -2160 | 290   | -350 | O0 |
| ATOM 5563   | CB   | THR B 156 | -67.537 | -12.148 | 27.538 | 1.00  | 92.55 |      | C0 |
| ANISOU 5563 | CB   | THR B 156 | 9960    | 13330   | 11870  | -1630 | 450   | -240 | C0 |
| ATOM 5564   | OG1  | THR B 156 | -68.727 | -11.632 | 26.941 | 1.00  | 94.87 |      | O0 |
| ANISOU 5564 | OG1  | THR B 156 | 9970    | 13870   | 12210  | -1640 | 380   | -240 | O0 |
| ATOM 5565   | CG2  | THR B 156 | -66.748 | -11.016 | 28.160 | 1.00  | 90.86 |      | C0 |
| ANISOU 5565 | CG2  | THR B 156 | 9850    | 13070   | 11600  | -1360 | 500   | -200 | C0 |
| ATOM 5566   | H    | THR B 156 | -67.289 | -11.647 | 24.987 | 1.00  | 88.77 |      | H0 |
| ANISOU 5566 | H    | THR B 156 | 9460    | 12920   | 11340  | -1600 | 130   | -360 | H0 |
| ATOM 5567   | HA   | THR B 156 | -65.855 | -13.118 | 26.843 | 1.00  | 89.57 |      | H0 |
| ANISOU 5567 | HA   | THR B 156 | 9960    | 12640   | 11430  | -1680 | 380   | -310 | H0 |
| ATOM 5568   | HB   | THR B 156 | -67.788 | -12.788 | 28.247 | 1.00  | 93.36 |      | H0 |
| ANISOU 5568 | HB   | THR B 156 | 10070   | 13400   | 12000  | -1740 | 560   | -200 | H0 |
| ATOM 5569   | HG21 | THR B 156 | -66.011 | -11.381 | 28.682 | 1.00  | 89.83 |      | H0 |
| ANISOU 5569 | HG21 | THR B 156 | 9890    | 12790   | 11450  | -1360 | 550   | -190 | H0 |
| ATOM 5570   | HG22 | THR B 156 | -67.330 | -10.495 | 28.742 | 1.00  | 91.29 |      | H0 |
| ANISOU 5570 | HG22 | THR B 156 | 9780    | 13230   | 11670  | -1290 | 560   | -160 | H0 |
| ATOM 5571   | HG23 | THR B 156 | -66.394 | -10.441 | 27.458 | 1.00  | 89.82 |      | H0 |
| ANISOU 5571 | HG23 | THR B 156 | 9740    | 12950   | 11440  | -1270 | 400   | -230 | H0 |
| ATOM 5572   | N    | GLU B 157 | -66.594 | -15.261 | 25.826 | 1.00  | 93.20 |      | N0 |
| ANISOU 5572 | N    | GLU B 157 | 10460   | 13010   | 11940  | -2140 | 300   | -400 | N0 |
| ATOM 5573   | CA   | GLU B 157 | -67.055 | -16.640 | 25.511 | 1.00  | 95.96 |      | C0 |
| ANISOU 5573 | CA   | GLU B 157 | 10870   | 13270   | 12320  | -2440 | 290   | -450 | C0 |
| ATOM 5574   | C    | GLU B 157 | -67.263 | -17.423 | 26.818 | 1.00  | 96.58 |      | C0 |
| ANISOU 5574 | C    | GLU B 157 | 11010   | 13240   | 12440  | -2550 | 480   | -370 | C0 |
| ATOM 5575   | O    | GLU B 157 | -67.484 | -18.652 | 26.735 | 1.00  | 99.20 |      | O0 |
| ANISOU 5575 | O    | GLU B 157 | 11450   | 13440   | 12800  | -2800 | 500   | -400 | O0 |
| ATOM 5576   | CB   | GLU B 157 | -66.051 | -17.337 | 24.587 | 1.00  | 95.76 |      | C0 |
| ANISOU 5576 | CB   | GLU B 157 | 11120   | 13030   | 12230  | -2450 | 210   | -530 | C0 |
| ATOM 5577   | CG   | GLU B 157 | -65.775 | -16.578 | 23.299 | 1.00  | 95.54 |      | C0 |
| ANISOU 5577 | CG   | GLU B 157 | 11060   | 13100   | 12150  | -2330 | 40    | -600 | C0 |
| ATOM 5578   | CD   | GLU B 157 | -66.970 | -16.422 | 22.372 | 1.00  | 97.95 |      | C0 |
| ANISOU 5578 | CD   | GLU B 157 | 11130   | 13620   | 12470  | -2470 | -100  | -660 | C0 |
| ATOM 5579   | OE1  | GLU B 157 | -67.432 | -17.445 | 21.825 | 1.00  | 99.44 |      | O0 |
| ANISOU 5579 | OE1  | GLU B 157 | 11360   | 13750   | 12670  | -2720 | -170  | -730 | O0 |
| ATOM 5580   | OE2  | GLU B 157 | -67.438 | -15.277 | 22.203 | 1.00  | 98.45 |      | O0 |
| ANISOU 5580 | OE2  | GLU B 157 | 10970   | 13890   | 12540  | -2330 | -160  | -620 | O0 |
| ATOM 5581   | H    | GLU B 157 | -65.687 | -15.185 | 25.862 | 1.00  | 91.86 |      | H0 |
| ANISOU 5581 | H    | GLU B 157 | 10450   | 12720   | 11730  | -2030 | 310   | -410 | H0 |
| ATOM 5582   | HA   | GLU B 157 | -67.920 | -16.578 | 25.044 | 1.00  | 97.24 |      | H0 |
| ANISOU 5582 | HA   | GLU B 157 | 10840   | 13580   | 12520  | -2540 | 220   | -470 | H0 |
| ATOM 5583   | HB2  | GLU B 157 | -65.209 | -17.456 | 25.074 | 1.00  | 94.58 |      | H0 |
| ANISOU 5583 | HB2  | GLU B 157 | 11140   | 12740   | 12050  | -2350 | 280   | -510 | H0 |
| ATOM 5584   | HB3  | GLU B 157 | -66.397 | -18.226 | 24.363 | 1.00  | 97.31 |      | H0 |
| ANISOU 5584 | HB3  | GLU B 157 | 11370   | 13160   | 12450  | -2650 | 200   | -570 | H0 |
| ATOM 5585   | HG2  | GLU B 157 | -65.439 | -15.684 | 23.524 | 1.00  | 94.07 |      | H0 |
| ANISOU 5585 | HG2  | GLU B 157 | 10830   | 12970   | 11950  | -2140 | 60    | -560 | H0 |
| ATOM 5586   | HG3  | GLU B 157 | -65.064 | -17.041 | 22.807 | 1.00  | 95.06 |      | H0 |

|             |                |                         |            |    |
|-------------|----------------|-------------------------|------------|----|
| ANISOU 5586 | HG3 GLU B 157  | 11190 12890 12040 -2320 | 10 -650    | H0 |
| ATOM 5587   | N ASN B 158    | -67.204 -16.739 27.970  | 1.00 93.02 | N0 |
| ANISOU 5587 | N ASN B 158    | 10510 12850 11990 -2390 | 610 -280   | N0 |
| ATOM 5588   | CA ASN B 158   | -67.463 -17.305 29.323  | 1.00 92.65 | C0 |
| ANISOU 5588 | CA ASN B 158   | 10500 12740 11970 -2460 | 800 -190   | C0 |
| ATOM 5589   | C ASN B 158    | -66.397 -18.368 29.621  | 1.00 89.95 | C0 |
| ANISOU 5589 | C ASN B 158    | 10510 12090 11570 -2490 | 850 -190   | C0 |
| ATOM 5590   | O ASN B 158    | -66.744 -19.427 30.182  | 1.00 92.74 | O0 |
| ANISOU 5590 | O ASN B 158    | 10950 12330 11950 -2690 | 960 -150   | O0 |
| ATOM 5591   | CB ASN B 158   | -68.895 -17.847 29.434  | 1.00 96.47 | C0 |
| ANISOU 5591 | CB ASN B 158   | 10750 13360 12540 -2740 | 850 -160   | C0 |
| ATOM 5592   | CG ASN B 158   | -69.334 -18.156 30.853  | 1.00 98.14 | C0 |
| ANISOU 5592 | CG ASN B 158   | 10950 13570 12770 -2790 | 1070 -50   | C0 |
| ATOM 5593   | OD1 ASN B 158  | -68.727 -17.695 31.818  | 1.00 98.43 | O0 |
| ANISOU 5593 | OD1 ASN B 158  | 11100 13560 12750 -2570 | 1170 10    | O0 |
| ATOM 5594   | ND2 ASN B 158  | -70.393 -18.939 30.991  | 1.00100.67 | N0 |
| ANISOU 5594 | ND2 ASN B 158  | 11130 13950 13170 -3080 | 1130 -20   | N0 |
| ATOM 5595   | H ASN B 158    | -66.982 -15.859 28.000  | 1.00 92.13 | H0 |
| ANISOU 5595 | H ASN B 158    | 10340 12810 11860 -2210 | 590 -270   | H0 |
| ATOM 5596   | HA ASN B 158   | -67.368 -16.577 29.980  | 1.00 91.80 | H0 |
| ANISOU 5596 | HA ASN B 158   | 10350 12690 11840 -2290 | 860 -140   | H0 |
| ATOM 5597   | HB2 ASN B 158  | -69.509 -17.186 29.052  | 1.00 96.73 | H0 |
| ANISOU 5597 | HB2 ASN B 158  | 10560 13590 12600 -2700 | 790 -170   | H0 |
| ATOM 5598   | HB3 ASN B 158  | -68.964 -18.663 28.898  | 1.00 97.38 | H0 |
| ANISOU 5598 | HB3 ASN B 158  | 10940 13390 12670 -2920 | 800 -210   | H0 |
| ATOM 5599   | HD21 ASN B 158 | -70.654 -19.192 31.797  | 1.00101.63 | H0 |
| ANISOU 5599 | HD21 ASN B 158 | 11250 14070 13300 -3120 | 1270 50    | H0 |
| ATOM 5600   | HD22 ASN B 158 | -70.840 -19.210 30.278  | 1.00101.84 | H0 |
| ANISOU 5600 | HD22 ASN B 158 | 11180 14150 13350 -3230 | 1040 -70   | H0 |
| ATOM 5601   | N SER B 159    | -65.143 -18.092 29.252  | 1.00 84.73 | N0 |
| ANISOU 5601 | N SER B 159    | 10030 11310 10840 -2290 | 780 -230   | N0 |
| ATOM 5602   | CA SER B 159   | -63.989 -19.010 29.441  | 1.00 80.83 | C0 |
| ANISOU 5602 | CA SER B 159   | 9870 10550 10290 -2260  | 810 -230   | C0 |
| ATOM 5603   | C SER B 159    | -63.523 -18.966 30.901  | 1.00 76.52 | C0 |
| ANISOU 5603 | C SER B 159    | 9430 9940 9710 -2130    | 960 -120   | C0 |
| ATOM 5604   | O SER B 159    | -63.999 -18.087 31.659  | 1.00 74.39 | O0 |
| ANISOU 5604 | O SER B 159    | 8990 9830 9440 -2040    | 1020 -70   | O0 |
| ATOM 5605   | CB SER B 159   | -62.863 -18.687 28.490  | 1.00 78.49 | C0 |
| ANISOU 5605 | CB SER B 159   | 9690 10200 9940 -2100   | 690 -300   | C0 |
| ATOM 5606   | OG SER B 159   | -63.068 -19.324 27.238  | 1.00 79.94 | O0 |
| ANISOU 5606 | OG SER B 159   | 9910 10330 10130 -2250  | 580 -390   | O0 |
| ATOM 5607   | H SER B 159    | -64.900 -17.304 28.866  | 1.00 83.44 | H0 |
| ANISOU 5607 | H SER B 159    | 9810 11230 10660 -2160  | 710 -250   | H0 |
| ATOM 5608   | HA SER B 159   | -64.303 -19.934 29.248  | 1.00 82.10 | H0 |
| ANISOU 5608 | HA SER B 159   | 10100 10620 10470 -2450 | 830 -240   | H0 |
| ATOM 5609   | HB2 SER B 159  | -62.809 -17.714 28.359  | 1.00 77.51 | H0 |
| ANISOU 5609 | HB2 SER B 159  | 9440 10200 9810 -1970   | 640 -300   | H0 |
| ATOM 5610   | HB3 SER B 159  | -62.011 -18.992 28.875  | 1.00 77.86 | H0 |
| ANISOU 5610 | HB3 SER B 159  | 9790 9980 9820 -2000    | 730 -270   | H0 |
| ATOM 5611   | N ASP B 160    | -62.658 -19.912 31.280  | 1.00 72.49 | N0 |
| ANISOU 5611 | N ASP B 160    | 9200 9200 9140 -2110    | 1020 -100  | N0 |
| ATOM 5612   | CA ASP B 160   | -61.875 -19.874 32.541  | 1.00 68.84 | C0 |
| ANISOU 5612 | CA ASP B 160   | 8890 8650 8610 -1930    | 1120 -10   | C0 |
| ATOM 5613   | C ASP B 160    | -60.902 -18.695 32.431  | 1.00 63.29 | C0 |

|             |     |           |         |         |        |       |       |      |    |
|-------------|-----|-----------|---------|---------|--------|-------|-------|------|----|
| ANISOU 5613 | C   | ASP B 160 | 8150    | 8030    | 7860   | -1670 | 1030  | -30  | C0 |
| ATOM 5614   | O   | ASP B 160 | -60.135 | -18.657 | 31.446 | 1.00  | 60.97 |      | O0 |
| ANISOU 5614 | O   | ASP B 160 | 7920    | 7690    | 7550   | -1600 | 920   | -100 | O0 |
| ATOM 5615   | CB  | ASP B 160 | -61.164 | -21.207 | 32.794 | 1.00  | 70.43 |      | C0 |
| ANISOU 5615 | CB  | ASP B 160 | 9410    | 8590    | 8760   | -1960 | 1180  | 10   | C0 |
| ATOM 5616   | CG  | ASP B 160 | -60.421 | -21.292 | 34.120 | 1.00  | 71.43 |      | C0 |
| ANISOU 5616 | CG  | ASP B 160 | 9700    | 8630    | 8810   | -1780 | 1280  | 110  | C0 |
| ATOM 5617   | OD1 | ASP B 160 | -60.605 | -20.388 | 34.972 | 1.00  | 70.83 |      | O0 |
| ANISOU 5617 | OD1 | ASP B 160 | 9500    | 8700    | 8710   | -1680 | 1320  | 160  | O0 |
| ATOM 5618   | OD2 | ASP B 160 | -59.662 | -22.269 | 34.296 | 1.00  | 72.64 |      | O0 |
| ANISOU 5618 | OD2 | ASP B 160 | 10120   | 8570    | 8910   | -1750 | 1310  | 140  | O0 |
| ATOM 5619   | H   | ASP B 160 | -62.495 | -20.652 | 30.772 | 1.00  | 73.35 |      | H0 |
| ANISOU 5619 | H   | ASP B 160 | 9430    | 9180    | 9250   | -2200 | 990   | -140 | H0 |
| ATOM 5620   | HA  | ASP B 160 | -62.498 | -19.705 | 33.287 | 1.00  | 69.57 |      | H0 |
| ANISOU 5620 | HA  | ASP B 160 | 8900    | 8820    | 8720   | -1970 | 1210  | 50   | H0 |
| ATOM 5621   | HB2 | ASP B 160 | -61.826 | -21.928 | 32.769 | 1.00  | 72.21 |      | H0 |
| ANISOU 5621 | HB2 | ASP B 160 | 9660    | 8750    | 9020   | -2150 | 1230  | 20   | H0 |
| ATOM 5622   | HB3 | ASP B 160 | -60.519 | -21.362 | 32.073 | 1.00  | 69.94 |      | H0 |
| ANISOU 5622 | HB3 | ASP B 160 | 9430    | 8460    | 8690   | -1910 | 1100  | -40  | H0 |
| ATOM 5623   | N   | ASP B 161 | -60.963 | -17.758 | 33.384 | 1.00  | 59.53 |      | N0 |
| ANISOU 5623 | N   | ASP B 161 | 7590    | 7670    | 7360   | -1530 | 1080  | 20   | N0 |
| ATOM 5624   | CA  | ASP B 161 | -60.127 | -16.528 | 33.416 | 1.00  | 55.82 |      | C0 |
| ANISOU 5624 | CA  | ASP B 161 | 7080    | 7280    | 6850   | -1310 | 1000  | 0    | C0 |
| ATOM 5625   | C   | ASP B 161 | -58.652 | -16.925 | 33.572 | 1.00  | 52.60 |      | C0 |
| ANISOU 5625 | C   | ASP B 161 | 6890    | 6730    | 6370   | -1170 | 960   | 10   | C0 |
| ATOM 5626   | O   | ASP B 161 | -57.804 | -16.195 | 33.042 | 1.00  | 51.75 |      | O0 |
| ANISOU 5626 | O   | ASP B 161 | 6760    | 6660    | 6250   | -1040 | 860   | -30  | O0 |
| ATOM 5627   | CB  | ASP B 161 | -60.592 | -15.570 | 34.520 | 1.00  | 56.13 |      | C0 |
| ANISOU 5627 | CB  | ASP B 161 | 7020    | 7450    | 6860   | -1210 | 1070  | 50   | C0 |
| ATOM 5628   | CG  | ASP B 161 | -62.007 | -15.036 | 34.327 | 1.00  | 57.94 |      | C0 |
| ANISOU 5628 | CG  | ASP B 161 | 7000    | 7860    | 7150   | -1300 | 1100  | 50   | C0 |
| ATOM 5629   | OD1 | ASP B 161 | -62.372 | -14.745 | 33.163 | 1.00  | 56.51 |      | O0 |
| ANISOU 5629 | OD1 | ASP B 161 | 6680    | 7760    | 7030   | -1350 | 1000  | -10  | O0 |
| ATOM 5630   | OD2 | ASP B 161 | -62.744 | -14.924 | 35.344 | 1.00  | 58.85 |      | O0 |
| ANISOU 5630 | OD2 | ASP B 161 | 7060    | 8040    | 7260   | -1300 | 1230  | 120  | O0 |
| ATOM 5631   | H   | ASP B 161 | -61.531 | -17.827 | 34.092 | 1.00  | 60.71 |      | H0 |
| ANISOU 5631 | H   | ASP B 161 | 7700    | 7850    | 7510   | -1580 | 1170  | 70   | H0 |
| ATOM 5632   | HA  | ASP B 161 | -60.232 | -16.068 | 32.551 | 1.00  | 55.22 |      | H0 |
| ANISOU 5632 | HA  | ASP B 161 | 6900    | 7280    | 6800   | -1310 | 910   | -50  | H0 |
| ATOM 5633   | HB2 | ASP B 161 | -60.554 | -16.035 | 35.381 | 1.00  | 56.90 |      | H0 |
| ANISOU 5633 | HB2 | ASP B 161 | 7220    | 7490    | 6920   | -1210 | 1160  | 110  | H0 |
| ATOM 5634   | HB3 | ASP B 161 | -59.979 | -14.808 | 34.557 | 1.00  | 55.03 |      | H0 |
| ANISOU 5634 | HB3 | ASP B 161 | 6880    | 7340    | 6690   | -1070 | 1010  | 40   | H0 |
| ATOM 5635   | N   | SER B 162 | -58.372 | -18.043 | 34.252 | 1.00  | 51.73 |      | N0 |
| ANISOU 5635 | N   | SER B 162 | 6980    | 6460    | 6220   | -1190 | 1050  | 70   | N0 |
| ATOM 5636   | CA  | SER B 162 | -57.008 | -18.569 | 34.541 | 1.00  | 50.20 |      | C0 |
| ANISOU 5636 | CA  | SER B 162 | 7000    | 6130    | 5950   | -1040 | 1030  | 90   | C0 |
| ATOM 5637   | C   | SER B 162 | -56.604 | -19.661 | 33.538 | 1.00  | 49.06 |      | C0 |
| ANISOU 5637 | C   | SER B 162 | 7000    | 5830    | 5820   | -1100 | 1000  | 50   | C0 |
| ATOM 5638   | O   | SER B 162 | -55.578 | -20.322 | 33.783 | 1.00  | 48.88 |      | O0 |
| ANISOU 5638 | O   | SER B 162 | 7170    | 5670    | 5730   | -980  | 1010  | 80   | O0 |
| ATOM 5639   | CB  | SER B 162 | -56.930 | -19.098 | 35.958 | 1.00  | 51.22 |      | C0 |
| ANISOU 5639 | CB  | SER B 162 | 7280    | 6170    | 6000   | -990  | 1150  | 190  | C0 |
| ATOM 5640   | OG  | SER B 162 | -57.346 | -18.119 | 36.897 | 1.00  | 50.88 |      | O0 |

|             |               |         |         |        |       |       |      |    |
|-------------|---------------|---------|---------|--------|-------|-------|------|----|
| ANISOU 5640 | OG SER B 162  | 7130    | 6270    | 5930   | -930  | 1180  | 220  | O0 |
| ATOM 5641   | H SER B 162   | -59.019 | -18.575 | 34.609 | 1.00  | 53.12 |      | H0 |
| ANISOU 5641 | H SER B 162   | 7170    | 6600    | 6410   | -1300 | 1130  | 100  | H0 |
| ATOM 5642   | HA SER B 162  | -56.365 | -17.816 | 34.453 | 1.00  | 48.86 |      | H0 |
| ANISOU 5642 | HA SER B 162  | 6780    | 6020    | 5760   | -910  | 960   | 70   | H0 |
| ATOM 5643   | HB2 SER B 162 | -57.503 | -19.894 | 36.040 | 1.00  | 52.51 |      | H0 |
| ANISOU 5643 | HB2 SER B 162 | 7510    | 6250    | 6180   | -1120 | 1220  | 220  | H0 |
| ATOM 5644   | HB3 SER B 162 | -56.005 | -19.367 | 36.156 | 1.00  | 50.97 |      | H0 |
| ANISOU 5644 | HB3 SER B 162 | 7380    | 6070    | 5920   | -870  | 1120  | 210  | H0 |
| ATOM 5645   | N GLU B 163   | -57.369 | -19.855 | 32.459 | 1.00  | 48.75 |      | N0 |
| ANISOU 5645 | N GLU B 163   | 6880    | 5800    | 5850   | -1270 | 970   | -30  | N0 |
| ATOM 5646   | CA GLU B 163  | -57.162 | -20.938 | 31.454 | 1.00  | 49.53 |      | C0 |
| ANISOU 5646 | CA GLU B 163  | 7130    | 5740    | 5950   | -1360 | 940   | -80  | C0 |
| ATOM 5647   | C GLU B 163   | -55.674 | -21.027 | 31.081 | 1.00  | 46.53 |      | C0 |
| ANISOU 5647 | C GLU B 163   | 6880    | 5290    | 5510   | -1140 | 880   | -100 | C0 |
| ATOM 5648   | O GLU B 163   | -55.129 | -22.140 | 31.080 | 1.00  | 46.85 |      | O0 |
| ANISOU 5648 | O GLU B 163   | 7160    | 5140    | 5510   | -1110 | 930   | -90  | O0 |
| ATOM 5649   | CB GLU B 163  | -58.018 | -20.674 | 30.209 | 1.00  | 51.37 |      | C0 |
| ANISOU 5649 | CB GLU B 163  | 7210    | 6060    | 6250   | -1520 | 860   | -180 | C0 |
| ATOM 5650   | CG GLU B 163  | -58.051 | -21.829 | 29.219 | 1.00  | 54.39 |      | C0 |
| ANISOU 5650 | CG GLU B 163  | 7760    | 6280    | 6630   | -1660 | 830   | -250 | C0 |
| ATOM 5651   | CD GLU B 163  | -58.886 | -21.595 | 27.967 | 1.00  | 55.72 |      | C0 |
| ANISOU 5651 | CD GLU B 163  | 7780    | 6550    | 6840   | -1820 | 730   | -350 | C0 |
| ATOM 5652   | OE1 GLU B 163 | -59.256 | -20.429 | 27.702 | 1.00  | 56.33 |      | O0 |
| ANISOU 5652 | OE1 GLU B 163 | 7620    | 6840    | 6950   | -1780 | 660   | -360 | O0 |
| ATOM 5653   | OE2 GLU B 163 | -59.159 | -22.580 | 27.254 | 1.00  | 58.04 |      | O0 |
| ANISOU 5653 | OE2 GLU B 163 | 8220    | 6700    | 7130   | -1980 | 710   | -420 | O0 |
| ATOM 5654   | H GLU B 163   | -58.077 | -19.319 | 32.265 | 1.00  | 48.86 |      | H0 |
| ANISOU 5654 | H GLU B 163   | 6730    | 5930    | 5900   | -1340 | 950   | -40  | H0 |
| ATOM 5655   | HA GLU B 163  | -57.440 | -21.793 | 31.856 | 1.00  | 50.79 |      | H0 |
| ANISOU 5655 | HA GLU B 163  | 7420    | 5770    | 6100   | -1450 | 1020  | -50  | H0 |
| ATOM 5656   | HB2 GLU B 163 | -58.933 | -20.482 | 30.496 | 1.00  | 51.94 |      | H0 |
| ANISOU 5656 | HB2 GLU B 163 | 7160    | 6220    | 6360   | -1640 | 890   | -160 | H0 |
| ATOM 5657   | HB3 GLU B 163 | -57.672 | -19.876 | 29.756 | 1.00  | 50.10 |      | H0 |
| ANISOU 5657 | HB3 GLU B 163 | 6950    | 6010    | 6080   | -1430 | 780   | -210 | H0 |
| ATOM 5658   | HG2 GLU B 163 | -57.133 | -22.033 | 28.940 | 1.00  | 53.74 |      | H0 |
| ANISOU 5658 | HG2 GLU B 163 | 7800    | 6120    | 6500   | -1530 | 810   | -260 | H0 |
| ATOM 5659   | HG3 GLU B 163 | -58.401 | -22.624 | 29.675 | 1.00  | 55.58 |      | H0 |
| ANISOU 5659 | HG3 GLU B 163 | 8030    | 6310    | 6780   | -1770 | 910   | -220 | H0 |
| ATOM 5660   | N TYR B 164   | -55.046 | -19.883 | 30.801 | 1.00  | 42.91 |      | N0 |
| ANISOU 5660 | N TYR B 164   | 6280    | 4980    | 5050   | -1000 | 800   | -120 | N0 |
| ATOM 5661   | CA TYR B 164  | -53.652 | -19.769 | 30.310 | 1.00  | 41.59 |      | C0 |
| ANISOU 5661 | CA TYR B 164  | 6170    | 4800    | 4830   | -800  | 740   | -130 | C0 |
| ATOM 5662   | C TYR B 164   | -52.778 | -19.006 | 31.313 | 1.00  | 39.43 |      | C0 |
| ANISOU 5662 | C TYR B 164   | 5850    | 4610    | 4520   | -620  | 730   | -70  | C0 |
| ATOM 5663   | O TYR B 164   | -51.663 | -18.602 | 30.939 | 1.00  | 37.81 |      | O0 |
| ANISOU 5663 | O TYR B 164   | 5620    | 4460    | 4290   | -470  | 670   | -80  | O0 |
| ATOM 5664   | CB TYR B 164  | -53.656 | -19.074 | 28.950 | 1.00  | 40.81 |      | C0 |
| ANISOU 5664 | CB TYR B 164  | 5940    | 4810    | 4760   | -820  | 650   | -220 | C0 |
| ATOM 5665   | CG TYR B 164  | -54.426 | -19.817 | 27.892 | 1.00  | 42.20 |      | C0 |
| ANISOU 5665 | CG TYR B 164  | 6170    | 4910    | 4960   | -990  | 630   | -290 | C0 |
| ATOM 5666   | CD1 TYR B 164 | -54.055 | -21.094 | 27.512 | 1.00  | 44.25 |      | C0 |
| ANISOU 5666 | CD1 TYR B 164 | 6670    | 4970    | 5180   | -1000 | 670   | -320 | C0 |
| ATOM 5667   | CD2 TYR B 164 | -55.528 | -19.251 | 27.278 | 1.00  | 42.47 |      | C0 |

|             |               |         |         |        |       |       |      |    |
|-------------|---------------|---------|---------|--------|-------|-------|------|----|
| ANISOU 5667 | CD2 TYR B 164 | 6040    | 5060    | 5040   | -1140 | 580   | -340 | C0 |
| ATOM 5668   | CE1 TYR B 164 | -54.755 | -21.790 | 26.539 | 1.00  | 46.31 |      | C0 |
| ANISOU 5668 | CE1 TYR B 164 | 7000    | 5150    | 5450   | -1170 | 650   | -400 | C0 |
| ATOM 5669   | CE2 TYR B 164 | -56.240 | -19.930 | 26.303 | 1.00  | 44.58 |      | C0 |
| ANISOU 5669 | CE2 TYR B 164 | 6350    | 5270    | 5320   | -1320 | 550   | -420 | C0 |
| ATOM 5670   | CZ TYR B 164  | -55.848 | -21.201 | 25.926 | 1.00  | 45.95 |      | C0 |
| ANISOU 5670 | CZ TYR B 164  | 6770    | 5240    | 5450   | -1340 | 580   | -460 | C0 |
| ATOM 5671   | OH TYR B 164  | -56.542 | -21.872 | 24.967 | 1.00  | 47.87 |      | O0 |
| ANISOU 5671 | OH TYR B 164  | 7080    | 5410    | 5690   | -1530 | 530   | -550 | O0 |
| ATOM 5672   | H TYR B 164   | -55.445 | -19.069 | 30.890 | 1.00  | 42.59 |      | H0 |
| ANISOU 5672 | H TYR B 164   | 6090    | 5060    | 5030   | -1010 | 780   | -120 | H0 |
| ATOM 5673   | HA TYR B 164  | -53.277 | -20.680 | 30.200 | 1.00  | 42.34 |      | H0 |
| ANISOU 5673 | HA TYR B 164  | 6430    | 4760    | 4900   | -780  | 770   | -130 | H0 |
| ATOM 5674   | HB2 TYR B 164 | -54.042 | -18.180 | 29.058 | 1.00  | 40.11 |      | H0 |
| ANISOU 5674 | HB2 TYR B 164 | 5700    | 4840    | 4700   | -840  | 620   | -220 | H0 |
| ATOM 5675   | HB3 TYR B 164 | -52.729 | -18.967 | 28.650 | 1.00  | 40.36 |      | H0 |
| ANISOU 5675 | HB3 TYR B 164 | 5910    | 4750    | 4670   | -690  | 620   | -220 | H0 |
| ATOM 5676   | HD1 TYR B 164 | -53.308 | -21.498 | 27.920 | 1.00  | 44.41 |      | H0 |
| ANISOU 5676 | HD1 TYR B 164 | 6800    | 4910    | 5160   | -880  | 710   | -280 | H0 |
| ATOM 5677   | HD2 TYR B 164 | -55.798 | -18.384 | 27.525 | 1.00  | 41.89 |      | H0 |
| ANISOU 5677 | HD2 TYR B 164 | 5820    | 5110    | 4990   | -1130 | 560   | -330 | H0 |
| ATOM 5678   | HE1 TYR B 164 | -54.481 | -22.655 | 26.286 | 1.00  | 47.00 |      | H0 |
| ANISOU 5678 | HE1 TYR B 164 | 7270    | 5090    | 5500   | -1170 | 670   | -430 | H0 |
| ATOM 5679   | HE2 TYR B 164 | -56.985 | -19.525 | 25.890 | 1.00  | 44.48 |      | H0 |
| ANISOU 5679 | HE2 TYR B 164 | 6210    | 5360    | 5340   | -1410 | 500   | -450 | H0 |
| ATOM 5680   | N PHE B 165   | -53.252 | -18.820 | 32.548 | 1.00  | 39.11 |      | N0 |
| ANISOU 5680 | N PHE B 165   | 5800    | 4600    | 4460   | -630  | 790   | 0    | N0 |
| ATOM 5681   | CA PHE B 165  | -52.497 | -18.095 | 33.602 | 1.00  | 37.53 |      | C0 |
| ANISOU 5681 | CA PHE B 165  | 5570    | 4480    | 4210   | -470  | 760   | 50   | C0 |
| ATOM 5682   | C PHE B 165   | -51.438 | -19.029 | 34.195 | 1.00  | 37.63 |      | C0 |
| ANISOU 5682 | C PHE B 165   | 5780    | 4370    | 4150   | -330  | 790   | 110  | C0 |
| ATOM 5683   | O PHE B 165   | -51.761 | -20.188 | 34.517 | 1.00  | 38.15 |      | O0 |
| ANISOU 5683 | O PHE B 165   | 6020    | 4280    | 4190   | -370  | 870   | 150  | O0 |
| ATOM 5684   | CB PHE B 165  | -53.426 | -17.537 | 34.679 | 1.00  | 37.91 |      | C0 |
| ANISOU 5684 | CB PHE B 165  | 5560    | 4590    | 4250   | -530  | 820   | 90   | C0 |
| ATOM 5685   | CG PHE B 165  | -52.729 | -16.571 | 35.601 | 1.00  | 36.98 |      | C0 |
| ANISOU 5685 | CG PHE B 165  | 5400    | 4570    | 4070   | -380  | 770   | 120  | C0 |
| ATOM 5686   | CD1 PHE B 165 | -52.302 | -15.342 | 35.132 | 1.00  | 35.76 |      | C0 |
| ANISOU 5686 | CD1 PHE B 165 | 5100    | 4540    | 3940   | -330  | 670   | 70   | C0 |
| ATOM 5687   | CD2 PHE B 165 | -52.449 | -16.913 | 36.914 | 1.00  | 38.01 |      | C0 |
| ANISOU 5687 | CD2 PHE B 165 | 5660    | 4660    | 4120   | -300  | 820   | 190  | C0 |
| ATOM 5688   | CE1 PHE B 165 | -51.634 | -14.460 | 35.966 | 1.00  | 35.86 |      | C0 |
| ANISOU 5688 | CE1 PHE B 165 | 5100    | 4630    | 3900   | -220  | 610   | 80   | C0 |
| ATOM 5689   | CE2 PHE B 165 | -51.787 | -16.027 | 37.750 | 1.00  | 37.58 |      | C0 |
| ANISOU 5689 | CE2 PHE B 165 | 5580    | 4700    | 3990   | -170  | 750   | 200  | C0 |
| ATOM 5690   | CZ PHE B 165  | -51.379 | -14.802 | 37.275 | 1.00  | 36.39 |      | C0 |
| ANISOU 5690 | CZ PHE B 165  | 5290    | 4670    | 3870   | -140  | 650   | 150  | C0 |
| ATOM 5691   | H PHE B 165   | -54.055 | -19.129 | 32.838 | 1.00  | 39.78 |      | H0 |
| ANISOU 5691 | H PHE B 165   | 5900    | 4650    | 4570   | -740  | 840   | 10   | H0 |
| ATOM 5692   | HA PHE B 165  | -52.030 | -17.333 | 33.175 | 1.00  | 36.63 |      | H0 |
| ANISOU 5692 | HA PHE B 165  | 5360    | 4450    | 4110   | -420  | 690   | 20   | H0 |
| ATOM 5693   | HB2 PHE B 165 | -54.175 | -17.081 | 34.242 | 1.00  | 37.57 |      | H0 |
| ANISOU 5693 | HB2 PHE B 165 | 5400    | 4620    | 4260   | -620  | 810   | 50   | H0 |
| ATOM 5694   | HB3 PHE B 165 | -53.787 | -18.282 | 35.203 | 1.00  | 38.86 |      | H0 |



|                           |         |         |        |      |       |     |    |
|---------------------------|---------|---------|--------|------|-------|-----|----|
| ANISOU 5694 HB3 PHE B 165 | 5780    | 4630    | 4350   | -580 | 900   | 130 | H0 |
| ATOM 5695 HD1 PHE B 165   | -52.473 | -15.100 | 34.235 | 1.00 | 35.40 |     | H0 |
| ANISOU 5695 HD1 PHE B 165 | 4980    | 4520    | 3950   | -380 | 640   | 20  | H0 |
| ATOM 5696 HD2 PHE B 165   | -52.727 | -17.752 | 37.246 | 1.00 | 38.96 |     | H0 |
| ANISOU 5696 HD2 PHE B 165 | 5890    | 4690    | 4220   | -330 | 890   | 230 | H0 |
| ATOM 5697 HE1 PHE B 165   | -51.362 | -13.619 | 35.638 | 1.00 | 34.92 |     | H0 |
| ANISOU 5697 HE1 PHE B 165 | 4890    | 4580    | 3800   | -210 | 550   | 50  | H0 |
| ATOM 5698 HE2 PHE B 165   | -51.615 | -16.267 | 38.644 | 1.00 | 38.23 |     | H0 |
| ANISOU 5698 HE2 PHE B 165 | 5760    | 4760    | 4010   | -110 | 780   | 250 | H0 |
| ATOM 5699 HZ PHE B 165    | -50.929 | -14.198 | 37.844 | 1.00 | 36.28 |     | H0 |
| ANISOU 5699 HZ PHE B 165  | 5260    | 4710    | 3810   | -70  | 600   | 150 | H0 |
| ATOM 5700 N SER B 166     | -50.206 | -18.530 | 34.321 | 1.00 | 36.41 |     | N0 |
| ANISOU 5700 N SER B 166   | 5580    | 4300    | 3950   | -150 | 710   | 120 | N0 |
| ATOM 5701 CA SER B 166    | -49.029 | -19.279 | 34.836 | 1.00 | 37.16 |     | C0 |
| ANISOU 5701 CA SER B 166  | 5820    | 4330    | 3970   | 30   | 710   | 180 | C0 |
| ATOM 5702 C SER B 166     | -49.289 | -19.741 | 36.274 | 1.00 | 37.87 |     | C0 |
| ANISOU 5702 C SER B 166   | 6050    | 4350    | 3990   | 70   | 770   | 270 | C0 |
| ATOM 5703 O SER B 166     | -49.651 | -18.898 | 37.097 | 1.00 | 37.21 |     | O0 |
| ANISOU 5703 O SER B 166   | 5890    | 4370    | 3880   | 40   | 760   | 280 | O0 |
| ATOM 5704 CB SER B 166    | -47.769 | -18.447 | 34.758 | 1.00 | 36.12 |     | C0 |
| ANISOU 5704 CB SER B 166  | 5560    | 4340    | 3830   | 180  | 600   | 180 | C0 |
| ATOM 5705 OG SER B 166    | -46.692 | -19.108 | 35.413 | 1.00 | 36.65 |     | O0 |
| ANISOU 5705 OG SER B 166  | 5730    | 4380    | 3810   | 370  | 590   | 250 | O0 |
| ATOM 5706 H SER B 166     | -49.996 | -17.672 | 34.095 | 1.00 | 35.62 |     | H0 |
| ANISOU 5706 H SER B 166   | 5360    | 4300    | 3870   | -140 | 650   | 100 | H0 |
| ATOM 5707 HA SER B 166    | -48.908 | -20.085 | 34.267 | 1.00 | 37.72 |     | H0 |
| ANISOU 5707 HA SER B 166  | 5990    | 4290    | 4050   | 40   | 740   | 180 | H0 |
| ATOM 5708 HB2 SER B 166   | -47.536 | -18.293 | 33.815 | 1.00 | 35.60 |     | H0 |
| ANISOU 5708 HB2 SER B 166 | 5420    | 4300    | 3800   | 170  | 570   | 140 | H0 |
| ATOM 5709 HB3 SER B 166   | -47.926 | -17.573 | 35.183 | 1.00 | 35.42 |     | H0 |
| ANISOU 5709 HB3 SER B 166 | 5370    | 4350    | 3740   | 160  | 560   | 180 | H0 |
| ATOM 5710 N GLN B 167     | -49.088 | -21.031 | 36.552 | 1.00 | 39.63 |     | N0 |
| ANISOU 5710 N GLN B 167   | 6500    | 4400    | 4160   | 130  | 840   | 330 | N0 |
| ATOM 5711 CA GLN B 167    | -49.138 | -21.618 | 37.918 | 1.00 | 41.74 |     | C0 |
| ANISOU 5711 CA GLN B 167  | 6940    | 4590    | 4330   | 190  | 910   | 430 | C0 |
| ATOM 5712 C GLN B 167     | -47.925 | -21.150 | 38.737 | 1.00 | 41.20 |     | C0 |
| ANISOU 5712 C GLN B 167   | 6840    | 4640    | 4170   | 420  | 810   | 480 | C0 |
| ATOM 5713 O GLN B 167     | -47.917 | -21.399 | 39.953 | 1.00 | 41.66 |     | O0 |
| ANISOU 5713 O GLN B 167   | 7030    | 4680    | 4120   | 490  | 850   | 560 | O0 |
| ATOM 5714 CB GLN B 167    | -49.175 | -23.147 | 37.847 | 1.00 | 44.16 |     | C0 |
| ANISOU 5714 CB GLN B 167  | 7520    | 4660    | 4600   | 210  | 1010  | 480 | C0 |
| ATOM 5715 CG GLN B 167    | -47.919 | -23.768 | 37.242 | 1.00 | 45.43 |     | C0 |
| ANISOU 5715 CG GLN B 167  | 7760    | 4770    | 4730   | 410  | 970   | 480 | C0 |
| ATOM 5716 CD GLN B 167    | -48.011 | -25.270 | 37.139 | 1.00 | 47.82 |     | C0 |
| ANISOU 5716 CD GLN B 167  | 8370    | 4810    | 5000   | 430  | 1070  | 530 | C0 |
| ATOM 5717 OE1 GLN B 167   | -47.895 | -25.842 | 36.062 | 1.00 | 49.05 |     | O0 |
| ANISOU 5717 OE1 GLN B 167 | 8590    | 4850    | 5190   | 410  | 1080  | 470 | O0 |
| ATOM 5718 NE2 GLN B 167   | -48.230 | -25.922 | 38.268 | 1.00 | 49.87 |     | N0 |
| ANISOU 5718 NE2 GLN B 167 | 8830    | 4940    | 5180   | 460  | 1150  | 630 | N0 |
| ATOM 5719 H GLN B 167     | -48.919 | -21.641 | 35.899 | 1.00 | 40.17 |     | H0 |
| ANISOU 5719 H GLN B 167   | 6630    | 4390    | 4240   | 130  | 860   | 310 | H0 |
| ATOM 5720 HA GLN B 167    | -49.958 | -21.301 | 38.361 | 1.00 | 41.54 |     | H0 |
| ANISOU 5720 HA GLN B 167  | 6880    | 4590    | 4310   | 80   | 960   | 440 | H0 |
| ATOM 5721 HB2 GLN B 167   | -49.298 | -23.496 | 38.754 | 1.00 | 45.15 |     | H0 |

|                            |         |         |        |      |       |     |    |
|----------------------------|---------|---------|--------|------|-------|-----|----|
| ANISOU 5721 HB2 GLN B 167  | 7760    | 4730    | 4660   | 240  | 1070  | 560 | H0 |
| ATOM 5722 HB3 GLN B 167    | -49.952 | -23.415 | 37.315 | 1.00 | 44.34 |     | H0 |
| ANISOU 5722 HB3 GLN B 167  | 7550    | 4610    | 4680   | 50   | 1060  | 440 | H0 |
| ATOM 5723 HG2 GLN B 167    | -47.771 | -23.396 | 36.348 | 1.00 | 44.47 |     | H0 |
| ANISOU 5723 HG2 GLN B 167  | 7520    | 4710    | 4670   | 390  | 920   | 410 | H0 |
| ATOM 5724 HG3 GLN B 167    | -47.145 | -23.535 | 37.795 | 1.00 | 45.38 |     | H0 |
| ANISOU 5724 HG3 GLN B 167  | 7730    | 4840    | 4670   | 570  | 910   | 530 | H0 |
| ATOM 5725 HE21 GLN B 167   | -48.641 | -26.705 | 38.254 | 1.00 | 50.87 |     | H0 |
| ANISOU 5725 HE21 GLN B 167 | 9130    | 4900    | 5300   | 390  | 1230  | 650 | H0 |
| ATOM 5726 HE22 GLN B 167   | -47.964 | -25.577 | 39.038 | 1.00 | 49.64 |     | H0 |
| ANISOU 5726 HE22 GLN B 167 | 8770    | 5000    | 5090   | 550  | 1130  | 680 | H0 |
| ATOM 5727 N TYR B 168      | -46.940 | -20.506 | 38.100 | 1.00 | 39.77 |     | N0 |
| ANISOU 5727 N TYR B 168    | 6500    | 4600    | 4010   | 510  | 700   | 430 | N0 |
| ATOM 5728 CA TYR B 168     | -45.627 | -20.170 | 38.709 | 1.00 | 40.16 |     | C0 |
| ANISOU 5728 CA TYR B 168   | 6500    | 4770    | 3990   | 720  | 590   | 470 | C0 |
| ATOM 5729 C TYR B 168      | -45.590 | -18.707 | 39.169 | 1.00 | 38.59 |     | C0 |
| ANISOU 5729 C TYR B 168    | 6110    | 4760    | 3790   | 670  | 490   | 430 | C0 |
| ATOM 5730 O TYR B 168      | -44.681 | -18.377 | 39.946 | 1.00 | 39.31 |     | O0 |
| ANISOU 5730 O TYR B 168    | 6170    | 4960    | 3800   | 810  | 390   | 470 | O0 |
| ATOM 5731 CB TYR B 168     | -44.497 | -20.536 | 37.742 | 1.00 | 40.27 |     | C0 |
| ANISOU 5731 CB TYR B 168   | 6460    | 4810    | 4030   | 860  | 540   | 460 | C0 |
| ATOM 5732 CG TYR B 168     | -44.482 | -22.001 | 37.390 | 1.00 | 41.42 |     | C0 |
| ANISOU 5732 CG TYR B 168   | 6840    | 4750    | 4150   | 930  | 640   | 500 | C0 |
| ATOM 5733 CD1 TYR B 168    | -44.395 | -22.965 | 38.381 | 1.00 | 42.92 |     | C0 |
| ANISOU 5733 CD1 TYR B 168  | 7260    | 4810    | 4240   | 1050 | 700   | 600 | C0 |
| ATOM 5734 CD2 TYR B 168    | -44.596 | -22.427 | 36.075 | 1.00 | 41.06 |     | C0 |
| ANISOU 5734 CD2 TYR B 168  | 6810    | 4620    | 4170   | 880  | 690   | 430 | C0 |
| ATOM 5735 CE1 TYR B 168    | -44.403 | -24.316 | 38.074 | 1.00 | 44.55 |     | C0 |
| ANISOU 5735 CE1 TYR B 168  | 7710    | 4800    | 4420   | 1120 | 800   | 630 | C0 |
| ATOM 5736 CE2 TYR B 168    | -44.600 | -23.775 | 35.750 | 1.00 | 42.59 |     | C0 |
| ANISOU 5736 CE2 TYR B 168  | 7250    | 4600    | 4340   | 950  | 780   | 460 | C0 |
| ATOM 5737 CZ TYR B 168     | -44.514 | -24.723 | 36.757 | 1.00 | 44.27 |     | C0 |
| ANISOU 5737 CZ TYR B 168   | 7700    | 4670    | 4450   | 1070 | 840   | 560 | C0 |
| ATOM 5738 OH TYR B 168     | -44.513 | -26.054 | 36.456 | 1.00 | 46.03 |     | O0 |
| ANISOU 5738 OH TYR B 168   | 8200    | 4650    | 4640   | 1130 | 930   | 580 | O0 |
| ATOM 5739 H TYR B 168      | -46.992 | -20.242 | 37.233 | 1.00 | 39.15 |     | H0 |
| ANISOU 5739 H TYR B 168    | 6330    | 4550    | 4000   | 450  | 680   | 370 | H0 |
| ATOM 5740 HA TYR B 168     | -45.520 | -20.731 | 39.518 | 1.00 | 41.15 |     | H0 |
| ANISOU 5740 HA TYR B 168   | 6760    | 4840    | 4030   | 800  | 610   | 540 | H0 |
| ATOM 5741 HB2 TYR B 168    | -44.599 | -20.008 | 36.923 | 1.00 | 39.21 |     | H0 |
| ANISOU 5741 HB2 TYR B 168  | 6200    | 4730    | 3970   | 770  | 520   | 400 | H0 |
| ATOM 5742 HB3 TYR B 168    | -43.640 | -20.296 | 38.154 | 1.00 | 40.56 |     | H0 |
| ANISOU 5742 HB3 TYR B 168  | 6440    | 4950    | 4020   | 990  | 460   | 490 | H0 |
| ATOM 5743 HD1 TYR B 168    | -44.327 | -22.697 | 39.282 | 1.00 | 43.23 |     | H0 |
| ANISOU 5743 HD1 TYR B 168  | 7300    | 4910    | 4210   | 1090 | 670   | 640 | H0 |
| ATOM 5744 HD2 TYR B 168    | -44.663 | -21.787 | 35.385 | 1.00 | 40.04 |     | H0 |
| ANISOU 5744 HD2 TYR B 168  | 6530    | 4580    | 4110   | 810  | 650   | 370 | H0 |
| ATOM 5745 HE1 TYR B 168    | -44.337 | -24.957 | 38.762 | 1.00 | 45.78 |     | H0 |
| ANISOU 5745 HE1 TYR B 168  | 8040    | 4860    | 4500   | 1210 | 840   | 700 | H0 |
| ATOM 5746 HE2 TYR B 168    | -44.674 | -24.046 | 34.850 | 1.00 | 42.56 |     | H0 |
| ANISOU 5746 HE2 TYR B 168  | 7260    | 4540    | 4370   | 910  | 810   | 410 | H0 |
| ATOM 5747 N SER B 169      | -46.534 | -17.871 | 38.725 | 1.00 | 36.76 |     | N0 |
| ANISOU 5747 N SER B 169    | 5770    | 4560    | 3640   | 490  | 500   | 360 | N0 |
| ATOM 5748 CA SER B 169     | -46.797 | -16.527 | 39.302 | 1.00 | 35.73 |     | C0 |

|                           |         |         |        |      |       |     |    |
|---------------------------|---------|---------|--------|------|-------|-----|----|
| ANISOU 5748 CA SER B 169  | 5520    | 4560    | 3500   | 440  | 440   | 330 | C0 |
| ATOM 5749 C SER B 169     | -46.897 | -16.640 | 40.830 | 1.00 | 37.53 |     | C0 |
| ANISOU 5749 C SER B 169   | 5880    | 4780    | 3590   | 510  | 450   | 390 | C0 |
| ATOM 5750 O SER B 169     | -47.329 | -17.694 | 41.317 | 1.00 | 38.46 |     | O0 |
| ANISOU 5750 O SER B 169   | 6180    | 4770    | 3660   | 530  | 560   | 460 | O0 |
| ATOM 5751 CB SER B 169    | -48.050 | -15.933 | 38.728 | 1.00 | 34.12 |     | C0 |
| ANISOU 5751 CB SER B 169  | 5230    | 4350    | 3380   | 260  | 500   | 270 | C0 |
| ATOM 5752 OG SER B 169    | -48.236 | -14.600 | 39.181 | 1.00 | 32.78 |     | O0 |
| ANISOU 5752 OG SER B 169  | 4960    | 4300    | 3200   | 230  | 440   | 230 | O0 |
| ATOM 5753 H SER B 169     | -47.080 | -18.060 | 38.022 | 1.00 | 36.49 |     | H0 |
| ANISOU 5753 H SER B 169   | 5720    | 4480    | 3670   | 400  | 550   | 330 | H0 |
| ATOM 5754 HA SER B 169    | -46.029 | -15.935 | 39.078 | 1.00 | 35.40 |     | H0 |
| ANISOU 5754 HA SER B 169  | 5370    | 4620    | 3460   | 480  | 340   | 300 | H0 |
| ATOM 5755 HB2 SER B 169   | -47.998 | -15.942 | 37.747 | 1.00 | 33.55 |     | H0 |
| ANISOU 5755 HB2 SER B 169 | 5090    | 4280    | 3380   | 220  | 490   | 230 | H0 |
| ATOM 5756 HB3 SER B 169   | -48.822 | -16.480 | 38.998 | 1.00 | 34.63 |     | H0 |
| ANISOU 5756 HB3 SER B 169 | 5380    | 4340    | 3430   | 200  | 590   | 290 | H0 |
| ATOM 5757 N ARG B 170     | -46.507 | -15.594 | 41.559 | 1.00 | 38.43 |     | N0 |
| ANISOU 5757 N ARG B 170   | 5940    | 5020    | 3650   | 540  | 350   | 370 | N0 |
| ATOM 5758 CA ARG B 170    | -46.738 | -15.490 | 43.026 | 1.00 | 40.17 |     | C0 |
| ANISOU 5758 CA ARG B 170  | 6290    | 5250    | 3720   | 600  | 360   | 420 | C0 |
| ATOM 5759 C ARG B 170     | -48.213 | -15.165 | 43.266 | 1.00 | 39.21 |     | C0 |
| ANISOU 5759 C ARG B 170   | 6200    | 5080    | 3620   | 470  | 490   | 400 | C0 |
| ATOM 5760 O ARG B 170     | -48.647 | -15.259 | 44.422 | 1.00 | 39.97 |     | O0 |
| ANISOU 5760 O ARG B 170   | 6430    | 5160    | 3600   | 510  | 550   | 450 | O0 |
| ATOM 5761 CB ARG B 170    | -45.855 | -14.414 | 43.661 | 1.00 | 41.31 |     | C0 |
| ANISOU 5761 CB ARG B 170  | 6370    | 5540    | 3790   | 660  | 190   | 380 | C0 |
| ATOM 5762 CG ARG B 170    | -44.377 | -14.764 | 43.707 | 1.00 | 43.62 |     | C0 |
| ANISOU 5762 CG ARG B 170  | 6620    | 5900    | 4040   | 810  | 60    | 420 | C0 |
| ATOM 5763 CD ARG B 170    | -43.558 | -13.524 | 44.005 | 1.00 | 45.16 |     | C0 |
| ANISOU 5763 CD ARG B 170  | 6690    | 6260    | 4210   | 800  | -120  | 350 | C0 |
| ATOM 5764 NE ARG B 170    | -43.603 | -13.179 | 45.420 | 1.00 | 47.98 |     | N0 |
| ANISOU 5764 NE ARG B 170  | 7180    | 6640    | 4400   | 860  | -170  | 360 | N0 |
| ATOM 5765 CZ ARG B 170    | -43.579 | -11.942 | 45.917 | 1.00 | 49.08 |     | C0 |
| ANISOU 5765 CZ ARG B 170  | 7290    | 6860    | 4500   | 800  | -270  | 290 | C0 |
| ATOM 5766 NH1 ARG B 170   | -43.537 | -10.889 | 45.113 | 1.00 | 48.55 |     | N0 |
| ANISOU 5766 NH1 ARG B 170 | 7070    | 6830    | 4540   | 670  | -330  | 200 | N0 |
| ATOM 5767 NH2 ARG B 170   | -43.610 | -11.764 | 47.227 | 1.00 | 50.47 |     | N0 |
| ANISOU 5767 NH2 ARG B 170 | 7620    | 7050    | 4500   | 860  | -320  | 300 | N0 |
| ATOM 5768 H ARG B 170     | -46.075 | -14.877 | 41.198 | 1.00 | 37.72 |     | H0 |
| ANISOU 5768 H ARG B 170   | 5730    | 5010    | 3590   | 530  | 270   | 330 | H0 |
| ATOM 5769 HA ARG B 170    | -46.531 | -16.360 | 43.439 | 1.00 | 41.11 |     | H0 |
| ANISOU 5769 HA ARG B 170  | 6540    | 5300    | 3780   | 680  | 400   | 480 | H0 |
| ATOM 5770 HB2 ARG B 170   | -45.968 | -13.582 | 43.156 | 1.00 | 40.48 |     | H0 |
| ANISOU 5770 HB2 ARG B 170 | 6140    | 5480    | 3760   | 580  | 160   | 320 | H0 |
| ATOM 5771 HB3 ARG B 170   | -46.168 | -14.254 | 44.576 | 1.00 | 42.04 |     | H0 |
| ANISOU 5771 HB3 ARG B 170 | 6560    | 5630    | 3790   | 690  | 210   | 400 | H0 |
| ATOM 5772 HG2 ARG B 170   | -44.217 | -15.437 | 44.402 | 1.00 | 44.75 |     | H0 |
| ANISOU 5772 HG2 ARG B 170 | 6890    | 6010    | 4090   | 910  | 70    | 480 | H0 |
| ATOM 5773 HG3 ARG B 170   | -44.099 | -15.139 | 42.844 | 1.00 | 43.23 |     | H0 |
| ANISOU 5773 HG3 ARG B 170 | 6510    | 5840    | 4080   | 810  | 70    | 410 | H0 |
| ATOM 5774 HD2 ARG B 170   | -42.626 | -13.680 | 43.741 | 1.00 | 45.53 |     | H0 |
| ANISOU 5774 HD2 ARG B 170 | 6660    | 6370    | 4270   | 870  | -200  | 370 | H0 |
| ATOM 5775 HD3 ARG B 170   | -43.901 | -12.777 | 43.472 | 1.00 | 44.16 |     | H0 |

|                            |         |         |        |      |       |     |    |
|----------------------------|---------|---------|--------|------|-------|-----|----|
| ANISOU 5775 HD3 ARG B 170  | 6470    | 6140    | 4160   | 690  | -120  | 290 | H0 |
| ATOM 5776 HE ARG B 170     | -43.625 | -13.838 | 45.992 | 1.00 | 48.79 |     | H0 |
| ANISOU 5776 HE ARG B 170   | 7400    | 6710    | 4430   | 940  | -140  | 420 | H0 |
| ATOM 5777 HH11 ARG B 170   | -43.512 | -10.994 | 44.244 | 1.00 | 47.46 |     | H0 |
| ANISOU 5777 HH11 ARG B 170 | 6840    | 6680    | 4510   | 630  | -300  | 200 | H0 |
| ATOM 5778 HH12 ARG B 170   | -43.526 | -10.080 | 45.456 | 1.00 | 48.38 |     | H0 |
| ANISOU 5778 HH12 ARG B 170 | 7050    | 6840    | 4490   | 630  | -390  | 150 | H0 |
| ATOM 5779 HH21 ARG B 170   | -43.643 | -12.461 | 47.765 | 1.00 | 51.23 |     | H0 |
| ANISOU 5779 HH21 ARG B 170 | 7830    | 7120    | 4510   | 950  | -280  | 360 | H0 |
| ATOM 5780 HH22 ARG B 170   | -43.604 | -10.949 | 47.561 | 1.00 | 50.48 |     | H0 |
| ANISOU 5780 HH22 ARG B 170 | 7620    | 7100    | 4460   | 820  | -380  | 240 | H0 |
| ATOM 5781 N PHE B 171      | -48.943 | -14.800 | 42.208 | 1.00 | 37.25 |     | N0 |
| ANISOU 5781 N PHE B 171    | 5820    | 4830    | 3500   | 330  | 540   | 340 | N0 |
| ATOM 5782 CA PHE B 171     | -50.347 | -14.329 | 42.273 | 1.00 | 37.12 |     | C0 |
| ANISOU 5782 CA PHE B 171   | 5760    | 4820    | 3520   | 210  | 650   | 320 | C0 |
| ATOM 5783 C PHE B 171      | -51.274 | -15.348 | 41.604 | 1.00 | 37.62 |     | C0 |
| ANISOU 5783 C PHE B 171    | 5840    | 4780    | 3670   | 90   | 780   | 340 | C0 |
| ATOM 5784 O PHE B 171      | -50.816 | -16.210 | 40.814 | 1.00 | 37.36 |     | O0 |
| ANISOU 5784 O PHE B 171    | 5840    | 4670    | 3690   | 90   | 770   | 350 | O0 |
| ATOM 5785 CB PHE B 171     | -50.443 | -12.932 | 41.658 | 1.00 | 35.83 |     | C0 |
| ANISOU 5785 CB PHE B 171   | 5430    | 4750    | 3430   | 160  | 560   | 230 | C0 |
| ATOM 5786 CG PHE B 171     | -49.477 | -11.964 | 42.287 | 1.00 | 36.21 |     | C0 |
| ANISOU 5786 CG PHE B 171   | 5480    | 4880    | 3400   | 250  | 420   | 190 | C0 |
| ATOM 5787 CD1 PHE B 171    | -49.824 | -11.263 | 43.433 | 1.00 | 36.99 |     | C0 |
| ANISOU 5787 CD1 PHE B 171  | 5660    | 5010    | 3380   | 290  | 430   | 190 | C0 |
| ATOM 5788 CD2 PHE B 171    | -48.191 | -11.818 | 41.783 | 1.00 | 36.16 |     | C0 |
| ANISOU 5788 CD2 PHE B 171  | 5400    | 4920    | 3410   | 290  | 280   | 180 | C0 |
| ATOM 5789 CE1 PHE B 171    | -48.917 | -10.409 | 44.040 | 1.00 | 37.74 |     | C0 |
| ANISOU 5789 CE1 PHE B 171  | 5780    | 5170    | 3390   | 350  | 290   | 150 | C0 |
| ATOM 5790 CE2 PHE B 171    | -47.286 | -10.963 | 42.390 | 1.00 | 36.79 |     | C0 |
| ANISOU 5790 CE2 PHE B 171  | 5480    | 5080    | 3420   | 350  | 140   | 150 | C0 |
| ATOM 5791 CZ PHE B 171     | -47.651 | -10.256 | 43.516 | 1.00 | 37.55 |     | C0 |
| ANISOU 5791 CZ PHE B 171   | 5670    | 5200    | 3400   | 370  | 130   | 130 | C0 |
| ATOM 5792 H PHE B 171      | -48.623 | -14.795 | 41.358 | 1.00 | 36.82 |     | H0 |
| ANISOU 5792 H PHE B 171    | 5680    | 4790    | 3520   | 310  | 500   | 310 | H0 |
| ATOM 5793 HA PHE B 171     | -50.606 | -14.264 | 43.226 | 1.00 | 37.90 |     | H0 |
| ANISOU 5793 HA PHE B 171   | 5950    | 4920    | 3530   | 250  | 690   | 350 | H0 |
| ATOM 5794 HB2 PHE B 171    | -50.259 | -12.995 | 40.698 | 1.00 | 35.23 |     | H0 |
| ANISOU 5794 HB2 PHE B 171  | 5270    | 4670    | 3440   | 120  | 540   | 200 | H0 |
| ATOM 5795 HB3 PHE B 171    | -51.357 | -12.597 | 41.773 | 1.00 | 35.93 |     | H0 |
| ANISOU 5795 HB3 PHE B 171  | 5420    | 4770    | 3460   | 110  | 640   | 220 | H0 |
| ATOM 5796 HD1 PHE B 171    | -50.688 | -11.365 | 43.798 | 1.00 | 37.47 |     | H0 |
| ANISOU 5796 HD1 PHE B 171  | 5760    | 5050    | 3420   | 270  | 540   | 200 | H0 |
| ATOM 5797 HD2 PHE B 171    | -47.935 | -12.303 | 41.014 | 1.00 | 35.83 |     | H0 |
| ANISOU 5797 HD2 PHE B 171  | 5320    | 4860    | 3440   | 280  | 290   | 180 | H0 |
| ATOM 5798 HE1 PHE B 171    | -49.171 | -9.922  | 44.808 | 1.00 | 38.19 |     | H0 |
| ANISOU 5798 HE1 PHE B 171  | 5910    | 5240    | 3360   | 380  | 290   | 130 | H0 |
| ATOM 5799 HE2 PHE B 171    | -46.421 | -10.858 | 42.027 | 1.00 | 36.61 |     | H0 |
| ANISOU 5799 HE2 PHE B 171  | 5380    | 5110    | 3420   | 360  | 50    | 140 | H0 |
| ATOM 5800 HZ PHE B 171     | -47.038 | -9.667  | 43.925 | 1.00 | 37.82 |     | H0 |
| ANISOU 5800 HZ PHE B 171   | 5710    | 5280    | 3380   | 390  | 30    | 100 | H0 |
| ATOM 5801 N GLU B 172      | -52.558 | -15.256 | 41.946 | 1.00 | 37.87 |     | N0 |
| ANISOU 5801 N GLU B 172    | 5860    | 4810    | 3710   | 0    | 910   | 360 | N0 |
| ATOM 5802 CA GLU B 172     | -53.647 | -16.030 | 41.307 | 1.00 | 38.51 |     | C0 |

|                            |         |         |        |      |       |     |    |
|----------------------------|---------|---------|--------|------|-------|-----|----|
| ANISOU 5802 CA GLU B 172   | 5920    | 4820    | 3890   | -160 | 1030  | 370 | C0 |
| ATOM 5803 C GLU B 172      | -54.788 | -15.065 | 40.978 | 1.00 | 38.12 |     | C0 |
| ANISOU 5803 C GLU B 172    | 5690    | 4880    | 3920   | -260 | 1070  | 320 | C0 |
| ATOM 5804 O GLU B 172      | -54.894 | -14.010 | 41.649 | 1.00 | 36.71 |     | O0 |
| ANISOU 5804 O GLU B 172    | 5480    | 4790    | 3680   | -180 | 1050  | 300 | O0 |
| ATOM 5805 CB GLU B 172     | -54.070 | -17.193 | 42.200 | 1.00 | 40.45 |     | C0 |
| ANISOU 5805 CB GLU B 172   | 6350    | 4950    | 4060   | -190 | 1180  | 470 | C0 |
| ATOM 5806 CG GLU B 172     | -54.682 | -16.774 | 43.519 | 1.00 | 41.97 |     | C0 |
| ANISOU 5806 CG GLU B 172   | 6600    | 5200    | 4150   | -150 | 1270  | 520 | C0 |
| ATOM 5807 CD GLU B 172     | -54.827 | -17.922 | 44.500 | 1.00 | 43.97 |     | C0 |
| ANISOU 5807 CD GLU B 172   | 7070    | 5330    | 4300   | -140 | 1410  | 640 | C0 |
| ATOM 5808 OE1 GLU B 172    | -54.912 | -19.083 | 44.039 | 1.00 | 45.34 |     | O0 |
| ANISOU 5808 OE1 GLU B 172  | 7330    | 5370    | 4530   | -220 | 1470  | 680 | O0 |
| ATOM 5809 OE2 GLU B 172    | -54.819 | -17.657 | 45.719 | 1.00 | 44.69 |     | O0 |
| ANISOU 5809 OE2 GLU B 172  | 7270    | 5460    | 4250   | -40  | 1450  | 690 | O0 |
| ATOM 5810 H GLU B 172      | -52.847 | -14.698 | 42.606 | 1.00 | 38.18 |     | H0 |
| ANISOU 5810 H GLU B 172    | 5910    | 4900    | 3700   | 20   | 930   | 360 | H0 |
| ATOM 5811 HA GLU B 172     | -53.304 | -16.398 | 40.460 | 1.00 | 38.10 |     | H0 |
| ANISOU 5811 HA GLU B 172   | 5850    | 4730    | 3900   | -190 | 990   | 340 | H0 |
| ATOM 5812 HB2 GLU B 172    | -54.719 | -17.740 | 41.710 | 1.00 | 40.94 |     | H0 |
| ANISOU 5812 HB2 GLU B 172  | 6390    | 4960    | 4200   | -310 | 1240  | 470 | H0 |
| ATOM 5813 HB3 GLU B 172    | -53.283 | -17.749 | 42.378 | 1.00 | 40.87 |     | H0 |
| ANISOU 5813 HB3 GLU B 172  | 6520    | 4940    | 4070   | -100 | 1140  | 500 | H0 |
| ATOM 5814 HG2 GLU B 172    | -54.124 | -16.080 | 43.930 | 1.00 | 41.42 |     | H0 |
| ANISOU 5814 HG2 GLU B 172  | 6530    | 5190    | 4020   | -40  | 1190  | 500 | H0 |
| ATOM 5815 HG3 GLU B 172    | -55.568 | -16.387 | 43.356 | 1.00 | 41.84 |     | H0 |
| ANISOU 5815 HG3 GLU B 172  | 6470    | 5240    | 4190   | -230 | 1330  | 500 | H0 |
| ATOM 5816 N ILE B 173      | -55.566 | -15.400 | 39.946 | 1.00 | 38.42 |     | N0 |
| ANISOU 5816 N ILE B 173    | 5620    | 4910    | 4070   | -410 | 1100  | 290 | N0 |
| ATOM 5817 CA ILE B 173     | -56.716 | -14.587 | 39.460 | 1.00 | 38.77 |     | C0 |
| ANISOU 5817 CA ILE B 173   | 5460    | 5070    | 4200   | -500 | 1130  | 240 | C0 |
| ATOM 5818 C ILE B 173      | -57.982 | -15.115 | 40.134 | 1.00 | 40.66 |     | C0 |
| ANISOU 5818 C ILE B 173    | 5700    | 5320    | 4430   | -600 | 1300  | 310 | C0 |
| ATOM 5819 O ILE B 173      | -58.248 | -16.325 | 40.010 | 1.00 | 41.52 |     | O0 |
| ANISOU 5819 O ILE B 173    | 5890    | 5320    | 4570   | -730 | 1370  | 350 | O0 |
| ATOM 5820 CB ILE B 173     | -56.836 | -14.642 | 37.926 | 1.00 | 37.97 |     | C0 |
| ANISOU 5820 CB ILE B 173   | 5240    | 4980    | 4210   | -600 | 1050  | 180 | C0 |
| ATOM 5821 CG1 ILE B 173    | -55.584 | -14.091 | 37.241 | 1.00 | 37.26 |     | C0 |
| ANISOU 5821 CG1 ILE B 173  | 5140    | 4890    | 4120   | -490 | 900   | 120 | C0 |
| ATOM 5822 CG2 ILE B 173    | -58.099 | -13.932 | 37.464 | 1.00 | 37.81 |     | C0 |
| ANISOU 5822 CG2 ILE B 173  | 5010    | 5090    | 4270   | -680 | 1070  | 140 | C0 |
| ATOM 5823 CD1 ILE B 173    | -55.632 | -14.172 | 35.729 | 1.00 | 36.97 |     | C0 |
| ANISOU 5823 CD1 ILE B 173  | 5010    | 4860    | 4180   | -580 | 830   | 60  | C0 |
| ATOM 5824 H ILE B 173      | -55.438 | -16.164 | 39.467 | 1.00 | 38.70 |     | H0 |
| ANISOU 5824 H ILE B 173    | 5700    | 4870    | 4140   | -460 | 1100  | 290 | H0 |
| ATOM 5825 HA ILE B 173     | -56.580 | -13.661 | 39.727 | 1.00 | 38.16 |     | H0 |
| ANISOU 5825 HA ILE B 173   | 5350    | 5070    | 4090   | -420 | 1080  | 220 | H0 |
| ATOM 5826 HB ILE B 173     | -56.918 | -15.594 | 37.671 | 1.00 | 38.71 |     | H0 |
| ANISOU 5826 HB ILE B 173   | 5390    | 4990    | 4330   | -680 | 1080  | 190 | H0 |
| ATOM 5827 HG12 ILE B 173   | -55.468 | -13.153 | 37.504 | 1.00 | 36.64 |     | H0 |
| ANISOU 5827 HG12 ILE B 173 | 5020    | 4880    | 4020   | -430 | 860   | 100 | H0 |
| ATOM 5828 HG13 ILE B 173   | -54.803 | -14.593 | 37.559 | 1.00 | 37.28 |     | H0 |
| ANISOU 5828 HG13 ILE B 173 | 5260    | 4830    | 4080   | -430 | 880   | 150 | H0 |
| ATOM 5829 HG21 ILE B 173   | -58.879 | -14.351 | 37.866 | 1.00 | 39.02 |     | H0 |

|                            |         |         |        |      |       |     |    |
|----------------------------|---------|---------|--------|------|-------|-----|----|
| ANISOU 5829 HG21 ILE B 173 | 5150    | 5250    | 4430   | -760 | 1180  | 180 | H0 |
| ATOM 5830 HG22 ILE B 173   | -58.170 | -13.988 | 36.496 | 1.00 | 37.54 |     | H0 |
| ANISOU 5830 HG22 ILE B 173 | 4910    | 5060    | 4290   | -740 | 1020  | 100 | H0 |
| ATOM 5831 HG23 ILE B 173   | -58.063 | -12.997 | 37.731 | 1.00 | 37.42 |     | H0 |
| ANISOU 5831 HG23 ILE B 173 | 4920    | 5110    | 4190   | -590 | 1050  | 130 | H0 |
| ATOM 5832 HD11 ILE B 173   | -55.968 | -15.044 | 35.459 | 1.00 | 37.56 |     | H0 |
| ANISOU 5832 HD11 ILE B 173 | 5120    | 4870    | 4280   | -670 | 870   | 70  | H0 |
| ATOM 5833 HD12 ILE B 173   | -54.738 | -14.044 | 35.368 | 1.00 | 36.18 |     | H0 |
| ANISOU 5833 HD12 ILE B 173 | 4930    | 4750    | 4070   | -510 | 750   | 40  | H0 |
| ATOM 5834 HD13 ILE B 173   | -56.220 | -13.478 | 35.383 | 1.00 | 36.59 |     | H0 |
| ANISOU 5834 HD13 ILE B 173 | 4840    | 4900    | 4160   | -600 | 810   | 30  | H0 |
| ATOM 5835 N LEU B 174      | -58.741 | -14.231 | 40.781 | 1.00 | 41.62 |     | N0 |
| ANISOU 5835 N LEU B 174    | 5730    | 5560    | 4520   | -560 | 1370  | 320 | N0 |
| ATOM 5836 CA LEU B 174     | -60.044 | -14.568 | 41.414 | 1.00 | 44.32 |     | C0 |
| ANISOU 5836 CA LEU B 174   | 6020    | 5950    | 4870   | -660 | 1550  | 380 | C0 |
| ATOM 5837 C LEU B 174      | -61.175 | -14.396 | 40.390 | 1.00 | 45.37 |     | C0 |
| ANISOU 5837 C LEU B 174    | 5910    | 6190    | 5140   | -810 | 1560  | 350 | C0 |
| ATOM 5838 O LEU B 174      | -62.099 | -15.228 | 40.403 | 1.00 | 46.57 |     | O0 |
| ANISOU 5838 O LEU B 174    | 6010    | 6340    | 5340   | -980 | 1680  | 400 | O0 |
| ATOM 5839 CB LEU B 174     | -60.248 | -13.669 | 42.637 | 1.00 | 44.67 |     | C0 |
| ANISOU 5839 CB LEU B 174   | 6100    | 6080    | 4800   | -510 | 1620  | 410 | C0 |
| ATOM 5840 CG LEU B 174     | -59.213 | -13.833 | 43.750 | 1.00 | 44.92 |     | C0 |
| ANISOU 5840 CG LEU B 174   | 6370    | 6020    | 4670   | -370 | 1610  | 450 | C0 |
| ATOM 5841 CD1 LEU B 174    | -59.519 | -12.895 | 44.906 | 1.00 | 45.61 |     | C0 |
| ANISOU 5841 CD1 LEU B 174  | 6500    | 6190    | 4630   | -220 | 1680  | 460 | C0 |
| ATOM 5842 CD2 LEU B 174    | -59.155 | -15.275 | 44.237 | 1.00 | 46.32 |     | C0 |
| ANISOU 5842 CD2 LEU B 174  | 6720    | 6070    | 4810   | -440 | 1710  | 550 | C0 |
| ATOM 5843 H LEU B 174      | -58.505 | -13.356 | 40.872 | 1.00 | 41.01 |     | H0 |
| ANISOU 5843 H LEU B 174    | 5620    | 5540    | 4420   | -470 | 1310  | 280 | H0 |
| ATOM 5844 HA LEU B 174     | -60.020 | -15.510 | 41.699 | 1.00 | 45.15 |     | H0 |
| ANISOU 5844 HA LEU B 174   | 6240    | 5960    | 4960   | -720 | 1620  | 440 | H0 |
| ATOM 5845 HB2 LEU B 174    | -60.238 | -12.737 | 42.339 | 1.00 | 43.92 |     | H0 |
| ANISOU 5845 HB2 LEU B 174  | 5920    | 6060    | 4720   | -440 | 1550  | 350 | H0 |
| ATOM 5846 HB3 LEU B 174    | -61.134 | -13.850 | 43.008 | 1.00 | 45.98 |     | H0 |
| ANISOU 5846 HB3 LEU B 174  | 6210    | 6290    | 4970   | -570 | 1750  | 450 | H0 |
| ATOM 5847 HG LEU B 174     | -58.326 | -13.595 | 43.385 | 1.00 | 43.76 |     | H0 |
| ANISOU 5847 HG LEU B 174   | 6260    | 5840    | 4520   | -310 | 1470  | 400 | H0 |
| ATOM 5848 HD11 LEU B 174   | -59.515 | -11.976 | 44.587 | 1.00 | 44.81 |     | H0 |
| ANISOU 5848 HD11 LEU B 174 | 6320    | 6160    | 4550   | -170 | 1600  | 390 | H0 |
| ATOM 5849 HD12 LEU B 174   | -58.844 | -13.000 | 45.598 | 1.00 | 45.76 |     | H0 |
| ANISOU 5849 HD12 LEU B 174 | 6680    | 6160    | 4540   | -140 | 1650  | 480 | H0 |
| ATOM 5850 HD13 LEU B 174   | -60.395 | -13.106 | 45.274 | 1.00 | 46.82 |     | H0 |
| ANISOU 5850 HD13 LEU B 174 | 6620    | 6390    | 4780   | -270 | 1820  | 510 | H0 |
| ATOM 5851 HD21 LEU B 174   | -60.059 | -15.622 | 44.334 | 1.00 | 47.43 |     | H0 |
| ANISOU 5851 HD21 LEU B 174 | 6810    | 6230    | 4990   | -550 | 1840  | 590 | H0 |
| ATOM 5852 HD22 LEU B 174   | -58.701 | -15.310 | 45.097 | 1.00 | 46.73 |     | H0 |
| ANISOU 5852 HD22 LEU B 174 | 6920    | 6090    | 4750   | -340 | 1720  | 580 | H0 |
| ATOM 5853 HD23 LEU B 174   | -58.667 | -15.817 | 43.593 | 1.00 | 45.79 |     | H0 |
| ANISOU 5853 HD23 LEU B 174 | 6680    | 5920    | 4790   | -490 | 1640  | 530 | H0 |
| ATOM 5854 N ASP B 175      | -61.106 | -13.358 | 39.545 | 1.00 | 45.34 |     | N0 |
| ANISOU 5854 N ASP B 175    | 5760    | 6280    | 5190   | -750 | 1430  | 270 | N0 |
| ATOM 5855 CA ASP B 175     | -62.118 | -13.078 | 38.491 | 1.00 | 47.02 |     | C0 |
| ANISOU 5855 CA ASP B 175   | 5740    | 6610    | 5520   | -850 | 1410  | 230 | C0 |
| ATOM 5856 C ASP B 175      | -61.602 | -12.011 | 37.516 | 1.00 | 45.38 |     | C0 |

|                            |         |         |        |       |       |      |    |
|----------------------------|---------|---------|--------|-------|-------|------|----|
| ANISOU 5856 C ASP B 175    | 5450    | 6450    | 5340   | -760  | 1250  | 140  | C0 |
| ATOM 5857 O ASP B 175      | -60.785 | -11.146 | 37.929 | 1.00  | 44.13 |      | O0 |
| ANISOU 5857 O ASP B 175    | 5390    | 6270    | 5110   | -590  | 1190  | 120  | O0 |
| ATOM 5858 CB ASP B 175     | -63.445 | -12.636 | 39.115 | 1.00  | 50.96 |      | C0 |
| ANISOU 5858 CB ASP B 175   | 6070    | 7270    | 6020   | -860  | 1560  | 270  | C0 |
| ATOM 5859 CG ASP B 175     | -64.638 | -12.676 | 38.172 | 1.00  | 53.80 |      | C0 |
| ANISOU 5859 CG ASP B 175   | 6170    | 7770    | 6510   | -1000 | 1550  | 250  | C0 |
| ATOM 5860 OD1 ASP B 175    | -64.660 | -13.537 | 37.266 | 1.00  | 55.45 |      | O0 |
| ANISOU 5860 OD1 ASP B 175  | 6350    | 7920    | 6790   | -1180 | 1490  | 230  | O0 |
| ATOM 5861 OD2 ASP B 175    | -65.549 | -11.849 | 38.361 | 1.00  | 57.43 |      | O0 |
| ANISOU 5861 OD2 ASP B 175  | 6440    | 8400    | 6980   | -930  | 1610  | 260  | O0 |
| ATOM 5862 H ASP B 175      | -60.429 | -12.748 | 39.574 | 1.00  | 44.35 |      | H0 |
| ANISOU 5862 H ASP B 175    | 5680    | 6150    | 5020   | -630  | 1350  | 230  | H0 |
| ATOM 5863 HA ASP B 175     | -62.273 | -13.912 | 37.989 | 1.00  | 47.65 |      | H0 |
| ANISOU 5863 HA ASP B 175   | 5810    | 6640    | 5650   | -990  | 1410  | 230  | H0 |
| ATOM 5864 HB2 ASP B 175    | -63.647 | -13.211 | 39.880 | 1.00  | 51.86 |      | H0 |
| ANISOU 5864 HB2 ASP B 175  | 6260    | 7350    | 6100   | -890  | 1670  | 330  | H0 |
| ATOM 5865 HB3 ASP B 175    | -63.348 | -11.719 | 39.443 | 1.00  | 50.37 |      | H0 |
| ANISOU 5865 HB3 ASP B 175  | 5990    | 7250    | 5900   | -710  | 1540  | 250  | H0 |
| ATOM 5866 N VAL B 176      | -62.082 | -12.071 | 36.269 | 1.00  | 44.36 |      | N0 |
| ANISOU 5866 N VAL B 176    | 5170    | 6380    | 5300   | -860  | 1170  | 100  | N0 |
| ATOM 5867 CA VAL B 176     | -61.874 | -11.035 | 35.213 | 1.00  | 42.70 |      | C0 |
| ANISOU 5867 CA VAL B 176   | 4860    | 6230    | 5130   | -780  | 1030  | 30   | C0 |
| ATOM 5868 C VAL B 176      | -63.242 | -10.683 | 34.617 | 1.00  | 44.06 |      | C0 |
| ANISOU 5868 C VAL B 176    | 4790    | 6580    | 5370   | -840  | 1040  | 20   | C0 |
| ATOM 5869 O VAL B 176      | -63.936 | -11.609 | 34.163 | 1.00  | 44.54 |      | O0 |
| ANISOU 5869 O VAL B 176    | 4760    | 6660    | 5500   | -1030 | 1070  | 30   | O0 |
| ATOM 5870 CB VAL B 176     | -60.892 | -11.527 | 34.132 | 1.00  | 40.73 |      | C0 |
| ANISOU 5870 CB VAL B 176   | 4700    | 5880    | 4900   | -830  | 910   | -20  | C0 |
| ATOM 5871 CG1 VAL B 176    | -60.733 | -10.512 | 33.014 | 1.00  | 39.94 |      | C0 |
| ANISOU 5871 CG1 VAL B 176  | 4500    | 5850    | 4820   | -760  | 780   | -80  | C0 |
| ATOM 5872 CG2 VAL B 176    | -59.538 | -11.885 | 34.725 | 1.00  | 39.57 |      | C0 |
| ANISOU 5872 CG2 VAL B 176  | 4770    | 5590    | 4680   | -750  | 890   | -10  | C0 |
| ATOM 5873 H VAL B 176      | -62.586 | -12.772 | 35.981 | 1.00  | 45.36 |      | H0 |
| ANISOU 5873 H VAL B 176    | 5250    | 6500    | 5480   | -990  | 1200  | 110  | H0 |
| ATOM 5874 HA VAL B 176     | -61.503 | -10.241 | 35.630 | 1.00  | 42.08 |      | H0 |
| ANISOU 5874 HA VAL B 176   | 4830    | 6160    | 5000   | -650  | 1020  | 20   | H0 |
| ATOM 5875 HB VAL B 176     | -61.274 | -12.349 | 33.738 | 1.00  | 41.62 |      | H0 |
| ANISOU 5875 HB VAL B 176   | 4790    | 5970    | 5050   | -960  | 920   | -20  | H0 |
| ATOM 5876 HG11 VAL B 176   | -61.512 | -10.543 | 32.432 | 1.00  | 40.50 |      | H0 |
| ANISOU 5876 HG11 VAL B 176 | 4450    | 6000    | 4940   | -830  | 760   | -90  | H0 |
| ATOM 5877 HG12 VAL B 176   | -59.935 | -10.720 | 32.497 | 1.00  | 39.08 |      | H0 |
| ANISOU 5877 HG12 VAL B 176 | 4470    | 5670    | 4710   | -760  | 710   | -100 | H0 |
| ATOM 5878 HG13 VAL B 176   | -60.648 | -9.621  | 33.395 | 1.00  | 39.51 |      | H0 |
| ANISOU 5878 HG13 VAL B 176 | 4450    | 5830    | 4740   | -650  | 780   | -80  | H0 |
| ATOM 5879 HG21 VAL B 176   | -59.155 | -11.101 | 35.156 | 1.00  | 39.12 |      | H0 |
| ANISOU 5879 HG21 VAL B 176 | 4730    | 5550    | 4580   | -640  | 870   | -10  | H0 |
| ATOM 5880 HG22 VAL B 176   | -58.943 | -12.188 | 34.018 | 1.00  | 39.10 |      | H0 |
| ANISOU 5880 HG22 VAL B 176 | 4750    | 5480    | 4630   | -770  | 820   | -30  | H0 |
| ATOM 5881 HG23 VAL B 176   | -59.648 | -12.594 | 35.382 | 1.00  | 40.45 |      | H0 |
| ANISOU 5881 HG23 VAL B 176 | 4950    | 5650    | 4770   | -800  | 970   | 40   | H0 |
| ATOM 5882 N THR B 177      | -63.631 | -9.404  | 34.662 | 1.00  | 45.18 |      | N0 |
| ANISOU 5882 N THR B 177    | 4830    | 6830    | 5500   | -690  | 1030  | 10   | N0 |
| ATOM 5883 CA THR B 177     | -64.853 | -8.870  | 33.998 | 1.00  | 47.73 |      | C0 |

|                            |         |         |        |      |       |      |    |
|----------------------------|---------|---------|--------|------|-------|------|----|
| ANISOU 5883 CA THR B 177   | 4900    | 7340    | 5890   | -700 | 1020  | 10   | C0 |
| ATOM 5884 C THR B 177      | -64.420 | -7.799  | 32.985 | 1.00 | 47.35 |      | C0 |
| ANISOU 5884 C THR B 177    | 4850    | 7310    | 5840   | -580 | 870   | -50  | C0 |
| ATOM 5885 O THR B 177      | -63.563 | -6.962  | 33.331 | 1.00 | 45.46 |      | O0 |
| ANISOU 5885 O THR B 177    | 4750    | 6990    | 5530   | -430 | 840   | -60  | O0 |
| ATOM 5886 CB THR B 177     | -65.904 | -8.386  | 35.015 | 1.00 | 49.70 |      | C0 |
| ANISOU 5886 CB THR B 177   | 5030    | 7730    | 6120   | -610 | 1170  | 60   | C0 |
| ATOM 5887 OG1 THR B 177    | -65.427 | -7.252  | 35.740 | 1.00 | 50.32 |      | O0 |
| ANISOU 5887 OG1 THR B 177  | 5240    | 7770    | 6110   | -390 | 1190  | 60   | O0 |
| ATOM 5888 CG2 THR B 177    | -66.297 | -9.455  | 36.011 | 1.00 | 51.10 |      | C0 |
| ANISOU 5888 CG2 THR B 177  | 5240    | 7890    | 6290   | -740 | 1330  | 130  | C0 |
| ATOM 5889 H THR B 177      | -63.169 | -8.760  | 35.110 | 1.00 | 44.61 |      | H0 |
| ANISOU 5889 H THR B 177    | 4840    | 6730    | 5380   | -570 | 1030  | 10   | H0 |
| ATOM 5890 HA THR B 177     | -65.255 | -9.612  | 33.491 | 1.00 | 48.36 |      | H0 |
| ANISOU 5890 HA THR B 177   | 4910    | 7450    | 6020   | -840 | 1010  | 0    | H0 |
| ATOM 5891 HB THR B 177     | -66.709 | -8.119  | 34.511 | 1.00 | 50.74 |      | H0 |
| ANISOU 5891 HB THR B 177   | 4980    | 8000    | 6300   | -610 | 1160  | 60   | H0 |
| ATOM 5892 HG21 THR B 177   | -66.595 | -10.251 | 35.535 | 1.00 | 51.68 |      | H0 |
| ANISOU 5892 HG21 THR B 177 | 5240    | 7970    | 6420   | -900 | 1320  | 130  | H0 |
| ATOM 5893 HG22 THR B 177   | -67.021 | -9.125  | 36.573 | 1.00 | 52.25 |      | H0 |
| ANISOU 5893 HG22 THR B 177 | 5280    | 8140    | 6430   | -680 | 1430  | 160  | H0 |
| ATOM 5894 HG23 THR B 177   | -65.531 | -9.679  | 36.569 | 1.00 | 50.37 |      | H0 |
| ANISOU 5894 HG23 THR B 177 | 5330    | 7670    | 6140   | -710 | 1350  | 130  | H0 |
| ATOM 5895 N GLN B 178      | -64.976 | -7.853  | 31.771 | 1.00 | 49.35 |      | N0 |
| ANISOU 5895 N GLN B 178    | 4940    | 7660    | 6150   | -650 | 780   | -70  | N0 |
| ATOM 5896 CA GLN B 178     | -64.662 | -6.933  | 30.645 | 1.00 | 49.91 |      | C0 |
| ANISOU 5896 CA GLN B 178   | 5000    | 7750    | 6210   | -550 | 640   | -110 | C0 |
| ATOM 5897 C GLN B 178      | -65.971 | -6.275  | 30.192 | 1.00 | 51.80 |      | C0 |
| ANISOU 5897 C GLN B 178    | 5000    | 8200    | 6490   | -490 | 620   | -100 | C0 |
| ATOM 5898 O GLN B 178      | -66.869 | -7.016  | 29.754 | 1.00 | 54.87 |      | O0 |
| ANISOU 5898 O GLN B 178    | 5210    | 8700    | 6940   | -640 | 610   | -100 | O0 |
| ATOM 5899 CB GLN B 178     | -63.967 | -7.697  | 29.513 | 1.00 | 49.85 |      | C0 |
| ANISOU 5899 CB GLN B 178   | 5070    | 7650    | 6220   | -680 | 520   | -160 | C0 |
| ATOM 5900 CG GLN B 178     | -62.876 | -8.646  | 30.001 | 1.00 | 49.81 |      | C0 |
| ANISOU 5900 CG GLN B 178   | 5260    | 7470    | 6190   | -760 | 560   | -160 | C0 |
| ATOM 5901 CD GLN B 178     | -61.788 | -8.933  | 28.988 | 1.00 | 50.25 |      | C0 |
| ANISOU 5901 CD GLN B 178   | 5440    | 7420    | 6230   | -780 | 450   | -210 | C0 |
| ATOM 5902 OE1 GLN B 178    | -61.302 | -8.052  | 28.281 | 1.00 | 48.76 |      | O0 |
| ANISOU 5902 OE1 GLN B 178  | 5270    | 7230    | 6020   | -680 | 360   | -230 | O0 |
| ATOM 5903 NE2 GLN B 178    | -61.352 | -10.182 | 28.942 | 1.00 | 51.63 |      | N0 |
| ANISOU 5903 NE2 GLN B 178  | 5720    | 7480    | 6410   | -910 | 460   | -220 | N0 |
| ATOM 5904 H GLN B 178      | -65.601 | -8.479  | 31.554 | 1.00 | 50.29 |      | H0 |
| ANISOU 5904 H GLN B 178    | 4960    | 7840    | 6310   | -770 | 790   | -70  | H0 |
| ATOM 5905 HA GLN B 178     | -64.055 | -6.234  | 30.973 | 1.00 | 48.94 |      | H0 |
| ANISOU 5905 HA GLN B 178   | 4990    | 7560    | 6050   | -430 | 630   | -120 | H0 |
| ATOM 5906 HB2 GLN B 178    | -64.641 | -8.211  | 29.022 | 1.00 | 50.85 |      | H0 |
| ANISOU 5906 HB2 GLN B 178  | 5080    | 7850    | 6390   | -790 | 500   | -170 | H0 |
| ATOM 5907 HB3 GLN B 178    | -63.576 | -7.046  | 28.894 | 1.00 | 49.16 |      | H0 |
| ANISOU 5907 HB3 GLN B 178  | 5010    | 7560    | 6120   | -600 | 440   | -180 | H0 |
| ATOM 5908 HG2 GLN B 178    | -62.463 | -8.264  | 30.803 | 1.00 | 49.45 |      | H0 |
| ANISOU 5908 HG2 GLN B 178  | 5300    | 7380    | 6110   | -670 | 600   | -140 | H0 |
| ATOM 5909 HG3 GLN B 178    | -63.292 | -9.495  | 30.262 | 1.00 | 50.83 |      | H0 |
| ANISOU 5909 HG3 GLN B 178  | 5370    | 7600    | 6350   | -870 | 610   | -150 | H0 |
| ATOM 5910 HE21 GLN B 178   | -61.046 | -10.516 | 28.184 | 1.00 | 51.01 |      | H0 |



|                            |         |         |        |      |       |      |    |
|----------------------------|---------|---------|--------|------|-------|------|----|
| ANISOU 5910 HE21 GLN B 178 | 5680    | 7370    | 6330   | -950 | 410   | -250 | H0 |
| ATOM 5911 HE22 GLN B 178   | -61.364 | -10.683 | 29.671 | 1.00 | 51.53 |      | H0 |
| ANISOU 5911 HE22 GLN B 178 | 5760    | 7420    | 6400   | -940 | 540   | -200 | H0 |
| ATOM 5912 N LYS B 179      | -66.078 | -4.947  | 30.330 | 1.00 | 51.53 |      | N0 |
| ANISOU 5912 N LYS B 179    | 4960    | 8200    | 6410   | -270 | 620   | -90  | N0 |
| ATOM 5913 CA LYS B 179     | -67.294 | -4.151  | 30.007 | 1.00 | 52.25 |      | C0 |
| ANISOU 5913 CA LYS B 179   | 4840    | 8490    | 6520   | -140 | 610   | -70  | C0 |
| ATOM 5914 C LYS B 179      | -66.939 | -2.988  | 29.071 | 1.00 | 49.51 |      | C0 |
| ANISOU 5914 C LYS B 179    | 4550    | 8120    | 6140   | 20   | 490   | -80  | C0 |
| ATOM 5915 O LYS B 179      | -65.836 | -2.433  | 29.173 | 1.00 | 46.64 |      | O0 |
| ANISOU 5915 O LYS B 179    | 4410    | 7590    | 5720   | 90   | 470   | -100 | O0 |
| ATOM 5916 CB LYS B 179     | -67.954 | -3.637  | 31.290 | 1.00 | 55.10 |      | C0 |
| ANISOU 5916 CB LYS B 179   | 5150    | 8930    | 6860   | 0    | 780   | -20  | C0 |
| ATOM 5917 CG LYS B 179     | -67.410 | -2.317  | 31.825 | 1.00 | 56.17 |      | C0 |
| ANISOU 5917 CG LYS B 179   | 5480    | 8960    | 6910   | 240  | 800   | -20  | C0 |
| ATOM 5918 CD LYS B 179     | -67.977 | -1.927  | 33.180 | 1.00 | 58.80 |      | C0 |
| ANISOU 5918 CD LYS B 179   | 5810    | 9340    | 7200   | 380  | 970   | 10   | C0 |
| ATOM 5919 CE LYS B 179     | -68.350 | -0.461  | 33.268 | 1.00 | 60.27 |      | C0 |
| ANISOU 5919 CE LYS B 179   | 6020    | 9550    | 7330   | 660  | 980   | 20   | C0 |
| ATOM 5920 NZ LYS B 179     | -69.039 | -0.147  | 34.542 | 1.00 | 62.90 |      | N0 |
| ANISOU 5920 NZ LYS B 179   | 6340    | 9960    | 7610   | 810  | 1160  | 50   | N0 |
| ATOM 5921 H LYS B 179      | -65.389 | -4.436  | 30.639 | 1.00 | 50.43 |      | H0 |
| ANISOU 5921 H LYS B 179    | 4970    | 7960    | 6230   | -180 | 620   | -100 | H0 |
| ATOM 5922 HA LYS B 179     | -67.932 | -4.740  | 29.542 | 1.00 | 53.29 |      | H0 |
| ANISOU 5922 HA LYS B 179   | 4810    | 8730    | 6700   | -260 | 590   | -70  | H0 |
| ATOM 5923 HB2 LYS B 179    | -68.913 | -3.530  | 31.121 | 1.00 | 56.57 |      | H0 |
| ANISOU 5923 HB2 LYS B 179  | 5140    | 9280    | 7080   | 30   | 790   | 0    | H0 |
| ATOM 5924 HB3 LYS B 179    | -67.849 | -4.319  | 31.985 | 1.00 | 55.13 |      | H0 |
| ANISOU 5924 HB3 LYS B 179  | 5190    | 8890    | 6860   | -90  | 860   | -10  | H0 |
| ATOM 5925 HG2 LYS B 179    | -66.434 | -2.385  | 31.897 | 1.00 | 54.64 |      | H0 |
| ANISOU 5925 HG2 LYS B 179  | 5460    | 8610    | 6690   | 200  | 760   | -50  | H0 |
| ATOM 5926 HG3 LYS B 179    | -67.613 | -1.606  | 31.181 | 1.00 | 56.27 |      | H0 |
| ANISOU 5926 HG3 LYS B 179  | 5450    | 9010    | 6920   | 350  | 730   | -30  | H0 |
| ATOM 5927 HD2 LYS B 179    | -68.775 | -2.468  | 33.361 | 1.00 | 59.87 |      | H0 |
| ANISOU 5927 HD2 LYS B 179  | 5770    | 9600    | 7370   | 320  | 1040  | 40   | H0 |
| ATOM 5928 HD3 LYS B 179    | -67.313 | -2.127  | 33.873 | 1.00 | 57.85 |      | H0 |
| ANISOU 5928 HD3 LYS B 179  | 5850    | 9090    | 7030   | 360  | 1010  | 0    | H0 |
| ATOM 5929 HE2 LYS B 179    | -67.546 | 0.087   | 33.198 | 1.00 | 59.23 |      | H0 |
| ANISOU 5929 HE2 LYS B 179  | 6080    | 9280    | 7150   | 720  | 920   | -10  | H0 |
| ATOM 5930 HE3 LYS B 179    | -68.938 | -0.229  | 32.525 | 1.00 | 61.06 |      | H0 |
| ANISOU 5930 HE3 LYS B 179  | 5970    | 9770    | 7460   | 700  | 930   | 30   | H0 |
| ATOM 5931 HZ1 LYS B 179    | -69.800 | -0.635  | 34.608 | 1.00 | 63.74 |      | H0 |
| ANISOU 5931 HZ1 LYS B 179  | 6260    | 10210   | 7750   | 760  | 1230  | 80   | H0 |
| ATOM 5932 HZ2 LYS B 179    | -69.248 | 0.735   | 34.569 | 1.00 | 63.15 |      | H0 |
| ANISOU 5932 HZ2 LYS B 179  | 6400    | 10000   | 7600   | 990  | 1170  | 50   | H0 |
| ATOM 5933 HZ3 LYS B 179    | -68.497 | -0.345  | 35.242 | 1.00 | 61.98 |      | H0 |
| ANISOU 5933 HZ3 LYS B 179  | 6370    | 9730    | 7450   | 780  | 1210  | 40   | H0 |
| ATOM 5934 N LYS B 180      | -67.883 | -2.621  | 28.209 | 1.00 | 50.41 |      | N0 |
| ANISOU 5934 N LYS B 180    | 4460    | 8420    | 6270   | 80   | 420   | -70  | N0 |
| ATOM 5935 CA LYS B 180     | -67.762 | -1.527  | 27.213 | 1.00 | 49.66 |      | C0 |
| ANISOU 5935 CA LYS B 180   | 4410    | 8320    | 6140   | 240  | 300   | -80  | C0 |
| ATOM 5936 C LYS B 180      | -68.289 | -0.228  | 27.833 | 1.00 | 49.03 |      | C0 |
| ANISOU 5936 C LYS B 180    | 4320    | 8290    | 6020   | 510  | 380   | -40  | C0 |
| ATOM 5937 O LYS B 180      | -69.387 | -0.254  | 28.428 | 1.00 | 50.12 |      | O0 |

|                           |         |        |        |      |       |      |    |
|---------------------------|---------|--------|--------|------|-------|------|----|
| ANISOU 5937 O LYS B 180   | 4260    | 8600   | 6180   | 580  | 470   | 0    | O0 |
| ATOM 5938 CB LYS B 180    | -68.545 | -1.912 | 25.953 | 1.00 | 51.84 |      | C0 |
| ANISOU 5938 CB LYS B 180  | 4470    | 8780   | 6450   | 160  | 170   | -80  | C0 |
| ATOM 5939 CG LYS B 180    | -68.620 | -0.853 | 24.863 | 1.00 | 52.96 |      | C0 |
| ANISOU 5939 CG LYS B 180  | 4630    | 8960   | 6530   | 340  | 50    | -70  | C0 |
| ATOM 5940 CD LYS B 180    | -69.797 | -1.074 | 23.945 | 1.00 | 55.99 |      | C0 |
| ANISOU 5940 CD LYS B 180  | 4730    | 9600   | 6940   | 320  | -60   | -60  | C0 |
| ATOM 5941 CE LYS B 180    | -69.777 | -0.203 | 22.708 | 1.00 | 56.65 |      | C0 |
| ANISOU 5941 CE LYS B 180  | 4860    | 9710   | 6960   | 470  | -200  | -50  | C0 |
| ATOM 5942 NZ LYS B 180    | -68.932 | -0.787 | 21.641 | 1.00 | 55.70 |      | N0 |
| ANISOU 5942 NZ LYS B 180  | 4870    | 9490   | 6800   | 310  | -320  | -100 | N0 |
| ATOM 5943 H LYS B 180     | -68.695 | -3.034 | 28.185 | 1.00 | 51.65 |      | H0 |
| ANISOU 5943 H LYS B 180   | 4440    | 8710   | 6470   | 10   | 440   | -60  | H0 |
| ATOM 5944 HA LYS B 180    | -66.813 | -1.413 | 26.981 | 1.00 | 48.23 |      | H0 |
| ANISOU 5944 HA LYS B 180  | 4400    | 8000   | 5930   | 220  | 260   | -100 | H0 |
| ATOM 5945 HB2 LYS B 180   | -68.135 | -2.717 | 25.572 | 1.00 | 51.19 |      | H0 |
| ANISOU 5945 HB2 LYS B 180 | 4430    | 8640   | 6380   | -10  | 130   | -120 | H0 |
| ATOM 5946 HB3 LYS B 180   | -69.459 | -2.144 | 26.219 | 1.00 | 53.27 |      | H0 |
| ANISOU 5946 HB3 LYS B 180 | 4460    | 9120   | 6660   | 150  | 210   | -60  | H0 |
| ATOM 5947 HG2 LYS B 180   | -68.697 | 0.033  | 25.276 | 1.00 | 53.22 |      | H0 |
| ANISOU 5947 HG2 LYS B 180 | 4710    | 8970   | 6540   | 520  | 100   | -40  | H0 |
| ATOM 5948 HG3 LYS B 180   | -67.792 | -0.873 | 24.339 | 1.00 | 51.78 |      | H0 |
| ANISOU 5948 HG3 LYS B 180 | 4630    | 8690   | 6360   | 300  | -10   | -90  | H0 |
| ATOM 5949 HD2 LYS B 180   | -69.813 | -2.016 | 23.669 | 1.00 | 55.85 |      | H0 |
| ANISOU 5949 HD2 LYS B 180 | 4660    | 9600   | 6950   | 130  | -100  | -100 | H0 |
| ATOM 5950 HD3 LYS B 180   | -70.621 | -0.895 | 24.442 | 1.00 | 57.20 |      | H0 |
| ANISOU 5950 HD3 LYS B 180 | 4730    | 9890   | 7120   | 390  | 0     | -30  | H0 |
| ATOM 5951 HE2 LYS B 180   | -70.686 | -0.095 | 22.369 | 1.00 | 58.30 |      | H0 |
| ANISOU 5951 HE2 LYS B 180 | 4870    | 10110  | 7170   | 530  | -250  | -30  | H0 |
| ATOM 5952 HE3 LYS B 180   | -69.433 | 0.681  | 22.937 | 1.00 | 56.15 |      | H0 |
| ANISOU 5952 HE3 LYS B 180 | 4930    | 9550   | 6850   | 640  | -170  | -30  | H0 |
| ATOM 5953 HZ1 LYS B 180   | -68.057 | -0.685 | 21.854 | 1.00 | 54.17 |      | H0 |
| ANISOU 5953 HZ1 LYS B 180 | 4860    | 9130   | 6590   | 300  | -280  | -110 | H0 |
| ATOM 5954 HZ2 LYS B 180   | -69.096 | -0.367 | 20.855 | 1.00 | 56.16 |      | H0 |
| ANISOU 5954 HZ2 LYS B 180 | 4920    | 9600   | 6820   | 390  | -410  | -90  | H0 |
| ATOM 5955 HZ3 LYS B 180   | -69.116 | -1.670 | 21.548 | 1.00 | 55.86 |      | H0 |
| ANISOU 5955 HZ3 LYS B 180 | 4810    | 9550   | 6860   | 150  | -340  | -130 | H0 |
| ATOM 5956 N ASN B 181     | -67.530 | 0.862  | 27.699 | 1.00 | 47.08 |      | N0 |
| ANISOU 5956 N ASN B 181   | 4300    | 7890   | 5710   | 670  | 340   | -40  | N0 |
| ATOM 5957 CA ASN B 181    | -67.980 | 2.237  | 28.039 | 1.00 | 47.96 |      | C0 |
| ANISOU 5957 CA ASN B 181  | 4450    | 8000   | 5770   | 950  | 390   | -10  | C0 |
| ATOM 5958 C ASN B 181     | -67.998 | 3.082  | 26.764 | 1.00 | 48.06 |      | C0 |
| ANISOU 5958 C ASN B 181   | 4490    | 8020   | 5750   | 1070 | 260   | 10   | C0 |
| ATOM 5959 O ASN B 181     | -67.108 | 2.895  | 25.910 | 1.00 | 46.11 |      | O0 |
| ANISOU 5959 O ASN B 181   | 4360    | 7670   | 5490   | 950  | 160   | -10  | O0 |
| ATOM 5960 CB ASN B 181    | -67.093 | 2.896  | 29.096 | 1.00 | 47.07 |      | C0 |
| ANISOU 5960 CB ASN B 181  | 4620    | 7670   | 5590   | 1030 | 470   | -30  | C0 |
| ATOM 5961 CG ASN B 181    | -67.026 | 2.094  | 30.376 | 1.00 | 46.59 |      | C0 |
| ANISOU 5961 CG ASN B 181  | 4560    | 7600   | 5540   | 920  | 600   | -40  | C0 |
| ATOM 5962 OD1 ASN B 181   | -68.056 | 1.783  | 30.969 | 1.00 | 48.86 |      | O0 |
| ANISOU 5962 OD1 ASN B 181 | 4660    | 8050   | 5850   | 960  | 700   | -10  | O0 |
| ATOM 5963 ND2 ASN B 181   | -65.824 | 1.748  | 30.801 | 1.00 | 44.76 |      | N0 |
| ANISOU 5963 ND2 ASN B 181 | 4530    | 7190   | 5290   | 800  | 590   | -70  | N0 |
| ATOM 5964 H ASN B 181     | -66.676 | 0.826  | 27.384 | 1.00 | 46.02 |      | H0 |

|                            |         |        |        |      |       |     |    |
|----------------------------|---------|--------|--------|------|-------|-----|----|
| ANISOU 5964 H ASN B 181    | 4300    | 7630   | 5560   | 610  | 290   | -60 | H0 |
| ATOM 5965 HA ASN B 181     | -68.896 | 2.189  | 28.401 | 1.00 | 49.40 |     | H0 |
| ANISOU 5965 HA ASN B 181   | 4470    | 8340   | 5970   | 1010 | 450   | 20  | H0 |
| ATOM 5966 HB2 ASN B 181    | -66.190 | 3.000  | 28.732 | 1.00 | 45.75 |     | H0 |
| ANISOU 5966 HB2 ASN B 181  | 4600    | 7370   | 5410   | 960  | 410   | -50 | H0 |
| ATOM 5967 HB3 ASN B 181    | -67.444 | 3.788  | 29.295 | 1.00 | 47.95 |     | H0 |
| ANISOU 5967 HB3 ASN B 181  | 4770    | 7780   | 5660   | 1220 | 500   | -10 | H0 |
| ATOM 5968 HD21 ASN B 181   | -65.739 | 1.148  | 31.445 | 1.00 | 44.64 |     | H0 |
| ANISOU 5968 HD21 ASN B 181 | 4520    | 7170   | 5280   | 720  | 650   | -80 | H0 |
| ATOM 5969 HD22 ASN B 181   | -65.103 | 2.116  | 30.444 | 1.00 | 43.95 |     | H0 |
| ANISOU 5969 HD22 ASN B 181 | 4560    | 6970   | 5170   | 790  | 520   | -90 | H0 |
| ATOM 5970 N SER B 182      | -68.998 | 3.951  | 26.648 | 1.00 | 50.57 |     | N0 |
| ANISOU 5970 N SER B 182    | 4700    | 8470   | 6040   | 1310 | 270   | 50  | N0 |
| ATOM 5971 CA SER B 182     | -69.094 | 5.031  | 25.636 | 1.00 | 51.89 |     | C0 |
| ANISOU 5971 CA SER B 182   | 4940    | 8630   | 6150   | 1510 | 170   | 90  | C0 |
| ATOM 5972 C SER B 182      | -69.157 | 6.368  | 26.380 | 1.00 | 52.64 |     | C0 |
| ANISOU 5972 C SER B 182    | 5220    | 8600   | 6180   | 1790 | 260   | 110 | C0 |
| ATOM 5973 O SER B 182      | -70.152 | 6.594  | 27.089 | 1.00 | 54.23 |     | O0 |
| ANISOU 5973 O SER B 182    | 5280    | 8940   | 6380   | 1960 | 370   | 130 | O0 |
| ATOM 5974 CB SER B 182     | -70.282 | 4.823  | 24.737 | 1.00 | 53.76 |     | C0 |
| ANISOU 5974 CB SER B 182   | 4880    | 9140   | 6410   | 1570 | 80    | 120 | C0 |
| ATOM 5975 OG SER B 182     | -70.361 | 5.855  | 23.768 | 1.00 | 55.18 |     | O0 |
| ANISOU 5975 OG SER B 182   | 5140    | 9300   | 6520   | 1770 | -20   | 160 | O0 |
| ATOM 5976 H SER B 182      | -69.722 | 3.942  | 27.201 | 1.00 | 51.74 |     | H0 |
| ANISOU 5976 H SER B 182    | 4730    | 8730   | 6200   | 1390 | 350   | 70  | H0 |
| ATOM 5977 HA SER B 182     | -68.268 | 5.016  | 25.082 | 1.00 | 50.49 |     | H0 |
| ANISOU 5977 HA SER B 182   | 4900    | 8320   | 5960   | 1420 | 100   | 70  | H0 |
| ATOM 5978 HB2 SER B 182    | -70.201 | 3.952  | 24.285 | 1.00 | 53.39 |     | H0 |
| ANISOU 5978 HB2 SER B 182  | 4730    | 9150   | 6400   | 1370 | 20    | 100 | H0 |
| ATOM 5979 HB3 SER B 182    | -71.104 | 4.814  | 25.278 | 1.00 | 55.27 |     | H0 |
| ANISOU 5979 HB3 SER B 182  | 4900    | 9480   | 6620   | 1650 | 150   | 140 | H0 |
| ATOM 5980 N VAL B 183      | -68.108 | 7.186  | 26.257 | 1.00 | 52.11 |     | N0 |
| ANISOU 5980 N VAL B 183    | 5470    | 8270   | 6050   | 1820 | 240   | 100 | N0 |
| ATOM 5981 CA VAL B 183     | -67.919 | 8.448  | 27.035 | 1.00 | 53.27 |     | C0 |
| ANISOU 5981 CA VAL B 183   | 5880    | 8230   | 6130   | 2040 | 320   | 100 | C0 |
| ATOM 5982 C VAL B 183      | -67.669 | 9.600  | 26.056 | 1.00 | 53.86 |     | C0 |
| ANISOU 5982 C VAL B 183    | 6150    | 8180   | 6140   | 2200 | 240   | 140 | C0 |
| ATOM 5983 O VAL B 183      | -66.923 | 9.394  | 25.081 | 1.00 | 52.44 |     | O0 |
| ANISOU 5983 O VAL B 183    | 6020    | 7930   | 5970   | 2040 | 130   | 140 | O0 |
| ATOM 5984 CB VAL B 183     | -66.759 | 8.319  | 28.046 | 1.00 | 51.61 |     | C0 |
| ANISOU 5984 CB VAL B 183   | 5900    | 7800   | 5910   | 1890 | 380   | 40  | C0 |
| ATOM 5985 CG1 VAL B 183    | -66.577 | 9.595  | 28.858 | 1.00 | 52.68 |     | C0 |
| ANISOU 5985 CG1 VAL B 183  | 6330    | 7730   | 5960   | 2090 | 460   | 20  | C0 |
| ATOM 5986 CG2 VAL B 183    | -66.934 | 7.121  | 28.968 | 1.00 | 51.01 |     | C0 |
| ANISOU 5986 CG2 VAL B 183  | 5660    | 7830   | 5880   | 1730 | 460   | 10  | C0 |
| ATOM 5987 H VAL B 183      | -67.427 | 7.021  | 25.675 | 1.00 | 50.99 |     | H0 |
| ANISOU 5987 H VAL B 183    | 5410    | 8050   | 5910   | 1700 | 170   | 90  | H0 |
| ATOM 5988 HA VAL B 183     | -68.738 | 8.633  | 27.527 | 1.00 | 54.59 |     | H0 |
| ANISOU 5988 HA VAL B 183   | 5940    | 8510   | 6290   | 2190 | 400   | 110 | H0 |
| ATOM 5989 HB VAL B 183     | -65.931 | 8.176  | 27.524 | 1.00 | 50.37 |     | H0 |
| ANISOU 5989 HB VAL B 183   | 5840    | 7540   | 5760   | 1740 | 310   | 30  | H0 |
| ATOM 5990 HG11 VAL B 183   | -66.166 | 10.280 | 28.302 | 1.00 | 52.69 |     | H0 |
| ANISOU 5990 HG11 VAL B 183 | 6480    | 7610   | 5930   | 2130 | 400   | 40  | H0 |
| ATOM 5991 HG12 VAL B 183   | -66.003 | 9.415  | 29.623 | 1.00 | 51.88 |     | H0 |

|                            |         |        |        |      |       |     |    |
|----------------------------|---------|--------|--------|------|-------|-----|----|
| ANISOU 5991 HG12 VAL B 183 | 6330    | 7530   | 5850   | 2000 | 500   | -20 | H0 |
| ATOM 5992 HG13 VAL B 183   | -67.444 | 9.908  | 29.170 | 1.00 | 54.18 |     | H0 |
| ANISOU 5992 HG13 VAL B 183 | 6440    | 8020   | 6130   | 2280 | 520   | 40  | H0 |
| ATOM 5993 HG21 VAL B 183   | -67.797 | 7.178  | 29.415 | 1.00 | 52.34 |     | H0 |
| ANISOU 5993 HG21 VAL B 183 | 5710    | 8130   | 6050   | 1850 | 540   | 30  | H0 |
| ATOM 5994 HG22 VAL B 183   | -66.225 | 7.116  | 29.634 | 1.00 | 50.17 |     | H0 |
| ANISOU 5994 HG22 VAL B 183 | 5710    | 7590   | 5760   | 1660 | 500   | -30 | H0 |
| ATOM 5995 HG23 VAL B 183   | -66.893 | 6.300  | 28.447 | 1.00 | 50.31 |     | H0 |
| ANISOU 5995 HG23 VAL B 183 | 5440    | 7830   | 5840   | 1570 | 410   | 10  | H0 |
| ATOM 5996 N THR B 184      | -68.268 | 10.763 | 26.329 | 1.00 | 56.50 |     | N0 |
| ANISOU 5996 N THR B 184    | 6590    | 8470   | 6410   | 2500 | 290   | 170 | N0 |
| ATOM 5997 CA THR B 184     | -67.996 | 12.060 | 25.651 | 1.00 | 57.94 |     | C0 |
| ANISOU 5997 CA THR B 184   | 7040    | 8460   | 6510   | 2690 | 250   | 210 | C0 |
| ATOM 5998 C THR B 184      | -67.142 | 12.922 | 26.588 | 1.00 | 58.06 |     | C0 |
| ANISOU 5998 C THR B 184    | 7420    | 8160   | 6470   | 2710 | 320   | 170 | C0 |
| ATOM 5999 O THR B 184      | -67.552 | 13.115 | 27.757 | 1.00 | 58.81 |     | O0 |
| ANISOU 5999 O THR B 184    | 7550    | 8250   | 6540   | 2830 | 440   | 140 | O0 |
| ATOM 6000 CB THR B 184     | -69.302 | 12.748 | 25.239 | 1.00 | 60.77 |     | C0 |
| ANISOU 6000 CB THR B 184   | 7270    | 8990   | 6830   | 3030 | 250   | 290 | C0 |
| ATOM 6001 OG1 THR B 184    | -70.002 | 11.854 | 24.373 | 1.00 | 60.89 |     | O0 |
| ANISOU 6001 OG1 THR B 184  | 6930    | 9310   | 6900   | 2960 | 150   | 320 | O0 |
| ATOM 6002 CG2 THR B 184    | -69.081 | 14.070 | 24.537 | 1.00 | 62.28 |     | C0 |
| ANISOU 6002 CG2 THR B 184  | 7760    | 8980   | 6930   | 3240 | 200   | 340 | C0 |
| ATOM 6003 H THR B 184      | -68.908 | 10.843 | 26.972 | 1.00 | 57.52 |     | H0 |
| ANISOU 6003 H THR B 184    | 6640    | 8680   | 6530   | 2630 | 370   | 170 | H0 |
| ATOM 6004 HA THR B 184     | -67.474 | 11.873 | 24.837 | 1.00 | 57.01 |     | H0 |
| ANISOU 6004 HA THR B 184   | 6940    | 8310   | 6400   | 2560 | 160   | 230 | H0 |
| ATOM 6005 HB THR B 184     | -69.844 | 12.902 | 26.050 | 1.00 | 61.80 |     | H0 |
| ANISOU 6005 HB THR B 184   | 7360    | 9170   | 6950   | 3170 | 340   | 280 | H0 |
| ATOM 6006 HG21 THR B 184   | -68.754 | 14.729 | 25.175 | 1.00 | 62.49 |     | H0 |
| ANISOU 6006 HG21 THR B 184 | 8020    | 8810   | 6920   | 3310 | 270   | 320 | H0 |
| ATOM 6007 HG22 THR B 184   | -69.923 | 14.380 | 24.156 | 1.00 | 63.91 |     | H0 |
| ANISOU 6007 HG22 THR B 184 | 7850    | 9320   | 7110   | 3460 | 190   | 400 | H0 |
| ATOM 6008 HG23 THR B 184   | -68.427 | 13.956 | 23.825 | 1.00 | 61.13 |     | H0 |
| ANISOU 6008 HG23 THR B 184 | 7680    | 8760   | 6790   | 3100 | 130   | 350 | H0 |
| ATOM 6009 N TYR B 185      | -65.991 | 13.393 | 26.096 | 1.00 | 56.96 |     | N0 |
| ANISOU 6009 N TYR B 185    | 7550    | 7780   | 6310   | 2570 | 260   | 170 | N0 |
| ATOM 6010 CA TYR B 185     | -64.977 | 14.158 | 26.868 | 1.00 | 56.80 |     | C0 |
| ANISOU 6010 CA TYR B 185   | 7880    | 7450   | 6250   | 2510 | 300   | 110 | C0 |
| ATOM 6011 C TYR B 185      | -64.978 | 15.624 | 26.420 | 1.00 | 59.76 |     | C0 |
| ANISOU 6011 C TYR B 185    | 8570    | 7600   | 6540   | 2730 | 300   | 160 | C0 |
| ATOM 6012 O TYR B 185      | -65.605 | 15.946 | 25.393 | 1.00 | 60.86 |     | O0 |
| ANISOU 6012 O TYR B 185    | 8640    | 7830   | 6650   | 2900 | 250   | 240 | O0 |
| ATOM 6013 CB TYR B 185     | -63.595 | 13.534 | 26.689 | 1.00 | 53.39 |     | C0 |
| ANISOU 6013 CB TYR B 185   | 7500    | 6920   | 5870   | 2170 | 240   | 80  | C0 |
| ATOM 6014 CG TYR B 185     | -63.484 | 12.095 | 27.126 | 1.00 | 51.05 |     | C0 |
| ANISOU 6014 CG TYR B 185   | 6950    | 6800   | 5640   | 1960 | 250   | 30  | C0 |
| ATOM 6015 CD1 TYR B 185    | -63.196 | 11.763 | 28.441 | 1.00 | 49.86 |     | C0 |
| ANISOU 6015 CD1 TYR B 185  | 6840    | 6610   | 5490   | 1880 | 310   | -30 | C0 |
| ATOM 6016 CD2 TYR B 185    | -63.637 | 11.060 | 26.215 | 1.00 | 49.68 |     | C0 |
| ANISOU 6016 CD2 TYR B 185  | 6520    | 6820   | 5530   | 1830 | 180   | 60  | C0 |
| ATOM 6017 CE1 TYR B 185    | -63.076 | 10.441 | 28.842 | 1.00 | 48.43 |     | C0 |
| ANISOU 6017 CE1 TYR B 185  | 6460    | 6570   | 5370   | 1690 | 330   | -60 | C0 |
| ATOM 6018 CE2 TYR B 185    | -63.520 | 9.734  | 26.598 | 1.00 | 47.93 |     | C0 |

|             |               |         |        |        |      |       |      |    |
|-------------|---------------|---------|--------|--------|------|-------|------|----|
| ANISOU 6018 | CE2 TYR B 185 | 6100    | 6740   | 5370   | 1630 | 190   | 20   | C0 |
| ATOM 6019   | CZ TYR B 185  | -63.234 | 9.423  | 27.916 | 1.00 | 47.16 |      | C0 |
| ANISOU 6019 | CZ TYR B 185  | 6050    | 6590   | 5280   | 1570 | 270   | -40  | C0 |
| ATOM 6020   | OH TYR B 185  | -63.115 | 8.118  | 28.292 | 1.00 | 45.17 |      | O0 |
| ANISOU 6020 | OH TYR B 185  | 5620    | 6460   | 5090   | 1390 | 280   | -60  | O0 |
| ATOM 6021   | H TYR B 185   | -65.743 | 13.276 | 25.228 | 1.00 | 56.56 |      | H0 |
| ANISOU 6021 | H TYR B 185   | 7470    | 7740   | 6270   | 2500 | 190   | 200  | H0 |
| ATOM 6022   | HA TYR B 185  | -65.217 | 14.125 | 27.829 | 1.00 | 57.11 |      | H0 |
| ANISOU 6022 | HA TYR B 185  | 7930    | 7490   | 6270   | 2570 | 380   | 70   | H0 |
| ATOM 6023   | HB2 TYR B 185 | -63.351 | 13.594 | 25.742 | 1.00 | 53.28 |      | H0 |
| ANISOU 6023 | HB2 TYR B 185 | 7490    | 6900   | 5860   | 2120 | 180   | 120  | H0 |
| ATOM 6024   | HB3 TYR B 185 | -62.948 | 14.067 | 27.197 | 1.00 | 53.56 |      | H0 |
| ANISOU 6024 | HB3 TYR B 185 | 7750    | 6740   | 5860   | 2120 | 260   | 40   | H0 |
| ATOM 6025   | HD1 TYR B 185 | -63.081 | 12.450 | 29.077 | 1.00 | 50.79 |      | H0 |
| ANISOU 6025 | HD1 TYR B 185 | 7150    | 6590   | 5560   | 1960 | 350   | -60  | H0 |
| ATOM 6026   | HD2 TYR B 185 | -63.826 | 11.263 | 25.314 | 1.00 | 50.07 |      | H0 |
| ANISOU 6026 | HD2 TYR B 185 | 6540    | 6910   | 5570   | 1880 | 130   | 100  | H0 |
| ATOM 6027   | HE1 TYR B 185 | -62.881 | 10.235 | 29.741 | 1.00 | 48.14 |      | H0 |
| ANISOU 6027 | HE1 TYR B 185 | 6460    | 6500   | 5330   | 1660 | 370   | -100 | H0 |
| ATOM 6028   | HE2 TYR B 185 | -63.629 | 9.045  | 25.964 | 1.00 | 47.42 |      | H0 |
| ANISOU 6028 | HE2 TYR B 185 | 5880    | 6790   | 5350   | 1550 | 140   | 30   | H0 |
| ATOM 6029   | N SER B 186   | -64.278 | 16.478 | 27.175 | 1.00 | 61.84 |      | N0 |
| ANISOU 6029 | N SER B 186   | 9180    | 7570   | 6750   | 2720 | 340   | 110  | N0 |
| ATOM 6030   | CA SER B 186  | -64.258 | 17.957 | 27.010 | 1.00 | 64.84 |      | C0 |
| ANISOU 6030 | CA SER B 186  | 9920    | 7680   | 7040   | 2930 | 360   | 140  | C0 |
| ATOM 6031   | C SER B 186   | -63.607 | 18.355 | 25.678 | 1.00 | 64.98 |      | C0 |
| ANISOU 6031 | C SER B 186   | 10060   | 7580   | 7050   | 2830 | 270   | 220  | C0 |
| ATOM 6032   | O SER B 186   | -63.974 | 19.420 | 25.157 | 1.00 | 67.49 |      | O0 |
| ANISOU 6032 | O SER B 186   | 10590   | 7760   | 7300   | 3060 | 270   | 290  | O0 |
| ATOM 6033   | CB SER B 186  | -63.572 | 18.624 | 28.179 | 1.00 | 65.78 |      | C0 |
| ANISOU 6033 | CB SER B 186  | 10380   | 7510   | 7100   | 2870 | 410   | 50   | C0 |
| ATOM 6034   | OG SER B 186  | -62.279 | 18.078 | 28.395 | 1.00 | 64.28 |      | O0 |
| ANISOU 6034 | OG SER B 186  | 10210   | 7250   | 6970   | 2500 | 350   | 0    | O0 |
| ATOM 6035   | H SER B 186   | -63.747 | 16.204 | 27.863 | 1.00 | 60.77 |      | H0 |
| ANISOU 6035 | H SER B 186   | 9080    | 7380   | 6630   | 2580 | 360   | 50   | H0 |
| ATOM 6036   | HA SER B 186  | -65.203 | 18.269 | 26.990 | 1.00 | 66.35 |      | H0 |
| ANISOU 6036 | HA SER B 186  | 10060   | 7960   | 7190   | 3190 | 390   | 180  | H0 |
| ATOM 6037   | HB2 SER B 186 | -63.495 | 19.589 | 28.004 | 1.00 | 67.27 |      | H0 |
| ANISOU 6037 | HB2 SER B 186 | 10830   | 7500   | 7230   | 2980 | 420   | 70   | H0 |
| ATOM 6038   | HB3 SER B 186 | -64.118 | 18.503 | 28.989 | 1.00 | 66.33 |      | H0 |
| ANISOU 6038 | HB3 SER B 186 | 10400   | 7650   | 7150   | 3000 | 480   | 20   | H0 |
| ATOM 6039   | N CYS B 187   | -62.684 | 17.539 | 25.150 | 1.00 | 63.95 |      | N0 |
| ANISOU 6039 | N CYS B 187   | 9810    | 7500   | 6990   | 2510 | 200   | 220  | N0 |
| ATOM 6040   | CA CYS B 187  | -61.899 | 17.828 | 23.915 | 1.00 | 63.93 |      | C0 |
| ANISOU 6040 | CA CYS B 187  | 9920    | 7390   | 6980   | 2370 | 130   | 290  | C0 |
| ATOM 6041   | C CYS B 187   | -62.821 | 17.929 | 22.695 | 1.00 | 64.65 |      | C0 |
| ANISOU 6041 | C CYS B 187   | 9890    | 7640   | 7040   | 2590 | 80    | 390  | C0 |
| ATOM 6042   | O CYS B 187   | -62.569 | 18.791 | 21.838 | 1.00 | 65.52 |      | O0 |
| ANISOU 6042 | O CYS B 187   | 10220   | 7580   | 7090   | 2650 | 60    | 470  | O0 |
| ATOM 6043   | CB CYS B 187  | -60.845 | 16.760 | 23.629 | 1.00 | 61.90 |      | C0 |
| ANISOU 6043 | CB CYS B 187  | 9500    | 7210   | 6810   | 2020 | 80    | 260  | C0 |
| ATOM 6044   | SG CYS B 187  | -61.515 | 15.123 | 23.221 | 1.00 | 60.96 |      | S0 |
| ANISOU 6044 | SG CYS B 187  | 8920    | 7480   | 6760   | 1960 | 40    | 260  | S0 |
| ATOM 6045   | H CYS B 187   | -62.460 | 16.737 | 25.518 | 1.00 | 62.33 |      | H0 |

|                           |         |        |        |      |       |     |    |
|---------------------------|---------|--------|--------|------|-------|-----|----|
| ANISOU 6045 H CYS B 187   | 9450    | 7400   | 6840   | 2360 | 200   | 170 | H0 |
| ATOM 6046 HA CYS B 187    | -61.444 | 18.692 | 24.038 | 1.00 | 64.85 |     | H0 |
| ANISOU 6046 HA CYS B 187  | 10310   | 7270   | 7060   | 2370 | 150   | 290 | H0 |
| ATOM 6047 HB2 CYS B 187   | -60.289 | 17.058 | 22.881 | 1.00 | 62.06 |     | H0 |
| ANISOU 6047 HB2 CYS B 187 | 9620    | 7140   | 6820   | 1930 | 50    | 310 | H0 |
| ATOM 6048 HB3 CYS B 187   | -60.264 | 16.670 | 24.411 | 1.00 | 61.39 |     | H0 |
| ANISOU 6048 HB3 CYS B 187 | 9500    | 7060   | 6760   | 1880 | 100   | 200 | H0 |
| ATOM 6049 N CYS B 188     | -63.839 | 17.067 | 22.633 | 1.00 | 64.68 |     | N0 |
| ANISOU 6049 N CYS B 188   | 9540    | 7960   | 7070   | 2700 | 70    | 390 | N0 |
| ATOM 6050 CA CYS B 188    | -64.427 | 16.549 | 21.369 | 1.00 | 64.54 |     | C0 |
| ANISOU 6050 CA CYS B 188  | 9290    | 8180   | 7050   | 2750 | -20   | 460 | C0 |
| ATOM 6051 C CYS B 188     | -65.952 | 16.446 | 21.477 | 1.00 | 65.07 |     | C0 |
| ANISOU 6051 C CYS B 188   | 9100    | 8510   | 7100   | 3050 | -20   | 490 | C0 |
| ATOM 6052 O CYS B 188     | -66.484 | 16.096 | 22.529 | 1.00 | 64.11 |     | O0 |
| ANISOU 6052 O CYS B 188   | 8840    | 8500   | 7020   | 3100 | 50    | 430 | O0 |
| ATOM 6053 CB CYS B 188    | -63.798 | 15.193 | 21.055 | 1.00 | 62.87 |     | C0 |
| ANISOU 6053 CB CYS B 188  | 8850    | 8120   | 6920   | 2430 | -70   | 420 | C0 |
| ATOM 6054 SG CYS B 188    | -61.987 | 15.154 | 21.214 | 1.00 | 62.51 |     | S0 |
| ANISOU 6054 SG CYS B 188  | 9020    | 7820   | 6910   | 2070 | -60   | 380 | S0 |
| ATOM 6055 H CYS B 188     | -64.253 | 16.728 | 23.369 | 1.00 | 64.43 |     | H0 |
| ANISOU 6055 H CYS B 188   | 9400    | 8020   | 7070   | 2730 | 110   | 340 | H0 |
| ATOM 6056 HA CYS B 188    | -64.198 | 17.176 | 20.646 | 1.00 | 65.30 |     | H0 |
| ANISOU 6056 HA CYS B 188  | 9550    | 8170   | 7100   | 2800 | -50   | 520 | H0 |
| ATOM 6057 HB2 CYS B 188   | -64.175 | 14.520 | 21.657 | 1.00 | 62.45 |     | H0 |
| ANISOU 6057 HB2 CYS B 188 | 8610    | 8210   | 6910   | 2400 | -50   | 370 | H0 |
| ATOM 6058 HB3 CYS B 188   | -64.031 | 14.939 | 20.140 | 1.00 | 63.17 |     | H0 |
| ANISOU 6058 HB3 CYS B 188 | 8780    | 8280   | 6940   | 2440 | -140  | 460 | H0 |
| ATOM 6059 N PRO B 189     | -66.712 | 16.759 | 20.399 | 1.00 | 66.14 |     | N0 |
| ANISOU 6059 N PRO B 189   | 9170    | 8780   | 7180   | 3270 | -90   | 580 | N0 |
| ATOM 6060 CA PRO B 189    | -68.160 | 16.530 | 20.383 | 1.00 | 67.35 |     | C0 |
| ANISOU 6060 CA PRO B 189  | 9010    | 9250   | 7330   | 3520 | -110  | 600 | C0 |
| ATOM 6061 C PRO B 189     | -68.589 | 15.057 | 20.243 | 1.00 | 65.29 |     | C0 |
| ANISOU 6061 C PRO B 189   | 8330    | 9320   | 7160   | 3330 | -170  | 560 | C0 |
| ATOM 6062 O PRO B 189     | -69.694 | 14.741 | 20.647 | 1.00 | 66.18 |     | O0 |
| ANISOU 6062 O PRO B 189   | 8160    | 9680   | 7300   | 3480 | -150  | 560 | O0 |
| ATOM 6063 CB PRO B 189    | -68.639 | 17.333 | 19.161 | 1.00 | 69.40 |     | C0 |
| ANISOU 6063 CB PRO B 189  | 9360    | 9520   | 7490   | 3790 | -200  | 720 | C0 |
| ATOM 6064 CG PRO B 189    | -67.438 | 17.378 | 18.244 | 1.00 | 68.28 |     | C0 |
| ANISOU 6064 CG PRO B 189  | 9440    | 9190   | 7320   | 3550 | -250  | 750 | C0 |
| ATOM 6065 CD PRO B 189    | -66.231 | 17.394 | 19.162 | 1.00 | 66.30 |     | C0 |
| ANISOU 6065 CD PRO B 189  | 9400    | 8670   | 7120   | 3280 | -160  | 670 | C0 |
| ATOM 6066 HA PRO B 189    | -68.559 | 16.918 | 21.202 | 1.00 | 68.19 |     | H0 |
| ANISOU 6066 HA PRO B 189  | 9160    | 9320   | 7430   | 3680 | -30   | 590 | H0 |
| ATOM 6067 HB2 PRO B 189   | -69.396 | 16.889 | 18.722 | 1.00 | 70.15 |     | H0 |
| ANISOU 6067 HB2 PRO B 189 | 9200    | 9870   | 7590   | 3860 | -260  | 740 | H0 |
| ATOM 6068 HB3 PRO B 189   | -68.912 | 18.238 | 19.422 | 1.00 | 71.12 |     | H0 |
| ANISOU 6068 HB3 PRO B 189 | 9760    | 9610   | 7650   | 4020 | -140  | 750 | H0 |
| ATOM 6069 HG2 PRO B 189   | -67.418 | 16.592 | 17.661 | 1.00 | 67.30 |     | H0 |
| ANISOU 6069 HG2 PRO B 189 | 9130    | 9230   | 7220   | 3410 | -320  | 740 | H0 |
| ATOM 6070 HG3 PRO B 189   | -67.458 | 18.182 | 17.686 | 1.00 | 69.61 |     | H0 |
| ANISOU 6070 HG3 PRO B 189 | 9800    | 9240   | 7410   | 3710 | -270  | 820 | H0 |
| ATOM 6071 HD2 PRO B 189   | -65.493 | 16.888 | 18.775 | 1.00 | 64.93 |     | H0 |
| ANISOU 6071 HD2 PRO B 189 | 9220    | 8470   | 6980   | 3050 | -190  | 650 | H0 |
| ATOM 6072 HD3 PRO B 189   | -65.934 | 18.306 | 19.333 | 1.00 | 67.35 |     | H0 |

|             |               |         |        |        |      |       |     |    |
|-------------|---------------|---------|--------|--------|------|-------|-----|----|
| ANISOU 6072 | HD3 PRO B 189 | 9810    | 8570   | 7210   | 3370 | -110  | 690 | H0 |
| ATOM 6073   | N GLU B 190   | -67.729 | 14.196 | 19.687 | 1.00 | 62.41 |     | N0 |
| ANISOU 6073 | N GLU B 190   | 7930    | 8950   | 6830   | 3010 | -240  | 530 | N0 |
| ATOM 6074   | CA GLU B 190  | -68.055 | 12.773 | 19.378 | 1.00 | 60.73 |     | C0 |
| ANISOU 6074 | CA GLU B 190  | 7360    | 9020   | 6690   | 2810 | -310  | 480 | C0 |
| ATOM 6075   | C GLU B 190   | -67.686 | 11.889 | 20.578 | 1.00 | 57.66 |     | C0 |
| ANISOU 6075 | C GLU B 190   | 6880    | 8630   | 6400   | 2580 | -220  | 390 | C0 |
| ATOM 6076   | O GLU B 190   | -66.738 | 12.238 | 21.315 | 1.00 | 56.41 |     | O0 |
| ANISOU 6076 | O GLU B 190   | 6970    | 8220   | 6250   | 2490 | -140  | 350 | O0 |
| ATOM 6077   | CB GLU B 190  | -67.334 | 12.268 | 18.123 | 1.00 | 59.94 |     | C0 |
| ANISOU 6077 | CB GLU B 190  | 7290    | 8920   | 6560   | 2600 | -420  | 490 | C0 |
| ATOM 6078   | CG GLU B 190  | -67.183 | 13.303 | 17.018 | 1.00 | 61.67 |     | C0 |
| ANISOU 6078 | CG GLU B 190  | 7740    | 9020   | 6670   | 2780 | -480  | 590 | C0 |
| ATOM 6079   | CD GLU B 190  | -65.895 | 14.107 | 17.087 | 1.00 | 61.57 |     | C0 |
| ANISOU 6079 | CD GLU B 190  | 8110    | 8660   | 6620   | 2690 | -410  | 610 | C0 |
| ATOM 6080   | OE1 GLU B 190 | -65.198 | 14.014 | 18.120 | 1.00 | 60.83 |     | O0 |
| ANISOU 6080 | OE1 GLU B 190 | 8100    | 8410   | 6600   | 2540 | -320  | 540 | O0 |
| ATOM 6081   | OE2 GLU B 190 | -65.588 | 14.827 | 16.112 | 1.00 | 63.02 |     | O0 |
| ANISOU 6081 | OE2 GLU B 190 | 8500    | 8730   | 6710   | 2770 | -450  | 690 | O0 |
| ATOM 6082   | H GLU B 190   | -66.871 | 14.424 | 19.491 | 1.00 | 61.59 |     | H0 |
| ANISOU 6082 | H GLU B 190   | 8020    | 8670   | 6710   | 2900 | -230  | 530 | H0 |
| ATOM 6083   | HA GLU B 190  | -69.026 | 12.706 | 19.229 | 1.00 | 62.11 |     | H0 |
| ANISOU 6083 | HA GLU B 190  | 7340    | 9400   | 6860   | 2960 | -340  | 510 | H0 |
| ATOM 6084   | HB2 GLU B 190 | -66.445 | 11.948 | 18.382 | 1.00 | 58.27 |     | H0 |
| ANISOU 6084 | HB2 GLU B 190 | 7180    | 8580   | 6390   | 2400 | -380  | 450 | H0 |
| ATOM 6085   | HB3 GLU B 190 | -67.833 | 11.503 | 17.768 | 1.00 | 60.02 |     | H0 |
| ANISOU 6085 | HB3 GLU B 190 | 7070    | 9140   | 6590   | 2540 | -490  | 480 | H0 |
| ATOM 6086   | HG2 GLU B 190 | -67.219 | 12.848 | 16.150 | 1.00 | 61.72 |     | H0 |
| ANISOU 6086 | HG2 GLU B 190 | 7660    | 9150   | 6640   | 2710 | -570  | 600 | H0 |
| ATOM 6087   | HG3 GLU B 190 | -67.941 | 13.925 | 17.057 | 1.00 | 63.53 |     | H0 |
| ANISOU 6087 | HG3 GLU B 190 | 7970    | 9310   | 6860   | 3020 | -480  | 640 | H0 |
| ATOM 6088   | N ALA B 191   | -68.415 | 10.784 | 20.756 | 1.00 | 56.20 |     | N0 |
| ANISOU 6088 | N ALA B 191   | 6360    | 8710   | 6280   | 2480 | -240  | 360 | N0 |
| ATOM 6089   | CA ALA B 191  | -68.180 | 9.767  | 21.806 | 1.00 | 53.48 |     | C0 |
| ANISOU 6089 | CA ALA B 191  | 5900    | 8390   | 6030   | 2260 | -160  | 280 | C0 |
| ATOM 6090   | C ALA B 191   | -66.969 | 8.904  | 21.429 | 1.00 | 50.37 |     | C0 |
| ANISOU 6090 | C ALA B 191   | 5590    | 7890   | 5660   | 1940 | -200  | 230 | C0 |
| ATOM 6091   | O ALA B 191   | -66.813 | 8.578  | 20.235 | 1.00 | 49.50 |     | O0 |
| ANISOU 6091 | O ALA B 191   | 5440    | 7840   | 5530   | 1860 | -310  | 250 | O0 |
| ATOM 6092   | CB ALA B 191  | -69.417 | 8.925  | 21.996 | 1.00 | 54.47 |     | C0 |
| ANISOU 6092 | CB ALA B 191  | 5650    | 8830   | 6210   | 2270 | -160  | 270 | C0 |
| ATOM 6093   | H ALA B 191   | -69.126 | 10.572 | 20.226 | 1.00 | 57.29 |     | H0 |
| ANISOU 6093 | H ALA B 191   | 6320    | 9030   | 6410   | 2550 | -300  | 380 | H0 |
| ATOM 6094   | HA ALA B 191  | -67.981 | 10.233 | 22.651 | 1.00 | 53.49 |     | H0 |
| ANISOU 6094 | HA ALA B 191  | 6040    | 8260   | 6020   | 2320 | -70   | 270 | H0 |
| ATOM 6095   | HB1 ALA B 191 | -69.278 | 8.303  | 22.729 | 1.00 | 53.66 |     | H0 |
| ANISOU 6095 | HB1 ALA B 191 | 5500    | 8730   | 6160   | 2130 | -90   | 230 | H0 |
| ATOM 6096   | HB2 ALA B 191 | -70.174 | 9.500  | 22.199 | 1.00 | 56.19 |     | H0 |
| ANISOU 6096 | HB2 ALA B 191 | 5810    | 9130   | 6410   | 2490 | -130  | 310 | H0 |
| ATOM 6097   | HB3 ALA B 191 | -69.601 | 8.427  | 21.181 | 1.00 | 54.62 |     | H0 |
| ANISOU 6097 | HB3 ALA B 191 | 5540    | 8980   | 6230   | 2190 | -260  | 280 | H0 |
| ATOM 6098   | N TYR B 192   | -66.143 | 8.556  | 22.420 | 1.00 | 47.78 |     | N0 |
| ANISOU 6098 | N TYR B 192   | 5360    | 7420   | 5380   | 1780 | -110  | 170 | N0 |
| ATOM 6099   | CA TYR B 192  | -65.030 | 7.577  | 22.310 | 1.00 | 44.99 |     | C0 |

|                           |         |        |        |      |       |     |    |
|---------------------------|---------|--------|--------|------|-------|-----|----|
| ANISOU 6099 CA TYR B 192  | 5040    | 6990   | 5070   | 1480 | -130  | 130 | C0 |
| ATOM 6100 C TYR B 192     | -65.397 | 6.341  | 23.136 | 1.00 | 44.20 |     | C0 |
| ANISOU 6100 C TYR B 192   | 4730    | 7020   | 5040   | 1330 | -80   | 70  | C0 |
| ATOM 6101 O TYR B 192     | -66.085 | 6.485  | 24.178 | 1.00 | 45.22 |     | O0 |
| ANISOU 6101 O TYR B 192   | 4790    | 7210   | 5190   | 1440 | 10    | 70  | O0 |
| ATOM 6102 CB TYR B 192    | -63.704 | 8.217  | 22.730 | 1.00 | 43.77 |     | C0 |
| ANISOU 6102 CB TYR B 192  | 5180    | 6560   | 4890   | 1420 | -90   | 110 | C0 |
| ATOM 6103 CG TYR B 192    | -63.114 | 9.135  | 21.688 | 1.00 | 44.12 |     | C0 |
| ANISOU 6103 CG TYR B 192  | 5430    | 6460   | 4870   | 1470 | -150  | 170 | C0 |
| ATOM 6104 CD1 TYR B 192   | -63.579 | 10.431 | 21.526 | 1.00 | 45.70 |     | C0 |
| ANISOU 6104 CD1 TYR B 192 | 5780    | 6580   | 5000   | 1710 | -140  | 220 | C0 |
| ATOM 6105 CD2 TYR B 192   | -62.103 | 8.705  | 20.844 | 1.00 | 42.97 |     | C0 |
| ANISOU 6105 CD2 TYR B 192 | 5340    | 6260   | 4720   | 1280 | -190  | 170 | C0 |
| ATOM 6106 CE1 TYR B 192   | -63.051 | 11.278 | 20.566 | 1.00 | 46.13 |     | C0 |
| ANISOU 6106 CE1 TYR B 192 | 6040    | 6500   | 4990   | 1750 | -180  | 280 | C0 |
| ATOM 6107 CE2 TYR B 192   | -61.562 | 9.539  | 19.877 | 1.00 | 43.44 |     | C0 |
| ANISOU 6107 CE2 TYR B 192 | 5590    | 6200   | 4720   | 1320 | -230  | 230 | C0 |
| ATOM 6108 CZ TYR B 192    | -62.038 | 10.830 | 19.736 | 1.00 | 45.14 |     | C0 |
| ANISOU 6108 CZ TYR B 192  | 5960    | 6320   | 4870   | 1550 | -220  | 290 | C0 |
| ATOM 6109 OH TYR B 192    | -61.511 | 11.654 | 18.782 | 1.00 | 46.30 |     | O0 |
| ANISOU 6109 OH TYR B 192  | 6310    | 6340   | 4950   | 1580 | -250  | 360 | O0 |
| ATOM 6110 H TYR B 192     | -66.208 | 8.906  | 23.259 | 1.00 | 48.10 |     | H0 |
| ANISOU 6110 H TYR B 192   | 5460    | 7390   | 5420   | 1850 | -40   | 160 | H0 |
| ATOM 6111 HA TYR B 192    | -64.953 | 7.300  | 21.362 | 1.00 | 44.96 |     | H0 |
| ANISOU 6111 HA TYR B 192  | 5000    | 7040   | 5050   | 1430 | -210  | 140 | H0 |
| ATOM 6112 HB2 TYR B 192   | -63.850 | 8.725  | 23.555 | 1.00 | 44.27 |     | H0 |
| ANISOU 6112 HB2 TYR B 192 | 5320    | 6550   | 4950   | 1510 | -30   | 110 | H0 |
| ATOM 6113 HB3 TYR B 192   | -63.061 | 7.503  | 22.926 | 1.00 | 42.51 |     | H0 |
| ANISOU 6113 HB3 TYR B 192 | 5010    | 6370   | 4770   | 1240 | -80   | 80  | H0 |
| ATOM 6114 HD1 TYR B 192   | -64.270 | 10.745 | 22.086 | 1.00 | 46.70 |     | H0 |
| ANISOU 6114 HD1 TYR B 192 | 5870    | 6750   | 5130   | 1860 | -100  | 220 | H0 |
| ATOM 6115 HD2 TYR B 192   | -61.772 | 7.826  | 20.931 | 1.00 | 41.89 |     | H0 |
| ANISOU 6115 HD2 TYR B 192 | 5120    | 6170   | 4630   | 1130 | -200  | 130 | H0 |
| ATOM 6116 HE1 TYR B 192   | -63.381 | 12.156 | 20.475 | 1.00 | 47.52 |     | H0 |
| ANISOU 6116 HE1 TYR B 192 | 6330    | 6610   | 5120   | 1930 | -170  | 330 | H0 |
| ATOM 6117 HE2 TYR B 192   | -60.872 | 9.227  | 19.315 | 1.00 | 42.71 |     | H0 |
| ANISOU 6117 HE2 TYR B 192 | 5530    | 6080   | 4620   | 1190 | -250  | 230 | H0 |
| ATOM 6118 N GLU B 193     | -64.993 | 5.161  | 22.662 | 1.00 | 41.91 |     | N0 |
| ANISOU 6118 N GLU B 193   | 4350    | 6780   | 4790   | 1110 | -130  | 40  | N0 |
| ATOM 6119 CA GLU B 193    | -65.336 | 3.860  | 23.289 | 1.00 | 41.51 |     | C0 |
| ANISOU 6119 CA GLU B 193  | 4120    | 6850   | 4810   | 940  | -90   | 0   | C0 |
| ATOM 6120 C GLU B 193     | -64.073 | 3.209  | 23.866 | 1.00 | 39.68 |     | C0 |
| ANISOU 6120 C GLU B 193   | 4030    | 6450   | 4600   | 750  | -50   | -50 | C0 |
| ATOM 6121 O GLU B 193     | -62.986 | 3.412  | 23.309 | 1.00 | 38.19 |     | O0 |
| ANISOU 6121 O GLU B 193   | 4000    | 6120   | 4390   | 690  | -90   | -50 | O0 |
| ATOM 6122 CB GLU B 193    | -66.032 | 2.945  | 22.282 | 1.00 | 41.53 |     | C0 |
| ANISOU 6122 CB GLU B 193  | 3900    | 7050   | 4830   | 840  | -190  | -10 | C0 |
| ATOM 6123 CG GLU B 193    | -67.435 | 3.400  | 21.932 | 1.00 | 43.50 |     | C0 |
| ANISOU 6123 CG GLU B 193  | 3940    | 7520   | 5070   | 1020 | -230  | 30  | C0 |
| ATOM 6124 CD GLU B 193    | -68.227 | 2.420  | 21.087 | 1.00 | 44.17 |     | C0 |
| ANISOU 6124 CD GLU B 193  | 3780    | 7830   | 5180   | 890  | -340  | 10  | C0 |
| ATOM 6125 OE1 GLU B 193   | -67.693 | 1.339  | 20.805 | 1.00 | 42.71 |     | O0 |
| ANISOU 6125 OE1 GLU B 193 | 3610    | 7600   | 5020   | 650  | -370  | -40 | O0 |
| ATOM 6126 OE2 GLU B 193   | -69.385 | 2.734  | 20.729 | 1.00 | 46.64 |     | O0 |



|                           |         |        |        |      |       |      |    |
|---------------------------|---------|--------|--------|------|-------|------|----|
| ANISOU 6126 OE2 GLU B 193 | 3880    | 8350   | 5480   | 1020 | -400  | 40   | O0 |
| ATOM 6127 H GLU B 193     | -64.475 | 5.084  | 21.917 | 1.00 | 41.65 |      | H0 |
| ANISOU 6127 H GLU B 193   | 4380    | 6710   | 4740   | 1040 | -190  | 40   | H0 |
| ATOM 6128 HA GLU B 193    | -65.958 | 4.034  | 24.030 | 1.00 | 42.21 |      | H0 |
| ANISOU 6128 HA GLU B 193  | 4130    | 6990   | 4910   | 1030 | -20   | 0    | H0 |
| ATOM 6129 HB2 GLU B 193   | -65.493 | 2.908  | 21.465 | 1.00 | 41.09 |      | H0 |
| ANISOU 6129 HB2 GLU B 193 | 3930    | 6940   | 4750   | 790  | -260  | -20  | H0 |
| ATOM 6130 HB3 GLU B 193   | -66.075 | 2.042  | 22.659 | 1.00 | 41.28 |      | H0 |
| ANISOU 6130 HB3 GLU B 193 | 3790    | 7050   | 4850   | 690  | -160  | -40  | H0 |
| ATOM 6131 HG2 GLU B 193   | -67.932 | 3.565  | 22.762 | 1.00 | 44.11 |      | H0 |
| ANISOU 6131 HG2 GLU B 193 | 3950    | 7640   | 5170   | 1090 | -150  | 40   | H0 |
| ATOM 6132 HG3 GLU B 193   | -67.380 | 4.251  | 21.448 | 1.00 | 43.91 |      | H0 |
| ANISOU 6132 HG3 GLU B 193 | 4080    | 7530   | 5070   | 1160 | -270  | 60   | H0 |
| ATOM 6133 N ASP B 194     | -64.230 | 2.467  | 24.965 | 1.00 | 40.08 |      | N0 |
| ANISOU 6133 N ASP B 194   | 4010    | 6520   | 4700   | 660  | 40    | -70  | N0 |
| ATOM 6134 CA ASP B 194    | -63.145 | 1.684  | 25.610 | 1.00 | 39.07 |      | C0 |
| ANISOU 6134 CA ASP B 194  | 3990    | 6260   | 4590   | 490  | 80    | -110 | C0 |
| ATOM 6135 C ASP B 194     | -63.729 | 0.365  | 26.124 | 1.00 | 39.18 |      | C0 |
| ANISOU 6135 C ASP B 194   | 3840    | 6390   | 4660   | 350  | 130   | -120 | C0 |
| ATOM 6136 O ASP B 194     | -64.954 | 0.302  | 26.353 | 1.00 | 40.96 |      | O0 |
| ANISOU 6136 O ASP B 194   | 3880    | 6780   | 4910   | 410  | 170   | -110 | O0 |
| ATOM 6137 CB ASP B 194    | -62.467 | 2.497  | 26.716 | 1.00 | 39.36 |      | C0 |
| ANISOU 6137 CB ASP B 194  | 4220    | 6140   | 4590   | 570  | 150   | -110 | C0 |
| ATOM 6138 CG ASP B 194    | -63.372 | 2.809  | 27.901 | 1.00 | 41.65 |      | C0 |
| ANISOU 6138 CG ASP B 194  | 4460    | 6490   | 4870   | 700  | 260   | -100 | C0 |
| ATOM 6139 OD1 ASP B 194   | -63.664 | 1.872  | 28.679 | 1.00 | 42.32 |      | O0 |
| ANISOU 6139 OD1 ASP B 194 | 4460    | 6640   | 4990   | 610  | 330   | -110 | O0 |
| ATOM 6140 OD2 ASP B 194   | -63.795 | 3.980  | 28.025 | 1.00 | 43.36 |      | O0 |
| ANISOU 6140 OD2 ASP B 194 | 4750    | 6690   | 5050   | 900  | 280   | -80  | O0 |
| ATOM 6141 H ASP B 194     | -65.031 | 2.399  | 25.394 | 1.00 | 40.98 |      | H0 |
| ANISOU 6141 H ASP B 194   | 4010    | 6740   | 4830   | 710  | 80    | -60  | H0 |
| ATOM 6142 HA ASP B 194    | -62.468 | 1.476  | 24.924 | 1.00 | 38.31 |      | H0 |
| ANISOU 6142 HA ASP B 194  | 3950    | 6120   | 4490   | 410  | 30    | -120 | H0 |
| ATOM 6143 HB2 ASP B 194   | -61.691 | 2.001  | 27.046 | 1.00 | 38.48 |      | H0 |
| ANISOU 6143 HB2 ASP B 194 | 4180    | 5950   | 4490   | 460  | 160   | -130 | H0 |
| ATOM 6144 HB3 ASP B 194   | -62.151 | 3.344  | 26.340 | 1.00 | 39.52 |      | H0 |
| ANISOU 6144 HB3 ASP B 194 | 4350    | 6090   | 4580   | 640  | 120   | -100 | H0 |
| ATOM 6145 N VAL B 195     | -62.884 | -0.657 | 26.265 | 1.00 | 38.25 |      | N0 |
| ANISOU 6145 N VAL B 195   | 3780    | 6190   | 4560   | 180  | 140   | -150 | N0 |
| ATOM 6146 CA VAL B 195    | -63.180 | -1.864 | 27.087 | 1.00 | 38.16 |      | C0 |
| ANISOU 6146 CA VAL B 195  | 3700    | 6210   | 4590   | 50   | 210   | -160 | C0 |
| ATOM 6147 C VAL B 195     | -62.418 | -1.695 | 28.404 | 1.00 | 37.02 |      | C0 |
| ANISOU 6147 C VAL B 195   | 3710    | 5940   | 4420   | 80   | 300   | -160 | C0 |
| ATOM 6148 O VAL B 195     | -61.192 | -1.458 | 28.355 | 1.00 | 35.29 |      | O0 |
| ANISOU 6148 O VAL B 195   | 3660    | 5580   | 4170   | 60   | 260   | -180 | O0 |
| ATOM 6149 CB VAL B 195    | -62.835 | -3.185 | 26.371 | 1.00 | 38.27 |      | C0 |
| ANISOU 6149 CB VAL B 195  | 3690    | 6220   | 4630   | -150 | 160   | -190 | C0 |
| ATOM 6150 CG1 VAL B 195   | -63.063 | -4.393 | 27.275 | 1.00 | 38.89 |      | C0 |
| ANISOU 6150 CG1 VAL B 195 | 3740    | 6290   | 4750   | -290 | 250   | -200 | C0 |
| ATOM 6151 CG2 VAL B 195   | -63.632 | -3.344 | 25.083 | 1.00 | 39.51 |      | C0 |
| ANISOU 6151 CG2 VAL B 195 | 3700    | 6510   | 4800   | -180 | 60    | -210 | C0 |
| ATOM 6152 H VAL B 195     | -62.066 | -0.679 | 25.864 | 1.00 | 37.27 |      | H0 |
| ANISOU 6152 H VAL B 195   | 3760    | 5980   | 4420   | 140  | 100   | -160 | H0 |
| ATOM 6153 HA VAL B 195    | -64.132 | -1.868 | 27.285 | 1.00 | 39.35 |      | H0 |

|                            |         |        |        |      |       |      |    |
|----------------------------|---------|--------|--------|------|-------|------|----|
| ANISOU 6153 HA VAL B 195   | 3710    | 6480   | 4760   | 80   | 250   | -150 | H0 |
| ATOM 6154 HB VAL B 195     | -61.875 | -3.156 | 26.134 | 1.00 | 37.25 |      | H0 |
| ANISOU 6154 HB VAL B 195   | 3690    | 5980   | 4480   | -160 | 140   | -210 | H0 |
| ATOM 6155 HG11 VAL B 195   | -62.339 | -4.458 | 27.921 | 1.00 | 38.01 |      | H0 |
| ANISOU 6155 HG11 VAL B 195 | 3740    | 6080   | 4620   | -280 | 290   | -190 | H0 |
| ATOM 6156 HG12 VAL B 195   | -63.088 | -5.203 | 26.736 | 1.00 | 38.90 |      | H0 |
| ANISOU 6156 HG12 VAL B 195 | 3710    | 6300   | 4770   | -410 | 220   | -220 | H0 |
| ATOM 6157 HG13 VAL B 195   | -63.909 | -4.292 | 27.745 | 1.00 | 39.78 |      | H0 |
| ANISOU 6157 HG13 VAL B 195 | 3740    | 6500   | 4880   | -260 | 310   | -180 | H0 |
| ATOM 6158 HG21 VAL B 195   | -64.582 | -3.378 | 25.290 | 1.00 | 40.58 |      | H0 |
| ANISOU 6158 HG21 VAL B 195 | 3690    | 6760   | 4960   | -170 | 80    | -190 | H0 |
| ATOM 6159 HG22 VAL B 195   | -63.368 | -4.168 | 24.637 | 1.00 | 39.21 |      | H0 |
| ANISOU 6159 HG22 VAL B 195 | 3680    | 6450   | 4770   | -310 | 30    | -230 | H0 |
| ATOM 6160 HG23 VAL B 195   | -63.456 | -2.589 | 24.496 | 1.00 | 39.31 |      | H0 |
| ANISOU 6160 HG23 VAL B 195 | 3720    | 6480   | 4740   | -90  | 10    | -200 | H0 |
| ATOM 6161 N GLU B 196      | -63.143 | -1.761 | 29.522 | 1.00 | 37.67 |      | N0 |
| ANISOU 6161 N GLU B 196    | 3740    | 6080   | 4500   | 120  | 410   | -150 | N0 |
| ATOM 6162 CA GLU B 196     | -62.589 | -1.724 | 30.901 | 1.00 | 37.55 |      | C0 |
| ANISOU 6162 CA GLU B 196   | 3870    | 5960   | 4440   | 150  | 500   | -140 | C0 |
| ATOM 6163 C GLU B 196      | -62.475 | -3.170 | 31.383 | 1.00 | 35.98 |      | C0 |
| ANISOU 6163 C GLU B 196    | 3650    | 5750   | 4270   | -20  | 550   | -140 | C0 |
| ATOM 6164 O GLU B 196      | -63.525 | -3.829 | 31.517 | 1.00 | 36.21 |      | O0 |
| ANISOU 6164 O GLU B 196    | 3520    | 5900   | 4340   | -80  | 620   | -120 | O0 |
| ATOM 6165 CB GLU B 196     | -63.486 | -0.894 | 31.825 | 1.00 | 40.16 |      | C0 |
| ANISOU 6165 CB GLU B 196   | 4170    | 6350   | 4730   | 320  | 600   | -120 | C0 |
| ATOM 6166 CG GLU B 196     | -62.921 | -0.707 | 33.226 | 1.00 | 41.70 |      | C0 |
| ANISOU 6166 CG GLU B 196   | 4550    | 6440   | 4860   | 370  | 680   | -130 | C0 |
| ATOM 6167 CD GLU B 196     | -63.860 | -0.022 | 34.207 | 1.00 | 45.11 |      | C0 |
| ANISOU 6167 CD GLU B 196   | 4960    | 6940   | 5240   | 540  | 800   | -120 | C0 |
| ATOM 6168 OE1 GLU B 196    | -65.092 | -0.078 | 33.999 | 1.00 | 48.44 |      | O0 |
| ANISOU 6168 OE1 GLU B 196  | 5180    | 7530   | 5700   | 590  | 860   | -80  | O0 |
| ATOM 6169 OE2 GLU B 196    | -63.361 | 0.572  | 35.179 | 1.00 | 48.46 |      | O0 |
| ANISOU 6169 OE2 GLU B 196  | 5580    | 7260   | 5580   | 630  | 840   | -140 | O0 |
| ATOM 6170 H GLU B 196      | -64.051 | -1.835 | 29.505 | 1.00 | 38.83 |      | H0 |
| ANISOU 6170 H GLU B 196    | 3750    | 6340   | 4670   | 140  | 440   | -130 | H0 |
| ATOM 6171 HA GLU B 196     | -61.693 | -1.319 | 30.872 | 1.00 | 36.60 |      | H0 |
| ANISOU 6171 HA GLU B 196   | 3880    | 5730   | 4290   | 160  | 450   | -160 | H0 |
| ATOM 6172 HB2 GLU B 196    | -63.623 | -0.013 | 31.418 | 1.00 | 40.50 |      | H0 |
| ANISOU 6172 HB2 GLU B 196  | 4230    | 6400   | 4760   | 430  | 560   | -130 | H0 |
| ATOM 6173 HB3 GLU B 196    | -64.358 | -1.333 | 31.889 | 1.00 | 41.22 |      | H0 |
| ANISOU 6173 HB3 GLU B 196  | 4160    | 6610   | 4900   | 300  | 650   | -100 | H0 |
| ATOM 6174 HG2 GLU B 196    | -62.681 | -1.584 | 33.592 | 1.00 | 41.40 |      | H0 |
| ANISOU 6174 HG2 GLU B 196  | 4510    | 6390   | 4830   | 260  | 710   | -130 | H0 |
| ATOM 6175 HG3 GLU B 196    | -62.097 | -0.178 | 33.167 | 1.00 | 40.96 |      | H0 |
| ANISOU 6175 HG3 GLU B 196  | 4590    | 6240   | 4730   | 390  | 620   | -160 | H0 |
| ATOM 6176 N VAL B 197      | -61.245 | -3.644 | 31.582 | 1.00 | 33.87 |      | N0 |
| ANISOU 6176 N VAL B 197    | 3540    | 5350   | 3980   | -90  | 520   | -160 | N0 |
| ATOM 6177 CA VAL B 197     | -60.938 | -5.017 | 32.074 | 1.00 | 33.69 |      | C0 |
| ANISOU 6177 CA VAL B 197   | 3550    | 5280   | 3970   | -220 | 570   | -150 | C0 |
| ATOM 6178 C VAL B 197      | -60.589 | -4.935 | 33.563 | 1.00 | 33.71 |      | C0 |
| ANISOU 6178 C VAL B 197    | 3680    | 5220   | 3900   | -160 | 660   | -130 | C0 |
| ATOM 6179 O VAL B 197      | -59.583 | -4.270 | 33.901 | 1.00 | 33.34 |      | O0 |
| ANISOU 6179 O VAL B 197    | 3780    | 5090   | 3800   | -90  | 610   | -150 | O0 |
| ATOM 6180 CB VAL B 197     | -59.793 | -5.650 | 31.272 | 1.00 | 32.61 |      | C0 |

|                            |         |        |        |      |       |      |    |
|----------------------------|---------|--------|--------|------|-------|------|----|
| ANISOU 6180 CB VAL B 197   | 3490    | 5050   | 3840   | -310 | 480   | -170 | C0 |
| ATOM 6181 CG1 VAL B 197    | -59.630 | -7.115 | 31.627 | 1.00 | 32.74 |      | C0 |
| ANISOU 6181 CG1 VAL B 197  | 3550    | 5010   | 3870   | -440 | 540   | -160 | C0 |
| ATOM 6182 CG2 VAL B 197    | -59.997 | -5.465 | 29.772 | 1.00 | 33.12 |      | C0 |
| ANISOU 6182 CG2 VAL B 197  | 3470    | 5170   | 3940   | -340 | 390   | -190 | C0 |
| ATOM 6183 H VAL B 197      | -60.498 | -3.146 | 31.426 | 1.00 | 33.37 |      | H0 |
| ANISOU 6183 H VAL B 197    | 3570    | 5220   | 3900   | -50  | 470   | -170 | H0 |
| ATOM 6184 HA VAL B 197     | -61.733 | -5.569 | 31.969 | 1.00 | 34.51 |      | H0 |
| ANISOU 6184 HA VAL B 197   | 3540    | 5460   | 4110   | -290 | 610   | -130 | H0 |
| ATOM 6185 HB VAL B 197     | -58.959 | -5.183 | 31.524 | 1.00 | 32.04 |      | H0 |
| ANISOU 6185 HB VAL B 197   | 3520    | 4910   | 3740   | -260 | 460   | -180 | H0 |
| ATOM 6186 HG11 VAL B 197   | -59.261 | -7.193 | 32.524 | 1.00 | 32.71 |      | H0 |
| ANISOU 6186 HG11 VAL B 197 | 3630    | 4960   | 3830   | -410 | 580   | -140 | H0 |
| ATOM 6187 HG12 VAL B 197   | -59.026 | -7.538 | 30.993 | 1.00 | 32.23 |      | H0 |
| ANISOU 6187 HG12 VAL B 197 | 3530    | 4900   | 3820   | -490 | 480   | -170 | H0 |
| ATOM 6188 HG13 VAL B 197   | -60.495 | -7.556 | 31.594 | 1.00 | 33.65 |      | H0 |
| ANISOU 6188 HG13 VAL B 197 | 3570    | 5190   | 4020   | -500 | 580   | -150 | H0 |
| ATOM 6189 HG21 VAL B 197   | -60.922 | -5.661 | 29.543 | 1.00 | 33.76 |      | H0 |
| ANISOU 6189 HG21 VAL B 197 | 3440    | 5340   | 4060   | -370 | 400   | -190 | H0 |
| ATOM 6190 HG22 VAL B 197   | -59.410 | -6.069 | 29.287 | 1.00 | 32.46 |      | H0 |
| ANISOU 6190 HG22 VAL B 197 | 3430    | 5030   | 3870   | -410 | 350   | -210 | H0 |
| ATOM 6191 HG23 VAL B 197   | -59.791 | -4.547 | 29.526 | 1.00 | 32.64 |      | H0 |
| ANISOU 6191 HG23 VAL B 197 | 3430    | 5100   | 3870   | -260 | 350   | -200 | H0 |
| ATOM 6192 N SER B 198      | -61.396 | -5.574 | 34.411 | 1.00 | 34.06 |      | N0 |
| ANISOU 6192 N SER B 198    | 3680    | 5320   | 3940   | -190 | 780   | -90  | N0 |
| ATOM 6193 CA SER B 198     | -61.235 | -5.597 | 35.889 | 1.00 | 34.57 |      | C0 |
| ANISOU 6193 CA SER B 198   | 3870    | 5340   | 3930   | -130 | 880   | -70  | C0 |
| ATOM 6194 C SER B 198      | -60.587 | -6.922 | 36.297 | 1.00 | 34.36 |      | C0 |
| ANISOU 6194 C SER B 198    | 3940    | 5220   | 3890   | -240 | 900   | -40  | C0 |
| ATOM 6195 O SER B 198      | -61.278 | -7.960 | 36.245 | 1.00 | 35.22 |      | O0 |
| ANISOU 6195 O SER B 198    | 3970    | 5370   | 4040   | -370 | 980   | -10  | O0 |
| ATOM 6196 CB SER B 198     | -62.550 | -5.375 | 36.594 | 1.00 | 36.36 |      | C0 |
| ANISOU 6196 CB SER B 198   | 3990    | 5690   | 4140   | -70  | 1020  | -30  | C0 |
| ATOM 6197 OG SER B 198     | -63.052 | -4.071 | 36.323 | 1.00 | 36.74 |      | O0 |
| ANISOU 6197 OG SER B 198   | 3970    | 5810   | 4180   | 80   | 1000  | -50  | O0 |
| ATOM 6198 H SER B 198      | -62.121 | -6.054 | 34.138 | 1.00 | 34.95 |      | H0 |
| ANISOU 6198 H SER B 198    | 3670    | 5500   | 4100   | -260 | 810   | -80  | H0 |
| ATOM 6199 HA SER B 198     | -60.619 | -4.859 | 36.143 | 1.00 | 34.09 |      | H0 |
| ANISOU 6199 HA SER B 198   | 3910    | 5230   | 3820   | -40  | 840   | -90  | H0 |
| ATOM 6200 HB2 SER B 198    | -63.200 | -6.047 | 36.292 | 1.00 | 37.00 |      | H0 |
| ANISOU 6200 HB2 SER B 198  | 3940    | 5840   | 4280   | -170 | 1060  | -10  | H0 |
| ATOM 6201 HB3 SER B 198    | -62.424 | -5.484 | 37.564 | 1.00 | 36.72 |      | H0 |
| ANISOU 6201 HB3 SER B 198  | 4130    | 5700   | 4120   | -30  | 1090  | -10  | H0 |
| ATOM 6202 N LEU B 199      | -59.301 | -6.868 | 36.653 | 1.00 | 33.25 |      | N0 |
| ANISOU 6202 N LEU B 199    | 3970    | 4980   | 3690   | -210 | 840   | -60  | N0 |
| ATOM 6203 CA LEU B 199     | -58.486 | -8.021 | 37.098 | 1.00 | 33.70 |      | C0 |
| ANISOU 6203 CA LEU B 199   | 4150    | 4940   | 3720   | -270 | 840   | -30  | C0 |
| ATOM 6204 C LEU B 199      | -58.517 | -8.065 | 38.629 | 1.00 | 34.09 |      | C0 |
| ANISOU 6204 C LEU B 199    | 4320    | 4970   | 3660   | -190 | 940   | 10   | C0 |
| ATOM 6205 O LEU B 199      | -57.834 | -7.241 | 39.255 | 1.00 | 33.60 |      | O0 |
| ANISOU 6205 O LEU B 199    | 4370    | 4880   | 3510   | -80  | 890   | -10  | O0 |
| ATOM 6206 CB LEU B 199     | -57.062 | -7.850 | 36.559 | 1.00 | 33.67 |      | C0 |
| ANISOU 6206 CB LEU B 199   | 4220    | 4860   | 3710   | -250 | 710   | -60  | C0 |
| ATOM 6207 CG LEU B 199     | -56.020 | -8.839 | 37.080 | 1.00 | 34.81 |      | C0 |

|                            |         |         |        |      |       |     |    |
|----------------------------|---------|---------|--------|------|-------|-----|----|
| ANISOU 6207 CG LEU B 199   | 4500    | 4920    | 3800   | -250 | 700   | -30 | C0 |
| ATOM 6208 CD1 LEU B 199    | -56.370 | -10.267 | 36.677 | 1.00 | 35.81 |     | C0 |
| ANISOU 6208 CD1 LEU B 199  | 4620    | 5000    | 3980   | -370 | 760   | 0   | C0 |
| ATOM 6209 CD2 LEU B 199    | -54.635 | -8.459  | 36.576 | 1.00 | 34.64 |     | C0 |
| ANISOU 6209 CD2 LEU B 199  | 4510    | 4870    | 3780   | -220 | 560   | -60 | C0 |
| ATOM 6210 H LEU B 199      | -58.835 | -6.085  | 36.646 | 1.00 | 32.96 |     | H0 |
| ANISOU 6210 H LEU B 199    | 3980    | 4920    | 3630   | -140 | 780   | -80 | H0 |
| ATOM 6211 HA LEU B 199     | -58.882 | -8.849  | 36.740 | 1.00 | 34.07 |     | H0 |
| ANISOU 6211 HA LEU B 199   | 4150    | 4990    | 3810   | -360 | 880   | -10 | H0 |
| ATOM 6212 HB2 LEU B 199    | -57.094 | -7.923  | 35.584 | 1.00 | 33.22 |     | H0 |
| ANISOU 6212 HB2 LEU B 199  | 4090    | 4820    | 3710   | -300 | 660   | -80 | H0 |
| ATOM 6213 HB3 LEU B 199    | -56.760 | -6.946  | 36.775 | 1.00 | 33.40 |     | H0 |
| ANISOU 6213 HB3 LEU B 199  | 4220    | 4830    | 3640   | -170 | 660   | -80 | H0 |
| ATOM 6214 HG LEU B 199     | -56.012 | -8.791  | 38.065 | 1.00 | 35.33 |     | H0 |
| ANISOU 6214 HG LEU B 199   | 4650    | 4980    | 3800   | -200 | 740   | -10 | H0 |
| ATOM 6215 HD11 LEU B 199   | -57.170 | -10.553 | 37.153 | 1.00 | 36.49 |     | H0 |
| ANISOU 6215 HD11 LEU B 199 | 4700    | 5110    | 4060   | -400 | 850   | 30  | H0 |
| ATOM 6216 HD12 LEU B 199   | -55.631 | -10.858 | 36.902 | 1.00 | 35.61 |     | H0 |
| ANISOU 6216 HD12 LEU B 199 | 4690    | 4910    | 3920   | -350 | 740   | 20  | H0 |
| ATOM 6217 HD13 LEU B 199   | -56.534 | -10.303 | 35.718 | 1.00 | 35.30 |     | H0 |
| ANISOU 6217 HD13 LEU B 199 | 4480    | 4950    | 3980   | -420 | 720   | -30 | H0 |
| ATOM 6218 HD21 LEU B 199   | -54.628 | -8.474  | 35.604 | 1.00 | 33.91 |     | H0 |
| ANISOU 6218 HD21 LEU B 199 | 4350    | 4780    | 3750   | -260 | 530   | -80 | H0 |
| ATOM 6219 HD22 LEU B 199   | -53.981 | -9.095  | 36.915 | 1.00 | 34.48 |     | H0 |
| ANISOU 6219 HD22 LEU B 199 | 4570    | 4800    | 3730   | -200 | 550   | -40 | H0 |
| ATOM 6220 HD23 LEU B 199   | -54.410 | -7.565  | 36.888 | 1.00 | 34.25 |     | H0 |
| ANISOU 6220 HD23 LEU B 199 | 4480    | 4830    | 3700   | -160 | 520   | -80 | H0 |
| ATOM 6221 N ASN B 200      | -59.329 | -8.963  | 39.191 | 1.00 | 34.88 |     | N0 |
| ANISOU 6221 N ASN B 200    | 4410    | 5090    | 3750   | -260 | 1080  | 70  | N0 |
| ATOM 6222 CA ASN B 200     | -59.379 | -9.265  | 40.645 | 1.00 | 35.59 |     | C0 |
| ANISOU 6222 CA ASN B 200   | 4640    | 5150    | 3730   | -200 | 1190  | 120 | C0 |
| ATOM 6223 C ASN B 200      | -58.388 | -10.405 | 40.893 | 1.00 | 34.78 |     | C0 |
| ANISOU 6223 C ASN B 200    | 4690    | 4930    | 3590   | -240 | 1160  | 160 | C0 |
| ATOM 6224 O ASN B 200      | -58.622 | -11.513 | 40.383 | 1.00 | 34.90 |     | O0 |
| ANISOU 6224 O ASN B 200    | 4680    | 4900    | 3670   | -370 | 1200  | 190 | O0 |
| ATOM 6225 CB ASN B 200     | -60.806 | -9.588  | 41.096 | 1.00 | 37.43 |     | C0 |
| ANISOU 6225 CB ASN B 200   | 4770    | 5480    | 3980   | -250 | 1370  | 180 | C0 |
| ATOM 6226 CG ASN B 200     | -60.943 | -9.836  | 42.587 | 1.00 | 39.04 |     | C0 |
| ANISOU 6226 CG ASN B 200   | 5120    | 5660    | 4050   | -180 | 1510  | 250 | C0 |
| ATOM 6227 OD1 ASN B 200    | -61.865 | -10.524 | 43.014 | 1.00 | 40.25 |     | O0 |
| ANISOU 6227 OD1 ASN B 200  | 5230    | 5860    | 4210   | -260 | 1680  | 320 | O0 |
| ATOM 6228 ND2 ASN B 200    | -60.053 | -9.266  | 43.386 | 1.00 | 38.90 |     | N0 |
| ANISOU 6228 ND2 ASN B 200  | 5280    | 5600    | 3900   | -40  | 1450  | 220 | N0 |
| ATOM 6229 H ASN B 200      | -59.917 | -9.457  | 38.701 | 1.00 | 35.25 |     | H0 |
| ANISOU 6229 H ASN B 200    | 4360    | 5160    | 3870   | -350 | 1110  | 80  | H0 |
| ATOM 6230 HA ASN B 200     | -59.081 | -8.468  | 41.136 | 1.00 | 35.46 |     | H0 |
| ANISOU 6230 HA ASN B 200   | 4690    | 5140    | 3640   | -90  | 1160  | 100 | H0 |
| ATOM 6231 HB2 ASN B 200    | -61.389 | -8.843  | 40.846 | 1.00 | 37.58 |     | H0 |
| ANISOU 6231 HB2 ASN B 200  | 4680    | 5580    | 4020   | -210 | 1380  | 160 | H0 |
| ATOM 6232 HB3 ASN B 200    | -61.113 | -10.383 | 40.615 | 1.00 | 37.72 |     | H0 |
| ANISOU 6232 HB3 ASN B 200  | 4740    | 5500    | 4080   | -370 | 1400  | 200 | H0 |
| ATOM 6233 HD21 ASN B 200   | -59.586 | -9.759  | 43.951 | 1.00 | 39.11 |     | H0 |
| ANISOU 6233 HD21 ASN B 200 | 5430    | 5560    | 3860   | -30  | 1460  | 250 | H0 |
| ATOM 6234 HD22 ASN B 200   | -59.927 | -8.392  | 43.356 | 1.00 | 38.46 |     | H0 |

|             |                |         |         |        |      |       |     |    |
|-------------|----------------|---------|---------|--------|------|-------|-----|----|
| ANISOU 6234 | HD22 ASN B 200 | 5220    | 5560    | 3830   | 40   | 1400  | 180 | H0 |
| ATOM 6235   | N PHE B 201    | -57.294 | -10.119 | 41.595 | 1.00 | 34.24 |     | N0 |
| ANISOU 6235 | N PHE B 201    | 4780    | 4810    | 3420   | -130 | 1090  | 150 | N0 |
| ATOM 6236   | CA PHE B 201   | -56.172 | -11.059 | 41.833 | 1.00 | 34.50 |     | C0 |
| ANISOU 6236 | CA PHE B 201   | 4960    | 4750    | 3400   | -120 | 1030  | 190 | C0 |
| ATOM 6237   | C PHE B 201    | -55.633 | -10.855 | 43.252 | 1.00 | 35.70 |     | C0 |
| ANISOU 6237 | C PHE B 201    | 5280    | 4890    | 3390   | 10   | 1040  | 210 | C0 |
| ATOM 6238   | O PHE B 201    | -55.924 | -9.799  | 43.866 | 1.00 | 36.21 |     | O0 |
| ANISOU 6238 | O PHE B 201    | 5360    | 5010    | 3380   | 90   | 1040  | 180 | O0 |
| ATOM 6239   | CB PHE B 201   | -55.080 | -10.855 | 40.778 | 1.00 | 33.25 |     | C0 |
| ANISOU 6239 | CB PHE B 201   | 4750    | 4570    | 3310   | -120 | 870   | 130 | C0 |
| ATOM 6240   | CG PHE B 201   | -54.274 | -9.594  | 40.947 | 1.00 | 32.55 |     | C0 |
| ANISOU 6240 | CG PHE B 201   | 4670    | 4520    | 3170   | -30  | 740   | 70  | C0 |
| ATOM 6241   | CD1 PHE B 201  | -54.778 | -8.370  | 40.539 | 1.00 | 32.38 |     | C0 |
| ANISOU 6241 | CD1 PHE B 201  | 4560    | 4560    | 3190   | -20  | 720   | 20  | C0 |
| ATOM 6242   | CD2 PHE B 201  | -53.013 | -9.630  | 41.516 | 1.00 | 32.80 |     | C0 |
| ANISOU 6242 | CD2 PHE B 201  | 4810    | 4530    | 3120   | 50   | 640   | 80  | C0 |
| ATOM 6243   | CE1 PHE B 201  | -54.039 | -7.208  | 40.696 | 1.00 | 32.12 |     | C0 |
| ANISOU 6243 | CE1 PHE B 201  | 4560    | 4530    | 3110   | 40   | 600   | -40 | C0 |
| ATOM 6244   | CE2 PHE B 201  | -52.273 | -8.469  | 41.672 | 1.00 | 32.58 |     | C0 |
| ANISOU 6244 | CE2 PHE B 201  | 4790    | 4530    | 3050   | 100  | 510   | 20  | C0 |
| ATOM 6245   | CZ PHE B 201   | -52.784 | -7.261  | 41.257 | 1.00 | 32.37 |     | C0 |
| ANISOU 6245 | CZ PHE B 201   | 4690    | 4540    | 3070   | 90   | 500   | -40 | C0 |
| ATOM 6246   | H PHE B 201    | -57.153 | -9.307  | 41.984 | 1.00 | 34.31 |     | H0 |
| ANISOU 6246 | H PHE B 201    | 4820    | 4850    | 3370   | -50  | 1060  | 120 | H0 |
| ATOM 6247   | HA PHE B 201   | -56.514 | -11.986 | 41.760 | 1.00 | 35.11 |     | H0 |
| ANISOU 6247 | HA PHE B 201   | 5050    | 4790    | 3510   | -190 | 1110  | 230 | H0 |
| ATOM 6248   | HB2 PHE B 201  | -54.473 | -11.623 | 40.807 | 1.00 | 33.31 |     | H0 |
| ANISOU 6248 | HB2 PHE B 201  | 4830    | 4520    | 3300   | -120 | 850   | 160 | H0 |
| ATOM 6249   | HB3 PHE B 201  | -55.503 | -10.843 | 39.894 | 1.00 | 32.79 |     | H0 |
| ANISOU 6249 | HB3 PHE B 201  | 4590    | 4530    | 3340   | -190 | 870   | 110 | H0 |
| ATOM 6250   | HD1 PHE B 201  | -55.636 | -8.327  | 40.153 | 1.00 | 32.46 |     | H0 |
| ANISOU 6250 | HD1 PHE B 201  | 4480    | 4600    | 3250   | -60  | 780   | 20  | H0 |
| ATOM 6251   | HD2 PHE B 201  | -52.653 | -10.456 | 41.800 | 1.00 | 33.20 |     | H0 |
| ANISOU 6251 | HD2 PHE B 201  | 4930    | 4540    | 3140   | 60   | 650   | 120 | H0 |
| ATOM 6252   | HE1 PHE B 201  | -54.394 | -6.381  | 40.412 | 1.00 | 31.95 |     | H0 |
| ANISOU 6252 | HE1 PHE B 201  | 4490    | 4530    | 3110   | 50   | 590   | -80 | H0 |
| ATOM 6253   | HE2 PHE B 201  | -51.414 | -8.508  | 42.060 | 1.00 | 32.81 |     | H0 |
| ANISOU 6253 | HE2 PHE B 201  | 4880    | 4560    | 3020   | 140  | 430   | 20  | H0 |
| ATOM 6254   | HZ PHE B 201   | -52.280 | -6.470  | 41.367 | 1.00 | 32.17 |     | H0 |
| ANISOU 6254 | HZ PHE B 201   | 4690    | 4520    | 3010   | 110  | 410   | -80 | H0 |
| ATOM 6255   | N ARG B 202    | -54.888 | -11.838 | 43.760 | 1.00 | 36.52 |     | N0 |
| ANISOU 6255 | N ARG B 202    | 5530    | 4920    | 3430   | 40   | 1030  | 270 | N0 |
| ATOM 6256   | CA ARG B 202   | -54.266 | -11.777 | 45.108 | 1.00 | 38.50 |     | C0 |
| ANISOU 6256 | CA ARG B 202   | 5970    | 5160    | 3500   | 160  | 1010  | 300 | C0 |
| ATOM 6257   | C ARG B 202    | -52.948 | -12.551 | 45.122 | 1.00 | 38.89 |     | C0 |
| ANISOU 6257 | C ARG B 202    | 6110    | 5150    | 3510   | 220  | 900   | 330 | C0 |
| ATOM 6258   | O ARG B 202    | -52.774 | -13.450 | 44.284 | 1.00 | 37.56 |     | O0 |
| ANISOU 6258 | O ARG B 202    | 5910    | 4920    | 3440   | 160  | 900   | 350 | O0 |
| ATOM 6259   | CB ARG B 202   | -55.216 | -12.340 | 46.170 | 1.00 | 40.23 |     | C0 |
| ANISOU 6259 | CB ARG B 202   | 6290    | 5360    | 3630   | 170  | 1200  | 390 | C0 |
| ATOM 6260   | CG ARG B 202   | -55.374 | -13.853 | 46.136 | 1.00 | 40.93 |     | C0 |
| ANISOU 6260 | CG ARG B 202   | 6460    | 5350    | 3740   | 90   | 1310  | 480 | C0 |
| ATOM 6261   | CD ARG B 202   | -56.393 | -14.326 | 47.148 | 1.00 | 42.89 |     | C0 |

|                            |         |         |        |      |       |     |    |
|----------------------------|---------|---------|--------|------|-------|-----|----|
| ANISOU 6261 CD ARG B 202   | 6800    | 5590    | 3900   | 70   | 1520  | 580 | C0 |
| ATOM 6262 NE ARG B 202     | -56.655 | -15.757 | 47.046 | 1.00 | 43.77 |     | N0 |
| ANISOU 6262 NE ARG B 202   | 7000    | 5580    | 4050   | -30  | 1630  | 670 | N0 |
| ATOM 6263 CZ ARG B 202     | -57.695 | -16.384 | 47.589 | 1.00 | 45.10 |     | C0 |
| ANISOU 6263 CZ ARG B 202   | 7210    | 5730    | 4200   | -120 | 1840  | 760 | C0 |
| ATOM 6264 NH1 ARG B 202    | -58.602 | -15.715 | 48.281 | 1.00 | 45.70 |     | N0 |
| ANISOU 6264 NH1 ARG B 202  | 7230    | 5910    | 4220   | -100 | 1960  | 770 | N0 |
| ATOM 6265 NH2 ARG B 202    | -57.829 | -17.687 | 47.427 | 1.00 | 46.39 |     | N0 |
| ANISOU 6265 NH2 ARG B 202  | 7470    | 5760    | 4400   | -230 | 1930  | 840 | N0 |
| ATOM 6266 H ARG B 202      | -54.718 | -12.611 | 43.307 | 1.00 | 36.61 |     | H0 |
| ANISOU 6266 H ARG B 202    | 5550    | 4880    | 3490   | -10  | 1030  | 290 | H0 |
| ATOM 6267 HA ARG B 202     | -54.079 | -10.835 | 45.318 | 1.00 | 38.13 |     | H0 |
| ANISOU 6267 HA ARG B 202   | 5910    | 5160    | 3420   | 220  | 940   | 250 | H0 |
| ATOM 6268 HB2 ARG B 202    | -54.884 | -12.078 | 47.054 | 1.00 | 40.81 |     | H0 |
| ANISOU 6268 HB2 ARG B 202  | 6480    | 5450    | 3570   | 260  | 1180  | 400 | H0 |
| ATOM 6269 HB3 ARG B 202    | -56.098 | -11.929 | 46.048 | 1.00 | 40.29 |     | H0 |
| ANISOU 6269 HB3 ARG B 202  | 6210    | 5420    | 3680   | 130  | 1280  | 370 | H0 |
| ATOM 6270 HG2 ARG B 202    | -55.659 | -14.131 | 45.240 | 1.00 | 40.46 |     | H0 |
| ANISOU 6270 HG2 ARG B 202  | 6300    | 5280    | 3800   | -10  | 1310  | 470 | H0 |
| ATOM 6271 HG3 ARG B 202    | -54.513 | -14.279 | 46.327 | 1.00 | 41.08 |     | H0 |
| ANISOU 6271 HG3 ARG B 202  | 6580    | 5320    | 3700   | 160  | 1230  | 510 | H0 |
| ATOM 6272 HD2 ARG B 202    | -56.069 | -14.122 | 48.052 | 1.00 | 43.47 |     | H0 |
| ANISOU 6272 HD2 ARG B 202  | 7000    | 5670    | 3840   | 180  | 1510  | 600 | H0 |
| ATOM 6273 HD3 ARG B 202    | -57.230 | -13.834 | 47.011 | 1.00 | 42.88 |     | H0 |
| ANISOU 6273 HD3 ARG B 202  | 6690    | 5660    | 3950   | 30   | 1590  | 550 | H0 |
| ATOM 6274 HE ARG B 202     | -56.084 | -16.240 | 46.597 | 1.00 | 43.29 |     | H0 |
| ANISOU 6274 HE ARG B 202   | 6970    | 5460    | 4020   | -40  | 1560  | 670 | H0 |
| ATOM 6275 HH11 ARG B 202   | -58.522 | -14.850 | 48.395 | 1.00 | 45.27 |     | H0 |
| ANISOU 6275 HH11 ARG B 202 | 7130    | 5930    | 4130   | -20  | 1910  | 720 | H0 |
| ATOM 6276 HH12 ARG B 202   | -59.284 | -16.143 | 48.634 | 1.00 | 47.07 |     | H0 |
| ANISOU 6276 HH12 ARG B 202 | 7420    | 6080    | 4380   | -170 | 2110  | 840 | H0 |
| ATOM 6277 HH21 ARG B 202   | -57.228 | -18.137 | 46.965 | 1.00 | 45.84 |     | H0 |
| ANISOU 6277 HH21 ARG B 202 | 7440    | 5610    | 4360   | -230 | 1850  | 830 | H0 |
| ATOM 6278 HH22 ARG B 202   | -58.517 | -18.106 | 47.784 | 1.00 | 47.56 |     | H0 |
| ANISOU 6278 HH22 ARG B 202 | 7640    | 5890    | 4540   | -310 | 2070  | 900 | H0 |
| ATOM 6279 N LYS B 203      | -52.061 | -12.199 | 46.054 | 1.00 | 41.16 |     | N0 |
| ANISOU 6279 N LYS B 203    | 6520    | 5460    | 3660   | 340  | 790   | 330 | N0 |
| ATOM 6280 CA LYS B 203     | -50.932 | -13.061 | 46.493 | 1.00 | 43.66 |     | C0 |
| ANISOU 6280 CA LYS B 203   | 6960    | 5740    | 3890   | 440  | 720   | 390 | C0 |
| ATOM 6281 C LYS B 203      | -51.518 | -14.409 | 46.927 | 1.00 | 45.36 |     | C0 |
| ANISOU 6281 C LYS B 203    | 7320    | 5850    | 4070   | 430  | 890   | 500 | C0 |
| ATOM 6282 O LYS B 203      | -52.526 | -14.397 | 47.662 | 1.00 | 45.42 |     | O0 |
| ANISOU 6282 O LYS B 203    | 7390    | 5860    | 4010   | 410  | 1040  | 540 | O0 |
| ATOM 6283 CB LYS B 203     | -50.178 | -12.414 | 47.661 | 1.00 | 45.76 |     | C0 |
| ANISOU 6283 CB LYS B 203   | 7340    | 6070    | 3980   | 570  | 600   | 370 | C0 |
| ATOM 6284 CG LYS B 203     | -48.904 | -13.128 | 48.094 | 1.00 | 47.84 |     | C0 |
| ANISOU 6284 CG LYS B 203   | 7700    | 6330    | 4150   | 690  | 480   | 430 | C0 |
| ATOM 6285 CD LYS B 203     | -47.652 | -12.569 | 47.453 | 1.00 | 48.28 |     | C0 |
| ANISOU 6285 CD LYS B 203   | 7610    | 6470    | 4260   | 700  | 270   | 360 | C0 |
| ATOM 6286 CE LYS B 203     | -46.957 | -11.542 | 48.326 | 1.00 | 49.83 |     | C0 |
| ANISOU 6286 CE LYS B 203   | 7850    | 6760    | 4330   | 760  | 100   | 300 | C0 |
| ATOM 6287 NZ LYS B 203     | -46.115 | -12.192 | 49.361 | 1.00 | 52.26 |     | N0 |
| ANISOU 6287 NZ LYS B 203   | 8300    | 7100    | 4460   | 910  | 20    | 370 | N0 |
| ATOM 6288 H LYS B 203      | -52.098 | -11.395 | 46.482 | 1.00 | 41.24 |     | H0 |

|                           |         |         |        |      |       |     |    |
|---------------------------|---------|---------|--------|------|-------|-----|----|
| ANISOU 6288 H LYS B 203   | 6540    | 5520    | 3610   | 380  | 760   | 290 | H0 |
| ATOM 6289 HA LYS B 203    | -50.317 | -13.197 | 45.736 | 1.00 | 42.90 |     | H0 |
| ANISOU 6289 HA LYS B 203  | 6780    | 5640    | 3870   | 430  | 630   | 370 | H0 |
| ATOM 6290 HB2 LYS B 203   | -49.948 | -11.495 | 47.409 | 1.00 | 45.09 |     | H0 |
| ANISOU 6290 HB2 LYS B 203 | 7170    | 6040    | 3920   | 550  | 500   | 300 | H0 |
| ATOM 6291 HB3 LYS B 203   | -50.783 | -12.368 | 48.430 | 1.00 | 46.60 |     | H0 |
| ANISOU 6291 HB3 LYS B 203 | 7540    | 6170    | 3990   | 590  | 690   | 400 | H0 |
| ATOM 6292 HG2 LYS B 203   | -48.822 | -13.061 | 49.069 | 1.00 | 48.92 |     | H0 |
| ANISOU 6292 HG2 LYS B 203 | 7960    | 6490    | 4140   | 770  | 470   | 450 | H0 |
| ATOM 6293 HG3 LYS B 203   | -48.980 | -14.079 | 47.865 | 1.00 | 48.07 |     | H0 |
| ANISOU 6293 HG3 LYS B 203 | 7760    | 6290    | 4210   | 690  | 550   | 490 | H0 |
| ATOM 6294 HD2 LYS B 203   | -47.030 | -13.305 | 47.270 | 1.00 | 48.47 |     | H0 |
| ANISOU 6294 HD2 LYS B 203 | 7640    | 6480    | 4290   | 760  | 240   | 410 | H0 |
| ATOM 6295 HD3 LYS B 203   | -47.887 | -12.152 | 46.597 | 1.00 | 47.04 |     | H0 |
| ANISOU 6295 HD3 LYS B 203 | 7330    | 6320    | 4230   | 610  | 270   | 310 | H0 |
| ATOM 6296 HE2 LYS B 203   | -46.395 | -10.968 | 47.772 | 1.00 | 49.15 |     | H0 |
| ANISOU 6296 HE2 LYS B 203 | 7640    | 6730    | 4310   | 720  | -10   | 250 | H0 |
| ATOM 6297 HE3 LYS B 203   | -47.624 | -10.981 | 48.765 | 1.00 | 49.95 |     | H0 |
| ANISOU 6297 HE3 LYS B 203 | 7910    | 6770    | 4290   | 740  | 160   | 270 | H0 |
| ATOM 6298 HZ1 LYS B 203   | -46.642 | -12.609 | 49.969 | 1.00 | 52.78 |     | H0 |
| ANISOU 6298 HZ1 LYS B 203 | 8490    | 7120    | 4440   | 950  | 120   | 430 | H0 |
| ATOM 6299 HZ2 LYS B 203   | -45.611 | -11.568 | 49.784 | 1.00 | 52.50 |     | H0 |
| ANISOU 6299 HZ2 LYS B 203 | 8330    | 7200    | 4420   | 930  | -110  | 330 | H0 |
| ATOM 6300 HZ3 LYS B 203   | -45.568 | -12.803 | 48.975 | 1.00 | 52.03 |     | H0 |
| ANISOU 6300 HZ3 LYS B 203 | 8230    | 7070    | 4470   | 950  | -10   | 410 | H0 |
| ATOM 6301 N LYS B 204     | -50.921 | -15.518 | 46.483 | 1.00 | 46.27 |     | N0 |
| ANISOU 6301 N LYS B 204   | 7480    | 5890    | 4220   | 450  | 870   | 550 | N0 |
| ATOM 6302 CA LYS B 204    | -51.276 | -16.881 | 46.955 | 1.00 | 49.07 |     | C0 |
| ANISOU 6302 CA LYS B 204  | 8020    | 6110    | 4520   | 450  | 1020  | 670 | C0 |
| ATOM 6303 C LYS B 204     | -50.961 | -16.989 | 48.456 | 1.00 | 52.01 |     | C0 |
| ANISOU 6303 C LYS B 204   | 8600    | 6490    | 4670   | 600  | 1030  | 750 | C0 |
| ATOM 6304 O LYS B 204     | -49.997 | -16.345 | 48.921 | 1.00 | 50.57 |     | O0 |
| ANISOU 6304 O LYS B 204   | 8420    | 6400    | 4400   | 730  | 860   | 710 | O0 |
| ATOM 6305 CB LYS B 204    | -50.545 | -17.932 | 46.118 | 1.00 | 49.35 |     | C0 |
| ANISOU 6305 CB LYS B 204  | 8080    | 6040    | 4620   | 470  | 980   | 700 | C0 |
| ATOM 6306 CG LYS B 204    | -50.985 | -17.975 | 44.660 | 1.00 | 48.86 |     | C0 |
| ANISOU 6306 CG LYS B 204  | 7860    | 5960    | 4750   | 320  | 1000  | 630 | C0 |
| ATOM 6307 CD LYS B 204    | -50.568 | -19.219 | 43.910 | 1.00 | 49.34 |     | C0 |
| ANISOU 6307 CD LYS B 204  | 8010    | 5880    | 4860   | 320  | 1020  | 660 | C0 |
| ATOM 6308 CE LYS B 204    | -49.165 | -19.128 | 43.357 | 1.00 | 49.18 |     | C0 |
| ANISOU 6308 CE LYS B 204  | 7930    | 5900    | 4850   | 460  | 850   | 630 | C0 |
| ATOM 6309 NZ LYS B 204    | -48.999 | -19.993 | 42.166 | 1.00 | 49.01 |     | N0 |
| ANISOU 6309 NZ LYS B 204  | 7920    | 5770    | 4930   | 430  | 880   | 610 | N0 |
| ATOM 6310 H LYS B 204     | -50.255 | -15.502 | 45.862 | 1.00 | 45.73 |     | H0 |
| ANISOU 6310 H LYS B 204   | 7340    | 5830    | 4200   | 460  | 780   | 520 | H0 |
| ATOM 6311 HA LYS B 204    | -52.245 | -17.003 | 46.832 | 1.00 | 49.29 |     | H0 |
| ANISOU 6311 HA LYS B 204  | 8020    | 6110    | 4600   | 340  | 1150  | 680 | H0 |
| ATOM 6312 HB2 LYS B 204   | -49.583 | -17.747 | 46.152 | 1.00 | 49.27 |     | H0 |
| ANISOU 6312 HB2 LYS B 204 | 8060    | 6080    | 4570   | 580  | 850   | 680 | H0 |
| ATOM 6313 HB3 LYS B 204   | -50.697 | -18.813 | 46.520 | 1.00 | 50.65 |     | H0 |
| ANISOU 6313 HB3 LYS B 204 | 8400    | 6110    | 4730   | 490  | 1070  | 780 | H0 |
| ATOM 6314 HG2 LYS B 204   | -51.962 | -17.904 | 44.629 | 1.00 | 48.75 |     | H0 |
| ANISOU 6314 HG2 LYS B 204 | 7810    | 5940    | 4780   | 200  | 1100  | 620 | H0 |
| ATOM 6315 HG3 LYS B 204   | -50.618 | -17.190 | 44.200 | 1.00 | 47.56 |     | H0 |

|                           |         |         |        |      |       |      |    |
|---------------------------|---------|---------|--------|------|-------|------|----|
| ANISOU 6315 HG3 LYS B 204 | 7560    | 5880    | 4630   | 330  | 890   | 560  | H0 |
| ATOM 6316 HD2 LYS B 204   | -50.623 | -19.991 | 44.512 | 1.00 | 50.74 |      | H0 |
| ANISOU 6316 HD2 LYS B 204 | 8350    | 5960    | 4970   | 360  | 1090  | 740  | H0 |
| ATOM 6317 HD3 LYS B 204   | -51.193 | -19.369 | 43.168 | 1.00 | 49.06 |      | H0 |
| ANISOU 6317 HD3 LYS B 204 | 7910    | 5800    | 4930   | 190  | 1070  | 630  | H0 |
| ATOM 6318 HE2 LYS B 204   | -48.968 | -18.206 | 43.110 | 1.00 | 47.99 |      | H0 |
| ANISOU 6318 HE2 LYS B 204 | 7640    | 5870    | 4730   | 450  | 770   | 560  | H0 |
| ATOM 6319 HE3 LYS B 204   | -48.525 | -19.403 | 44.041 | 1.00 | 49.94 |      | H0 |
| ANISOU 6319 HE3 LYS B 204 | 8130    | 6000    | 4850   | 600  | 820   | 680  | H0 |
| ATOM 6320 HZ1 LYS B 204   | -49.269 | -20.837 | 42.359 | 1.00 | 50.07 |      | H0 |
| ANISOU 6320 HZ1 LYS B 204 | 8200    | 5780    | 5040   | 420  | 960   | 660  | H0 |
| ATOM 6321 HZ2 LYS B 204   | -48.127 | -20.010 | 41.918 | 1.00 | 48.91 |      | H0 |
| ANISOU 6321 HZ2 LYS B 204 | 7890    | 5790    | 4910   | 530  | 790   | 600  | H0 |
| ATOM 6322 HZ3 LYS B 204   | -49.497 | -19.671 | 41.480 | 1.00 | 48.21 |      | H0 |
| ANISOU 6322 HZ3 LYS B 204 | 7710    | 5690    | 4910   | 310  | 890   | 550  | H0 |
| ATOM 6323 N GLY B 205     | -51.767 | -17.762 | 49.189 | 1.00 | 56.08 |      | N0 |
| ANISOU 6323 N GLY B 205   | 9280    | 6920    | 5110   | 580  | 1210  | 850  | N0 |
| ATOM 6324 CA GLY B 205    | -51.611 | -17.980 | 50.640 | 1.00 | 60.92 |      | C0 |
| ANISOU 6324 CA GLY B 205  | 10120   | 7520    | 5500   | 710  | 1250  | 940  | C0 |
| ATOM 6325 C GLY B 205     | -50.449 | -18.909 | 50.958 | 1.00 | 64.59 |      | C0 |
| ANISOU 6325 C GLY B 205   | 10760   | 7920    | 5870   | 880  | 1160  | 1020 | C0 |
| ATOM 6326 O GLY B 205     | -49.763 | -19.344 | 50.009 | 1.00 | 64.05 |      | O0 |
| ANISOU 6326 O GLY B 205   | 10620   | 7810    | 5910   | 890  | 1070  | 1000 | O0 |
| ATOM 6327 H GLY B 205     | -52.472 | -18.208 | 48.822 | 1.00 | 56.25 |      | H0 |
| ANISOU 6327 H GLY B 205   | 9280    | 6880    | 5210   | 460  | 1330  | 870  | H0 |
| ATOM 6328 HA2 GLY B 205   | -51.465 | -17.108 | 51.080 | 1.00 | 60.58 |      | H0 |
| ANISOU 6328 HA2 GLY B 205 | 10050   | 7580    | 5390   | 770  | 1180  | 890  | H0 |
| ATOM 6329 HA3 GLY B 205   | -52.448 | -18.368 | 50.999 | 1.00 | 61.73 |      | H0 |
| ANISOU 6329 HA3 GLY B 205 | 10290   | 7570    | 5580   | 650  | 1420  | 1000 | H0 |
| ATOM 6330 N ARG B 206     | -50.262 | -19.220 | 52.248 | 1.00 | 70.75 |      | N0 |
| ANISOU 6330 N ARG B 206   | 11760   | 8690    | 6430   | 1020 | 1190  | 1110 | N0 |
| ATOM 6331 CA ARG B 206    | -49.205 | -20.121 | 52.791 | 1.00 | 75.03 |      | C0 |
| ANISOU 6331 CA ARG B 206  | 12510   | 9170    | 6830   | 1220 | 1110  | 1220 | C0 |
| ATOM 6332 C ARG B 206     | -47.836 | -19.465 | 52.567 | 1.00 | 74.39 |      | C0 |
| ANISOU 6332 C ARG B 206   | 12290   | 9240    | 6740   | 1350 | 830   | 1130 | C0 |
| ATOM 6333 O ARG B 206     | -47.192 | -19.052 | 53.538 | 1.00 | 74.35 |      | O0 |
| ANISOU 6333 O ARG B 206   | 12370   | 9330    | 6550   | 1500 | 700   | 1140 | O0 |
| ATOM 6334 CB ARG B 206    | -49.341 | -21.527 | 52.185 | 1.00 | 78.33 |      | C0 |
| ANISOU 6334 CB ARG B 206  | 13040   | 9390    | 7340   | 1180 | 1230  | 1310 | C0 |
| ATOM 6335 CG ARG B 206    | -48.034 | -22.278 | 51.956 | 1.00 | 81.52 |      | C0 |
| ANISOU 6335 CG ARG B 206  | 13510   | 9750    | 7710   | 1370 | 1090  | 1350 | C0 |
| ATOM 6336 CD ARG B 206    | -47.711 | -22.431 | 50.481 | 1.00 | 81.90 |      | C0 |
| ANISOU 6336 CD ARG B 206  | 13380   | 9770    | 7970   | 1300 | 1040  | 1270 | C0 |
| ATOM 6337 NE ARG B 206    | -46.331 | -22.840 | 50.233 | 1.00 | 84.47 |      | N0 |
| ANISOU 6337 NE ARG B 206  | 13710   | 10120   | 8260   | 1510 | 880   | 1290 | N0 |
| ATOM 6338 CZ ARG B 206    | -45.338 | -22.032 | 49.850 | 1.00 | 84.70 |      | C0 |
| ANISOU 6338 CZ ARG B 206  | 13520   | 10340   | 8330   | 1590 | 670   | 1200 | C0 |
| ATOM 6339 NH1 ARG B 206   | -45.541 | -20.736 | 49.669 | 1.00 | 83.07 |      | N0 |
| ANISOU 6339 NH1 ARG B 206 | 13090   | 10280   | 8190   | 1470 | 590   | 1090 | N0 |
| ATOM 6340 NH2 ARG B 206   | -44.129 | -22.529 | 49.650 | 1.00 | 85.84 |      | N0 |
| ANISOU 6340 NH2 ARG B 206 | 13660   | 10510   | 8450   | 1800 | 550   | 1240 | N0 |
| ATOM 6341 H ARG B 206     | -50.808 | -18.893 | 52.898 | 1.00 | 70.90 |      | H0 |
| ANISOU 6341 H ARG B 206   | 11840   | 8730    | 6370   | 1010 | 1270  | 1130 | H0 |
| ATOM 6342 HA ARG B 206    | -49.349 | -20.194 | 53.763 | 1.00 | 76.38 |      | H0 |



|             |                |         |         |        |      |       |      |    |
|-------------|----------------|---------|---------|--------|------|-------|------|----|
| ANISOU 6342 | HA ARG B 206   | 12840   | 9340    | 6840   | 1290 | 1160  | 1280 | H0 |
| ATOM 6343   | HB2 ARG B 206  | -49.902 | -22.062 | 52.784 | 1.00 | 79.65 |      | H0 |
| ANISOU 6343 | HB2 ARG B 206  | 13370   | 9470    | 7420   | 1160 | 1380  | 1400 | H0 |
| ATOM 6344   | HB3 ARG B 206  | -49.812 | -21.454 | 51.330 | 1.00 | 77.10 |      | H0 |
| ANISOU 6344 | HB3 ARG B 206  | 12750   | 9210    | 7340   | 1030 | 1280  | 1250 | H0 |
| ATOM 6345   | HG2 ARG B 206  | -47.299 | -21.804 | 52.397 | 1.00 | 81.48 |      | H0 |
| ANISOU 6345 | HG2 ARG B 206  | 13480   | 9870    | 7610   | 1510 | 950   | 1330 | H0 |
| ATOM 6346   | HG3 ARG B 206  | -48.101 | -23.169 | 52.360 | 1.00 | 82.89 |      | H0 |
| ANISOU 6346 | HG3 ARG B 206  | 13890   | 9800    | 7800   | 1430 | 1190  | 1460 | H0 |
| ATOM 6347   | HD2 ARG B 206  | -48.313 | -23.102 | 50.095 | 1.00 | 82.19 |      | H0 |
| ANISOU 6347 | HD2 ARG B 206  | 13490   | 9670    | 8080   | 1200 | 1170  | 1300 | H0 |
| ATOM 6348   | HD3 ARG B 206  | -47.887 | -21.582 | 50.025 | 1.00 | 80.42 |      | H0 |
| ANISOU 6348 | HD3 ARG B 206  | 13000   | 9680    | 7870   | 1200 | 990   | 1170 | H0 |
| ATOM 6349   | HE ARG B 206   | -46.141 | -23.685 | 50.333 | 1.00 | 85.54 |      | H0 |
| ANISOU 6349 | HE ARG B 206   | 14000   | 10150   | 8360   | 1600 | 920   | 1370 | H0 |
| ATOM 6350   | HH11 ARG B 206 | -46.335 | -20.388 | 49.797 | 1.00 | 82.54 |      | H0 |
| ANISOU 6350 | HH11 ARG B 206 | 13020   | 10210   | 8140   | 1350 | 670   | 1060 | H0 |
| ATOM 6351   | HH12 ARG B 206 | -44.874 | -20.221 | 49.420 | 1.00 | 82.42 |      | H0 |
| ANISOU 6351 | HH12 ARG B 206 | 12870   | 10320   | 8130   | 1510 | 450   | 1030 | H0 |
| ATOM 6352   | HH21 ARG B 206 | -43.982 | -23.390 | 49.769 | 1.00 | 86.83 |      | H0 |
| ANISOU 6352 | HH21 ARG B 206 | 13940   | 10530   | 8520   | 1890 | 600   | 1320 | H0 |
| ATOM 6353   | HH22 ARG B 206 | -43.470 | -21.999 | 49.402 | 1.00 | 85.06 |      | H0 |
| ANISOU 6353 | HH22 ARG B 206 | 13400   | 10540   | 8370   | 1840 | 410   | 1190 | H0 |
| TER 6354    | ARG B 206      |         |         |        |      |       |      |    |
| ATOM 6355   | N ALA C 1      | -65.320 | 11.864  | -2.855 | 1.00 | 70.88 |      | N0 |
| ANISOU 6355 | N ALA C 1      | 7630    | 12400   | 6910   | -440 | -1540 | 2220 | N0 |
| ATOM 6356   | CA ALA C 1     | -64.018 | 11.366  | -2.329 | 1.00 | 68.72 |      | C0 |
| ANISOU 6356 | CA ALA C 1     | 7500    | 11950   | 6660   | -510 | -1390 | 2080 | C0 |
| ATOM 6357   | C ALA C 1      | -64.269 | 10.364  | -1.193 | 1.00 | 67.51 |      | C0 |
| ANISOU 6357 | C ALA C 1      | 7270    | 11810   | 6570   | -580 | -1340 | 1930 | C0 |
| ATOM 6358   | O ALA C 1      | -65.452 | 10.076  | -0.915 | 1.00 | 69.94 |      | O0 |
| ANISOU 6358 | O ALA C 1      | 7420    | 12270   | 6890   | -580 | -1410 | 1940 | O0 |
| ATOM 6359   | CB ALA C 1     | -63.174 | 12.535  | -1.876 | 1.00 | 68.18 |      | C0 |
| ANISOU 6359 | CB ALA C 1     | 7510    | 11680   | 6720   | -380 | -1310 | 2130 | C0 |
| ATOM 6360   | H ALA C 1      | -65.370 | 12.769  | -2.764 | 1.00 | 71.31 |      | H0 |
| ANISOU 6360 | H ALA C 1      | 7670    | 12390   | 7030   | -310 | -1550 | 2300 | H0 |
| ATOM 6361   | HA ALA C 1     | -63.546 | 10.898  | -3.057 | 1.00 | 68.79 |      | H0 |
| ANISOU 6361 | HA ALA C 1     | 7600    | 11990   | 6550   | -620 | -1400 | 2060 | H0 |
| ATOM 6362   | HB1 ALA C 1    | -62.324 | 12.211  | -1.534 | 1.00 | 66.88 |      | H0 |
| ANISOU 6362 | HB1 ALA C 1    | 7430    | 11410   | 6570   | -420 | -1210 | 2040 | H0 |
| ATOM 6363   | HB2 ALA C 1    | -63.013 | 13.129  | -2.628 | 1.00 | 69.05 |      | H0 |
| ANISOU 6363 | HB2 ALA C 1    | 7680    | 11780   | 6770   | -360 | -1350 | 2230 | H0 |
| ATOM 6364   | HB3 ALA C 1    | -63.640 | 13.021  | -1.176 | 1.00 | 68.23 |      | H0 |
| ANISOU 6364 | HB3 ALA C 1    | 7430    | 11650   | 6840   | -260 | -1300 | 2150 | H0 |
| ATOM 6365   | N ASP C 2      | -63.196 | 9.837   | -0.590 | 1.00 | 64.62 |      | N0 |
| ANISOU 6365 | N ASP C 2      | 7020    | 11290   | 6240   | -630 | -1220 | 1800 | N0 |
| ATOM 6366   | CA ASP C 2     | -63.222 | 8.911   | 0.578  | 1.00 | 62.31 |      | C0 |
| ANISOU 6366 | CA ASP C 2     | 6700    | 10960   | 6020   | -690 | -1160 | 1660 | C0 |
| ATOM 6367   | C ASP C 2      | -61.928 | 9.100   | 1.388  | 1.00 | 59.16 |      | C0 |
| ANISOU 6367 | C ASP C 2      | 6420    | 10340   | 5720   | -650 | -1020 | 1570 | C0 |
| ATOM 6368   | O ASP C 2      | -61.157 | 10.025  | 1.058  | 1.00 | 58.92 |      | O0 |
| ANISOU 6368 | O ASP C 2      | 6460    | 10210   | 5710   | -570 | -980  | 1630 | O0 |
| ATOM 6369   | CB ASP C 2     | -63.457 | 7.462   | 0.131  | 1.00 | 63.01 |      | C0 |
| ANISOU 6369 | CB ASP C 2     | 6830    | 11150   | 5960   | -890 | -1220 | 1560 | C0 |

|                         |         |        |        |       |       |      |    |
|-------------------------|---------|--------|--------|-------|-------|------|----|
| ATOM 6370 CG ASP C 2    | -62.302 | 6.798  | -0.607 | 1.00  | 62.98 |      | C0 |
| ANISOU 6370 CG ASP C 2  | 7010    | 11080  | 5840   | -980  | -1180 | 1470 | C0 |
| ATOM 6371 OD1 ASP C 2   | -61.282 | 7.471  | -0.860 | 1.00  | 62.14 |      | O0 |
| ANISOU 6371 OD1 ASP C 2 | 6990    | 10870  | 5750   | -910  | -1110 | 1490 | O0 |
| ATOM 6372 OD2 ASP C 2   | -62.437 | 5.601  | -0.930 | 1.00  | 63.94 |      | O0 |
| ANISOU 6372 OD2 ASP C 2 | 7190    | 11260  | 5850   | -1130 | -1230 | 1380 | O0 |
| ATOM 6373 H ASP C 2     | -62.352 | 10.013 | -0.881 | 1.00  | 64.15 |      | H0 |
| ANISOU 6373 H ASP C 2   | 7070    | 11150  | 6160   | -640  | -1170 | 1790 | H0 |
| ATOM 6374 HA ASP C 2    | -63.980 | 9.172  | 1.150  | 1.00  | 62.69 |      | H0 |
| ANISOU 6374 HA ASP C 2  | 6630    | 11060  | 6140   | -630  | -1180 | 1680 | H0 |
| ATOM 6375 HB2 ASP C 2   | -63.662 | 6.920  | 0.920  | 1.00  | 62.45 |      | H0 |
| ANISOU 6375 HB2 ASP C 2 | 6730    | 11070  | 5930   | -930  | -1190 | 1490 | H0 |
| ATOM 6376 HB3 ASP C 2   | -64.238 | 7.443  | -0.458 | 1.00  | 64.26 |      | H0 |
| ANISOU 6376 HB3 ASP C 2 | 6910    | 11450  | 6050   | -920  | -1310 | 1630 | H0 |
| ATOM 6377 N ARG C 3     | -61.699 | 8.272  | 2.412  | 1.00  | 56.63 |      | N0 |
| ANISOU 6377 N ARG C 3   | 6110    | 9960   | 5450   | -700  | -960  | 1440 | N0 |
| ATOM 6378 CA ARG C 3    | -60.558 | 8.426  | 3.356  | 1.00  | 54.35 |      | C0 |
| ANISOU 6378 CA ARG C 3  | 5910    | 9470   | 5270   | -650  | -840  | 1350 | C0 |
| ATOM 6379 C ARG C 3     | -59.237 | 8.155  | 2.630  | 1.00  | 51.74 |      | C0 |
| ANISOU 6379 C ARG C 3   | 5740    | 9070   | 4850   | -700  | -790  | 1290 | C0 |
| ATOM 6380 O ARG C 3     | -58.280 | 8.918  | 2.867  | 1.00  | 50.29 |      | O0 |
| ANISOU 6380 O ARG C 3   | 5610    | 8760   | 4740   | -620  | -710  | 1300 | O0 |
| ATOM 6381 CB ARG C 3    | -60.704 | 7.506  | 4.574  | 1.00  | 54.08 |      | C0 |
| ANISOU 6381 CB ARG C 3  | 5860    | 9400   | 5290   | -710  | -800  | 1230 | C0 |
| ATOM 6382 CG ARG C 3    | -61.760 | 7.976  | 5.560  | 1.00  | 55.36 |      | C0 |
| ANISOU 6382 CG ARG C 3  | 5860    | 9620   | 5550   | -640  | -810  | 1270 | C0 |
| ATOM 6383 CD ARG C 3    | -61.669 | 7.252  | 6.886  | 1.00  | 55.30 |      | C0 |
| ANISOU 6383 CD ARG C 3  | 5860    | 9550   | 5610   | -700  | -750  | 1160 | C0 |
| ATOM 6384 NE ARG C 3    | -62.732 | 7.680  | 7.780  | 1.00  | 56.37 |      | N0 |
| ANISOU 6384 NE ARG C 3  | 5820    | 9770   | 5820   | -640  | -740  | 1190 | N0 |
| ATOM 6385 CZ ARG C 3    | -63.999 | 7.292  | 7.698  | 1.00  | 58.79 |      | C0 |
| ANISOU 6385 CZ ARG C 3  | 5990    | 10270  | 6080   | -710  | -820  | 1230 | C0 |
| ATOM 6386 NH1 ARG C 3   | -64.883 | 7.752  | 8.569  | 1.00  | 60.07 |      | N0 |
| ANISOU 6386 NH1 ARG C 3 | 5980    | 10530  | 6310   | -640  | -800  | 1240 | N0 |
| ATOM 6387 NH2 ARG C 3   | -64.386 | 6.454  | 6.749  | 1.00  | 60.04 |      | N0 |
| ANISOU 6387 NH2 ARG C 3 | 6170    | 10550  | 6100   | -850  | -910  | 1230 | N0 |
| ATOM 6388 H ARG C 3     | -62.236 | 7.561  | 2.598  | 1.00  | 56.97 |      | H0 |
| ANISOU 6388 H ARG C 3   | 6120    | 10070  | 5460   | -780  | -1000 | 1400 | H0 |
| ATOM 6389 HA ARG C 3    | -60.550 | 9.360  | 3.670  | 1.00  | 54.18 |      | H0 |
| ANISOU 6389 HA ARG C 3  | 5850    | 9400   | 5330   | -540  | -810  | 1410 | H0 |
| ATOM 6390 HB2 ARG C 3   | -60.936 | 6.606  | 4.264  | 1.00  | 54.43 |      | H0 |
| ANISOU 6390 HB2 ARG C 3 | 5930    | 9510   | 5240   | -820  | -850  | 1190 | H0 |
| ATOM 6391 HB3 ARG C 3   | -59.841 | 7.455  | 5.035  | 1.00  | 53.11 |      | H0 |
| ANISOU 6391 HB3 ARG C 3 | 5820    | 9160   | 5210   | -690  | -730  | 1170 | H0 |
| ATOM 6392 HG2 ARG C 3   | -61.653 | 8.939  | 5.716  | 1.00  | 55.38 |      | H0 |
| ANISOU 6392 HG2 ARG C 3 | 5830    | 9570   | 5640   | -520  | -770  | 1330 | H0 |
| ATOM 6393 HG3 ARG C 3   | -62.650 | 7.830  | 5.175  | 1.00  | 56.43 |      | H0 |
| ANISOU 6393 HG3 ARG C 3 | 5910    | 9890   | 5640   | -680  | -880  | 1320 | H0 |
| ATOM 6394 HD2 ARG C 3   | -61.733 | 6.284  | 6.738  | 1.00  | 55.22 |      | H0 |
| ANISOU 6394 HD2 ARG C 3 | 5900    | 9570   | 5520   | -820  | -780  | 1110 | H0 |
| ATOM 6395 HD3 ARG C 3   | -60.800 | 7.439  | 7.300  | 1.00  | 54.19 |      | H0 |
| ANISOU 6395 HD3 ARG C 3 | 5800    | 9270   | 5520   | -650  | -680  | 1120 | H0 |
| ATOM 6396 HE ARG C 3    | -62.522 | 8.235  | 8.420  | 1.00  | 56.13 |      | H0 |
| ANISOU 6396 HE ARG C 3  | 5780    | 9670   | 5880   | -550  | -690  | 1190 | H0 |

|        |      |      |     |   |   |         |        |        |       |       |      |    |
|--------|------|------|-----|---|---|---------|--------|--------|-------|-------|------|----|
| ATOM   | 6397 | HH11 | ARG | C | 3 | -64.628 | 8.310  | 9.199  | 1.00  | 59.28 | H0   |    |
| ANISOU | 6397 | HH11 | ARG | C | 3 | 5870    | 10350  | 6300   | -550  | -740  | 1230 | H0 |
| ATOM   | 6398 | HH12 | ARG | C | 3 | -65.723 | 7.498  | 8.518  | 1.00  | 60.70 | H0   |    |
| ANISOU | 6398 | HH12 | ARG | C | 3 | 5950    | 10750  | 6360   | -700  | -850  | 1260 | H0 |
| ATOM   | 6399 | HH21 | ARG | C | 3 | -63.807 | 6.142  | 6.166  | 1.00  | 59.56 | H0   |    |
| ANISOU | 6399 | HH21 | ARG | C | 3 | 6220    | 10430  | 5980   | -900  | -930  | 1220 | H0 |
| ATOM   | 6400 | HH22 | ARG | C | 3 | -65.230 | 6.204  | 6.705  | 1.00  | 60.77 | H0   |    |
| ANISOU | 6400 | HH22 | ARG | C | 3 | 6160    | 10780  | 6150   | -910  | -970  | 1260 | H0 |
| ATOM   | 6401 | N    | ALA | C | 4 | -59.186 | 7.098  | 1.812  | 1.00  | 50.61 | N0   |    |
| ANISOU | 6401 | N    | ALA | C | 4 | 5660    | 9000   | 4560   | -820  | -840  | 1230 | N0 |
| ATOM   | 6402 | CA   | ALA | C | 4 | -58.020 | 6.727  | 0.972  | 1.00  | 49.79 | C0   |    |
| ANISOU | 6402 | CA   | ALA | C | 4 | 5700    | 8870   | 4350   | -870  | -810  | 1160 | C0 |
| ATOM   | 6403 | C    | ALA | C | 4 | -57.549 | 7.951  | 0.174  | 1.00  | 49.44 | C0   |    |
| ANISOU | 6403 | C    | ALA | C | 4 | 5670    | 8830   | 4280   | -810  | -790  | 1280 | C0 |
| ATOM   | 6404 | O    | ALA | C | 4 | -56.335 | 8.227  | 0.181  | 1.00  | 48.86 | O0   |    |
| ANISOU | 6404 | O    | ALA | C | 4 | 5670    | 8670   | 4220   | -790  | -690  | 1230 | O0 |
| ATOM   | 6405 | CB   | ALA | C | 4 | -58.374 | 5.577  | 0.058  | 1.00  | 50.53 | C0   |    |
| ANISOU | 6405 | CB   | ALA | C | 4 | 5840    | 9080   | 4280   | -1010 | -900  | 1100 | C0 |
| ATOM   | 6406 | H    | ALA | C | 4 | -59.878 | 6.513  | 1.717  | 1.00  | 51.31 | H0   |    |
| ANISOU | 6406 | H    | ALA | C | 4 | 5720    | 9170   | 4600   | -890  | -910  | 1220 | H0 |
| ATOM   | 6407 | HA   | ALA | C | 4 | -57.287 | 6.443  | 1.567  | 1.00  | 48.73 | H0   |    |
| ANISOU | 6407 | HA   | ALA | C | 4 | 5620    | 8640   | 4260   | -860  | -740  | 1070 | H0 |
| ATOM   | 6408 | HB1  | ALA | C | 4 | -57.605 | 5.349  | -0.491 | 1.00  | 50.61 | H0   |    |
| ANISOU | 6408 | HB1  | ALA | C | 4 | 5940    | 9080   | 4210   | -1030 | -870  | 1040 | H0 |
| ATOM   | 6409 | HB2  | ALA | C | 4 | -58.630 | 4.805  | 0.591  | 1.00  | 50.27 | H0   |    |
| ANISOU | 6409 | HB2  | ALA | C | 4 | 5820    | 9030   | 4260   | -1060 | -910  | 1030 | H0 |
| ATOM   | 6410 | HB3  | ALA | C | 4 | -59.115 | 5.833  | -0.516 | 1.00  | 51.59 | H0   |    |
| ANISOU | 6410 | HB3  | ALA | C | 4 | 5920    | 9320   | 4360   | -1020 | -970  | 1190 | H0 |
| ATOM   | 6411 | N    | ASP | C | 5 | -58.480 | 8.672  | -0.458 | 1.00  | 50.15 | N0   |    |
| ANISOU | 6411 | N    | ASP | C | 5 | 5680    | 9030   | 4350   | -780  | -870  | 1430 | N0 |
| ATOM   | 6412 | CA   | ASP | C | 5 | -58.192 | 9.851  | -1.323 | 1.00  | 51.14 | C0   |    |
| ANISOU | 6412 | CA   | ASP | C | 5 | 5840    | 9160   | 4430   | -730  | -880  | 1570 | C0 |
| ATOM   | 6413 | C    | ASP | C | 5 | -57.590 | 10.984 | -0.482 | 1.00  | 49.93 | C0   |    |
| ANISOU | 6413 | C    | ASP | C | 5 | 5700    | 8840   | 4440   | -620  | -790  | 1610 | C0 |
| ATOM   | 6414 | O    | ASP | C | 5 | -56.608 | 11.596 | -0.934 | 1.00  | 49.23 | O0   |    |
| ANISOU | 6414 | O    | ASP | C | 5 | 5700    | 8700   | 4310   | -630  | -730  | 1650 | O0 |
| ATOM   | 6415 | CB   | ASP | C | 5 | -59.446 | 10.321 | -2.068 | 1.00  | 52.84 | C0   |    |
| ANISOU | 6415 | CB   | ASP | C | 5 | 5970    | 9510   | 4590   | -710  | -1010 | 1730 | C0 |
| ATOM   | 6416 | CG   | ASP | C | 5 | -59.927 | 9.355  | -3.139 | 1.00  | 54.15 | C0   |    |
| ANISOU | 6416 | CG   | ASP | C | 5 | 6150    | 9860   | 4580   | -850  | -1100 | 1710 | C0 |
| ATOM   | 6417 | OD1  | ASP | C | 5 | -59.078 | 8.660  | -3.725 | 1.00  | 53.61 | O0   |    |
| ANISOU | 6417 | OD1  | ASP | C | 5 | 6180    | 9800   | 4390   | -950  | -1060 | 1610 | O0 |
| ATOM   | 6418 | OD2  | ASP | C | 5 | -61.154 | 9.300  | -3.374 | 1.00  | 55.92 | O0   |    |
| ANISOU | 6418 | OD2  | ASP | C | 5 | 6260    | 10210  | 4770   | -850  | -1210 | 1790 | O0 |
| ATOM   | 6419 | H    | ASP | C | 5 | -59.367 | 8.475  | -0.398 | 1.00  | 50.81 | H0   |    |
| ANISOU | 6419 | H    | ASP | C | 5 | 5690    | 9180   | 4430   | -790  | -930  | 1460 | H0 |
| ATOM   | 6420 | HA   | ASP | C | 5 | -57.523 | 9.579  | -1.993 | 1.00  | 51.23 | H0   |    |
| ANISOU | 6420 | HA   | ASP | C | 5 | 5930    | 9200   | 4340   | -800  | -850  | 1540 | H0 |
| ATOM   | 6421 | HB2  | ASP | C | 5 | -60.170 | 10.452 | -1.422 | 1.00  | 52.90 | H0   |    |
| ANISOU | 6421 | HB2  | ASP | C | 5 | 5880    | 9520   | 4690   | -660  | -1030 | 1750 | H0 |
| ATOM   | 6422 | HB3  | ASP | C | 5 | -59.259 | 11.183 | -2.494 | 1.00  | 53.54 | H0   |    |
| ANISOU | 6422 | HB3  | ASP | C | 5 | 6090    | 9580   | 4680   | -670  | -1010 | 1830 | H0 |
| ATOM   | 6423 | N    | ILE | C | 6 | -58.159 | 11.256 | 0.694  | 1.00  | 49.74 | N0   |    |
| ANISOU | 6423 | N    | ILE | C | 6 | 5580    | 8750   | 4570   | -520  | -770  | 1610 | N0 |

|                          |         |        |       |      |       |      |    |
|--------------------------|---------|--------|-------|------|-------|------|----|
| ATOM 6424 CA ILE C 6     | -57.675 | 12.331 | 1.611 | 1.00 | 49.41 | C0   |    |
| ANISOU 6424 CA ILE C 6   | 5550    | 8540   | 4680  | -410 | -690  | 1640 | C0 |
| ATOM 6425 C ILE C 6      | -56.236 | 12.002 | 2.034 | 1.00 | 48.06 | C0   |    |
| ANISOU 6425 C ILE C 6    | 5480    | 8260   | 4520  | -460 | -570  | 1510 | C0 |
| ATOM 6426 O ILE C 6      | -55.394 | 12.911 | 1.958 | 1.00 | 47.40 | O0   |    |
| ANISOU 6426 O ILE C 6    | 5460    | 8080   | 4470  | -430 | -510  | 1550 | O0 |
| ATOM 6427 CB ILE C 6     | -58.637 | 12.521 | 2.801 | 1.00 | 49.42 | C0   |    |
| ANISOU 6427 CB ILE C 6   | 5430    | 8520   | 4830  | -310 | -700  | 1630 | C0 |
| ATOM 6428 CG1 ILE C 6    | -59.978 | 13.095 | 2.336 | 1.00 | 51.45 | C0   |    |
| ANISOU 6428 CG1 ILE C 6  | 5580    | 8890   | 5080  | -230 | -820  | 1770 | C0 |
| ATOM 6429 CG2 ILE C 6    | -58.006 | 13.380 | 3.889 | 1.00 | 48.51 | C0   |    |
| ANISOU 6429 CG2 ILE C 6  | 5340    | 8220   | 4870  | -210 | -610  | 1610 | C0 |
| ATOM 6430 CD1 ILE C 6    | -61.105 | 12.901 | 3.322 | 1.00 | 52.03 | C0   |    |
| ANISOU 6430 CD1 ILE C 6  | 5490    | 9030   | 5250  | -160 | -840  | 1740 | C0 |
| ATOM 6431 H ILE C 6      | -58.882 | 10.801 | 1.010 | 1.00 | 49.76 | H0   |    |
| ANISOU 6431 H ILE C 6    | 5520    | 8810   | 4580  | -530 | -810  | 1590 | H0 |
| ATOM 6432 HA ILE C 6     | -57.656 | 13.165 | 1.108 | 1.00 | 50.25 | H0   |    |
| ANISOU 6432 HA ILE C 6   | 5690    | 8630   | 4780  | -370 | -720  | 1740 | H0 |
| ATOM 6433 HB ILE C 6     | -58.813 | 11.628 | 3.188 | 1.00 | 48.84 | H0   |    |
| ANISOU 6433 HB ILE C 6   | 5330    | 8480   | 4740  | -360 | -700  | 1540 | H0 |
| ATOM 6434 HG12 ILE C 6   | -59.867 | 14.056 | 2.170 | 1.00 | 52.08 | H0   |    |
| ANISOU 6434 HG12 ILE C 6 | 5690    | 8900   | 5200  | -150 | -830  | 1860 | H0 |
| ATOM 6435 HG13 ILE C 6   | -60.227 | 12.671 | 1.488 | 1.00 | 52.17 | H0   |    |
| ANISOU 6435 HG13 ILE C 6 | 5670    | 9090   | 5060  | -300 | -880  | 1790 | H0 |
| ATOM 6436 HG21 ILE C 6   | -57.344 | 12.858 | 4.375 | 1.00 | 47.42 | H0   |    |
| ANISOU 6436 HG21 ILE C 6 | 5240    | 8030   | 4740  | -250 | -540  | 1510 | H0 |
| ATOM 6437 HG22 ILE C 6   | -58.693 | 13.682 | 4.508 | 1.00 | 48.71 | H0   |    |
| ANISOU 6437 HG22 ILE C 6 | 5290    | 8240   | 4980  | -130 | -620  | 1620 | H0 |
| ATOM 6438 HG23 ILE C 6   | -57.574 | 14.153 | 3.486 | 1.00 | 48.97 | H0   |    |
| ANISOU 6438 HG23 ILE C 6 | 5460    | 8220   | 4920  | -180 | -600  | 1680 | H0 |
| ATOM 6439 HD11 ILE C 6   | -61.206 | 11.953 | 3.518 | 1.00 | 51.34 | H0   |    |
| ANISOU 6439 HD11 ILE C 6 | 5390    | 9000   | 5120  | -260 | -840  | 1650 | H0 |
| ATOM 6440 HD12 ILE C 6   | -61.932 | 13.242 | 2.942 | 1.00 | 53.11 | H0   |    |
| ANISOU 6440 HD12 ILE C 6 | 5550    | 9260   | 5370  | -110 | -920  | 1820 | H0 |
| ATOM 6441 HD13 ILE C 6   | -60.906 | 13.381 | 4.145 | 1.00 | 51.34 | H0   |    |
| ANISOU 6441 HD13 ILE C 6 | 5400    | 8840   | 5270  | -80  | -780  | 1710 | H0 |
| ATOM 6442 N LEU C 7      | -55.964 | 10.747 | 2.418 | 1.00 | 47.77 | N0   |    |
| ANISOU 6442 N LEU C 7    | 5450    | 8240   | 4460  | -530 | -550  | 1360 | N0 |
| ATOM 6443 CA LEU C 7     | -54.612 | 10.255 | 2.820 | 1.00 | 47.24 | C0   |    |
| ANISOU 6443 CA LEU C 7   | 5470    | 8090   | 4400  | -560 | -450  | 1210 | C0 |
| ATOM 6444 C LEU C 7      | -53.651 | 10.353 | 1.625 | 1.00 | 47.43 | C0   |    |
| ANISOU 6444 C LEU C 7    | 5570    | 8170   | 4280  | -630 | -420  | 1220 | C0 |
| ATOM 6445 O LEU C 7      | -52.513 | 10.825 | 1.814 | 1.00 | 46.05 | O0   |    |
| ANISOU 6445 O LEU C 7    | 5440    | 7920   | 4130  | -620 | -330  | 1190 | O0 |
| ATOM 6446 CB LEU C 7     | -54.733 | 8.814  | 3.336 | 1.00 | 47.62 | C0   |    |
| ANISOU 6446 CB LEU C 7   | 5520    | 8150   | 4420  | -620 | -460  | 1070 | C0 |
| ATOM 6447 CG LEU C 7     | -53.529 | 8.229  | 4.088 | 1.00 | 47.79 | C0   |    |
| ANISOU 6447 CG LEU C 7   | 5610    | 8070   | 4490  | -620 | -380  | 910  | C0 |
| ATOM 6448 CD1 LEU C 7    | -52.620 | 7.436  | 3.157 | 1.00 | 48.90 | C0   |    |
| ANISOU 6448 CD1 LEU C 7  | 5830    | 8260   | 4480  | -680 | -370  | 810  | C0 |
| ATOM 6449 CD2 LEU C 7    | -52.728 | 9.294  | 4.824 | 1.00 | 47.31 | C0   |    |
| ANISOU 6449 CD2 LEU C 7  | 5550    | 7890   | 4540  | -540 | -280  | 930  | C0 |
| ATOM 6450 H LEU C 7      | -56.609 | 10.104 | 2.456 | 1.00 | 47.89 | H0   |    |
| ANISOU 6450 H LEU C 7    | 5430    | 8320   | 4450  | -560 | -600  | 1330 | H0 |

|        |      |      |     |   |   |         |        |        |       |       |      |    |
|--------|------|------|-----|---|---|---------|--------|--------|-------|-------|------|----|
| ATOM   | 6451 | HA   | LEU | C | 7 | -54.279 | 10.836 | 3.540  | 1.00  | 46.68 | H0   |    |
| ANISOU | 6451 | HA   | LEU | C | 7 | 5390    | 7920   | 4430   | -500  | -390  | 1220 | H0 |
| ATOM   | 6452 | HB2  | LEU | C | 7 | -55.508 | 8.772  | 3.931  | 1.00  | 47.57 | H0   |    |
| ANISOU | 6452 | HB2  | LEU | C | 7 | 5450    | 8140   | 4480   | -600  | -490  | 1080 | H0 |
| ATOM   | 6453 | HB3  | LEU | C | 7 | -54.926 | 8.236  | 2.571  | 1.00  | 48.29 | H0   |    |
| ANISOU | 6453 | HB3  | LEU | C | 7 | 5630    | 8320   | 4400   | -680  | -510  | 1050 | H0 |
| ATOM   | 6454 | HG   | LEU | C | 7 | -53.880 | 7.600  | 4.767  | 1.00  | 47.23 | H0   |    |
| ANISOU | 6454 | HG   | LEU | C | 7 | 5530    | 7970   | 4450   | -620  | -400  | 850  | H0 |
| ATOM   | 6455 | HD11 | LEU | C | 7 | -53.145 | 6.771  | 2.678  | 1.00  | 49.17 | H0   |    |
| ANISOU | 6455 | HD11 | LEU | C | 7 | 5880    | 8370   | 4440   | -730  | -430  | 790  | H0 |
| ATOM   | 6456 | HD12 | LEU | C | 7 | -51.932 | 6.990  | 3.679  | 1.00  | 47.98 | H0   |    |
| ANISOU | 6456 | HD12 | LEU | C | 7 | 5750    | 8080   | 4390   | -670  | -330  | 700  | H0 |
| ATOM   | 6457 | HD13 | LEU | C | 7 | -52.202 | 8.039  | 2.519  | 1.00  | 49.14 | H0   |    |
| ANISOU | 6457 | HD13 | LEU | C | 7 | 5880    | 8330   | 4470   | -680  | -340  | 860  | H0 |
| ATOM   | 6458 | HD21 | LEU | C | 7 | -52.236 | 9.835  | 4.183  | 1.00  | 47.70 | H0   |    |
| ANISOU | 6458 | HD21 | LEU | C | 7 | 5620    | 7950   | 4550   | -550  | -260  | 970  | H0 |
| ATOM   | 6459 | HD22 | LEU | C | 7 | -52.101 | 8.865  | 5.432  | 1.00  | 46.46 | H0   |    |
| ANISOU | 6459 | HD22 | LEU | C | 7 | 5460    | 7720   | 4470   | -530  | -240  | 830  | H0 |
| ATOM   | 6460 | HD23 | LEU | C | 7 | -53.331 | 9.862  | 5.334  | 1.00  | 47.21 | H0   |    |
| ANISOU | 6460 | HD23 | LEU | C | 7 | 5480    | 7840   | 4620   | -490  | -290  | 1000 | H0 |
| ATOM   | 6461 | N    | TYR | C | 8 | -54.091 | 9.949  | 0.429  | 1.00  | 48.53 | N0   |    |
| ANISOU | 6461 | N    | TYR | C | 8 | 5730    | 8450   | 4270   | -700  | -500  | 1260 | N0 |
| ATOM   | 6462 | CA   | TYR | C | 8 | -53.272 | 10.009 | -0.813 | 1.00  | 49.68 | C0   |    |
| ANISOU | 6462 | CA   | TYR | C | 8 | 5940    | 8680   | 4250   | -770  | -480  | 1260 | C0 |
| ATOM   | 6463 | C    | TYR | C | 8 | -52.870 | 11.468 | -1.077 | 1.00  | 50.61 | C0   |    |
| ANISOU | 6463 | C    | TYR | C | 8 | 6090    | 8750   | 4400   | -750  | -440  | 1410 | C0 |
| ATOM   | 6464 | O    | TYR | C | 8 | -51.678 | 11.735 | -1.313 | 1.00  | 49.93 | O0   |    |
| ANISOU | 6464 | O    | TYR | C | 8 | 6050    | 8650   | 4260   | -790  | -350  | 1370 | O0 |
| ATOM   | 6465 | CB   | TYR | C | 8 | -54.023 | 9.390  | -1.993 | 1.00  | 51.10 | C0   |    |
| ANISOU | 6465 | CB   | TYR | C | 8 | 6130    | 9020   | 4270   | -850  | -580  | 1290 | C0 |
| ATOM   | 6466 | CG   | TYR | C | 8 | -53.299 | 9.465  | -3.315 | 1.00  | 52.37 | C0   |    |
| ANISOU | 6466 | CG   | TYR | C | 8 | 6360    | 9290   | 4240   | -940  | -560  | 1300 | C0 |
| ATOM   | 6467 | CD1  | TYR | C | 8 | -52.298 | 8.560  | -3.643 | 1.00  | 52.26 | C0   |    |
| ANISOU | 6467 | CD1  | TYR | C | 8 | 6400    | 9330   | 4130   | -990  | -500  | 1130 | C0 |
| ATOM   | 6468 | CD2  | TYR | C | 8 | -53.612 | 10.446 | -4.242 | 1.00  | 53.67 | C0   |    |
| ANISOU | 6468 | CD2  | TYR | C | 8 | 6540    | 9520   | 4330   | -960  | -610  | 1490 | C0 |
| ATOM   | 6469 | CE1  | TYR | C | 8 | -51.637 | 8.623  | -4.861 | 1.00  | 53.42 | C0   |    |
| ANISOU | 6469 | CE1  | TYR | C | 8 | 6600    | 9600   | 4090   | -1070 | -470  | 1130 | C0 |
| ATOM   | 6470 | CE2  | TYR | C | 8 | -52.959 | 10.524 | -5.463 | 1.00  | 54.93 | C0   |    |
| ANISOU | 6470 | CE2  | TYR | C | 8 | 6760    | 9810   | 4300   | -1050 | -590  | 1500 | C0 |
| ATOM   | 6471 | CZ   | TYR | C | 8 | -51.966 | 9.612  | -5.772 | 1.00  | 54.64 | C0   |    |
| ANISOU | 6471 | CZ   | TYR | C | 8 | 6770    | 9830   | 4160   | -1110 | -510  | 1320 | C0 |
| ATOM   | 6472 | OH   | TYR | C | 8 | -51.318 | 9.693  | -6.969 | 1.00  | 56.38 | O0   |    |
| ANISOU | 6472 | OH   | TYR | C | 8 | 7040    | 10200  | 4180   | -1210 | -490  | 1330 | O0 |
| ATOM   | 6473 | H    | TYR | C | 8 | -54.921 | 9.602  | 0.288  | 1.00  | 48.99 | H0   |    |
| ANISOU | 6473 | H    | TYR | C | 8 | 5750    | 8560   | 4300   | -710  | -570  | 1280 | H0 |
| ATOM   | 6474 | HA   | TYR | C | 8 | -52.444 | 9.486  | -0.663 | 1.00  | 49.15 | H0   |    |
| ANISOU | 6474 | HA   | TYR | C | 8 | 5910    | 8600   | 4170   | -790  | -420  | 1140 | H0 |
| ATOM   | 6475 | HB2  | TYR | C | 8 | -54.202 | 8.449  | -1.785 | 1.00  | 50.73 | H0   |    |
| ANISOU | 6475 | HB2  | TYR | C | 8 | 6080    | 8990   | 4200   | -880  | -600  | 1190 | H0 |
| ATOM   | 6476 | HB3  | TYR | C | 8 | -54.887 | 9.844  | -2.081 | 1.00  | 51.66 | H0   |    |
| ANISOU | 6476 | HB3  | TYR | C | 8 | 6150    | 9110   | 4360   | -830  | -650  | 1410 | H0 |
| ATOM   | 6477 | HD1  | TYR | C | 8 | -52.069 | 7.882  | -3.028 | 1.00  | 51.38 | H0   |    |
| ANISOU | 6477 | HD1  | TYR | C | 8 | 6300    | 9160   | 4060   | -970  | -470  | 1010 | H0 |

|        |      |            |    |         |        |        |       |       |      |    |
|--------|------|------------|----|---------|--------|--------|-------|-------|------|----|
| ATOM   | 6478 | HD2 TYR C  | 8  | -54.289 | 11.072 | -4.042 | 1.00  | 53.97 | H0   |    |
| ANISOU | 6478 | HD2 TYR C  | 8  | 6540    | 9530   | 4440   | -910  | -660  | 1600 | H0 |
| ATOM   | 6479 | HE1 TYR C  | 8  | -50.959 | 8.000  | -5.064 | 1.00  | 53.38 | H0   |    |
| ANISOU | 6479 | HE1 TYR C  | 8  | 6630    | 9640   | 4010   | -1090 | -430  | 1000 | H0 |
| ATOM   | 6480 | HE2 TYR C  | 8  | -53.187 | 11.200 | -6.079 | 1.00  | 55.95 | H0   |    |
| ANISOU | 6480 | HE2 TYR C  | 8  | 6910    | 9970   | 4370   | -1070 | -630  | 1640 | H0 |
| ATOM   | 6481 | N ASN C    | 9  | -53.834 | 12.391 | -1.007 | 1.00  | 52.35 | N0   |    |
| ANISOU | 6481 | N ASN C    | 9  | 6270    | 8940   | 4690   | -680  | -510  | 1570 | N0 |
| ATOM   | 6482 | CA ASN C   | 9  | -53.610 | 13.840 | -1.261 | 1.00  | 54.26 | C0   |    |
| ANISOU | 6482 | CA ASN C   | 9  | 6560    | 9100   | 4960   | -650  | -510  | 1730 | C0 |
| ATOM   | 6483 | C ASN C    | 9  | -52.586 | 14.373 | -0.252 | 1.00  | 53.29 | C0   |    |
| ANISOU | 6483 | C ASN C    | 9  | 6460    | 8820   | 4960   | -620  | -390  | 1670 | C0 |
| ATOM   | 6484 | O ASN C    | 9  | -51.629 | 15.029 | -0.690 | 1.00  | 53.84 | O0   |    |
| ANISOU | 6484 | O ASN C    | 9  | 6610    | 8870   | 4980   | -680  | -330  | 1720 | O0 |
| ATOM   | 6485 | CB ASN C   | 9  | -54.914 | 14.642 | -1.227 | 1.00  | 55.94 | C0   |    |
| ANISOU | 6485 | CB ASN C   | 9  | 6720    | 9290   | 5240   | -540  | -620  | 1890 | C0 |
| ATOM   | 6486 | CG ASN C   | 9  | -54.743 | 16.063 | -1.722 | 1.00  | 58.02 | C0   |    |
| ANISOU | 6486 | CG ASN C   | 9  | 7060    | 9480   | 5500   | -520  | -640  | 2070 | C0 |
| ATOM   | 6487 | OD1 ASN C  | 9  | -54.922 | 17.014 | -0.963 | 1.00  | 59.35 | O0   |    |
| ANISOU | 6487 | OD1 ASN C  | 9  | 7240    | 9490   | 5820   | -410  | -640  | 2140 | O0 |
| ATOM   | 6488 | ND2 ASN C  | 9  | -54.386 | 16.222 | -2.986 | 1.00  | 59.25 | N0   |    |
| ANISOU | 6488 | ND2 ASN C  | 9  | 7300    | 9730   | 5490   | -620  | -670  | 2160 | N0 |
| ATOM   | 6489 | H ASN C    | 9  | -54.697 | 12.183 | -0.802 | 1.00  | 52.40 | H0   |    |
| ANISOU | 6489 | H ASN C    | 9  | 6220    | 8970   | 4730   | -650  | -570  | 1590 | H0 |
| ATOM   | 6490 | HA ASN C   | 9  | -53.230 | 13.933 | -2.166 | 1.00  | 55.06 | H0   |    |
| ANISOU | 6490 | HA ASN C   | 9  | 6710    | 9280   | 4930   | -720  | -510  | 1770 | H0 |
| ATOM   | 6491 | HB2 ASN C  | 9  | -55.580 | 14.188 | -1.783 | 1.00  | 56.57 | H0   |    |
| ANISOU | 6491 | HB2 ASN C  | 9  | 6760    | 9490   | 5240   | -570  | -690  | 1920 | H0 |
| ATOM   | 6492 | HB3 ASN C  | 9  | -55.249 | 14.662 | -0.308 | 1.00  | 55.26 | H0   |    |
| ANISOU | 6492 | HB3 ASN C  | 9  | 6580    | 9140   | 5280   | -470  | -600  | 1860 | H0 |
| ATOM   | 6493 | HD21 ASN C | 9  | -54.113 | 17.012 | -3.273 | 1.00  | 60.06 | H0   |    |
| ANISOU | 6493 | HD21 ASN C | 9  | 7470    | 9780   | 5580   | -630  | -670  | 2260 | H0 |
| ATOM   | 6494 | HD22 ASN C | 9  | -54.420 | 15.538 | -3.545 | 1.00  | 59.41 | H0   |    |
| ANISOU | 6494 | HD22 ASN C | 9  | 7310    | 9870   | 5400   | -690  | -680  | 2120 | H0 |
| ATOM   | 6495 | N ILE C    | 10 | -52.763 | 14.086 | 1.043  | 1.00  | 52.54 | N0   |    |
| ANISOU | 6495 | N ILE C    | 10 | 6310    | 8630   | 5020   | -540  | -360  | 1580 | N0 |
| ATOM   | 6496 | CA ILE C   | 10 | -51.821 | 14.534 | 2.113  | 1.00  | 52.14 | C0   |    |
| ANISOU | 6496 | CA ILE C   | 10 | 6280    | 8440   | 5090   | -510  | -250  | 1510 | C0 |
| ATOM   | 6497 | C ILE C    | 10 | -50.407 | 14.061 | 1.745  | 1.00  | 52.22 | C0   |    |
| ANISOU | 6497 | C ILE C    | 10 | 6340    | 8500   | 5000   | -610  | -160  | 1400 | C0 |
| ATOM   | 6498 | O ILE C    | 10 | -49.482 | 14.879 | 1.838  | 1.00  | 52.06 | O0   |    |
| ANISOU | 6498 | O ILE C    | 10 | 6370    | 8410   | 5000   | -640  | -90   | 1420 | O0 |
| ATOM   | 6499 | CB ILE C   | 10 | -52.269 | 14.062 | 3.511  | 1.00  | 50.76 | C0   |    |
| ANISOU | 6499 | CB ILE C   | 10 | 6040    | 8190   | 5060   | -430  | -240  | 1410 | C0 |
| ATOM   | 6500 | CG1 ILE C  | 10 | -53.516 | 14.821 | 3.972  | 1.00  | 51.61 | C0   |    |
| ANISOU | 6500 | CG1 ILE C  | 10 | 6090    | 8240   | 5280   | -310  | -300  | 1520 | C0 |
| ATOM   | 6501 | CG2 ILE C  | 10 | -51.135 | 14.192 | 4.521  | 1.00  | 49.56 | C0   |    |
| ANISOU | 6501 | CG2 ILE C  | 10 | 5910    | 7920   | 5000   | -420  | -130  | 1300 | C0 |
| ATOM   | 6502 | CD1 ILE C  | 10 | -54.205 | 14.212 | 5.164  | 1.00  | 50.69 | C0   |    |
| ANISOU | 6502 | CD1 ILE C  | 10 | 5880    | 8110   | 5270   | -250  | -300  | 1420 | C0 |
| ATOM   | 6503 | H ILE C    | 10 | -53.469 | 13.600 | 1.351  | 1.00  | 52.28 | H0   |    |
| ANISOU | 6503 | H ILE C    | 10 | 6220    | 8630   | 5010   | -510  | -400  | 1550 | H0 |
| ATOM   | 6504 | HA ILE C   | 10 | -51.820 | 15.506 | 2.118  | 1.00  | 52.67 | H0   |    |
| ANISOU | 6504 | HA ILE C   | 10 | 6380    | 8430   | 5200   | -480  | -250  | 1610 | H0 |

|                           |         |        |        |      |       |      |    |
|---------------------------|---------|--------|--------|------|-------|------|----|
| ATOM 6505 HB ILE C 10     | -52.508 | 13.105 | 3.444  | 1.00 | 50.48 | H0   |    |
| ANISOU 6505 HB ILE C 10   | 5980    | 8220   | 4980   | -450 | -260  | 1330 | H0 |
| ATOM 6506 HG12 ILE C 10   | -53.258 | 15.741 | 4.195  | 1.00 | 51.84 | H0   |    |
| ANISOU 6506 HG12 ILE C 10 | 6150    | 8170   | 5370   | -270 | -280  | 1570 | H0 |
| ATOM 6507 HG13 ILE C 10   | -54.153 | 14.861 | 3.228  | 1.00 | 52.49 | H0   |    |
| ANISOU 6507 HG13 ILE C 10 | 6180    | 8430   | 5330   | -310 | -380  | 1600 | H0 |
| ATOM 6508 HG21 ILE C 10   | -50.473 | 13.496 | 4.362  | 1.00 | 49.17 | H0   |    |
| ANISOU 6508 HG21 ILE C 10 | 5880    | 7920   | 4890   | -470 | -90   | 1210 | H0 |
| ATOM 6509 HG22 ILE C 10   | -51.486 | 14.098 | 5.423  | 1.00 | 48.90 | H0   |    |
| ANISOU 6509 HG22 ILE C 10 | 5790    | 7780   | 5010   | -360 | -120  | 1260 | H0 |
| ATOM 6510 HG23 ILE C 10   | -50.715 | 15.064 | 4.429  | 1.00 | 50.03 | H0   |    |
| ANISOU 6510 HG23 ILE C 10 | 6010    | 7920   | 5080   | -420 | -100  | 1370 | H0 |
| ATOM 6511 HD11 ILE C 10   | -54.281 | 13.250 | 5.040  | 1.00 | 50.30 | H0   |    |
| ANISOU 6511 HD11 ILE C 10 | 5820    | 8140   | 5160   | -310 | -320  | 1350 | H0 |
| ATOM 6512 HD12 ILE C 10   | -55.093 | 14.597 | 5.259  | 1.00 | 51.28 | H0   |    |
| ANISOU 6512 HD12 ILE C 10 | 5900    | 8200   | 5380   | -180 | -350  | 1490 | H0 |
| ATOM 6513 HD13 ILE C 10   | -53.688 | 14.394 | 5.968  | 1.00 | 49.90 | H0   |    |
| ANISOU 6513 HD13 ILE C 10 | 5790    | 7920   | 5250   | -230 | -240  | 1370 | H0 |
| ATOM 6514 N ARG C 11      | -50.257 | 12.807 | 1.308  | 1.00 | 53.10 | N0   |    |
| ANISOU 6514 N ARG C 11    | 6440    | 8730   | 5000   | -660 | -170  | 1280 | N0 |
| ATOM 6515 CA ARG C 11     | -48.966 | 12.223 | 0.846  | 1.00 | 54.41 | C0   |    |
| ANISOU 6515 CA ARG C 11   | 6640    | 8980   | 5060   | -740 | -90   | 1150 | C0 |
| ATOM 6516 C ARG C 11      | -48.389 | 13.044 | -0.319 | 1.00 | 55.59 | C0   |    |
| ANISOU 6516 C ARG C 11    | 6840    | 9210   | 5070   | -830 | -60   | 1260 | C0 |
| ATOM 6517 O ARG C 11      | -47.151 | 13.156 | -0.396 | 1.00 | 55.44 | O0   |    |
| ANISOU 6517 O ARG C 11    | 6830    | 9230   | 5000   | -890 | 30    | 1190 | O0 |
| ATOM 6518 CB ARG C 11     | -49.164 | 10.758 | 0.449  | 1.00 | 55.92 | C0   |    |
| ANISOU 6518 CB ARG C 11   | 6830    | 9280   | 5150   | -760 | -130  | 1010 | C0 |
| ATOM 6519 CG ARG C 11     | -49.420 | 9.833  | 1.630  | 1.00 | 56.29 | C0   |    |
| ANISOU 6519 CG ARG C 11   | 6850    | 9230   | 5310   | -700 | -140  | 880  | C0 |
| ATOM 6520 CD ARG C 11     | -48.120 | 9.280  | 2.185  | 1.00 | 57.02 | C0   |    |
| ANISOU 6520 CD ARG C 11   | 6950    | 9300   | 5410   | -680 | -50   | 710  | C0 |
| ATOM 6521 NE ARG C 11     | -48.279 | 8.598  | 3.462  | 1.00 | 56.63 | N0   |    |
| ANISOU 6521 NE ARG C 11   | 6890    | 9140   | 5490   | -620 | -60   | 610  | N0 |
| ATOM 6522 CZ ARG C 11     | -48.910 | 7.439  | 3.636  | 1.00 | 57.33 | C0   |    |
| ANISOU 6522 CZ ARG C 11   | 7000    | 9220   | 5560   | -620 | -130  | 530  | C0 |
| ATOM 6523 NH1 ARG C 11    | -49.484 | 6.817  | 2.616  | 1.00 | 58.37 | N0   |    |
| ANISOU 6523 NH1 ARG C 11  | 7160    | 9460   | 5560   | -680 | -200  | 540  | N0 |
| ATOM 6524 NH2 ARG C 11    | -48.980 | 6.912  | 4.846  | 1.00 | 56.84 | N0   |    |
| ANISOU 6524 NH2 ARG C 11  | 6940    | 9050   | 5600   | -580 | -130  | 460  | N0 |
| ATOM 6525 H ARG C 11      | -50.953 | 12.221 | 1.273  | 1.00 | 53.10 | H0   |    |
| ANISOU 6525 H ARG C 11    | 6410    | 8770   | 4990   | -650 | -220  | 1260 | H0 |
| ATOM 6526 HA ARG C 11     | -48.329 | 12.260 | 1.597  | 1.00 | 53.61 | H0   |    |
| ANISOU 6526 HA ARG C 11   | 6530    | 8810   | 5030   | -710 | -20   | 1080 | H0 |
| ATOM 6527 HB2 ARG C 11    | -49.919 | 10.697 | -0.169 | 1.00 | 56.60 | H0   |    |
| ANISOU 6527 HB2 ARG C 11  | 6910    | 9420   | 5170   | -780 | -200  | 1080 | H0 |
| ATOM 6528 HB3 ARG C 11    | -48.362 | 10.451 | -0.025 | 1.00 | 56.22 | H0   |    |
| ANISOU 6528 HB3 ARG C 11  | 6880    | 9390   | 5090   | -800 | -80   | 940  | H0 |
| ATOM 6529 HG2 ARG C 11    | -49.888 | 10.326 | 2.337  | 1.00 | 55.76 | H0   |    |
| ANISOU 6529 HG2 ARG C 11  | 6750    | 9080   | 5350   | -650 | -140  | 940  | H0 |
| ATOM 6530 HG3 ARG C 11    | -49.993 | 9.092  | 1.344  | 1.00 | 56.42 | H0   |    |
| ANISOU 6530 HG3 ARG C 11  | 6870    | 9300   | 5270   | -710 | -200  | 850  | H0 |
| ATOM 6531 HD2 ARG C 11    | -47.736 | 8.654  | 1.535  | 1.00 | 57.34 | H0   |    |
| ANISOU 6531 HD2 ARG C 11  | 7020    | 9420   | 5340   | -710 | -50   | 630  | H0 |

|                           |         |        |        |       |       |      |    |
|---------------------------|---------|--------|--------|-------|-------|------|----|
| ATOM 6532 HD3 ARG C 11    | -47.484 | 10.018 | 2.297  | 1.00  | 56.88 | H0   |    |
| ANISOU 6532 HD3 ARG C 11  | 6930    | 9260   | 5420   | -680  | 10    | 740  | H0 |
| ATOM 6533 HE ARG C 11     | -47.917 | 8.968  | 4.164  | 1.00  | 56.12 | H0   |    |
| ANISOU 6533 HE ARG C 11   | 6820    | 9000   | 5510   | -590  | -20   | 600  | H0 |
| ATOM 6534 HH11 ARG C 11   | -49.439 | 7.150  | 1.808  | 1.00  | 59.01 | H0   |    |
| ANISOU 6534 HH11 ARG C 11 | 7240    | 9620   | 5560   | -710  | -200  | 590  | H0 |
| ATOM 6535 HH12 ARG C 11   | -49.898 | 6.052  | 2.750  | 1.00  | 58.21 | H0   |    |
| ANISOU 6535 HH12 ARG C 11 | 7160    | 9430   | 5530   | -690  | -250  | 490  | H0 |
| ATOM 6536 HH21 ARG C 11   | -48.607 | 7.325  | 5.530  | 1.00  | 56.02 | H0   |    |
| ANISOU 6536 HH21 ARG C 11 | 6820    | 8880   | 5580   | -540  | -90   | 450  | H0 |
| ATOM 6537 HH22 ARG C 11   | -49.403 | 6.151  | 4.968  | 1.00  | 56.52 | H0   |    |
| ANISOU 6537 HH22 ARG C 11 | 6920    | 9010   | 5550   | -590  | -180  | 410  | H0 |
| ATOM 6538 N GLN C 12      | -49.245 | 13.604 | -1.182 | 1.00  | 56.71 | N0   |    |
| ANISOU 6538 N GLN C 12    | 7000    | 9400   | 5140   | -850  | -150  | 1420 | N0 |
| ATOM 6539 CA GLN C 12     | -48.835 | 14.445 | -2.340 | 1.00  | 58.89 | C0   |    |
| ANISOU 6539 CA GLN C 12   | 7350    | 9750   | 5280   | -950  | -140  | 1560 | C0 |
| ATOM 6540 C GLN C 12      | -48.525 | 15.880 | -1.889 | 1.00  | 59.40 | C0   |    |
| ANISOU 6540 C GLN C 12    | 7460    | 9660   | 5450   | -950  | -120  | 1690 | C0 |
| ATOM 6541 O GLN C 12      | -47.628 | 16.492 | -2.493 | 1.00  | 60.87 | O0   |    |
| ANISOU 6541 O GLN C 12    | 7710    | 9890   | 5530   | -1060 | -60   | 1750 | O0 |
| ATOM 6542 CB GLN C 12     | -49.918 | 14.467 | -3.425 | 1.00  | 60.38 | C0   |    |
| ANISOU 6542 CB GLN C 12   | 7550    | 10040  | 5350   | -970  | -270  | 1700 | C0 |
| ATOM 6543 CG GLN C 12     | -50.361 | 13.088 | -3.899 | 1.00  | 60.40 | C0   |    |
| ANISOU 6543 CG GLN C 12   | 7520    | 10180  | 5250   | -990  | -310  | 1580 | C0 |
| ATOM 6544 CD GLN C 12     | -49.211 | 12.170 | -4.232 | 1.00  | 60.59 | C0   |    |
| ANISOU 6544 CD GLN C 12   | 7550    | 10320  | 5160   | -1060 | -220  | 1390 | C0 |
| ATOM 6545 OE1 GLN C 12    | -49.171 | 11.017 | -3.812 | 1.00  | 61.18 | O0   |    |
| ANISOU 6545 OE1 GLN C 12  | 7600    | 10400  | 5250   | -1030 | -210  | 1220 | O0 |
| ATOM 6546 NE2 GLN C 12    | -48.252 | 12.685 | -4.981 | 1.00  | 61.75 | N0   |    |
| ANISOU 6546 NE2 GLN C 12  | 7740    | 10550  | 5180   | -1160 | -150  | 1420 | N0 |
| ATOM 6547 H GLN C 12      | -50.145 | 13.494 | -1.115 | 1.00  | 56.87 | H0   |    |
| ANISOU 6547 H GLN C 12    | 7000    | 9410   | 5200   | -810  | -220  | 1470 | H0 |
| ATOM 6548 HA GLN C 12     | -48.014 | 14.059 | -2.723 | 1.00  | 58.99 | H0   |    |
| ANISOU 6548 HA GLN C 12   | 7370    | 9850   | 5200   | -1020 | -80   | 1470 | H0 |
| ATOM 6549 HB2 GLN C 12    | -50.696 | 14.949 | -3.077 | 1.00  | 60.42 | H0   |    |
| ANISOU 6549 HB2 GLN C 12  | 7550    | 9960   | 5450   | -900  | -330  | 1790 | H0 |
| ATOM 6550 HB3 GLN C 12    | -49.575 | 14.971 | -4.192 | 1.00  | 61.52 | H0   |    |
| ANISOU 6550 HB3 GLN C 12  | 7750    | 10240  | 5390   | -1050 | -260  | 1780 | H0 |
| ATOM 6551 HG2 GLN C 12    | -50.907 | 12.672 | -3.204 | 1.00  | 59.56 | H0   |    |
| ANISOU 6551 HG2 GLN C 12  | 7370    | 10020  | 5240   | -920  | -340  | 1530 | H0 |
| ATOM 6552 HG3 GLN C 12    | -50.924 | 13.192 | -4.695 | 1.00  | 61.53 | H0   |    |
| ANISOU 6552 HG3 GLN C 12  | 7670    | 10400  | 5300   | -1020 | -390  | 1670 | H0 |
| ATOM 6553 HE21 GLN C 12   | -47.432 | 12.754 | -4.662 | 1.00  | 61.36 | H0   |    |
| ANISOU 6553 HE21 GLN C 12 | 7680    | 10490  | 5150   | -1170 | -70   | 1350 | H0 |
| ATOM 6554 HE22 GLN C 12   | -48.436 | 12.974 | -5.796 | 1.00  | 62.85 | H0   |    |
| ANISOU 6554 HE22 GLN C 12 | 7910    | 10770  | 5210   | -1220 | -180  | 1510 | H0 |
| ATOM 6555 N THR C 13      | -49.239 | 16.409 | -0.890 | 1.00  | 58.99 | N0   |    |
| ANISOU 6555 N THR C 13    | 7390    | 9440   | 5580   | -830  | -150  | 1740 | N0 |
| ATOM 6556 CA THR C 13     | -49.169 | 17.840 | -0.475 | 1.00  | 59.91 | C0   |    |
| ANISOU 6556 CA THR C 13   | 7580    | 9390   | 5800   | -800  | -150  | 1880 | C0 |
| ATOM 6557 C THR C 13      | -48.177 | 18.022 | 0.685  | 1.00  | 58.28 | C0   |    |
| ANISOU 6557 C THR C 13    | 7370    | 9060   | 5710   | -800  | -40   | 1770 | C0 |
| ATOM 6558 O THR C 13      | -47.380 | 18.972 | 0.622  | 1.00  | 58.29 | O0   |    |
| ANISOU 6558 O THR C 13    | 7450    | 9000   | 5700   | -870  | 10    | 1830 | O0 |



|                           |         |        |        |       |       |      |    |
|---------------------------|---------|--------|--------|-------|-------|------|----|
| ATOM 6559 CB THR C 13     | -50.564 | 18.391 | -0.144 | 1.00  | 60.54 | C0   |    |
| ANISOU 6559 CB THR C 13   | 7650    | 9360   | 5990   | -650  | -270  | 2000 | C0 |
| ATOM 6560 OG1 THR C 13    | -51.179 | 17.551 | 0.837  | 1.00  | 59.75 | O0   |    |
| ANISOU 6560 OG1 THR C 13  | 7440    | 9250   | 6010   | -550  | -270  | 1870 | O0 |
| ATOM 6561 CG2 THR C 13    | -51.457 | 18.483 | -1.362 | 1.00  | 61.91 | C0   |    |
| ANISOU 6561 CG2 THR C 13  | 7840    | 9640   | 6040   | -670  | -390  | 2150 | C0 |
| ATOM 6562 H THR C 13      | -49.830 | 15.930 | -0.390 | 1.00  | 58.26 | H0   |    |
| ANISOU 6562 H THR C 13    | 7250    | 9330   | 5550   | -750  | -180  | 1690 | H0 |
| ATOM 6563 HA THR C 13     | -48.824 | 18.350 | -1.244 | 1.00  | 60.99 | H0   |    |
| ANISOU 6563 HA THR C 13   | 7780    | 9560   | 5830   | -880  | -150  | 1970 | H0 |
| ATOM 6564 HB THR C 13     | -50.455 | 19.295 | 0.237  | 1.00  | 60.93 | H0   |    |
| ANISOU 6564 HB THR C 13   | 7750    | 9280   | 6120   | -620  | -260  | 2070 | H0 |
| ATOM 6565 HG21 THR C 13   | -51.050 | 19.073 | -2.021 | 1.00  | 63.08 | H0   |    |
| ANISOU 6565 HG21 THR C 13 | 8070    | 9790   | 6110   | -740  | -390  | 2240 | H0 |
| ATOM 6566 HG22 THR C 13   | -52.326 | 18.839 | -1.102 | 1.00  | 62.29 | H0   |    |
| ANISOU 6566 HG22 THR C 13 | 7860    | 9630   | 6170   | -560  | -460  | 2220 | H0 |
| ATOM 6567 HG23 THR C 13   | -51.573 | 17.597 | -1.749 | 1.00  | 61.70 | H0   |    |
| ANISOU 6567 HG23 THR C 13 | 7760    | 9750   | 5930   | -700  | -390  | 2080 | H0 |
| ATOM 6568 N SER C 14      | -48.218 | 17.150 | 1.696  | 1.00  | 57.36 | N0   |    |
| ANISOU 6568 N SER C 14    | 7170    | 8930   | 5690   | -720  | -10   | 1600 | N0 |
| ATOM 6569 CA SER C 14     | -47.449 | 17.275 | 2.965  | 1.00  | 56.75 | C0   |    |
| ANISOU 6569 CA SER C 14   | 7080    | 8740   | 5750   | -690  | 80    | 1490 | C0 |
| ATOM 6570 C SER C 14      | -45.950 | 17.103 | 2.710  | 1.00  | 56.74 | C0   |    |
| ANISOU 6570 C SER C 14    | 7080    | 8820   | 5650   | -810  | 190   | 1400 | C0 |
| ATOM 6571 O SER C 14      | -45.569 | 16.098 | 2.086  | 1.00  | 56.99 | O0   |    |
| ANISOU 6571 O SER C 14    | 7080    | 9020   | 5560   | -860  | 200   | 1300 | O0 |
| ATOM 6572 CB SER C 14     | -47.908 | 16.279 | 3.990  | 1.00  | 55.56 | C0   |    |
| ANISOU 6572 CB SER C 14   | 6840    | 8570   | 5700   | -600  | 80    | 1350 | C0 |
| ATOM 6573 OG SER C 14     | -47.171 | 16.426 | 5.193  | 1.00  | 55.47 | O0   |    |
| ANISOU 6573 OG SER C 14   | 6820    | 8450   | 5800   | -570  | 160   | 1250 | O0 |
| ATOM 6574 H SER C 14      | -48.734 | 16.400 | 1.681  | 1.00  | 56.89 | H0   |    |
| ANISOU 6574 H SER C 14    | 7060    | 8930   | 5620   | -680  | -40   | 1550 | H0 |
| ATOM 6575 HA SER C 14     | -47.601 | 18.190 | 3.326  | 1.00  | 57.05 | H0   |    |
| ANISOU 6575 HA SER C 14   | 7160    | 8650   | 5870   | -660  | 70    | 1580 | H0 |
| ATOM 6576 HB2 SER C 14    | -48.864 | 16.411 | 4.171  | 1.00  | 55.76 | H0   |    |
| ANISOU 6576 HB2 SER C 14  | 6850    | 8560   | 5780   | -520  | 20    | 1410 | H0 |
| ATOM 6577 HB3 SER C 14    | -47.784 | 15.369 | 3.640  | 1.00  | 55.41 | H0   |    |
| ANISOU 6577 HB3 SER C 14  | 6800    | 8650   | 5600   | -620  | 80    | 1270 | H0 |
| ATOM 6578 N ARG C 15      | -45.144 | 18.050 | 3.195  | 1.00  | 57.39 | N0   |    |
| ANISOU 6578 N ARG C 15    | 7210    | 8810   | 5790   | -860  | 250   | 1420 | N0 |
| ATOM 6579 CA ARG C 15     | -43.659 | 17.979 | 3.218  | 1.00  | 58.07 | C0   |    |
| ANISOU 6579 CA ARG C 15   | 7280    | 8970   | 5820   | -980  | 360   | 1320 | C0 |
| ATOM 6580 C ARG C 15      | -43.216 | 17.897 | 4.677  | 1.00  | 55.19 | C0   |    |
| ANISOU 6580 C ARG C 15    | 6870    | 8500   | 5610   | -910  | 410   | 1200 | C0 |
| ATOM 6581 O ARG C 15      | -43.061 | 18.922 | 5.334  | 1.00  | 55.15 | O0   |    |
| ANISOU 6581 O ARG C 15    | 6920    | 8340   | 5700   | -920  | 430   | 1260 | O0 |
| ATOM 6582 CB ARG C 15     | -43.065 | 19.195 | 2.500  | 1.00  | 61.34 | C0   |    |
| ANISOU 6582 CB ARG C 15   | 7780    | 9380   | 6140   | -1130 | 380   | 1470 | C0 |
| ATOM 6583 CG ARG C 15     | -43.510 | 19.353 | 1.052  | 1.00  | 64.94 | C0   |    |
| ANISOU 6583 CG ARG C 15   | 8290    | 9950   | 6440   | -1200 | 320   | 1610 | C0 |
| ATOM 6584 CD ARG C 15     | -43.183 | 18.150 | 0.179  | 1.00  | 67.08 | C0   |    |
| ANISOU 6584 CD ARG C 15   | 8490    | 10460  | 6540   | -1240 | 350   | 1490 | C0 |
| ATOM 6585 NE ARG C 15     | -44.308 | 17.232 | 0.014  | 1.00  | 68.26 | N0   |    |
| ANISOU 6585 NE ARG C 15   | 8600    | 10640  | 6700   | -1130 | 260   | 1470 | N0 |

|                           |         |        |        |       |       |      |    |
|---------------------------|---------|--------|--------|-------|-------|------|----|
| ATOM 6586 CZ ARG C 15     | -44.289 | 16.109 | -0.704 | 1.00  | 69.48 |      | C0 |
| ANISOU 6586 CZ ARG C 15   | 8710    | 10970  | 6720   | -1140 | 260   | 1360 | C0 |
| ATOM 6587 NH1 ARG C 15    | -43.189 | 15.732 | -1.337 | 1.00  | 71.12 |      | N0 |
| ANISOU 6587 NH1 ARG C 15  | 8890    | 11360  | 6780   | -1240 | 340   | 1270 | N0 |
| ATOM 6588 NH2 ARG C 15    | -45.376 | 15.358 | -0.779 | 1.00  | 69.29 |      | N0 |
| ANISOU 6588 NH2 ARG C 15  | 8660    | 10950  | 6710   | -1050 | 170   | 1350 | N0 |
| ATOM 6589 H ARG C 15      | -45.468 | 18.822 | 3.553  | 1.00  | 57.68 |      | H0 |
| ANISOU 6589 H ARG C 15    | 7290    | 8720   | 5910   | -830  | 230   | 1510 | H0 |
| ATOM 6590 HA ARG C 15     | -43.374 | 17.163 | 2.750  | 1.00  | 57.86 |      | H0 |
| ANISOU 6590 HA ARG C 15   | 7200    | 9090   | 5700   | -1000 | 370   | 1240 | H0 |
| ATOM 6591 HB2 ARG C 15    | -43.321 | 20.001 | 2.994  | 1.00  | 61.55 |      | H0 |
| ANISOU 6591 HB2 ARG C 15  | 7860    | 9260   | 6270   | -1100 | 360   | 1550 | H0 |
| ATOM 6592 HB3 ARG C 15    | -42.088 | 19.125 | 2.524  | 1.00  | 61.54 |      | H0 |
| ANISOU 6592 HB3 ARG C 15  | 7780    | 9480   | 6120   | -1210 | 460   | 1400 | H0 |
| ATOM 6593 HG2 ARG C 15    | -44.478 | 19.507 | 1.030  | 1.00  | 64.99 |      | H0 |
| ANISOU 6593 HG2 ARG C 15  | 8320    | 9880   | 6490   | -1120 | 240   | 1690 | H0 |
| ATOM 6594 HG3 ARG C 15    | -43.074 | 20.145 | 0.670  | 1.00  | 66.08 |      | H0 |
| ANISOU 6594 HG3 ARG C 15  | 8500    | 10080  | 6530   | -1310 | 340   | 1710 | H0 |
| ATOM 6595 HD2 ARG C 15    | -42.900 | 18.468 | -0.705 | 1.00  | 68.28 |      | H0 |
| ANISOU 6595 HD2 ARG C 15  | 8680    | 10700  | 6560   | -1350 | 360   | 1570 | H0 |
| ATOM 6596 HD3 ARG C 15    | -42.430 | 17.663 | 0.576  | 1.00  | 66.35 |      | H0 |
| ANISOU 6596 HD3 ARG C 15  | 8330    | 10420  | 6450   | -1250 | 420   | 1360 | H0 |
| ATOM 6597 HE ARG C 15     | -45.055 | 17.440 | 0.407  | 1.00  | 67.81 |      | H0 |
| ANISOU 6597 HE ARG C 15   | 8560    | 10480  | 6730   | -1050 | 210   | 1520 | H0 |
| ATOM 6598 HH11 ARG C 15   | -42.463 | 16.223 | -1.292 | 1.00  | 71.09 |      | H0 |
| ANISOU 6598 HH11 ARG C 15 | 8890    | 11360  | 6760   | -1310 | 400   | 1270 | H0 |
| ATOM 6599 HH12 ARG C 15   | -43.188 | 14.987 | -1.804 | 1.00  | 70.79 |      | H0 |
| ANISOU 6599 HH12 ARG C 15 | 8820    | 11430  | 6650   | -1240 | 340   | 1190 | H0 |
| ATOM 6600 HH21 ARG C 15   | -46.110 | 15.604 | -0.359 | 1.00  | 68.76 |      | H0 |
| ANISOU 6600 HH21 ARG C 15 | 8600    | 10780  | 6740   | -980  | 120   | 1410 | H0 |
| ATOM 6601 HH22 ARG C 15   | -45.365 | 14.614 | -1.250 | 1.00  | 69.22 |      | H0 |
| ANISOU 6601 HH22 ARG C 15 | 8640    | 11050  | 6610   | -1060 | 170   | 1280 | H0 |
| ATOM 6602 N PRO C 16      | -43.023 | 16.682 | 5.243  | 1.00  | 52.67 |      | N0 |
| ANISOU 6602 N PRO C 16    | 6470    | 8240   | 5310   | -840  | 430   | 1020 | N0 |
| ATOM 6603 CA PRO C 16     | -42.724 | 16.536 | 6.669  | 1.00  | 51.08 |      | C0 |
| ANISOU 6603 CA PRO C 16   | 6230    | 7920   | 5250   | -770  | 460   | 910  | C0 |
| ATOM 6604 C PRO C 16      | -41.542 | 17.390 | 7.154  | 1.00  | 51.25 |      | C0 |
| ANISOU 6604 C PRO C 16    | 6260    | 7910   | 5300   | -860  | 540   | 900  | C0 |
| ATOM 6605 O PRO C 16      | -41.562 | 17.803 | 8.292  | 1.00  | 50.02 |      | O0 |
| ANISOU 6605 O PRO C 16    | 6120    | 7610   | 5280   | -810  | 550   | 870  | O0 |
| ATOM 6606 CB PRO C 16     | -42.394 | 15.043 | 6.820  | 1.00  | 50.06 |      | C0 |
| ANISOU 6606 CB PRO C 16   | 6030    | 7910   | 5080   | -720  | 470   | 730  | C0 |
| ATOM 6607 CG PRO C 16     | -43.146 | 14.378 | 5.685  | 1.00  | 50.49 |      | C0 |
| ANISOU 6607 CG PRO C 16   | 6090    | 8070   | 5020   | -720  | 410   | 770  | C0 |
| ATOM 6608 CD PRO C 16     | -43.108 | 15.384 | 4.553  | 1.00  | 52.40 |      | C0 |
| ANISOU 6608 CD PRO C 16   | 6390    | 8360   | 5160   | -830  | 410   | 920  | C0 |
| ATOM 6609 HA PRO C 16     | -43.534 | 16.749 | 7.195  | 1.00  | 50.65 |      | H0 |
| ANISOU 6609 HA PRO C 16   | 6190    | 7760   | 5290   | -700  | 420   | 950  | H0 |
| ATOM 6610 HB2 PRO C 16    | -41.429 | 14.886 | 6.738  | 1.00  | 50.25 |      | H0 |
| ANISOU 6610 HB2 PRO C 16  | 6030    | 8010   | 5060   | -770  | 520   | 650  | H0 |
| ATOM 6611 HB3 PRO C 16    | -42.699 | 14.703 | 7.688  | 1.00  | 49.12 |      | H0 |
| ANISOU 6611 HB3 PRO C 16  | 5900    | 7710   | 5050   | -650  | 450   | 680  | H0 |
| ATOM 6612 HG2 PRO C 16    | -42.709 | 13.543 | 5.422  | 1.00  | 50.53 |      | H0 |
| ANISOU 6612 HG2 PRO C 16  | 6070    | 8170   | 4950   | -720  | 420   | 660  | H0 |

|                           |         |        |       |       |       |      |    |
|---------------------------|---------|--------|-------|-------|-------|------|----|
| ATOM 6613 HG3 PRO C 16    | -44.069 | 14.184 | 5.946 | 1.00  | 50.16 | H0   |    |
| ANISOU 6613 HG3 PRO C 16  | 6060    | 7970   | 5030  | -660  | 350   | 800  | H0 |
| ATOM 6614 HD2 PRO C 16    | -42.332 | 15.241 | 3.982 | 1.00  | 52.94 | H0   |    |
| ANISOU 6614 HD2 PRO C 16  | 6440    | 8550   | 5130  | -900  | 450   | 880  | H0 |
| ATOM 6615 HD3 PRO C 16    | -43.916 | 15.328 | 4.011 | 1.00  | 52.72 | H0   |    |
| ANISOU 6615 HD3 PRO C 16  | 6450    | 8420   | 5170  | -810  | 350   | 1000 | H0 |
| ATOM 6616 N ASP C 17      | -40.563 | 17.643 | 6.281 | 1.00  | 52.13 | N0   |    |
| ANISOU 6616 N ASP C 17    | 6370    | 8160   | 5280  | -990  | 600   | 910  | N0 |
| ATOM 6617 CA ASP C 17     | -39.289 | 18.332 | 6.621 | 1.00  | 52.96 | C0   |    |
| ANISOU 6617 CA ASP C 17   | 6470    | 8280   | 5380  | -1110 | 680   | 880  | C0 |
| ATOM 6618 C ASP C 17      | -39.363 | 19.830 | 6.289 | 1.00  | 54.01 | C0   |    |
| ANISOU 6618 C ASP C 17    | 6720    | 8290   | 5510  | -1230 | 680   | 1060 | C0 |
| ATOM 6619 O ASP C 17      | -38.312 | 20.483 | 6.368 | 1.00  | 54.58 | O0   |    |
| ANISOU 6619 O ASP C 17    | 6800    | 8390   | 5550  | -1370 | 750   | 1060 | O0 |
| ATOM 6620 CB ASP C 17     | -38.120 | 17.675 | 5.882 | 1.00  | 54.26 | C0   |    |
| ANISOU 6620 CB ASP C 17   | 6540    | 8690   | 5380  | -1200 | 760   | 760  | C0 |
| ATOM 6621 CG ASP C 17     | -37.915 | 16.210 | 6.237 | 1.00  | 53.69 | C0   |    |
| ANISOU 6621 CG ASP C 17   | 6370    | 8710   | 5320  | -1070 | 760   | 560  | C0 |
| ATOM 6622 OD1 ASP C 17    | -38.031 | 15.868 | 7.434 | 1.00  | 52.56 | O0   |    |
| ANISOU 6622 OD1 ASP C 17  | 6210    | 8450   | 5310  | -970  | 740   | 480  | O0 |
| ATOM 6623 OD2 ASP C 17    | -37.634 | 15.426 | 5.314 | 1.00  | 54.86 | O0   |    |
| ANISOU 6623 OD2 ASP C 17  | 6470    | 9040   | 5320  | -1080 | 770   | 490  | O0 |
| ATOM 6624 H ASP C 17      | -40.610 | 17.391 | 5.408 | 1.00  | 52.89 | H0   |    |
| ANISOU 6624 H ASP C 17    | 6470    | 8360   | 5270  | -1030 | 590   | 930  | H0 |
| ATOM 6625 HA ASP C 17     | -39.135 | 18.235 | 7.589 | 1.00  | 52.11 | H0   |    |
| ANISOU 6625 HA ASP C 17   | 6340    | 8090   | 5370  | -1050 | 700   | 800  | H0 |
| ATOM 6626 HB2 ASP C 17    | -38.276 | 17.739 | 4.919 | 1.00  | 55.18 | H0   |    |
| ANISOU 6626 HB2 ASP C 17  | 6680    | 8890   | 5400  | -1260 | 750   | 830  | H0 |
| ATOM 6627 HB3 ASP C 17    | -37.294 | 18.158 | 6.091 | 1.00  | 54.74 | H0   |    |
| ANISOU 6627 HB3 ASP C 17  | 6590    | 8770   | 5440  | -1290 | 810   | 750  | H0 |
| ATOM 6628 N VAL C 18      | -40.540 | 20.359 | 5.931 | 1.00  | 54.44 | N0   |    |
| ANISOU 6628 N VAL C 18    | 6870    | 8220   | 5600  | -1170 | 600   | 1220 | N0 |
| ATOM 6629 CA VAL C 18     | -40.720 | 21.784 | 5.515 | 1.00  | 56.10 | C0   |    |
| ANISOU 6629 CA VAL C 18   | 7220    | 8300   | 5800  | -1270 | 560   | 1410 | C0 |
| ATOM 6630 C VAL C 18      | -41.831 | 22.417 | 6.356 | 1.00  | 55.84 | C0   |    |
| ANISOU 6630 C VAL C 18    | 7260    | 8020   | 5940  | -1120 | 490   | 1480 | C0 |
| ATOM 6631 O VAL C 18      | -42.985 | 21.955 | 6.254 | 1.00  | 54.85 | O0   |    |
| ANISOU 6631 O VAL C 18    | 7110    | 7880   | 5850  | -980  | 420   | 1510 | O0 |
| ATOM 6632 CB VAL C 18     | -41.038 | 21.910 | 4.012 | 1.00  | 57.79 | C0   |    |
| ANISOU 6632 CB VAL C 18   | 7480    | 8620   | 5850  | -1350 | 520   | 1550 | C0 |
| ATOM 6633 CG1 VAL C 18    | -41.193 | 23.365 | 3.587 | 1.00  | 59.42 | C0   |    |
| ANISOU 6633 CG1 VAL C 18  | 7860    | 8680   | 6040  | -1450 | 480   | 1760 | C0 |
| ATOM 6634 CG2 VAL C 18    | -39.994 | 21.210 | 3.154 | 1.00  | 58.42 | C0   |    |
| ANISOU 6634 CG2 VAL C 18  | 7480    | 8970   | 5740  | -1490 | 600   | 1470 | C0 |
| ATOM 6635 H VAL C 18      | -41.313 | 19.880 | 5.917 | 1.00  | 53.88 | H0   |    |
| ANISOU 6635 H VAL C 18    | 6780    | 8140   | 5550  | -1080 | 550   | 1220 | H0 |
| ATOM 6636 HA VAL C 18     | -39.891 | 22.262 | 5.693 | 1.00  | 56.66 | H0   |    |
| ANISOU 6636 HA VAL C 18   | 7300    | 8370   | 5860  | -1370 | 620   | 1400 | H0 |
| ATOM 6637 HB VAL C 18     | -41.903 | 21.460 | 3.857 | 1.00  | 57.29 | H0   |    |
| ANISOU 6637 HB VAL C 18   | 7400    | 8560   | 5800  | -1250 | 460   | 1570 | H0 |
| ATOM 6638 HG11 VAL C 18   | -42.064 | 23.696 | 3.869 | 1.00  | 59.40 | H0   |    |
| ANISOU 6638 HG11 VAL C 18 | 7910    | 8530   | 6130  | -1340 | 410   | 1830 | H0 |
| ATOM 6639 HG12 VAL C 18   | -41.120 | 23.431 | 2.619 | 1.00  | 60.59 | H0   |    |
| ANISOU 6639 HG12 VAL C 18 | 8040    | 8920   | 6060  | -1540 | 470   | 1840 | H0 |

|                           |         |        |        |       |       |      |    |
|---------------------------|---------|--------|--------|-------|-------|------|----|
| ATOM 6640 HG13 VAL C 18   | -40.494 | 23.900 | 4.001  | 1.00  | 59.81 |      | H0 |
| ANISOU 6640 HG13 VAL C 18 | 7940    | 8670   | 6120   | -1540 | 520   | 1750 | H0 |
| ATOM 6641 HG21 VAL C 18   | -39.132 | 21.644 | 3.272  | 1.00  | 58.95 |      | H0 |
| ANISOU 6641 HG21 VAL C 18 | 7550    | 9060   | 5780   | -1600 | 660   | 1450 | H0 |
| ATOM 6642 HG22 VAL C 18   | -40.256 | 21.261 | 2.218  | 1.00  | 59.34 |      | H0 |
| ANISOU 6642 HG22 VAL C 18 | 7630    | 9160   | 5750   | -1540 | 570   | 1550 | H0 |
| ATOM 6643 HG23 VAL C 18   | -39.926 | 20.277 | 3.419  | 1.00  | 57.31 |      | H0 |
| ANISOU 6643 HG23 VAL C 18 | 7240    | 8910   | 5610   | -1410 | 620   | 1330 | H0 |
| ATOM 6644 N ILE C 19      | -41.487 | 23.451 | 7.131  | 1.00  | 56.67 |      | N0 |
| ANISOU 6644 N ILE C 19    | 7450    | 7950   | 6140   | -1150 | 510   | 1510 | N0 |
| ATOM 6645 CA ILE C 19     | -42.446 | 24.254 | 7.946  | 1.00  | 57.11 |      | C0 |
| ANISOU 6645 CA ILE C 19   | 7590    | 7750   | 6360   | -1010 | 450   | 1570 | C0 |
| ATOM 6646 C ILE C 19      | -43.457 | 24.905 | 7.003  | 1.00  | 59.27 |      | C0 |
| ANISOU 6646 C ILE C 19    | 7970    | 7950   | 6600   | -970  | 340   | 1770 | C0 |
| ATOM 6647 O ILE C 19      | -43.072 | 25.603 | 6.069  | 1.00  | 60.55 |      | O0 |
| ANISOU 6647 O ILE C 19    | 8240    | 8120   | 6650   | -1110 | 330   | 1900 | O0 |
| ATOM 6648 CB ILE C 19     | -41.709 | 25.288 | 8.825  | 1.00  | 57.42 |      | C0 |
| ANISOU 6648 CB ILE C 19   | 7720    | 7620   | 6480   | -1090 | 490   | 1560 | C0 |
| ATOM 6649 CG1 ILE C 19    | -42.663 | 25.935 | 9.832  | 1.00  | 57.43 |      | C0 |
| ANISOU 6649 CG1 ILE C 19  | 7790    | 7380   | 6650   | -910  | 430   | 1580 | C0 |
| ATOM 6650 CG2 ILE C 19    | -40.987 | 26.335 | 7.986  | 1.00  | 59.30 |      | C0 |
| ANISOU 6650 CG2 ILE C 19  | 8090    | 7820   | 6610   | -1300 | 490   | 1710 | C0 |
| ATOM 6651 CD1 ILE C 19    | -41.983 | 26.846 | 10.826 | 1.00  | 58.20 |      | C0 |
| ANISOU 6651 CD1 ILE C 19  | 7970    | 7300   | 6840   | -980  | 470   | 1540 | C0 |
| ATOM 6652 H ILE C 19      | -40.622 | 23.720 | 7.223  | 1.00  | 57.03 |      | H0 |
| ANISOU 6652 H ILE C 19    | 7500    | 8010   | 6160   | -1260 | 560   | 1490 | H0 |
| ATOM 6653 HA ILE C 19     | -42.919 | 23.644 | 8.536  | 1.00  | 55.93 |      | H0 |
| ANISOU 6653 HA ILE C 19   | 7360    | 7610   | 6280   | -890  | 440   | 1490 | H0 |
| ATOM 6654 HB ILE C 19     | -41.023 | 24.799 | 9.343  | 1.00  | 56.56 |      | H0 |
| ANISOU 6654 HB ILE C 19   | 7530    | 7590   | 6380   | -1120 | 550   | 1440 | H0 |
| ATOM 6655 HG12 ILE C 19   | -43.336 | 26.451 | 9.342  | 1.00  | 58.50 |      | H0 |
| ANISOU 6655 HG12 ILE C 19 | 8000    | 7440   | 6790   | -870  | 370   | 1690 | H0 |
| ATOM 6656 HG13 ILE C 19   | -43.128 | 25.226 | 10.323 | 1.00  | 56.23 |      | H0 |
| ANISOU 6656 HG13 ILE C 19 | 7540    | 7270   | 6550   | -800  | 430   | 1490 | H0 |
| ATOM 6657 HG21 ILE C 19   | -40.648 | 25.929 | 7.171  | 1.00  | 59.66 |      | H0 |
| ANISOU 6657 HG21 ILE C 19 | 8100    | 8030   | 6540   | -1390 | 510   | 1720 | H0 |
| ATOM 6658 HG22 ILE C 19   | -40.243 | 26.703 | 8.495  | 1.00  | 59.51 |      | H0 |
| ANISOU 6658 HG22 ILE C 19 | 8140    | 7810   | 6660   | -1390 | 540   | 1660 | H0 |
| ATOM 6659 HG23 ILE C 19   | -41.604 | 27.052 | 7.757  | 1.00  | 60.37 |      | H0 |
| ANISOU 6659 HG23 ILE C 19 | 8340    | 7820   | 6780   | -1260 | 430   | 1830 | H0 |
| ATOM 6660 HD11 ILE C 19   | -41.212 | 26.393 | 11.208 | 1.00  | 57.29 |      | H0 |
| ANISOU 6660 HD11 ILE C 19 | 7780    | 7280   | 6710   | -1040 | 540   | 1430 | H0 |
| ATOM 6661 HD12 ILE C 19   | -42.607 | 27.076 | 11.535 | 1.00  | 57.76 |      | H0 |
| ANISOU 6661 HD12 ILE C 19 | 7940    | 7120   | 6890   | -850  | 450   | 1510 | H0 |
| ATOM 6662 HD13 ILE C 19   | -41.691 | 27.658 | 10.377 | 1.00  | 59.48 |      | H0 |
| ANISOU 6662 HD13 ILE C 19 | 8250    | 7390   | 6960   | -1080 | 460   | 1640 | H0 |
| ATOM 6663 N PRO C 20      | -44.780 | 24.694 | 7.214  | 1.00  | 59.91 |      | N0 |
| ANISOU 6663 N PRO C 20    | 8020    | 7980   | 6760   | -780  | 260   | 1790 | N0 |
| ATOM 6664 CA PRO C 20     | -45.807 | 25.247 | 6.329  | 1.00  | 61.88 |      | C0 |
| ANISOU 6664 CA PRO C 20   | 8350    | 8180   | 6990   | -710  | 150   | 1960 | C0 |
| ATOM 6665 C PRO C 20      | -46.196 | 26.698 | 6.661  | 1.00  | 64.89 |      | C0 |
| ANISOU 6665 C PRO C 20    | 8900    | 8290   | 7470   | -650  | 90    | 2090 | C0 |
| ATOM 6666 O PRO C 20      | -47.331 | 26.926 | 7.042  | 1.00  | 65.18 |      | O0 |
| ANISOU 6666 O PRO C 20    | 8930    | 8220   | 7610   | -450  | 10    | 2110 | O0 |

|                           |         |        |       |       |       |      |    |
|---------------------------|---------|--------|-------|-------|-------|------|----|
| ATOM 6667 CB PRO C 20     | -46.979 | 24.284 | 6.573 | 1.00  | 60.21 | C0   |    |
| ANISOU 6667 CB PRO C 20   | 8000    | 8050   | 6830  | -530  | 100   | 1900 | C0 |
| ATOM 6668 CG PRO C 20     | -46.849 | 23.918 | 8.036 | 1.00  | 58.39 | C0   |    |
| ANISOU 6668 CG PRO C 20   | 7690    | 7760   | 6730  | -450  | 170   | 1730 | C0 |
| ATOM 6669 CD PRO C 20     | -45.358 | 23.888 | 8.304 | 1.00  | 57.64 | C0   |    |
| ANISOU 6669 CD PRO C 20   | 7610    | 7700   | 6600  | -620  | 270   | 1640 | C0 |
| ATOM 6670 HA PRO C 20     | -45.510 | 25.177 | 5.387 | 1.00  | 62.70 | H0   |    |
| ANISOU 6670 HA PRO C 20   | 8480    | 8380   | 6960  | -820  | 140   | 2030 | H0 |
| ATOM 6671 HB2 PRO C 20    | -47.840 | 24.718 | 6.395 | 1.00  | 61.11 | H0   |    |
| ANISOU 6671 HB2 PRO C 20  | 8150    | 8090   | 6970  | -430  | 20    | 1990 | H0 |
| ATOM 6672 HB3 PRO C 20    | -46.902 | 23.488 | 6.006 | 1.00  | 59.87 | H0   |    |
| ANISOU 6672 HB3 PRO C 20  | 7890    | 8170   | 6690  | -580  | 110   | 1870 | H0 |
| ATOM 6673 HG2 PRO C 20    | -47.289 | 24.585 | 8.601 | 1.00  | 58.74 | H0   |    |
| ANISOU 6673 HG2 PRO C 20  | 7780    | 7660   | 6870  | -360  | 140   | 1750 | H0 |
| ATOM 6674 HG3 PRO C 20    | -47.249 | 23.042 | 8.211 | 1.00  | 57.33 | H0   |    |
| ANISOU 6674 HG3 PRO C 20  | 7460    | 7730   | 6600  | -390  | 170   | 1650 | H0 |
| ATOM 6675 HD2 PRO C 20    | -45.150 | 24.278 | 9.173 | 1.00  | 57.55 | H0   |    |
| ANISOU 6675 HD2 PRO C 20  | 7620    | 7570   | 6670  | -590  | 300   | 1590 | H0 |
| ATOM 6676 HD3 PRO C 20    | -45.019 | 22.975 | 8.278 | 1.00  | 56.81 | H0   |    |
| ANISOU 6676 HD3 PRO C 20  | 7410    | 7730   | 6440  | -640  | 310   | 1550 | H0 |
| ATOM 6677 N THR C 21      | -45.253 | 27.634 | 6.516 | 1.00  | 67.80 | N0   |    |
| ANISOU 6677 N THR C 21    | 9410    | 8550   | 7800  | -810  | 110   | 2150 | N0 |
| ATOM 6678 CA THR C 21     | -45.486 | 29.097 | 6.642 | 1.00  | 71.93 | C0   |    |
| ANISOU 6678 CA THR C 21   | 10140   | 8790   | 8400  | -790  | 40    | 2290 | C0 |
| ATOM 6679 C THR C 21      | -45.858 | 29.652 | 5.266 | 1.00  | 76.60 | C0   |    |
| ANISOU 6679 C THR C 21    | 10860   | 9370   | 8870  | -850  | -60   | 2510 | C0 |
| ATOM 6680 O THR C 21      | -44.962 | 29.713 | 4.401 | 1.00  | 76.77 | O0   |    |
| ANISOU 6680 O THR C 21    | 10940   | 9500   | 8730  | -1080 | -30   | 2580 | O0 |
| ATOM 6681 CB THR C 21     | -44.261 | 29.858 | 7.168 | 1.00  | 73.01 | C0   |    |
| ANISOU 6681 CB THR C 21   | 10390   | 8800   | 8540  | -970  | 110   | 2270 | C0 |
| ATOM 6682 OG1 THR C 21    | -43.189 | 29.702 | 6.236 | 1.00  | 74.35 | O0   |    |
| ANISOU 6682 OG1 THR C 21  | 10570   | 9150   | 8530  | -1230 | 170   | 2310 | O0 |
| ATOM 6683 CG2 THR C 21    | -43.819 | 29.411 | 8.544 | 1.00  | 70.81 | C0   |    |
| ANISOU 6683 CG2 THR C 21  | 10000   | 8530   | 8380  | -930  | 210   | 2060 | C0 |
| ATOM 6684 H THR C 21      | -44.386 | 27.438 | 6.320 | 1.00  | 67.76 | H0   |    |
| ANISOU 6684 H THR C 21    | 9390    | 8630   | 7720  | -960  | 180   | 2120 | H0 |
| ATOM 6685 HA THR C 21     | -46.239 | 29.240 | 7.260 | 1.00  | 71.84 | H0   |    |
| ANISOU 6685 HA THR C 21   | 10120   | 8680   | 8500  | -620  | 0     | 2260 | H0 |
| ATOM 6686 HB THR C 21     | -44.497 | 30.815 | 7.214 | 1.00  | 74.40 | H0   |    |
| ANISOU 6686 HB THR C 21   | 10720   | 8780   | 8770  | -950  | 50    | 2360 | H0 |
| ATOM 6687 HG21 THR C 21   | -44.480 | 29.687 | 9.204 | 1.00  | 70.75 | H0   |    |
| ANISOU 6687 HG21 THR C 21 | 10010   | 8380   | 8490  | -770  | 170   | 2040 | H0 |
| ATOM 6688 HG22 THR C 21   | -42.960 | 29.816 | 8.757 | 1.00  | 71.30 | H0   |    |
| ANISOU 6688 HG22 THR C 21 | 10120   | 8550   | 8420  | -1070 | 260   | 2050 | H0 |
| ATOM 6689 HG23 THR C 21   | -43.732 | 28.442 | 8.559 | 1.00  | 69.48 | H0   |    |
| ANISOU 6689 HG23 THR C 21 | 9690    | 8530   | 8180  | -920  | 250   | 1970 | H0 |
| ATOM 6690 N GLN C 22      | -47.127 | 30.029 | 5.087 | 1.00  | 80.61 | N0   |    |
| ANISOU 6690 N GLN C 22    | 11410   | 9770   | 9440  | -640  | -190  | 2610 | N0 |
| ATOM 6691 CA GLN C 22     | -47.644 | 30.735 | 3.884 | 1.00  | 84.52 | C0   |    |
| ANISOU 6691 CA GLN C 22   | 12060   | 10210  | 9840  | -650  | -320  | 2830 | C0 |
| ATOM 6692 C GLN C 22      | -47.354 | 32.232 | 4.047 | 1.00  | 86.96 | C0   |    |
| ANISOU 6692 C GLN C 22    | 12630   | 10210  | 10200 | -700  | -380  | 2960 | C0 |
| ATOM 6693 O GLN C 22      | -47.801 | 32.800 | 5.061 | 1.00  | 88.51 | O0   |    |
| ANISOU 6693 O GLN C 22    | 12880   | 10190  | 10570 | -520  | -400  | 2900 | O0 |

|                           |         |        |        |       |        |      |    |
|---------------------------|---------|--------|--------|-------|--------|------|----|
| ATOM 6694 CB GLN C 22     | -49.147 | 30.484 | 3.713  | 1.00  | 85.80  |      | C0 |
| ANISOU 6694 CB GLN C 22   | 12140   | 10400  | 10060  | -390  | -440   | 2870 | C0 |
| ATOM 6695 CG GLN C 22     | -49.546 | 29.011 | 3.740  | 1.00  | 84.45  |      | C0 |
| ANISOU 6695 CG GLN C 22   | 11720   | 10510  | 9860   | -340  | -390   | 2730 | C0 |
| ATOM 6696 CD GLN C 22     | -48.939 | 28.212 | 2.611  | 1.00  | 84.93  |      | C0 |
| ANISOU 6696 CD GLN C 22   | 11730   | 10820  | 9720   | -540  | -350   | 2760 | C0 |
| ATOM 6697 OE1 GLN C 22    | -48.809 | 28.688 | 1.483  | 1.00  | 87.47  |      | O0 |
| ANISOU 6697 OE1 GLN C 22  | 12170   | 11150  | 9910   | -660  | -410   | 2930 | O0 |
| ATOM 6698 NE2 GLN C 22    | -48.566 | 26.978 | 2.909  | 1.00  | 83.15  |      | N0 |
| ANISOU 6698 NE2 GLN C 22  | 11330   | 10790  | 9470   | -580  | -250   | 2580 | N0 |
| ATOM 6699 H GLN C 22      | -47.766 | 29.884 | 5.720  | 1.00  | 79.54  |      | H0 |
| ANISOU 6699 H GLN C 22    | 11210   | 9600   | 9410   | -480  | -200   | 2540 | H0 |
| ATOM 6700 HA GLN C 22     | -47.167 | 30.399 | 3.091  | 1.00  | 84.62  |      | H0 |
| ANISOU 6700 HA GLN C 22   | 12060   | 10370  | 9710   | -810  | -290   | 2870 | H0 |
| ATOM 6701 HB2 GLN C 22    | -49.622 | 30.954 | 4.429  | 1.00  | 85.92  |      | H0 |
| ANISOU 6701 HB2 GLN C 22  | 12180   | 10260  | 10210  | -240  | -470   | 2850 | H0 |
| ATOM 6702 HB3 GLN C 22    | -49.431 | 30.875 | 2.861  | 1.00  | 87.26  |      | H0 |
| ANISOU 6702 HB3 GLN C 22  | 12420   | 10570  | 10170  | -410  | -530   | 3020 | H0 |
| ATOM 6703 HG2 GLN C 22    | -49.270 | 28.618 | 4.595  | 1.00  | 82.93  |      | H0 |
| ANISOU 6703 HG2 GLN C 22  | 11440   | 10320  | 9750   | -320  | -310   | 2590 | H0 |
| ATOM 6704 HG3 GLN C 22    | -50.523 | 28.945 | 3.685  | 1.00  | 84.70  |      | H0 |
| ANISOU 6704 HG3 GLN C 22  | 11700   | 10550  | 9940   | -180  | -470   | 2760 | H0 |
| ATOM 6705 HE21 GLN C 22   | -47.942 | 26.576 | 2.429  | 1.00  | 82.83  |      | H0 |
| ANISOU 6705 HE21 GLN C 22 | 11270   | 10880  | 9330   | -720  | -200   | 2560 | H0 |
| ATOM 6706 HE22 GLN C 22   | -48.941 | 26.553 | 3.588  | 1.00  | 81.84  |      | H0 |
| ANISOU 6706 HE22 GLN C 22 | 11070   | 10630  | 9400   | -470  | -230   | 2480 | H0 |
| ATOM 6707 N ARG C 23      | -46.621 | 32.830 | 3.100  | 1.00  | 88.36  |      | N0 |
| ANISOU 6707 N ARG C 23    | 12980   | 10370  | 10230  | -940  | -390   | 3120 | N0 |
| ATOM 6708 CA ARG C 23     | -46.301 | 34.287 | 3.043  | 1.00  | 90.76  |      | C0 |
| ANISOU 6708 CA ARG C 23   | 13580   | 10360  | 10540  | -1030 | -460   | 3270 | C0 |
| ATOM 6709 C ARG C 23      | -45.506 | 34.711 | 4.290  | 1.00  | 89.10  |      | C0 |
| ANISOU 6709 C ARG C 23    | 13410   | 9990   | 10450  | -1090 | -370   | 3140 | C0 |
| ATOM 6710 O ARG C 23      | -45.776 | 35.811 | 4.825  | 1.00  | 90.24  |      | O0 |
| ANISOU 6710 O ARG C 23    | 13750   | 9820   | 10710  | -1000 | -450   | 3190 | O0 |
| ATOM 6711 CB ARG C 23     | -47.585 | 35.110 | 2.860  | 1.00  | 93.37  |      | C0 |
| ANISOU 6711 CB ARG C 23   | 14050   | 10460  | 10960  | -780  | -650   | 3420 | C0 |
| ATOM 6712 CG ARG C 23     | -47.651 | 35.888 | 1.553  | 1.00  | 96.58  |      | C0 |
| ANISOU 6712 CG ARG C 23   | 14690   | 10790  | 11220  | -900  | -780   | 3680 | C0 |
| ATOM 6713 CD ARG C 23     | -46.481 | 36.843 | 1.388  | 1.00  | 98.87  |      | C0 |
| ANISOU 6713 CD ARG C 23   | 15220   | 10910  | 11430  | -1200 | -750   | 3790 | C0 |
| ATOM 6714 NE ARG C 23     | -46.687 | 37.832 | 0.336  | 1.00  | 102.74 |      | N0 |
| ANISOU 6714 NE ARG C 23   | 15990   | 11230  | 11810  | -1280 | -910   | 4060 | N0 |
| ATOM 6715 CZ ARG C 23     | -46.591 | 37.597 | -0.974 | 1.00  | 104.43 |      | C0 |
| ANISOU 6715 CZ ARG C 23   | 16220   | 11640  | 11820  | -1450 | -940   | 4210 | C0 |
| ATOM 6716 NH1 ARG C 23    | -46.793 | 38.583 | -1.834 | 1.00  | 107.38 |      | N0 |
| ANISOU 6716 NH1 ARG C 23  | 16880   | 11820  | 12100  | -1520 | -1100  | 4460 | N0 |
| ATOM 6717 NH2 ARG C 23    | -46.304 | 36.386 | -1.425 | 1.00  | 102.77 |      | N0 |
| ANISOU 6717 NH2 ARG C 23  | 15770   | 11800  | 11480  | -1540 | -830   | 4110 | N0 |
| ATOM 6718 H ARG C 23      | -46.260 | 32.363 | 2.407  | 1.00  | 88.29  |      | H0 |
| ANISOU 6718 H ARG C 23    | 12920   | 10540  | 10090  | -1070 | -360   | 3140 | H0 |
| ATOM 6719 HA ARG C 23     | -45.727 | 34.430 | 2.257  | 1.00  | 91.73  |      | H0 |
| ANISOU 6719 HA ARG C 23   | 13770   | 10560  | 10530  | -1230 | -460   | 3370 | H0 |
| ATOM 6720 HB2 ARG C 23    | -48.353 | 34.503 | 2.900  | 1.00  | 92.31  |      | H0 |
| ANISOU 6720 HB2 ARG C 23  | 13770   | 10440  | 10870  | -600  | -670   | 3370 | H0 |

|                           |         |        |        |       |        |      |    |
|---------------------------|---------|--------|--------|-------|--------|------|----|
| ATOM 6721 HB3 ARG C 23    | -47.667 | 35.741 | 3.604  | 1.00  | 93.72  |      | H0 |
| ANISOU 6721 HB3 ARG C 23  | 14190   | 10290  | 11130  | -690  | -660   | 3390 | H0 |
| ATOM 6722 HG2 ARG C 23    | -47.657 | 35.258 | 0.802  | 1.00  | 96.23  |      | H0 |
| ANISOU 6722 HG2 ARG C 23  | 14550   | 10960  | 11060  | -970  | -770   | 3710 | H0 |
| ATOM 6723 HG3 ARG C 23    | -48.487 | 36.401 | 1.523  | 1.00  | 97.85  |      | H0 |
| ANISOU 6723 HG3 ARG C 23  | 14930   | 10790  | 11450  | -710  | -900   | 3760 | H0 |
| ATOM 6724 HD2 ARG C 23    | -46.331 | 37.311 | 2.237  | 1.00  | 98.88  |      | H0 |
| ANISOU 6724 HD2 ARG C 23  | 15290   | 10730  | 11550  | -1150 | -730   | 3720 | H0 |
| ATOM 6725 HD3 ARG C 23    | -45.671 | 36.329 | 1.186  | 1.00  | 98.00  |      | H0 |
| ANISOU 6725 HD3 ARG C 23  | 15020   | 11000  | 11210  | -1400 | -640   | 3730 | H0 |
| ATOM 6726 HE ARG C 23     | -46.874 | 38.646 | 0.582  | 1.00  | 104.22 |      | H0 |
| ANISOU 6726 HE ARG C 23   | 16350   | 11170  | 12070  | -1220 | -990   | 4120 | H0 |
| ATOM 6727 HH11 ARG C 23   | -46.987 | 39.388 | -1.541 | 1.00  | 108.81 |      | H0 |
| ANISOU 6727 HH11 ARG C 23 | 17240   | 11750  | 12360  | -1450 | -1180  | 4530 | H0 |
| ATOM 6728 HH12 ARG C 23   | -46.737 | 38.430 | -2.698 | 1.00  | 108.15 |      | H0 |
| ANISOU 6728 HH12 ARG C 23 | 16990   | 12050  | 12050  | -1630 | -1120  | 4570 | H0 |
| ATOM 6729 HH21 ARG C 23   | -46.166 | 35.723 | -0.866 | 1.00  | 100.63 |      | H0 |
| ANISOU 6729 HH21 ARG C 23 | 15320   | 11640  | 11270  | -1500 | -740   | 3950 | H0 |
| ATOM 6730 HH22 ARG C 23   | -46.247 | 36.246 | -2.293 | 1.00  | 103.40 |      | H0 |
| ANISOU 6730 HH22 ARG C 23 | 15860   | 12010  | 11420  | -1650 | -860   | 4210 | H0 |
| ATOM 6731 N ASP C 24      | -44.555 | 33.874 | 4.722  | 1.00  | 85.87  |      | N0 |
| ANISOU 6731 N ASP C 24    | 12830   | 9790   | 10010  | -1230 | -220   | 2970 | N0 |
| ATOM 6732 CA ASP C 24     | -43.600 | 34.142 | 5.834  | 1.00  | 84.52  |      | C0 |
| ANISOU 6732 CA ASP C 24   | 12670   | 9530   | 9920   | -1340 | -110   | 2830 | C0 |
| ATOM 6733 C ASP C 24      | -44.341 | 34.523 | 7.127  | 1.00  | 82.81  |      | C0 |
| ANISOU 6733 C ASP C 24    | 12470   | 9080   | 9910   | -1070 | -140   | 2720 | C0 |
| ATOM 6734 O ASP C 24      | -43.780 | 35.310 | 7.924  | 1.00  | 83.66  |      | O0 |
| ANISOU 6734 O ASP C 24    | 12710   | 8980   | 10100  | -1140 | -120   | 2680 | O0 |
| ATOM 6735 CB ASP C 24     | -42.596 | 35.232 | 5.448  | 1.00  | 87.16  |      | C0 |
| ANISOU 6735 CB ASP C 24   | 13240   | 9720   | 10150  | -1630 | -110   | 2960 | C0 |
| ATOM 6736 CG ASP C 24     | -41.409 | 35.301 | 6.392  | 1.00  | 87.19  |      | C0 |
| ANISOU 6736 CG ASP C 24   | 13210   | 9730   | 10190  | -1810 | 10     | 2810 | C0 |
| ATOM 6737 OD1 ASP C 24    | -40.690 | 34.288 | 6.496  | 1.00  | 85.65  |      | O0 |
| ANISOU 6737 OD1 ASP C 24  | 12790   | 9820   | 9930   | -1900 | 130    | 2670 | O0 |
| ATOM 6738 OD2 ASP C 24    | -41.233 | 36.354 | 7.041  | 1.00  | 89.55  |      | O0 |
| ANISOU 6738 OD2 ASP C 24  | 13710   | 9740   | 10570  | -1840 | -20    | 2830 | O0 |
| ATOM 6739 H ASP C 24      | -44.428 | 33.057 | 4.341  | 1.00  | 84.95  |      | H0 |
| ANISOU 6739 H ASP C 24    | 12570   | 9900   | 9810   | -1270 | -170   | 2920 | H0 |
| ATOM 6740 HA ASP C 24     | -43.095 | 33.313 | 6.003  | 1.00  | 82.87  |      | H0 |
| ANISOU 6740 HA ASP C 24   | 12290   | 9520   | 9670   | -1400 | -10    | 2700 | H0 |
| ATOM 6741 HB2 ASP C 24    | -42.265 | 35.058 | 4.543  | 1.00  | 87.88  |      | H0 |
| ANISOU 6741 HB2 ASP C 24  | 13330   | 9960   | 10100  | -1780 | -110   | 3040 | H0 |
| ATOM 6742 HB3 ASP C 24    | -43.048 | 36.101 | 5.448  | 1.00  | 88.87  |      | H0 |
| ANISOU 6742 HB3 ASP C 24  | 13640   | 9700   | 10420  | -1560 | -210   | 3060 | H0 |
| ATOM 6743 N ARG C 25      | -45.540 | 33.971 | 7.348  | 1.00  | 79.88  |      | N0 |
| ANISOU 6743 N ARG C 25    | 11970   | 8750   | 9630   | -790  | -190   | 2670 | N0 |
| ATOM 6744 CA ARG C 25     | -46.328 | 34.159 | 8.597  | 1.00  | 77.52  |      | C0 |
| ANISOU 6744 CA ARG C 25   | 11640   | 8290   | 9530   | -520  | -210   | 2550 | C0 |
| ATOM 6745 C ARG C 25      | -45.984 | 33.022 | 9.555  | 1.00  | 72.02  |      | C0 |
| ANISOU 6745 C ARG C 25    | 10700   | 7790   | 8870   | -510  | -80    | 2320 | C0 |
| ATOM 6746 O ARG C 25      | -45.957 | 31.863 | 9.142  | 1.00  | 69.89  |      | O0 |
| ANISOU 6746 O ARG C 25    | 10240   | 7790   | 8520   | -540  | -30    | 2270 | O0 |
| ATOM 6747 CB ARG C 25     | -47.830 | 34.175 | 8.298  | 1.00  | 78.84  |      | C0 |
| ANISOU 6747 CB ARG C 25   | 11770   | 8430   | 9760   | -230  | -330   | 2620 | C0 |

|                           |         |        |        |      |       |      |    |
|---------------------------|---------|--------|--------|------|-------|------|----|
| ATOM 6748 CG ARG C 25     | -48.236 | 35.188 | 7.237  | 1.00 | 82.66 |      | C0 |
| ANISOU 6748 CG ARG C 25   | 12480   | 8740   | 10180  | -230 | -490  | 2850 | C0 |
| ATOM 6749 CD ARG C 25     | -49.719 | 35.184 | 6.910  | 1.00 | 84.13 |      | C0 |
| ANISOU 6749 CD ARG C 25   | 12620   | 8920   | 10430  | 70   | -620  | 2920 | C0 |
| ATOM 6750 NE ARG C 25     | -50.255 | 33.866 | 6.576  | 1.00 | 82.44 |      | N0 |
| ANISOU 6750 NE ARG C 25   | 12130   | 9030   | 10160  | 120  | -590  | 2860 | N0 |
| ATOM 6751 CZ ARG C 25     | -51.349 | 33.643 | 5.849  | 1.00 | 83.62 |      | C0 |
| ANISOU 6751 CZ ARG C 25   | 12210   | 9280   | 10280  | 280  | -700  | 2950 | C0 |
| ATOM 6752 NH1 ARG C 25    | -52.046 | 34.649 | 5.341  | 1.00 | 86.64 |      | N0 |
| ANISOU 6752 NH1 ARG C 25  | 12770   | 9470   | 10680  | 420  | -860  | 3120 | N0 |
| ATOM 6753 NH2 ARG C 25    | -51.740 | 32.400 | 5.620  | 1.00 | 82.03 |      | N0 |
| ANISOU 6753 NH2 ARG C 25  | 11770   | 9370   | 10020  | 300  | -660  | 2880 | N0 |
| ATOM 6754 H ARG C 25      | -45.946 | 33.425 | 6.743  | 1.00 | 79.56 |      | H0 |
| ANISOU 6754 H ARG C 25    | 11840   | 8860   | 9530   | -750 | -220  | 2710 | H0 |
| ATOM 6755 HA ARG C 25     | -46.072 | 35.016 | 9.004  | 1.00 | 78.56 |      | H0 |
| ANISOU 6755 HA ARG C 25   | 11930   | 8210   | 9710   | -550 | -230  | 2560 | H0 |
| ATOM 6756 HB2 ARG C 25    | -48.095 | 33.280 | 8.002  | 1.00 | 77.66 |      | H0 |
| ANISOU 6756 HB2 ARG C 25  | 11450   | 8490   | 9560   | -210 | -310  | 2580 | H0 |
| ATOM 6757 HB3 ARG C 25    | -48.312 | 34.374 | 9.127  | 1.00 | 78.73 |      | H0 |
| ANISOU 6757 HB3 ARG C 25  | 11740   | 8310   | 9860   | -60  | -340  | 2530 | H0 |
| ATOM 6758 HG2 ARG C 25    | -47.987 | 36.086 | 7.545  | 1.00 | 83.94 |      | H0 |
| ANISOU 6758 HG2 ARG C 25  | 12830   | 8670   | 10390  | -250 | -510  | 2890 | H0 |
| ATOM 6759 HG3 ARG C 25    | -47.735 | 35.008 | 6.415  | 1.00 | 82.86 |      | H0 |
| ANISOU 6759 HG3 ARG C 25  | 12530   | 8880   | 10080  | -410 | -480  | 2940 | H0 |
| ATOM 6760 HD2 ARG C 25    | -50.210 | 35.538 | 7.680  | 1.00 | 84.24 |      | H0 |
| ANISOU 6760 HD2 ARG C 25  | 12640   | 8800   | 10560  | 250  | -640  | 2850 | H0 |
| ATOM 6761 HD3 ARG C 25    | -49.872 | 35.792 | 6.156  | 1.00 | 85.91 |      | H0 |
| ANISOU 6761 HD3 ARG C 25  | 12990   | 9050   | 10600  | 50   | -720  | 3080 | H0 |
| ATOM 6762 HE ARG C 25     | -49.836 | 33.170 | 6.887  | 1.00 | 80.84 |      | H0 |
| ANISOU 6762 HE ARG C 25   | 11810   | 8970   | 9940   | 50   | -490  | 2750 | H0 |
| ATOM 6763 HH11 ARG C 25   | -51.800 | 35.478 | 5.487  | 1.00 | 87.79 |      | H0 |
| ANISOU 6763 HH11 ARG C 25 | 13090   | 9400   | 10860  | 410  | -890  | 3170 | H0 |
| ATOM 6764 HH12 ARG C 25   | -52.764 | 34.484 | 4.861  | 1.00 | 87.00 |      | H0 |
| ANISOU 6764 HH12 ARG C 25 | 12760   | 9590   | 10710  | 530  | -940  | 3180 | H0 |
| ATOM 6765 HH21 ARG C 25   | -51.280 | 31.726 | 5.951  | 1.00 | 80.32 |      | H0 |
| ANISOU 6765 HH21 ARG C 25 | 11450   | 9270   | 9790   | 220  | -570  | 2770 | H0 |
| ATOM 6766 HH22 ARG C 25   | -52.460 | 32.248 | 5.135  | 1.00 | 82.49 |      | H0 |
| ANISOU 6766 HH22 ARG C 25 | 11780   | 9500   | 10060  | 400  | -740  | 2940 | H0 |
| ATOM 6767 N PRO C 26      | -45.721 | 33.308 | 10.851 | 1.00 | 68.81 |      | N0 |
| ANISOU 6767 N PRO C 26    | 10300   | 7250   | 8590   | -470 | -20   | 2180 | N0 |
| ATOM 6768 CA PRO C 26     | -45.381 | 32.258 | 11.809 | 1.00 | 65.25 |      | C0 |
| ANISOU 6768 CA PRO C 26   | 9640    | 6970   | 8180   | -460 | 90    | 1980 | C0 |
| ATOM 6769 C PRO C 26      | -46.506 | 31.218 | 11.910 | 1.00 | 62.58 |      | C0 |
| ANISOU 6769 C PRO C 26    | 9100    | 6810   | 7870   | -240 | 80    | 1910 | C0 |
| ATOM 6770 O PRO C 26      | -47.664 | 31.599 | 11.867 | 1.00 | 63.47 |      | O0 |
| ANISOU 6770 O PRO C 26    | 9230    | 6830   | 8050   | -30  | -10   | 1970 | O0 |
| ATOM 6771 CB PRO C 26     | -45.178 | 32.994 | 13.145 | 1.00 | 65.42 |      | C0 |
| ANISOU 6771 CB PRO C 26   | 9760    | 6770   | 8330   | -410 | 120   | 1870 | C0 |
| ATOM 6772 CG PRO C 26     | -45.857 | 34.336 | 12.957 | 1.00 | 68.26 |      | C0 |
| ANISOU 6772 CG PRO C 26   | 10350   | 6830   | 8760   | -290 | 0     | 2000 | C0 |
| ATOM 6773 CD PRO C 26     | -45.765 | 34.639 | 11.475 | 1.00 | 70.35 |      | C0 |
| ANISOU 6773 CD PRO C 26   | 10730   | 7110   | 8890   | -420 | -70   | 2210 | C0 |
| ATOM 6774 HA PRO C 26     | -44.535 | 31.824 | 11.536 | 1.00 | 64.56 |      | H0 |
| ANISOU 6774 HA PRO C 26   | 9510    | 7030   | 8000   | -630 | 160   | 1960 | H0 |



|                           |         |        |        |      |       |      |    |
|---------------------------|---------|--------|--------|------|-------|------|----|
| ATOM 6775 HB2 PRO C 26    | -45.589 | 32.497 | 13.884 | 1.00 | 64.25 | H0   |    |
| ANISOU 6775 HB2 PRO C 26  | 9490    | 6680   | 8250   | -280 | 150   | 1750 | H0 |
| ATOM 6776 HB3 PRO C 26    | -44.224 | 33.112 | 13.337 | 1.00 | 65.38 | H0   |    |
| ANISOU 6776 HB3 PRO C 26  | 9780    | 6770   | 8290   | -580 | 180   | 1830 | H0 |
| ATOM 6777 HG2 PRO C 26    | -46.793 | 34.293 | 13.241 | 1.00 | 68.28 | H0   |    |
| ANISOU 6777 HG2 PRO C 26  | 10300   | 6800   | 8840   | -80  | -40   | 1970 | H0 |
| ATOM 6778 HG3 PRO C 26    | -45.403 | 35.029 | 13.478 | 1.00 | 69.09 | H0   |    |
| ANISOU 6778 HG3 PRO C 26  | 10580   | 6760   | 8900   | -350 | 20    | 1970 | H0 |
| ATOM 6779 HD2 PRO C 26    | -46.543 | 35.142 | 11.174 | 1.00 | 71.64 | H0   |    |
| ANISOU 6779 HD2 PRO C 26  | 10980   | 7150   | 9090   | -270 | -170  | 2300 | H0 |
| ATOM 6780 HD3 PRO C 26    | -44.959 | 35.147 | 11.270 | 1.00 | 71.23 | H0   |    |
| ANISOU 6780 HD3 PRO C 26  | 10960   | 7150   | 8950   | -610 | -60   | 2260 | H0 |
| ATOM 6781 N VAL C 27      | -46.135 | 29.939 | 11.997 | 1.00 | 59.21 | N0   |    |
| ANISOU 6781 N VAL C 27    | 8480    | 6630   | 7390   | -300 | 160   | 1800 | N0 |
| ATOM 6782 CA VAL C 27     | -47.061 | 28.817 | 12.325 | 1.00 | 57.10 | C0   |    |
| ANISOU 6782 CA VAL C 27   | 8010    | 6530   | 7150   | -130 | 160   | 1700 | C0 |
| ATOM 6783 C VAL C 27      | -47.412 | 28.937 | 13.811 | 1.00 | 55.70 | C0   |    |
| ANISOU 6783 C VAL C 27    | 7790    | 6250   | 7120   | 10   | 200   | 1560 | C0 |
| ATOM 6784 O VAL C 27      | -46.505 | 28.771 | 14.651 | 1.00 | 54.28 | O0   |    |
| ANISOU 6784 O VAL C 27    | 7600    | 6070   | 6960   | -90  | 280   | 1440 | O0 |
| ATOM 6785 CB VAL C 27     | -46.449 | 27.442 | 11.990 | 1.00 | 55.46 | C0   |    |
| ANISOU 6785 CB VAL C 27   | 7640    | 6590   | 6840   | -260 | 230   | 1620 | C0 |
| ATOM 6786 CG1 VAL C 27    | -47.313 | 26.299 | 12.499 | 1.00 | 54.18 | C0   |    |
| ANISOU 6786 CG1 VAL C 27  | 7300    | 6570   | 6720   | -110 | 230   | 1520 | C0 |
| ATOM 6787 CG2 VAL C 27    | -46.191 | 27.290 | 10.500 | 1.00 | 56.85 | C0   |    |
| ANISOU 6787 CG2 VAL C 27  | 7840    | 6890   | 6860   | -390 | 200   | 1760 | C0 |
| ATOM 6788 H VAL C 27      | -45.275 | 29.669 | 11.861 | 1.00 | 58.95 | H0   |    |
| ANISOU 6788 H VAL C 27    | 8430    | 6680   | 7290   | -450 | 220   | 1770 | H0 |
| ATOM 6789 HA VAL C 27     | -47.876 | 28.929 | 11.803 | 1.00 | 57.82 | H0   |    |
| ANISOU 6789 HA VAL C 27   | 8100    | 6620   | 7240   | -30  | 90    | 1790 | H0 |
| ATOM 6790 HB VAL C 27     | -45.577 | 27.388 | 12.453 | 1.00 | 55.06 | H0   |    |
| ANISOU 6790 HB VAL C 27   | 7590    | 6540   | 6790   | -360 | 300   | 1550 | H0 |
| ATOM 6791 HG11 VAL C 27   | -47.164 | 26.177 | 13.453 | 1.00 | 53.28 | H0   |    |
| ANISOU 6791 HG11 VAL C 27 | 7150    | 6430   | 6670   | -80  | 280   | 1410 | H0 |
| ATOM 6792 HG12 VAL C 27   | -47.079 | 25.479 | 12.029 | 1.00 | 53.33 | H0   |    |
| ANISOU 6792 HG12 VAL C 27 | 7110    | 6620   | 6530   | -180 | 250   | 1500 | H0 |
| ATOM 6793 HG13 VAL C 27   | -48.251 | 26.505 | 12.341 | 1.00 | 54.70 | H0   |    |
| ANISOU 6793 HG13 VAL C 27 | 7360    | 6610   | 6820   | 10   | 170   | 1570 | H0 |
| ATOM 6794 HG21 VAL C 27   | -47.026 | 27.399 | 10.012 | 1.00 | 57.36 | H0   |    |
| ANISOU 6794 HG21 VAL C 27 | 7910    | 6950   | 6930   | -290 | 120   | 1840 | H0 |
| ATOM 6795 HG22 VAL C 27   | -45.825 | 26.406 | 10.321 | 1.00 | 55.62 | H0   |    |
| ANISOU 6795 HG22 VAL C 27 | 7590    | 6900   | 6640   | -450 | 240   | 1690 | H0 |
| ATOM 6796 HG23 VAL C 27   | -45.556 | 27.967 | 10.210 | 1.00 | 57.74 | H0   |    |
| ANISOU 6796 HG23 VAL C 27 | 8070    | 6930   | 6940   | -510 | 200   | 1820 | H0 |
| ATOM 6797 N ALA C 28      | -48.673 | 29.253 | 14.109 | 1.00 | 55.97 | N0   |    |
| ANISOU 6797 N ALA C 28    | 7810    | 6210   | 7240   | 240  | 130   | 1570 | N0 |
| ATOM 6798 CA ALA C 28     | -49.211 | 29.385 | 15.481 | 1.00 | 55.76 | C0   |    |
| ANISOU 6798 CA ALA C 28   | 7730    | 6110   | 7340   | 400  | 160   | 1430 | C0 |
| ATOM 6799 C ALA C 28      | -49.446 | 27.986 | 16.063 | 1.00 | 53.33 | C0   |    |
| ANISOU 6799 C ALA C 28    | 7210    | 6030   | 7020   | 420  | 220   | 1300 | C0 |
| ATOM 6800 O ALA C 28      | -50.395 | 27.308 | 15.626 | 1.00 | 52.77 | O0   |    |
| ANISOU 6800 O ALA C 28    | 7010    | 6110   | 6930   | 510  | 180   | 1330 | O0 |
| ATOM 6801 CB ALA C 28     | -50.476 | 30.207 | 15.458 | 1.00 | 57.63 | C0   |    |
| ANISOU 6801 CB ALA C 28   | 8020    | 6220   | 7670   | 640  | 70    | 1490 | C0 |

|                           |         |        |        |      |       |      |    |
|---------------------------|---------|--------|--------|------|-------|------|----|
| ATOM 6802 H ALA C 28      | -49.307 | 29.410 | 13.474 | 1.00 | 56.97 | H0   |    |
| ANISOU 6802 H ALA C 28    | 7950    | 6340   | 7360   | 310  | 60    | 1660 | H0 |
| ATOM 6803 HA ALA C 28     | -48.542 | 29.846 | 16.035 | 1.00 | 55.80 | H0   |    |
| ANISOU 6803 HA ALA C 28   | 7820    | 6000   | 7380   | 330  | 200   | 1380 | H0 |
| ATOM 6804 HB1 ALA C 28    | -50.798 | 30.334 | 16.367 | 1.00 | 57.50 | H0   |    |
| ANISOU 6804 HB1 ALA C 28  | 7970    | 6150   | 7730   | 750  | 90    | 1400 | H0 |
| ATOM 6805 HB2 ALA C 28    | -50.294 | 31.073 | 15.058 | 1.00 | 59.07 | H0   |    |
| ANISOU 6805 HB2 ALA C 28  | 8350    | 6240   | 7850   | 630  | 20    | 1590 | H0 |
| ATOM 6806 HB3 ALA C 28    | -51.155 | 29.747 | 14.937 | 1.00 | 57.55 | H0   |    |
| ANISOU 6806 HB3 ALA C 28  | 7910    | 6330   | 7630   | 710  | 20    | 1540 | H0 |
| ATOM 6807 N VAL C 29      | -48.595 | 27.566 | 16.999 | 1.00 | 51.62 | N0   |    |
| ANISOU 6807 N VAL C 29    | 6960    | 5840   | 6820   | 320  | 310   | 1160 | N0 |
| ATOM 6808 CA VAL C 29     | -48.690 | 26.239 | 17.671 | 1.00 | 49.91 | C0   |    |
| ANISOU 6808 CA VAL C 29   | 6570    | 5810   | 6590   | 320  | 370   | 1030 | C0 |
| ATOM 6809 C VAL C 29      | -49.339 | 26.444 | 19.044 | 1.00 | 50.09 | C0   |    |
| ANISOU 6809 C VAL C 29    | 6550    | 5770   | 6710   | 470  | 400   | 910  | C0 |
| ATOM 6810 O VAL C 29      | -48.810 | 27.240 | 19.836 | 1.00 | 49.86 | O0   |    |
| ANISOU 6810 O VAL C 29    | 6620    | 5580   | 6740   | 450  | 430   | 860  | O0 |
| ATOM 6811 CB VAL C 29     | -47.311 | 25.565 | 17.788 | 1.00 | 48.52 | C0   |    |
| ANISOU 6811 CB VAL C 29   | 6380    | 5720   | 6340   | 130  | 440   | 960  | C0 |
| ATOM 6812 CG1 VAL C 29    | -47.400 | 24.204 | 18.466 | 1.00 | 46.70 | C0   |    |
| ANISOU 6812 CG1 VAL C 29  | 5990    | 5660   | 6100   | 130  | 480   | 830  | C0 |
| ATOM 6813 CG2 VAL C 29    | -46.633 | 25.447 | 16.431 | 1.00 | 48.67 | C0   |    |
| ANISOU 6813 CG2 VAL C 29  | 6430    | 5810   | 6250   | -20  | 420   | 1070 | C0 |
| ATOM 6814 H VAL C 29      | -47.894 | 28.071 | 17.289 | 1.00 | 52.04 | H0   |    |
| ANISOU 6814 H VAL C 29    | 7100    | 5790   | 6880   | 250  | 340   | 1140 | H0 |
| ATOM 6815 HA VAL C 29     | -49.267 | 25.666 | 17.138 | 1.00 | 49.68 | H0   |    |
| ANISOU 6815 HA VAL C 29   | 6460    | 5900   | 6520   | 360  | 340   | 1070 | H0 |
| ATOM 6816 HB VAL C 29     | -46.747 | 26.146 | 18.355 | 1.00 | 48.77 | H0   |    |
| ANISOU 6816 HB VAL C 29   | 6480    | 5640   | 6410   | 90   | 470   | 920  | H0 |
| ATOM 6817 HG11 VAL C 29   | -47.709 | 24.315 | 19.381 | 1.00 | 46.57 | H0   |    |
| ANISOU 6817 HG11 VAL C 29 | 5960    | 5600   | 6140   | 200  | 500   | 760  | H0 |
| ATOM 6818 HG12 VAL C 29   | -46.522 | 23.785 | 18.470 | 1.00 | 46.02 | H0   |    |
| ANISOU 6818 HG12 VAL C 29 | 5900    | 5620   | 5960   | 30   | 520   | 790  | H0 |
| ATOM 6819 HG13 VAL C 29   | -48.025 | 23.640 | 17.979 | 1.00 | 46.52 | H0   |    |
| ANISOU 6819 HG13 VAL C 29 | 5900    | 5730   | 6040   | 170  | 450   | 870  | H0 |
| ATOM 6820 HG21 VAL C 29   | -47.240 | 25.022 | 15.801 | 1.00 | 48.72 | H0   |    |
| ANISOU 6820 HG21 VAL C 29 | 6390    | 5910   | 6220   | 30   | 380   | 1120 | H0 |
| ATOM 6821 HG22 VAL C 29   | -45.827 | 24.909 | 16.516 | 1.00 | 47.89 | H0   |    |
| ANISOU 6821 HG22 VAL C 29 | 6300    | 5790   | 6110   | -120 | 470   | 1010 | H0 |
| ATOM 6822 HG23 VAL C 29   | -46.398 | 26.333 | 16.107 | 1.00 | 49.91 | H0   |    |
| ANISOU 6822 HG23 VAL C 29 | 6700    | 5850   | 6410   | -50  | 410   | 1140 | H0 |
| ATOM 6823 N SER C 30      | -50.464 | 25.772 | 19.288 | 1.00 | 50.34 | N0   |    |
| ANISOU 6823 N SER C 30    | 6440    | 5930   | 6750   | 590  | 380   | 880  | N0 |
| ATOM 6824 CA SER C 30     | -51.099 | 25.653 | 20.624 | 1.00 | 50.86 | C0   |    |
| ANISOU 6824 CA SER C 30   | 6420    | 6020   | 6890   | 710  | 420   | 750  | C0 |
| ATOM 6825 C SER C 30      | -50.431 | 24.500 | 21.376 | 1.00 | 49.04 | C0   |    |
| ANISOU 6825 C SER C 30    | 6110    | 5910   | 6620   | 580  | 490   | 630  | C0 |
| ATOM 6826 O SER C 30      | -50.491 | 23.368 | 20.871 | 1.00 | 47.12 | O0   |    |
| ANISOU 6826 O SER C 30    | 5770    | 5830   | 6300   | 510  | 480   | 650  | O0 |
| ATOM 6827 CB SER C 30     | -52.584 | 25.455 | 20.508 | 1.00 | 51.86 | C0   |    |
| ANISOU 6827 CB SER C 30   | 6420    | 6260   | 7030   | 880  | 380   | 770  | C0 |
| ATOM 6828 OG SER C 30     | -53.224 | 26.672 | 20.158 | 1.00 | 54.67 | O0   |    |
| ANISOU 6828 OG SER C 30   | 6850    | 6470   | 7450   | 1040 | 310   | 840  | O0 |

|                           |         |        |        |      |       |     |    |
|---------------------------|---------|--------|--------|------|-------|-----|----|
| ATOM 6829 H SER C 30      | -50.930 | 25.330 | 18.642 | 1.00 | 50.33 | H0  |    |
| ANISOU 6829 H SER C 30    | 6370    | 6040   | 6710   | 610  | 340   | 930 | H0 |
| ATOM 6830 HA SER C 30     | -50.932 | 26.495 | 21.123 | 1.00 | 51.58 | H0  |    |
| ANISOU 6830 HA SER C 30   | 6600    | 5960   | 7040   | 750  | 440   | 720 | H0 |
| ATOM 6831 HB2 SER C 30    | -52.770 | 24.781 | 19.823 | 1.00 | 51.51 | H0  |    |
| ANISOU 6831 HB2 SER C 30  | 6310    | 6330   | 6930   | 830  | 350   | 820 | H0 |
| ATOM 6832 HB3 SER C 30    | -52.941 | 25.130 | 21.365 | 1.00 | 51.60 | H0  |    |
| ANISOU 6832 HB3 SER C 30  | 6300    | 6280   | 7020   | 920  | 410   | 680 | H0 |
| ATOM 6833 N VAL C 31      | -49.774 | 24.799 | 22.499 | 1.00 | 49.72 | N0  |    |
| ANISOU 6833 N VAL C 31    | 6250    | 5900   | 6740   | 550  | 550   | 520 | N0 |
| ATOM 6834 CA VAL C 31     | -49.088 | 23.804 | 23.376 | 1.00 | 49.61 | C0  |    |
| ANISOU 6834 CA VAL C 31   | 6170    | 5990   | 6690   | 440  | 610   | 410 | C0 |
| ATOM 6835 C VAL C 31      | -49.722 | 23.888 | 24.763 | 1.00 | 50.18 | C0  |    |
| ANISOU 6835 C VAL C 31    | 6200    | 6050   | 6820   | 540  | 650   | 290 | C0 |
| ATOM 6836 O VAL C 31      | -49.851 | 25.009 | 25.277 | 1.00 | 52.41 | O0  |    |
| ANISOU 6836 O VAL C 31    | 6560    | 6190   | 7170   | 620  | 670   | 260 | O0 |
| ATOM 6837 CB VAL C 31     | -47.570 | 24.056 | 23.457 | 1.00 | 49.74 | C0  |    |
| ANISOU 6837 CB VAL C 31   | 6290    | 5920   | 6690   | 290  | 650   | 380 | C0 |
| ATOM 6838 CG1 VAL C 31    | -46.891 | 23.083 | 24.406 | 1.00 | 48.92 | C0  |    |
| ANISOU 6838 CG1 VAL C 31  | 6120    | 5910   | 6550   | 200  | 690   | 260 | C0 |
| ATOM 6839 CG2 VAL C 31    | -46.915 | 24.007 | 22.088 | 1.00 | 50.21 | C0  |    |
| ANISOU 6839 CG2 VAL C 31  | 6390    | 6010   | 6690   | 180  | 620   | 490 | C0 |
| ATOM 6840 H VAL C 31      | -49.702 | 25.654 | 22.807 | 1.00 | 50.69 | H0  |    |
| ANISOU 6840 H VAL C 31    | 6450    | 5900   | 6920   | 590  | 560   | 510 | H0 |
| ATOM 6841 HA VAL C 31     | -49.238 | 22.913 | 23.016 | 1.00 | 48.73 | H0  |    |
| ANISOU 6841 HA VAL C 31   | 5990    | 6000   | 6530   | 410  | 600   | 420 | H0 |
| ATOM 6842 HB VAL C 31     | -47.442 | 24.967 | 23.819 | 1.00 | 50.68 | H0  |    |
| ANISOU 6842 HB VAL C 31   | 6490    | 5910   | 6860   | 310  | 660   | 370 | H0 |
| ATOM 6843 HG11 VAL C 31   | -47.059 | 23.353 | 25.326 | 1.00 | 48.87 | H0  |    |
| ANISOU 6843 HG11 VAL C 31 | 6120    | 5860   | 6590   | 240  | 720   | 190 | H0 |
| ATOM 6844 HG12 VAL C 31   | -45.932 | 23.081 | 24.241 | 1.00 | 48.48 | H0  |    |
| ANISOU 6844 HG12 VAL C 31 | 6100    | 5840   | 6470   | 100  | 700   | 260 | H0 |
| ATOM 6845 HG13 VAL C 31   | -47.246 | 22.188 | 24.262 | 1.00 | 48.03 | H0  |    |
| ANISOU 6845 HG13 VAL C 31 | 5930    | 5910   | 6400   | 210  | 680   | 260 | H0 |
| ATOM 6846 HG21 VAL C 31   | -47.152 | 23.175 | 21.643 | 1.00 | 49.42 | H0  |    |
| ANISOU 6846 HG21 VAL C 31 | 6210    | 6030   | 6540   | 170  | 600   | 510 | H0 |
| ATOM 6847 HG22 VAL C 31   | -45.949 | 24.059 | 22.186 | 1.00 | 49.80 | H0  |    |
| ANISOU 6847 HG22 VAL C 31 | 6370    | 5940   | 6610   | 80   | 640   | 470 | H0 |
| ATOM 6848 HG23 VAL C 31   | -47.225 | 24.759 | 21.554 | 1.00 | 51.14 | H0  |    |
| ANISOU 6848 HG23 VAL C 31 | 6570    | 6040   | 6820   | 220  | 590   | 570 | H0 |
| ATOM 6849 N SER C 32      | -50.111 | 22.750 | 25.336 | 1.00 | 49.31 | N0  |    |
| ANISOU 6849 N SER C 32    | 5970    | 6100   | 6660   | 520  | 670   | 230 | N0 |
| ATOM 6850 CA SER C 32     | -50.528 | 22.642 | 26.757 | 1.00 | 49.69 | C0  |    |
| ANISOU 6850 CA SER C 32   | 5970    | 6180   | 6730   | 560  | 720   | 110 | C0 |
| ATOM 6851 C SER C 32      | -50.369 | 21.195 | 27.221 | 1.00 | 48.25 | C0  |    |
| ANISOU 6851 C SER C 32    | 5700    | 6160   | 6470   | 460  | 730   | 60  | C0 |
| ATOM 6852 O SER C 32      | -50.640 | 20.280 | 26.418 | 1.00 | 47.92 | O0  |    |
| ANISOU 6852 O SER C 32    | 5600    | 6230   | 6380   | 410  | 690   | 120 | O0 |
| ATOM 6853 CB SER C 32     | -51.929 | 23.158 | 26.978 | 1.00 | 51.41 | C0  |    |
| ANISOU 6853 CB SER C 32   | 6110    | 6430   | 7000   | 740  | 720   | 100 | C0 |
| ATOM 6854 OG SER C 32     | -52.898 | 22.269 | 26.444 | 1.00 | 51.77 | O0  |    |
| ANISOU 6854 OG SER C 32   | 6020    | 6660   | 6990   | 750  | 680   | 150 | O0 |
| ATOM 6855 H SER C 32      | -50.157 | 21.954 | 24.895 | 1.00 | 48.71 | H0  |    |
| ANISOU 6855 H SER C 32    | 5840    | 6130   | 6540   | 470  | 650   | 260 | H0 |

|                           |         |        |        |      |       |      |    |
|---------------------------|---------|--------|--------|------|-------|------|----|
| ATOM 6856 HA SER C 32     | -49.906 | 23.202 | 27.292 | 1.00 | 49.85 |      | H0 |
| ANISOU 6856 HA SER C 32   | 6060    | 6100   | 6780   | 540  | 750   | 60   | H0 |
| ATOM 6857 HB2 SER C 32    | -52.086 | 23.270 | 27.943 | 1.00 | 51.61 |      | H0 |
| ANISOU 6857 HB2 SER C 32  | 6120    | 6460   | 7040   | 760  | 760   | 10   | H0 |
| ATOM 6858 HB3 SER C 32    | -52.024 | 24.038 | 26.549 | 1.00 | 52.49 |      | H0 |
| ANISOU 6858 HB3 SER C 32  | 6310    | 6460   | 7180   | 810  | 700   | 140  | H0 |
| ATOM 6859 N LEU C 33      | -49.909 | 21.010 | 28.460 | 1.00 | 47.27 |      | N0 |
| ANISOU 6859 N LEU C 33    | 5590    | 6020   | 6340   | 410  | 780   | -50  | N0 |
| ATOM 6860 CA LEU C 33     | -49.723 | 19.675 | 29.080 | 1.00 | 45.76 |      | C0 |
| ANISOU 6860 CA LEU C 33   | 5350    | 5960   | 6080   | 310  | 780   | -100 | C0 |
| ATOM 6861 C LEU C 33      | -50.953 | 19.348 | 29.934 | 1.00 | 45.78 |      | C0 |
| ANISOU 6861 C LEU C 33    | 5250    | 6080   | 6060   | 360  | 810   | -150 | C0 |
| ATOM 6862 O LEU C 33      | -51.413 | 20.231 | 30.687 | 1.00 | 46.47 |      | O0 |
| ANISOU 6862 O LEU C 33    | 5340    | 6120   | 6200   | 450  | 850   | -210 | O0 |
| ATOM 6863 CB LEU C 33     | -48.433 | 19.679 | 29.907 | 1.00 | 45.56 |      | C0 |
| ANISOU 6863 CB LEU C 33   | 5400    | 5860   | 6050   | 220  | 810   | -180 | C0 |
| ATOM 6864 CG LEU C 33     | -47.185 | 20.183 | 29.183 | 1.00 | 45.86 |      | C0 |
| ANISOU 6864 CG LEU C 33   | 5530    | 5790   | 6100   | 160  | 800   | -150 | C0 |
| ATOM 6865 CD1 LEU C 33    | -45.937 | 19.896 | 30.006 | 1.00 | 45.74 |      | C0 |
| ANISOU 6865 CD1 LEU C 33  | 5550    | 5760   | 6060   | 60   | 810   | -230 | C0 |
| ATOM 6866 CD2 LEU C 33    | -47.056 | 19.573 | 27.795 | 1.00 | 45.24 |      | C0 |
| ANISOU 6866 CD2 LEU C 33  | 5430    | 5780   | 5980   | 120  | 750   | -50  | C0 |
| ATOM 6867 H LEU C 33      | -49.683 | 21.702 | 29.008 | 1.00 | 47.78 |      | H0 |
| ANISOU 6867 H LEU C 33    | 5710    | 6000   | 6450   | 430  | 810   | -100 | H0 |
| ATOM 6868 HA LEU C 33     | -49.649 | 19.008 | 28.364 | 1.00 | 45.29 |      | H0 |
| ANISOU 6868 HA LEU C 33   | 5270    | 5950   | 5980   | 260  | 740   | -50  | H0 |
| ATOM 6869 HB2 LEU C 33    | -48.578 | 20.236 | 30.697 | 1.00 | 46.07 |      | H0 |
| ANISOU 6869 HB2 LEU C 33  | 5480    | 5880   | 6140   | 250  | 840   | -240 | H0 |
| ATOM 6870 HB3 LEU C 33    | -48.265 | 18.767 | 30.216 | 1.00 | 44.85 |      | H0 |
| ANISOU 6870 HB3 LEU C 33  | 5290    | 5840   | 5910   | 150  | 800   | -210 | H0 |
| ATOM 6871 HG LEU C 33     | -47.265 | 21.162 | 29.079 | 1.00 | 46.64 |      | H0 |
| ANISOU 6871 HG LEU C 33   | 5670    | 5800   | 6250   | 200  | 810   | -140 | H0 |
| ATOM 6872 HD11 LEU C 33   | -46.085 | 20.175 | 30.927 | 1.00 | 45.83 |      | H0 |
| ANISOU 6872 HD11 LEU C 33 | 5570    | 5750   | 6090   | 70   | 840   | -300 | H0 |
| ATOM 6873 HD12 LEU C 33   | -45.184 | 20.388 | 29.637 | 1.00 | 45.70 |      | H0 |
| ANISOU 6873 HD12 LEU C 33 | 5600    | 5690   | 6070   | 20   | 810   | -220 | H0 |
| ATOM 6874 HD13 LEU C 33   | -45.745 | 18.943 | 29.984 | 1.00 | 44.84 |      | H0 |
| ANISOU 6874 HD13 LEU C 33 | 5410    | 5730   | 5900   | 10   | 790   | -240 | H0 |
| ATOM 6875 HD21 LEU C 33   | -47.281 | 18.628 | 27.833 | 1.00 | 44.67 |      | H0 |
| ANISOU 6875 HD21 LEU C 33 | 5310    | 5800   | 5870   | 100  | 730   | -60  | H0 |
| ATOM 6876 HD22 LEU C 33   | -46.143 | 19.675 | 27.477 | 1.00 | 45.08 |      | H0 |
| ANISOU 6876 HD22 LEU C 33 | 5450    | 5730   | 5960   | 60   | 750   | -50  | H0 |
| ATOM 6877 HD23 LEU C 33   | -47.663 | 20.025 | 27.183 | 1.00 | 45.89 |      | H0 |
| ANISOU 6877 HD23 LEU C 33 | 5500    | 5850   | 6090   | 180  | 740   | 10   | H0 |
| ATOM 6878 N LYS C 34      | -51.495 | 18.140 | 29.773 | 1.00 | 44.57 |      | N0 |
| ANISOU 6878 N LYS C 34    | 5020    | 6070   | 5840   | 300  | 770   | -120 | N0 |
| ATOM 6879 CA LYS C 34     | -52.494 | 17.552 | 30.699 | 1.00 | 45.25 |      | C0 |
| ANISOU 6879 CA LYS C 34   | 5010    | 6300   | 5870   | 290  | 800   | -170 | C0 |
| ATOM 6880 C LYS C 34      | -51.782 | 16.431 | 31.459 | 1.00 | 42.48 |      | C0 |
| ANISOU 6880 C LYS C 34    | 4710    | 5980   | 5450   | 140  | 790   | -220 | C0 |
| ATOM 6881 O LYS C 34      | -51.352 | 15.465 | 30.805 | 1.00 | 41.04 |      | O0 |
| ANISOU 6881 O LYS C 34    | 4560    | 5810   | 5220   | 60   | 730   | -170 | O0 |
| ATOM 6882 CB LYS C 34     | -53.741 | 17.068 | 29.946 | 1.00 | 47.54 |      | C0 |
| ANISOU 6882 CB LYS C 34   | 5190    | 6740   | 6130   | 310  | 760   | -100 | C0 |

|                          |         |        |        |      |       |      |    |
|--------------------------|---------|--------|--------|------|-------|------|----|
| ATOM 6883 CG LYS C 34    | -54.921 | 18.033 | 29.962 | 1.00 | 51.01 | C0   |    |
| ANISOU 6883 CG LYS C 34  | 5530    | 7230   | 6620   | 470  | 790   | -110 | C0 |
| ATOM 6884 CD LYS C 34    | -55.597 | 18.142 | 31.318 | 1.00 | 53.11 | C0   |    |
| ANISOU 6884 CD LYS C 34  | 5710    | 7600   | 6870   | 490  | 860   | -210 | C0 |
| ATOM 6885 CE LYS C 34    | -56.322 | 19.454 | 31.537 | 1.00 | 56.32 | C0   |    |
| ANISOU 6885 CE LYS C 34  | 6070    | 7980   | 7350   | 690  | 900   | -260 | C0 |
| ATOM 6886 NZ LYS C 34    | -57.777 | 19.330 | 31.281 | 1.00 | 58.80 | N0   |    |
| ANISOU 6886 NZ LYS C 34  | 6200    | 8500   | 7640   | 770  | 890   | -240 | N0 |
| ATOM 6887 H LYS C 34     | -51.278 | 17.595 | 29.076 | 1.00 | 44.31 | H0   |    |
| ANISOU 6887 H LYS C 34   | 5000    | 6060   | 5780   | 250  | 730   | -80  | H0 |
| ATOM 6888 HA LYS C 34    | -52.764 | 18.244 | 31.343 | 1.00 | 45.88 | H0   |    |
| ANISOU 6888 HA LYS C 34  | 5080    | 6360   | 5990   | 350  | 840   | -230 | H0 |
| ATOM 6889 HB2 LYS C 34   | -53.493 | 16.896 | 29.014 | 1.00 | 47.20 | H0   |    |
| ANISOU 6889 HB2 LYS C 34 | 5170    | 6680   | 6090   | 300  | 720   | -40  | H0 |
| ATOM 6890 HB3 LYS C 34   | -54.030 | 16.218 | 30.338 | 1.00 | 47.30 | H0   |    |
| ANISOU 6890 HB3 LYS C 34 | 5120    | 6810   | 6040   | 230  | 750   | -120 | H0 |
| ATOM 6891 HG2 LYS C 34   | -54.604 | 18.921 | 29.690 | 1.00 | 51.21 | H0   |    |
| ANISOU 6891 HG2 LYS C 34 | 5610    | 7140   | 6710   | 550  | 790   | -100 | H0 |
| ATOM 6892 HG3 LYS C 34   | -55.580 | 17.735 | 29.300 | 1.00 | 51.18 | H0   |    |
| ANISOU 6892 HG3 LYS C 34 | 5480    | 7340   | 6620   | 480  | 750   | -50  | H0 |
| ATOM 6893 HD2 LYS C 34   | -56.242 | 17.408 | 31.409 | 1.00 | 53.26 | H0   |    |
| ANISOU 6893 HD2 LYS C 34 | 5650    | 7760   | 6830   | 430  | 850   | -200 | H0 |
| ATOM 6894 HD3 LYS C 34   | -54.922 | 18.035 | 32.021 | 1.00 | 52.59 | H0   |    |
| ANISOU 6894 HD3 LYS C 34 | 5720    | 7470   | 6790   | 430  | 880   | -260 | H0 |
| ATOM 6895 HE2 LYS C 34   | -56.187 | 19.749 | 32.458 | 1.00 | 56.48 | H0   |    |
| ANISOU 6895 HE2 LYS C 34 | 6110    | 7980   | 7380   | 700  | 950   | -340 | H0 |
| ATOM 6896 HE3 LYS C 34   | -55.953 | 20.136 | 30.945 | 1.00 | 56.34 | H0   |    |
| ANISOU 6896 HE3 LYS C 34 | 6140    | 7850   | 7420   | 760  | 880   | -220 | H0 |
| ATOM 6897 HZ1 LYS C 34   | -57.915 | 18.954 | 30.467 | 1.00 | 58.17 | H0   |    |
| ANISOU 6897 HZ1 LYS C 34 | 6100    | 8450   | 7550   | 740  | 840   | -160 | H0 |
| ATOM 6898 HZ2 LYS C 34   | -58.163 | 20.151 | 31.298 | 1.00 | 59.53 | H0   |    |
| ANISOU 6898 HZ2 LYS C 34 | 6270    | 8560   | 7790   | 900  | 910   | -260 | H0 |
| ATOM 6899 HZ3 LYS C 34   | -58.158 | 18.809 | 31.918 | 1.00 | 58.54 | H0   |    |
| ANISOU 6899 HZ3 LYS C 34 | 6100    | 8590   | 7550   | 700  | 920   | -280 | H0 |
| ATOM 6900 N PHE C 35     | -51.620 | 16.590 | 32.775 | 1.00 | 40.43 | N0   |    |
| ANISOU 6900 N PHE C 35   | 4470    | 5710   | 5180   | 120  | 840   | -310 | N0 |
| ATOM 6901 CA PHE C 35    | -50.881 | 15.639 | 33.644 | 1.00 | 38.44 | C0   |    |
| ANISOU 6901 CA PHE C 35  | 4280    | 5470   | 4860   | 0    | 820   | -350 | C0 |
| ATOM 6902 C PHE C 35     | -51.794 | 14.457 | 33.974 | 1.00 | 37.15 | C0   |    |
| ANISOU 6902 C PHE C 35   | 4050    | 5470   | 4600   | -90  | 800   | -340 | C0 |
| ATOM 6903 O PHE C 35     | -52.952 | 14.674 | 34.378 | 1.00 | 38.29 | O0   |    |
| ANISOU 6903 O PHE C 35   | 4100    | 5730   | 4720   | -60  | 840   | -350 | O0 |
| ATOM 6904 CB PHE C 35    | -50.338 | 16.346 | 34.888 | 1.00 | 38.71 | C0   |    |
| ANISOU 6904 CB PHE C 35  | 4360    | 5440   | 4910   | 0    | 880   | -450 | C0 |
| ATOM 6905 CG PHE C 35    | -49.251 | 17.345 | 34.586 | 1.00 | 38.46 | C0   |    |
| ANISOU 6905 CG PHE C 35  | 4410    | 5250   | 4950   | 40   | 890   | -470 | C0 |
| ATOM 6906 CD1 PHE C 35   | -47.931 | 16.941 | 34.477 | 1.00 | 37.58 | C0   |    |
| ANISOU 6906 CD1 PHE C 35 | 4370    | 5070   | 4830   | -30  | 850   | -470 | C0 |
| ATOM 6907 CD2 PHE C 35   | -49.550 | 18.687 | 34.403 | 1.00 | 39.62 | C0   |    |
| ANISOU 6907 CD2 PHE C 35 | 4560    | 5310   | 5180   | 160  | 930   | -480 | C0 |
| ATOM 6908 CE1 PHE C 35   | -46.932 | 17.859 | 34.186 | 1.00 | 37.50 | C0   |    |
| ANISOU 6908 CE1 PHE C 35 | 4430    | 4940   | 4880   | -20  | 860   | -480 | C0 |
| ATOM 6909 CE2 PHE C 35   | -48.549 | 19.602 | 34.114 | 1.00 | 39.73 | C0   |    |
| ANISOU 6909 CE2 PHE C 35 | 4670    | 5170   | 5260   | 170  | 940   | -490 | C0 |

|                           |         |        |        |      |       |      |    |
|---------------------------|---------|--------|--------|------|-------|------|----|
| ATOM 6910 CZ PHE C 35     | -47.241 | 19.186 | 34.003 | 1.00 | 38.42 | C0   |    |
| ANISOU 6910 CZ PHE C 35   | 4560    | 4960   | 5070   | 70   | 900   | -490 | C0 |
| ATOM 6911 H PHE C 35      | -51.957 | 17.298 | 33.238 | 1.00 | 41.35 | H0   |    |
| ANISOU 6911 H PHE C 35    | 4570    | 5820   | 5330   | 190  | 880   | -350 | H0 |
| ATOM 6912 HA PHE C 35     | -50.108 | 15.293 | 33.129 | 1.00 | 37.69 | H0   |    |
| ANISOU 6912 HA PHE C 35   | 4240    | 5330   | 4760   | -40  | 780   | -330 | H0 |
| ATOM 6913 HB2 PHE C 35    | -51.078 | 16.805 | 35.336 | 1.00 | 39.49 | H0   |    |
| ANISOU 6913 HB2 PHE C 35  | 4410    | 5580   | 5010   | 50   | 930   | -490 | H0 |
| ATOM 6914 HB3 PHE C 35    | -49.987 | 15.669 | 35.503 | 1.00 | 38.31 | H0   |    |
| ANISOU 6914 HB3 PHE C 35  | 4340    | 5410   | 4800   | -80  | 860   | -480 | H0 |
| ATOM 6915 HD1 PHE C 35    | -47.711 | 16.031 | 34.594 | 1.00 | 37.03 | H0   |    |
| ANISOU 6915 HD1 PHE C 35  | 4310    | 5050   | 4710   | -100 | 810   | -470 | H0 |
| ATOM 6916 HD2 PHE C 35    | -50.445 | 18.978 | 34.471 | 1.00 | 40.30 | H0   |    |
| ANISOU 6916 HD2 PHE C 35  | 4590    | 5440   | 5280   | 230  | 960   | -490 | H0 |
| ATOM 6917 HE1 PHE C 35    | -46.036 | 17.570 | 34.115 | 1.00 | 37.05 | H0   |    |
| ANISOU 6917 HE1 PHE C 35  | 4410    | 4860   | 4810   | -70  | 840   | -490 | H0 |
| ATOM 6918 HE2 PHE C 35    | -48.765 | 20.512 | 33.991 | 1.00 | 40.38 | H0   |    |
| ANISOU 6918 HE2 PHE C 35  | 4770    | 5180   | 5390   | 240  | 960   | -500 | H0 |
| ATOM 6919 HZ PHE C 35     | -46.559 | 19.811 | 33.813 | 1.00 | 38.67 | H0   |    |
| ANISOU 6919 HZ PHE C 35   | 4650    | 4910   | 5140   | 60   | 910   | -490 | H0 |
| ATOM 6920 N ILE C 36      | -51.276 | 13.246 | 33.759 | 1.00 | 35.52 | N0   |    |
| ANISOU 6920 N ILE C 36    | 3910    | 5260   | 4330   | -200 | 730   | -300 | N0 |
| ATOM 6921 CA ILE C 36     | -51.990 | 11.945 | 33.916 | 1.00 | 35.07 | C0   |    |
| ANISOU 6921 CA ILE C 36   | 3830    | 5320   | 4170   | -320 | 680   | -270 | C0 |
| ATOM 6922 C ILE C 36      | -51.465 | 11.239 | 35.171 | 1.00 | 34.74 | C0   |    |
| ANISOU 6922 C ILE C 36    | 3880    | 5270   | 4050   | -420 | 670   | -320 | C0 |
| ATOM 6923 O ILE C 36      | -52.270 | 10.613 | 35.867 | 1.00 | 35.43 | O0   |    |
| ANISOU 6923 O ILE C 36    | 3940    | 5470   | 4050   | -520 | 670   | -320 | O0 |
| ATOM 6924 CB ILE C 36     | -51.809 | 11.057 | 32.666 | 1.00 | 34.06 | C0   |    |
| ANISOU 6924 CB ILE C 36   | 3740    | 5180   | 4020   | -350 | 590   | -200 | C0 |
| ATOM 6925 CG1 ILE C 36    | -52.169 | 11.789 | 31.367 | 1.00 | 34.12 | C0   |    |
| ANISOU 6925 CG1 ILE C 36  | 3680    | 5190   | 4100   | -250 | 600   | -140 | C0 |
| ATOM 6926 CG2 ILE C 36    | -52.594 | 9.763  | 32.819 | 1.00 | 34.54 | C0   |    |
| ANISOU 6926 CG2 ILE C 36  | 3800    | 5350   | 3970   | -480 | 540   | -160 | C0 |
| ATOM 6927 CD1 ILE C 36    | -53.616 | 12.210 | 31.267 | 1.00 | 35.06 | C0   |    |
| ANISOU 6927 CD1 ILE C 36  | 3660    | 5440   | 4220   | -200 | 630   | -120 | C0 |
| ATOM 6928 H ILE C 36      | -50.418 | 13.139 | 33.474 | 1.00 | 35.00 | H0   |    |
| ANISOU 6928 H ILE C 36    | 3900    | 5120   | 4280   | -210 | 700   | -300 | H0 |
| ATOM 6929 HA ILE C 36     | -52.939 | 12.123 | 34.036 | 1.00 | 35.77 | H0   |    |
| ANISOU 6929 HA ILE C 36   | 3840    | 5510   | 4240   | -300 | 710   | -260 | H0 |
| ATOM 6930 HB ILE C 36     | -50.852 | 10.818 | 32.612 | 1.00 | 33.55 | H0   |    |
| ANISOU 6930 HB ILE C 36   | 3760    | 5030   | 3960   | -360 | 560   | -210 | H0 |
| ATOM 6931 HG12 ILE C 36   | -51.604 | 12.586 | 31.288 | 1.00 | 33.99 | H0   |    |
| ANISOU 6931 HG12 ILE C 36 | 3680    | 5090   | 4140   | -180 | 630   | -160 | H0 |
| ATOM 6932 HG13 ILE C 36   | -51.962 | 11.200 | 30.610 | 1.00 | 33.76 | H0   |    |
| ANISOU 6932 HG13 ILE C 36 | 3670    | 5130   | 4030   | -280 | 540   | -100 | H0 |
| ATOM 6933 HG21 ILE C 36   | -52.109 | 9.154  | 33.403 | 1.00 | 34.26 | H0   |    |
| ANISOU 6933 HG21 ILE C 36 | 3850    | 5280   | 3890   | -550 | 510   | -180 | H0 |
| ATOM 6934 HG22 ILE C 36   | -52.710 | 9.347  | 31.947 | 1.00 | 34.36 | H0   |    |
| ANISOU 6934 HG22 ILE C 36 | 3780    | 5330   | 3940   | -490 | 490   | -110 | H0 |
| ATOM 6935 HG23 ILE C 36   | -53.467 | 9.954  | 33.204 | 1.00 | 35.19 | H0   |    |
| ANISOU 6935 HG23 ILE C 36 | 3800    | 5530   | 4040   | -500 | 580   | -160 | H0 |
| ATOM 6936 HD11 ILE C 36   | -54.169 | 11.434 | 31.070 | 1.00 | 35.27 | H0   |    |
| ANISOU 6936 HD11 ILE C 36 | 3670    | 5550   | 4180   | -280 | 600   | -80  | H0 |

|                           |         |        |        |      |       |      |    |
|---------------------------|---------|--------|--------|------|-------|------|----|
| ATOM 6937 HD12 ILE C 36   | -53.714 | 12.865 | 30.555 | 1.00 | 35.27 | H0   |    |
| ANISOU 6937 HD12 ILE C 36 | 3660    | 5440   | 4300   | -120 | 640   | -90  | H0 |
| ATOM 6938 HD13 ILE C 36   | -53.903 | 12.605 | 32.108 | 1.00 | 35.57 | H0   |    |
| ANISOU 6938 HD13 ILE C 36 | 3690    | 5540   | 4280   | -190 | 690   | -160 | H0 |
| ATOM 6939 N ASN C 37      | -50.155 | 11.288 | 35.415 | 1.00 | 34.33 | N0   |    |
| ANISOU 6939 N ASN C 37    | 3920    | 5100   | 4020   | -420 | 640   | -350 | N0 |
| ATOM 6940 CA ASN C 37     | -49.543 | 10.596 | 36.573 | 1.00 | 34.87 | C0   |    |
| ANISOU 6940 CA ASN C 37   | 4080    | 5150   | 4020   | -510 | 610   | -400 | C0 |
| ATOM 6941 C ASN C 37      | -48.256 | 11.304 | 36.986 | 1.00 | 34.45 | C0   |    |
| ANISOU 6941 C ASN C 37    | 4080    | 4990   | 4020   | -460 | 630   | -460 | C0 |
| ATOM 6942 O ASN C 37      | -47.653 | 11.989 | 36.150 | 1.00 | 33.90 | O0   |    |
| ANISOU 6942 O ASN C 37    | 4000    | 4850   | 4030   | -380 | 640   | -460 | O0 |
| ATOM 6943 CB ASN C 37     | -49.292 | 9.115  | 36.277 | 1.00 | 34.80 | C0   |    |
| ANISOU 6943 CB ASN C 37   | 4160    | 5130   | 3930   | -600 | 500   | -350 | C0 |
| ATOM 6944 CG ASN C 37     | -49.657 | 8.217  | 37.440 | 1.00 | 35.58 | C0   |    |
| ANISOU 6944 CG ASN C 37   | 4320    | 5280   | 3920   | -740 | 470   | -350 | C0 |
| ATOM 6945 OD1 ASN C 37    | -49.448 | 8.570  | 38.605 | 1.00 | 35.32 | O0   |    |
| ANISOU 6945 OD1 ASN C 37  | 4300    | 5260   | 3860   | -760 | 510   | -400 | O0 |
| ATOM 6946 ND2 ASN C 37    | -50.217 | 7.060  | 37.127 | 1.00 | 35.77 | N0   |    |
| ANISOU 6946 ND2 ASN C 37  | 4380    | 5340   | 3860   | -840 | 390   | -290 | N0 |
| ATOM 6947 H ASN C 37      | -49.563 | 11.731 | 34.885 | 1.00 | 34.06 | H0   |    |
| ANISOU 6947 H ASN C 37    | 3900    | 4990   | 4040   | -360 | 640   | -360 | H0 |
| ATOM 6948 HA ASN C 37     | -50.178 | 10.646 | 37.326 | 1.00 | 35.38 | H0   |    |
| ANISOU 6948 HA ASN C 37   | 4110    | 5290   | 4040   | -550 | 650   | -410 | H0 |
| ATOM 6949 HB2 ASN C 37    | -49.818 | 8.855  | 35.494 | 1.00 | 34.81 | H0   |    |
| ANISOU 6949 HB2 ASN C 37  | 4130    | 5160   | 3930   | -600 | 480   | -300 | H0 |
| ATOM 6950 HB3 ASN C 37    | -48.345 | 8.990  | 36.061 | 1.00 | 34.30 | H0   |    |
| ANISOU 6950 HB3 ASN C 37  | 4150    | 4980   | 3890   | -580 | 460   | -360 | H0 |
| ATOM 6951 HD21 ASN C 37   | -50.842 | 6.717  | 37.649 | 1.00 | 36.37 | H0   |    |
| ANISOU 6951 HD21 ASN C 37 | 4460    | 5490   | 3870   | -930 | 400   | -270 | H0 |
| ATOM 6952 HD22 ASN C 37   | -49.966 | 6.630  | 36.397 | 1.00 | 35.47 | H0   |    |
| ANISOU 6952 HD22 ASN C 37 | 4380    | 5260   | 3840   | -820 | 340   | -260 | H0 |
| ATOM 6953 N ILE C 38      | -47.915 | 11.164 | 38.266 | 1.00 | 35.17 | N0   |    |
| ANISOU 6953 N ILE C 38    | 4220    | 5080   | 4050   | -520 | 630   | -510 | N0 |
| ATOM 6954 CA ILE C 38     | -46.580 | 11.474 | 38.847 | 1.00 | 35.09 | C0   |    |
| ANISOU 6954 CA ILE C 38   | 4280    | 4990   | 4060   | -510 | 610   | -580 | C0 |
| ATOM 6955 C ILE C 38      | -46.101 | 10.183 | 39.514 | 1.00 | 34.96 | C0   |    |
| ANISOU 6955 C ILE C 38    | 4360    | 4970   | 3950   | -610 | 510   | -570 | C0 |
| ATOM 6956 O ILE C 38      | -46.727 | 9.767  | 40.499 | 1.00 | 35.12 | O0   |    |
| ANISOU 6956 O ILE C 38    | 4400    | 5060   | 3880   | -700 | 520   | -570 | O0 |
| ATOM 6957 CB ILE C 38     | -46.654 | 12.667 | 39.823 | 1.00 | 36.07 | C0   |    |
| ANISOU 6957 CB ILE C 38   | 4380    | 5110   | 4210   | -490 | 710   | -660 | C0 |
| ATOM 6958 CG1 ILE C 38    | -47.239 | 13.913 | 39.150 | 1.00 | 36.58 | C0   |    |
| ANISOU 6958 CG1 ILE C 38  | 4370    | 5160   | 4370   | -380 | 790   | -660 | C0 |
| ATOM 6959 CG2 ILE C 38    | -45.285 | 12.947 | 40.427 | 1.00 | 36.11 | C0   |    |
| ANISOU 6959 CG2 ILE C 38  | 4460    | 5040   | 4220   | -500 | 690   | -720 | C0 |
| ATOM 6960 CD1 ILE C 38    | -47.739 | 14.962 | 40.114 | 1.00 | 37.61 | C0   |    |
| ANISOU 6960 CD1 ILE C 38  | 4470    | 5310   | 4510   | -350 | 890   | -740 | C0 |
| ATOM 6961 H ILE C 38      | -48.506 | 10.861 | 38.890 | 1.00 | 35.56 | H0   |    |
| ANISOU 6961 H ILE C 38    | 4270    | 5200   | 4040   | -580 | 640   | -520 | H0 |
| ATOM 6962 HA ILE C 38     | -45.968 | 11.701 | 38.125 | 1.00 | 34.68 | H0   |    |
| ANISOU 6962 HA ILE C 38   | 4230    | 4880   | 4070   | -460 | 600   | -570 | H0 |
| ATOM 6963 HB ILE C 38     | -47.262 | 12.413 | 40.560 | 1.00 | 36.57 | H0   |    |
| ANISOU 6963 HB ILE C 38   | 4440    | 5250   | 4210   | -540 | 730   | -670 | H0 |

|                           |         |        |        |      |       |      |    |
|---------------------------|---------|--------|--------|------|-------|------|----|
| ATOM 6964 HG12 ILE C 38   | -46.549 | 14.314 | 38.580 | 1.00 | 36.21 | H0   |    |
| ANISOU 6964 HG12 ILE C 38 | 4340    | 5040   | 4380   | -350 | 780   | -660 | H0 |
| ATOM 6965 HG13 ILE C 38   | -47.981 | 13.641 | 38.573 | 1.00 | 36.59 | H0   |    |
| ANISOU 6965 HG13 ILE C 38 | 4330    | 5210   | 4370   | -370 | 790   | -610 | H0 |
| ATOM 6966 HG21 ILE C 38   | -45.048 | 12.234 | 41.045 | 1.00 | 36.08 | H0   |    |
| ANISOU 6966 HG21 ILE C 38 | 4500    | 5060   | 4150   | -560 | 640   | -720 | H0 |
| ATOM 6967 HG22 ILE C 38   | -45.305 | 13.793 | 40.906 | 1.00 | 36.46 | H0   |    |
| ANISOU 6967 HG22 ILE C 38 | 4490    | 5070   | 4290   | -480 | 750   | -770 | H0 |
| ATOM 6968 HG23 ILE C 38   | -44.619 | 12.994 | 39.719 | 1.00 | 35.59 | H0   |    |
| ANISOU 6968 HG23 ILE C 38 | 4400    | 4920   | 4200   | -470 | 660   | -700 | H0 |
| ATOM 6969 HD11 ILE C 38   | -48.343 | 14.552 | 40.757 | 1.00 | 38.00 | H0   |    |
| ANISOU 6969 HD11 ILE C 38 | 4500    | 5440   | 4490   | -400 | 900   | -750 | H0 |
| ATOM 6970 HD12 ILE C 38   | -48.212 | 15.656 | 39.623 | 1.00 | 37.90 | H0   |    |
| ANISOU 6970 HD12 ILE C 38 | 4470    | 5330   | 4610   | -270 | 930   | -740 | H0 |
| ATOM 6971 HD13 ILE C 38   | -46.985 | 15.358 | 40.586 | 1.00 | 37.58 | H0   |    |
| ANISOU 6971 HD13 ILE C 38 | 4520    | 5240   | 4520   | -360 | 890   | -790 | H0 |
| ATOM 6972 N LEU C 39      | -45.065 | 9.561  | 38.951 | 1.00 | 35.46 | N0   |    |
| ANISOU 6972 N LEU C 39    | 4480    | 4970   | 4020   | -580 | 430   | -560 | N0 |
| ATOM 6973 CA LEU C 39     | -44.633 | 8.170  | 39.264 | 1.00 | 36.59 | C0   |    |
| ANISOU 6973 CA LEU C 39   | 4730    | 5090   | 4080   | -640 | 300   | -530 | C0 |
| ATOM 6974 C LEU C 39      | -43.486 | 8.192  | 40.278 | 1.00 | 37.41 | C0   |    |
| ANISOU 6974 C LEU C 39    | 4900    | 5150   | 4160   | -650 | 260   | -590 | C0 |
| ATOM 6975 O LEU C 39      | -43.424 | 7.292  | 41.133 | 1.00 | 37.03 | O0   |    |
| ANISOU 6975 O LEU C 39    | 4950    | 5100   | 4020   | -720 | 180   | -580 | O0 |
| ATOM 6976 CB LEU C 39     | -44.203 | 7.488  | 37.961 | 1.00 | 35.73 | C0   |    |
| ANISOU 6976 CB LEU C 39   | 4640    | 4930   | 4000   | -590 | 230   | -500 | C0 |
| ATOM 6977 CG LEU C 39     | -45.281 | 7.422  | 36.879 | 1.00 | 35.90 | C0   |    |
| ANISOU 6977 CG LEU C 39   | 4610    | 4990   | 4040   | -580 | 250   | -440 | C0 |
| ATOM 6978 CD1 LEU C 39    | -44.715 | 6.903  | 35.571 | 1.00 | 35.90 | C0   |    |
| ANISOU 6978 CD1 LEU C 39  | 4620    | 4950   | 4070   | -520 | 190   | -420 | C0 |
| ATOM 6979 CD2 LEU C 39    | -46.451 | 6.563  | 37.326 | 1.00 | 36.47 | C0   |    |
| ANISOU 6979 CD2 LEU C 39  | 4720    | 5120   | 4020   | -700 | 220   | -390 | C0 |
| ATOM 6980 H LEU C 39      | -44.549 | 9.961  | 38.316 | 1.00 | 35.13 | H0   |    |
| ANISOU 6980 H LEU C 39    | 4420    | 4890   | 4040   | -530 | 430   | -560 | H0 |
| ATOM 6981 HA LEU C 39     | -45.394 | 7.684  | 39.657 | 1.00 | 36.82 | H0   |    |
| ANISOU 6981 HA LEU C 39   | 4780    | 5160   | 4050   | -720 | 290   | -500 | H0 |
| ATOM 6982 HB2 LEU C 39    | -43.431 | 7.968  | 37.601 | 1.00 | 35.59 | H0   |    |
| ANISOU 6982 HB2 LEU C 39  | 4600    | 4890   | 4040   | -520 | 240   | -530 | H0 |
| ATOM 6983 HB3 LEU C 39    | -43.915 | 6.577  | 38.170 | 1.00 | 36.05 | H0   |    |
| ANISOU 6983 HB3 LEU C 39  | 4770    | 4940   | 3990   | -610 | 140   | -490 | H0 |
| ATOM 6984 HG LEU C 39     | -45.617 | 8.338  | 36.724 | 1.00 | 35.89 | H0   |    |
| ANISOU 6984 HG LEU C 39   | 4530    | 5020   | 4090   | -550 | 340   | -450 | H0 |
| ATOM 6985 HD11 LEU C 39   | -43.948 | 7.443  | 35.311 | 1.00 | 35.52 | H0   |    |
| ANISOU 6985 HD11 LEU C 39 | 4550    | 4880   | 4070   | -460 | 210   | -460 | H0 |
| ATOM 6986 HD12 LEU C 39   | -45.396 | 6.952  | 34.880 | 1.00 | 35.75 | H0   |    |
| ANISOU 6986 HD12 LEU C 39 | 4570    | 4960   | 4060   | -520 | 210   | -390 | H0 |
| ATOM 6987 HD13 LEU C 39   | -44.436 | 5.978  | 35.685 | 1.00 | 35.94 | H0   |    |
| ANISOU 6987 HD13 LEU C 39 | 4710    | 4920   | 4020   | -540 | 100   | -420 | H0 |
| ATOM 6988 HD21 LEU C 39   | -46.122 | 5.703  | 37.640 | 1.00 | 36.66 | H0   |    |
| ANISOU 6988 HD21 LEU C 39 | 4840    | 5110   | 3990   | -740 | 140   | -380 | H0 |
| ATOM 6989 HD22 LEU C 39   | -47.055 | 6.423  | 36.577 | 1.00 | 36.46 | H0   |    |
| ANISOU 6989 HD22 LEU C 39 | 4680    | 5150   | 4020   | -700 | 230   | -350 | H0 |
| ATOM 6990 HD23 LEU C 39   | -46.928 | 7.010  | 38.046 | 1.00 | 36.81 | H0   |    |
| ANISOU 6990 HD23 LEU C 39 | 4730    | 5220   | 4040   | -740 | 280   | -400 | H0 |



|                          |         |        |        |      |       |       |    |
|--------------------------|---------|--------|--------|------|-------|-------|----|
| ATOM 6991 N GLUC 40      | -42.606 | 9.185  | 40.174 | 1.00 | 39.01 |       | N0 |
| ANISOU 6991 N GLUC 40    | 5050    | 5330   | 4440   | -580 | 310   | -650  | N0 |
| ATOM 6992 CA GLUC 40     | -41.385 | 9.276  | 41.007 | 1.00 | 40.76 |       | C0 |
| ANISOU 6992 CA GLUC 40   | 5310    | 5530   | 4650   | -580 | 260   | -710  | C0 |
| ATOM 6993 C GLUC 40      | -41.013 | 10.743 | 41.205 | 1.00 | 39.50 |       | C0 |
| ANISOU 6993 C GLUC 40    | 5090    | 5360   | 4560   | -560 | 360   | -780  | C0 |
| ATOM 6994 O GLUC 40      | -41.165 | 11.554 | 40.264 | 1.00 | 38.31 |       | O0 |
| ANISOU 6994 O GLUC 40    | 4870    | 5200   | 4490   | -510 | 430   | -770  | O0 |
| ATOM 6995 CB GLUC 40     | -40.235 | 8.498  | 40.367 | 1.00 | 43.91 |       | C0 |
| ANISOU 6995 CB GLUC 40   | 5740    | 5890   | 5050   | -520 | 150   | -720  | C0 |
| ATOM 6996 CG GLUC 40     | -39.029 | 8.372  | 41.282 | 1.00 | 48.01 |       | C0 |
| ANISOU 6996 CG GLUC 40   | 6290    | 6410   | 5540   | -520 | 80    | -780  | C0 |
| ATOM 6997 CD GLUC 40     | -37.841 | 7.658  | 40.665 | 1.00 | 50.83 |       | C0 |
| ANISOU 6997 CD GLUC 40   | 6650    | 6750   | 5910   | -430 | -30   | -800  | C0 |
| ATOM 6998 OE1 GLUC 40    | -38.069 | 6.749  | 39.831 | 1.00 | 52.96 |       | O0 |
| ANISOU 6998 OE1 GLUC 40  | 6960    | 6990   | 6170   | -390 | -90   | -760  | O0 |
| ATOM 6999 OE2 GLUC 40    | -36.692 | 8.029  | 41.008 | 1.00 | 54.16 |       | O0 |
| ANISOU 6999 OE2 GLUC 40  | 7040    | 7200   | 6340   | -410 | -50   | -860  | O0 |
| ATOM 7000 H GLUC 40      | -42.695 | 9.864  | 39.575 | 1.00 | 38.67 |       | H0 |
| ANISOU 7000 H GLUC 40    | 4950    | 5280   | 4460   | -540 | 360   | -650  | H0 |
| ATOM 7001 HA GLUC 40     | -41.582 | 8.880  | 41.887 | 1.00 | 41.18 |       | H0 |
| ANISOU 7001 HA GLUC 40   | 5420    | 5600   | 4630   | -640 | 230   | -710  | H0 |
| ATOM 7002 HB2 GLUC 40    | -40.554 | 7.603  | 40.129 | 1.00 | 43.94 |       | H0 |
| ANISOU 7002 HB2 GLUC 40  | 5790    | 5880   | 5020   | -530 | 90    | -680  | H0 |
| ATOM 7003 HB3 GLUC 40    | -39.965 | 8.954  | 39.545 | 1.00 | 43.58 |       | H0 |
| ANISOU 7003 HB3 GLUC 40  | 5640    | 5850   | 5070   | -470 | 180   | -720  | H0 |
| ATOM 7004 HG2 GLUC 40    | -38.741 | 9.268  | 41.556 | 1.00 | 47.76 |       | H0 |
| ANISOU 7004 HG2 GLUC 40  | 6220    | 6390   | 5540   | -530 | 140   | -820  | H0 |
| ATOM 7005 HG3 GLUC 40    | -39.296 | 7.887  | 42.091 | 1.00 | 48.10 |       | H0 |
| ANISOU 7005 HG3 GLUC 40  | 6370    | 6420   | 5480   | -570 | 40    | -760  | H0 |
| ATOM 7006 N VALC 41      | -40.525 | 11.031 | 42.405 | 1.00 | 38.68 |       | N0 |
| ANISOU 7006 N VALC 41    | 5020    | 5270   | 4410   | -610 | 360   | -830  | N0 |
| ATOM 7007 CA VALC 41     | -40.065 | 12.360 | 42.879 | 1.00 | 38.65 |       | C0 |
| ANISOU 7007 CA VALC 41   | 4980    | 5250   | 4450   | -610 | 440   | -910  | C0 |
| ATOM 7008 C VALC 41      | -38.849 | 12.102 | 43.771 | 1.00 | 38.02 |       | C0 |
| ANISOU 7008 C VALC 41    | 4940    | 5180   | 4320   | -650 | 360   | -960  | C0 |
| ATOM 7009 O VALC 41      | -38.872 | 11.121 | 44.533 | 1.00 | 37.79 |       | O0 |
| ANISOU 7009 O VALC 41    | 4980    | 5180   | 4200   | -690 | 280   | -950  | O0 |
| ATOM 7010 CB VALC 41     | -41.204 | 13.072 | 43.629 | 1.00 | 40.04 |       | C0 |
| ANISOU 7010 CB VALC 41   | 5150    | 5450   | 4610   | -650 | 540   | -940  | C0 |
| ATOM 7011 CG1 VALC 41    | -40.694 | 14.111 | 44.608 | 1.00 | 41.19 |       | C0 |
| ANISOU 7011 CG1 VALC 41  | 5310    | 5580   | 4760   | -680 | 600   | -1030 | C0 |
| ATOM 7012 CG2 VALC 41    | -42.212 | 13.684 | 42.672 | 1.00 | 40.15 |       | C0 |
| ANISOU 7012 CG2 VALC 41  | 5100    | 5450   | 4700   | -580 | 630   | -900  | C0 |
| ATOM 7013 H VALC 41      | -40.442 | 10.391 | 43.048 | 1.00 | 39.17 |       | H0 |
| ANISOU 7013 H VALC 41    | 5130    | 5340   | 4410   | -650 | 300   | -830  | H0 |
| ATOM 7014 HA VALC 41     | -39.796 | 12.897 | 42.114 | 1.00 | 38.44 |       | H0 |
| ANISOU 7014 HA VALC 41   | 4910    | 5200   | 4490   | -570 | 470   | -910  | H0 |
| ATOM 7015 HB VALC 41     | -41.677 | 12.382 | 44.154 | 1.00 | 40.20 |       | H0 |
| ANISOU 7015 HB VALC 41   | 5210    | 5510   | 4560   | -690 | 520   | -920  | H0 |
| ATOM 7016 HG11 VALC 41   | -40.352 | 13.670 | 45.406 | 1.00 | 41.30 |       | H0 |
| ANISOU 7016 HG11 VALC 41 | 5370    | 5620   | 4700   | -730 | 550   | -1050 | H0 |
| ATOM 7017 HG12 VALC 41   | -41.420 | 14.709 | 44.855 | 1.00 | 41.39 |       | H0 |
| ANISOU 7017 HG12 VALC 41 | 5330    | 5610   | 4790   | -670 | 670   | -1060 | H0 |

|                           |         |        |        |      |       |       |    |
|---------------------------|---------|--------|--------|------|-------|-------|----|
| ATOM 7018 HG13 VAL C 41   | -39.982 | 14.621 | 44.189 | 1.00 | 40.89 | H0    |    |
| ANISOU 7018 HG13 VAL C 41 | 5260    | 5500   | 4770   | -650 | 600   | -1050 | H0 |
| ATOM 7019 HG21 VAL C 41   | -41.800 | 14.423 | 42.193 | 1.00 | 39.99 | H0    |    |
| ANISOU 7019 HG21 VAL C 41 | 5060    | 5380   | 4750   | -550 | 660   | -920  | H0 |
| ATOM 7020 HG22 VAL C 41   | -42.977 | 14.011 | 43.175 | 1.00 | 40.49 | H0    |    |
| ANISOU 7020 HG22 VAL C 41 | 5140    | 5530   | 4720   | -590 | 690   | -920  | H0 |
| ATOM 7021 HG23 VAL C 41   | -42.509 | 13.011 | 42.036 | 1.00 | 39.69 | H0    |    |
| ANISOU 7021 HG23 VAL C 41 | 5040    | 5410   | 4640   | -570 | 590   | -840  | H0 |
| ATOM 7022 N ASN C 42      | -37.812 | 12.921 | 43.650 | 1.00 | 37.20 | N0    |    |
| ANISOU 7022 N ASN C 42    | 4800    | 5060   | 4270   | -640 | 380   | -1020 | N0 |
| ATOM 7023 CA ASN C 42     | -36.584 | 12.808 | 44.476 | 1.00 | 37.64 | C0    |    |
| ANISOU 7023 CA ASN C 42   | 4870    | 5150   | 4280   | -670 | 300   | -1080 | C0 |
| ATOM 7024 C ASN C 42      | -36.243 | 14.206 | 44.999 | 1.00 | 37.39 | C0    |    |
| ANISOU 7024 C ASN C 42    | 4830    | 5100   | 4280   | -720 | 380   | -1160 | C0 |
| ATOM 7025 O ASN C 42      | -35.796 | 15.045 | 44.201 | 1.00 | 37.18 | O0    |    |
| ANISOU 7025 O ASN C 42    | 4750    | 5040   | 4330   | -710 | 430   | -1170 | O0 |
| ATOM 7026 CB ASN C 42     | -35.457 | 12.127 | 43.697 | 1.00 | 37.52 | C0    |    |
| ANISOU 7026 CB ASN C 42   | 4820    | 5150   | 4280   | -610 | 200   | -1070 | C0 |
| ATOM 7027 CG ASN C 42     | -34.260 | 11.802 | 44.565 | 1.00 | 38.43 | C0    |    |
| ANISOU 7027 CG ASN C 42   | 4940    | 5320   | 4340   | -630 | 100   | -1130 | C0 |
| ATOM 7028 OD1 ASN C 42    | -33.876 | 12.592 | 45.426 | 1.00 | 38.40 | O0    |    |
| ANISOU 7028 OD1 ASN C 42  | 4940    | 5330   | 4320   | -690 | 130   | -1190 | O0 |
| ATOM 7029 ND2 ASN C 42    | -33.651 | 10.650 | 44.335 | 1.00 | 38.75 | N0    |    |
| ANISOU 7029 ND2 ASN C 42  | 4990    | 5380   | 4350   | -560 | -30   | -1110 | N0 |
| ATOM 7030 H ASN C 42      | -37.792 | 13.605 | 43.047 | 1.00 | 37.28 | H0    |    |
| ANISOU 7030 H ASN C 42    | 4770    | 5050   | 4340   | -620 | 430   | -1020 | H0 |
| ATOM 7031 HA ASN C 42     | -36.790 | 12.233 | 45.249 | 1.00 | 37.78 | H0    |    |
| ANISOU 7031 HA ASN C 42   | 4940    | 5180   | 4230   | -700 | 250   | -1070 | H0 |
| ATOM 7032 HB2 ASN C 42    | -35.800 | 11.300 | 43.301 | 1.00 | 37.27 | H0    |    |
| ANISOU 7032 HB2 ASN C 42  | 4810    | 5120   | 4240   | -570 | 160   | -1020 | H0 |
| ATOM 7033 HB3 ASN C 42    | -35.174 | 12.717 | 42.969 | 1.00 | 37.40 | H0    |    |
| ANISOU 7033 HB3 ASN C 42  | 4750    | 5130   | 4330   | -590 | 250   | -1080 | H0 |
| ATOM 7034 HD21 ASN C 42   | -33.117 | 10.302 | 44.948 | 1.00 | 39.15 | H0    |    |
| ANISOU 7034 HD21 ASN C 42 | 5060    | 5460   | 4360   | -560 | -100  | -1130 | H0 |
| ATOM 7035 HD22 ASN C 42   | -33.776 | 10.228 | 43.568 | 1.00 | 38.33 | H0    |    |
| ANISOU 7035 HD22 ASN C 42 | 4920    | 5320   | 4320   | -510 | -40   | -1080 | H0 |
| ATOM 7036 N GLU C 43      | -36.470 | 14.425 | 46.297 | 1.00 | 37.88 | N0    |    |
| ANISOU 7036 N GLU C 43    | 4940    | 5180   | 4270   | -790 | 400   | -1210 | N0 |
| ATOM 7037 CA GLU C 43     | -36.283 | 15.717 | 47.008 | 1.00 | 38.82 | C0    |    |
| ANISOU 7037 CA GLU C 43   | 5070    | 5270   | 4400   | -840 | 480   | -1300 | C0 |
| ATOM 7038 C GLU C 43      | -34.820 | 16.172 | 46.907 | 1.00 | 39.07 | C0    |    |
| ANISOU 7038 C GLU C 43    | 5070    | 5310   | 4460   | -880 | 430   | -1350 | C0 |
| ATOM 7039 O GLU C 43      | -34.587 | 17.390 | 46.809 | 1.00 | 40.99 | O0    |    |
| ANISOU 7039 O GLU C 43    | 5310    | 5510   | 4760   | -910 | 510   | -1400 | O0 |
| ATOM 7040 CB GLU C 43     | -36.703 | 15.575 | 48.476 | 1.00 | 39.68 | C0    |    |
| ANISOU 7040 CB GLU C 43   | 5250    | 5420   | 4400   | -910 | 480   | -1340 | C0 |
| ATOM 7041 CG GLU C 43     | -38.188 | 15.301 | 48.670 | 1.00 | 39.88 | C0    |    |
| ANISOU 7041 CG GLU C 43   | 5290    | 5470   | 4390   | -900 | 540   | -1310 | C0 |
| ATOM 7042 CD GLU C 43     | -38.617 | 13.840 | 48.717 | 1.00 | 40.04 | C0    |    |
| ANISOU 7042 CD GLU C 43   | 5340    | 5540   | 4330   | -910 | 450   | -1220 | C0 |
| ATOM 7043 OE1 GLU C 43    | -39.638 | 13.552 | 49.385 | 1.00 | 41.30 | O0    |    |
| ANISOU 7043 OE1 GLU C 43  | 5530    | 5750   | 4410   | -960 | 490   | -1210 | O0 |
| ATOM 7044 OE2 GLU C 43    | -37.961 | 12.989 | 48.066 | 1.00 | 39.53 | O0    |    |
| ANISOU 7044 OE2 GLU C 43  | 5270    | 5460   | 4280   | -870 | 350   | -1160 | O0 |

|                           |         |        |        |       |       |       |    |
|---------------------------|---------|--------|--------|-------|-------|-------|----|
| ATOM 7045 H GLU C 43      | -36.748 | 13.757 | 46.848 | 1.00  | 38.09 | H0    |    |
| ANISOU 7045 H GLU C 43    | 5010    | 5230   | 4230   | -800  | 360   | -1190 | H0 |
| ATOM 7046 HA GLU C 43     | -36.854 | 16.394 | 46.578 | 1.00  | 38.73 | H0    |    |
| ANISOU 7046 HA GLU C 43   | 5050    | 5210   | 4450   | -820  | 560   | -1300 | H0 |
| ATOM 7047 HB2 GLU C 43    | -36.189 | 14.844 | 48.878 | 1.00  | 39.80 | H0    |    |
| ANISOU 7047 HB2 GLU C 43  | 5280    | 5480   | 4360   | -930  | 390   | -1330 | H0 |
| ATOM 7048 HB3 GLU C 43    | -36.469 | 16.401 | 48.947 | 1.00  | 40.26 | H0    |    |
| ANISOU 7048 HB3 GLU C 43  | 5340    | 5480   | 4480   | -950  | 520   | -1410 | H0 |
| ATOM 7049 HG2 GLU C 43    | -38.473 | 15.726 | 49.507 | 1.00  | 40.59 | H0    |    |
| ANISOU 7049 HG2 GLU C 43  | 5410    | 5580   | 4430   | -940  | 590   | -1360 | H0 |
| ATOM 7050 HG3 GLU C 43    | -38.681 | 15.738 | 47.943 | 1.00  | 39.64 | H0    |    |
| ANISOU 7050 HG3 GLU C 43  | 5230    | 5400   | 4430   | -850  | 600   | -1290 | H0 |
| ATOM 7051 N ILE C 44      | -33.868 | 15.238 | 46.943 | 1.00  | 38.74 | N0    |    |
| ANISOU 7051 N ILE C 44    | 5000    | 5340   | 4380   | -860  | 310   | -1340 | N0 |
| ATOM 7052 CA ILE C 44     | -32.409 | 15.546 | 47.003 | 1.00  | 39.48 | C0    |    |
| ANISOU 7052 CA ILE C 44   | 5040    | 5490   | 4470   | -900  | 260   | -1390 | C0 |
| ATOM 7053 C ILE C 44      | -31.883 | 15.889 | 45.602 | 1.00  | 39.51 | C0    |    |
| ANISOU 7053 C ILE C 44    | 4950    | 5490   | 4570   | -870  | 280   | -1370 | C0 |
| ATOM 7054 O ILE C 44      | -31.119 | 16.883 | 45.483 | 1.00  | 40.43 | O0    |    |
| ANISOU 7054 O ILE C 44    | 5030    | 5610   | 4720   | -940  | 320   | -1420 | O0 |
| ATOM 7055 CB ILE C 44     | -31.642 | 14.390 | 47.678 | 1.00  | 39.99 | C0    |    |
| ANISOU 7055 CB ILE C 44   | 5110    | 5640   | 4450   | -880  | 110   | -1390 | C0 |
| ATOM 7056 CG1 ILE C 44    | -31.876 | 14.420 | 49.194 | 1.00  | 41.50 | C0    |    |
| ANISOU 7056 CG1 ILE C 44  | 5390    | 5840   | 4540   | -960  | 90    | -1430 | C0 |
| ATOM 7057 CG2 ILE C 44    | -30.162 | 14.432 | 47.328 | 1.00  | 40.04 | C0    |    |
| ANISOU 7057 CG2 ILE C 44  | 5010    | 5730   | 4470   | -880  | 40    | -1440 | C0 |
| ATOM 7058 CD1 ILE C 44    | -31.193 | 13.308 | 49.963 | 1.00  | 42.49 | C0    |    |
| ANISOU 7058 CD1 ILE C 44  | 5540    | 6040   | 4570   | -950  | -70   | -1420 | C0 |
| ATOM 7059 H ILE C 44      | -34.052 | 14.347 | 46.936 | 1.00  | 38.59 | H0    |    |
| ANISOU 7059 H ILE C 44    | 5000    | 5340   | 4320   | -830  | 250   | -1290 | H0 |
| ATOM 7060 HA ILE C 44     | -32.297 | 16.336 | 47.561 | 1.00  | 40.10 | H0    |    |
| ANISOU 7060 HA ILE C 44   | 5140    | 5550   | 4550   | -970  | 300   | -1450 | H0 |
| ATOM 7061 HB ILE C 44     | -32.011 | 13.540 | 47.333 | 1.00  | 39.57 | H0    |    |
| ANISOU 7061 HB ILE C 44   | 5070    | 5570   | 4390   | -820  | 70    | -1340 | H0 |
| ATOM 7062 HG12 ILE C 44   | -31.558 | 15.280 | 49.542 | 1.00  | 41.91 | H0    |    |
| ANISOU 7062 HG12 ILE C 44 | 5430    | 5890   | 4600   | -1020 | 130   | -1490 | H0 |
| ATOM 7063 HG13 ILE C 44   | -32.841 | 14.368 | 49.362 | 1.00  | 41.17 | H0    |    |
| ANISOU 7063 HG13 ILE C 44 | 5390    | 5760   | 4490   | -960  | 140   | -1410 | H0 |
| ATOM 7064 HG21 ILE C 44   | -30.039 | 14.198 | 46.392 | 1.00  | 39.79 | H0    |    |
| ANISOU 7064 HG21 ILE C 44 | 4930    | 5700   | 4490   | -820  | 40    | -1410 | H0 |
| ATOM 7065 HG22 ILE C 44   | -29.676 | 13.797 | 47.881 | 1.00  | 40.61 | H0    |    |
| ANISOU 7065 HG22 ILE C 44 | 5090    | 5850   | 4490   | -860  | -60   | -1450 | H0 |
| ATOM 7066 HG23 ILE C 44   | -29.814 | 15.327 | 47.485 | 1.00  | 40.62 | H0    |    |
| ANISOU 7066 HG23 ILE C 44 | 5060    | 5800   | 4570   | -950  | 90    | -1480 | H0 |
| ATOM 7067 HD11 ILE C 44   | -31.237 | 12.483 | 49.450 | 1.00  | 41.98 | H0    |    |
| ANISOU 7067 HD11 ILE C 44 | 5470    | 5970   | 4510   | -870  | -130  | -1370 | H0 |
| ATOM 7068 HD12 ILE C 44   | -31.640 | 13.182 | 50.818 | 1.00  | 42.69 | H0    |    |
| ANISOU 7068 HD12 ILE C 44 | 5630    | 6060   | 4520   | -990  | -70   | -1420 | H0 |
| ATOM 7069 HD13 ILE C 44   | -30.262 | 13.543 | 50.118 | 1.00  | 42.88 | H0    |    |
| ANISOU 7069 HD13 ILE C 44 | 5540    | 6140   | 4620   | -960  | -110  | -1470 | H0 |
| ATOM 7070 N THR C 45      | -32.243 | 15.113 | 44.576 | 1.00  | 38.63 | N0    |    |
| ANISOU 7070 N THR C 45    | 4820    | 5370   | 4490   | -780  | 270   | -1300 | N0 |
| ATOM 7071 CA THR C 45     | -31.734 | 15.325 | 43.193 | 1.00  | 38.72 | C0    |    |
| ANISOU 7071 CA THR C 45   | 4740    | 5400   | 4570   | -740  | 290   | -1280 | C0 |

|                           |         |        |        |       |       |       |    |
|---------------------------|---------|--------|--------|-------|-------|-------|----|
| ATOM 7072 C THR C 45      | -32.616 | 16.348 | 42.463 | 1.00  | 38.78 | C0    |    |
| ANISOU 7072 C THR C 45    | 4770    | 5320   | 4650   | -760  | 410   | -1240 | C0 |
| ATOM 7073 O THR C 45      | -32.172 | 16.836 | 41.404 | 1.00  | 38.92 | O0    |    |
| ANISOU 7073 O THR C 45    | 4730    | 5340   | 4720   | -770  | 450   | -1220 | O0 |
| ATOM 7074 CB THR C 45     | -31.609 | 14.008 | 42.421 | 1.00  | 38.05 | C0    |    |
| ANISOU 7074 CB THR C 45   | 4620    | 5370   | 4470   | -640  | 200   | -1230 | C0 |
| ATOM 7075 OG1 THR C 45    | -32.924 | 13.534 | 42.147 | 1.00  | 37.85 | O0    |    |
| ANISOU 7075 OG1 THR C 45  | 4660    | 5270   | 4450   | -590  | 230   | -1160 | O0 |
| ATOM 7076 CG2 THR C 45    | -30.828 | 12.955 | 43.175 | 1.00  | 38.69 | C0    |    |
| ANISOU 7076 CG2 THR C 45  | 4700    | 5520   | 4480   | -600  | 70    | -1260 | C0 |
| ATOM 7077 H THR C 45      | -32.818 | 14.409 | 44.644 | 1.00  | 38.38 | H0    |    |
| ANISOU 7077 H THR C 45    | 4820    | 5330   | 4430   | -740  | 240   | -1260 | H0 |
| ATOM 7078 HA THR C 45     | -30.831 | 15.711 | 43.270 | 1.00  | 39.24 | H0    |    |
| ANISOU 7078 HA THR C 45   | 4760    | 5520   | 4630   | -790  | 280   | -1320 | H0 |
| ATOM 7079 HB THR C 45     | -31.152 | 14.192 | 41.567 | 1.00  | 38.22 | H0    |    |
| ANISOU 7079 HB THR C 45   | 4580    | 5420   | 4520   | -620  | 220   | -1230 | H0 |
| ATOM 7080 HG21 THR C 45   | -30.011 | 13.349 | 43.532 | 1.00  | 39.26 | H0    |    |
| ANISOU 7080 HG21 THR C 45 | 4730    | 5650   | 4540   | -640  | 50    | -1310 | H0 |
| ATOM 7081 HG22 THR C 45   | -30.598 | 12.226 | 42.572 | 1.00  | 38.51 | H0    |    |
| ANISOU 7081 HG22 THR C 45 | 4650    | 5520   | 4450   | -520  | 10    | -1250 | H0 |
| ATOM 7082 HG23 THR C 45   | -31.368 | 12.611 | 43.909 | 1.00  | 38.62 | H0    |    |
| ANISOU 7082 HG23 THR C 45 | 4770    | 5480   | 4430   | -610  | 40    | -1250 | H0 |
| ATOM 7083 N ASN C 46      | -33.803 | 16.662 | 43.002 | 1.00  | 38.56 | N0    |    |
| ANISOU 7083 N ASN C 46    | 4820    | 5210   | 4620   | -760  | 470   | -1230 | N0 |
| ATOM 7084 CA ASN C 46     | -34.795 | 17.572 | 42.369 | 1.00  | 38.58 | C0    |    |
| ANISOU 7084 CA ASN C 46   | 4850    | 5120   | 4690   | -740  | 580   | -1200 | C0 |
| ATOM 7085 C ASN C 46      | -35.144 | 17.024 | 40.981 | 1.00  | 37.92 | C0    |    |
| ANISOU 7085 C ASN C 46    | 4720    | 5040   | 4650   | -670  | 570   | -1110 | C0 |
| ATOM 7086 O ASN C 46      | -34.938 | 17.739 | 39.978 | 1.00  | 36.99 | O0    |    |
| ANISOU 7086 O ASN C 46    | 4570    | 4890   | 4590   | -680  | 620   | -1080 | O0 |
| ATOM 7087 CB ASN C 46     | -34.270 | 19.008 | 42.298 | 1.00  | 39.75 | C0    |    |
| ANISOU 7087 CB ASN C 46   | 5010    | 5200   | 4890   | -820  | 640   | -1240 | C0 |
| ATOM 7088 CG ASN C 46     | -34.397 | 19.743 | 43.613 | 1.00  | 40.80 | C0    |    |
| ANISOU 7088 CG ASN C 46   | 5220    | 5290   | 5000   | -880  | 670   | -1330 | C0 |
| ATOM 7089 OD1 ASN C 46    | -35.478 | 19.790 | 44.194 | 1.00  | 40.38 | O0    |    |
| ANISOU 7089 OD1 ASN C 46  | 5210    | 5200   | 4930   | -840  | 710   | -1340 | O0 |
| ATOM 7090 ND2 ASN C 46    | -33.303 | 20.329 | 44.074 | 1.00  | 41.72 | N0    |    |
| ANISOU 7090 ND2 ASN C 46  | 5330    | 5420   | 5100   | -980  | 650   | -1400 | N0 |
| ATOM 7091 H ASN C 46      | -34.083 | 16.327 | 43.800 | 1.00  | 38.71 | H0    |    |
| ANISOU 7091 H ASN C 46    | 4880    | 5240   | 4590   | -770  | 450   | -1250 | H0 |
| ATOM 7092 HA ASN C 46     | -35.611 | 17.574 | 42.921 | 1.00  | 38.65 | H0    |    |
| ANISOU 7092 HA ASN C 46   | 4900    | 5100   | 4690   | -730  | 600   | -1200 | H0 |
| ATOM 7093 HB2 ASN C 46    | -33.330 | 18.990 | 42.030 | 1.00  | 39.91 | H0    |    |
| ANISOU 7093 HB2 ASN C 46  | 4990    | 5270   | 4910   | -860  | 610   | -1250 | H0 |
| ATOM 7094 HB3 ASN C 46    | -34.767 | 19.497 | 41.614 | 1.00  | 39.65 | H0    |    |
| ANISOU 7094 HB3 ASN C 46  | 5010    | 5130   | 4930   | -800  | 690   | -1200 | H0 |
| ATOM 7095 HD21 ASN C 46   | -33.251 | 20.558 | 44.927 | 1.00  | 42.16 | H0    |    |
| ANISOU 7095 HD21 ASN C 46 | 5430    | 5470   | 5120   | -1020 | 650   | -1450 | H0 |
| ATOM 7096 HD22 ASN C 46   | -32.624 | 20.494 | 43.530 | 1.00  | 41.81 | H0    |    |
| ANISOU 7096 HD22 ASN C 46 | 5300    | 5460   | 5130   | -1010 | 640   | -1390 | H0 |
| ATOM 7097 N GLU C 47      | -35.613 | 15.779 | 40.936 | 1.00  | 37.80 | N0    |    |
| ANISOU 7097 N GLU C 47    | 4700    | 5070   | 4590   | -610  | 510   | -1070 | N0 |
| ATOM 7098 CA GLU C 47     | -36.063 | 15.096 | 39.698 | 1.00  | 37.74 | C0    |    |
| ANISOU 7098 CA GLU C 47   | 4670    | 5070   | 4600   | -540  | 500   | -990  | C0 |

|                          |         |        |        |      |       |       |    |
|--------------------------|---------|--------|--------|------|-------|-------|----|
| ATOM 7099 C GLUC 47      | -37.478 | 14.557 | 39.925 | 1.00 | 38.17 | C0    |    |
| ANISOU 7099 C GLUC 47    | 4760    | 5110   | 4640   | -510 | 510   | -940  | C0 |
| ATOM 7100 O GLUC 47      | -37.803 | 14.158 | 41.067 | 1.00 | 38.19 | O0    |    |
| ANISOU 7100 O GLUC 47    | 4810    | 5120   | 4580   | -540 | 490   | -970  | O0 |
| ATOM 7101 CB GLUC 47     | -35.077 | 13.997 | 39.300 | 1.00 | 37.51 | C0    |    |
| ANISOU 7101 CB GLUC 47   | 4600    | 5120   | 4540   | -510 | 400   | -1000 | C0 |
| ATOM 7102 CG GLUC 47     | -33.674 | 14.519 | 39.043 | 1.00 | 38.35 | C0    |    |
| ANISOU 7102 CG GLUC 47   | 4630    | 5280   | 4660   | -540 | 390   | -1050 | C0 |
| ATOM 7103 CD GLUC 47     | -32.641 | 13.459 | 38.704 | 1.00 | 39.04 | C0    |    |
| ANISOU 7103 CD GLUC 47   | 4660    | 5460   | 4710   | -480 | 290   | -1080 | C0 |
| ATOM 7104 OE1 GLUC 47    | -33.044 | 12.295 | 38.473 | 1.00 | 39.74 | O0    |    |
| ANISOU 7104 OE1 GLUC 47  | 4780    | 5550   | 4770   | -400 | 220   | -1050 | O0 |
| ATOM 7105 OE2 GLUC 47    | -31.439 | 13.799 | 38.660 | 1.00 | 39.33 | O0    |    |
| ANISOU 7105 OE2 GLUC 47  | 4620    | 5580   | 4740   | -510 | 280   | -1130 | O0 |
| ATOM 7106 H GLUC 47      | -35.687 | 15.261 | 41.683 | 1.00 | 37.89 | H0    |    |
| ANISOU 7106 H GLUC 47    | 4740    | 5100   | 4550   | -620 | 470   | -1090 | H0 |
| ATOM 7107 HA GLUC 47     | -36.096 | 15.761 | 38.977 | 1.00 | 37.78 | H0    |    |
| ANISOU 7107 HA GLUC 47   | 4650    | 5050   | 4660   | -540 | 550   | -970  | H0 |
| ATOM 7108 HB2 GLUC 47    | -35.044 | 13.329 | 40.017 | 1.00 | 37.67 | H0    |    |
| ANISOU 7108 HB2 GLUC 47  | 4650    | 5150   | 4510   | -500 | 340   | -1010 | H0 |
| ATOM 7109 HB3 GLUC 47    | -35.408 | 13.556 | 38.490 | 1.00 | 37.23 | H0    |    |
| ANISOU 7109 HB3 GLUC 47  | 4550    | 5080   | 4510   | -460 | 390   | -950  | H0 |
| ATOM 7110 HG2 GLUC 47    | -33.708 | 15.163 | 38.303 | 1.00 | 38.42 | H0    |    |
| ANISOU 7110 HG2 GLUC 47  | 4620    | 5270   | 4710   | -550 | 450   | -1030 | H0 |
| ATOM 7111 HG3 GLUC 47    | -33.366 | 15.003 | 39.838 | 1.00 | 38.82 | H0    |    |
| ANISOU 7111 HG3 GLUC 47  | 4710    | 5340   | 4710   | -590 | 400   | -1100 | H0 |
| ATOM 7112 N VALC 48      | -38.288 | 14.572 | 38.867 | 1.00 | 38.53 | N0    |    |
| ANISOU 7112 N VALC 48    | 4790    | 5130   | 4720   | -470 | 540   | -880  | N0 |
| ATOM 7113 CA VALC 48     | -39.688 | 14.062 | 38.853 | 1.00 | 38.41 | C0    |    |
| ANISOU 7113 CA VALC 48   | 4790    | 5120   | 4680   | -440 | 550   | -820  | C0 |
| ATOM 7114 C VALC 48      | -39.863 | 13.208 | 37.589 | 1.00 | 38.24 | C0    |    |
| ANISOU 7114 C VALC 48    | 4740    | 5120   | 4670   | -400 | 510   | -760  | C0 |
| ATOM 7115 O VALC 48      | -39.281 | 13.560 | 36.546 | 1.00 | 38.01 | O0    |    |
| ANISOU 7115 O VALC 48    | 4670    | 5090   | 4680   | -380 | 520   | -740  | O0 |
| ATOM 7116 CB VALC 48     | -40.698 | 15.223 | 38.932 | 1.00 | 38.85 | C0    |    |
| ANISOU 7116 CB VALC 48   | 4830    | 5140   | 4790   | -430 | 660   | -820  | C0 |
| ATOM 7117 CG1 VALC 48    | -40.487 | 16.061 | 40.183 | 1.00 | 39.76 | C0    |    |
| ANISOU 7117 CG1 VALC 48  | 4980    | 5230   | 4900   | -470 | 700   | -910  | C0 |
| ATOM 7118 CG2 VALC 48    | -40.651 | 16.107 | 37.697 | 1.00 | 39.26 | C0    |    |
| ANISOU 7118 CG2 VALC 48  | 4860    | 5140   | 4920   | -390 | 700   | -780  | C0 |
| ATOM 7119 H VALC 48      | -38.023 | 14.904 | 38.061 | 1.00 | 38.31 | H0    |    |
| ANISOU 7119 H VALC 48    | 4730    | 5100   | 4730   | -450 | 560   | -860  | H0 |
| ATOM 7120 HA VALC 48     | -39.812 | 13.492 | 39.630 | 1.00 | 38.55 | H0    |    |
| ANISOU 7120 HA VALC 48   | 4840    | 5170   | 4650   | -470 | 520   | -840  | H0 |
| ATOM 7121 HB VALC 48     | -41.602 | 14.826 | 38.984 | 1.00 | 38.91 | H0    |    |
| ANISOU 7121 HB VALC 48   | 4840    | 5170   | 4770   | -420 | 660   | -790  | H0 |
| ATOM 7122 HG11 VALC 48   | -40.247 | 15.481 | 40.926 | 1.00 | 39.71 | H0    |    |
| ANISOU 7122 HG11 VALC 48 | 5000    | 5260   | 4830   | -510 | 660   | -930  | H0 |
| ATOM 7123 HG12 VALC 48   | -41.307 | 16.539 | 40.396 | 1.00 | 40.02 | H0    |    |
| ANISOU 7123 HG12 VALC 48 | 5020    | 5250   | 4940   | -450 | 760   | -920  | H0 |
| ATOM 7124 HG13 VALC 48   | -39.770 | 16.701 | 40.029 | 1.00 | 39.88 | H0    |    |
| ANISOU 7124 HG13 VALC 48 | 5000    | 5200   | 4950   | -480 | 710   | -930  | H0 |
| ATOM 7125 HG21 VALC 48   | -39.732 | 16.373 | 37.520 | 1.00 | 39.20 | H0    |    |
| ANISOU 7125 HG21 VALC 48 | 4850    | 5120   | 4930   | -410 | 690   | -810  | H0 |

|                           |         |        |        |      |       |      |    |
|---------------------------|---------|--------|--------|------|-------|------|----|
| ATOM 7126 HG22 VAL C 48   | -41.193 | 16.901 | 37.847 | 1.00 | 39.56 | H0   |    |
| ANISOU 7126 HG22 VAL C 48 | 4900    | 5140   | 4990   | -370 | 760   | -790 | H0 |
| ATOM 7127 HG23 VAL C 48   | -41.001 | 15.619 | 36.932 | 1.00 | 38.79 | H0   |    |
| ANISOU 7127 HG23 VAL C 48 | 4770    | 5100   | 4860   | -360 | 680   | -730 | H0 |
| ATOM 7128 N ASP C 49      | -40.603 | 12.106 | 37.704 | 1.00 | 38.65 | N0   |    |
| ANISOU 7128 N ASP C 49    | 4820    | 5200   | 4660   | -400 | 460   | -720 | N0 |
| ATOM 7129 CA ASP C 49     | -40.956 | 11.185 | 36.590 | 1.00 | 38.54 | C0   |    |
| ANISOU 7129 CA ASP C 49   | 4800    | 5200   | 4630   | -370 | 400   | -660 | C0 |
| ATOM 7130 C ASP C 49      | -42.468 | 11.292 | 36.411 | 1.00 | 37.57 | C0   |    |
| ANISOU 7130 C ASP C 49    | 4660    | 5100   | 4510   | -380 | 450   | -600 | C0 |
| ATOM 7131 O ASP C 49      | -43.191 | 10.882 | 37.342 | 1.00 | 38.42 | O0   |    |
| ANISOU 7131 O ASP C 49    | 4800    | 5240   | 4560   | -430 | 450   | -600 | O0 |
| ATOM 7132 CB ASP C 49     | -40.484 | 9.761  | 36.900 | 1.00 | 39.88 | C0   |    |
| ANISOU 7132 CB ASP C 49   | 5040    | 5380   | 4730   | -380 | 290   | -660 | C0 |
| ATOM 7133 CG ASP C 49     | -40.557 | 8.775  | 35.744 | 1.00 | 40.42 | C0   |    |
| ANISOU 7133 CG ASP C 49   | 5120    | 5450   | 4780   | -340 | 220   | -620 | C0 |
| ATOM 7134 OD1 ASP C 49    | -41.148 | 9.118  | 34.703 | 1.00 | 40.26 | O0   |    |
| ANISOU 7134 OD1 ASP C 49  | 5060    | 5440   | 4800   | -320 | 270   | -580 | O0 |
| ATOM 7135 OD2 ASP C 49    | -40.044 | 7.645  | 35.913 | 1.00 | 41.79 | O0   |    |
| ANISOU 7135 OD2 ASP C 49  | 5360    | 5610   | 4910   | -320 | 110   | -640 | O0 |
| ATOM 7136 H ASP C 49      | -40.951 | 11.842 | 38.503 | 1.00 | 38.75 | H0   |    |
| ANISOU 7136 H ASP C 49    | 4870    | 5230   | 4630   | -440 | 450   | -730 | H0 |
| ATOM 7137 HA ASP C 49     | -40.511 | 11.496 | 35.767 | 1.00 | 38.40 | H0   |    |
| ANISOU 7137 HA ASP C 49   | 4750    | 5180   | 4650   | -340 | 420   | -650 | H0 |
| ATOM 7138 HB2 ASP C 49    | -39.555 | 9.799  | 37.207 | 1.00 | 39.86 | H0   |    |
| ANISOU 7138 HB2 ASP C 49  | 5040    | 5370   | 4730   | -370 | 260   | -710 | H0 |
| ATOM 7139 HB3 ASP C 49    | -41.030 | 9.405  | 37.631 | 1.00 | 39.92 | H0   |    |
| ANISOU 7139 HB3 ASP C 49  | 5090    | 5390   | 4690   | -420 | 270   | -650 | H0 |
| ATOM 7140 N VAL C 50      | -42.913 | 11.881 | 35.299 | 1.00 | 36.11 | N0   |    |
| ANISOU 7140 N VAL C 50    | 4430    | 4910   | 4380   | -340 | 500   | -550 | N0 |
| ATOM 7141 CA VAL C 50     | -44.332 | 12.274 | 35.069 | 1.00 | 35.99 | C0   |    |
| ANISOU 7141 CA VAL C 50   | 4370    | 4930   | 4380   | -320 | 560   | -510 | C0 |
| ATOM 7142 C VAL C 50      | -44.840 | 11.663 | 33.759 | 1.00 | 35.54 | C0   |    |
| ANISOU 7142 C VAL C 50    | 4290    | 4900   | 4320   | -300 | 520   | -430 | C0 |
| ATOM 7143 O VAL C 50      | -44.019 | 11.405 | 32.846 | 1.00 | 33.87 | O0   |    |
| ANISOU 7143 O VAL C 50    | 4080    | 4670   | 4120   | -280 | 480   | -430 | O0 |
| ATOM 7144 CB VAL C 50     | -44.497 | 13.805 | 35.068 | 1.00 | 37.16 | C0   |    |
| ANISOU 7144 CB VAL C 50   | 4480    | 5030   | 4610   | -280 | 650   | -520 | C0 |
| ATOM 7145 CG1 VAL C 50    | -44.200 | 14.402 | 36.434 | 1.00 | 38.39 | C0   |    |
| ANISOU 7145 CG1 VAL C 50  | 4660    | 5160   | 4760   | -300 | 690   | -600 | C0 |
| ATOM 7146 CG2 VAL C 50    | -43.641 | 14.478 | 34.012 | 1.00 | 37.85 | C0   |    |
| ANISOU 7146 CG2 VAL C 50  | 4560    | 5060   | 4760   | -250 | 660   | -510 | C0 |
| ATOM 7147 H VAL C 50      | -42.368 | 12.068 | 34.594 | 1.00 | 36.21 | H0   |    |
| ANISOU 7147 H VAL C 50    | 4420    | 4910   | 4420   | -310 | 500   | -550 | H0 |
| ATOM 7148 HA VAL C 50     | -44.867 | 11.913 | 35.798 | 1.00 | 36.37 | H0   |    |
| ANISOU 7148 HA VAL C 50   | 4430    | 5010   | 4390   | -360 | 550   | -510 | H0 |
| ATOM 7149 HB VAL C 50     | -45.444 | 13.999 | 34.856 | 1.00 | 37.58 | H0   |    |
| ANISOU 7149 HB VAL C 50   | 4500    | 5110   | 4670   | -250 | 680   | -490 | H0 |
| ATOM 7150 HG11 VAL C 50   | -44.747 | 13.962 | 37.108 | 1.00 | 38.28 | H0   |    |
| ANISOU 7150 HG11 VAL C 50 | 4650    | 5190   | 4700   | -330 | 690   | -610 | H0 |
| ATOM 7151 HG12 VAL C 50   | -44.403 | 15.354 | 36.425 | 1.00 | 38.52 | H0   |    |
| ANISOU 7151 HG12 VAL C 50 | 4670    | 5140   | 4830   | -270 | 750   | -620 | H0 |
| ATOM 7152 HG13 VAL C 50   | -43.259 | 14.274 | 36.647 | 1.00 | 37.95 | H0   |    |
| ANISOU 7152 HG13 VAL C 50 | 4640    | 5090   | 4700   | -330 | 660   | -630 | H0 |

|                           |         |        |        |      |       |      |    |
|---------------------------|---------|--------|--------|------|-------|------|----|
| ATOM 7153 HG21 VAL C 50   | -42.701 | 14.327 | 34.210 | 1.00 | 37.44 | H0   |    |
| ANISOU 7153 HG21 VAL C 50 | 4530    | 5000   | 4690   | -270 | 630   | -540 | H0 |
| ATOM 7154 HG22 VAL C 50   | -43.820 | 15.435 | 34.011 | 1.00 | 37.99 | H0   |    |
| ANISOU 7154 HG22 VAL C 50 | 4570    | 5040   | 4820   | -220 | 710   | -510 | H0 |
| ATOM 7155 HG23 VAL C 50   | -43.851 | 14.110 | 33.137 | 1.00 | 37.39 | H0   |    |
| ANISOU 7155 HG23 VAL C 50 | 4490    | 5030   | 4690   | -230 | 630   | -460 | H0 |
| ATOM 7156 N VAL C 51      | -46.159 | 11.452 | 33.697 | 1.00 | 35.06 | N0   |    |
| ANISOU 7156 N VAL C 51    | 4190    | 4900   | 4240   | -320 | 530   | -390 | N0 |
| ATOM 7157 CA VAL C 51     | -46.922 | 11.083 | 32.473 | 1.00 | 35.03 | C0   |    |
| ANISOU 7157 CA VAL C 51   | 4150    | 4940   | 4230   | -300 | 510   | -320 | C0 |
| ATOM 7158 C VAL C 51      | -47.877 | 12.238 | 32.180 | 1.00 | 35.39 | C0   |    |
| ANISOU 7158 C VAL C 51    | 4110    | 5010   | 4330   | -240 | 580   | -290 | C0 |
| ATOM 7159 O VAL C 51      | -48.600 | 12.664 | 33.110 | 1.00 | 35.82 | O0   |    |
| ANISOU 7159 O VAL C 51    | 4130    | 5100   | 4380   | -240 | 630   | -310 | O0 |
| ATOM 7160 CB VAL C 51     | -47.683 | 9.754  | 32.642 | 1.00 | 35.43 | C0   |    |
| ANISOU 7160 CB VAL C 51   | 4220    | 5050   | 4190   | -380 | 440   | -280 | C0 |
| ATOM 7161 CG1 VAL C 51    | -48.436 | 9.370  | 31.374 | 1.00 | 35.44 | C0   |    |
| ANISOU 7161 CG1 VAL C 51  | 4190    | 5100   | 4180   | -380 | 410   | -210 | C0 |
| ATOM 7162 CG2 VAL C 51    | -46.761 | 8.628  | 33.082 | 1.00 | 35.00 | C0   |    |
| ANISOU 7162 CG2 VAL C 51  | 4280    | 4950   | 4080   | -430 | 350   | -320 | C0 |
| ATOM 7163 H VAL C 51      | -46.692 | 11.524 | 34.432 | 1.00 | 35.55 | H0   |    |
| ANISOU 7163 H VAL C 51    | 4240    | 4990   | 4280   | -340 | 560   | -400 | H0 |
| ATOM 7164 HA VAL C 51     | -46.299 | 10.994 | 31.734 | 1.00 | 34.77 | H0   |    |
| ANISOU 7164 HA VAL C 51   | 4130    | 4880   | 4210   | -280 | 480   | -310 | H0 |
| ATOM 7165 HB VAL C 51     | -48.352 | 9.888  | 33.358 | 1.00 | 35.72 | H0   |    |
| ANISOU 7165 HB VAL C 51   | 4230    | 5130   | 4210   | -410 | 470   | -290 | H0 |
| ATOM 7166 HG11 VAL C 51   | -49.179 | 9.982  | 31.237 | 1.00 | 35.79 | H0   |    |
| ANISOU 7166 HG11 VAL C 51 | 4160    | 5190   | 4250   | -350 | 460   | -190 | H0 |
| ATOM 7167 HG12 VAL C 51   | -48.777 | 8.463  | 31.460 | 1.00 | 35.58 | H0   |    |
| ANISOU 7167 HG12 VAL C 51 | 4240    | 5140   | 4140   | -450 | 360   | -200 | H0 |
| ATOM 7168 HG13 VAL C 51   | -47.833 | 9.418  | 30.611 | 1.00 | 35.17 | H0   |    |
| ANISOU 7168 HG13 VAL C 51 | 4170    | 5030   | 4170   | -340 | 390   | -210 | H0 |
| ATOM 7169 HG21 VAL C 51   | -46.027 | 8.543  | 32.450 | 1.00 | 34.76 | H0   |    |
| ANISOU 7169 HG21 VAL C 51 | 4260    | 4880   | 4060   | -390 | 330   | -320 | H0 |
| ATOM 7170 HG22 VAL C 51   | -47.259 | 7.792  | 33.113 | 1.00 | 35.24 | H0   |    |
| ANISOU 7170 HG22 VAL C 51 | 4340    | 5000   | 4050   | -490 | 310   | -290 | H0 |
| ATOM 7171 HG23 VAL C 51   | -46.406 | 8.825  | 33.966 | 1.00 | 35.11 | H0   |    |
| ANISOU 7171 HG23 VAL C 51 | 4310    | 4940   | 4090   | -440 | 370   | -360 | H0 |
| ATOM 7172 N PHE C 52      | -47.886 | 12.723 | 30.939 | 1.00 | 35.27 | N0   |    |
| ANISOU 7172 N PHE C 52    | 4070    | 4970   | 4360   | -190 | 580   | -230 | N0 |
| ATOM 7173 CA PHE C 52     | -48.732 | 13.863 | 30.512 | 1.00 | 36.01 | C0   |    |
| ANISOU 7173 CA PHE C 52   | 4100    | 5070   | 4510   | -100 | 640   | -200 | C0 |
| ATOM 7174 C PHE C 52      | -49.047 | 13.756 | 29.021 | 1.00 | 35.85 | C0   |    |
| ANISOU 7174 C PHE C 52    | 4050    | 5080   | 4490   | -80  | 600   | -110 | C0 |
| ATOM 7175 O PHE C 52      | -48.230 | 13.222 | 28.249 | 1.00 | 36.11 | O0   |    |
| ANISOU 7175 O PHE C 52    | 4120    | 5090   | 4500   | -110 | 550   | -100 | O0 |
| ATOM 7176 CB PHE C 52     | -48.031 | 15.184 | 30.839 | 1.00 | 36.84 | C0   |    |
| ANISOU 7176 CB PHE C 52   | 4230    | 5070   | 4690   | -50  | 690   | -240 | C0 |
| ATOM 7177 CG PHE C 52     | -46.677 | 15.340 | 30.199 | 1.00 | 36.47 | C0   |    |
| ANISOU 7177 CG PHE C 52   | 4240    | 4950   | 4660   | -80  | 680   | -240 | C0 |
| ATOM 7178 CD1 PHE C 52    | -45.555 | 14.750 | 30.757 | 1.00 | 36.13 | C0   |    |
| ANISOU 7178 CD1 PHE C 52  | 4240    | 4900   | 4590   | -130 | 650   | -300 | C0 |
| ATOM 7179 CD2 PHE C 52    | -46.531 | 16.051 | 29.018 | 1.00 | 37.33 | C0   |    |
| ANISOU 7179 CD2 PHE C 52  | 4350    | 5020   | 4810   | -40  | 680   | -170 | C0 |

|                          |         |        |        |      |       |      |    |
|--------------------------|---------|--------|--------|------|-------|------|----|
| ATOM 7180 CE1 PHE C 52   | -44.312 | 14.885 | 30.157 | 1.00 | 36.46 | C0   |    |
| ANISOU 7180 CE1 PHE C 52 | 4310    | 4910   | 4640   | -150 | 640   | -300 | C0 |
| ATOM 7181 CE2 PHE C 52   | -45.287 | 16.192 | 28.424 | 1.00 | 37.24 | C0   |    |
| ANISOU 7181 CE2 PHE C 52 | 4380    | 4970   | 4800   | -80  | 670   | -170 | C0 |
| ATOM 7182 CZ PHE C 52    | -44.179 | 15.605 | 28.992 | 1.00 | 36.83 | C0   |    |
| ANISOU 7182 CZ PHE C 52  | 4350    | 4930   | 4710   | -130 | 660   | -240 | C0 |
| ATOM 7183 H PHE C 52     | -47.370 | 12.393 | 30.264 | 1.00 | 35.00 | H0   |    |
| ANISOU 7183 H PHE C 52   | 4060    | 4930   | 4320   | -190 | 550   | -220 | H0 |
| ATOM 7184 HA PHE C 52    | -49.583 | 13.825 | 31.015 | 1.00 | 36.48 | H0   |    |
| ANISOU 7184 HA PHE C 52  | 4110    | 5190   | 4560   | -100 | 650   | -200 | H0 |
| ATOM 7185 HB2 PHE C 52   | -48.607 | 15.922 | 30.547 | 1.00 | 37.29 | H0   |    |
| ANISOU 7185 HB2 PHE C 52 | 4260    | 5110   | 4790   | 10   | 720   | -210 | H0 |
| ATOM 7186 HB3 PHE C 52   | -47.931 | 15.250 | 31.812 | 1.00 | 36.79 | H0   |    |
| ANISOU 7186 HB3 PHE C 52 | 4240    | 5060   | 4680   | -70  | 720   | -290 | H0 |
| ATOM 7187 HD1 PHE C 52   | -45.638 | 14.255 | 31.556 | 1.00 | 36.12 | H0   |    |
| ANISOU 7187 HD1 PHE C 52 | 4250    | 4920   | 4550   | -160 | 640   | -330 | H0 |
| ATOM 7188 HD2 PHE C 52   | -47.286 | 16.457 | 28.624 | 1.00 | 37.70 | H0   |    |
| ANISOU 7188 HD2 PHE C 52 | 4370    | 5070   | 4880   | 10   | 690   | -130 | H0 |
| ATOM 7189 HE1 PHE C 52   | -43.554 | 14.484 | 30.551 | 1.00 | 36.07 | H0   |    |
| ANISOU 7189 HE1 PHE C 52 | 4280    | 4860   | 4560   | -180 | 620   | -350 | H0 |
| ATOM 7190 HE2 PHE C 52   | -45.202 | 16.684 | 27.625 | 1.00 | 37.50 | H0   |    |
| ANISOU 7190 HE2 PHE C 52 | 4420    | 4980   | 4850   | -70  | 670   | -120 | H0 |
| ATOM 7191 HZ PHE C 52    | -43.333 | 15.698 | 28.585 | 1.00 | 36.71 | H0   |    |
| ANISOU 7191 HZ PHE C 52  | 4350    | 4910   | 4690   | -160 | 650   | -250 | H0 |
| ATOM 7192 N TRP C 53     | -50.210 | 14.263 | 28.629 | 1.00 | 36.18 | N0   |    |
| ANISOU 7192 N TRP C 53   | 4020    | 5170   | 4560   | -20  | 610   | -60  | N0 |
| ATOM 7193 CA TRP C 53    | -50.526 | 14.559 | 27.214 | 1.00 | 36.92 | C0   |    |
| ANISOU 7193 CA TRP C 53  | 4090    | 5280   | 4670   | 30   | 580   | 20   | C0 |
| ATOM 7194 C TRP C 53     | -49.818 | 15.861 | 26.840 | 1.00 | 37.98 | C0   |    |
| ANISOU 7194 C TRP C 53   | 4270    | 5290   | 4870   | 90   | 620   | 40   | C0 |
| ATOM 7195 O TRP C 53     | -50.079 | 16.879 | 27.503 | 1.00 | 39.05 | O0   |    |
| ANISOU 7195 O TRP C 53   | 4400    | 5370   | 5070   | 160  | 660   | 10   | O0 |
| ATOM 7196 CB TRP C 53    | -52.035 | 14.670 | 26.986 | 1.00 | 37.48 | C0   |    |
| ANISOU 7196 CB TRP C 53  | 4050    | 5460   | 4730   | 80   | 580   | 70   | C0 |
| ATOM 7197 CG TRP C 53    | -52.838 | 13.497 | 27.447 | 1.00 | 36.97 | C0   |    |
| ANISOU 7197 CG TRP C 53  | 3930    | 5520   | 4590   | -10  | 550   | 60   | C0 |
| ATOM 7198 CD1 TRP C 53   | -52.396 | 12.240 | 27.735 | 1.00 | 35.97 | C0   |    |
| ANISOU 7198 CD1 TRP C 53 | 3870    | 5410   | 4390   | -120 | 510   | 40   | C0 |
| ATOM 7199 CD2 TRP C 53   | -54.262 | 13.480 | 27.643 | 1.00 | 37.91 | C0   |    |
| ANISOU 7199 CD2 TRP C 53 | 3930    | 5780   | 4690   | 10   | 560   | 80   | C0 |
| ATOM 7200 NE1 TRP C 53   | -53.446 | 11.443 | 28.103 | 1.00 | 36.51 | N0   |    |
| ANISOU 7200 NE1 TRP C 53 | 3870    | 5610   | 4390   | -200 | 490   | 50   | N0 |
| ATOM 7201 CE2 TRP C 53   | -54.604 | 12.178 | 28.061 | 1.00 | 37.65 | C0   |    |
| ANISOU 7201 CE2 TRP C 53 | 3890    | 5850   | 4560   | -120 | 520   | 70   | C0 |
| ATOM 7202 CE3 TRP C 53   | -55.270 | 14.441 | 27.520 | 1.00 | 39.13 | C0   |    |
| ANISOU 7202 CE3 TRP C 53 | 3980    | 6000   | 4890   | 140  | 580   | 100  | C0 |
| ATOM 7203 CZ2 TRP C 53   | -55.916 | 11.818 | 28.362 | 1.00 | 38.61 | C0   |    |
| ANISOU 7203 CZ2 TRP C 53 | 3900    | 6140   | 4630   | -160 | 530   | 80   | C0 |
| ATOM 7204 CZ3 TRP C 53   | -56.566 | 14.083 | 27.812 | 1.00 | 40.51 | C0   |    |
| ANISOU 7204 CZ3 TRP C 53 | 4020    | 6350   | 5020   | 120  | 590   | 100  | C0 |
| ATOM 7205 CH2 TRP C 53   | -56.883 | 12.787 | 28.226 | 1.00 | 40.09 | C0   |    |
| ANISOU 7205 CH2 TRP C 53 | 3950    | 6410   | 4870   | -40  | 560   | 90   | C0 |
| ATOM 7206 H TRP C 53     | -50.883 | 14.472 | 29.207 | 1.00 | 36.83 | H0   |    |
| ANISOU 7206 H TRP C 53   | 4060    | 5290   | 4650   | 0    | 640   | -80  | H0 |



|                           |         |        |        |      |       |     |    |
|---------------------------|---------|--------|--------|------|-------|-----|----|
| ATOM 7207 HA TRP C 53     | -50.180 | 13.825 | 26.658 | 1.00 | 36.48 | H0  |    |
| ANISOU 7207 HA TRP C 53   | 4050    | 5240   | 4570   | -20  | 540   | 40  | H0 |
| ATOM 7208 HB2 TRP C 53    | -52.354 | 15.472 | 27.448 | 1.00 | 38.01 | H0  |    |
| ANISOU 7208 HB2 TRP C 53  | 4090    | 5500   | 4850   | 150  | 620   | 50  | H0 |
| ATOM 7209 HB3 TRP C 53    | -52.189 | 14.801 | 26.028 | 1.00 | 37.63 | H0  |    |
| ANISOU 7209 HB3 TRP C 53  | 4060    | 5480   | 4750   | 100  | 550   | 130 | H0 |
| ATOM 7210 HD1 TRP C 53    | -51.498 | 11.951 | 27.681 | 1.00 | 35.51 | H0  |    |
| ANISOU 7210 HD1 TRP C 53  | 3880    | 5280   | 4330   | -150 | 490   | 20  | H0 |
| ATOM 7211 HE1 TRP C 53    | -53.384 | 10.606 | 28.336 | 1.00 | 36.38 | H0  |    |
| ANISOU 7211 HE1 TRP C 53  | 3890    | 5610   | 4320   | -280 | 460   | 40  | H0 |
| ATOM 7212 HE3 TRP C 53    | -55.064 | 15.319 | 27.243 | 1.00 | 39.48 | H0  |    |
| ANISOU 7212 HE3 TRP C 53  | 4040    | 5960   | 5000   | 230  | 600   | 110 | H0 |
| ATOM 7213 HZ2 TRP C 53    | -56.131 | 10.944 | 28.638 | 1.00 | 38.69 | H0  |    |
| ANISOU 7213 HZ2 TRP C 53  | 3920    | 6210   | 4570   | -270 | 500   | 80  | H0 |
| ATOM 7214 HZ3 TRP C 53    | -57.255 | 14.723 | 27.729 | 1.00 | 41.23 | H0  |    |
| ANISOU 7214 HZ3 TRP C 53  | 4030    | 6490   | 5150   | 220  | 600   | 110 | H0 |
| ATOM 7215 HH2 TRP C 53    | -57.776 | 12.574 | 28.418 | 1.00 | 40.78 | H0  |    |
| ANISOU 7215 HH2 TRP C 53  | 3940    | 6630   | 4920   | -60  | 570   | 100 | H0 |
| ATOM 7216 N GLN C 54      | -48.933 | 15.825 | 25.847 | 1.00 | 38.24 | N0  |    |
| ANISOU 7216 N GLN C 54    | 4350    | 5290   | 4890   | 60   | 590   | 70  | N0 |
| ATOM 7217 CA GLN C 54     | -48.335 | 17.045 | 25.253 | 1.00 | 39.96 | C0  |    |
| ANISOU 7217 CA GLN C 54   | 4620    | 5400   | 5160   | 90   | 610   | 110 | C0 |
| ATOM 7218 C GLN C 54      | -49.262 | 17.507 | 24.121 | 1.00 | 41.42 | C0  |    |
| ANISOU 7218 C GLN C 54    | 4770    | 5610   | 5360   | 160  | 580   | 220 | C0 |
| ATOM 7219 O GLN C 54      | -48.989 | 17.174 | 22.956 | 1.00 | 41.35 | O0  |    |
| ANISOU 7219 O GLN C 54    | 4770    | 5640   | 5300   | 120  | 540   | 280 | O0 |
| ATOM 7220 CB GLN C 54     | -46.908 | 16.751 | 24.798 | 1.00 | 40.04 | C0  |    |
| ANISOU 7220 CB GLN C 54   | 4680    | 5390   | 5140   | 10   | 610   | 90  | C0 |
| ATOM 7221 CG GLN C 54     | -46.132 | 17.993 | 24.395 | 1.00 | 41.39 | C0  |    |
| ANISOU 7221 CG GLN C 54   | 4910    | 5460   | 5350   | 0    | 640   | 130 | C0 |
| ATOM 7222 CD GLN C 54     | -44.648 | 17.730 | 24.428 | 1.00 | 41.99 | C0  |    |
| ANISOU 7222 CD GLN C 54   | 5020    | 5540   | 5400   | -90  | 650   | 70  | C0 |
| ATOM 7223 OE1 GLN C 54    | -44.052 | 17.542 | 25.491 | 1.00 | 43.00 | O0  |    |
| ANISOU 7223 OE1 GLN C 54  | 5150    | 5650   | 5530   | -110 | 670   | -20 | O0 |
| ATOM 7224 NE2 GLN C 54    | -44.045 | 17.689 | 23.253 | 1.00 | 42.02 | N0  |    |
| ANISOU 7224 NE2 GLN C 54  | 5030    | 5590   | 5350   | -130 | 640   | 120 | N0 |
| ATOM 7225 H GLN C 54      | -48.642 | 15.047 | 25.471 | 1.00 | 37.93 | H0  |    |
| ANISOU 7225 H GLN C 54    | 4320    | 5290   | 4810   | 10   | 560   | 80  | H0 |
| ATOM 7226 HA GLN C 54     | -48.308 | 17.747 | 25.942 | 1.00 | 40.31 | H0  |    |
| ANISOU 7226 HA GLN C 54   | 4680    | 5380   | 5260   | 120  | 650   | 80  | H0 |
| ATOM 7227 HB2 GLN C 54    | -46.437 | 16.301 | 25.530 | 1.00 | 39.58 | H0  |    |
| ANISOU 7227 HB2 GLN C 54  | 4630    | 5340   | 5070   | -20  | 620   | 30  | H0 |
| ATOM 7228 HB3 GLN C 54    | -46.942 | 16.133 | 24.039 | 1.00 | 39.87 | H0  |    |
| ANISOU 7228 HB3 GLN C 54  | 4640    | 5430   | 5070   | -10  | 580   | 130 | H0 |
| ATOM 7229 HG2 GLN C 54    | -46.396 | 18.266 | 23.490 | 1.00 | 41.90 | H0  |    |
| ANISOU 7229 HG2 GLN C 54  | 4980    | 5530   | 5410   | 20   | 620   | 200 | H0 |
| ATOM 7230 HG3 GLN C 54    | -46.346 | 18.728 | 25.009 | 1.00 | 41.88 | H0  |    |
| ANISOU 7230 HG3 GLN C 54  | 5000    | 5450   | 5470   | 40   | 670   | 110 | H0 |
| ATOM 7231 HE21 GLN C 54   | -43.257 | 18.077 | 23.146 | 1.00 | 42.27 | H0  |    |
| ANISOU 7231 HE21 GLN C 54 | 5080    | 5600   | 5380   | -180 | 660   | 110 | H0 |
| ATOM 7232 HE22 GLN C 54   | -44.428 | 17.274 | 22.573 | 1.00 | 42.03 | H0  |    |
| ANISOU 7232 HE22 GLN C 54 | 5010    | 5640   | 5320   | -120 | 610   | 160 | H0 |
| ATOM 7233 N GLN C 55      | -50.335 | 18.226 | 24.468 | 1.00 | 42.75 | N0  |    |
| ANISOU 7233 N GLN C 55    | 4900    | 5770   | 5580   | 260  | 590   | 230 | N0 |

|                           |         |        |        |      |       |     |    |
|---------------------------|---------|--------|--------|------|-------|-----|----|
| ATOM 7234 CA GLN C 55     | -51.430 | 18.587 | 23.530 | 1.00 | 44.47 |     | C0 |
| ANISOU 7234 CA GLN C 55   | 5060    | 6030   | 5800   | 340  | 550   | 330 | C0 |
| ATOM 7235 C GLN C 55      | -50.934 | 19.674 | 22.571 | 1.00 | 44.90 |     | C0 |
| ANISOU 7235 C GLN C 55    | 5200    | 5970   | 5890   | 370  | 530   | 410 | C0 |
| ATOM 7236 O GLN C 55      | -50.816 | 20.840 | 22.999 | 1.00 | 45.91 |     | O0 |
| ANISOU 7236 O GLN C 55    | 5400    | 5960   | 6090   | 440  | 560   | 400 | O0 |
| ATOM 7237 CB GLN C 55     | -52.676 | 19.002 | 24.312 | 1.00 | 46.08 |     | C0 |
| ANISOU 7237 CB GLN C 55   | 5180    | 6280   | 6050   | 460  | 570   | 300 | C0 |
| ATOM 7238 CG GLN C 55     | -53.218 | 17.880 | 25.184 | 1.00 | 46.14 |     | C0 |
| ANISOU 7238 CG GLN C 55   | 5100    | 6430   | 6000   | 400  | 580   | 230 | C0 |
| ATOM 7239 CD GLN C 55     | -54.521 | 18.248 | 25.845 | 1.00 | 48.50 |     | C0 |
| ANISOU 7239 CD GLN C 55   | 5290    | 6810   | 6330   | 510  | 600   | 200 | C0 |
| ATOM 7240 OE1 GLN C 55    | -55.563 | 17.648 | 25.585 | 1.00 | 50.39 |     | O0 |
| ANISOU 7240 OE1 GLN C 55  | 5410    | 7210   | 6520   | 510  | 570   | 230 | O0 |
| ATOM 7241 NE2 GLN C 55    | -54.472 | 19.252 | 26.706 | 1.00 | 49.98 |     | N0 |
| ANISOU 7241 NE2 GLN C 55  | 5500    | 6910   | 6590   | 600  | 660   | 140 | N0 |
| ATOM 7242 H GLN C 55      | -50.452 | 18.548 | 25.312 | 1.00 | 43.00 |     | H0 |
| ANISOU 7242 H GLN C 55    | 4930    | 5770   | 5640   | 290  | 630   | 180 | H0 |
| ATOM 7243 HA GLN C 55     | -51.651 | 17.785 | 23.002 | 1.00 | 44.05 |     | H0 |
| ANISOU 7243 HA GLN C 55   | 4970    | 6070   | 5690   | 300  | 510   | 360 | H0 |
| ATOM 7244 HB2 GLN C 55    | -52.455 | 19.772 | 24.874 | 1.00 | 46.45 |     | H0 |
| ANISOU 7244 HB2 GLN C 55  | 5270    | 6230   | 6150   | 510  | 600   | 260 | H0 |
| ATOM 7245 HB3 GLN C 55    | -53.367 | 19.280 | 23.677 | 1.00 | 46.83 |     | H0 |
| ANISOU 7245 HB3 GLN C 55  | 5240    | 6410   | 6150   | 530  | 530   | 360 | H0 |
| ATOM 7246 HG2 GLN C 55    | -53.353 | 17.079 | 24.633 | 1.00 | 45.90 |     | H0 |
| ANISOU 7246 HG2 GLN C 55  | 5040    | 6480   | 5920   | 340  | 540   | 270 | H0 |
| ATOM 7247 HG3 GLN C 55    | -52.559 | 17.660 | 25.877 | 1.00 | 45.64 |     | H0 |
| ANISOU 7247 HG3 GLN C 55  | 5080    | 6330   | 5940   | 350  | 610   | 170 | H0 |
| ATOM 7248 HE21 GLN C 55   | -55.221 | 19.592 | 27.031 | 1.00 | 50.58 |     | H0 |
| ANISOU 7248 HE21 GLN C 55 | 5510    | 7030   | 6680   | 680  | 670   | 110 | H0 |
| ATOM 7249 HE22 GLN C 55   | -53.692 | 19.582 | 26.958 | 1.00 | 49.39 |     | H0 |
| ANISOU 7249 HE22 GLN C 55 | 5510    | 6720   | 6530   | 580  | 680   | 110 | H0 |
| ATOM 7250 N THR C 56      | -50.654 | 19.289 | 21.323 | 1.00 | 43.74 |     | N0 |
| ANISOU 7250 N THR C 56    | 5070    | 5870   | 5680   | 310  | 490   | 490 | N0 |
| ATOM 7251 CA THR C 56     | -50.071 | 20.163 | 20.272 | 1.00 | 44.39 |     | C0 |
| ANISOU 7251 CA THR C 56   | 5250    | 5860   | 5760   | 300  | 470   | 590 | C0 |
| ATOM 7252 C THR C 56      | -51.101 | 20.348 | 19.152 | 1.00 | 45.18 |     | C0 |
| ANISOU 7252 C THR C 56    | 5310    | 6020   | 5840   | 370  | 400   | 710 | C0 |
| ATOM 7253 O THR C 56      | -51.567 | 19.325 | 18.604 | 1.00 | 45.02 |     | O0 |
| ANISOU 7253 O THR C 56    | 5210    | 6150   | 5740   | 330  | 360   | 720 | O0 |
| ATOM 7254 CB THR C 56     | -48.744 | 19.588 | 19.766 | 1.00 | 43.40 |     | C0 |
| ANISOU 7254 CB THR C 56   | 5160    | 5760   | 5560   | 160  | 490   | 570 | C0 |
| ATOM 7255 OG1 THR C 56    | -48.029 | 19.060 | 20.883 | 1.00 | 43.48 |     | O0 |
| ANISOU 7255 OG1 THR C 56  | 5170    | 5770   | 5580   | 110  | 530   | 450 | O0 |
| ATOM 7256 CG2 THR C 56    | -47.890 | 20.622 | 19.073 | 1.00 | 44.56 |     | C0 |
| ANISOU 7256 CG2 THR C 56  | 5410    | 5810   | 5710   | 110  | 500   | 640 | C0 |
| ATOM 7257 H THR C 56      | -50.804 | 18.442 | 21.022 | 1.00 | 43.49 |     | H0 |
| ANISOU 7257 H THR C 56    | 5000    | 5930   | 5590   | 270  | 470   | 500 | H0 |
| ATOM 7258 HA THR C 56     | -49.890 | 21.039 | 20.676 | 1.00 | 44.88 |     | H0 |
| ANISOU 7258 HA THR C 56   | 5360    | 5810   | 5880   | 330  | 500   | 580 | H0 |
| ATOM 7259 HB THR C 56     | -48.940 | 18.857 | 19.133 | 1.00 | 43.44 |     | H0 |
| ANISOU 7259 HB THR C 56   | 5130    | 5870   | 5510   | 130  | 460   | 590 | H0 |
| ATOM 7260 HG21 THR C 56   | -48.364 | 20.970 | 18.297 | 1.00 | 45.18 |     | H0 |
| ANISOU 7260 HG21 THR C 56 | 5510    | 5890   | 5770   | 140  | 460   | 730 | H0 |

|        |      |      |     |   |    |         |        |        |      |       |      |    |
|--------|------|------|-----|---|----|---------|--------|--------|------|-------|------|----|
| ATOM   | 7261 | HG22 | THR | C | 56 | -47.054 | 20.213 | 18.785 | 1.00 | 43.98 | H0   |    |
| ANISOU | 7261 | HG22 | THR | C | 56 | 5350    | 5780   | 5580   | 20   | 510   | 620  | H0 |
| ATOM   | 7262 | HG23 | THR | C | 56 | -47.698 | 21.352 | 19.689 | 1.00 | 44.79 | H0   |    |
| ANISOU | 7262 | HG23 | THR | C | 56 | 5490    | 5730   | 5800   | 130  | 520   | 620  | H0 |
| ATOM   | 7263 | N    | THR | C | 57 | -51.438 | 21.604 | 18.847 | 1.00 | 45.82 | N0   |    |
| ANISOU | 7263 | N    | THR | C | 57 | 5450    | 5980   | 5970   | 460  | 380   | 780  | N0 |
| ATOM   | 7264 | CA   | THR | C | 57 | -52.430 | 22.019 | 17.822 | 1.00 | 47.30 | C0   |    |
| ANISOU | 7264 | CA   | THR | C | 57 | 5620    | 6200   | 6150   | 550  | 300   | 910  | C0 |
| ATOM   | 7265 | C    | THR | C | 57 | -51.816 | 23.102 | 16.920 | 1.00 | 47.76 | C0   |    |
| ANISOU | 7265 | C    | THR | C | 57 | 5830    | 6120   | 6210   | 530  | 270   | 1020 | C0 |
| ATOM   | 7266 | O    | THR | C | 57 | -51.187 | 24.033 | 17.455 | 1.00 | 47.51 | O0   |    |
| ANISOU | 7266 | O    | THR | C | 57 | 5900    | 5910   | 6240   | 530  | 300   | 1000 | O0 |
| ATOM   | 7267 | CB   | THR | C | 57 | -53.715 | 22.490 | 18.511 | 1.00 | 49.12 | C0   |    |
| ANISOU | 7267 | CB   | THR | C | 57 | 5770    | 6430   | 6460   | 730  | 280   | 890  | C0 |
| ATOM   | 7268 | OG1  | THR | C | 57 | -54.345 | 21.334 | 19.064 | 1.00 | 49.11 | O0   |    |
| ANISOU | 7268 | OG1  | THR | C | 57 | 5620    | 6610   | 6430   | 710  | 300   | 810  | O0 |
| ATOM   | 7269 | CG2  | THR | C | 57 | -54.664 | 23.224 | 17.591 | 1.00 | 51.23 | C0   |    |
| ANISOU | 7269 | CG2  | THR | C | 57 | 6030    | 6690   | 6740   | 870  | 190   | 1010 | C0 |
| ATOM   | 7270 | H    | THR | C | 57 | -51.066 | 22.322 | 19.267 | 1.00 | 46.38 | H0   |    |
| ANISOU | 7270 | H    | THR | C | 57 | 5590    | 5940   | 6090   | 480  | 400   | 770  | H0 |
| ATOM   | 7271 | HA   | THR | C | 57 | -52.642 | 21.234 | 17.269 | 1.00 | 46.88 | H0   |    |
| ANISOU | 7271 | HA   | THR | C | 57 | 5510    | 6270   | 6030   | 510  | 270   | 930  | H0 |
| ATOM   | 7272 | HB   | THR | C | 57 | -53.464 | 23.090 | 19.247 | 1.00 | 49.40 | H0   |    |
| ANISOU | 7272 | HB   | THR | C | 57 | 5850    | 6360   | 6560   | 770  | 320   | 830  | H0 |
| ATOM   | 7273 | HG21 | THR | C | 57 | -54.362 | 24.142 | 17.473 | 1.00 | 51.97 | H0   |    |
| ANISOU | 7273 | HG21 | THR | C | 57 | 6230    | 6640   | 6870   | 900  | 180   | 1050 | H0 |
| ATOM   | 7274 | HG22 | THR | C | 57 | -55.557 | 23.225 | 17.980 | 1.00 | 51.65 | H0   |    |
| ANISOU | 7274 | HG22 | THR | C | 57 | 5990    | 6810   | 6820   | 970  | 180   | 980  | H0 |
| ATOM   | 7275 | HG23 | THR | C | 57 | -54.689 | 22.778 | 16.725 | 1.00 | 51.01 | H0   |    |
| ANISOU | 7275 | HG23 | THR | C | 57 | 5990    | 6750   | 6640   | 810  | 150   | 1080 | H0 |
| ATOM   | 7276 | N    | TRP | C | 58 | -51.995 | 22.978 | 15.602 | 1.00 | 47.85 | N0   |    |
| ANISOU | 7276 | N    | TRP | C | 58 | 5840    | 6200   | 6140   | 500  | 200   | 1140 | N0 |
| ATOM   | 7277 | CA   | TRP | C | 58 | -51.592 | 23.993 | 14.592 | 1.00 | 49.01 | C0   |    |
| ANISOU | 7277 | CA   | TRP | C | 58 | 6130    | 6230   | 6260   | 470  | 160   | 1280 | C0 |
| ATOM   | 7278 | C    | TRP | C | 58 | -52.348 | 23.752 | 13.282 | 1.00 | 50.70 | C0   |    |
| ANISOU | 7278 | C    | TRP | C | 58 | 6310    | 6560   | 6390   | 490  | 70    | 1410 | C0 |
| ATOM   | 7279 | O    | TRP | C | 58 | -53.070 | 22.739 | 13.185 | 1.00 | 49.81 | O0   |    |
| ANISOU | 7279 | O    | TRP | C | 58 | 6060    | 6620   | 6240   | 510  | 40    | 1380 | O0 |
| ATOM   | 7280 | CB   | TRP | C | 58 | -50.078 | 23.963 | 14.365 | 1.00 | 47.59 | C0   |    |
| ANISOU | 7280 | CB   | TRP | C | 58 | 6050    | 6010   | 6020   | 280  | 220   | 1260 | C0 |
| ATOM   | 7281 | CG   | TRP | C | 58 | -49.616 | 22.736 | 13.644 | 1.00 | 45.99 | C0   |    |
| ANISOU | 7281 | CG   | TRP | C | 58 | 5770    | 6000   | 5700   | 150  | 230   | 1240 | C0 |
| ATOM   | 7282 | CD1  | TRP | C | 58 | -49.437 | 22.591 | 12.299 | 1.00 | 46.07 | C0   |    |
| ANISOU | 7282 | CD1  | TRP | C | 58 | 5810    | 6100   | 5600   | 70   | 190   | 1350 | C0 |
| ATOM   | 7283 | CD2  | TRP | C | 58 | -49.285 | 21.465 | 14.231 | 1.00 | 43.66 | C0   |    |
| ANISOU | 7283 | CD2  | TRP | C | 58 | 5380    | 5830   | 5380   | 100  | 280   | 1110 | C0 |
| ATOM   | 7284 | NE1  | TRP | C | 58 | -49.015 | 21.324 | 12.011 | 1.00 | 44.66 | N0   |    |
| ANISOU | 7284 | NE1  | TRP | C | 58 | 5550    | 6090   | 5330   | -20  | 220   | 1270 | N0 |
| ATOM   | 7285 | CE2  | TRP | C | 58 | -48.910 | 20.609 | 13.172 | 1.00 | 43.14 | C0   |    |
| ANISOU | 7285 | CE2  | TRP | C | 58 | 5290    | 5910   | 5190   | 0    | 270   | 1130 | C0 |
| ATOM   | 7286 | CE3  | TRP | C | 58 | -49.262 | 20.972 | 15.540 | 1.00 | 42.19 | C0   |    |
| ANISOU | 7286 | CE3  | TRP | C | 58 | 5130    | 5640   | 5260   | 130  | 330   | 970  | C0 |
| ATOM   | 7287 | CZ2  | TRP | C | 58 | -48.518 | 19.289 | 13.385 | 1.00 | 41.62 | C0   |    |
| ANISOU | 7287 | CZ2  | TRP | C | 58 | 5020    | 5840   | 4950   | -60  | 300   | 1010 | C0 |

|                          |         |        |        |      |       |      |
|--------------------------|---------|--------|--------|------|-------|------|
| ATOM 7288 CZ3 TRP C 58   | -48.876 | 19.667 | 15.750 | 1.00 | 41.01 | C0   |
| ANISOU 7288 CZ3 TRP C 58 | 4910    | 5610   | 5050   | 60   | 360   | 880  |
| ATOM 7289 CH2 TRP C 58   | -48.510 | 18.838 | 14.687 | 1.00 | 40.90 | C0   |
| ANISOU 7289 CH2 TRP C 58 | 4890    | 5730   | 4930   | -20  | 340   | 890  |
| ATOM 7290 H TRP C 58     | -52.383 | 22.242 | 15.230 | 1.00 | 47.54 | H0   |
| ANISOU 7290 H TRP C 58   | 5730    | 6290   | 6050   | 480  | 180   | 1150 |
| ATOM 7291 HA TRP C 58    | -51.833 | 24.883 | 14.941 | 1.00 | 50.02 | H0   |
| ANISOU 7291 HA TRP C 58  | 6320    | 6220   | 6460   | 560  | 140   | 1300 |
| ATOM 7292 HB2 TRP C 58   | -49.826 | 24.756 | 13.848 | 1.00 | 48.74 | H0   |
| ANISOU 7292 HB2 TRP C 58 | 6300    | 6060   | 6160   | 250  | 190   | 1350 |
| ATOM 7293 HB3 TRP C 58   | -49.632 | 24.015 | 15.234 | 1.00 | 47.07 | H0   |
| ANISOU 7293 HB3 TRP C 58 | 5990    | 5890   | 6010   | 260  | 270   | 1170 |
| ATOM 7294 HD1 TRP C 58   | -49.584 | 23.267 | 11.655 | 1.00 | 47.29 | H0   |
| ANISOU 7294 HD1 TRP C 58 | 6040    | 6200   | 5730   | 70   | 150   | 1450 |
| ATOM 7295 HE1 TRP C 58   | -48.838 | 21.022 | 11.209 | 1.00 | 44.91 | H0   |
| ANISOU 7295 HE1 TRP C 58 | 5590    | 6200   | 5280   | -80  | 200   | 1310 |
| ATOM 7296 HE3 TRP C 58   | -49.507 | 21.524 | 16.265 | 1.00 | 42.60 | H0   |
| ANISOU 7296 HE3 TRP C 58 | 5200    | 5600   | 5390   | 200  | 350   | 950  |
| ATOM 7297 HZ2 TRP C 58   | -48.274 | 18.731 | 12.670 | 1.00 | 41.70 | H0   |
| ANISOU 7297 HZ2 TRP C 58 | 5020    | 5950   | 4870   | -120 | 290   | 1020 |
| ATOM 7298 HZ3 TRP C 58   | -48.858 | 19.324 | 16.630 | 1.00 | 40.34 | H0   |
| ANISOU 7298 HZ3 TRP C 58 | 4800    | 5520   | 5010   | 80   | 380   | 790  |
| ATOM 7299 HH2 TRP C 58   | -48.251 | 17.951 | 14.862 | 1.00 | 40.00 | H0   |
| ANISOU 7299 HH2 TRP C 58 | 4740    | 5680   | 4780   | -60  | 350   | 820  |
| ATOM 7300 N SER C 59     | -52.172 | 24.652 | 12.313 | 1.00 | 53.33 | N0   |
| ANISOU 7300 N SER C 59   | 6770    | 6800   | 6690   | 470  | 10    | 1550 |
| ATOM 7301 CA SER C 59    | -52.765 | 24.558 | 10.955 | 1.00 | 55.63 | C0   |
| ANISOU 7301 CA SER C 59  | 7060    | 7190   | 6890   | 470  | -90   | 1690 |
| ATOM 7302 C SER C 59     | -51.652 | 24.413 | 9.912  | 1.00 | 55.90 | C0   |
| ANISOU 7302 C SER C 59   | 7180    | 7260   | 6800   | 270  | -70   | 1760 |
| ATOM 7303 O SER C 59     | -50.669 | 25.167 | 9.988  | 1.00 | 55.72 | O0   |
| ANISOU 7303 O SER C 59   | 7290    | 7100   | 6780   | 180  | -30   | 1780 |
| ATOM 7304 CB SER C 59    | -53.647 | 25.739 | 10.672 | 1.00 | 58.67 | C0   |
| ANISOU 7304 CB SER C 59  | 7510    | 7440   | 7340   | 640  | -190  | 1820 |
| ATOM 7305 OG SER C 59    | -54.847 | 25.649 | 11.428 | 1.00 | 59.87 | O0   |
| ANISOU 7305 OG SER C 59  | 7530    | 7640   | 7580   | 840  | -220  | 1750 |
| ATOM 7306 H SER C 59     | -51.668 | 25.403 | 12.418 | 1.00 | 53.92 | H0   |
| ANISOU 7306 H SER C 59   | 6950    | 6730   | 6800   | 450  | 20    | 1570 |
| ATOM 7307 HA SER C 59    | -53.326 | 23.738 | 10.922 | 1.00 | 54.99 | H0   |
| ANISOU 7307 HA SER C 59  | 6860    | 7250   | 6780   | 490  | -100  | 1660 |
| ATOM 7308 HB2 SER C 59   | -53.171 | 26.568 | 10.905 | 1.00 | 59.33 | H0   |
| ANISOU 7308 HB2 SER C 59 | 7720    | 7360   | 7470   | 640  | -180  | 1840 |
| ATOM 7309 HB3 SER C 59   | -53.863 | 25.767 | 9.712  | 1.00 | 59.50 | H0   |
| ANISOU 7309 HB3 SER C 59 | 7640    | 7600   | 7370   | 620  | -260  | 1920 |
| ATOM 7310 N ASP C 60     | -51.794 | 23.427 | 9.022  | 1.00 | 56.56 | N0   |
| ANISOU 7310 N ASP C 60   | 7190    | 7540   | 6760   | 200  | -90   | 1770 |
| ATOM 7311 CA ASP C 60    | -51.037 | 23.280 | 7.750  | 1.00 | 58.18 | C0   |
| ANISOU 7311 CA ASP C 60  | 7460    | 7830   | 6810   | 30   | -100  | 1850 |
| ATOM 7312 C ASP C 60     | -52.073 | 23.364 | 6.622  | 1.00 | 60.90 | C0   |
| ANISOU 7312 C ASP C 60   | 7790    | 8260   | 7090   | 90   | -220  | 2000 |
| ATOM 7313 O ASP C 60     | -52.571 | 22.308 | 6.192  | 1.00 | 60.27 | O0   |
| ANISOU 7313 O ASP C 60   | 7600    | 8370   | 6930   | 70   | -240  | 1970 |
| ATOM 7314 CB ASP C 60    | -50.216 | 21.985 | 7.754  | 1.00 | 56.32 | C0   |
| ANISOU 7314 CB ASP C 60  | 7140    | 7760   | 6490   | -100 | -20   | 1720 |

|                          |         |        |        |      |       |      |
|--------------------------|---------|--------|--------|------|-------|------|
| ATOM 7315 CG ASP C 60    | -49.263 | 21.809 | 6.579  | 1.00 | 56.93 | C0   |
| ANISOU 7315 CG ASP C 60  | 7280    | 7940   | 6410   | -280 | 10    | 1760 |
| ATOM 7316 OD1 ASP C 60   | -49.455 | 22.495 | 5.545  | 1.00 | 57.70 | O0   |
| ANISOU 7316 OD1 ASP C 60 | 7460    | 8030   | 6430   | -310 | -60   | 1920 |
| ATOM 7317 OD2 ASP C 60   | -48.328 | 20.978 | 6.707  | 1.00 | 55.02 | O0   |
| ANISOU 7317 OD2 ASP C 60 | 6990    | 7800   | 6120   | -380 | 90    | 1640 |
| ATOM 7318 H ASP C 60     | -52.392 | 22.751 | 9.151  | 1.00 | 56.02 | H0   |
| ANISOU 7318 H ASP C 60   | 7020    | 7580   | 6690   | 240  | -110  | 1730 |
| ATOM 7319 HA ASP C 60    | -50.416 | 24.042 | 7.666  | 1.00 | 58.85 | H0   |
| ANISOU 7319 HA ASP C 60  | 7650    | 7810   | 6900   | -30  | -80   | 1900 |
| ATOM 7320 HB2 ASP C 60   | -49.686 | 21.956 | 8.577  | 1.00 | 55.57 | H0   |
| ANISOU 7320 HB2 ASP C 60 | 7050    | 7610   | 6460   | -110 | 50    | 1630 |
| ATOM 7321 HB3 ASP C 60   | -50.829 | 21.223 | 7.765  | 1.00 | 55.87 | H0   |
| ANISOU 7321 HB3 ASP C 60 | 7000    | 7810   | 6430   | -60  | -40   | 1680 |
| ATOM 7322 N ARG C 61     | -52.401 | 24.584 | 6.183  | 1.00 | 64.81 | N0   |
| ANISOU 7322 N ARG C 61   | 8410    | 8610   | 7600   | 150  | -300  | 2160 |
| ATOM 7323 CA ARG C 61    | -53.568 | 24.871 | 5.302  | 1.00 | 68.06 | C0   |
| ANISOU 7323 CA ARG C 61  | 8820    | 9070   | 7980   | 260  | -440  | 2300 |
| ATOM 7324 C ARG C 61     | -53.290 | 24.395 | 3.869  | 1.00 | 68.03 | C0   |
| ANISOU 7324 C ARG C 61   | 8840    | 9230   | 7780   | 100  | -470  | 2400 |
| ATOM 7325 O ARG C 61     | -54.157 | 24.618 | 3.008  | 1.00 | 68.74 | O0   |
| ANISOU 7325 O ARG C 61   | 8930    | 9370   | 7820   | 170  | -600  | 2530 |
| ATOM 7326 CB ARG C 61    | -53.927 | 26.360 | 5.372  | 1.00 | 71.68 | C0   |
| ANISOU 7326 CB ARG C 61  | 9420    | 9290   | 8520   | 390  | -520  | 2430 |
| ATOM 7327 CG ARG C 61    | -54.203 | 26.845 | 6.789  | 1.00 | 72.74 | C0   |
| ANISOU 7327 CG ARG C 61  | 9530    | 9270   | 8840   | 550  | -480  | 2330 |
| ATOM 7328 CD ARG C 61    | -54.949 | 28.164 | 6.873  | 1.00 | 76.30 | C0   |
| ANISOU 7328 CD ARG C 61  | 10090   | 9510   | 9390   | 760  | -590  | 2430 |
| ATOM 7329 NE ARG C 61    | -55.127 | 28.569 | 8.266  | 1.00 | 77.07 | N0   |
| ANISOU 7329 NE ARG C 61  | 10170   | 9470   | 9650   | 900  | -540  | 2300 |
| ATOM 7330 CZ ARG C 61    | -56.036 | 29.439 | 8.711  | 1.00 | 79.48 | C0   |
| ANISOU 7330 CZ ARG C 61  | 10490   | 9630   | 10070  | 1150 | -620  | 2320 |
| ATOM 7331 NH1 ARG C 61   | -56.879 | 30.026 | 7.875  | 1.00 | 81.57 | N0   |
| ANISOU 7331 NH1 ARG C 61 | 10800   | 9870   | 10320  | 1280 | -770  | 2470 |
| ATOM 7332 NH2 ARG C 61   | -56.095 | 29.720 | 10.004 | 1.00 | 79.43 | N0   |
| ANISOU 7332 NH2 ARG C 61 | 10460   | 9520   | 10190  | 1260 | -550  | 2180 |
| ATOM 7333 H ARG C 61     | -51.911 | 25.322 | 6.392  | 1.00 | 65.22 | H0   |
| ANISOU 7333 H ARG C 61   | 8570    | 8520   | 7690   | 130  | -280  | 2180 |
| ATOM 7334 HA ARG C 61    | -54.334 | 24.357 | 5.647  | 1.00 | 67.46 | H0   |
| ANISOU 7334 HA ARG C 61  | 8610    | 9080   | 7940   | 360  | -460  | 2250 |
| ATOM 7335 HB2 ARG C 61   | -53.187 | 26.880 | 4.995  | 1.00 | 72.25 | H0   |
| ANISOU 7335 HB2 ARG C 61 | 9620    | 9280   | 8550   | 280  | -510  | 2500 |
| ATOM 7336 HB3 ARG C 61   | -54.722 | 26.518 | 4.821  | 1.00 | 72.77 | H0   |
| ANISOU 7336 HB3 ARG C 61 | 9540    | 9470   | 8640   | 480  | -620  | 2530 |
| ATOM 7337 HG2 ARG C 61   | -54.726 | 26.162 | 7.260  | 1.00 | 71.75 | H0   |
| ANISOU 7337 HG2 ARG C 61 | 9260    | 9250   | 8740   | 620  | -470  | 2230 |
| ATOM 7338 HG3 ARG C 61   | -53.350 | 26.940 | 7.262  | 1.00 | 71.99 | H0   |
| ANISOU 7338 HG3 ARG C 61 | 9490    | 9100   | 8760   | 460  | -400  | 2260 |
| ATOM 7339 HD2 ARG C 61   | -54.448 | 28.856 | 6.392  | 1.00 | 77.33 | H0   |
| ANISOU 7339 HD2 ARG C 61 | 10380   | 9520   | 9480   | 680  | -620  | 2540 |
| ATOM 7340 HD3 ARG C 61   | -55.826 | 28.067 | 6.444  | 1.00 | 77.05 | H0   |
| ANISOU 7340 HD3 ARG C 61 | 10120   | 9690   | 9470   | 860  | -680  | 2490 |
| ATOM 7341 HE ARG C 61    | -54.596 | 28.211 | 8.858  | 1.00 | 75.71 | H0   |
| ANISOU 7341 HE ARG C 61  | 9970    | 9310   | 9490   | 830  | -450  | 2200 |

|        |      |      |     |   |    |         |        |        |      |       |      |    |
|--------|------|------|-----|---|----|---------|--------|--------|------|-------|------|----|
| ATOM   | 7342 | HH11 | ARG | C | 61 | -56.849 | 29.848 | 7.016  | 1.00 | 81.90 | H0   |    |
| ANISOU | 7342 | HH11 | ARG | C | 61 | 10860   | 9990   | 10270  | 1210 | -810  | 2570 | H0 |
| ATOM   | 7343 | HH12 | ARG | C | 61 | -57.472 | 30.598 | 8.183  | 1.00 | 82.74 | H0   |    |
| ANISOU | 7343 | HH12 | ARG | C | 61 | 10960   | 9930   | 10550  | 1460 | -820  | 2480 | H0 |
| ATOM   | 7344 | HH21 | ARG | C | 61 | -55.536 | 29.333 | 10.564 | 1.00 | 77.86 | H0   |    |
| ANISOU | 7344 | HH21 | ARG | C | 61 | 10240   | 9340   | 10000  | 1170 | -460  | 2080 | H0 |
| ATOM   | 7345 | HH22 | ARG | C | 61 | -56.693 | 30.295 | 10.302 | 1.00 | 80.42 | H0   |    |
| ANISOU | 7345 | HH22 | ARG | C | 61 | 10600   | 9560   | 10400  | 1430 | -600  | 2180 | H0 |
| ATOM   | 7346 | N    | THR | C | 62 | -52.147 | 23.736 | 3.636  | 1.00 | 67.22 | N0   |    |
| ANISOU | 7346 | N    | THR | C | 62 | 8740    | 9220   | 7580   | -90  | -370  | 2320 | N0 |
| ATOM   | 7347 | CA   | THR | C | 62 | -51.828 | 22.991 | 2.387  | 1.00 | 68.12 | C0   |    |
| ANISOU | 7347 | CA   | THR | C | 62 | 8840    | 9540   | 7510   | -240 | -380  | 2350 | C0 |
| ATOM   | 7348 | C    | THR | C | 62 | -52.555 | 21.639 | 2.397  | 1.00 | 66.57 | C0   |    |
| ANISOU | 7348 | C    | THR | C | 62 | 8480    | 9530   | 7280   | -200 | -400  | 2240 | C0 |
| ATOM   | 7349 | O    | THR | C | 62 | -52.912 | 21.158 | 1.303  | 1.00 | 67.98 | O0   |    |
| ANISOU | 7349 | O    | THR | C | 62 | 8640    | 9870   | 7320   | -260 | -460  | 2300 | O0 |
| ATOM   | 7350 | CB   | THR | C | 62 | -50.318 | 22.783 | 2.210  | 1.00 | 68.02 | C0   |    |
| ANISOU | 7350 | CB   | THR | C | 62 | 8880    | 9560   | 7400   | -440 | -260  | 2280 | C0 |
| ATOM   | 7351 | OG1  | THR | C | 62 | -49.884 | 21.780 | 3.129  | 1.00 | 66.81 | O0   |    |
| ANISOU | 7351 | OG1  | THR | C | 62 | 8620    | 9470   | 7300   | -440 | -160  | 2080 | O0 |
| ATOM   | 7352 | CG2  | THR | C | 62 | -49.513 | 24.047 | 2.416  | 1.00 | 69.35 | C0   |    |
| ANISOU | 7352 | CG2  | THR | C | 62 | 9200    | 9540   | 7610   | -510 | -230  | 2360 | C0 |
| ATOM   | 7353 | H    | THR | C | 62 | -51.466 | 23.704 | 4.235  | 1.00 | 66.46 | H0   |    |
| ANISOU | 7353 | H    | THR | C | 62 | 8650    | 9070   | 7530   | -130 | -290  | 2230 | H0 |
| ATOM   | 7354 | HA   | THR | C | 62 | -52.162 | 23.519 | 1.625  | 1.00 | 69.47 | H0   |    |
| ANISOU | 7354 | HA   | THR | C | 62 | 9080    | 9700   | 7620   | -240 | -460  | 2490 | H0 |
| ATOM   | 7355 | HB   | THR | C | 62 | -50.160 | 22.458 | 1.291  | 1.00 | 68.66 | H0   |    |
| ANISOU | 7355 | HB   | THR | C | 62 | 8970    | 9770   | 7350   | -530 | -280  | 2320 | H0 |
| ATOM   | 7356 | HG21 | THR | C | 62 | -49.960 | 24.793 | 1.978  | 1.00 | 70.70 | H0   |    |
| ANISOU | 7356 | HG21 | THR | C | 62 | 9460    | 9630   | 7770   | -470 | -310  | 2500 | H0 |
| ATOM   | 7357 | HG22 | THR | C | 62 | -48.624 | 23.933 | 2.034  | 1.00 | 69.29 | H0   |    |
| ANISOU | 7357 | HG22 | THR | C | 62 | 9220    | 9600   | 7500   | -650 | -170  | 2340 | H0 |
| ATOM   | 7358 | HG23 | THR | C | 62 | -49.433 | 24.232 | 3.369  | 1.00 | 68.54 | H0   |    |
| ANISOU | 7358 | HG23 | THR | C | 62 | 9090    | 9330   | 7620   | -440 | -190  | 2290 | H0 |
| ATOM   | 7359 | N    | LEU | C | 63 | -52.767 | 21.064 | 3.587  | 1.00 | 63.98 | N0   |    |
| ANISOU | 7359 | N    | LEU | C | 63 | 8050    | 9190   | 7070   | -120 | -350  | 2090 | N0 |
| ATOM   | 7360 | CA   | LEU | C | 63 | -53.441 | 19.752 | 3.794  | 1.00 | 62.36 | C0   |    |
| ANISOU | 7360 | CA   | LEU | C | 63 | 7700    | 9150   | 6850   | -100 | -360  | 1980 | C0 |
| ATOM   | 7361 | C    | LEU | C | 63 | -54.946 | 19.878 | 3.525  | 1.00 | 62.34 | C0   |    |
| ANISOU | 7361 | C    | LEU | C | 63 | 7610    | 9200   | 6870   | 30   | -480  | 2070 | C0 |
| ATOM   | 7362 | O    | LEU | C | 63 | -55.566 | 18.848 | 3.202  | 1.00 | 62.22 | O0   |    |
| ANISOU | 7362 | O    | LEU | C | 63 | 7500    | 9360   | 6780   | 10   | -520  | 2030 | O0 |
| ATOM   | 7363 | CB   | LEU | C | 63 | -53.201 | 19.274 | 5.231  | 1.00 | 60.91 | C0   |    |
| ANISOU | 7363 | CB   | LEU | C | 63 | 7450    | 8900   | 6790   | -60  | -270  | 1810 | C0 |
| ATOM   | 7364 | CG   | LEU | C | 63 | -51.742 | 19.102 | 5.650  | 1.00 | 60.05 | C0   |    |
| ANISOU | 7364 | CG   | LEU | C | 63 | 7390    | 8740   | 6680   | -160 | -150  | 1700 | C0 |
| ATOM   | 7365 | CD1  | LEU | C | 63 | -51.648 | 18.615 | 7.086  | 1.00 | 58.63 | C0   |    |
| ANISOU | 7365 | CD1  | LEU | C | 63 | 7150    | 8510   | 6620   | -110 | -80   | 1550 | C0 |
| ATOM   | 7366 | CD2  | LEU | C | 63 | -51.014 | 18.144 | 4.723  | 1.00 | 60.29 | C0   |    |
| ANISOU | 7366 | CD2  | LEU | C | 63 | 7430    | 8930   | 6550   | -310 | -120  | 1650 | C0 |
| ATOM   | 7367 | H    | LEU | C | 63 | -52.509 | 21.459 | 4.365  | 1.00 | 63.70 | H0   |    |
| ANISOU | 7367 | H    | LEU | C | 63 | 8030    | 9040   | 7130   | -80  | -300  | 2050 | H0 |
| ATOM   | 7368 | HA   | LEU | C | 63 | -53.060 | 19.101 | 3.160  | 1.00 | 62.09 | H0   |    |
| ANISOU | 7368 | HA   | LEU | C | 63 | 7660    | 9220   | 6710   | -200 | -340  | 1950 | H0 |

|                           |         |        |       |      |       |      |    |
|---------------------------|---------|--------|-------|------|-------|------|----|
| ATOM 7369 HB2 LEU C 63    | -53.623 | 19.913 | 5.839 | 1.00 | 61.18 | H0   |    |
| ANISOU 7369 HB2 LEU C 63  | 7480    | 8840   | 6930  | 50   | -280  | 1830 | H0 |
| ATOM 7370 HB3 LEU C 63    | -53.656 | 18.416 | 5.346 | 1.00 | 60.30 | H0   |    |
| ANISOU 7370 HB3 LEU C 63  | 7290    | 8930   | 6700  | -50  | -280  | 1750 | H0 |
| ATOM 7371 HG LEU C 63     | -51.297 | 19.983 | 5.594 | 1.00 | 60.76 | H0   |    |
| ANISOU 7371 HG LEU C 63   | 7570    | 8730   | 6790  | -180 | -130  | 1770 | H0 |
| ATOM 7372 HD11 LEU C 63   | -52.130 | 19.227 | 7.669 | 1.00 | 58.84 | H0   |    |
| ANISOU 7372 HD11 LEU C 63 | 7170    | 8450   | 6740  | -20  | -100  | 1580 | H0 |
| ATOM 7373 HD12 LEU C 63   | -50.714 | 18.578 | 7.356 | 1.00 | 58.00 | H0   |    |
| ANISOU 7373 HD12 LEU C 63 | 7100    | 8400   | 6540  | -170 | -10   | 1490 | H0 |
| ATOM 7374 HD13 LEU C 63   | -52.041 | 17.727 | 7.154 | 1.00 | 57.99 | H0   |    |
| ANISOU 7374 HD13 LEU C 63 | 7000    | 8520   | 6510  | -110 | -100  | 1490 | H0 |
| ATOM 7375 HD21 LEU C 63   | -51.554 | 17.345 | 4.592 | 1.00 | 59.79 | H0   |    |
| ANISOU 7375 HD21 LEU C 63 | 7300    | 8960   | 6450  | -300 | -160  | 1610 | H0 |
| ATOM 7376 HD22 LEU C 63   | -50.161 | 17.897 | 5.120 | 1.00 | 59.32 | H0   |    |
| ANISOU 7376 HD22 LEU C 63 | 7310    | 8790   | 6430  | -360 | -50   | 1560 | H0 |
| ATOM 7377 HD23 LEU C 63   | -50.859 | 18.574 | 3.865 | 1.00 | 61.16 | H0   |    |
| ANISOU 7377 HD23 LEU C 63 | 7600    | 9060   | 6580  | -360 | -150  | 1750 | H0 |
| ATOM 7378 N ALA C 64      | -55.503 | 21.086 | 3.668 | 1.00 | 62.44 | N0   |    |
| ANISOU 7378 N ALA C 64    | 7670    | 9080   | 6970  | 170  | -550  | 2190 | N0 |
| ATOM 7379 CA ALA C 64     | -56.957 | 21.366 | 3.666 | 1.00 | 62.84 | C0   |    |
| ANISOU 7379 CA ALA C 64   | 7620    | 9180   | 7080  | 340  | -660  | 2260 | C0 |
| ATOM 7380 C ALA C 64      | -57.602 | 20.844 | 2.376 | 1.00 | 63.73 | C0   |    |
| ANISOU 7380 C ALA C 64    | 7690    | 9490   | 7040  | 290  | -770  | 2350 | C0 |
| ATOM 7381 O ALA C 64      | -57.020 | 21.048 | 1.293 | 1.00 | 64.76 | O0   |    |
| ANISOU 7381 O ALA C 64    | 7940    | 9630   | 7040  | 170  | -790  | 2450 | O0 |
| ATOM 7382 CB ALA C 64     | -57.199 | 22.847 | 3.840 | 1.00 | 64.15 | C0   |    |
| ANISOU 7382 CB ALA C 64   | 7890    | 9150   | 7340  | 490  | -720  | 2380 | C0 |
| ATOM 7383 H ALA C 64      | -55.012 | 21.843 | 3.787 | 1.00 | 62.94 | H0   |    |
| ANISOU 7383 H ALA C 64    | 7830    | 9020   | 7070  | 170  | -520  | 2230 | H0 |
| ATOM 7384 HA ALA C 64     | -57.360 | 20.891 | 4.428 | 1.00 | 62.05 | H0   |    |
| ANISOU 7384 HA ALA C 64   | 7420    | 9120   | 7040  | 390  | -630  | 2160 | H0 |
| ATOM 7385 HB1 ALA C 64    | -58.155 | 23.023 | 3.836 | 1.00 | 65.18 | H0   |    |
| ANISOU 7385 HB1 ALA C 64  | 7940    | 9310   | 7510  | 620  | -800  | 2420 | H0 |
| ATOM 7386 HB2 ALA C 64    | -56.820 | 23.141 | 4.686 | 1.00 | 63.61 | H0   |    |
| ANISOU 7386 HB2 ALA C 64  | 7840    | 8960   | 7370  | 520  | -650  | 2310 | H0 |
| ATOM 7387 HB3 ALA C 64    | -56.778 | 23.333 | 3.112 | 1.00 | 65.14 | H0   |    |
| ANISOU 7387 HB3 ALA C 64  | 8130    | 9220   | 7400  | 430  | -750  | 2480 | H0 |
| ATOM 7388 N TRP C 65      | -58.768 | 20.205 | 2.509 | 1.00 | 63.22 | N0   |    |
| ANISOU 7388 N TRP C 65    | 7460    | 9580   | 6980  | 360  | -830  | 2320 | N0 |
| ATOM 7389 CA TRP C 65     | -59.598 | 19.670 | 1.398 | 1.00 | 64.02 | C0   |    |
| ANISOU 7389 CA TRP C 65   | 7490    | 9890   | 6940  | 330  | -950  | 2400 | C0 |
| ATOM 7390 C TRP C 65      | -61.061 | 20.087 | 1.604 | 1.00 | 66.43 | C0   |    |
| ANISOU 7390 C TRP C 65    | 7660    | 10260  | 7330  | 520  | -1070 | 2460 | C0 |
| ATOM 7391 O TRP C 65      | -61.399 | 20.548 | 2.716 | 1.00 | 65.91 | O0   |    |
| ANISOU 7391 O TRP C 65    | 7530    | 10100  | 7410  | 670  | -1030 | 2410 | O0 |
| ATOM 7392 CB TRP C 65     | -59.444 | 18.144 | 1.303 | 1.00 | 61.86 | C0   |    |
| ANISOU 7392 CB TRP C 65   | 7150    | 9780   | 6570  | 170  | -910  | 2270 | C0 |
| ATOM 7393 CG TRP C 65     | -60.109 | 17.371 | 2.403 | 1.00 | 60.08 | C0   |    |
| ANISOU 7393 CG TRP C 65   | 6770    | 9620   | 6430  | 210  | -870  | 2130 | C0 |
| ATOM 7394 CD1 TRP C 65    | -61.362 | 16.836 | 2.372 | 1.00 | 60.34 | C0   |    |
| ANISOU 7394 CD1 TRP C 65  | 6640    | 9840   | 6450  | 240  | -960  | 2130 | C0 |
| ATOM 7395 CD2 TRP C 65    | -59.560 | 17.020 | 3.688 | 1.00 | 57.75 | C0   |    |
| ANISOU 7395 CD2 TRP C 65  | 6460    | 9230   | 6240  | 200  | -750  | 1980 | C0 |

|                          |         |        |        |      |       |      |    |
|--------------------------|---------|--------|--------|------|-------|------|----|
| ATOM 7396 NE1 TRP C 65   | -61.637 | 16.188 | 3.544  | 1.00 | 59.09 | N0   |    |
| ANISOU 7396 NE1 TRP C 65 | 6380    | 9700   | 6370   | 240  | -890  | 2000 | N0 |
| ATOM 7397 CE2 TRP C 65   | -60.550 | 16.280 | 4.373  | 1.00 | 57.42 | C0   |    |
| ANISOU 7397 CE2 TRP C 65 | 6260    | 9320   | 6240   | 220  | -770  | 1900 | C0 |
| ATOM 7398 CE3 TRP C 65   | -58.339 | 17.254 | 4.332  | 1.00 | 56.28 | C0   |    |
| ANISOU 7398 CE3 TRP C 65 | 6380    | 8880   | 6120   | 170  | -630  | 1910 | C0 |
| ATOM 7399 CZ2 TRP C 65   | -60.354 | 15.781 | 5.661  | 1.00 | 55.64 | C0   |    |
| ANISOU 7399 CZ2 TRP C 65 | 5990    | 9050   | 6100   | 210  | -670  | 1760 | C0 |
| ATOM 7400 CZ3 TRP C 65   | -58.146 | 16.761 | 5.606  | 1.00 | 54.45 | C0   |    |
| ANISOU 7400 CZ3 TRP C 65 | 6100    | 8600   | 5980   | 170  | -540  | 1760 | C0 |
| ATOM 7401 CH2 TRP C 65   | -59.142 | 16.037 | 6.261  | 1.00 | 54.17 | C0   |    |
| ANISOU 7401 CH2 TRP C 65 | 5920    | 8690   | 5970   | 190  | -570  | 1700 | C0 |
| ATOM 7402 H TRP C 65     | -59.143 | 20.049 | 3.324  | 1.00 | 62.75 | H0   |    |
| ANISOU 7402 H TRP C 65   | 7320    | 9520   | 7010   | 430  | -810  | 2250 | H0 |
| ATOM 7403 HA TRP C 65    | -59.272 | 20.062 | 0.554  | 1.00 | 65.01 | H0   |    |
| ANISOU 7403 HA TRP C 65  | 7720    | 9990   | 6990   | 280  | -990  | 2500 | H0 |
| ATOM 7404 HB2 TRP C 65   | -59.811 | 17.853 | 0.444  | 1.00 | 62.67 | H0   |    |
| ANISOU 7404 HB2 TRP C 65 | 7240    | 10010  | 6570   | 120  | -980  | 2320 | H0 |
| ATOM 7405 HB3 TRP C 65   | -58.487 | 17.935 | 1.303  | 1.00 | 60.94 | H0   |    |
| ANISOU 7405 HB3 TRP C 65 | 7110    | 9610   | 6430   | 70   | -830  | 2210 | H0 |
| ATOM 7406 HD1 TRP C 65   | -61.963 | 16.903 | 1.648  | 1.00 | 61.61 | H0   |    |
| ANISOU 7406 HD1 TRP C 65 | 6770    | 10100  | 6540   | 250  | -1050 | 2220 | H0 |
| ATOM 7407 HE1 TRP C 65   | -62.387 | 15.779 | 3.730  | 1.00 | 59.35 | H0   |    |
| ANISOU 7407 HE1 TRP C 65 | 6300    | 9850   | 6400   | 250  | -930  | 1980 | H0 |
| ATOM 7408 HE3 TRP C 65   | -57.660 | 17.744 | 3.900  | 1.00 | 56.51 | H0   |    |
| ANISOU 7408 HE3 TRP C 65 | 6520    | 8840   | 6120   | 140  | -620  | 1960 | H0 |
| ATOM 7409 HZ2 TRP C 65   | -61.028 | 15.292 | 6.102  | 1.00 | 55.67 | H0   |    |
| ANISOU 7409 HZ2 TRP C 65 | 5890    | 9140   | 6120   | 210  | -690  | 1720 | H0 |
| ATOM 7410 HZ3 TRP C 65   | -57.324 | 16.918 | 6.045  | 1.00 | 53.76 | H0   |    |
| ANISOU 7410 HZ3 TRP C 65 | 6080    | 8410   | 5930   | 150  | -470  | 1710 | H0 |
| ATOM 7411 HH2 TRP C 65   | -58.981 | 15.711 | 7.129  | 1.00 | 53.35 | H0   |    |
| ANISOU 7411 HH2 TRP C 65 | 5800    | 8550   | 5920   | 190  | -510  | 1600 | H0 |
| ATOM 7412 N ASN C 66     | -61.886 | 19.942 | 0.563  | 1.00 | 68.78 | N0   |    |
| ANISOU 7412 N ASN C 66   | 7900    | 10720  | 7510   | 520  | -1200 | 2570 | N0 |
| ATOM 7413 CA ASN C 66    | -63.352 | 20.193 | 0.597  | 1.00 | 71.25 | C0   |    |
| ANISOU 7413 CA ASN C 66  | 8040    | 11160  | 7870   | 700  | -1330 | 2630 | C0 |
| ATOM 7414 C ASN C 66     | -64.041 | 18.924 | 1.114  | 1.00 | 70.34 | C0   |    |
| ANISOU 7414 C ASN C 66   | 7730    | 11250  | 7740   | 630  | -1300 | 2490 | C0 |
| ATOM 7415 O ASN C 66     | -63.900 | 17.880 | 0.453  | 1.00 | 69.60 | O0   |    |
| ANISOU 7415 O ASN C 66   | 7640    | 11300  | 7510   | 450  | -1310 | 2460 | O0 |
| ATOM 7416 CB ASN C 66    | -63.869 | 20.616 | -0.781 | 1.00 | 74.16 | C0   |    |
| ANISOU 7416 CB ASN C 66  | 8450    | 11610  | 8120   | 710  | -1490 | 2820 | C0 |
| ATOM 7417 CG ASN C 66    | -65.341 | 20.970 | -0.795 | 1.00 | 77.21 | C0   |    |
| ANISOU 7417 CG ASN C 66  | 8660    | 12130  | 8550   | 920  | -1630 | 2880 | C0 |
| ATOM 7418 OD1 ASN C 66   | -66.101 | 20.540 | 0.072  | 1.00 | 76.18 | O0   |    |
| ANISOU 7418 OD1 ASN C 66 | 8330    | 12110  | 8500   | 990  | -1610 | 2780 | O0 |
| ATOM 7419 ND2 ASN C 66   | -65.746 | 21.750 | -1.786 | 1.00 | 81.07 | N0   |    |
| ANISOU 7419 ND2 ASN C 66 | 9200    | 12620  | 8970   | 1000 | -1780 | 3070 | N0 |
| ATOM 7420 H ASN C 66     | -61.587 | 19.671 | -0.254 | 1.00 | 68.97 | H0   |    |
| ANISOU 7420 H ASN C 66   | 7980    | 10800  | 7420   | 410  | -1220 | 2610 | H0 |
| ATOM 7421 HA ASN C 66    | -63.528 | 20.930 | 1.225  | 1.00 | 71.68 | H0   |    |
| ANISOU 7421 HA ASN C 66  | 8090    | 11100  | 8040   | 840  | -1320 | 2640 | H0 |
| ATOM 7422 HB2 ASN C 66   | -63.354 | 21.391 | -1.085 | 1.00 | 74.84 | H0   |    |
| ANISOU 7422 HB2 ASN C 66 | 8680    | 11550  | 8200   | 730  | -1500 | 2900 | H0 |



|        |      |     |     |   |    |         |        |        |      |       |      |    |
|--------|------|-----|-----|---|----|---------|--------|--------|------|-------|------|----|
| ATOM   | 7423 | HB3 | ASN | C | 66 | -63.713 | 19.885 | -1.413 | 1.00 | 73.91 | H0   |    |
| ANISOU | 7423 | HB3 | ASN | C | 66 | 8420    | 11700  | 7960   | 570  | -1490 | 2810 | H0 |
| ATOM   | 7424 | N   | SER | C | 67 | -64.744 | 19.016 | 2.251  | 1.00 | 70.36 | N0   |    |
| ANISOU | 7424 | N   | SER | C | 67 | 7580    | 11270  | 7880   | 770  | -1270 | 2410 | N0 |
| ATOM   | 7425 | CA  | SER | C | 67 | -65.406 | 17.876 | 2.942  | 1.00 | 70.18 | C0   |    |
| ANISOU | 7425 | CA  | SER | C | 67 | 7370    | 11440  | 7850   | 700  | -1240 | 2280 | C0 |
| ATOM   | 7426 | C   | SER | C | 67 | -66.931 | 18.047 | 2.924  | 1.00 | 72.67 | C0   |    |
| ANISOU | 7426 | C   | SER | C | 67 | 7460    | 11960  | 8180   | 840  | -1360 | 2320 | C0 |
| ATOM   | 7427 | O   | SER | C | 67 | -67.572 | 17.753 | 3.955  | 1.00 | 72.65 | O0   |    |
| ANISOU | 7427 | O   | SER | C | 67 | 7290    | 12050  | 8250   | 890  | -1310 | 2220 | O0 |
| ATOM   | 7428 | CB  | SER | C | 67 | -64.871 | 17.714 | 4.350  | 1.00 | 68.56 | C0   |    |
| ANISOU | 7428 | CB  | SER | C | 67 | 7170    | 11110  | 7770   | 700  | -1090 | 2130 | C0 |
| ATOM   | 7429 | OG  | SER | C | 67 | -65.103 | 18.877 | 5.130  | 1.00 | 69.35 | O0   |    |
| ANISOU | 7429 | OG  | SER | C | 67 | 7250    | 11080  | 8020   | 920  | -1080 | 2140 | O0 |
| ATOM   | 7430 | H   | SER | C | 67 | -64.871 | 19.803 | 2.691  | 1.00 | 71.05 | H0   |    |
| ANISOU | 7430 | H   | SER | C | 67 | 7680    | 11260  | 8060   | 910  | -1270 | 2430 | H0 |
| ATOM   | 7431 | HA  | SER | C | 67 | -65.190 | 17.050 | 2.436  | 1.00 | 69.62 | H0   |    |
| ANISOU | 7431 | HA  | SER | C | 67 | 7330    | 11450  | 7670   | 540  | -1240 | 2260 | H0 |
| ATOM   | 7432 | HB2 | SER | C | 67 | -65.305 | 16.941 | 4.777  | 1.00 | 68.07 | H0   |    |
| ANISOU | 7432 | HB2 | SER | C | 67 | 7000    | 11170  | 7690   | 630  | -1070 | 2050 | H0 |
| ATOM   | 7433 | HB3 | SER | C | 67 | -63.904 | 17.536 | 4.310  | 1.00 | 67.30 | H0   |    |
| ANISOU | 7433 | HB3 | SER | C | 67 | 7140    | 10840  | 7590   | 600  | -1020 | 2100 | H0 |
| ATOM   | 7434 | N   | SER | C | 68 | -67.485 | 18.483 | 1.786  | 1.00 | 75.66 | N0   |    |
| ANISOU | 7434 | N   | SER | C | 68 | 7830    | 12430  | 8480   | 900  | -1500 | 2470 | N0 |
| ATOM   | 7435 | CA  | SER | C | 68 | -68.947 | 18.604 | 1.530  | 1.00 | 78.79 | C0   |    |
| ANISOU | 7435 | CA  | SER | C | 68 | 8010    | 13060  | 8870   | 1030 | -1640 | 2530 | C0 |
| ATOM   | 7436 | C   | SER | C | 68 | -69.548 | 17.213 | 1.309  | 1.00 | 78.73 | C0   |    |
| ANISOU | 7436 | C   | SER | C | 68 | 7850    | 13330  | 8730   | 820  | -1670 | 2460 | C0 |
| ATOM   | 7437 | O   | SER | C | 68 | -70.642 | 16.951 | 1.850  | 1.00 | 79.34 | O0   |    |
| ANISOU | 7437 | O   | SER | C | 68 | 7690    | 13620  | 8840   | 880  | -1690 | 2410 | O0 |
| ATOM   | 7438 | CB  | SER | C | 68 | -69.238 | 19.501 | 0.351  | 1.00 | 81.41 | C0   |    |
| ANISOU | 7438 | CB  | SER | C | 68 | 8400    | 13390  | 9140   | 1150 | -1800 | 2720 | C0 |
| ATOM   | 7439 | OG  | SER | C | 68 | -69.017 | 20.863 | 0.684  | 1.00 | 82.98 | O0   |    |
| ANISOU | 7439 | OG  | SER | C | 68 | 8710    | 13350  | 9470   | 1380 | -1810 | 2790 | O0 |
| ATOM   | 7440 | H   | SER | C | 68 | -66.990 | 18.736 | 1.065  | 1.00 | 75.83 | H0   |    |
| ANISOU | 7440 | H   | SER | C | 68 | 7990    | 12380  | 8440   | 860  | -1530 | 2550 | H0 |
| ATOM   | 7441 | HA  | SER | C | 68 | -69.368 | 19.000 | 2.339  | 1.00 | 79.07 | H0   |    |
| ANISOU | 7441 | HA  | SER | C | 68 | 7940    | 13090  | 9010   | 1170 | -1620 | 2490 | H0 |
| ATOM   | 7442 | HB2 | SER | C | 68 | -68.659 | 19.250 | -0.403 | 1.00 | 81.08 | H0   |    |
| ANISOU | 7442 | HB2 | SER | C | 68 | 8490    | 13320  | 9000   | 1010 | -1810 | 2770 | H0 |
| ATOM   | 7443 | HB3 | SER | C | 68 | -70.174 | 19.381 | 0.072  | 1.00 | 82.90 | H0   |    |
| ANISOU | 7443 | HB3 | SER | C | 68 | 8430    | 13770  | 9300   | 1200 | -1900 | 2750 | H0 |
| ATOM   | 7444 | N   | HIS | C | 69 | -68.860 | 16.374 | 0.525  | 1.00 | 77.87 | N0   |    |
| ANISOU | 7444 | N   | HIS | C | 69 | 7870    | 13230  | 8480   | 590  | -1660 | 2460 | N0 |
| ATOM   | 7445 | CA  | HIS | C | 69 | -69.275 | 14.993 | 0.155  | 1.00 | 77.63 | C0   |    |
| ANISOU | 7445 | CA  | HIS | C | 69 | 7760    | 13430  | 8310   | 370  | -1690 | 2400 | C0 |
| ATOM   | 7446 | C   | HIS | C | 69 | -68.137 | 14.028 | 0.512  | 1.00 | 74.43 | C0   |    |
| ANISOU | 7446 | C   | HIS | C | 69 | 7510    | 12900  | 7880   | 160  | -1550 | 2260 | C0 |
| ATOM   | 7447 | O   | HIS | C | 69 | -67.840 | 13.120 | -0.293 | 1.00 | 74.17 | O0   |    |
| ANISOU | 7447 | O   | HIS | C | 69 | 7550    | 12930  | 7690   | -30  | -1580 | 2240 | O0 |
| ATOM   | 7448 | CB  | HIS | C | 69 | -69.682 | 14.950 | -1.327 | 1.00 | 79.91 | C0   |    |
| ANISOU | 7448 | CB  | HIS | C | 69 | 8060    | 13870  | 8440   | 310  | -1840 | 2530 | C0 |
| ATOM   | 7449 | CG  | HIS | C | 69 | -70.641 | 16.027 | -1.712 | 1.00 | 82.56 | C0   |    |
| ANISOU | 7449 | CG  | HIS | C | 69 | 8270    | 14290  | 8810   | 540  | -1980 | 2670 | C0 |

|                          |         |        |        |      |       |      |    |
|--------------------------|---------|--------|--------|------|-------|------|----|
| ATOM 7450 ND1 HIS C 69   | -72.001 | 15.927 | -1.481 | 1.00 | 84.69 | N0   |    |
| ANISOU 7450 ND1 HIS C 69 | 8280    | 14810  | 9090   | 620  | -2070 | 2670 | N0 |
| ATOM 7451 CD2 HIS C 69   | -70.445 | 17.229 | -2.295 | 1.00 | 84.20 | C0   |    |
| ANISOU 7451 CD2 HIS C 69 | 8590    | 14360  | 9040   | 710  | -2060 | 2820 | C0 |
| ATOM 7452 CE1 HIS C 69   | -72.602 | 17.017 | -1.916 | 1.00 | 86.65 | C0   |    |
| ANISOU 7452 CE1 HIS C 69 | 8470    | 15080  | 9380   | 850  | -2200 | 2810 | C0 |
| ATOM 7453 NE2 HIS C 69   | -71.669 | 17.833 | -2.420 | 1.00 | 86.54 | N0   |    |
| ANISOU 7453 NE2 HIS C 69 | 8700    | 14810  | 9370   | 910  | -2200 | 2910 | N0 |
| ATOM 7454 H HIS C 69     | -68.065 | 16.604 | 0.143  | 1.00 | 77.29 | H0   |    |
| ANISOU 7454 H HIS C 69   | 7960    | 13020  | 8390   | 560  | -1630 | 2490 | H0 |
| ATOM 7455 HA HIS C 69    | -70.060 | 14.754 | 0.701  | 1.00 | 78.04 | H0   |    |
| ANISOU 7455 HA HIS C 69  | 7640    | 13620  | 8400   | 390  | -1700 | 2350 | H0 |
| ATOM 7456 HB2 HIS C 69   | -68.875 | 15.031 | -1.882 | 1.00 | 79.30 | H0   |    |
| ANISOU 7456 HB2 HIS C 69 | 8150    | 13680  | 8310   | 250  | -1820 | 2560 | H0 |
| ATOM 7457 HB3 HIS C 69   | -70.091 | 14.077 | -1.519 | 1.00 | 79.91 | H0   |    |
| ANISOU 7457 HB3 HIS C 69 | 7980    | 14030  | 8350   | 170  | -1870 | 2480 | H0 |
| ATOM 7458 HD2 HIS C 69   | -69.623 | 17.587 | -2.572 | 1.00 | 83.54 | H0   |    |
| ANISOU 7458 HD2 HIS C 69 | 8680    | 14110  | 8950   | 690  | -2020 | 2860 | H0 |
| ATOM 7459 HE1 HIS C 69   | -73.527 | 17.190 | -1.876 | 1.00 | 88.29 | H0   |    |
| ANISOU 7459 HE1 HIS C 69 | 8500    | 15450  | 9600   | 960  | -2280 | 2830 | H0 |
| ATOM 7460 N SER C 70     | -67.539 | 14.224 | 1.691  | 1.00 | 71.77 | N0   |    |
| ANISOU 7460 N SER C 70   | 7210    | 12380  | 7670   | 220  | -1420 | 2170 | N0 |
| ATOM 7461 CA SER C 70    | -66.303 | 13.540 | 2.148  | 1.00 | 68.52 | C0   |    |
| ANISOU 7461 CA SER C 70  | 6960    | 11810  | 7260   | 70   | -1280 | 2050 | C0 |
| ATOM 7462 C SER C 70     | -66.199 | 13.633 | 3.668  | 1.00 | 65.54 | C0   |    |
| ANISOU 7462 C SER C 70   | 6530    | 11340  | 7040   | 140  | -1170 | 1940 | C0 |
| ATOM 7463 O SER C 70     | -66.817 | 14.506 | 4.276  | 1.00 | 65.56 | O0   |    |
| ANISOU 7463 O SER C 70   | 6420    | 11340  | 7150   | 330  | -1170 | 1970 | O0 |
| ATOM 7464 CB SER C 70    | -65.096 | 14.139 | 1.468  | 1.00 | 68.90 | C0   |    |
| ANISOU 7464 CB SER C 70  | 7220    | 11670  | 7290   | 80   | -1250 | 2110 | C0 |
| ATOM 7465 OG SER C 70    | -64.047 | 13.189 | 1.358  | 1.00 | 68.72 | O0   |    |
| ANISOU 7465 OG SER C 70  | 7330    | 11590  | 7190   | -100 | -1170 | 2000 | O0 |
| ATOM 7466 H SER C 70     | -67.860 | 14.804 | 2.315  | 1.00 | 72.12 | H0   |    |
| ANISOU 7466 H SER C 70   | 7180    | 12400  | 7820   | 350  | -1400 | 2170 | H0 |
| ATOM 7467 HA SER C 70    | -66.371 | 12.582 | 1.892  | 1.00 | 68.22 | H0   |    |
| ANISOU 7467 HA SER C 70  | 6920    | 11870  | 7130   | -80  | -1300 | 2000 | H0 |
| ATOM 7468 HB2 SER C 70   | -65.347 | 14.453 | 0.570  | 1.00 | 70.25 | H0   |    |
| ANISOU 7468 HB2 SER C 70 | 7400    | 11900  | 7390   | 90   | -1340 | 2210 | H0 |
| ATOM 7469 HB3 SER C 70   | -64.781 | 14.913 | 1.985  | 1.00 | 68.78 | H0   |    |
| ANISOU 7469 HB3 SER C 70 | 7240    | 11520  | 7380   | 190  | -1200 | 2120 | H0 |
| ATOM 7470 N PROC 71      | -65.435 | 12.731 | 4.331  | 1.00 | 62.33 | N0   |    |
| ANISOU 7470 N PROC 71    | 6210    | 10850  | 6630   | 0    | -1060 | 1810 | N0 |
| ATOM 7471 CA PROC 71     | -65.188 | 12.837 | 5.770  | 1.00 | 60.16 | C0   |    |
| ANISOU 7471 CA PROC 71   | 5910    | 10460  | 6480   | 60   | -950  | 1710 | C0 |
| ATOM 7472 C PROC 71      | -64.523 | 14.164 | 6.167  | 1.00 | 58.85 | C0   |    |
| ANISOU 7472 C PROC 71    | 5830    | 10080  | 6450   | 240  | -890  | 1740 | C0 |
| ATOM 7473 O PROC 71      | -63.669 | 14.646 | 5.435  | 1.00 | 58.31 | O0   |    |
| ANISOU 7473 O PROC 71    | 5910    | 9890   | 6350   | 240  | -890  | 1800 | O0 |
| ATOM 7474 CB PROC 71     | -64.259 | 11.650 | 6.068  | 1.00 | 58.66 | C0   |    |
| ANISOU 7474 CB PROC 71   | 5850    | 10200  | 6240   | -130 | -880  | 1580 | C0 |
| ATOM 7475 CG PROC 71     | -64.561 | 10.663 | 4.963  | 1.00 | 59.24 | C0   |    |
| ANISOU 7475 CG PROC 71   | 5940    | 10420  | 6150   | -300 | -970  | 1600 | C0 |
| ATOM 7476 CD PROC 71     | -64.813 | 11.530 | 3.750  | 1.00 | 61.19 | C0   |    |
| ANISOU 7476 CD PROC 71   | 6180    | 10720  | 6350   | -210 | -1060 | 1740 | C0 |

|                          |         |        |        |      |            |    |
|--------------------------|---------|--------|--------|------|------------|----|
| ATOM 7477 HA PRO C 71    | -66.040 | 12.722 | 6.260  | 1.00 | 60.81      | H0 |
| ANISOU 7477 HA PRO C 71  | 5850    | 10670  | 6590   | 80   | -970 1690  | H0 |
| ATOM 7478 HB2 PRO C 71   | -63.317 | 11.924 | 6.044  | 1.00 | 57.72      | H0 |
| ANISOU 7478 HB2 PRO C 71 | 5850    | 9930   | 6150   | -120 | -820 1570  | H0 |
| ATOM 7479 HB3 PRO C 71   | -64.455 | 11.262 | 6.948  | 1.00 | 58.07      | H0 |
| ANISOU 7479 HB3 PRO C 71 | 5720    | 10140  | 6210   | -160 | -830 1510  | H0 |
| ATOM 7480 HG2 PRO C 71   | -63.802 | 10.063 | 4.812  | 1.00 | 58.44      | H0 |
| ANISOU 7480 HG2 PRO C 71 | 5960    | 10250  | 6000   | -390 | -940 1540  | H0 |
| ATOM 7481 HG3 PRO C 71   | -65.352 | 10.127 | 5.179  | 1.00 | 59.89      | H0 |
| ANISOU 7481 HG3 PRO C 71 | 5910    | 10640  | 6210   | -360 | -1010 1580 | H0 |
| ATOM 7482 HD2 PRO C 71   | -63.979 | 11.749 | 3.296  | 1.00 | 60.70      | H0 |
| ANISOU 7482 HD2 PRO C 71 | 6250    | 10550  | 6270   | -210 | -1040 1760 | H0 |
| ATOM 7483 HD3 PRO C 71   | -65.414 | 11.088 | 3.122  | 1.00 | 62.07      | H0 |
| ANISOU 7483 HD3 PRO C 71 | 6240    | 10970  | 6370   | -280 | -1140 1770 | H0 |
| ATOM 7484 N ASP C 72     | -64.935 | 14.713 | 7.312  | 1.00 | 57.90      | N0 |
| ANISOU 7484 N ASP C 72   | 5610    | 9940   | 6450   | 370  | -840 1700  | N0 |
| ATOM 7485 CA ASP C 72    | -64.464 | 16.017 | 7.853  | 1.00 | 57.53      | C0 |
| ANISOU 7485 CA ASP C 72  | 5630    | 9690   | 6540   | 560  | -780 1720  | C0 |
| ATOM 7486 C ASP C 72     | -63.040 | 15.874 | 8.403  | 1.00 | 53.68      | C0 |
| ANISOU 7486 C ASP C 72   | 5320    | 8990   | 6090   | 480  | -660 1630  | C0 |
| ATOM 7487 O ASP C 72     | -62.291 | 16.862 | 8.349  | 1.00 | 53.17      | O0 |
| ANISOU 7487 O ASP C 72   | 5380    | 8740   | 6090   | 560  | -630 1680  | O0 |
| ATOM 7488 CB ASP C 72    | -65.423 | 16.534 | 8.931  | 1.00 | 59.19      | C0 |
| ANISOU 7488 CB ASP C 72  | 5670    | 9960   | 6860   | 730  | -760 1670  | C0 |
| ATOM 7489 CG ASP C 72    | -66.800 | 16.888 | 8.394  | 1.00 | 62.33      | C0 |
| ANISOU 7489 CG ASP C 72  | 5880    | 10560  | 7240   | 850  | -890 1760  | C0 |
| ATOM 7490 OD1 ASP C 72   | -66.881 | 17.304 | 7.220  | 1.00 | 64.72      | O0 |
| ANISOU 7490 OD1 ASP C 72 | 6230    | 10870  | 7490   | 890  | -990 1890  | O0 |
| ATOM 7491 OD2 ASP C 72   | -67.778 | 16.744 | 9.148  | 1.00 | 63.58      | O0 |
| ANISOU 7491 OD2 ASP C 72 | 5830    | 10890  | 7430   | 910  | -880 1700  | O0 |
| ATOM 7492 H ASP C 72     | -65.546 | 14.303 | 7.849  | 1.00 | 58.20      | H0 |
| ANISOU 7492 H ASP C 72   | 5530    | 10080  | 6500   | 350  | -830 1650  | H0 |
| ATOM 7493 HA ASP C 72    | -64.448 | 16.669 | 7.113  | 1.00 | 58.31      | H0 |
| ANISOU 7493 HA ASP C 72  | 5780    | 9750   | 6630   | 630  | -840 1820  | H0 |
| ATOM 7494 HB2 ASP C 72   | -65.525 | 15.851 | 9.626  | 1.00 | 58.46      | H0 |
| ANISOU 7494 HB2 ASP C 72 | 5520    | 9930   | 6770   | 640  | -710 1590  | H0 |
| ATOM 7495 HB3 ASP C 72   | -65.038 | 17.334 | 9.342  | 1.00 | 59.18      | H0 |
| ANISOU 7495 HB3 ASP C 72 | 5730    | 9810   | 6950   | 840  | -720 1670  | H0 |
| ATOM 7496 N GLN C 73     | -62.697 | 14.690 | 8.918  | 1.00 | 51.05      | N0 |
| ANISOU 7496 N GLN C 73   | 4990    | 8690   | 5710   | 310  | -600 1520  | N0 |
| ATOM 7497 CA GLN C 73    | -61.448 | 14.424 | 9.678  | 1.00 | 48.70      | C0 |
| ANISOU 7497 CA GLN C 73  | 4820    | 8220   | 5460   | 250  | -490 1420  | C0 |
| ATOM 7498 C GLN C 73     | -60.894 | 13.048 | 9.295  | 1.00 | 46.65      | C0 |
| ANISOU 7498 C GLN C 73   | 4640    | 8010   | 5080   | 50   | -490 1350  | C0 |
| ATOM 7499 O GLN C 73     | -61.698 | 12.156 | 8.968  | 1.00 | 46.57      | O0 |
| ANISOU 7499 O GLN C 73   | 4550    | 8160   | 4980   | -50  | -560 1350  | O0 |
| ATOM 7500 CB GLN C 73    | -61.720 | 14.476 | 11.188 | 1.00 | 48.27      | C0 |
| ANISOU 7500 CB GLN C 73  | 4690    | 8150   | 5500   | 300  | -410 1320  | C0 |
| ATOM 7501 CG GLN C 73    | -62.258 | 15.817 | 11.674 | 1.00 | 49.47      | C0 |
| ANISOU 7501 CG GLN C 73  | 4770    | 8250   | 5780   | 520  | -410 1360  | C0 |
| ATOM 7502 CD GLN C 73    | -62.379 | 15.917 | 13.178 | 1.00 | 48.90      | C0 |
| ANISOU 7502 CD GLN C 73  | 4640    | 8150   | 5800   | 570  | -320 1250  | C0 |
| ATOM 7503 OE1 GLN C 73   | -61.645 | 15.282 | 13.932 | 1.00 | 47.57      | O0 |
| ANISOU 7503 OE1 GLN C 73 | 4540    | 7910   | 5630   | 460  | -240 1150  | O0 |

|                           |         |        |        |      |       |      |    |
|---------------------------|---------|--------|--------|------|-------|------|----|
| ATOM 7504 NE2 GLN C 73    | -63.304 | 16.748 | 13.633 | 1.00 | 50.10 | N0   |    |
| ANISOU 7504 NE2 GLN C 73  | 4660    | 8350   | 6020   | 750  | -330  | 1260 | N0 |
| ATOM 7505 H GLN C 73      | -63.228 | 13.954 | 8.837  | 1.00 | 51.37 | H0   |    |
| ANISOU 7505 H GLN C 73    | 4960    | 8860   | 5700   | 240  | -640  | 1500 | H0 |
| ATOM 7506 HA GLN C 73     | -60.786 | 15.112 | 9.445  | 1.00 | 48.53 | H0   |    |
| ANISOU 7506 HA GLN C 73   | 4900    | 8080   | 5470   | 290  | -470  | 1450 | H0 |
| ATOM 7507 HB2 GLN C 73    | -62.365 | 13.774 | 11.411 | 1.00 | 48.41 | H0   |    |
| ANISOU 7507 HB2 GLN C 73  | 4610    | 8300   | 5480   | 240  | -430  | 1290 | H0 |
| ATOM 7508 HB3 GLN C 73    | -60.884 | 14.277 | 11.659 | 1.00 | 47.10 | H0   |    |
| ANISOU 7508 HB3 GLN C 73  | 4630    | 7890   | 5380   | 250  | -350  | 1260 | H0 |
| ATOM 7509 HG2 GLN C 73    | -61.665 | 16.531 | 11.357 | 1.00 | 49.48 | H0   |    |
| ANISOU 7509 HG2 GLN C 73  | 4880    | 8120   | 5810   | 570  | -400  | 1400 | H0 |
| ATOM 7510 HG3 GLN C 73    | -63.142 | 15.967 | 11.277 | 1.00 | 50.69 | H0   |    |
| ANISOU 7510 HG3 GLN C 73  | 4820    | 8520   | 5910   | 570  | -480  | 1410 | H0 |
| ATOM 7511 HE21 GLN C 73   | -63.590 | 16.678 | 14.466 | 1.00 | 50.13 | H0   |    |
| ANISOU 7511 HE21 GLN C 73 | 4590    | 8390   | 6060   | 770  | -280  | 1190 | H0 |
| ATOM 7512 HE22 GLN C 73   | -63.635 | 17.375 | 13.104 | 1.00 | 51.25 | H0   |    |
| ANISOU 7512 HE22 GLN C 73 | 4790    | 8490   | 6180   | 850  | -380  | 1330 | H0 |
| ATOM 7513 N VAL C 74      | -59.571 | 12.888 | 9.354  | 1.00 | 45.12 | N0   |    |
| ANISOU 7513 N VAL C 74    | 4590    | 7670   | 4890   | -10  | -420  | 1300 | N0 |
| ATOM 7514 CA VAL C 74     | -58.873 | 11.571 | 9.251  | 1.00 | 44.46 | C0   |    |
| ANISOU 7514 CA VAL C 74   | 4590    | 7590   | 4710   | -170 | -410  | 1200 | C0 |
| ATOM 7515 C VAL C 74      | -57.755 | 11.506 | 10.295 | 1.00 | 43.07 | C0   |    |
| ANISOU 7515 C VAL C 74    | 4500    | 7250   | 4610   | -170 | -300  | 1090 | C0 |
| ATOM 7516 O VAL C 74      | -57.173 | 12.551 | 10.618 | 1.00 | 43.11 | O0   |    |
| ANISOU 7516 O VAL C 74    | 4540    | 7140   | 4700   | -70  | -250  | 1110 | O0 |
| ATOM 7517 CB VAL C 74     | -58.313 | 11.321 | 7.837  | 1.00 | 44.58 | C0   |    |
| ANISOU 7517 CB VAL C 74   | 4700    | 7630   | 4610   | -240 | -450  | 1240 | C0 |
| ATOM 7518 CG1 VAL C 74    | -59.422 | 11.186 | 6.811  | 1.00 | 45.98 | C0   |    |
| ANISOU 7518 CG1 VAL C 74  | 4800    | 7980   | 4690   | -260 | -560  | 1330 | C0 |
| ATOM 7519 CG2 VAL C 74    | -57.326 | 12.396 | 7.420  | 1.00 | 44.92 | C0   |    |
| ANISOU 7519 CG2 VAL C 74  | 4840    | 7550   | 4680   | -180 | -400  | 1290 | C0 |
| ATOM 7520 H VAL C 74      | -58.999 | 13.590 | 9.462  | 1.00 | 45.11 | H0   |    |
| ANISOU 7520 H VAL C 74    | 4650    | 7550   | 4940   | 50   | -380  | 1310 | H0 |
| ATOM 7521 HA VAL C 74     | -59.517 | 10.872 | 9.452  | 1.00 | 44.56 | H0   |    |
| ANISOU 7521 HA VAL C 74   | 4550    | 7690   | 4690   | -220 | -440  | 1170 | H0 |
| ATOM 7522 HB VAL C 74     | -57.824 | 10.461 | 7.863  | 1.00 | 44.00 | H0   |    |
| ANISOU 7522 HB VAL C 74   | 4690    | 7550   | 4480   | -320 | -440  | 1160 | H0 |
| ATOM 7523 HG11 VAL C 74   | -60.034 | 10.481 | 7.084  | 1.00 | 46.07 | H0   |    |
| ANISOU 7523 HG11 VAL C 74 | 4750    | 8070   | 4680   | -320 | -590  | 1290 | H0 |
| ATOM 7524 HG12 VAL C 74   | -59.038 | 10.963 | 5.945  | 1.00 | 46.20 | H0   |    |
| ANISOU 7524 HG12 VAL C 74 | 4890    | 8030   | 4630   | -320 | -580  | 1350 | H0 |
| ATOM 7525 HG13 VAL C 74   | -59.906 | 12.027 | 6.743  | 1.00 | 46.79 | H0   |    |
| ANISOU 7525 HG13 VAL C 74 | 4850    | 8090   | 4840   | -170 | -580  | 1410 | H0 |
| ATOM 7526 HG21 VAL C 74   | -57.790 | 13.248 | 7.336  | 1.00 | 45.61 | H0   |    |
| ANISOU 7526 HG21 VAL C 74 | 4890    | 7630   | 4810   | -90  | -430  | 1380 | H0 |
| ATOM 7527 HG22 VAL C 74   | -56.931 | 12.158 | 6.563  | 1.00 | 45.03 | H0   |    |
| ANISOU 7527 HG22 VAL C 74 | 4910    | 7600   | 4600   | -240 | -420  | 1310 | H0 |
| ATOM 7528 HG23 VAL C 74   | -56.625 | 12.475 | 8.087  | 1.00 | 43.96 | H0   |    |
| ANISOU 7528 HG23 VAL C 74 | 4760    | 7330   | 4610   | -170 | -330  | 1230 | H0 |
| ATOM 7529 N SER C 75      | -57.464 | 10.307 | 10.791 | 1.00 | 42.86 | N0   |    |
| ANISOU 7529 N SER C 75    | 4510    | 7230   | 4550   | -270 | -290  | 990  | N0 |
| ATOM 7530 CA SER C 75     | -56.245 | 9.997  | 11.580 | 1.00 | 42.02 | C0   |    |
| ANISOU 7530 CA SER C 75   | 4500    | 6980   | 4480   | -290 | -220  | 880  | C0 |

|                           |         |        |        |      |       |      |    |
|---------------------------|---------|--------|--------|------|-------|------|----|
| ATOM 7531 C SER C 75      | -55.109 | 9.663  | 10.608 | 1.00 | 41.89 | C0   |    |
| ANISOU 7531 C SER C 75    | 4600    | 6940   | 4380   | -340 | -210  | 850  | C0 |
| ATOM 7532 O SER C 75      | -55.320 | 8.805  | 9.734  | 1.00 | 41.70 | O0   |    |
| ANISOU 7532 O SER C 75    | 4600    | 7000   | 4240   | -420 | -280  | 840  | O0 |
| ATOM 7533 CB SER C 75     | -56.487 | 8.879  | 12.553 | 1.00 | 41.23 | C0   |    |
| ANISOU 7533 CB SER C 75   | 4400    | 6890   | 4370   | -370 | -220  | 790  | C0 |
| ATOM 7534 OG SER C 75     | -57.661 | 9.127  | 13.306 | 1.00 | 42.65 | O0   |    |
| ANISOU 7534 OG SER C 75   | 4460    | 7150   | 4600   | -350 | -220  | 820  | O0 |
| ATOM 7535 H SER C 75      | -57.998 | 9.577  | 10.677 | 1.00 | 43.07 | H0   |    |
| ANISOU 7535 H SER C 75    | 4510    | 7340   | 4520   | -340 | -340  | 970  | H0 |
| ATOM 7536 HA SER C 75     | -55.993 | 10.811 | 12.092 | 1.00 | 41.72 | H0   |    |
| ANISOU 7536 HA SER C 75   | 4460    | 6870   | 4520   | -210 | -170  | 890  | H0 |
| ATOM 7537 HB2 SER C 75    | -56.582 | 8.031  | 12.062 | 1.00 | 41.65 | H0   |    |
| ANISOU 7537 HB2 SER C 75  | 4490    | 6990   | 4340   | -450 | -270  | 770  | H0 |
| ATOM 7538 HB3 SER C 75    | -55.716 | 8.799  | 13.160 | 1.00 | 40.70 | H0   |    |
| ANISOU 7538 HB3 SER C 75  | 4390    | 6730   | 4340   | -370 | -170  | 720  | H0 |
| ATOM 7539 N VAL C 76      | -53.958 | 10.317 | 10.779 | 1.00 | 42.03 | N0   |    |
| ANISOU 7539 N VAL C 76    | 4680    | 6840   | 4440   | -290 | -140  | 830  | N0 |
| ATOM 7540 CA VAL C 76     | -52.783 | 10.254 | 9.863  | 1.00 | 42.26 | C0   |    |
| ANISOU 7540 CA VAL C 76   | 4800    | 6860   | 4400   | -330 | -120  | 810  | C0 |
| ATOM 7541 C VAL C 76      | -51.541 | 9.972  | 10.700 | 1.00 | 41.16 | C0   |    |
| ANISOU 7541 C VAL C 76    | 4710    | 6620   | 4300   | -330 | -50   | 690  | C0 |
| ATOM 7542 O VAL C 76      | -51.352 | 10.606 | 11.731 | 1.00 | 40.24 | O0   |    |
| ANISOU 7542 O VAL C 76    | 4580    | 6420   | 4290   | -280 | 10    | 680  | O0 |
| ATOM 7543 CB VAL C 76     | -52.646 | 11.577 | 9.089  | 1.00 | 43.11 | C0   |    |
| ANISOU 7543 CB VAL C 76   | 4910    | 6960   | 4510   | -290 | -100  | 930  | C0 |
| ATOM 7544 CG1 VAL C 76    | -51.381 | 11.629 | 8.247  | 1.00 | 43.34 | C0   |    |
| ANISOU 7544 CG1 VAL C 76  | 5010    | 7000   | 4460   | -340 | -60   | 900  | C0 |
| ATOM 7545 CG2 VAL C 76    | -53.873 | 11.850 | 8.237  | 1.00 | 44.61 | C0   |    |
| ANISOU 7545 CG2 VAL C 76  | 5040    | 7250   | 4650   | -270 | -190  | 1050 | C0 |
| ATOM 7546 H VAL C 76      | -53.816 | 10.863 | 11.495 | 1.00 | 41.61 | H0   |    |
| ANISOU 7546 H VAL C 76    | 4610    | 6720   | 4470   | -240 | -100  | 820  | H0 |
| ATOM 7547 HA VAL C 76     | -52.917 | 9.528  | 9.231  | 1.00 | 42.48 | H0   |    |
| ANISOU 7547 HA VAL C 76   | 4840    | 6960   | 4340   | -380 | -160  | 790  | H0 |
| ATOM 7548 HB VAL C 76     | -52.584 | 12.301 | 9.760  | 1.00 | 43.00 | H0   |    |
| ANISOU 7548 HB VAL C 76   | 4880    | 6870   | 4590   | -230 | -70   | 940  | H0 |
| ATOM 7549 HG11 VAL C 76   | -50.621 | 11.844 | 8.814  | 1.00 | 42.74 | H0   |    |
| ANISOU 7549 HG11 VAL C 76 | 4960    | 6850   | 4430   | -320 | -10   | 850  | H0 |
| ATOM 7550 HG12 VAL C 76   | -51.473 | 12.312 | 7.561  | 1.00 | 44.07 | H0   |    |
| ANISOU 7550 HG12 VAL C 76 | 5110    | 7110   | 4520   | -330 | -80   | 1000 | H0 |
| ATOM 7551 HG13 VAL C 76   | -51.236 | 10.765 | 7.824  | 1.00 | 43.27 | H0   |    |
| ANISOU 7551 HG13 VAL C 76 | 5020    | 7050   | 4370   | -380 | -90   | 850  | H0 |
| ATOM 7552 HG21 VAL C 76   | -54.016 | 11.107 | 7.625  | 1.00 | 44.74 | H0   |    |
| ANISOU 7552 HG21 VAL C 76 | 5060    | 7350   | 4580   | -330 | -230  | 1030 | H0 |
| ATOM 7553 HG22 VAL C 76   | -53.742 | 12.668 | 7.728  | 1.00 | 45.13 | H0   |    |
| ANISOU 7553 HG22 VAL C 76 | 5120    | 7310   | 4720   | -250 | -190  | 1130 | H0 |
| ATOM 7554 HG23 VAL C 76   | -54.651 | 11.948 | 8.813  | 1.00 | 44.58 | H0   |    |
| ANISOU 7554 HG23 VAL C 76 | 4970    | 7260   | 4710   | -230 | -210  | 1070 | H0 |
| ATOM 7555 N PRO C 77      | -50.644 | 9.047  | 10.284 | 1.00 | 41.58 | N0   |    |
| ANISOU 7555 N PRO C 77    | 4830    | 6700   | 4270   | -370 | -40   | 590  | N0 |
| ATOM 7556 CA PRO C 77     | -49.355 | 8.880  | 10.958 | 1.00 | 40.60 | C0   |    |
| ANISOU 7556 CA PRO C 77   | 4750    | 6490   | 4180   | -360 | 20    | 480  | C0 |
| ATOM 7557 C PRO C 77      | -48.527 | 10.168 | 10.847 | 1.00 | 40.84 | C0   |    |
| ANISOU 7557 C PRO C 77    | 4770    | 6490   | 4260   | -330 | 100   | 520  | C0 |

|                           |         |        |        |      |       |     |    |
|---------------------------|---------|--------|--------|------|-------|-----|----|
| ATOM 7558 O PROC 77       | -48.560 | 10.795 | 9.806  | 1.00 | 41.65 | O0  |    |
| ANISOU 7558 O PROC 77     | 4880    | 6650   | 4300   | -350 | 90    | 610 | O0 |
| ATOM 7559 CB PROC 77      | -48.694 | 7.703  | 10.223 | 1.00 | 41.13 | C0  |    |
| ANISOU 7559 CB PROC 77    | 4880    | 6620   | 4130   | -390 | -10   | 370 | C0 |
| ATOM 7560 CG PROC 77      | -49.386 | 7.665  | 8.871  | 1.00 | 41.89 | C0  |    |
| ANISOU 7560 CG PROC 77    | 4970    | 6820   | 4120   | -440 | -60   | 450 | C0 |
| ATOM 7561 CD PROC 77      | -50.804 | 8.128  | 9.144  | 1.00 | 42.32 | C0  |    |
| ANISOU 7561 CD PROC 77    | 4960    | 6890   | 4230   | -440 | -110  | 570 | C0 |
| ATOM 7562 HA PROC 77      | -49.503 | 8.644  | 11.908 | 1.00 | 40.19 | H0  |    |
| ANISOU 7562 HA PROC 77    | 4690    | 6390   | 4190   | -340 | 20    | 440 | H0 |
| ATOM 7563 HB2 PROC 77     | -47.730 | 7.852  | 10.117 | 1.00 | 40.94 | H0  |    |
| ANISOU 7563 HB2 PROC 77   | 4870    | 6590   | 4100   | -380 | 40    | 320 | H0 |
| ATOM 7564 HB3 PROC 77     | -48.834 | 6.863  | 10.709 | 1.00 | 40.73 | H0  |    |
| ANISOU 7564 HB3 PROC 77   | 4860    | 6540   | 4080   | -400 | -40   | 300 | H0 |
| ATOM 7565 HG2 PROC 77     | -48.942 | 8.263  | 8.236  | 1.00 | 42.41 | H0  |    |
| ANISOU 7565 HG2 PROC 77   | 5030    | 6930   | 4160   | -440 | -30   | 490 | H0 |
| ATOM 7566 HG3 PROC 77     | -49.383 | 6.757  | 8.505  | 1.00 | 42.21 | H0  |    |
| ANISOU 7566 HG3 PROC 77   | 5050    | 6900   | 4090   | -470 | -100  | 380 | H0 |
| ATOM 7567 HD2 PROC 77     | -51.176 | 8.587  | 8.369  | 1.00 | 42.93 | H0  |    |
| ANISOU 7567 HD2 PROC 77   | 5020    | 7030   | 4270   | -440 | -130  | 650 | H0 |
| ATOM 7568 HD3 PROC 77     | -51.381 | 7.378  | 9.377  | 1.00 | 42.24 | H0  |    |
| ANISOU 7568 HD3 PROC 77   | 4950    | 6890   | 4210   | -470 | -160  | 540 | H0 |
| ATOM 7569 N ILE C 78      | -47.826 | 10.543 | 11.918 | 1.00 | 41.19 | N0  |    |
| ANISOU 7569 N ILE C 78    | 4820    | 6440   | 4390   | -300 | 160   | 470 | N0 |
| ATOM 7570 CA ILE C 78     | -47.112 | 11.854 | 12.015 | 1.00 | 42.24 | C0  |    |
| ANISOU 7570 CA ILE C 78   | 4950    | 6520   | 4580   | -290 | 230   | 520 | C0 |
| ATOM 7571 C ILE C 78      | -45.914 | 11.888 | 11.057 | 1.00 | 42.97 | C0  |    |
| ANISOU 7571 C ILE C 78    | 5070    | 6690   | 4570   | -340 | 260   | 490 | C0 |
| ATOM 7572 O ILE C 78      | -45.468 | 13.006 | 10.763 | 1.00 | 43.26 | O0  |    |
| ANISOU 7572 O ILE C 78    | 5110    | 6700   | 4620   | -370 | 310   | 560 | O0 |
| ATOM 7573 CB ILE C 78     | -46.682 | 12.176 | 13.459 | 1.00 | 41.99 | C0  |    |
| ANISOU 7573 CB ILE C 78   | 4920    | 6380   | 4660   | -260 | 270   | 460 | C0 |
| ATOM 7574 CG1 ILE C 78    | -45.648 | 11.175 | 13.986 | 1.00 | 41.29 | C0  |    |
| ANISOU 7574 CG1 ILE C 78  | 4840    | 6300   | 4550   | -260 | 290   | 310 | C0 |
| ATOM 7575 CG2 ILE C 78    | -47.902 | 12.291 | 14.362 | 1.00 | 41.89 | C0  |    |
| ANISOU 7575 CG2 ILE C 78  | 4870    | 6320   | 4730   | -210 | 250   | 490 | C0 |
| ATOM 7576 CD1 ILE C 78    | -45.149 | 11.484 | 15.370 | 1.00 | 41.30 | C0  |    |
| ANISOU 7576 CD1 ILE C 78  | 4840    | 6200   | 4650   | -240 | 330   | 250 | C0 |
| ATOM 7577 H ILE C 78      | -47.746 | 10.022 | 12.659 | 1.00 | 40.60 | H0  |    |
| ANISOU 7577 H ILE C 78    | 4750    | 6330   | 4350   | -290 | 150   | 400 | H0 |
| ATOM 7578 HA ILE C 78     | -47.735 | 12.548 | 11.733 | 1.00 | 42.72 | H0  |    |
| ANISOU 7578 HA ILE C 78   | 5000    | 6570   | 4660   | -280 | 210   | 620 | H0 |
| ATOM 7579 HB ILE C 78     | -46.244 | 13.062 | 13.441 | 1.00 | 42.17 | H0  |    |
| ANISOU 7579 HB ILE C 78   | 4950    | 6370   | 4710   | -260 | 320   | 490 | H0 |
| ATOM 7580 HG12 ILE C 78   | -46.049 | 10.280 | 13.990 | 1.00 | 41.28 | H0  |    |
| ANISOU 7580 HG12 ILE C 78 | 4850    | 6320   | 4520   | -260 | 240   | 280 | H0 |
| ATOM 7581 HG13 ILE C 78   | -44.882 | 11.159 | 13.374 | 1.00 | 41.77 | H0  |    |
| ANISOU 7581 HG13 ILE C 78 | 4910    | 6410   | 4550   | -290 | 310   | 290 | H0 |
| ATOM 7582 HG21 ILE C 78   | -48.604 | 12.783 | 13.901 | 1.00 | 42.41 | H0  |    |
| ANISOU 7582 HG21 ILE C 78 | 4920    | 6400   | 4790   | -190 | 230   | 580 | H0 |
| ATOM 7583 HG22 ILE C 78   | -47.661 | 12.764 | 15.176 | 1.00 | 41.56 | H0  |    |
| ANISOU 7583 HG22 ILE C 78 | 4830    | 6200   | 4750   | -190 | 290   | 470 | H0 |
| ATOM 7584 HG23 ILE C 78   | -48.227 | 11.402 | 14.588 | 1.00 | 41.53 | H0  |    |
| ANISOU 7584 HG23 ILE C 78 | 4820    | 6300   | 4660   | -220 | 210   | 450 | H0 |

|                           |         |        |        |      |       |     |    |
|---------------------------|---------|--------|--------|------|-------|-----|----|
| ATOM 7585 HD11 ILE C 78   | -44.881 | 12.418 | 15.419 | 1.00 | 41.32 | H0  |    |
| ANISOU 7585 HD11 ILE C 78 | 4840    | 6170   | 4690   | -240 | 370   | 290 | H0 |
| ATOM 7586 HD12 ILE C 78   | -44.384 | 10.918 | 15.574 | 1.00 | 40.84 | H0  |    |
| ANISOU 7586 HD12 ILE C 78 | 4790    | 6160   | 4570   | -240 | 330   | 170 | H0 |
| ATOM 7587 HD13 ILE C 78   | -45.856 | 11.316 | 16.017 | 1.00 | 40.79 | H0  |    |
| ANISOU 7587 HD13 ILE C 78 | 4770    | 6100   | 4620   | -220 | 310   | 260 | H0 |
| ATOM 7588 N SER C 79      | -45.412 | 10.731 | 10.600 | 1.00 | 43.60 | N0  |    |
| ANISOU 7588 N SER C 79    | 5160    | 6850   | 4560   | -360 | 250   | 380 | N0 |
| ATOM 7589 CA SER C 79     | -44.286 | 10.613 | 9.627  | 1.00 | 45.01 | C0  |    |
| ANISOU 7589 CA SER C 79   | 5340    | 7140   | 4630   | -400 | 290   | 330 | C0 |
| ATOM 7590 C SER C 79      | -44.677 | 11.204 | 8.264  | 1.00 | 45.47 | C0  |    |
| ANISOU 7590 C SER C 79    | 5400    | 7280   | 4590   | -460 | 280   | 460 | C0 |
| ATOM 7591 O SER C 79      | -43.770 | 11.630 | 7.529  | 1.00 | 46.97 | O0  |    |
| ANISOU 7591 O SER C 79    | 5590    | 7550   | 4700   | -520 | 330   | 460 | O0 |
| ATOM 7592 CB SER C 79     | -43.803 | 9.180  | 9.490  | 1.00 | 45.74 | C0  |    |
| ANISOU 7592 CB SER C 79   | 5440    | 7290   | 4650   | -380 | 260   | 180 | C0 |
| ATOM 7593 OG SER C 79     | -44.833 | 8.248  | 9.811  | 1.00 | 46.71 | O0  |    |
| ANISOU 7593 OG SER C 79   | 5600    | 7370   | 4780   | -360 | 180   | 160 | O0 |
| ATOM 7594 H SER C 79      | -45.718 | 9.916  | 10.869 | 1.00 | 43.27 | H0  |    |
| ANISOU 7594 H SER C 79    | 5120    | 6800   | 4520   | -340 | 210   | 330 | H0 |
| ATOM 7595 HA SER C 79     | -43.531 | 11.155 | 9.982  | 1.00 | 44.84 | H0  |    |
| ANISOU 7595 HA SER C 79   | 5300    | 7090   | 4640   | -410 | 340   | 310 | H0 |
| ATOM 7596 HB2 SER C 79    | -43.499 | 9.025  | 8.567  | 1.00 | 46.54 | H0  |    |
| ANISOU 7596 HB2 SER C 79  | 5550    | 7480   | 4650   | -410 | 270   | 160 | H0 |
| ATOM 7597 HB3 SER C 79    | -43.037 | 9.037  | 10.090 | 1.00 | 45.52 | H0  |    |
| ANISOU 7597 HB3 SER C 79  | 5400    | 7240   | 4650   | -350 | 290   | 90  | H0 |
| ATOM 7598 N SER C 80      | -45.974 | 11.241 | 7.943  | 1.00 | 45.27 | N0  |    |
| ANISOU 7598 N SER C 80    | 5380    | 7250   | 4570   | -450 | 210   | 560 | N0 |
| ATOM 7599 CA SER C 80     | -46.528 | 11.836 | 6.697  | 1.00 | 45.78 | C0  |    |
| ANISOU 7599 CA SER C 80   | 5460    | 7390   | 4540   | -500 | 170   | 700 | C0 |
| ATOM 7600 C SER C 80      | -46.743 | 13.347 | 6.860  | 1.00 | 45.68 | C0  |    |
| ANISOU 7600 C SER C 80    | 5460    | 7280   | 4610   | -490 | 190   | 850 | C0 |
| ATOM 7601 O SER C 80      | -47.092 | 13.990 | 5.861  | 1.00 | 46.65 | O0  |    |
| ANISOU 7601 O SER C 80    | 5610    | 7450   | 4660   | -530 | 160   | 980 | O0 |
| ATOM 7602 CB SER C 80     | -47.815 | 11.154 | 6.307  | 1.00 | 46.80 | C0  |    |
| ANISOU 7602 CB SER C 80   | 5580    | 7560   | 4640   | -490 | 80    | 730 | C0 |
| ATOM 7603 OG SER C 80     | -47.682 | 9.738  | 6.365  | 1.00 | 47.65 | O0  |    |
| ANISOU 7603 OG SER C 80   | 5700    | 7710   | 4690   | -490 | 50    | 590 | O0 |
| ATOM 7604 H SER C 80      | -46.626 | 10.886 | 8.470  | 1.00 | 44.76 | H0  |    |
| ANISOU 7604 H SER C 80    | 5310    | 7140   | 4550   | -420 | 170   | 550 | H0 |
| ATOM 7605 HA SER C 80     | -45.866 | 11.695 | 5.968  | 1.00 | 46.49 | H0  |    |
| ANISOU 7605 HA SER C 80   | 5560    | 7560   | 4540   | -550 | 200   | 670 | H0 |
| ATOM 7606 HB2 SER C 80    | -48.534 | 11.441 | 6.915  | 1.00 | 46.61 | H0  |    |
| ANISOU 7606 HB2 SER C 80  | 5540    | 7470   | 4700   | -450 | 50    | 780 | H0 |
| ATOM 7607 HB3 SER C 80    | -48.063 | 11.423 | 5.393  | 1.00 | 47.75 | H0  |    |
| ANISOU 7607 HB3 SER C 80  | 5710    | 7750   | 4680   | -520 | 50    | 810 | H0 |
| ATOM 7608 N LEU C 81      | -46.568 | 13.898 | 8.070  | 1.00 | 44.46 | N0  |    |
| ANISOU 7608 N LEU C 81    | 5300    | 7000   | 4590   | -450 | 230   | 830 | N0 |
| ATOM 7609 CA LEU C 81     | -46.902 | 15.313 | 8.395  | 1.00 | 44.09 | C0  |    |
| ANISOU 7609 CA LEU C 81   | 5280    | 6830   | 4640   | -420 | 230   | 950 | C0 |
| ATOM 7610 C LEU C 81      | -45.647 | 16.064 | 8.843  | 1.00 | 43.44 | C0  |    |
| ANISOU 7610 C LEU C 81    | 5230    | 6680   | 4590   | -470 | 320   | 920 | C0 |
| ATOM 7611 O LEU C 81      | -44.734 | 15.413 | 9.399  | 1.00 | 42.15 | O0  |    |
| ANISOU 7611 O LEU C 81    | 5040    | 6550   | 4430   | -490 | 370   | 790 | O0 |

|                           |         |        |        |      |       |      |    |
|---------------------------|---------|--------|--------|------|-------|------|----|
| ATOM 7612 CB LEU C 81     | -47.937 | 15.345 | 9.524  | 1.00 | 43.49 | C0   |    |
| ANISOU 7612 CB LEU C 81   | 5170    | 6660   | 4690   | -320 | 200   | 950  | C0 |
| ATOM 7613 CG LEU C 81     | -49.299 | 14.732 | 9.225  | 1.00 | 43.36 | C0   |    |
| ANISOU 7613 CG LEU C 81   | 5110    | 6720   | 4650   | -280 | 120   | 990  | C0 |
| ATOM 7614 CD1 LEU C 81    | -50.156 | 14.738 | 10.481 | 1.00 | 42.84 | C0   |    |
| ANISOU 7614 CD1 LEU C 81  | 4990    | 6580   | 4710   | -190 | 110   | 960  | C0 |
| ATOM 7615 CD2 LEU C 81    | -49.997 | 15.467 | 8.095  | 1.00 | 44.96 | C0   |    |
| ANISOU 7615 CD2 LEU C 81  | 5330    | 6950   | 4800   | -270 | 60    | 1150 | C0 |
| ATOM 7616 H LEU C 81      | -46.229 | 13.437 | 8.775  | 1.00 | 43.63 | H0   |    |
| ANISOU 7616 H LEU C 81    | 5180    | 6870   | 4530   | -430 | 250   | 730  | H0 |
| ATOM 7617 HA LEU C 81     | -47.269 | 15.749 | 7.594  | 1.00 | 45.05 | H0   |    |
| ANISOU 7617 HA LEU C 81   | 5430    | 6980   | 4710   | -440 | 200   | 1060 | H0 |
| ATOM 7618 HB2 LEU C 81    | -47.556 | 14.882 | 10.296 | 1.00 | 42.57 | H0   |    |
| ANISOU 7618 HB2 LEU C 81  | 5040    | 6520   | 4610   | -310 | 230   | 850  | H0 |
| ATOM 7619 HB3 LEU C 81    | -48.073 | 16.278 | 9.783  | 1.00 | 43.80 | H0   |    |
| ANISOU 7619 HB3 LEU C 81  | 5230    | 6610   | 4800   | -290 | 210   | 1020 | H0 |
| ATOM 7620 HG LEU C 81     | -49.163 | 13.793 | 8.947  | 1.00 | 43.16 | H0   |    |
| ANISOU 7620 HG LEU C 81   | 5070    | 6770   | 4560   | -310 | 110   | 920  | H0 |
| ATOM 7621 HD11 LEU C 81   | -49.716 | 14.220 | 11.177 | 1.00 | 41.99 | H0   |    |
| ANISOU 7621 HD11 LEU C 81 | 4880    | 6450   | 4630   | -200 | 140   | 860  | H0 |
| ATOM 7622 HD12 LEU C 81   | -51.024 | 14.345 | 10.285 | 1.00 | 43.04 | H0   |    |
| ANISOU 7622 HD12 LEU C 81 | 4970    | 6670   | 4720   | -170 | 60    | 990  | H0 |
| ATOM 7623 HD13 LEU C 81   | -50.277 | 15.654 | 10.788 | 1.00 | 43.18 | H0   |    |
| ANISOU 7623 HD13 LEU C 81 | 5040    | 6540   | 4820   | -140 | 120   | 1010 | H0 |
| ATOM 7624 HD21 LEU C 81   | -49.951 | 16.426 | 8.254  | 1.00 | 45.37 | H0   |    |
| ANISOU 7624 HD21 LEU C 81 | 5410    | 6920   | 4910   | -240 | 70    | 1210 | H0 |
| ATOM 7625 HD22 LEU C 81   | -50.928 | 15.190 | 8.053  | 1.00 | 45.06 | H0   |    |
| ANISOU 7625 HD22 LEU C 81 | 5290    | 7010   | 4820   | -230 | 0     | 1170 | H0 |
| ATOM 7626 HD23 LEU C 81   | -49.558 | 15.258 | 7.252  | 1.00 | 45.29 | H0   |    |
| ANISOU 7626 HD23 LEU C 81 | 5390    | 7070   | 4750   | -340 | 60    | 1160 | H0 |
| ATOM 7627 N TRP C 82      | -45.625 | 17.386 | 8.640  | 1.00 | 43.51 | N0   |    |
| ANISOU 7627 N TRP C 82    | 5300    | 6600   | 4630   | -500 | 320   | 1050 | N0 |
| ATOM 7628 CA TRP C 82     | -44.737 | 18.307 | 9.397  | 1.00 | 43.21 | C0   |    |
| ANISOU 7628 CA TRP C 82   | 5310    | 6450   | 4660   | -530 | 390   | 1040 | C0 |
| ATOM 7629 C TRP C 82      | -45.252 | 18.382 | 10.839 | 1.00 | 42.11 | C0   |    |
| ANISOU 7629 C TRP C 82    | 5140    | 6180   | 4670   | -420 | 390   | 980  | C0 |
| ATOM 7630 O TRP C 82      | -46.477 | 18.531 | 11.021 | 1.00 | 41.62 | O0   |    |
| ANISOU 7630 O TRP C 82    | 5070    | 6070   | 4670   | -320 | 330   | 1040 | O0 |
| ATOM 7631 CB TRP C 82     | -44.665 | 19.705 | 8.767  | 1.00 | 44.59 | C0   |    |
| ANISOU 7631 CB TRP C 82   | 5580    | 6540   | 4820   | -600 | 380   | 1200 | C0 |
| ATOM 7632 CG TRP C 82     | -43.820 | 20.647 | 9.572  | 1.00 | 44.69 | C0   |    |
| ANISOU 7632 CG TRP C 82   | 5650    | 6420   | 4910   | -650 | 440   | 1180 | C0 |
| ATOM 7633 CD1 TRP C 82    | -42.466 | 20.801 | 9.497  | 1.00 | 44.89 | C0   |    |
| ANISOU 7633 CD1 TRP C 82  | 5680    | 6510   | 4870   | -780 | 520   | 1130 | C0 |
| ATOM 7634 CD2 TRP C 82    | -44.261 | 21.529 | 10.621 | 1.00 | 44.39 | C0   |    |
| ANISOU 7634 CD2 TRP C 82  | 5660    | 6190   | 5020   | -560 | 430   | 1200 | C0 |
| ATOM 7635 NE1 TRP C 82    | -42.041 | 21.731 | 10.405 | 1.00 | 44.94 | N0   |    |
| ANISOU 7635 NE1 TRP C 82  | 5740    | 6360   | 4980   | -810 | 550   | 1130 | N0 |
| ATOM 7636 CE2 TRP C 82    | -43.117 | 22.192 | 11.112 | 1.00 | 44.53 | C0   |    |
| ANISOU 7636 CE2 TRP C 82  | 5730    | 6140   | 5050   | -670 | 500   | 1170 | C0 |
| ATOM 7637 CE3 TRP C 82    | -45.506 | 21.828 | 11.188 | 1.00 | 44.44 | C0   |    |
| ANISOU 7637 CE3 TRP C 82  | 5680    | 6080   | 5130   | -410 | 370   | 1240 | C0 |
| ATOM 7638 CZ2 TRP C 82    | -43.184 | 23.136 | 12.136 | 1.00 | 45.03 | C0   |    |
| ANISOU 7638 CZ2 TRP C 82  | 5860    | 6010   | 5240   | -630 | 500   | 1170 | C0 |



|                           |         |        |        |      |       |      |    |
|---------------------------|---------|--------|--------|------|-------|------|----|
| ATOM 7639 CZ3 TRP C 82    | -45.574 | 22.767 | 12.195 | 1.00 | 44.58 | C0   |    |
| ANISOU 7639 CZ3 TRP C 82  | 5750    | 5910   | 5270   | -360 | 390   | 1230 | C0 |
| ATOM 7640 CH2 TRP C 82    | -44.427 | 23.408 | 12.664 | 1.00 | 44.95 | C0   |    |
| ANISOU 7640 CH2 TRP C 82  | 5870    | 5880   | 5340   | -470 | 450   | 1190 | C0 |
| ATOM 7641 H TRP C 82      | -46.152 | 17.806 | 8.027  | 1.00 | 44.44 | H0   |    |
| ANISOU 7641 H TRP C 82    | 5450    | 6720   | 4720   | -490 | 280   | 1150 | H0 |
| ATOM 7642 HA TRP C 82     | -43.831 | 17.924 | 9.400  | 1.00 | 43.00 | H0   |    |
| ANISOU 7642 HA TRP C 82   | 5250    | 6490   | 4590   | -590 | 440   | 950  | H0 |
| ATOM 7643 HB2 TRP C 82    | -44.294 | 19.623 | 7.865  | 1.00 | 45.27 | H0   |    |
| ANISOU 7643 HB2 TRP C 82  | 5680    | 6720   | 4800   | -680 | 390   | 1230 | H0 |
| ATOM 7644 HB3 TRP C 82    | -45.573 | 20.063 | 8.692  | 1.00 | 45.01 | H0   |    |
| ANISOU 7644 HB3 TRP C 82  | 5660    | 6530   | 4910   | -520 | 320   | 1280 | H0 |
| ATOM 7645 HD1 TRP C 82    | -41.899 | 20.345 | 8.895  | 1.00 | 45.04 | H0   |    |
| ANISOU 7645 HD1 TRP C 82  | 5660    | 6660   | 4790   | -860 | 540   | 1100 | H0 |
| ATOM 7646 HE1 TRP C 82    | -41.214 | 21.987 | 10.514 | 1.00 | 45.23 | H0   |    |
| ANISOU 7646 HE1 TRP C 82  | 5780    | 6410   | 4990   | -900 | 590   | 1100 | H0 |
| ATOM 7647 HE3 TRP C 82    | -46.288 | 21.399 | 10.879 | 1.00 | 44.31 | H0   |    |
| ANISOU 7647 HE3 TRP C 82  | 5620    | 6120   | 5100   | -350 | 330   | 1260 | H0 |
| ATOM 7648 HZ2 TRP C 82    | -42.410 | 23.574 | 12.447 | 1.00 | 45.23 | H0   |    |
| ANISOU 7648 HZ2 TRP C 82  | 5920    | 5990   | 5270   | -710 | 550   | 1140 | H0 |
| ATOM 7649 HZ3 TRP C 82    | -46.409 | 22.972 | 12.584 | 1.00 | 44.73 | H0   |    |
| ANISOU 7649 HZ3 TRP C 82  | 5770    | 5860   | 5360   | -240 | 350   | 1250 | H0 |
| ATOM 7650 HH2 TRP C 82    | -44.503 | 24.042 | 13.355 | 1.00 | 45.16 | H0   |    |
| ANISOU 7650 HH2 TRP C 82  | 5940    | 5770   | 5450   | -430 | 450   | 1190 | H0 |
| ATOM 7651 N VAL C 83      | -44.357 | 18.255 | 11.821 | 1.00 | 41.39 | N0   |    |
| ANISOU 7651 N VAL C 83    | 5040    | 6050   | 4630   | -440 | 450   | 860  | N0 |
| ATOM 7652 CA VAL C 83     | -44.687 | 18.432 | 13.265 | 1.00 | 40.50 | C0   |    |
| ANISOU 7652 CA VAL C 83   | 4910    | 5820   | 4650   | -360 | 460   | 800  | C0 |
| ATOM 7653 C VAL C 83      | -43.686 | 19.423 | 13.846 | 1.00 | 40.14 | C0   |    |
| ANISOU 7653 C VAL C 83    | 4920    | 5670   | 4660   | -420 | 520   | 780  | C0 |
| ATOM 7654 O VAL C 83      | -42.507 | 19.398 | 13.495 | 1.00 | 40.16 | O0   |    |
| ANISOU 7654 O VAL C 83    | 4920    | 5750   | 4590   | -530 | 570   | 750  | O0 |
| ATOM 7655 CB VAL C 83     | -44.729 | 17.093 | 14.034 | 1.00 | 39.72 | C0   |    |
| ANISOU 7655 CB VAL C 83   | 4740    | 5780   | 4570   | -320 | 460   | 660  | C0 |
| ATOM 7656 CG1 VAL C 83    | -45.626 | 16.080 | 13.341 | 1.00 | 39.70 | C0   |    |
| ANISOU 7656 CG1 VAL C 83  | 4700    | 5890   | 4500   | -290 | 400   | 670  | C0 |
| ATOM 7657 CG2 VAL C 83    | -43.351 | 16.498 | 14.272 | 1.00 | 39.98 | C0   |    |
| ANISOU 7657 CG2 VAL C 83  | 4750    | 5880   | 4560   | -380 | 510   | 540  | C0 |
| ATOM 7658 H VAL C 83      | -43.482 | 18.049 | 11.669 | 1.00 | 41.32 | H0   |    |
| ANISOU 7658 H VAL C 83    | 5020    | 6110   | 4580   | -510 | 490   | 810  | H0 |
| ATOM 7659 HA VAL C 83     | -45.571 | 18.832 | 13.317 | 1.00 | 40.81 | H0   |    |
| ANISOU 7659 HA VAL C 83   | 4970    | 5800   | 4740   | -290 | 430   | 860  | H0 |
| ATOM 7660 HB VAL C 83     | -45.126 | 17.281 | 14.920 | 1.00 | 39.43 | H0   |    |
| ANISOU 7660 HB VAL C 83   | 4700    | 5670   | 4610   | -260 | 470   | 640  | H0 |
| ATOM 7661 HG11 VAL C 83   | -46.482 | 16.494 | 13.132 | 1.00 | 40.13 | H0   |    |
| ANISOU 7661 HG11 VAL C 83 | 4760    | 5910   | 4570   | -250 | 370   | 760  | H0 |
| ATOM 7662 HG12 VAL C 83   | -45.770 | 15.318 | 13.928 | 1.00 | 38.94 | H0   |    |
| ANISOU 7662 HG12 VAL C 83 | 4580    | 5800   | 4420   | -260 | 390   | 600  | H0 |
| ATOM 7663 HG13 VAL C 83   | -45.203 | 15.779 | 12.518 | 1.00 | 39.97 | H0   |    |
| ANISOU 7663 HG13 VAL C 83 | 4740    | 6000   | 4450   | -340 | 400   | 680  | H0 |
| ATOM 7664 HG21 VAL C 83   | -42.815 | 16.585 | 13.464 | 1.00 | 40.31 | H0   |    |
| ANISOU 7664 HG21 VAL C 83 | 4800    | 5990   | 4520   | -440 | 530   | 560  | H0 |
| ATOM 7665 HG22 VAL C 83   | -43.438 | 15.556 | 14.501 | 1.00 | 39.10 | H0   |    |
| ANISOU 7665 HG22 VAL C 83 | 4610    | 5820   | 4430   | -350 | 500   | 460  | H0 |

|                           |         |        |        |       |       |     |    |
|---------------------------|---------|--------|--------|-------|-------|-----|----|
| ATOM 7666 HG23 VAL C 83   | -42.914 | 16.969 | 15.003 | 1.00  | 39.63 |     | H0 |
| ANISOU 7666 HG23 VAL C 83 | 4720    | 5770   | 4570   | -390  | 550   | 510 | H0 |
| ATOM 7667 N PRO C 84      | -44.135 | 20.347 | 14.725 | 1.00  | 39.90 |     | N0 |
| ANISOU 7667 N PRO C 84    | 4940    | 5480   | 4740   | -360  | 520   | 810 | N0 |
| ATOM 7668 CA PRO C 84     | -43.233 | 21.311 | 15.348 | 1.00  | 40.15 |     | C0 |
| ANISOU 7668 CA PRO C 84   | 5040    | 5400   | 4820   | -430  | 570   | 790 | C0 |
| ATOM 7669 C PRO C 84      | -42.124 | 20.603 | 16.142 | 1.00  | 38.55 |     | C0 |
| ANISOU 7669 C PRO C 84    | 4770    | 5260   | 4610   | -490  | 630   | 640 | C0 |
| ATOM 7670 O PRO C 84      | -42.382 | 19.579 | 16.748 | 1.00  | 37.72 |     | O0 |
| ANISOU 7670 O PRO C 84    | 4600    | 5210   | 4520   | -420  | 620   | 550 | O0 |
| ATOM 7671 CB PRO C 84     | -44.142 | 22.167 | 16.248 | 1.00  | 40.64 |     | C0 |
| ANISOU 7671 CB PRO C 84   | 5160    | 5280   | 5010   | -320  | 550   | 810 | C0 |
| ATOM 7672 CG PRO C 84     | -45.395 | 21.336 | 16.436 | 1.00  | 40.17 |     | C0 |
| ANISOU 7672 CG PRO C 84   | 5010    | 5280   | 4970   | -190  | 510   | 790 | C0 |
| ATOM 7673 CD PRO C 84     | -45.525 | 20.505 | 15.177 | 1.00  | 40.15 |     | C0 |
| ANISOU 7673 CD PRO C 84   | 4960    | 5440   | 4850   | -220  | 480   | 840 | C0 |
| ATOM 7674 HA PRO C 84     | -42.833 | 21.884 | 14.647 | 1.00  | 41.04 |     | H0 |
| ANISOU 7674 HA PRO C 84   | 5210    | 5500   | 4890   | -510  | 580   | 860 | H0 |
| ATOM 7675 HB2 PRO C 84    | -43.712 | 22.347 | 17.110 | 1.00  | 40.36 |     | H0 |
| ANISOU 7675 HB2 PRO C 84  | 5130    | 5190   | 5020   | -330  | 590   | 740 | H0 |
| ATOM 7676 HB3 PRO C 84    | -44.354 | 23.022 | 15.816 | 1.00  | 41.74 |     | H0 |
| ANISOU 7676 HB3 PRO C 84  | 5370    | 5330   | 5160   | -320  | 530   | 910 | H0 |
| ATOM 7677 HG2 PRO C 84    | -45.313 | 20.759 | 17.223 | 1.00  | 39.22 |     | H0 |
| ANISOU 7677 HG2 PRO C 84  | 4840    | 5190   | 4870   | -170  | 530   | 700 | H0 |
| ATOM 7678 HG3 PRO C 84    | -46.178 | 21.913 | 16.550 | 1.00  | 40.72 |     | H0 |
| ANISOU 7678 HG3 PRO C 84  | 5110    | 5270   | 5090   | -100  | 480   | 850 | H0 |
| ATOM 7679 HD2 PRO C 84    | -45.931 | 19.640 | 15.372 | 1.00  | 39.34 |     | H0 |
| ANISOU 7679 HD2 PRO C 84  | 4800    | 5410   | 4740   | -190  | 460   | 790 | H0 |
| ATOM 7680 HD3 PRO C 84    | -46.062 | 20.964 | 14.505 | 1.00  | 40.94 |     | H0 |
| ANISOU 7680 HD3 PRO C 84  | 5100    | 5520   | 4940   | -200  | 440   | 940 | H0 |
| ATOM 7681 N ASP C 85      | -40.916 | 21.160 | 16.083 | 1.00  | 38.66 |     | N0 |
| ANISOU 7681 N ASP C 85    | 4810    | 5280   | 4590   | -610  | 680   | 630 | N0 |
| ATOM 7682 CA ASP C 85     | -39.696 | 20.640 | 16.755 | 1.00  | 38.20 |     | C0 |
| ANISOU 7682 CA ASP C 85   | 4690    | 5310   | 4520   | -680  | 730   | 490 | C0 |
| ATOM 7683 C ASP C 85      | -39.688 | 21.120 | 18.215 | 1.00  | 37.85 |     | C0 |
| ANISOU 7683 C ASP C 85    | 4670    | 5120   | 4580   | -640  | 740   | 420 | C0 |
| ATOM 7684 O ASP C 85      | -38.732 | 21.813 | 18.606 | 1.00  | 38.33 |     | O0 |
| ANISOU 7684 O ASP C 85    | 4760    | 5150   | 4650   | -750  | 780   | 400 | O0 |
| ATOM 7685 CB ASP C 85     | -38.438 | 21.080 | 15.998 | 1.00  | 38.86 |     | C0 |
| ANISOU 7685 CB ASP C 85   | 4770    | 5490   | 4510   | -840  | 780   | 510 | C0 |
| ATOM 7686 CG ASP C 85     | -38.249 | 22.588 | 15.945 | 1.00  | 40.10 |     | C0 |
| ANISOU 7686 CG ASP C 85   | 5050    | 5500   | 4690   | -950  | 790   | 610 | C0 |
| ATOM 7687 OD1 ASP C 85    | -39.267 | 23.312 | 16.039 | 1.00  | 40.17 |     | O0 |
| ANISOU 7687 OD1 ASP C 85  | 5160    | 5330   | 4770   | -870  | 750   | 700 | O0 |
| ATOM 7688 OD2 ASP C 85    | -37.086 | 23.032 | 15.826 | 1.00  | 40.57 |     | O0 |
| ANISOU 7688 OD2 ASP C 85  | 5110    | 5610   | 4700   | -1110 | 840   | 600 | O0 |
| ATOM 7689 H ASP C 85      | -40.765 | 21.923 | 15.610 | 1.00  | 39.78 |     | H0 |
| ANISOU 7689 H ASP C 85    | 5020    | 5380   | 4720   | -680  | 680   | 700 | H0 |
| ATOM 7690 HA ASP C 85     | -39.734 | 19.654 | 16.747 | 1.00  | 37.34 |     | H0 |
| ANISOU 7690 HA ASP C 85   | 4510    | 5290   | 4380   | -630  | 720   | 420 | H0 |
| ATOM 7691 HB2 ASP C 85    | -37.651 | 20.685 | 16.423 | 1.00  | 38.61 |     | H0 |
| ANISOU 7691 HB2 ASP C 85  | 4680    | 5530   | 4460   | -870  | 800   | 410 | H0 |
| ATOM 7692 HB3 ASP C 85    | -38.488 | 20.745 | 15.079 | 1.00  | 39.21 |     | H0 |
| ANISOU 7692 HB3 ASP C 85  | 4790    | 5630   | 4470   | -860  | 770   | 540 | H0 |

|                           |         |        |        |      |       |      |    |
|---------------------------|---------|--------|--------|------|-------|------|----|
| ATOM 7693 N LEU C 86      | -40.716 | 20.770 | 18.992 | 1.00 | 37.15 | N0   |    |
| ANISOU 7693 N LEU C 86    | 4580    | 4970   | 4570   | -510 | 720   | 390  | N0 |
| ATOM 7694 CA LEU C 86     | -40.836 | 21.185 | 20.415 | 1.00 | 37.48 | C0   |    |
| ANISOU 7694 CA LEU C 86   | 4640    | 4890   | 4710   | -470 | 730   | 320  | C0 |
| ATOM 7695 C LEU C 86      | -39.898 | 20.330 | 21.267 | 1.00 | 36.49 | C0   |    |
| ANISOU 7695 C LEU C 86    | 4450    | 4850   | 4570   | -490 | 750   | 190  | C0 |
| ATOM 7696 O LEU C 86      | -39.836 | 19.110 | 21.047 | 1.00 | 36.04 | O0   |    |
| ANISOU 7696 O LEU C 86    | 4320    | 4920   | 4460   | -460 | 730   | 140  | O0 |
| ATOM 7697 CB LEU C 86     | -42.283 | 21.032 | 20.892 | 1.00 | 37.09 | C0   |    |
| ANISOU 7697 CB LEU C 86   | 4590    | 4780   | 4720   | -320 | 700   | 340  | C0 |
| ATOM 7698 CG LEU C 86     | -43.320 | 21.874 | 20.151 | 1.00 | 38.57 | C0   |    |
| ANISOU 7698 CG LEU C 86   | 4840    | 4880   | 4940   | -260 | 660   | 470  | C0 |
| ATOM 7699 CD1 LEU C 86    | -44.650 | 21.833 | 20.881 | 1.00 | 38.70 | C0   |    |
| ANISOU 7699 CD1 LEU C 86  | 4830    | 4850   | 5020   | -110 | 640   | 450  | C0 |
| ATOM 7700 CD2 LEU C 86    | -42.853 | 23.314 | 19.978 | 1.00 | 40.12 | C0   |    |
| ANISOU 7700 CD2 LEU C 86  | 5160    | 4930   | 5160   | -330 | 680   | 540  | C0 |
| ATOM 7701 H LEU C 86      | -41.397 | 20.242 | 18.701 | 1.00 | 36.92 | H0   |    |
| ANISOU 7701 H LEU C 86    | 4520    | 4980   | 4530   | -450 | 690   | 410  | H0 |
| ATOM 7702 HA LEU C 86     | -40.562 | 22.127 | 20.489 | 1.00 | 38.15 | H0   |    |
| ANISOU 7702 HA LEU C 86   | 4800    | 4880   | 4820   | -520 | 750   | 360  | H0 |
| ATOM 7703 HB2 LEU C 86    | -42.534 | 20.091 | 20.811 | 1.00 | 36.48 | H0   |    |
| ANISOU 7703 HB2 LEU C 86  | 4450    | 4790   | 4610   | -290 | 680   | 310  | H0 |
| ATOM 7704 HB3 LEU C 86    | -42.318 | 21.265 | 21.842 | 1.00 | 37.05 | H0   |    |
| ANISOU 7704 HB3 LEU C 86  | 4600    | 4710   | 4770   | -300 | 710   | 280  | H0 |
| ATOM 7705 HG LEU C 86     | -43.450 | 21.481 | 19.253 | 1.00 | 38.61 | H0   |    |
| ANISOU 7705 HG LEU C 86   | 4820    | 4970   | 4880   | -270 | 640   | 520  | H0 |
| ATOM 7706 HD11 LEU C 86   | -44.949 | 20.911 | 20.961 | 1.00 | 37.84 | H0   |    |
| ANISOU 7706 HD11 LEU C 86 | 4650    | 4840   | 4890   | -90  | 630   | 420  | H0 |
| ATOM 7707 HD12 LEU C 86   | -45.310 | 22.345 | 20.382 | 1.00 | 39.41 | H0   |    |
| ANISOU 7707 HD12 LEU C 86 | 4950    | 4890   | 5130   | -60  | 610   | 530  | H0 |
| ATOM 7708 HD13 LEU C 86   | -44.545 | 22.218 | 21.769 | 1.00 | 38.67 | H0   |    |
| ANISOU 7708 HD13 LEU C 86 | 4850    | 4770   | 5070   | -100 | 670   | 400  | H0 |
| ATOM 7709 HD21 LEU C 86   | -42.442 | 23.624 | 20.803 | 1.00 | 40.04 | H0   |    |
| ANISOU 7709 HD21 LEU C 86 | 5170    | 4850   | 5190   | -350 | 700   | 470  | H0 |
| ATOM 7710 HD22 LEU C 86   | -43.615 | 23.880 | 19.763 | 1.00 | 40.79 | H0   |    |
| ANISOU 7710 HD22 LEU C 86 | 5290    | 4930   | 5280   | -250 | 650   | 600  | H0 |
| ATOM 7711 HD23 LEU C 86   | -42.203 | 23.361 | 19.255 | 1.00 | 40.42 | H0   |    |
| ANISOU 7711 HD23 LEU C 86 | 5210    | 5010   | 5140   | -420 | 680   | 570  | H0 |
| ATOM 7712 N ALA C 87      | -39.198 | 20.960 | 22.205 | 1.00 | 37.02 | N0   |    |
| ANISOU 7712 N ALA C 87    | 4540    | 4850   | 4670   | -550 | 780   | 130  | N0 |
| ATOM 7713 CA ALA C 87     | -38.383 | 20.284 | 23.233 | 1.00 | 36.87 | C0   |    |
| ANISOU 7713 CA ALA C 87   | 4460    | 4890   | 4650   | -560 | 790   | 0    | C0 |
| ATOM 7714 C ALA C 87      | -38.770 | 20.829 | 24.607 | 1.00 | 37.48 | C0   |    |
| ANISOU 7714 C ALA C 87    | 4590    | 4840   | 4810   | -530 | 800   | -50  | C0 |
| ATOM 7715 O ALA C 87      | -39.012 | 22.041 | 24.719 | 1.00 | 38.62 | O0   |    |
| ANISOU 7715 O ALA C 87    | 4830    | 4840   | 5010   | -550 | 820   | -10  | O0 |
| ATOM 7716 CB ALA C 87     | -36.919 | 20.484 | 22.946 | 1.00 | 37.61 | C0   |    |
| ANISOU 7716 CB ALA C 87   | 4520    | 5080   | 4690   | -700 | 830   | -40  | C0 |
| ATOM 7717 H ALA C 87      | -39.168 | 21.868 | 22.280 | 1.00 | 37.81 | H0   |    |
| ANISOU 7717 H ALA C 87    | 4710    | 4850   | 4810   | -590 | 800   | 160  | H0 |
| ATOM 7718 HA ALA C 87     | -38.582 | 19.319 | 23.211 | 1.00 | 36.20 | H0   |    |
| ANISOU 7718 HA ALA C 87   | 4330    | 4880   | 4540   | -510 | 770   | -40  | H0 |
| ATOM 7719 HB1 ALA C 87    | -36.390 | 20.037 | 23.628 | 1.00 | 37.18 | H0   |    |
| ANISOU 7719 HB1 ALA C 87  | 4420    | 5070   | 4630   | -700 | 820   | -130 | H0 |

|                          |         |        |        |      |       |      |    |
|--------------------------|---------|--------|--------|------|-------|------|----|
| ATOM 7720 HB2 ALA C 87   | -36.704 | 20.110 | 22.075 | 1.00 | 37.69 | H0   |    |
| ANISOU 7720 HB2 ALA C 87 | 4490    | 5190   | 4640   | -710 | 820   | -20  | H0 |
| ATOM 7721 HB3 ALA C 87   | -36.713 | 21.434 | 22.950 | 1.00 | 38.37 | H0   |    |
| ANISOU 7721 HB3 ALA C 87 | 4680    | 5100   | 4800   | -770 | 850   | -10  | H0 |
| ATOM 7722 N ALA C 88     | -38.849 | 19.945 | 25.601 | 1.00 | 37.59 | N0   |    |
| ANISOU 7722 N ALA C 88   | 4560    | 4890   | 4830   | -470 | 790   | -140 | N0 |
| ATOM 7723 CA ALA C 88    | -38.904 | 20.299 | 27.033 | 1.00 | 38.08 | C0   |    |
| ANISOU 7723 CA ALA C 88  | 4660    | 4870   | 4940   | -460 | 800   | -220 | C0 |
| ATOM 7724 C ALA C 88     | -37.480 | 20.626 | 27.485 | 1.00 | 39.43 | C0   |    |
| ANISOU 7724 C ALA C 88   | 4820    | 5070   | 5100   | -570 | 820   | -290 | C0 |
| ATOM 7725 O ALA C 88     | -36.662 | 19.698 | 27.631 | 1.00 | 39.55 | O0   |    |
| ANISOU 7725 O ALA C 88   | 4760    | 5210   | 5060   | -590 | 800   | -360 | O0 |
| ATOM 7726 CB ALA C 88    | -39.506 | 19.174 | 27.823 | 1.00 | 37.24 | C0   |    |
| ANISOU 7726 CB ALA C 88  | 4510    | 4810   | 4830   | -380 | 770   | -280 | C0 |
| ATOM 7727 H ALA C 88     | -38.871 | 19.045 | 25.464 | 1.00 | 36.88 | H0   |    |
| ANISOU 7727 H ALA C 88   | 4420    | 4880   | 4710   | -440 | 760   | -170 | H0 |
| ATOM 7728 HA ALA C 88    | -39.466 | 21.100 | 27.138 | 1.00 | 38.69 | H0   |    |
| ANISOU 7728 HA ALA C 88  | 4790    | 4840   | 5070   | -440 | 820   | -190 | H0 |
| ATOM 7729 HB1 ALA C 88   | -39.458 | 19.386 | 28.769 | 1.00 | 37.23 | H0   |    |
| ANISOU 7729 HB1 ALA C 88 | 4530    | 4770   | 4850   | -380 | 780   | -330 | H0 |
| ATOM 7730 HB2 ALA C 88   | -40.435 | 19.055 | 27.565 | 1.00 | 37.09 | H0   |    |
| ANISOU 7730 HB2 ALA C 88 | 4490    | 4780   | 4820   | -320 | 760   | -230 | H0 |
| ATOM 7731 HB3 ALA C 88   | -39.015 | 18.354 | 27.649 | 1.00 | 36.78 | H0   |    |
| ANISOU 7731 HB3 ALA C 88 | 4410    | 4840   | 4730   | -390 | 750   | -310 | H0 |
| ATOM 7732 N TYR C 89     | -37.203 | 21.911 | 27.684 | 1.00 | 40.95 | N0   |    |
| ANISOU 7732 N TYR C 89   | 5090    | 5140   | 5330   | -650 | 850   | -280 | N0 |
| ATOM 7733 CA TYR C 89    | -35.852 | 22.474 | 27.923 | 1.00 | 42.77 | C0   |    |
| ANISOU 7733 CA TYR C 89  | 5320    | 5400   | 5530   | -790 | 870   | -330 | C0 |
| ATOM 7734 C TYR C 89     | -35.202 | 21.850 | 29.170 | 1.00 | 42.37 | C0   |    |
| ANISOU 7734 C TYR C 89   | 5210    | 5410   | 5470   | -800 | 860   | -450 | C0 |
| ATOM 7735 O TYR C 89     | -33.961 | 21.698 | 29.168 | 1.00 | 43.18 | O0   |    |
| ANISOU 7735 O TYR C 89   | 5250    | 5630   | 5530   | -890 | 860   | -500 | O0 |
| ATOM 7736 CB TYR C 89    | -35.954 | 24.001 | 27.995 | 1.00 | 45.02 | C0   |    |
| ANISOU 7736 CB TYR C 89  | 5740    | 5500   | 5870   | -870 | 900   | -280 | C0 |
| ATOM 7737 CG TYR C 89    | -36.425 | 24.686 | 26.732 | 1.00 | 46.62 | C0   |    |
| ANISOU 7737 CG TYR C 89  | 6010    | 5630   | 6070   | -880 | 900   | -150 | C0 |
| ATOM 7738 CD1 TYR C 89   | -36.398 | 24.050 | 25.498 | 1.00 | 47.00 | C0   |    |
| ANISOU 7738 CD1 TYR C 89 | 5990    | 5810   | 6060   | -880 | 890   | -80  | C0 |
| ATOM 7739 CD2 TYR C 89   | -36.843 | 26.008 | 26.759 | 1.00 | 48.68 | C0   |    |
| ANISOU 7739 CD2 TYR C 89 | 6420    | 5690   | 6390   | -900 | 900   | -90  | C0 |
| ATOM 7740 CE1 TYR C 89   | -36.801 | 24.692 | 24.338 | 1.00 | 48.17 | C0   |    |
| ANISOU 7740 CE1 TYR C 89 | 6210    | 5890   | 6200   | -900 | 880   | 50   | C0 |
| ATOM 7741 CE2 TYR C 89   | -37.245 | 26.667 | 25.607 | 1.00 | 50.18 | C0   |    |
| ANISOU 7741 CE2 TYR C 89 | 6690    | 5800   | 6580   | -910 | 890   | 40   | C0 |
| ATOM 7742 CZ TYR C 89    | -37.226 | 26.007 | 24.391 | 1.00 | 49.99 | C0   |    |
| ANISOU 7742 CZ TYR C 89  | 6590    | 5910   | 6480   | -920 | 880   | 110  | C0 |
| ATOM 7743 OH TYR C 89    | -37.612 | 26.653 | 23.250 | 1.00 | 51.95 | O0   |    |
| ANISOU 7743 OH TYR C 89  | 6930    | 6090   | 6720   | -940 | 860   | 250  | O0 |
| ATOM 7744 H TYR C 89     | -37.850 | 22.553 | 27.698 | 1.00 | 41.48 | H0   |    |
| ANISOU 7744 H TYR C 89   | 5220    | 5100   | 5440   | -620 | 860   | -240 | H0 |
| ATOM 7745 HA TYR C 89    | -35.284 | 22.241 | 27.147 | 1.00 | 42.93 | H0   |    |
| ANISOU 7745 HA TYR C 89  | 5290    | 5510   | 5510   | -850 | 880   | -300 | H0 |
| ATOM 7746 HB2 TYR C 89   | -36.565 | 24.233 | 28.725 | 1.00 | 44.91 | H0   |    |
| ANISOU 7746 HB2 TYR C 89 | 5770    | 5390   | 5900   | -800 | 900   | -310 | H0 |

|                           |         |        |        |      |       |      |    |
|---------------------------|---------|--------|--------|------|-------|------|----|
| ATOM 7747 HB3 TYR C 89    | -35.070 | 24.352 | 28.228 | 1.00 | 45.55 | H0   |    |
| ANISOU 7747 HB3 TYR C 89  | 5810    | 5590   | 5920   | -980 | 910   | -320 | H0 |
| ATOM 7748 HD1 TYR C 89    | -36.109 | 23.156 | 25.444 | 1.00 | 46.20 | H0   |    |
| ANISOU 7748 HD1 TYR C 89  | 5800    | 5830   | 5920   | -860 | 880   | -120 | H0 |
| ATOM 7749 HD2 TYR C 89    | -36.858 | 26.469 | 27.581 | 1.00 | 48.95 | H0   |    |
| ANISOU 7749 HD2 TYR C 89  | 6510    | 5630   | 6460   | -900 | 910   | -150 | H0 |
| ATOM 7750 HE1 TYR C 89    | -36.781 | 24.236 | 23.513 | 1.00 | 48.05 | H0   |    |
| ANISOU 7750 HE1 TYR C 89  | 6150    | 5970   | 6130   | -900 | 880   | 90   | H0 |
| ATOM 7751 HE2 TYR C 89    | -37.534 | 27.564 | 25.652 | 1.00 | 51.02 | H0   |    |
| ANISOU 7751 HE2 TYR C 89  | 6910    | 5750   | 6720   | -910 | 880   | 70   | H0 |
| ATOM 7752 N ASN C 90      | -35.983 | 21.483 | 30.193 | 1.00 | 41.09 | N0   |    |
| ANISOU 7752 N ASN C 90    | 5070    | 5200   | 5340   | -700 | 850   | -500 | N0 |
| ATOM 7753 CA ASN C 90     | -35.447 | 20.956 | 31.480 | 1.00 | 41.11 | C0   |    |
| ANISOU 7753 CA ASN C 90   | 5040    | 5260   | 5330   | -710 | 830   | -610 | C0 |
| ATOM 7754 C ASN C 90      | -35.729 | 19.450 | 31.602 | 1.00 | 40.12 | C0   |    |
| ANISOU 7754 C ASN C 90    | 4850    | 5240   | 5160   | -610 | 780   | -630 | C0 |
| ATOM 7755 O ASN C 90      | -35.608 | 18.921 | 32.725 | 1.00 | 40.29 | O0   |    |
| ANISOU 7755 O ASN C 90    | 4860    | 5280   | 5170   | -600 | 750   | -700 | O0 |
| ATOM 7756 CB ASN C 90     | -35.968 | 21.752 | 32.685 | 1.00 | 41.77 | C0   |    |
| ANISOU 7756 CB ASN C 90   | 5210    | 5200   | 5460   | -700 | 850   | -650 | C0 |
| ATOM 7757 CG ASN C 90     | -37.473 | 21.705 | 32.844 | 1.00 | 41.82 | C0   |    |
| ANISOU 7757 CG ASN C 90   | 5260    | 5130   | 5500   | -580 | 860   | -620 | C0 |
| ATOM 7758 OD1 ASN C 90    | -38.215 | 22.013 | 31.914 | 1.00 | 42.02 | O0   |    |
| ANISOU 7758 OD1 ASN C 90  | 5300    | 5110   | 5550   | -530 | 870   | -530 | O0 |
| ATOM 7759 ND2 ASN C 90    | -37.934 | 21.337 | 34.028 | 1.00 | 42.39 | N0   |    |
| ANISOU 7759 ND2 ASN C 90  | 5330    | 5210   | 5570   | -530 | 860   | -690 | N0 |
| ATOM 7760 H ASN C 90      | -36.891 | 21.534 | 30.163 | 1.00 | 41.14 | H0   |    |
| ANISOU 7760 H ASN C 90    | 5110    | 5150   | 5380   | -630 | 850   | -460 | H0 |
| ATOM 7761 HA ASN C 90     | -34.469 | 21.075 | 31.466 | 1.00 | 41.52 | H0   |    |
| ANISOU 7761 HA ASN C 90   | 5060    | 5370   | 5350   | -790 | 830   | -640 | H0 |
| ATOM 7762 HB2 ASN C 90    | -35.551 | 21.400 | 33.497 | 1.00 | 41.65 | H0   |    |
| ANISOU 7762 HB2 ASN C 90  | 5180    | 5230   | 5420   | -720 | 830   | -720 | H0 |
| ATOM 7763 HB3 ASN C 90    | -35.691 | 22.685 | 32.586 | 1.00 | 42.66 | H0   |    |
| ANISOU 7763 HB3 ASN C 90  | 5380    | 5240   | 5590   | -770 | 870   | -640 | H0 |
| ATOM 7764 HD21 ASN C 90   | -38.686 | 20.874 | 34.085 | 1.00 | 41.70 | H0   |    |
| ANISOU 7764 HD21 ASN C 90 | 5230    | 5140   | 5480   | -470 | 850   | -670 | H0 |
| ATOM 7765 HD22 ASN C 90   | -37.493 | 21.555 | 34.763 | 1.00 | 42.37 | H0   |    |
| ANISOU 7765 HD22 ASN C 90 | 5350    | 5190   | 5560   | -580 | 860   | -750 | H0 |
| ATOM 7766 N ALA C 91      | -36.069 | 18.774 | 30.499 | 1.00 | 39.20 | N0   |    |
| ANISOU 7766 N ALA C 91    | 4690    | 5180   | 5020   | -560 | 760   | -570 | N0 |
| ATOM 7767 CA ALA C 91     | -36.151 | 17.296 | 30.433 | 1.00 | 38.58 | C0   |    |
| ANISOU 7767 CA ALA C 91   | 4560    | 5200   | 4900   | -490 | 700   | -590 | C0 |
| ATOM 7768 C ALA C 91      | -34.734 | 16.725 | 30.523 | 1.00 | 38.42 | C0   |    |
| ANISOU 7768 C ALA C 91    | 4470    | 5300   | 4830   | -520 | 670   | -670 | C0 |
| ATOM 7769 O ALA C 91      | -33.814 | 17.344 | 29.948 | 1.00 | 39.54 | O0   |    |
| ANISOU 7769 O ALA C 91    | 4570    | 5500   | 4960   | -600 | 700   | -670 | O0 |
| ATOM 7770 CB ALA C 91     | -36.841 | 16.849 | 29.170 | 1.00 | 38.64 | C0   |    |
| ANISOU 7770 CB ALA C 91   | 4560    | 5230   | 4890   | -430 | 690   | -510 | C0 |
| ATOM 7771 H ALA C 91      | -36.275 | 19.170 | 29.706 | 1.00 | 39.62 | H0   |    |
| ANISOU 7771 H ALA C 91    | 4760    | 5210   | 5080   | -570 | 780   | -510 | H0 |
| ATOM 7772 HA ALA C 91     | -36.669 | 16.977 | 31.209 | 1.00 | 38.20 | H0   |    |
| ANISOU 7772 HA ALA C 91   | 4540    | 5120   | 4860   | -450 | 680   | -610 | H0 |
| ATOM 7773 HB1 ALA C 91    | -36.870 | 15.878 | 29.142 | 1.00 | 38.09 | H0   |    |
| ANISOU 7773 HB1 ALA C 91  | 4470    | 5220   | 4790   | -390 | 650   | -530 | H0 |

|                           |         |        |        |      |       |      |    |
|---------------------------|---------|--------|--------|------|-------|------|----|
| ATOM 7774 HB2 ALA C 91    | -37.746 | 17.200 | 29.153 | 1.00 | 38.48 | H0   |    |
| ANISOU 7774 HB2 ALA C 91  | 4570    | 5150   | 4900   | -410 | 710   | -460 | H0 |
| ATOM 7775 HB3 ALA C 91    | -36.351 | 17.179 | 28.397 | 1.00 | 38.93 | H0   |    |
| ANISOU 7775 HB3 ALA C 91  | 4570    | 5310   | 4910   | -470 | 710   | -490 | H0 |
| ATOM 7776 N ILE C 92      | -34.570 | 15.608 | 31.237 | 1.00 | 37.32 | N0   |    |
| ANISOU 7776 N ILE C 92    | 4310    | 5210   | 4660   | -460 | 600   | -730 | N0 |
| ATOM 7777 CA ILE C 92     | -33.264 | 14.916 | 31.450 | 1.00 | 37.53 | C0   |    |
| ANISOU 7777 CA ILE C 92   | 4260    | 5360   | 4640   | -450 | 550   | -810 | C0 |
| ATOM 7778 C ILE C 92      | -33.359 | 13.485 | 30.910 | 1.00 | 37.27 | C0   |    |
| ANISOU 7778 C ILE C 92    | 4220    | 5380   | 4560   | -340 | 470   | -820 | C0 |
| ATOM 7779 O ILE C 92      | -32.412 | 12.712 | 31.128 | 1.00 | 36.76 | O0   |    |
| ANISOU 7779 O ILE C 92    | 4100    | 5410   | 4460   | -300 | 410   | -900 | O0 |
| ATOM 7780 CB ILE C 92     | -32.858 | 14.951 | 32.939 | 1.00 | 37.51 | C0   |    |
| ANISOU 7780 CB ILE C 92   | 4280    | 5340   | 4630   | -470 | 520   | -880 | C0 |
| ATOM 7781 CG1 ILE C 92    | -33.870 | 14.231 | 33.837 | 1.00 | 36.78 | C0   |    |
| ANISOU 7781 CG1 ILE C 92  | 4270    | 5170   | 4540   | -410 | 470   | -870 | C0 |
| ATOM 7782 CG2 ILE C 92    | -32.623 | 16.386 | 33.386 | 1.00 | 37.98 | C0   |    |
| ANISOU 7782 CG2 ILE C 92  | 4360    | 5340   | 4730   | -590 | 580   | -890 | C0 |
| ATOM 7783 CD1 ILE C 92    | -33.488 | 14.198 | 35.308 | 1.00 | 37.06 | C0   |    |
| ANISOU 7783 CD1 ILE C 92  | 4330    | 5200   | 4550   | -440 | 430   | -940 | C0 |
| ATOM 7784 H ILE C 92      | -35.265 | 15.202 | 31.662 | 1.00 | 37.04 | H0   |    |
| ANISOU 7784 H ILE C 92    | 4310    | 5130   | 4630   | -420 | 580   | -720 | H0 |
| ATOM 7785 HA ILE C 92     | -32.582 | 15.388 | 30.940 | 1.00 | 38.07 | H0   |    |
| ANISOU 7785 HA ILE C 92   | 4280    | 5480   | 4700   | -500 | 580   | -820 | H0 |
| ATOM 7786 HB ILE C 92     | -31.997 | 14.470 | 33.022 | 1.00 | 37.80 | H0   |    |
| ANISOU 7786 HB ILE C 92   | 4260    | 5460   | 4640   | -460 | 470   | -940 | H0 |
| ATOM 7787 HG12 ILE C 92   | -34.739 | 14.677 | 33.752 | 1.00 | 36.60 | H0   |    |
| ANISOU 7787 HG12 ILE C 92 | 4290    | 5080   | 4540   | -420 | 510   | -830 | H0 |
| ATOM 7788 HG13 ILE C 92   | -33.974 | 13.308 | 33.521 | 1.00 | 36.55 | H0   |    |
| ANISOU 7788 HG13 ILE C 92 | 4240    | 5170   | 4480   | -350 | 420   | -870 | H0 |
| ATOM 7789 HG21 ILE C 92   | -32.009 | 16.823 | 32.770 | 1.00 | 38.52 | H0   |    |
| ANISOU 7789 HG21 ILE C 92 | 4380    | 5460   | 4790   | -640 | 610   | -890 | H0 |
| ATOM 7790 HG22 ILE C 92   | -32.240 | 16.393 | 34.280 | 1.00 | 38.24 | H0   |    |
| ANISOU 7790 HG22 ILE C 92 | 4400    | 5380   | 4750   | -610 | 560   | -940 | H0 |
| ATOM 7791 HG23 ILE C 92   | -33.468 | 16.867 | 33.394 | 1.00 | 37.85 | H0   |    |
| ANISOU 7791 HG23 ILE C 92 | 4400    | 5230   | 4750   | -590 | 620   | -840 | H0 |
| ATOM 7792 HD11 ILE C 92   | -32.550 | 13.953 | 35.395 | 1.00 | 37.42 | H0   |    |
| ANISOU 7792 HD11 ILE C 92 | 4330    | 5310   | 4580   | -440 | 400   | -990 | H0 |
| ATOM 7793 HD12 ILE C 92   | -34.037 | 13.543 | 35.773 | 1.00 | 36.72 | H0   |    |
| ANISOU 7793 HD12 ILE C 92 | 4330    | 5130   | 4490   | -400 | 390   | -930 | H0 |
| ATOM 7794 HD13 ILE C 92   | -33.630 | 15.076 | 35.702 | 1.00 | 37.27 | H0   |    |
| ANISOU 7794 HD13 ILE C 92 | 4380    | 5170   | 4610   | -500 | 490   | -940 | H0 |
| ATOM 7795 N SER C 93      | -34.468 | 13.153 | 30.243 | 1.00 | 37.42 | N0   |    |
| ANISOU 7795 N SER C 93    | 4280    | 5350   | 4580   | -300 | 480   | -750 | N0 |
| ATOM 7796 CA SER C 93     | -34.694 | 11.868 | 29.533 | 1.00 | 37.54 | C0   |    |
| ANISOU 7796 CA SER C 93   | 4300    | 5410   | 4560   | -220 | 410   | -750 | C0 |
| ATOM 7797 C SER C 93      | -35.382 | 12.158 | 28.197 | 1.00 | 38.66 | C0   |    |
| ANISOU 7797 C SER C 93    | 4440    | 5550   | 4700   | -230 | 460   | -670 | C0 |
| ATOM 7798 O SER C 93      | -36.099 | 13.181 | 28.105 | 1.00 | 37.86 | O0   |    |
| ANISOU 7798 O SER C 93    | 4360    | 5380   | 4640   | -280 | 520   | -600 | O0 |
| ATOM 7799 CB SER C 93     | -35.500 | 10.905 | 30.367 | 1.00 | 36.46 | C0   |    |
| ANISOU 7799 CB SER C 93   | 4240    | 5200   | 4410   | -170 | 340   | -750 | C0 |
| ATOM 7800 OG SER C 93     | -36.883 | 11.239 | 30.350 | 1.00 | 35.36 | O0   |    |
| ANISOU 7800 OG SER C 93   | 4160    | 4980   | 4300   | -200 | 380   | -670 | O0 |

|                          |         |        |        |      |       |      |    |
|--------------------------|---------|--------|--------|------|-------|------|----|
| ATOM 7801 H SER C 93     | -35.186 | 13.706 | 30.170 | 1.00 | 37.19 | H0   |    |
| ANISOU 7801 H SER C 93   | 4280    | 5260   | 4590   | -330 | 520   | -700 | H0 |
| ATOM 7802 HA SER C 93    | -33.807 | 11.458 | 29.344 | 1.00 | 37.95 | H0   |    |
| ANISOU 7802 HA SER C 93  | 4300    | 5540   | 4580   | -190 | 380   | -810 | H0 |
| ATOM 7803 HB2 SER C 93   | -35.380 | 9.993  | 30.019 | 1.00 | 36.47 | H0   |    |
| ANISOU 7803 HB2 SER C 93 | 4250    | 5230   | 4380   | -120 | 280   | -770 | H0 |
| ATOM 7804 HB3 SER C 93   | -35.171 | 10.924 | 31.294 | 1.00 | 36.53 | H0   |    |
| ANISOU 7804 HB3 SER C 93 | 4260    | 5200   | 4420   | -180 | 320   | -790 | H0 |
| ATOM 7805 N LYS C 94     | -35.153 | 11.301 | 27.200 | 1.00 | 41.20 | N0   |    |
| ANISOU 7805 N LYS C 94   | 4730    | 5950   | 4970   | -170 | 420   | -690 | N0 |
| ATOM 7806 CA LYS C 94    | -35.902 | 11.304 | 25.915 | 1.00 | 43.00 | C0   |    |
| ANISOU 7806 CA LYS C 94  | 4970    | 6190   | 5180   | -170 | 450   | -620 | C0 |
| ATOM 7807 C LYS C 94     | -37.369 | 11.041 | 26.229 | 1.00 | 42.22 | C0   |    |
| ANISOU 7807 C LYS C 94   | 4950    | 5990   | 5100   | -160 | 420   | -550 | C0 |
| ATOM 7808 O LYS C 94     | -37.674 | 10.297 | 27.156 | 1.00 | 41.52 | O0   |    |
| ANISOU 7808 O LYS C 94   | 4910    | 5850   | 5010   | -130 | 370   | -570 | O0 |
| ATOM 7809 CB LYS C 94    | -35.381 | 10.230 | 24.955 | 1.00 | 44.88 | C0   |    |
| ANISOU 7809 CB LYS C 94  | 5180    | 6520   | 5350   | -100 | 400   | -670 | C0 |
| ATOM 7810 CG LYS C 94    | -33.929 | 10.403 | 24.536 | 1.00 | 47.60 | C0   |    |
| ANISOU 7810 CG LYS C 94  | 5420    | 7010   | 5660   | -110 | 420   | -750 | C0 |
| ATOM 7811 CD LYS C 94    | -33.471 | 9.416  | 23.480 | 1.00 | 49.72 | C0   |    |
| ANISOU 7811 CD LYS C 94  | 5650    | 7390   | 5850   | -30  | 390   | -820 | C0 |
| ATOM 7812 CE LYS C 94    | -33.997 | 9.736  | 22.096 | 1.00 | 50.84 | C0   |    |
| ANISOU 7812 CE LYS C 94  | 5790    | 7570   | 5950   | -70  | 440   | -750 | C0 |
| ATOM 7813 NZ LYS C 94    | -32.941 | 9.571  | 21.070 | 1.00 | 52.85 | N0   |    |
| ANISOU 7813 NZ LYS C 94  | 5940    | 8010   | 6130   | -60  | 470   | -820 | N0 |
| ATOM 7814 H LYS C 94     | -34.521 | 10.647 | 27.256 | 1.00 | 41.27 | H0   |    |
| ANISOU 7814 H LYS C 94   | 4720    | 6010   | 4950   | -130 | 380   | -750 | H0 |
| ATOM 7815 HA LYS C 94    | -35.809 | 12.190 | 25.497 | 1.00 | 43.16 | H0   |    |
| ANISOU 7815 HA LYS C 94  | 4970    | 6220   | 5210   | -230 | 500   | -580 | H0 |
| ATOM 7816 HB2 LYS C 94   | -35.480 | 9.355  | 25.385 | 1.00 | 44.78 | H0   |    |
| ANISOU 7816 HB2 LYS C 94 | 5200    | 6480   | 5320   | -50  | 330   | -710 | H0 |
| ATOM 7817 HB3 LYS C 94   | -35.941 | 10.234 | 24.151 | 1.00 | 44.91 | H0   |    |
| ANISOU 7817 HB3 LYS C 94 | 5190    | 6530   | 5340   | -110 | 410   | -620 | H0 |
| ATOM 7818 HG2 LYS C 94   | -33.806 | 11.314 | 24.195 | 1.00 | 47.74 | H0   |    |
| ANISOU 7818 HG2 LYS C 94 | 5410    | 7050   | 5680   | -180 | 490   | -710 | H0 |
| ATOM 7819 HG3 LYS C 94   | -33.362 | 10.303 | 25.327 | 1.00 | 47.59 | H0   |    |
| ANISOU 7819 HG3 LYS C 94 | 5400    | 7010   | 5670   | -90  | 400   | -810 | H0 |
| ATOM 7820 HD2 LYS C 94   | -32.491 | 9.409  | 23.453 | 1.00 | 50.17 | H0   |    |
| ANISOU 7820 HD2 LYS C 94 | 5630    | 7550   | 5880   | -20  | 400   | -890 | H0 |
| ATOM 7821 HD3 LYS C 94   | -33.772 | 8.517  | 23.732 | 1.00 | 49.34 | H0   |    |
| ANISOU 7821 HD3 LYS C 94 | 5660    | 7290   | 5790   | 40   | 320   | -850 | H0 |
| ATOM 7822 HE2 LYS C 94   | -34.742 | 9.142  | 21.883 | 1.00 | 50.51 | H0   |    |
| ANISOU 7822 HE2 LYS C 94 | 5810    | 7480   | 5900   | -40  | 400   | -720 | H0 |
| ATOM 7823 HE3 LYS C 94   | -34.324 | 10.655 | 22.070 | 1.00 | 50.71 | H0   |    |
| ANISOU 7823 HE3 LYS C 94 | 5780    | 7520   | 5970   | -150 | 490   | -670 | H0 |
| ATOM 7824 HZ1 LYS C 94   | -32.287 | 10.187 | 21.199 | 1.00 | 52.92 | H0   |    |
| ANISOU 7824 HZ1 LYS C 94 | 5890    | 8080   | 6140   | -110 | 510   | -830 | H0 |
| ATOM 7825 HZ2 LYS C 94   | -33.295 | 9.683  | 20.242 | 1.00 | 52.66 | H0   |    |
| ANISOU 7825 HZ2 LYS C 94 | 5930    | 8010   | 6070   | -90  | 490   | -780 | H0 |
| ATOM 7826 HZ3 LYS C 94   | -32.582 | 8.740  | 21.128 | 1.00 | 52.76 | H0   |    |
| ANISOU 7826 HZ3 LYS C 94 | 5920    | 8030   | 6090   | 20   | 420   | -900 | H0 |
| ATOM 7827 N PRO C 95     | -38.317 | 11.657 | 25.491 | 1.00 | 43.06 | N0   |    |
| ANISOU 7827 N PRO C 95   | 5060    | 6070   | 5230   | -180 | 460   | -450 | N0 |

|                          |         |        |        |      |       |      |    |
|--------------------------|---------|--------|--------|------|-------|------|----|
| ATOM 7828 CA PRO C 95    | -39.735 | 11.372 | 25.698 | 1.00 | 42.55 |      | C0 |
| ANISOU 7828 CA PRO C 95  | 5040    | 5950   | 5170   | -170 | 440   | -390 | C0 |
| ATOM 7829 C PRO C 95     | -40.035 | 9.901  | 25.370 | 1.00 | 42.25 |      | C0 |
| ANISOU 7829 C PRO C 95   | 5040    | 5930   | 5080   | -130 | 360   | -410 | C0 |
| ATOM 7830 O PRO C 95     | -39.702 | 9.487  | 24.283 | 1.00 | 44.02 |      | O0 |
| ANISOU 7830 O PRO C 95   | 5250    | 6220   | 5250   | -120 | 340   | -420 | O0 |
| ATOM 7831 CB PRO C 95    | -40.454 | 12.352 | 24.756 | 1.00 | 43.01 |      | C0 |
| ANISOU 7831 CB PRO C 95  | 5090    | 6000   | 5250   | -190 | 490   | -290 | C0 |
| ATOM 7832 CG PRO C 95    | -39.409 | 12.756 | 23.731 | 1.00 | 43.91 |      | C0 |
| ANISOU 7832 CG PRO C 95  | 5160    | 6180   | 5340   | -220 | 530   | -300 | C0 |
| ATOM 7833 CD PRO C 95    | -38.076 | 12.656 | 24.438 | 1.00 | 43.51 |      | C0 |
| ANISOU 7833 CD PRO C 95  | 5080    | 6160   | 5280   | -230 | 530   | -400 | C0 |
| ATOM 7834 HA PRO C 95    | -39.980 | 11.572 | 26.636 | 1.00 | 42.42 |      | H0 |
| ANISOU 7834 HA PRO C 95  | 5050    | 5880   | 5190   | -180 | 450   | -400 | H0 |
| ATOM 7835 HB2 PRO C 95   | -41.219 | 11.919 | 24.319 | 1.00 | 42.97 |      | H0 |
| ANISOU 7835 HB2 PRO C 95 | 5090    | 6000   | 5230   | -180 | 470   | -250 | H0 |
| ATOM 7836 HB3 PRO C 95   | -40.777 | 13.136 | 25.250 | 1.00 | 43.11 |      | H0 |
| ANISOU 7836 HB3 PRO C 95 | 5110    | 5960   | 5310   | -200 | 530   | -270 | H0 |
| ATOM 7837 HG2 PRO C 95   | -39.434 | 12.155 | 22.959 | 1.00 | 43.80 |      | H0 |
| ANISOU 7837 HG2 PRO C 95 | 5140    | 6220   | 5280   | -210 | 500   | -290 | H0 |
| ATOM 7838 HG3 PRO C 95   | -39.566 | 13.671 | 23.421 | 1.00 | 44.05 |      | H0 |
| ANISOU 7838 HG3 PRO C 95 | 5180    | 6180   | 5380   | -250 | 570   | -240 | H0 |
| ATOM 7839 HD2 PRO C 95   | -37.378 | 12.359 | 23.825 | 1.00 | 43.94 |      | H0 |
| ANISOU 7839 HD2 PRO C 95 | 5100    | 6300   | 5300   | -230 | 520   | -430 | H0 |
| ATOM 7840 HD3 PRO C 95   | -37.817 | 13.514 | 24.822 | 1.00 | 43.84 |      | H0 |
| ANISOU 7840 HD3 PRO C 95 | 5120    | 6170   | 5360   | -270 | 570   | -390 | H0 |
| ATOM 7841 N GLU C 96     | -40.579 | 9.145  | 26.330 | 1.00 | 41.40 |      | N0 |
| ANISOU 7841 N GLU C 96   | 4990    | 5780   | 4960   | -130 | 300   | -430 | N0 |
| ATOM 7842 CA GLU C 96    | -41.144 | 7.788  | 26.100 | 1.00 | 41.70 |      | C0 |
| ANISOU 7842 CA GLU C 96  | 5090    | 5810   | 4940   | -120 | 220   | -430 | C0 |
| ATOM 7843 C GLU C 96     | -42.607 | 7.962  | 25.669 | 1.00 | 40.11 |      | C0 |
| ANISOU 7843 C GLU C 96   | 4890    | 5610   | 4740   | -160 | 230   | -330 | C0 |
| ATOM 7844 O GLU C 96     | -43.481 | 8.090  | 26.551 | 1.00 | 38.57 |      | O0 |
| ANISOU 7844 O GLU C 96   | 4700    | 5390   | 4560   | -190 | 240   | -300 | O0 |
| ATOM 7845 CB GLU C 96    | -41.005 | 6.895  | 27.339 | 1.00 | 43.60 |      | C0 |
| ANISOU 7845 CB GLU C 96  | 5410    | 6000   | 5160   | -120 | 140   | -480 | C0 |
| ATOM 7846 CG GLU C 96    | -41.160 | 5.409  | 27.025 | 1.00 | 46.34 |      | C0 |
| ANISOU 7846 CG GLU C 96  | 5850    | 6320   | 5440   | -100 | 30    | -500 | C0 |
| ATOM 7847 CD GLU C 96    | -41.460 | 4.473  | 28.189 | 1.00 | 48.31 |      | C0 |
| ANISOU 7847 CD GLU C 96  | 6200    | 6500   | 5660   | -130 | -50   | -510 | C0 |
| ATOM 7848 OE1 GLU C 96   | -41.355 | 4.913  | 29.355 | 1.00 | 49.11 |      | O0 |
| ANISOU 7848 OE1 GLU C 96 | 6300    | 6580   | 5780   | -160 | -30   | -510 | O0 |
| ATOM 7849 OE2 GLU C 96   | -41.807 | 3.285  | 27.924 | 1.00 | 50.63 |      | O0 |
| ANISOU 7849 OE2 GLU C 96 | 6590    | 6750   | 5890   | -140 | -150  | -510 | O0 |
| ATOM 7850 H GLU C 96     | -40.635 | 9.421  | 27.196 | 1.00 | 41.50 |      | H0 |
| ANISOU 7850 H GLU C 96   | 5010    | 5760   | 5000   | -150 | 320   | -430 | H0 |
| ATOM 7851 HA GLU C 96    | -40.649 | 7.369  | 25.359 | 1.00 | 41.90 |      | H0 |
| ANISOU 7851 HA GLU C 96  | 5110    | 5870   | 4930   | -90  | 190   | -460 | H0 |
| ATOM 7852 HB2 GLU C 96   | -40.123 | 7.048  | 27.738 | 1.00 | 43.75 |      | H0 |
| ANISOU 7852 HB2 GLU C 96 | 5410    | 6020   | 5190   | -100 | 150   | -530 | H0 |
| ATOM 7853 HB3 GLU C 96   | -41.683 | 7.157  | 27.995 | 1.00 | 43.53 |      | H0 |
| ANISOU 7853 HB3 GLU C 96 | 5400    | 5970   | 5170   | -160 | 160   | -440 | H0 |
| ATOM 7854 HG2 GLU C 96   | -41.879 | 5.306  | 26.366 | 1.00 | 46.17 |      | H0 |
| ANISOU 7854 HG2 GLU C 96 | 5820    | 6310   | 5400   | -130 | 40    | -450 | H0 |



|                           |         |        |        |      |       |      |    |
|---------------------------|---------|--------|--------|------|-------|------|----|
| ATOM 7855 HG3 GLU C 96    | -40.333 | 5.098  | 26.597 | 1.00 | 46.40 | H0   |    |
| ANISOU 7855 HG3 GLU C 96  | 5850    | 6350   | 5430   | -50  | 10    | -550 | H0 |
| ATOM 7856 N VAL C 97      | -42.855 | 8.008  | 24.355 | 1.00 | 38.67 | N0   |    |
| ANISOU 7856 N VAL C 97    | 4680    | 5480   | 4530   | -150 | 240   | -290 | N0 |
| ATOM 7857 CA VAL C 97     | -44.223 | 8.162  | 23.774 | 1.00 | 37.83 | C0   |    |
| ANISOU 7857 CA VAL C 97   | 4550    | 5400   | 4420   | -180 | 240   | -200 | C0 |
| ATOM 7858 C VAL C 97      | -44.965 | 6.841  | 23.988 | 1.00 | 37.20 | C0   |    |
| ANISOU 7858 C VAL C 97    | 4540    | 5310   | 4280   | -220 | 150   | -200 | C0 |
| ATOM 7859 O VAL C 97      | -44.476 | 5.808  | 23.502 | 1.00 | 37.67 | O0   |    |
| ANISOU 7859 O VAL C 97    | 4660    | 5370   | 4280   | -210 | 90    | -260 | O0 |
| ATOM 7860 CB VAL C 97     | -44.209 | 8.566  | 22.286 | 1.00 | 37.86 | C0   |    |
| ANISOU 7860 CB VAL C 97   | 4520    | 5460   | 4400   | -170 | 260   | -150 | C0 |
| ATOM 7861 CG1 VAL C 97    | -45.617 | 8.855  | 21.789 | 1.00 | 38.25 | C0   |    |
| ANISOU 7861 CG1 VAL C 97  | 4540    | 5540   | 4450   | -190 | 260   | -60  | C0 |
| ATOM 7862 CG2 VAL C 97    | -43.303 | 9.757  | 22.015 | 1.00 | 38.12 | C0   |    |
| ANISOU 7862 CG2 VAL C 97  | 4510    | 5500   | 4470   | -160 | 330   | -150 | C0 |
| ATOM 7863 H VAL C 97      | -42.199 | 7.929  | 23.730 | 1.00 | 38.97 | H0   |    |
| ANISOU 7863 H VAL C 97    | 4710    | 5550   | 4550   | -130 | 240   | -320 | H0 |
| ATOM 7864 HA VAL C 97     | -44.686 | 8.858  | 24.274 | 1.00 | 37.76 | H0   |    |
| ANISOU 7864 HA VAL C 97   | 4520    | 5380   | 4450   | -190 | 280   | -170 | H0 |
| ATOM 7865 HB VAL C 97     | -43.859 | 7.797  | 21.772 | 1.00 | 38.09 | H0   |    |
| ANISOU 7865 HB VAL C 97   | 4580    | 5510   | 4380   | -170 | 220   | -190 | H0 |
| ATOM 7866 HG11 VAL C 97   | -46.067 | 8.017  | 21.580 | 1.00 | 38.29 | H0   |    |
| ANISOU 7866 HG11 VAL C 97 | 4570    | 5570   | 4410   | -220 | 210   | -60  | H0 |
| ATOM 7867 HG12 VAL C 97   | -45.574 | 9.405  | 20.990 | 1.00 | 38.47 | H0   |    |
| ANISOU 7867 HG12 VAL C 97 | 4540    | 5600   | 4480   | -190 | 280   | -10  | H0 |
| ATOM 7868 HG13 VAL C 97   | -46.116 | 9.326  | 22.479 | 1.00 | 38.15 | H0   |    |
| ANISOU 7868 HG13 VAL C 97 | 4510    | 5510   | 4480   | -190 | 280   | -30  | H0 |
| ATOM 7869 HG21 VAL C 97   | -43.518 | 10.476 | 22.635 | 1.00 | 38.01 | H0   |    |
| ANISOU 7869 HG21 VAL C 97 | 4480    | 5450   | 4510   | -160 | 370   | -130 | H0 |
| ATOM 7870 HG22 VAL C 97   | -43.436 | 10.067 | 21.102 | 1.00 | 38.38 | H0   |    |
| ANISOU 7870 HG22 VAL C 97 | 4520    | 5570   | 4490   | -170 | 350   | -110 | H0 |
| ATOM 7871 HG23 VAL C 97   | -42.374 | 9.494  | 22.134 | 1.00 | 38.07 | H0   |    |
| ANISOU 7871 HG23 VAL C 97 | 4510    | 5500   | 4450   | -150 | 330   | -220 | H0 |
| ATOM 7872 N LEU C 98      | -46.086 | 6.883  | 24.714 | 1.00 | 36.64 | N0   |    |
| ANISOU 7872 N LEU C 98    | 4460    | 5240   | 4220   | -270 | 160   | -160 | N0 |
| ATOM 7873 CA LEU C 98     | -46.835 | 5.685  | 25.167 | 1.00 | 36.06 | C0   |    |
| ANISOU 7873 CA LEU C 98   | 4460    | 5160   | 4080   | -340 | 80    | -150 | C0 |
| ATOM 7874 C LEU C 98      | -47.932 | 5.319  | 24.165 | 1.00 | 35.37 | C0   |    |
| ANISOU 7874 C LEU C 98    | 4350    | 5140   | 3950   | -390 | 50    | -90  | C0 |
| ATOM 7875 O LEU C 98      | -48.465 | 4.214  | 24.288 | 1.00 | 36.11 | O0   |    |
| ANISOU 7875 O LEU C 98    | 4520    | 5230   | 3980   | -460 | -30   | -90  | O0 |
| ATOM 7876 CB LEU C 98     | -47.457 | 5.976  | 26.534 | 1.00 | 36.43 | C0   |    |
| ANISOU 7876 CB LEU C 98   | 4490    | 5210   | 4150   | -390 | 110   | -140 | C0 |
| ATOM 7877 CG LEU C 98     | -46.474 | 6.364  | 27.635 | 1.00 | 36.07 | C0   |    |
| ANISOU 7877 CG LEU C 98   | 4460    | 5100   | 4140   | -350 | 140   | -200 | C0 |
| ATOM 7878 CD1 LEU C 98    | -47.220 | 6.747  | 28.899 | 1.00 | 35.78 | C0   |    |
| ANISOU 7878 CD1 LEU C 98  | 4400    | 5080   | 4120   | -400 | 190   | -190 | C0 |
| ATOM 7879 CD2 LEU C 98    | -45.500 | 5.230  | 27.907 | 1.00 | 36.35 | C0   |    |
| ANISOU 7879 CD2 LEU C 98  | 4610    | 5070   | 4130   | -350 | 50    | -270 | C0 |
| ATOM 7880 H LEU C 98      | -46.467 | 7.668  | 24.975 | 1.00 | 36.58 | H0   |    |
| ANISOU 7880 H LEU C 98    | 4400    | 5240   | 4250   | -260 | 210   | -130 | H0 |
| ATOM 7881 HA LEU C 98     | -46.208 | 4.929  | 25.242 | 1.00 | 36.09 | H0   |    |
| ANISOU 7881 HA LEU C 98   | 4530    | 5120   | 4060   | -330 | 30    | -200 | H0 |

|                           |         |       |        |      |       |      |    |
|---------------------------|---------|-------|--------|------|-------|------|----|
| ATOM 7882 HB2 LEU C 98    | -48.105 | 6.701 | 26.428 | 1.00 | 36.44 | H0   |    |
| ANISOU 7882 HB2 LEU C 98  | 4410    | 5250  | 4180   | -380 | 160   | -100 | H0 |
| ATOM 7883 HB3 LEU C 98    | -47.948 | 5.182 | 26.823 | 1.00 | 36.59 | H0   |    |
| ANISOU 7883 HB3 LEU C 98  | 4550    | 5230  | 4120   | -450 | 60    | -130 | H0 |
| ATOM 7884 HG LEU C 98     | -45.958 | 7.150 | 27.330 | 1.00 | 35.87 | H0   |    |
| ANISOU 7884 HG LEU C 98   | 4390    | 5080  | 4160   | -300 | 190   | -210 | H0 |
| ATOM 7885 HD11 LEU C 98   | -47.807 | 7.501 | 28.715 | 1.00 | 36.02 | H0   |    |
| ANISOU 7885 HD11 LEU C 98 | 4350    | 5150  | 4180   | -390 | 240   | -160 | H0 |
| ATOM 7886 HD12 LEU C 98   | -46.582 | 6.995 | 29.591 | 1.00 | 35.76 | H0   |    |
| ANISOU 7886 HD12 LEU C 98 | 4410    | 5040  | 4130   | -390 | 200   | -230 | H0 |
| ATOM 7887 HD13 LEU C 98   | -47.751 | 5.991 | 29.205 | 1.00 | 36.18 | H0   |    |
| ANISOU 7887 HD13 LEU C 98 | 4490    | 5150  | 4110   | -470 | 140   | -180 | H0 |
| ATOM 7888 HD21 LEU C 98   | -45.990 | 4.392 | 27.980 | 1.00 | 36.55 | H0   |    |
| ANISOU 7888 HD21 LEU C 98 | 4690    | 5090  | 4110   | -400 | -10   | -250 | H0 |
| ATOM 7889 HD22 LEU C 98   | -45.026 | 5.401 | 28.739 | 1.00 | 36.17 | H0   |    |
| ANISOU 7889 HD22 LEU C 98 | 4590    | 5020  | 4130   | -340 | 60    | -300 | H0 |
| ATOM 7890 HD23 LEU C 98   | -44.860 | 5.168 | 27.177 | 1.00 | 36.22 | H0   |    |
| ANISOU 7890 HD23 LEU C 98 | 4590    | 5050  | 4120   | -300 | 40    | -290 | H0 |
| ATOM 7891 N THR C 99      | -48.263 | 6.213 | 23.233 | 1.00 | 34.58 | N0   |    |
| ANISOU 7891 N THR C 99    | 4160    | 5100  | 3880   | -350 | 100   | -30  | N0 |
| ATOM 7892 CA THR C 99     | -49.496 | 6.143 | 22.409 | 1.00 | 34.79 | C0   |    |
| ANISOU 7892 CA THR C 99   | 4140    | 5210  | 3870   | -390 | 70    | 40   | C0 |
| ATOM 7893 C THR C 99      | -49.158 | 5.993 | 20.929 | 1.00 | 35.72 | C0   |    |
| ANISOU 7893 C THR C 99    | 4270    | 5360  | 3940   | -370 | 50    | 50   | C0 |
| ATOM 7894 O THR C 99      | -48.085 | 6.395 | 20.477 | 1.00 | 35.25 | O0   |    |
| ANISOU 7894 O THR C 99    | 4220    | 5280  | 3900   | -310 | 80    | 20   | O0 |
| ATOM 7895 CB THR C 99     | -50.360 | 7.389 | 22.638 | 1.00 | 34.28 | C0   |    |
| ANISOU 7895 CB THR C 99   | 3960    | 5200  | 3870   | -360 | 140   | 110  | C0 |
| ATOM 7896 OG1 THR C 99    | -49.486 | 8.516 | 22.578 | 1.00 | 33.18 | O0   |    |
| ANISOU 7896 OG1 THR C 99  | 3800    | 5010  | 3800   | -280 | 210   | 100  | O0 |
| ATOM 7897 CG2 THR C 99    | -51.088 | 7.358 | 23.963 | 1.00 | 34.02 | C0   |    |
| ANISOU 7897 CG2 THR C 99  | 3900    | 5180  | 3840   | -400 | 170   | 100  | C0 |
| ATOM 7898 H THR C 99      | -47.750 | 6.936 | 23.028 | 1.00 | 34.57 | H0   |    |
| ANISOU 7898 H THR C 99    | 4130    | 5090  | 3910   | -300 | 140   | -40  | H0 |
| ATOM 7899 HA THR C 99     | -50.007 | 5.354 | 22.698 | 1.00 | 35.08 | H0   |    |
| ANISOU 7899 HA THR C 99   | 4210    | 5260  | 3860   | -460 | 20    | 40   | H0 |
| ATOM 7900 HB THR C 99     | -51.021 | 7.452 | 21.908 | 1.00 | 34.58 | H0   |    |
| ANISOU 7900 HB THR C 99   | 3960    | 5300  | 3880   | -370 | 130   | 160  | H0 |
| ATOM 7901 HG21 THR C 99   | -51.899 | 6.826 | 23.876 | 1.00 | 34.55 | H0   |    |
| ANISOU 7901 HG21 THR C 99 | 3950    | 5310  | 3870   | -460 | 130   | 130  | H0 |
| ATOM 7902 HG22 THR C 99   | -51.322 | 8.266 | 24.226 | 1.00 | 34.24 | H0   |    |
| ANISOU 7902 HG22 THR C 99 | 3860    | 5220  | 3930   | -350 | 220   | 120  | H0 |
| ATOM 7903 HG23 THR C 99   | -50.512 | 6.963 | 24.642 | 1.00 | 33.84 | H0   |    |
| ANISOU 7903 HG23 THR C 99 | 3940    | 5100  | 3820   | -420 | 160   | 50   | H0 |
| ATOM 7904 N PRO C 100     | -50.084 | 5.421 | 20.129 | 1.00 | 36.89 | N0   |    |
| ANISOU 7904 N PRO C 100   | 4410    | 5580  | 4030   | -430 | -10   | 100  | N0 |
| ATOM 7905 CA PRO C 100    | -49.923 | 5.368 | 18.675 | 1.00 | 37.26 | C0   |    |
| ANISOU 7905 CA PRO C 100  | 4460    | 5670  | 4020   | -420 | -30   | 110  | C0 |
| ATOM 7906 C PRO C 100     | -49.616 | 6.758 | 18.096 | 1.00 | 38.21 | C0   |    |
| ANISOU 7906 C PRO C 100   | 4510    | 5820  | 4190   | -340 | 40    | 170  | C0 |
| ATOM 7907 O PRO C 100     | -50.271 | 7.723 | 18.478 | 1.00 | 38.62 | O0   |    |
| ANISOU 7907 O PRO C 100   | 4480    | 5880  | 4310   | -320 | 80    | 230  | O0 |
| ATOM 7908 CB PRO C 100    | -51.285 | 4.843 | 18.187 | 1.00 | 38.12 | C0   |    |
| ANISOU 7908 CB PRO C 100  | 4550    | 5870  | 4070   | -500 | -100  | 180  | C0 |

|                            |         |        |        |      |       |     |    |
|----------------------------|---------|--------|--------|------|-------|-----|----|
| ATOM 7909 CG PRO C 100     | -51.812 | 4.038  | 19.357 | 1.00 | 38.08 | C0  |    |
| ANISOU 7909 CG PRO C 100   | 4580    | 5830   | 4050   | -580 | -130  | 150 | C0 |
| ATOM 7910 CD PRO C 100     | -51.327 | 4.778  | 20.587 | 1.00 | 37.12 | C0  |    |
| ANISOU 7910 CD PRO C 100   | 4440    | 5650   | 4020   | -530 | -60   | 130 | C0 |
| ATOM 7911 HA PRO C 100     | -49.209 | 4.725  | 18.440 | 1.00 | 37.43 | H0  |    |
| ANISOU 7911 HA PRO C 100   | 4560    | 5660   | 4010   | -410 | -60   | 50  | H0 |
| ATOM 7912 HB2 PRO C 100    | -51.891 | 5.583  | 17.971 | 1.00 | 38.29 | H0  |    |
| ANISOU 7912 HB2 PRO C 100  | 4490    | 5950   | 4120   | -480 | -70   | 240 | H0 |
| ATOM 7913 HB3 PRO C 100    | -51.179 | 4.277  | 17.393 | 1.00 | 38.37 | H0  |    |
| ANISOU 7913 HB3 PRO C 100  | 4630    | 5910   | 4040   | -520 | -140  | 160 | H0 |
| ATOM 7914 HG2 PRO C 100    | -52.789 | 3.998  | 19.339 | 1.00 | 38.46 | H0  |    |
| ANISOU 7914 HG2 PRO C 100  | 4580    | 5960   | 4080   | -640 | -150  | 200 | H0 |
| ATOM 7915 HG3 PRO C 100    | -51.458 | 3.125  | 19.339 | 1.00 | 38.09 | H0  |    |
| ANISOU 7915 HG3 PRO C 100  | 4680    | 5780   | 4000   | -620 | -190  | 100 | H0 |
| ATOM 7916 HD2 PRO C 100    | -51.978 | 5.442  | 20.879 | 1.00 | 37.39 | H0  |    |
| ANISOU 7916 HD2 PRO C 100  | 4380    | 5740   | 4080   | -520 | -20   | 180 | H0 |
| ATOM 7917 HD3 PRO C 100    | -51.153 | 4.159  | 21.320 | 1.00 | 37.14 | H0  |    |
| ANISOU 7917 HD3 PRO C 100  | 4500    | 5610   | 4000   | -560 | -80   | 90  | H0 |
| ATOM 7918 N GLN C 101      | -48.619 | 6.838  | 17.211 | 1.00 | 38.94 | N0  |    |
| ANISOU 7918 N GLN C 101    | 4630    | 5910   | 4260   | -310 | 50    | 140 | N0 |
| ATOM 7919 CA GLN C 101     | -48.110 | 8.117  | 16.658 | 1.00 | 39.77 | C0  |    |
| ANISOU 7919 CA GLN C 101   | 4690    | 6030   | 4400   | -270 | 120   | 190 | C0 |
| ATOM 7920 C GLN C 101      | -48.989 | 8.535  | 15.469 | 1.00 | 39.98 | C0  |    |
| ANISOU 7920 C GLN C 101    | 4670    | 6140   | 4380   | -280 | 100   | 290 | C0 |
| ATOM 7921 O GLN C 101      | -48.485 | 8.570  | 14.331 | 1.00 | 40.75 | O0  |    |
| ANISOU 7921 O GLN C 101    | 4780    | 6290   | 4410   | -290 | 100   | 300 | O0 |
| ATOM 7922 CB GLN C 101     | -46.623 | 7.970  | 16.329 | 1.00 | 41.77 | C0  |    |
| ANISOU 7922 CB GLN C 101   | 4970    | 6270   | 4620   | -250 | 150   | 100 | C0 |
| ATOM 7923 CG GLN C 101     | -45.744 | 7.893  | 17.573 | 1.00 | 42.76 | C0  |    |
| ANISOU 7923 CG GLN C 101   | 5120    | 6320   | 4810   | -220 | 170   | 10  | C0 |
| ATOM 7924 CD GLN C 101     | -45.531 | 9.255  | 18.198 | 1.00 | 44.68 | C0  |    |
| ANISOU 7924 CD GLN C 101   | 5320    | 6520   | 5140   | -200 | 250   | 60  | C0 |
| ATOM 7925 OE1 GLN C 101    | -46.457 | 9.892  | 18.709 | 1.00 | 43.73 | O0  |    |
| ANISOU 7925 OE1 GLN C 101  | 5170    | 6370   | 5080   | -200 | 270   | 120 | O0 |
| ATOM 7926 NE2 GLN C 101    | -44.296 | 9.730  | 18.143 | 1.00 | 45.65 | N0  |    |
| ANISOU 7926 NE2 GLN C 101  | 5430    | 6640   | 5270   | -190 | 300   | 10  | N0 |
| ATOM 7927 H GLN C 101      | -48.193 | 6.101  | 16.887 | 1.00 | 39.02 | H0  |    |
| ANISOU 7927 H GLN C 101    | 4690    | 5920   | 4220   | -320 | 20    | 80  | H0 |
| ATOM 7928 HA GLN C 101     | -48.203 | 8.803  | 17.356 | 1.00 | 39.73 | H0  |    |
| ANISOU 7928 HA GLN C 101   | 4650    | 5980   | 4460   | -250 | 160   | 210 | H0 |
| ATOM 7929 HB2 GLN C 101    | -46.497 | 7.159  | 15.793 | 1.00 | 41.83 | H0  |    |
| ANISOU 7929 HB2 GLN C 101  | 5020    | 6310   | 4560   | -260 | 110   | 60  | H0 |
| ATOM 7930 HB3 GLN C 101    | -46.344 | 8.736  | 15.785 | 1.00 | 41.87 | H0  |    |
| ANISOU 7930 HB3 GLN C 101  | 4960    | 6310   | 4640   | -240 | 190   | 140 | H0 |
| ATOM 7931 HG2 GLN C 101    | -46.166 | 7.300  | 18.231 | 1.00 | 42.64 | H0  |    |
| ANISOU 7931 HG2 GLN C 101  | 5130    | 6280   | 4800   | -230 | 140   | 0   | H0 |
| ATOM 7932 HG3 GLN C 101    | -44.875 | 7.506  | 17.332 | 1.00 | 42.92 | H0  |    |
| ANISOU 7932 HG3 GLN C 101  | 5160    | 6350   | 4790   | -200 | 170   | -50 | H0 |
| ATOM 7933 HE21 GLN C 101   | -44.029 | 10.335 | 18.731 | 1.00 | 45.20 | H0  |    |
| ANISOU 7933 HE21 GLN C 101 | 5360    | 6540   | 5270   | -190 | 340   | 10  | H0 |
| ATOM 7934 HE22 GLN C 101   | -43.738 | 9.447  | 17.517 | 1.00 | 45.57 | H0  |    |
| ANISOU 7934 HE22 GLN C 101 | 5430    | 6680   | 5210   | -190 | 300   | -20 | H0 |
| ATOM 7935 N LEU C 102      | -50.257 | 8.854  | 15.750 | 1.00 | 39.38 | N0  |    |
| ANISOU 7935 N LEU C 102    | 4530    | 6090   | 4340   | -280 | 80    | 370 | N0 |

|                            |         |        |        |      |       |     |    |
|----------------------------|---------|--------|--------|------|-------|-----|----|
| ATOM 7936 CA LEU C 102     | -51.264 | 9.361  | 14.780 | 1.00 | 39.68 | C0  |    |
| ANISOU 7936 CA LEU C 102   | 4510    | 6210   | 4350   | -280 | 50    | 480 | C0 |
| ATOM 7937 C LEU C 102      | -51.722 | 10.757 | 15.219 | 1.00 | 39.36 | C0  |    |
| ANISOU 7937 C LEU C 102    | 4410    | 6140   | 4410   | -200 | 90    | 560 | C0 |
| ATOM 7938 O LEU C 102      | -51.960 | 10.962 | 16.424 | 1.00 | 38.73 | O0  |    |
| ANISOU 7938 O LEU C 102    | 4300    | 6010   | 4400   | -170 | 130   | 520 | O0 |
| ATOM 7939 CB LEU C 102     | -52.456 | 8.399  | 14.718 | 1.00 | 39.78 | C0  |    |
| ANISOU 7939 CB LEU C 102   | 4500    | 6310   | 4310   | -340 | -30   | 490 | C0 |
| ATOM 7940 CG LEU C 102     | -52.134 | 6.942  | 14.391 | 1.00 | 39.97 | C0  |    |
| ANISOU 7940 CG LEU C 102   | 4610    | 6340   | 4230   | -420 | -90   | 410 | C0 |
| ATOM 7941 CD1 LEU C 102    | -53.402 | 6.110  | 14.317 | 1.00 | 40.90 | C0  |    |
| ANISOU 7941 CD1 LEU C 102  | 4700    | 6540   | 4290   | -510 | -170  | 430 | C0 |
| ATOM 7942 CD2 LEU C 102    | -51.363 | 6.834  | 13.090 | 1.00 | 40.75 | C0  |    |
| ANISOU 7942 CD2 LEU C 102  | 4760    | 6470   | 4250   | -420 | -100  | 400 | C0 |
| ATOM 7943 H LEU C 102      | -50.590 | 8.786  | 16.594 | 1.00 | 39.22 | H0  |    |
| ANISOU 7943 H LEU C 102    | 4500    | 6050   | 4360   | -280 | 90    | 350 | H0 |
| ATOM 7944 HA LEU C 102     | -50.843 | 9.425  | 13.894 | 1.00 | 39.88 | H0  |    |
| ANISOU 7944 HA LEU C 102   | 4560    | 6260   | 4330   | -290 | 40    | 490 | H0 |
| ATOM 7945 HB2 LEU C 102    | -52.915 | 8.425  | 15.581 | 1.00 | 39.77 | H0  |    |
| ANISOU 7945 HB2 LEU C 102  | 4460    | 6300   | 4350   | -340 | -20   | 480 | H0 |
| ATOM 7946 HB3 LEU C 102    | -53.082 | 8.733  | 14.044 | 1.00 | 40.55 | H0  |    |
| ANISOU 7946 HB3 LEU C 102  | 4550    | 6470   | 4380   | -340 | -50   | 560 | H0 |
| ATOM 7947 HG LEU C 102     | -51.568 | 6.580  | 15.117 | 1.00 | 39.53 | H0  |    |
| ANISOU 7947 HG LEU C 102   | 4600    | 6220   | 4200   | -420 | -70   | 340 | H0 |
| ATOM 7948 HD11 LEU C 102   | -53.902 | 6.205  | 15.146 | 1.00 | 40.70 | H0  |    |
| ANISOU 7948 HD11 LEU C 102 | 4640    | 6520   | 4310   | -510 | -150  | 440 | H0 |
| ATOM 7949 HD12 LEU C 102   | -53.169 | 5.174  | 14.185 | 1.00 | 40.79 | H0  |    |
| ANISOU 7949 HD12 LEU C 102 | 4770    | 6510   | 4220   | -560 | -210  | 380 | H0 |
| ATOM 7950 HD13 LEU C 102   | -53.948 | 6.415  | 13.572 | 1.00 | 41.39 | H0  |    |
| ANISOU 7950 HD13 LEU C 102 | 4720    | 6680   | 4320   | -510 | -190  | 500 | H0 |
| ATOM 7951 HD21 LEU C 102   | -51.731 | 7.459  | 12.440 | 1.00 | 41.11 | H0  |    |
| ANISOU 7951 HD21 LEU C 102 | 4760    | 6570   | 4290   | -410 | -100  | 470 | H0 |
| ATOM 7952 HD22 LEU C 102   | -51.434 | 5.928  | 12.743 | 1.00 | 40.89 | H0  |    |
| ANISOU 7952 HD22 LEU C 102 | 4830    | 6510   | 4200   | -470 | -150  | 350 | H0 |
| ATOM 7953 HD23 LEU C 102   | -50.427 | 7.046  | 13.249 | 1.00 | 40.24 | H0  |    |
| ANISOU 7953 HD23 LEU C 102 | 4720    | 6360   | 4210   | -390 | -50   | 350 | H0 |
| ATOM 7954 N ALA C 103      | -51.811 | 11.686 | 14.269 | 1.00 | 39.72 | N0  |    |
| ANISOU 7954 N ALA C 103    | 4450    | 6200   | 4450   | -170 | 90    | 650 | N0 |
| ATOM 7955 CA ALA C 103     | -52.427 | 13.019 | 14.440 | 1.00 | 40.51 | C0  |    |
| ANISOU 7955 CA ALA C 103   | 4500    | 6260   | 4630   | -80  | 110   | 740 | C0 |
| ATOM 7956 C ALA C 103      | -53.832 | 12.977 | 13.837 | 1.00 | 41.16 | C0  |    |
| ANISOU 7956 C ALA C 103    | 4500    | 6460   | 4680   | -50  | 30    | 830 | C0 |
| ATOM 7957 O ALA C 103      | -54.029 | 12.248 | 12.851 | 1.00 | 41.63 | O0  |    |
| ANISOU 7957 O ALA C 103    | 4560    | 6610   | 4640   | -120 | -30   | 850 | O0 |
| ATOM 7958 CB ALA C 103     | -51.575 | 14.078 | 13.783 | 1.00 | 40.95 | C0  |    |
| ANISOU 7958 CB ALA C 103   | 4620    | 6240   | 4700   | -60  | 140   | 800 | C0 |
| ATOM 7959 H ALA C 103      | -51.492 | 11.562 | 13.425 | 1.00 | 40.07 | H0  |    |
| ANISOU 7959 H ALA C 103    | 4520    | 6270   | 4430   | -190 | 70    | 670 | H0 |
| ATOM 7960 HA ALA C 103     | -52.501 | 13.216 | 15.403 | 1.00 | 40.12 | H0  |    |
| ANISOU 7960 HA ALA C 103   | 4430    | 6160   | 4650   | -40  | 140   | 700 | H0 |
| ATOM 7961 HB1 ALA C 103    | -51.951 | 14.956 | 13.965 | 1.00 | 41.46 | H0  |    |
| ANISOU 7961 HB1 ALA C 103  | 4670    | 6260   | 4820   | 0    | 140   | 850 | H0 |
| ATOM 7962 HB2 ALA C 103    | -50.671 | 14.034 | 14.137 | 1.00 | 40.38 | H0  |    |
| ANISOU 7962 HB2 ALA C 103  | 4590    | 6120   | 4630   | -80  | 180   | 740 | H0 |

|                            |         |        |        |      |       |      |    |
|----------------------------|---------|--------|--------|------|-------|------|----|
| ATOM 7963 HB3 ALA C 103    | -51.554 | 13.929 | 12.823 | 1.00 | 41.36 | H0   |    |
| ANISOU 7963 HB3 ALA C 103  | 4680    | 6350   | 4680   | -90  | 110   | 840  | H0 |
| ATOM 7964 N ARG C 104      | -54.767 | 13.724 | 14.419 | 1.00 | 41.12 | N0   |    |
| ANISOU 7964 N ARG C 104    | 4420    | 6450   | 4750   | 40   | 30    | 870  | N0 |
| ATOM 7965 CA ARG C 104     | -56.099 | 13.987 | 13.822 | 1.00 | 41.85 | C0   |    |
| ANISOU 7965 CA ARG C 104   | 4410    | 6660   | 4830   | 90   | -40   | 960  | C0 |
| ATOM 7966 C ARG C 104      | -55.979 | 15.234 | 12.941 | 1.00 | 42.43 | C0   |    |
| ANISOU 7966 C ARG C 104    | 4530    | 6670   | 4920   | 180  | -60   | 1070 | C0 |
| ATOM 7967 O ARG C 104      | -55.515 | 16.274 | 13.449 | 1.00 | 42.46 | O0   |    |
| ANISOU 7967 O ARG C 104    | 4580    | 6540   | 5020   | 250  | -10   | 1080 | O0 |
| ATOM 7968 CB ARG C 104     | -57.149 | 14.154 | 14.921 | 1.00 | 42.09 | C0   |    |
| ANISOU 7968 CB ARG C 104   | 4320    | 6740   | 4930   | 160  | -20   | 930  | C0 |
| ATOM 7969 CG ARG C 104     | -58.582 | 14.021 | 14.435 | 1.00 | 43.36 | C0   |    |
| ANISOU 7969 CG ARG C 104   | 4350    | 7080   | 5050   | 190  | -100  | 1000 | C0 |
| ATOM 7970 CD ARG C 104     | -58.936 | 12.606 | 14.025 | 1.00 | 42.88 | C0   |    |
| ANISOU 7970 CD ARG C 104   | 4260    | 7150   | 4880   | 40   | -160  | 980  | C0 |
| ATOM 7971 NE ARG C 104     | -60.353 | 12.498 | 13.712 | 1.00 | 43.98 | N0   |    |
| ANISOU 7971 NE ARG C 104   | 4250    | 7480   | 4980   | 50   | -230  | 1030 | N0 |
| ATOM 7972 CZ ARG C 104     | -60.931 | 11.445 | 13.147 | 1.00 | 44.44 | C0   |    |
| ANISOU 7972 CZ ARG C 104   | 4270    | 7680   | 4930   | -70  | -300  | 1040 | C0 |
| ATOM 7973 NH1 ARG C 104    | -60.216 | 10.380 | 12.818 | 1.00 | 43.63 | N0   |    |
| ANISOU 7973 NH1 ARG C 104  | 4280    | 7550   | 4750   | -220 | -310  | 990  | N0 |
| ATOM 7974 NH2 ARG C 104    | -62.231 | 11.468 | 12.907 | 1.00 | 45.96 | N0   |    |
| ANISOU 7974 NH2 ARG C 104  | 4300    | 8060   | 5100   | -60  | -360  | 1090 | N0 |
| ATOM 7975 H ARG C 104      | -54.642 | 14.125 | 15.228 | 1.00 | 40.91 | H0   |    |
| ANISOU 7975 H ARG C 104    | 4390    | 6360   | 4800   | 80   | 80    | 830  | H0 |
| ATOM 7976 HA ARG C 104     | -56.345 | 13.220 | 13.257 | 1.00 | 41.90 | H0   |    |
| ANISOU 7976 HA ARG C 104   | 4400    | 6760   | 4760   | 20   | -80   | 960  | H0 |
| ATOM 7977 HB2 ARG C 104    | -56.986 | 13.479 | 15.613 | 1.00 | 41.39 | H0   |    |
| ANISOU 7977 HB2 ARG C 104  | 4240    | 6660   | 4830   | 100  | 0     | 860  | H0 |
| ATOM 7978 HB3 ARG C 104    | -57.036 | 15.036 | 15.329 | 1.00 | 42.36 | H0   |    |
| ANISOU 7978 HB3 ARG C 104  | 4370    | 6690   | 5040   | 250  | 10    | 940  | H0 |
| ATOM 7979 HG2 ARG C 104    | -59.191 | 14.306 | 15.149 | 1.00 | 43.70 | H0   |    |
| ANISOU 7979 HG2 ARG C 104  | 4310    | 7150   | 5150   | 260  | -80   | 980  | H0 |
| ATOM 7980 HG3 ARG C 104    | -58.719 | 14.617 | 13.668 | 1.00 | 44.07 | H0   |    |
| ANISOU 7980 HG3 ARG C 104  | 4440    | 7160   | 5140   | 250  | -140  | 1080 | H0 |
| ATOM 7981 HD2 ARG C 104    | -58.408 | 12.353 | 13.239 | 1.00 | 42.68 | H0   |    |
| ANISOU 7981 HD2 ARG C 104  | 4310    | 7110   | 4800   | -10  | -180  | 990  | H0 |
| ATOM 7982 HD3 ARG C 104    | -58.714 | 11.988 | 14.754 | 1.00 | 42.16 | H0   |    |
| ANISOU 7982 HD3 ARG C 104  | 4190    | 7050   | 4780   | -20  | -120  | 900  | H0 |
| ATOM 7983 HE ARG C 104     | -60.862 | 13.178 | 13.909 | 1.00 | 44.80 | H0   |    |
| ANISOU 7983 HE ARG C 104   | 4280    | 7600   | 5140   | 150  | -230  | 1060 | H0 |
| ATOM 7984 HH11 ARG C 104   | -59.353 | 10.360 | 12.975 | 1.00 | 42.78 | H0   |    |
| ANISOU 7984 HH11 ARG C 104 | 4270    | 7330   | 4660   | -220 | -270  | 950  | H0 |
| ATOM 7985 HH12 ARG C 104   | -60.609 | 9.689  | 12.444 | 1.00 | 43.93 | H0   |    |
| ANISOU 7985 HH12 ARG C 104 | 4310    | 7670   | 4710   | -300 | -360  | 990  | H0 |
| ATOM 7986 HH21 ARG C 104   | -62.706 | 12.177 | 13.125 | 1.00 | 46.63 | H0   |    |
| ANISOU 7986 HH21 ARG C 104 | 4310    | 8170   | 5240   | 50   | -360  | 1120 | H0 |
| ATOM 7987 HH22 ARG C 104   | -62.620 | 10.778 | 12.532 | 1.00 | 46.23 | H0   |    |
| ANISOU 7987 HH22 ARG C 104 | 4310    | 8190   | 5060   | -150 | -410  | 1100 | H0 |
| ATOM 7988 N VAL C 105      | -56.345 | 15.118 | 11.660 | 1.00 | 42.41 | N0   |    |
| ANISOU 7988 N VAL C 105    | 4520    | 6760   | 4830   | 150  | -140  | 1160 | N0 |
| ATOM 7989 CA VAL C 105     | -56.287 | 16.231 | 10.669 | 1.00 | 43.02 | C0   |    |
| ANISOU 7989 CA VAL C 105   | 4650    | 6790   | 4900   | 210  | -180  | 1300 | C0 |

|                            |         |        |        |      |       |      |    |
|----------------------------|---------|--------|--------|------|-------|------|----|
| ATOM 7990 C VAL C 105      | -57.719 | 16.552 | 10.224 | 1.00 | 43.89 | C0   |    |
| ANISOU 7990 C VAL C 105    | 4650    | 7010   | 5010   | 310  | -270  | 1390 | C0 |
| ATOM 7991 O VAL C 105      | -58.437 | 15.624 | 9.803  | 1.00 | 43.20 | O0   |    |
| ANISOU 7991 O VAL C 105    | 4480    | 7090   | 4840   | 240  | -330  | 1390 | O0 |
| ATOM 7992 CB VAL C 105     | -55.366 | 15.895 | 9.479  | 1.00 | 42.86 | C0   |    |
| ANISOU 7992 CB VAL C 105   | 4730    | 6790   | 4770   | 90   | -190  | 1320 | C0 |
| ATOM 7993 CG1 VAL C 105    | -55.215 | 17.075 | 8.533  | 1.00 | 44.43 | C0   |    |
| ANISOU 7993 CG1 VAL C 105  | 5010    | 6930   | 4950   | 130  | -220  | 1470 | C0 |
| ATOM 7994 CG2 VAL C 105    | -54.001 | 15.420 | 9.940  | 1.00 | 41.41 | C0   |    |
| ANISOU 7994 CG2 VAL C 105  | 4620    | 6530   | 4580   | 0    | -100  | 1210 | C0 |
| ATOM 7995 H VAL C 105      | -56.658 | 14.338 | 11.309 | 1.00 | 42.44 | H0   |    |
| ANISOU 7995 H VAL C 105    | 4490    | 6860   | 4770   | 90   | -170  | 1150 | H0 |
| ATOM 7996 HA VAL C 105     | -55.925 | 17.015 | 11.117 | 1.00 | 43.05 | H0   |    |
| ANISOU 7996 HA VAL C 105   | 4700    | 6680   | 4980   | 270  | -140  | 1300 | H0 |
| ATOM 7997 HB VAL C 105     | -55.790 | 15.156 | 8.976  | 1.00 | 43.03 | H0   |    |
| ANISOU 7997 HB VAL C 105   | 4710    | 6920   | 4710   | 40   | -230  | 1320 | H0 |
| ATOM 7998 HG11 VAL C 105   | -56.056 | 17.231 | 8.068  | 1.00 | 45.32 | H0   |    |
| ANISOU 7998 HG11 VAL C 105 | 5070    | 7110   | 5040   | 180  | -290  | 1540 | H0 |
| ATOM 7999 HG12 VAL C 105   | -54.518 | 16.884 | 7.882  | 1.00 | 44.26 | H0   |    |
| ANISOU 7999 HG12 VAL C 105 | 5050    | 6920   | 4850   | 50   | -210  | 1470 | H0 |
| ATOM 8000 HG13 VAL C 105   | -54.975 | 17.870 | 9.041  | 1.00 | 44.48 | H0   |    |
| ANISOU 8000 HG13 VAL C 105 | 5050    | 6810   | 5040   | 190  | -190  | 1480 | H0 |
| ATOM 8001 HG21 VAL C 105   | -53.625 | 16.067 | 10.562 | 1.00 | 41.26 | H0   |    |
| ANISOU 8001 HG21 VAL C 105 | 4630    | 6410   | 4640   | 50   | -50   | 1200 | H0 |
| ATOM 8002 HG22 VAL C 105   | -53.411 | 15.328 | 9.172  | 1.00 | 41.57 | H0   |    |
| ANISOU 8002 HG22 VAL C 105 | 4700    | 6570   | 4520   | -60  | -100  | 1230 | H0 |
| ATOM 8003 HG23 VAL C 105   | -54.089 | 14.559 | 10.384 | 1.00 | 40.72 | H0   |    |
| ANISOU 8003 HG23 VAL C 105 | 4500    | 6490   | 4480   | -30  | -90   | 1130 | H0 |
| ATOM 8004 N VAL C 106      | -58.101 | 17.828 | 10.339 | 1.00 | 45.05 | N0   |    |
| ANISOU 8004 N VAL C 106    | 4800    | 7070   | 5250   | 460  | -290  | 1470 | N0 |
| ATOM 8005 CA VAL C 106     | -59.447 | 18.375 | 9.996  | 1.00 | 46.91 | C0   |    |
| ANISOU 8005 CA VAL C 106   | 4930    | 7400   | 5500   | 600  | -390  | 1560 | C0 |
| ATOM 8006 C VAL C 106      | -59.374 | 18.959 | 8.578  | 1.00 | 48.08 | C0   |    |
| ANISOU 8006 C VAL C 106    | 5160    | 7530   | 5570   | 600  | -480  | 1710 | C0 |
| ATOM 8007 O VAL C 106      | -58.266 | 19.357 | 8.165  | 1.00 | 47.30 | O0   |    |
| ANISOU 8007 O VAL C 106    | 5220    | 7300   | 5450   | 530  | -440  | 1750 | O0 |
| ATOM 8008 CB VAL C 106     | -59.892 | 19.421 | 11.038 | 1.00 | 47.54 | C0   |    |
| ANISOU 8008 CB VAL C 106   | 4970    | 7370   | 5720   | 790  | -360  | 1540 | C0 |
| ATOM 8009 CG1 VAL C 106    | -61.349 | 19.817 | 10.857 | 1.00 | 49.51 | C0   |    |
| ANISOU 8009 CG1 VAL C 106  | 5070    | 7750   | 6000   | 950  | -460  | 1600 | C0 |
| ATOM 8010 CG2 VAL C 106    | -59.649 | 18.934 | 12.463 | 1.00 | 46.35 | C0   |    |
| ANISOU 8010 CG2 VAL C 106  | 4780    | 7200   | 5630   | 760  | -260  | 1380 | C0 |
| ATOM 8011 H VAL C 106      | -57.531 | 18.472 | 10.639 | 1.00 | 44.97 | H0   |    |
| ANISOU 8011 H VAL C 106    | 4870    | 6930   | 5290   | 490  | -250  | 1470 | H0 |
| ATOM 8012 HA VAL C 106     | -60.088 | 17.643 | 9.998  | 1.00 | 46.84 | H0   |    |
| ANISOU 8012 HA VAL C 106   | 4820    | 7530   | 5450   | 560  | -420  | 1530 | H0 |
| ATOM 8013 HB VAL C 106     | -59.340 | 20.229 | 10.899 | 1.00 | 47.94 | H0   |    |
| ANISOU 8013 HB VAL C 106   | 5130    | 7270   | 5810   | 820  | -360  | 1580 | H0 |
| ATOM 8014 HG11 VAL C 106   | -61.445 | 20.341 | 10.044 | 1.00 | 50.54 | H0   |    |
| ANISOU 8014 HG11 VAL C 106 | 5250    | 7850   | 6100   | 1000 | -530  | 1700 | H0 |
| ATOM 8015 HG12 VAL C 106   | -61.640 | 20.348 | 11.619 | 1.00 | 49.90 | H0   |    |
| ANISOU 8015 HG12 VAL C 106 | 5080    | 7750   | 6130   | 1070 | -430  | 1560 | H0 |
| ATOM 8016 HG13 VAL C 106   | -61.897 | 19.016 | 10.793 | 1.00 | 49.35 | H0   |    |
| ANISOU 8016 HG13 VAL C 106 | 4940    | 7890   | 5920   | 890  | -480  | 1570 | H0 |

|                            |         |        |        |      |       |      |    |
|----------------------------|---------|--------|--------|------|-------|------|----|
| ATOM 8017 HG21 VAL C 106   | -59.990 | 18.028 | 12.559 | 1.00 | 45.81 | H0   |    |
| ANISOU 8017 HG21 VAL C 106 | 4630    | 7260   | 5510   | 680  | -260  | 1340 | H0 |
| ATOM 8018 HG22 VAL C 106   | -60.106 | 19.521 | 13.091 | 1.00 | 46.94 | H0   |    |
| ANISOU 8018 HG22 VAL C 106 | 4800    | 7240   | 5790   | 880  | -250  | 1360 | H0 |
| ATOM 8019 HG23 VAL C 106   | -58.694 | 18.943 | 12.652 | 1.00 | 45.35 | H0   |    |
| ANISOU 8019 HG23 VAL C 106 | 4750    | 6960   | 5510   | 690  | -200  | 1350 | H0 |
| ATOM 8020 N SER C 107      | -60.510 | 19.009 | 7.872  | 1.00 | 49.81 | N0   |    |
| ANISOU 8020 N SER C 107    | 5280    | 7890   | 5750   | 670  | -590  | 1810 | N0 |
| ATOM 8021 CA SER C 107     | -60.617 | 19.406 | 6.439  | 1.00 | 51.76 | C0   |    |
| ANISOU 8021 CA SER C 107   | 5590    | 8170   | 5900   | 660  | -700  | 1960 | C0 |
| ATOM 8022 C SER C 107      | -60.144 | 20.853 | 6.223  | 1.00 | 53.39 | C0   |    |
| ANISOU 8022 C SER C 107    | 5950    | 8160   | 6170   | 770  | -720  | 2070 | C0 |
| ATOM 8023 O SER C 107      | -59.729 | 21.160 | 5.097  | 1.00 | 54.41 | O0   |    |
| ANISOU 8023 O SER C 107    | 6200    | 8270   | 6200   | 700  | -770  | 2190 | O0 |
| ATOM 8024 CB SER C 107     | -62.015 | 19.190 | 5.916  | 1.00 | 53.02 | C0   |    |
| ANISOU 8024 CB SER C 107   | 5590    | 8540   | 6020   | 730  | -820  | 2030 | C0 |
| ATOM 8025 OG SER C 107     | -62.959 | 19.960 | 6.639  | 1.00 | 54.21 | O0   |    |
| ANISOU 8025 OG SER C 107   | 5630    | 8680   | 6290   | 950  | -850  | 2030 | O0 |
| ATOM 8026 H SER C 107      | -61.320 | 18.792 | 8.228  | 1.00 | 50.24 | H0   |    |
| ANISOU 8026 H SER C 107    | 5210    | 8050   | 5830   | 730  | -610  | 1780 | H0 |
| ATOM 8027 HA SER C 107     | -60.009 | 18.815 | 5.924  | 1.00 | 51.01 | H0   |    |
| ANISOU 8027 HA SER C 107   | 5560    | 8110   | 5720   | 520  | -680  | 1950 | H0 |
| ATOM 8028 HB2 SER C 107    | -62.049 | 19.439 | 4.966  | 1.00 | 54.05 | H0   |    |
| ANISOU 8028 HB2 SER C 107  | 5770    | 8690   | 6080   | 720  | -890  | 2130 | H0 |
| ATOM 8029 HB3 SER C 107    | -62.246 | 18.236 | 5.990  | 1.00 | 52.41 | H0   |    |
| ANISOU 8029 HB3 SER C 107  | 5430    | 8590   | 5890   | 640  | -810  | 1960 | H0 |
| ATOM 8030 N ASP C 108      | -60.176 | 21.699 | 7.261  | 1.00 | 54.00 | N0   |    |
| ANISOU 8030 N ASP C 108    | 6050    | 8080   | 6390   | 910  | -670  | 2030 | N0 |
| ATOM 8031 CA ASP C 108     | -59.689 | 23.109 | 7.221  | 1.00 | 55.33 | C0   |    |
| ANISOU 8031 CA ASP C 108   | 6390    | 8000   | 6630   | 1010 | -690  | 2120 | C0 |
| ATOM 8032 C ASP C 108      | -58.163 | 23.162 | 7.414  | 1.00 | 54.20 | C0   |    |
| ANISOU 8032 C ASP C 108    | 6410    | 7710   | 6480   | 840  | -580  | 2070 | C0 |
| ATOM 8033 O ASP C 108      | -57.612 | 24.274 | 7.419  | 1.00 | 54.80 | O0   |    |
| ANISOU 8033 O ASP C 108    | 6640    | 7580   | 6600   | 880  | -580  | 2140 | O0 |
| ATOM 8034 CB ASP C 108     | -60.402 | 23.964 | 8.275  | 1.00 | 56.49 | C0   |    |
| ANISOU 8034 CB ASP C 108   | 6480    | 8050   | 6930   | 1240 | -690  | 2070 | C0 |
| ATOM 8035 CG ASP C 108     | -60.027 | 23.639 | 9.718  | 1.00 | 54.82 | C0   |    |
| ANISOU 8035 CG ASP C 108   | 6220    | 7800   | 6810   | 1230 | -560  | 1890 | C0 |
| ATOM 8036 OD1 ASP C 108    | -59.385 | 22.595 | 9.946  | 1.00 | 52.32 | O0   |    |
| ANISOU 8036 OD1 ASP C 108  | 5880    | 7560   | 6440   | 1050 | -470  | 1800 | O0 |
| ATOM 8037 OD2 ASP C 108    | -60.381 | 24.439 | 10.607 | 1.00 | 56.16 | O0   |    |
| ANISOU 8037 OD2 ASP C 108  | 6380    | 7850   | 7100   | 1400 | -540  | 1850 | O0 |
| ATOM 8038 H ASP C 108      | -60.522 | 21.462 | 8.068  | 1.00 | 53.47 | H0   |    |
| ANISOU 8038 H ASP C 108    | 5890    | 8050   | 6380   | 960  | -640  | 1940 | H0 |
| ATOM 8039 HA ASP C 108     | -59.902 | 23.480 | 6.333  | 1.00 | 56.65 | H0   |    |
| ANISOU 8039 HA ASP C 108   | 6600    | 8180   | 6740   | 1020 | -780  | 2240 | H0 |
| ATOM 8040 HB2 ASP C 108    | -60.193 | 24.907 | 8.111  | 1.00 | 57.53 | H0   |    |
| ANISOU 8040 HB2 ASP C 108  | 6740    | 8020   | 7100   | 1310 | -730  | 2140 | H0 |
| ATOM 8041 HB3 ASP C 108    | -61.369 | 23.846 | 8.177  | 1.00 | 57.32 | H0   |    |
| ANISOU 8041 HB3 ASP C 108  | 6460    | 8280   | 7040   | 1340 | -760  | 2090 | H0 |
| ATOM 8042 N GLY C 109      | -57.508 | 22.013 | 7.616  | 1.00 | 52.83 | N0   |    |
| ANISOU 8042 N GLY C 109    | 6190    | 7640   | 6240   | 680  | -490  | 1960 | N0 |
| ATOM 8043 CA GLY C 109     | -56.040 | 21.910 | 7.725  | 1.00 | 51.97 | C0   |    |
| ANISOU 8043 CA GLY C 109   | 6210    | 7430   | 6110   | 520  | -390  | 1900 | C0 |

|                           |         |        |        |      |           |    |
|---------------------------|---------|--------|--------|------|-----------|----|
| ATOM 8044 C GLY C 109     | -55.548 | 21.894 | 9.164  | 1.00 | 51.01     | C0 |
| ANISOU 8044 C GLY C 109   | 6080    | 7210   | 6100   | 530  | -280 1760 | C0 |
| ATOM 8045 O GLY C 109     | -54.321 | 21.804 | 9.348  | 1.00 | 49.81     | O0 |
| ANISOU 8045 O GLY C 109   | 6010    | 6990   | 5930   | 410  | -190 1700 | O0 |
| ATOM 8046 H GLY C 109     | -57.936 | 21.219 | 7.713  | 1.00 | 52.22     | H0 |
| ANISOU 8046 H GLY C 109   | 6010    | 7690   | 6140   | 650  | -490 1900 | H0 |
| ATOM 8047 HA2 GLY C 109   | -55.745 | 21.080 | 7.273  | 1.00 | 51.25     | H0 |
| ANISOU 8047 HA2 GLY C 109 | 6090    | 7460   | 5920   | 400  | -370 1870 | H0 |
| ATOM 8048 HA3 GLY C 109   | -55.628 | 22.674 | 7.249  | 1.00 | 52.85     | H0 |
| ANISOU 8048 HA3 GLY C 109 | 6440    | 7440   | 6200   | 500  | -410 1990 | H0 |
| ATOM 8049 N GLU C 110     | -56.444 | 21.974 | 10.156 | 1.00 | 51.90     | N0 |
| ANISOU 8049 N GLU C 110   | 6080    | 7330   | 6310   | 680  | -280 1690 | N0 |
| ATOM 8050 CA GLU C 110    | -56.064 | 21.916 | 11.596 | 1.00 | 51.54     | C0 |
| ANISOU 8050 CA GLU C 110  | 6020    | 7200   | 6370   | 700  | -170 1540 | C0 |
| ATOM 8051 C GLU C 110     | -55.495 | 20.525 | 11.894 | 1.00 | 49.09     | C0 |
| ANISOU 8051 C GLU C 110   | 5650    | 7010   | 5990   | 540  | -110 1420 | C0 |
| ATOM 8052 O GLU C 110     | -56.120 | 19.540 | 11.480 | 1.00 | 48.88     | O0 |
| ANISOU 8052 O GLU C 110   | 5520    | 7160   | 5890   | 500  | -150 1420 | O0 |
| ATOM 8053 CB GLU C 110    | -57.242 | 22.217 | 12.527 | 1.00 | 53.30     | C0 |
| ANISOU 8053 CB GLU C 110  | 6120    | 7440   | 6690   | 880  | -190 1490 | C0 |
| ATOM 8054 CG GLU C 110    | -56.793 | 22.623 | 13.925 | 1.00 | 53.79     | C0 |
| ANISOU 8054 CG GLU C 110  | 6210    | 7370   | 6860   | 930  | -90 1370  | C0 |
| ATOM 8055 CD GLU C 110    | -57.775 | 22.410 | 15.068 | 1.00 | 54.86     | C0 |
| ANISOU 8055 CD GLU C 110  | 6190    | 7590   | 7060   | 1050 | -60 1260  | C0 |
| ATOM 8056 OE1 GLU C 110   | -57.315 | 22.373 | 16.230 | 1.00 | 55.32     | O0 |
| ANISOU 8056 OE1 GLU C 110 | 6260    | 7580   | 7180   | 1030 | 30 1150   | O0 |
| ATOM 8057 OE2 GLU C 110   | -58.989 | 22.285 | 14.809 | 1.00 | 56.45     | O0 |
| ANISOU 8057 OE2 GLU C 110 | 6250    | 7940   | 7260   | 1150 | -130 1300 | O0 |
| ATOM 8058 H GLU C 110     | -57.338 | 22.066 | 10.012 | 1.00 | 52.77     | H0 |
| ANISOU 8058 H GLU C 110   | 6120    | 7500   | 6430   | 780  | -340 1730 | H0 |
| ATOM 8059 HA GLU C 110    | -55.359 | 22.585 | 11.754 | 1.00 | 51.59     | H0 |
| ANISOU 8059 HA GLU C 110  | 6130    | 7060   | 6410   | 680  | -140 1550 | H0 |
| ATOM 8060 HB2 GLU C 110   | -57.777 | 22.940 | 12.139 | 1.00 | 54.74     | H0 |
| ANISOU 8060 HB2 GLU C 110 | 6310    | 7590   | 6900   | 1000 | -250 1580 | H0 |
| ATOM 8061 HB3 GLU C 110   | -57.808 | 21.419 | 12.590 | 1.00 | 52.92     | H0 |
| ANISOU 8061 HB3 GLU C 110 | 5950    | 7550   | 6610   | 870  | -200 1460 | H0 |
| ATOM 8062 HG2 GLU C 110   | -55.972 | 22.131 | 14.141 | 1.00 | 52.49     | H0 |
| ANISOU 8062 HG2 GLU C 110 | 6080    | 7190   | 6670   | 800  | -30 1310  | H0 |
| ATOM 8063 HG3 GLU C 110   | -56.558 | 23.575 | 13.906 | 1.00 | 54.63     | H0 |
| ANISOU 8063 HG3 GLU C 110 | 6420    | 7320   | 7020   | 990  | -100 1410 | H0 |
| ATOM 8064 N VAL C 111     | -54.342 | 20.459 | 12.562 | 1.00 | 47.81     | N0 |
| ANISOU 8064 N VAL C 111   | 5560    | 6750   | 5850   | 460  | -10 1330  | N0 |
| ATOM 8065 CA VAL C 111    | -53.695 | 19.187 | 13.002 | 1.00 | 45.93     | C0 |
| ANISOU 8065 CA VAL C 111  | 5290    | 6600   | 5570   | 330  | 50 1210   | C0 |
| ATOM 8066 C VAL C 111     | -53.742 | 19.126 | 14.532 | 1.00 | 45.18     | C0 |
| ANISOU 8066 C VAL C 111   | 5150    | 6450   | 5570   | 380  | 110 1090  | C0 |
| ATOM 8067 O VAL C 111     | -53.298 | 20.097 | 15.174 | 1.00 | 44.97     | O0 |
| ANISOU 8067 O VAL C 111   | 5200    | 6270   | 5630   | 430  | 160 1070  | O0 |
| ATOM 8068 CB VAL C 111    | -52.253 | 19.064 | 12.474 | 1.00 | 45.14     | C0 |
| ANISOU 8068 CB VAL C 111  | 5290    | 6460   | 5400   | 190  | 90 1200   | C0 |
| ATOM 8069 CG1 VAL C 111   | -51.552 | 17.841 | 13.041 | 1.00 | 43.63     | C0 |
| ANISOU 8069 CG1 VAL C 111 | 5070    | 6330   | 5170   | 100  | 150 1060  | C0 |
| ATOM 8070 CG2 VAL C 111   | -52.211 | 19.046 | 10.953 | 1.00 | 45.91     | C0 |
| ANISOU 8070 CG2 VAL C 111 | 5430    | 6640   | 5380   | 130  | 30 1310   | C0 |



|                            |         |        |        |      |       |      |    |
|----------------------------|---------|--------|--------|------|-------|------|----|
| ATOM 8071 H VAL C 111      | -53.869 | 21.202 | 12.795 | 1.00 | 48.08 | H0   |    |
| ANISOU 8071 H VAL C 111    | 5680    | 6660   | 5930   | 470  | 10    | 1340 | H0 |
| ATOM 8072 HA VAL C 111     | -54.213 | 18.443 | 12.649 | 1.00 | 45.82 | H0   |    |
| ANISOU 8072 HA VAL C 111   | 5210    | 6700   | 5500   | 310  | 10    | 1210 | H0 |
| ATOM 8073 HB VAL C 111     | -51.757 | 19.863 | 12.780 | 1.00 | 45.44 | H0   |    |
| ANISOU 8073 HB VAL C 111   | 5400    | 6380   | 5490   | 200  | 130   | 1210 | H0 |
| ATOM 8074 HG11 VAL C 111   | -51.247 | 18.029 | 13.945 | 1.00 | 43.13 | H0   |    |
| ANISOU 8074 HG11 VAL C 111 | 5020    | 6200   | 5180   | 120  | 200   | 1000 | H0 |
| ATOM 8075 HG12 VAL C 111   | -50.787 | 17.615 | 12.483 | 1.00 | 43.44 | H0   |    |
| ANISOU 8075 HG12 VAL C 111 | 5090    | 6330   | 5090   | 20   | 160   | 1060 | H0 |
| ATOM 8076 HG13 VAL C 111   | -52.172 | 17.091 | 13.058 | 1.00 | 43.36 | H0   |    |
| ANISOU 8076 HG13 VAL C 111 | 4970    | 6390   | 5110   | 100  | 120   | 1040 | H0 |
| ATOM 8077 HG21 VAL C 111   | -52.722 | 18.287 | 10.623 | 1.00 | 45.78 | H0   |    |
| ANISOU 8077 HG21 VAL C 111 | 5350    | 6740   | 5310   | 120  | 0     | 1310 | H0 |
| ATOM 8078 HG22 VAL C 111   | -51.288 | 18.969 | 10.654 | 1.00 | 45.66 | H0   |    |
| ANISOU 8078 HG22 VAL C 111 | 5450    | 6600   | 5300   | 40   | 70    | 1300 | H0 |
| ATOM 8079 HG23 VAL C 111   | -52.594 | 19.870 | 10.607 | 1.00 | 47.05 | H0   |    |
| ANISOU 8079 HG23 VAL C 111 | 5610    | 6730   | 5550   | 190  | -10   | 1410 | H0 |
| ATOM 8080 N LEU C 112      | -54.273 | 18.026 | 15.076 | 1.00 | 44.80 | N0   |    |
| ANISOU 8080 N LEU C 112    | 5000    | 6520   | 5500   | 360  | 120   | 1010 | N0 |
| ATOM 8081 CA LEU C 112     | -54.316 | 17.722 | 16.530 | 1.00 | 44.65 | C0   |    |
| ANISOU 8081 CA LEU C 112   | 4940    | 6490   | 5540   | 370  | 180   | 890  | C0 |
| ATOM 8082 C LEU C 112      | -53.351 | 16.569 | 16.802 | 1.00 | 42.96 | C0   |    |
| ANISOU 8082 C LEU C 112    | 4760    | 6300   | 5270   | 230  | 220   | 790  | C0 |
| ATOM 8083 O LEU C 112      | -53.701 | 15.429 | 16.466 | 1.00 | 43.35 | O0   |    |
| ANISOU 8083 O LEU C 112    | 4760    | 6470   | 5240   | 160  | 180   | 780  | O0 |
| ATOM 8084 CB LEU C 112     | -55.736 | 17.313 | 16.944 | 1.00 | 45.80 | C0   |    |
| ANISOU 8084 CB LEU C 112   | 4940    | 6780   | 5690   | 430  | 150   | 880  | C0 |
| ATOM 8085 CG LEU C 112     | -56.821 | 18.388 | 16.896 | 1.00 | 48.18 | C0   |    |
| ANISOU 8085 CG LEU C 112   | 5170    | 7080   | 6060   | 600  | 110   | 940  | C0 |
| ATOM 8086 CD1 LEU C 112    | -56.394 | 19.628 | 17.657 | 1.00 | 49.25 | C0   |    |
| ANISOU 8086 CD1 LEU C 112  | 5380    | 7030   | 6300   | 710  | 170   | 910  | C0 |
| ATOM 8087 CD2 LEU C 112    | -57.202 | 18.740 | 15.464 | 1.00 | 49.38 | C0   |    |
| ANISOU 8087 CD2 LEU C 112  | 5330    | 7270   | 6160   | 630  | 20    | 1080 | C0 |
| ATOM 8088 H LEU C 112      | -54.654 | 17.374 | 14.567 | 1.00 | 44.86 | H0   |    |
| ANISOU 8088 H LEU C 112    | 4960    | 6640   | 5440   | 320  | 80    | 1030 | H0 |
| ATOM 8089 HA LEU C 112     | -54.028 | 18.515 | 17.037 | 1.00 | 44.81 | H0   |    |
| ANISOU 8089 HA LEU C 112   | 5000    | 6400   | 5630   | 420  | 220   | 870  | H0 |
| ATOM 8090 HB2 LEU C 112    | -56.016 | 16.575 | 16.368 | 1.00 | 45.73 | H0   |    |
| ANISOU 8090 HB2 LEU C 112  | 4890    | 6870   | 5610   | 370  | 110   | 900  | H0 |
| ATOM 8091 HB3 LEU C 112    | -55.694 | 16.966 | 17.857 | 1.00 | 45.23 | H0   |    |
| ANISOU 8091 HB3 LEU C 112  | 4840    | 6710   | 5640   | 410  | 190   | 800  | H0 |
| ATOM 8092 HG LEU C 112     | -57.626 | 18.024 | 17.340 | 1.00 | 48.40 | H0   |    |
| ANISOU 8092 HG LEU C 112   | 5090    | 7210   | 6080   | 620  | 110   | 910  | H0 |
| ATOM 8093 HD11 LEU C 112   | -55.993 | 19.366 | 18.504 | 1.00 | 48.23 | H0   |    |
| ANISOU 8093 HD11 LEU C 112 | 5260    | 6870   | 6190   | 670  | 220   | 820  | H0 |
| ATOM 8094 HD12 LEU C 112   | -57.171 | 20.189 | 17.827 | 1.00 | 50.11 | H0   |    |
| ANISOU 8094 HD12 LEU C 112 | 5440    | 7150   | 6460   | 830  | 150   | 920  | H0 |
| ATOM 8095 HD13 LEU C 112   | -55.744 | 20.127 | 17.132 | 1.00 | 49.16 | H0   |    |
| ANISOU 8095 HD13 LEU C 112 | 5470    | 6910   | 6290   | 690  | 160   | 960  | H0 |
| ATOM 8096 HD21 LEU C 112   | -56.556 | 19.369 | 15.100 | 1.00 | 49.52 | H0   |    |
| ANISOU 8096 HD21 LEU C 112 | 5450    | 7170   | 6200   | 640  | 30    | 1120 | H0 |
| ATOM 8097 HD22 LEU C 112   | -58.087 | 19.144 | 15.455 | 1.00 | 50.44 | H0   |    |
| ANISOU 8097 HD22 LEU C 112 | 5390    | 7450   | 6330   | 740  | -10   | 1110 | H0 |

|                            |         |        |        |      |       |      |    |
|----------------------------|---------|--------|--------|------|-------|------|----|
| ATOM 8098 HD23 LEU C 112   | -57.209 | 17.932 | 14.921 | 1.00 | 48.95 |      | H0 |
| ANISOU 8098 HD23 LEU C 112 | 5260    | 7310   | 6030   | 540  | 0     | 1090 | H0 |
| ATOM 8099 N TYR C 113      | -52.190 | 16.846 | 17.393 | 1.00 | 42.15 |      | N0 |
| ANISOU 8099 N TYR C 113    | 4730    | 6080   | 5200   | 200  | 280   | 730  | N0 |
| ATOM 8100 CA TYR C 113     | -51.216 | 15.805 | 17.810 | 1.00 | 40.98 |      | C0 |
| ANISOU 8100 CA TYR C 113   | 4620    | 5950   | 5010   | 100  | 310   | 630  | C0 |
| ATOM 8101 C TYR C 113      | -51.117 | 15.827 | 19.340 | 1.00 | 40.21 |      | C0 |
| ANISOU 8101 C TYR C 113    | 4510    | 5790   | 4980   | 120  | 360   | 530  | C0 |
| ATOM 8102 O TYR C 113      | -50.591 | 16.802 | 19.903 | 1.00 | 39.79 |      | O0 |
| ANISOU 8102 O TYR C 113    | 4500    | 5620   | 4990   | 150  | 410   | 510  | O0 |
| ATOM 8103 CB TYR C 113     | -49.877 | 15.996 | 17.091 | 1.00 | 41.05 |      | C0 |
| ANISOU 8103 CB TYR C 113   | 4710    | 5910   | 4980   | 30   | 330   | 640  | C0 |
| ATOM 8104 CG TYR C 113     | -48.827 | 14.994 | 17.496 | 1.00 | 40.63 |      | C0 |
| ANISOU 8104 CG TYR C 113   | 4680    | 5880   | 4880   | -40  | 360   | 520  | C0 |
| ATOM 8105 CD1 TYR C 113    | -49.089 | 13.631 | 17.476 | 1.00 | 40.53 |      | C0 |
| ANISOU 8105 CD1 TYR C 113  | 4640    | 5950   | 4810   | -80  | 310   | 470  | C0 |
| ATOM 8106 CD2 TYR C 113    | -47.576 | 15.410 | 17.923 | 1.00 | 40.71 |      | C0 |
| ANISOU 8106 CD2 TYR C 113  | 4730    | 5810   | 4920   | -80  | 410   | 470  | C0 |
| ATOM 8107 CE1 TYR C 113    | -48.133 | 12.707 | 17.870 | 1.00 | 40.29 |      | C0 |
| ANISOU 8107 CE1 TYR C 113  | 4640    | 5920   | 4740   | -130 | 320   | 370  | C0 |
| ATOM 8108 CE2 TYR C 113    | -46.612 | 14.500 | 18.323 | 1.00 | 40.25 |      | C0 |
| ANISOU 8108 CE2 TYR C 113  | 4690    | 5780   | 4830   | -120 | 420   | 360  | C0 |
| ATOM 8109 CZ TYR C 113     | -46.889 | 13.145 | 18.295 | 1.00 | 40.12 |      | C0 |
| ANISOU 8109 CZ TYR C 113   | 4650    | 5840   | 4750   | -140 | 380   | 310  | C0 |
| ATOM 8110 OH TYR C 113     | -45.926 | 12.258 | 18.685 | 1.00 | 40.47 |      | O0 |
| ANISOU 8110 OH TYR C 113   | 4720    | 5890   | 4770   | -170 | 370   | 210  | O0 |
| ATOM 8111 H TYR C 113      | -51.908 | 17.691 | 17.584 | 1.00 | 42.55 |      | H0 |
| ANISOU 8111 H TYR C 113    | 4830    | 6040   | 5300   | 240  | 300   | 740  | H0 |
| ATOM 8112 HA TYR C 113     | -51.578 | 14.924 | 17.544 | 1.00 | 40.78 |      | H0 |
| ANISOU 8112 HA TYR C 113   | 4560    | 6010   | 4930   | 60   | 270   | 620  | H0 |
| ATOM 8113 HB2 TYR C 113    | -50.028 | 15.927 | 16.125 | 1.00 | 41.58 |      | H0 |
| ANISOU 8113 HB2 TYR C 113  | 4780    | 6030   | 4990   | 10   | 300   | 700  | H0 |
| ATOM 8114 HB3 TYR C 113    | -49.547 | 16.900 | 17.280 | 1.00 | 41.49 |      | H0 |
| ANISOU 8114 HB3 TYR C 113  | 4800    | 5880   | 5080   | 50   | 360   | 650  | H0 |
| ATOM 8115 HD1 TYR C 113    | -49.935 | 13.326 | 17.194 | 1.00 | 40.84 |      | H0 |
| ANISOU 8115 HD1 TYR C 113  | 4650    | 6050   | 4820   | -80  | 270   | 510  | H0 |
| ATOM 8116 HD2 TYR C 113    | -47.380 | 16.332 | 17.953 | 1.00 | 41.17 |      | H0 |
| ANISOU 8116 HD2 TYR C 113  | 4820    | 5800   | 5020   | -60  | 440   | 500  | H0 |
| ATOM 8117 HE1 TYR C 113    | -48.327 | 11.785 | 17.848 | 1.00 | 39.93 |      | H0 |
| ANISOU 8117 HE1 TYR C 113  | 4600    | 5920   | 4650   | -150 | 290   | 340  | H0 |
| ATOM 8118 HE2 TYR C 113    | -45.765 | 14.802 | 18.608 | 1.00 | 40.13 |      | H0 |
| ANISOU 8118 HE2 TYR C 113  | 4690    | 5730   | 4830   | -140 | 460   | 330  | H0 |
| ATOM 8119 N MET C 114      | -51.641 | 14.785 | 19.988 | 1.00 | 40.30 |      | N0 |
| ANISOU 8119 N MET C 114    | 4470    | 5880   | 4960   | 80   | 350   | 480  | N0 |
| ATOM 8120 CA MET C 114     | -51.833 | 14.735 | 21.463 | 1.00 | 40.93 |      | C0 |
| ANISOU 8120 CA MET C 114   | 4520    | 5940   | 5080   | 100  | 390   | 390  | C0 |
| ATOM 8121 C MET C 114      | -51.205 | 13.456 | 22.009 | 1.00 | 38.01 |      | C0 |
| ANISOU 8121 C MET C 114    | 4190    | 5590   | 4660   | 0    | 390   | 310  | C0 |
| ATOM 8122 O MET C 114      | -51.897 | 12.595 | 22.535 | 1.00 | 37.38 |      | O0 |
| ANISOU 8122 O MET C 114    | 4070    | 5590   | 4540   | -50  | 360   | 290  | O0 |
| ATOM 8123 CB MET C 114     | -53.322 | 14.787 | 21.832 | 1.00 | 43.31 |      | C0 |
| ANISOU 8123 CB MET C 114   | 4720    | 6340   | 5400   | 150  | 380   | 410  | C0 |
| ATOM 8124 CG MET C 114     | -54.183 | 15.612 | 20.877 | 1.00 | 47.05 |      | C0 |
| ANISOU 8124 CG MET C 114   | 5130    | 6850   | 5890   | 250  | 350   | 510  | C0 |

|                           |         |        |        |      |       |     |    |
|---------------------------|---------|--------|--------|------|-------|-----|----|
| ATOM 8125 SD MET C 114    | -53.941 | 17.421 | 20.946 | 1.00 | 50.87 | S0  |    |
| ANISOU 8125 SD MET C 114  | 5670    | 7170   | 6490   | 390  | 380   | 550 | S0 |
| ATOM 8126 CE MET C 114    | -55.245 | 17.893 | 22.080 | 1.00 | 51.12 | C0  |    |
| ANISOU 8126 CE MET C 114  | 5580    | 7260   | 6580   | 510  | 410   | 500 | C0 |
| ATOM 8127 H MET C 114     | -51.916 | 14.030 | 19.559 | 1.00 | 40.28 | H0  |    |
| ANISOU 8127 H MET C 114   | 4450    | 5960   | 4900   | 40   | 310   | 480 | H0 |
| ATOM 8128 HA MET C 114    | -51.372 | 15.507 | 21.865 | 1.00 | 40.71 | H0  |    |
| ANISOU 8128 HA MET C 114  | 4530    | 5830   | 5110   | 130  | 430   | 380 | H0 |
| ATOM 8129 HB2 MET C 114   | -53.670 | 13.876 | 21.858 | 1.00 | 43.26 | H0  |    |
| ANISOU 8129 HB2 MET C 114 | 4680    | 6420   | 5340   | 90   | 350   | 400 | H0 |
| ATOM 8130 HB3 MET C 114   | -53.405 | 15.159 | 22.732 | 1.00 | 43.57 | H0  |    |
| ANISOU 8130 HB3 MET C 114 | 4740    | 6350   | 5470   | 190  | 420   | 370 | H0 |
| ATOM 8131 HG2 MET C 114   | -54.011 | 15.314 | 19.959 | 1.00 | 47.01 | H0  |    |
| ANISOU 8131 HG2 MET C 114 | 5150    | 6870   | 5840   | 210  | 310   | 560 | H0 |
| ATOM 8132 HG3 MET C 114   | -55.126 | 15.424 | 21.071 | 1.00 | 47.55 | H0  |    |
| ANISOU 8132 HG3 MET C 114 | 5110    | 7010   | 5950   | 270  | 330   | 520 | H0 |
| ATOM 8133 HE1 MET C 114   | -55.363 | 18.850 | 22.053 | 1.00 | 52.17 | H0  |    |
| ANISOU 8133 HE1 MET C 114 | 5740    | 7320   | 6770   | 610  | 420   | 510 | H0 |
| ATOM 8134 HE2 MET C 114   | -56.066 | 17.459 | 21.823 | 1.00 | 51.76 | H0  |    |
| ANISOU 8134 HE2 MET C 114 | 5580    | 7470   | 6620   | 520  | 380   | 520 | H0 |
| ATOM 8135 HE3 MET C 114   | -55.005 | 17.623 | 22.974 | 1.00 | 50.83 | H0  |    |
| ANISOU 8135 HE3 MET C 114 | 5550    | 7220   | 6540   | 480  | 460   | 420 | H0 |
| ATOM 8136 N PRO C 115     | -49.870 | 13.285 | 21.907 | 1.00 | 36.54 | N0  |    |
| ANISOU 8136 N PRO C 115   | 4080    | 5340   | 4460   | -40  | 400   | 270 | N0 |
| ATOM 8137 CA PRO C 115    | -49.203 | 12.108 | 22.458 | 1.00 | 35.95 | C0  |    |
| ANISOU 8137 CA PRO C 115  | 4050    | 5270   | 4340   | -110 | 380   | 180 | C0 |
| ATOM 8138 C PRO C 115     | -49.210 | 12.098 | 23.992 | 1.00 | 35.71 | C0  |    |
| ANISOU 8138 C PRO C 115   | 4020    | 5200   | 4340   | -110 | 410   | 120 | C0 |
| ATOM 8139 O PRO C 115     | -49.126 | 13.159 | 24.585 | 1.00 | 34.52 | O0  |    |
| ANISOU 8139 O PRO C 115   | 3860    | 4990   | 4260   | -60  | 470   | 110 | O0 |
| ATOM 8140 CB PRO C 115    | -47.760 | 12.254 | 21.966 | 1.00 | 35.44 | C0  |    |
| ANISOU 8140 CB PRO C 115  | 4040    | 5160   | 4270   | -120 | 390   | 150 | C0 |
| ATOM 8141 CG PRO C 115    | -47.584 | 13.745 | 21.840 | 1.00 | 36.20 | C0  |    |
| ANISOU 8141 CG PRO C 115  | 4130    | 5190   | 4430   | -70  | 450   | 200 | C0 |
| ATOM 8142 CD PRO C 115    | -48.916 | 14.222 | 21.294 | 1.00 | 37.34 | C0  |    |
| ANISOU 8142 CD PRO C 115  | 4230    | 5370   | 4590   | -20  | 430   | 290 | C0 |
| ATOM 8143 HA PRO C 115    | -49.608 | 11.282 | 22.094 | 1.00 | 35.91 | H0  |    |
| ANISOU 8143 HA PRO C 115  | 4040    | 5320   | 4280   | -140 | 330   | 190 | H0 |
| ATOM 8144 HB2 PRO C 115   | -47.124 | 11.878 | 22.612 | 1.00 | 35.14 | H0  |    |
| ANISOU 8144 HB2 PRO C 115 | 4030    | 5090   | 4230   | -130 | 400   | 90  | H0 |
| ATOM 8145 HB3 PRO C 115   | -47.635 | 11.811 | 21.100 | 1.00 | 35.62 | H0  |    |
| ANISOU 8145 HB3 PRO C 115 | 4070    | 5220   | 4240   | -130 | 360   | 170 | H0 |
| ATOM 8146 HG2 PRO C 115   | -47.397 | 14.151 | 22.711 | 1.00 | 36.13 | H0  |    |
| ANISOU 8146 HG2 PRO C 115 | 4130    | 5130   | 4470   | -60  | 480   | 160 | H0 |
| ATOM 8147 HG3 PRO C 115   | -46.855 | 13.962 | 21.223 | 1.00 | 36.30 | H0  |    |
| ANISOU 8147 HG3 PRO C 115 | 4170    | 5190   | 4430   | -90  | 450   | 210 | H0 |
| ATOM 8148 HD2 PRO C 115   | -49.100 | 15.140 | 21.563 | 1.00 | 37.54 | H0  |    |
| ANISOU 8148 HD2 PRO C 115 | 4250    | 5340   | 4670   | 20   | 460   | 310 | H0 |
| ATOM 8149 HD3 PRO C 115   | -48.941 | 14.162 | 20.321 | 1.00 | 37.36 | H0  |    |
| ANISOU 8149 HD3 PRO C 115 | 4230    | 5410   | 4560   | -30  | 400   | 340 | H0 |
| ATOM 8150 N SER C 116     | -49.314 | 10.908 | 24.581 | 1.00 | 36.03 | N0  |    |
| ANISOU 8150 N SER C 116   | 4090    | 5270   | 4330   | -180 | 370   | 70  | N0 |
| ATOM 8151 CA SER C 116    | -49.045 | 10.653 | 26.020 | 1.00 | 36.58 | C0  |    |
| ANISOU 8151 CA SER C 116  | 4190    | 5310   | 4400   | -200 | 390   | 0   | C0 |

|                            |         |        |        |      |       |      |    |
|----------------------------|---------|--------|--------|------|-------|------|----|
| ATOM 8152 C SER C 116      | -47.562 | 10.297 | 26.175 | 1.00 | 36.21 | C0   |    |
| ANISOU 8152 C SER C 116    | 4220    | 5190   | 4350   | -210 | 370   | -70  | C0 |
| ATOM 8153 O SER C 116      | -47.102 | 9.343  | 25.512 | 1.00 | 35.63 | O0   |    |
| ANISOU 8153 O SER C 116    | 4190    | 5130   | 4220   | -230 | 310   | -80  | O0 |
| ATOM 8154 CB SER C 116     | -49.938 | 9.577  | 26.569 | 1.00 | 37.03 | C0   |    |
| ANISOU 8154 CB SER C 116   | 4250    | 5430   | 4400   | -280 | 340   | 0    | C0 |
| ATOM 8155 OG SER C 116     | -49.759 | 9.448  | 27.972 | 1.00 | 37.57 | O0   |    |
| ANISOU 8155 OG SER C 116   | 4340    | 5470   | 4460   | -310 | 370   | -60  | O0 |
| ATOM 8156 H SER C 116      | -49.559 | 10.152 | 24.136 | 1.00 | 36.09 | H0   |    |
| ANISOU 8156 H SER C 116    | 4110    | 5320   | 4290   | -210 | 320   | 80   | H0 |
| ATOM 8157 HA SER C 116     | -49.221 | 11.493 | 26.522 | 1.00 | 36.71 | H0   |    |
| ANISOU 8157 HA SER C 116   | 4170    | 5300   | 4470   | -170 | 440   | 0    | H0 |
| ATOM 8158 HB2 SER C 116    | -50.877 | 9.800  | 26.376 | 1.00 | 37.58 | H0   |    |
| ANISOU 8158 HB2 SER C 116  | 4250    | 5560   | 4460   | -280 | 350   | 40   | H0 |
| ATOM 8159 HB3 SER C 116    | -49.729 | 8.721  | 26.130 | 1.00 | 36.98 | H0   |    |
| ANISOU 8159 HB3 SER C 116  | 4290    | 5420   | 4340   | -320 | 290   | 0    | H0 |
| ATOM 8160 N ILE C 117      | -46.845 | 11.064 | 26.996 | 1.00 | 36.57 | N0   |    |
| ANISOU 8160 N ILE C 117    | 4270    | 5180   | 4450   | -190 | 430   | -110 | N0 |
| ATOM 8161 CA ILE C 117     | -45.367 | 10.980 | 27.168 | 1.00 | 36.73 | C0   |    |
| ANISOU 8161 CA ILE C 117   | 4340    | 5150   | 4470   | -190 | 420   | -180 | C0 |
| ATOM 8162 C ILE C 117      | -45.038 | 10.733 | 28.644 | 1.00 | 37.03 | C0   |    |
| ANISOU 8162 C ILE C 117    | 4410    | 5160   | 4500   | -220 | 420   | -250 | C0 |
| ATOM 8163 O ILE C 117      | -45.583 | 11.446 | 29.514 | 1.00 | 36.17 | O0   |    |
| ANISOU 8163 O ILE C 117    | 4280    | 5030   | 4430   | -210 | 470   | -250 | O0 |
| ATOM 8164 CB ILE C 117     | -44.694 | 12.257 | 26.634 | 1.00 | 37.50 | C0   |    |
| ANISOU 8164 CB ILE C 117   | 4410    | 5210   | 4620   | -160 | 480   | -170 | C0 |
| ATOM 8165 CG1 ILE C 117    | -44.906 | 12.410 | 25.123 | 1.00 | 38.38 | C0   |    |
| ANISOU 8165 CG1 ILE C 117  | 4500    | 5360   | 4720   | -150 | 470   | -90  | C0 |
| ATOM 8166 CG2 ILE C 117    | -43.219 | 12.277 | 26.997 | 1.00 | 38.11 | C0   |    |
| ANISOU 8166 CG2 ILE C 117  | 4510    | 5270   | 4700   | -170 | 490   | -240 | C0 |
| ATOM 8167 CD1 ILE C 117    | -44.405 | 13.716 | 24.552 | 1.00 | 38.94 | C0   |    |
| ANISOU 8167 CD1 ILE C 117  | 4570    | 5390   | 4830   | -140 | 530   | -60  | C0 |
| ATOM 8168 H ILE C 117      | -47.227 | 11.704 | 27.520 | 1.00 | 36.78 | H0   |    |
| ANISOU 8168 H ILE C 117    | 4270    | 5190   | 4510   | -170 | 470   | -110 | H0 |
| ATOM 8169 HA ILE C 117     | -45.040 | 10.225 | 26.649 | 1.00 | 36.71 | H0   |    |
| ANISOU 8169 HA ILE C 117   | 4360    | 5170   | 4430   | -200 | 380   | -190 | H0 |
| ATOM 8170 HB ILE C 117     | -45.125 | 13.030 | 27.076 | 1.00 | 37.89 | H0   |    |
| ANISOU 8170 HB ILE C 117   | 4450    | 5230   | 4710   | -150 | 520   | -150 | H0 |
| ATOM 8171 HG12 ILE C 117   | -44.449 | 11.672 | 24.667 | 1.00 | 38.11 | H0   |    |
| ANISOU 8171 HG12 ILE C 117 | 4480    | 5360   | 4640   | -160 | 440   | -110 | H0 |
| ATOM 8172 HG13 ILE C 117   | -45.865 | 12.333 | 24.931 | 1.00 | 38.42 | H0   |    |
| ANISOU 8172 HG13 ILE C 117 | 4490    | 5390   | 4720   | -140 | 460   | -50  | H0 |
| ATOM 8173 HG21 ILE C 117   | -43.121 | 12.389 | 27.958 | 1.00 | 37.80 | H0   |    |
| ANISOU 8173 HG21 ILE C 117 | 4490    | 5200   | 4680   | -180 | 500   | -280 | H0 |
| ATOM 8174 HG22 ILE C 117   | -42.778 | 13.015 | 26.543 | 1.00 | 38.11 | H0   |    |
| ANISOU 8174 HG22 ILE C 117 | 4500    | 5260   | 4720   | -170 | 520   | -230 | H0 |
| ATOM 8175 HG23 ILE C 117   | -42.805 | 11.438 | 26.727 | 1.00 | 37.71 | H0   |    |
| ANISOU 8175 HG23 ILE C 117 | 4480    | 5250   | 4610   | -180 | 440   | -270 | H0 |
| ATOM 8176 HD11 ILE C 117   | -44.621 | 14.443 | 25.162 | 1.00 | 39.09 | H0   |    |
| ANISOU 8176 HD11 ILE C 117 | 4590    | 5360   | 4900   | -120 | 560   | -60  | H0 |
| ATOM 8177 HD12 ILE C 117   | -44.828 | 13.879 | 23.692 | 1.00 | 39.18 | H0   |    |
| ANISOU 8177 HD12 ILE C 117 | 4590    | 5450   | 4850   | -130 | 520   | 0    | H0 |
| ATOM 8178 HD13 ILE C 117   | -43.440 | 13.670 | 24.433 | 1.00 | 38.83 | H0   |    |
| ANISOU 8178 HD13 ILE C 117 | 4560    | 5390   | 4800   | -160 | 530   | -90  | H0 |

|                            |         |        |        |      |       |      |    |
|----------------------------|---------|--------|--------|------|-------|------|----|
| ATOM 8179 N ARG C 118      | -44.170 | 9.754  | 28.901 | 1.00 | 37.41 | N0   |    |
| ANISOU 8179 N ARG C 118    | 4510    | 5190   | 4510   | -230 | 360   | -300 | N0 |
| ATOM 8180 CA ARG C 118     | -43.433 | 9.615  | 30.179 | 1.00 | 37.09 | C0   |    |
| ANISOU 8180 CA ARG C 118   | 4510    | 5120   | 4460   | -240 | 350   | -370 | C0 |
| ATOM 8181 C ARG C 118      | -42.051 | 10.237 | 29.975 | 1.00 | 36.86 | C0   |    |
| ANISOU 8181 C ARG C 118    | 4460    | 5080   | 4470   | -210 | 370   | -420 | C0 |
| ATOM 8182 O ARG C 118      | -41.378 | 9.871  | 28.994 | 1.00 | 36.65 | O0   |    |
| ANISOU 8182 O ARG C 118    | 4420    | 5080   | 4420   | -190 | 340   | -430 | O0 |
| ATOM 8183 CB ARG C 118     | -43.325 | 8.152  | 30.606 | 1.00 | 38.13 | C0   |    |
| ANISOU 8183 CB ARG C 118   | 4720    | 5240   | 4520   | -270 | 250   | -390 | C0 |
| ATOM 8184 CG ARG C 118     | -42.548 | 7.954  | 31.899 | 1.00 | 38.85 | C0   |    |
| ANISOU 8184 CG ARG C 118   | 4860    | 5300   | 4600   | -280 | 220   | -460 | C0 |
| ATOM 8185 CD ARG C 118     | -42.563 | 6.510  | 32.348 | 1.00 | 40.00 | C0   |    |
| ANISOU 8185 CD ARG C 118   | 5110    | 5410   | 4670   | -310 | 110   | -460 | C0 |
| ATOM 8186 NE ARG C 118     | -41.863 | 6.352  | 33.617 | 1.00 | 41.70 | N0   |    |
| ANISOU 8186 NE ARG C 118   | 5380    | 5600   | 4870   | -320 | 70    | -510 | N0 |
| ATOM 8187 CZ ARG C 118     | -42.037 | 5.347  | 34.476 | 1.00 | 42.23 | C0   |    |
| ANISOU 8187 CZ ARG C 118   | 5550    | 5630   | 4860   | -370 | -20   | -510 | C0 |
| ATOM 8188 NH1 ARG C 118    | -42.901 | 4.378  | 34.221 | 1.00 | 42.71 | N0   |    |
| ANISOU 8188 NH1 ARG C 118  | 5680    | 5680   | 4870   | -420 | -80   | -460 | N0 |
| ATOM 8189 NH2 ARG C 118    | -41.347 | 5.322  | 35.601 | 1.00 | 42.53 | N0   |    |
| ANISOU 8189 NH2 ARG C 118  | 5630    | 5650   | 4880   | -380 | -50   | -550 | N0 |
| ATOM 8190 H ARG C 118      | -43.977 | 9.100  | 28.297 | 1.00 | 37.17 | H0   |    |
| ANISOU 8190 H ARG C 118    | 4500    | 5180   | 4450   | -220 | 310   | -300 | H0 |
| ATOM 8191 HA ARG C 118     | -43.912 | 10.116 | 30.874 | 1.00 | 37.38 | H0   |    |
| ANISOU 8191 HA ARG C 118   | 4530    | 5150   | 4520   | -260 | 390   | -370 | H0 |
| ATOM 8192 HB2 ARG C 118    | -44.229 | 7.791  | 30.720 | 1.00 | 38.15 | H0   |    |
| ANISOU 8192 HB2 ARG C 118  | 4740    | 5260   | 4500   | -310 | 230   | -360 | H0 |
| ATOM 8193 HB3 ARG C 118    | -42.886 | 7.648  | 29.891 | 1.00 | 38.04 | H0   |    |
| ANISOU 8193 HB3 ARG C 118  | 4730    | 5230   | 4490   | -240 | 200   | -400 | H0 |
| ATOM 8194 HG2 ARG C 118    | -41.618 | 8.237  | 31.768 | 1.00 | 38.87 | H0   |    |
| ANISOU 8194 HG2 ARG C 118  | 4850    | 5300   | 4620   | -250 | 220   | -500 | H0 |
| ATOM 8195 HG3 ARG C 118    | -42.939 | 8.513  | 32.603 | 1.00 | 38.96 | H0   |    |
| ANISOU 8195 HG3 ARG C 118  | 4860    | 5310   | 4630   | -310 | 270   | -450 | H0 |
| ATOM 8196 HD2 ARG C 118    | -43.493 | 6.215  | 32.447 | 1.00 | 40.25 | H0   |    |
| ANISOU 8196 HD2 ARG C 118  | 5160    | 5460   | 4670   | -360 | 100   | -420 | H0 |
| ATOM 8197 HD3 ARG C 118    | -42.135 | 5.950  | 31.667 | 1.00 | 40.18 | H0   |    |
| ANISOU 8197 HD3 ARG C 118  | 5160    | 5430   | 4680   | -270 | 50    | -480 | H0 |
| ATOM 8198 HE ARG C 118     | -41.284 | 6.965  | 33.833 | 1.00 | 41.33 | H0   |    |
| ANISOU 8198 HE ARG C 118   | 5290    | 5560   | 4850   | -300 | 100   | -550 | H0 |
| ATOM 8199 HH11 ARG C 118   | -43.369 | 4.384  | 33.479 | 1.00 | 42.49 | H0   |    |
| ANISOU 8199 HH11 ARG C 118 | 5630    | 5670   | 4850   | -420 | -60   | -430 | H0 |
| ATOM 8200 HH12 ARG C 118   | -43.005 | 3.723  | 34.799 | 1.00 | 42.95 | H0   |    |
| ANISOU 8200 HH12 ARG C 118 | 5790    | 5680   | 4850   | -470 | -140  | -450 | H0 |
| ATOM 8201 HH21 ARG C 118   | -40.768 | 5.961  | 35.777 | 1.00 | 42.38 | H0   |    |
| ANISOU 8201 HH21 ARG C 118 | 5560    | 5650   | 4900   | -350 | -10   | -590 | H0 |
| ATOM 8202 HH22 ARG C 118   | -41.457 | 4.658  | 36.170 | 1.00 | 42.81 | H0   |    |
| ANISOU 8202 HH22 ARG C 118 | 5740    | 5660   | 4870   | -410 | -110  | -540 | H0 |
| ATOM 8203 N GLN C 119      | -41.666 | 11.151 | 30.866 | 1.00 | 36.06 | N0   |    |
| ANISOU 8203 N GLN C 119    | 4350    | 4950   | 4410   | -230 | 420   | -450 | N0 |
| ATOM 8204 CA GLN C 119     | -40.406 | 11.923 | 30.779 | 1.00 | 35.59 | C0   |    |
| ANISOU 8204 CA GLN C 119   | 4260    | 4880   | 4380   | -230 | 460   | -500 | C0 |
| ATOM 8205 C GLN C 119      | -39.980 | 12.389 | 32.177 | 1.00 | 36.12 | C0   |    |
| ANISOU 8205 C GLN C 119    | 4350    | 4920   | 4460   | -260 | 470   | -560 | C0 |

|                            |         |        |        |      |       |      |    |
|----------------------------|---------|--------|--------|------|-------|------|----|
| ATOM 8206 O GLN C 119      | -40.866 | 12.731 | 32.991 | 1.00 | 35.63 | O0   |    |
| ANISOU 8206 O GLN C 119    | 4310    | 4830   | 4410   | -270 | 510   | -550 | O0 |
| ATOM 8207 CB GLN C 119     | -40.617 | 13.102 | 29.834 | 1.00 | 35.97 | C0   |    |
| ANISOU 8207 CB GLN C 119   | 4280    | 4920   | 4470   | -230 | 530   | -440 | C0 |
| ATOM 8208 CG GLN C 119     | -39.329 | 13.653 | 29.246 | 1.00 | 35.92 | C0   |    |
| ANISOU 8208 CG GLN C 119   | 4240    | 4940   | 4470   | -250 | 550   | -470 | C0 |
| ATOM 8209 CD GLN C 119     | -39.613 | 14.575 | 28.086 | 1.00 | 36.08 | C0   |    |
| ANISOU 8209 CD GLN C 119   | 4240    | 4940   | 4520   | -260 | 600   | -390 | C0 |
| ATOM 8210 OE1 GLN C 119    | -40.729 | 15.065 | 27.927 | 1.00 | 35.79 | O0   |    |
| ANISOU 8210 OE1 GLN C 119  | 4220    | 4860   | 4510   | -240 | 620   | -330 | O0 |
| ATOM 8211 NE2 GLN C 119    | -38.596 | 14.827 | 27.275 | 1.00 | 35.66 | N0   |    |
| ANISOU 8211 NE2 GLN C 119  | 4160    | 4940   | 4450   | -290 | 610   | -400 | N0 |
| ATOM 8212 H GLN C 119      | -42.169 | 11.360 | 31.596 | 1.00 | 36.19 | H0   |    |
| ANISOU 8212 H GLN C 119    | 4370    | 4950   | 4430   | -240 | 440   | -450 | H0 |
| ATOM 8213 HA GLN C 119     | -39.705 | 11.337 | 30.412 | 1.00 | 35.79 | H0   |    |
| ANISOU 8213 HA GLN C 119   | 4280    | 4940   | 4380   | -210 | 410   | -530 | H0 |
| ATOM 8214 HB2 GLN C 119    | -41.201 | 12.812 | 29.104 | 1.00 | 35.79 | H0   |    |
| ANISOU 8214 HB2 GLN C 119  | 4250    | 4910   | 4440   | -210 | 510   | -400 | H0 |
| ATOM 8215 HB3 GLN C 119    | -41.078 | 13.815 | 30.321 | 1.00 | 36.03 | H0   |    |
| ANISOU 8215 HB3 GLN C 119  | 4290    | 4880   | 4520   | -230 | 570   | -430 | H0 |
| ATOM 8216 HG2 GLN C 119    | -38.838 | 14.144 | 29.939 | 1.00 | 36.14 | H0   |    |
| ANISOU 8216 HG2 GLN C 119  | 4270    | 4940   | 4520   | -280 | 570   | -510 | H0 |
| ATOM 8217 HG3 GLN C 119    | -38.765 | 12.911 | 28.941 | 1.00 | 35.88 | H0   |    |
| ANISOU 8217 HG3 GLN C 119  | 4220    | 4980   | 4430   | -240 | 510   | -500 | H0 |
| ATOM 8218 HE21 GLN C 119   | -38.715 | 15.336 | 26.562 | 1.00 | 36.19 | H0   |    |
| ANISOU 8218 HE21 GLN C 119 | 4230    | 5010   | 4520   | -310 | 640   | -350 | H0 |
| ATOM 8219 HE22 GLN C 119   | -37.798 | 14.487 | 27.445 | 1.00 | 35.94 | H0   |    |
| ANISOU 8219 HE22 GLN C 119 | 4170    | 5020   | 4460   | -300 | 600   | -450 | H0 |
| ATOM 8220 N ARG C 120      | -38.667 | 12.383 | 32.422 | 1.00 | 36.59 | N0   |    |
| ANISOU 8220 N ARG C 120    | 4390    | 5000   | 4510   | -270 | 450   | -620 | N0 |
| ATOM 8221 CA AARG C 120    | -38.044 | 12.855 | 33.685 | 0.50 | 36.63 | C0   |    |
| ANISOU 8221 CA AARG C 120  | 4410    | 4990   | 4520   | -300 | 460   | -690 | C0 |
| ATOM 8222 CA BARG C 120    | -38.032 | 12.853 | 33.681 | 0.50 | 37.18 | C0   |    |
| ANISOU 8222 CA BARG C 120  | 4480    | 5060   | 4590   | -300 | 460   | -690 | C0 |
| ATOM 8223 C ARG C 120      | -37.591 | 14.307 | 33.495 | 1.00 | 37.00 | C0   |    |
| ANISOU 8223 C ARG C 120    | 4430    | 5010   | 4620   | -350 | 540   | -700 | C0 |
| ATOM 8224 O ARG C 120      | -37.077 | 14.625 | 32.409 | 1.00 | 36.56 | O0   |    |
| ANISOU 8224 O ARG C 120    | 4330    | 4980   | 4570   | -350 | 560   | -670 | O0 |
| ATOM 8225 CB AARG C 120    | -36.880 | 11.945 | 34.098 | 0.50 | 36.95 | C0   |    |
| ANISOU 8225 CB AARG C 120  | 4450    | 5080   | 4510   | -290 | 380   | -760 | C0 |
| ATOM 8226 CB BARG C 120    | -36.825 | 11.986 | 34.055 | 0.50 | 38.26 | C0   |    |
| ANISOU 8226 CB BARG C 120  | 4610    | 5250   | 4680   | -290 | 380   | -760 | C0 |
| ATOM 8227 CG AARG C 120    | -37.291 | 10.752 | 34.952 | 0.50 | 36.92 | C0   |    |
| ANISOU 8227 CG AARG C 120  | 4510    | 5060   | 4450   | -270 | 290   | -760 | C0 |
| ATOM 8228 CG BARG C 120    | -37.075 | 10.487 | 33.983 | 0.50 | 38.95 | C0   |    |
| ANISOU 8228 CG BARG C 120  | 4740    | 5340   | 4710   | -240 | 280   | -750 | C0 |
| ATOM 8229 CD AARG C 120    | -37.191 | 9.421  | 34.228 | 0.50 | 37.07 | C0   |    |
| ANISOU 8229 CD AARG C 120  | 4560    | 5100   | 4430   | -210 | 200   | -750 | C0 |
| ATOM 8230 CD BARG C 120    | -36.131 | 9.697  | 34.873 | 0.50 | 40.19 | C0   |    |
| ANISOU 8230 CD BARG C 120  | 4930    | 5520   | 4820   | -210 | 180   | -820 | C0 |
| ATOM 8231 NE AARG C 120    | -35.859 | 9.216  | 33.677 | 0.50 | 37.61 | N0   |    |
| ANISOU 8231 NE AARG C 120  | 4570    | 5230   | 4490   | -160 | 160   | -810 | N0 |
| ATOM 8232 NE BARG C 120    | -36.677 | 9.549  | 36.214 | 0.50 | 41.32 | N0   |    |
| ANISOU 8232 NE BARG C 120  | 5140    | 5620   | 4940   | -260 | 160   | -810 | N0 |

|                            |         |        |        |      |       |      |    |
|----------------------------|---------|--------|--------|------|-------|------|----|
| ATOM 8233 CZ AARG C 120    | -35.555 | 8.321  | 32.749 | 0.50 | 37.69 | C0   |    |
| ANISOU 8233 CZ AARG C 120  | 4570    | 5270   | 4480   | -80  | 100   | -830 | C0 |
| ATOM 8234 CZ BARG C 120    | -36.151 | 10.064 | 37.319 | 0.50 | 41.14 | C0   |    |
| ANISOU 8234 CZ BARG C 120  | 5120    | 5600   | 4910   | -300 | 170   | -860 | C0 |
| ATOM 8235 NH1AARG C 120    | -36.491 | 7.526  | 32.262 | 0.50 | 37.31 | N0   |    |
| ANISOU 8235 NH1AARG C 120  | 4590    | 5180   | 4410   | -70  | 70    | -780 | N0 |
| ATOM 8236 NH1BARG C 120    | -35.025 | 10.756 | 37.271 | 0.50 | 41.32 | N0   |    |
| ANISOU 8236 NH1BARG C 120  | 5070    | 5670   | 4960   | -310 | 190   | -920 | N0 |
| ATOM 8237 NH2AARG C 120    | -34.313 | 8.225  | 32.313 | 0.50 | 38.47 | N0   |    |
| ANISOU 8237 NH2AARG C 120  | 4600    | 5450   | 4570   | -30  | 80    | -900 | N0 |
| ATOM 8238 NH2BARG C 120    | -36.756 | 9.866  | 38.474 | 0.50 | 41.40 | N0   |    |
| ANISOU 8238 NH2BARG C 120  | 5220    | 5610   | 4900   | -350 | 150   | -850 | N0 |
| ATOM 8239 H ARG C 120      | -38.052 | 12.089 | 31.818 | 1.00 | 36.60 | H0   |    |
| ANISOU 8239 H ARG C 120    | 4370    | 5040   | 4500   | -250 | 430   | -640 | H0 |
| ATOM 8240 HA AARG C 120    | -38.726 | 12.829 | 34.391 | 0.50 | 36.65 | H0   |    |
| ANISOU 8240 HA AARG C 120  | 4450    | 4960   | 4520   | -320 | 470   | -680 | H0 |
| ATOM 8241 HA BARG C 120    | -38.696 | 12.808 | 34.403 | 0.50 | 37.13 | H0   |    |
| ANISOU 8241 HA BARG C 120  | 4510    | 5030   | 4570   | -320 | 470   | -690 | H0 |
| ATOM 8242 HB2AARG C 120    | -36.438 | 11.615 | 33.288 | 0.50 | 36.95 | H0   |    |
| ANISOU 8242 HB2AARG C 120  | 4410    | 5120   | 4500   | -260 | 360   | -760 | H0 |
| ATOM 8243 HB2BARG C 120    | -36.084 | 12.209 | 33.454 | 0.50 | 38.43 | H0   |    |
| ANISOU 8243 HB2BARG C 120  | 4580    | 5310   | 4710   | -280 | 390   | -780 | H0 |
| ATOM 8244 HB3AARG C 120    | -36.229 | 12.480 | 34.598 | 0.50 | 37.22 | H0   |    |
| ANISOU 8244 HB3AARG C 120  | 4460    | 5120   | 4560   | -320 | 390   | -800 | H0 |
| ATOM 8245 HB3BARG C 120    | -36.549 | 12.214 | 34.967 | 0.50 | 38.44 | H0   |    |
| ANISOU 8245 HB3BARG C 120  | 4650    | 5260   | 4700   | -320 | 380   | -790 | H0 |
| ATOM 8246 HG2AARG C 120    | -36.721 | 10.720 | 35.750 | 0.50 | 37.20 | H0   |    |
| ANISOU 8246 HG2AARG C 120  | 4560    | 5100   | 4470   | -290 | 260   | -810 | H0 |
| ATOM 8247 HG2BARG C 120    | -37.999 | 10.300 | 34.255 | 0.50 | 38.76 | H0   |    |
| ANISOU 8247 HG2BARG C 120  | 4760    | 5290   | 4680   | -250 | 280   | -710 | H0 |
| ATOM 8248 HG3AARG C 120    | -38.216 | 10.878 | 35.253 | 0.50 | 36.82 | H0   |    |
| ANISOU 8248 HG3AARG C 120  | 4530    | 5020   | 4440   | -300 | 320   | -730 | H0 |
| ATOM 8249 HG3BARG C 120    | -36.966 | 10.185 | 33.056 | 0.50 | 38.90 | H0   |    |
| ANISOU 8249 HG3BARG C 120  | 4710    | 5360   | 4700   | -200 | 270   | -740 | H0 |
| ATOM 8250 HD2AARG C 120    | -37.399 | 8.695  | 34.853 | 0.50 | 37.13 | H0   |    |
| ANISOU 8250 HD2AARG C 120  | 4630    | 5080   | 4400   | -210 | 140   | -750 | H0 |
| ATOM 8251 HD2BARG C 120    | -35.980 | 8.810  | 34.483 | 0.50 | 40.28 | H0   |    |
| ANISOU 8251 HD2BARG C 120  | 4960    | 5540   | 4810   | -160 | 120   | -820 | H0 |
| ATOM 8252 HD3AARG C 120    | -37.851 | 9.396  | 33.502 | 0.50 | 36.84 | H0   |    |
| ANISOU 8252 HD3AARG C 120  | 4530    | 5060   | 4410   | -210 | 220   | -710 | H0 |
| ATOM 8253 HD3BARG C 120    | -35.266 | 10.159 | 34.923 | 0.50 | 40.51 | H0   |    |
| ANISOU 8253 HD3BARG C 120  | 4910    | 5600   | 4880   | -220 | 200   | -860 | H0 |
| ATOM 8254 HE AARG C 120    | -35.214 | 9.725  | 33.971 | 0.50 | 37.79 | H0   |    |
| ANISOU 8254 HE AARG C 120  | 4550    | 5280   | 4530   | -170 | 180   | -850 | H0 |
| ATOM 8255 HE BARG C 120    | -37.423 | 9.105  | 36.297 | 0.50 | 40.80 | H0   |    |
| ANISOU 8255 HE BARG C 120  | 5120    | 5530   | 4850   | -270 | 150   | -780 | H0 |
| ATOM 8256 HH11AARG C 120   | -37.318 | 7.594  | 32.553 | 0.50 | 37.13 | H0   |    |
| ANISOU 8256 HH11AARG C 120 | 4600    | 5120   | 4380   | -110 | 80    | -730 | H0 |
| ATOM 8257 HH11BARG C 120   | -34.625 | 10.888 | 36.499 | 0.50 | 41.40 | H0   |    |
| ANISOU 8257 HH11BARG C 120 | 5030    | 5710   | 4990   | -280 | 200   | -920 | H0 |
| ATOM 8258 HH12AARG C 120   | -36.285 | 6.932  | 31.647 | 0.50 | 37.52 | H0   |    |
| ANISOU 8258 HH12AARG C 120 | 4620    | 5220   | 4410   | -20  | 30    | -790 | H0 |
| ATOM 8259 HH12BARG C 120   | -34.684 | 11.088 | 38.010 | 0.50 | 41.66 | H0   |    |
| ANISOU 8259 HH12BARG C 120 | 5120    | 5720   | 4990   | -340 | 190   | -950 | H0 |

|        |      |                |         |        |        |      |       |      |    |
|--------|------|----------------|---------|--------|--------|------|-------|------|----|
| ATOM   | 8260 | HH21AARG C 120 | -33.690 | 8.755  | 32.641 | 0.50 | 38.60 | H0   |    |
| ANISOU | 8260 | HH21AARG C 120 | 4560    | 5500   | 4600   | -50  | 100   | -930 | H0 |
| ATOM   | 8261 | HH21BARG C 120 | -37.504 | 9.401  | 38.501 | 0.50 | 41.23 | H0   |    |
| ANISOU | 8261 | HH21BARG C 120 | 5240    | 5570   | 4860   | -360 | 140   | -810 | H0 |
| ATOM   | 8262 | HH22AARG C 120 | -34.109 | 7.627  | 31.699 | 0.50 | 38.54 | H0   |    |
| ANISOU | 8262 | HH22AARG C 120 | 4600    | 5480   | 4560   | 30   | 40    | -920 | H0 |
| ATOM   | 8263 | HH22BARG C 120 | -36.411 | 10.196 | 39.213 | 0.50 | 41.62 | H0   |    |
| ANISOU | 8263 | HH22BARG C 120 | 5250    | 5640   | 4920   | -380 | 160   | -890 | H0 |
| ATOM   | 8264 | N PHE C 121    | -37.783 | 15.134 | 34.522 | 1.00 | 36.75 | N0   |    |
| ANISOU | 8264 | N PHE C 121    | 4430    | 4920   | 4610   | -380 | 590   | -730 | N0 |
| ATOM   | 8265 | CA PHE C 121   | -37.472 | 16.583 | 34.504 | 1.00 | 37.35 | C0   |    |
| ANISOU | 8265 | CA PHE C 121   | 4520    | 4940   | 4740   | -430 | 660   | -740 | C0 |
| ATOM   | 8266 | C PHE C 121    | -36.600 | 16.945 | 35.709 | 1.00 | 37.76 | C0   |    |
| ANISOU | 8266 | C PHE C 121    | 4580    | 4990   | 4780   | -500 | 650   | -820 | C0 |
| ATOM   | 8267 | O PHE C 121    | -36.791 | 16.381 | 36.809 | 1.00 | 37.54 | O0   |    |
| ANISOU | 8267 | O PHE C 121    | 4580    | 4970   | 4710   | -490 | 620   | -860 | O0 |
| ATOM   | 8268 | CB PHE C 121   | -38.773 | 17.388 | 34.487 | 1.00 | 38.03 | C0   |    |
| ANISOU | 8268 | CB PHE C 121   | 4640    | 4940   | 4870   | -400 | 720   | -690 | C0 |
| ATOM   | 8269 | CG PHE C 121   | -39.614 | 17.153 | 33.261 | 1.00 | 38.00 | C0   |    |
| ANISOU | 8269 | CG PHE C 121   | 4620    | 4940   | 4880   | -350 | 720   | -600 | C0 |
| ATOM   | 8270 | CD1 PHE C 121  | -40.571 | 16.151 | 33.238 | 1.00 | 37.97 | C0   |    |
| ANISOU | 8270 | CD1 PHE C 121  | 4600    | 4980   | 4850   | -300 | 690   | -570 | C0 |
| ATOM   | 8271 | CD2 PHE C 121  | -39.437 | 17.924 | 32.124 | 1.00 | 38.80 | C0   |    |
| ANISOU | 8271 | CD2 PHE C 121  | 4720    | 5010   | 5020   | -350 | 750   | -540 | C0 |
| ATOM   | 8272 | CE1 PHE C 121  | -41.332 | 15.927 | 32.100 | 1.00 | 38.34 | C0   |    |
| ANISOU | 8272 | CE1 PHE C 121  | 4620    | 5050   | 4900   | -260 | 680   | -490 | C0 |
| ATOM   | 8273 | CE2 PHE C 121  | -40.201 | 17.701 | 30.989 | 1.00 | 38.75 | C0   |    |
| ANISOU | 8273 | CE2 PHE C 121  | 4690    | 5020   | 5010   | -310 | 740   | -460 | C0 |
| ATOM   | 8274 | CZ PHE C 121   | -41.147 | 16.702 | 30.978 | 1.00 | 38.55 | C0   |    |
| ANISOU | 8274 | CZ PHE C 121   | 4640    | 5050   | 4960   | -260 | 700   | -430 | C0 |
| ATOM   | 8275 | H PHE C 121    | -38.125 | 14.864 | 35.323 | 1.00 | 36.83 | H0   |    |
| ANISOU | 8275 | H PHE C 121    | 4470    | 4920   | 4600   | -380 | 570   | -750 | H0 |
| ATOM   | 8276 | HA PHE C 121   | -36.964 | 16.787 | 33.678 | 1.00 | 37.57 | H0   |    |
| ANISOU | 8276 | HA PHE C 121   | 4520    | 4980   | 4770   | -450 | 660   | -710 | H0 |
| ATOM   | 8277 | HB2 PHE C 121  | -39.295 | 17.152 | 35.282 | 1.00 | 37.90 | H0   |    |
| ANISOU | 8277 | HB2 PHE C 121  | 4640    | 4920   | 4840   | -390 | 720   | -710 | H0 |
| ATOM   | 8278 | HB3 PHE C 121  | -38.551 | 18.340 | 34.544 | 1.00 | 38.50 | H0   |    |
| ANISOU | 8278 | HB3 PHE C 121  | 4720    | 4940   | 4970   | -430 | 760   | -700 | H0 |
| ATOM   | 8279 | HD1 PHE C 121  | -40.699 | 15.612 | 34.001 | 1.00 | 37.83 | H0   |    |
| ANISOU | 8279 | HD1 PHE C 121  | 4590    | 4980   | 4800   | -310 | 660   | -600 | H0 |
| ATOM   | 8280 | HD2 PHE C 121  | -38.788 | 18.610 | 32.123 | 1.00 | 39.20 | H0   |    |
| ANISOU | 8280 | HD2 PHE C 121  | 4780    | 5030   | 5080   | -400 | 770   | -560 | H0 |
| ATOM   | 8281 | HE1 PHE C 121  | -41.980 | 15.243 | 32.096 | 1.00 | 37.89 | H0   |    |
| ANISOU | 8281 | HE1 PHE C 121  | 4560    | 5020   | 4820   | -240 | 650   | -470 | H0 |
| ATOM   | 8282 | HE2 PHE C 121  | -40.074 | 18.234 | 30.227 | 1.00 | 39.11 | H0   |    |
| ANISOU | 8282 | HE2 PHE C 121  | 4740    | 5050   | 5070   | -320 | 750   | -410 | H0 |
| ATOM   | 8283 | HZ PHE C 121   | -41.671 | 16.553 | 30.207 | 1.00 | 38.41 | H0   |    |
| ANISOU | 8283 | HZ PHE C 121   | 4610    | 5050   | 4940   | -230 | 700   | -380 | H0 |
| ATOM   | 8284 | N SER C 122    | -35.660 | 17.864 | 35.488 | 1.00 | 38.08 | N0   |    |
| ANISOU | 8284 | N SER C 122    | 4610    | 5020   | 4840   | -570 | 680   | -850 | N0 |
| ATOM   | 8285 | CA SER C 122   | -34.943 | 18.621 | 36.542 | 1.00 | 39.06 | C0   |    |
| ANISOU | 8285 | CA SER C 122   | 4760    | 5120   | 4960   | -650 | 690   | -920 | C0 |
| ATOM   | 8286 | C SER C 122    | -35.765 | 19.871 | 36.869 | 1.00 | 39.97 | C0   |    |
| ANISOU | 8286 | C SER C 122    | 4960    | 5100   | 5130   | -660 | 770   | -920 | C0 |



|                           |         |        |        |      |       |       |    |
|---------------------------|---------|--------|--------|------|-------|-------|----|
| ATOM 8287 O SER C 122     | -35.843 | 20.765 | 36.006 | 1.00 | 40.94 | O0    |    |
| ANISOU 8287 O SER C 122   | 5110    | 5150   | 5300   | -680 | 810   | -870  | O0 |
| ATOM 8288 CB SER C 122    | -33.547 | 18.977 | 36.099 | 1.00 | 39.70 | C0    |    |
| ANISOU 8288 CB SER C 122  | 4780    | 5270   | 5030   | -740 | 690   | -950  | C0 |
| ATOM 8289 OG SER C 122    | -32.949 | 19.902 | 36.998 | 1.00 | 40.15 | O0    |    |
| ANISOU 8289 OG SER C 122  | 4880    | 5290   | 5090   | -840 | 710   | -1020 | O0 |
| ATOM 8290 H SER C 122     | -35.388 | 18.100 | 34.651 | 1.00 | 38.35 | H0    |    |
| ANISOU 8290 H SER C 122   | 4620    | 5060   | 4880   | -580 | 690   | -810  | H0 |
| ATOM 8291 HA SER C 122    | -34.886 | 18.053 | 37.356 | 1.00 | 38.91 | H0    |    |
| ANISOU 8291 HA SER C 122  | 4740    | 5130   | 4910   | -640 | 660   | -960  | H0 |
| ATOM 8292 HB2 SER C 122   | -33.000 | 18.161 | 36.056 | 1.00 | 39.38 | H0    |    |
| ANISOU 8292 HB2 SER C 122 | 4690    | 5320   | 4950   | -710 | 640   | -970  | H0 |
| ATOM 8293 HB3 SER C 122   | -33.580 | 19.372 | 35.198 | 1.00 | 39.74 | H0    |    |
| ANISOU 8293 HB3 SER C 122 | 4780    | 5260   | 5060   | -750 | 720   | -900  | H0 |
| ATOM 8294 N CYS C 123     | -36.396 | 19.916 | 38.043 | 1.00 | 39.91 | N0    |    |
| ANISOU 8294 N CYS C 123   | 5000    | 5050   | 5110   | -640 | 780   | -970  | N0 |
| ATOM 8295 CA CYS C 123    | -37.210 | 21.077 | 38.490 | 1.00 | 41.33 | C0    |    |
| ANISOU 8295 CA CYS C 123  | 5260    | 5100   | 5340   | -630 | 840   | -990  | C0 |
| ATOM 8296 C CYS C 123     | -37.269 | 21.128 | 40.022 | 1.00 | 40.78 | C0    |    |
| ANISOU 8296 C CYS C 123   | 5230    | 5040   | 5230   | -650 | 850   | -1090 | C0 |
| ATOM 8297 O CYS C 123     | -36.730 | 20.213 | 40.677 | 1.00 | 39.78 | O0    |    |
| ANISOU 8297 O CYS C 123   | 5070    | 5010   | 5040   | -680 | 790   | -1120 | O0 |
| ATOM 8298 CB CYS C 123    | -38.601 | 21.037 | 37.860 | 1.00 | 42.11 | C0    |    |
| ANISOU 8298 CB CYS C 123  | 5360    | 5170   | 5470   | -520 | 870   | -920  | C0 |
| ATOM 8299 SG CYS C 123    | -39.539 | 19.540 | 38.251 | 1.00 | 43.42 | S0    |    |
| ANISOU 8299 SG CYS C 123  | 5470    | 5450   | 5580   | -450 | 840   | -900  | S0 |
| ATOM 8300 H CYS C 123     | -36.379 | 19.240 | 38.654 | 1.00 | 39.82 | H0    |    |
| ANISOU 8300 H CYS C 123   | 4980    | 5090   | 5060   | -630 | 740   | -1000 | H0 |
| ATOM 8301 HA CYS C 123    | -36.759 | 21.894 | 38.175 | 1.00 | 41.81 | H0    |    |
| ANISOU 8301 HA CYS C 123  | 5350    | 5110   | 5430   | -680 | 860   | -990  | H0 |
| ATOM 8302 HB2 CYS C 123   | -39.114 | 21.811 | 38.165 | 1.00 | 42.99 | H0    |    |
| ANISOU 8302 HB2 CYS C 123 | 5520    | 5200   | 5620   | -490 | 910   | -940  | H0 |
| ATOM 8303 HB3 CYS C 123   | -38.512 | 21.101 | 36.887 | 1.00 | 42.25 | H0    |    |
| ANISOU 8303 HB3 CYS C 123 | 5360    | 5180   | 5510   | -510 | 870   | -860  | H0 |
| ATOM 8304 N ASP C 124     | -37.884 | 22.180 | 40.569 | 1.00 | 41.13 | N0    |    |
| ANISOU 8304 N ASP C 124   | 5350    | 4970   | 5300   | -640 | 910   | -1140 | N0 |
| ATOM 8305 CA ASP C 124    | -37.936 | 22.438 | 42.033 | 1.00 | 40.96 | C0    |    |
| ANISOU 8305 CA ASP C 124  | 5380    | 4950   | 5240   | -670 | 930   | -1240 | C0 |
| ATOM 8306 C ASP C 124     | -38.892 | 21.435 | 42.690 | 1.00 | 40.27 | C0    |    |
| ANISOU 8306 C ASP C 124   | 5250    | 4960   | 5090   | -610 | 920   | -1250 | C0 |
| ATOM 8307 O ASP C 124     | -40.116 | 21.556 | 42.479 | 1.00 | 40.57 | O0    |    |
| ANISOU 8307 O ASP C 124   | 5280    | 4980   | 5150   | -520 | 970   | -1220 | O0 |
| ATOM 8308 CB ASP C 124    | -38.344 | 23.883 | 42.322 | 1.00 | 42.12 | C0    |    |
| ANISOU 8308 CB ASP C 124  | 5620    | 4940   | 5440   | -650 | 990   | -1310 | C0 |
| ATOM 8309 CG ASP C 124    | -38.032 | 24.343 | 43.736 | 1.00 | 42.77 | C0    |    |
| ANISOU 8309 CG ASP C 124  | 5770    | 5010   | 5470   | -720 | 1010  | -1430 | C0 |
| ATOM 8310 OD1 ASP C 124   | -37.370 | 23.578 | 44.477 | 1.00 | 41.52 | O0    |    |
| ANISOU 8310 OD1 ASP C 124 | 5580    | 4960   | 5240   | -790 | 960   | -1470 | O0 |
| ATOM 8311 OD2 ASP C 124   | -38.441 | 25.472 | 44.076 | 1.00 | 43.89 | O0    |    |
| ANISOU 8311 OD2 ASP C 124 | 6000    | 5020   | 5650   | -690 | 1060  | -1500 | O0 |
| ATOM 8312 H ASP C 124     | -38.311 | 22.811 | 40.070 | 1.00 | 41.42 | H0    |    |
| ANISOU 8312 H ASP C 124   | 5420    | 4930   | 5390   | -600 | 940   | -1110 | H0 |
| ATOM 8313 HA ASP C 124    | -37.032 | 22.294 | 42.398 | 1.00 | 41.11 | H0    |    |
| ANISOU 8313 HA ASP C 124  | 5390    | 5010   | 5220   | -750 | 890   | -1280 | H0 |

|        |      |      |     |   |     |         |        |        |      |       |       |    |
|--------|------|------|-----|---|-----|---------|--------|--------|------|-------|-------|----|
| ATOM   | 8314 | HB2  | ASP | C | 124 | -37.881 | 24.476 | 41.697 | 1.00 | 42.43 | H0    |    |
| ANISOU | 8314 | HB2  | ASP | C | 124 | 5690    | 4910   | 5520   | -690 | 990   | -1280 | H0 |
| ATOM   | 8315 | HB3  | ASP | C | 124 | -39.307 | 23.980 | 42.174 | 1.00 | 42.16 | H0    |    |
| ANISOU | 8315 | HB3  | ASP | C | 124 | 5630    | 4920   | 5470   | -560 | 1020  | -1290 | H0 |
| ATOM   | 8316 | N    | VAL | C | 125 | -38.350 | 20.488 | 43.460 | 1.00 | 39.46 | N0    |    |
| ANISOU | 8316 | N    | VAL | C | 125 | 5130    | 4960   | 4900   | -670 | 860   | -1270 | N0 |
| ATOM   | 8317 | CA   | VAL | C | 125 | -39.131 | 19.481 | 44.240 | 1.00 | 39.33 | C0    |    |
| ANISOU | 8317 | CA   | VAL | C | 125 | 5100    | 5030   | 4810   | -650 | 850   | -1270 | C0 |
| ATOM   | 8318 | C    | VAL | C | 125 | -39.228 | 19.918 | 45.717 | 1.00 | 40.15 | C0    |    |
| ANISOU | 8318 | C    | VAL | C | 125 | 5260    | 5150   | 4840   | -700 | 880   | -1380 | C0 |
| ATOM   | 8319 | O    | VAL | C | 125 | -39.872 | 19.205 | 46.502 | 1.00 | 40.39 | O0    |    |
| ANISOU | 8319 | O    | VAL | C | 125 | 5290    | 5270   | 4790   | -710 | 880   | -1380 | O0 |
| ATOM   | 8320 | CB   | VAL | C | 125 | -38.508 | 18.081 | 44.076 | 1.00 | 38.34 | C0    |    |
| ANISOU | 8320 | CB   | VAL | C | 125 | 4940    | 5000   | 4620   | -670 | 750   | -1210 | C0 |
| ATOM   | 8321 | CG1  | VAL | C | 125 | -39.185 | 17.030 | 44.941 | 1.00 | 38.63 | C0    |    |
| ANISOU | 8321 | CG1  | VAL | C | 125 | 4990    | 5120   | 4560   | -690 | 720   | -1200 | C0 |
| ATOM   | 8322 | CG2  | VAL | C | 125 | -38.522 | 17.643 | 42.620 | 1.00 | 37.54 | C0    |    |
| ANISOU | 8322 | CG2  | VAL | C | 125 | 4790    | 4900   | 4580   | -620 | 720   | -1120 | C0 |
| ATOM   | 8323 | H    | VAL | C | 125 | -37.449 | 20.395 | 43.557 | 1.00 | 39.61 | H0    |    |
| ANISOU | 8323 | H    | VAL | C | 125 | 5150    | 5000   | 4910   | -720 | 830   | -1290 | H0 |
| ATOM   | 8324 | HA   | VAL | C | 125 | -40.034 | 19.452 | 43.876 | 1.00 | 39.13 | H0    |    |
| ANISOU | 8324 | HA   | VAL | C | 125 | 5060    | 5010   | 4800   | -590 | 880   | -1230 | H0 |
| ATOM   | 8325 | HB   | VAL | C | 125 | -37.564 | 18.142 | 44.362 | 1.00 | 38.63 | H0    |    |
| ANISOU | 8325 | HB   | VAL | C | 125 | 4980    | 5050   | 4650   | -720 | 710   | -1250 | H0 |
| ATOM   | 8326 | HG11 | VAL | C | 125 | -38.966 | 17.183 | 45.876 | 1.00 | 39.03 | H0    |    |
| ANISOU | 8326 | HG11 | VAL | C | 125 | 5080    | 5190   | 4560   | -730 | 720   | -1260 | H0 |
| ATOM   | 8327 | HG12 | VAL | C | 125 | -38.867 | 16.149 | 44.682 | 1.00 | 38.06 | H0    |    |
| ANISOU | 8327 | HG12 | VAL | C | 125 | 4910    | 5080   | 4460   | -690 | 650   | -1160 | H0 |
| ATOM   | 8328 | HG13 | VAL | C | 125 | -40.149 | 17.077 | 44.820 | 1.00 | 38.54 | H0    |    |
| ANISOU | 8328 | HG13 | VAL | C | 125 | 4970    | 5110   | 4560   | -650 | 760   | -1180 | H0 |
| ATOM   | 8329 | HG21 | VAL | C | 125 | -39.431 | 17.693 | 42.275 | 1.00 | 37.44 | H0    |    |
| ANISOU | 8329 | HG21 | VAL | C | 125 | 4770    | 4870   | 4590   | -570 | 760   | -1090 | H0 |
| ATOM   | 8330 | HG22 | VAL | C | 125 | -38.200 | 16.728 | 42.551 | 1.00 | 37.13 | H0    |    |
| ANISOU | 8330 | HG22 | VAL | C | 125 | 4720    | 4900   | 4490   | -620 | 660   | -1090 | H0 |
| ATOM   | 8331 | HG23 | VAL | C | 125 | -37.946 | 18.229 | 42.098 | 1.00 | 37.67 | H0    |    |
| ANISOU | 8331 | HG23 | VAL | C | 125 | 4800    | 4870   | 4640   | -630 | 730   | -1120 | H0 |
| ATOM   | 8332 | N    | SER | C | 126 | -38.646 | 21.059 | 46.090 | 1.00 | 40.74 | N0    |    |
| ANISOU | 8332 | N    | SER | C | 126 | 5390    | 5140   | 4950   | -740 | 910   | -1460 | N0 |
| ATOM   | 8333 | CA   | SER | C | 126 | -38.639 | 21.558 | 47.491 | 1.00 | 41.91 | C0    |    |
| ANISOU | 8333 | CA   | SER | C | 126 | 5600    | 5290   | 5030   | -800 | 950   | -1580 | C0 |
| ATOM   | 8334 | C    | SER | C | 126 | -40.080 | 21.820 | 47.944 | 1.00 | 42.56 | C0    |    |
| ANISOU | 8334 | C    | SER | C | 126 | 5690    | 5390   | 5090   | -720 | 1030  | -1620 | C0 |
| ATOM   | 8335 | O    | SER | C | 126 | -40.848 | 22.421 | 47.158 | 1.00 | 42.32 | O0    |    |
| ANISOU | 8335 | O    | SER | C | 126 | 5650    | 5280   | 5150   | -620 | 1090  | -1590 | O0 |
| ATOM   | 8336 | CB   | SER | C | 126 | -37.759 | 22.776 | 47.646 | 1.00 | 42.83 | C0    |    |
| ANISOU | 8336 | CB   | SER | C | 126 | 5780    | 5300   | 5180   | -860 | 960   | -1660 | C0 |
| ATOM   | 8337 | OG   | SER | C | 126 | -38.300 | 23.892 | 46.958 | 1.00 | 44.00 | O0    |    |
| ANISOU | 8337 | OG   | SER | C | 126 | 5970    | 5310   | 5430   | -790 | 1030  | -1660 | O0 |
| ATOM   | 8338 | H    | SER | C | 126 | -38.212 | 21.618 | 45.518 | 1.00 | 40.94 | H0    |    |
| ANISOU | 8338 | H    | SER | C | 126 | 5420    | 5100   | 5030   | -750 | 920   | -1450 | H0 |
| ATOM   | 8339 | HA   | SER | C | 126 | -38.265 | 20.836 | 48.063 | 1.00 | 41.74 | H0    |    |
| ANISOU | 8339 | HA   | SER | C | 126 | 5570    | 5350   | 4930   | -850 | 890   | -1580 | H0 |
| ATOM   | 8340 | HB2  | SER | C | 126 | -37.669 | 22.994 | 48.601 | 1.00 | 43.66 | H0    |    |
| ANISOU | 8340 | HB2  | SER | C | 126 | 5930    | 5420   | 5230   | -910 | 970   | -1740 | H0 |

|        |      |      |     |   |     |         |        |        |      |       |       |    |
|--------|------|------|-----|---|-----|---------|--------|--------|------|-------|-------|----|
| ATOM   | 8341 | HB3  | SER | C | 126 | -36.862 | 22.577 | 47.292 | 1.00 | 42.65 | H0    |    |
| ANISOU | 8341 | HB3  | SER | C | 126 | 5740    | 5300   | 5170   | -920 | 910   | -1630 | H0 |
| ATOM   | 8342 | N    | GLY | C | 127 | -40.435 | 21.330 | 49.140 | 1.00 | 43.05 | N0    |    |
| ANISOU | 8342 | N    | GLY | C | 127 | 5760    | 5550   | 5040   | -760 | 1040  | -1670 | N0 |
| ATOM   | 8343 | CA   | GLY | C | 127 | -41.759 | 21.492 | 49.770 | 1.00 | 43.40 | C0    |    |
| ANISOU | 8343 | CA   | GLY | C | 127 | 5790    | 5660   | 5040   | -700 | 1130  | -1730 | C0 |
| ATOM   | 8344 | C    | GLY | C | 127 | -42.770 | 20.442 | 49.325 | 1.00 | 42.94 | C0    |    |
| ANISOU | 8344 | C    | GLY | C | 127 | 5650    | 5710   | 4960   | -660 | 1130  | -1630 | C0 |
| ATOM   | 8345 | O    | GLY | C | 127 | -43.941 | 20.566 | 49.722 | 1.00 | 43.24 | O0    |    |
| ANISOU | 8345 | O    | GLY | C | 127 | 5650    | 5820   | 4960   | -620 | 1200  | -1670 | O0 |
| ATOM   | 8346 | H    | GLY | C | 127 | -39.852 | 20.850 | 49.650 | 1.00 | 42.82 | H0    |    |
| ANISOU | 8346 | H    | GLY | C | 127 | 5740    | 5580   | 4950   | -830 | 990   | -1680 | H0 |
| ATOM   | 8347 | HA2  | GLY | C | 127 | -41.651 | 21.441 | 50.753 | 1.00 | 44.16 | H0    |    |
| ANISOU | 8347 | HA2  | GLY | C | 127 | 5920    | 5810   | 5050   | -770 | 1130  | -1790 | H0 |
| ATOM   | 8348 | HA3  | GLY | C | 127 | -42.108 | 22.392 | 49.551 | 1.00 | 44.19 | H0    |    |
| ANISOU | 8348 | HA3  | GLY | C | 127 | 5910    | 5670   | 5210   | -640 | 1180  | -1770 | H0 |
| ATOM   | 8349 | N    | VAL | C | 128 | -42.365 | 19.441 | 48.534 | 1.00 | 42.03 | N0    |    |
| ANISOU | 8349 | N    | VAL | C | 128 | 5500    | 5610   | 4850   | -680 | 1040  | -1510 | N0 |
| ATOM   | 8350 | CA   | VAL | C | 128 | -43.303 | 18.442 | 47.934 | 1.00 | 41.52 | C0    |    |
| ANISOU | 8350 | CA   | VAL | C | 128 | 5370    | 5630   | 4770   | -650 | 1030  | -1410 | C0 |
| ATOM   | 8351 | C    | VAL | C | 128 | -44.049 | 17.696 | 49.054 | 1.00 | 42.37 | C0    |    |
| ANISOU | 8351 | C    | VAL | C | 128 | 5480    | 5890   | 4730   | -730 | 1040  | -1420 | C0 |
| ATOM   | 8352 | O    | VAL | C | 128 | -45.223 | 17.327 | 48.843 | 1.00 | 42.18 | O0    |    |
| ANISOU | 8352 | O    | VAL | C | 128 | 5390    | 5950   | 4690   | -700 | 1080  | -1390 | O0 |
| ATOM   | 8353 | CB   | VAL | C | 128 | -42.575 | 17.462 | 46.993 | 1.00 | 40.41 | C0    |    |
| ANISOU | 8353 | CB   | VAL | C | 128 | 5220    | 5480   | 4650   | -670 | 920   | -1300 | C0 |
| ATOM   | 8354 | CG1  | VAL | C | 128 | -41.645 | 16.527 | 47.748 | 1.00 | 40.49 | C0    |    |
| ANISOU | 8354 | CG1  | VAL | C | 128 | 5280    | 5530   | 4570   | -770 | 820   | -1290 | C0 |
| ATOM   | 8355 | CG2  | VAL | C | 128 | -43.554 | 16.668 | 46.145 | 1.00 | 39.45 | C0    |    |
| ANISOU | 8355 | CG2  | VAL | C | 128 | 5040    | 5410   | 4540   | -630 | 910   | -1200 | C0 |
| ATOM   | 8356 | H    | VAL | C | 128 | -41.493 | 19.306 | 48.312 | 1.00 | 41.57 | H0    |    |
| ANISOU | 8356 | H    | VAL | C | 128 | 5460    | 5520   | 4810   | -720 | 980   | -1490 | H0 |
| ATOM   | 8357 | HA   | VAL | C | 128 | -43.962 | 18.930 | 47.409 | 1.00 | 41.74 | H0    |    |
| ANISOU | 8357 | HA   | VAL | C | 128 | 5360    | 5640   | 4860   | -580 | 1080  | -1400 | H0 |
| ATOM   | 8358 | HB   | VAL | C | 128 | -42.022 | 18.002 | 46.379 | 1.00 | 40.14 | H0    |    |
| ANISOU | 8358 | HB   | VAL | C | 128 | 5190    | 5360   | 4700   | -640 | 920   | -1290 | H0 |
| ATOM   | 8359 | HG11 | VAL | C | 128 | -41.186 | 17.020 | 48.450 | 1.00 | 40.95 | H0    |    |
| ANISOU | 8359 | HG11 | VAL | C | 128 | 5380    | 5580   | 4600   | -800 | 830   | -1360 | H0 |
| ATOM   | 8360 | HG12 | VAL | C | 128 | -40.989 | 16.155 | 47.133 | 1.00 | 39.80 | H0    |    |
| ANISOU | 8360 | HG12 | VAL | C | 128 | 5190    | 5420   | 4510   | -760 | 760   | -1240 | H0 |
| ATOM   | 8361 | HG13 | VAL | C | 128 | -42.161 | 15.804 | 48.145 | 1.00 | 40.50 | H0    |    |
| ANISOU | 8361 | HG13 | VAL | C | 128 | 5290    | 5610   | 4490   | -810 | 800   | -1260 | H0 |
| ATOM   | 8362 | HG21 | VAL | C | 128 | -44.013 | 16.015 | 46.701 | 1.00 | 39.77 | H0    |    |
| ANISOU | 8362 | HG21 | VAL | C | 128 | 5080    | 5530   | 4490   | -680 | 900   | -1180 | H0 |
| ATOM   | 8363 | HG22 | VAL | C | 128 | -43.072 | 16.209 | 45.436 | 1.00 | 38.87 | H0    |    |
| ANISOU | 8363 | HG22 | VAL | C | 128 | 4970    | 5310   | 4490   | -630 | 850   | -1140 | H0 |
| ATOM   | 8364 | HG23 | VAL | C | 128 | -44.207 | 17.273 | 45.751 | 1.00 | 39.83 | H0    |    |
| ANISOU | 8364 | HG23 | VAL | C | 128 | 5050    | 5440   | 4640   | -560 | 970   | -1200 | H0 |
| ATOM   | 8365 | N    | ASP | C | 129 | -43.412 | 17.518 | 50.215 | 1.00 | 43.22 | N0    |    |
| ANISOU | 8365 | N    | ASP | C | 129 | 5650    | 6030   | 4740   | -830 | 1010  | -1480 | N0 |
| ATOM   | 8366 | CA   | ASP | C | 129 | -43.946 | 16.708 | 51.344 | 1.00 | 44.08 | C0    |    |
| ANISOU | 8366 | CA   | ASP | C | 129 | 5780    | 6280   | 4690   | -930 | 1010  | -1480 | C0 |
| ATOM   | 8367 | C    | ASP | C | 129 | -44.737 | 17.595 | 52.318 | 1.00 | 45.21 | C0    |    |
| ANISOU | 8367 | C    | ASP | C | 129 | 5910    | 6500   | 4780   | -920 | 1130  | -1610 | C0 |

|                            |         |        |        |       |       |          |
|----------------------------|---------|--------|--------|-------|-------|----------|
| ATOM 8368 O ASP C 129      | -45.149 | 17.079 | 53.363 | 1.00  | 45.51 | O0       |
| ANISOU 8368 O ASP C 129    | 5960    | 6670   | 4660   | -1020 | 1140  | -1630 O0 |
| ATOM 8369 CB ASP C 129     | -42.806 | 15.931 | 52.006 | 1.00  | 44.39 | C0       |
| ANISOU 8369 CB ASP C 129   | 5900    | 6330   | 4640   | -1040 | 890   | -1460 C0 |
| ATOM 8370 CG ASP C 129     | -42.057 | 15.067 | 51.004 | 1.00  | 44.12 | C0       |
| ANISOU 8370 CG ASP C 129   | 5870    | 6230   | 4660   | -1010 | 770   | -1350 C0 |
| ATOM 8371 OD1 ASP C 129    | -42.711 | 14.218 | 50.363 | 1.00  | 44.01 | O0       |
| ANISOU 8371 OD1 ASP C 129  | 5830    | 6250   | 4650   | -1000 | 740   | -1250 O0 |
| ATOM 8372 OD2 ASP C 129    | -40.837 | 15.281 | 50.835 | 1.00  | 44.90 | O0       |
| ANISOU 8372 OD2 ASP C 129  | 5990    | 6260   | 4810   | -1010 | 700   | -1370 O0 |
| ATOM 8373 H ASP C 129      | -42.592 | 17.876 | 50.385 | 1.00  | 43.21 | H0       |
| ANISOU 8373 H ASP C 129    | 5690    | 5970   | 4760   | -840  | 980   | -1520 H0 |
| ATOM 8374 HA ASP C 129     | -44.571 | 16.045 | 50.967 | 1.00  | 43.78 | H0       |
| ANISOU 8374 HA ASP C 129   | 5700    | 6300   | 4630   | -930  | 1000  | -1410 H0 |
| ATOM 8375 HB2 ASP C 129    | -42.177 | 16.560 | 52.412 | 1.00  | 44.85 | H0       |
| ANISOU 8375 HB2 ASP C 129  | 5990    | 6350   | 4710   | -1040 | 890   | -1530 H0 |
| ATOM 8376 HB3 ASP C 129    | -43.168 | 15.356 | 52.710 | 1.00  | 44.98 | H0       |
| ANISOU 8376 HB3 ASP C 129  | 5990    | 6490   | 4600   | -1110 | 880   | -1450 H0 |
| ATOM 8377 N THR C 130      | -44.966 | 18.867 | 51.973 | 1.00  | 45.73 | N0       |
| ANISOU 8377 N THR C 130    | 5950    | 6480   | 4950   | -810  | 1220  | -1700 N0 |
| ATOM 8378 CA THR C 130     | -45.728 | 19.849 | 52.792 | 1.00  | 47.73 | C0       |
| ANISOU 8378 CA THR C 130   | 6190    | 6780   | 5170   | -760  | 1340  | -1850 C0 |
| ATOM 8379 C THR C 130      | -47.124 | 20.018 | 52.178 | 1.00  | 48.62 | C0       |
| ANISOU 8379 C THR C 130    | 6190    | 6960   | 5330   | -640  | 1420  | -1830 C0 |
| ATOM 8380 O THR C 130      | -47.335 | 19.523 | 51.045 | 1.00  | 48.49 | O0       |
| ANISOU 8380 O THR C 130    | 6120    | 6920   | 5380   | -600  | 1380  | -1710 O0 |
| ATOM 8381 CB THR C 130     | -44.960 | 21.175 | 52.910 | 1.00  | 47.96 | C0       |
| ANISOU 8381 CB THR C 130   | 6300    | 6640   | 5280   | -710  | 1360  | -1960 C0 |
| ATOM 8382 OG1 THR C 130    | -45.096 | 21.934 | 51.710 | 1.00  | 47.20 | O0       |
| ANISOU 8382 OG1 THR C 130  | 6180    | 6400   | 5350   | -580  | 1380  | -1930 O0 |
| ATOM 8383 CG2 THR C 130    | -43.484 | 20.981 | 53.182 | 1.00  | 47.28 | C0       |
| ANISOU 8383 CG2 THR C 130  | 6300    | 6490   | 5180   | -820  | 1260  | -1950 C0 |
| ATOM 8384 H THR C 130      | -44.663 | 19.233 | 51.199 | 1.00  | 45.30 | H0       |
| ANISOU 8384 H THR C 130    | 5890    | 6320   | 5000   | -750  | 1200  | -1680 H0 |
| ATOM 8385 HA THR C 130     | -45.833 | 19.473 | 53.696 | 1.00  | 48.25 | H0       |
| ANISOU 8385 HA THR C 130   | 6270    | 6950   | 5110   | -840  | 1350  | -1880 H0 |
| ATOM 8386 HB THR C 130     | -45.351 | 21.690 | 53.656 | 1.00  | 49.08 | H0       |
| ANISOU 8386 HB THR C 130   | 6450    | 6820   | 5370   | -700  | 1430  | -2070 H0 |
| ATOM 8387 HG21 THR C 130   | -43.369 | 20.373 | 53.933 | 1.00  | 47.48 | H0       |
| ANISOU 8387 HG21 THR C 130 | 6340    | 6610   | 5090   | -910  | 1230  | -1950 H0 |
| ATOM 8388 HG22 THR C 130   | -43.078 | 21.840 | 53.395 | 1.00  | 47.92 | H0       |
| ANISOU 8388 HG22 THR C 130 | 6430    | 6480   | 5290   | -810  | 1280  | -2030 H0 |
| ATOM 8389 HG23 THR C 130   | -43.053 | 20.606 | 52.393 | 1.00  | 46.29 | H0       |
| ANISOU 8389 HG23 THR C 130 | 6160    | 6320   | 5110   | -820  | 1200  | -1850 H0 |
| ATOM 8390 N GLU C 131      | -48.032 | 20.689 | 52.888 | 1.00  | 49.99 | N0       |
| ANISOU 8390 N GLU C 131    | 6320    | 7220   | 5450   | -580  | 1540  | -1960 N0 |
| ATOM 8391 CA GLU C 131     | -49.422 | 20.953 | 52.430 | 1.00  | 51.42 | C0       |
| ANISOU 8391 CA GLU C 131   | 6370    | 7490   | 5670   | -450  | 1620  | -1980 C0 |
| ATOM 8392 C GLU C 131      | -49.400 | 21.942 | 51.256 | 1.00  | 50.50 | C0       |
| ANISOU 8392 C GLU C 131    | 6260    | 7190   | 5740   | -270  | 1620  | -1970 C0 |
| ATOM 8393 O GLU C 131      | -50.276 | 21.824 | 50.377 | 1.00  | 49.51 | O0       |
| ANISOU 8393 O GLU C 131    | 6030    | 7110   | 5670   | -170  | 1640  | -1900 O0 |
| ATOM 8394 CB GLU C 131     | -50.279 | 21.487 | 53.580 | 1.00  | 55.00 | C0       |
| ANISOU 8394 CB GLU C 131   | 6780    | 8100   | 6020   | -420  | 1750  | -2140 C0 |

|                           |         |        |        |      |       |       |    |
|---------------------------|---------|--------|--------|------|-------|-------|----|
| ATOM 8395 CG GLU C 131    | -50.583 | 20.455 | 54.653 | 1.00 | 56.58 | C0    |    |
| ANISOU 8395 CG GLU C 131  | 6960    | 8530   | 6010   | -600 | 1760  | -2130 | C0 |
| ATOM 8396 CD GLU C 131    | -51.388 | 21.004 | 55.822 | 1.00 | 60.45 | C0    |    |
| ANISOU 8396 CD GLU C 131  | 7400    | 9190   | 6380   | -580 | 1890  | -2310 | C0 |
| ATOM 8397 OE1 GLU C 131   | -52.602 | 21.256 | 55.640 | 1.00 | 62.23 | O0    |    |
| ANISOU 8397 OE1 GLU C 131 | 7480    | 9560   | 6610   | -470 | 1980  | -2360 | O0 |
| ATOM 8398 OE2 GLU C 131   | -50.794 | 21.201 | 56.911 | 1.00 | 62.22 | O0    |    |
| ANISOU 8398 OE2 GLU C 131 | 7720    | 9420   | 6500   | -670 | 1900  | -2400 | O0 |
| ATOM 8399 H GLU C 131     | -47.847 | 21.031 | 53.712 | 1.00 | 51.01 | H0    |    |
| ANISOU 8399 H GLU C 131   | 6490    | 7370   | 5520   | -610 | 1570  | -2050 | H0 |
| ATOM 8400 HA GLU C 131    | -49.809 | 20.104 | 52.116 | 1.00 | 50.89 | H0    |    |
| ANISOU 8400 HA GLU C 131  | 6250    | 7520   | 5560   | -500 | 1600  | -1880 | H0 |
| ATOM 8401 HB2 GLU C 131   | -49.814 | 22.245 | 53.991 | 1.00 | 55.45 | H0    |    |
| ANISOU 8401 HB2 GLU C 131 | 6910    | 8060   | 6090   | -390 | 1760  | -2240 | H0 |
| ATOM 8402 HB3 GLU C 131   | -51.125 | 21.818 | 53.211 | 1.00 | 55.51 | H0    |    |
| ANISOU 8402 HB3 GLU C 131 | 6760    | 8210   | 6120   | -300 | 1800  | -2160 | H0 |
| ATOM 8403 HG2 GLU C 131   | -51.083 | 19.713 | 54.251 | 1.00 | 56.27 | H0    |    |
| ANISOU 8403 HG2 GLU C 131 | 6850    | 8580   | 5950   | -640 | 1740  | -2040 | H0 |
| ATOM 8404 HG3 GLU C 131   | -49.739 | 20.093 | 54.997 | 1.00 | 56.11 | H0    |    |
| ANISOU 8404 HG3 GLU C 131 | 6990    | 8420   | 5910   | -710 | 1690  | -2100 | H0 |
| ATOM 8405 N SER C 132     | -48.447 | 22.882 | 51.252 | 1.00 | 50.03 | N0    |    |
| ANISOU 8405 N SER C 132   | 6320    | 6930   | 5760   | -240 | 1610  | -2030 | N0 |
| ATOM 8406 CA SER C 132    | -48.223 | 23.874 | 50.165 | 1.00 | 49.92 | C0    |    |
| ANISOU 8406 CA SER C 132  | 6350    | 6700   | 5920   | -110 | 1590  | -2010 | C0 |
| ATOM 8407 C SER C 132     | -47.700 | 23.167 | 48.908 | 1.00 | 47.67 | C0    |    |
| ANISOU 8407 C SER C 132   | 6050    | 6360   | 5700   | -140 | 1490  | -1840 | C0 |
| ATOM 8408 O SER C 132     | -47.992 | 23.652 | 47.798 | 1.00 | 47.60 | O0    |    |
| ANISOU 8408 O SER C 132   | 6020    | 6250   | 5810   | -30  | 1490  | -1780 | O0 |
| ATOM 8409 CB SER C 132    | -47.276 | 24.964 | 50.601 | 1.00 | 50.63 | C0    |    |
| ANISOU 8409 CB SER C 132  | 6580    | 6610   | 6050   | -120 | 1590  | -2120 | C0 |
| ATOM 8410 OG SER C 132    | -47.803 | 25.673 | 51.708 | 1.00 | 53.42 | O0    |    |
| ANISOU 8410 OG SER C 132  | 6950    | 7000   | 6340   | -70  | 1680  | -2300 | O0 |
| ATOM 8411 H SER C 132     | -47.856 | 22.988 | 51.937 | 1.00 | 50.38 | H0    |    |
| ANISOU 8411 H SER C 132   | 6430    | 6950   | 5750   | -320 | 1600  | -2090 | H0 |
| ATOM 8412 HA SER C 132    | -49.100 | 24.290 | 49.944 | 1.00 | 50.68 | H0    |    |
| ANISOU 8412 HA SER C 132  | 6380    | 6820   | 6050   | 20   | 1640  | -2050 | H0 |
| ATOM 8413 HB2 SER C 132   | -46.410 | 24.566 | 50.847 | 1.00 | 50.13 | H0    |    |
| ANISOU 8413 HB2 SER C 132 | 6570    | 6540   | 5950   | -240 | 1540  | -2090 | H0 |
| ATOM 8414 HB3 SER C 132   | -47.127 | 25.586 | 49.853 | 1.00 | 50.85 | H0    |    |
| ANISOU 8414 HB3 SER C 132 | 6650    | 6490   | 6180   | -40  | 1570  | -2100 | H0 |
| ATOM 8415 N GLY C 133     | -46.927 | 22.092 | 49.083 | 1.00 | 45.82 | N0    |    |
| ANISOU 8415 N GLY C 133   | 5830    | 6180   | 5390   | -300 | 1420  | -1760 | N0 |
| ATOM 8416 CA GLY C 133    | -46.384 | 21.272 | 47.983 | 1.00 | 44.34 | C0    |    |
| ANISOU 8416 CA GLY C 133  | 5630    | 5960   | 5250   | -340 | 1330  | -1610 | C0 |
| ATOM 8417 C GLY C 133     | -45.228 | 21.952 | 47.266 | 1.00 | 43.61 | C0    |    |
| ANISOU 8417 C GLY C 133   | 5620    | 5680   | 5270   | -330 | 1280  | -1590 | C0 |
| ATOM 8418 O GLY C 133     | -44.787 | 23.036 | 47.718 | 1.00 | 43.95 | O0    |    |
| ANISOU 8418 O GLY C 133   | 5740    | 5610   | 5340   | -320 | 1310  | -1690 | O0 |
| ATOM 8419 H GLY C 133     | -46.678 | 21.805 | 49.911 | 1.00 | 46.21 | H0    |    |
| ANISOU 8419 H GLY C 133   | 5910    | 6290   | 5360   | -380 | 1420  | -1800 | H0 |
| ATOM 8420 HA2 GLY C 133   | -46.080 | 20.404 | 48.347 | 1.00 | 43.71 | H0    |    |
| ANISOU 8420 HA2 GLY C 133 | 5550    | 5960   | 5100   | -430 | 1280  | -1570 | H0 |
| ATOM 8421 HA3 GLY C 133   | -47.109 | 21.093 | 47.333 | 1.00 | 44.09 | H0    |    |
| ANISOU 8421 HA3 GLY C 133 | 5530    | 5970   | 5250   | -270 | 1340  | -1550 | H0 |

|                            |         |        |        |      |       |       |    |
|----------------------------|---------|--------|--------|------|-------|-------|----|
| ATOM 8422 N ALA C 134      | -44.758 | 21.326 | 46.187 | 1.00 | 42.09 | N0    |    |
| ANISOU 8422 N ALA C 134    | 5400    | 5470   | 5120   | -350 | 1210  | -1460 | N0 |
| ATOM 8423 CA ALA C 134     | -43.692 | 21.826 | 45.293 | 1.00 | 42.30 | C0    |    |
| ANISOU 8423 CA ALA C 134   | 5480    | 5350   | 5240   | -360 | 1160  | -1420 | C0 |
| ATOM 8424 C ALA C 134      | -44.330 | 22.477 | 44.064 | 1.00 | 42.89 | C0    |    |
| ANISOU 8424 C ALA C 134    | 5530    | 5340   | 5420   | -240 | 1180  | -1360 | C0 |
| ATOM 8425 O ALA C 134      | -45.453 | 22.091 | 43.710 | 1.00 | 43.25 | O0    |    |
| ANISOU 8425 O ALA C 134    | 5500    | 5470   | 5470   | -160 | 1200  | -1320 | O0 |
| ATOM 8426 CB ALA C 134     | -42.796 | 20.681 | 44.889 | 1.00 | 41.25 | C0    |    |
| ANISOU 8426 CB ALA C 134   | 5330    | 5270   | 5070   | -450 | 1070  | -1330 | C0 |
| ATOM 8427 H ALA C 134      | -45.077 | 20.518 | 45.914 | 1.00 | 41.72 | H0    |    |
| ANISOU 8427 H ALA C 134    | 5310    | 5500   | 5040   | -360 | 1180  | -1400 | H0 |
| ATOM 8428 HA ALA C 134     | -43.160 | 22.501 | 45.774 | 1.00 | 42.93 | H0    |    |
| ANISOU 8428 HA ALA C 134   | 5620    | 5360   | 5330   | -390 | 1170  | -1490 | H0 |
| ATOM 8429 HB1 ALA C 134    | -42.075 | 21.014 | 44.328 | 1.00 | 40.96 | H0    |    |
| ANISOU 8429 HB1 ALA C 134  | 5310    | 5160   | 5090   | -460 | 1040  | -1310 | H0 |
| ATOM 8430 HB2 ALA C 134    | -42.420 | 20.266 | 45.684 | 1.00 | 41.19 | H0    |    |
| ANISOU 8430 HB2 ALA C 134  | 5340    | 5320   | 4990   | -520 | 1040  | -1370 | H0 |
| ATOM 8431 HB3 ALA C 134    | -43.312 | 20.022 | 44.395 | 1.00 | 40.64 | H0    |    |
| ANISOU 8431 HB3 ALA C 134  | 5200    | 5250   | 4990   | -420 | 1050  | -1270 | H0 |
| ATOM 8432 N THR C 135      | -43.626 | 23.421 | 43.439 | 1.00 | 44.02 | N0    |    |
| ANISOU 8432 N THR C 135    | 5750    | 5330   | 5650   | -230 | 1170  | -1360 | N0 |
| ATOM 8433 CA THR C 135     | -43.956 | 23.969 | 42.098 | 1.00 | 44.61 | C0    |    |
| ANISOU 8433 CA THR C 135   | 5820    | 5300   | 5830   | -140 | 1170  | -1270 | C0 |
| ATOM 8434 C THR C 135      | -42.836 | 23.581 | 41.123 | 1.00 | 43.69 | C0    |    |
| ANISOU 8434 C THR C 135    | 5710    | 5170   | 5730   | -230 | 1100  | -1170 | C0 |
| ATOM 8435 O THR C 135      | -41.785 | 24.247 | 41.125 | 1.00 | 44.27 | O0    |    |
| ANISOU 8435 O THR C 135    | 5850    | 5140   | 5820   | -310 | 1090  | -1200 | O0 |
| ATOM 8436 CB THR C 135     | -44.213 | 25.479 | 42.153 | 1.00 | 46.01 | C0    |    |
| ANISOU 8436 CB THR C 135   | 6090    | 5310   | 6080   | -60  | 1210  | -1340 | C0 |
| ATOM 8437 OG1 THR C 135    | -45.124 | 25.725 | 43.222 | 1.00 | 47.92 | O0    |    |
| ANISOU 8437 OG1 THR C 135  | 6320    | 5600   | 6290   | 20   | 1280  | -1450 | O0 |
| ATOM 8438 CG2 THR C 135    | -44.793 | 26.010 | 40.860 | 1.00 | 46.53 | C0    |    |
| ANISOU 8438 CG2 THR C 135  | 6160    | 5280   | 6240   | 60   | 1200  | -1240 | C0 |
| ATOM 8439 H THR C 135      | -42.881 | 23.803 | 43.797 | 1.00 | 44.20 | H0    |    |
| ANISOU 8439 H THR C 135    | 5830    | 5300   | 5670   | -290 | 1170  | -1400 | H0 |
| ATOM 8440 HA THR C 135     | -44.784 | 23.536 | 41.798 | 1.00 | 44.28 | H0    |    |
| ANISOU 8440 HA THR C 135   | 5710    | 5340   | 5780   | -80  | 1180  | -1230 | H0 |
| ATOM 8441 HB THR C 135     | -43.361 | 25.939 | 42.340 | 1.00 | 46.51 | H0    |    |
| ANISOU 8441 HB THR C 135   | 6230    | 5290   | 6150   | -130 | 1200  | -1370 | H0 |
| ATOM 8442 HG21 THR C 135   | -44.120 | 25.966 | 40.158 | 1.00 | 45.95 | H0    |    |
| ANISOU 8442 HG21 THR C 135 | 6110    | 5170   | 6180   | 0    | 1170  | -1170 | H0 |
| ATOM 8443 HG22 THR C 135   | -45.070 | 26.936 | 40.984 | 1.00 | 47.63 | H0    |    |
| ANISOU 8443 HG22 THR C 135 | 6370    | 5310   | 6420   | 130  | 1230  | -1290 | H0 |
| ATOM 8444 HG23 THR C 135   | -45.564 | 25.473 | 40.604 | 1.00 | 46.13 | H0    |    |
| ANISOU 8444 HG23 THR C 135 | 6020    | 5330   | 6180   | 120  | 1210  | -1200 | H0 |
| ATOM 8445 N CYS C 136      | -43.058 | 22.523 | 40.341 | 1.00 | 43.10 | N0    |    |
| ANISOU 8445 N CYS C 136    | 5550    | 5190   | 5630   | -220 | 1060  | -1070 | N0 |
| ATOM 8446 CA CYS C 136     | -42.168 | 22.066 | 39.241 | 1.00 | 43.08 | C0    |    |
| ANISOU 8446 CA CYS C 136   | 5530    | 5200   | 5640   | -280 | 1010  | -980  | C0 |
| ATOM 8447 C CYS C 136      | -42.523 | 22.843 | 37.965 | 1.00 | 43.01 | C0    |    |
| ANISOU 8447 C CYS C 136    | 5540    | 5090   | 5720   | -210 | 1010  | -900  | C0 |
| ATOM 8448 O CYS C 136      | -43.686 | 22.747 | 37.517 | 1.00 | 42.31 | O0    |    |
| ANISOU 8448 O CYS C 136    | 5400    | 5030   | 5650   | -110 | 1030  | -860  | O0 |

|                            |         |        |        |      |       |       |    |
|----------------------------|---------|--------|--------|------|-------|-------|----|
| ATOM 8449 CB CYS C 136     | -42.305 | 20.561 | 39.040 | 1.00 | 43.24 | C0    |    |
| ANISOU 8449 CB CYS C 136   | 5470    | 5360   | 5600   | -290 | 960   | -930  | C0 |
| ATOM 8450 SG CYS C 136     | -41.435 | 19.928 | 37.584 | 1.00 | 45.01 | S0    |    |
| ANISOU 8450 SG CYS C 136   | 5660    | 5610   | 5830   | -330 | 890   | -830  | S0 |
| ATOM 8451 H CYS C 136      | -43.793 | 21.993 | 40.429 | 1.00 | 42.98 | H0    |    |
| ANISOU 8451 H CYS C 136    | 5480    | 5260   | 5590   | -180 | 1070  | -1060 | H0 |
| ATOM 8452 HA CYS C 136     | -41.237 | 22.267 | 39.492 | 1.00 | 43.14 | H0    |    |
| ANISOU 8452 HA CYS C 136   | 5570    | 5180   | 5640   | -350 | 990   | -1020 | H0 |
| ATOM 8453 HB2 CYS C 136    | -41.958 | 20.101 | 39.832 | 1.00 | 43.38 | H0    |    |
| ANISOU 8453 HB2 CYS C 136  | 5490    | 5430   | 5560   | -340 | 940   | -970  | H0 |
| ATOM 8454 HB3 CYS C 136    | -43.254 | 20.336 | 38.954 | 1.00 | 43.54 | H0    |    |
| ANISOU 8454 HB3 CYS C 136  | 5470    | 5440   | 5630   | -240 | 970   | -910  | H0 |
| ATOM 8455 N ARG C 137      | -41.570 | 23.615 | 37.431 | 1.00 | 43.52 | N0    |    |
| ANISOU 8455 N ARG C 137    | 5670    | 5050   | 5820   | -270 | 1010  | -890  | N0 |
| ATOM 8456 CA ARG C 137     | -41.741 | 24.428 | 36.196 | 1.00 | 44.06 | C0    |    |
| ANISOU 8456 CA ARG C 137   | 5780    | 5010   | 5950   | -240 | 1000  | -800  | C0 |
| ATOM 8457 C ARG C 137      | -41.096 | 23.688 | 35.019 | 1.00 | 42.79 | C0    |    |
| ANISOU 8457 C ARG C 137    | 5560    | 4940   | 5770   | -300 | 960   | -700  | C0 |
| ATOM 8458 O ARG C 137      | -39.921 | 23.290 | 35.129 | 1.00 | 42.22 | O0    |    |
| ANISOU 8458 O ARG C 137    | 5470    | 4920   | 5650   | -410 | 940   | -720  | O0 |
| ATOM 8459 CB ARG C 137     | -41.170 | 25.835 | 36.391 | 1.00 | 45.63 | C0    |    |
| ANISOU 8459 CB ARG C 137   | 6110    | 5030   | 6200   | -290 | 1020  | -840  | C0 |
| ATOM 8460 CG ARG C 137     | -41.827 | 26.593 | 37.537 | 1.00 | 47.46 | C0    |    |
| ANISOU 8460 CG ARG C 137   | 6410    | 5180   | 6450   | -210 | 1060  | -950  | C0 |
| ATOM 8461 CD ARG C 137     | -41.536 | 28.080 | 37.545 | 1.00 | 49.14 | C0    |    |
| ANISOU 8461 CD ARG C 137   | 6780    | 5170   | 6720   | -230 | 1070  | -980  | C0 |
| ATOM 8462 NE ARG C 137     | -41.617 | 28.650 | 38.887 | 1.00 | 50.77 | N0    |    |
| ANISOU 8462 NE ARG C 137   | 7050    | 5310   | 6920   | -220 | 1110  | -1120 | N0 |
| ATOM 8463 CZ ARG C 137     | -42.738 | 28.976 | 39.532 | 1.00 | 51.89 | C0    |    |
| ANISOU 8463 CZ ARG C 137   | 7200    | 5430   | 7080   | -70  | 1150  | -1200 | C0 |
| ATOM 8464 NH1 ARG C 137    | -43.923 | 28.794 | 38.972 | 1.00 | 52.37 | N0    |    |
| ANISOU 8464 NH1 ARG C 137  | 7190    | 5530   | 7180   | 90   | 1150  | -1140 | N0 |
| ATOM 8465 NH2 ARG C 137    | -42.669 | 29.491 | 40.748 | 1.00 | 52.58 | N0    |    |
| ANISOU 8465 NH2 ARG C 137  | 7360    | 5470   | 7150   | -80  | 1180  | -1340 | N0 |
| ATOM 8466 H ARG C 137      | -40.741 | 23.691 | 37.801 | 1.00 | 43.53 | H0    |    |
| ANISOU 8466 H ARG C 137    | 5690    | 5050   | 5800   | -360 | 1000  | -920  | H0 |
| ATOM 8467 HA ARG C 137     | -42.704 | 24.511 | 36.020 | 1.00 | 44.26 | H0    |    |
| ANISOU 8467 HA ARG C 137   | 5790    | 5030   | 6000   | -140 | 1020  | -770  | H0 |
| ATOM 8468 HB2 ARG C 137    | -40.209 | 25.764 | 36.565 | 1.00 | 45.61 | H0    |    |
| ANISOU 8468 HB2 ARG C 137  | 6110    | 5050   | 6170   | -400 | 1010  | -860  | H0 |
| ATOM 8469 HB3 ARG C 137    | -41.292 | 26.341 | 35.562 | 1.00 | 46.22 | H0    |    |
| ANISOU 8469 HB3 ARG C 137  | 6220    | 5030   | 6310   | -270 | 1010  | -770  | H0 |
| ATOM 8470 HG2 ARG C 137    | -42.798 | 26.465 | 37.488 | 1.00 | 47.35 | H0    |    |
| ANISOU 8470 HG2 ARG C 137  | 6350    | 5190   | 6450   | -100 | 1080  | -940  | H0 |
| ATOM 8471 HG3 ARG C 137    | -41.522 | 26.211 | 38.388 | 1.00 | 47.00 | H0    |    |
| ANISOU 8471 HG3 ARG C 137  | 6330    | 5180   | 6350   | -260 | 1070  | -1020 | H0 |
| ATOM 8472 HD2 ARG C 137    | -40.636 | 28.232 | 37.185 | 1.00 | 49.29 | H0    |    |
| ANISOU 8472 HD2 ARG C 137  | 6830    | 5170   | 6730   | -350 | 1050  | -950  | H0 |
| ATOM 8473 HD3 ARG C 137    | -42.174 | 28.538 | 36.958 | 1.00 | 49.88 | H0    |    |
| ANISOU 8473 HD3 ARG C 137  | 6900    | 5190   | 6860   | -140 | 1070  | -930  | H0 |
| ATOM 8474 HE ARG C 137     | -40.864 | 28.793 | 39.303 | 1.00 | 50.84 | H0    |    |
| ANISOU 8474 HE ARG C 137   | 7100    | 5310   | 6910   | -320 | 1110  | -1170 | H0 |
| ATOM 8475 HH11 ARG C 137   | -43.984 | 28.454 | 38.165 | 1.00 | 51.57 | H0    |    |
| ANISOU 8475 HH11 ARG C 137 | 7050    | 5460   | 7080   | 90   | 1130  | -1050 | H0 |

|        |      |      |     |   |     |         |        |        |      |       |       |    |
|--------|------|------|-----|---|-----|---------|--------|--------|------|-------|-------|----|
| ATOM   | 8476 | HH12 | ARG | C | 137 | -44.652 | 29.014 | 39.411 | 1.00 | 52.81 | H0    |    |
| ANISOU | 8476 | HH12 | ARG | C | 137 | 7240    | 5580   | 7240   | 190  | 1180  | -1200 | H0 |
| ATOM   | 8477 | HH21 | ARG | C | 137 | -41.885 | 29.615 | 41.129 | 1.00 | 52.73 | H0    |    |
| ANISOU | 8477 | HH21 | ARG | C | 137 | 7420    | 5470   | 7150   | -190 | 1180  | -1380 | H0 |
| ATOM   | 8478 | HH22 | ARG | C | 137 | -43.408 | 29.706 | 41.177 | 1.00 | 53.30 | H0    |    |
| ANISOU | 8478 | HH22 | ARG | C | 137 | 7450    | 5550   | 7250   | 20   | 1210  | -1400 | H0 |
| ATOM   | 8479 | N    | ILE | C | 138 | -41.869 | 23.491 | 33.950 | 1.00 | 42.41 | N0    |    |
| ANISOU | 8479 | N    | ILE | C | 138 | 5480    | 4900   | 5740   | -220 | 950   | -600  | N0 |
| ATOM   | 8480 | CA   | ILE | C | 138 | -41.454 | 22.806 | 32.692 | 1.00 | 41.54 | C0    |    |
| ANISOU | 8480 | CA   | ILE | C | 138 | 5310    | 4880   | 5600   | -260 | 910   | -510  | C0 |
| ATOM   | 8481 | C    | ILE | C | 138 | -41.620 | 23.812 | 31.552 | 1.00 | 42.16 | C0    |    |
| ANISOU | 8481 | C    | ILE | C | 138 | 5450    | 4850   | 5720   | -240 | 910   | -410  | C0 |
| ATOM   | 8482 | O    | ILE | C | 138 | -42.743 | 24.329 | 31.394 | 1.00 | 42.89 | O0    |    |
| ANISOU | 8482 | O    | ILE | C | 138 | 5570    | 4870   | 5860   | -130 | 920   | -380  | O0 |
| ATOM   | 8483 | CB   | ILE | C | 138 | -42.284 | 21.523 | 32.468 | 1.00 | 40.96 | C0    |    |
| ANISOU | 8483 | CB   | ILE | C | 138 | 5140    | 4940   | 5480   | -190 | 880   | -480  | C0 |
| ATOM   | 8484 | CG1  | ILE | C | 138 | -42.001 | 20.470 | 33.543 | 1.00 | 40.37 | C0    |    |
| ANISOU | 8484 | CG1  | ILE | C | 138 | 5030    | 4960   | 5350   | -230 | 870   | -560  | C0 |
| ATOM   | 8485 | CG2  | ILE | C | 138 | -42.066 | 20.960 | 31.070 | 1.00 | 40.36 | C0    |    |
| ANISOU | 8485 | CG2  | ILE | C | 138 | 5030    | 4930   | 5380   | -210 | 850   | -380  | C0 |
| ATOM   | 8486 | CD1  | ILE | C | 138 | -42.927 | 19.272 | 33.493 | 1.00 | 40.21 | C0    |    |
| ANISOU | 8486 | CD1  | ILE | C | 138 | 4940    | 5050   | 5290   | -180 | 840   | -530  | C0 |
| ATOM   | 8487 | H    | ILE | C | 138 | -42.734 | 23.776 | 33.923 | 1.00 | 42.82 | H0    |    |
| ANISOU | 8487 | H    | ILE | C | 138 | 5530    | 4920   | 5820   | -130 | 960   | -590  | H0 |
| ATOM   | 8488 | HA   | ILE | C | 138 | -40.516 | 22.561 | 32.763 | 1.00 | 41.33 | H0    |    |
| ANISOU | 8488 | HA   | ILE | C | 138 | 5270    | 4890   | 5540   | -340 | 900   | -530  | H0 |
| ATOM   | 8489 | HB   | ILE | C | 138 | -43.238 | 21.772 | 32.543 | 1.00 | 41.24 | H0    |    |
| ANISOU | 8489 | HB   | ILE | C | 138 | 5180    | 4950   | 5540   | -110 | 900   | -470  | H0 |
| ATOM   | 8490 | HG12 | ILE | C | 138 | -41.076 | 20.158 | 33.440 | 1.00 | 40.15 | H0    |    |
| ANISOU | 8490 | HG12 | ILE | C | 138 | 4990    | 4960   | 5300   | -290 | 850   | -570  | H0 |
| ATOM   | 8491 | HG13 | ILE | C | 138 | -42.080 | 20.891 | 34.425 | 1.00 | 40.85 | H0    |    |
| ANISOU | 8491 | HG13 | ILE | C | 138 | 5120    | 4980   | 5420   | -220 | 900   | -620  | H0 |
| ATOM   | 8492 | HG21 | ILE | C | 138 | -42.455 | 21.560 | 30.410 | 1.00 | 40.93 | H0    |    |
| ANISOU | 8492 | HG21 | ILE | C | 138 | 5120    | 4940   | 5480   | -170 | 850   | -320  | H0 |
| ATOM   | 8493 | HG22 | ILE | C | 138 | -42.489 | 20.088 | 30.996 | 1.00 | 39.80 | H0    |    |
| ANISOU | 8493 | HG22 | ILE | C | 138 | 4900    | 4940   | 5280   | -180 | 830   | -370  | H0 |
| ATOM   | 8494 | HG23 | ILE | C | 138 | -41.112 | 20.870 | 30.900 | 1.00 | 40.28 | H0    |    |
| ANISOU | 8494 | HG23 | ILE | C | 138 | 5020    | 4940   | 5350   | -280 | 840   | -400  | H0 |
| ATOM   | 8495 | HD11 | ILE | C | 138 | -43.833 | 19.568 | 33.300 | 1.00 | 40.39 | H0    |    |
| ANISOU | 8495 | HD11 | ILE | C | 138 | 4950    | 5060   | 5330   | -120 | 860   | -500  | H0 |
| ATOM   | 8496 | HD12 | ILE | C | 138 | -42.913 | 18.814 | 34.352 | 1.00 | 39.84 | H0    |    |
| ANISOU | 8496 | HD12 | ILE | C | 138 | 4890    | 5040   | 5210   | -200 | 840   | -580  | H0 |
| ATOM   | 8497 | HD13 | ILE | C | 138 | -42.632 | 18.660 | 32.797 | 1.00 | 39.56 | H0    |    |
| ANISOU | 8497 | HD13 | ILE | C | 138 | 4830    | 5020   | 5180   | -200 | 810   | -490  | H0 |
| ATOM   | 8498 | N    | LYS | C | 139 | -40.539 | 24.096 | 30.820 | 1.00 | 42.09 | N0    |    |
| ANISOU | 8498 | N    | LYS | C | 139 | 5470    | 4830   | 5690   | -360 | 900   | -370  | N0 |
| ATOM   | 8499 | CA   | LYS | C | 139 | -40.528 | 25.029 | 29.662 | 1.00 | 43.24 | C0    |    |
| ANISOU | 8499 | CA   | LYS | C | 139 | 5690    | 4870   | 5860   | -380 | 890   | -270  | C0 |
| ATOM   | 8500 | C    | LYS | C | 139 | -40.494 | 24.211 | 28.367 | 1.00 | 42.07 | C0    |    |
| ANISOU | 8500 | C    | LYS | C | 139 | 5470    | 4850   | 5660   | -390 | 870   | -180  | C0 |
| ATOM   | 8501 | O    | LYS | C | 139 | -39.640 | 23.322 | 28.256 | 1.00 | 40.74 | O0    |    |
| ANISOU | 8501 | O    | LYS | C | 139 | 5220    | 4820   | 5430   | -460 | 860   | -210  | O0 |
| ATOM   | 8502 | CB   | LYS | C | 139 | -39.338 | 25.989 | 29.745 | 1.00 | 44.99 | C0    |    |
| ANISOU | 8502 | CB   | LYS | C | 139 | 6010    | 5000   | 6080   | -530 | 910   | -280  | C0 |



|                           |         |        |        |      |       |      |    |
|---------------------------|---------|--------|--------|------|-------|------|----|
| ATOM 8503 CG LYS C 139    | -39.530 | 27.162 | 30.696 | 1.00 | 46.98 | C0   |    |
| ANISOU 8503 CG LYS C 139  | 6390    | 5070   | 6390   | -520 | 930   | -350 | C0 |
| ATOM 8504 CD LYS C 139    | -38.506 | 28.274 | 30.528 | 1.00 | 48.68 | C0   |    |
| ANISOU 8504 CD LYS C 139  | 6730    | 5160   | 6610   | -690 | 930   | -330 | C0 |
| ATOM 8505 CE LYS C 139    | -38.745 | 29.433 | 31.474 | 1.00 | 50.23 | C0   |    |
| ANISOU 8505 CE LYS C 139  | 7070    | 5150   | 6870   | -660 | 940   | -410 | C0 |
| ATOM 8506 NZ LYS C 139    | -37.750 | 30.515 | 31.281 | 1.00 | 52.22 | N0   |    |
| ANISOU 8506 NZ LYS C 139  | 7460    | 5270   | 7110   | -850 | 930   | -390 | N0 |
| ATOM 8507 H LYS C 139     | -39.725 | 23.723 | 30.990 | 1.00 | 41.84 | H0   |    |
| ANISOU 8507 H LYS C 139   | 5410    | 4860   | 5630   | -430 | 900   | -410 | H0 |
| ATOM 8508 HA LYS C 139    | -41.358 | 25.556 | 29.680 | 1.00 | 43.84 | H0   |    |
| ANISOU 8508 HA LYS C 139  | 5820    | 4860   | 5980   | -290 | 890   | -250 | H0 |
| ATOM 8509 HB2 LYS C 139   | -38.548 | 25.483 | 30.028 | 1.00 | 44.48 | H0   |    |
| ANISOU 8509 HB2 LYS C 139 | 5890    | 5040   | 5980   | -610 | 910   | -330 | H0 |
| ATOM 8510 HB3 LYS C 139   | -39.160 | 26.342 | 28.848 | 1.00 | 45.51 | H0   |    |
| ANISOU 8510 HB3 LYS C 139 | 6110    | 5050   | 6140   | -580 | 900   | -200 | H0 |
| ATOM 8511 HG2 LYS C 139   | -40.427 | 27.534 | 30.558 | 1.00 | 47.32 | H0   |    |
| ANISOU 8511 HG2 LYS C 139 | 6470    | 5030   | 6480   | -410 | 920   | -320 | H0 |
| ATOM 8512 HG3 LYS C 139   | -39.485 | 26.828 | 31.618 | 1.00 | 46.43 | H0   |    |
| ANISOU 8512 HG3 LYS C 139 | 6280    | 5040   | 6320   | -510 | 940   | -440 | H0 |
| ATOM 8513 HD2 LYS C 139   | -37.609 | 27.912 | 30.688 | 1.00 | 48.29 | H0   |    |
| ANISOU 8513 HD2 LYS C 139 | 6620    | 5210   | 6520   | -790 | 940   | -370 | H0 |
| ATOM 8514 HD3 LYS C 139   | -38.540 | 28.605 | 29.605 | 1.00 | 49.17 | H0   |    |
| ANISOU 8514 HD3 LYS C 139 | 6830    | 5190   | 6670   | -710 | 910   | -240 | H0 |
| ATOM 8515 HE2 LYS C 139   | -39.639 | 29.795 | 31.328 | 1.00 | 50.77 | H0   |    |
| ANISOU 8515 HE2 LYS C 139 | 7190    | 5120   | 6980   | -540 | 930   | -380 | H0 |
| ATOM 8516 HE3 LYS C 139   | -38.694 | 29.117 | 32.396 | 1.00 | 49.84 | H0   |    |
| ANISOU 8516 HE3 LYS C 139 | 6980    | 5140   | 6810   | -650 | 960   | -500 | H0 |
| ATOM 8517 HZ1 LYS C 139   | -36.915 | 30.196 | 31.431 | 1.00 | 51.73 | H0   |    |
| ANISOU 8517 HZ1 LYS C 139 | 7340    | 5310   | 7000   | -960 | 940   | -420 | H0 |
| ATOM 8518 HZ2 LYS C 139   | -37.917 | 31.193 | 31.860 | 1.00 | 52.95 | H0   |    |
| ANISOU 8518 HZ2 LYS C 139 | 7650    | 5230   | 7240   | -830 | 940   | -440 | H0 |
| ATOM 8519 HZ3 LYS C 139   | -37.800 | 30.831 | 30.432 | 1.00 | 52.60 | H0   |    |
| ANISOU 8519 HZ3 LYS C 139 | 7550    | 5270   | 7160   | -870 | 920   | -300 | H0 |
| ATOM 8520 N ILE C 140     | -41.412 | 24.496 | 27.440 | 1.00 | 41.82 | N0   |    |
| ANISOU 8520 N ILE C 140   | 5460    | 4780   | 5650   | -310 | 850   | -70  | N0 |
| ATOM 8521 CA ILE C 140    | -41.472 | 23.861 | 26.094 | 1.00 | 41.09 | C0   |    |
| ANISOU 8521 CA ILE C 140  | 5310    | 4800   | 5500   | -320 | 820   | 20   | C0 |
| ATOM 8522 C ILE C 140     | -41.535 | 24.964 | 25.033 | 1.00 | 41.71 | C0   |    |
| ANISOU 8522 C ILE C 140   | 5490    | 4760   | 5590   | -350 | 800   | 150  | C0 |
| ATOM 8523 O ILE C 140     | -42.317 | 25.918 | 25.198 | 1.00 | 42.49 | O0   |    |
| ANISOU 8523 O ILE C 140   | 5680    | 4710   | 5760   | -260 | 790   | 180  | O0 |
| ATOM 8524 CB ILE C 140    | -42.654 | 22.880 | 25.999 | 1.00 | 40.99 | C0   |    |
| ANISOU 8524 CB ILE C 140  | 5210    | 4880   | 5480   | -190 | 790   | 40   | C0 |
| ATOM 8525 CG1 ILE C 140   | -42.466 | 21.707 | 26.962 | 1.00 | 40.55 | C0   |    |
| ANISOU 8525 CG1 ILE C 140 | 5070    | 4940   | 5400   | -200 | 800   | -70  | C0 |
| ATOM 8526 CG2 ILE C 140   | -42.852 | 22.397 | 24.567 | 1.00 | 40.90 | C0   |    |
| ANISOU 8526 CG2 ILE C 140 | 5160    | 4960   | 5420   | -200 | 760   | 140  | C0 |
| ATOM 8527 CD1 ILE C 140   | -43.750 | 21.017 | 27.338 | 1.00 | 40.71 | C0   |    |
| ANISOU 8527 CD1 ILE C 140 | 5030    | 5010   | 5420   | -90  | 780   | -80  | C0 |
| ATOM 8528 H ILE C 140     | -42.072 | 25.108 | 27.579 | 1.00 | 42.55 | H0   |    |
| ANISOU 8528 H ILE C 140   | 5600    | 4780   | 5790   | -240 | 850   | -60  | H0 |
| ATOM 8529 HA ILE C 140    | -40.653 | 23.357 | 25.961 | 1.00 | 40.69 | H0   |    |
| ANISOU 8529 HA ILE C 140  | 5220    | 4840   | 5410   | -400 | 820   | 0    | H0 |

|                            |         |        |        |       |       |      |
|----------------------------|---------|--------|--------|-------|-------|------|
| ATOM 8530 HB ILE C 140     | -43.471 | 23.366 | 26.272 | 1.00  | 41.50 | H0   |
| ANISOU 8530 HB ILE C 140   | 5300    | 4870   | 5600   | -110  | 790   | 50   |
| ATOM 8531 HG12 ILE C 140   | -41.866 | 21.052 | 26.546 | 1.00  | 40.01 | H0   |
| ANISOU 8531 HG12 ILE C 140 | 4960    | 4960   | 5280   | -250  | 790   | -70  |
| ATOM 8532 HG13 ILE C 140   | -42.035 | 22.032 | 27.779 | 1.00  | 40.63 | H0   |
| ANISOU 8532 HG13 ILE C 140 | 5110    | 4900   | 5430   | -230  | 820   | -130 |
| ATOM 8533 HG21 ILE C 140   | -43.331 | 23.073 | 24.057 | 1.00  | 41.70 | H0   |
| ANISOU 8533 HG21 ILE C 140 | 5310    | 4990   | 5540   | -160  | 750   | 210  |
| ATOM 8534 HG22 ILE C 140   | -43.367 | 21.572 | 24.569 | 1.00  | 40.23 | H0   |
| ANISOU 8534 HG22 ILE C 140 | 5010    | 4960   | 5310   | -150  | 740   | 130  |
| ATOM 8535 HG23 ILE C 140   | -41.986 | 22.235 | 24.154 | 1.00  | 40.81 | H0   |
| ANISOU 8535 HG23 ILE C 140 | 5140    | 5000   | 5360   | -290  | 770   | 140  |
| ATOM 8536 HD11 ILE C 140   | -44.340 | 21.648 | 27.785 | 1.00  | 41.10 | H0   |
| ANISOU 8536 HD11 ILE C 140 | 5100    | 4990   | 5520   | -30   | 800   | -90  |
| ATOM 8537 HD12 ILE C 140   | -43.556 | 20.275 | 27.936 | 1.00  | 39.85 | H0   |
| ANISOU 8537 HD12 ILE C 140 | 4880    | 4970   | 5290   | -110  | 780   | -140 |
| ATOM 8538 HD13 ILE C 140   | -44.186 | 20.680 | 26.536 | 1.00  | 40.44 | H0   |
| ANISOU 8538 HD13 ILE C 140 | 4970    | 5030   | 5370   | -60   | 760   | -10  |
| ATOM 8539 N GLY C 141      | -40.712 | 24.825 | 23.994 | 1.00  | 41.18 | N0   |
| ANISOU 8539 N GLY C 141    | 5410    | 4780   | 5460   | -470  | 800   | 210  |
| ATOM 8540 CA GLY C 141     | -40.665 | 25.715 | 22.824 | 1.00  | 42.11 | C0   |
| ANISOU 8540 CA GLY C 141   | 5630    | 4820   | 5550   | -530  | 780   | 340  |
| ATOM 8541 C GLY C 141      | -39.913 | 25.046 | 21.694 | 1.00  | 41.58 | C0   |
| ANISOU 8541 C GLY C 141    | 5490    | 4930   | 5380   | -640  | 790   | 380  |
| ATOM 8542 O GLY C 141      | -39.356 | 23.957 | 21.926 | 1.00  | 40.48 | O0   |
| ANISOU 8542 O GLY C 141    | 5230    | 4950   | 5200   | -660  | 800   | 290  |
| ATOM 8543 H GLY C 141      | -40.108 | 24.144 | 23.954 | 1.00  | 40.59 | H0   |
| ANISOU 8543 H GLY C 141    | 5270    | 4820   | 5330   | -520  | 810   | 170  |
| ATOM 8544 HA2 GLY C 141    | -41.589 | 25.922 | 22.533 | 1.00  | 42.46 | H0   |
| ANISOU 8544 HA2 GLY C 141  | 5700    | 4810   | 5630   | -430  | 750   | 400  |
| ATOM 8545 HA3 GLY C 141    | -40.215 | 26.561 | 23.072 | 1.00  | 43.05 | H0   |
| ANISOU 8545 HA3 GLY C 141  | 5840    | 4830   | 5690   | -600  | 790   | 340  |
| ATOM 8546 N SER C 142      | -39.906 | 25.664 | 20.515 | 1.00  | 42.28 | N0   |
| ANISOU 8546 N SER C 142    | 5650    | 4990   | 5430   | -700  | 770   | 510  |
| ATOM 8547 CA SER C 142     | -39.188 | 25.170 | 19.315 | 1.00  | 42.34 | C0   |
| ANISOU 8547 CA SER C 142   | 5600    | 5170   | 5320   | -820  | 780   | 560  |
| ATOM 8548 C SER C 142      | -37.684 | 25.127 | 19.599 | 1.00  | 42.38 | C0   |
| ANISOU 8548 C SER C 142    | 5560    | 5280   | 5270   | -990  | 830   | 480  |
| ATOM 8549 O SER C 142      | -37.183 | 26.032 | 20.294 | 1.00  | 43.86 | O0   |
| ANISOU 8549 O SER C 142    | 5830    | 5340   | 5500   | -1080 | 850   | 460  |
| ATOM 8550 CB SER C 142     | -39.478 | 26.020 | 18.115 | 1.00  | 43.63 | C0   |
| ANISOU 8550 CB SER C 142   | 5870    | 5260   | 5440   | -880  | 740   | 720  |
| ATOM 8551 OG SER C 142     | -38.586 | 25.691 | 17.066 | 1.00  | 44.04 | O0   |
| ANISOU 8551 OG SER C 142   | 5870    | 5490   | 5370   | -1030 | 770   | 760  |
| ATOM 8552 H SER C 142      | -40.350 | 26.445 | 20.359 | 1.00  | 43.29 | H0   |
| ANISOU 8552 H SER C 142    | 5870    | 4990   | 5590   | -680  | 740   | 580  |
| ATOM 8553 HA SER C 142     | -39.499 | 24.244 | 19.130 | 1.00  | 41.35 | H0   |
| ANISOU 8553 HA SER C 142   | 5380    | 5160   | 5170   | -750  | 770   | 530  |
| ATOM 8554 HB2 SER C 142    | -40.405 | 25.871 | 17.821 | 1.00  | 43.56 | H0   |
| ANISOU 8554 HB2 SER C 142  | 5870    | 5230   | 5450   | -760  | 710   | 770  |
| ATOM 8555 HB3 SER C 142    | -39.376 | 26.969 | 18.350 | 1.00  | 44.70 | H0   |
| ANISOU 8555 HB3 SER C 142  | 6120    | 5250   | 5610   | -920  | 740   | 760  |
| ATOM 8556 N TRP C 143      | -36.983 | 24.135 | 19.050 | 1.00  | 41.49 | N0   |
| ANISOU 8556 N TRP C 143    | 5320    | 5380   | 5060   | -1040 | 850   | 430  |

|                           |         |        |        |       |       |      |    |
|---------------------------|---------|--------|--------|-------|-------|------|----|
| ATOM 8557 CA TRP C 143    | -35.511 | 24.008 | 19.203 | 1.00  | 41.67 | C0   |    |
| ANISOU 8557 CA TRP C 143  | 5260    | 5550   | 5020   | -1190 | 900   | 340  | C0 |
| ATOM 8558 C TRP C 143     | -34.788 | 24.880 | 18.167 | 1.00  | 42.92 | C0   |    |
| ANISOU 8558 C TRP C 143   | 5480    | 5740   | 5090   | -1390 | 930   | 450  | C0 |
| ATOM 8559 O TRP C 143     | -33.730 | 25.430 | 18.516 | 1.00  | 43.87 | O0   |    |
| ANISOU 8559 O TRP C 143   | 5600    | 5890   | 5190   | -1560 | 970   | 410  | O0 |
| ATOM 8560 CB TRP C 143    | -35.076 | 22.540 | 19.136 | 1.00  | 40.78 | C0   |    |
| ANISOU 8560 CB TRP C 143  | 4980    | 5660   | 4850   | -1130 | 910   | 230  | C0 |
| ATOM 8561 CG TRP C 143    | -33.655 | 22.343 | 19.565 | 1.00  | 41.61 | C0   |    |
| ANISOU 8561 CG TRP C 143  | 4990    | 5910   | 4910   | -1240 | 950   | 120  | C0 |
| ATOM 8562 CD1 TRP C 143   | -32.607 | 21.967 | 18.776 | 1.00  | 42.46 | C0   |    |
| ANISOU 8562 CD1 TRP C 143 | 4990    | 6240   | 4910   | -1340 | 980   | 80   | C0 |
| ATOM 8563 CD2 TRP C 143   | -33.108 | 22.559 | 20.879 | 1.00  | 41.58 | C0   |    |
| ANISOU 8563 CD2 TRP C 143 | 4970    | 5860   | 4970   | -1260 | 960   | 20   | C0 |
| ATOM 8564 NE1 TRP C 143   | -31.455 | 21.915 | 19.512 | 1.00  | 42.70 | N0   |    |
| ANISOU 8564 NE1 TRP C 143 | 4930    | 6370   | 4920   | -1410 | 1010  | -30  | N0 |
| ATOM 8565 CE2 TRP C 143   | -31.730 | 22.271 | 20.805 | 1.00  | 42.40 | C0   |    |
| ANISOU 8565 CE2 TRP C 143 | 4950    | 6170   | 4990   | -1370 | 990   | -70  | C0 |
| ATOM 8566 CE3 TRP C 143   | -33.645 | 22.956 | 22.108 | 1.00  | 41.31 | C0   |    |
| ANISOU 8566 CE3 TRP C 143 | 5020    | 5640   | 5040   | -1190 | 940   | -10  | C0 |
| ATOM 8567 CZ2 TRP C 143   | -30.888 | 22.368 | 21.913 | 1.00  | 42.73 | C0   |    |
| ANISOU 8567 CZ2 TRP C 143 | 4950    | 6230   | 5060   | -1420 | 1000  | -180 | C0 |
| ATOM 8568 CZ3 TRP C 143   | -32.815 | 23.044 | 23.203 | 1.00  | 41.39 | C0   |    |
| ANISOU 8568 CZ3 TRP C 143 | 4990    | 5670   | 5070   | -1250 | 950   | -120 | C0 |
| ATOM 8569 CH2 TRP C 143   | -31.455 | 22.760 | 23.104 | 1.00  | 42.12 | C0   |    |
| ANISOU 8569 CH2 TRP C 143 | 4960    | 5960   | 5080   | -1360 | 980   | -190 | C0 |
| ATOM 8570 H TRP C 143     | -37.359 | 23.474 | 18.549 | 1.00  | 41.04 | H0   |    |
| ANISOU 8570 H TRP C 143   | 5210    | 5410   | 4980   | -980  | 840   | 440  | H0 |
| ATOM 8571 HA TRP C 143    | -35.278 | 24.341 | 20.101 | 1.00  | 41.62 | H0   |    |
| ANISOU 8571 HA TRP C 143  | 5280    | 5470   | 5070   | -1210 | 910   | 290  | H0 |
| ATOM 8572 HB2 TRP C 143   | -35.666 | 22.012 | 19.712 | 1.00  | 39.86 | H0   |    |
| ANISOU 8572 HB2 TRP C 143 | 4850    | 5500   | 4790   | -1010 | 880   | 190  | H0 |
| ATOM 8573 HB3 TRP C 143   | -35.186 | 22.223 | 18.216 | 1.00  | 41.01 | H0   |    |
| ANISOU 8573 HB3 TRP C 143 | 4990    | 5780   | 4820   | -1130 | 910   | 280  | H0 |
| ATOM 8574 HD1 TRP C 143   | -32.664 | 21.760 | 17.856 | 1.00  | 42.76 | H0   |    |
| ANISOU 8574 HD1 TRP C 143 | 5010    | 6360   | 4880   | -1350 | 990   | 130  | H0 |
| ATOM 8575 HE1 TRP C 143   | -30.672 | 21.687 | 19.202 | 1.00  | 43.34 | H0   |    |
| ANISOU 8575 HE1 TRP C 143 | 4920    | 6610   | 4940   | -1470 | 1040  | -80  | H0 |
| ATOM 8576 HE3 TRP C 143   | -34.566 | 23.151 | 22.186 | 1.00  | 40.99 | H0   |    |
| ANISOU 8576 HE3 TRP C 143 | 5050    | 5480   | 5050   | -1110 | 920   | 40   | H0 |
| ATOM 8577 HZ2 TRP C 143   | -29.970 | 22.172 | 21.848 | 1.00  | 43.13 | H0   |    |
| ANISOU 8577 HZ2 TRP C 143 | 4900    | 6430   | 5050   | -1490 | 1020  | -240 | H0 |
| ATOM 8578 HZ3 TRP C 143   | -33.172 | 23.313 | 24.035 | 1.00  | 41.14 | H0   |    |
| ANISOU 8578 HZ3 TRP C 143 | 5010    | 5520   | 5100   | -1210 | 940   | -140 | H0 |
| ATOM 8579 HH2 TRP C 143   | -30.914 | 22.832 | 23.868 | 1.00  | 42.15 | H0   |    |
| ANISOU 8579 HH2 TRP C 143 | 4940    | 5980   | 5100   | -1390 | 980   | -270 | H0 |
| ATOM 8580 N THR C 144     | -35.329 | 25.019 | 16.951 | 1.00  | 43.12 | N0   |    |
| ANISOU 8580 N THR C 144   | 5550    | 5780   | 5060   | -1400 | 910   | 580  | N0 |
| ATOM 8581 CA THR C 144    | -34.608 | 25.622 | 15.793 | 1.00  | 44.83 | C0   |    |
| ANISOU 8581 CA THR C 144  | 5800    | 6080   | 5150   | -1610 | 930   | 680  | C0 |
| ATOM 8582 C THR C 144     | -35.418 | 26.722 | 15.089 | 1.00  | 46.22 | C0   |    |
| ANISOU 8582 C THR C 144   | 6170    | 6060   | 5330   | -1630 | 880   | 860  | C0 |
| ATOM 8583 O THR C 144     | -34.901 | 27.248 | 14.083 | 1.00  | 47.77 | O0   |    |
| ANISOU 8583 O THR C 144   | 6420    | 6320   | 5420   | -1820 | 900   | 970  | O0 |

|                            |         |        |        |       |       |      |    |
|----------------------------|---------|--------|--------|-------|-------|------|----|
| ATOM 8584 CB THR C 144     | -34.241 | 24.539 | 14.773 | 1.00  | 44.26 | C0   |    |
| ANISOU 8584 CB THR C 144   | 5590    | 6280   | 4950   | -1610 | 960   | 650  | C0 |
| ATOM 8585 OG1 THR C 144    | -35.449 | 24.134 | 14.128 | 1.00  | 43.36 | O0   |    |
| ANISOU 8585 OG1 THR C 144  | 5500    | 6130   | 4840   | -1470 | 900   | 720  | O0 |
| ATOM 8586 CG2 THR C 144    | -33.555 | 23.350 | 15.409 | 1.00  | 42.92 | C0   |    |
| ANISOU 8586 CG2 THR C 144  | 5240    | 6290   | 4780   | -1540 | 990   | 460  | C0 |
| ATOM 8587 H THR C 144      | -36.163 | 24.726 | 16.734 | 1.00  | 42.72 | H0   |    |
| ANISOU 8587 H THR C 144    | 5510    | 5690   | 5030   | -1290 | 870   | 610  | H0 |
| ATOM 8588 HA THR C 144     | -33.777 | 26.019 | 16.129 | 1.00  | 45.43 | H0   |    |
| ANISOU 8588 HA THR C 144   | 5870    | 6180   | 5210   | -1730 | 970   | 640  | H0 |
| ATOM 8589 HB THR C 144     | -33.636 | 24.935 | 14.101 | 1.00  | 45.44 | H0   |    |
| ANISOU 8589 HB THR C 144   | 5740    | 6510   | 5010   | -1770 | 990   | 700  | H0 |
| ATOM 8590 HG21 THR C 144   | -32.904 | 23.661 | 16.063 | 1.00  | 43.18 | H0   |    |
| ANISOU 8590 HG21 THR C 144 | 5260    | 6320   | 4830   | -1610 | 1010  | 410  | H0 |
| ATOM 8591 HG22 THR C 144   | -33.100 | 22.831 | 14.721 | 1.00  | 43.22 | H0   |    |
| ANISOU 8591 HG22 THR C 144 | 5190    | 6510   | 4720   | -1580 | 1010  | 440  | H0 |
| ATOM 8592 HG23 THR C 144   | -34.217 | 22.790 | 15.852 | 1.00  | 41.79 | H0   |    |
| ANISOU 8592 HG23 THR C 144 | 5080    | 6100   | 4700   | -1390 | 960   | 420  | H0 |
| ATOM 8593 N HIS C 145      | -36.631 | 27.041 | 15.553 | 1.00  | 45.85 | N0   |    |
| ANISOU 8593 N HIS C 145    | 6220    | 5800   | 5400   | -1460 | 820   | 900  | N0 |
| ATOM 8594 CA HIS C 145     | -37.506 | 28.073 | 14.935 | 1.00  | 47.78 | C0   |    |
| ANISOU 8594 CA HIS C 145   | 6650    | 5840   | 5670   | -1440 | 760   | 1080 | C0 |
| ATOM 8595 C HIS C 145      | -37.748 | 29.216 | 15.928 | 1.00  | 48.72 | C0   |    |
| ANISOU 8595 C HIS C 145    | 6920    | 5680   | 5910   | -1420 | 730   | 1080 | C0 |
| ATOM 8596 O HIS C 145      | -38.259 | 28.952 | 17.026 | 1.00  | 47.91 | O0   |    |
| ANISOU 8596 O HIS C 145    | 6780    | 5500   | 5920   | -1260 | 730   | 970  | O0 |
| ATOM 8597 CB HIS C 145     | -38.828 | 27.469 | 14.443 | 1.00  | 47.10 | C0   |    |
| ANISOU 8597 CB HIS C 145   | 6520    | 5770   | 5600   | -1240 | 700   | 1130 | C0 |
| ATOM 8598 CG HIS C 145     | -38.687 | 26.425 | 13.386 | 1.00  | 46.90 | C0   |    |
| ANISOU 8598 CG HIS C 145   | 6370    | 5990   | 5450   | -1260 | 710   | 1130 | C0 |
| ATOM 8599 ND1 HIS C 145    | -38.265 | 26.721 | 12.103 | 1.00  | 48.12 | N0   |    |
| ANISOU 8599 ND1 HIS C 145  | 6570    | 6240   | 5470   | -1420 | 710   | 1250 | N0 |
| ATOM 8600 CD2 HIS C 145    | -38.948 | 25.099 | 13.402 | 1.00  | 45.42 | C0   |    |
| ANISOU 8600 CD2 HIS C 145  | 6030    | 5970   | 5250   | -1150 | 720   | 1030 | C0 |
| ATOM 8601 CE1 HIS C 145    | -38.258 | 25.620 | 11.382 | 1.00  | 47.59 | C0   |    |
| ANISOU 8601 CE1 HIS C 145  | 6370    | 6400   | 5310   | -1400 | 730   | 1210 | C0 |
| ATOM 8602 NE2 HIS C 145    | -38.672 | 24.610 | 12.154 | 1.00  | 45.96 | N0   |    |
| ANISOU 8602 NE2 HIS C 145  | 6050    | 6230   | 5180   | -1230 | 730   | 1080 | N0 |
| ATOM 8603 H HIS C 145      | -37.009 | 26.659 | 16.286 | 1.00  | 44.92 | H0   |    |
| ANISOU 8603 H HIS C 145    | 6060    | 5650   | 5360   | -1340 | 820   | 830  | H0 |
| ATOM 8604 HA HIS C 145     | -37.032 | 28.444 | 14.155 | 1.00  | 48.90 | H0   |    |
| ANISOU 8604 HA HIS C 145   | 6830    | 6020   | 5720   | -1590 | 770   | 1160 | H0 |
| ATOM 8605 HB2 HIS C 145    | -39.300 | 27.078 | 15.210 | 1.00  | 46.07 | H0   |    |
| ANISOU 8605 HB2 HIS C 145  | 6340    | 5610   | 5560   | -1100 | 690   | 1050 | H0 |
| ATOM 8606 HB3 HIS C 145    | -39.391 | 28.194 | 14.092 | 1.00  | 48.21 | H0   |    |
| ANISOU 8606 HB3 HIS C 145  | 6780    | 5770   | 5760   | -1210 | 650   | 1240 | H0 |
| ATOM 8607 HD2 HIS C 145    | -39.260 | 24.602 | 14.132 | 1.00  | 44.30 | H0   |    |
| ANISOU 8607 HD2 HIS C 145  | 5830    | 5820   | 5180   | -1040 | 720   | 950  | H0 |
| ATOM 8608 HE1 HIS C 145    | -37.999 | 25.555 | 10.479 | 1.00  | 48.35 | H0   |    |
| ANISOU 8608 HE1 HIS C 145  | 6470    | 6610   | 5300   | -1490 | 730   | 1270 | H0 |
| ATOM 8609 N HIS C 146      | -37.405 | 30.440 | 15.529 | 1.00  | 51.40 | N0   |    |
| ANISOU 8609 N HIS C 146    | 7450    | 5860   | 6220   | -1580 | 710   | 1200 | N0 |
| ATOM 8610 CA HIS C 146     | -37.669 | 31.699 | 16.279 | 1.00  | 53.12 | C0   |    |
| ANISOU 8610 CA HIS C 146   | 7870    | 5770   | 6550   | -1560 | 670   | 1220 | C0 |

|                           |         |        |        |       |          |    |
|---------------------------|---------|--------|--------|-------|----------|----|
| ATOM 8611 C HIS C 146     | -39.142 | 32.107 | 16.107 | 1.00  | 53.53    | C0 |
| ANISOU 8611 C HIS C 146   | 8030    | 5620   | 6690   | -1330 | 580 1320 | C0 |
| ATOM 8612 O HIS C 146     | -39.872 | 31.421 | 15.357 | 1.00  | 52.53    | O0 |
| ANISOU 8612 O HIS C 146   | 7810    | 5620   | 6530   | -1210 | 550 1370 | O0 |
| ATOM 8613 CB HIS C 146    | -36.678 | 32.794 | 15.847 | 1.00  | 55.65    | C0 |
| ANISOU 8613 CB HIS C 146  | 8350    | 6000   | 6790   | -1850 | 680 1320 | C0 |
| ATOM 8614 CG HIS C 146    | -36.631 | 33.047 | 14.377 | 1.00  | 57.26    | C0 |
| ANISOU 8614 CG HIS C 146  | 8630    | 6260   | 6860   | -1980 | 650 1500 | C0 |
| ATOM 8615 ND1 HIS C 146   | -37.668 | 33.647 | 13.692 | 1.00  | 58.59    | N0 |
| ANISOU 8615 ND1 HIS C 146 | 8960    | 6250   | 7050   | -1870 | 550 1660 | N0 |
| ATOM 8616 CD2 HIS C 146   | -35.663 | 32.815 | 13.466 | 1.00  | 58.47    | C0 |
| ANISOU 8616 CD2 HIS C 146 | 8720    | 6640   | 6860   | -2220 | 700 1550 | C0 |
| ATOM 8617 CE1 HIS C 146   | -37.348 | 33.753 | 12.417 | 1.00  | 60.12    | C0 |
| ANISOU 8617 CE1 HIS C 146 | 9190    | 6550   | 7100   | -2040 | 540 1810 | C0 |
| ATOM 8618 NE2 HIS C 146   | -36.121 | 33.258 | 12.253 | 1.00  | 60.06    | N0 |
| ANISOU 8618 NE2 HIS C 146 | 9050    | 6800   | 6980   | -2260 | 630 1740 | N0 |
| ATOM 8619 H HIS C 146     | -36.972 | 30.592 | 14.744 | 1.00  | 52.23    | H0 |
| ANISOU 8619 H HIS C 146   | 7570    | 6040   | 6240   | -1710 | 720 1270 | H0 |
| ATOM 8620 HA HIS C 146    | -37.519 | 31.513 | 17.235 | 1.00  | 52.24    | H0 |
| ANISOU 8620 HA HIS C 146  | 7710    | 5640   | 6500   | -1520 | 700 1110 | H0 |
| ATOM 8621 HB2 HIS C 146   | -36.914 | 33.632 | 16.302 | 1.00  | 56.60    | H0 |
| ANISOU 8621 HB2 HIS C 146 | 8630    | 5900   | 6980   | -1830 | 640 1340 | H0 |
| ATOM 8622 HB3 HIS C 146   | -35.779 | 32.539 | 16.148 | 1.00  | 55.31    | H0 |
| ANISOU 8622 HB3 HIS C 146 | 8230    | 6090   | 6700   | -1980 | 730 1240 | H0 |
| ATOM 8623 HD2 HIS C 146   | -34.827 | 32.420 | 13.629 | 1.00  | 57.94    | H0 |
| ANISOU 8623 HD2 HIS C 146 | 8530    | 6750   | 6740   | -2330 | 760 1460 | H0 |
| ATOM 8624 HE1 HIS C 146   | -37.890 | 34.123 | 11.741 | 1.00  | 61.11    | H0 |
| ANISOU 8624 HE1 HIS C 146 | 9430    | 6590   | 7200   | -2010 | 470 1940 | H0 |
| ATOM 8625 N SER C 147     | -39.547 | 33.194 | 16.771 | 1.00  | 54.72    | N0 |
| ANISOU 8625 N SER C 147   | 8370    | 5480   | 6940   | -1260 | 530 1330 | N0 |
| ATOM 8626 CA SER C 147    | -40.950 | 33.665 | 16.925 | 1.00  | 55.56    | C0 |
| ANISOU 8626 CA SER C 147  | 8570    | 5380   | 7160   | -1000 | 450 1370 | C0 |
| ATOM 8627 C SER C 147     | -41.610 | 33.966 | 15.573 | 1.00  | 56.94    | C0 |
| ANISOU 8627 C SER C 147   | 8830    | 5530   | 7280   | -960  | 360 1570 | C0 |
| ATOM 8628 O SER C 147     | -42.856 | 33.918 | 15.519 | 1.00  | 57.09    | O0 |
| ANISOU 8628 O SER C 147   | 8840    | 5490   | 7370   | -720  | 300 1600 | O0 |
| ATOM 8629 CB SER C 147    | -40.998 | 34.875 | 17.821 | 1.00  | 57.05    | C0 |
| ANISOU 8629 CB SER C 147  | 8960    | 5260   | 7450   | -970  | 420 1340 | C0 |
| ATOM 8630 OG SER C 147    | -40.130 | 35.891 | 17.340 | 1.00  | 59.28    | O0 |
| ANISOU 8630 OG SER C 147  | 9450    | 5400   | 7670   | -1220 | 400 1450 | O0 |
| ATOM 8631 H SER C 147     | -38.961 | 33.743 | 17.202 | 1.00  | 55.51    | H0 |
| ANISOU 8631 H SER C 147   | 8550    | 5490   | 7050   | -1370 | 550 1300 | H0 |
| ATOM 8632 HA SER C 147    | -41.466 | 32.937 | 17.362 | 1.00  | 54.07    | H0 |
| ANISOU 8632 HA SER C 147  | 8240    | 5290   | 7010   | -850  | 470 1290 | H0 |
| ATOM 8633 HB2 SER C 147   | -41.919 | 35.219 | 17.858 | 1.00  | 57.70    | H0 |
| ANISOU 8633 HB2 SER C 147 | 9110    | 5210   | 7600   | -790  | 360 1370 | H0 |
| ATOM 8634 HB3 SER C 147   | -40.729 | 34.619 | 18.732 | 1.00  | 56.17    | H0 |
| ANISOU 8634 HB3 SER C 147 | 8780    | 5180   | 7380   | -960  | 470 1210 | H0 |
| ATOM 8635 N ARG C 148     | -40.826 | 34.274 | 14.532 | 1.00  | 58.27    | N0 |
| ANISOU 8635 N ARG C 148   | 9080    | 5740   | 7320   | -1210 | 360 1700 | N0 |
| ATOM 8636 CA AARG C 148   | -41.327 | 34.679 | 13.187 | 0.50  | 60.12    | C0 |
| ANISOU 8636 CA AARG C 148 | 9430    | 5940   | 7470   | -1220 | 270 1900 | C0 |
| ATOM 8637 CA BARG C 148   | -41.373 | 34.678 | 13.207 | 0.50  | 60.00    | C0 |
| ANISOU 8637 CA BARG C 148 | 9420    | 5920   | 7460   | -1200 | 270 1900 | C0 |

|                           |         |        |        |       |       |      |    |
|---------------------------|---------|--------|--------|-------|-------|------|----|
| ATOM 8638 C ARG C 148     | -41.629 | 33.434 | 12.343 | 1.00  | 58.55 |      | C0 |
| ANISOU 8638 C ARG C 148   | 9020    | 6040   | 7180   | -1170 | 290   | 1920 | C0 |
| ATOM 8639 O ARG C 148     | -42.191 | 33.600 | 11.243 | 1.00  | 59.17 |      | O0 |
| ANISOU 8639 O ARG C 148   | 9170    | 6120   | 7200   | -1150 | 210   | 2080 | O0 |
| ATOM 8640 CB AARG C 148   | -40.310 | 35.574 | 12.467 | 0.50  | 62.57 |      | C0 |
| ANISOU 8640 CB AARG C 148 | 9940    | 6170   | 7670   | -1530 | 260   | 2040 | C0 |
| ATOM 8641 CB BARG C 148   | -40.438 | 35.677 | 12.516 | 0.50  | 62.45 |      | C0 |
| ANISOU 8641 CB BARG C 148 | 9940    | 6120   | 7670   | -1500 | 250   | 2050 | C0 |
| ATOM 8642 CG AARG C 148   | -40.559 | 37.068 | 12.615 | 0.50  | 65.37 |      | C0 |
| ANISOU 8642 CG AARG C 148 | 10600   | 6150   | 8090   | -1530 | 160   | 2150 | C0 |
| ATOM 8643 CG BARG C 148   | -41.164 | 36.872 | 11.914 | 0.50  | 65.14 |      | C0 |
| ANISOU 8643 CG BARG C 148 | 10560   | 6160   | 8030   | -1440 | 110   | 2240 | C0 |
| ATOM 8644 CD AARG C 148   | -39.922 | 37.876 | 11.495 | 0.50  | 68.10 |      | C0 |
| ANISOU 8644 CD AARG C 148 | 11160   | 6430   | 8290   | -1810 | 120   | 2360 | C0 |
| ATOM 8645 CD BARG C 148   | -41.111 | 38.116 | 12.786 | 0.50  | 66.92 |      | C0 |
| ANISOU 8645 CD BARG C 148 | 11030   | 6030   | 8370   | -1430 | 70    | 2230 | C0 |
| ATOM 8646 NE AARG C 148   | -38.464 | 37.835 | 11.516 | 0.50  | 68.39 |      | N0 |
| ANISOU 8646 NE AARG C 148 | 11160   | 6610   | 8210   | -2150 | 220   | 2320 | N0 |
| ATOM 8647 NE BARG C 148   | -41.256 | 37.863 | 14.215 | 0.50  | 65.31 |      | N0 |
| ANISOU 8647 NE BARG C 148 | 10720   | 5790   | 8300   | -1270 | 120   | 2010 | N0 |
| ATOM 8648 CZ AARG C 148   | -37.713 | 37.141 | 10.667 | 0.50  | 67.98 |      | C0 |
| ANISOU 8648 CZ AARG C 148 | 10950   | 6880   | 8000   | -2360 | 300   | 2340 | C0 |
| ATOM 8649 CZ BARG C 148   | -42.417 | 37.726 | 14.845 | 0.50  | 64.53 |      | C0 |
| ANISOU 8649 CZ BARG C 148 | 10570   | 5610   | 8330   | -950  | 90    | 1930 | C0 |
| ATOM 8650 NH1AARG C 148   | -38.280 | 36.422 | 9.713  | 0.50  | 67.34 |      | N0 |
| ANISOU 8650 NH1AARG C 148 | 10760   | 6980   | 7840   | -2260 | 280   | 2410 | N0 |
| ATOM 8651 NH1BARG C 148   | -43.551 | 37.792 | 14.168 | 0.50  | 65.26 |      | N0 |
| ANISOU 8651 NH1BARG C 148 | 10690   | 5660   | 8450   | -740  | -10   | 2050 | N0 |
| ATOM 8652 NH2AARG C 148   | -36.396 | 37.172 | 10.772 | 0.50  | 68.28 |      | N0 |
| ANISOU 8652 NH2AARG C 148 | 10950   | 7060   | 7940   | -2650 | 390   | 2290 | N0 |
| ATOM 8653 NH2BARG C 148   | -42.441 | 37.514 | 16.148 | 0.50  | 63.17 |      | N0 |
| ANISOU 8653 NH2BARG C 148 | 10310   | 5430   | 8260   | -840  | 150   | 1740 | N0 |
| ATOM 8654 H ARG C 148     | -39.920 | 34.260 | 14.563 | 1.00  | 58.35 |      | H0 |
| ANISOU 8654 H ARG C 148   | 9080    | 5820   | 7270   | -1390 | 410   | 1670 | H0 |
| ATOM 8655 HA AARG C 148   | -42.163 | 35.186 | 13.308 | 0.50  | 60.92 |      | H0 |
| ANISOU 8655 HA AARG C 148 | 9630    | 5860   | 7650   | -1050 | 200   | 1950 | H0 |
| ATOM 8656 HA BARG C 148   | -42.238 | 35.125 | 13.361 | 0.50  | 60.68 |      | H0 |
| ANISOU 8656 HA BARG C 148 | 9590    | 5840   | 7630   | -1030 | 200   | 1940 | H0 |
| ATOM 8657 HB2AARG C 148   | -39.419 | 35.375 | 12.816 | 0.50  | 62.03 |      | H0 |
| ANISOU 8657 HB2AARG C 148 | 9800    | 6200   | 7560   | -1680 | 340   | 1960 | H0 |
| ATOM 8658 HB2BARG C 148   | -39.784 | 36.002 | 13.169 | 0.50  | 62.60 |      | H0 |
| ANISOU 8658 HB2BARG C 148 | 10000   | 6070   | 7710   | -1610 | 290   | 1980 | H0 |
| ATOM 8659 HB3AARG C 148   | -40.314 | 35.349 | 11.513 | 0.50  | 62.90 |      | H0 |
| ANISOU 8659 HB3AARG C 148 | 9960    | 6330   | 7610   | -1590 | 250   | 2140 | H0 |
| ATOM 8660 HB3BARG C 148   | -39.950 | 35.212 | 11.805 | 0.50  | 62.22 |      | H0 |
| ANISOU 8660 HB3BARG C 148 | 9830    | 6290   | 7520   | -1640 | 290   | 2090 | H0 |
| ATOM 8661 HG2AARG C 148   | -41.526 | 37.236 | 12.618 | 0.50  | 65.67 |      | H0 |
| ANISOU 8661 HG2AARG C 148 | 10680   | 6070   | 8200   | -1310 | 90    | 2180 | H0 |
| ATOM 8662 HG2BARG C 148   | -40.766 | 37.081 | 11.042 | 0.50  | 66.27 |      | H0 |
| ANISOU 8662 HG2BARG C 148 | 10770   | 6350   | 8060   | -1610 | 100   | 2370 | H0 |
| ATOM 8663 HG3AARG C 148   | -40.197 | 37.373 | 13.474 | 0.50  | 65.34 |      | H0 |
| ANISOU 8663 HG3AARG C 148 | 10640   | 6040   | 8150   | -1560 | 200   | 2060 | H0 |
| ATOM 8664 HG3BARG C 148   | -42.104 | 36.633 | 11.763 | 0.50  | 64.79 |      | H0 |
| ANISOU 8664 HG3BARG C 148 | 10470   | 6120   | 8030   | -1230 | 60    | 2260 | H0 |

|                            |         |        |        |       |       |      |    |
|----------------------------|---------|--------|--------|-------|-------|------|----|
| ATOM 8665 HD2AARG C 148    | -40.238 | 37.531 | 10.632 | 0.50  | 68.10 | H0   |    |
| ANISOU 8665 HD2AARG C 148  | 11110   | 6550   | 8220   | -1790 | 90    | 2450 | H0 |
| ATOM 8666 HD2BARG C 148    | -40.254 | 38.569 | 12.634 | 0.50  | 67.95 | H0   |    |
| ANISOU 8666 HD2BARG C 148  | 11270   | 6130   | 8430   | -1670 | 90    | 2270 | H0 |
| ATOM 8667 HD3AARG C 148    | -40.215 | 38.809 | 11.568 | 0.50  | 69.85 | H0   |    |
| ANISOU 8667 HD3AARG C 148  | 11600   | 6380   | 8560   | -1780 | 40    | 2430 | H0 |
| ATOM 8668 HD3BARG C 148    | -41.822 | 38.729 | 12.502 | 0.50  | 68.33 | H0   |    |
| ANISOU 8668 HD3BARG C 148  | 11360   | 6020   | 8580   | -1310 | -30   | 2330 | H0 |
| ATOM 8669 HE AARG C 148    | -38.054 | 38.297 | 12.131 | 0.50  | 68.84 | H0   |    |
| ANISOU 8669 HE AARG C 148  | 11290   | 6550   | 8310   | -2230 | 240   | 2270 | H0 |
| ATOM 8670 HE BARG C 148    | -40.530 | 37.819 | 14.695 | 0.50  | 64.88 | H0   |    |
| ANISOU 8670 HE BARG C 148  | 10640   | 5770   | 8240   | -1400 | 190   | 1930 | H0 |
| ATOM 8671 HH11AARG C 148   | -39.156 | 36.402 | 9.642  | 0.50  | 67.18 | H0   |    |
| ANISOU 8671 HH11AARG C 148 | 10760   | 6880   | 7880   | -2070 | 210   | 2440 | H0 |
| ATOM 8672 HH11BARG C 148   | -43.535 | 37.937 | 13.301 | 0.50  | 66.15 | H0   |    |
| ANISOU 8672 HH11BARG C 148 | 10860   | 5790   | 8480   | -810  | -60   | 2180 | H0 |
| ATOM 8673 HH12AARG C 148   | -37.780 | 35.965 | 9.153  | 0.50  | 67.13 | H0   |    |
| ANISOU 8673 HH12AARG C 148 | 10640   | 7170   | 7700   | -2390 | 330   | 2420 | H0 |
| ATOM 8674 HH12BARG C 148   | -44.317 | 37.698 | 14.588 | 0.50  | 64.91 | H0   |    |
| ANISOU 8674 HH12BARG C 148 | 10590   | 5590   | 8490   | -520  | -30   | 1990 | H0 |
| ATOM 8675 HH21AARG C 148   | -36.018 | 37.651 | 11.407 | 0.50  | 68.78 | H0   |    |
| ANISOU 8675 HH21AARG C 148 | 11080   | 7000   | 8050   | -2720 | 400   | 2250 | H0 |
| ATOM 8676 HH21BARG C 148   | -41.686 | 37.464 | 16.598 | 0.50  | 62.79 | H0   |    |
| ANISOU 8676 HH21BARG C 148 | 10250   | 5410   | 8200   | -980  | 210   | 1670 | H0 |
| ATOM 8677 HH22AARG C 148   | -35.900 | 36.712 | 10.207 | 0.50  | 68.11 | H0   |    |
| ANISOU 8677 HH22AARG C 148 | 10820   | 7260   | 7810   | -2780 | 440   | 2300 | H0 |
| ATOM 8678 HH22BARG C 148   | -43.213 | 37.414 | 16.562 | 0.50  | 62.85 | H0   |    |
| ANISOU 8678 HH22BARG C 148 | 10230   | 5350   | 8300   | -630  | 130   | 1690 | H0 |
| ATOM 8679 N GLU C 149      | -41.249 | 32.246 | 12.836 | 1.00  | 56.41 | N0   |    |
| ANISOU 8679 N GLU C 149    | 8520    | 6010   | 6900   | -1160 | 380   | 1750 | N0 |
| ATOM 8680 CA GLU C 149     | -41.464 | 30.939 | 12.154 | 1.00  | 55.06 | C0   |    |
| ANISOU 8680 CA GLU C 149   | 8150    | 6130   | 6650   | -1120 | 400   | 1730 | C0 |
| ATOM 8681 C GLU C 149      | -42.433 | 30.075 | 12.969 | 1.00  | 53.52 | C0   |    |
| ANISOU 8681 C GLU C 149    | 7800    | 5980   | 6560   | -870  | 400   | 1600 | C0 |
| ATOM 8682 O GLU C 149      | -43.383 | 29.539 | 12.366 | 1.00  | 52.87 | O0   |    |
| ANISOU 8682 O GLU C 149    | 7650    | 5980   | 6460   | -740  | 350   | 1650 | O0 |
| ATOM 8683 CB GLU C 149     | -40.131 | 30.224 | 11.948 | 1.00  | 54.19 | C0   |    |
| ANISOU 8683 CB GLU C 149   | 7910    | 6260   | 6420   | -1340 | 500   | 1650 | C0 |
| ATOM 8684 CG GLU C 149     | -39.344 | 30.766 | 10.772 | 1.00  | 56.08 | C0   |    |
| ANISOU 8684 CG GLU C 149   | 8240    | 6560   | 6500   | -1590 | 510   | 1790 | C0 |
| ATOM 8685 CD GLU C 149     | -37.943 | 30.203 | 10.658 | 1.00  | 55.61 | C0   |    |
| ANISOU 8685 CD GLU C 149   | 8050    | 6750   | 6330   | -1810 | 620   | 1690 | C0 |
| ATOM 8686 OE1 GLU C 149    | -37.639 | 29.236 | 11.383 | 1.00  | 54.13 | O0   |    |
| ANISOU 8686 OE1 GLU C 149  | 7680    | 6710   | 6170   | -1740 | 680   | 1520 | O0 |
| ATOM 8687 OE2 GLU C 149    | -37.161 | 30.735 | 9.852  | 1.00  | 57.09 | O0   |    |
| ANISOU 8687 OE2 GLU C 149  | 8310    | 7000   | 6380   | -2050 | 640   | 1790 | O0 |
| ATOM 8688 H GLU C 149      | -40.807 | 32.166 | 13.626 | 1.00  | 55.76 | H0   |    |
| ANISOU 8688 H GLU C 149    | 8400    | 5920   | 6860   | -1190 | 430   | 1640 | H0 |
| ATOM 8689 HA GLU C 149     | -41.867 | 31.112 | 11.272 | 1.00  | 55.98 | H0   |    |
| ANISOU 8689 HA GLU C 149   | 8320    | 6240   | 6710   | -1120 | 350   | 1850 | H0 |
| ATOM 8690 HB2 GLU C 149    | -39.595 | 30.317 | 12.763 | 1.00  | 53.83 | H0   |    |
| ANISOU 8690 HB2 GLU C 149  | 7850    | 6190   | 6420   | -1380 | 550   | 1550 | H0 |
| ATOM 8691 HB3 GLU C 149    | -40.303 | 29.270 | 11.805 | 1.00  | 52.95 | H0   |    |
| ANISOU 8691 HB3 GLU C 149  | 7610    | 6280   | 6230   | -1270 | 520   | 1590 | H0 |

|                            |         |        |        |       |       |      |    |
|----------------------------|---------|--------|--------|-------|-------|------|----|
| ATOM 8692 HG2 GLU C 149    | -39.829 | 30.566 | 9.943  | 1.00  | 56.35 | H0   |    |
| ANISOU 8692 HG2 GLU C 149  | 8280    | 6660   | 6480   | -1560 | 470   | 1870 | H0 |
| ATOM 8693 HG3 GLU C 149    | -39.282 | 31.742 | 10.852 | 1.00  | 57.49 | H0   |    |
| ANISOU 8693 HG3 GLU C 149  | 8590    | 6550   | 6700   | -1660 | 470   | 1870 | H0 |
| ATOM 8694 N ILE C 150      | -42.179 | 29.926 | 14.274 | 1.00  | 53.00 | N0   |    |
| ANISOU 8694 N ILE C 150    | 7680    | 5870   | 6590   | -820  | 460   | 1440 | N0 |
| ATOM 8695 CA ILE C 150     | -43.075 | 29.227 | 15.243 | 1.00  | 51.91 | C0   |    |
| ANISOU 8695 CA ILE C 150   | 7410    | 5760   | 6560   | -600  | 460   | 1320 | C0 |
| ATOM 8696 C ILE C 150      | -43.360 | 30.164 | 16.420 | 1.00  | 53.50 | C0   |    |
| ANISOU 8696 C ILE C 150    | 7720    | 5710   | 6890   | -500  | 450   | 1260 | C0 |
| ATOM 8697 O ILE C 150      | -42.404 | 30.544 | 17.122 | 1.00  | 53.67 | O0   |    |
| ANISOU 8697 O ILE C 150    | 7800    | 5670   | 6920   | -630  | 500   | 1190 | O0 |
| ATOM 8698 CB ILE C 150     | -42.467 | 27.891 | 15.717 | 1.00  | 49.58 | C0   |    |
| ANISOU 8698 CB ILE C 150   | 6920    | 5690   | 6220   | -640  | 540   | 1170 | C0 |
| ATOM 8699 CG1 ILE C 150    | -42.497 | 26.836 | 14.610 | 1.00  | 48.86 | C0   |    |
| ANISOU 8699 CG1 ILE C 150  | 6720    | 5830   | 6020   | -670  | 530   | 1200 | C0 |
| ATOM 8700 CG2 ILE C 150    | -43.161 | 27.393 | 16.981 | 1.00  | 48.34 | C0   |    |
| ANISOU 8700 CG2 ILE C 150  | 6670    | 5520   | 6170   | -470  | 550   | 1030 | C0 |
| ATOM 8701 CD1 ILE C 150    | -41.882 | 25.513 | 15.004 | 1.00  | 46.82 | C0   |    |
| ANISOU 8701 CD1 ILE C 150  | 6290    | 5780   | 5720   | -700  | 600   | 1050 | C0 |
| ATOM 8702 H ILE C 150      | -41.417 | 30.244 | 14.660 | 1.00  | 53.20 | H0   |    |
| ANISOU 8702 H ILE C 150    | 7740    | 5860   | 6610   | -940  | 500   | 1400 | H0 |
| ATOM 8703 HA ILE C 150     | -43.916 | 29.033 | 14.795 | 1.00  | 52.02 | H0   |    |
| ANISOU 8703 HA ILE C 150   | 7400    | 5800   | 6570   | -490  | 410   | 1380 | H0 |
| ATOM 8704 HB ILE C 150     | -41.518 | 28.060 | 15.942 | 1.00  | 49.73 | H0   |    |
| ANISOU 8704 HB ILE C 150   | 6960    | 5720   | 6220   | -780  | 580   | 1130 | H0 |
| ATOM 8705 HG12 ILE C 150   | -43.429 | 26.683 | 14.346 | 1.00  | 48.82 | H0   |    |
| ANISOU 8705 HG12 ILE C 150 | 6690    | 5830   | 6030   | -550  | 480   | 1250 | H0 |
| ATOM 8706 HG13 ILE C 150   | -42.017 | 27.185 | 13.829 | 1.00  | 49.79 | H0   |    |
| ANISOU 8706 HG13 ILE C 150 | 6890    | 5970   | 6060   | -800  | 530   | 1280 | H0 |
| ATOM 8707 HG21 ILE C 150   | -42.915 | 27.957 | 17.734 | 1.00  | 48.63 | H0   |    |
| ANISOU 8707 HG21 ILE C 150 | 6770    | 5430   | 6270   | -470  | 570   | 980  | H0 |
| ATOM 8708 HG22 ILE C 150   | -42.889 | 26.478 | 17.167 | 1.00  | 47.07 | H0   |    |
| ANISOU 8708 HG22 ILE C 150 | 6400    | 5500   | 5980   | -480  | 580   | 950  | H0 |
| ATOM 8709 HG23 ILE C 150   | -44.126 | 27.423 | 16.857 | 1.00  | 48.50 | H0   |    |
| ANISOU 8709 HG23 ILE C 150 | 6690    | 5510   | 6230   | -330  | 500   | 1070 | H0 |
| ATOM 8710 HD11 ILE C 150   | -41.106 | 25.669 | 15.568 | 1.00  | 46.77 | H0   |    |
| ANISOU 8710 HD11 ILE C 150 | 6280    | 5760   | 5720   | -780  | 640   | 980  | H0 |
| ATOM 8711 HD12 ILE C 150   | -41.609 | 25.030 | 14.205 | 1.00  | 46.85 | H0   |    |
| ANISOU 8711 HD12 ILE C 150 | 6250    | 5920   | 5630   | -760  | 600   | 1070 | H0 |
| ATOM 8712 HD13 ILE C 150   | -42.535 | 24.982 | 15.492 | 1.00  | 45.98 | H0   |    |
| ANISOU 8712 HD13 ILE C 150 | 6120    | 5690   | 5660   | -580  | 580   | 1000 | H0 |
| ATOM 8713 N SER C 151      | -44.635 | 30.504 | 16.623 | 1.00  | 55.31 | N0   |    |
| ANISOU 8713 N SER C 151    | 7980    | 5830   | 7210   | -280  | 390   | 1290 | N0 |
| ATOM 8714 CA SER C 151     | -45.170 | 31.077 | 17.883 | 1.00  | 56.89 | C0   |    |
| ANISOU 8714 CA SER C 151   | 8230    | 5850   | 7540   | -120  | 390   | 1190 | C0 |
| ATOM 8715 C SER C 151      | -45.832 | 29.952 | 18.680 | 1.00  | 55.93 | C0   |    |
| ANISOU 8715 C SER C 151    | 7900    | 5900   | 7450   | 20    | 430   | 1050 | C0 |
| ATOM 8716 O SER C 151      | -46.466 | 29.093 | 18.049 | 1.00  | 55.02 | O0   |    |
| ANISOU 8716 O SER C 151    | 7650    | 5960   | 7290   | 80    | 400   | 1090 | O0 |
| ATOM 8717 CB SER C 151     | -46.133 | 32.203 | 17.614 | 1.00  | 59.25 | C0   |    |
| ANISOU 8717 CB SER C 151   | 8680    | 5920   | 7910   | 40    | 290   | 1290 | C0 |
| ATOM 8718 OG SER C 151     | -47.299 | 31.725 | 16.965 | 1.00  | 59.77 | O0   |    |
| ANISOU 8718 OG SER C 151   | 8640    | 6100   | 7970   | 210   | 230   | 1360 | O0 |



|                            |         |        |        |      |       |      |    |
|----------------------------|---------|--------|--------|------|-------|------|----|
| ATOM 8719 H SER C 151      | -45.281 | 30.408 | 15.988 | 1.00 | 55.63 |      | H0 |
| ANISOU 8719 H SER C 151    | 8010    | 5900   | 7230   | -210 | 340   | 1370 | H0 |
| ATOM 8720 HA SER C 151     | -44.407 | 31.431 | 18.411 | 1.00 | 56.98 |      | H0 |
| ANISOU 8720 HA SER C 151   | 8300    | 5790   | 7560   | -230 | 430   | 1130 | H0 |
| ATOM 8721 HB2 SER C 151    | -46.384 | 32.630 | 18.463 | 1.00 | 59.67 |      | H0 |
| ANISOU 8721 HB2 SER C 151  | 8770    | 5860   | 8040   | 140  | 300   | 1210 | H0 |
| ATOM 8722 HB3 SER C 151    | -45.696 | 32.879 | 17.048 | 1.00 | 60.61 |      | H0 |
| ANISOU 8722 HB3 SER C 151  | 9000    | 5990   | 8050   | -60  | 260   | 1390 | H0 |
| ATOM 8723 N VAL C 152      | -45.677 | 29.959 | 20.007 | 1.00 | 57.01 |      | N0 |
| ANISOU 8723 N VAL C 152    | 8010    | 5990   | 7660   | 60   | 480   | 900  | N0 |
| ATOM 8724 CA VAL C 152     | -46.294 | 28.963 | 20.935 | 1.00 | 57.30 |      | C0 |
| ANISOU 8724 CA VAL C 152   | 7870    | 6170   | 7730   | 180  | 520   | 770  | C0 |
| ATOM 8725 C VAL C 152      | -47.240 | 29.706 | 21.884 | 1.00 | 59.87 |      | C0 |
| ANISOU 8725 C VAL C 152    | 8240    | 6350   | 8160   | 380  | 510   | 700  | C0 |
| ATOM 8726 O VAL C 152      | -46.814 | 30.722 | 22.460 | 1.00 | 61.38 |      | O0 |
| ANISOU 8726 O VAL C 152    | 8580    | 6340   | 8400   | 360  | 520   | 670  | O0 |
| ATOM 8727 CB VAL C 152     | -45.235 | 28.145 | 21.702 | 1.00 | 55.63 |      | C0 |
| ANISOU 8727 CB VAL C 152   | 7580    | 6080   | 7480   | 30   | 600   | 640  | C0 |
| ATOM 8728 CG1 VAL C 152    | -44.431 | 27.257 | 20.767 | 1.00 | 54.75 |      | C0 |
| ANISOU 8728 CG1 VAL C 152  | 7390    | 6150   | 7260   | -120 | 610   | 690  | C0 |
| ATOM 8729 CG2 VAL C 152    | -44.305 | 29.019 | 22.528 | 1.00 | 56.63 |      | C0 |
| ANISOU 8729 CG2 VAL C 152  | 7830    | 6050   | 7640   | -70  | 640   | 570  | C0 |
| ATOM 8730 H VAL C 152      | -45.189 | 30.598 | 20.435 | 1.00 | 57.66 |      | H0 |
| ANISOU 8730 H VAL C 152    | 8190    | 5950   | 7770   | 0    | 500   | 880  | H0 |
| ATOM 8731 HA VAL C 152     | -46.821 | 28.345 | 20.404 | 1.00 | 56.73 |      | H0 |
| ANISOU 8731 HA VAL C 152   | 7710    | 6220   | 7620   | 220  | 500   | 810  | H0 |
| ATOM 8732 HB VAL C 152     | -45.721 | 27.554 | 22.328 | 1.00 | 54.85 |      | H0 |
| ANISOU 8732 HB VAL C 152   | 7380    | 6060   | 7400   | 120  | 620   | 570  | H0 |
| ATOM 8733 HG11 VAL C 152   | -45.028 | 26.633 | 20.319 | 1.00 | 54.25 |      | H0 |
| ANISOU 8733 HG11 VAL C 152 | 7250    | 6190   | 7170   | -60  | 590   | 720  | H0 |
| ATOM 8734 HG12 VAL C 152   | -43.769 | 26.761 | 21.279 | 1.00 | 53.82 |      | H0 |
| ANISOU 8734 HG12 VAL C 152 | 7220    | 6110   | 7120   | -190 | 650   | 600  | H0 |
| ATOM 8735 HG13 VAL C 152   | -43.980 | 27.807 | 20.103 | 1.00 | 55.62 |      | H0 |
| ANISOU 8735 HG13 VAL C 152 | 7590    | 6210   | 7340   | -210 | 600   | 770  | H0 |
| ATOM 8736 HG21 VAL C 152   | -43.839 | 29.639 | 21.944 | 1.00 | 57.46 |      | H0 |
| ANISOU 8736 HG21 VAL C 152 | 8040    | 6070   | 7720   | -160 | 620   | 650  | H0 |
| ATOM 8737 HG22 VAL C 152   | -43.655 | 28.457 | 22.984 | 1.00 | 55.48 |      | H0 |
| ANISOU 8737 HG22 VAL C 152 | 7620    | 5990   | 7470   | -150 | 680   | 500  | H0 |
| ATOM 8738 HG23 VAL C 152   | -44.818 | 29.516 | 23.188 | 1.00 | 57.10 |      | H0 |
| ANISOU 8738 HG23 VAL C 152 | 7930    | 6000   | 7770   | 40   | 630   | 530  | H0 |
| ATOM 8739 N ASP C 153      | -48.478 | 29.220 | 22.021 | 1.00 | 61.96 |      | N0 |
| ANISOU 8739 N ASP C 153    | 8370    | 6720   | 8450   | 560  | 490   | 680  | N0 |
| ATOM 8740 CA ASP C 153     | -49.529 | 29.816 | 22.890 | 1.00 | 65.43 |      | C0 |
| ANISOU 8740 CA ASP C 153   | 8810    | 7070   | 8990   | 780  | 480   | 610  | C0 |
| ATOM 8741 C ASP C 153      | -50.146 | 28.721 | 23.753 | 1.00 | 65.35 |      | C0 |
| ANISOU 8741 C ASP C 153    | 8600    | 7260   | 8970   | 840  | 540   | 490  | C0 |
| ATOM 8742 O ASP C 153      | -50.322 | 27.596 | 23.292 | 1.00 | 62.71 |      | O0 |
| ANISOU 8742 O ASP C 153    | 8130    | 7130   | 8570   | 790  | 530   | 510  | O0 |
| ATOM 8743 CB ASP C 153     | -50.593 | 30.533 | 22.056 | 1.00 | 68.46 |      | C0 |
| ANISOU 8743 CB ASP C 153   | 9240    | 7370   | 9410   | 960  | 390   | 720  | C0 |
| ATOM 8744 CG ASP C 153     | -50.164 | 31.916 | 21.595 | 1.00 | 71.73 |      | C0 |
| ANISOU 8744 CG ASP C 153   | 9900    | 7500   | 9850   | 950  | 330   | 820  | C0 |
| ATOM 8745 OD1 ASP C 153    | -50.316 | 32.872 | 22.388 | 1.00 | 73.69 |      | O0 |
| ANISOU 8745 OD1 ASP C 153  | 10260   | 7550   | 10190  | 1050 | 330   | 740  | O0 |

|                           |         |        |        |      |       |     |    |
|---------------------------|---------|--------|--------|------|-------|-----|----|
| ATOM 8746 OD2 ASP C 153   | -49.661 | 32.023 | 20.455 | 1.00 | 73.63 | O0  |    |
| ANISOU 8746 OD2 ASP C 153 | 10220   | 7720   | 10030  | 820  | 280   | 960 | O0 |
| ATOM 8747 H ASP C 153     | -48.758 | 28.475 | 21.577 | 1.00 | 61.17 | H0  |    |
| ANISOU 8747 H ASP C 153   | 8170    | 6760   | 8310   | 560  | 480   | 710 | H0 |
| ATOM 8748 HA ASP C 153    | -49.101 | 30.479 | 23.478 | 1.00 | 66.03 | H0  |    |
| ANISOU 8748 HA ASP C 153  | 8990    | 7000   | 9100   | 760  | 500   | 550 | H0 |
| ATOM 8749 HB2 ASP C 153   | -50.799 | 29.993 | 21.266 | 1.00 | 68.04 | H0  |    |
| ANISOU 8749 HB2 ASP C 153 | 9110    | 7430   | 9300   | 940  | 360   | 800 | H0 |
| ATOM 8750 HB3 ASP C 153   | -51.411 | 30.624 | 22.586 | 1.00 | 68.94 | H0  |    |
| ANISOU 8750 HB3 ASP C 153 | 9240    | 7440   | 9520   | 1120 | 390   | 660 | H0 |
| ATOM 8751 N PRO C 154     | -50.470 | 29.012 | 25.034 | 1.00 | 68.17 | N0  |    |
| ANISOU 8751 N PRO C 154   | 8940    | 7580   | 9380   | 930  | 580   | 350 | N0 |
| ATOM 8752 CA PRO C 154    | -51.168 | 28.056 | 25.892 | 1.00 | 69.31 | C0  |    |
| ANISOU 8752 CA PRO C 154  | 8900    | 7920   | 9510   | 990  | 630   | 240 | C0 |
| ATOM 8753 C PRO C 154     | -52.690 | 28.091 | 25.684 | 1.00 | 73.48 | C0  |    |
| ANISOU 8753 C PRO C 154   | 9310    | 8540   | 10060  | 1200 | 590   | 260 | C0 |
| ATOM 8754 O PRO C 154     | -53.234 | 29.173 | 25.547 | 1.00 | 75.56 | O0  |    |
| ANISOU 8754 O PRO C 154   | 9650    | 8660   | 10400  | 1370 | 550   | 280 | O0 |
| ATOM 8755 CB PRO C 154    | -50.766 | 28.529 | 27.295 | 1.00 | 68.60 | C0  |    |
| ANISOU 8755 CB PRO C 154  | 8880    | 7730   | 9460   | 990  | 700   | 90  | C0 |
| ATOM 8756 CG PRO C 154    | -50.648 | 30.030 | 27.154 | 1.00 | 69.95 | C0  |    |
| ANISOU 8756 CG PRO C 154  | 9240    | 7630   | 9700   | 1070 | 660   | 110 | C0 |
| ATOM 8757 CD PRO C 154    | -50.149 | 30.261 | 25.740 | 1.00 | 69.84 | C0  |    |
| ANISOU 8757 CD PRO C 154  | 9330    | 7550   | 9660   | 980  | 590   | 280 | C0 |
| ATOM 8758 HA PRO C 154    | -50.817 | 27.145 | 25.734 | 1.00 | 67.87 | H0  |    |
| ANISOU 8758 HA PRO C 154  | 8650    | 7870   | 9270   | 880  | 650   | 250 | H0 |
| ATOM 8759 HB2 PRO C 154   | -51.448 | 28.290 | 27.957 | 1.00 | 68.78 | H0  |    |
| ANISOU 8759 HB2 PRO C 154 | 8810    | 7840   | 9490   | 1080 | 730   | 10  | H0 |
| ATOM 8760 HB3 PRO C 154   | -49.909 | 28.135 | 27.566 | 1.00 | 67.60 | H0  |    |
| ANISOU 8760 HB3 PRO C 154 | 8760    | 7620   | 9300   | 850  | 730   | 60  | H0 |
| ATOM 8761 HG2 PRO C 154   | -51.518 | 30.460 | 27.287 | 1.00 | 71.20 | H0  |    |
| ANISOU 8761 HG2 PRO C 154 | 9380    | 7760   | 9910   | 1240 | 640   | 90  | H0 |
| ATOM 8762 HG3 PRO C 154   | -50.015 | 30.391 | 27.807 | 1.00 | 70.09 | H0  |    |
| ANISOU 8762 HG3 PRO C 154 | 9340    | 7550   | 9730   | 1010 | 700   | 40  | H0 |
| ATOM 8763 HD2 PRO C 154   | -50.602 | 31.020 | 25.329 | 1.00 | 71.33 | H0  |    |
| ANISOU 8763 HD2 PRO C 154 | 9590    | 7620   | 9900   | 1090 | 540   | 340 | H0 |
| ATOM 8764 HD3 PRO C 154   | -49.188 | 30.427 | 25.734 | 1.00 | 69.56 | H0  |    |
| ANISOU 8764 HD3 PRO C 154 | 9380    | 7440   | 9610   | 830  | 610   | 290 | H0 |
| ATOM 8765 N THR C 155     | -53.327 | 26.914 | 25.665 | 1.00 | 76.87 | N0  |    |
| ANISOU 8765 N THR C 155   | 9560    | 9220   | 10440  | 1190 | 600   | 250 | N0 |
| ATOM 8766 CA THR C 155    | -54.792 | 26.720 | 25.462 | 1.00 | 81.18 | C0  |    |
| ANISOU 8766 CA THR C 155  | 9940    | 9920   | 10990  | 1360 | 570   | 270 | C0 |
| ATOM 8767 C THR C 155     | -55.488 | 26.732 | 26.831 | 1.00 | 85.10 | C0  |    |
| ANISOU 8767 C THR C 155   | 10330   | 10490  | 11510  | 1470 | 640   | 110 | C0 |
| ATOM 8768 O THR C 155     | -55.755 | 25.637 | 27.373 | 1.00 | 84.90 | O0  |    |
| ANISOU 8768 O THR C 155   | 10170   | 10680  | 11420  | 1390 | 680   | 50  | O0 |
| ATOM 8769 CB THR C 155    | -55.067 | 25.428 | 24.678 | 1.00 | 80.44 | C0  |    |
| ANISOU 8769 CB THR C 155  | 9710    | 10050  | 10810  | 1260 | 540   | 340 | C0 |
| ATOM 8770 OG1 THR C 155   | -53.941 | 25.161 | 23.838 | 1.00 | 80.09 | O0  |    |
| ANISOU 8770 OG1 THR C 155 | 9770    | 9940   | 10720  | 1090 | 520   | 430 | O0 |
| ATOM 8771 CG2 THR C 155   | -56.332 | 25.503 | 23.850 | 1.00 | 81.47 | C0  |    |
| ANISOU 8771 CG2 THR C 155 | 9730    | 10290  | 10940  | 1410 | 460   | 430 | C0 |
| ATOM 8772 H THR C 155     | -52.891 | 26.122 | 25.781 | 1.00 | 75.13 | H0  |    |
| ANISOU 8772 H THR C 155   | 9290    | 9090   | 10170  | 1070 | 630   | 230 | H0 |

|                            |         |        |        |      |        |      |    |
|----------------------------|---------|--------|--------|------|--------|------|----|
| ATOM 8773 HA THR C 155     | -55.128 | 27.481 | 24.935 | 1.00 | 82.55  |      | H0 |
| ANISOU 8773 HA THR C 155   | 10170   | 9990   | 11200  | 1480 | 510    | 330  | H0 |
| ATOM 8774 HB THR C 155     | -55.158 | 24.687 | 25.322 | 1.00 | 79.56  |      | H0 |
| ANISOU 8774 HB THR C 155   | 9510    | 10060  | 10660  | 1200 | 580    | 270  | H0 |
| ATOM 8775 HG21 THR C 155   | -57.095 | 25.657 | 24.434 | 1.00 | 82.34  |      | H0 |
| ANISOU 8775 HG21 THR C 155 | 9750    | 10460  | 11070  | 1530 | 480    | 360  | H0 |
| ATOM 8776 HG22 THR C 155   | -56.457 | 24.665 | 23.369 | 1.00 | 80.73  |      | H0 |
| ANISOU 8776 HG22 THR C 155 | 9560    | 10330  | 10780  | 1330 | 440    | 470  | H0 |
| ATOM 8777 HG23 THR C 155   | -56.260 | 26.234 | 23.211 | 1.00 | 82.47  |      | H0 |
| ANISOU 8777 HG23 THR C 155 | 9950    | 10290  | 11100  | 1470 | 410    | 510  | H0 |
| ATOM 8778 N THR C 156      | -55.772 | 27.925 | 27.366 | 1.00 | 89.77  |      | N0 |
| ANISOU 8778 N THR C 156    | 11000   | 10930  | 12180  | 1640 | 640    | 40   | N0 |
| ATOM 8779 CA THR C 156     | -56.147 | 28.146 | 28.792 | 1.00 | 92.07  |      | C0 |
| ANISOU 8779 CA THR C 156   | 11240   | 11250  | 12490  | 1730 | 720    | -130 | C0 |
| ATOM 8780 C THR C 156      | -57.646 | 28.450 | 28.917 | 1.00 | 95.30  |      | C0 |
| ANISOU 8780 C THR C 156    | 11490   | 11790  | 12930  | 1980 | 710    | -170 | C0 |
| ATOM 8781 O THR C 156      | -57.985 | 29.580 | 29.319 | 1.00 | 97.44  |      | O0 |
| ANISOU 8781 O THR C 156    | 11830   | 11910  | 13280  | 2180 | 710    | -250 | O0 |
| ATOM 8782 CB THR C 156     | -55.281 | 29.250 | 29.414 | 1.00 | 92.53  |      | C0 |
| ANISOU 8782 CB THR C 156   | 11510   | 11030  | 12610  | 1730 | 750    | -210 | C0 |
| ATOM 8783 OG1 THR C 156    | -55.512 | 30.462 | 28.695 | 1.00 | 94.85  |      | O0 |
| ANISOU 8783 OG1 THR C 156  | 11940   | 11110  | 12980  | 1900 | 670    | -130 | O0 |
| ATOM 8784 CG2 THR C 156    | -53.805 | 28.916 | 29.395 | 1.00 | 89.84  |      | C0 |
| ANISOU 8784 CG2 THR C 156  | 11290   | 10610  | 12230  | 1480 | 770    | -180 | C0 |
| ATOM 8785 H THR C 156      | -55.757 | 28.699 | 26.887 | 1.00 | 90.51  |      | H0 |
| ANISOU 8785 H THR C 156    | 11190   | 10880  | 12320  | 1720 | 600    | 100  | H0 |
| ATOM 8786 HA THR C 156     | -55.966 | 27.309 | 29.279 | 1.00 | 90.65  |      | H0 |
| ANISOU 8786 HA THR C 156   | 10990   | 11200  | 12250  | 1610 | 770    | -170 | H0 |
| ATOM 8787 HB THR C 156     | -55.565 | 29.375 | 30.351 | 1.00 | 92.93  |      | H0 |
| ANISOU 8787 HB THR C 156   | 11520   | 11120  | 12670  | 1800 | 800    | -330 | H0 |
| ATOM 8788 HG21 THR C 156   | -53.661 | 28.053 | 29.823 | 1.00 | 88.81  |      | H0 |
| ANISOU 8788 HG21 THR C 156 | 11080   | 10620  | 12050  | 1380 | 810    | -220 | H0 |
| ATOM 8789 HG22 THR C 156   | -53.310 | 29.603 | 29.876 | 1.00 | 90.65  |      | H0 |
| ANISOU 8789 HG22 THR C 156 | 11520   | 10550  | 12370  | 1480 | 790    | -240 | H0 |
| ATOM 8790 HG23 THR C 156   | -53.494 | 28.878 | 28.474 | 1.00 | 89.75  |      | H0 |
| ANISOU 8790 HG23 THR C 156 | 11330   | 10560  | 12210  | 1430 | 720    | -70  | H0 |
| ATOM 8791 N GLU C 157      | -58.500 | 27.470 | 28.599 | 1.00 | 97.00  |      | N0 |
| ANISOU 8791 N GLU C 157    | 11500   | 12270  | 13080  | 1960 | 700    | -140 | N0 |
| ATOM 8792 CA GLU C 157     | -59.958 | 27.485 | 28.916 | 1.00 | 99.95  |      | C0 |
| ANISOU 8792 CA GLU C 157   | 11660   | 12860  | 13460  | 2160 | 710    | -200 | C0 |
| ATOM 8793 C GLU C 157      | -60.147 | 26.954 | 30.347 | 1.00 | 99.73  |      | C0 |
| ANISOU 8793 C GLU C 157    | 11520   | 13000  | 13380  | 2100 | 820    | -370 | C0 |
| ATOM 8794 O GLU C 157      | -59.150 | 26.478 | 30.937 | 1.00 | 98.69  |      | O0 |
| ANISOU 8794 O GLU C 157    | 11480   | 12820  | 13200  | 1900 | 880    | -400 | O0 |
| ATOM 8795 CB GLU C 157     | -60.752 | 26.697 | 27.864 | 1.00 | 100.29 |      | C0 |
| ANISOU 8795 CB GLU C 157   | 11530   | 13120  | 13450  | 2140 | 640    | -80  | C0 |
| ATOM 8796 CG GLU C 157     | -60.821 | 25.194 | 28.098 | 1.00 | 98.43  |      | C0 |
| ANISOU 8796 CG GLU C 157   | 11160   | 13140  | 13100  | 1920 | 680    | -80  | C0 |
| ATOM 8797 CD GLU C 157     | -59.480 | 24.494 | 28.241 | 1.00 | 96.44  |      | C0 |
| ANISOU 8797 CD GLU C 157   | 11040   | 12790  | 12800  | 1670 | 710    | -60  | C0 |
| ATOM 8798 OE1 GLU C 157    | -58.578 | 24.772 | 27.422 | 1.00 | 95.89  |      | O0 |
| ANISOU 8798 OE1 GLU C 157  | 11140   | 12540  | 12760  | 1610 | 660    | 30   | O0 |
| ATOM 8799 OE2 GLU C 157    | -59.336 | 23.685 | 29.179 | 1.00 | 95.73  |      | O0 |
| ANISOU 8799 OE2 GLU C 157  | 10900   | 12820  | 12650  | 1530 | 780    | -150 | O0 |

|        |      |      |     |   |     |         |        |        |      |        |      |    |
|--------|------|------|-----|---|-----|---------|--------|--------|------|--------|------|----|
| ATOM   | 8800 | H    | GLU | C | 157 | -58.232 | 26.726 | 28.151 | 1.00 | 95.52  |      | H0 |
| ANISOU | 8800 | H    | GLU | C | 157 | 11290   | 12160  | 12850  | 1830 | 690    | -70  | H0 |
| ATOM   | 8801 | HA   | GLU | C | 157 | -60.263 | 28.421 | 28.894 | 1.00 | 101.43 |      | H0 |
| ANISOU | 8801 | HA   | GLU | C | 157 | 11890   | 12930  | 13710  | 2340 | 680    | -230 | H0 |
| ATOM   | 8802 | HB2  | GLU | C | 157 | -61.665 | 27.052 | 27.839 | 1.00 | 101.73 |      | H0 |
| ANISOU | 8802 | HB2  | GLU | C | 157 | 11610   | 13390  | 13650  | 2320 | 620    | -100 | H0 |
| ATOM   | 8803 | HB3  | GLU | C | 157 | -60.347 | 26.860 | 26.987 | 1.00 | 99.86  |      | H0 |
| ANISOU | 8803 | HB3  | GLU | C | 157 | 11580   | 12960  | 13410  | 2110 | 580    | 30   | H0 |
| ATOM   | 8804 | HG2  | GLU | C | 157 | -61.346 | 25.023 | 28.909 | 1.00 | 99.00  |      | H0 |
| ANISOU | 8804 | HG2  | GLU | C | 157 | 11110   | 13350  | 13150  | 1950 | 740    | -180 | H0 |
| ATOM   | 8805 | HG3  | GLU | C | 157 | -61.301 | 24.783 | 27.348 | 1.00 | 98.58  |      | H0 |
| ANISOU | 8805 | HG3  | GLU | C | 157 | 11090   | 13280  | 13090  | 1910 | 630    | 0    | H0 |
| ATOM   | 8806 | N    | ASN | C | 158 | -61.369 | 27.043 | 30.887 | 1.00 | 100.42 |      | N0 |
| ANISOU | 8806 | N    | ASN | C | 158 | 11410   | 13290  | 13460  | 2270 | 860    | -460 | N0 |
| ATOM   | 8807 | CA   | ASN | C | 158 | -61.705 | 26.624 | 32.277 | 1.00 | 99.49  |      | C0 |
| ANISOU | 8807 | CA   | ASN | C | 158 | 11170   | 13360  | 13270  | 2220 | 970    | -620 | C0 |
| ATOM   | 8808 | C    | ASN | C | 158 | -61.933 | 25.107 | 32.310 | 1.00 | 96.49  |      | C0 |
| ANISOU | 8808 | C    | ASN | C | 158 | 10630   | 13260  | 12770  | 1990 | 990    | -580 | C0 |
| ATOM   | 8809 | O    | ASN | C | 158 | -63.007 | 24.655 | 31.857 | 1.00 | 96.75  |      | O0 |
| ANISOU | 8809 | O    | ASN | C | 158 | 10460   | 13530  | 12760  | 2040 | 970    | -540 | O0 |
| ATOM   | 8810 | CB   | ASN | C | 158 | -62.905 | 27.397 | 32.834 | 1.00 | 102.46 |      | C0 |
| ANISOU | 8810 | CB   | ASN | C | 158 | 11390   | 13850  | 13680  | 2500 | 1010   | -760 | C0 |
| ATOM   | 8811 | CG   | ASN | C | 158 | -62.553 | 28.810 | 33.254 | 1.00 | 104.11 |      | C0 |
| ANISOU | 8811 | CG   | ASN | C | 158 | 11790   | 13780  | 14000  | 2710 | 1010   | -860 | C0 |
| ATOM   | 8812 | OD1  | ASN | C | 158 | -61.789 | 29.011 | 34.196 | 1.00 | 103.24 |      | O0 |
| ANISOU | 8812 | OD1  | ASN | C | 158 | 11800   | 13540  | 13880  | 2620 | 1080   | -960 | O0 |
| ATOM   | 8813 | ND2  | ASN | C | 158 | -63.108 | 29.796 | 32.567 | 1.00 | 106.05 |      | N0 |
| ANISOU | 8813 | ND2  | ASN | C | 158 | 12060   | 13900  | 14330  | 2970 | 930    | -830 | N0 |
| ATOM   | 8814 | H    | ASN | C | 158 | -62.081 | 27.369 | 30.422 | 1.00 | 101.67 |      | H0 |
| ANISOU | 8814 | H    | ASN | C | 158 | 11490   | 13500  | 13640  | 2420 | 810    | -430 | H0 |
| ATOM   | 8815 | HA   | ASN | C | 158 | -60.931 | 26.833 | 32.852 | 1.00 | 98.83  |      | H0 |
| ANISOU | 8815 | HA   | ASN | C | 158 | 11210   | 13140  | 13200  | 2160 | 1010   | -680 | H0 |
| ATOM   | 8816 | HB2  | ASN | C | 158 | -63.606 | 27.430 | 32.152 | 1.00 | 103.29 |      | H0 |
| ANISOU | 8816 | HB2  | ASN | C | 158 | 11390   | 14050  | 13800  | 2610 | 950    | -700 | H0 |
| ATOM   | 8817 | HB3  | ASN | C | 158 | -63.260 | 26.914 | 33.609 | 1.00 | 102.46 |      | H0 |
| ANISOU | 8817 | HB3  | ASN | C | 158 | 11270   | 14040  | 13620  | 2450 | 1080   | -840 | H0 |
| ATOM   | 8818 | HD21 | ASN | C | 158 | -63.211 | 30.592 | 32.941 | 1.00 | 107.50 |      | H0 |
| ANISOU | 8818 | HD21 | ASN | C | 158 | 12300   | 13980  | 14570  | 3130 | 940    | -910 | H0 |
| ATOM   | 8819 | HD22 | ASN | C | 158 | -63.373 | 29.662 | 31.734 | 1.00 | 106.08 |      | H0 |
| ANISOU | 8819 | HD22 | ASN | C | 158 | 12020   | 13940  | 14350  | 2990 | 860    | -720 | H0 |
| ATOM   | 8820 | N    | SER | C | 159 | -60.943 | 24.363 | 32.817 | 1.00 | 92.57  |      | N0 |
| ANISOU | 8820 | N    | SER | C | 159 | 10240   | 12720  | 12220  | 1750 | 1030   | -580 | N0 |
| ATOM   | 8821 | CA   | SER | C | 159 | -60.967 | 22.890 | 33.028 | 1.00 | 89.12  |      | C0 |
| ANISOU | 8821 | CA   | SER | C | 159 | 9710    | 12500  | 11660  | 1510 | 1050   | -550 | C0 |
| ATOM   | 8822 | C    | SER | C | 159 | -60.328 | 22.554 | 34.381 | 1.00 | 85.79  |      | C0 |
| ANISOU | 8822 | C    | SER | C | 159 | 9350    | 12070  | 11180  | 1370 | 1140   | -670 | C0 |
| ATOM   | 8823 | O    | SER | C | 159 | -59.493 | 23.352 | 34.859 | 1.00 | 85.97  |      | O0 |
| ANISOU | 8823 | O    | SER | C | 159 | 9530    | 11880  | 11260  | 1410 | 1170   | -730 | O0 |
| ATOM   | 8824 | CB   | SER | C | 159 | -60.264 | 22.163 | 31.903 | 1.00 | 87.90  |      | C0 |
| ANISOU | 8824 | CB   | SER | C | 159 | 9640    | 12270  | 11490  | 1350 | 970    | -400 | C0 |
| ATOM   | 8825 | OG   | SER | C | 159 | -61.057 | 22.151 | 30.724 | 1.00 | 89.08  |      | O0 |
| ANISOU | 8825 | OG   | SER | C | 159 | 9690    | 12510  | 11650  | 1440 | 890    | -290 | O0 |
| ATOM   | 8826 | H    | SER | C | 159 | -60.147 | 24.725 | 33.074 | 1.00 | 92.03  |      | H0 |
| ANISOU | 8826 | H    | SER | C | 159 | 10310   | 12480  | 12180  | 1720 | 1050   | -610 | H0 |

|                           |         |        |        |      |       |      |    |
|---------------------------|---------|--------|--------|------|-------|------|----|
| ATOM 8827 HA SER C 159    | -61.917 | 22.595 | 33.049 | 1.00 | 90.00 |      | H0 |
| ANISOU 8827 HA SER C 159  | 9650    | 12820  | 11730  | 1540 | 1060  | -560 | H0 |
| ATOM 8828 HB2 SER C 159   | -59.405 | 22.606 | 31.716 | 1.00 | 87.25 |      | H0 |
| ANISOU 8828 HB2 SER C 159 | 9710    | 11990  | 11450  | 1350 | 950   | -380 | H0 |
| ATOM 8829 HB3 SER C 159   | -60.076 | 21.238 | 32.180 | 1.00 | 86.73 |      | H0 |
| ANISOU 8829 HB3 SER C 159 | 9480    | 12210  | 11270  | 1190 | 980   | -390 | H0 |
| ATOM 8830 N ASP C 160     | -60.721 | 21.423 | 34.977 | 1.00 | 81.63 |      | N0 |
| ANISOU 8830 N ASP C 160   | 8700    | 11780  | 10530  | 1200 | 1180  | -680 | N0 |
| ATOM 8831 CA ASP C 160    | -60.066 | 20.836 | 36.176 | 1.00 | 77.88 |      | C0 |
| ANISOU 8831 CA ASP C 160  | 8300    | 11320  | 9970   | 1010 | 1240  | -760 | C0 |
| ATOM 8832 C ASP C 160     | -58.667 | 20.373 | 35.754 | 1.00 | 73.68 |      | C0 |
| ANISOU 8832 C ASP C 160   | 7960    | 10580  | 9450   | 860  | 1180  | -680 | C0 |
| ATOM 8833 O ASP C 160     | -58.566 | 19.638 | 34.753 | 1.00 | 73.39 |      | O0 |
| ANISOU 8833 O ASP C 160   | 7930    | 10560  | 9400   | 770  | 1110  | -550 | O0 |
| ATOM 8834 CB ASP C 160    | -60.913 | 19.703 | 36.771 | 1.00 | 78.06 |      | C0 |
| ANISOU 8834 CB ASP C 160  | 8160    | 11650  | 9860   | 860  | 1270  | -770 | C0 |
| ATOM 8835 CG ASP C 160    | -60.283 | 18.978 | 37.953 | 1.00 | 77.20 |      | C0 |
| ANISOU 8835 CG ASP C 160  | 8130    | 11560  | 9650   | 650  | 1320  | -830 | C0 |
| ATOM 8836 OD1 ASP C 160   | -59.315 | 19.514 | 38.534 | 1.00 | 76.16 |      | O0 |
| ANISOU 8836 OD1 ASP C 160 | 8150    | 11240  | 9550   | 670  | 1350  | -890 | O0 |
| ATOM 8837 OD2 ASP C 160   | -60.764 | 17.874 | 38.282 | 1.00 | 76.51 |      | O0 |
| ANISOU 8837 OD2 ASP C 160 | 7950    | 11680  | 9440   | 470  | 1330  | -800 | O0 |
| ATOM 8838 H ASP C 160     | -61.429 | 20.936 | 34.674 | 1.00 | 82.16 |      | H0 |
| ANISOU 8838 H ASP C 160   | 8640    | 12010  | 10560  | 1180 | 1160  | -650 | H0 |
| ATOM 8839 HA ASP C 160    | -59.974 | 21.544 | 36.855 | 1.00 | 78.71 |      | H0 |
| ANISOU 8839 HA ASP C 160  | 8430    | 11370  | 10110  | 1100 | 1290  | -860 | H0 |
| ATOM 8840 HB2 ASP C 160   | -61.769 | 20.075 | 37.065 | 1.00 | 79.59 |      | H0 |
| ANISOU 8840 HB2 ASP C 160 | 8220    | 11980  | 10040  | 970  | 1320  | -840 | H0 |
| ATOM 8841 HB3 ASP C 160   | -61.094 | 19.044 | 36.071 | 1.00 | 77.49 |      | H0 |
| ANISOU 8841 HB3 ASP C 160 | 8050    | 11630  | 9760   | 780  | 1220  | -680 | H0 |
| ATOM 8842 N ASP C 161     | -57.631 | 20.806 | 36.480 | 1.00 | 70.69 |      | N0 |
| ANISOU 8842 N ASP C 161   | 7730    | 10030  | 9100   | 830  | 1210  | -750 | N0 |
| ATOM 8843 CA ASP C 161    | -56.208 | 20.454 | 36.215 | 1.00 | 66.91 |      | C0 |
| ANISOU 8843 CA ASP C 161  | 7430    | 9370   | 8630   | 690  | 1160  | -690 | C0 |
| ATOM 8844 C ASP C 161     | -55.978 | 18.969 | 36.538 | 1.00 | 63.99 |      | C0 |
| ANISOU 8844 C ASP C 161   | 7050    | 9120   | 8140   | 470  | 1140  | -650 | C0 |
| ATOM 8845 O ASP C 161     | -55.054 | 18.376 | 35.942 | 1.00 | 62.43 |      | O0 |
| ANISOU 8845 O ASP C 161   | 6950    | 8830   | 7940   | 370  | 1080  | -580 | O0 |
| ATOM 8846 CB ASP C 161    | -55.257 | 21.349 | 37.014 | 1.00 | 66.26 |      | C0 |
| ANISOU 8846 CB ASP C 161  | 7490    | 9100   | 8590   | 720  | 1210  | -790 | C0 |
| ATOM 8847 CG ASP C 161    | -55.433 | 22.837 | 36.751 | 1.00 | 67.65 |      | C0 |
| ANISOU 8847 CG ASP C 161  | 7710    | 9110   | 8880   | 920  | 1220  | -830 | C0 |
| ATOM 8848 OD1 ASP C 161   | -55.626 | 23.209 | 35.571 | 1.00 | 66.91 |      | O0 |
| ANISOU 8848 OD1 ASP C 161 | 7620    | 8950   | 8850   | 1020 | 1160  | -730 | O0 |
| ATOM 8849 OD2 ASP C 161   | -55.378 | 23.614 | 37.732 | 1.00 | 67.65 |      | O0 |
| ANISOU 8849 OD2 ASP C 161 | 7760    | 9050   | 8890   | 990  | 1280  | -960 | O0 |
| ATOM 8850 H ASP C 161     | -57.741 | 21.347 | 37.205 | 1.00 | 71.62 |      | H0 |
| ANISOU 8850 H ASP C 161   | 7850    | 10140  | 9220   | 890  | 1270  | -840 | H0 |
| ATOM 8851 HA ASP C 161    | -56.031 | 20.595 | 35.255 | 1.00 | 66.46 |      | H0 |
| ANISOU 8851 HA ASP C 161  | 7400    | 9230   | 8620   | 730  | 1110  | -610 | H0 |
| ATOM 8852 HB2 ASP C 161   | -55.396 | 21.187 | 37.969 | 1.00 | 66.72 |      | H0 |
| ANISOU 8852 HB2 ASP C 161 | 7520    | 9230   | 8590   | 680  | 1260  | -870 | H0 |
| ATOM 8853 HB3 ASP C 161   | -54.336 | 21.106 | 36.794 | 1.00 | 65.23 |      | H0 |
| ANISOU 8853 HB3 ASP C 161 | 7450    | 8870   | 8460   | 630  | 1170  | -750 | H0 |

|                           |         |        |        |      |       |      |    |
|---------------------------|---------|--------|--------|------|-------|------|----|
| ATOM 8854 N SER C 162     | -56.788 | 18.407 | 37.444 | 1.00 | 62.09 | N0   |    |
| ANISOU 8854 N SER C 162   | 6700    | 9090   | 7800   | 410  | 1190  | -710 | N0 |
| ATOM 8855 CA SER C 162    | -56.756 | 16.989 | 37.894 | 1.00 | 59.57 | C0   |    |
| ANISOU 8855 CA SER C 162  | 6380    | 8900   | 7360   | 190  | 1170  | -670 | C0 |
| ATOM 8856 C SER C 162     | -57.764 | 16.132 | 37.116 | 1.00 | 57.77 | C0   |    |
| ANISOU 8856 C SER C 162   | 6020    | 8850   | 7070   | 140  | 1130  | -580 | C0 |
| ATOM 8857 O SER C 162     | -57.891 | 14.942 | 37.467 | 1.00 | 56.93 | O0   |    |
| ANISOU 8857 O SER C 162   | 5920    | 8860   | 6860   | -50  | 1100  | -550 | O0 |
| ATOM 8858 CB SER C 162    | -57.027 | 16.892 | 39.380 | 1.00 | 60.57 | C0   |    |
| ANISOU 8858 CB SER C 162  | 6470    | 9150   | 7390   | 120  | 1250  | -780 | C0 |
| ATOM 8859 OG SER C 162    | -55.916 | 17.346 | 40.132 | 1.00 | 60.25 | O0   |    |
| ANISOU 8859 OG SER C 162  | 6580    | 8950   | 7370   | 110  | 1270  | -850 | O0 |
| ATOM 8860 H SER C 162     | -57.434 | 18.879 | 37.877 | 1.00 | 63.47 | H0   |    |
| ANISOU 8860 H SER C 162   | 6800    | 9340   | 7980   | 490  | 1240  | -770 | H0 |
| ATOM 8861 HA SER C 162    | -55.845 | 16.631 | 37.718 | 1.00 | 58.34 | H0   |    |
| ANISOU 8861 HA SER C 162  | 6330    | 8630   | 7210   | 120  | 1130  | -640 | H0 |
| ATOM 8862 HB2 SER C 162   | -57.818 | 17.433 | 39.605 | 1.00 | 61.83 | H0   |    |
| ANISOU 8862 HB2 SER C 162 | 6530    | 9410   | 7550   | 220  | 1310  | -840 | H0 |
| ATOM 8863 HB3 SER C 162   | -57.220 | 15.957 | 39.619 | 1.00 | 60.37 | H0   |    |
| ANISOU 8863 HB3 SER C 162 | 6430    | 9230   | 7270   | -20  | 1230  | -750 | H0 |
| ATOM 8864 N GLU C 163     | -58.451 | 16.691 | 36.110 | 1.00 | 56.83 | N0   |    |
| ANISOU 8864 N GLU C 163   | 5810    | 8760   | 7030   | 280  | 1110  | -540 | N0 |
| ATOM 8865 CA GLU C 163    | -59.575 | 16.014 | 35.404 | 1.00 | 56.21 | C0   |    |
| ANISOU 8865 CA GLU C 163  | 5580    | 8880   | 6900   | 240  | 1070  | -460 | C0 |
| ATOM 8866 C GLU C 163     | -59.159 | 14.584 | 35.035 | 1.00 | 52.48 | C0   |    |
| ANISOU 8866 C GLU C 163   | 5180    | 8420   | 6340   | 30   | 990   | -370 | C0 |
| ATOM 8867 O GLU C 163     | -59.898 | 13.651 | 35.380 | 1.00 | 52.89 | O0   |    |
| ANISOU 8867 O GLU C 163   | 5160    | 8660   | 6280   | -130 | 990   | -360 | O0 |
| ATOM 8868 CB GLU C 163    | -60.024 | 16.792 | 34.162 | 1.00 | 57.64 | C0   |    |
| ANISOU 8868 CB GLU C 163  | 5700    | 9030   | 7180   | 430  | 1030  | -400 | C0 |
| ATOM 8869 CG GLU C 163    | -61.200 | 16.136 | 33.451 | 1.00 | 59.67 | C0   |    |
| ANISOU 8869 CG GLU C 163  | 5780    | 9510   | 7370   | 390  | 990   | -330 | C0 |
| ATOM 8870 CD GLU C 163    | -62.120 | 17.043 | 32.645 | 1.00 | 61.82 | C0   |    |
| ANISOU 8870 CD GLU C 163  | 5920    | 9850   | 7720   | 600  | 970   | -310 | C0 |
| ATOM 8871 OE1 GLU C 163   | -63.295 | 17.200 | 33.056 | 1.00 | 63.79 | O0   |    |
| ANISOU 8871 OE1 GLU C 163 | 5970    | 10340  | 7930   | 670  | 1010  | -370 | O0 |
| ATOM 8872 OE2 GLU C 163   | -61.677 | 17.561 | 31.594 | 1.00 | 60.94 | O0   |    |
| ANISOU 8872 OE2 GLU C 163 | 5890    | 9570   | 7690   | 710  | 910   | -240 | O0 |
| ATOM 8873 H GLU C 163     | -58.267 | 17.521 | 35.789 | 1.00 | 57.16 | H0   |    |
| ANISOU 8873 H GLU C 163   | 5880    | 8690   | 7150   | 410  | 1110  | -550 | H0 |
| ATOM 8874 HA GLU C 163    | -60.336 | 15.962 | 36.028 | 1.00 | 57.20 | H0   |    |
| ANISOU 8874 HA GLU C 163  | 5590    | 9180   | 6960   | 230  | 1120  | -510 | H0 |
| ATOM 8875 HB2 GLU C 163   | -60.277 | 17.698 | 34.430 | 1.00 | 58.75 | H0   |    |
| ANISOU 8875 HB2 GLU C 163 | 5800    | 9150   | 7370   | 580  | 1070  | -470 | H0 |
| ATOM 8876 HB3 GLU C 163   | -59.269 | 16.858 | 33.540 | 1.00 | 56.75 | H0   |    |
| ANISOU 8876 HB3 GLU C 163 | 5690    | 8760   | 7110   | 430  | 980   | -350 | H0 |
| ATOM 8877 HG2 GLU C 163   | -60.850 | 15.452 | 32.846 | 1.00 | 58.53 | H0   |    |
| ANISOU 8877 HG2 GLU C 163 | 5700    | 9330   | 7210   | 280  | 930   | -260 | H0 |
| ATOM 8878 HG3 GLU C 163   | -61.747 | 15.673 | 34.122 | 1.00 | 60.13 | H0   |    |
| ANISOU 8878 HG3 GLU C 163 | 5760    | 9740   | 7350   | 300  | 1020  | -370 | H0 |
| ATOM 8879 N TYR C 164     | -58.007 | 14.416 | 34.382 | 1.00 | 48.91 | N0   |    |
| ANISOU 8879 N TYR C 164   | 4890    | 7760   | 5930   | 0    | 930   | -320 | N0 |
| ATOM 8880 CA TYR C 164    | -57.522 | 13.104 | 33.874 | 1.00 | 46.68 | C0   |    |
| ANISOU 8880 CA TYR C 164  | 4700    | 7450   | 5580   | -170 | 840   | -240 | C0 |

|                           |         |        |        |      |       |      |    |
|---------------------------|---------|--------|--------|------|-------|------|----|
| ATOM 8881 C TYR C 164     | -56.347 | 12.602 | 34.724 | 1.00 | 43.91 | C0   |    |
| ANISOU 8881 C TYR C 164   | 4510    | 6980   | 5200   | -270 | 830   | -280 | C0 |
| ATOM 8882 O TYR C 164     | -55.712 | 11.606 | 34.338 | 1.00 | 42.63 | O0   |    |
| ANISOU 8882 O TYR C 164   | 4450    | 6750   | 5000   | -380 | 750   | -230 | O0 |
| ATOM 8883 CB TYR C 164    | -57.157 | 13.216 | 32.393 | 1.00 | 46.00 | C0   |    |
| ANISOU 8883 CB TYR C 164  | 4650    | 7260   | 5560   | -100 | 770   | -160 | C0 |
| ATOM 8884 CG TYR C 164    | -58.250 | 13.783 | 31.526 | 1.00 | 46.97 | C0   |    |
| ANISOU 8884 CG TYR C 164  | 4630    | 7490   | 5720   | 20   | 760   | -110 | C0 |
| ATOM 8885 CD1 TYR C 164   | -59.528 | 13.251 | 31.552 | 1.00 | 48.61 | C0   |    |
| ANISOU 8885 CD1 TYR C 164 | 4680    | 7930   | 5850   | -40  | 760   | -90  | C0 |
| ATOM 8886 CD2 TYR C 164   | -58.009 | 14.851 | 30.678 | 1.00 | 47.64 | C0   |    |
| ANISOU 8886 CD2 TYR C 164 | 4730    | 7460   | 5910   | 190  | 760   | -80  | C0 |
| ATOM 8887 CE1 TYR C 164   | -60.542 | 13.765 | 30.760 | 1.00 | 50.05 | C0   |    |
| ANISOU 8887 CE1 TYR C 164 | 4720    | 8230   | 6070   | 80   | 750   | -60  | C0 |
| ATOM 8888 CE2 TYR C 164   | -59.008 | 15.375 | 29.874 | 1.00 | 49.10 | C0   |    |
| ANISOU 8888 CE2 TYR C 164 | 4790    | 7740   | 6130   | 310  | 740   | -40  | C0 |
| ATOM 8889 CZ TYR C 164    | -60.281 | 14.833 | 29.917 | 1.00 | 50.13 | C0   |    |
| ANISOU 8889 CZ TYR C 164  | 4750    | 8110   | 6190   | 260  | 730   | -30  | C0 |
| ATOM 8890 OH TYR C 164    | -61.274 | 15.352 | 29.138 | 1.00 | 51.44 | O0   |    |
| ANISOU 8890 OH TYR C 164  | 4780    | 8390   | 6380   | 390  | 700   | 20   | O0 |
| ATOM 8891 H TYR C 164     | -57.431 | 15.097 | 34.197 | 1.00 | 48.82 | H0   |    |
| ANISOU 8891 H TYR C 164   | 4940    | 7610   | 6000   | 90   | 930   | -330 | H0 |
| ATOM 8892 HA TYR C 164    | -58.259 | 12.447 | 33.960 | 1.00 | 47.09 | H0   |    |
| ANISOU 8892 HA TYR C 164  | 4680    | 7650   | 5560   | -260 | 830   | -220 | H0 |
| ATOM 8893 HB2 TYR C 164   | -56.361 | 13.782 | 32.312 | 1.00 | 45.44 | H0   |    |
| ANISOU 8893 HB2 TYR C 164 | 4660    | 7050   | 5560   | -40  | 780   | -170 | H0 |
| ATOM 8894 HB3 TYR C 164   | -56.923 | 12.323 | 32.063 | 1.00 | 45.37 | H0   |    |
| ANISOU 8894 HB3 TYR C 164 | 4630    | 7180   | 5430   | -210 | 710   | -120 | H0 |
| ATOM 8895 HD1 TYR C 164   | -59.715 | 12.527 | 32.125 | 1.00 | 48.64 | H0   |    |
| ANISOU 8895 HD1 TYR C 164 | 4680    | 8020   | 5780   | -170 | 770   | -110 | H0 |
| ATOM 8896 HD2 TYR C 164   | -57.144 | 15.226 | 30.642 | 1.00 | 46.94 | H0   |    |
| ANISOU 8896 HD2 TYR C 164 | 4740    | 7220   | 5870   | 210  | 760   | -90  | H0 |
| ATOM 8897 HE1 TYR C 164   | -61.408 | 13.392 | 30.795 | 1.00 | 50.82 | H0   |    |
| ANISOU 8897 HE1 TYR C 164 | 4700    | 8500   | 6110   | 30   | 740   | -50  | H0 |
| ATOM 8898 HE2 TYR C 164   | -58.826 | 16.105 | 29.305 | 1.00 | 49.14 | H0   |    |
| ANISOU 8898 HE2 TYR C 164 | 4820    | 7650   | 6200   | 420  | 720   | -10  | H0 |
| ATOM 8899 N PHE C 165     | -56.077 | 13.246 | 35.860 | 1.00 | 42.69 | N0   |    |
| ANISOU 8899 N PHE C 165   | 4370    | 6800   | 5050   | -240 | 910   | -370 | N0 |
| ATOM 8900 CA PHE C 165    | -54.955 | 12.868 | 36.754 | 1.00 | 40.97 | C0   |    |
| ANISOU 8900 CA PHE C 165  | 4300    | 6470   | 4800   | -330 | 900   | -410 | C0 |
| ATOM 8901 C PHE C 165     | -55.339 | 11.621 | 37.553 | 1.00 | 40.35 | C0   |    |
| ANISOU 8901 C PHE C 165   | 4230    | 6520   | 4580   | -520 | 870   | -400 | C0 |
| ATOM 8902 O PHE C 165     | -56.441 | 11.591 | 38.122 | 1.00 | 42.10 | O0   |    |
| ANISOU 8902 O PHE C 165   | 4340    | 6930   | 4730   | -570 | 930   | -420 | O0 |
| ATOM 8903 CB PHE C 165    | -54.555 | 14.002 | 37.697 | 1.00 | 41.00 | C0   |    |
| ANISOU 8903 CB PHE C 165  | 4320    | 6410   | 4850   | -240 | 980   | -520 | C0 |
| ATOM 8904 CG PHE C 165    | -53.283 | 13.681 | 38.432 | 1.00 | 39.77 | C0   |    |
| ANISOU 8904 CG PHE C 165  | 4310    | 6130   | 4670   | -320 | 950   | -550 | C0 |
| ATOM 8905 CD1 PHE C 165   | -52.074 | 13.659 | 37.755 | 1.00 | 38.11 | C0   |    |
| ANISOU 8905 CD1 PHE C 165 | 4200    | 5760   | 4520   | -300 | 890   | -520 | C0 |
| ATOM 8906 CD2 PHE C 165   | -53.307 | 13.315 | 39.770 | 1.00 | 39.91 | C0   |    |
| ANISOU 8906 CD2 PHE C 165 | 4350    | 6220   | 4590   | -430 | 980   | -610 | C0 |
| ATOM 8907 CE1 PHE C 165   | -50.902 | 13.332 | 38.418 | 1.00 | 37.37 | C0   |    |
| ANISOU 8907 CE1 PHE C 165 | 4230    | 5570   | 4400   | -370 | 860   | -550 | C0 |

|                           |         |        |        |       |       |      |    |
|---------------------------|---------|--------|--------|-------|-------|------|----|
| ATOM 8908 CE2 PHE C 165   | -52.133 | 12.993 | 40.430 | 1.00  | 39.13 | C0   |    |
| ANISOU 8908 CE2 PHE C 165 | 4390    | 6020   | 4460   | -500  | 940   | -630 | C0 |
| ATOM 8909 CZ PHE C 165    | -50.934 | 13.005 | 39.754 | 1.00  | 37.89 | C0   |    |
| ANISOU 8909 CZ PHE C 165  | 4320    | 5700   | 4380   | -460  | 880   | -610 | C0 |
| ATOM 8910 H PHE C 165     | -56.556 | 13.950 | 36.174 | 1.00  | 43.68 | H0   |    |
| ANISOU 8910 H PHE C 165   | 4420    | 6970   | 5200   | -150  | 960   | -420 | H0 |
| ATOM 8911 HA PHE C 165    | -54.172 | 12.644 | 36.189 | 1.00  | 39.99 | H0   |    |
| ANISOU 8911 HA PHE C 165  | 4260    | 6230   | 4710   | -330  | 840   | -380 | H0 |
| ATOM 8912 HB2 PHE C 165   | -54.432 | 14.822 | 37.175 | 1.00  | 41.06 | H0   |    |
| ANISOU 8912 HB2 PHE C 165 | 4320    | 6340   | 4950   | -120  | 990   | -520 | H0 |
| ATOM 8913 HB3 PHE C 165   | -55.277 | 14.151 | 38.342 | 1.00  | 41.94 | H0   |    |
| ANISOU 8913 HB3 PHE C 165 | 4360    | 6640   | 4930   | -240  | 1030  | -560 | H0 |
| ATOM 8914 HD1 PHE C 165   | -52.047 | 13.889 | 36.840 | 1.00  | 37.96 | H0   |    |
| ANISOU 8914 HD1 PHE C 165 | 4170    | 5690   | 4560   | -240  | 870   | -480 | H0 |
| ATOM 8915 HD2 PHE C 165   | -54.126 | 13.314 | 40.240 | 1.00  | 40.84 | H0   |    |
| ANISOU 8915 HD2 PHE C 165 | 4390    | 6470   | 4660   | -450  | 1030  | -630 | H0 |
| ATOM 8916 HE1 PHE C 165   | -50.082 | 13.342 | 37.954 | 1.00  | 36.78 | H0   |    |
| ANISOU 8916 HE1 PHE C 165 | 4210    | 5400   | 4360   | -350  | 820   | -540 | H0 |
| ATOM 8917 HE2 PHE C 165   | -52.156 | 12.768 | 41.345 | 1.00  | 39.53 | H0   |    |
| ANISOU 8917 HE2 PHE C 165 | 4460    | 6120   | 4440   | -570  | 960   | -670 | H0 |
| ATOM 8918 HZ PHE C 165    | -50.135 | 12.782 | 40.204 | 1.00  | 37.57 | H0   |    |
| ANISOU 8918 HZ PHE C 165  | 4360    | 5600   | 4320   | -510  | 850   | -630 | H0 |
| ATOM 8919 N SER C 166     | -54.443 | 10.633 | 37.578 | 1.00  | 38.74 | N0   |    |
| ANISOU 8919 N SER C 166   | 4170    | 6210   | 4330   | -630  | 790   | -360 | N0 |
| ATOM 8920 CA SER C 166    | -54.647 | 9.299  | 38.197 | 1.00  | 38.98 | C0   |    |
| ANISOU 8920 CA SER C 166  | 4270    | 6310   | 4230   | -830  | 730   | -330 | C0 |
| ATOM 8921 C SER C 166     | -54.914 | 9.457  | 39.698 | 1.00  | 39.70 | C0   |    |
| ANISOU 8921 C SER C 166   | 4350    | 6500   | 4230   | -910  | 800   | -400 | C0 |
| ATOM 8922 O SER C 166     | -54.128 | 10.157 | 40.366 | 1.00  | 38.45 | O0   |    |
| ANISOU 8922 O SER C 166   | 4240    | 6260   | 4110   | -840  | 840   | -470 | O0 |
| ATOM 8923 CB SER C 166    | -53.455 | 8.413  | 37.950 | 1.00  | 38.05 | C0   |    |
| ANISOU 8923 CB SER C 166  | 4330    | 6030   | 4100   | -880  | 620   | -300 | C0 |
| ATOM 8924 OG SER C 166    | -53.592 | 7.182  | 38.645 | 1.00  | 38.45 | O0   |    |
| ANISOU 8924 OG SER C 166  | 4470    | 6120   | 4020   | -1070 | 560   | -260 | O0 |
| ATOM 8925 H SER C 166     | -53.616 | 10.712 | 37.205 | 1.00  | 38.12 | H0   |    |
| ANISOU 8925 H SER C 166   | 4170    | 6010   | 4300   | -590  | 750   | -360 | H0 |
| ATOM 8926 HA SER C 166    | -55.446 | 8.882  | 37.777 | 1.00  | 39.47 | H0   |    |
| ANISOU 8926 HA SER C 166  | 4270    | 6480   | 4250   | -890  | 720   | -280 | H0 |
| ATOM 8927 HB2 SER C 166   | -53.372 | 8.238  | 36.986 | 1.00  | 37.57 | H0   |    |
| ANISOU 8927 HB2 SER C 166 | 4270    | 5930   | 4080   | -850  | 580   | -260 | H0 |
| ATOM 8928 HB3 SER C 166   | -52.638 | 8.871  | 38.251 | 1.00  | 37.55 | H0   |    |
| ANISOU 8928 HB3 SER C 166 | 4310    | 5870   | 4080   | -820  | 630   | -340 | H0 |
| ATOM 8929 N GLN C 167     | -55.967 | 8.810  | 40.203 | 1.00  | 41.25 | N0   |    |
| ANISOU 8929 N GLN C 167   | 4480    | 6890   | 4300   | -1060 | 820   | -370 | N0 |
| ATOM 8930 CA GLN C 167    | -56.318 | 8.804  | 41.649 | 1.00  | 43.18 | C0   |    |
| ANISOU 8930 CA GLN C 167  | 4710    | 7260   | 4430   | -1160 | 890   | -430 | C0 |
| ATOM 8931 C GLN C 167     | -55.354 | 7.876  | 42.410 | 1.00  | 41.99 | C0   |    |
| ANISOU 8931 C GLN C 167   | 4760    | 7000   | 4200   | -1310 | 800   | -410 | C0 |
| ATOM 8932 O GLN C 167     | -55.365 | 7.923  | 43.653 | 1.00  | 42.81 | O0   |    |
| ANISOU 8932 O GLN C 167   | 4880    | 7170   | 4210   | -1390 | 850   | -460 | O0 |
| ATOM 8933 CB GLN C 167    | -57.789 | 8.419  | 41.847 | 1.00  | 45.46 | C0   |    |
| ANISOU 8933 CB GLN C 167  | 4850    | 7820   | 4610   | -1290 | 940   | -410 | C0 |
| ATOM 8934 CG GLN C 167    | -58.089 | 6.945  | 41.615 | 1.00  | 46.51 | C0   |    |
| ANISOU 8934 CG GLN C 167  | 5060    | 7980   | 4620   | -1520 | 830   | -300 | C0 |



|                            |         |       |        |       |       |      |    |
|----------------------------|---------|-------|--------|-------|-------|------|----|
| ATOM 8935 CD GLN C 167     | -59.567 | 6.643 | 41.662 | 1.00  | 49.25 | C0   |    |
| ANISOU 8935 CD GLN C 167   | 5240    | 8610  | 4860   | -1650 | 880   | -280 | C0 |
| ATOM 8936 OE1 GLN C 167    | -60.227 | 6.504 | 40.632 | 1.00  | 51.19 | O0   |    |
| ANISOU 8936 OE1 GLN C 167  | 5380    | 8930  | 5140   | -1630 | 850   | -230 | O0 |
| ATOM 8937 NE2 GLN C 167    | -60.102 | 6.536 | 42.866 | 1.00  | 50.68 | N0   |    |
| ANISOU 8937 NE2 GLN C 167  | 5370    | 8980  | 4910   | -1790 | 950   | -320 | N0 |
| ATOM 8938 H GLN C 167      | -56.541 | 8.330 | 39.684 | 1.00  | 41.62 | H0   |    |
| ANISOU 8938 H GLN C 167    | 4490    | 7000  | 4320   | -1110 | 790   | -320 | H0 |
| ATOM 8939 HA GLN C 167     | -56.193 | 9.719 | 41.991 | 1.00  | 43.14 | H0   |    |
| ANISOU 8939 HA GLN C 167   | 4660    | 7250  | 4480   | -1050 | 960   | -500 | H0 |
| ATOM 8940 HB2 GLN C 167    | -58.050 | 8.657 | 42.761 | 1.00  | 46.32 | H0   |    |
| ANISOU 8940 HB2 GLN C 167  | 4920    | 8030  | 4650   | -1330 | 1000  | -470 | H0 |
| ATOM 8941 HB3 GLN C 167    | -58.334 | 8.955 | 41.233 | 1.00  | 45.72 | H0   |    |
| ANISOU 8941 HB3 GLN C 167  | 4750    | 7910  | 4710   | -1180 | 970   | -420 | H0 |
| ATOM 8942 HG2 GLN C 167    | -57.735 | 6.676 | 40.740 | 1.00  | 45.74 | H0   |    |
| ANISOU 8942 HG2 GLN C 167  | 5020    | 7770  | 4590   | -1480 | 760   | -260 | H0 |
| ATOM 8943 HG3 GLN C 167    | -57.633 | 6.410 | 42.299 | 1.00  | 46.56 | H0   |    |
| ANISOU 8943 HG3 GLN C 167  | 5190    | 7940  | 4560   | -1630 | 790   | -290 | H0 |
| ATOM 8944 HE21 GLN C 167   | -60.930 | 6.239 | 42.957 | 1.00  | 51.75 | H0   |    |
| ANISOU 8944 HE21 GLN C 167 | 5410    | 9290  | 4960   | -1900 | 970   | -300 | H0 |
| ATOM 8945 HE22 GLN C 167   | -59.633 | 6.762 | 43.581 | 1.00  | 50.58 | H0   |    |
| ANISOU 8945 HE22 GLN C 167 | 5420    | 8920  | 4880   | -1780 | 980   | -360 | H0 |
| ATOM 8946 N TYR C 168      | -54.532 | 7.098 | 41.692 | 1.00  | 39.82 | N0   |    |
| ANISOU 8946 N TYR C 168    | 4620    | 6550  | 3950   | -1320 | 680   | -340 | N0 |
| ATOM 8947 CA TYR C 168     | -53.674 | 6.018 | 42.247 | 1.00  | 38.85 | C0   |    |
| ANISOU 8947 CA TYR C 168   | 4700    | 6310  | 3750   | -1440 | 560   | -300 | C0 |
| ATOM 8948 C TYR C 168      | -52.215 | 6.473 | 42.349 | 1.00  | 37.21 | C0   |    |
| ANISOU 8948 C TYR C 168    | 4590    | 5920  | 3630   | -1320 | 530   | -350 | C0 |
| ATOM 8949 O TYR C 168      | -51.409 | 5.715 | 42.920 | 1.00  | 37.26 | O0   |    |
| ANISOU 8949 O TYR C 168    | 4760    | 5830  | 3570   | -1390 | 440   | -340 | O0 |
| ATOM 8950 CB TYR C 168     | -53.832 | 4.750 | 41.407 | 1.00  | 38.54 | C0   |    |
| ANISOU 8950 CB TYR C 168   | 4760    | 6220  | 3660   | -1550 | 440   | -210 | C0 |
| ATOM 8951 CG TYR C 168     | -55.251 | 4.256 | 41.357 | 1.00  | 39.60 | C0   |    |
| ANISOU 8951 CG TYR C 168   | 4800    | 6550  | 3690   | -1710 | 460   | -150 | C0 |
| ATOM 8952 CD1 TYR C 168    | -55.945 | 3.985 | 42.526 | 1.00  | 40.99 | C0   |    |
| ANISOU 8952 CD1 TYR C 168  | 4960    | 6890  | 3720   | -1890 | 510   | -150 | C0 |
| ATOM 8953 CD2 TYR C 168    | -55.913 | 4.082 | 40.149 | 1.00  | 39.58 | C0   |    |
| ANISOU 8953 CD2 TYR C 168  | 4720    | 6590  | 3730   | -1690 | 440   | -110 | C0 |
| ATOM 8954 CE1 TYR C 168    | -57.257 | 3.544 | 42.498 | 1.00  | 42.29 | C0   |    |
| ANISOU 8954 CE1 TYR C 168  | 5020    | 7270  | 3780   | -2050 | 540   | -110 | C0 |
| ATOM 8955 CE2 TYR C 168    | -57.227 | 3.649 | 40.105 | 1.00  | 40.54 | C0   |    |
| ANISOU 8955 CE2 TYR C 168  | 4730    | 6920  | 3750   | -1850 | 460   | -60  | C0 |
| ATOM 8956 CZ TYR C 168     | -57.900 | 3.383 | 41.284 | 1.00  | 41.88 | C0   |    |
| ANISOU 8956 CZ TYR C 168   | 4880    | 7260  | 3780   | -2030 | 510   | -60  | C0 |
| ATOM 8957 OH TYR C 168     | -59.191 | 2.946 | 41.258 | 1.00  | 43.87 | O0   |    |
| ANISOU 8957 OH TYR C 168   | 5020    | 7740  | 3920   | -2210 | 530   | -20  | O0 |
| ATOM 8958 H TYR C 168      | -54.451 | 7.163 | 40.790 | 1.00  | 39.33 | H0   |    |
| ANISOU 8958 H TYR C 168    | 4550    | 6440  | 3960   | -1250 | 650   | -320 | H0 |
| ATOM 8959 HA TYR C 168     | -53.988 | 5.818 | 43.164 | 1.00  | 39.68 | H0   |    |
| ANISOU 8959 HA TYR C 168   | 4820    | 6500  | 3750   | -1560 | 590   | -310 | H0 |
| ATOM 8960 HB2 TYR C 168    | -53.522 | 4.935 | 40.496 | 1.00  | 37.78 | H0   |    |
| ANISOU 8960 HB2 TYR C 168  | 4650    | 6050  | 3660   | -1440 | 420   | -200 | H0 |
| ATOM 8961 HB3 TYR C 168    | -53.261 | 4.049 | 41.785 | 1.00  | 38.53 | H0   |    |
| ANISOU 8961 HB3 TYR C 168  | 4900    | 6130  | 3610   | -1620 | 360   | -180 | H0 |

|                           |         |        |        |       |       |      |    |
|---------------------------|---------|--------|--------|-------|-------|------|----|
| ATOM 8962 HD1 TYR C 168   | -55.514 | 4.099  | 43.357 | 1.00  | 41.08 |      | H0 |
| ANISOU 8962 HD1 TYR C 168 | 5030    | 6880   | 3700   | -1910 | 520   | -180 | H0 |
| ATOM 8963 HD2 TYR C 168   | -55.462 | 4.270  | 39.343 | 1.00  | 38.64 |      | H0 |
| ANISOU 8963 HD2 TYR C 168 | 4610    | 6380   | 3700   | -1580 | 420   | -110 | H0 |
| ATOM 8964 HE1 TYR C 168   | -57.715 | 3.363  | 43.302 | 1.00  | 43.26 |      | H0 |
| ANISOU 8964 HE1 TYR C 168 | 5130    | 7510   | 3800   | -2190 | 570   | -110 | H0 |
| ATOM 8965 HE2 TYR C 168   | -57.662 | 3.534  | 39.276 | 1.00  | 40.63 |      | H0 |
| ANISOU 8965 HE2 TYR C 168 | 4690    | 6960   | 3790   | -1840 | 440   | -30  | H0 |
| ATOM 8966 N SER C 169     | -51.891 | 7.670  | 41.852 | 1.00  | 36.06 |      | N0 |
| ANISOU 8966 N SER C 169   | 4360    | 5730   | 3620   | -1140 | 610   | -410 | N0 |
| ATOM 8967 CA SER C 169    | -50.607 | 8.362  | 42.138 | 1.00  | 35.21 |      | C0 |
| ANISOU 8967 CA SER C 169  | 4310    | 5480   | 3590   | -1030 | 610   | -480 | C0 |
| ATOM 8968 C SER C 169     | -50.454 | 8.534  | 43.659 | 1.00  | 36.58 |      | C0 |
| ANISOU 8968 C SER C 169   | 4520    | 5710   | 3670   | -1110 | 650   | -540 | C0 |
| ATOM 8969 O SER C 169     | -51.478 | 8.722  | 44.340 | 1.00  | 36.46 |      | O0 |
| ANISOU 8969 O SER C 169   | 4430    | 5850   | 3580   | -1180 | 730   | -560 | O0 |
| ATOM 8970 CB SER C 169    | -50.526 | 9.686  | 41.421 | 1.00  | 34.30 |      | C0 |
| ANISOU 8970 CB SER C 169  | 4090    | 5330   | 3610   | -860  | 690   | -530 | C0 |
| ATOM 8971 OG SER C 169    | -49.271 | 10.316 | 41.647 | 1.00  | 33.32 |      | O0 |
| ANISOU 8971 OG SER C 169  | 4030    | 5080   | 3550   | -780  | 690   | -580 | O0 |
| ATOM 8972 H SER C 169     | -52.426 | 8.147  | 41.292 | 1.00  | 36.21 |      | H0 |
| ANISOU 8972 H SER C 169   | 4280    | 5790   | 3690   | -1070 | 650   | -410 | H0 |
| ATOM 8973 HA SER C 169    | -49.867 | 7.783  | 41.815 | 1.00  | 34.73 |      | H0 |
| ANISOU 8973 HA SER C 169  | 4340    | 5320   | 3530   | -1030 | 520   | -450 | H0 |
| ATOM 8974 HB2 SER C 169   | -50.655 | 9.544  | 40.458 | 1.00  | 33.93 |      | H0 |
| ANISOU 8974 HB2 SER C 169 | 4020    | 5260   | 3610   | -820  | 660   | -480 | H0 |
| ATOM 8975 HB3 SER C 169   | -51.248 | 10.273 | 41.741 | 1.00  | 34.99 |      | H0 |
| ANISOU 8975 HB3 SER C 169 | 4090    | 5510   | 3700   | -840  | 770   | -560 | H0 |
| ATOM 8976 N ARG C 170     | -49.221 | 8.470  | 44.172 | 1.00  | 36.99 |      | N0 |
| ANISOU 8976 N ARG C 170   | 4690    | 5650   | 3720   | -1100 | 590   | -570 | N0 |
| ATOM 8977 CA ARG C 170    | -48.907 | 8.811  | 45.586 | 1.00  | 38.79 |      | C0 |
| ANISOU 8977 CA ARG C 170  | 4950    | 5910   | 3880   | -1150 | 620   | -640 | C0 |
| ATOM 8978 C ARG C 170     | -48.985 | 10.333 | 45.758 | 1.00  | 39.16 |      | C0 |
| ANISOU 8978 C ARG C 170   | 4900    | 5970   | 4010   | -1030 | 750   | -740 | C0 |
| ATOM 8979 O ARG C 170     | -48.906 | 10.796 | 46.907 | 1.00  | 40.17 |      | O0 |
| ANISOU 8979 O ARG C 170   | 5040    | 6150   | 4080   | -1070 | 810   | -820 | O0 |
| ATOM 8980 CB ARG C 170    | -47.514 | 8.325  | 45.995 | 1.00  | 38.86 |      | C0 |
| ANISOU 8980 CB ARG C 170  | 5100    | 5790   | 3870   | -1160 | 510   | -640 | C0 |
| ATOM 8981 CG ARG C 170    | -47.376 | 6.816  | 46.116 | 1.00  | 39.86 |      | C0 |
| ANISOU 8981 CG ARG C 170  | 5370    | 5890   | 3890   | -1280 | 360   | -550 | C0 |
| ATOM 8982 CD ARG C 170    | -45.921 | 6.424  | 46.314 | 1.00  | 40.20 |      | C0 |
| ANISOU 8982 CD ARG C 170  | 5530    | 5800   | 3950   | -1240 | 240   | -560 | C0 |
| ATOM 8983 NE ARG C 170    | -45.124 | 6.671  | 45.115 | 1.00  | 40.25 |      | N0 |
| ANISOU 8983 NE ARG C 170  | 5500    | 5700   | 4090   | -1090 | 210   | -570 | N0 |
| ATOM 8984 CZ ARG C 170    | -43.846 | 6.324  | 44.954 | 1.00  | 40.70 |      | C0 |
| ANISOU 8984 CZ ARG C 170  | 5630    | 5660   | 4180   | -1020 | 110   | -590 | C0 |
| ATOM 8985 NH1 ARG C 170   | -43.191 | 5.700  | 45.922 | 1.00  | 41.62 |      | N0 |
| ANISOU 8985 NH1 ARG C 170 | 5860    | 5750   | 4210   | -1070 | 10    | -580 | N0 |
| ATOM 8986 NH2 ARG C 170   | -43.229 | 6.595  | 43.815 | 1.00  | 39.71 |      | N0 |
| ANISOU 8986 NH2 ARG C 170 | 5450    | 5480   | 4160   | -900  | 100   | -600 | N0 |
| ATOM 8987 H ARG C 170     | -48.497 | 8.212  | 43.682 | 1.00  | 36.41 |      | H0 |
| ANISOU 8987 H ARG C 170   | 4660    | 5470   | 3690   | -1060 | 520   | -550 | H0 |
| ATOM 8988 HA ARG C 170    | -49.579 | 8.388  | 46.169 | 1.00  | 39.49 |      | H0 |
| ANISOU 8988 HA ARG C 170  | 5040    | 6100   | 3860   | -1260 | 640   | -620 | H0 |

|                            |         |        |        |       |       |      |    |
|----------------------------|---------|--------|--------|-------|-------|------|----|
| ATOM 8989 HB2 ARG C 170    | -46.869 | 8.649  | 45.333 | 1.00  | 38.21 |      | H0 |
| ANISOU 8989 HB2 ARG C 170  | 5010    | 5630   | 3880   | -1070 | 490   | -650 | H0 |
| ATOM 8990 HB3 ARG C 170    | -47.284 | 8.730  | 46.857 | 1.00  | 39.37 |      | H0 |
| ANISOU 8990 HB3 ARG C 170  | 5180    | 5880   | 3900   | -1190 | 540   | -690 | H0 |
| ATOM 8991 HG2 ARG C 170    | -47.904 | 6.497  | 46.879 | 1.00  | 40.66 |      | H0 |
| ANISOU 8991 HG2 ARG C 170  | 5500    | 6070   | 3890   | -1400 | 370   | -540 | H0 |
| ATOM 8992 HG3 ARG C 170    | -47.720 | 6.387  | 45.304 | 1.00  | 39.57 |      | H0 |
| ANISOU 8992 HG3 ARG C 170  | 5320    | 5830   | 3880   | -1270 | 340   | -500 | H0 |
| ATOM 8993 HD2 ARG C 170    | -45.548 | 6.937  | 47.062 | 1.00  | 40.57 |      | H0 |
| ANISOU 8993 HD2 ARG C 170  | 5580    | 5860   | 3980   | -1240 | 270   | -610 | H0 |
| ATOM 8994 HD3 ARG C 170    | -45.872 | 5.472  | 46.546 | 1.00  | 40.67 |      | H0 |
| ANISOU 8994 HD3 ARG C 170  | 5690    | 5830   | 3930   | -1310 | 150   | -510 | H0 |
| ATOM 8995 HE ARG C 170     | -45.514 | 7.074  | 44.448 | 1.00  | 39.87 |      | H0 |
| ANISOU 8995 HE ARG C 170   | 5380    | 5670   | 4100   | -1040 | 270   | -570 | H0 |
| ATOM 8996 HH11 ARG C 170   | -43.593 | 5.515  | 46.680 | 1.00  | 42.06 |      | H0 |
| ANISOU 8996 HH11 ARG C 170 | 5950    | 5850   | 4180   | -1170 | 10    | -570 | H0 |
| ATOM 8997 HH12 ARG C 170   | -42.349 | 5.476  | 45.805 | 1.00  | 41.31 |      | H0 |
| ANISOU 8997 HH12 ARG C 170 | 5850    | 5650   | 4190   | -1020 | -70   | -600 | H0 |
| ATOM 8998 HH21 ARG C 170   | -43.661 | 7.009  | 43.168 | 1.00  | 39.40 |      | H0 |
| ANISOU 8998 HH21 ARG C 170 | 5340    | 5450   | 4180   | -860  | 160   | -600 | H0 |
| ATOM 8999 HH22 ARG C 170   | -42.385 | 6.367  | 43.708 | 1.00  | 39.60 |      | H0 |
| ANISOU 8999 HH22 ARG C 170 | 5470    | 5410   | 4170   | -850  | 40    | -620 | H0 |
| ATOM 9000 N PHE C 171      | -49.112 | 11.078 | 44.654 | 1.00  | 38.43 |      | N0 |
| ANISOU 9000 N PHE C 171    | 4720    | 5830   | 4050   | -900  | 800   | -750 | N0 |
| ATOM 9001 CA PHE C 171     | -49.139 | 12.562 | 44.630 | 1.00  | 38.37 |      | C0 |
| ANISOU 9001 CA PHE C 171   | 4640    | 5790   | 4140   | -770  | 900   | -840 | C0 |
| ATOM 9002 C PHE C 171      | -50.511 | 13.043 | 44.157 | 1.00  | 39.15 |      | C0 |
| ANISOU 9002 C PHE C 171    | 4600    | 6000   | 4270   | -700  | 990   | -840 | C0 |
| ATOM 9003 O PHE C 171      | -51.287 | 12.231 | 43.617 | 1.00  | 38.85 |      | O0 |
| ANISOU 9003 O PHE C 171    | 4520    | 6050   | 4190   | -750  | 960   | -760 | O0 |
| ATOM 9004 CB PHE C 171     | -48.012 | 13.079 | 43.737 | 1.00  | 37.46 |      | C0 |
| ANISOU 9004 CB PHE C 171   | 4560    | 5520   | 4150   | -660  | 860   | -830 | C0 |
| ATOM 9005 CG PHE C 171     | -46.660 | 12.534 | 44.112 | 1.00  | 37.08 |      | C0 |
| ANISOU 9005 CG PHE C 171   | 4620    | 5390   | 4080   | -720  | 770   | -830 | C0 |
| ATOM 9006 CD1 PHE C 171    | -46.215 | 11.329 | 43.594 | 1.00  | 36.49 |      | C0 |
| ANISOU 9006 CD1 PHE C 171  | 4610    | 5280   | 3970   | -760  | 650   | -760 | C0 |
| ATOM 9007 CD2 PHE C 171    | -45.852 | 13.205 | 45.016 | 1.00  | 37.42 |      | C0 |
| ANISOU 9007 CD2 PHE C 171  | 4710    | 5390   | 4120   | -720  | 790   | -920 | C0 |
| ATOM 9008 CE1 PHE C 171    | -44.982 | 10.818 | 43.960 | 1.00  | 36.54 |      | C0 |
| ANISOU 9008 CE1 PHE C 171  | 4710    | 5220   | 3950   | -790  | 560   | -770 | C0 |
| ATOM 9009 CE2 PHE C 171    | -44.616 | 12.692 | 45.378 | 1.00  | 37.11 |      | C0 |
| ANISOU 9009 CE2 PHE C 171  | 4760    | 5290   | 4050   | -770  | 690   | -920 | C0 |
| ATOM 9010 CZ PHE C 171     | -44.185 | 11.501 | 44.847 | 1.00  | 36.68 |      | C0 |
| ANISOU 9010 CZ PHE C 171   | 4750    | 5210   | 3970   | -790  | 580   | -850 | C0 |
| ATOM 9011 H PHE C 171      | -49.169 | 10.726 | 43.819 | 1.00  | 37.91 |      | H0 |
| ANISOU 9011 H PHE C 171    | 4650    | 5740   | 4020   | -880  | 760   | -690 | H0 |
| ATOM 9012 HA PHE C 171     | -48.991 | 12.896 | 45.550 | 1.00  | 39.01 |      | H0 |
| ANISOU 9012 HA PHE C 171   | 4740    | 5900   | 4180   | -790  | 940   | -900 | H0 |
| ATOM 9013 HB2 PHE C 171    | -48.210 | 12.834 | 42.809 | 1.00  | 37.04 |      | H0 |
| ANISOU 9013 HB2 PHE C 171  | 4480    | 5450   | 4140   | -630  | 840   | -770 | H0 |
| ATOM 9014 HB3 PHE C 171    | -47.990 | 14.057 | 43.794 | 1.00  | 37.76 |      | H0 |
| ANISOU 9014 HB3 PHE C 171  | 4570    | 5520   | 4250   | -590  | 930   | -890 | H0 |
| ATOM 9015 HD1 PHE C 171    | -46.758 | 10.854 | 42.985 | 1.00  | 36.41 |      | H0 |
| ANISOU 9015 HD1 PHE C 171  | 4580    | 5300   | 3960   | -770  | 630   | -700 | H0 |

|                           |         |        |        |      |       |       |    |
|---------------------------|---------|--------|--------|------|-------|-------|----|
| ATOM 9016 HD2 PHE C 171   | -46.145 | 14.023 | 45.383 | 1.00 | 37.97 | H0    |    |
| ANISOU 9016 HD2 PHE C 171 | 4750    | 5470   | 4200   | -690 | 860   | -980  | H0 |
| ATOM 9017 HE1 PHE C 171   | -44.685 | 10.001 | 43.593 | 1.00 | 36.09 | H0    |    |
| ANISOU 9017 HE1 PHE C 171 | 4690    | 5140   | 3880   | -800 | 480   | -720  | H0 |
| ATOM 9018 HE2 PHE C 171   | -44.071 | 13.163 | 45.987 | 1.00 | 37.41 | H0    |    |
| ANISOU 9018 HE2 PHE C 171 | 4820    | 5310   | 4080   | -780 | 710   | -980  | H0 |
| ATOM 9019 HZ PHE C 171    | -43.343 | 11.151 | 45.092 | 1.00 | 36.56 | H0    |    |
| ANISOU 9019 HZ PHE C 171  | 4790    | 5170   | 3940   | -810 | 510   | -850  | H0 |
| ATOM 9020 N GLU C 172     | -50.782 | 14.333 | 44.359 | 1.00 | 40.17 | N0    |    |
| ANISOU 9020 N GLU C 172   | 4670    | 6130   | 4470   | -580 | 1090  | -930  | N0 |
| ATOM 9021 CA GLU C 172    | -52.015 | 15.020 | 43.898 | 1.00 | 41.84 | C0    |    |
| ANISOU 9021 CA GLU C 172  | 4740    | 6430   | 4720   | -470 | 1170  | -940  | C0 |
| ATOM 9022 C GLU C 172     | -51.642 | 16.424 | 43.415 | 1.00 | 41.99 | C0    |    |
| ANISOU 9022 C GLU C 172   | 4770    | 6300   | 4890   | -300 | 1210  | -1000 | C0 |
| ATOM 9023 O GLU C 172     | -50.628 | 16.966 | 43.898 | 1.00 | 41.47 | O0    |    |
| ANISOU 9023 O GLU C 172   | 4800    | 6110   | 4850   | -300 | 1210  | -1060 | O0 |
| ATOM 9024 CB GLU C 172    | -53.060 | 15.066 | 45.017 | 1.00 | 44.01 | C0    |    |
| ANISOU 9024 CB GLU C 172  | 4930    | 6900   | 4890   | -520 | 1260  | -1020 | C0 |
| ATOM 9025 CG GLU C 172    | -52.596 | 15.800 | 46.262 | 1.00 | 45.08 | C0    |    |
| ANISOU 9025 CG GLU C 172  | 5120    | 7020   | 4990   | -510 | 1320  | -1150 | C0 |
| ATOM 9026 CD GLU C 172    | -53.512 | 15.630 | 47.460 | 1.00 | 47.68 | C0    |    |
| ANISOU 9026 CD GLU C 172  | 5380    | 7570   | 5170   | -590 | 1410  | -1220 | C0 |
| ATOM 9027 OE1 GLU C 172   | -54.555 | 14.973 | 47.306 | 1.00 | 49.76 | O0    |    |
| ANISOU 9027 OE1 GLU C 172 | 5530    | 8010   | 5360   | -660 | 1420  | -1170 | O0 |
| ATOM 9028 OE2 GLU C 172   | -53.181 | 16.156 | 48.545 | 1.00 | 48.83 | O0    |    |
| ANISOU 9028 OE2 GLU C 172 | 5570    | 7710   | 5270   | -610 | 1460  | -1330 | O0 |
| ATOM 9029 H GLU C 172     | -50.207 | 14.882 | 44.804 | 1.00 | 40.34 | H0    |    |
| ANISOU 9029 H GLU C 172   | 4740    | 6080   | 4510   | -560 | 1100  | -990  | H0 |
| ATOM 9030 HA GLU C 172    | -52.387 | 14.516 | 43.138 | 1.00 | 41.49 | H0    |    |
| ANISOU 9030 HA GLU C 172  | 4660    | 6410   | 4690   | -480 | 1130  | -870  | H0 |
| ATOM 9031 HB2 GLU C 172   | -53.867 | 15.502 | 44.673 | 1.00 | 44.60 | H0    |    |
| ANISOU 9031 HB2 GLU C 172 | 4900    | 7050   | 5000   | -430 | 1310  | -1030 | H0 |
| ATOM 9032 HB3 GLU C 172   | -53.295 | 14.146 | 45.258 | 1.00 | 43.96 | H0    |    |
| ANISOU 9032 HB3 GLU C 172 | 4930    | 6990   | 4790   | -640 | 1230  | -970  | H0 |
| ATOM 9033 HG2 GLU C 172   | -51.703 | 15.481 | 46.508 | 1.00 | 44.55 | H0    |    |
| ANISOU 9033 HG2 GLU C 172 | 5160    | 6860   | 4910   | -580 | 1270  | -1130 | H0 |
| ATOM 9034 HG3 GLU C 172   | -52.524 | 16.757 | 46.060 | 1.00 | 45.49 | H0    |    |
| ANISOU 9034 HG3 GLU C 172 | 5160    | 6990   | 5130   | -390 | 1360  | -1200 | H0 |
| ATOM 9035 N ILE C 173     | -52.450 | 16.977 | 42.510 | 1.00 | 42.91 | N0    |    |
| ANISOU 9035 N ILE C 173   | 4790    | 6430   | 5080   | -170 | 1230  | -980  | N0 |
| ATOM 9036 CA ILE C 173    | -52.237 | 18.308 | 41.871 | 1.00 | 43.90 | C0    |    |
| ANISOU 9036 CA ILE C 173  | 4930    | 6400   | 5350   | 0    | 1260  | -1010 | C0 |
| ATOM 9037 C ILE C 173     | -53.058 | 19.358 | 42.626 | 1.00 | 45.81 | C0    |    |
| ANISOU 9037 C ILE C 173   | 5110    | 6700   | 5600   | 130  | 1360  | -1130 | C0 |
| ATOM 9038 O ILE C 173     | -54.266 | 19.133 | 42.828 | 1.00 | 47.11 | O0    |    |
| ANISOU 9038 O ILE C 173   | 5140    | 7050   | 5710   | 150  | 1400  | -1150 | O0 |
| ATOM 9039 CB ILE C 173    | -52.622 | 18.248 | 40.382 | 1.00 | 43.91 | C0    |    |
| ANISOU 9039 CB ILE C 173  | 4880    | 6380   | 5420   | 80   | 1210  | -900  | C0 |
| ATOM 9040 CG1 ILE C 173   | -51.662 | 17.356 | 39.591 | 1.00 | 43.07 | C0    |    |
| ANISOU 9040 CG1 ILE C 173 | 4850    | 6200   | 5320   | -20  | 1110  | -790  | C0 |
| ATOM 9041 CG2 ILE C 173   | -52.722 | 19.647 | 39.796 | 1.00 | 44.93 | C0    |    |
| ANISOU 9041 CG2 ILE C 173 | 5020    | 6370   | 5680   | 260  | 1230  | -920  | C0 |
| ATOM 9042 CD1 ILE C 173   | -52.050 | 17.161 | 38.144 | 1.00 | 43.03 | C0    |    |
| ANISOU 9042 CD1 ILE C 173 | 4800    | 6190   | 5360   | 30   | 1060  | -690  | C0 |

|                            |         |        |        |      |       |       |    |
|----------------------------|---------|--------|--------|------|-------|-------|----|
| ATOM 9043 H ILE C 173      | -53.207 | 16.561 | 42.221 | 1.00 | 43.21 | H0    |    |
| ANISOU 9043 H ILE C 173    | 4750    | 6580   | 5090   | -180 | 1230  | -940  | H0 |
| ATOM 9044 HA ILE C 173     | -51.294 | 18.538 | 41.938 | 1.00 | 43.34 | H0    |    |
| ANISOU 9044 HA ILE C 173   | 4960    | 6210   | 5300   | -20  | 1230  | -1020 | H0 |
| ATOM 9045 HB ILE C 173     | -53.518 | 17.837 | 40.325 | 1.00 | 44.49 | H0    |    |
| ANISOU 9045 HB ILE C 173   | 4860    | 6590   | 5450   | 70   | 1220  | -880  | H0 |
| ATOM 9046 HG12 ILE C 173   | -50.765 | 17.753 | 39.625 | 1.00 | 42.59 | H0    |    |
| ANISOU 9046 HG12 ILE C 173 | 4870    | 6020   | 5290   | -20  | 1100  | -810  | H0 |
| ATOM 9047 HG13 ILE C 173   | -51.618 | 16.478 | 40.025 | 1.00 | 42.65 | H0    |    |
| ANISOU 9047 HG13 ILE C 173 | 4810    | 6220   | 5180   | -130 | 1090  | -780  | H0 |
| ATOM 9048 HG21 ILE C 173   | -53.507 | 20.097 | 40.154 | 1.00 | 45.98 | H0    |    |
| ANISOU 9048 HG21 ILE C 173 | 5080    | 6580   | 5810   | 340  | 1290  | -980  | H0 |
| ATOM 9049 HG22 ILE C 173   | -52.800 | 19.594 | 38.829 | 1.00 | 44.51 | H0    |    |
| ANISOU 9049 HG22 ILE C 173 | 4950    | 6290   | 5670   | 290  | 1190  | -840  | H0 |
| ATOM 9050 HG23 ILE C 173   | -51.925 | 20.155 | 40.028 | 1.00 | 44.70 | H0    |    |
| ANISOU 9050 HG23 ILE C 173 | 5080    | 6220   | 5680   | 260  | 1240  | -960  | H0 |
| ATOM 9051 HD11 ILE C 173   | -53.007 | 16.996 | 38.083 | 1.00 | 43.53 | H0    |    |
| ANISOU 9051 HD11 ILE C 173 | 4770    | 6370   | 5400   | 50   | 1080  | -670  | H0 |
| ATOM 9052 HD12 ILE C 173   | -51.567 | 16.400 | 37.778 | 1.00 | 42.05 | H0    |    |
| ANISOU 9052 HD12 ILE C 173 | 4710    | 6050   | 5210   | -50  | 1010  | -630  | H0 |
| ATOM 9053 HD13 ILE C 173   | -51.826 | 17.959 | 37.635 | 1.00 | 43.05 | H0    |    |
| ANISOU 9053 HD13 ILE C 173 | 4820    | 6090   | 5440   | 120  | 1070  | -680  | H0 |
| ATOM 9054 N LEU C 174      | -52.431 | 20.478 | 42.988 | 1.00 | 46.68 | N0    |    |
| ANISOU 9054 N LEU C 174    | 5310    | 6650   | 5770   | 200  | 1390  | -1220 | N0 |
| ATOM 9055 CA LEU C 174     | -53.101 | 21.647 | 43.615 | 1.00 | 49.21 | C0    |    |
| ANISOU 9055 CA LEU C 174   | 5600    | 6970   | 6120   | 350  | 1480  | -1360 | C0 |
| ATOM 9056 C LEU C 174      | -53.487 | 22.648 | 42.520 | 1.00 | 50.25 | C0    |    |
| ANISOU 9056 C LEU C 174    | 5730    | 6980   | 6390   | 550  | 1460  | -1330 | C0 |
| ATOM 9057 O LEU C 174      | -54.632 | 23.116 | 42.528 | 1.00 | 51.79 | O0    |    |
| ANISOU 9057 O LEU C 174    | 5810    | 7270   | 6600   | 700  | 1510  | -1380 | O0 |
| ATOM 9058 CB LEU C 174     | -52.163 | 22.265 | 44.654 | 1.00 | 49.63 | C0    |    |
| ANISOU 9058 CB LEU C 174   | 5790    | 6910   | 6160   | 310  | 1500  | -1480 | C0 |
| ATOM 9059 CG LEU C 174     | -51.553 | 21.275 | 45.647 | 1.00 | 49.50 | C0    |    |
| ANISOU 9059 CG LEU C 174   | 5810    | 6980   | 6010   | 110  | 1490  | -1480 | C0 |
| ATOM 9060 CD1 LEU C 174    | -50.614 | 21.978 | 46.613 | 1.00 | 50.22 | C0    |    |
| ANISOU 9060 CD1 LEU C 174  | 6030    | 6950   | 6090   | 70   | 1510  | -1600 | C0 |
| ATOM 9061 CD2 LEU C 174    | -52.639 | 20.524 | 46.408 | 1.00 | 50.49 | C0    |    |
| ANISOU 9061 CD2 LEU C 174  | 5810    | 7370   | 6000   | 50   | 1550  | -1510 | C0 |
| ATOM 9062 H LEU C 174      | -51.536 | 20.596 | 42.862 | 1.00 | 46.08 | H0    |    |
| ANISOU 9062 H LEU C 174    | 5330    | 6450   | 5730   | 170  | 1350  | -1210 | H0 |
| ATOM 9063 HA LEU C 174     | -53.923 | 21.336 | 44.060 | 1.00 | 49.90 | H0    |    |
| ANISOU 9063 HA LEU C 174   | 5590    | 7230   | 6140   | 350  | 1520  | -1390 | H0 |
| ATOM 9064 HB2 LEU C 174    | -51.436 | 22.719 | 44.182 | 1.00 | 49.28 | H0    |    |
| ANISOU 9064 HB2 LEU C 174  | 5830    | 6700   | 6190   | 330  | 1470  | -1450 | H0 |
| ATOM 9065 HB3 LEU C 174    | -52.659 | 22.942 | 45.155 | 1.00 | 51.05 | H0    |    |
| ANISOU 9065 HB3 LEU C 174  | 5950    | 7100   | 6340   | 400  | 1570  | -1580 | H0 |
| ATOM 9066 HG LEU C 174     | -51.025 | 20.613 | 45.137 | 1.00 | 48.26 | H0    |    |
| ANISOU 9066 HG LEU C 174   | 5680    | 6790   | 5860   | 30   | 1420  | -1390 | H0 |
| ATOM 9067 HD11 LEU C 174   | -49.894 | 22.403 | 46.115 | 1.00 | 49.64 | H0    |    |
| ANISOU 9067 HD11 LEU C 174 | 6030    | 6730   | 6100   | 90   | 1470  | -1580 | H0 |
| ATOM 9068 HD12 LEU C 174   | -50.238 | 21.329 | 47.233 | 1.00 | 49.72 | H0    |    |
| ANISOU 9068 HD12 LEU C 174 | 5990    | 6960   | 5940   | -50  | 1500  | -1600 | H0 |
| ATOM 9069 HD13 LEU C 174   | -51.106 | 22.654 | 47.111 | 1.00 | 51.39 | H0    |    |
| ANISOU 9069 HD13 LEU C 174 | 6160    | 7120   | 6240   | 160  | 1580  | -1700 | H0 |

|                            |         |        |        |      |       |       |    |
|----------------------------|---------|--------|--------|------|-------|-------|----|
| ATOM 9070 HD21 LEU C 174   | -53.298 | 21.157 | 46.742 | 1.00 | 51.72 | H0    |    |
| ANISOU 9070 HD21 LEU C 174 | 5910    | 7570   | 6160   | 150  | 1620  | -1600 | H0 |
| ATOM 9071 HD22 LEU C 174   | -52.241 | 20.046 | 47.155 | 1.00 | 50.24 | H0    |    |
| ANISOU 9071 HD22 LEU C 174 | 5830    | 7380   | 5890   | -70  | 1540  | -1530 | H0 |
| ATOM 9072 HD23 LEU C 174   | -53.074 | 19.889 | 45.813 | 1.00 | 49.98 | H0    |    |
| ANISOU 9072 HD23 LEU C 174 | 5680    | 7380   | 5930   | 30   | 1520  | -1420 | H0 |
| ATOM 9073 N ASP C 175      | -52.576 | 22.932 | 41.586 | 1.00 | 50.43 | N0    |    |
| ANISOU 9073 N ASP C 175    | 5860    | 6800   | 6500   | 540  | 1400  | -1250 | N0 |
| ATOM 9074 CA ASP C 175     | -52.811 | 23.904 | 40.486 | 1.00 | 51.74 | C0    |    |
| ANISOU 9074 CA ASP C 175   | 6050    | 6820   | 6790   | 710  | 1370  | -1200 | C0 |
| ATOM 9075 C ASP C 175      | -51.809 | 23.644 | 39.355 | 1.00 | 50.11 | C0    |    |
| ANISOU 9075 C ASP C 175    | 5920    | 6480   | 6630   | 620  | 1280  | -1060 | C0 |
| ATOM 9076 O ASP C 175      | -50.684 | 23.184 | 39.636 | 1.00 | 47.50 | O0    |    |
| ANISOU 9076 O ASP C 175    | 5670    | 6110   | 6260   | 470  | 1260  | -1060 | O0 |
| ATOM 9077 CB ASP C 175     | -52.734 | 25.342 | 41.012 | 1.00 | 54.50 | C0    |    |
| ANISOU 9077 CB ASP C 175   | 6500    | 7000   | 7210   | 850  | 1410  | -1320 | C0 |
| ATOM 9078 CG ASP C 175     | -53.178 | 26.399 | 40.011 | 1.00 | 56.92 | C0    |    |
| ANISOU 9078 CG ASP C 175   | 6830    | 7160   | 7640   | 1040 | 1380  | -1280 | C0 |
| ATOM 9079 OD1 ASP C 175    | -54.396 | 26.547 | 39.810 | 1.00 | 58.86 | O0    |    |
| ANISOU 9079 OD1 ASP C 175  | 6950    | 7520   | 7900   | 1200 | 1390  | -1300 | O0 |
| ATOM 9080 OD2 ASP C 175    | -52.296 | 27.057 | 39.427 | 1.00 | 59.32 | O0    |    |
| ANISOU 9080 OD2 ASP C 175  | 7290    | 7230   | 8010   | 1020 | 1330  | -1240 | O0 |
| ATOM 9081 H ASP C 175      | -51.749 | 22.551 | 41.573 | 1.00 | 49.27 | H0    |    |
| ANISOU 9081 H ASP C 175    | 5780    | 6610   | 6340   | 440  | 1360  | -1210 | H0 |
| ATOM 9082 HA ASP C 175     | -53.720 | 23.755 | 40.136 | 1.00 | 52.29 | H0    |    |
| ANISOU 9082 HA ASP C 175   | 6010    | 7000   | 6860   | 790  | 1370  | -1170 | H0 |
| ATOM 9083 HB2 ASP C 175    | -53.298 | 25.421 | 41.808 | 1.00 | 55.45 | H0    |    |
| ANISOU 9083 HB2 ASP C 175  | 6560    | 7220   | 7290   | 890  | 1470  | -1420 | H0 |
| ATOM 9084 HB3 ASP C 175    | -51.811 | 25.535 | 41.273 | 1.00 | 54.09 | H0    |    |
| ANISOU 9084 HB3 ASP C 175  | 6550    | 6830   | 7160   | 760  | 1400  | -1340 | H0 |
| ATOM 9085 N VAL C 176      | -52.234 | 23.904 | 38.117 | 1.00 | 50.76 | N0    |    |
| ANISOU 9085 N VAL C 176    | 5980    | 6520   | 6780   | 720  | 1240  | -960  | N0 |
| ATOM 9086 CA VAL C 176     | -51.367 | 23.952 | 36.906 | 1.00 | 50.13 | C0    |    |
| ANISOU 9086 CA VAL C 176   | 5990    | 6310   | 6750   | 670  | 1170  | -840  | C0 |
| ATOM 9087 C VAL C 176      | -51.623 | 25.301 | 36.231 | 1.00 | 52.11 | C0    |    |
| ANISOU 9087 C VAL C 176    | 6310    | 6380   | 7110   | 830  | 1150  | -820  | C0 |
| ATOM 9088 O VAL C 176      | -52.776 | 25.546 | 35.831 | 1.00 | 52.76 | O0    |    |
| ANISOU 9088 O VAL C 176    | 6300    | 6520   | 7220   | 990  | 1150  | -800  | O0 |
| ATOM 9089 CB VAL C 176     | -51.626 | 22.770 | 35.950 | 1.00 | 49.14 | C0    |    |
| ANISOU 9089 CB VAL C 176   | 5770    | 6320   | 6590   | 610  | 1110  | -710  | C0 |
| ATOM 9090 CG1 VAL C 176    | -50.685 | 22.809 | 34.754 | 1.00 | 48.34 | C0    |    |
| ANISOU 9090 CG1 VAL C 176  | 5750    | 6090   | 6520   | 550  | 1050  | -600  | C0 |
| ATOM 9091 CG2 VAL C 176    | -51.523 | 21.428 | 36.662 | 1.00 | 47.82 | C0    |    |
| ANISOU 9091 CG2 VAL C 176  | 5540    | 6310   | 6310   | 460  | 1120  | -730  | C0 |
| ATOM 9092 H VAL C 176      | -53.109 | 24.073 | 37.933 | 1.00 | 51.56 | H0    |    |
| ANISOU 9092 H VAL C 176    | 6000    | 6690   | 6900   | 830  | 1250  | -960  | H0 |
| ATOM 9093 HA VAL C 176     | -50.440 | 23.919 | 37.192 | 1.00 | 49.60 | H0    |    |
| ANISOU 9093 HA VAL C 176   | 6000    | 6170   | 6680   | 570  | 1160  | -860  | H0 |
| ATOM 9094 HB VAL C 176     | -52.550 | 22.862 | 35.610 | 1.00 | 49.76 | H0    |    |
| ANISOU 9094 HB VAL C 176   | 5760    | 6460   | 6680   | 700  | 1110  | -690  | H0 |
| ATOM 9095 HG11 VAL C 176   | -50.967 | 23.509 | 34.140 | 1.00 | 49.06 | H0    |    |
| ANISOU 9095 HG11 VAL C 176 | 5860    | 6110   | 6670   | 640  | 1040  | -570  | H0 |
| ATOM 9096 HG12 VAL C 176   | -50.706 | 21.950 | 34.296 | 1.00 | 47.47 | H0    |    |
| ANISOU 9096 HG12 VAL C 176 | 5590    | 6070   | 6370   | 490  | 1020  | -540  | H0 |

|                            |         |        |        |      |       |       |    |
|----------------------------|---------|--------|--------|------|-------|-------|----|
| ATOM 9097 HG13 VAL C 176   | -49.779 | 22.991 | 35.059 | 1.00 | 47.98 | H0    |    |
| ANISOU 9097 HG13 VAL C 176 | 5790    | 5960   | 6480   | 480  | 1060  | -630  | H0 |
| ATOM 9098 HG21 VAL C 176   | -50.613 | 21.298 | 36.981 | 1.00 | 47.26 | H0    |    |
| ANISOU 9098 HG21 VAL C 176 | 5550    | 6180   | 6230   | 370  | 1110  | -750  | H0 |
| ATOM 9099 HG22 VAL C 176   | -51.753 | 20.713 | 36.042 | 1.00 | 47.32 | H0    |    |
| ANISOU 9099 HG22 VAL C 176 | 5430    | 6330   | 6220   | 420  | 1080  | -660  | H0 |
| ATOM 9100 HG23 VAL C 176   | -52.136 | 21.410 | 37.416 | 1.00 | 48.58 | H0    |    |
| ANISOU 9100 HG23 VAL C 176 | 5580    | 6500   | 6370   | 480  | 1160  | -800  | H0 |
| ATOM 9101 N THR C 177      | -50.593 | 26.151 | 36.176 | 1.00 | 52.72 | N0    |    |
| ANISOU 9101 N THR C 177    | 6550    | 6240   | 7240   | 800  | 1140  | -830  | N0 |
| ATOM 9102 CA THR C 177     | -50.583 | 27.466 | 35.485 | 1.00 | 54.62 | C0    |    |
| ANISOU 9102 CA THR C 177   | 6910    | 6260   | 7580   | 910  | 1110  | -800  | C0 |
| ATOM 9103 C THR C 177      | -49.713 | 27.339 | 34.229 | 1.00 | 53.51 | C0    |    |
| ANISOU 9103 C THR C 177    | 6840    | 6050   | 7450   | 800  | 1040  | -650  | C0 |
| ATOM 9104 O THR C 177      | -48.633 | 26.725 | 34.320 | 1.00 | 51.40 | O0    |    |
| ANISOU 9104 O THR C 177    | 6590    | 5810   | 7130   | 620  | 1040  | -640  | O0 |
| ATOM 9105 CB THR C 177     | -50.085 | 28.576 | 36.422 | 1.00 | 56.48 | C0    |    |
| ANISOU 9105 CB THR C 177   | 7300    | 6310   | 7850   | 930  | 1140  | -930  | C0 |
| ATOM 9106 OG1 THR C 177    | -50.765 | 28.441 | 37.671 | 1.00 | 58.08 | O0    |    |
| ANISOU 9106 OG1 THR C 177  | 7420    | 6640   | 8010   | 990  | 1210  | -1070 | O0 |
| ATOM 9107 CG2 THR C 177    | -50.316 | 29.970 | 35.877 | 1.00 | 58.50 | C0    |    |
| ANISOU 9107 CG2 THR C 177  | 7690    | 6330   | 8200   | 1080 | 1110  | -910  | C0 |
| ATOM 9108 H THR C 177      | -49.794 | 25.974 | 36.577 | 1.00 | 52.10 | H0    |    |
| ANISOU 9108 H THR C 177    | 6520    | 6140   | 7130   | 690  | 1150  | -860  | H0 |
| ATOM 9109 HA THR C 177     | -51.505 | 27.677 | 35.210 | 1.00 | 55.46 | H0    |    |
| ANISOU 9109 HA THR C 177   | 6960    | 6410   | 7710   | 1050 | 1100  | -790  | H0 |
| ATOM 9110 HB THR C 177     | -49.118 | 28.448 | 36.569 | 1.00 | 55.81 | H0    |    |
| ANISOU 9110 HB THR C 177   | 7280    | 6190   | 7740   | 790  | 1140  | -930  | H0 |
| ATOM 9111 HG21 THR C 177   | -49.775 | 30.102 | 35.077 | 1.00 | 58.14 | H0    |    |
| ANISOU 9111 HG21 THR C 177 | 7720    | 6200   | 8170   | 1010 | 1060  | -810  | H0 |
| ATOM 9112 HG22 THR C 177   | -50.064 | 30.629 | 36.549 | 1.00 | 59.36 | H0    |    |
| ANISOU 9112 HG22 THR C 177 | 7900    | 6330   | 8330   | 1090 | 1130  | -1000 | H0 |
| ATOM 9113 HG23 THR C 177   | -51.257 | 30.081 | 35.652 | 1.00 | 59.25 | H0    |    |
| ANISOU 9113 HG23 THR C 177 | 7720    | 6470   | 8320   | 1230 | 1100  | -900  | H0 |
| ATOM 9114 N GLN C 178      | -50.179 | 27.881 | 33.104 | 1.00 | 54.69 | N0    |    |
| ANISOU 9114 N GLN C 178    | 7020    | 6120   | 7650   | 900  | 990   | -550  | N0 |
| ATOM 9115 CA GLN C 178     | -49.452 | 27.881 | 31.811 | 1.00 | 54.98 | C0    |    |
| ANISOU 9115 CA GLN C 178   | 7120    | 6080   | 7690   | 810  | 930   | -400  | C0 |
| ATOM 9116 C GLN C 178      | -49.312 | 29.335 | 31.352 | 1.00 | 56.86 | C0    |    |
| ANISOU 9116 C GLN C 178    | 7540    | 6060   | 8010   | 880  | 890   | -360  | C0 |
| ATOM 9117 O GLN C 178      | -50.329 | 30.057 | 31.349 | 1.00 | 58.15 | O0    |    |
| ANISOU 9117 O GLN C 178    | 7710    | 6160   | 8230   | 1080 | 880   | -380  | O0 |
| ATOM 9118 CB GLN C 178     | -50.168 | 26.977 | 30.806 | 1.00 | 55.10 | C0    |    |
| ANISOU 9118 CB GLN C 178   | 7000    | 6270   | 7670   | 840  | 890   | -290  | C0 |
| ATOM 9119 CG GLN C 178     | -50.593 | 25.639 | 31.406 | 1.00 | 54.67 | C0    |    |
| ANISOU 9119 CG GLN C 178   | 6780    | 6450   | 7540   | 790  | 920   | -340  | C0 |
| ATOM 9120 CD GLN C 178     | -50.549 | 24.472 | 30.449 | 1.00 | 54.09 | C0    |    |
| ANISOU 9120 CD GLN C 178   | 6620    | 6520   | 7410   | 700  | 880   | -230  | C0 |
| ATOM 9121 OE1 GLN C 178    | -50.093 | 24.578 | 29.314 | 1.00 | 55.59 | O0    |    |
| ANISOU 9121 OE1 GLN C 178  | 6860    | 6660   | 7600   | 660  | 840   | -130  | O0 |
| ATOM 9122 NE2 GLN C 178    | -51.021 | 23.328 | 30.912 | 1.00 | 53.30 | N0    |    |
| ANISOU 9122 NE2 GLN C 178  | 6400    | 6610   | 7240   | 660  | 900   | -270  | N0 |
| ATOM 9123 H GLN C 178      | -50.991 | 28.293 | 33.063 | 1.00 | 55.87 | H0    |    |
| ANISOU 9123 H GLN C 178    | 7140    | 6250   | 7830   | 1050 | 990   | -560  | H0 |

|                            |         |        |        |      |       |      |    |
|----------------------------|---------|--------|--------|------|-------|------|----|
| ATOM 9124 HA GLN C 178     | -48.551 | 27.517 | 31.967 | 1.00 | 54.03 | H0   |    |
| ANISOU 9124 HA GLN C 178   | 7020    | 5970   | 7530   | 670  | 940   | -410 | H0 |
| ATOM 9125 HB2 GLN C 178    | -50.960 | 27.447 | 30.471 | 1.00 | 56.17 | H0   |    |
| ANISOU 9125 HB2 GLN C 178  | 7120    | 6380   | 7840   | 970  | 870   | -260 | H0 |
| ATOM 9126 HB3 GLN C 178    | -49.568 | 26.818 | 30.048 | 1.00 | 54.55 | H0   |    |
| ANISOU 9126 HB3 GLN C 178  | 6970    | 6180   | 7580   | 750  | 860   | -210 | H0 |
| ATOM 9127 HG2 GLN C 178    | -50.011 | 25.436 | 32.168 | 1.00 | 54.10 | H0   |    |
| ANISOU 9127 HG2 GLN C 178  | 6730    | 6380   | 7450   | 710  | 960   | -410 | H0 |
| ATOM 9128 HG3 GLN C 178    | -51.508 | 25.726 | 31.751 | 1.00 | 55.37 | H0   |    |
| ANISOU 9128 HG3 GLN C 178  | 6800    | 6600   | 7640   | 900  | 940   | -380 | H0 |
| ATOM 9129 HE21 GLN C 178   | -51.422 | 22.761 | 30.365 | 1.00 | 52.95 | H0   |    |
| ANISOU 9129 HE21 GLN C 178 | 6290    | 6660   | 7170   | 660  | 870   | -210 | H0 |
| ATOM 9130 HE22 GLN C 178   | -50.935 | 23.128 | 31.770 | 1.00 | 53.09 | H0   |    |
| ANISOU 9130 HE22 GLN C 178 | 6360    | 6610   | 7200   | 630  | 930   | -340 | H0 |
| ATOM 9131 N LYS C 179      | -48.083 | 29.738 | 31.013 | 1.00 | 57.36 | N0   |    |
| ANISOU 9131 N LYS C 179    | 7740    | 5990   | 8060   | 720  | 880   | -320 | N0 |
| ATOM 9132 CA LYS C 179     | -47.678 | 31.140 | 30.718 | 1.00 | 59.04 | C0   |    |
| ANISOU 9132 CA LYS C 179   | 8160    | 5930   | 8340   | 720  | 840   | -290 | C0 |
| ATOM 9133 C LYS C 179      | -46.758 | 31.151 | 29.490 | 1.00 | 58.11 | C0   |    |
| ANISOU 9133 C LYS C 179    | 8120    | 5780   | 8190   | 550  | 800   | -140 | C0 |
| ATOM 9134 O LYS C 179      | -45.872 | 30.287 | 29.409 | 1.00 | 56.21 | O0   |    |
| ANISOU 9134 O LYS C 179    | 7800    | 5680   | 7880   | 380  | 820   | -140 | O0 |
| ATOM 9135 CB LYS C 179     | -46.983 | 31.746 | 31.943 | 1.00 | 60.44 | C0   |    |
| ANISOU 9135 CB LYS C 179   | 8450    | 5990   | 8530   | 650  | 890   | -430 | C0 |
| ATOM 9136 CG LYS C 179     | -46.058 | 32.921 | 31.660 | 1.00 | 62.99 | C0   |    |
| ANISOU 9136 CG LYS C 179   | 9000    | 6050   | 8880   | 540  | 860   | -400 | C0 |
| ATOM 9137 CD LYS C 179     | -45.604 | 33.667 | 32.897 | 1.00 | 64.69 | C0   |    |
| ANISOU 9137 CD LYS C 179   | 9350    | 6120   | 9110   | 510  | 890   | -550 | C0 |
| ATOM 9138 CE LYS C 179     | -44.823 | 34.921 | 32.562 | 1.00 | 66.76 | C0   |    |
| ANISOU 9138 CE LYS C 179   | 9860    | 6110   | 9410   | 400  | 850   | -510 | C0 |
| ATOM 9139 NZ LYS C 179     | -44.508 | 35.715 | 33.774 | 1.00 | 68.39 | N0   |    |
| ANISOU 9139 NZ LYS C 179   | 10200   | 6150   | 9630   | 380  | 870   | -670 | N0 |
| ATOM 9140 H LYS C 179      | -47.390 | 29.151 | 30.941 | 1.00 | 56.04 | H0   |    |
| ANISOU 9140 H LYS C 179    | 7540    | 5900   | 7850   | 590  | 890   | -310 | H0 |
| ATOM 9141 HA LYS C 179     | -48.487 | 31.665 | 30.515 | 1.00 | 60.31 | H0   |    |
| ANISOU 9141 HA LYS C 179   | 8350    | 6020   | 8540   | 880  | 820   | -270 | H0 |
| ATOM 9142 HB2 LYS C 179    | -47.673 | 32.040 | 32.574 | 1.00 | 61.31 | H0   |    |
| ANISOU 9142 HB2 LYS C 179  | 8550    | 6070   | 8670   | 790  | 910   | -520 | H0 |
| ATOM 9143 HB3 LYS C 179    | -46.462 | 31.041 | 32.381 | 1.00 | 59.24 | H0   |    |
| ANISOU 9143 HB3 LYS C 179  | 8230    | 5950   | 8320   | 540  | 920   | -480 | H0 |
| ATOM 9144 HG2 LYS C 179    | -45.265 | 32.590 | 31.185 | 1.00 | 62.05 | H0   |    |
| ANISOU 9144 HG2 LYS C 179  | 8880    | 5980   | 8720   | 380  | 850   | -330 | H0 |
| ATOM 9145 HG3 LYS C 179    | -46.521 | 33.549 | 31.064 | 1.00 | 64.08 | H0   |    |
| ANISOU 9145 HG3 LYS C 179  | 9220    | 6070   | 9060   | 640  | 810   | -330 | H0 |
| ATOM 9146 HD2 LYS C 179    | -46.390 | 33.913 | 33.430 | 1.00 | 65.35 | H0   |    |
| ANISOU 9146 HD2 LYS C 179  | 9420    | 6180   | 9230   | 670  | 910   | -630 | H0 |
| ATOM 9147 HD3 LYS C 179    | -45.041 | 33.076 | 33.441 | 1.00 | 63.45 | H0   |    |
| ANISOU 9147 HD3 LYS C 179  | 9120    | 6080   | 8910   | 390  | 930   | -610 | H0 |
| ATOM 9148 HE2 LYS C 179    | -43.989 | 34.677 | 32.119 | 1.00 | 66.07 | H0   |    |
| ANISOU 9148 HE2 LYS C 179  | 9770    | 6060   | 9280   | 220  | 840   | -440 | H0 |
| ATOM 9149 HE3 LYS C 179    | -45.341 | 35.474 | 31.947 | 1.00 | 67.93 | H0   |    |
| ANISOU 9149 HE3 LYS C 179  | 10080   | 6130   | 9600   | 500  | 800   | -440 | H0 |
| ATOM 9150 HZ1 LYS C 179    | -45.276 | 35.968 | 34.184 | 1.00 | 69.04 | H0   |    |
| ANISOU 9150 HZ1 LYS C 179  | 10280   | 6200   | 9750   | 550  | 880   | -740 | H0 |



|                           |         |        |        |      |       |      |    |
|---------------------------|---------|--------|--------|------|-------|------|----|
| ATOM 9151 HZ2 LYS C 179   | -44.036 | 36.455 | 33.544 | 1.00 | 69.40 |      | H0 |
| ANISOU 9151 HZ2 LYS C 179 | 10480   | 6110   | 9780   | 300  | 840   | -640 | H0 |
| ATOM 9152 HZ3 LYS C 179   | -44.015 | 35.216 | 34.349 | 1.00 | 67.27 |      | H0 |
| ANISOU 9152 HZ3 LYS C 179 | 9990    | 6120   | 9450   | 280  | 910   | -730 | H0 |
| ATOM 9153 N LYS C 180     | -46.967 | 32.111 | 28.586 | 1.00 | 59.58 |      | N0 |
| ANISOU 9153 N LYS C 180   | 8440    | 5780   | 8410   | 610  | 740   | -30  | N0 |
| ATOM 9154 CA LYS C 180    | -46.134 | 32.355 | 27.378 | 1.00 | 59.17 |      | C0 |
| ANISOU 9154 CA LYS C 180  | 8490    | 5670   | 8320   | 440  | 690   | 120  | C0 |
| ATOM 9155 C LYS C 180     | -44.969 | 33.284 | 27.748 | 1.00 | 59.35 |      | C0 |
| ANISOU 9155 C LYS C 180   | 8700    | 5500   | 8350   | 270  | 700   | 90   | C0 |
| ATOM 9156 O LYS C 180     | -45.206 | 34.292 | 28.446 | 1.00 | 60.80 |      | O0 |
| ANISOU 9156 O LYS C 180   | 9030    | 5470   | 8600   | 350  | 690   | 10   | O0 |
| ATOM 9157 CB LYS C 180    | -46.987 | 32.979 | 26.267 | 1.00 | 61.08 |      | C0 |
| ANISOU 9157 CB LYS C 180  | 8800    | 5810   | 8600   | 580  | 610   | 260  | C0 |
| ATOM 9158 CG LYS C 180    | -46.294 | 33.144 | 24.921 | 1.00 | 61.58 |      | C0 |
| ANISOU 9158 CG LYS C 180  | 8950    | 5840   | 8600   | 420  | 560   | 430  | C0 |
| ATOM 9159 CD LYS C 180    | -46.643 | 34.439 | 24.217 | 1.00 | 64.05 |      | C0 |
| ANISOU 9159 CD LYS C 180  | 9480    | 5890   | 8960   | 490  | 470   | 550  | C0 |
| ATOM 9160 CE LYS C 180    | -46.073 | 34.525 | 22.817 | 1.00 | 64.25 |      | C0 |
| ANISOU 9160 CE LYS C 180  | 9580    | 5920   | 8910   | 320  | 420   | 740  | C0 |
| ATOM 9161 NZ LYS C 180    | -46.748 | 33.583 | 21.892 | 1.00 | 63.11 |      | N0 |
| ANISOU 9161 NZ LYS C 180  | 9270    | 6000   | 8720   | 390  | 390   | 830  | N0 |
| ATOM 9162 H LYS C 180     | -47.660 | 32.698 | 28.662 | 1.00 | 60.70 |      | H0 |
| ANISOU 9162 H LYS C 180   | 8630    | 5830   | 8610   | 760  | 710   | -40  | H0 |
| ATOM 9163 HA LYS C 180    | -45.774 | 31.495 | 27.063 | 1.00 | 57.80 |      | H0 |
| ANISOU 9163 HA LYS C 180  | 8210    | 5660   | 8090   | 350  | 710   | 150  | H0 |
| ATOM 9164 HB2 LYS C 180   | -47.782 | 32.420 | 26.139 | 1.00 | 60.52 |      | H0 |
| ANISOU 9164 HB2 LYS C 180 | 8600    | 5870   | 8530   | 700  | 600   | 270  | H0 |
| ATOM 9165 HB3 LYS C 180   | -47.291 | 33.860 | 26.570 | 1.00 | 62.56 |      | H0 |
| ANISOU 9165 HB3 LYS C 180 | 9110    | 5810   | 8840   | 680  | 580   | 240  | H0 |
| ATOM 9166 HG2 LYS C 180   | -45.324 | 33.106 | 25.055 | 1.00 | 61.10 |      | H0 |
| ANISOU 9166 HG2 LYS C 180 | 8930    | 5780   | 8510   | 240  | 590   | 420  | H0 |
| ATOM 9167 HG3 LYS C 180   | -46.545 | 32.392 | 24.345 | 1.00 | 60.58 |      | H0 |
| ANISOU 9167 HG3 LYS C 180 | 8710    | 5870   | 8430   | 420  | 550   | 490  | H0 |
| ATOM 9168 HD2 LYS C 180   | -47.619 | 34.524 | 24.169 | 1.00 | 64.58 |      | H0 |
| ANISOU 9168 HD2 LYS C 180 | 9520    | 5950   | 9070   | 680  | 430   | 560  | H0 |
| ATOM 9169 HD3 LYS C 180   | -46.300 | 35.191 | 24.745 | 1.00 | 65.04 |      | H0 |
| ANISOU 9169 HD3 LYS C 180 | 9750    | 5840   | 9120   | 470  | 470   | 500  | H0 |
| ATOM 9170 HE2 LYS C 180   | -46.179 | 35.434 | 22.477 | 1.00 | 66.01 |      | H0 |
| ANISOU 9170 HE2 LYS C 180 | 9980    | 5950   | 9160   | 350  | 360   | 810  | H0 |
| ATOM 9171 HE3 LYS C 180   | -45.120 | 34.319 | 22.840 | 1.00 | 63.60 |      | H0 |
| ANISOU 9171 HE3 LYS C 180 | 9500    | 5890   | 8780   | 130  | 460   | 730  | H0 |
| ATOM 9172 HZ1 LYS C 180   | -46.363 | 32.764 | 21.953 | 1.00 | 61.64 |      | H0 |
| ANISOU 9172 HZ1 LYS C 180 | 8960    | 5980   | 8480   | 300  | 440   | 790  | H0 |
| ATOM 9173 HZ2 LYS C 180   | -46.676 | 33.884 | 21.040 | 1.00 | 63.94 |      | H0 |
| ANISOU 9173 HZ2 LYS C 180 | 9450    | 6060   | 8790   | 350  | 350   | 950  | H0 |
| ATOM 9174 HZ3 LYS C 180   | -47.627 | 33.515 | 22.106 | 1.00 | 63.30 |      | H0 |
| ANISOU 9174 HZ3 LYS C 180 | 9230    | 6040   | 8780   | 570  | 380   | 800  | H0 |
| ATOM 9175 N ASN C 181     | -43.759 | 32.940 | 27.300 | 1.00 | 57.73 |      | N0 |
| ANISOU 9175 N ASN C 181   | 8490    | 5370   | 8070   | 30   | 720   | 140  | N0 |
| ATOM 9176 CA ASN C 181    | -42.539 | 33.782 | 27.394 | 1.00 | 58.05 |      | C0 |
| ANISOU 9176 CA ASN C 181  | 8700    | 5260   | 8090   | -190 | 720   | 140  | C0 |
| ATOM 9177 C ASN C 181     | -42.010 | 34.030 | 25.979 | 1.00 | 58.60 |      | C0 |
| ANISOU 9177 C ASN C 181   | 8840    | 5320   | 8110   | -340 | 670   | 310  | C0 |

|                            |         |        |        |       |       |      |    |
|----------------------------|---------|--------|--------|-------|-------|------|----|
| ATOM 9178 O ASN C 181      | -42.055 | 33.100 | 25.157 | 1.00  | 56.75 | O0   |    |
| ANISOU 9178 O ASN C 181    | 8460    | 5290   | 7810   | -350  | 680   | 390  | O0 |
| ATOM 9179 CB ASN C 181     | -41.465 | 33.140 | 28.272 | 1.00  | 56.61 | C0   |    |
| ANISOU 9179 CB ASN C 181   | 8420    | 5220   | 7860   | -360  | 780   | 20   | C0 |
| ATOM 9180 CG ASN C 181     | -41.862 | 33.065 | 29.732 | 1.00  | 56.37 | C0   |    |
| ANISOU 9180 CG ASN C 181   | 8360    | 5180   | 7880   | -240  | 820   | -150 | C0 |
| ATOM 9181 OD1 ASN C 181    | -42.099 | 34.091 | 30.369 | 1.00  | 58.35 | O0   |    |
| ANISOU 9181 OD1 ASN C 181  | 8770    | 5220   | 8180   | -180  | 810   | -220 | O0 |
| ATOM 9182 ND2 ASN C 181    | -41.928 | 31.860 | 30.272 | 1.00  | 54.06 | N0   |    |
| ANISOU 9182 ND2 ASN C 181  | 7880    | 5120   | 7550   | -220  | 860   | -230 | N0 |
| ATOM 9183 H ASN C 181      | -43.605 | 32.137 | 26.897 | 1.00  | 56.55 | H0   |    |
| ANISOU 9183 H ASN C 181    | 8230    | 5390   | 7870   | -20   | 730   | 170  | H0 |
| ATOM 9184 HA ASN C 181     | -42.784 | 34.647 | 27.798 | 1.00  | 59.56 | H0   |    |
| ANISOU 9184 HA ASN C 181   | 9030    | 5260   | 8340   | -130  | 700   | 110  | H0 |
| ATOM 9185 HB2 ASN C 181    | -41.285 | 32.237 | 27.941 | 1.00  | 55.30 | H0   |    |
| ANISOU 9185 HB2 ASN C 181  | 8120    | 5240   | 7650   | -390  | 800   | 40   | H0 |
| ATOM 9186 HB3 ASN C 181    | -40.639 | 33.660 | 28.193 | 1.00  | 57.41 | H0   |    |
| ANISOU 9186 HB3 ASN C 181  | 8620    | 5250   | 7940   | -510  | 780   | 30   | H0 |
| ATOM 9187 HD21 ASN C 181   | -41.824 | 31.765 | 31.154 | 1.00  | 53.96 | H0   |    |
| ANISOU 9187 HD21 ASN C 181 | 7850    | 5120   | 7540   | -220  | 890   | -330 | H0 |
| ATOM 9188 HD22 ASN C 181   | -42.079 | 31.148 | 29.753 | 1.00  | 53.23 | H0   |    |
| ANISOU 9188 HD22 ASN C 181 | 7670    | 5150   | 7410   | -200  | 860   | -180 | H0 |
| ATOM 9189 N SER C 182      | -41.557 | 35.254 | 25.717 | 1.00  | 60.96 | N0   |    |
| ANISOU 9189 N SER C 182    | 9370    | 5370   | 8420   | -450  | 630   | 380  | N0 |
| ATOM 9190 CA SER C 182     | -40.841 | 35.665 | 24.486 | 1.00  | 62.55 | C0   |    |
| ANISOU 9190 CA SER C 182   | 9680    | 5540   | 8540   | -660  | 600   | 540  | C0 |
| ATOM 9191 C SER C 182      | -39.496 | 36.253 | 24.916 | 1.00  | 63.88 | C0   |    |
| ANISOU 9191 C SER C 182    | 9960    | 5640   | 8670   | -930  | 630   | 500  | C0 |
| ATOM 9192 O SER C 182      | -39.503 | 37.343 | 25.508 | 1.00  | 66.29 | O0   |    |
| ANISOU 9192 O SER C 182    | 10470   | 5680   | 9040   | -930  | 600   | 460  | O0 |
| ATOM 9193 CB SER C 182     | -41.659 | 36.641 | 23.681 | 1.00  | 64.70 | C0   |    |
| ANISOU 9193 CB SER C 182   | 10150   | 5580   | 8860   | -540  | 500   | 680  | C0 |
| ATOM 9194 OG SER C 182     | -41.158 | 36.750 | 22.356 | 1.00  | 65.82 | O0   |    |
| ANISOU 9194 OG SER C 182   | 10340   | 5760   | 8910   | -720  | 470   | 860  | O0 |
| ATOM 9195 H SER C 182      | -41.662 | 35.950 | 26.296 | 1.00  | 62.09 | H0   |    |
| ANISOU 9195 H SER C 182    | 9630    | 5350   | 8610   | -410  | 620   | 320  | H0 |
| ATOM 9196 HA SER C 182     | -40.672 | 34.855 | 23.933 | 1.00  | 61.33 | H0   |    |
| ANISOU 9196 HA SER C 182   | 9380    | 5590   | 8330   | -700  | 620   | 580  | H0 |
| ATOM 9197 HB2 SER C 182    | -42.594 | 36.336 | 23.653 | 1.00  | 64.37 | H0   |    |
| ANISOU 9197 HB2 SER C 182  | 10030   | 5570   | 8860   | -340  | 490   | 680  | H0 |
| ATOM 9198 HB3 SER C 182    | -41.638 | 37.524 | 24.114 | 1.00  | 66.27 | H0   |    |
| ANISOU 9198 HB3 SER C 182  | 10510   | 5560   | 9100   | -540  | 480   | 660  | H0 |
| ATOM 9199 N VAL C 183      | -38.403 | 35.525 | 24.671 | 1.00  | 63.20 | N0   |    |
| ANISOU 9199 N VAL C 183    | 9730    | 5790   | 8490   | -1140 | 680   | 490  | N0 |
| ATOM 9200 CA VAL C 183     | -37.034 | 35.852 | 25.167 | 1.00  | 63.82 | C0   |    |
| ANISOU 9200 CA VAL C 183   | 9840    | 5890   | 8520   | -1420 | 720   | 430  | C0 |
| ATOM 9201 C VAL C 183      | -36.078 | 35.923 | 23.970 | 1.00  | 64.66 | C0   |    |
| ANISOU 9201 C VAL C 183    | 9950    | 6110   | 8510   | -1680 | 720   | 560  | C0 |
| ATOM 9202 O VAL C 183      | -36.117 | 35.014 | 23.117 | 1.00  | 62.90 | O0   |    |
| ANISOU 9202 O VAL C 183    | 9560    | 6110   | 8220   | -1660 | 740   | 620  | O0 |
| ATOM 9203 CB VAL C 183     | -36.556 | 34.823 | 26.212 | 1.00  | 62.12 | C0   |    |
| ANISOU 9203 CB VAL C 183   | 9410    | 5900   | 8290   | -1410 | 790   | 260  | C0 |
| ATOM 9204 CG1 VAL C 183    | -35.193 | 35.185 | 26.784 | 1.00  | 62.75 | C0   |    |
| ANISOU 9204 CG1 VAL C 183  | 9520    | 6010   | 8320   | -1680 | 820   | 180  | C0 |

|                            |         |        |        |       |       |      |    |
|----------------------------|---------|--------|--------|-------|-------|------|----|
| ATOM 9205 CG2 VAL C 183    | -37.572 | 34.636 | 27.334 | 1.00  | 61.42 |      | C0 |
| ANISOU 9205 CG2 VAL C 183  | 9300    | 5740   | 8300   | -1160 | 790   | 130  | C0 |
| ATOM 9206 H VAL C 183      | -38.428 | 34.763 | 24.172 | 1.00  | 61.99 |      | H0 |
| ANISOU 9206 H VAL C 183    | 9440    | 5820   | 8300   | -1130 | 700   | 520  | H0 |
| ATOM 9207 HA VAL C 183     | -37.062 | 36.729 | 25.590 | 1.00  | 65.27 |      | H0 |
| ANISOU 9207 HA VAL C 183   | 10190   | 5860   | 8740   | -1430 | 690   | 410  | H0 |
| ATOM 9208 HB VAL C 183     | -36.464 | 33.955 | 25.747 | 1.00  | 60.81 |      | H0 |
| ANISOU 9208 HB VAL C 183   | 9090    | 5940   | 8080   | -1400 | 800   | 280  | H0 |
| ATOM 9209 HG11 VAL C 183   | -34.506 | 35.030 | 26.112 | 1.00  | 62.93 |      | H0 |
| ANISOU 9209 HG11 VAL C 183 | 9490    | 6150   | 8270   | -1830 | 830   | 240  | H0 |
| ATOM 9210 HG12 VAL C 183   | -35.010 | 34.633 | 27.564 | 1.00  | 61.69 |      | H0 |
| ANISOU 9210 HG12 VAL C 183 | 9270    | 5980   | 8190   | -1640 | 850   | 70   | H0 |
| ATOM 9211 HG13 VAL C 183   | -35.188 | 36.122 | 27.043 | 1.00  | 64.29 |      | H0 |
| ANISOU 9211 HG13 VAL C 183 | 9890    | 5990   | 8550   | -1730 | 790   | 190  | H0 |
| ATOM 9212 HG21 VAL C 183   | -37.791 | 35.501 | 27.722 | 1.00  | 62.72 |      | H0 |
| ANISOU 9212 HG21 VAL C 183 | 9620    | 5700   | 8510   | -1130 | 770   | 110  | H0 |
| ATOM 9213 HG22 VAL C 183   | -37.195 | 34.060 | 28.022 | 1.00  | 60.33 |      | H0 |
| ANISOU 9213 HG22 VAL C 183 | 9050    | 5730   | 8150   | -1180 | 830   | 30   | H0 |
| ATOM 9214 HG23 VAL C 183   | -38.379 | 34.227 | 26.978 | 1.00  | 60.75 |      | H0 |
| ANISOU 9214 HG23 VAL C 183 | 9150    | 5700   | 8230   | -1000 | 780   | 170  | H0 |
| ATOM 9215 N THR C 184      | -35.269 | 36.983 | 23.913 | 1.00  | 67.00 |      | N0 |
| ANISOU 9215 N THR C 184    | 10440   | 6250   | 8770   | -1920 | 710   | 610  | N0 |
| ATOM 9216 CA THR C 184     | -34.089 | 37.113 | 23.021 | 1.00  | 68.47 |      | C0 |
| ANISOU 9216 CA THR C 184   | 10620   | 6570   | 8830   | -2240 | 730   | 700  | C0 |
| ATOM 9217 C THR C 184      | -32.858 | 36.662 | 23.811 | 1.00  | 68.42 |      | C0 |
| ANISOU 9217 C THR C 184    | 10450   | 6780   | 8770   | -2430 | 790   | 560  | C0 |
| ATOM 9218 O THR C 184      | -32.584 | 37.265 | 24.867 | 1.00  | 69.82 |      | O0 |
| ANISOU 9218 O THR C 184    | 10730   | 6800   | 8990   | -2480 | 790   | 460  | O0 |
| ATOM 9219 CB THR C 184     | -33.962 | 38.544 | 22.482 | 1.00  | 71.50 |      | C0 |
| ANISOU 9219 CB THR C 184   | 11310   | 6660   | 9190   | -2420 | 660   | 850  | C0 |
| ATOM 9220 OG1 THR C 184    | -35.045 | 38.751 | 21.575 | 1.00  | 71.91 |      | O0 |
| ANISOU 9220 OG1 THR C 184  | 11470   | 6580   | 9270   | -2240 | 590   | 990  | O0 |
| ATOM 9221 CG2 THR C 184    | -32.648 | 38.811 | 21.780 | 1.00  | 72.97 |      | C0 |
| ANISOU 9221 CG2 THR C 184  | 11500   | 6990   | 9240   | -2800 | 690   | 930  | C0 |
| ATOM 9222 H THR C 184      | -35.387 | 37.720 | 24.436 | 1.00  | 68.15 |      | H0 |
| ANISOU 9222 H THR C 184    | 10740   | 6190   | 8970   | -1920 | 680   | 580  | H0 |
| ATOM 9223 HA THR C 184     | -34.215 | 36.504 | 22.258 | 1.00  | 67.75 |      | H0 |
| ANISOU 9223 HA THR C 184   | 10410   | 6640   | 8690   | -2210 | 740   | 760  | H0 |
| ATOM 9224 HB THR C 184     | -34.053 | 39.171 | 23.239 | 1.00  | 72.29 |      | H0 |
| ANISOU 9224 HB THR C 184   | 11550   | 6560   | 9360   | -2400 | 640   | 780  | H0 |
| ATOM 9225 HG21 THR C 184   | -31.952 | 38.975 | 22.441 | 1.00  | 73.22 |      | H0 |
| ANISOU 9225 HG21 THR C 184 | 11520   | 7040   | 9260   | -2930 | 720   | 840  | H0 |
| ATOM 9226 HG22 THR C 184   | -32.739 | 39.592 | 21.206 | 1.00  | 74.73 |      | H0 |
| ANISOU 9226 HG22 THR C 184 | 11920   | 7040   | 9440   | -2890 | 640   | 1050 | H0 |
| ATOM 9227 HG23 THR C 184   | -32.406 | 38.038 | 21.238 | 1.00  | 71.89 |      | H0 |
| ANISOU 9227 HG23 THR C 184 | 11190   | 7100   | 9030   | -2820 | 730   | 940  | H0 |
| ATOM 9228 N TYR C 185      | -32.179 | 35.613 | 23.335 | 1.00  | 67.67 |      | N0 |
| ANISOU 9228 N TYR C 185    | 10110   | 7020   | 8580   | -2500 | 850   | 540  | N0 |
| ATOM 9229 CA TYR C 185     | -30.911 | 35.077 | 23.896 | 1.00  | 66.86 |      | C0 |
| ANISOU 9229 CA TYR C 185   | 9810    | 7180   | 8410   | -2670 | 910   | 420  | C0 |
| ATOM 9230 C TYR C 185      | -29.736 | 35.614 | 23.066 | 1.00  | 68.89 |      | C0 |
| ANISOU 9230 C TYR C 185    | 10100   | 7540   | 8540   | -3020 | 930   | 500  | C0 |
| ATOM 9231 O TYR C 185      | -29.978 | 36.140 | 21.962 | 1.00  | 69.72 |      | O0 |
| ANISOU 9231 O TYR C 185    | 10330   | 7560   | 8590   | -3100 | 900   | 670  | O0 |

|                           |         |        |        |       |       |     |    |
|---------------------------|---------|--------|--------|-------|-------|-----|----|
| ATOM 9232 CB TYR C 185    | -30.949 | 33.549 | 23.908 | 1.00  | 64.19 | C0  |    |
| ANISOU 9232 CB TYR C 185  | 9190    | 7140   | 8060   | -2510 | 950   | 330 | C0 |
| ATOM 9233 CG TYR C 185    | -32.135 | 32.940 | 24.611 | 1.00  | 62.31 | C0  |    |
| ANISOU 9233 CG TYR C 185  | 8920    | 6830   | 7930   | -2190 | 930   | 260 | C0 |
| ATOM 9234 CD1 TYR C 185   | -32.098 | 32.664 | 25.969 | 1.00  | 61.49 | C0  |    |
| ANISOU 9234 CD1 TYR C 185 | 8760    | 6710   | 7880   | -2110 | 940   | 110 | C0 |
| ATOM 9235 CD2 TYR C 185   | -33.289 | 32.609 | 23.917 | 1.00  | 61.50 | C0  |    |
| ANISOU 9235 CD2 TYR C 185 | 8830    | 6680   | 7860   | -1980 | 900   | 350 | C0 |
| ATOM 9236 CE1 TYR C 185   | -33.175 | 32.083 | 26.620 | 1.00  | 60.07 | C0  |    |
| ANISOU 9236 CE1 TYR C 185 | 8550    | 6490   | 7790   | -1840 | 930   | 40  | C0 |
| ATOM 9237 CE2 TYR C 185   | -34.376 | 32.031 | 24.553 | 1.00  | 59.79 | C0  |    |
| ANISOU 9237 CE2 TYR C 185 | 8560    | 6420   | 7730   | -1710 | 890   | 280 | C0 |
| ATOM 9238 CZ TYR C 185    | -34.320 | 31.764 | 25.910 | 1.00  | 59.22 | C0  |    |
| ANISOU 9238 CZ TYR C 185  | 8440    | 6350   | 7710   | -1650 | 900   | 130 | C0 |
| ATOM 9239 OH TYR C 185    | -35.384 | 31.194 | 26.548 | 1.00  | 57.49 | O0  |    |
| ANISOU 9239 OH TYR C 185  | 8170    | 6110   | 7560   | -1400 | 900   | 70  | O0 |
| ATOM 9240 H TYR C 185     | -32.457 | 35.139 | 22.608 | 1.00  | 66.89 | H0  |    |
| ANISOU 9240 H TYR C 185   | 9940    | 7030   | 8450   | -2440 | 850   | 600 | H0 |
| ATOM 9241 HA TYR C 185    | -30.812 | 35.400 | 24.827 | 1.00  | 67.07 | H0  |    |
| ANISOU 9241 HA TYR C 185  | 9890    | 7100   | 8490   | -2670 | 900   | 330 | H0 |
| ATOM 9242 HB2 TYR C 185   | -30.938 | 33.234 | 22.980 | 1.00  | 64.19 | H0  |    |
| ANISOU 9242 HB2 TYR C 185 | 9140    | 7250   | 8000   | -2530 | 960   | 410 | H0 |
| ATOM 9243 HB3 TYR C 185   | -30.131 | 33.226 | 24.340 | 1.00  | 64.04 | H0  |    |
| ANISOU 9243 HB3 TYR C 185 | 9050    | 7280   | 8000   | -2600 | 980   | 240 | H0 |
| ATOM 9244 HD1 TYR C 185   | -31.321 | 32.872 | 26.461 | 1.00  | 61.99 | H0  |    |
| ANISOU 9244 HD1 TYR C 185 | 8820    | 6810   | 7920   | -2240 | 950   | 40  | H0 |
| ATOM 9245 HD2 TYR C 185   | -33.336 | 32.782 | 22.991 | 1.00  | 62.13 | H0  |    |
| ANISOU 9245 HD2 TYR C 185 | 8940    | 6770   | 7890   | -2040 | 890   | 450 | H0 |
| ATOM 9246 HE1 TYR C 185   | -33.130 | 31.906 | 27.545 | 1.00  | 59.46 | H0  |    |
| ANISOU 9246 HE1 TYR C 185 | 8440    | 6410   | 7740   | -1800 | 940   | -60 | H0 |
| ATOM 9247 HE2 TYR C 185   | -35.153 | 31.817 | 24.062 | 1.00  | 59.53 | H0  |    |
| ANISOU 9247 HE2 TYR C 185 | 8530    | 6370   | 7720   | -1590 | 870   | 340 | H0 |
| ATOM 9248 N SER C 186     | -28.506 | 35.486 | 23.577 | 1.00  | 69.45 | N0  |    |
| ANISOU 9248 N SER C 186   | 10040   | 7800   | 8540   | -3230 | 970   | 400 | N0 |
| ATOM 9249 CA SER C 186    | -27.272 | 36.048 | 22.963 | 1.00  | 71.60 | C0  |    |
| ANISOU 9249 CA SER C 186  | 10320   | 8210   | 8680   | -3600 | 1000  | 460 | C0 |
| ATOM 9250 C SER C 186     | -26.975 | 35.364 | 21.621 | 1.00  | 71.19 | C0  |    |
| ANISOU 9250 C SER C 186   | 10100   | 8450   | 8510   | -3650 | 1040  | 550 | C0 |
| ATOM 9251 O SER C 186     | -26.492 | 36.059 | 20.713 | 1.00  | 73.14 | O0  |    |
| ANISOU 9251 O SER C 186   | 10440   | 8700   | 8650   | -3920 | 1050  | 680 | O0 |
| ATOM 9252 CB SER C 186    | -26.091 | 35.963 | 23.907 | 1.00  | 72.15 | C0  |    |
| ANISOU 9252 CB SER C 186  | 10250   | 8450   | 8710   | -3770 | 1030  | 320 | C0 |
| ATOM 9253 OG SER C 186    | -25.875 | 34.630 | 24.348 | 1.00  | 70.32 | O0  |    |
| ANISOU 9253 OG SER C 186  | 9730    | 8500   | 8490   | -3590 | 1070  | 180 | O0 |
| ATOM 9254 H SER C 186     | -28.334 | 35.035 | 24.351 | 1.00  | 68.41 | H0  |    |
| ANISOU 9254 H SER C 186   | 9800    | 7750   | 8440   | -3160 | 990   | 290 | H0 |
| ATOM 9255 HA SER C 186    | -27.444 | 37.011 | 22.778 | 1.00  | 73.22 | H0  |    |
| ANISOU 9255 HA SER C 186  | 10740   | 8180   | 8890   | -3700 | 960   | 550 | H0 |
| ATOM 9256 HB2 SER C 186   | -25.284 | 36.290 | 23.448 | 1.00  | 73.64 | H0  |    |
| ANISOU 9256 HB2 SER C 186 | 10420   | 8750   | 8810   | -4020 | 1060  | 360 | H0 |
| ATOM 9257 HB3 SER C 186   | -26.255 | 36.542 | 24.685 | 1.00  | 72.63 | H0  |    |
| ANISOU 9257 HB3 SER C 186 | 10450   | 8310   | 8840   | -3770 | 1010  | 270 | H0 |
| ATOM 9258 N CYS C 187     | -27.275 | 34.065 | 21.499 | 1.00  | 69.29 | N0  |    |
| ANISOU 9258 N CYS C 187   | 9630    | 8420   | 8280   | -3420 | 1070  | 480 | N0 |

|                           |         |        |        |       |       |      |    |
|---------------------------|---------|--------|--------|-------|-------|------|----|
| ATOM 9259 CA CYS C 187    | -27.016 | 33.224 | 20.295 | 1.00  | 69.20 | C0   |    |
| ANISOU 9259 CA CYS C 187  | 9430    | 8710   | 8150   | -3430 | 1110  | 530  | C0 |
| ATOM 9260 C CYS C 187     | -27.460 | 33.935 | 19.010 | 1.00  | 70.60 | C0   |    |
| ANISOU 9260 C CYS C 187   | 9790    | 8770   | 8260   | -3530 | 1090  | 730  | C0 |
| ATOM 9261 O CYS C 187     | -26.749 | 33.814 | 17.995 | 1.00  | 71.17 | O0   |    |
| ANISOU 9261 O CYS C 187   | 9770    | 9080   | 8190   | -3730 | 1130  | 790  | O0 |
| ATOM 9262 CB CYS C 187    | -27.739 | 31.880 | 20.373 | 1.00  | 67.55 | C0   |    |
| ANISOU 9262 CB CYS C 187  | 9050    | 8620   | 8000   | -3100 | 1110  | 450  | C0 |
| ATOM 9263 SG CYS C 187    | -29.536 | 31.968 | 20.123 | 1.00  | 67.05 | S0   |    |
| ANISOU 9263 SG CYS C 187  | 9170    | 8250   | 8050   | -2810 | 1040  | 560  | S0 |
| ATOM 9264 H CYS C 187     | -27.666 | 33.588 | 22.168 | 1.00  | 67.86 | H0   |    |
| ANISOU 9264 H CYS C 187   | 9390    | 8220   | 8170   | -3230 | 1060  | 400  | H0 |
| ATOM 9265 HA CYS C 187    | -26.047 | 33.056 | 20.243 | 1.00  | 69.89 | H0   |    |
| ANISOU 9265 HA CYS C 187  | 9380    | 9020   | 8150   | -3590 | 1150  | 480  | H0 |
| ATOM 9266 HB2 CYS C 187   | -27.365 | 31.282 | 19.694 | 1.00  | 67.32 | H0   |    |
| ANISOU 9266 HB2 CYS C 187 | 8880    | 8810   | 7880   | -3120 | 1140  | 450  | H0 |
| ATOM 9267 HB3 CYS C 187   | -27.568 | 31.476 | 21.247 | 1.00  | 66.53 | H0   |    |
| ANISOU 9267 HB3 CYS C 187 | 8840    | 8520   | 7920   | -3020 | 1110  | 330  | H0 |
| ATOM 9268 N CYS C 188     | -28.603 | 34.627 | 19.051 | 1.00  | 70.80 | N0   |    |
| ANISOU 9268 N CYS C 188   | 10060   | 8450   | 8390   | -3400 | 1010  | 830  | N0 |
| ATOM 9269 CA CYS C 188    | -29.466 | 34.892 | 17.871 | 1.00  | 71.46 | C0   |    |
| ANISOU 9269 CA CYS C 188  | 10290   | 8420   | 8450   | -3340 | 970   | 1010 | C0 |
| ATOM 9270 C CYS C 188     | -30.170 | 36.242 | 18.010 | 1.00  | 72.58 | C0   |    |
| ANISOU 9270 C CYS C 188   | 10770   | 8140   | 8670   | -3350 | 890   | 1130 | C0 |
| ATOM 9271 O CYS C 188     | -30.563 | 36.623 | 19.110 | 1.00  | 72.23 | O0   |    |
| ANISOU 9271 O CYS C 188   | 10820   | 7870   | 8750   | -3230 | 850   | 1050 | O0 |
| ATOM 9272 CB CYS C 188    | -30.479 | 33.760 | 17.749 | 1.00  | 69.87 | C0   |    |
| ANISOU 9272 CB CYS C 188  | 9950    | 8290   | 8310   | -3010 | 960   | 970  | C0 |
| ATOM 9273 SG CYS C 188    | -29.767 | 32.123 | 18.084 | 1.00  | 69.01 | S0   |    |
| ANISOU 9273 SG CYS C 188  | 9470    | 8590   | 8160   | -2920 | 1040  | 780  | S0 |
| ATOM 9274 H CYS C 188     | -28.947 | 34.981 | 19.816 | 1.00  | 70.66 | H0   |    |
| ANISOU 9274 H CYS C 188   | 10140   | 8240   | 8460   | -3320 | 990   | 790  | H0 |
| ATOM 9275 HA CYS C 188    | -28.900 | 34.902 | 17.066 | 1.00  | 72.46 | H0   |    |
| ANISOU 9275 HA CYS C 188  | 10370   | 8710   | 8450   | -3520 | 1000  | 1080 | H0 |
| ATOM 9276 HB2 CYS C 188   | -31.213 | 33.915 | 18.378 | 1.00  | 69.38 | H0   |    |
| ANISOU 9276 HB2 CYS C 188 | 9970    | 8040   | 8360   | -2830 | 920   | 950  | H0 |
| ATOM 9277 HB3 CYS C 188   | -30.852 | 33.759 | 16.844 | 1.00  | 70.38 | H0   |    |
| ANISOU 9277 HB3 CYS C 188 | 10050   | 8370   | 8320   | -3000 | 940   | 1080 | H0 |
| ATOM 9278 N PRO C 189     | -30.370 | 37.002 | 16.907 | 1.00  | 73.90 | N0   |    |
| ANISOU 9278 N PRO C 189   | 11130   | 8190   | 8760   | -3480 | 840   | 1330 | N0 |
| ATOM 9279 CA PRO C 189    | -31.002 | 38.321 | 16.984 | 1.00  | 75.46 | C0   |    |
| ANISOU 9279 CA PRO C 189  | 11670   | 7970   | 9030   | -3490 | 740   | 1450 | C0 |
| ATOM 9280 C PRO C 189     | -32.528 | 38.281 | 17.177 | 1.00  | 73.97 | C0   |    |
| ANISOU 9280 C PRO C 189   | 11570   | 7550   | 8990   | -3110 | 670   | 1470 | C0 |
| ATOM 9281 O PRO C 189     | -33.072 | 39.281 | 17.610 | 1.00  | 75.38 | O0   |    |
| ANISOU 9281 O PRO C 189   | 12010   | 7370   | 9260   | -3050 | 590   | 1510 | O0 |
| ATOM 9282 CB PRO C 189    | -30.661 | 38.951 | 15.625 | 1.00  | 77.66 | C0   |    |
| ANISOU 9282 CB PRO C 189  | 12090   | 8260   | 9150   | -3760 | 720   | 1660 | C0 |
| ATOM 9283 CG PRO C 189    | -30.569 | 37.770 | 14.685 | 1.00  | 76.34 | C0   |    |
| ANISOU 9283 CG PRO C 189  | 11660   | 8470   | 8880   | -3720 | 780   | 1670 | C0 |
| ATOM 9284 CD PRO C 189    | -30.015 | 36.635 | 15.526 | 1.00  | 74.27 | C0   |    |
| ANISOU 9284 CD PRO C 189  | 11080   | 8490   | 8640   | -3630 | 870   | 1450 | C0 |
| ATOM 9285 HA PRO C 189    | -30.580 | 38.848 | 17.708 | 1.00  | 76.15 | H0   |    |
| ANISOU 9285 HA PRO C 189  | 11840   | 7950   | 9150   | -3590 | 740   | 1390 | H0 |

|                           |         |        |        |       |          |    |
|---------------------------|---------|--------|--------|-------|----------|----|
| ATOM 9286 HB2 PRO C 189   | -31.363 | 39.573 | 15.338 | 1.00  | 78.77    | H0 |
| ANISOU 9286 HB2 PRO C 189 | 12440   | 8150   | 9330   | -3690 | 640 1780 | H0 |
| ATOM 9287 HB3 PRO C 189   | -29.807 | 39.433 | 15.666 | 1.00  | 79.18    | H0 |
| ANISOU 9287 HB3 PRO C 189 | 12340   | 8480   | 9270   | -4030 | 740 1670 | H0 |
| ATOM 9288 HG2 PRO C 189   | -31.452 | 37.540 | 14.331 | 1.00  | 75.70    | H0 |
| ANISOU 9288 HG2 PRO C 189 | 11600   | 8320   | 8840   | -3520 | 740 1720 | H0 |
| ATOM 9289 HG3 PRO C 189   | -29.971 | 37.969 | 13.936 | 1.00  | 77.75    | H0 |
| ANISOU 9289 HG3 PRO C 189 | 11850   | 8770   | 8920   | -3950 | 800 1760 | H0 |
| ATOM 9290 HD2 PRO C 189   | -30.421 | 35.784 | 15.276 | 1.00  | 72.69    | H0 |
| ANISOU 9290 HD2 PRO C 189 | 10740   | 8430   | 8450   | -3450 | 890 1410 | H0 |
| ATOM 9291 HD3 PRO C 189   | -29.048 | 36.565 | 15.422 | 1.00  | 74.88    | H0 |
| ANISOU 9291 HD3 PRO C 189 | 11060   | 8760   | 8620   | -3850 | 930 1410 | H0 |
| ATOM 9292 N GLU C 190     | -33.175 | 37.152 | 16.854 | 1.00  | 71.11    | N0 |
| ANISOU 9292 N GLU C 190   | 11000   | 7380   | 8640   | -2870 | 680 1440 | N0 |
| ATOM 9293 CA GLU C 190    | -34.656 | 36.999 | 16.888 | 1.00  | 69.68    | C0 |
| ANISOU 9293 CA GLU C 190  | 10860   | 7040   | 8580   | -2520 | 610 1460 | C0 |
| ATOM 9294 C GLU C 190     | -35.080 | 36.413 | 18.242 | 1.00  | 66.61    | C0 |
| ANISOU 9294 C GLU C 190   | 10340   | 6640   | 8320   | -2280 | 640 1270 | C0 |
| ATOM 9295 O GLU C 190     | -34.264 | 35.722 | 18.883 | 1.00  | 64.49    | O0 |
| ANISOU 9295 O GLU C 190   | 9880    | 6590   | 8030   | -2360 | 720 1120 | O0 |
| ATOM 9296 CB GLU C 190    | -35.160 | 36.114 | 15.744 | 1.00  | 69.27    | C0 |
| ANISOU 9296 CB GLU C 190  | 10670   | 7200   | 8450   | -2420 | 610 1550 | C0 |
| ATOM 9297 CG GLU C 190    | -34.549 | 36.427 | 14.385 | 1.00  | 71.72    | C0 |
| ANISOU 9297 CG GLU C 190  | 11040   | 7620   | 8590   | -2690 | 610 1720 | C0 |
| ATOM 9298 CD GLU C 190    | -33.379 | 35.541 | 13.977 | 1.00  | 71.71    | C0 |
| ANISOU 9298 CD GLU C 190  | 10800   | 8010   | 8440   | -2900 | 720 1650 | C0 |
| ATOM 9299 OE1 GLU C 190   | -32.856 | 34.803 | 14.846 | 1.00  | 69.99    | O0 |
| ANISOU 9299 OE1 GLU C 190 | 10380   | 7960   | 8260   | -2860 | 790 1470 | O0 |
| ATOM 9300 OE2 GLU C 190   | -32.984 | 35.593 | 12.788 | 1.00  | 73.43    | O0 |
| ANISOU 9300 OE2 GLU C 190 | 11020   | 8370   | 8510   | -3090 | 730 1780 | O0 |
| ATOM 9301 H GLU C 190     | -32.739 | 36.395 | 16.599 | 1.00  | 70.18    | H0 |
| ANISOU 9301 H GLU C 190   | 10700   | 7510   | 8450   | -2910 | 740 1390 | H0 |
| ATOM 9302 HA GLU C 190    | -35.061 | 37.892 | 16.795 | 1.00  | 71.28    | H0 |
| ANISOU 9302 HA GLU C 190  | 11280   | 6980   | 8820   | -2510 | 550 1550 | H0 |
| ATOM 9303 HB2 GLU C 190   | -34.976 | 35.178 | 15.969 | 1.00  | 67.56    | H0 |
| ANISOU 9303 HB2 GLU C 190 | 10250   | 7200   | 8230   | -2370 | 670 1440 | H0 |
| ATOM 9304 HB3 GLU C 190   | -36.133 | 36.217 | 15.680 | 1.00  | 69.19    | H0 |
| ANISOU 9304 HB3 GLU C 190 | 10720   | 7060   | 8510   | -2220 | 550 1590 | H0 |
| ATOM 9305 HG2 GLU C 190   | -35.247 | 36.347 | 13.701 | 1.00  | 71.84    | H0 |
| ANISOU 9305 HG2 GLU C 190 | 11090   | 7610   | 8590   | -2590 | 560 1820 | H0 |
| ATOM 9306 HG3 GLU C 190   | -34.244 | 37.359 | 14.384 | 1.00  | 73.56    | H0 |
| ANISOU 9306 HG3 GLU C 190 | 11470   | 7680   | 8810   | -2850 | 580 1790 | H0 |
| ATOM 9307 N ALA C 191     | -36.320 | 36.690 | 18.651 | 1.00  | 65.88    | N0 |
| ANISOU 9307 N ALA C 191   | 10350   | 6320   | 8360   | -2000 | 580 1260 | N0 |
| ATOM 9308 CA ALA C 191    | -36.940 | 36.184 | 19.896 | 1.00  | 63.79    | C0 |
| ANISOU 9308 CA ALA C 191  | 9980    | 6040   | 8220   | -1750 | 600 1090 | C0 |
| ATOM 9309 C ALA C 191     | -37.432 | 34.748 | 19.670 | 1.00  | 60.94    | C0 |
| ANISOU 9309 C ALA C 191   | 9350    | 5960   | 7840   | -1580 | 630 1040 | C0 |
| ATOM 9310 O ALA C 191     | -38.018 | 34.481 | 18.603 | 1.00  | 61.15    | O0 |
| ANISOU 9310 O ALA C 191   | 9360    | 6050   | 7830   | -1510 | 600 1160 | O0 |
| ATOM 9311 CB ALA C 191    | -38.067 | 37.095 | 20.319 | 1.00  | 64.96    | C0 |
| ANISOU 9311 CB ALA C 191  | 10330   | 5860   | 8490   | -1530 | 520 1110 | C0 |
| ATOM 9312 H ALA C 191     | -36.887 | 37.222 | 18.176 | 1.00  | 67.08    | H0 |
| ANISOU 9312 H ALA C 191   | 10640   | 6320   | 8530   | -1940 | 510 1370 | H0 |

|                           |         |        |        |       |          |    |
|---------------------------|---------|--------|--------|-------|----------|----|
| ATOM 9313 HA ALA C 191    | -36.256 | 36.174 | 20.606 | 1.00  | 63.53    | H0 |
| ANISOU 9313 HA ALA C 191  | 9910    | 6040   | 8180   | -1850 | 640 990  | H0 |
| ATOM 9314 HB1 ALA C 191   | -38.436 | 36.786 | 21.163 | 1.00  | 63.94    | H0 |
| ANISOU 9314 HB1 ALA C 191 | 10130   | 5730   | 8430   | -1380 | 540 990  | H0 |
| ATOM 9315 HB2 ALA C 191   | -37.730 | 38.000 | 20.426 | 1.00  | 66.66    | H0 |
| ANISOU 9315 HB2 ALA C 191 | 10730   | 5890   | 8710   | -1650 | 490 1140 | H0 |
| ATOM 9316 HB3 ALA C 191   | -38.763 | 37.088 | 19.640 | 1.00  | 65.24    | H0 |
| ANISOU 9316 HB3 ALA C 191 | 10390   | 5870   | 8530   | -1420 | 470 1210 | H0 |
| ATOM 9317 N TYR C 192     | -37.177 | 33.863 | 20.635 | 1.00  | 58.40    | N0 |
| ANISOU 9317 N TYR C 192   | 8840    | 5800   | 7550   | -1520 | 700 870  | N0 |
| ATOM 9318 CA TYR C 192    | -37.716 | 32.480 | 20.696 | 1.00  | 56.06    | C0 |
| ANISOU 9318 CA TYR C 192  | 8310    | 5730   | 7260   | -1340 | 720 800  | C0 |
| ATOM 9319 C TYR C 192     | -38.821 | 32.439 | 21.755 | 1.00  | 55.70    | C0 |
| ANISOU 9319 C TYR C 192   | 8270    | 5560   | 7340   | -1080 | 700 700  | C0 |
| ATOM 9320 O TYR C 192     | -38.632 | 33.025 | 22.845 | 1.00  | 56.34    | O0 |
| ANISOU 9320 O TYR C 192   | 8430    | 5500   | 7480   | -1080 | 720 610  | O0 |
| ATOM 9321 CB TYR C 192    | -36.596 | 31.478 | 20.987 | 1.00  | 54.35    | C0 |
| ANISOU 9321 CB TYR C 192  | 7890    | 5790   | 6970   | -1460 | 790 680  | C0 |
| ATOM 9322 CG TYR C 192    | -35.757 | 31.123 | 19.785 | 1.00  | 54.34    | C0 |
| ANISOU 9322 CG TYR C 192  | 7810    | 6000   | 6830   | -1650 | 820 760  | C0 |
| ATOM 9323 CD1 TYR C 192   | -34.863 | 32.031 | 19.242 | 1.00  | 56.07    | C0 |
| ANISOU 9323 CD1 TYR C 192 | 8150    | 6180   | 6970   | -1910 | 830 850  | C0 |
| ATOM 9324 CD2 TYR C 192   | -35.857 | 29.878 | 19.185 | 1.00  | 52.79    | C0 |
| ANISOU 9324 CD2 TYR C 192 | 7430    | 6050   | 6570   | -1580 | 840 740  | C0 |
| ATOM 9325 CE1 TYR C 192   | -34.089 | 31.711 | 18.137 | 1.00  | 56.58    | C0 |
| ANISOU 9325 CE1 TYR C 192 | 8130    | 6470   | 6900   | -2090 | 860 910  | C0 |
| ATOM 9326 CE2 TYR C 192   | -35.091 | 29.543 | 18.079 | 1.00  | 53.15    | C0 |
| ANISOU 9326 CE2 TYR C 192 | 7400    | 6310   | 6490   | -1740 | 870 800  | C0 |
| ATOM 9327 CZ TYR C 192    | -34.205 | 30.464 | 17.551 | 1.00  | 55.04    | C0 |
| ANISOU 9327 CZ TYR C 192  | 7740    | 6530   | 6640   | -1990 | 880 880  | C0 |
| ATOM 9328 OH TYR C 192    | -33.448 | 30.139 | 16.463 | 1.00  | 56.05    | O0 |
| ANISOU 9328 OH TYR C 192  | 7780    | 6890   | 6630   | -2160 | 920 930  | O0 |
| ATOM 9329 H TYR C 192     | -36.642 | 34.053 | 21.347 | 1.00  | 58.62    | H0 |
| ANISOU 9329 H TYR C 192   | 8880    | 5810   | 7590   | -1590 | 720 790  | H0 |
| ATOM 9330 HA TYR C 192    | -38.116 | 32.257 | 19.818 | 1.00  | 56.10    | H0 |
| ANISOU 9330 HA TYR C 192  | 8300    | 5790   | 7220   | -1300 | 700 890  | H0 |
| ATOM 9331 HB2 TYR C 192   | -36.013 | 31.855 | 21.680 | 1.00  | 54.73    | H0 |
| ANISOU 9331 HB2 TYR C 192 | 7980    | 5790   | 7030   | -1550 | 810 620  | H0 |
| ATOM 9332 HB3 TYR C 192   | -36.997 | 30.659 | 21.347 | 1.00  | 52.90    | H0 |
| ANISOU 9332 HB3 TYR C 192 | 7590    | 5700   | 6810   | -1330 | 800 610  | H0 |
| ATOM 9333 HD1 TYR C 192   | -34.777 | 32.884 | 19.633 | 1.00  | 57.25    | H0 |
| ANISOU 9333 HD1 TYR C 192 | 8440    | 6150   | 7160   | -1970 | 810 860  | H0 |
| ATOM 9334 HD2 TYR C 192   | -36.460 | 29.244 | 19.536 | 1.00  | 51.56    | H0 |
| ANISOU 9334 HD2 TYR C 192 | 7200    | 5930   | 6460   | -1420 | 830 690  | H0 |
| ATOM 9335 HE1 TYR C 192   | -33.486 | 32.344 | 17.783 | 1.00  | 58.02    | H0 |
| ANISOU 9335 HE1 TYR C 192 | 8390    | 6630   | 7020   | -2280 | 870 970  | H0 |
| ATOM 9336 HE2 TYR C 192   | -35.176 | 28.690 | 17.685 | 1.00  | 52.25    | H0 |
| ANISOU 9336 HE2 TYR C 192 | 7170    | 6350   | 6330   | -1680 | 880 780  | H0 |
| ATOM 9337 N GLU C 193     | -39.944 | 31.788 | 21.437 | 1.00  | 54.82    | N0 |
| ANISOU 9337 N GLU C 193   | 8060    | 5520   | 7250   | -870  | 680 730  | N0 |
| ATOM 9338 CA GLU C 193    | -41.125 | 31.694 | 22.335 | 1.00  | 54.58    | C0 |
| ANISOU 9338 CA GLU C 193  | 8010    | 5410   | 7330   | -620  | 660 650  | C0 |
| ATOM 9339 C GLU C 193     | -41.111 | 30.337 | 23.042 | 1.00  | 52.35    | C0 |
| ANISOU 9339 C GLU C 193   | 7510    | 5350   | 7030   | -560  | 720 520  | C0 |

|                           |         |        |        |      |       |      |    |
|---------------------------|---------|--------|--------|------|-------|------|----|
| ATOM 9340 O GLU C 193     | -40.611 | 29.358 | 22.451 | 1.00 | 51.63 | O0   |    |
| ANISOU 9340 O GLU C 193   | 7280    | 5470   | 6860   | -640 | 740   | 530  | O0 |
| ATOM 9341 CB GLU C 193    | -42.420 | 31.929 | 21.555 | 1.00 | 55.38 | C0   |    |
| ANISOU 9341 CB GLU C 193  | 8150    | 5440   | 7460   | -430 | 590   | 770  | C0 |
| ATOM 9342 CG GLU C 193    | -42.593 | 33.369 | 21.105 | 1.00 | 58.30 | C0   |    |
| ANISOU 9342 CG GLU C 193  | 8760    | 5530   | 7860   | -440 | 520   | 880  | C0 |
| ATOM 9343 CD GLU C 193    | -43.892 | 33.674 | 20.377 | 1.00 | 59.66 | C0   |    |
| ANISOU 9343 CD GLU C 193  | 8980    | 5620   | 8070   | -230 | 430   | 1000 | C0 |
| ATOM 9344 OE1 GLU C 193   | -44.768 | 32.787 | 20.355 | 1.00 | 58.07 | O0   |    |
| ANISOU 9344 OE1 GLU C 193 | 8600    | 5580   | 7880   | -60  | 430   | 970  | O0 |
| ATOM 9345 OE2 GLU C 193   | -44.029 | 34.804 | 19.841 | 1.00 | 62.00 | O0   |    |
| ANISOU 9345 OE2 GLU C 193 | 9490    | 5680   | 8380   | -230 | 360   | 1120 | O0 |
| ATOM 9346 H GLU C 193     | -40.052 | 31.356 | 20.642 | 1.00 | 54.58 | H0   |    |
| ANISOU 9346 H GLU C 193   | 7970    | 5600   | 7170   | -870 | 670   | 800  | H0 |
| ATOM 9347 HA GLU C 193    | -41.044 | 32.398 | 23.016 | 1.00 | 55.35 | H0   |    |
| ANISOU 9347 HA GLU C 193  | 8210    | 5350   | 7470   | -620 | 660   | 600  | H0 |
| ATOM 9348 HB2 GLU C 193   | -42.427 | 31.343 | 20.769 | 1.00 | 54.92 | H0   |    |
| ANISOU 9348 HB2 GLU C 193 | 8010    | 5520   | 7340   | -460 | 580   | 830  | H0 |
| ATOM 9349 HB3 GLU C 193   | -43.177 | 31.681 | 22.125 | 1.00 | 54.97 | H0   |    |
| ANISOU 9349 HB3 GLU C 193 | 8040    | 5390   | 7460   | -270 | 590   | 700  | H0 |
| ATOM 9350 HG2 GLU C 193   | -42.538 | 33.953 | 21.891 | 1.00 | 58.91 | H0   |    |
| ANISOU 9350 HG2 GLU C 193 | 8930    | 5460   | 8000   | -410 | 530   | 810  | H0 |
| ATOM 9351 HG3 GLU C 193   | -41.847 | 33.605 | 20.513 | 1.00 | 58.85 | H0   |    |
| ANISOU 9351 HG3 GLU C 193 | 8900    | 5600   | 7870   | -610 | 520   | 960  | H0 |
| ATOM 9352 N ASP C 194     | -41.617 | 30.301 | 24.275 | 1.00 | 52.13 | N0   |    |
| ANISOU 9352 N ASP C 194   | 7460    | 5270   | 7080   | -430 | 730   | 390  | N0 |
| ATOM 9353 CA ASP C 194    | -41.773 | 29.063 | 25.078 | 1.00 | 50.35 | C0   |    |
| ANISOU 9353 CA ASP C 194  | 7050    | 5230   | 6840   | -360 | 770   | 270  | C0 |
| ATOM 9354 C ASP C 194     | -43.032 | 29.177 | 25.941 | 1.00 | 50.23 | C0   |    |
| ANISOU 9354 C ASP C 194   | 7030    | 5150   | 6910   | -150 | 770   | 200  | C0 |
| ATOM 9355 O ASP C 194     | -43.417 | 30.304 | 26.298 | 1.00 | 50.95 | O0   |    |
| ANISOU 9355 O ASP C 194   | 7260    | 5030   | 7070   | -80  | 750   | 200  | O0 |
| ATOM 9356 CB ASP C 194    | -40.521 | 28.781 | 25.916 | 1.00 | 50.50 | C0   |    |
| ANISOU 9356 CB ASP C 194  | 7040    | 5320   | 6830   | -520 | 820   | 160  | C0 |
| ATOM 9357 CG ASP C 194    | -40.305 | 29.718 | 27.095 | 1.00 | 52.04 | C0   |    |
| ANISOU 9357 CG ASP C 194  | 7350    | 5340   | 7080   | -540 | 840   | 60   | C0 |
| ATOM 9358 OD1 ASP C 194   | -41.056 | 29.606 | 28.086 | 1.00 | 52.40 | O0   |    |
| ANISOU 9358 OD1 ASP C 194 | 7370    | 5360   | 7180   | -390 | 850   | -30  | O0 |
| ATOM 9359 OD2 ASP C 194   | -39.376 | 30.544 | 27.021 | 1.00 | 54.28 | O0   |    |
| ANISOU 9359 OD2 ASP C 194 | 7750    | 5520   | 7350   | -700 | 840   | 80   | O0 |
| ATOM 9360 H ASP C 194     | -41.899 | 31.053 | 24.707 | 1.00 | 53.08 | H0   |    |
| ANISOU 9360 H ASP C 194   | 7680    | 5230   | 7250   | -380 | 720   | 370  | H0 |
| ATOM 9361 HA ASP C 194    | -41.894 | 28.311 | 24.454 | 1.00 | 49.64 | H0   |    |
| ANISOU 9361 HA ASP C 194  | 6870    | 5280   | 6710   | -360 | 760   | 310  | H0 |
| ATOM 9362 HB2 ASP C 194   | -40.575 | 27.867 | 26.261 | 1.00 | 49.21 | H0   |    |
| ANISOU 9362 HB2 ASP C 194 | 6760    | 5290   | 6650   | -490 | 840   | 100  | H0 |
| ATOM 9363 HB3 ASP C 194   | -39.736 | 28.839 | 25.334 | 1.00 | 50.70 | H0   |    |
| ANISOU 9363 HB3 ASP C 194 | 7070    | 5390   | 6810   | -660 | 820   | 200  | H0 |
| ATOM 9364 N VAL C 195     | -43.646 | 28.036 | 26.255 | 1.00 | 49.02 | N0   |    |
| ANISOU 9364 N VAL C 195   | 6720    | 5170   | 6740   | -60  | 780   | 150  | N0 |
| ATOM 9365 CA VAL C 195    | -44.726 | 27.918 | 27.274 | 1.00 | 48.98 | C0   |    |
| ANISOU 9365 CA VAL C 195  | 6660    | 5160   | 6790   | 110  | 800   | 60   | C0 |
| ATOM 9366 C VAL C 195     | -44.090 | 27.320 | 28.531 | 1.00 | 47.80 | C0   |    |
| ANISOU 9366 C VAL C 195   | 6450    | 5090   | 6620   | 40   | 850   | -80  | C0 |



|                            |         |        |        |      |       |      |    |
|----------------------------|---------|--------|--------|------|-------|------|----|
| ATOM 9367 O VAL C 195      | -43.466 | 26.250 | 28.410 | 1.00 | 45.13 | O0   |    |
| ANISOU 9367 O VAL C 195    | 6020    | 4920   | 6220   | -50  | 850   | -90  | O0 |
| ATOM 9368 CB VAL C 195     | -45.905 | 27.074 | 26.752 | 1.00 | 48.89 | C0   |    |
| ANISOU 9368 CB VAL C 195   | 6510    | 5300   | 6760   | 240  | 770   | 110  | C0 |
| ATOM 9369 CG1 VAL C 195    | -46.910 | 26.744 | 27.848 | 1.00 | 48.73 | C0   |    |
| ANISOU 9369 CG1 VAL C 195  | 6400    | 5340   | 6770   | 380  | 800   | 10   | C0 |
| ATOM 9370 CG2 VAL C 195    | -46.598 | 27.761 | 25.584 | 1.00 | 50.41 | C0   |    |
| ANISOU 9370 CG2 VAL C 195  | 6760    | 5410   | 6980   | 330  | 710   | 250  | C0 |
| ATOM 9371 H VAL C 195      | -43.438 | 27.244 | 25.857 | 1.00 | 48.05 | H0   |    |
| ANISOU 9371 H VAL C 195    | 6510    | 5180   | 6570   | -100 | 780   | 170  | H0 |
| ATOM 9372 HA VAL C 195     | -45.053 | 28.810 | 27.484 | 1.00 | 50.26 | H0   |    |
| ANISOU 9372 HA VAL C 195   | 6910    | 5180   | 7010   | 180  | 790   | 60   | H0 |
| ATOM 9373 HB VAL C 195     | -45.532 | 26.220 | 26.420 | 1.00 | 47.76 | H0   |    |
| ANISOU 9373 HB VAL C 195   | 6300    | 5280   | 6570   | 170  | 770   | 130  | H0 |
| ATOM 9374 HG11 VAL C 195   | -46.562 | 26.024 | 28.403 | 1.00 | 47.69 | H0   |    |
| ANISOU 9374 HG11 VAL C 195 | 6210    | 5300   | 6610   | 320  | 820   | -60  | H0 |
| ATOM 9375 HG12 VAL C 195   | -47.750 | 26.464 | 27.446 | 1.00 | 48.78 | H0   |    |
| ANISOU 9375 HG12 VAL C 195 | 6340    | 5410   | 6780   | 470  | 770   | 50   | H0 |
| ATOM 9376 HG13 VAL C 195   | -47.061 | 27.532 | 28.398 | 1.00 | 49.69 | H0   |    |
| ANISOU 9376 HG13 VAL C 195 | 6590    | 5340   | 6940   | 440  | 810   | -40  | H0 |
| ATOM 9377 HG21 VAL C 195   | -46.948 | 28.622 | 25.874 | 1.00 | 51.53 | H0   |    |
| ANISOU 9377 HG21 VAL C 195 | 6990    | 5410   | 7180   | 420  | 700   | 240  | H0 |
| ATOM 9378 HG22 VAL C 195   | -47.331 | 27.205 | 25.267 | 1.00 | 49.98 | H0   |    |
| ANISOU 9378 HG22 VAL C 195 | 6620    | 5460   | 6910   | 410  | 690   | 280  | H0 |
| ATOM 9379 HG23 VAL C 195   | -45.960 | 27.898 | 24.862 | 1.00 | 50.46 | H0   |    |
| ANISOU 9379 HG23 VAL C 195 | 6820    | 5390   | 6960   | 230  | 690   | 320  | H0 |
| ATOM 9380 N GLU C 196      | -44.182 | 28.032 | 29.661 | 1.00 | 49.00 | N0   |    |
| ANISOU 9380 N GLU C 196    | 6670    | 5130   | 6820   | 80   | 870   | -180 | N0 |
| ATOM 9381 CA GLU C 196     | -43.785 | 27.537 | 31.005 | 1.00 | 48.69 | C0   |    |
| ANISOU 9381 CA GLU C 196   | 6590    | 5160   | 6760   | 40   | 920   | -320 | C0 |
| ATOM 9382 C GLU C 196      | -45.031 | 26.998 | 31.706 | 1.00 | 47.77 | C0   |    |
| ANISOU 9382 C GLU C 196    | 6370    | 5140   | 6650   | 190  | 940   | -380 | C0 |
| ATOM 9383 O GLU C 196      | -45.969 | 27.785 | 31.941 | 1.00 | 48.27 | O0   |    |
| ANISOU 9383 O GLU C 196    | 6470    | 5100   | 6770   | 340  | 940   | -410 | O0 |
| ATOM 9384 CB GLU C 196     | -43.149 | 28.631 | 31.864 | 1.00 | 51.10 | C0   |    |
| ANISOU 9384 CB GLU C 196   | 7030    | 5290   | 7090   | -20  | 940   | -410 | C0 |
| ATOM 9385 CG GLU C 196     | -42.802 | 28.155 | 33.268 | 1.00 | 51.46 | C0   |    |
| ANISOU 9385 CG GLU C 196   | 7030    | 5410   | 7110   | -70  | 980   | -550 | C0 |
| ATOM 9386 CD GLU C 196     | -41.960 | 29.121 | 34.084 | 1.00 | 53.86 | C0   |    |
| ANISOU 9386 CD GLU C 196   | 7470    | 5570   | 7430   | -170 | 1000  | -640 | C0 |
| ATOM 9387 OE1 GLU C 196    | -42.390 | 30.278 | 34.261 | 1.00 | 56.68 | O0   |    |
| ANISOU 9387 OE1 GLU C 196  | 7960    | 5730   | 7840   | -90  | 1000  | -670 | O0 |
| ATOM 9388 OE2 GLU C 196    | -40.867 | 28.715 | 34.529 | 1.00 | 54.72 | O0   |    |
| ANISOU 9388 OE2 GLU C 196  | 7550    | 5760   | 7480   | -320 | 1000  | -690 | O0 |
| ATOM 9389 H GLU C 196      | -44.501 | 28.885 | 29.672 | 1.00 | 50.20 | H0   |    |
| ANISOU 9389 H GLU C 196    | 6920    | 5140   | 7020   | 140  | 860   | -180 | H0 |
| ATOM 9390 HA GLU C 196     | -43.138 | 26.806 | 30.892 | 1.00 | 47.70 | H0   |    |
| ANISOU 9390 HA GLU C 196   | 6400    | 5140   | 6580   | -60  | 920   | -320 | H0 |
| ATOM 9391 HB2 GLU C 196    | -42.333 | 28.945 | 31.421 | 1.00 | 51.30 | H0   |    |
| ANISOU 9391 HB2 GLU C 196  | 7120    | 5270   | 7110   | -140 | 930   | -370 | H0 |
| ATOM 9392 HB3 GLU C 196    | -43.771 | 29.385 | 31.925 | 1.00 | 52.17 | H0   |    |
| ANISOU 9392 HB3 GLU C 196  | 7240    | 5300   | 7280   | 80   | 930   | -410 | H0 |
| ATOM 9393 HG2 GLU C 196    | -43.633 | 27.985 | 33.760 | 1.00 | 51.54 | H0   |    |
| ANISOU 9393 HG2 GLU C 196  | 7000    | 5460   | 7130   | 40   | 1000  | -600 | H0 |

|                            |         |        |        |      |       |       |    |
|----------------------------|---------|--------|--------|------|-------|-------|----|
| ATOM 9394 HG3 GLU C 196    | -42.320 | 27.304 | 33.203 | 1.00 | 50.41 |       | H0 |
| ANISOU 9394 HG3 GLU C 196  | 6820    | 5410   | 6930   | -140 | 980   | -550  | H0 |
| ATOM 9395 N VAL C 197      | -45.026 | 25.699 | 32.009 | 1.00 | 46.28 |       | N0 |
| ANISOU 9395 N VAL C 197    | 6050    | 5140   | 6400   | 150  | 940   | -410  | N0 |
| ATOM 9396 CA VAL C 197     | -46.088 | 25.003 | 32.786 | 1.00 | 45.12 |       | C0 |
| ANISOU 9396 CA VAL C 197   | 5800    | 5110   | 6230   | 250  | 970   | -470  | C0 |
| ATOM 9397 C VAL C 197      | -45.596 | 24.870 | 34.229 | 1.00 | 44.23 |       | C0 |
| ANISOU 9397 C VAL C 197    | 5700    | 5020   | 6090   | 180  | 1010  | -600  | C0 |
| ATOM 9398 O VAL C 197      | -44.577 | 24.196 | 34.449 | 1.00 | 42.56 |       | O0 |
| ANISOU 9398 O VAL C 197    | 5480    | 4870   | 5820   | 60   | 1000  | -620  | O0 |
| ATOM 9399 CB VAL C 197     | -46.427 | 23.638 | 32.163 | 1.00 | 44.32 |       | C0 |
| ANISOU 9399 CB VAL C 197   | 5570    | 5200   | 6070   | 230  | 940   | -400  | C0 |
| ATOM 9400 CG1 VAL C 197    | -47.569 | 22.949 | 32.895 | 1.00 | 43.99 |       | C0 |
| ANISOU 9400 CG1 VAL C 197  | 5430    | 5290   | 6000   | 300  | 960   | -450  | C0 |
| ATOM 9401 CG2 VAL C 197    | -46.745 | 23.774 | 30.679 | 1.00 | 44.91 |       | C0 |
| ANISOU 9401 CG2 VAL C 197  | 5640    | 5260   | 6160   | 270  | 890   | -270  | C0 |
| ATOM 9402 H VAL C 197      | -44.353 | 25.142 | 31.750 | 1.00 | 45.30 |       | H0 |
| ANISOU 9402 H VAL C 197    | 5900    | 5080   | 6230   | 60   | 930   | -390  | H0 |
| ATOM 9403 HA VAL C 197     | -46.889 | 25.555 | 32.778 | 1.00 | 46.14 |       | H0 |
| ANISOU 9403 HA VAL C 197   | 5930    | 5200   | 6400   | 360  | 970   | -470  | H0 |
| ATOM 9404 HB VAL C 197     | -45.625 | 23.065 | 32.248 | 1.00 | 43.43 |       | H0 |
| ANISOU 9404 HB VAL C 197   | 5460    | 5130   | 5920   | 130  | 930   | -410  | H0 |
| ATOM 9405 HG11 VAL C 197   | -47.267 | 22.663 | 33.775 | 1.00 | 43.76 |       | H0 |
| ANISOU 9405 HG11 VAL C 197 | 5400    | 5290   | 5940   | 250  | 980   | -520  | H0 |
| ATOM 9406 HG12 VAL C 197   | -47.861 | 22.172 | 32.387 | 1.00 | 43.44 |       | H0 |
| ANISOU 9406 HG12 VAL C 197 | 5290    | 5320   | 5900   | 290  | 930   | -400  | H0 |
| ATOM 9407 HG13 VAL C 197   | -48.312 | 23.568 | 32.994 | 1.00 | 45.01 |       | H0 |
| ANISOU 9407 HG13 VAL C 197 | 5550    | 5380   | 6170   | 400  | 970   | -460  | H0 |
| ATOM 9408 HG21 VAL C 197   | -47.358 | 24.518 | 30.545 | 1.00 | 45.80 |       | H0 |
| ANISOU 9408 HG21 VAL C 197 | 5780    | 5300   | 6320   | 360  | 890   | -260  | H0 |
| ATOM 9409 HG22 VAL C 197   | -47.157 | 22.955 | 30.357 | 1.00 | 44.17 |       | H0 |
| ANISOU 9409 HG22 VAL C 197 | 5470    | 5280   | 6030   | 270  | 870   | -240  | H0 |
| ATOM 9410 HG23 VAL C 197   | -45.924 | 23.939 | 30.184 | 1.00 | 44.67 |       | H0 |
| ANISOU 9410 HG23 VAL C 197 | 5660    | 5180   | 6130   | 190  | 880   | -240  | H0 |
| ATOM 9411 N SER C 198      | -46.296 | 25.515 | 35.163 | 1.00 | 44.72 |       | N0 |
| ANISOU 9411 N SER C 198    | 5780    | 5030   | 6180   | 280  | 1050  | -700  | N0 |
| ATOM 9412 CA SER C 198     | -46.044 | 25.438 | 36.623 | 1.00 | 44.13 |       | C0 |
| ANISOU 9412 CA SER C 198   | 5720    | 4990   | 6060   | 240  | 1090  | -830  | C0 |
| ATOM 9413 C SER C 198      | -46.976 | 24.384 | 37.225 | 1.00 | 42.94 |       | C0 |
| ANISOU 9413 C SER C 198    | 5440    | 5030   | 5850   | 270  | 1110  | -860  | C0 |
| ATOM 9414 O SER C 198      | -48.193 | 24.637 | 37.294 | 1.00 | 43.52 |       | O0 |
| ANISOU 9414 O SER C 198    | 5450    | 5150   | 5940   | 410  | 1140  | -880  | O0 |
| ATOM 9415 CB SER C 198     | -46.210 | 26.789 | 37.274 | 1.00 | 45.72 |       | C0 |
| ANISOU 9415 CB SER C 198   | 6030    | 5020   | 6320   | 310  | 1130  | -930  | C0 |
| ATOM 9416 OG SER C 198     | -45.301 | 27.729 | 36.713 | 1.00 | 46.35 |       | O0 |
| ANISOU 9416 OG SER C 198   | 6250    | 4910   | 6450   | 250  | 1100  | -890  | O0 |
| ATOM 9417 H SER C 198      | -46.997 | 26.063 | 34.966 | 1.00 | 45.58 |       | H0 |
| ANISOU 9417 H SER C 198    | 5900    | 5090   | 6330   | 390  | 1050  | -690  | H0 |
| ATOM 9418 HA SER C 198     | -45.105 | 25.139 | 36.759 | 1.00 | 43.46 |       | H0 |
| ANISOU 9418 HA SER C 198   | 5660    | 4910   | 5950   | 120  | 1080  | -840  | H0 |
| ATOM 9419 HB2 SER C 198    | -47.133 | 27.104 | 37.143 | 1.00 | 46.52 |       | H0 |
| ANISOU 9419 HB2 SER C 198  | 6110    | 5120   | 6450   | 440  | 1140  | -930  | H0 |
| ATOM 9420 HB3 SER C 198    | -46.047 | 26.709 | 38.241 | 1.00 | 45.81 |       | H0 |
| ANISOU 9420 HB3 SER C 198  | 6050    | 5060   | 6300   | 280  | 1160  | -1020 | H0 |

|                            |         |        |        |      |       |       |    |
|----------------------------|---------|--------|--------|------|-------|-------|----|
| ATOM 9421 N LEU C 199      | -46.418 | 23.234 | 37.604 | 1.00 | 41.42 |       | N0 |
| ANISOU 9421 N LEU C 199    | 5200    | 4960   | 5580   | 150  | 1090  | -860  | N0 |
| ATOM 9422 CA LEU C 199     | -47.150 | 22.129 | 38.278 | 1.00 | 40.73 |       | C0 |
| ANISOU 9422 CA LEU C 199   | 5010    | 5050   | 5410   | 140  | 1100  | -880  | C0 |
| ATOM 9423 C LEU C 199      | -46.981 | 22.292 | 39.792 | 1.00 | 40.73 |       | C0 |
| ANISOU 9423 C LEU C 199    | 5050    | 5070   | 5360   | 90   | 1150  | -1010 | C0 |
| ATOM 9424 O LEU C 199      | -45.861 | 22.049 | 40.287 | 1.00 | 40.45 |       | O0 |
| ANISOU 9424 O LEU C 199    | 5070    | 5010   | 5290   | -20  | 1130  | -1040 | O0 |
| ATOM 9425 CB LEU C 199     | -46.582 | 20.793 | 37.784 | 1.00 | 39.87 |       | C0 |
| ANISOU 9425 CB LEU C 199   | 4870    | 5030   | 5240   | 30   | 1040  | -810  | C0 |
| ATOM 9426 CG LEU C 199     | -47.172 | 19.540 | 38.429 | 1.00 | 39.84 |       | C0 |
| ANISOU 9426 CG LEU C 199   | 4800    | 5200   | 5140   | -20  | 1030  | -810  | C0 |
| ATOM 9427 CD1 LEU C 199    | -48.646 | 19.398 | 38.091 | 1.00 | 40.45 |       | C0 |
| ANISOU 9427 CD1 LEU C 199  | 4780    | 5380   | 5220   | 60   | 1050  | -770  | C0 |
| ATOM 9428 CD2 LEU C 199    | -46.405 | 18.300 | 38.005 | 1.00 | 38.63 |       | C0 |
| ANISOU 9428 CD2 LEU C 199  | 4650    | 5090   | 4940   | -120 | 960   | -750  | C0 |
| ATOM 9429 H LEU C 199      | -45.535 | 23.055 | 37.471 | 1.00 | 40.89 |       | H0 |
| ANISOU 9429 H LEU C 199    | 5170    | 4870   | 5500   | 70   | 1070  | -850  | H0 |
| ATOM 9430 HA LEU C 199     | -48.105 | 22.192 | 38.048 | 1.00 | 41.25 |       | H0 |
| ANISOU 9430 HA LEU C 199   | 5020    | 5160   | 5490   | 220  | 1120  | -870  | H0 |
| ATOM 9431 HB2 LEU C 199    | -46.725 | 20.739 | 36.818 | 1.00 | 39.60 |       | H0 |
| ANISOU 9431 HB2 LEU C 199  | 4820    | 4990   | 5240   | 60   | 1020  | -730  | H0 |
| ATOM 9432 HB3 LEU C 199    | -45.617 | 20.794 | 37.938 | 1.00 | 39.48 |       | H0 |
| ANISOU 9432 HB3 LEU C 199  | 4870    | 4940   | 5190   | -40  | 1020  | -820  | H0 |
| ATOM 9433 HG LEU C 199     | -47.090 | 19.629 | 39.411 | 1.00 | 40.12 |       | H0 |
| ANISOU 9433 HG LEU C 199   | 4850    | 5250   | 5140   | -50  | 1060  | -880  | H0 |
| ATOM 9434 HD11 LEU C 199   | -49.156 | 20.074 | 38.570 | 1.00 | 41.34 |       | H0 |
| ANISOU 9434 HD11 LEU C 199 | 4880    | 5480   | 5350   | 130  | 1100  | -830  | H0 |
| ATOM 9435 HD12 LEU C 199   | -48.956 | 18.514 | 38.352 | 1.00 | 40.11 |       | H0 |
| ANISOU 9435 HD12 LEU C 199 | 4690    | 5440   | 5110   | 10   | 1040  | -760  | H0 |
| ATOM 9436 HD13 LEU C 199   | -48.772 | 19.516 | 37.134 | 1.00 | 40.30 |       | H0 |
| ANISOU 9436 HD13 LEU C 199 | 4740    | 5330   | 5240   | 110  | 1030  | -710  | H0 |
| ATOM 9437 HD21 LEU C 199   | -46.456 | 18.202 | 37.038 | 1.00 | 38.32 |       | H0 |
| ANISOU 9437 HD21 LEU C 199 | 4600    | 5040   | 4930   | -90  | 930   | -680  | H0 |
| ATOM 9438 HD22 LEU C 199   | -46.792 | 17.516 | 38.431 | 1.00 | 38.47 |       | H0 |
| ANISOU 9438 HD22 LEU C 199 | 4610    | 5150   | 4860   | -160 | 940   | -750  | H0 |
| ATOM 9439 HD23 LEU C 199   | -45.473 | 18.387 | 38.273 | 1.00 | 38.41 |       | H0 |
| ANISOU 9439 HD23 LEU C 199 | 4670    | 5010   | 4910   | -170 | 940   | -780  | H0 |
| ATOM 9440 N ASN C 200      | -48.037 | 22.726 | 40.484 | 1.00 | 41.26 |       | N0 |
| ANISOU 9440 N ASN C 200    | 5070    | 5190   | 5420   | 190  | 1210  | -1090 | N0 |
| ATOM 9441 CA ASN C 200     | -48.112 | 22.779 | 41.970 | 1.00 | 41.83 |       | C0 |
| ANISOU 9441 CA ASN C 200   | 5160    | 5320   | 5420   | 150  | 1270  | -1220 | C0 |
| ATOM 9442 C ASN C 200      | -48.712 | 21.453 | 42.439 | 1.00 | 40.92 |       | C0 |
| ANISOU 9442 C ASN C 200    | 4940    | 5410   | 5190   | 80   | 1260  | -1200 | C0 |
| ATOM 9443 O ASN C 200      | -49.872 | 21.179 | 42.083 | 1.00 | 40.65 |       | O0 |
| ANISOU 9443 O ASN C 200    | 4800    | 5490   | 5150   | 150  | 1280  | -1160 | O0 |
| ATOM 9444 CB ASN C 200     | -48.928 | 23.980 | 42.458 | 1.00 | 43.73 |       | C0 |
| ANISOU 9444 CB ASN C 200   | 5410    | 5510   | 5700   | 300  | 1340  | -1330 | C0 |
| ATOM 9445 CG ASN C 200     | -48.896 | 24.182 | 43.961 | 1.00 | 44.68 |       | C0 |
| ANISOU 9445 CG ASN C 200   | 5560    | 5680   | 5740   | 260  | 1400  | -1480 | C0 |
| ATOM 9446 OD1 ASN C 200    | -48.005 | 23.691 | 44.658 | 1.00 | 44.11 |       | O0 |
| ANISOU 9446 OD1 ASN C 200  | 5530    | 5620   | 5600   | 110  | 1380  | -1500 | O0 |
| ATOM 9447 ND2 ASN C 200    | -49.863 | 24.926 | 44.468 | 1.00 | 46.14 |       | N0 |
| ANISOU 9447 ND2 ASN C 200  | 5710    | 5890   | 5940   | 400  | 1470  | -1590 | N0 |

|                            |         |        |        |      |       |       |    |
|----------------------------|---------|--------|--------|------|-------|-------|----|
| ATOM 9448 H ASN C 200      | -48.794 | 23.026 | 40.075 | 1.00 | 41.94 | H0    |    |
| ANISOU 9448 H ASN C 200    | 5120    | 5280   | 5540   | 280  | 1230  | -1070 | H0 |
| ATOM 9449 HA ASN C 200     | -47.201 | 22.865 | 42.327 | 1.00 | 41.54 | H0    |    |
| ANISOU 9449 HA ASN C 200   | 5190    | 5220   | 5370   | 70   | 1250  | -1250 | H0 |
| ATOM 9450 HB2 ASN C 200    | -48.584 | 24.787 | 42.024 | 1.00 | 44.12 | H0    |    |
| ANISOU 9450 HB2 ASN C 200  | 5530    | 5410   | 5820   | 350  | 1330  | -1330 | H0 |
| ATOM 9451 HB3 ASN C 200    | -49.858 | 23.861 | 42.176 | 1.00 | 44.11 | H0    |    |
| ANISOU 9451 HB3 ASN C 200  | 5370    | 5640   | 5750   | 380  | 1360  | -1310 | H0 |
| ATOM 9452 HD21 ASN C 200   | -49.968 | 24.976 | 45.345 | 1.00 | 46.80 | H0    |    |
| ANISOU 9452 HD21 ASN C 200 | 5790    | 6030   | 5960   | 380  | 1510  | -1680 | H0 |
| ATOM 9453 HD22 ASN C 200   | -50.405 | 25.374 | 43.933 | 1.00 | 46.79 | H0    |    |
| ANISOU 9453 HD22 ASN C 200 | 5770    | 5930   | 6080   | 510  | 1480  | -1570 | H0 |
| ATOM 9454 N PHE C 201      | -47.938 | 20.642 | 43.163 | 1.00 | 39.82 | N0    |    |
| ANISOU 9454 N PHE C 201    | 4840    | 5320   | 4970   | -60  | 1230  | -1210 | N0 |
| ATOM 9455 CA PHE C 201     | -48.309 | 19.247 | 43.511 | 1.00 | 39.21 | C0    |    |
| ANISOU 9455 CA PHE C 201   | 4710    | 5410   | 4780   | -170 | 1200  | -1160 | C0 |
| ATOM 9456 C PHE C 201      | -47.653 | 18.865 | 44.837 | 1.00 | 39.47 | C0    |    |
| ANISOU 9456 C PHE C 201    | 4810    | 5480   | 4710   | -290 | 1200  | -1230 | C0 |
| ATOM 9457 O PHE C 201      | -46.654 | 19.506 | 45.198 | 1.00 | 38.93 | O0    |    |
| ANISOU 9457 O PHE C 201    | 4820    | 5300   | 4670   | -310 | 1190  | -1290 | O0 |
| ATOM 9458 CB PHE C 201     | -47.887 | 18.297 | 42.384 | 1.00 | 37.27 | C0    |    |
| ANISOU 9458 CB PHE C 201   | 4460    | 5150   | 4550   | -210 | 1110  | -1030 | C0 |
| ATOM 9459 CG PHE C 201     | -46.431 | 17.908 | 42.409 | 1.00 | 35.73 | C0    |    |
| ANISOU 9459 CG PHE C 201   | 4350    | 4880   | 4340   | -300 | 1040  | -1020 | C0 |
| ATOM 9460 CD1 PHE C 201    | -45.461 | 18.739 | 41.872 | 1.00 | 35.66 | C0    |    |
| ANISOU 9460 CD1 PHE C 201  | 4390    | 4730   | 4420   | -270 | 1030  | -1030 | C0 |
| ATOM 9461 CD2 PHE C 201    | -46.028 | 16.717 | 42.990 | 1.00 | 35.00 | C0    |    |
| ANISOU 9461 CD2 PHE C 201  | 4290    | 4860   | 4150   | -410 | 980   | -1000 | C0 |
| ATOM 9462 CE1 PHE C 201    | -44.119 | 18.389 | 41.917 | 1.00 | 34.91 | C0    |    |
| ANISOU 9462 CE1 PHE C 201  | 4350    | 4600   | 4310   | -350 | 970   | -1030 | C0 |
| ATOM 9463 CE2 PHE C 201    | -44.689 | 16.355 | 43.014 | 1.00 | 34.39 | C0    |    |
| ANISOU 9463 CE2 PHE C 201  | 4270    | 4730   | 4070   | -460 | 900   | -1000 | C0 |
| ATOM 9464 CZ PHE C 201     | -43.735 | 17.193 | 42.479 | 1.00 | 34.25 | C0    |    |
| ANISOU 9464 CZ PHE C 201   | 4280    | 4600   | 4130   | -430 | 900   | -1010 | C0 |
| ATOM 9465 H PHE C 201      | -47.124 | 20.885 | 43.494 | 1.00 | 39.80 | H0    |    |
| ANISOU 9465 H PHE C 201    | 4910    | 5250   | 4960   | -110 | 1220  | -1240 | H0 |
| ATOM 9466 HA PHE C 201     | -49.292 | 19.196 | 43.620 | 1.00 | 39.75 | H0    |    |
| ANISOU 9466 HA PHE C 201   | 4710    | 5580   | 4820   | -130 | 1240  | -1170 | H0 |
| ATOM 9467 HB2 PHE C 201    | -48.432 | 17.485 | 42.443 | 1.00 | 37.13 | H0    |    |
| ANISOU 9467 HB2 PHE C 201  | 4400    | 5240   | 4470   | -250 | 1100  | -990  | H0 |
| ATOM 9468 HB3 PHE C 201    | -48.084 | 18.728 | 41.527 | 1.00 | 37.24 | H0    |    |
| ANISOU 9468 HB3 PHE C 201  | 4440    | 5100   | 4610   | -130 | 1110  | -990  | H0 |
| ATOM 9469 HD1 PHE C 201    | -45.717 | 19.561 | 41.484 | 1.00 | 36.06 | H0    |    |
| ANISOU 9469 HD1 PHE C 201  | 4440    | 4720   | 4540   | -200 | 1070  | -1030 | H0 |
| ATOM 9470 HD2 PHE C 201    | -46.676 | 16.136 | 43.356 | 1.00 | 35.28 | H0    |    |
| ANISOU 9470 HD2 PHE C 201  | 4300    | 4990   | 4120   | -440 | 980   | -990  | H0 |
| ATOM 9471 HE1 PHE C 201    | -43.471 | 18.962 | 41.540 | 1.00 | 34.90 | H0    |    |
| ANISOU 9471 HE1 PHE C 201  | 4380    | 4520   | 4360   | -340 | 960   | -1030 | H0 |
| ATOM 9472 HE2 PHE C 201    | -44.432 | 15.541 | 43.411 | 1.00 | 34.20 | H0    |    |
| ANISOU 9472 HE2 PHE C 201  | 4270    | 4740   | 3980   | -530 | 850   | -980  | H0 |
| ATOM 9473 HZ PHE C 201     | -42.823 | 16.950 | 42.502 | 1.00 | 33.97 | H0    |    |
| ANISOU 9473 HZ PHE C 201   | 4270    | 4540   | 4090   | -470 | 850   | -1020 | H0 |
| ATOM 9474 N ARG C 202      | -48.177 | 17.835 | 45.508 | 1.00 | 40.28 | N0    |    |
| ANISOU 9474 N ARG C 202    | 4880    | 5740   | 4690   | -380 | 1190  | -1210 | N0 |

|                            |         |        |        |      |       |       |    |
|----------------------------|---------|--------|--------|------|-------|-------|----|
| ATOM 9475 CA ARG C 202     | -47.644 | 17.354 | 46.810 | 1.00 | 41.67 | C0    |    |
| ANISOU 9475 CA ARG C 202   | 5120    | 5970   | 4740   | -510 | 1170  | -1270 | C0 |
| ATOM 9476 C ARG C 202      | -47.883 | 15.849 | 46.975 | 1.00 | 42.42 | C0    |    |
| ANISOU 9476 C ARG C 202    | 5210    | 6180   | 4720   | -640 | 1100  | -1170 | C0 |
| ATOM 9477 O ARG C 202      | -48.812 | 15.314 | 46.343 | 1.00 | 41.85 | O0    |    |
| ANISOU 9477 O ARG C 202    | 5070    | 6190   | 4640   | -630 | 1100  | -1100 | O0 |
| ATOM 9478 CB ARG C 202     | -48.295 | 18.126 | 47.962 | 1.00 | 42.81 | C0    |    |
| ANISOU 9478 CB ARG C 202   | 5240    | 6190   | 4830   | -490 | 1280  | -1400 | C0 |
| ATOM 9479 CG ARG C 202     | -49.782 | 17.854 | 48.126 | 1.00 | 43.64 | C0    |    |
| ANISOU 9479 CG ARG C 202   | 5230    | 6480   | 4870   | -470 | 1350  | -1400 | C0 |
| ATOM 9480 CD ARG C 202     | -50.397 | 18.553 | 49.324 | 1.00 | 45.14 | C0    |    |
| ANISOU 9480 CD ARG C 202   | 5390    | 6770   | 4990   | -450 | 1460  | -1550 | C0 |
| ATOM 9481 NE ARG C 202     | -51.803 | 18.182 | 49.448 | 1.00 | 45.98 | N0    |    |
| ANISOU 9481 NE ARG C 202   | 5360    | 7100   | 5020   | -450 | 1520  | -1550 | N0 |
| ATOM 9482 CZ ARG C 202     | -52.777 | 18.969 | 49.903 | 1.00 | 47.61 | C0    |    |
| ANISOU 9482 CZ ARG C 202   | 5470    | 7410   | 5210   | -350 | 1640  | -1670 | C0 |
| ATOM 9483 NH1 ARG C 202    | -52.524 | 20.207 | 50.290 | 1.00 | 48.42 | N0    |    |
| ANISOU 9483 NH1 ARG C 202  | 5620    | 7410   | 5370   | -230 | 1700  | -1800 | N0 |
| ATOM 9484 NH2 ARG C 202    | -54.013 | 18.509 | 49.961 | 1.00 | 48.68 | N0    |    |
| ANISOU 9484 NH2 ARG C 202  | 5460    | 7770   | 5260   | -370 | 1690  | -1650 | N0 |
| ATOM 9485 H ARG C 202      | -48.897 | 17.366 | 45.205 | 1.00 | 40.38 | H0    |    |
| ANISOU 9485 H ARG C 202    | 4830    | 5830   | 4680   | -380 | 1190  | -1170 | H0 |
| ATOM 9486 HA ARG C 202     | -46.674 | 17.520 | 46.826 | 1.00 | 41.18 | H0    |    |
| ANISOU 9486 HA ARG C 202   | 5120    | 5810   | 4710   | -530 | 1130  | -1280 | H0 |
| ATOM 9487 HB2 ARG C 202    | -47.837 | 17.891 | 48.795 | 1.00 | 43.04 | H0    |    |
| ANISOU 9487 HB2 ARG C 202  | 5330    | 6240   | 4780   | -580 | 1260  | -1430 | H0 |
| ATOM 9488 HB3 ARG C 202    | -48.165 | 19.085 | 47.807 | 1.00 | 43.25 | H0    |    |
| ANISOU 9488 HB3 ARG C 202  | 5310    | 6150   | 4970   | -400 | 1310  | -1460 | H0 |
| ATOM 9489 HG2 ARG C 202    | -50.252 | 18.147 | 47.316 | 1.00 | 43.57 | H0    |    |
| ANISOU 9489 HG2 ARG C 202  | 5160    | 6450   | 4940   | -380 | 1360  | -1370 | H0 |
| ATOM 9490 HG3 ARG C 202    | -49.925 | 16.889 | 48.220 | 1.00 | 43.31 | H0    |    |
| ANISOU 9490 HG3 ARG C 202  | 5180    | 6520   | 4750   | -570 | 1310  | -1330 | H0 |
| ATOM 9491 HD2 ARG C 202    | -49.915 | 18.297 | 50.139 | 1.00 | 45.26 | H0    |    |
| ANISOU 9491 HD2 ARG C 202  | 5470    | 6810   | 4920   | -550 | 1440  | -1580 | H0 |
| ATOM 9492 HD3 ARG C 202    | -50.316 | 19.522 | 49.209 | 1.00 | 45.60 | H0    |    |
| ANISOU 9492 HD3 ARG C 202  | 5460    | 6740   | 5130   | -350 | 1500  | -1620 | H0 |
| ATOM 9493 HE ARG C 202     | -52.025 | 17.374 | 49.207 | 1.00 | 45.58 | H0    |    |
| ANISOU 9493 HE ARG C 202   | 5280    | 7110   | 4920   | -530 | 1490  | -1460 | H0 |
| ATOM 9494 HH11 ARG C 202   | -51.709 | 20.526 | 50.253 | 1.00 | 47.95 | H0    |    |
| ANISOU 9494 HH11 ARG C 202 | 5650    | 7210   | 5360   | -230 | 1660  | -1810 | H0 |
| ATOM 9495 HH12 ARG C 202   | -53.177 | 20.715 | 50.581 | 1.00 | 49.65 | H0    |    |
| ANISOU 9495 HH12 ARG C 202 | 5710    | 7640   | 5520   | -150 | 1770  | -1890 | H0 |
| ATOM 9496 HH21 ARG C 202   | -54.188 | 17.684 | 49.705 | 1.00 | 48.12 | H0    |    |
| ANISOU 9496 HH21 ARG C 202 | 5360    | 7770   | 5150   | -460 | 1650  | -1560 | H0 |
| ATOM 9497 HH22 ARG C 202   | -54.658 | 19.023 | 50.258 | 1.00 | 49.82 | H0    |    |
| ANISOU 9497 HH22 ARG C 202 | 5530    | 8010   | 5400   | -290 | 1770  | -1740 | H0 |
| ATOM 9498 N LYS C 203      | -47.057 | 15.210 | 47.806 | 1.00 | 44.44 | N0    |    |
| ANISOU 9498 N LYS C 203    | 5560    | 6440   | 4890   | -750 | 1040  | -1180 | N0 |
| ATOM 9499 CA LYS C 203     | -47.323 | 13.875 | 48.399 | 1.00 | 46.47 | C0    |    |
| ANISOU 9499 CA LYS C 203   | 5850    | 6800   | 5000   | -890 | 970   | -1110 | C0 |
| ATOM 9500 C LYS C 203      | -48.677 | 13.962 | 49.105 | 1.00 | 49.30 | C0    |    |
| ANISOU 9500 C LYS C 203    | 6130    | 7340   | 5260   | -930 | 1080  | -1150 | C0 |
| ATOM 9501 O LYS C 203      | -48.907 | 14.985 | 49.794 | 1.00 | 49.59 | O0    |    |
| ANISOU 9501 O LYS C 203    | 6140    | 7410   | 5300   | -880 | 1180  | -1270 | O0 |

|                           |         |        |        |       |       |       |    |
|---------------------------|---------|--------|--------|-------|-------|-------|----|
| ATOM 9502 CB LYS C 203    | -46.214 | 13.497 | 49.388 | 1.00  | 47.24 | C0    |    |
| ANISOU 9502 CB LYS C 203  | 6060    | 6870   | 5020   | -990  | 900   | -1140 | C0 |
| ATOM 9503 CG LYS C 203    | -46.190 | 12.041 | 49.833 | 1.00  | 47.82 | C0    |    |
| ANISOU 9503 CG LYS C 203  | 6210    | 7000   | 4960   | -1120 | 790   | -1050 | C0 |
| ATOM 9504 CD LYS C 203    | -45.657 | 11.096 | 48.777 | 1.00  | 48.04 | C0    |    |
| ANISOU 9504 CD LYS C 203  | 6280    | 6930   | 5040   | -1100 | 670   | -940  | C0 |
| ATOM 9505 CE LYS C 203    | -45.022 | 9.846  | 49.349 | 1.00  | 48.97 | C0    |    |
| ANISOU 9505 CE LYS C 203  | 6530    | 7030   | 5040   | -1210 | 520   | -880  | C0 |
| ATOM 9506 NZ LYS C 203    | -43.631 | 10.104 | 49.795 | 1.00  | 49.80 | N0    |    |
| ANISOU 9506 NZ LYS C 203  | 6700    | 7060   | 5170   | -1180 | 460   | -930  | N0 |
| ATOM 9507 H LYS C 203     | -46.261 | 15.569 | 48.065 | 1.00  | 44.25 | H0    |    |
| ANISOU 9507 H LYS C 203   | 5580    | 6340   | 4880   | -750  | 1020  | -1220 | H0 |
| ATOM 9508 HA LYS C 203    | -47.369 | 13.204 | 47.679 | 1.00  | 45.90 | H0    |    |
| ANISOU 9508 HA LYS C 203  | 5780    | 6720   | 4950   | -900  | 910   | -1030 | H0 |
| ATOM 9509 HB2 LYS C 203   | -45.350 | 13.708 | 48.977 | 1.00  | 46.57 | H0    |    |
| ANISOU 9509 HB2 LYS C 203 | 6000    | 6690   | 5000   | -940  | 850   | -1140 | H0 |
| ATOM 9510 HB3 LYS C 203   | -46.308 | 14.061 | 50.184 | 1.00  | 47.96 | H0    |    |
| ANISOU 9510 HB3 LYS C 203 | 6150    | 7000   | 5070   | -1000 | 960   | -1220 | H0 |
| ATOM 9511 HG2 LYS C 203   | -45.633 | 11.967 | 50.637 | 1.00  | 48.36 | H0    |    |
| ANISOU 9511 HG2 LYS C 203 | 6350    | 7070   | 4960   | -1180 | 760   | -1080 | H0 |
| ATOM 9512 HG3 LYS C 203   | -47.101 | 11.768 | 50.074 | 1.00  | 48.59 | H0    |    |
| ANISOU 9512 HG3 LYS C 203 | 6280    | 7200   | 4980   | -1180 | 830   | -1030 | H0 |
| ATOM 9513 HD2 LYS C 203   | -46.394 | 10.833 | 48.185 | 1.00  | 47.80 | H0    |    |
| ANISOU 9513 HD2 LYS C 203 | 6210    | 6940   | 5020   | -1100 | 680   | -890  | H0 |
| ATOM 9514 HD3 LYS C 203   | -44.991 | 11.567 | 48.233 | 1.00  | 47.31 | H0    |    |
| ANISOU 9514 HD3 LYS C 203 | 6180    | 6760   | 5040   | -1020 | 660   | -960  | H0 |
| ATOM 9515 HE2 LYS C 203   | -45.546 | 9.529  | 50.108 | 1.00  | 49.79 | H0    |    |
| ANISOU 9515 HE2 LYS C 203 | 6660    | 7220   | 5040   | -1300 | 530   | -870  | H0 |
| ATOM 9516 HE3 LYS C 203   | -45.013 | 9.143  | 48.672 | 1.00  | 48.55 | H0    |    |
| ANISOU 9516 HE3 LYS C 203 | 6500    | 6940   | 5010   | -1200 | 450   | -810  | H0 |
| ATOM 9517 HZ1 LYS C 203   | -43.122 | 10.350 | 49.087 | 1.00  | 48.85 | H0    |    |
| ANISOU 9517 HZ1 LYS C 203 | 6550    | 6880   | 5140   | -1100 | 440   | -930  | H0 |
| ATOM 9518 HZ2 LYS C 203   | -43.283 | 9.352  | 50.164 | 1.00  | 49.71 | H0    |    |
| ANISOU 9518 HZ2 LYS C 203 | 6760    | 7040   | 5080   | -1230 | 360   | -890  | H0 |
| ATOM 9519 HZ3 LYS C 203   | -43.624 | 10.768 | 50.412 | 1.00  | 49.95 | H0    |    |
| ANISOU 9519 HZ3 LYS C 203 | 6700    | 7110   | 5170   | -1190 | 520   | -1000 | H0 |
| ATOM 9520 N LYS C 204     | -49.550 | 12.969 | 48.907 | 1.00  | 51.49 | N0    |    |
| ANISOU 9520 N LYS C 204   | 6370    | 7730   | 5460   | -1020 | 1050  | -1070 | N0 |
| ATOM 9521 CA LYS C 204    | -50.892 | 12.920 | 49.547 | 1.00  | 55.16 | C0    |    |
| ANISOU 9521 CA LYS C 204  | 6740    | 8410   | 5810   | -1080 | 1150  | -1100 | C0 |
| ATOM 9522 C LYS C 204     | -50.681 | 12.761 | 51.058 | 1.00  | 58.52 | C0    |    |
| ANISOU 9522 C LYS C 204   | 7230    | 8920   | 6080   | -1210 | 1170  | -1160 | C0 |
| ATOM 9523 O LYS C 204     | -49.903 | 11.862 | 51.447 | 1.00  | 59.75 | O0    |    |
| ANISOU 9523 O LYS C 204   | 7520    | 9020   | 6160   | -1330 | 1050  | -1090 | O0 |
| ATOM 9524 CB LYS C 204    | -51.744 | 11.814 | 48.914 | 1.00  | 55.57 | C0    |    |
| ANISOU 9524 CB LYS C 204  | 6750    | 8550   | 5810   | -1170 | 1110  | -980  | C0 |
| ATOM 9525 CG LYS C 204    | -52.018 | 12.020 | 47.429 | 1.00  | 55.03 | C0    |    |
| ANISOU 9525 CG LYS C 204  | 6600    | 8420   | 5890   | -1040 | 1090  | -920  | C0 |
| ATOM 9526 CD LYS C 204    | -53.251 | 11.324 | 46.899 | 1.00  | 55.90 | C0    |    |
| ANISOU 9526 CD LYS C 204  | 6610    | 8680   | 5950   | -1110 | 1100  | -850  | C0 |
| ATOM 9527 CE LYS C 204    | -53.084 | 9.828  | 46.752 | 1.00  | 55.67 | C0    |    |
| ANISOU 9527 CE LYS C 204  | 6690    | 8640   | 5820   | -1280 | 970   | -720  | C0 |
| ATOM 9528 NZ LYS C 204    | -53.870 | 9.309  | 45.606 | 1.00  | 55.68 | N0    |    |
| ANISOU 9528 NZ LYS C 204  | 6620    | 8690   | 5850   | -1290 | 940   | -640  | N0 |

|        |      |     |     |   |     |         |        |        |       |       |       |    |
|--------|------|-----|-----|---|-----|---------|--------|--------|-------|-------|-------|----|
| ATOM   | 9529 | H   | LYS | C | 204 | -49.368 | 12.256 | 48.369 | 1.00  | 50.87 | H0    |    |
| ANISOU | 9529 | H   | LYS | C | 204 | 6320    | 7620   | 5390   | -1050 | 980   | -990  | H0 |
| ATOM   | 9530 | HA  | LYS | C | 204 | -51.336 | 13.784 | 49.385 | 1.00  | 55.68 | H0    |    |
| ANISOU | 9530 | HA  | LYS | C | 204 | 6720    | 8490   | 5940   | -970  | 1230  | -1160 | H0 |
| ATOM   | 9531 | HB2 | LYS | C | 204 | -51.284 | 10.957 | 49.034 | 1.00  | 55.17 | H0    |    |
| ANISOU | 9531 | HB2 | LYS | C | 204 | 6790    | 8460   | 5710   | -1270 | 1010  | -910  | H0 |
| ATOM   | 9532 | HB3 | LYS | C | 204 | -52.600 | 11.767 | 49.390 | 1.00  | 56.59 | H0    |    |
| ANISOU | 9532 | HB3 | LYS | C | 204 | 6800    | 8840   | 5860   | -1230 | 1170  | -1000 | H0 |
| ATOM   | 9533 | HG2 | LYS | C | 204 | -52.108 | 12.983 | 47.263 | 1.00  | 55.18 | H0    |    |
| ANISOU | 9533 | HG2 | LYS | C | 204 | 6560    | 8410   | 5990   | -920  | 1160  | -990  | H0 |
| ATOM   | 9534 | HG3 | LYS | C | 204 | -51.240 | 11.707 | 46.924 | 1.00  | 53.99 | H0    |    |
| ANISOU | 9534 | HG3 | LYS | C | 204 | 6550    | 8160   | 5810   | -1030 | 1010  | -880  | H0 |
| ATOM   | 9535 | HD2 | LYS | C | 204 | -54.001 | 11.500 | 47.506 | 1.00  | 56.97 | H0    |    |
| ANISOU | 9535 | HD2 | LYS | C | 204 | 6670    | 8970   | 6010   | -1140 | 1170  | -890  | H0 |
| ATOM   | 9536 | HD3 | LYS | C | 204 | -53.478 | 11.704 | 46.024 | 1.00  | 55.50 | H0    |    |
| ANISOU | 9536 | HD3 | LYS | C | 204 | 6490    | 8600   | 5990   | -1000 | 1110  | -830  | H0 |
| ATOM   | 9537 | HE2 | LYS | C | 204 | -52.142 | 9.614  | 46.616 | 1.00  | 54.78 | H0    |    |
| ANISOU | 9537 | HE2 | LYS | C | 204 | 6680    | 8380   | 5750   | -1270 | 900   | -700  | H0 |
| ATOM   | 9538 | HE3 | LYS | C | 204 | -53.381 | 9.384  | 47.568 | 1.00  | 56.50 | H0    |    |
| ANISOU | 9538 | HE3 | LYS | C | 204 | 6820    | 8840   | 5810   | -1410 | 980   | -720  | H0 |
| ATOM   | 9539 | HZ1 | LYS | C | 204 | -54.736 | 9.569  | 45.684 | 1.00  | 56.45 | H0    |    |
| ANISOU | 9539 | HZ1 | LYS | C | 204 | 6600    | 8920   | 5920   | -1290 | 1010  | -660  | H0 |
| ATOM   | 9540 | HZ2 | LYS | C | 204 | -53.833 | 8.402  | 45.594 | 1.00  | 55.59 | H0    |    |
| ANISOU | 9540 | HZ2 | LYS | C | 204 | 6680    | 8670   | 5770   | -1400 | 870   | -570  | H0 |
| ATOM   | 9541 | HZ3 | LYS | C | 204 | -53.532 | 9.631  | 44.829 | 1.00  | 54.84 | H0    |    |
| ANISOU | 9541 | HZ3 | LYS | C | 204 | 6500    | 8480   | 5850   | -1180 | 920   | -630  | H0 |
| ATOM   | 9542 | N   | GLY | C | 205 | -51.299 | 13.641 | 51.858 | 1.00  | 61.36 | N0    |    |
| ANISOU | 9542 | N   | GLY | C | 205 | 7520    | 9400   | 6400   | -1180 | 1300  | -1280 | N0 |
| ATOM   | 9543 | CA  | GLY | C | 205 | -51.082 | 13.766 | 53.315 | 1.00  | 63.13 | C0    |    |
| ANISOU | 9543 | CA  | GLY | C | 205 | 7800    | 9710   | 6480   | -1290 | 1330  | -1370 | C0 |
| ATOM   | 9544 | C   | GLY | C | 205 | -51.598 | 12.556 | 54.074 | 1.00  | 64.69 | C0    |    |
| ANISOU | 9544 | C   | GLY | C | 205 | 8030    | 10080  | 6470   | -1510 | 1300  | -1290 | C0 |
| ATOM   | 9545 | O   | GLY | C | 205 | -50.896 | 11.551 | 54.201 | 1.00  | 64.83 | O0    |    |
| ANISOU | 9545 | O   | GLY | C | 205 | 8180    | 10020  | 6430   | -1630 | 1170  | -1190 | O0 |
| ATOM   | 9546 | H   | GLY | C | 205 | -51.912 | 14.231 | 51.534 | 1.00  | 61.51 | H0    |    |
| ANISOU | 9546 | H   | GLY | C | 205 | 7440    | 9460   | 6470   | -1090 | 1370  | -1330 | H0 |
| ATOM   | 9547 | HA2 | GLY | C | 205 | -50.113 | 13.873 | 53.488 | 1.00  | 62.58 | H0    |    |
| ANISOU | 9547 | HA2 | GLY | C | 205 | 7830    | 9510   | 6440   | -1280 | 1280  | -1380 | H0 |
| ATOM   | 9548 | HA3 | GLY | C | 205 | -51.543 | 14.579 | 53.641 | 1.00  | 64.05 | H0    |    |
| ANISOU | 9548 | HA3 | GLY | C | 205 | 7850    | 9890   | 6600   | -1210 | 1440  | -1480 | H0 |
| TER    | 9549 |     | GLY | C | 205 |         |        |        |       |       |       |    |
| ATOM   | 9550 | N   | ALA | D | 1   | -37.638 | 29.734 | -4.168 | 1.00  | 86.69 | N0    |    |
| ANISOU | 9550 | N   | ALA | D | 1   | 11660   | 13330  | 7950   | 870   | -430  | 2820  | N0 |
| ATOM   | 9551 | CA  | ALA | D | 1   | -38.348 | 30.910 | -3.577 | 1.00  | 87.87 | C0    |    |
| ANISOU | 9551 | CA  | ALA | D | 1   | 11780   | 13330  | 8270   | 1140  | -430  | 3010  | C0 |
| ATOM   | 9552 | C   | ALA | D | 1   | -38.815 | 30.580 | -2.151 | 1.00  | 85.32 | C0    |    |
| ANISOU | 9552 | C   | ALA | D | 1   | 11320   | 12910  | 8190   | 1140  | -440  | 2810  | C0 |
| ATOM   | 9553 | O   | ALA | D | 1   | -38.556 | 31.399 | -1.244 | 1.00  | 85.53 | O0    |    |
| ANISOU | 9553 | O   | ALA | D | 1   | 11420   | 12610  | 8470   | 1240  | -330  | 2830  | O0 |
| ATOM   | 9554 | CB  | ALA | D | 1   | -39.500 | 31.321 | -4.466 | 1.00  | 91.05 | C0    |    |
| ANISOU | 9554 | CB  | ALA | D | 1   | 12090   | 14050  | 8460   | 1360  | -600  | 3260  | C0 |
| ATOM   | 9555 | H   | ALA | D | 1   | -38.245 | 29.151 | -4.518 | 1.00  | 87.26 | H0    |    |
| ANISOU | 9555 | H   | ALA | D | 1   | 11620   | 13660  | 7870   | 850   | -550  | 2770  | H0 |
| ATOM   | 9556 | HA  | ALA | D | 1   | -37.709 | 31.660 | -3.525 | 1.00  | 87.99 | H0    |    |

|        |      |     |     |   |   |         |        |        |      |       |      |    |
|--------|------|-----|-----|---|---|---------|--------|--------|------|-------|------|----|
| ANISOU | 9556 | HA  | ALA | D | 1 | 11950   | 13100  | 8390   | 1180 | -310  | 3110 | H0 |
| ATOM   | 9557 | HB1 | ALA | D | 1 | -39.921 | 32.119 | -4.105 | 1.00 | 92.04 |      | H0 |
| ANISOU | 9557 | HB1 | ALA | D | 1 | 12210   | 14060  | 8700   | 1550 | -590  | 3390 | H0 |
| ATOM   | 9558 | HB2 | ALA | D | 1 | -39.170 | 31.506 | -5.361 | 1.00 | 92.51 |      | H0 |
| ANISOU | 9558 | HB2 | ALA | D | 1 | 12370   | 14300  | 8480   | 1350 | -590  | 3380 | H0 |
| ATOM   | 9559 | HB3 | ALA | D | 1 | -40.153 | 30.602 | -4.505 | 1.00 | 91.03 |      | H0 |
| ANISOU | 9559 | HB3 | ALA | D | 1 | 11930   | 14300  | 8360   | 1310 | -720  | 3150 | H0 |
| ATOM   | 9560 | N   | ASP | D | 2 | -39.465 | 29.425 | -1.957 | 1.00 | 83.63 |      | N0 |
| ANISOU | 9560 | N   | ASP | D | 2 | 10910   | 12960  | 7900   | 1020 | -570  | 2610 | N0 |
| ATOM   | 9561 | CA  | ASP | D | 2 | -40.030 | 28.982 | -0.649 | 1.00 | 81.20 |      | C0 |
| ANISOU | 9561 | CA  | ASP | D | 2 | 10440   | 12630  | 7790   | 1010 | -590  | 2430 | C0 |
| ATOM   | 9562 | C   | ASP | D | 2 | -39.082 | 27.960 | 0.002  | 1.00 | 77.53 |      | C0 |
| ANISOU | 9562 | C   | ASP | D | 2 | 10010   | 12020  | 7430   | 740  | -500  | 2140 | C0 |
| ATOM   | 9563 | O   | ASP | D | 2 | -38.070 | 27.592 | -0.632 | 1.00 | 76.75 |      | O0 |
| ANISOU | 9563 | O   | ASP | D | 2 | 10060   | 11870  | 7240   | 580  | -440  | 2090 | O0 |
| ATOM   | 9564 | CB  | ASP | D | 2 | -41.464 | 28.463 | -0.814 | 1.00 | 82.59 |      | C0 |
| ANISOU | 9564 | CB  | ASP | D | 2 | 10350   | 13200  | 7830   | 1070 | -790  | 2430 | C0 |
| ATOM   | 9565 | CG  | ASP | D | 2 | -41.604 | 27.245 | -1.712 | 1.00 | 83.04 |      | C0 |
| ANISOU | 9565 | CG  | ASP | D | 2 | 10340   | 13580  | 7630   | 840  | -920  | 2310 | C0 |
| ATOM   | 9566 | OD1 | ASP | D | 2 | -40.862 | 26.267 | -1.498 | 1.00 | 81.06 |      | O0 |
| ANISOU | 9566 | OD1 | ASP | D | 2 | 10150   | 13250  | 7410   | 600  | -860  | 2080 | O0 |
| ATOM   | 9567 | OD2 | ASP | D | 2 | -42.458 | 27.284 | -2.619 | 1.00 | 86.17 |      | O0 |
| ANISOU | 9567 | OD2 | ASP | D | 2 | 10630   | 14310  | 7810   | 920  | -1080 | 2440 | O0 |
| ATOM   | 9568 | H   | ASP | D | 2 | -39.601 | 28.828 | -2.631 | 1.00 | 84.23 |      | H0 |
| ANISOU | 9568 | H   | ASP | D | 2 | 10950   | 13260  | 7800   | 930  | -650  | 2580 | H0 |
| ATOM   | 9569 | HA  | ASP | D | 2 | -40.072 | 29.771 | -0.060 | 1.00 | 81.29 |      | H0 |
| ANISOU | 9569 | HA  | ASP | D | 2 | 10480   | 12440  | 7960   | 1160 | -530  | 2500 | H0 |
| ATOM   | 9570 | HB2 | ASP | D | 2 | -41.821 | 28.234 | 0.068  | 1.00 | 81.55 |      | H0 |
| ANISOU | 9570 | HB2 | ASP | D | 2 | 10110   | 13040  | 7840   | 1060 | -790  | 2330 | H0 |
| ATOM   | 9571 | HB3 | ASP | D | 2 | -42.016 | 29.181 | -1.187 | 1.00 | 84.71 |      | H0 |
| ANISOU | 9571 | HB3 | ASP | D | 2 | 10590   | 13540  | 8050   | 1260 | -840  | 2630 | H0 |
| ATOM   | 9572 | N   | ARG | D | 3 | -39.401 | 27.521 | 1.225  | 1.00 | 74.89 |      | N0 |
| ANISOU | 9572 | N   | ARG | D | 3 | 9560    | 11630  | 7270   | 700  | -500  | 1970 | N0 |
| ATOM   | 9573 | CA  | ARG | D | 3 | -38.515 | 26.669 | 2.069  | 1.00 | 71.47 |      | C0 |
| ANISOU | 9573 | CA  | ARG | D | 3 | 9170    | 11020  | 6970   | 490  | -400  | 1720 | C0 |
| ATOM   | 9574 | C   | ARG | D | 3 | -38.454 | 25.243 | 1.512  | 1.00 | 70.40 |      | C0 |
| ANISOU | 9574 | C   | ARG | D | 3 | 8980    | 11100  | 6670   | 250  | -480  | 1550 | C0 |
| ATOM   | 9575 | O   | ARG | D | 3 | -37.442 | 24.560 | 1.778  | 1.00 | 67.69 |      | O0 |
| ANISOU | 9575 | O   | ARG | D | 3 | 8730    | 10610  | 6380   | 80   | -390  | 1380 | O0 |
| ATOM   | 9576 | CB  | ARG | D | 3 | -38.984 | 26.681 | 3.528  | 1.00 | 70.18 |      | C0 |
| ANISOU | 9576 | CB  | ARG | D | 3 | 8880    | 10760  | 7020   | 540  | -380  | 1620 | C0 |
| ATOM   | 9577 | CG  | ARG | D | 3 | -38.736 | 28.009 | 4.225  | 1.00 | 70.41 |      | C0 |
| ANISOU | 9577 | CG  | ARG | D | 3 | 9010    | 10490  | 7250   | 740  | -270  | 1730 | C0 |
| ATOM   | 9578 | CD  | ARG | D | 3 | -39.282 | 28.062 | 5.636  | 1.00 | 69.78 |      | C0 |
| ANISOU | 9578 | CD  | ARG | D | 3 | 8820    | 10350  | 7350   | 820  | -250  | 1630 | C0 |
| ATOM   | 9579 | NE  | ARG | D | 3 | -39.039 | 29.367 | 6.237  | 1.00 | 70.40 |      | N0 |
| ANISOU | 9579 | NE  | ARG | D | 3 | 9020    | 10130  | 7600   | 1000 | -140  | 1710 | N0 |
| ATOM   | 9580 | CZ  | ARG | D | 3 | -39.723 | 30.477 | 5.968  | 1.00 | 72.72 |      | C0 |
| ANISOU | 9580 | CZ  | ARG | D | 3 | 9320    | 10410  | 7900   | 1270 | -150  | 1910 | C0 |
| ATOM   | 9581 | NH1 | ARG | D | 3 | -40.719 | 30.464 | 5.095  | 1.00 | 74.71 |      | N0 |
| ANISOU | 9581 | NH1 | ARG | D | 3 | 9450    | 10950  | 7980   | 1380 | -280  | 2060 | N0 |
| ATOM   | 9582 | NH2 | ARG | D | 3 | -39.404 | 31.605 | 6.579  | 1.00 | 73.42 |      | N0 |
| ANISOU | 9582 | NH2 | ARG | D | 3 | 9550    | 10190  | 8160   | 1410 | -40   | 1950 | N0 |
| ATOM   | 9583 | H   | ARG | D | 3 | -40.194 | 27.725 | 1.622  | 1.00 | 75.56 |      | H0 |



|                          |                                  |    |
|--------------------------|----------------------------------|----|
| ANISOU 9583 H ARG D 3    | 9530 11780 7400 820 -550 2010    | H0 |
| ATOM 9584 HA ARG D 3     | -37.608 27.051 2.034 1.00 70.92  | H0 |
| ANISOU 9584 HA ARG D 3   | 9240 10750 6960 470 -300 1740    | H0 |
| ATOM 9585 HB2 ARG D 3    | -39.943 26.481 3.553 1.00 71.09  | H0 |
| ANISOU 9585 HB2 ARG D 3  | 8850 11070 7090 600 -480 1640    | H0 |
| ATOM 9586 HB3 ARG D 3    | -38.514 25.973 4.016 1.00 68.44  | H0 |
| ANISOU 9586 HB3 ARG D 3  | 8670 10470 6860 400 -340 1460    | H0 |
| ATOM 9587 HG2 ARG D 3    | -37.770 28.179 4.255 1.00 69.58  | H0 |
| ANISOU 9587 HG2 ARG D 3  | 9050 10190 7200 670 -170 1700    | H0 |
| ATOM 9588 HG3 ARG D 3    | -39.147 28.727 3.700 1.00 72.32  | H0 |
| ANISOU 9588 HG3 ARG D 3  | 9270 10770 7430 890 -300 1900    | H0 |
| ATOM 9589 HD2 ARG D 3    | -40.246 27.880 5.623 1.00 70.64  | H0 |
| ANISOU 9589 HD2 ARG D 3  | 8770 10660 7400 890 -340 1660    | H0 |
| ATOM 9590 HD3 ARG D 3    | -38.850 27.368 6.179 1.00 67.95  | H0 |
| ANISOU 9590 HD3 ARG D 3  | 8580 10070 7170 670 -210 1470    | H0 |
| ATOM 9591 HE ARG D 3     | -38.391 29.427 6.818 1.00 69.15  | H0 |
| ANISOU 9591 HE ARG D 3   | 8930 9790 7550 940 -60 1620      | H0 |
| ATOM 9592 HH11 ARG D 3   | -40.940 29.722 4.684 1.00 74.58  | H0 |
| ANISOU 9592 HH11 ARG D 3 | 9340 11140 7850 1280 -360 2030   | H0 |
| ATOM 9593 HH12 ARG D 3   | -41.162 31.205 4.929 1.00 76.45  | H0 |
| ANISOU 9593 HH12 ARG D 3 | 9680 11160 8210 1570 -290 2210   | H0 |
| ATOM 9594 HH21 ARG D 3   | -38.743 31.619 7.160 1.00 72.07  | H0 |
| ANISOU 9594 HH21 ARG D 3 | 9460 9830 8090 1330 40 1840      | H0 |
| ATOM 9595 HH22 ARG D 3   | -39.855 32.342 6.404 1.00 75.07  | H0 |
| ANISOU 9595 HH22 ARG D 3 | 9780 10370 8380 1600 -50 2090    | H0 |
| ATOM 9596 N ALA D 4      | -39.487 24.814 0.776 1.00 72.01  | N0 |
| ANISOU 9596 N ALA D 4    | 9050 11640 6680 250 -650 1590    | N0 |
| ATOM 9597 CA ALA D 4     | -39.555 23.490 0.113 1.00 72.34  | C0 |
| ANISOU 9597 CA ALA D 4   | 9060 11900 6530 30 -740 1420     | C0 |
| ATOM 9598 C ALA D 4      | -38.514 23.439 -1.012 1.00 72.89 | C0 |
| ANISOU 9598 C ALA D 4    | 9320 11940 6430 -50 -680 1430    | C0 |
| ATOM 9599 O ALA D 4      | -37.762 22.448 -1.074 1.00 71.15 | O0 |
| ANISOU 9599 O ALA D 4    | 9180 11670 6190 -240 -630 1230   | O0 |
| ATOM 9600 CB ALA D 4     | -40.951 23.227 -0.399 1.00 74.68 | C0 |
| ANISOU 9600 CB ALA D 4   | 9150 12570 6660 50 -940 1470     | C0 |
| ATOM 9601 H ALA D 4      | -40.236 25.312 0.630 1.00 73.59  | H0 |
| ANISOU 9601 H ALA D 4    | 9170 11950 6840 390 -720 1710    | H0 |
| ATOM 9602 HA ALA D 4     | -39.327 22.799 0.778 1.00 70.68  | H0 |
| ANISOU 9602 HA ALA D 4   | 8830 11600 6420 -100 -710 1260   | H0 |
| ATOM 9603 HB1 ALA D 4    | -41.045 22.284 -0.616 1.00 74.60 | H0 |
| ANISOU 9603 HB1 ALA D 4  | 9110 12670 6560 -120 -1000 1330  | H0 |
| ATOM 9604 HB2 ALA D 4    | -41.600 23.466 0.284 1.00 74.63  | H0 |
| ANISOU 9604 HB2 ALA D 4  | 9020 12580 6760 140 -970 1510    | H0 |
| ATOM 9605 HB3 ALA D 4    | -41.112 23.758 -1.196 1.00 76.43 | H0 |
| ANISOU 9605 HB3 ALA D 4  | 9400 12900 6740 150 -990 1620    | H0 |
| ATOM 9606 N ASP D 5      | -38.475 24.478 -1.857 1.00 75.13 | N0 |
| ANISOU 9606 N ASP D 5    | 9690 12260 6600 110 -670 1670    | N0 |
| ATOM 9607 CA ASP D 5     | -37.466 24.657 -2.937 1.00 75.83 | C0 |
| ANISOU 9607 CA ASP D 5   | 9970 12320 6520 70 -590 1730     | C0 |
| ATOM 9608 C ASP D 5      | -36.062 24.571 -2.328 1.00 72.96 | C0 |
| ANISOU 9608 C ASP D 5    | 9750 11630 6340 -30 -390 1610    | C0 |
| ATOM 9609 O ASP D 5      | -35.259 23.760 -2.820 1.00 72.07 | O0 |
| ANISOU 9609 O ASP D 5    | 9720 11540 6120 -190 -340 1470   | O0 |
| ATOM 9610 CB ASP D 5     | -37.653 25.988 -3.672 1.00 78.72 | C0 |

|        |      |      |     |   |   |         |        |        |      |       |      |    |
|--------|------|------|-----|---|---|---------|--------|--------|------|-------|------|----|
| ANISOU | 9610 | CB   | ASP | D | 5 | 10400   | 12710  | 6800   | 290  | -590  | 2050 | C0 |
| ATOM   | 9611 | CG   | ASP | D | 5 | -38.873 | 26.035 | -4.577 | 1.00 | 82.16 |      | C0 |
| ANISOU | 9611 | CG   | ASP | D | 5 | 10710   | 13530  | 6980   | 390  | -790  | 2180 | C0 |
| ATOM   | 9612 | OD1  | ASP | D | 5 | -39.090 | 25.053 | -5.319 | 1.00 | 83.90 |      | O0 |
| ANISOU | 9612 | OD1  | ASP | D | 5 | 10890   | 14020  | 6970   | 240  | -890  | 2050 | O0 |
| ATOM   | 9613 | OD2  | ASP | D | 5 | -39.595 | 27.055 | -4.538 | 1.00 | 83.90 |      | O0 |
| ANISOU | 9613 | OD2  | ASP | D | 5 | 10870   | 13770  | 7240   | 620  | -830  | 2420 | O0 |
| ATOM   | 9614 | H    | ASP | D | 5 | -39.086 | 25.153 | -1.819 | 1.00 | 76.16 |      | H0 |
| ANISOU | 9614 | H    | ASP | D | 5 | 9760    | 12440  | 6740   | 260  | -720  | 1810 | H0 |
| ATOM   | 9615 | HA   | ASP | D | 5 | -37.573 | 23.923 | -3.586 | 1.00 | 76.54 |      | H0 |
| ANISOU | 9615 | HA   | ASP | D | 5 | 10050   | 12600  | 6430   | -40  | -660  | 1640 | H0 |
| ATOM   | 9616 | HB2  | ASP | D | 5 | -37.732 | 26.707 | -3.013 | 1.00 | 78.35 |      | H0 |
| ANISOU | 9616 | HB2  | ASP | D | 5 | 10350   | 12490  | 6930   | 410  | -540  | 2130 | H0 |
| ATOM   | 9617 | HB3  | ASP | D | 5 | -36.860 | 26.163 | -4.219 | 1.00 | 79.00 |      | H0 |
| ANISOU | 9617 | HB3  | ASP | D | 5 | 10570   | 12680  | 6770   | 250  | -500  | 2090 | H0 |
| ATOM   | 9618 | N    | ILE | D | 6 | -35.799 | 25.359 | -1.280 | 1.00 | 71.58 |      | N0 |
| ANISOU | 9618 | N    | ILE | D | 6 | 9590    | 11180  | 6430   | 60   | -290  | 1660 | N0 |
| ATOM   | 9619 | CA   | ILE | D | 6 | -34.475 | 25.434 | -0.588 | 1.00 | 69.43 |      | C0 |
| ANISOU | 9619 | CA   | ILE | D | 6 | 9430    | 10600  | 6350   | -20  | -110  | 1570 | C0 |
| ATOM   | 9620 | C    | ILE | D | 6 | -34.058 | 24.021 | -0.157 | 1.00 | 68.12 |      | C0 |
| ANISOU | 9620 | C    | ILE | D | 6 | 9230    | 10440  | 6210   | -220 | -100  | 1290 | C0 |
| ATOM   | 9621 | O    | ILE | D | 6 | -32.895 | 23.656 | -0.414 | 1.00 | 67.19 |      | O0 |
| ANISOU | 9621 | O    | ILE | D | 6 | 9220    | 10240  | 6080   | -330 | 10    | 1210 | O0 |
| ATOM   | 9622 | CB   | ILE | D | 6 | -34.508 | 26.420 | 0.601  | 1.00 | 67.90 |      | C0 |
| ANISOU | 9622 | CB   | ILE | D | 6 | 9230    | 10140  | 6430   | 100  | -50   | 1630 | C0 |
| ATOM   | 9623 | CG1  | ILE | D | 6 | -34.702 | 27.866 | 0.136  | 1.00 | 69.84 |      | C0 |
| ANISOU | 9623 | CG1  | ILE | D | 6 | 9560    | 10300  | 6670   | 300  | -20   | 1910 | C0 |
| ATOM   | 9624 | CG2  | ILE | D | 6 | -33.256 | 26.274 | 1.461  | 1.00 | 65.33 |      | C0 |
| ANISOU | 9624 | CG2  | ILE | D | 6 | 8980    | 9540   | 6300   | -20  | 100   | 1480 | C0 |
| ATOM   | 9625 | CD1  | ILE | D | 6 | -35.036 | 28.836 | 1.248  | 1.00 | 69.68 |      | C0 |
| ANISOU | 9625 | CD1  | ILE | D | 6 | 9530    | 10050  | 6890   | 460  | 20    | 1960 | C0 |
| ATOM   | 9626 | H    | ILE | D | 6 | -36.429 | 25.903 | -0.912 | 1.00 | 72.05 |      | H0 |
| ANISOU | 9626 | H    | ILE | D | 6 | 9580    | 11230  | 6560   | 190  | -330  | 1750 | H0 |
| ATOM   | 9627 | HA   | ILE | D | 6 | -33.820 | 25.761 | -1.230 | 1.00 | 70.15 |      | H0 |
| ANISOU | 9627 | HA   | ILE | D | 6 | 9630    | 10650  | 6370   | -30  | -40   | 1650 | H0 |
| ATOM   | 9628 | HB   | ILE | D | 6 | -35.286 | 26.182 | 1.163  | 1.00 | 67.57 |      | H0 |
| ANISOU | 9628 | HB   | ILE | D | 6 | 9070    | 10160  | 6440   | 140  | -120  | 1580 | H0 |
| ATOM   | 9629 | HG12 | ILE | D | 6 | -33.879 | 28.166 | -0.305 | 1.00 | 70.22 |      | H0 |
| ANISOU | 9629 | HG12 | ILE | D | 6 | 9730    | 10250  | 6700   | 250  | 70    | 1970 | H0 |
| ATOM   | 9630 | HG13 | ILE | D | 6 | -35.423 | 27.890 | -0.528 | 1.00 | 71.50 |      | H0 |
| ANISOU | 9630 | HG13 | ILE | D | 6 | 9730    | 10710  | 6730   | 370  | -120  | 2010 | H0 |
| ATOM   | 9631 | HG21 | ILE | D | 6 | -33.311 | 25.455 | 1.983  | 1.00 | 64.05 |      | H0 |
| ANISOU | 9631 | HG21 | ILE | D | 6 | 8750    | 9410   | 6170   | -100 | 80    | 1320 | H0 |
| ATOM   | 9632 | HG22 | ILE | D | 6 | -33.181 | 27.032 | 2.065  | 1.00 | 65.28 |      | H0 |
| ANISOU | 9632 | HG22 | ILE | D | 6 | 9000    | 9360   | 6440   | 60   | 150   | 1540 | H0 |
| ATOM   | 9633 | HG23 | ILE | D | 6 | -32.470 | 26.240 | 0.889  | 1.00 | 65.64 |      | H0 |
| ANISOU | 9633 | HG23 | ILE | D | 6 | 9110    | 9560   | 6270   | -90  | 180   | 1500 | H0 |
| ATOM   | 9634 | HD11 | ILE | D | 6 | -35.798 | 28.504 | 1.754  | 1.00 | 69.27 |      | H0 |
| ANISOU | 9634 | HD11 | ILE | D | 6 | 9360    | 10090  | 6870   | 490  | -60   | 1890 | H0 |
| ATOM   | 9635 | HD12 | ILE | D | 6 | -35.256 | 29.702 | 0.866  | 1.00 | 71.35 |      | H0 |
| ANISOU | 9635 | HD12 | ILE | D | 6 | 9800    | 10220  | 7090   | 590  | 20    | 2150 | H0 |
| ATOM   | 9636 | HD13 | ILE | D | 6 | -34.271 | 28.932 | 1.841  | 1.00 | 68.37 |      | H0 |
| ANISOU | 9636 | HD13 | ILE | D | 6 | 9430    | 9680   | 6870   | 380  | 120   | 1880 | H0 |
| ATOM   | 9637 | N    | LEU | D | 7 | -34.963 | 23.259 | 0.468  | 1.00 | 68.77 |      | N0 |

|                          |                                  |    |
|--------------------------|----------------------------------|----|
| ANISOU 9637 N LEU D 7    | 9170 10630 6330 -260 -210 1160   | N0 |
| ATOM 9638 CA LEU D 7     | -34.681 21.881 0.961 1.00 68.15  | C0 |
| ANISOU 9638 CA LEU D 7   | 9060 10550 6290 -440 -210 910    | C0 |
| ATOM 9639 C LEU D 7      | -34.384 20.970 -0.235 1.00 69.27 | C0 |
| ANISOU 9639 C LEU D 7    | 9270 10860 6190 -570 -240 820    | C0 |
| ATOM 9640 O LEU D 7      | -33.271 20.403 -0.277 1.00 68.23 | O0 |
| ANISOU 9640 O LEU D 7    | 9240 10610 6070 -670 -120 690    | O0 |
| ATOM 9641 CB LEU D 7     | -35.865 21.347 1.777 1.00 68.35  | C0 |
| ANISOU 9641 CB LEU D 7   | 8910 10680 6390 -460 -330 840    | C0 |
| ATOM 9642 CG LEU D 7     | -35.751 19.881 2.205 1.00 67.55  | C0 |
| ANISOU 9642 CG LEU D 7   | 8780 10570 6310 -650 -340 600    | C0 |
| ATOM 9643 CD1 LEU D 7    | -34.435 19.615 2.922 1.00 65.63  | C0 |
| ANISOU 9643 CD1 LEU D 7  | 8640 10070 6230 -710 -180 490    | C0 |
| ATOM 9644 CD2 LEU D 7    | -36.923 19.476 3.084 1.00 67.78  | C0 |
| ANISOU 9644 CD2 LEU D 7  | 8620 10700 6430 -670 -440 560    | C0 |
| ATOM 9645 H LEU D 7      | -35.813 23.544 0.635 1.00 69.38  | H0 |
| ANISOU 9645 H LEU D 7    | 9150 10800 6420 -170 -290 1230   | H0 |
| ATOM 9646 HA LEU D 7     | -33.881 21.919 1.534 1.00 66.66  | H0 |
| ANISOU 9646 HA LEU D 7   | 8920 10170 6240 -470 -100 860    | H0 |
| ATOM 9647 HB2 LEU D 7    | -35.962 21.898 2.578 1.00 67.60  | H0 |
| ANISOU 9647 HB2 LEU D 7  | 8770 10460 6450 -370 -290 880    | H0 |
| ATOM 9648 HB3 LEU D 7    | -36.679 21.452 1.245 1.00 69.85  | H0 |
| ANISOU 9648 HB3 LEU D 7  | 9030 11060 6460 -420 -440 910    | H0 |
| ATOM 9649 HG LEU D 7     | -35.774 19.321 1.391 1.00 68.55  | H0 |
| ANISOU 9649 HG LEU D 7   | 8940 10830 6280 -730 -390 540    | H0 |
| ATOM 9650 HD11 LEU D 7   | -33.706 19.613 2.277 1.00 65.84  | H0 |
| ANISOU 9650 HD11 LEU D 7 | 8770 10070 6180 -730 -130 490    | H0 |
| ATOM 9651 HD12 LEU D 7   | -34.475 18.750 3.366 1.00 64.80  | H0 |
| ANISOU 9651 HD12 LEU D 7 | 8510 9950 6170 -800 -190 360     | H0 |
| ATOM 9652 HD13 LEU D 7   | -34.279 20.311 3.584 1.00 64.84  | H0 |
| ANISOU 9652 HD13 LEU D 7 | 8530 9840 6260 -620 -130 550     | H0 |
| ATOM 9653 HD21 LEU D 7   | -36.964 20.058 3.861 1.00 66.91  | H0 |
| ANISOU 9653 HD21 LEU D 7 | 8480 10480 6460 -580 -400 610    | H0 |
| ATOM 9654 HD22 LEU D 7   | -36.806 18.555 3.374 1.00 66.92  | H0 |
| ANISOU 9654 HD22 LEU D 7 | 8510 10570 6350 -800 -440 420    | H0 |
| ATOM 9655 HD23 LEU D 7   | -37.750 19.553 2.577 1.00 69.15  | H0 |
| ANISOU 9655 HD23 LEU D 7 | 8720 11070 6490 -650 -550 620    | H0 |
| ATOM 9656 N TYR D 8      | -35.340 20.834 -1.161 1.00 71.35 | N0 |
| ANISOU 9656 N TYR D 8    | 9480 11400 6230 -570 -390 870    | N0 |
| ATOM 9657 CA TYR D 8     | -35.194 20.047 -2.415 1.00 73.09 | C0 |
| ANISOU 9657 CA TYR D 8   | 9770 11820 6180 -680 -440 780    | C0 |
| ATOM 9658 C TYR D 8      | -33.803 20.306 -3.012 1.00 73.03 | C0 |
| ANISOU 9658 C TYR D 8    | 9940 11690 6120 -680 -270 800    | C0 |
| ATOM 9659 O TYR D 8      | -33.095 19.329 -3.327 1.00 72.87 | O0 |
| ANISOU 9659 O TYR D 8    | 10010 11660 6020 -810 -210 610   | O0 |
| ATOM 9660 CB TYR D 8     | -36.306 20.389 -3.412 1.00 76.31 | C0 |
| ANISOU 9660 CB TYR D 8   | 10110 12540 6340 -610 -610 920   | C0 |
| ATOM 9661 CG TYR D 8     | -36.133 19.765 -4.774 1.00 78.34 | C0 |
| ANISOU 9661 CG TYR D 8   | 10460 13020 6290 -710 -660 840   | C0 |
| ATOM 9662 CD1 TYR D 8    | -36.621 18.497 -5.047 1.00 79.30 | C0 |
| ANISOU 9662 CD1 TYR D 8  | 10540 13310 6280 -900 -770 610   | C0 |
| ATOM 9663 CD2 TYR D 8    | -35.462 20.434 -5.787 1.00 80.30 | C0 |
| ANISOU 9663 CD2 TYR D 8  | 10840 13310 6360 -640 -580 990   | C0 |
| ATOM 9664 CE1 TYR D 8    | -36.455 17.914 -6.294 1.00 81.58 | C0 |

|        |      |      |     |   |    |         |        |        |       |       |      |    |
|--------|------|------|-----|---|----|---------|--------|--------|-------|-------|------|----|
| ANISOU | 9664 | CE1  | TYR | D | 8  | 10930   | 13800  | 6270   | -990  | -820  | 520  | C0 |
| ATOM   | 9665 | CE2  | TYR | D | 8  | -35.287 | 19.865 | -7.040 | 1.00  | 82.38 |      | C0 |
| ANISOU | 9665 | CE2  | TYR | D | 8  | 11190   | 13800  | 6310   | -720  | -620  | 920  | C0 |
| ATOM   | 9666 | CZ   | TYR | D | 8  | -35.785 | 18.599 | -7.294 | 1.00  | 82.93 |      | C0 |
| ANISOU | 9666 | CZ   | TYR | D | 8  | 11230   | 14030  | 6250   | -890  | -740  | 670  | C0 |
| ATOM   | 9667 | OH   | TYR | D | 8  | -35.618 | 18.029 | -8.523 | 1.00  | 85.56 |      | O0 |
| ANISOU | 9667 | OH   | TYR | D | 8  | 11670   | 14580  | 6260   | -980  | -770  | 570  | O0 |
| ATOM   | 9668 | H    | TYR | D | 8  | -36.162 | 21.220 | -1.087 | 1.00  | 72.19 |      | H0 |
| ANISOU | 9668 | H    | TYR | D | 8  | 9490    | 11600  | 6330   | -490  | -470  | 960  | H0 |
| ATOM   | 9669 | HA   | TYR | D | 8  | -35.260 | 19.085 | -2.189 | 1.00  | 72.58 |      | H0 |
| ANISOU | 9669 | HA   | TYR | D | 8  | 9690    | 11760  | 6120   | -800  | -460  | 600  | H0 |
| ATOM   | 9670 | HB2  | TYR | D | 8  | -37.162 | 20.094 | -3.035 | 1.00  | 76.33 |      | H0 |
| ANISOU | 9670 | HB2  | TYR | D | 8  | 9980    | 12640  | 6380   | -640  | -710  | 880  | H0 |
| ATOM   | 9671 | HB3  | TYR | D | 8  | -36.344 | 21.363 | -3.512 | 1.00  | 76.78 |      | H0 |
| ANISOU | 9671 | HB3  | TYR | D | 8  | 10170   | 12580  | 6420   | -470  | -590  | 1110 | H0 |
| ATOM   | 9672 | HD1  | TYR | D | 8  | -37.077 | 18.022 | -4.373 | 1.00  | 78.51 |      | H0 |
| ANISOU | 9672 | HD1  | TYR | D | 8  | 10350   | 13180  | 6300   | -960  | -820  | 520  | H0 |
| ATOM   | 9673 | HD2  | TYR | D | 8  | -35.118 | 21.296 | -5.621 | 1.00  | 79.88 |      | H0 |
| ANISOU | 9673 | HD2  | TYR | D | 8  | 10820   | 13140  | 6400   | -530  | -500  | 1150 | H0 |
| ATOM   | 9674 | HE1  | TYR | D | 8  | -36.797 | 17.051 | -6.462 | 1.00  | 82.14 |      | H0 |
| ANISOU | 9674 | HE1  | TYR | D | 8  | 10980   | 13960  | 6260   | -1120 | -900  | 350  | H0 |
| ATOM   | 9675 | HE2  | TYR | D | 8  | -34.830 | 20.338 | -7.716 | 1.00  | 83.35 |      | H0 |
| ANISOU | 9675 | HE2  | TYR | D | 8  | 11400   | 13960  | 6310   | -670  | -550  | 1030 | H0 |
| ATOM   | 9676 | N    | ASN | D | 9  | -33.422 | 21.584 | -3.132 | 1.00  | 73.20 |      | N0 |
| ANISOU | 9676 | N    | ASN | D | 9  | 10020   | 11610  | 6180   | -540  | -180  | 1030 | N0 |
| ATOM   | 9677 | CA   | ASN | D | 9  | -32.148 | 22.035 | -3.760 | 1.00  | 74.23 |      | C0 |
| ANISOU | 9677 | CA   | ASN | D | 9  | 10300   | 11650  | 6250   | -540  | -20   | 1100 | C0 |
| ATOM   | 9678 | C    | ASN | D | 9  | -30.949 | 21.609 | -2.903 | 1.00  | 73.00 |      | C0 |
| ANISOU | 9678 | C    | ASN | D | 9  | 10190   | 11240  | 6310   | -630  | 140   | 950  | C0 |
| ATOM   | 9679 | O    | ASN | D | 9  | -29.895 | 21.292 | -3.492 | 1.00  | 74.00 |      | O0 |
| ANISOU | 9679 | O    | ASN | D | 9  | 10410   | 11360  | 6340   | -690  | 260   | 890  | O0 |
| ATOM   | 9680 | CB   | ASN | D | 9  | -32.151 | 23.542 | -4.027 | 1.00  | 74.70 |      | C0 |
| ANISOU | 9680 | CB   | ASN | D | 9  | 10410   | 11640  | 6330   | -380  | 20    | 1400 | C0 |
| ATOM   | 9681 | CG   | ASN | D | 9  | -32.786 | 23.881 | -5.358 | 1.00  | 77.05 |      | C0 |
| ANISOU | 9681 | CG   | ASN | D | 9  | 10730   | 12220  | 6330   | -310  | -80   | 1580 | C0 |
| ATOM   | 9682 | OD1  | ASN | D | 9  | -32.248 | 23.531 | -6.404 | 1.00  | 78.80 |      | O0 |
| ANISOU | 9682 | OD1  | ASN | D | 9  | 11040   | 12580  | 6320   | -370  | -40   | 1560 | O0 |
| ATOM   | 9683 | ND2  | ASN | D | 9  | -33.930 | 24.545 | -5.335 | 1.00  | 77.77 |      | N0 |
| ANISOU | 9683 | ND2  | ASN | D | 9  | 10730   | 12410  | 6410   | -170  | -210  | 1750 | N0 |
| ATOM   | 9684 | H    | ASN | D | 9  | -33.938 | 22.271 | -2.831 | 1.00  | 73.63 |      | H0 |
| ANISOU | 9684 | H    | ASN | D | 9  | 10020   | 11650  | 6310   | -440  | -220  | 1150 | H0 |
| ATOM   | 9685 | HA   | ASN | D | 9  | -32.071 | 21.584 | -4.634 | 1.00  | 75.37 |      | H0 |
| ANISOU | 9685 | HA   | ASN | D | 9  | 10490   | 11950  | 6190   | -590  | -40   | 1060 | H0 |
| ATOM   | 9686 | HB2  | ASN | D | 9  | -32.638 | 23.995 | -3.309 | 1.00  | 74.15 |      | H0 |
| ANISOU | 9686 | HB2  | ASN | D | 9  | 10270   | 11490  | 6420   | -310  | -10   | 1450 | H0 |
| ATOM   | 9687 | HB3  | ASN | D | 9  | -31.228 | 23.869 | -4.021 | 1.00  | 74.37 |      | H0 |
| ANISOU | 9687 | HB3  | ASN | D | 9  | 10450   | 11460  | 6350   | -400  | 160   | 1440 | H0 |
| ATOM   | 9688 | HD21 | ASN | D | 9  | -34.443 | 24.568 | -6.055 | 1.00  | 79.66 |      | H0 |
| ANISOU | 9688 | HD21 | ASN | D | 9  | 10950   | 12850  | 6460   | -130  | -300  | 1820 | H0 |
| ATOM   | 9689 | HD22 | ASN | D | 9  | -34.184 | 24.968 | -4.601 | 1.00  | 77.16 |      | H0 |
| ANISOU | 9689 | HD22 | ASN | D | 9  | 10600   | 12210  | 6500   | -100  | -210  | 1780 | H0 |
| ATOM   | 9690 | N    | ILE | D | 10 | -31.092 | 21.611 | -1.574 | 1.00  | 71.98 |      | N0 |
| ANISOU | 9690 | N    | ILE | D | 10 | 9980    | 10930  | 6440   | -620  | 140   | 880  | N0 |
| ATOM   | 9691 | CA   | ILE | D | 10 | -30.053 | 21.102 | -0.627 | 1.00  | 70.49 |      | C0 |

|                           |         |        |        |       |       |      |    |
|---------------------------|---------|--------|--------|-------|-------|------|----|
| ANISOU 9691 CA ILE D 10   | 9800    | 10530  | 6450   | -700  | 270   | 720  | C0 |
| ATOM 9692 C ILE D 10      | -29.799 | 19.618 | -0.934 | 1.00  | 71.34 |      | C0 |
| ANISOU 9692 C ILE D 10    | 9930    | 10720  | 6450   | -830  | 260   | 490  | C0 |
| ATOM 9693 O ILE D 10      | -28.617 | 19.247 | -1.061 | 1.00  | 71.47 |      | O0 |
| ANISOU 9693 O ILE D 10    | 10020   | 10660  | 6470   | -870  | 400   | 410  | O0 |
| ATOM 9694 CB ILE D 10     | -30.458 | 21.348 | 0.842  | 1.00  | 68.75 |      | C0 |
| ANISOU 9694 CB ILE D 10   | 9480    | 10150  | 6490   | -660  | 250   | 700  | C0 |
| ATOM 9695 CG1 ILE D 10    | -30.147 | 22.785 | 1.273  | 1.00  | 68.71 |      | C0 |
| ANISOU 9695 CG1 ILE D 10  | 9510    | 9960   | 6640   | -560  | 320   | 880  | C0 |
| ATOM 9696 CG2 ILE D 10    | -29.808 | 20.327 | 1.769  | 1.00  | 67.28 |      | C0 |
| ANISOU 9696 CG2 ILE D 10  | 9280    | 9840   | 6450   | -760  | 310   | 490  | C0 |
| ATOM 9697 CD1 ILE D 10    | -30.815 | 23.208 | 2.566  | 1.00  | 67.57 |      | C0 |
| ANISOU 9697 CD1 ILE D 10  | 9270    | 9700   | 6700   | -480  | 280   | 880  | C0 |
| ATOM 9698 H ILE D 10      | -31.833 | 21.941 | -1.160 | 1.00  | 71.86 |      | H0 |
| ANISOU 9698 H ILE D 10    | 9890    | 10930  | 6490   | -560  | 70    | 940  | H0 |
| ATOM 9699 HA ILE D 10     | -29.228 | 21.591 | -0.797 | 1.00  | 70.65 |      | H0 |
| ANISOU 9699 HA ILE D 10   | 9880    | 10470  | 6490   | -690  | 380   | 790  | H0 |
| ATOM 9700 HB ILE D 10     | -31.435 | 21.227 | 0.908  | 1.00  | 69.20 |      | H0 |
| ANISOU 9700 HB ILE D 10   | 9470    | 10310  | 6520   | -640  | 130   | 710  | H0 |
| ATOM 9701 HG12 ILE D 10   | -29.176 | 22.878 | 1.377  | 1.00  | 68.18 |      | H0 |
| ANISOU 9701 HG12 ILE D 10 | 9490    | 9780   | 6630   | -600  | 430   | 860  | H0 |
| ATOM 9702 HG13 ILE D 10   | -30.431 | 23.395 | 0.559  | 1.00  | 70.18 |      | H0 |
| ANISOU 9702 HG13 ILE D 10 | 9730    | 10220  | 6720   | -490  | 300   | 1030 | H0 |
| ATOM 9703 HG21 ILE D 10   | -30.290 | 19.483 | 1.716  | 1.00  | 67.13 |      | H0 |
| ANISOU 9703 HG21 ILE D 10 | 9230    | 9910   | 6370   | -820  | 240   | 390  | H0 |
| ATOM 9704 HG22 ILE D 10   | -29.834 | 20.652 | 2.685  | 1.00  | 66.06 |      | H0 |
| ANISOU 9704 HG22 ILE D 10 | 9080    | 9570   | 6450   | -730  | 320   | 500  | H0 |
| ATOM 9705 HG23 ILE D 10   | -28.883 | 20.187 | 1.505  | 1.00  | 67.00 |      | H0 |
| ANISOU 9705 HG23 ILE D 10 | 9300    | 9760   | 6400   | -800  | 400   | 460  | H0 |
| ATOM 9706 HD11 ILE D 10   | -31.752 | 22.948 | 2.548  | 1.00  | 67.96 |      | H0 |
| ANISOU 9706 HD11 ILE D 10 | 9250    | 9880   | 6700   | -460  | 180   | 880  | H0 |
| ATOM 9707 HD12 ILE D 10   | -30.749 | 24.173 | 2.665  | 1.00  | 68.07 |      | H0 |
| ANISOU 9707 HD12 ILE D 10 | 9370    | 9670   | 6830   | -410  | 320   | 1000 | H0 |
| ATOM 9708 HD13 ILE D 10   | -30.374 | 22.776 | 3.318  | 1.00  | 66.16 |      | H0 |
| ANISOU 9708 HD13 ILE D 10 | 9070    | 9430   | 6640   | -540  | 320   | 760  | H0 |
| ATOM 9709 N ARG D 11      | -30.863 | 18.821 | -1.091 | 1.00  | 71.88 |      | N0 |
| ANISOU 9709 N ARG D 11    | 9940    | 10950  | 6420   | -880  | 110   | 390  | N0 |
| ATOM 9710 CA ARG D 11     | -30.795 | 17.346 | -1.290 | 1.00  | 72.66 |      | C0 |
| ANISOU 9710 CA ARG D 11   | 10080   | 11090  | 6440   | -1010 | 90    | 150  | C0 |
| ATOM 9711 C ARG D 11      | -30.173 | 16.994 | -2.649 | 1.00  | 75.38 |      | C0 |
| ANISOU 9711 C ARG D 11    | 10550   | 11570  | 6520   | -1040 | 140   | 100  | C0 |
| ATOM 9712 O ARG D 11      | -29.537 | 15.921 | -2.731 | 1.00  | 75.18 |      | O0 |
| ANISOU 9712 O ARG D 11    | 10600   | 11490  | 6480   | -1120 | 210   | -100 | O0 |
| ATOM 9713 CB ARG D 11     | -32.189 | 16.730 | -1.143 | 1.00  | 73.24 |      | C0 |
| ANISOU 9713 CB ARG D 11   | 10050   | 11310  | 6470   | -1080 | -90   | 80   | C0 |
| ATOM 9714 CG ARG D 11     | -32.714 | 16.795 | 0.281  | 1.00  | 71.70 |      | C0 |
| ANISOU 9714 CG ARG D 11   | 9720    | 10990  | 6530   | -1060 | -120  | 80   | C0 |
| ATOM 9715 CD ARG D 11     | -34.052 | 16.111 | 0.461  | 1.00  | 72.56 |      | C0 |
| ANISOU 9715 CD ARG D 11   | 9710    | 11250  | 6600   | -1150 | -290  | 10   | C0 |
| ATOM 9716 NE ARG D 11     | -34.319 | 15.902 | 1.877  | 1.00  | 70.81 |      | N0 |
| ANISOU 9716 NE ARG D 11   | 9390    | 10890  | 6620   | -1160 | -280  | -20  | N0 |
| ATOM 9717 CZ ARG D 11     | -35.506 | 15.617 | 2.402  | 1.00  | 71.29 |      | C0 |
| ANISOU 9717 CZ ARG D 11   | 9300    | 11060  | 6720   | -1210 | -400  | -30  | C0 |
| ATOM 9718 NH1 ARG D 11    | -36.577 | 15.499 | 1.633  | 1.00  | 73.10 |      | N0 |

|                           |         |        |        |       |       |      |    |
|---------------------------|---------|--------|--------|-------|-------|------|----|
| ANISOU 9718 NH1 ARG D 11  | 9450    | 11540  | 6780   | -1250 | -560  | -10  | N0 |
| ATOM 9719 NH2 ARG D 11    | -35.617 | 15.458 | 3.709  | 1.00  | 69.31 |      | N0 |
| ANISOU 9719 NH2 ARG D 11  | 8980    | 10680  | 6680   | -1210 | -370  | -50  | N0 |
| ATOM 9720 H ARG D 11      | -31.714 | 19.145 | -1.081 | 1.00  | 72.61 |      | H0 |
| ANISOU 9720 H ARG D 11    | 9970    | 11130  | 6490   | -840  | 20    | 470  | H0 |
| ATOM 9721 HA ARG D 11     | -30.218 | 16.974 | -0.584 | 1.00  | 71.30 |      | H0 |
| ANISOU 9721 HA ARG D 11   | 9910    | 10770  | 6410   | -1040 | 170   | 60   | H0 |
| ATOM 9722 HB2 ARG D 11    | -32.809 | 17.203 | -1.736 | 1.00  | 74.65 |      | H0 |
| ANISOU 9722 HB2 ARG D 11  | 10190   | 11650  | 6520   | -1040 | -180  | 190  | H0 |
| ATOM 9723 HB3 ARG D 11    | -32.151 | 15.793 | -1.427 | 1.00  | 73.72 |      | H0 |
| ANISOU 9723 HB3 ARG D 11  | 10150   | 11410  | 6450   | -1170 | -110  | -70  | H0 |
| ATOM 9724 HG2 ARG D 11    | -32.061 | 16.376 | 0.881  | 1.00  | 70.39 |      | H0 |
| ANISOU 9724 HG2 ARG D 11  | 9590    | 10670  | 6480   | -1090 | -40   | -10  | H0 |
| ATOM 9725 HG3 ARG D 11    | -32.803 | 17.736 | 0.547  | 1.00  | 71.43 |      | H0 |
| ANISOU 9725 HG3 ARG D 11  | 9650    | 10920  | 6560   | -960  | -110  | 230  | H0 |
| ATOM 9726 HD2 ARG D 11    | -34.758 | 16.668 | 0.070  | 1.00  | 73.67 |      | H0 |
| ANISOU 9726 HD2 ARG D 11  | 9790    | 11540  | 6660   | -1100 | -380  | 130  | H0 |
| ATOM 9727 HD3 ARG D 11    | -34.047 | 15.248 | -0.005 | 1.00  | 73.26 |      | H0 |
| ANISOU 9727 HD3 ARG D 11  | 9850    | 11390  | 6590   | -1260 | -320  | -120 | H0 |
| ATOM 9728 HE ARG D 11     | -33.646 | 15.972 | 2.428  | 1.00  | 69.57 |      | H0 |
| ANISOU 9728 HE ARG D 11   | 9270    | 10580  | 6580   | -1140 | -190  | -40  | H0 |
| ATOM 9729 HH11 ARG D 11   | -36.513 | 15.605 | 0.764  | 1.00  | 74.33 |      | H0 |
| ANISOU 9729 HH11 ARG D 11 | 9660    | 11800  | 6780   | -1250 | -580  | 10   | H0 |
| ATOM 9730 HH12 ARG D 11   | -37.356 | 15.310 | 1.995  | 1.00  | 73.45 |      | H0 |
| ANISOU 9730 HH12 ARG D 11 | 9380    | 11670  | 6860   | -1290 | -630  | -10  | H0 |
| ATOM 9731 HH21 ARG D 11   | -34.907 | 15.535 | 4.225  | 1.00  | 68.17 |      | H0 |
| ANISOU 9731 HH21 ARG D 11 | 8880    | 10380  | 6650   | -1180 | -270  | -70  | H0 |
| ATOM 9732 HH22 ARG D 11   | -36.400 | 15.266 | 4.063  | 1.00  | 69.69 |      | H0 |
| ANISOU 9732 HH22 ARG D 11 | 8920    | 10800  | 6760   | -1240 | -440  | -50  | H0 |
| ATOM 9733 N GLN D 12      | -30.341 | 17.843 | -3.670 | 1.00  | 77.65 |      | N0 |
| ANISOU 9733 N GLN D 12    | 10870   | 12020  | 6620   | -970  | 120   | 280  | N0 |
| ATOM 9734 CA GLN D 12     | -29.784 | 17.613 | -5.033 | 1.00  | 80.34 |      | C0 |
| ANISOU 9734 CA GLN D 12   | 11330   | 12520  | 6670   | -990  | 180   | 260  | C0 |
| ATOM 9735 C GLN D 12      | -28.253 | 17.655 | -4.974 | 1.00  | 79.69 |      | C0 |
| ANISOU 9735 C GLN D 12    | 11330   | 12280  | 6670   | -980  | 400   | 230  | C0 |
| ATOM 9736 O GLN D 12      | -27.617 | 16.836 | -5.671 | 1.00  | 81.17 |      | O0 |
| ANISOU 9736 O GLN D 12    | 11610   | 12530  | 6690   | -1030 | 470   | 80   | O0 |
| ATOM 9737 CB GLN D 12     | -30.280 | 18.653 | -6.042 | 1.00  | 82.97 |      | C0 |
| ANISOU 9737 CB GLN D 12   | 11680   | 13060  | 6790   | -910  | 120   | 500  | C0 |
| ATOM 9738 CG GLN D 12     | -31.789 | 18.662 | -6.250 | 1.00  | 84.82 |      | C0 |
| ANISOU 9738 CG GLN D 12   | 11810   | 13500  | 6910   | -900  | -110  | 540  | C0 |
| ATOM 9739 CD GLN D 12     | -32.379 | 17.283 | -6.421 | 1.00  | 85.46 |      | C0 |
| ANISOU 9739 CD GLN D 12   | 11880   | 13710  | 6890   | -1050 | -230  | 270  | C0 |
| ATOM 9740 OE1 GLN D 12    | -32.990 | 16.734 | -5.505 | 1.00  | 84.79 |      | O0 |
| ANISOU 9740 OE1 GLN D 12  | 11700   | 13550  | 6970   | -1110 | -310  | 160  | O0 |
| ATOM 9741 NE2 GLN D 12    | -32.193 | 16.710 | -7.600 | 1.00  | 86.84 |      | N0 |
| ANISOU 9741 NE2 GLN D 12  | 12160   | 14070  | 6770   | -1110 | -240  | 170  | N0 |
| ATOM 9742 H GLN D 12      | -30.813 | 18.618 | -3.592 | 1.00  | 77.94 |      | H0 |
| ANISOU 9742 H GLN D 12    | 10860   | 12080  | 6680   | -900  | 80    | 430  | H0 |
| ATOM 9743 HA GLN D 12     | -30.060 | 16.717 | -5.334 | 1.00  | 80.95 |      | H0 |
| ANISOU 9743 HA GLN D 12   | 11430   | 12680  | 6640   | -1070 | 120   | 90   | H0 |
| ATOM 9744 HB2 GLN D 12    | -29.997 | 19.540 | -5.735 | 1.00  | 82.49 |      | H0 |
| ANISOU 9744 HB2 GLN D 12  | 11610   | 12890  | 6850   | -830  | 180   | 660  | H0 |
| ATOM 9745 HB3 GLN D 12    | -29.842 | 18.482 | -6.902 | 1.00  | 84.33 |      | H0 |

|                           |         |        |        |       |       |      |    |
|---------------------------|---------|--------|--------|-------|-------|------|----|
| ANISOU 9745 HB3 GLN D 12  | 11930   | 13330  | 6770   | -920  | 170   | 480  | H0 |
| ATOM 9746 HG2 GLN D 12    | -32.214 | 19.097 | -5.485 | 1.00  | 83.64 |      | H0 |
| ANISOU 9746 HG2 GLN D 12  | 11580   | 13260  | 6940   | -850  | -140  | 610  | H0 |
| ATOM 9747 HG3 GLN D 12    | -31.997 | 19.196 | -7.047 | 1.00  | 86.43 |      | H0 |
| ANISOU 9747 HG3 GLN D 12  | 12040   | 13860  | 6940   | -840  | -140  | 680  | H0 |
| ATOM 9748 HE21 GLN D 12   | -32.536 | 15.911 | -7.762 | 1.00  | 87.66 |      | H0 |
| ANISOU 9748 HE21 GLN D 12 | 12270   | 14250  | 6790   | -1200 | -320  | 10   | H0 |
| ATOM 9749 HE22 GLN D 12   | -31.726 | 17.124 | -8.226 | 1.00  | 87.98 |      | H0 |
| ANISOU 9749 HE22 GLN D 12 | 12370   | 14270  | 6790   | -1060 | -170  | 260  | H0 |
| ATOM 9750 N THR D 13      | -27.693 | 18.584 | -4.190 | 1.00  | 77.90 |      | N0 |
| ANISOU 9750 N THR D 13    | 11070   | 11870  | 6670   | -930  | 500   | 380  | N0 |
| ATOM 9751 CA THR D 13     | -26.230 | 18.847 | -4.097 | 1.00  | 77.25 |      | C0 |
| ANISOU 9751 CA THR D 13   | 11030   | 11650  | 6670   | -920  | 700   | 400  | C0 |
| ATOM 9752 C THR D 13      | -25.655 | 18.193 | -2.833 | 1.00  | 74.39 |      | C0 |
| ANISOU 9752 C THR D 13    | 10610   | 11080  | 6570   | -960  | 760   | 240  | C0 |
| ATOM 9753 O THR D 13      | -24.538 | 17.654 | -2.918 | 1.00  | 73.79 |      | O0 |
| ANISOU 9753 O THR D 13    | 10570   | 10970  | 6500   | -980  | 900   | 130  | O0 |
| ATOM 9754 CB THR D 13     | -25.928 | 20.351 | -4.165 | 1.00  | 77.70 |      | C0 |
| ANISOU 9754 CB THR D 13   | 11090   | 11650  | 6790   | -850  | 770   | 670  | C0 |
| ATOM 9755 OG1 THR D 13    | -26.623 | 21.008 | -3.105 | 1.00  | 77.13 |      | O0 |
| ANISOU 9755 OG1 THR D 13  | 10940   | 11430  | 6940   | -810  | 690   | 750  | O0 |
| ATOM 9756 CG2 THR D 13    | -26.323 | 20.971 | -5.488 | 1.00  | 80.25 |      | C0 |
| ANISOU 9756 CG2 THR D 13  | 11480   | 12180  | 6830   | -810  | 740   | 860  | C0 |
| ATOM 9757 H THR D 13      | -28.178 | 19.142 | -3.659 | 1.00  | 77.34 |      | H0 |
| ANISOU 9757 H THR D 13    | 10940   | 11740  | 6710   | -890  | 440   | 470  | H0 |
| ATOM 9758 HA THR D 13     | -25.804 | 18.421 | -4.876 | 1.00  | 78.32 |      | H0 |
| ANISOU 9758 HA THR D 13   | 11230   | 11890  | 6640   | -940  | 760   | 340  | H0 |
| ATOM 9759 HB THR D 13     | -24.958 | 20.476 | -4.034 | 1.00  | 77.50 |      | H0 |
| ANISOU 9759 HB THR D 13   | 11080   | 11540  | 6830   | -870  | 910   | 680  | H0 |
| ATOM 9760 HG21 THR D 13   | -25.853 | 20.520 | -6.212 | 1.00  | 81.28 |      | H0 |
| ANISOU 9760 HG21 THR D 13 | 11670   | 12420  | 6800   | -840  | 800   | 800  | H0 |
| ATOM 9761 HG22 THR D 13   | -26.087 | 21.916 | -5.488 | 1.00  | 80.62 |      | H0 |
| ANISOU 9761 HG22 THR D 13 | 11540   | 12150  | 6940   | -770  | 800   | 1040 | H0 |
| ATOM 9762 HG23 THR D 13   | -27.283 | 20.878 | -5.618 | 1.00  | 80.72 |      | H0 |
| ANISOU 9762 HG23 THR D 13 | 11510   | 12330  | 6820   | -790  | 600   | 860  | H0 |
| ATOM 9763 N SER D 14      | -26.372 | 18.236 | -1.705 | 1.00  | 72.94 |      | N0 |
| ANISOU 9763 N SER D 14    | 10340   | 10790  | 6580   | -950  | 660   | 220  | N0 |
| ATOM 9764 CA SER D 14     | -25.892 | 17.689 | -0.407 | 1.00  | 70.43 |      | C0 |
| ANISOU 9764 CA SER D 14   | 9970    | 10280  | 6510   | -980  | 710   | 90   | C0 |
| ATOM 9765 C SER D 14      | -25.638 | 16.185 | -0.552 | 1.00  | 70.78 |      | C0 |
| ANISOU 9765 C SER D 14    | 10060   | 10340  | 6490   | -1040 | 720   | -140 | C0 |
| ATOM 9766 O SER D 14      | -26.554 | 15.463 | -1.005 | 1.00  | 72.04 |      | O0 |
| ANISOU 9766 O SER D 14    | 10240   | 10610  | 6520   | -1090 | 600   | -240 | O0 |
| ATOM 9767 CB SER D 14     | -26.836 | 17.975 | 0.730  | 1.00  | 68.34 |      | C0 |
| ANISOU 9767 CB SER D 14   | 9600    | 9930   | 6430   | -960  | 600   | 120  | C0 |
| ATOM 9768 OG SER D 14     | -26.260 | 17.565 | 1.959  | 1.00  | 65.15 |      | O0 |
| ANISOU 9768 OG SER D 14   | 9150    | 9360   | 6240   | -980  | 650   | 20   | O0 |
| ATOM 9769 H SER D 14      | -27.200 | 18.608 | -1.644 | 1.00  | 73.00 |      | H0 |
| ANISOU 9769 H SER D 14    | 10310   | 10840  | 6590   | -930  | 560   | 300  | H0 |
| ATOM 9770 HA SER D 14     | -25.023 | 18.127 | -0.202 | 1.00  | 70.05 |      | H0 |
| ANISOU 9770 HA SER D 14   | 9920    | 10150  | 6550   | -960  | 820   | 140  | H0 |
| ATOM 9771 HB2 SER D 14    | -27.027 | 18.939 | 0.764  | 1.00  | 68.37 |      | H0 |
| ANISOU 9771 HB2 SER D 14  | 9590    | 9920   | 6460   | -910  | 590   | 270  | H0 |
| ATOM 9772 HB3 SER D 14    | -27.682 | 17.495 | 0.586  | 1.00  | 68.56 |      | H0 |

|                           |         |        |        |       |       |       |    |
|---------------------------|---------|--------|--------|-------|-------|-------|----|
| ANISOU 9772 HB3 SER D 14  | 9620    | 10050  | 6380   | -990  | 490   | 70    | H0 |
| ATOM 9773 N ARG D 15      | -24.421 | 15.755 | -0.208 | 1.00  | 69.98 |       | N0 |
| ANISOU 9773 N ARG D 15    | 9970    | 10140  | 6480   | -1030 | 870   | -220  | N0 |
| ATOM 9774 CA ARG D 15     | -23.996 | 14.334 | -0.150 | 1.00  | 70.18 |       | C0 |
| ANISOU 9774 CA ARG D 15   | 10040   | 10120  | 6500   | -1060 | 910   | -440  | C0 |
| ATOM 9775 C ARG D 15      | -23.642 | 14.019 | 1.300  | 1.00  | 65.88 |       | C0 |
| ANISOU 9775 C ARG D 15    | 9420    | 9390   | 6220   | -1050 | 930   | -490  | C0 |
| ATOM 9776 O ARG D 15      | -22.503 | 14.209 | 1.719  | 1.00  | 65.68 |       | O0 |
| ANISOU 9776 O ARG D 15    | 9360    | 9290   | 6300   | -1010 | 1060  | -470  | O0 |
| ATOM 9777 CB ARG D 15     | -22.830 | 14.096 | -1.116 | 1.00  | 73.48 |       | C0 |
| ANISOU 9777 CB ARG D 15   | 10540   | 10610  | 6770   | -1030 | 1070  | -490  | C0 |
| ATOM 9778 CG ARG D 15     | -23.183 | 14.283 | -2.587 | 1.00  | 77.56 |       | C0 |
| ANISOU 9778 CG ARG D 15   | 11140   | 11330  | 6990   | -1040 | 1050  | -460  | C0 |
| ATOM 9779 CD ARG D 15     | -24.306 | 13.382 | -3.079 | 1.00  | 80.16 |       | C0 |
| ANISOU 9779 CD ARG D 15   | 11540   | 11750  | 7160   | -1100 | 900   | -610  | C0 |
| ATOM 9780 NE ARG D 15     | -24.134 | 11.981 | -2.704 | 1.00  | 81.48 |       | N0 |
| ANISOU 9780 NE ARG D 15   | 11770   | 11800  | 7390   | -1130 | 910   | -840  | N0 |
| ATOM 9781 CZ ARG D 15     | -23.312 | 11.112 | -3.300 | 1.00  | 84.45 |       | C0 |
| ANISOU 9781 CZ ARG D 15   | 12250   | 12180  | 7660   | -1100 | 1030  | -1010 | C0 |
| ATOM 9782 NH1 ARG D 15    | -22.553 | 11.480 | -4.321 | 1.00  | 85.94 |       | N0 |
| ANISOU 9782 NH1 ARG D 15  | 12490   | 12510  | 7660   | -1050 | 1160  | -960  | N0 |
| ATOM 9783 NH2 ARG D 15    | -23.252 | 9.864  | -2.865 | 1.00  | 85.32 |       | N0 |
| ANISOU 9783 NH2 ARG D 15  | 12420   | 12140  | 7850   | -1120 | 1040  | -1210 | N0 |
| ATOM 9784 H ARG D 15      | -23.754 | 16.332 | 0.019  | 1.00  | 69.67 |       | H0 |
| ANISOU 9784 H ARG D 15    | 9900    | 10040  | 6530   | -1010 | 950   | -150  | H0 |
| ATOM 9785 HA ARG D 15     | -24.752 | 13.768 | -0.423 | 1.00  | 70.61 |       | H0 |
| ANISOU 9785 HA ARG D 15   | 10130   | 10230  | 6470   | -1100 | 810   | -520  | H0 |
| ATOM 9786 HB2 ARG D 15    | -22.107 | 14.716 | -0.887 | 1.00  | 73.01 |       | H0 |
| ANISOU 9786 HB2 ARG D 15  | 10430   | 10510  | 6790   | -1000 | 1160  | -390  | H0 |
| ATOM 9787 HB3 ARG D 15    | -22.498 | 13.184 | -0.984 | 1.00  | 73.45 |       | H0 |
| ANISOU 9787 HB3 ARG D 15  | 10570   | 10550  | 6790   | -1030 | 1110  | -630  | H0 |
| ATOM 9788 HG2 ARG D 15    | -23.444 | 15.217 | -2.734 | 1.00  | 77.58 |       | H0 |
| ANISOU 9788 HG2 ARG D 15  | 11120   | 11380  | 6980   | -1030 | 1020  | -300  | H0 |
| ATOM 9789 HG3 ARG D 15    | -22.383 | 14.112 | -3.129 | 1.00  | 78.40 |       | H0 |
| ANISOU 9789 HG3 ARG D 15  | 11300   | 11480  | 7010   | -1010 | 1170  | -490  | H0 |
| ATOM 9790 HD2 ARG D 15    | -25.156 | 13.706 | -2.712 | 1.00  | 79.54 |       | H0 |
| ANISOU 9790 HD2 ARG D 15  | 11410   | 11670  | 7140   | -1120 | 780   | -540  | H0 |
| ATOM 9791 HD3 ARG D 15    | -24.363 | 13.448 | -4.056 | 1.00  | 81.76 |       | H0 |
| ANISOU 9791 HD3 ARG D 15  | 11810   | 12090  | 7160   | -1100 | 900   | -600  | H0 |
| ATOM 9792 HE ARG D 15     | -24.611 | 11.684 | -2.038 | 1.00  | 80.72 |       | H0 |
| ANISOU 9792 HE ARG D 15   | 11640   | 11620  | 7410   | -1170 | 840   | -880  | H0 |
| ATOM 9793 HH11 ARG D 15   | -22.583 | 12.304 | -4.621 | 1.00  | 86.06 |       | H0 |
| ANISOU 9793 HH11 ARG D 15 | 12470   | 12610  | 7620   | -1040 | 1160  | -820  | H0 |
| ATOM 9794 HH12 ARG D 15   | -22.017 | 10.895 | -4.701 | 1.00  | 86.84 |       | H0 |
| ANISOU 9794 HH12 ARG D 15 | 12670   | 12620  | 7700   | -1020 | 1250  | -1080 | H0 |
| ATOM 9795 HH21 ARG D 15   | -23.752 | 9.610  | -2.185 | 1.00  | 83.95 |       | H0 |
| ANISOU 9795 HH21 ARG D 15 | 12210   | 11880  | 7800   | -1160 | 960   | -1230 | H0 |
| ATOM 9796 HH22 ARG D 15   | -22.710 | 9.288  | -3.253 | 1.00  | 85.86 |       | H0 |
| ANISOU 9796 HH22 ARG D 15 | 12570   | 12200  | 7850   | -1090 | 1120  | -1320 | H0 |
| ATOM 9797 N PROD 16       | -24.618 | 13.557 | 2.116  | 1.00  | 62.87 |       | N0 |
| ANISOU 9797 N PROD 16     | 9000    | 8950   | 5940   | -1090 | 810   | -540  | N0 |
| ATOM 9798 CA PROD 16      | -24.402 | 13.349 | 3.551  | 1.00  | 59.88 |       | C0 |
| ANISOU 9798 CA PROD 16    | 8540    | 8420   | 5790   | -1080 | 820   | -560  | C0 |
| ATOM 9799 C PROD 16       | -23.190 | 12.491 | 3.957  | 1.00  | 58.74 |       | C0 |



|                          |         |        |       |       |       |       |    |
|--------------------------|---------|--------|-------|-------|-------|-------|----|
| ANISOU 9799 C PRO D 16   | 8410    | 8170   | 5740  | -1040 | 940   | -670  | C0 |
| ATOM 9800 O PRO D 16     | -22.783 | 12.595 | 5.101 | 1.00  | 55.95 |       | O0 |
| ANISOU 9800 O PRO D 16   | 7980    | 7720   | 5560  | -1010 | 970   | -650  | O0 |
| ATOM 9801 CB PRO D 16    | -25.692 | 12.641 | 3.992 | 1.00  | 59.70 |       | C0 |
| ANISOU 9801 CB PRO D 16  | 8500    | 8390   | 5790  | -1140 | 670   | -630  | C0 |
| ATOM 9802 CG PRO D 16    | -26.735 | 13.137 | 3.019 | 1.00  | 61.31 |       | C0 |
| ANISOU 9802 CG PRO D 16  | 8720    | 8760   | 5820  | -1180 | 560   | -570  | C0 |
| ATOM 9803 CD PRO D 16    | -25.998 | 13.254 | 1.704 | 1.00  | 63.07 |       | C0 |
| ANISOU 9803 CD PRO D 16  | 9040    | 9080   | 5850  | -1150 | 650   | -570  | C0 |
| ATOM 9804 HA PRO D 16    | -24.348 | 14.230 | 3.997 | 1.00  | 59.18 |       | H0 |
| ANISOU 9804 HA PRO D 16  | 8390    | 8310   | 5790  | -1050 | 820   | -450  | H0 |
| ATOM 9805 HB2 PRO D 16   | -25.597 | 11.666 | 3.933 | 1.00  | 60.15 |       | H0 |
| ANISOU 9805 HB2 PRO D 16 | 8620    | 8400   | 5830  | -1170 | 680   | -750  | H0 |
| ATOM 9806 HB3 PRO D 16   | -25.929 | 12.882 | 4.912 | 1.00  | 58.63 |       | H0 |
| ANISOU 9806 HB3 PRO D 16 | 8290    | 8190   | 5790  | -1140 | 640   | -590  | H0 |
| ATOM 9807 HG2 PRO D 16   | -27.476 | 12.502 | 2.948 | 1.00  | 61.76 |       | H0 |
| ANISOU 9807 HG2 PRO D 16 | 8780    | 8850   | 5830  | -1240 | 480   | -640  | H0 |
| ATOM 9808 HG3 PRO D 16   | -27.088 | 14.007 | 3.299 | 1.00  | 60.83 |       | H0 |
| ANISOU 9808 HG3 PRO D 16 | 8590    | 8720   | 5800  | -1140 | 530   | -450  | H0 |
| ATOM 9809 HD2 PRO D 16   | -26.039 | 12.419 | 1.202 | 1.00  | 64.10 |       | H0 |
| ANISOU 9809 HD2 PRO D 16 | 9240    | 9240   | 5880  | -1190 | 640   | -700  | H0 |
| ATOM 9810 HD3 PRO D 16   | -26.369 | 13.972 | 1.159 | 1.00  | 63.86 |       | H0 |
| ANISOU 9810 HD3 PRO D 16 | 9130    | 9280   | 5850  | -1140 | 610   | -470  | H0 |
| ATOM 9811 N ASP D 17     | -22.661 | 11.665 | 3.045 | 1.00  | 59.23 |       | N0 |
| ANISOU 9811 N ASP D 17   | 8580    | 8270   | 5660  | -1030 | 1020  | -790  | N0 |
| ATOM 9812 CA ASP D 17    | -21.519 | 10.747 | 3.308 | 1.00  | 59.25 |       | C0 |
| ANISOU 9812 CA ASP D 17  | 8610    | 8180   | 5730  | -960  | 1150  | -900  | C0 |
| ATOM 9813 C ASP D 17     | -20.223 | 11.346 | 2.743 | 1.00  | 58.93 |       | C0 |
| ANISOU 9813 C ASP D 17   | 8540    | 8210   | 5640  | -900  | 1300  | -840  | C0 |
| ATOM 9814 O ASP D 17     | -19.166 | 10.709 | 2.913 | 1.00  | 58.90 |       | O0 |
| ANISOU 9814 O ASP D 17   | 8530    | 8170   | 5680  | -820  | 1420  | -910  | O0 |
| ATOM 9815 CB ASP D 17    | -21.798 | 9.351  | 2.741 | 1.00  | 61.59 |       | C0 |
| ANISOU 9815 CB ASP D 17  | 9040    | 8440   | 5920  | -980  | 1140  | -1090 | C0 |
| ATOM 9816 CG ASP D 17    | -22.979 | 8.628  | 3.377 | 1.00  | 62.45 |       | C0 |
| ANISOU 9816 CG ASP D 17  | 9170    | 8450   | 6100  | -1070 | 1000  | -1160 | C0 |
| ATOM 9817 OD1 ASP D 17   | -23.393 | 9.022  | 4.498 | 1.00  | 61.21 |       | O0 |
| ANISOU 9817 OD1 ASP D 17 | 8910    | 8240   | 6110  | -1090 | 930   | -1060 | O0 |
| ATOM 9818 OD2 ASP D 17   | -23.478 | 7.666  | 2.747 | 1.00  | 65.15 |       | O0 |
| ANISOU 9818 OD2 ASP D 17 | 9640    | 8780   | 6330  | -1140 | 950   | -1300 | O0 |
| ATOM 9819 H ASP D 17     | -22.987 | 11.598 | 2.198 | 1.00  | 60.52 |       | H0 |
| ANISOU 9819 H ASP D 17   | 8800    | 8510   | 5680  | -1050 | 990   | -810  | H0 |
| ATOM 9820 HA ASP D 17    | -21.416 | 10.661 | 4.285 | 1.00  | 58.14 |       | H0 |
| ANISOU 9820 HA ASP D 17  | 8400    | 7950   | 5740  | -950  | 1140  | -880  | H0 |
| ATOM 9821 HB2 ASP D 17   | -21.974 | 9.432  | 1.784 | 1.00  | 62.91 |       | H0 |
| ANISOU 9821 HB2 ASP D 17 | 9270    | 8700   | 5930  | -1010 | 1130  | -1110 | H0 |
| ATOM 9822 HB3 ASP D 17   | -21.003 | 8.795  | 2.860 | 1.00  | 61.97 |       | H0 |
| ANISOU 9822 HB3 ASP D 17 | 9110    | 8420   | 6010  | -920  | 1230  | -1160 | H0 |
| ATOM 9823 N VAL D 18     | -20.290 | 12.528 | 2.119 | 1.00  | 58.33 |       | N0 |
| ANISOU 9823 N VAL D 18   | 8440    | 8250   | 5470  | -920  | 1310  | -700  | N0 |
| ATOM 9824 CA VAL D 18    | -19.118 | 13.230 | 1.512 | 1.00  | 58.88 |       | C0 |
| ANISOU 9824 CA VAL D 18  | 8470    | 8410   | 5490  | -880  | 1460  | -610  | C0 |
| ATOM 9825 C VAL D 18     | -18.764 | 14.451 | 2.367 | 1.00  | 57.35 |       | C0 |
| ANISOU 9825 C VAL D 18   | 8160    | 8160   | 5470  | -900  | 1470  | -450  | C0 |
| ATOM 9826 O VAL D 18     | -19.613 | 15.356 | 2.509 | 1.00  | 56.80 |       | O0 |

|                           |         |        |        |      |       |      |    |
|---------------------------|---------|--------|--------|------|-------|------|----|
| ANISOU 9826 O VAL D 18    | 8080    | 8080   | 5420   | -950 | 1370  | -330 | O0 |
| ATOM 9827 CB VAL D 18     | -19.395 | 13.634 | 0.053  | 1.00 | 60.94 |      | C0 |
| ANISOU 9827 CB VAL D 18   | 8830    | 8830   | 5500   | -900 | 1470  | -560 | C0 |
| ATOM 9828 CG1 VAL D 18    | -18.209 | 14.354 | -0.572 | 1.00 | 62.12 |      | C0 |
| ANISOU 9828 CG1 VAL D 18  | 8940    | 9080   | 5590   | -880 | 1640  | -450 | C0 |
| ATOM 9829 CG2 VAL D 18    | -19.791 | 12.431 | -0.787 | 1.00 | 62.54 |      | C0 |
| ANISOU 9829 CG2 VAL D 18  | 9160    | 9090   | 5510   | -900 | 1450  | -740 | C0 |
| ATOM 9830 H VAL D 18      | -21.068 | 12.988 | 2.023  | 1.00 | 58.34 |      | H0 |
| ANISOU 9830 H VAL D 18    | 8440    | 8280   | 5450   | -960 | 1220  | -640 | H0 |
| ATOM 9831 HA VAL D 18     | -18.360 | 12.619 | 1.520  | 1.00 | 59.33 |      | H0 |
| ANISOU 9831 HA VAL D 18   | 8530    | 8450   | 5560   | -830 | 1550  | -690 | H0 |
| ATOM 9832 HB VAL D 18     | -20.158 | 14.261 | 0.061  | 1.00 | 60.64 |      | H0 |
| ANISOU 9832 HB VAL D 18   | 8780    | 8810   | 5450   | -940 | 1380  | -470 | H0 |
| ATOM 9833 HG11 VAL D 18   | -18.189 | 15.277 | -0.264 | 1.00 | 61.57 |      | H0 |
| ANISOU 9833 HG11 VAL D 18 | 8810    | 8990   | 5600   | -910 | 1640  | -320 | H0 |
| ATOM 9834 HG12 VAL D 18   | -18.294 | 14.338 | -1.541 | 1.00 | 63.51 |      | H0 |
| ANISOU 9834 HG12 VAL D 18 | 9190    | 9370   | 5580   | -880 | 1670  | -450 | H0 |
| ATOM 9835 HG13 VAL D 18   | -17.384 | 13.908 | -0.312 | 1.00 | 62.13 |      | H0 |
| ANISOU 9835 HG13 VAL D 18 | 8900    | 9060   | 5650   | -840 | 1740  | -510 | H0 |
| ATOM 9836 HG21 VAL D 18   | -19.032 | 11.828 | -0.868 | 1.00 | 63.04 |      | H0 |
| ANISOU 9836 HG21 VAL D 18 | 9240    | 9140   | 5570   | -850 | 1560  | -830 | H0 |
| ATOM 9837 HG22 VAL D 18   | -20.064 | 12.731 | -1.671 | 1.00 | 63.68 |      | H0 |
| ANISOU 9837 HG22 VAL D 18 | 9360    | 9350   | 5480   | -920 | 1440  | -710 | H0 |
| ATOM 9838 HG23 VAL D 18   | -20.531 | 11.965 | -0.362 | 1.00 | 61.90 |      | H0 |
| ANISOU 9838 HG23 VAL D 18 | 9100    | 8940   | 5480   | -930 | 1350  | -810 | H0 |
| ATOM 9839 N ILE D 19      | -17.544 | 14.466 | 2.907  | 1.00 | 56.57 |      | N0 |
| ANISOU 9839 N ILE D 19    | 7960    | 8040   | 5490   | -870 | 1580  | -450 | N0 |
| ATOM 9840 CA ILE D 19     | -16.978 | 15.593 | 3.701  | 1.00 | 55.32 |      | C0 |
| ANISOU 9840 CA ILE D 19   | 7680    | 7840   | 5500   | -910 | 1610  | -320 | C0 |
| ATOM 9841 C ILE D 19      | -16.826 | 16.802 | 2.776  | 1.00 | 56.38 |      | C0 |
| ANISOU 9841 C ILE D 19    | 7830    | 8050   | 5530   | -960 | 1670  | -160 | C0 |
| ATOM 9842 O ILE D 19      | -16.172 | 16.710 | 1.740  | 1.00 | 56.65 |      | O0 |
| ANISOU 9842 O ILE D 19    | 7900    | 8210   | 5420   | -950 | 1790  | -140 | O0 |
| ATOM 9843 CB ILE D 19     | -15.649 | 15.168 | 4.357  | 1.00 | 55.42 |      | C0 |
| ANISOU 9843 CB ILE D 19   | 7570    | 7850   | 5630   | -870 | 1720  | -370 | C0 |
| ATOM 9844 CG1 ILE D 19    | -15.202 | 16.174 | 5.417  | 1.00 | 54.58 |      | C0 |
| ANISOU 9844 CG1 ILE D 19  | 7340    | 7690   | 5710   | -930 | 1710  | -270 | C0 |
| ATOM 9845 CG2 ILE D 19    | -14.556 | 14.925 | 3.318  | 1.00 | 57.50 |      | C0 |
| ANISOU 9845 CG2 ILE D 19  | 7830    | 8250   | 5760   | -830 | 1890  | -380 | C0 |
| ATOM 9846 CD1 ILE D 19    | -14.126 | 15.646 | 6.328  | 1.00 | 54.77 |      | C0 |
| ANISOU 9846 CD1 ILE D 19  | 7230    | 7720   | 5860   | -880 | 1760  | -330 | C0 |
| ATOM 9847 H ILE D 19      | -16.976 | 13.759 | 2.831  | 1.00 | 57.04 |      | H0 |
| ANISOU 9847 H ILE D 19    | 8020    | 8110   | 5540   | -820 | 1650  | -530 | H0 |
| ATOM 9848 HA ILE D 19     | -17.609 | 15.814 | 4.406  | 1.00 | 54.31 |      | H0 |
| ANISOU 9848 HA ILE D 19   | 7540    | 7640   | 5460   | -930 | 1510  | -300 | H0 |
| ATOM 9849 HB ILE D 19     | -15.813 | 14.310 | 4.819  | 1.00 | 54.90 |      | H0 |
| ANISOU 9849 HB ILE D 19   | 7520    | 7740   | 5600   | -820 | 1680  | -460 | H0 |
| ATOM 9850 HG12 ILE D 19   | -14.869 | 16.980 | 4.968  | 1.00 | 55.42 |      | H0 |
| ANISOU 9850 HG12 ILE D 19 | 7430    | 7840   | 5790   | -980 | 1760  | -180 | H0 |
| ATOM 9851 HG13 ILE D 19   | -15.978 | 16.429 | 5.958  | 1.00 | 53.65 |      | H0 |
| ANISOU 9851 HG13 ILE D 19 | 7240    | 7500   | 5650   | -950 | 1600  | -260 | H0 |
| ATOM 9852 HG21 ILE D 19   | -14.942 | 14.532 | 2.517  | 1.00 | 58.19 |      | H0 |
| ANISOU 9852 HG21 ILE D 19 | 8020    | 8380   | 5710   | -810 | 1890  | -420 | H0 |
| ATOM 9853 HG22 ILE D 19   | -13.890 | 14.317 | 3.684  | 1.00 | 57.51 |      | H0 |

|                           |         |        |        |       |       |      |    |
|---------------------------|---------|--------|--------|-------|-------|------|----|
| ANISOU 9853 HG22 ILE D 19 | 7770    | 8260   | 5820   | -770  | 1950  | -440 | H0 |
| ATOM 9854 HG23 ILE D 19   | -14.128 | 15.768 | 3.089  | 1.00  | 57.96 |      | H0 |
| ANISOU 9854 HG23 ILE D 19 | 7840    | 8360   | 5820   | -880  | 1950  | -270 | H0 |
| ATOM 9855 HD11 ILE D 19   | -14.458 | 14.868 | 6.808  | 1.00  | 53.92 |      | H0 |
| ANISOU 9855 HD11 ILE D 19 | 7140    | 7560   | 5780   | -830  | 1710  | -410 | H0 |
| ATOM 9856 HD12 ILE D 19   | -13.875 | 16.335 | 6.964  | 1.00  | 54.17 |      | H0 |
| ANISOU 9856 HD12 ILE D 19 | 7070    | 7620   | 5890   | -930  | 1750  | -280 | H0 |
| ATOM 9857 HD13 ILE D 19   | -13.349 | 15.393 | 5.801  | 1.00  | 55.69 |      | H0 |
| ANISOU 9857 HD13 ILE D 19 | 7310    | 7920   | 5920   | -850  | 1870  | -340 | H0 |
| ATOM 9858 N PROD 20       | -17.442 | 17.965 | 3.100  | 1.00  | 55.71 |      | N0 |
| ANISOU 9858 N PROD 20     | 7750    | 7900   | 5520   | -1020 | 1590  | -30  | N0 |
| ATOM 9859 CA PROD 20      | -17.424 | 19.125 | 2.206  | 1.00  | 57.50 |      | C0 |
| ANISOU 9859 CA PROD 20    | 8020    | 8170   | 5650   | -1060 | 1640  | 150  | C0 |
| ATOM 9860 C PROD 20       | -16.148 | 19.978 | 2.282  | 1.00  | 58.57 |      | C0 |
| ANISOU 9860 C PROD 20     | 8070    | 8310   | 5880   | -1130 | 1780  | 250  | C0 |
| ATOM 9861 O PROD 20       | -16.259 | 21.162 | 2.523  | 1.00  | 58.30 |      | O0 |
| ANISOU 9861 O PROD 20     | 8040    | 8180   | 5930   | -1190 | 1760  | 390  | O0 |
| ATOM 9862 CB PROD 20      | -18.635 | 19.920 | 2.716  | 1.00  | 56.83 |      | C0 |
| ANISOU 9862 CB PROD 20    | 7970    | 7980   | 5640   | -1070 | 1490  | 230  | C0 |
| ATOM 9863 CG PROD 20      | -18.604 | 19.679 | 4.205  | 1.00  | 54.80 |      | C0 |
| ANISOU 9863 CG PROD 20    | 7620    | 7610   | 5600   | -1070 | 1440  | 130  | C0 |
| ATOM 9864 CD PROD 20      | -18.220 | 18.217 | 4.325  | 1.00  | 54.39 |      | C0 |
| ANISOU 9864 CD PROD 20    | 7550    | 7600   | 5520   | -1020 | 1460  | -30  | C0 |
| ATOM 9865 HA PROD 20      | -17.588 | 18.832 | 1.275  | 1.00  | 58.53 |      | H0 |
| ANISOU 9865 HA PROD 20    | 8220    | 8400   | 5620   | -1040 | 1660  | 150  | H0 |
| ATOM 9866 HB2 PROD 20     | -18.553 | 20.874 | 2.510  | 1.00  | 57.41 |      | H0 |
| ANISOU 9866 HB2 PROD 20   | 8050    | 8030   | 5730   | -1100 | 1520  | 360  | H0 |
| ATOM 9867 HB3 PROD 20     | -19.467 | 19.579 | 2.324  | 1.00  | 56.82 |      | H0 |
| ANISOU 9867 HB3 PROD 20   | 8020    | 8030   | 5540   | -1040 | 1410  | 210  | H0 |
| ATOM 9868 HG2 PROD 20     | -17.940 | 20.252 | 4.639  | 1.00  | 54.86 |      | H0 |
| ANISOU 9868 HG2 PROD 20   | 7570    | 7560   | 5710   | -1110 | 1490  | 180  | H0 |
| ATOM 9869 HG3 PROD 20     | -19.481 | 19.844 | 4.606  | 1.00  | 54.17 |      | H0 |
| ANISOU 9869 HG3 PROD 20   | 7550    | 7470   | 5550   | -1050 | 1340  | 140  | H0 |
| ATOM 9870 HD2 PROD 20     | -17.681 | 18.059 | 5.121  | 1.00  | 53.62 |      | H0 |
| ANISOU 9870 HD2 PROD 20   | 7370    | 7460   | 5540   | -1020 | 1480  | -80  | H0 |
| ATOM 9871 HD3 PROD 20     | -19.012 | 17.649 | 4.358  | 1.00  | 53.85 |      | H0 |
| ANISOU 9871 HD3 PROD 20   | 7520    | 7530   | 5410   | -1000 | 1380  | -100 | H0 |
| ATOM 9872 N THR D 21      | -14.979 | 19.366 | 2.059  | 1.00  | 60.25 |      | N0 |
| ANISOU 9872 N THR D 21    | 8210    | 8620   | 6070   | -1110 | 1910  | 190  | N0 |
| ATOM 9873 CA THR D 21     | -13.661 | 20.056 | 1.983  | 1.00  | 62.45 |      | C0 |
| ANISOU 9873 CA THR D 21   | 8380    | 8940   | 6400   | -1190 | 2070  | 280  | C0 |
| ATOM 9874 C THR D 21      | -13.681 | 21.040 | 0.803  | 1.00  | 65.28 |      | C0 |
| ANISOU 9874 C THR D 21    | 8820    | 9360   | 6620   | -1250 | 2140  | 470  | C0 |
| ATOM 9875 O THR D 21      | -14.139 | 20.645 | -0.284 | 1.00  | 65.63 |      | O0 |
| ANISOU 9875 O THR D 21    | 8970    | 9520   | 6450   | -1190 | 2150  | 470  | O0 |
| ATOM 9876 CB THR D 21     | -12.504 | 19.050 | 1.882  | 1.00  | 62.40 |      | C0 |
| ANISOU 9876 CB THR D 21   | 8270    | 9070   | 6370   | -1130 | 2200  | 170  | C0 |
| ATOM 9877 OG1 THR D 21    | -12.781 | 18.152 | 0.809  | 1.00  | 62.95 |      | O0 |
| ANISOU 9877 OG1 THR D 21  | 8450    | 9250   | 6220   | -1040 | 2230  | 90   | O0 |
| ATOM 9878 CG2 THR D 21    | -12.287 | 18.257 | 3.153  | 1.00  | 60.41 |      | C0 |
| ANISOU 9878 CG2 THR D 21  | 7920    | 8750   | 6280   | -1080 | 2130  | 30   | C0 |
| ATOM 9879 H THR D 21      | -14.908 | 18.469 | 1.927  | 1.00  | 60.20 |      | H0 |
| ANISOU 9879 H THR D 21    | 8210    | 8660   | 6000   | -1060 | 1920  | 80   | H0 |
| ATOM 9880 HA THR D 21     | -13.547 | 20.572 | 2.814  | 1.00  | 61.61 |      | H0 |

|                           |         |        |        |       |       |      |    |
|---------------------------|---------|--------|--------|-------|-------|------|----|
| ANISOU 9880 HA THR D 21   | 8210    | 8740   | 6450   | -1240 | 2030  | 310  | H0 |
| ATOM 9881 HB THR D 21     | -11.678 | 19.548 | 1.674  | 1.00  | 63.48 |      | H0 |
| ANISOU 9881 HB THR D 21   | 8330    | 9270   | 6520   | -1190 | 2300  | 250  | H0 |
| ATOM 9882 HG21 THR D 21   | -11.983 | 18.853 | 3.861  | 1.00  | 60.14 |      | H0 |
| ANISOU 9882 HG21 THR D 21 | 7800    | 8660   | 6380   | -1140 | 2120  | 70   | H0 |
| ATOM 9883 HG22 THR D 21   | -11.614 | 17.570 | 2.998  | 1.00  | 61.15 |      | H0 |
| ANISOU 9883 HG22 THR D 21 | 7960    | 8930   | 6350   | -1020 | 2220  | -30  | H0 |
| ATOM 9884 HG23 THR D 21   | -13.123 | 17.837 | 3.421  | 1.00  | 59.47 |      | H0 |
| ANISOU 9884 HG23 THR D 21 | 7870    | 8560   | 6160   | -1040 | 2030  | -30  | H0 |
| ATOM 9885 N GLN D 22      | -13.253 | 22.284 | 1.038  | 1.00  | 68.09 |      | N0 |
| ANISOU 9885 N GLN D 22    | 9140    | 9640   | 7100   | -1370 | 2190  | 620  | N0 |
| ATOM 9886 CA GLN D 22     | -13.077 | 23.345 | 0.007  | 1.00  | 72.14 |      | C0 |
| ANISOU 9886 CA GLN D 22   | 9720    | 10190  | 7510   | -1440 | 2280  | 840  | C0 |
| ATOM 9887 C GLN D 22      | -11.608 | 23.336 | -0.416 | 1.00  | 74.27 |      | C0 |
| ANISOU 9887 C GLN D 22    | 9860    | 10610  | 7750   | -1520 | 2480  | 880  | C0 |
| ATOM 9888 O GLN D 22      | -10.751 | 23.540 | 0.465  | 1.00  | 73.81 |      | O0 |
| ANISOU 9888 O GLN D 22    | 9650    | 10510  | 7880   | -1600 | 2520  | 850  | O0 |
| ATOM 9889 CB GLN D 22     | -13.499 | 24.713 | 0.555  | 1.00  | 73.61 |      | C0 |
| ANISOU 9889 CB GLN D 22   | 9950    | 10160  | 7860   | -1540 | 2220  | 980  | C0 |
| ATOM 9890 CG GLN D 22     | -15.002 | 24.963 | 0.476  | 1.00  | 74.28 |      | C0 |
| ANISOU 9890 CG GLN D 22   | 10180   | 10150  | 7890   | -1450 | 2060  | 1020 | C0 |
| ATOM 9891 CD GLN D 22     | -15.609 | 25.454 | 1.771  | 1.00  | 73.98 |      | C0 |
| ANISOU 9891 CD GLN D 22   | 10140   | 9900   | 8070   | -1450 | 1930  | 980  | C0 |
| ATOM 9892 OE1 GLN D 22    | -15.060 | 26.313 | 2.459  | 1.00  | 75.06 |      | O0 |
| ANISOU 9892 OE1 GLN D 22  | 10230   | 9890   | 8390   | -1560 | 1970  | 1020 | O0 |
| ATOM 9893 NE2 GLN D 22    | -16.767 | 24.910 | 2.114  | 1.00  | 73.03 |      | N0 |
| ANISOU 9893 NE2 GLN D 22  | 10060   | 9760   | 7930   | -1340 | 1780  | 880  | N0 |
| ATOM 9894 H GLN D 22      | -13.030 | 22.564 | 1.876  | 1.00  | 67.30 |      | H0 |
| ANISOU 9894 H GLN D 22    | 8970    | 9450   | 7150   | -1410 | 2160  | 610  | H0 |
| ATOM 9895 HA GLN D 22     | -13.637 | 23.124 | -0.773 | 1.00  | 72.61 |      | H0 |
| ANISOU 9895 HA GLN D 22   | 9870    | 10320  | 7400   | -1380 | 2270  | 860  | H0 |
| ATOM 9896 HB2 GLN D 22    | -13.208 | 24.779 | 1.488  | 1.00  | 72.70 |      | H0 |
| ANISOU 9896 HB2 GLN D 22  | 9760    | 9960   | 7900   | -1580 | 2190  | 910  | H0 |
| ATOM 9897 HB3 GLN D 22    | -13.033 | 25.410 | 0.046  | 1.00  | 75.17 |      | H0 |
| ANISOU 9897 HB3 GLN D 22  | 10160   | 10370  | 8030   | -1610 | 2320  | 1120 | H0 |
| ATOM 9898 HG2 GLN D 22    | -15.175 | 25.626 | -0.224 | 1.00  | 75.62 |      | H0 |
| ANISOU 9898 HG2 GLN D 22  | 10430   | 10320  | 7980   | -1460 | 2090  | 1180 | H0 |
| ATOM 9899 HG3 GLN D 22    | -15.450 | 24.131 | 0.212  | 1.00  | 73.67 |      | H0 |
| ANISOU 9899 HG3 GLN D 22  | 10120   | 10170  | 7700   | -1360 | 2010  | 930  | H0 |
| ATOM 9900 HE21 GLN D 22   | -17.023 | 24.913 | 2.961  | 1.00  | 71.71 |      | H0 |
| ANISOU 9900 HE21 GLN D 22 | 9860    | 9510   | 7880   | -1330 | 1720  | 820  | H0 |
| ATOM 9901 HE22 GLN D 22   | -17.286 | 24.546 | 1.498  | 1.00  | 73.03 |      | H0 |
| ANISOU 9901 HE22 GLN D 22 | 10110   | 9850   | 7790   | -1280 | 1750  | 890  | H0 |
| ATOM 9902 N ARG D 23      | -11.332 | 23.093 | -1.703 | 1.00  | 76.78 |      | N0 |
| ANISOU 9902 N ARG D 23    | 10220   | 11110  | 7840   | -1480 | 2610  | 940  | N0 |
| ATOM 9903 CA ARG D 23     | -9.975  | 22.741 | -2.203 | 1.00  | 78.54 |      | C0 |
| ANISOU 9903 CA ARG D 23   | 10310   | 11540  | 7990   | -1500 | 2810  | 940  | C0 |
| ATOM 9904 C ARG D 23      | -9.512  | 21.508 | -1.411 | 1.00  | 76.60 |      | C0 |
| ANISOU 9904 C ARG D 23    | 9940    | 11330  | 7830   | -1400 | 2790  | 710  | C0 |
| ATOM 9905 O ARG D 23      | -10.376 | 20.640 | -1.143 | 1.00  | 74.63 |      | O0 |
| ANISOU 9905 O ARG D 23    | 9780    | 11020  | 7550   | -1290 | 2660  | 550  | O0 |
| ATOM 9906 CB ARG D 23     | -9.054  | 23.966 | -2.111 | 1.00  | 81.09 |      | C0 |
| ANISOU 9906 CB ARG D 23   | 10530   | 11830  | 8440   | -1690 | 2930  | 1130 | C0 |
| ATOM 9907 CG ARG D 23     | -9.120  | 24.876 | -3.330 | 1.00  | 84.44 |      | C0 |

|                           |         |        |        |       |       |      |    |
|---------------------------|---------|--------|--------|-------|-------|------|----|
| ANISOU 9907 CG ARG D 23   | 11070   | 12310  | 8700   | -1760 | 3030  | 1370 | C0 |
| ATOM 9908 CD ARG D 23     | -8.261  | 24.351 | -4.466 | 1.00  | 87.28 |      | C0 |
| ANISOU 9908 CD ARG D 23   | 11370   | 12960  | 8830   | -1720 | 3230  | 1390 | C0 |
| ATOM 9909 NE ARG D 23     | -8.745  | 24.761 | -5.778 | 1.00  | 90.00 |      | N0 |
| ANISOU 9909 NE ARG D 23   | 11880   | 13400  | 8920   | -1710 | 3290  | 1570 | N0 |
| ATOM 9910 CZ ARG D 23     | -8.599  | 25.975 | -6.308 | 1.00  | 92.11 |      | C0 |
| ANISOU 9910 CZ ARG D 23   | 12200   | 13630  | 9170   | -1840 | 3370  | 1830 | C0 |
| ATOM 9911 NH1 ARG D 23    | -9.085  | 26.226 | -7.513 | 1.00  | 93.64 |      | N0 |
| ANISOU 9911 NH1 ARG D 23  | 12550   | 13930  | 9100   | -1800 | 3410  | 1990 | N0 |
| ATOM 9912 NH2 ARG D 23    | -7.980  | 26.934 | -5.637 | 1.00  | 92.49 |      | N0 |
| ANISOU 9912 NH2 ARG D 23  | 12160   | 13530  | 9460   | -2020 | 3410  | 1950 | N0 |
| ATOM 9913 H ARG D 23      | -11.966 | 23.130 | -2.356 | 1.00  | 77.06 |      | H0 |
| ANISOU 9913 H ARG D 23    | 10370   | 11180  | 7730   | -1440 | 2570  | 990  | H0 |
| ATOM 9914 HA ARG D 23     | -10.058 | 22.486 | -3.151 | 1.00  | 79.79 |      | H0 |
| ANISOU 9914 HA ARG D 23   | 10540   | 11820  | 7950   | -1450 | 2870  | 960  | H0 |
| ATOM 9915 HB2 ARG D 23    | -9.296  | 24.486 | -1.318 | 1.00  | 80.08 |      | H0 |
| ANISOU 9915 HB2 ARG D 23  | 10400   | 11540  | 8480   | -1750 | 2840  | 1140 | H0 |
| ATOM 9916 HB3 ARG D 23    | -8.132  | 23.663 | -2.000 | 1.00  | 81.68 |      | H0 |
| ANISOU 9916 HB3 ARG D 23  | 10470   | 12020  | 8550   | -1710 | 3030  | 1090 | H0 |
| ATOM 9917 HG2 ARG D 23    | -10.049 | 24.946 | -3.635 | 1.00  | 83.94 |      | H0 |
| ANISOU 9917 HG2 ARG D 23  | 11150   | 12200  | 8550   | -1700 | 2940  | 1400 | H0 |
| ATOM 9918 HG3 ARG D 23    | -8.812  | 25.774 | -3.082 | 1.00  | 85.06 |      | H0 |
| ANISOU 9918 HG3 ARG D 23  | 11120   | 12290  | 8900   | -1890 | 3060  | 1490 | H0 |
| ATOM 9919 HD2 ARG D 23    | -7.341  | 24.668 | -4.348 | 1.00  | 88.42 |      | H0 |
| ANISOU 9919 HD2 ARG D 23  | 11390   | 13160  | 9050   | -1820 | 3350  | 1450 | H0 |
| ATOM 9920 HD3 ARG D 23    | -8.244  | 23.370 | -4.427 | 1.00  | 86.58 |      | H0 |
| ANISOU 9920 HD3 ARG D 23  | 11260   | 12950  | 8680   | -1610 | 3220  | 1220 | H0 |
| ATOM 9921 HE ARG D 23     | -9.159  | 24.163 | -6.259 | 1.00  | 89.76 |      | H0 |
| ANISOU 9921 HE ARG D 23   | 11920   | 13460  | 8720   | -1600 | 3260  | 1490 | H0 |
| ATOM 9922 HH11 ARG D 23   | -9.497  | 25.592 | -7.961 | 1.00  | 93.55 |      | H0 |
| ANISOU 9922 HH11 ARG D 23 | 12600   | 14030  | 8920   | -1690 | 3370  | 1900 | H0 |
| ATOM 9923 HH12 ARG D 23   | -8.993  | 27.027 | -7.865 | 1.00  | 95.19 |      | H0 |
| ANISOU 9923 HH12 ARG D 23 | 12780   | 14100  | 9280   | -1880 | 3460  | 2180 | H0 |
| ATOM 9924 HH21 ARG D 23   | -7.656  | 26.777 | -4.835 | 1.00  | 91.39 |      | H0 |
| ANISOU 9924 HH21 ARG D 23 | 11910   | 13330  | 9480   | -2060 | 3380  | 1840 | H0 |
| ATOM 9925 HH22 ARG D 23   | -7.894  | 27.731 | -5.993 | 1.00  | 93.98 |      | H0 |
| ANISOU 9925 HH22 ARG D 23 | 12390   | 13680  | 9640   | -2120 | 3470  | 2130 | H0 |
| ATOM 9926 N ASP D 24      | -8.228  | 21.418 | -1.043 | 1.00  | 76.61 |      | N0 |
| ANISOU 9926 N ASP D 24    | 9750    | 11430  | 7930   | -1450 | 2920  | 690  | N0 |
| ATOM 9927 CA ASP D 24     | -7.704  | 20.351 | -0.144 | 1.00  | 75.44 |      | C0 |
| ANISOU 9927 CA ASP D 24   | 9460    | 11310  | 7900   | -1340 | 2900  | 500  | C0 |
| ATOM 9928 C ASP D 24      | -7.494  | 20.937 | 1.261  | 1.00  | 72.53 |      | C0 |
| ANISOU 9928 C ASP D 24    | 8970    | 10800  | 7800   | -1450 | 2800  | 500  | C0 |
| ATOM 9929 O ASP D 24      | -6.444  | 20.652 | 1.866  | 1.00  | 73.47 |      | O0 |
| ANISOU 9929 O ASP D 24    | 8880    | 11010  | 8020   | -1460 | 2860  | 450  | O0 |
| ATOM 9930 CB ASP D 24     | -6.434  | 19.711 | -0.720 | 1.00  | 78.12 |      | C0 |
| ANISOU 9930 CB ASP D 24   | 9650    | 11890  | 8140   | -1270 | 3110  | 470  | C0 |
| ATOM 9931 CG ASP D 24     | -6.693  | 18.587 | -1.716 | 1.00  | 79.34 |      | C0 |
| ANISOU 9931 CG ASP D 24   | 9930    | 12160  | 8060   | -1090 | 3170  | 350  | C0 |
| ATOM 9932 OD1 ASP D 24    | -7.634  | 17.792 | -1.480 | 1.00  | 77.81 |      | O0 |
| ANISOU 9932 OD1 ASP D 24  | 9870    | 11850  | 7840   | -990  | 3030  | 200  | O0 |
| ATOM 9933 OD2 ASP D 24    | -5.942  | 18.505 | -2.714 | 1.00  | 80.84 |      | O0 |
| ANISOU 9933 OD2 ASP D 24  | 10070   | 12560  | 8080   | -1070 | 3360  | 400  | O0 |
| ATOM 9934 H ASP D 24      | -7.587  | 21.990 | -1.335 | 1.00  | 78.23 |      | H0 |

|                           |         |        |        |       |       |      |    |
|---------------------------|---------|--------|--------|-------|-------|------|----|
| ANISOU 9934 H ASP D 24    | 9880    | 11700  | 8140   | -1540 | 3030  | 800  | H0 |
| ATOM 9935 HA ASP D 24     | -8.391  | 19.648 | -0.077 | 1.00  | 74.13 |      | H0 |
| ANISOU 9935 HA ASP D 24   | 9390    | 11090  | 7690   | -1240 | 2810  | 390  | H0 |
| ATOM 9936 HB2 ASP D 24    | -5.905  | 20.401 | -1.169 | 1.00  | 79.63 |      | H0 |
| ANISOU 9936 HB2 ASP D 24  | 9780    | 12160  | 8310   | -1380 | 3210  | 600  | H0 |
| ATOM 9937 HB3 ASP D 24    | -5.897  | 19.343 | 0.010  | 1.00  | 77.64 |      | H0 |
| ANISOU 9937 HB3 ASP D 24  | 9450    | 11850  | 8200   | -1240 | 3100  | 400  | H0 |
| ATOM 9938 N ARG D 25      | -8.456  | 21.721 | 1.760  | 1.00  | 68.76 |      | N0 |
| ANISOU 9938 N ARG D 25    | 8600    | 10110  | 7410   | -1530 | 2660  | 550  | N0 |
| ATOM 9939 CA ARG D 25     | -8.435  | 22.279 | 3.139  | 1.00  | 66.45 |      | C0 |
| ANISOU 9939 CA ARG D 25   | 8230    | 9670   | 7350   | -1620 | 2540  | 530  | C0 |
| ATOM 9940 C ARG D 25      | -9.394  | 21.476 | 4.009  | 1.00  | 61.91 |      | C0 |
| ANISOU 9940 C ARG D 25    | 7720    | 8980   | 6830   | -1500 | 2370  | 370  | C0 |
| ATOM 9941 O ARG D 25      | -10.438 | 21.019 | 3.543  | 1.00  | 59.36 |      | O0 |
| ANISOU 9941 O ARG D 25    | 7550    | 8620   | 6390   | -1400 | 2300  | 340  | O0 |
| ATOM 9942 CB ARG D 25     | -8.821  | 23.761 | 3.171  | 1.00  | 67.61 |      | C0 |
| ANISOU 9942 CB ARG D 25   | 8460    | 9640   | 7580   | -1790 | 2510  | 690  | C0 |
| ATOM 9943 CG ARG D 25     | -7.829  | 24.674 | 2.465  | 1.00  | 71.54 |      | C0 |
| ANISOU 9943 CG ARG D 25   | 8890    | 10220  | 8070   | -1960 | 2680  | 860  | C0 |
| ATOM 9944 CD ARG D 25     | -7.960  | 26.128 | 2.880  | 1.00  | 73.02 |      | C0 |
| ANISOU 9944 CD ARG D 25   | 9130    | 10190  | 8420   | -2150 | 2640  | 980  | C0 |
| ATOM 9945 NE ARG D 25     | -7.639  | 27.018 | 1.768  | 1.00  | 76.45 |      | N0 |
| ANISOU 9945 NE ARG D 25   | 9630    | 10650  | 8770   | -2270 | 2790  | 1200 | N0 |
| ATOM 9946 CZ ARG D 25     | -8.506  | 27.456 | 0.855  | 1.00  | 77.12 |      | C0 |
| ANISOU 9946 CZ ARG D 25   | 9920    | 10670  | 8720   | -2220 | 2780  | 1340 | C0 |
| ATOM 9947 NH1 ARG D 25    | -8.091  | 28.257 | -0.112 | 1.00  | 79.55 |      | N0 |
| ANISOU 9947 NH1 ARG D 25  | 10270   | 11010  | 8950   | -2340 | 2930  | 1560 | N0 |
| ATOM 9948 NH2 ARG D 25    | -9.783  | 27.108 | 0.912  | 1.00  | 75.79 |      | N0 |
| ANISOU 9948 NH2 ARG D 25  | 9900    | 10410  | 8490   | -2060 | 2640  | 1280 | N0 |
| ATOM 9949 H ARG D 25      | -9.195  | 21.956 | 1.284  | 1.00  | 69.00 |      | H0 |
| ANISOU 9949 H ARG D 25    | 8770    | 10090  | 7360   | -1520 | 2620  | 600  | H0 |
| ATOM 9950 HA ARG D 25     | -7.524  | 22.182 | 3.497  | 1.00  | 66.94 |      | H0 |
| ANISOU 9950 HA ARG D 25   | 8130    | 9810   | 7490   | -1660 | 2600  | 510  | H0 |
| ATOM 9951 HB2 ARG D 25    | -9.700  | 23.865 | 2.753  | 1.00  | 67.39 |      | H0 |
| ANISOU 9951 HB2 ARG D 25  | 8580    | 9550   | 7480   | -1740 | 2460  | 720  | H0 |
| ATOM 9952 HB3 ARG D 25    | -8.898  | 24.043 | 4.106  | 1.00  | 66.88 |      | H0 |
| ANISOU 9952 HB3 ARG D 25  | 8330    | 9440   | 7630   | -1840 | 2420  | 640  | H0 |
| ATOM 9953 HG2 ARG D 25    | -6.918  | 24.370 | 2.661  | 1.00  | 72.04 |      | H0 |
| ANISOU 9953 HG2 ARG D 25  | 8790    | 10410  | 8170   | -1980 | 2750  | 820  | H0 |
| ATOM 9954 HG3 ARG D 25    | -7.965  | 24.607 | 1.496  | 1.00  | 72.35 |      | H0 |
| ANISOU 9954 HG3 ARG D 25  | 9070    | 10400  | 8020   | -1920 | 2750  | 930  | H0 |
| ATOM 9955 HD2 ARG D 25    | -8.874  | 26.301 | 3.190  | 1.00  | 71.83 |      | H0 |
| ANISOU 9955 HD2 ARG D 25  | 9100    | 9900   | 8290   | -2100 | 2530  | 970  | H0 |
| ATOM 9956 HD3 ARG D 25    | -7.349  | 26.308 | 3.626  | 1.00  | 73.12 |      | H0 |
| ANISOU 9956 HD3 ARG D 25  | 9020    | 10200  | 8560   | -2240 | 2640  | 940  | H0 |
| ATOM 9957 HE ARG D 25     | -6.809  | 27.273 | 1.687  | 1.00  | 77.65 |      | H0 |
| ANISOU 9957 HE ARG D 25   | 9670    | 10880  | 8950   | -2380 | 2880  | 1250 | H0 |
| ATOM 9958 HH11 ARG D 25   | -7.246  | 28.493 | -0.154 | 1.00  | 80.90 |      | H0 |
| ANISOU 9958 HH11 ARG D 25 | 10330   | 11250  | 9160   | -2450 | 3030  | 1600 | H0 |
| ATOM 9959 HH12 ARG D 25   | -8.661  | 28.552 | -0.713 | 1.00  | 80.07 |      | H0 |
| ANISOU 9959 HH12 ARG D 25 | 10470   | 11040  | 8920   | -2300 | 2920  | 1660 | H0 |
| ATOM 9960 HH21 ARG D 25   | -10.072 | 26.575 | 1.548  | 1.00  | 73.99 |      | H0 |
| ANISOU 9960 HH21 ARG D 25 | 9640    | 10160  | 8310   | -1990 | 2550  | 1150 | H0 |
| ATOM 9961 HH22 ARG D 25   | -10.345 | 27.408 | 0.303  | 1.00  | 76.11 |      | H0 |

|             |               |         |        |       |       |       |      |    |
|-------------|---------------|---------|--------|-------|-------|-------|------|----|
| ANISOU 9961 | HH22 ARG D 25 | 10060   | 10430  | 8430  | -2030 | 2630  | 1380 | H0 |
| ATOM 9962   | N PROD 26     | -9.075  | 21.298 | 5.308 | 1.00  | 59.63 |      | N0 |
| ANISOU 9962 | N PROD 26     | 7300    | 8650   | 6710  | -1510 | 2300  | 280  | N0 |
| ATOM 9963   | CA PROD 26    | -9.988  | 20.622 | 6.222 | 1.00  | 56.78 |      | C0 |
| ANISOU 9963 | CA PROD 26    | 7000    | 8170   | 6400  | -1400 | 2140  | 160  | C0 |
| ATOM 9964   | C PROD 26     | -11.278 | 21.439 | 6.354 | 1.00  | 55.09 |      | C0 |
| ANISOU 9964 | C PROD 26     | 6950    | 7780   | 6210  | -1440 | 2020  | 210  | C0 |
| ATOM 9965   | O PROD 26     | -11.263 | 22.619 | 6.054 | 1.00  | 55.95 |      | O0 |
| ANISOU 9965 | O PROD 26     | 7100    | 7820   | 6340  | -1560 | 2040  | 340  | O0 |
| ATOM 9966   | CB PROD 26    | -9.216  | 20.536 | 7.547 | 1.00  | 56.59 |      | C0 |
| ANISOU 9966 | CB PROD 26    | 6790    | 8170   | 6540  | -1440 | 2100  | 90   | C0 |
| ATOM 9967   | CG PROD 26    | -8.147  | 21.608 | 7.446 | 1.00  | 58.59 |      | C0 |
| ANISOU 9967 | CG PROD 26    | 6920    | 8480   | 6870  | -1620 | 2200  | 190  | C0 |
| ATOM 9968   | CD PROD 26    | -7.847  | 21.758 | 5.970 | 1.00  | 60.52 |      | C0 |
| ANISOU 9968 | CD PROD 26    | 7210    | 8830   | 6960  | -1630 | 2350  | 300  | C0 |
| ATOM 9969   | HA PROD 26    | -10.185 | 19.711 | 5.887 | 1.00  | 56.54 |      | H0 |
| ANISOU 9969 | HA PROD 26    | 7010    | 8190   | 6280  | -1290 | 2150  | 90   | H0 |
| ATOM 9970   | HB2 PROD 26   | -9.809  | 20.709 | 8.310 | 1.00  | 55.39 |      | H0 |
| ANISOU 9970 | HB2 PROD 26   | 6680    | 7900   | 6460  | -1440 | 1990  | 50   | H0 |
| ATOM 9971   | HB3 PROD 26   | -8.810  | 19.652 | 7.660 | 1.00  | 56.53 |      | H0 |
| ANISOU 9971 | HB3 PROD 26   | 6720    | 8250   | 6520  | -1340 | 2130  | 20   | H0 |
| ATOM 9972   | HG2 PROD 26   | -8.471  | 22.454 | 7.817 | 1.00  | 58.42 |      | H0 |
| ANISOU 9972 | HG2 PROD 26   | 6940    | 8340   | 6920  | -1720 | 2140  | 230  | H0 |
| ATOM 9973   | HG3 PROD 26   | -7.342  | 21.340 | 7.934 | 1.00  | 58.99 |      | H0 |
| ANISOU 9973 | HG3 PROD 26   | 6810    | 8630   | 6970  | -1620 | 2220  | 150  | H0 |
| ATOM 9974   | HD2 PROD 26   | -7.657  | 22.688 | 5.747 | 1.00  | 61.52 |      | H0 |
| ANISOU 9974 | HD2 PROD 26   | 7340    | 8920   | 7120  | -1760 | 2390  | 400  | H0 |
| ATOM 9975   | HD3 PROD 26   | -7.085  | 21.208 | 5.710 | 1.00  | 61.36 |      | H0 |
| ANISOU 9975 | HD3 PROD 26   | 7210    | 9080   | 7020  | -1580 | 2450  | 280  | H0 |
| ATOM 9976   | N VAL D 27    | -12.363 | 20.778 | 6.758 | 1.00  | 53.12 |      | N0 |
| ANISOU 9976 | N VAL D 27    | 6790    | 7450   | 5940  | -1340 | 1890  | 120  | N0 |
| ATOM 9977   | CA VAL D 27   | -13.616 | 21.430 | 7.239 | 1.00  | 51.65 |      | C0 |
| ANISOU 9977 | CA VAL D 27   | 6710    | 7110   | 5810  | -1350 | 1750  | 150  | C0 |
| ATOM 9978   | C VAL D 27    | -13.344 | 21.948 | 8.658 | 1.00  | 50.17 |      | C0 |
| ANISOU 9978 | C VAL D 27    | 6430    | 6830   | 5810  | -1420 | 1690  | 100  | C0 |
| ATOM 9979   | O VAL D 27    | -12.975 | 21.131 | 9.521 | 1.00  | 47.74 |      | O0 |
| ANISOU 9979 | O VAL D 27    | 6020    | 6570   | 5550  | -1370 | 1660  | 0    | O0 |
| ATOM 9980   | CB VAL D 27   | -14.805 | 20.452 | 7.201 | 1.00  | 50.41 |      | C0 |
| ANISOU 9980 | CB VAL D 27   | 6650    | 6940   | 5570  | -1230 | 1650  | 60   | C0 |
| ATOM 9981   | CG1 VAL D 27  | -16.059 | 21.061 | 7.804 | 1.00  | 49.55 |      | C0 |
| ANISOU 9981 | CG1 VAL D 27  | 6610    | 6690   | 5520  | -1230 | 1520  | 90   | C0 |
| ATOM 9982   | CG2 VAL D 27  | -15.067 | 19.956 | 5.786 | 1.00  | 51.63 |      | C0 |
| ANISOU 9982 | CG2 VAL D 27  | 6900    | 7190   | 5520  | -1180 | 1700  | 90   | C0 |
| ATOM 9983   | H VAL D 27    | -12.400 | 19.868 | 6.772 | 1.00  | 52.67 |      | H0 |
| ANISOU 9983 | H VAL D 27    | 6720    | 7440   | 5840  | -1250 | 1880  | 40   | H0 |
| ATOM 9984   | HA VAL D 27   | -13.814 | 22.186 | 6.660 | 1.00  | 52.41 |      | H0 |
| ANISOU 9984 | HA VAL D 27   | 6870    | 7170   | 5870  | -1400 | 1780  | 250  | H0 |
| ATOM 9985   | HB VAL D 27   | -14.558 | 19.668 | 7.752 | 1.00  | 49.83 |      | H0 |
| ANISOU 9985 | HB VAL D 27   | 6510    | 6890   | 5530  | -1180 | 1640  | -30  | H0 |
| ATOM 9986   | HG11 VAL D 27 | -15.992 | 21.052 | 8.774 | 1.00  | 48.71 |      | H0 |
| ANISOU 9986 | HG11 VAL D 27 | 6450    | 6540   | 5520  | -1230 | 1470  | 30   | H0 |
| ATOM 9987   | HG12 VAL D 27 | -16.837 | 20.544 | 7.529 | 1.00  | 49.06 |      | H0 |
| ANISOU 9987 | HG12 VAL D 27 | 6610    | 6650   | 5380  | -1170 | 1460  | 60   | H0 |
| ATOM 9988   | HG13 VAL D 27 | -16.156 | 21.979 | 7.495 | 1.00  | 50.21 |      | H0 |

|                           |         |        |        |       |       |      |    |
|---------------------------|---------|--------|--------|-------|-------|------|----|
| ANISOU 9988 HG13 VAL D 27 | 6740    | 6730   | 5610   | -1270 | 1530  | 180  | H0 |
| ATOM 9989 HG21 VAL D 27   | -15.215 | 20.717 | 5.197  | 1.00  | 52.38 |      | H0 |
| ANISOU 9989 HG21 VAL D 27 | 7050    | 7280   | 5570   | -1220 | 1730  | 190  | H0 |
| ATOM 9990 HG22 VAL D 27   | -15.855 | 19.386 | 5.782  | 1.00  | 50.87 |      | H0 |
| ANISOU 9990 HG22 VAL D 27 | 6860    | 7090   | 5380   | -1120 | 1630  | 30   | H0 |
| ATOM 9991 HG23 VAL D 27   | -14.300 | 19.448 | 5.471  | 1.00  | 52.20 |      | H0 |
| ANISOU 9991 HG23 VAL D 27 | 6920    | 7350   | 5550   | -1160 | 1790  | 50   | H0 |
| ATOM 9992 N ALA D 28      | -13.472 | 23.261 | 8.867  | 1.00  | 50.87 |      | N0 |
| ANISOU 9992 N ALA D 28    | 6560    | 6790   | 5980   | -1520 | 1680  | 190  | N0 |
| ATOM 9993 CA ALA D 28     | -13.233 | 23.938 | 10.163 | 1.00  | 50.71 |      | C0 |
| ANISOU 9993 CA ALA D 28   | 6470    | 6670   | 6130   | -1610 | 1620  | 130  | C0 |
| ATOM 9994 C ALA D 28      | -14.508 | 23.835 | 11.000 | 1.00  | 49.29 |      | C0 |
| ANISOU 9994 C ALA D 28    | 6370    | 6380   | 5980   | -1520 | 1480  | 70   | C0 |
| ATOM 9995 O ALA D 28      | -15.456 | 24.598 | 10.730 | 1.00  | 50.27 |      | O0 |
| ANISOU 9995 O ALA D 28    | 6630    | 6380   | 6100   | -1500 | 1440  | 140  | O0 |
| ATOM 9996 CB ALA D 28     | -12.815 | 25.376 | 9.949  | 1.00  | 52.14 |      | C0 |
| ANISOU 9996 CB ALA D 28   | 6690    | 6730   | 6390   | -1770 | 1670  | 240  | C0 |
| ATOM 9997 H ALA D 28      | -13.724 | 23.845 | 8.215  | 1.00  | 51.62 |      | H0 |
| ANISOU 9997 H ALA D 28    | 6730    | 6840   | 6040   | -1550 | 1700  | 280  | H0 |
| ATOM 9998 HA ALA D 28     | -12.510 | 23.465 | 10.635 | 1.00  | 50.60 |      | H0 |
| ANISOU 9998 HA ALA D 28   | 6340    | 6740   | 6150   | -1620 | 1630  | 70   | H0 |
| ATOM 9999 HB1 ALA D 28    | -12.704 | 25.814 | 10.810 | 1.00  | 52.15 |      | H0 |
| ANISOU 9999 HB1 ALA D 28  | 6660    | 6660   | 6490   | -1830 | 1630  | 190  | H0 |
| ATOM 10000 HB2 ALA D 28   | -11.973 | 25.401 | 9.464  | 1.00  | 53.32 |      | H0 |
| ANISOU10000 HB2 ALA D 28  | 6770    | 6970   | 6520   | -1840 | 1770  | 290  | H0 |
| ATOM 10001 HB3 ALA D 28   | -13.497 | 25.841 | 9.436  | 1.00  | 52.46 |      | H0 |
| ANISOU10001 HB3 ALA D 28  | 6850    | 6690   | 6390   | -1750 | 1670  | 320  | H0 |
| ATOM 10002 N VAL D 29     | -14.533 | 22.896 | 11.947 | 1.00  | 47.57 |      | N0 |
| ANISOU10002 N VAL D 29    | 6070    | 6220   | 5780   | -1450 | 1410  | -50  | N0 |
| ATOM 10003 CA VAL D 29    | -15.693 | 22.648 | 12.844 | 1.00  | 46.58 |      | C0 |
| ANISOU10003 CA VAL D 29   | 5990    | 6020   | 5680   | -1360 | 1290  | -120 | C0 |
| ATOM 10004 C VAL D 29     | -15.437 | 23.378 | 14.166 | 1.00  | 47.23 |      | C0 |
| ANISOU10004 C VAL D 29    | 6020    | 6030   | 5890   | -1430 | 1240  | -180 | C0 |
| ATOM 10005 O VAL D 29     | -14.399 | 23.110 | 14.800 | 1.00  | 46.78 |      | O0 |
| ANISOU10005 O VAL D 29    | 5830    | 6060   | 5880   | -1480 | 1250  | -240 | O0 |
| ATOM 10006 CB VAL D 29    | -15.924 | 21.139 | 13.040 | 1.00  | 45.16 |      | C0 |
| ANISOU10006 CB VAL D 29   | 5780    | 5940   | 5440   | -1250 | 1260  | -200 | C0 |
| ATOM 10007 CG1 VAL D 29   | -17.042 | 20.859 | 14.031 | 1.00  | 44.00 |      | C0 |
| ANISOU10007 CG1 VAL D 29  | 5660    | 5740   | 5320   | -1180 | 1140  | -250 | C0 |
| ATOM 10008 CG2 VAL D 29   | -16.189 | 20.446 | 11.713 | 1.00  | 45.12 |      | C0 |
| ANISOU10008 CG2 VAL D 29  | 5840    | 6000   | 5300   | -1190 | 1310  | -160 | C0 |
| ATOM 10009 H VAL D 29     | -13.829 | 22.339 | 12.105 | 1.00  | 47.84 |      | H0 |
| ANISOU10009 H VAL D 29    | 6010    | 6350   | 5820   | -1440 | 1440  | -90  | H0 |
| ATOM 10010 HA VAL D 29    | -16.486 | 23.028 | 12.430 | 1.00  | 46.58 |      | H0 |
| ANISOU10010 HA VAL D 29   | 6090    | 5960   | 5650   | -1330 | 1270  | -70  | H0 |
| ATOM 10011 HB VAL D 29    | -15.091 | 20.760 | 13.414 | 1.00  | 45.32 |      | H0 |
| ANISOU10011 HB VAL D 29   | 5700    | 6030   | 5490   | -1260 | 1290  | -240 | H0 |
| ATOM 10012 HG11 VAL D 29  | -16.718 | 21.003 | 14.937 | 1.00  | 43.80 |      | H0 |
| ANISOU10012 HG11 VAL D 29 | 5570    | 5720   | 5360   | -1200 | 1120  | -300 | H0 |
| ATOM 10013 HG12 VAL D 29  | -17.338 | 19.937 | 13.938 | 1.00  | 43.41 |      | H0 |
| ANISOU10013 HG12 VAL D 29 | 5590    | 5710   | 5190   | -1110 | 1130  | -280 | H0 |
| ATOM 10014 HG13 VAL D 29  | -17.789 | 21.457 | 13.855 | 1.00  | 43.98 |      | H0 |
| ANISOU10014 HG13 VAL D 29 | 5730    | 5670   | 5310   | -1170 | 1110  | -220 | H0 |
| ATOM 10015 HG21 VAL D 29  | -16.945 | 20.870 | 11.270 | 1.00  | 45.28 |      | H0 |



|             |      |          |         |        |        |       |       |      |    |
|-------------|------|----------|---------|--------|--------|-------|-------|------|----|
| ANISOU10015 | HG21 | VAL D 29 | 5950    | 5970   | 5280   | -1180 | 1280  | -110 | H0 |
| ATOM 10016  | HG22 | VAL D 29 | -16.390 | 19.507 | 11.869 | 1.00  | 44.60 |      | H0 |
| ANISOU10016 | HG22 | VAL D 29 | 5770    | 5970   | 5210   | -1130 | 1280  | -220 | H0 |
| ATOM 10017  | HG23 | VAL D 29 | -15.401 | 20.517 | 11.146 | 1.00  | 46.10 |      | H0 |
| ANISOU10017 | HG23 | VAL D 29 | 5940    | 6180   | 5400   | -1230 | 1390  | -130 | H0 |
| ATOM 10018  | N    | SER D 30 | -16.336 | 24.292 | 14.540 | 1.00  | 48.23 |      | N0 |
| ANISOU10018 | N    | SER D 30 | 6250    | 6020   | 6060   | -1420 | 1180  | -170 | N0 |
| ATOM 10019  | CA   | SER D 30 | -16.373 | 24.947 | 15.873 | 1.00  | 49.61 |      | C0 |
| ANISOU10019 | CA   | SER D 30 | 6400    | 6110   | 6340   | -1460 | 1120  | -260 | C0 |
| ATOM 10020  | C    | SER D 30 | -17.112 | 24.025 | 16.845 | 1.00  | 49.18 |      | C0 |
| ANISOU10020 | C    | SER D 30 | 6310    | 6120   | 6250   | -1350 | 1030  | -350 | C0 |
| ATOM 10021  | O    | SER D 30 | -18.219 | 23.582 | 16.492 | 1.00  | 48.08 |      | O0 |
| ANISOU10021 | O    | SER D 30 | 6240    | 5980   | 6050   | -1240 | 1000  | -320 | O0 |
| ATOM 10022  | CB   | SER D 30 | -17.023 | 26.309 | 15.814 | 1.00  | 50.67 |      | C0 |
| ANISOU10022 | CB   | SER D 30 | 6680    | 6050   | 6530   | -1490 | 1110  | -220 | C0 |
| ATOM 10023  | OG   | SER D 30 | -16.047 | 27.335 | 15.760 | 1.00  | 53.29 |      | O0 |
| ANISOU10023 | OG   | SER D 30 | 7010    | 6290   | 6950   | -1650 | 1170  | -200 | O0 |
| ATOM 10024  | H    | SER D 30 | -17.008 | 24.577 | 13.995 | 1.00  | 48.39 |      | H0 |
| ANISOU10024 | H    | SER D 30 | 6360    | 5980   | 6050   | -1390 | 1180  | -110 | H0 |
| ATOM 10025  | HA   | SER D 30 | -15.438 | 25.056 | 16.190 | 1.00  | 50.17 |      | H0 |
| ANISOU10025 | HA   | SER D 30 | 6390    | 6220   | 6450   | -1550 | 1140  | -300 | H0 |
| ATOM 10026  | HB2  | SER D 30 | -17.595 | 26.364 | 15.020 | 1.00  | 50.89 |      | H0 |
| ANISOU10026 | HB2  | SER D 30 | 6780    | 6050   | 6510   | -1430 | 1130  | -130 | H0 |
| ATOM 10027  | HB3  | SER D 30 | -17.590 | 26.438 | 16.609 | 1.00  | 50.44 |      | H0 |
| ANISOU10027 | HB3  | SER D 30 | 6660    | 5980   | 6520   | -1440 | 1050  | -280 | H0 |
| ATOM 10028  | N    | VAL D 31 | -16.513 | 23.747 | 18.006 | 1.00  | 50.87 |      | N0 |
| ANISOU10028 | N    | VAL D 31 | 6420    | 6400   | 6510   | -1370 | 990   | -450 | N0 |
| ATOM 10029  | CA   | VAL D 31 | -17.134 | 22.959 | 19.112 | 1.00  | 51.62 |      | C0 |
| ANISOU10029 | CA   | VAL D 31 | 6480    | 6560   | 6580   | -1270 | 910   | -520 | C0 |
| ATOM 10030  | C    | VAL D 31 | -17.165 | 23.833 | 20.369 | 1.00  | 53.04 |      | C0 |
| ANISOU10030 | C    | VAL D 31 | 6650    | 6690   | 6810   | -1310 | 860   | -620 | C0 |
| ATOM 10031  | O    | VAL D 31 | -16.136 | 24.452 | 20.685 | 1.00  | 55.49 |      | O0 |
| ANISOU10031 | O    | VAL D 31 | 6910    | 7000   | 7180   | -1440 | 870   | -660 | O0 |
| ATOM 10032  | CB   | VAL D 31 | -16.390 | 21.634 | 19.364 | 1.00  | 52.01 |      | C0 |
| ANISOU10032 | CB   | VAL D 31 | 6400    | 6770   | 6590   | -1230 | 920   | -540 | C0 |
| ATOM 10033  | CG1  | VAL D 31 | -17.115 | 20.778 | 20.396 | 1.00  | 51.33 |      | C0 |
| ANISOU10033 | CG1  | VAL D 31 | 6300    | 6730   | 6470   | -1130 | 850   | -590 | C0 |
| ATOM 10034  | CG2  | VAL D 31 | -16.176 | 20.855 | 18.074 | 1.00  | 51.88 |      | C0 |
| ANISOU10034 | CG2  | VAL D 31 | 6400    | 6790   | 6520   | -1200 | 990   | -470 | C0 |
| ATOM 10035  | H    | VAL D 31 | -15.668 | 24.028 | 18.199 | 1.00  | 51.58 |      | H0 |
| ANISOU10035 | H    | VAL D 31 | 6450    | 6520   | 6630   | -1460 | 1020  | -470 | H0 |
| ATOM 10036  | HA   | VAL D 31 | -18.050 | 22.751 | 18.860 | 1.00  | 50.98 |      | H0 |
| ANISOU10036 | HA   | VAL D 31 | 6460    | 6450   | 6460   | -1200 | 900   | -490 | H0 |
| ATOM 10037  | HB   | VAL D 31 | -15.501 | 21.860 | 19.732 | 1.00  | 52.56 |      | H0 |
| ANISOU10037 | HB   | VAL D 31 | 6390    | 6880   | 6690   | -1300 | 930   | -570 | H0 |
| ATOM 10038  | HG11 | VAL D 31 | -17.018 | 21.178 | 21.278 | 1.00  | 51.45 |      | H0 |
| ANISOU10038 | HG11 | VAL D 31 | 6280    | 6760   | 6510   | -1150 | 810   | -640 | H0 |
| ATOM 10039  | HG12 | VAL D 31 | -16.733 | 19.884 | 20.404 | 1.00  | 50.99 |      | H0 |
| ANISOU10039 | HG12 | VAL D 31 | 6200    | 6770   | 6410   | -1090 | 860   | -580 | H0 |
| ATOM 10040  | HG13 | VAL D 31 | -18.060 | 20.724 | 20.168 | 1.00  | 50.71 |      | H0 |
| ANISOU10040 | HG13 | VAL D 31 | 6290    | 6610   | 6370   | -1080 | 830   | -560 | H0 |
| ATOM 10041  | HG21 | VAL D 31 | -17.023 | 20.765 | 17.604 | 1.00  | 51.46 |      | H0 |
| ANISOU10041 | HG21 | VAL D 31 | 6430    | 6690   | 6430   | -1150 | 980   | -440 | H0 |
| ATOM 10042  | HG22 | VAL D 31 | -15.826 | 19.971 | 18.282 | 1.00  | 51.63 |      | H0 |

|             |      |          |         |        |        |       |       |       |    |
|-------------|------|----------|---------|--------|--------|-------|-------|-------|----|
| ANISOU10042 | HG22 | VAL D 31 | 6310    | 6840   | 6470   | -1150 | 990   | -490  | H0 |
| ATOM 10043  | HG23 | VAL D 31 | -15.541 | 21.329 | 17.509 | 1.00  | 52.70 |       | H0 |
| ANISOU10043 | HG23 | VAL D 31 | 6490    | 6890   | 6640   | -1270 | 1040  | -440  | H0 |
| ATOM 10044  | N    | SER D 32 | -18.318 | 23.883 | 21.039 | 1.00  | 53.09 |       | N0 |
| ANISOU10044 | N    | SER D 32 | 6710    | 6660   | 6800   | -1220 | 810   | -650  | N0 |
| ATOM 10045  | CA   | SER D 32 | -18.546 | 24.588 | 22.327 | 1.00  | 54.45 |       | C0 |
| ANISOU10045 | CA   | SER D 32 | 6900    | 6790   | 7000   | -1230 | 750   | -760  | C0 |
| ATOM 10046  | C    | SER D 32 | -19.549 | 23.784 | 23.161 | 1.00  | 53.66 |       | C0 |
| ANISOU10046 | C    | SER D 32 | 6770    | 6780   | 6840   | -1100 | 700   | -780  | C0 |
| ATOM 10047  | O    | SER D 32 | -20.739 | 23.764 | 22.786 | 1.00  | 53.91 |       | O0 |
| ANISOU10047 | O    | SER D 32 | 6870    | 6770   | 6840   | -1000 | 700   | -730  | O0 |
| ATOM 10048  | CB   | SER D 32 | -19.037 | 25.995 | 22.082 | 1.00  | 56.06 |       | C0 |
| ANISOU10048 | CB   | SER D 32 | 7240    | 6800   | 7270   | -1250 | 770   | -760  | C0 |
| ATOM 10049  | OG   | SER D 32 | -19.418 | 26.629 | 23.297 | 1.00  | 56.52 |       | O0 |
| ANISOU10049 | OG   | SER D 32 | 7330    | 6810   | 7340   | -1230 | 730   | -880  | O0 |
| ATOM 10050  | H    | SER D 32 | -19.076 | 23.476 | 20.738 | 1.00  | 52.47 |       | H0 |
| ANISOU10050 | H    | SER D 32 | 6670    | 6580   | 6690   | -1140 | 800   | -610  | H0 |
| ATOM 10051  | HA   | SER D 32 | -17.684 | 24.630 | 22.819 | 1.00  | 54.95 |       | H0 |
| ANISOU10051 | HA   | SER D 32 | 6890    | 6910   | 7080   | -1300 | 740   | -810  | H0 |
| ATOM 10052  | HB2  | SER D 32 | -18.328 | 26.515 | 21.647 | 1.00  | 56.75 |       | H0 |
| ANISOU10052 | HB2  | SER D 32 | 7330    | 6830   | 7400   | -1350 | 810   | -750  | H0 |
| ATOM 10053  | HB3  | SER D 32 | -19.810 | 25.967 | 21.473 | 1.00  | 55.53 |       | H0 |
| ANISOU10053 | HB3  | SER D 32 | 7230    | 6690   | 7180   | -1180 | 780   | -690  | H0 |
| ATOM 10054  | N    | LEU D 33 | -19.093 | 23.128 | 24.232 | 1.00  | 53.23 |       | N0 |
| ANISOU10054 | N    | LEU D 33 | 6620    | 6860   | 6750   | -1090 | 660   | -850  | N0 |
| ATOM 10055  | CA   | LEU D 33 | -19.992 | 22.436 | 25.194 | 1.00  | 51.95 |       | C0 |
| ANISOU10055 | CA   | LEU D 33 | 6430    | 6790   | 6520   | -980  | 620   | -860  | C0 |
| ATOM 10056  | C    | LEU D 33 | -20.582 | 23.478 | 26.147 | 1.00  | 53.01 |       | C0 |
| ANISOU10056 | C    | LEU D 33 | 6620    | 6870   | 6650   | -960  | 590   | -960  | C0 |
| ATOM 10057  | O    | LEU D 33 | -19.798 | 24.245 | 26.754 | 1.00  | 55.01 |       | O0 |
| ANISOU10057 | O    | LEU D 33 | 6870    | 7100   | 6930   | -1050 | 570   | -1070 | O0 |
| ATOM 10058  | CB   | LEU D 33 | -19.230 | 21.357 | 25.966 | 1.00  | 51.74 |       | C0 |
| ANISOU10058 | CB   | LEU D 33 | 6290    | 6930   | 6440   | -970  | 590   | -870  | C0 |
| ATOM 10059  | CG   | LEU D 33 | -18.661 | 20.201 | 25.144 | 1.00  | 51.35 |       | C0 |
| ANISOU10059 | CG   | LEU D 33 | 6190    | 6930   | 6390   | -960  | 620   | -790  | C0 |
| ATOM 10060  | CD1  | LEU D 33 | -18.573 | 18.942 | 25.996 | 1.00  | 50.96 |       | C0 |
| ANISOU10060 | CD1  | LEU D 33 | 6060    | 7010   | 6290   | -880  | 590   | -760  | C0 |
| ATOM 10061  | CD2  | LEU D 33 | -19.479 | 19.933 | 23.886 | 1.00  | 50.98 |       | C0 |
| ANISOU10061 | CD2  | LEU D 33 | 6230    | 6790   | 6350   | -930  | 660   | -710  | C0 |
| ATOM 10062  | H    | LEU D 33 | -18.207 | 23.065 | 24.435 | 1.00  | 53.56 |       | H0 |
| ANISOU10062 | H    | LEU D 33 | 6600    | 6960   | 6800   | -1150 | 660   | -870  | H0 |
| ATOM 10063  | HA   | LEU D 33 | -20.725 | 22.022 | 24.690 | 1.00  | 51.45 |       | H0 |
| ANISOU10063 | HA   | LEU D 33 | 6400    | 6710   | 6440   | -920  | 630   | -800  | H0 |
| ATOM 10064  | HB2  | LEU D 33 | -18.491 | 21.788 | 26.440 | 1.00  | 52.51 |       | H0 |
| ANISOU10064 | HB2  | LEU D 33 | 6340    | 7050   | 6550   | -1030 | 570   | -940  | H0 |
| ATOM 10065  | HB3  | LEU D 33 | -19.833 | 20.987 | 26.642 | 1.00  | 51.48 |       | H0 |
| ANISOU10065 | HB3  | LEU D 33 | 6250    | 6950   | 6370   | -910  | 560   | -880  | H0 |
| ATOM 10066  | HG   | LEU D 33 | -17.746 | 20.445 | 24.863 | 1.00  | 51.87 |       | H0 |
| ANISOU10066 | HG   | LEU D 33 | 6220    | 7000   | 6490   | -1020 | 640   | -800  | H0 |
| ATOM 10067  | HD11 | LEU D 33 | -18.417 | 19.188 | 26.925 | 1.00  | 51.39 |       | H0 |
| ANISOU10067 | HD11 | LEU D 33 | 6080    | 7130   | 6320   | -890  | 550   | -810  | H0 |
| ATOM 10068  | HD12 | LEU D 33 | -17.839 | 18.388 | 25.683 | 1.00  | 51.00 |       | H0 |
| ANISOU10068 | HD12 | LEU D 33 | 6020    | 7060   | 6300   | -880  | 610   | -730  | H0 |
| ATOM 10069  | HD13 | LEU D 33 | -19.407 | 18.445 | 25.930 | 1.00  | 50.37 |       | H0 |

|             |       |          |          |         |        |        |      |       |    |
|-------------|-------|----------|----------|---------|--------|--------|------|-------|----|
| ANISOU10069 | HD13  | LEU D 33 | 6030     | 6920    | 6190   | -830   | 590  | -720  | H0 |
| ATOM        | 10070 | HD21     | LEU D 33 | -20.421 | 19.864 | 24.120 | 1.00 | 50.49 | H0 |
| ANISOU10070 | HD21  | LEU D 33 | 6200     | 6720    | 6260   | -880   | 640  | -700  | H0 |
| ATOM        | 10071 | HD22     | LEU D 33 | -19.187 | 19.101 | 23.480 | 1.00 | 50.54 | H0 |
| ANISOU10071 | HD22  | LEU D 33 | 6150     | 6770    | 6280   | -910   | 680  | -670  | H0 |
| ATOM        | 10072 | HD23     | LEU D 33 | -19.354 | 20.662 | 23.253 | 1.00 | 51.22 | H0 |
| ANISOU10072 | HD23  | LEU D 33 | 6300     | 6750    | 6410   | -980   | 680  | -700  | H0 |
| ATOM        | 10073 | N        | LYS D 34 | -21.911 | 23.517 | 26.240 | 1.00 | 51.60 | N0 |
| ANISOU10073 | N     | LYS D 34 | 6500     | 6660    | 6450   | -850   | 590  | -940  | N0 |
| ATOM        | 10074 | CA       | LYS D 34 | -22.672 | 24.355 | 27.203 | 1.00 | 51.99 | C0 |
| ANISOU10074 | CA    | LYS D 34 | 6600     | 6680    | 6480   | -790   | 580  | -1040 | C0 |
| ATOM        | 10075 | C        | LYS D 34 | -23.361 | 23.418 | 28.199 | 1.00 | 49.08 | C0 |
| ANISOU10075 | C     | LYS D 34 | 6150     | 6480    | 6010   | -700   | 550  | -1030 | C0 |
| ATOM        | 10076 | O        | LYS D 34 | -24.317 | 22.731 | 27.796 | 1.00 | 47.15 | O0 |
| ANISOU10076 | O     | LYS D 34 | 5890     | 6280    | 5740   | -620   | 560  | -940  | O0 |
| ATOM        | 10077 | CB       | LYS D 34 | -23.676 | 25.235 | 26.449 | 1.00 | 53.89 | C0 |
| ANISOU10077 | CB    | LYS D 34 | 6940     | 6770    | 6760   | -710   | 610  | -990  | C0 |
| ATOM        | 10078 | CG       | LYS D 34 | -24.142 | 26.468 | 27.206 | 1.00 | 57.15 | C0 |
| ANISOU10078 | CG    | LYS D 34 | 7440     | 7080    | 7190   | -660   | 620  | -1110 | C0 |
| ATOM        | 10079 | CD       | LYS D 34 | -23.105 | 27.577 | 27.243 | 1.00 | 60.37 | C0 |
| ANISOU10079 | CD    | LYS D 34 | 7930     | 7330    | 7680   | -790   | 630  | -1210 | C0 |
| ATOM        | 10080 | CE       | LYS D 34 | -23.198 | 28.442 | 28.482 | 1.00 | 62.58 | C0 |
| ANISOU10080 | CE    | LYS D 34 | 8270     | 7570    | 7940   | -770   | 610  | -1380 | C0 |
| ATOM        | 10081 | NZ       | LYS D 34 | -22.180 | 29.521 | 28.470 | 1.00 | 65.35 | N0 |
| ANISOU10081 | NZ    | LYS D 34 | 8710     | 7740    | 8380   | -920   | 620  | -1490 | N0 |
| ATOM        | 10082 | H        | LYS D 34 | -22.449 | 23.016 | 25.702 | 1.00 | 51.10 | H0 |
| ANISOU10082 | H     | LYS D 34 | 6440     | 6610    | 6370   | -810   | 600  | -870  | H0 |
| ATOM        | 10083 | HA       | LYS D 34 | -22.040 | 24.932 | 27.690 | 1.00 | 52.73 | H0 |
| ANISOU10083 | HA    | LYS D 34 | 6700     | 6750    | 6590   | -850   | 570  | -1130 | H0 |
| ATOM        | 10084 | HB2      | LYS D 34 | -23.264 | 25.523 | 25.608 | 1.00 | 54.06 | H0 |
| ANISOU10084 | HB2   | LYS D 34 | 7000     | 6700    | 6830   | -770   | 630  | -950  | H0 |
| ATOM        | 10085 | HB3      | LYS D 34 | -24.460 | 24.693 | 26.226 | 1.00 | 53.27 | H0 |
| ANISOU10085 | HB3   | LYS D 34 | 6840     | 6750    | 6650   | -640   | 610  | -930  | H0 |
| ATOM        | 10086 | HG2      | LYS D 34 | -24.957 | 26.807 | 26.781 | 1.00 | 57.29 | H0 |
| ANISOU10086 | HG2   | LYS D 34 | 7510     | 7030    | 7230   | -570   | 640  | -1060 | H0 |
| ATOM        | 10087 | HG3      | LYS D 34 | -24.367 | 26.210 | 28.125 | 1.00 | 57.17 | H0 |
| ANISOU10087 | HG3   | LYS D 34 | 7400     | 7180    | 7140   | -620   | 600  | -1170 | H0 |
| ATOM        | 10088 | HD2      | LYS D 34 | -22.209 | 27.180 | 27.201 | 1.00 | 59.79 | H0 |
| ANISOU10088 | HD2   | LYS D 34 | 7800     | 7310    | 7600   | -890   | 610  | -1210 | H0 |
| ATOM        | 10089 | HD3      | LYS D 34 | -23.218 | 28.145 | 26.451 | 1.00 | 60.49 | H0 |
| ANISOU10089 | HD3   | LYS D 34 | 8020     | 7210    | 7750   | -790   | 650  | -1150 | H0 |
| ATOM        | 10090 | HE2      | LYS D 34 | -24.085 | 28.844 | 28.535 | 1.00 | 63.07 | H0 |
| ANISOU10090 | HE2   | LYS D 34 | 8390     | 7570    | 8000   | -650   | 640  | -1390 | H0 |
| ATOM        | 10091 | HE3      | LYS D 34 | -23.066 | 27.891 | 29.276 | 1.00 | 62.41 | H0 |
| ANISOU10091 | HE3   | LYS D 34 | 8170     | 7690    | 7850   | -760   | 580  | -1430 | H0 |
| ATOM        | 10092 | HZ1      | LYS D 34 | -21.349 | 29.159 | 28.440 | 1.00 | 64.74 | H0 |
| ANISOU10092 | HZ1   | LYS D 34 | 8560     | 7740    | 8300   | -1030  | 600  | -1490 | H0 |
| ATOM        | 10093 | HZ2      | LYS D 34 | -22.258 | 30.025 | 29.220 | 1.00 | 66.01 | H0 |
| ANISOU10093 | HZ2   | LYS D 34 | 8840     | 7800    | 8440   | -910   | 610  | -1610 | H0 |
| ATOM        | 10094 | HZ3      | LYS D 34 | -22.301 | 30.049 | 27.743 | 1.00 | 65.38 | H0 |
| ANISOU10094 | HZ3   | LYS D 34 | 8790     | 7600    | 8450   | -930   | 650  | -1430 | H0 |
| ATOM        | 10095 | N        | PHE D 35 | -22.879 | 23.366 | 29.442 | 1.00 | 47.69 | N0 |
| ANISOU10095 | N     | PHE D 35 | 5930     | 6420    | 5780   | -710   | 520  | -1130 | N0 |
| ATOM        | 10096 | CA       | PHE D 35 | -23.382 | 22.422 | 30.476 | 1.00 | 46.25 | C0 |

|             |     |          |         |        |        |       |       |       |    |
|-------------|-----|----------|---------|--------|--------|-------|-------|-------|----|
| ANISOU10096 | CA  | PHE D 35 | 5670    | 6420   | 5490   | -630  | 500   | -1110 | C0 |
| ATOM 10097  | C   | PHE D 35 | -24.727 | 22.927 | 30.995 | 1.00  | 45.12 |       | C0 |
| ANISOU10097 | C   | PHE D 35 | 5560    | 6280   | 5300   | -520  | 530   | -1140 | C0 |
| ATOM 10098  | O   | PHE D 35 | -24.827 | 24.096 | 31.409 | 1.00  | 46.37 |       | O0 |
| ANISOU10098 | O   | PHE D 35 | 5790    | 6350   | 5470   | -500  | 530   | -1260 | O0 |
| ATOM 10099  | CB  | PHE D 35 | -22.337 | 22.195 | 31.571 | 1.00  | 46.88 |       | C0 |
| ANISOU10099 | CB  | PHE D 35 | 5680    | 6640   | 5500   | -680  | 460   | -1190 | C0 |
| ATOM 10100  | CG  | PHE D 35 | -21.115 | 21.480 | 31.057 | 1.00  | 45.88 |       | C0 |
| ANISOU10100 | CG  | PHE D 35 | 5480    | 6540   | 5410   | -760  | 440   | -1120 | C0 |
| ATOM 10101  | CD1 | PHE D 35 | -21.070 | 20.095 | 31.013 | 1.00  | 44.83 |       | C0 |
| ANISOU10101 | CD1 | PHE D 35 | 5280    | 6510   | 5240   | -710  | 440   | -1000 | C0 |
| ATOM 10102  | CD2 | PHE D 35 | -20.031 | 22.190 | 30.571 | 1.00  | 46.29 |       | C0 |
| ANISOU10102 | CD2 | PHE D 35 | 5530    | 6520   | 5530   | -870  | 430   | -1180 | C0 |
| ATOM 10103  | CE1 | PHE D 35 | -19.956 | 19.437 | 30.515 | 1.00  | 44.52 |       | C0 |
| ANISOU10103 | CE1 | PHE D 35 | 5180    | 6500   | 5240   | -760  | 440   | -950  | C0 |
| ATOM 10104  | CE2 | PHE D 35 | -18.919 | 21.530 | 30.071 | 1.00  | 46.28 |       | C0 |
| ANISOU10104 | CE2 | PHE D 35 | 5450    | 6570   | 5560   | -930  | 430   | -1120 | C0 |
| ATOM 10105  | CZ  | PHE D 35 | -18.884 | 20.156 | 30.043 | 1.00  | 45.02 |       | C0 |
| ANISOU10105 | CZ  | PHE D 35 | 5220    | 6520   | 5370   | -860  | 430   | -1010 | C0 |
| ATOM 10106  | H   | PHE D 35 | -22.211 | 23.905 | 29.749 | 1.00  | 48.61 |       | H0 |
| ANISOU10106 | H   | PHE D 35 | 6050    | 6510   | 5910   | -770  | 510   | -1210 | H0 |
| ATOM 10107  | HA  | PHE D 35 | -23.541 | 21.551 | 30.032 | 1.00  | 45.29 |       | H0 |
| ANISOU10107 | HA  | PHE D 35 | 5510    | 6330   | 5370   | -620  | 510   | -1010 | H0 |
| ATOM 10108  | HB2 | PHE D 35 | -22.072 | 23.063 | 31.941 | 1.00  | 47.70 |       | H0 |
| ANISOU10108 | HB2 | PHE D 35 | 5820    | 6700   | 5610   | -720  | 440   | -1300 | H0 |
| ATOM 10109  | HB3 | PHE D 35 | -22.742 | 21.667 | 32.290 | 1.00  | 46.74 |       | H0 |
| ANISOU10109 | HB3 | PHE D 35 | 5620    | 6730   | 5410   | -620  | 450   | -1170 | H0 |
| ATOM 10110  | HD1 | PHE D 35 | -21.805 | 19.596 | 31.332 | 1.00  | 44.56 |       | H0 |
| ANISOU10110 | HD1 | PHE D 35 | 5240    | 6520   | 5170   | -650  | 450   | -960  | H0 |
| ATOM 10111  | HD2 | PHE D 35 | -20.050 | 23.134 | 30.583 | 1.00  | 47.09 |       | H0 |
| ANISOU10111 | HD2 | PHE D 35 | 5690    | 6530   | 5670   | -910  | 440   | -1260 | H0 |
| ATOM 10112  | HE1 | PHE D 35 | -19.935 | 18.494 | 30.500 | 1.00  | 44.15 |       | H0 |
| ANISOU10112 | HE1 | PHE D 35 | 5100    | 6500   | 5180   | -710  | 440   | -870  | H0 |
| ATOM 10113  | HE2 | PHE D 35 | -18.183 | 22.027 | 29.753 | 1.00  | 46.68 |       | H0 |
| ANISOU10113 | HE2 | PHE D 35 | 5490    | 6590   | 5660   | -1020 | 430   | -1160 | H0 |
| ATOM 10114  | HZ  | PHE D 35 | -18.122 | 19.708 | 29.710 | 1.00  | 45.16 |       | H0 |
| ANISOU10114 | HZ  | PHE D 35 | 5190    | 6570   | 5400   | -880  | 440   | -970  | H0 |
| ATOM 10115  | N   | ILE D 36 | -25.740 | 22.061 | 30.916 | 1.00  | 43.48 |       | N0 |
| ANISOU10115 | N   | ILE D 36 | 5310    | 6150   | 5060   | -450  | 540   | -1030 | N0 |
| ATOM 10116  | CA  | ILE D 36 | -27.142 | 22.344 | 31.338 | 1.00  | 43.25 |       | C0 |
| ANISOU10116 | CA  | ILE D 36 | 5280    | 6170   | 4980   | -330  | 570   | -1030 | C0 |
| ATOM 10117  | C   | ILE D 36 | -27.388 | 21.694 | 32.700 | 1.00  | 43.13 |       | C0 |
| ANISOU10117 | C   | ILE D 36 | 5190    | 6360   | 4840   | -280  | 570   | -1040 | C0 |
| ATOM 10118  | O   | ILE D 36 | -28.122 | 22.288 | 33.507 | 1.00  | 43.76 |       | O0 |
| ANISOU10118 | O   | ILE D 36 | 5270    | 6500   | 4860   | -190  | 600   | -1120 | O0 |
| ATOM 10119  | CB  | ILE D 36 | -28.153 | 21.847 | 30.289 | 1.00  | 42.23 |       | C0 |
| ANISOU10119 | CB  | ILE D 36 | 5130    | 6030   | 4890   | -300  | 590   | -890  | C0 |
| ATOM 10120  | CG1 | ILE D 36 | -27.756 | 22.245 | 28.863 | 1.00  | 41.98 |       | C0 |
| ANISOU10120 | CG1 | ILE D 36 | 5160    | 5830   | 4960   | -350  | 580   | -860  | C0 |
| ATOM 10121  | CG2 | ILE D 36 | -29.556 | 22.321 | 30.639 | 1.00  | 43.20 |       | C0 |
| ANISOU10121 | CG2 | ILE D 36 | 5230    | 6210   | 4980   | -170  | 620   | -890  | C0 |
| ATOM 10122  | CD1 | ILE D 36 | -27.511 | 23.726 | 28.658 | 1.00  | 42.63 |       | C0 |
| ANISOU10122 | CD1 | ILE D 36 | 5350    | 5750   | 5100   | -330  | 600   | -950  | C0 |
| ATOM 10123  | H   | ILE D 36 | -25.635 | 21.222 | 30.577 | 1.00  | 42.81 |       | H0 |

|             |      |          |         |        |        |      |       |       |    |
|-------------|------|----------|---------|--------|--------|------|-------|-------|----|
| ANISOU10123 | H    | ILE D 36 | 5190    | 6100   | 4970   | -470 | 540   | -950  | H0 |
| ATOM 10124  | HA   | ILE D 36 | -27.248 | 23.307 | 31.435 | 1.00 | 44.03 |       | H0 |
| ANISOU10124 | HA   | ILE D 36 | 5430    | 6190   | 5100   | -290 | 580   | -1110 | H0 |
| ATOM 10125  | HB   | ILE D 36 | -28.155 | 20.859 | 30.328 | 1.00 | 41.76 |       | H0 |
| ANISOU10125 | HB   | ILE D 36 | 5010    | 6050   | 4810   | -330 | 580   | -820  | H0 |
| ATOM 10126  | HG12 | ILE D 36 | -26.942 | 21.757 | 28.618 | 1.00 | 41.33 |       | H0 |
| ANISOU10126 | HG12 | ILE D 36 | 5070    | 5740   | 4890   | -430 | 570   | -840  | H0 |
| ATOM 10127  | HG13 | ILE D 36 | -28.468 | 21.961 | 28.251 | 1.00 | 41.57 |       | H0 |
| ANISOU10127 | HG13 | ILE D 36 | 5090    | 5790   | 4910   | -330 | 590   | -780  | H0 |
| ATOM 10128  | HG21 | ILE D 36 | -29.882 | 21.834 | 31.416 | 1.00 | 43.33 |       | H0 |
| ANISOU10128 | HG21 | ILE D 36 | 5180    | 6360   | 4920   | -140 | 630   | -890  | H0 |
| ATOM 10129  | HG22 | ILE D 36 | -30.151 | 22.163 | 29.887 | 1.00 | 42.87 |       | H0 |
| ANISOU10129 | HG22 | ILE D 36 | 5170    | 6150   | 4970   | -150 | 620   | -820  | H0 |
| ATOM 10130  | HG23 | ILE D 36 | -29.538 | 23.273 | 30.841 | 1.00 | 43.96 |       | H0 |
| ANISOU10130 | HG23 | ILE D 36 | 5380    | 6230   | 5090   | -120 | 640   | -980  | H0 |
| ATOM 10131  | HD11 | ILE D 36 | -28.338 | 24.217 | 28.806 | 1.00 | 43.35 |       | H0 |
| ANISOU10131 | HD11 | ILE D 36 | 5450    | 5830   | 5190   | -240 | 620   | -950  | H0 |
| ATOM 10132  | HD12 | ILE D 36 | -27.202 | 23.880 | 27.750 | 1.00 | 42.50 |       | H0 |
| ANISOU10132 | HD12 | ILE D 36 | 5370    | 5640   | 5140   | -380 | 600   | -900  | H0 |
| ATOM 10133  | HD13 | ILE D 36 | -26.834 | 24.036 | 29.284 | 1.00 | 43.19 |       | H0 |
| ANISOU10133 | HD13 | ILE D 36 | 5430    | 5810   | 5160   | -370 | 590   | -1040 | H0 |
| ATOM 10134  | N    | ASN D 37 | -26.826 | 20.508 | 32.942 | 1.00 | 42.08 |       | N0 |
| ANISOU10134 | N    | ASN D 37 | 4990    | 6330   | 4670   | -340 | 550   | -960  | N0 |
| ATOM 10135  | CA   | ASN D 37 | -27.076 | 19.784 | 34.211 | 1.00 | 42.42 |       | C0 |
| ANISOU10135 | CA   | ASN D 37 | 4960    | 6570   | 4590   | -300 | 550   | -940  | C0 |
| ATOM 10136  | C    | ASN D 37 | -25.938 | 18.802 | 34.491 | 1.00 | 42.19 |       | C0 |
| ANISOU10136 | C    | ASN D 37 | 4890    | 6600   | 4530   | -360 | 510   | -880  | C0 |
| ATOM 10137  | O    | ASN D 37 | -25.272 | 18.377 | 33.538 | 1.00 | 40.71 |       | O0 |
| ANISOU10137 | O    | ASN D 37 | 4710    | 6320   | 4440   | -420 | 500   | -830  | O0 |
| ATOM 10138  | CB   | ASN D 37 | -28.449 | 19.105 | 34.200 | 1.00 | 41.88 |       | C0 |
| ANISOU10138 | CB   | ASN D 37 | 4840    | 6580   | 4490   | -240 | 590   | -810  | C0 |
| ATOM 10139  | CG   | ASN D 37 | -29.153 | 19.189 | 35.536 | 1.00 | 42.66 |       | C0 |
| ANISOU10139 | CG   | ASN D 37 | 4890    | 6860   | 4450   | -160 | 630   | -840  | C0 |
| ATOM 10140  | OD1  | ASN D 37 | -28.525 | 19.036 | 36.578 | 1.00 | 43.72 |       | O0 |
| ANISOU10140 | OD1  | ASN D 37 | 5010    | 7120   | 4480   | -150 | 610   | -880  | O0 |
| ATOM 10141  | ND2  | ASN D 37 | -30.452 | 19.440 | 35.518 | 1.00 | 42.87 |       | N0 |
| ANISOU10141 | ND2  | ASN D 37 | 4880    | 6940   | 4470   | -80  | 680   | -820  | N0 |
| ATOM 10142  | H    | ASN D 37 | -26.280 | 20.076 | 32.355 | 1.00 | 41.51 |       | H0 |
| ANISOU10142 | H    | ASN D 37 | 4920    | 6210   | 4650   | -390 | 530   | -910  | H0 |
| ATOM 10143  | HA   | ASN D 37 | -27.085 | 20.450 | 34.938 | 1.00 | 43.28 |       | H0 |
| ANISOU10143 | HA   | ASN D 37 | 5090    | 6720   | 4640   | -260 | 550   | -1040 | H0 |
| ATOM 10144  | HB2  | ASN D 37 | -29.008 | 19.528 | 33.517 | 1.00 | 41.71 |       | H0 |
| ANISOU10144 | HB2  | ASN D 37 | 4840    | 6480   | 4530   | -220 | 610   | -810  | H0 |
| ATOM 10145  | HB3  | ASN D 37 | -28.336 | 18.163 | 33.958 | 1.00 | 41.32 |       | H0 |
| ANISOU10145 | HB3  | ASN D 37 | 4740    | 6520   | 4430   | -280 | 590   | -710  | H0 |
| ATOM 10146  | HD21 | ASN D 37 | -30.821 | 19.909 | 36.170 | 1.00 | 43.83 |       | H0 |
| ANISOU10146 | HD21 | ASN D 37 | 5000    | 7130   | 4520   | -10  | 710   | -880  | H0 |
| ATOM 10147  | HD22 | ASN D 37 | -30.951 | 19.138 | 34.853 | 1.00 | 42.48 |       | H0 |
| ANISOU10147 | HD22 | ASN D 37 | 4810    | 6860   | 4470   | -100 | 690   | -740  | H0 |
| ATOM 10148  | N    | ILE D 38 | -25.714 | 18.536 | 35.780 | 1.00 | 43.62 |       | N0 |
| ANISOU10148 | N    | ILE D 38 | 5030    | 6960   | 4590   | -320 | 490   | -900  | N0 |
| ATOM 10149  | CA   | ILE D 38 | -24.877 | 17.427 | 36.322 | 1.00 | 44.43 |       | C0 |
| ANISOU10149 | CA   | ILE D 38 | 5070    | 7180   | 4630   | -340 | 460   | -810  | C0 |
| ATOM 10150  | C    | ILE D 38 | -25.805 | 16.619 | 37.228 | 1.00 | 45.76 |       | C0 |

|             |      |          |         |        |        |      |       |       |    |
|-------------|------|----------|---------|--------|--------|------|-------|-------|----|
| ANISOU10150 | C    | ILE D 38 | 5200    | 7510   | 4680   | -270 | 500   | -690  | C0 |
| ATOM 10151  | O    | ILE D 38 | -26.254 | 17.176 | 38.256 | 1.00 | 46.52 |       | O0 |
| ANISOU10151 | O    | ILE D 38 | 5280    | 7740   | 4650   | -220 | 510   | -770  | O0 |
| ATOM 10152  | CB   | ILE D 38 | -23.646 | 17.970 | 37.078 | 1.00 | 45.66 |       | C0 |
| ANISOU10152 | CB   | ILE D 38 | 5210    | 7420   | 4720   | -360 | 400   | -930  | C0 |
| ATOM 10153  | CG1  | ILE D 38 | -22.790 | 18.878 | 36.189 | 1.00 | 45.55 |       | C0 |
| ANISOU10153 | CG1  | ILE D 38 | 5230    | 7250   | 4820   | -450 | 370   | -1040 | C0 |
| ATOM 10154  | CG2  | ILE D 38 | -22.835 | 16.828 | 37.672 | 1.00 | 45.90 |       | C0 |
| ANISOU10154 | CG2  | ILE D 38 | 5160    | 7600   | 4680   | -350 | 360   | -810  | C0 |
| ATOM 10155  | CD1  | ILE D 38 | -21.659 | 19.580 | 36.908 | 1.00 | 46.79 |       | C0 |
| ANISOU10155 | CD1  | ILE D 38 | 5360    | 7500   | 4920   | -500 | 300   | -1190 | C0 |
| ATOM 10156  | H    | ILE D 38 | -26.076 | 19.048 | 36.440 | 1.00 | 44.43 |       | H0 |
| ANISOU10156 | H    | ILE D 38 | 5140    | 7130   | 4620   | -280 | 500   | -970  | H0 |
| ATOM 10157  | HA   | ILE D 38 | -24.576 | 16.865 | 35.587 | 1.00 | 43.75 |       | H0 |
| ANISOU10157 | HA   | ILE D 38 | 4990    | 7010   | 4620   | -370 | 460   | -730  | H0 |
| ATOM 10158  | HB   | ILE D 38 | -23.979 | 18.521 | 37.829 | 1.00 | 46.48 |       | H0 |
| ANISOU10158 | HB   | ILE D 38 | 5320    | 7610   | 4730   | -330 | 400   | -1010 | H0 |
| ATOM 10159  | HG12 | ILE D 38 | -22.410 | 18.337 | 35.464 | 1.00 | 44.76 |       | H0 |
| ANISOU10159 | HG12 | ILE D 38 | 5120    | 7090   | 4800   | -470 | 370   | -960  | H0 |
| ATOM 10160  | HG13 | ILE D 38 | -23.368 | 19.556 | 35.783 | 1.00 | 45.34 |       | H0 |
| ANISOU10160 | HG13 | ILE D 38 | 5260    | 7120   | 4840   | -450 | 400   | -1090 | H0 |
| ATOM 10161  | HG21 | ILE D 38 | -23.370 | 16.354 | 38.332 | 1.00 | 46.35 |       | H0 |
| ANISOU10161 | HG21 | ILE D 38 | 5210    | 7760   | 4650   | -300 | 380   | -750  | H0 |
| ATOM 10162  | HG22 | ILE D 38 | -22.037 | 17.180 | 38.101 | 1.00 | 46.66 |       | H0 |
| ANISOU10162 | HG22 | ILE D 38 | 5230    | 7770   | 4730   | -370 | 310   | -890  | H0 |
| ATOM 10163  | HG23 | ILE D 38 | -22.575 | 16.211 | 36.965 | 1.00 | 45.20 |       | H0 |
| ANISOU10163 | HG23 | ILE D 38 | 5070    | 7430   | 4670   | -360 | 370   | -730  | H0 |
| ATOM 10164  | HD11 | ILE D 38 | -21.975 | 19.911 | 37.767 | 1.00 | 47.69 |       | H0 |
| ANISOU10164 | HD11 | ILE D 38 | 5480    | 7710   | 4940   | -470 | 290   | -1260 | H0 |
| ATOM 10165  | HD12 | ILE D 38 | -21.345 | 20.327 | 36.370 | 1.00 | 46.82 |       | H0 |
| ANISOU10165 | HD12 | ILE D 38 | 5400    | 7380   | 5000   | -570 | 300   | -1270 | H0 |
| ATOM 10166  | HD13 | ILE D 38 | -20.926 | 18.956 | 37.052 | 1.00 | 46.89 |       | H0 |
| ANISOU10166 | HD13 | ILE D 38 | 5310    | 7590   | 4910   | -510 | 270   | -1130 | H0 |
| ATOM 10167  | N    | LEU D 39 | -26.122 | 15.386 | 36.832 | 1.00 | 46.65 |       | N0 |
| ANISOU10167 | N    | LEU D 39 | 5300    | 7590   | 4840   | -290 | 520   | -520  | N0 |
| ATOM 10168  | CA   | LEU D 39 | -27.261 | 14.613 | 37.391 | 1.00 | 49.22 |       | C0 |
| ANISOU10168 | CA   | LEU D 39 | 5590    | 8020   | 5090   | -260 | 580   | -390  | C0 |
| ATOM 10169  | C    | LEU D 39 | -26.757 | 13.585 | 38.403 | 1.00 | 51.68 |       | C0 |
| ANISOU10169 | C    | LEU D 39 | 5870    | 8480   | 5290   | -240 | 570   | -270  | C0 |
| ATOM 10170  | O    | LEU D 39 | -27.346 | 13.510 | 39.496 | 1.00 | 53.32 |       | O0 |
| ANISOU10170 | O    | LEU D 39 | 6040    | 8860   | 5360   | -190 | 600   | -230  | O0 |
| ATOM 10171  | CB   | LEU D 39 | -28.018 | 13.948 | 36.241 | 1.00 | 48.43 |       | C0 |
| ANISOU10171 | CB   | LEU D 39 | 5510    | 7790   | 5110   | -320 | 610   | -290  | C0 |
| ATOM 10172  | CG   | LEU D 39 | -28.681 | 14.924 | 35.273 | 1.00 | 48.12 |       | C0 |
| ANISOU10172 | CG   | LEU D 39 | 5490    | 7640   | 5160   | -330 | 620   | -380  | C0 |
| ATOM 10173  | CD1  | LEU D 39 | -29.292 | 14.185 | 34.102 | 1.00 | 48.07 |       | C0 |
| ANISOU10173 | CD1  | LEU D 39 | 5490    | 7520   | 5250   | -400 | 630   | -280  | C0 |
| ATOM 10174  | CD2  | LEU D 39 | -29.736 | 15.764 | 35.982 | 1.00 | 49.06 |       | C0 |
| ANISOU10174 | CD2  | LEU D 39 | 5560    | 7880   | 5190   | -250 | 660   | -440  | C0 |
| ATOM 10175  | H    | LEU D 39 | -25.656 | 14.942 | 36.188 | 1.00 | 46.20 |       | H0 |
| ANISOU10175 | H    | LEU D 39 | 5250    | 7450   | 4850   | -320 | 510   | -480  | H0 |
| ATOM 10176  | HA   | LEU D 39 | -27.861 | 15.238 | 37.857 | 1.00 | 49.66 |       | H0 |
| ANISOU10176 | HA   | LEU D 39 | 5630    | 8150   | 5080   | -220 | 600   | -450  | H0 |
| ATOM 10177  | HB2  | LEU D 39 | -27.392 | 13.386 | 35.740 | 1.00 | 48.01 |       | H0 |

|             |               |         |        |        |      |       |      |    |
|-------------|---------------|---------|--------|--------|------|-------|------|----|
| ANISOU10177 | HB2 LEU D 39  | 5480    | 7640   | 5120   | -350 | 590   | -240 | H0 |
| ATOM 10178  | HB3 LEU D 39  | -28.706 | 13.364 | 36.618 | 1.00 | 48.94 |      | H0 |
| ANISOU10178 | HB3 LEU D 39  | 5540    | 7920   | 5140   | -320 | 640   | -190 | H0 |
| ATOM 10179  | HG LEU D 39   | -27.986 | 15.534 | 34.923 | 1.00 | 47.85 |      | H0 |
| ANISOU10179 | HG LEU D 39   | 5490    | 7530   | 5160   | -330 | 590   | -470 | H0 |
| ATOM 10180  | HD11 LEU D 39 | -28.612 | 13.636 | 33.673 | 1.00 | 47.42 |      | H0 |
| ANISOU10180 | HD11 LEU D 39 | 5440    | 7360   | 5220   | -440 | 610   | -250 | H0 |
| ATOM 10181  | HD12 LEU D 39 | -29.643 | 14.826 | 33.460 | 1.00 | 47.52 |      | H0 |
| ANISOU10181 | HD12 LEU D 39 | 5430    | 7390   | 5230   | -400 | 630   | -330 | H0 |
| ATOM 10182  | HD13 LEU D 39 | -30.014 | 13.617 | 34.419 | 1.00 | 48.29 |      | H0 |
| ANISOU10182 | HD13 LEU D 39 | 5480    | 7620   | 5250   | -410 | 660   | -190 | H0 |
| ATOM 10183  | HD21 LEU D 39 | -30.311 | 15.184 | 36.511 | 1.00 | 49.58 |      | H0 |
| ANISOU10183 | HD21 LEU D 39 | 5580    | 8060   | 5200   | -250 | 690   | -350 | H0 |
| ATOM 10184  | HD22 LEU D 39 | -30.271 | 16.236 | 35.322 | 1.00 | 48.75 |      | H0 |
| ANISOU10184 | HD22 LEU D 39 | 5530    | 7780   | 5210   | -250 | 670   | -470 | H0 |
| ATOM 10185  | HD23 LEU D 39 | -29.301 | 16.409 | 36.566 | 1.00 | 49.51 |      | H0 |
| ANISOU10185 | HD23 LEU D 39 | 5630    | 7980   | 5190   | -210 | 640   | -540 | H0 |
| ATOM 10186  | N GLU D 40    | -25.728 | 12.818 | 38.044 | 1.00 | 52.80 |      | N0 |
| ANISOU10186 | N GLU D 40    | 6020    | 8550   | 5490   | -250 | 530   | -200 | N0 |
| ATOM 10187  | CA GLU D 40   | -25.161 | 11.759 | 38.915 | 1.00 | 55.30 |      | C0 |
| ANISOU10187 | CA GLU D 40   | 6320    | 8980   | 5720   | -210 | 520   | -50  | C0 |
| ATOM 10188  | C GLU D 40    | -23.639 | 11.866 | 38.880 | 1.00 | 54.83 |      | C0 |
| ANISOU10188 | C GLU D 40    | 6230    | 8930   | 5670   | -180 | 450   | -110 | C0 |
| ATOM 10189  | O GLU D 40    | -23.071 | 11.989 | 37.774 | 1.00 | 54.55 |      | O0 |
| ANISOU10189 | O GLU D 40    | 6220    | 8730   | 5770   | -220 | 430   | -160 | O0 |
| ATOM 10190  | CB GLU D 40   | -25.619 | 10.367 | 38.477 | 1.00 | 57.66 |      | C0 |
| ANISOU10190 | CB GLU D 40   | 6650    | 9160   | 6100   | -230 | 570   | 140  | C0 |
| ATOM 10191  | CG GLU D 40   | -25.323 | 9.294  | 39.512 | 1.00 | 61.27 |      | C0 |
| ANISOU10191 | CG GLU D 40   | 7100    | 9730   | 6450   | -170 | 570   | 320  | C0 |
| ATOM 10192  | CD GLU D 40   | -25.961 | 7.942  | 39.238 | 1.00 | 63.36 |      | C0 |
| ANISOU10192 | CD GLU D 40   | 7420    | 9870   | 6780   | -220 | 630   | 520  | C0 |
| ATOM 10193  | OE1 GLU D 40  | -27.211 | 7.882  | 39.134 | 1.00 | 64.54 |      | O0 |
| ANISOU10193 | OE1 GLU D 40  | 7560    | 10020  | 6940   | -290 | 690   | 560  | O0 |
| ATOM 10194  | OE2 GLU D 40  | -25.208 | 6.951  | 39.123 | 1.00 | 64.77 |      | O0 |
| ANISOU10194 | OE2 GLU D 40  | 7640    | 9960   | 7010   | -180 | 630   | 640  | O0 |
| ATOM 10195  | H GLU D 40    | -25.307 | 12.902 | 37.242 | 1.00 | 52.04 |      | H0 |
| ANISOU10195 | H GLU D 40    | 5950    | 8330   | 5490   | -280 | 520   | -230 | H0 |
| ATOM 10196  | HA GLU D 40   | -25.467 | 11.917 | 39.837 | 1.00 | 56.23 |      | H0 |
| ANISOU10196 | HA GLU D 40   | 6400    | 9250   | 5720   | -170 | 520   | -50  | H0 |
| ATOM 10197  | HB2 GLU D 40  | -26.584 | 10.392 | 38.308 | 1.00 | 57.43 |      | H0 |
| ANISOU10197 | HB2 GLU D 40  | 6620    | 9110   | 6080   | -270 | 610   | 160  | H0 |
| ATOM 10198  | HB3 GLU D 40  | -25.170 | 10.136 | 37.638 | 1.00 | 56.87 |      | H0 |
| ANISOU10198 | HB3 GLU D 40  | 6580    | 8920   | 6100   | -260 | 560   | 140  | H0 |
| ATOM 10199  | HG2 GLU D 40  | -24.352 | 9.169  | 39.570 | 1.00 | 61.32 |      | H0 |
| ANISOU10199 | HG2 GLU D 40  | 7090    | 9750   | 6450   | -130 | 530   | 320  | H0 |
| ATOM 10200  | HG3 GLU D 40  | -25.631 | 9.607  | 40.389 | 1.00 | 61.91 |      | H0 |
| ANISOU10200 | HG3 GLU D 40  | 7140    | 9980   | 6410   | -150 | 580   | 320  | H0 |
| ATOM 10201  | N VAL D 41    | -23.020 | 11.838 | 40.058 | 1.00 | 54.35 |      | N0 |
| ANISOU10201 | N VAL D 41    | 6120    | 9070   | 5460   | -130 | 400   | -90  | N0 |
| ATOM 10202  | CA VAL D 41   | -21.544 | 11.846 | 40.237 | 1.00 | 54.37 |      | C0 |
| ANISOU10202 | CA VAL D 41   | 6060    | 9150   | 5440   | -100 | 320   | -120 | C0 |
| ATOM 10203  | C VAL D 41    | -21.190 | 10.692 | 41.177 | 1.00 | 55.40 |      | C0 |
| ANISOU10203 | C VAL D 41    | 6160    | 9430   | 5460   | 0    | 300   | 70   | C0 |
| ATOM 10204  | O VAL D 41    | -21.854 | 10.552 | 42.228 | 1.00 | 56.25 |      | O0 |

|                           |         |        |        |      |       |      |    |
|---------------------------|---------|--------|--------|------|-------|------|----|
| ANISOU10204 O VAL D 41    | 6260    | 9700   | 5410   | 30   | 320   | 140  | O0 |
| ATOM 10205 CB VAL D 41    | -21.069 | 13.215 | 40.762 | 1.00 | 55.75 |      | C0 |
| ANISOU10205 CB VAL D 41   | 6200    | 9460   | 5530   | -130 | 250   | -340 | C0 |
| ATOM 10206 CG1 VAL D 41   | -19.628 | 13.180 | 41.228 | 1.00 | 57.00 |      | C0 |
| ANISOU10206 CG1 VAL D 41  | 6260    | 9770   | 5620   | -110 | 160   | -360 | C0 |
| ATOM 10207 CG2 VAL D 41   | -21.260 | 14.308 | 39.719 | 1.00 | 54.88 |      | C0 |
| ANISOU10207 CG2 VAL D 41  | 6140    | 9160   | 5560   | -220 | 270   | -510 | C0 |
| ATOM 10208 H VAL D 41     | -23.476 | 11.814 | 40.847 | 1.00 | 55.42 |      | H0 |
| ANISOU10208 H VAL D 41    | 6240    | 9330   | 5480   | -100 | 410   | -70  | H0 |
| ATOM 10209 HA VAL D 41    | -21.125 | 11.683 | 39.373 | 1.00 | 53.80 |      | H0 |
| ANISOU10209 HA VAL D 41   | 6010    | 8950   | 5490   | -120 | 320   | -120 | H0 |
| ATOM 10210 HB VAL D 41    | -21.631 | 13.441 | 41.542 | 1.00 | 56.36 |      | H0 |
| ANISOU10210 HB VAL D 41   | 6280    | 9650   | 5490   | -110 | 260   | -360 | H0 |
| ATOM 10211 HG11 VAL D 41  | -19.570 | 12.717 | 42.082 | 1.00 | 58.03 |      | H0 |
| ANISOU10211 HG11 VAL D 41 | 6360    | 10060  | 5630   | -50  | 140   | -280 | H0 |
| ATOM 10212 HG12 VAL D 41  | -19.298 | 14.089 | 41.330 | 1.00 | 57.22 |      | H0 |
| ANISOU10212 HG12 VAL D 41 | 6270    | 9830   | 5630   | -160 | 120   | -520 | H0 |
| ATOM 10213 HG13 VAL D 41  | -19.091 | 12.714 | 40.567 | 1.00 | 56.45 |      | H0 |
| ANISOU10213 HG13 VAL D 41 | 6180    | 9610   | 5660   | -100 | 160   | -300 | H0 |
| ATOM 10214 HG21 VAL D 41  | -20.613 | 14.190 | 39.002 | 1.00 | 54.25 |      | H0 |
| ANISOU10214 HG21 VAL D 41 | 6050    | 8990   | 5580   | -240 | 260   | -510 | H0 |
| ATOM 10215 HG22 VAL D 41  | -21.130 | 15.177 | 40.134 | 1.00 | 55.31 |      | H0 |
| ANISOU10215 HG22 VAL D 41 | 6180    | 9280   | 5550   | -240 | 240   | -650 | H0 |
| ATOM 10216 HG23 VAL D 41  | -22.160 | 14.257 | 39.354 | 1.00 | 54.09 |      | H0 |
| ANISOU10216 HG23 VAL D 41 | 6080    | 8970   | 5500   | -220 | 320   | -480 | H0 |
| ATOM 10217 N ASN D 42     | -20.211 | 9.876  | 40.789 | 1.00 | 54.72 |      | N0 |
| ANISOU10217 N ASN D 42    | 6060    | 9290   | 5440   | 50   | 280   | 180  | N0 |
| ATOM 10218 CA ASN D 42    | -19.745 | 8.708  | 41.578 | 1.00 | 56.19 |      | C0 |
| ANISOU10218 CA ASN D 42   | 6220    | 9590   | 5540   | 170  | 270   | 390  | C0 |
| ATOM 10219 C ASN D 42     | -18.238 | 8.852  | 41.809 | 1.00 | 57.30 |      | C0 |
| ANISOU10219 C ASN D 42    | 6250    | 9880   | 5640   | 230  | 170   | 360  | C0 |
| ATOM 10220 O ASN D 42     | -17.468 | 8.689  | 40.844 | 1.00 | 56.16 |      | O0 |
| ANISOU10220 O ASN D 42    | 6090    | 9610   | 5640   | 240  | 170   | 340  | O0 |
| ATOM 10221 CB ASN D 42    | -20.115 | 7.389  | 40.899 | 1.00 | 55.41 |      | C0 |
| ANISOU10221 CB ASN D 42   | 6210    | 9260   | 5580   | 190  | 350   | 580  | C0 |
| ATOM 10222 CG ASN D 42    | -19.942 | 6.198  | 41.816 | 1.00 | 57.04 |      | C0 |
| ANISOU10222 CG ASN D 42   | 6430    | 9560   | 5690   | 310  | 360   | 830  | C0 |
| ATOM 10223 OD1 ASN D 42   | -19.100 | 6.218  | 42.710 | 1.00 | 57.70 |      | O0 |
| ANISOU10223 OD1 ASN D 42  | 6430    | 9870   | 5630   | 410  | 280   | 870  | O0 |
| ATOM 10224 ND2 ASN D 42   | -20.733 | 5.160  | 41.607 | 1.00 | 57.44 |      | N0 |
| ANISOU10224 ND2 ASN D 42  | 6580    | 9430   | 5810   | 300  | 440   | 1000 | N0 |
| ATOM 10225 H ASN D 42     | -19.762 | 9.988  | 40.004 | 1.00 | 54.20 |      | H0 |
| ANISOU10225 H ASN D 42    | 5990    | 9110   | 5490   | 30   | 280   | 130  | H0 |
| ATOM 10226 HA ASN D 42    | -20.197 | 8.727  | 42.453 | 1.00 | 56.98 |      | H0 |
| ANISOU10226 HA ASN D 42   | 6310    | 9830   | 5510   | 190  | 270   | 430  | H0 |
| ATOM 10227 HB2 ASN D 42   | -21.048 | 7.435  | 40.607 | 1.00 | 54.81 |      | H0 |
| ANISOU10227 HB2 ASN D 42  | 6190    | 9090   | 5540   | 130  | 400   | 570  | H0 |
| ATOM 10228 HB3 ASN D 42   | -19.555 | 7.270  | 40.107 | 1.00 | 54.93 |      | H0 |
| ANISOU10228 HB3 ASN D 42  | 6160    | 9080   | 5630   | 200  | 350   | 550  | H0 |
| ATOM 10229 HD21 ASN D 42  | -20.789 | 4.517  | 42.211 | 1.00 | 58.55 |      | H0 |
| ANISOU10229 HD21 ASN D 42 | 6740    | 9620   | 5890   | 360  | 450   | 1150 | H0 |
| ATOM 10230 HD22 ASN D 42  | -21.207 | 5.107  | 40.862 | 1.00 | 56.40 |      | H0 |
| ANISOU10230 HD22 ASN D 42 | 6510    | 9130   | 5790   | 230  | 480   | 960  | H0 |
| ATOM 10231 N GLU D 43     | -17.849 | 9.145  | 43.051 | 1.00 | 59.35 |      | N0 |



|             |      |          |         |        |        |      |       |      |    |
|-------------|------|----------|---------|--------|--------|------|-------|------|----|
| ANISOU10231 | N    | GLU D 43 | 6420    | 10430  | 5700   | 280  | 100   | 350  | N0 |
| ATOM 10232  | CA   | GLU D 43 | -16.447 | 9.431  | 43.450 | 1.00 | 61.57 |      | C0 |
| ANISOU10232 | CA   | GLU D 43 | 6570    | 10920  | 5910   | 320  | -20   | 300  | C0 |
| ATOM 10233  | C    | GLU D 43 | -15.649 | 8.121  | 43.503 | 1.00 | 62.17 |      | C0 |
| ANISOU10233 | C    | GLU D 43 | 6600    | 11020  | 6000   | 480  | -30   | 530  | C0 |
| ATOM 10234  | O    | GLU D 43 | -14.426 | 8.178  | 43.285 | 1.00 | 64.16 |      | O0 |
| ANISOU10234 | O    | GLU D 43 | 6740    | 11360  | 6280   | 520  | -90   | 510  | O0 |
| ATOM 10235  | CB   | GLU D 43 | -16.422 | 10.178 | 44.786 | 1.00 | 64.52 |      | C0 |
| ANISOU10235 | CB   | GLU D 43 | 6870    | 11600  | 6040   | 310  | -100  | 190  | C0 |
| ATOM 10236  | CG   | GLU D 43 | -15.046 | 10.703 | 45.157 | 1.00 | 67.42 |      | C0 |
| ANISOU10236 | CG   | GLU D 43 | 7090    | 12210  | 6320   | 300  | -240  | 90   | C0 |
| ATOM 10237  | CD   | GLU D 43 | -15.023 | 11.783 | 46.227 | 1.00 | 69.93 |      | C0 |
| ANISOU10237 | CD   | GLU D 43 | 7360    | 12790  | 6430   | 230  | -330  | -110 | C0 |
| ATOM 10238  | OE1  | GLU D 43 | -13.963 | 12.425 | 46.389 | 1.00 | 71.84 |      | O0 |
| ANISOU10238 | OE1  | GLU D 43 | 7480    | 13190  | 6630   | 170  | -440  | -250 | O0 |
| ATOM 10239  | OE2  | GLU D 43 | -16.061 | 11.982 | 46.896 | 1.00 | 71.03 |      | O0 |
| ANISOU10239 | OE2  | GLU D 43 | 7580    | 12970  | 6440   | 230  | -280  | -130 | O0 |
| ATOM 10240  | H    | GLU D 43 | -18.437 | 9.186  | 43.747 | 1.00 | 60.00 |      | H0 |
| ANISOU10240 | H    | GLU D 43 | 6520    | 10610  | 5670   | 280  | 110   | 370  | H0 |
| ATOM 10241  | HA   | GLU D 43 | -16.046 | 10.007 | 42.762 | 1.00 | 60.74 |      | H0 |
| ANISOU10241 | HA   | GLU D 43 | 6440    | 10740  | 5900   | 250  | -30   | 170  | H0 |
| ATOM 10242  | HB2  | GLU D 43 | -17.049 | 10.929 | 44.736 | 1.00 | 63.84 |      | H0 |
| ANISOU10242 | HB2  | GLU D 43 | 6830    | 11470  | 5950   | 230  | -80   | 50   | H0 |
| ATOM 10243  | HB3  | GLU D 43 | -16.733 | 9.571  | 45.491 | 1.00 | 65.49 |      | H0 |
| ANISOU10243 | HB3  | GLU D 43 | 7010    | 11830  | 6050   | 390  | -90   | 340  | H0 |
| ATOM 10244  | HG2  | GLU D 43 | -14.496 | 9.953  | 45.469 | 1.00 | 68.43 |      | H0 |
| ANISOU10244 | HG2  | GLU D 43 | 7160    | 12440  | 6410   | 410  | -270  | 240  | H0 |
| ATOM 10245  | HG3  | GLU D 43 | -14.618 | 11.063 | 44.351 | 1.00 | 66.47 |      | H0 |
| ANISOU10245 | HG3  | GLU D 43 | 6940    | 11970  | 6340   | 240  | -240  | 0    | H0 |
| ATOM 10246  | N    | ILE D 44 | -16.307 | 6.988  | 43.762 | 1.00 | 61.37 |      | N0 |
| ANISOU10246 | N    | ILE D 44 | 6600    | 10830  | 5890   | 570  | 50    | 760  | N0 |
| ATOM 10247  | CA   | ILE D 44 | -15.646 | 5.651  | 43.855 | 1.00 | 62.42 |      | C0 |
| ANISOU10247 | CA   | ILE D 44 | 6730    | 10940  | 6050   | 740  | 50    | 1010 | C0 |
| ATOM 10248  | C    | ILE D 44 | -15.326 | 5.146  | 42.440 | 1.00 | 59.96 |      | C0 |
| ANISOU10248 | C    | ILE D 44 | 6470    | 10330  | 5980   | 750  | 120   | 1020 | C0 |
| ATOM 10249  | O    | ILE D 44 | -14.195 | 4.673  | 42.252 | 1.00 | 60.42 |      | O0 |
| ANISOU10249 | O    | ILE D 44 | 6450    | 10420  | 6080   | 880  | 90    | 1090 | O0 |
| ATOM 10250  | CB   | ILE D 44 | -16.491 | 4.651  | 44.680 | 1.00 | 64.26 |      | C0 |
| ANISOU10250 | CB   | ILE D 44 | 7060    | 11170  | 6190   | 810  | 110   | 1260 | C0 |
| ATOM 10251  | CG1  | ILE D 44 | -16.269 | 4.823  | 46.188 | 1.00 | 67.02 |      | C0 |
| ANISOU10251 | CG1  | ILE D 44 | 7310    | 11890  | 6260   | 890  | 30    | 1330 | C0 |
| ATOM 10252  | CG2  | ILE D 44 | -16.212 | 3.212  | 44.265 | 1.00 | 65.22 |      | C0 |
| ANISOU10252 | CG2  | ILE D 44 | 7270    | 11080  | 6440   | 950  | 180   | 1510 | C0 |
| ATOM 10253  | CD1  | ILE D 44 | -16.553 | 6.212  | 46.717 | 1.00 | 66.87 |      | C0 |
| ANISOU10253 | CD1  | ILE D 44 | 7230    | 12090  | 6090   | 760  | -30   | 1080 | C0 |
| ATOM 10254  | H    | ILE D 44 | -17.206 | 6.961  | 43.903 | 1.00 | 61.15 |      | H0 |
| ANISOU10254 | H    | ILE D 44 | 6640    | 10750  | 5850   | 520  | 100   | 780  | H0 |
| ATOM 10255  | HA   | ILE D 44 | -14.801 | 5.774  | 44.323 | 1.00 | 63.59 |      | H0 |
| ANISOU10255 | HA   | ILE D 44 | 6760    | 11290  | 6110   | 810  | -30   | 1020 | H0 |
| ATOM 10256  | HB   | ILE D 44 | -17.444 | 4.838  | 44.495 | 1.00 | 63.25 |      | H0 |
| ANISOU10256 | HB   | ILE D 44 | 7010    | 10940  | 6090   | 710  | 180   | 1220 | H0 |
| ATOM 10257  | HG12 | ILE D 44 | -16.844 | 4.185  | 46.662 | 1.00 | 67.72 |      | H0 |
| ANISOU10257 | HG12 | ILE D 44 | 7470    | 11970  | 6290   | 920  | 80    | 1500 | H0 |
| ATOM 10258  | HG13 | ILE D 44 | -15.338 | 4.595  | 46.394 | 1.00 | 68.11 |      | H0 |

|             |               |         |       |        |      |       |      |    |
|-------------|---------------|---------|-------|--------|------|-------|------|----|
| ANISOU10258 | HG13 ILE D 44 | 7370    | 12150 | 6360   | 990  | -40   | 1390 | H0 |
| ATOM 10259  | HG21 ILE D 44 | -16.626 | 3.033 | 43.403 | 1.00 | 63.94 |      | H0 |
| ANISOU10259 | HG21 ILE D 44 | 7190    | 10670 | 6430   | 890  | 250   | 1470 | H0 |
| ATOM 10260  | HG22 ILE D 44 | -16.580 | 2.605 | 44.930 | 1.00 | 66.39 |      | H0 |
| ANISOU10260 | HG22 ILE D 44 | 7460    | 11260 | 6500   | 1000 | 200   | 1680 | H0 |
| ATOM 10261  | HG23 ILE D 44 | -15.251 | 3.070 | 44.199 | 1.00 | 65.95 |      | H0 |
| ANISOU10261 | HG23 ILE D 44 | 7280    | 11240 | 6540   | 1050 | 130   | 1530 | H0 |
| ATOM 10262  | HD11 ILE D 44 | -15.832 | 6.812 | 46.460 | 1.00 | 66.58 |      | H0 |
| ANISOU10262 | HD11 ILE D 44 | 7110    | 12110 | 6080   | 730  | -100  | 930  | H0 |
| ATOM 10263  | HD12 ILE D 44 | -16.619 | 6.183 | 47.687 | 1.00 | 68.25 |      | H0 |
| ANISOU10263 | HD12 ILE D 44 | 7380    | 12480 | 6080   | 810  | -70   | 1140 | H0 |
| ATOM 10264  | HD13 ILE D 44 | -17.392 | 6.536 | 46.346 | 1.00 | 65.47 |      | H0 |
| ANISOU10264 | HD13 ILE D 44 | 7130    | 11770 | 5980   | 660  | 30    | 1000 | H0 |
| ATOM 10265  | N THR D 45    | -16.267 | 5.243 | 41.489 | 1.00 | 57.41 |      | N0 |
| ANISOU10265 | N THR D 45    | 6280    | 9730  | 5810   | 630  | 210   | 940  | N0 |
| ATOM 10266  | CA THR D 45   | -16.125 | 4.702 | 40.106 | 1.00 | 55.81 |      | C0 |
| ANISOU10266 | CA THR D 45   | 6160    | 9230  | 5820   | 630  | 280   | 940  | C0 |
| ATOM 10267  | C THR D 45    | -15.536 | 5.757 | 39.160 | 1.00 | 54.07 |      | C0 |
| ANISOU10267 | C THR D 45    | 5860    | 9000  | 5690   | 540  | 260   | 710  | C0 |
| ATOM 10268  | O THR D 45    | -15.149 | 5.372 | 38.037 | 1.00 | 52.92 |      | O0 |
| ANISOU10268 | O THR D 45    | 5760    | 8660  | 5690   | 560  | 310   | 700  | O0 |
| ATOM 10269  | CB THR D 45   | -17.454 | 4.180 | 39.537 | 1.00 | 54.76 |      | C0 |
| ANISOU10269 | CB THR D 45   | 6190    | 8830  | 5780   | 540  | 390   | 980  | C0 |
| ATOM 10270  | OG1 THR D 45  | -18.319 | 5.282 | 39.268 | 1.00 | 53.26 |      | O0 |
| ANISOU10270 | OG1 THR D 45  | 6010    | 8640  | 5590   | 370  | 390   | 800  | O0 |
| ATOM 10271  | CG2 THR D 45  | -18.151 | 3.203 | 40.457 | 1.00 | 56.35 |      | C0 |
| ANISOU10271 | CG2 THR D 45  | 6470    | 9030  | 5910   | 590  | 420   | 1210 | C0 |
| ATOM 10272  | H THR D 45    | -17.071 | 5.649 | 41.624 | 1.00 | 56.75 |      | H0 |
| ANISOU10272 | H THR D 45    | 6230    | 9640  | 5690   | 540  | 230   | 880  | H0 |
| ATOM 10273  | HA THR D 45   | -15.496 | 3.945 | 40.147 | 1.00 | 56.97 |      | H0 |
| ANISOU10273 | HA THR D 45   | 6290    | 9370  | 5990   | 760  | 290   | 1060 | H0 |
| ATOM 10274  | HB THR D 45   | -17.258 | 3.720 | 38.686 | 1.00 | 54.48 |      | H0 |
| ANISOU10274 | HB THR D 45   | 6220    | 8610  | 5880   | 550  | 430   | 990  | H0 |
| ATOM 10275  | HG21 THR D 45 | -17.534 | 2.491 | 40.704 | 1.00 | 57.61 |      | H0 |
| ANISOU10275 | HG21 THR D 45 | 6630    | 9200  | 6060   | 710  | 420   | 1340 | H0 |
| ATOM 10276  | HG22 THR D 45 | -18.922 | 2.820 | 40.001 | 1.00 | 55.77 |      | H0 |
| ANISOU10276 | HG22 THR D 45 | 6500    | 8770  | 5910   | 520  | 490   | 1240 | H0 |
| ATOM 10277  | HG23 THR D 45 | -18.448 | 3.667 | 41.260 | 1.00 | 56.60 |      | H0 |
| ANISOU10277 | HG23 THR D 45 | 6460    | 9240  | 5810   | 560  | 390   | 1200 | H0 |
| ATOM 10278  | N ASN D 46    | -15.470 | 7.026 | 39.582 | 1.00 | 53.55 |      | N0 |
| ANISOU10278 | N ASN D 46    | 5700    | 9120  | 5530   | 440  | 190   | 540  | N0 |
| ATOM 10279  | CA ASN D 46   | -15.005 | 8.165 | 38.743 | 1.00 | 52.27 |      | C0 |
| ANISOU10279 | CA ASN D 46   | 5480    | 8930  | 5450   | 320  | 170   | 320  | C0 |
| ATOM 10280  | C ASN D 46    | -15.849 | 8.205 | 37.463 | 1.00 | 50.59 |      | C0 |
| ANISOU10280 | C ASN D 46    | 5410    | 8420  | 5390   | 220  | 260   | 270  | C0 |
| ATOM 10281  | O ASN D 46    | -15.281 | 8.101 | 36.352 | 1.00 | 49.70 |      | O0 |
| ANISOU10281 | O ASN D 46    | 5300    | 8180  | 5410   | 220  | 300   | 230  | O0 |
| ATOM 10282  | CB ASN D 46   | -13.505 | 8.081 | 38.446 | 1.00 | 53.38 |      | C0 |
| ANISOU10282 | CB ASN D 46   | 5480    | 9180  | 5620   | 390  | 120   | 320  | C0 |
| ATOM 10283  | CG ASN D 46   | -12.647 | 8.824 | 39.450 | 1.00 | 54.73 |      | C0 |
| ANISOU10283 | CG ASN D 46   | 5480    | 9670  | 5650   | 380  | 0     | 250  | C0 |
| ATOM 10284  | OD1 ASN D 46  | -12.950 | 9.958 | 39.823 | 1.00 | 54.10 |      | O0 |
| ANISOU10284 | OD1 ASN D 46  | 5380    | 9670  | 5500   | 250  | -50   | 80   | O0 |
| ATOM 10285  | ND2 ASN D 46  | -11.554 | 8.206 | 39.866 | 1.00 | 56.26 |      | N0 |

|             |       |      |     |    |      |         |        |        |      |       |    |
|-------------|-------|------|-----|----|------|---------|--------|--------|------|-------|----|
| ANISOU10285 | ND2   | ASN  | D   | 46 | 5540 | 10050   | 5790   | 530    | -50  | 370   | N0 |
| ATOM        | 10286 | H    | ASN | D  | 46   | -15.712 | 7.275  | 40.423 | 1.00 | 54.15 | H0 |
| ANISOU10286 | H     | ASN  | D   | 46 | 5750 | 9340    | 5480   | 430    | 150  | 540   | H0 |
| ATOM        | 10287 | HA   | ASN | D  | 46   | -15.166 | 8.998  | 39.244 | 1.00 | 52.38 | H0 |
| ANISOU10287 | HA    | ASN  | D   | 46 | 5460 | 9060    | 5380   | 250    | 120  | 220   | H0 |
| ATOM        | 10288 | HB2  | ASN | D  | 46   | -13.240 | 7.140  | 38.439 | 1.00 | 54.05 | H0 |
| ANISOU10288 | HB2   | ASN  | D   | 46 | 5580 | 9230    | 5730   | 520    | 150  | 460   | H0 |
| ATOM        | 10289 | HB3  | ASN | D  | 46   | -13.334 | 8.447  | 37.556 | 1.00 | 52.43 | H0 |
| ANISOU10289 | HB3   | ASN  | D   | 46 | 5370 | 8950    | 5610   | 330    | 150  | 230   | H0 |
| ATOM        | 10290 | HD21 | ASN | D  | 46   | -11.164 | 8.457  | 40.619 | 1.00 | 57.50 | H0 |
| ANISOU10290 | HD21  | ASN  | D   | 46 | 5600 | 10410   | 5840   | 540    | -130 | 350   | H0 |
| ATOM        | 10291 | HD22 | ASN | D  | 46   | -11.211 | 7.543  | 39.392 | 1.00 | 56.54 | H0 |
| ANISOU10291 | HD22  | ASN  | D   | 46 | 5580 | 10000   | 5910   | 620    | -10  | 450   | H0 |
| ATOM        | 10292 | N    | GLU | D  | 47   | -17.167 | 8.308  | 37.634 | 1.00 | 50.17 | N0 |
| ANISOU10292 | N     | GLU  | D   | 47 | 5450 | 8290    | 5310   | 150    | 300  | 270   | N0 |
| ATOM        | 10293 | CA   | GLU | D  | 47   | -18.155 | 8.460  | 36.537 | 1.00 | 49.24 | C0 |
| ANISOU10293 | CA    | GLU  | D   | 47 | 5450 | 7940    | 5320   | 50     | 370  | 210   | C0 |
| ATOM        | 10294 | C    | GLU | D  | 47   | -19.037 | 9.668  | 36.860 | 1.00 | 48.51 | C0 |
| ANISOU10294 | C     | GLU  | D   | 47 | 5360 | 7910    | 5160   | -50    | 350  | 70    | C0 |
| ATOM        | 10295 | O    | GLU | D  | 47   | -19.369 | 9.858  | 38.052 | 1.00 | 48.79 | O0 |
| ANISOU10295 | O     | GLU  | D   | 47 | 5360 | 8120    | 5060   | -30    | 320  | 80    | O0 |
| ATOM        | 10296 | CB   | GLU | D  | 47   | -18.992 | 7.189  | 36.379 | 1.00 | 49.91 | C0 |
| ANISOU10296 | CB    | GLU  | D   | 47 | 5660 | 7860    | 5450   | 80     | 440  | 370   | C0 |
| ATOM        | 10297 | CG   | GLU | D  | 47   | -18.167 | 5.940  | 36.123 | 1.00 | 51.46 | C0 |
| ANISOU10297 | CG    | GLU  | D   | 47 | 5880 | 7970    | 5710   | 210    | 470  | 510   | C0 |
| ATOM        | 10298 | CD   | GLU | D  | 47   | -18.959 | 4.652  | 35.959 | 1.00 | 52.55 | C0 |
| ANISOU10298 | CD    | GLU  | D   | 47 | 6160 | 7910    | 5900   | 220    | 540  | 670   | C0 |
| ATOM        | 10299 | OE1  | GLU | D  | 47   | -20.201 | 4.722  | 35.838 | 1.00 | 53.05 | O0 |
| ANISOU10299 | OE1   | GLU  | D   | 47 | 6290 | 7890    | 5980   | 100    | 570  | 660   | O0 |
| ATOM        | 10300 | OE2  | GLU | D  | 47   | -18.329 | 3.577  | 35.937 | 1.00 | 54.52 | O0 |
| ANISOU10300 | OE2   | GLU  | D   | 47 | 6450 | 8070    | 6200   | 340    | 560  | 800   | O0 |
| ATOM        | 10301 | H    | GLU | D  | 47   | -17.550 | 8.290  | 38.461 | 1.00 | 50.81 | H0 |
| ANISOU10301 | H     | GLU  | D   | 47 | 5530 | 8480    | 5300   | 170    | 280  | 310   | H0 |
| ATOM        | 10302 | HA   | GLU | D  | 47   | -17.671 | 8.632  | 35.701 | 1.00 | 48.69 | H0 |
| ANISOU10302 | HA    | GLU  | D   | 47 | 5380 | 7790    | 5330   | 30     | 380  | 150   | H0 |
| ATOM        | 10303 | HB2  | GLU | D  | 47   | -19.520 | 7.060  | 37.194 | 1.00 | 50.44 | H0 |
| ANISOU10303 | HB2   | GLU  | D   | 47 | 5720 | 8010    | 5430   | 90     | 440  | 430   | H0 |
| ATOM        | 10304 | HB3  | GLU | D  | 47   | -19.615 | 7.317  | 35.633 | 1.00 | 48.94 | H0 |
| ANISOU10304 | HB3   | GLU  | D   | 47 | 5600 | 7600    | 5400   | 0      | 480  | 320   | H0 |
| ATOM        | 10305 | HG2  | GLU | D  | 47   | -17.636 | 6.077  | 35.309 | 1.00 | 51.03 | H0 |
| ANISOU10305 | HG2   | GLU  | D   | 47 | 5820 | 7840    | 5730   | 200    | 480  | 440   | H0 |
| ATOM        | 10306 | HG3  | GLU | D  | 47   | -17.538 | 5.820  | 36.864 | 1.00 | 52.54 | H0 |
| ANISOU10306 | HG3   | GLU  | D   | 47 | 5940 | 8250    | 5770   | 290    | 420  | 570   | H0 |
| ATOM        | 10307 | N    | VAL | D  | 48   | -19.373 | 10.454 | 35.839 | 1.00 | 47.22 | N0 |
| ANISOU10307 | N     | VAL  | D   | 48 | 5240 | 7610    | 5100   | -150   | 380  | -60   | N0 |
| ATOM        | 10308 | CA   | VAL | D  | 48   | -20.344 | 11.584 | 35.918 | 1.00 | 47.20 | C0 |
| ANISOU10308 | CA    | VAL  | D   | 48 | 5260 | 7610    | 5070   | -230   | 380  | -190  | C0 |
| ATOM        | 10309 | C    | VAL | D  | 48   | -21.416 | 11.378 | 34.844 | 1.00 | 46.52 | C0 |
| ANISOU10309 | C     | VAL  | D   | 48 | 5270 | 7320    | 5080   | -280   | 440  | -170  | C0 |
| ATOM        | 10310 | O    | VAL | D  | 48   | -21.106 | 10.772 | 33.802 | 1.00 | 45.93 | O0 |
| ANISOU10310 | O     | VAL  | D   | 48 | 5240 | 7100    | 5110   | -290   | 470  | -130  | O0 |
| ATOM        | 10311 | CB   | VAL | D  | 48   | -19.658 | 12.955 | 35.764 | 1.00 | 46.96 | C0 |
| ANISOU10311 | CB    | VAL  | D   | 48 | 5190 | 7610    | 5050   | -290   | 330  | -370  | C0 |
| ATOM        | 10312 | CG1  | VAL | D  | 48   | -18.579 | 13.159 | 36.809 | 1.00 | 49.06 | C0 |

|             |               |         |        |        |      |       |      |    |
|-------------|---------------|---------|--------|--------|------|-------|------|----|
| ANISOU10312 | CG1 VAL D 48  | 5340    | 8090   | 5200   | -260 | 260   | -400 | C0 |
| ATOM 10313  | CG2 VAL D 48  | -19.092 | 13.163 | 34.370 | 1.00 | 46.45 |      | C0 |
| ANISOU10313 | CG2 VAL D 48  | 5140    | 7390   | 5120   | -350 | 360   | -410 | C0 |
| ATOM 10314  | H VAL D 48    | -19.022 | 10.343 | 35.006 | 1.00 | 46.91 |      | H0 |
| ANISOU10314 | H VAL D 48    | 5220    | 7460   | 5140   | -160 | 400   | -70  | H0 |
| ATOM 10315  | HA VAL D 48   | -20.775 | 11.554 | 36.789 | 1.00 | 47.73 |      | H0 |
| ANISOU10315 | HA VAL D 48   | 5320    | 7780   | 5040   | -210 | 370   | -160 | H0 |
| ATOM 10316  | HB VAL D 48   | -20.350 | 13.646 | 35.911 | 1.00 | 46.98 |      | H0 |
| ANISOU10316 | HB VAL D 48   | 5220    | 7610   | 5030   | -330 | 340   | -440 | H0 |
| ATOM 10317  | HG11 VAL D 48 | -18.944 | 12.982 | 37.693 | 1.00 | 49.49 |      | H0 |
| ANISOU10317 | HG11 VAL D 48 | 5390    | 8260   | 5150   | -220 | 240   | -370 | H0 |
| ATOM 10318  | HG12 VAL D 48 | -18.258 | 14.077 | 36.769 | 1.00 | 48.96 |      | H0 |
| ANISOU10318 | HG12 VAL D 48 | 5310    | 8100   | 5190   | -320 | 230   | -530 | H0 |
| ATOM 10319  | HG13 VAL D 48 | -17.839 | 12.551 | 36.636 | 1.00 | 49.15 |      | H0 |
| ANISOU10319 | HG13 VAL D 48 | 5310    | 8120   | 5240   | -220 | 250   | -330 | H0 |
| ATOM 10320  | HG21 VAL D 48 | -18.493 | 12.429 | 34.149 | 1.00 | 46.55 |      | H0 |
| ANISOU10320 | HG21 VAL D 48 | 5130    | 7390   | 5160   | -300 | 360   | -340 | H0 |
| ATOM 10321  | HG22 VAL D 48 | -18.600 | 14.001 | 34.344 | 1.00 | 46.54 |      | H0 |
| ANISOU10321 | HG22 VAL D 48 | 5120    | 7430   | 5140   | -400 | 330   | -510 | H0 |
| ATOM 10322  | HG23 VAL D 48 | -19.818 | 13.195 | 33.723 | 1.00 | 45.55 |      | H0 |
| ANISOU10322 | HG23 VAL D 48 | 5090    | 7150   | 5060   | -370 | 400   | -410 | H0 |
| ATOM 10323  | N ASP D 49    | -22.623 | 11.878 | 35.116 | 1.00 | 47.06 |      | N0 |
| ANISOU10323 | N ASP D 49    | 5360    | 7410   | 5110   | -320 | 460   | -200 | N0 |
| ATOM 10324  | CA ASP D 49   | -23.793 | 11.899 | 34.203 | 1.00 | 46.90 |      | C0 |
| ANISOU10324 | CA ASP D 49   | 5400    | 7250   | 5170   | -370 | 510   | -190 | C0 |
| ATOM 10325  | C ASP D 49    | -24.148 | 13.371 | 33.990 | 1.00 | 46.43 |      | C0 |
| ANISOU10325 | C ASP D 49    | 5340    | 7190   | 5110   | -400 | 500   | -340 | C0 |
| ATOM 10326  | O ASP D 49    | -24.525 | 14.032 | 34.984 | 1.00 | 46.92 |      | O0 |
| ANISOU10326 | O ASP D 49    | 5370    | 7380   | 5080   | -370 | 490   | -400 | O0 |
| ATOM 10327  | CB ASP D 49   | -24.944 | 11.094 | 34.810 | 1.00 | 48.93 |      | C0 |
| ANISOU10327 | CB ASP D 49   | 5660    | 7560   | 5370   | -370 | 550   | -70  | C0 |
| ATOM 10328  | CG ASP D 49   | -25.975 | 10.577 | 33.824 | 1.00 | 49.56 |      | C0 |
| ANISOU10328 | CG ASP D 49   | 5790    | 7500   | 5540   | -440 | 590   | -10  | C0 |
| ATOM 10329  | OD1 ASP D 49  | -26.164 | 11.223 | 32.769 | 1.00 | 51.02 |      | O0 |
| ANISOU10329 | OD1 ASP D 49  | 6000    | 7590   | 5800   | -490 | 580   | -100 | O0 |
| ATOM 10330  | OD2 ASP D 49  | -26.603 | 9.541  | 34.134 | 1.00 | 50.77 |      | O0 |
| ANISOU10330 | OD2 ASP D 49  | 5950    | 7650   | 5680   | -470 | 620   | 120  | O0 |
| ATOM 10331  | H ASP D 49    | -22.808 | 12.256 | 35.924 | 1.00 | 47.58 |      | H0 |
| ANISOU10331 | H ASP D 49    | 5390    | 7590   | 5090   | -300 | 450   | -220 | H0 |
| ATOM 10332  | HA ASP D 49   | -23.535 | 11.497 | 33.340 | 1.00 | 46.57 |      | H0 |
| ANISOU10332 | HA ASP D 49   | 5390    | 7090   | 5210   | -400 | 520   | -170 | H0 |
| ATOM 10333  | HB2 ASP D 49  | -24.574 | 10.328 | 35.289 | 1.00 | 49.47 |      | H0 |
| ANISOU10333 | HB2 ASP D 49  | 5720    | 7660   | 5410   | -340 | 550   | 30   | H0 |
| ATOM 10334  | HB3 ASP D 49  | -25.413 | 11.655 | 35.459 | 1.00 | 49.17 |      | H0 |
| ANISOU10334 | HB3 ASP D 49  | 5660    | 7690   | 5330   | -360 | 550   | -100 | H0 |
| ATOM 10335  | N VAL D 50    | -23.974 | 13.884 | 32.770 | 1.00 | 44.28 |      | N0 |
| ANISOU10335 | N VAL D 50    | 5110    | 6780   | 4940   | -450 | 500   | -410 | N0 |
| ATOM 10336  | CA VAL D 50   | -24.122 | 15.337 | 32.472 | 1.00 | 43.73 |      | C0 |
| ANISOU10336 | CA VAL D 50   | 5050    | 6670   | 4900   | -470 | 500   | -540 | C0 |
| ATOM 10337  | C VAL D 50    | -25.123 | 15.524 | 31.328 | 1.00 | 42.53 |      | C0 |
| ANISOU10337 | C VAL D 50    | 4950    | 6390   | 4810   | -500 | 520   | -520 | C0 |
| ATOM 10338  | O VAL D 50    | -25.258 | 14.606 | 30.492 | 1.00 | 41.81 |      | O0 |
| ANISOU10338 | O VAL D 50    | 4890    | 6230   | 4770   | -530 | 540   | -440 | O0 |
| ATOM 10339  | CB VAL D 50   | -22.763 | 15.996 | 32.160 | 1.00 | 44.40 |      | C0 |

|             |      |          |         |        |        |      |       |      |    |
|-------------|------|----------|---------|--------|--------|------|-------|------|----|
| ANISOU10339 | CB   | VAL D 50 | 5130    | 6720   | 5020   | -510 | 470   | -630 | C0 |
| ATOM 10340  | CG1  | VAL D 50 | -21.888 | 16.077 | 33.403 | 1.00 | 46.34 |      | C0 |
| ANISOU10340 | CG1  | VAL D 50 | 5310    | 7120   | 5180   | -490 | 420   | -670 | C0 |
| ATOM 10341  | CG2  | VAL D 50 | -22.015 | 15.303 | 31.032 | 1.00 | 44.20 |      | C0 |
| ANISOU10341 | CG2  | VAL D 50 | 5120    | 6590   | 5080   | -540 | 480   | -570 | C0 |
| ATOM 10342  | H    | VAL D 50 | -23.764 | 13.376 | 32.044 | 1.00 | 44.12 |      | H0 |
| ANISOU10342 | H    | VAL D 50 | 5110    | 6670   | 4980   | -470 | 510   | -370 | H0 |
| ATOM 10343  | HA   | VAL D 50 | -24.490 | 15.770 | 33.262 | 1.00 | 44.34 |      | H0 |
| ANISOU10343 | HA   | VAL D 50 | 5110    | 6830   | 4910   | -440 | 490   | -580 | H0 |
| ATOM 10344  | HB   | VAL D 50 | -22.949 | 16.922 | 31.868 | 1.00 | 44.50 |      | H0 |
| ANISOU10344 | HB   | VAL D 50 | 5170    | 6670   | 5060   | -530 | 470   | -710 | H0 |
| ATOM 10345  | HG11 | VAL D 50 | -22.400 | 16.458 | 34.137 | 1.00 | 46.50 |      | H0 |
| ANISOU10345 | HG11 | VAL D 50 | 5330    | 7210   | 5130   | -470 | 410   | -720 | H0 |
| ATOM 10346  | HG12 | VAL D 50 | -21.115 | 16.639 | 33.221 | 1.00 | 46.28 |      | H0 |
| ANISOU10346 | HG12 | VAL D 50 | 5290    | 7100   | 5200   | -530 | 400   | -750 | H0 |
| ATOM 10347  | HG13 | VAL D 50 | -21.588 | 15.184 | 33.648 | 1.00 | 46.19 |      | H0 |
| ANISOU10347 | HG13 | VAL D 50 | 5260    | 7160   | 5130   | -460 | 420   | -590 | H0 |
| ATOM 10348  | HG21 | VAL D 50 | -21.744 | 14.414 | 31.319 | 1.00 | 44.27 |      | H0 |
| ANISOU10348 | HG21 | VAL D 50 | 5100    | 6650   | 5070   | -500 | 480   | -500 | H0 |
| ATOM 10349  | HG22 | VAL D 50 | -21.225 | 15.822 | 30.799 | 1.00 | 44.25 |      | H0 |
| ANISOU10349 | HG22 | VAL D 50 | 5110    | 6590   | 5120   | -570 | 470   | -630 | H0 |
| ATOM 10350  | HG23 | VAL D 50 | -22.593 | 15.228 | 30.253 | 1.00 | 43.55 |      | H0 |
| ANISOU10350 | HG23 | VAL D 50 | 5080    | 6420   | 5040   | -550 | 510   | -550 | H0 |
| ATOM 10351  | N    | VAL D 51 | -25.804 | 16.672 | 31.318 | 1.00 | 41.75 |      | N0 |
| ANISOU10351 | N    | VAL D 51 | 4870    | 6280   | 4710   | -480 | 530   | -600 | N0 |
| ATOM 10352  | CA   | VAL D 51 | -26.591 | 17.177 | 30.156 | 1.00 | 41.12 |      | C0 |
| ANISOU10352 | CA   | VAL D 51 | 4830    | 6090   | 4700   | -490 | 550   | -600 | C0 |
| ATOM 10353  | C    | VAL D 51 | -25.893 | 18.444 | 29.648 | 1.00 | 41.10 |      | C0 |
| ANISOU10353 | C    | VAL D 51 | 4880    | 5980   | 4750   | -510 | 540   | -700 | C0 |
| ATOM 10354  | O    | VAL D 51 | -25.643 | 19.356 | 30.464 | 1.00 | 41.36 |      | O0 |
| ANISOU10354 | O    | VAL D 51 | 4920    | 6030   | 4760   | -490 | 530   | -800 | O0 |
| ATOM 10355  | CB   | VAL D 51 | -28.063 | 17.439 | 30.521 | 1.00 | 41.04 |      | C0 |
| ANISOU10355 | CB   | VAL D 51 | 4790    | 6150   | 4650   | -430 | 570   | -580 | C0 |
| ATOM 10356  | CG1  | VAL D 51 | -28.855 | 17.935 | 29.322 | 1.00 | 40.63 |      | C0 |
| ANISOU10356 | CG1  | VAL D 51 | 4770    | 6010   | 4660   | -430 | 570   | -560 | C0 |
| ATOM 10357  | CG2  | VAL D 51 | -28.723 | 16.206 | 31.119 | 1.00 | 41.68 |      | C0 |
| ANISOU10357 | CG2  | VAL D 51 | 4810    | 6350   | 4670   | -440 | 580   | -470 | C0 |
| ATOM 10358  | H    | VAL D 51 | -25.829 | 17.229 | 32.038 | 1.00 | 42.46 |      | H0 |
| ANISOU10358 | H    | VAL D 51 | 4950    | 6430   | 4760   | -450 | 520   | -660 | H0 |
| ATOM 10359  | HA   | VAL D 51 | -26.564 | 16.507 | 29.455 | 1.00 | 40.59 |      | H0 |
| ANISOU10359 | HA   | VAL D 51 | 4780    | 5980   | 4670   | -530 | 550   | -540 | H0 |
| ATOM 10360  | HB   | VAL D 51 | -28.076 | 18.151 | 31.208 | 1.00 | 41.75 |      | H0 |
| ANISOU10360 | HB   | VAL D 51 | 4880    | 6280   | 4700   | -390 | 570   | -650 | H0 |
| ATOM 10361  | HG11 | VAL D 51 | -28.614 | 18.858 | 29.131 | 1.00 | 40.88 |      | H0 |
| ANISOU10361 | HG11 | VAL D 51 | 4840    | 5980   | 4710   | -410 | 570   | -620 | H0 |
| ATOM 10362  | HG12 | VAL D 51 | -29.807 | 17.885 | 29.517 | 1.00 | 41.03 |      | H0 |
| ANISOU10362 | HG12 | VAL D 51 | 4780    | 6130   | 4680   | -400 | 580   | -520 | H0 |
| ATOM 10363  | HG13 | VAL D 51 | -28.654 | 17.382 | 28.548 | 1.00 | 40.20 |      | H0 |
| ANISOU10363 | HG13 | VAL D 51 | 4730    | 5910   | 4640   | -480 | 560   | -510 | H0 |
| ATOM 10364  | HG21 | VAL D 51 | -28.655 | 15.464 | 30.494 | 1.00 | 41.13 |      | H0 |
| ANISOU10364 | HG21 | VAL D 51 | 4760    | 6230   | 4640   | -490 | 580   | -410 | H0 |
| ATOM 10365  | HG22 | VAL D 51 | -29.662 | 16.393 | 31.297 | 1.00 | 41.91 |      | H0 |
| ANISOU10365 | HG22 | VAL D 51 | 4810    | 6440   | 4680   | -410 | 600   | -450 | H0 |
| ATOM 10366  | HG23 | VAL D 51 | -28.278 | 15.969 | 31.951 | 1.00 | 41.86 |      | H0 |

|             |       |     |     |    |      |         |        |        |      |       |    |
|-------------|-------|-----|-----|----|------|---------|--------|--------|------|-------|----|
| ANISOU10366 | HG23  | VAL | D   | 51 | 4820 | 6440    | 4650   | -430   | 580  | -470  | H0 |
| ATOM        | 10367 | N   | PHE | D  | 52   | -25.565 | 18.482 | 28.355 | 1.00 | 40.28 | N0 |
| ANISOU10367 | N     | PHE | D   | 52 | 4820 | 5760    | 4720   | -560   | 540  | -670  | N0 |
| ATOM        | 10368 | CA  | PHE | D  | 52   | -24.830 | 19.601 | 27.715 | 1.00 | 40.70 | C0 |
| ANISOU10368 | CA    | PHE | D   | 52 | 4930 | 5700    | 4840   | -600   | 550  | -730  | C0 |
| ATOM        | 10369 | C   | PHE | D  | 52   | -25.352 | 19.815 | 26.291 | 1.00 | 40.57 | C0 |
| ANISOU10369 | C     | PHE | D   | 52 | 4970 | 5580    | 4860   | -610   | 560  | -670  | C0 |
| ATOM        | 10370 | O   | PHE | D  | 52   | -25.864 | 18.858 | 25.685 | 1.00 | 40.04 | O0 |
| ANISOU10370 | O     | PHE | D   | 52 | 4890 | 5540    | 4790   | -610   | 560  | -590  | O0 |
| ATOM        | 10371 | CB  | PHE | D  | 52   | -23.323 | 19.326 | 27.738 | 1.00 | 40.85 | C0 |
| ANISOU10371 | CB    | PHE | D   | 52 | 4920 | 5720    | 4870   | -660   | 540  | -760  | C0 |
| ATOM        | 10372 | CG  | PHE | D  | 52   | -22.893 | 18.051 | 27.057 | 1.00 | 40.20 | C0 |
| ANISOU10372 | CG    | PHE | D   | 52 | 4820 | 5650    | 4800   | -680   | 550  | -670  | C0 |
| ATOM        | 10373 | CD1 | PHE | D  | 52   | -22.892 | 16.845 | 27.739 | 1.00 | 39.86 | C0 |
| ANISOU10373 | CD1   | PHE | D   | 52 | 4730 | 5700    | 4710   | -650   | 540  | -620  | C0 |
| ATOM        | 10374 | CD2 | PHE | D  | 52   | -22.481 | 18.059 | 25.733 | 1.00 | 40.25 | C0 |
| ANISOU10374 | CD2   | PHE | D   | 52 | 4870 | 5570    | 4860   | -720   | 580  | -640  | C0 |
| ATOM        | 10375 | CE1 | PHE | D  | 52   | -22.498 | 15.673 | 27.107 | 1.00 | 39.67 | C0 |
| ANISOU10375 | CE1   | PHE | D   | 52 | 4710 | 5660    | 4710   | -650   | 560  | -550  | C0 |
| ATOM        | 10376 | CE2 | PHE | D  | 52   | -22.089 | 16.887 | 25.102 | 1.00 | 39.73 | C0 |
| ANISOU10376 | CE2   | PHE | D   | 52 | 4800 | 5510    | 4790   | -730   | 600  | -590  | C0 |
| ATOM        | 10377 | CZ  | PHE | D  | 52   | -22.099 | 15.696 | 25.790 | 1.00 | 40.03 | C0 |
| ANISOU10377 | CZ    | PHE | D   | 52 | 4800 | 5610    | 4800   | -690   | 590  | -540  | C0 |
| ATOM        | 10378 | H   | PHE | D  | 52   | -25.768 | 17.815 | 27.768 | 1.00 | 39.99 | H0 |
| ANISOU10378 | H     | PHE | D   | 52 | 4790 | 5710    | 4700   | -580   | 550  | -610  | H0 |
| ATOM        | 10379 | HA  | PHE | D  | 52   | -25.005 | 20.424 | 28.234 | 1.00 | 41.31 | H0 |
| ANISOU10379 | HA    | PHE | D   | 52 | 5030 | 5760    | 4910   | -570   | 550  | -800  | H0 |
| ATOM        | 10380 | HB2 | PHE | D  | 52   | -22.867 | 20.080 | 27.309 | 1.00 | 41.10 | H0 |
| ANISOU10380 | HB2   | PHE | D   | 52 | 4990 | 5680    | 4950   | -700   | 550  | -800  | H0 |
| ATOM        | 10381 | HB3 | PHE | D  | 52   | -23.031 | 19.296 | 28.673 | 1.00 | 41.19 | H0 |
| ANISOU10381 | HB3   | PHE | D   | 52 | 4930 | 5850    | 4880   | -650   | 520  | -800  | H0 |
| ATOM        | 10382 | HD1 | PHE | D  | 52   | -23.169 | 16.820 | 28.640 | 1.00 | 40.25 | H0 |
| ANISOU10382 | HD1   | PHE | D   | 52 | 4750 | 5820    | 4720   | -620   | 530  | -630  | H0 |
| ATOM        | 10383 | HD2 | PHE | D  | 52   | -22.476 | 18.872 | 25.253 | 1.00 | 40.32 | H0 |
| ANISOU10383 | HD2   | PHE | D   | 52 | 4910 | 5510    | 4890   | -750   | 590  | -660  | H0 |
| ATOM        | 10384 | HE1 | PHE | D  | 52   | -22.506 | 14.858 | 27.583 | 1.00 | 39.88 | H0 |
| ANISOU10384 | HE1   | PHE | D   | 52 | 4720 | 5730    | 4710   | -620   | 560  | -510  | H0 |
| ATOM        | 10385 | HE2 | PHE | D  | 52   | -21.814 | 16.909 | 24.201 | 1.00 | 39.81 | H0 |
| ANISOU10385 | HE2   | PHE | D   | 52 | 4840 | 5470    | 4820   | -750   | 620  | -570  | H0 |
| ATOM        | 10386 | HZ  | PHE | D  | 52   | -21.827 | 14.899 | 25.363 | 1.00 | 39.72 | H0 |
| ANISOU10386 | HZ    | PHE | D   | 52 | 4770 | 5560    | 4770   | -680   | 610  | -510  | H0 |
| ATOM        | 10387 | N   | TRP | D  | 53   | -25.257 | 21.052 | 25.801 | 1.00 | 41.45 | N0 |
| ANISOU10387 | N     | TRP | D   | 53 | 5150 | 5580    | 5020   | -610   | 580  | -710  | N0 |
| ATOM        | 10388 | CA  | TRP | D  | 53   | -25.411 | 21.397 | 24.366 | 1.00 | 42.47 | C0 |
| ANISOU10388 | CA    | TRP | D   | 53 | 5340 | 5610    | 5190   | -630   | 590  | -640  | C0 |
| ATOM        | 10389 | C   | TRP | D  | 53   | -24.059 | 21.175 | 23.687 | 1.00 | 43.63 | C0 |
| ANISOU10389 | C     | TRP | D   | 53 | 5490 | 5720    | 5370   | -720   | 610  | -640  | C0 |
| ATOM        | 10390 | O   | TRP | D  | 53   | -23.087 | 21.832 | 24.100 | 1.00 | 44.82 | O0 |
| ANISOU10390 | O     | TRP | D   | 53 | 5650 | 5830    | 5550   | -780   | 620  | -710  | O0 |
| ATOM        | 10391 | CB  | TRP | D  | 53   | -25.886 | 22.841 | 24.175 | 1.00 | 42.91 | C0 |
| ANISOU10391 | CB    | TRP | D   | 53 | 5470 | 5550    | 5290   | -580   | 610  | -660  | C0 |
| ATOM        | 10392 | CG  | TRP | D  | 53   | -27.202 | 23.168 | 24.809 | 1.00 | 43.00 | C0 |
| ANISOU10392 | CG    | TRP | D   | 53 | 5470 | 5600    | 5270   | -460   | 600  | -670  | C0 |
| ATOM        | 10393 | CD1 | TRP | D  | 53   | -28.165 | 22.298 | 25.230 | 1.00 | 42.23 | C0 |

|             |           |    |         |        |        |      |       |      |    |
|-------------|-----------|----|---------|--------|--------|------|-------|------|----|
| ANISOU10393 | CD1 TRP D | 53 | 5290    | 5650   | 5110   | -410 | 580   | -630 | C0 |
| ATOM 10394  | CD2 TRP D | 53 | -27.721 | 24.488 | 25.050 | 1.00 | 43.99 |      | C0 |
| ANISOU10394 | CD2 TRP D | 53 | 5660    | 5630   | 5430   | -370 | 620   | -720 | C0 |
| ATOM 10395  | NE1 TRP D | 53 | -29.235 | 22.985 | 25.736 | 1.00 | 43.14 |      | N0 |
| ANISOU10395 | NE1 TRP D | 53 | 5390    | 5780   | 5210   | -290 | 590   | -650 | N0 |
| ATOM 10396  | CE2 TRP D | 53 | -28.994 | 24.330 | 25.637 | 1.00 | 43.99 |      | C0 |
| ANISOU10396 | CE2 TRP D | 53 | 5600    | 5740   | 5380   | -250 | 610   | -700 | C0 |
| ATOM 10397  | CE3 TRP D | 53 | -27.229 | 25.781 | 24.837 | 1.00 | 45.24 |      | C0 |
| ANISOU10397 | CE3 TRP D | 53 | 5930    | 5600   | 5660   | -380 | 640   | -760 | C0 |
| ATOM 10398  | CZ2 TRP D | 53 | -29.780 | 25.419 | 26.012 | 1.00 | 45.24 |      | C0 |
| ANISOU10398 | CZ2 TRP D | 53 | 5800    | 5840   | 5550   | -110 | 640   | -740 | C0 |
| ATOM 10399  | CZ3 TRP D | 53 | -28.002 | 26.858 | 25.213 | 1.00 | 46.69 |      | C0 |
| ANISOU10399 | CZ3 TRP D | 53 | 6180    | 5700   | 5860   | -260 | 660   | -800 | C0 |
| ATOM 10400  | CH2 TRP D | 53 | -29.262 | 26.676 | 25.790 | 1.00 | 46.69 |      | C0 |
| ANISOU10400 | CH2 TRP D | 53 | 6120    | 5820   | 5810   | -110 | 660   | -800 | C0 |
| ATOM 10401  | H TRP D   | 53 | -25.087 | 21.777 | 26.326 | 1.00 | 42.17 |      | H0 |
| ANISOU10401 | H TRP D   | 53 | 5260    | 5640   | 5120   | -600 | 580   | -780 | H0 |
| ATOM 10402  | HA TRP D  | 53 | -26.080 | 20.794 | 23.970 | 1.00 | 42.06 |      | H0 |
| ANISOU10402 | HA TRP D  | 53 | 5270    | 5600   | 5110   | -610 | 580   | -590 | H0 |
| ATOM 10403  | HB2 TRP D | 53 | -25.202 | 23.436 | 24.540 | 1.00 | 43.45 |      | H0 |
| ANISOU10403 | HB2 TRP D | 53 | 5560    | 5560   | 5380   | -620 | 610   | -730 | H0 |
| ATOM 10404  | HB3 TRP D | 53 | -25.947 | 23.015 | 23.214 | 1.00 | 42.99 |      | H0 |
| ANISOU10404 | HB3 TRP D | 53 | 5520    | 5500   | 5310   | -590 | 620   | -610 | H0 |
| ATOM 10405  | HD1 TRP D | 53 | -28.104 | 21.356 | 25.192 | 1.00 | 41.74 |      | H0 |
| ANISOU10405 | HD1 TRP D | 53 | 5180    | 5650   | 5030   | -450 | 570   | -600 | H0 |
| ATOM 10406  | HE1 TRP D | 53 | -29.961 | 22.619 | 26.067 | 1.00 | 43.16 |      | H0 |
| ANISOU10406 | HE1 TRP D | 53 | 5340    | 5880   | 5180   | -250 | 590   | -630 | H0 |
| ATOM 10407  | HE3 TRP D | 53 | -26.379 | 25.912 | 24.447 | 1.00 | 45.19 |      | H0 |
| ANISOU10407 | HE3 TRP D | 53 | 5960    | 5530   | 5680   | -470 | 650   | -760 | H0 |
| ATOM 10408  | HZ2 TRP D | 53 | -30.626 | 25.298 | 26.406 | 1.00 | 45.66 |      | H0 |
| ANISOU10408 | HZ2 TRP D | 53 | 5800    | 5980   | 5570   | -30  | 640   | -730 | H0 |
| ATOM 10409  | HZ3 TRP D | 53 | -27.680 | 27.735 | 25.071 | 1.00 | 47.47 |      | H0 |
| ANISOU10409 | HZ3 TRP D | 53 | 6370    | 5650   | 6020   | -270 | 680   | -830 | H0 |
| ATOM 10410  | HH2 TRP D | 53 | -29.766 | 27.429 | 26.036 | 1.00 | 47.70 |      | H0 |
| ANISOU10410 | HH2 TRP D | 53 | 6290    | 5880   | 5950   | -10  | 680   | -830 | H0 |
| ATOM 10411  | N GLN D   | 54 | -23.992 | 20.252 | 22.728 | 1.00 | 44.38 |      | N0 |
| ANISOU10411 | N GLN D   | 54 | 5590    | 5830   | 5440   | -740 | 620   | -570 | N0 |
| ATOM 10412  | CA GLN D  | 54 | -22.777 | 20.022 | 21.902 | 1.00 | 45.39 |      | C0 |
| ANISOU10412 | CA GLN D  | 54 | 5720    | 5930   | 5590   | -810 | 660   | -560 | C0 |
| ATOM 10413  | C GLN D   | 54 | -22.882 | 20.952 | 20.687 | 1.00 | 45.84 |      | C0 |
| ANISOU10413 | C GLN D   | 54 | 5860    | 5890   | 5660   | -840 | 690   | -510 | C0 |
| ATOM 10414  | O GLN D   | 54 | -23.321 | 20.492 | 19.617 | 1.00 | 45.53 |      | O0 |
| ANISOU10414 | O GLN D   | 54 | 5850    | 5860   | 5580   | -830 | 690   | -450 | O0 |
| ATOM 10415  | CB GLN D  | 54 | -22.637 | 18.534 | 21.568 | 1.00 | 45.03 |      | C0 |
| ANISOU10415 | CB GLN D  | 54 | 5650    | 5950   | 5510   | -810 | 670   | -530 | C0 |
| ATOM 10416  | CG GLN D  | 54 | -21.235 | 18.145 | 21.119 | 1.00 | 46.01 |      | C0 |
| ANISOU10416 | CG GLN D  | 54 | 5750    | 6090   | 5650   | -850 | 710   | -530 | C0 |
| ATOM 10417  | CD GLN D  | 54 | -21.034 | 16.650 | 21.059 | 1.00 | 46.77 |      | C0 |
| ANISOU10417 | CD GLN D  | 54 | 5830    | 6230   | 5720   | -820 | 720   | -520 | C0 |
| ATOM 10418  | OE1 GLN D | 54 | -20.900 | 15.973 | 22.079 | 1.00 | 46.32 |      | O0 |
| ANISOU10418 | OE1 GLN D | 54 | 5720    | 6220   | 5660   | -780 | 700   | -530 | O0 |
| ATOM 10419  | NE2 GLN D | 54 | -20.994 | 16.119 | 19.847 | 1.00 | 47.25 |      | N0 |
| ANISOU10419 | NE2 GLN D | 54 | 5940    | 6260   | 5750   | -830 | 760   | -490 | N0 |
| ATOM 10420  | H GLN D   | 54 | -24.690 | 19.705 | 22.519 | 1.00 | 44.00 |      | H0 |

|             |      |          |         |        |        |       |       |      |    |
|-------------|------|----------|---------|--------|--------|-------|-------|------|----|
| ANISOU10420 | H    | GLN D 54 | 5530    | 5820   | 5370   | -720  | 610   | -540 | H0 |
| ATOM 10421  | HA   | GLN D 54 | -21.993 | 20.294 | 22.431 | 1.00  | 45.51 |      | H0 |
| ANISOU10421 | HA   | GLN D 54 | 5710    | 5960   | 5630   | -840  | 660   | -600 | H0 |
| ATOM 10422  | HB2  | GLN D 54 | -22.875 | 18.013 | 22.363 | 1.00  | 44.93 |      | H0 |
| ANISOU10422 | HB2  | GLN D 54 | 5600    | 5990   | 5480   | -780  | 640   | -540 | H0 |
| ATOM 10423  | HB3  | GLN D 54 | -23.276 | 18.309 | 20.860 | 1.00  | 45.04 |      | H0 |
| ANISOU10423 | HB3  | GLN D 54 | 5690    | 5940   | 5480   | -800  | 660   | -490 | H0 |
| ATOM 10424  | HG2  | GLN D 54 | -21.065 | 18.526 | 20.231 | 1.00  | 46.33 |      | H0 |
| ANISOU10424 | HG2  | GLN D 54 | 5830    | 6090   | 5690   | -880  | 740   | -510 | H0 |
| ATOM 10425  | HG3  | GLN D 54 | -20.581 | 18.529 | 21.738 | 1.00  | 46.36 |      | H0 |
| ANISOU10425 | HG3  | GLN D 54 | 5750    | 6150   | 5720   | -870  | 710   | -570 | H0 |
| ATOM 10426  | HE21 | GLN D 54 | -20.446 | 15.447 | 19.676 | 1.00  | 47.27 |      | H0 |
| ANISOU10426 | HE21 | GLN D 54 | 5930    | 6280   | 5750   | -810  | 780   | -500 | H0 |
| ATOM 10427  | HE22 | GLN D 54 | -21.516 | 16.437 | 19.207 | 1.00  | 47.15 |      | H0 |
| ANISOU10427 | HE22 | GLN D 54 | 5970    | 6220   | 5720   | -840  | 750   | -480 | H0 |
| ATOM 10428  | N    | GLN D 55 | -22.539 | 22.232 | 20.871 | 1.00  | 46.89 |      | N0 |
| ANISOU10428 | N    | GLN D 55 | 6030    | 5940   | 5850   | -870  | 700   | -540 | N0 |
| ATOM 10429  | CA   | GLN D 55 | -22.747 | 23.300 | 19.855 | 1.00  | 48.82 |      | C0 |
| ANISOU10429 | CA   | GLN D 55 | 6370    | 6060   | 6120   | -870  | 730   | -470 | C0 |
| ATOM 10430  | C    | GLN D 55 | -21.697 | 23.146 | 18.753 | 1.00  | 47.97 |      | C0 |
| ANISOU10430 | C    | GLN D 55 | 6270    | 5950   | 6010   | -960  | 790   | -420 | C0 |
| ATOM 10431  | O    | GLN D 55 | -20.503 | 23.348 | 19.039 | 1.00  | 49.38 |      | O0 |
| ANISOU10431 | O    | GLN D 55 | 6400    | 6130   | 6230   | -1050 | 820   | -470 | O0 |
| ATOM 10432  | CB   | GLN D 55 | -22.687 | 24.693 | 20.483 | 1.00  | 50.94 |      | C0 |
| ANISOU10432 | CB   | GLN D 55 | 6690    | 6200   | 6460   | -880  | 740   | -530 | C0 |
| ATOM 10433  | CG   | GLN D 55 | -23.703 | 24.910 | 21.594 | 1.00  | 52.21 |      | C0 |
| ANISOU10433 | CG   | GLN D 55 | 6850    | 6370   | 6610   | -780  | 700   | -590 | C0 |
| ATOM 10434  | CD   | GLN D 55 | -23.696 | 26.331 | 22.101 | 1.00  | 54.79 |      | C0 |
| ANISOU10434 | CD   | GLN D 55 | 7270    | 6540   | 7010   | -780  | 710   | -650 | C0 |
| ATOM 10435  | OE1  | GLN D 55 | -24.679 | 27.058 | 21.978 | 1.00  | 57.41 |      | O0 |
| ANISOU10435 | OE1  | GLN D 55 | 7670    | 6790   | 7350   | -670  | 710   | -620 | O0 |
| ATOM 10436  | NE2  | GLN D 55 | -22.576 | 26.743 | 22.673 | 1.00  | 56.17 |      | N0 |
| ANISOU10436 | NE2  | GLN D 55 | 7440    | 6680   | 7230   | -890  | 720   | -750 | N0 |
| ATOM 10437  | H    | GLN D 55 | -22.144 | 22.525 | 21.638 | 1.00  | 47.34 |      | H0 |
| ANISOU10437 | H    | GLN D 55 | 6060    | 5990   | 5930   | -890  | 700   | -600 | H0 |
| ATOM 10438  | HA   | GLN D 55 | -23.638 | 23.172 | 19.460 | 1.00  | 48.44 |      | H0 |
| ANISOU10438 | HA   | GLN D 55 | 6340    | 6030   | 6040   | -810  | 710   | -430 | H0 |
| ATOM 10439  | HB2  | GLN D 55 | -21.787 | 24.838 | 20.838 | 1.00  | 51.28 |      | H0 |
| ANISOU10439 | HB2  | GLN D 55 | 6710    | 6240   | 6540   | -960  | 750   | -580 | H0 |
| ATOM 10440  | HB3  | GLN D 55 | -22.840 | 25.357 | 19.778 | 1.00  | 51.64 |      | H0 |
| ANISOU10440 | HB3  | GLN D 55 | 6850    | 6200   | 6570   | -880  | 760   | -470 | H0 |
| ATOM 10441  | HG2  | GLN D 55 | -24.600 | 24.692 | 21.260 | 1.00  | 51.94 |      | H0 |
| ANISOU10441 | HG2  | GLN D 55 | 6820    | 6370   | 6550   | -710  | 680   | -530 | H0 |
| ATOM 10442  | HG3  | GLN D 55 | -23.504 | 24.303 | 22.338 | 1.00  | 51.66 |      | H0 |
| ANISOU10442 | HG3  | GLN D 55 | 6710    | 6390   | 6520   | -790  | 680   | -640 | H0 |
| ATOM 10443  | HE21 | GLN D 55 | -22.466 | 27.600 | 22.863 | 1.00  | 56.92 |      | H0 |
| ANISOU10443 | HE21 | GLN D 55 | 7600    | 6660   | 7370   | -920  | 730   | -790 | H0 |
| ATOM 10444  | HE22 | GLN D 55 | -21.937 | 26.163 | 22.866 | 1.00  | 55.47 |      | H0 |
| ANISOU10444 | HE22 | GLN D 55 | 7280    | 6670   | 7130   | -950  | 710   | -770 | H0 |
| ATOM 10445  | N    | THR D 56 | -22.137 | 22.805 | 17.540 | 1.00  | 46.98 |      | N0 |
| ANISOU10445 | N    | THR D 56 | 6180    | 5850   | 5820   | -940  | 800   | -340 | N0 |
| ATOM 10446  | CA   | THR D 56 | -21.268 | 22.422 | 16.398 | 1.00  | 46.49 |      | C0 |
| ANISOU10446 | CA   | THR D 56 | 6130    | 5820   | 5720   | -1000 | 860   | -290 | C0 |
| ATOM 10447  | C    | THR D 56 | -21.633 | 23.277 | 15.180 | 1.00  | 46.21 |      | C0 |



|             |      |          |         |        |        |       |       |      |    |
|-------------|------|----------|---------|--------|--------|-------|-------|------|----|
| ANISOU10447 | C    | THR D 56 | 6190    | 5720   | 5650   | -990  | 890   | -180 | C0 |
| ATOM 10448  | O    | THR D 56 | -22.795 | 23.197 | 14.732 | 1.00  | 45.30 |      | O0 |
| ANISOU10448 | O    | THR D 56 | 6110    | 5620   | 5470   | -920  | 840   | -130 | O0 |
| ATOM 10449  | CB   | THR D 56 | -21.388 | 20.917 | 16.131 | 1.00  | 46.34 |      | C0 |
| ANISOU10449 | CB   | THR D 56 | 6070    | 5910   | 5630   | -960  | 850   | -310 | C0 |
| ATOM 10450  | OG1  | THR D 56 | -21.584 | 20.272 | 17.389 | 1.00  | 47.07 |      | O0 |
| ANISOU10450 | OG1  | THR D 56 | 6100    | 6040   | 5740   | -930  | 800   | -380 | O0 |
| ATOM 10451  | CG2  | THR D 56 | -20.167 | 20.332 | 15.460 | 1.00  | 47.42 |      | C0 |
| ANISOU10451 | CG2  | THR D 56 | 6180    | 6100   | 5740   | -1010 | 920   | -310 | C0 |
| ATOM 10452  | H    | THR D 56 | -23.022 | 22.783 | 17.324 | 1.00  | 46.93 |      | H0 |
| ANISOU10452 | H    | THR D 56 | 6200    | 5850   | 5780   | -880  | 770   | -300 | H0 |
| ATOM 10453  | HA   | THR D 56 | -20.339 | 22.616 | 16.648 | 1.00  | 46.83 |      | H0 |
| ANISOU10453 | HA   | THR D 56 | 6130    | 5850   | 5800   | -1060 | 890   | -320 | H0 |
| ATOM 10454  | HB   | THR D 56 | -22.178 | 20.760 | 15.560 | 1.00  | 46.62 |      | H0 |
| ANISOU10454 | HB   | THR D 56 | 6150    | 5960   | 5610   | -930  | 830   | -270 | H0 |
| ATOM 10455  | HG21 | THR D 56 | -20.027 | 20.768 | 14.601 | 1.00  | 47.82 |      | H0 |
| ANISOU10455 | HG21 | THR D 56 | 6270    | 6140   | 5760   | -1040 | 960   | -260 | H0 |
| ATOM 10456  | HG22 | THR D 56 | -20.299 | 19.377 | 15.321 | 1.00  | 46.80 |      | H0 |
| ANISOU10456 | HG22 | THR D 56 | 6090    | 6070   | 5620   | -980  | 920   | -330 | H0 |
| ATOM 10457  | HG23 | THR D 56 | -19.387 | 20.472 | 16.025 | 1.00  | 47.30 |      | H0 |
| ANISOU10457 | HG23 | THR D 56 | 6110    | 6090   | 5770   | -1040 | 940   | -340 | H0 |
| ATOM 10458  | N    | THR D 57 | -20.681 | 24.068 | 14.671 | 1.00  | 45.92 |      | N0 |
| ANISOU10458 | N    | THR D 57 | 6180    | 5620   | 5650   | -1080 | 960   | -130 | N0 |
| ATOM 10459  | CA   | THR D 57 | -20.859 | 24.914 | 13.462 | 1.00  | 46.79 |      | C0 |
| ANISOU10459 | CA   | THR D 57 | 6390    | 5660   | 5720   | -1090 | 1000  | 0    | C0 |
| ATOM 10460  | C    | THR D 57 | -19.748 | 24.603 | 12.449 | 1.00  | 46.62 |      | C0 |
| ANISOU10460 | C    | THR D 57 | 6360    | 5710   | 5650   | -1170 | 1090  | 50   | C0 |
| ATOM 10461  | O    | THR D 57 | -18.624 | 24.281 | 12.876 | 1.00  | 46.45 |      | O0 |
| ANISOU10461 | O    | THR D 57 | 6240    | 5730   | 5670   | -1250 | 1140  | -20  | O0 |
| ATOM 10462  | CB   | THR D 57 | -20.944 | 26.404 | 13.827 | 1.00  | 48.61 |      | C0 |
| ANISOU10462 | CB   | THR D 57 | 6710    | 5710   | 6060   | -1110 | 1010  | 40   | C0 |
| ATOM 10463  | OG1  | THR D 57 | -19.687 | 26.856 | 14.330 | 1.00  | 50.20 |      | O0 |
| ANISOU10463 | OG1  | THR D 57 | 6870    | 5850   | 6350   | -1250 | 1070  | -20  | O0 |
| ATOM 10464  | CG2  | THR D 57 | -22.020 | 26.696 | 14.851 | 1.00  | 48.17 |      | C0 |
| ANISOU10464 | CG2  | THR D 57 | 6660    | 5590   | 6050   | -1000 | 940   | -20  | C0 |
| ATOM 10465  | H    | THR D 57 | -19.848 | 24.145 | 15.033 | 1.00  | 46.32 |      | H0 |
| ANISOU10465 | H    | THR D 57 | 6190    | 5660   | 5750   | -1140 | 990   | -170 | H0 |
| ATOM 10466  | HA   | THR D 57 | -21.714 | 24.659 | 13.053 | 1.00  | 46.62 |      | H0 |
| ANISOU10466 | HA   | THR D 57 | 6400    | 5680   | 5640   | -1020 | 960   | 40   | H0 |
| ATOM 10467  | HB   | THR D 57 | -21.152 | 26.907 | 13.003 | 1.00  | 49.55 |      | H0 |
| ANISOU10467 | HB   | THR D 57 | 6900    | 5780   | 6150   | -1100 | 1040  | 140  | H0 |
| ATOM 10468  | HG21 | THR D 57 | -22.860 | 26.297 | 14.564 | 1.00  | 47.76 |      | H0 |
| ANISOU10468 | HG21 | THR D 57 | 6610    | 5600   | 5930   | -920  | 900   | 10   | H0 |
| ATOM 10469  | HG22 | THR D 57 | -22.133 | 27.660 | 14.938 | 1.00  | 49.14 |      | H0 |
| ANISOU10469 | HG22 | THR D 57 | 6860    | 5580   | 6230   | -1000 | 950   | 0    | H0 |
| ATOM 10470  | HG23 | THR D 57 | -21.761 | 26.322 | 15.712 | 1.00  | 47.50 |      | H0 |
| ANISOU10470 | HG23 | THR D 57 | 6510    | 5540   | 5990   | -1020 | 920   | -120 | H0 |
| ATOM 10471  | N    | TRPD 58  | -20.075 | 24.678 | 11.157 | 1.00  | 46.23 |      | N0 |
| ANISOU10471 | N    | TRPD 58  | 6380    | 5700   | 5490   | -1150 | 1120  | 160  | N0 |
| ATOM 10472  | CA   | TRPD 58  | -19.129 | 24.504 | 10.024 | 1.00  | 47.03 |      | C0 |
| ANISOU10472 | CA   | TRPD 58  | 6480    | 5880   | 5510   | -1210 | 1220  | 220  | C0 |
| ATOM 10473  | C    | TRPD 58  | -19.768 | 25.063 | 8.750  | 1.00  | 48.52 |      | C0 |
| ANISOU10473 | C    | TRPD 58  | 6790    | 6060   | 5590   | -1180 | 1230  | 380  | C0 |
| ATOM 10474  | O    | TRPD 58  | -20.957 | 25.406 | 8.793  | 1.00  | 48.23 |      | O0 |

|             |     |          |         |        |        |       |       |      |    |
|-------------|-----|----------|---------|--------|--------|-------|-------|------|----|
| ANISOU10474 | O   | TRP D 58 | 6810    | 5980   | 5540   | -1090 | 1150  | 420  | O0 |
| ATOM 10475  | CB  | TRP D 58 | -18.738 | 23.030 | 9.865  | 1.00  | 45.61 |      | C0 |
| ANISOU10475 | CB  | TRP D 58 | 6230    | 5850   | 5250   | -1190 | 1240  | 130  | C0 |
| ATOM 10476  | CG  | TRP D 58 | -19.872 | 22.162 | 9.419  | 1.00  | 44.87 |      | C0 |
| ANISOU10476 | CG  | TRP D 58 | 6180    | 5830   | 5040   | -1100 | 1160  | 110  | C0 |
| ATOM 10477  | CD1 | TRP D 58 | -20.183 | 21.819 | 8.135  | 1.00  | 45.89 |      | C0 |
| ANISOU10477 | CD1 | TRP D 58 | 6370    | 6050   | 5010   | -1070 | 1170  | 160  | C0 |
| ATOM 10478  | CD2 | TRP D 58 | -20.868 | 21.545 | 10.254 | 1.00  | 43.26 |      | C0 |
| ANISOU10478 | CD2 | TRP D 58 | 5950    | 5630   | 4860   | -1030 | 1050  | 30   | C0 |
| ATOM 10479  | NE1 | TRP D 58 | -21.301 | 21.029 | 8.116  | 1.00  | 44.92 |      | N0 |
| ANISOU10479 | NE1 | TRP D 58 | 6270    | 5980   | 4820   | -1010 | 1080  | 110  | N0 |
| ATOM 10480  | CE2 | TRP D 58 | -21.746 | 20.848 | 9.398  | 1.00  | 43.35 |      | C0 |
| ANISOU10480 | CE2 | TRP D 58 | 6010    | 5730   | 4730   | -990  | 1000  | 30   | C0 |
| ATOM 10481  | CE3 | TRP D 58 | -21.112 | 21.523 | 11.633 | 1.00  | 42.46 |      | C0 |
| ANISOU10481 | CE3 | TRP D 58 | 5790    | 5470   | 4870   | -1020 | 1000  | -50  | C0 |
| ATOM 10482  | CZ2 | TRP D 58 | -22.834 | 20.122 | 9.881  | 1.00  | 42.20 |      | C0 |
| ANISOU10482 | CZ2 | TRP D 58 | 5850    | 5610   | 4570   | -940  | 900   | -30  | C0 |
| ATOM 10483  | CZ3 | TRP D 58 | -22.188 | 20.808 | 12.107 | 1.00  | 41.37 |      | C0 |
| ANISOU10483 | CZ3 | TRP D 58 | 5640    | 5370   | 4710   | -960  | 910   | -100 | C0 |
| ATOM 10484  | CH2 | TRP D 58 | -23.038 | 20.119 | 11.240 | 1.00  | 41.15 |      | C0 |
| ANISOU10484 | CH2 | TRP D 58 | 5650    | 5420   | 4560   | -930  | 860   | -80  | C0 |
| ATOM 10485  | H   | TRP D 58 | -20.928 | 24.844 | 10.882 | 1.00  | 46.55 |      | H0 |
| ANISOU10485 | H   | TRP D 58 | 6470    | 5720   | 5490   | -1080 | 1080  | 210  | H0 |
| ATOM 10486  | HA  | TRP D 58 | -18.312 | 25.019 | 10.225 | 1.00  | 47.62 |      | H0 |
| ANISOU10486 | HA  | TRP D 58 | 6530    | 5910   | 5660   | -1300 | 1280  | 230  | H0 |
| ATOM 10487  | HB2 | TRP D 58 | -18.011 | 22.971 | 9.211  | 1.00  | 46.49 |      | H0 |
| ANISOU10487 | HB2 | TRP D 58 | 6330    | 6020   | 5320   | -1230 | 1320  | 160  | H0 |
| ATOM 10488  | HB3 | TRP D 58 | -18.399 | 22.703 | 10.723 | 1.00  | 45.03 |      | H0 |
| ANISOU10488 | HB3 | TRP D 58 | 6080    | 5780   | 5250   | -1200 | 1220  | 50   | H0 |
| ATOM 10489  | HD1 | TRP D 58 | -19.701 | 22.083 | 7.367  | 1.00  | 46.68 |      | H0 |
| ANISOU10489 | HD1 | TRP D 58 | 6500    | 6190   | 5050   | -1100 | 1240  | 220  | H0 |
| ATOM 10490  | HE1 | TRP D 58 | -21.667 | 20.695 | 7.399  | 1.00  | 45.35 |      | H0 |
| ANISOU10490 | HE1 | TRP D 58 | 6360    | 6110   | 4760   | -1000 | 1060  | 120  | H0 |
| ATOM 10491  | HE3 | TRP D 58 | -20.543 | 21.983 | 12.227 | 1.00  | 42.39 |      | H0 |
| ANISOU10491 | HE3 | TRP D 58 | 5750    | 5410   | 4950   | -1050 | 1020  | -60  | H0 |
| ATOM 10492  | HZ2 | TRP D 58 | -23.408 | 19.658 | 9.297  | 1.00  | 42.56 |      | H0 |
| ANISOU10492 | HZ2 | TRP D 58 | 5920    | 5720   | 4530   | -930  | 870   | -30  | H0 |
| ATOM 10493  | HZ3 | TRP D 58 | -22.357 | 20.784 | 13.035 | 1.00  | 40.75 |      | H0 |
| ANISOU10493 | HZ3 | TRP D 58 | 5520    | 5260   | 4700   | -940  | 870   | -140 | H0 |
| ATOM 10494  | HH2 | TRP D 58 | -23.766 | 19.639 | 11.594 | 1.00  | 40.82 |      | H0 |
| ANISOU10494 | HH2 | TRP D 58 | 5590    | 5400   | 4520   | -910  | 800   | -120 | H0 |
| ATOM 10495  | N   | SER D 59 | -18.996 | 25.153 | 7.667  | 1.00  | 51.01 |      | N0 |
| ANISOU10495 | N   | SER D 59 | 7120    | 6440   | 5820   | -1230 | 1340  | 470  | N0 |
| ATOM 10496  | CA  | SER D 59 | -19.459 | 25.609 | 6.331  | 1.00  | 53.65 |      | C0 |
| ANISOU10496 | CA  | SER D 59 | 7560    | 6810   | 6010   | -1200 | 1360  | 630  | C0 |
| ATOM 10497  | C   | SER D 59 | -19.506 | 24.420 | 5.365  | 1.00  | 53.71 |      | C0 |
| ANISOU10497 | C   | SER D 59 | 7560    | 7020   | 5820   | -1160 | 1370  | 590  | C0 |
| ATOM 10498  | O   | SER D 59 | -18.565 | 23.605 | 5.367  | 1.00  | 52.27 |      | O0 |
| ANISOU10498 | O   | SER D 59 | 7310    | 6930   | 5620   | -1200 | 1440  | 490  | O0 |
| ATOM 10499  | CB  | SER D 59 | -18.592 | 26.719 | 5.800  | 1.00  | 56.12 |      | C0 |
| ANISOU10499 | CB  | SER D 59 | 7920    | 7050   | 6360   | -1310 | 1480  | 780  | C0 |
| ATOM 10500  | OG  | SER D 59 | -18.768 | 27.900 | 6.570  | 1.00  | 57.86 |      | O0 |
| ANISOU10500 | OG  | SER D 59 | 8190    | 7050   | 6740   | -1340 | 1460  | 820  | O0 |
| ATOM 10501  | H   | SER D 59 | -18.111 | 24.937 | 7.668  | 1.00  | 51.16 |      | H0 |

|             |     |          |         |        |        |       |       |      |    |
|-------------|-----|----------|---------|--------|--------|-------|-------|------|----|
| ANISOU10501 | H   | SER D 59 | 7080    | 6500   | 5850   | -1300 | 1400  | 440  | H0 |
| ATOM 10502  | HA  | SER D 59 | -20.384 | 25.961 | 6.432  | 1.00  | 53.49 |      | H0 |
| ANISOU10502 | HA  | SER D 59 | 7590    | 6740   | 5990   | -1130 | 1280  | 670  | H0 |
| ATOM 10503  | HB2 | SER D 59 | -17.648 | 26.441 | 5.833  | 1.00  | 56.39 |      | H0 |
| ANISOU10503 | HB2 | SER D 59 | 7890    | 7130   | 6410   | -1380 | 1550  | 730  | H0 |
| ATOM 10504  | HB3 | SER D 59 | -18.827 | 26.899 | 4.862  | 1.00  | 57.32 |      | H0 |
| ANISOU10504 | HB3 | SER D 59 | 8140    | 7250   | 6390   | -1280 | 1500  | 890  | H0 |
| ATOM 10505  | N   | ASP D 60 | -20.594 | 24.329 | 4.599  | 1.00  | 55.28 |      | N0 |
| ANISOU10505 | N   | ASP D 60 | 7840    | 7290   | 5880   | -1080 | 1290  | 650  | N0 |
| ATOM 10506  | CA  | ASP D 60 | -20.765 | 23.413 | 3.443  | 1.00  | 56.95 |      | C0 |
| ANISOU10506 | CA  | ASP D 60 | 8080    | 7690   | 5870   | -1050 | 1300  | 630  | C0 |
| ATOM 10507  | C   | ASP D 60 | -21.319 | 24.255 | 2.292  | 1.00  | 59.65 |      | C0 |
| ANISOU10507 | C   | ASP D 60 | 8520    | 8080   | 6060   | -1020 | 1290  | 830  | C0 |
| ATOM 10508  | O   | ASP D 60 | -22.534 | 24.516 | 2.291  | 1.00  | 59.17 |      | O0 |
| ANISOU10508 | O   | ASP D 60 | 8490    | 8020   | 5970   | -930  | 1170  | 880  | O0 |
| ATOM 10509  | CB  | ASP D 60 | -21.669 | 22.233 | 3.813  | 1.00  | 56.12 |      | C0 |
| ANISOU10509 | CB  | ASP D 60 | 7940    | 7650   | 5720   | -1000 | 1180  | 480  | C0 |
| ATOM 10510  | CG  | ASP D 60 | -21.824 | 21.184 | 2.724  | 1.00  | 56.97 |      | C0 |
| ANISOU10510 | CG  | ASP D 60 | 8090    | 7940   | 5610   | -990  | 1170  | 410  | C0 |
| ATOM 10511  | OD1 | ASP D 60 | -21.255 | 21.373 | 1.632  | 1.00  | 57.78 |      | O0 |
| ANISOU10511 | OD1 | ASP D 60 | 8250    | 8130   | 5570   | -1000 | 1260  | 490  | O0 |
| ATOM 10512  | OD2 | ASP D 60 | -22.513 | 20.178 | 2.987  | 1.00  | 56.31 |      | O0 |
| ANISOU10512 | OD2 | ASP D 60 | 7990    | 7900   | 5500   | -970  | 1080  | 280  | O0 |
| ATOM 10513  | H   | ASP D 60 | -21.330 | 24.843 | 4.752  | 1.00  | 55.33 |      | H0 |
| ANISOU10513 | H   | ASP D 60 | 7880    | 7240   | 5910   | -1030 | 1230  | 710  | H0 |
| ATOM 10514  | HA  | ASP D 60 | -19.880 | 23.063 | 3.186  | 1.00  | 57.28 |      | H0 |
| ANISOU10514 | HA  | ASP D 60 | 8100    | 7780   | 5880   | -1100 | 1390  | 600  | H0 |
| ATOM 10515  | HB2 | ASP D 60 | -21.302 | 21.794 | 4.607  | 1.00  | 54.96 |      | H0 |
| ANISOU10515 | HB2 | ASP D 60 | 7740    | 7460   | 5680   | -1020 | 1180  | 370  | H0 |
| ATOM 10516  | HB3 | ASP D 60 | -22.558 | 22.574 | 4.039  | 1.00  | 55.87 |      | H0 |
| ANISOU10516 | HB3 | ASP D 60 | 7920    | 7590   | 5710   | -950  | 1090  | 520  | H0 |
| ATOM 10517  | N   | ARG D 61 | -20.446 | 24.671 | 1.369  | 1.00  | 63.03 |      | N0 |
| ANISOU10517 | N   | ARG D 61 | 8990    | 8550   | 6400   | -1070 | 1420  | 940  | N0 |
| ATOM 10518  | CA  | ARG D 61 | -20.751 | 25.646 | 0.286  | 1.00  | 66.52 |      | C0 |
| ANISOU10518 | CA  | ARG D 61 | 9540    | 9020   | 6710   | -1050 | 1450  | 1170 | C0 |
| ATOM 10519  | C   | ARG D 61 | -21.714 | 25.041 | -0.745 | 1.00  | 66.91 |      | C0 |
| ANISOU10519 | C   | ARG D 61 | 9640    | 9280   | 6510   | -960  | 1350  | 1180 | C0 |
| ATOM 10520  | O   | ARG D 61 | -22.306 | 25.826 | -1.506 | 1.00  | 68.78 |      | O0 |
| ANISOU10520 | O   | ARG D 61 | 9960    | 9540   | 6630   | -910  | 1320  | 1380 | O0 |
| ATOM 10521  | CB  | ARG D 61 | -19.459 | 26.112 | -0.393 | 1.00  | 69.40 |      | C0 |
| ANISOU10521 | CB  | ARG D 61 | 9920    | 9410   | 7040   | -1150 | 1630  | 1290 | C0 |
| ATOM 10522  | CG  | ARG D 61 | -18.666 | 27.126 | 0.418  | 1.00  | 70.70 |      | C0 |
| ANISOU10522 | CG  | ARG D 61 | 10060   | 9360   | 7440   | -1250 | 1710  | 1350 | C0 |
| ATOM 10523  | CD  | ARG D 61 | -17.452 | 27.609 | -0.353 | 1.00  | 74.16 |      | C0 |
| ANISOU10523 | CD  | ARG D 61 | 10500   | 9840   | 7830   | -1360 | 1890  | 1490 | C0 |
| ATOM 10524  | NE  | ARG D 61 | -16.544 | 28.401 | 0.468  | 1.00  | 75.03 |      | N0 |
| ANISOU10524 | NE  | ARG D 61 | 10560   | 9770   | 8180   | -1500 | 1970  | 1500 | N0 |
| ATOM 10525  | CZ  | ARG D 61 | -15.335 | 28.809 | 0.085  | 1.00  | 77.66 |      | C0 |
| ANISOU10525 | CZ  | ARG D 61 | 10850   | 10130  | 8520   | -1640 | 2130  | 1600 | C0 |
| ATOM 10526  | NH1 | ARG D 61 | -14.588 | 29.525 | 0.910  | 1.00  | 78.22 |      | N0 |
| ANISOU10526 | NH1 | ARG D 61 | 10870   | 10030  | 8810   | -1790 | 2180  | 1590 | N0 |
| ATOM 10527  | NH2 | ARG D 61 | -14.869 | 28.499 | -1.115 | 1.00  | 79.34 |      | N0 |
| ANISOU10527 | NH2 | ARG D 61 | 11070   | 10550  | 8520   | -1650 | 2240  | 1680 | N0 |
| ATOM 10528  | H   | ARG D 61 | -19.588 | 24.368 | 1.349  | 1.00  | 62.97 |      | H0 |

|             |      |          |         |        |        |       |       |      |    |
|-------------|------|----------|---------|--------|--------|-------|-------|------|----|
| ANISOU10528 | H    | ARG D 61 | 8950    | 8580   | 6400   | -1120 | 1510  | 900  | H0 |
| ATOM 10529  | HA   | ARG D 61 | -21.187 | 26.428 | 0.695  | 1.00  | 66.49 |      | H0 |
| ANISOU10529 | HA   | ARG D 61 | 9560    | 8890   | 6810   | -1020 | 1400  | 1260 | H0 |
| ATOM 10530  | HB2  | ARG D 61 | -18.894 | 25.331 | -0.563 | 1.00  | 69.11 |      | H0 |
| ANISOU10530 | HB2  | ARG D 61 | 9840    | 9480   | 6940   | -1170 | 1680  | 1180 | H0 |
| ATOM 10531  | HB3  | ARG D 61 | -19.688 | 26.512 | -1.258 | 1.00  | 70.89 |      | H0 |
| ANISOU10531 | HB3  | ARG D 61 | 10180   | 9660   | 7090   | -1120 | 1640  | 1430 | H0 |
| ATOM 10532  | HG2  | ARG D 61 | -19.238 | 27.893 | 0.633  | 1.00  | 71.07 |      | H0 |
| ANISOU10532 | HG2  | ARG D 61 | 10170   | 9280   | 7560   | -1220 | 1660  | 1440 | H0 |
| ATOM 10533  | HG3  | ARG D 61 | -18.374 | 26.718 | 1.260  | 1.00  | 69.38 |      | H0 |
| ANISOU10533 | HG3  | ARG D 61 | 9810    | 9150   | 7400   | -1270 | 1690  | 1210 | H0 |
| ATOM 10534  | HD2  | ARG D 61 | -16.971 | 26.833 | -0.708 | 1.00  | 73.91 |      | H0 |
| ANISOU10534 | HD2  | ARG D 61 | 10420   | 9960   | 7700   | -1370 | 1940  | 1400 | H0 |
| ATOM 10535  | HD3  | ARG D 61 | -17.751 | 28.151 | -1.114 | 1.00  | 75.47 |      | H0 |
| ANISOU10535 | HD3  | ARG D 61 | 10760   | 10020  | 7890   | -1340 | 1900  | 1650 | H0 |
| ATOM 10536  | HE   | ARG D 61 | -16.812 | 28.626 | 1.267  | 1.00  | 74.26 |      | H0 |
| ANISOU10536 | HE   | ARG D 61 | 10460   | 9540   | 8210   | -1500 | 1900  | 1450 | H0 |
| ATOM 10537  | HH11 | ARG D 61 | -14.892 | 29.731 | 1.709  | 1.00  | 77.14 |      | H0 |
| ANISOU10537 | HH11 | ARG D 61 | 10740   | 9770   | 8810   | -1780 | 2100  | 1530 | H0 |
| ATOM 10538  | HH12 | ARG D 61 | -13.790 | 29.793 | 0.659  | 1.00  | 79.28 |      | H0 |
| ANISOU10538 | HH12 | ARG D 61 | 10970   | 10190  | 8960   | -1890 | 2280  | 1660 | H0 |
| ATOM 10539  | HH21 | ARG D 61 | -15.357 | 28.024 | -1.672 | 1.00  | 79.21 |      | H0 |
| ANISOU10539 | HH21 | ARG D 61 | 11100   | 10650  | 8350   | -1560 | 2210  | 1670 | H0 |
| ATOM 10540  | HH22 | ARG D 61 | -14.068 | 28.773 | -1.357 | 1.00  | 80.44 |      | H0 |
| ANISOU10540 | HH22 | ARG D 61 | 11180   | 10710  | 8670   | -1740 | 2360  | 1750 | H0 |
| ATOM 10541  | N    | THR D 62 | -21.866 | 23.714 | -0.777 | 1.00  | 65.90 |      | N0 |
| ANISOU10541 | N    | THR D 62 | 9470    | 9280   | 6290   | -960  | 1300  | 980  | N0 |
| ATOM 10542  | CA   | THR D 62 | -22.802 | 22.999 | -1.688 | 1.00  | 67.14 |      | C0 |
| ANISOU10542 | CA   | THR D 62 | 9670    | 9640   | 6200   | -900  | 1200  | 950  | C0 |
| ATOM 10543  | C    | THR D 62 | -24.250 | 23.213 | -1.223 | 1.00  | 66.35 |      | C0 |
| ANISOU10543 | C    | THR D 62 | 9550    | 9520   | 6140   | -830  | 1020  | 970  | C0 |
| ATOM 10544  | O    | THR D 62 | -25.160 | 23.016 | -2.048 | 1.00  | 68.34 |      | O0 |
| ANISOU10544 | O    | THR D 62 | 9830    | 9940   | 6190   | -780  | 910   | 1010 | O0 |
| ATOM 10545  | CB   | THR D 62 | -22.455 | 21.508 | -1.796 | 1.00  | 66.86 |      | C0 |
| ANISOU10545 | CB   | THR D 62 | 9610    | 9710   | 6080   | -940  | 1210  | 710  | C0 |
| ATOM 10546  | OG1  | THR D 62 | -22.534 | 20.925 | -0.495 | 1.00  | 65.40 |      | O0 |
| ANISOU10546 | OG1  | THR D 62 | 9350    | 9390   | 6100   | -950  | 1160  | 550  | O0 |
| ATOM 10547  | CG2  | THR D 62 | -21.082 | 21.267 | -2.382 | 1.00  | 68.23 |      | C0 |
| ANISOU10547 | CG2  | THR D 62 | 9800    | 9940   | 6180   | -980  | 1400  | 690  | C0 |
| ATOM 10548  | H    | THR D 62 | -21.396 | 23.143 | -0.246 | 1.00  | 64.96 |      | H0 |
| ANISOU10548 | H    | THR D 62 | 9300    | 9130   | 6250   | -990  | 1330  | 860  | H0 |
| ATOM 10549  | HA   | THR D 62 | -22.707 | 23.399 | -2.583 | 1.00  | 68.69 |      | H0 |
| ANISOU10549 | HA   | THR D 62 | 9930    | 9920   | 6250   | -900  | 1240  | 1070 | H0 |
| ATOM 10550  | HB   | THR D 62 | -23.127 | 21.077 | -2.377 | 1.00  | 67.68 |      | H0 |
| ANISOU10550 | HB   | THR D 62 | 9750    | 9940   | 6020   | -920  | 1130  | 680  | H0 |
| ATOM 10551  | HG21 | THR D 62 | -21.020 | 21.694 | -3.255 | 1.00  | 69.67 |      | H0 |
| ANISOU10551 | HG21 | THR D 62 | 10040   | 10220  | 6210   | -970  | 1440  | 810  | H0 |
| ATOM 10552  | HG22 | THR D 62 | -20.933 | 20.309 | -2.480 | 1.00  | 67.87 |      | H0 |
| ANISOU10552 | HG22 | THR D 62 | 9750    | 9960   | 6070   | -980  | 1400  | 530  | H0 |
| ATOM 10553  | HG23 | THR D 62 | -20.404 | 21.641 | -1.791 | 1.00  | 67.50 |      | H0 |
| ANISOU10553 | HG23 | THR D 62 | 9660    | 9740   | 6240   | -1010 | 1470  | 710  | H0 |
| ATOM 10554  | N    | LEU D 63 | -24.451 | 23.595 | 0.043  | 1.00  | 64.12 |      | N0 |
| ANISOU10554 | N    | LEU D 63 | 9210    | 9050   | 6100   | -820  | 980   | 950  | N0 |
| ATOM 10555  | CA   | LEU D 63 | -25.783 | 23.929 | 0.619  | 1.00  | 62.98 |      | C0 |

|             |      |          |         |        |        |      |       |      |    |
|-------------|------|----------|---------|--------|--------|------|-------|------|----|
| ANISOU10555 | CA   | LEU D 63 | 9020    | 8880   | 6030   | -730 | 840   | 980  | C0 |
| ATOM 10556  | C    | LEU D 63 | -26.189 | 25.358 | 0.238  | 1.00 | 63.98 |      | C0 |
| ANISOU10556 | C    | LEU D 63 | 9220    | 8940   | 6150   | -640 | 830   | 1230 | C0 |
| ATOM 10557  | O    | LEU D 63 | -27.394 | 25.652 | 0.309  | 1.00 | 65.28 |      | O0 |
| ANISOU10557 | O    | LEU D 63 | 9360    | 9150   | 6300   | -540 | 710   | 1300 | O0 |
| ATOM 10558  | CB   | LEU D 63 | -25.732 | 23.787 | 2.143  | 1.00 | 60.47 |      | C0 |
| ANISOU10558 | CB   | LEU D 63 | 8630    | 8390   | 5960   | -740 | 820   | 850  | C0 |
| ATOM 10559  | CG   | LEU D 63 | -25.405 | 22.395 | 2.680  | 1.00 | 58.97 |      | C0 |
| ANISOU10559 | CG   | LEU D 63 | 8370    | 8240   | 5790   | -810 | 820   | 630  | C0 |
| ATOM 10560  | CD1  | LEU D 63 | -25.356 | 22.406 | 4.200  | 1.00 | 57.00 |      | C0 |
| ANISOU10560 | CD1  | LEU D 63 | 8050    | 7840   | 5770   | -820 | 810   | 540  | C0 |
| ATOM 10561  | CD2  | LEU D 63 | -26.412 | 21.367 | 2.196  | 1.00 | 59.54 |      | C0 |
| ANISOU10561 | CD2  | LEU D 63 | 8430    | 8490   | 5700   | -810 | 700   | 540  | C0 |
| ATOM 10562  | H    | LEU D 63 | -23.773 | 23.661 | 0.646  | 1.00 | 63.29 |      | H0 |
| ANISOU10562 | H    | LEU D 63 | 9080    | 8840   | 6130   | -860 | 1050  | 900  | H0 |
| ATOM 10563  | HA   | LEU D 63 | -26.448 | 23.303 | 0.251  | 1.00 | 63.13 |      | H0 |
| ANISOU10563 | HA   | LEU D 63 | 9030    | 9040   | 5920   | -720 | 750   | 930  | H0 |
| ATOM 10564  | HB2  | LEU D 63 | -25.067 | 24.415 | 2.488  | 1.00 | 60.53 |      | H0 |
| ANISOU10564 | HB2  | LEU D 63 | 8650    | 8270   | 6080   | -770 | 900   | 900  | H0 |
| ATOM 10565  | HB3  | LEU D 63 | -26.601 | 24.056 | 2.503  | 1.00 | 60.48 |      | H0 |
| ANISOU10565 | HB3  | LEU D 63 | 8600    | 8380   | 6000   | -680 | 740   | 880  | H0 |
| ATOM 10566  | HG   | LEU D 63 | -24.512 | 22.136 | 2.344  | 1.00 | 59.17 |      | H0 |
| ANISOU10566 | HG   | LEU D 63 | 8420    | 8280   | 5780   | -860 | 910   | 600  | H0 |
| ATOM 10567  | HD11 | LEU D 63 | -24.808 | 23.150 | 4.503  | 1.00 | 57.11 |      | H0 |
| ANISOU10567 | HD11 | LEU D 63 | 8080    | 7740   | 5890   | -820 | 880   | 590  | H0 |
| ATOM 10568  | HD12 | LEU D 63 | -24.972 | 21.570 | 4.518  | 1.00 | 56.20 |      | H0 |
| ANISOU10568 | HD12 | LEU D 63 | 7920    | 7740   | 5690   | -860 | 830   | 410  | H0 |
| ATOM 10569  | HD13 | LEU D 63 | -26.258 | 22.502 | 4.553  | 1.00 | 56.84 |      | H0 |
| ANISOU10569 | HD13 | LEU D 63 | 8000    | 7820   | 5780   | -770 | 720   | 550  | H0 |
| ATOM 10570  | HD21 | LEU D 63 | -27.313 | 21.713 | 2.316  | 1.00 | 59.69 |      | H0 |
| ANISOU10570 | HD21 | LEU D 63 | 8420    | 8530   | 5720   | -760 | 610   | 600  | H0 |
| ATOM 10571  | HD22 | LEU D 63 | -26.309 | 20.546 | 2.707  | 1.00 | 58.40 |      | H0 |
| ANISOU10571 | HD22 | LEU D 63 | 8250    | 8330   | 5610   | -850 | 690   | 400  | H0 |
| ATOM 10572  | HD23 | LEU D 63 | -26.259 | 21.181 | 1.253  | 1.00 | 60.55 |      | H0 |
| ANISOU10572 | HD23 | LEU D 63 | 8610    | 8730   | 5670   | -820 | 720   | 560  | H0 |
| ATOM 10573  | N    | ALA D 64 | -25.229 | 26.216 | -0.125 | 1.00 | 64.13 |      | N0 |
| ANISOU10573 | N    | ALA D 64 | 9310    | 8850   | 6200   | -680 | 970   | 1370 | N0 |
| ATOM 10574  | CA   | ALA D 64 | -25.422 | 27.679 | -0.288 | 1.00 | 65.44 |      | C0 |
| ANISOU10574 | CA   | ALA D 64 | 9560    | 8870   | 6430   | -610 | 1000  | 1620 | C0 |
| ATOM 10575  | C    | ALA D 64 | -26.406 | 27.968 | -1.428 | 1.00 | 66.80 |      | C0 |
| ANISOU10575 | C    | ALA D 64 | 9790    | 9230   | 6370   | -490 | 900   | 1800 | C0 |
| ATOM 10576  | O    | ALA D 64 | -26.240 | 27.393 | -2.522 | 1.00 | 67.74 |      | O0 |
| ANISOU10576 | O    | ALA D 64 | 9930    | 9560   | 6250   | -520 | 910   | 1810 | O0 |
| ATOM 10577  | CB   | ALA D 64 | -24.098 | 28.363 | -0.525 | 1.00 | 66.25 |      | C0 |
| ANISOU10577 | CB   | ALA D 64 | 9730    | 8850   | 6590   | -720 | 1170  | 1710 | C0 |
| ATOM 10578  | H    | ALA D 64 | -24.374 | 25.961 | -0.302 | 1.00 | 64.22 |      | H0 |
| ANISOU10578 | H    | ALA D 64 | 9330    | 8870   | 6200   | -750 | 1060  | 1330 | H0 |
| ATOM 10579  | HA   | ALA D 64 | -25.808 | 28.029 | 0.548  | 1.00 | 64.59 |      | H0 |
| ANISOU10579 | HA   | ALA D 64 | 9430    | 8640   | 6470   | -570 | 950   | 1590 | H0 |
| ATOM 10580  | HB1  | ALA D 64 | -24.224 | 29.327 | -0.517 | 1.00 | 67.38 |      | H0 |
| ANISOU10580 | HB1  | ALA D 64 | 9940    | 8860   | 6800   | -680 | 1190  | 1860 | H0 |
| ATOM 10581  | HB2  | ALA D 64 | -23.473 | 28.114 | 0.176  | 1.00 | 65.05 |      | H0 |
| ANISOU10581 | HB2  | ALA D 64 | 9530    | 8610   | 6570   | -790 | 1220  | 1590 | H0 |
| ATOM 10582  | HB3  | ALA D 64 | -23.741 | 28.092 | -1.387 | 1.00 | 67.23 |      | H0 |

|             |       |     |     |    |       |         |        |        |      |       |    |
|-------------|-------|-----|-----|----|-------|---------|--------|--------|------|-------|----|
| ANISOU10582 | HB3   | ALA | D   | 64 | 9880  | 9110    | 6550   | -750   | 1220 | 1750  | H0 |
| ATOM        | 10583 | N   | TRP | D  | 65    | -27.389 | 28.833 | -1.163 | 1.00 | 67.01 | N0 |
| ANISOU10583 | N     | TRP | D   | 65 | 9830  | 9170    | 6470   | -350   | 820  | 1940  | N0 |
| ATOM        | 10584 | CA  | TRP | D  | 65    | -28.430 | 29.283 | -2.126 | 1.00 | 68.74 | C0 |
| ANISOU10584 | CA    | TRP | D   | 65 | 10080 | 9550    | 6490   | -200   | 720  | 2150  | C0 |
| ATOM        | 10585 | C   | TRP | D  | 65    | -28.510 | 30.811 | -2.090 | 1.00 | 71.63 | C0 |
| ANISOU10585 | C     | TRP | D   | 65 | 10560 | 9680    | 6980   | -90    | 770  | 2410  | C0 |
| ATOM        | 10586 | O   | TRP | D  | 65    | -27.877 | 31.411 | -1.197 | 1.00 | 70.40 | O0 |
| ANISOU10586 | O     | TRP | D   | 65 | 10440 | 9240    | 7070   | -140   | 870  | 2380  | O0 |
| ATOM        | 10587 | CB  | TRP | D  | 65    | -29.786 | 28.640 | -1.803 | 1.00 | 67.20 | C0 |
| ANISOU10587 | CB    | TRP | D   | 65 | 9750  | 9530    | 6250   | -110   | 530  | 2050  | C0 |
| ATOM        | 10588 | CG  | TRP | D  | 65    | -30.458 | 29.206 | -0.586 | 1.00 | 65.55 | C0 |
| ANISOU10588 | CG    | TRP | D   | 65 | 9490  | 9130    | 6280   | 0      | 490  | 2030  | C0 |
| ATOM        | 10589 | CD1 | TRP | D  | 65    | -31.279 | 30.294 | -0.536 | 1.00 | 66.79 | C0 |
| ANISOU10589 | CD1   | TRP | D   | 65 | 9680  | 9210    | 6490   | 190    | 450  | 2230  | C0 |
| ATOM        | 10590 | CD2 | TRP | D  | 65    | -30.371 | 28.713 | 0.763  | 1.00 | 62.14 | C0 |
| ANISOU10590 | CD2   | TRP | D   | 65 | 8970  | 8580    | 6050   | -60    | 490  | 1810  | C0 |
| ATOM        | 10591 | NE1 | TRP | D  | 65    | -31.705 | 30.513 | 0.745  | 1.00 | 65.14 | N0 |
| ANISOU10591 | NE1   | TRP | D   | 65 | 9410  | 8840    | 6500   | 260    | 430  | 2130  | N0 |
| ATOM        | 10592 | CE2 | TRP | D  | 65    | -31.166 | 29.560 | 1.565  | 1.00 | 62.30 | C0 |
| ANISOU10592 | CE2   | TRP | D   | 65 | 8970  | 8460    | 6230   | 100    | 450  | 1880  | C0 |
| ATOM        | 10593 | CE3 | TRP | D  | 65    | -29.699 | 27.647 | 1.374  | 1.00 | 59.68 | C0 |
| ANISOU10593 | CE3   | TRP | D   | 65 | 8600  | 8270    | 5800   | -210   | 530  | 1570  | C0 |
| ATOM        | 10594 | CZ2 | TRP | D  | 65    | -31.303 | 29.370 | 2.941  | 1.00 | 60.04 | C0 |
| ANISOU10594 | CZ2   | TRP | D   | 65 | 8610  | 8050    | 6150   | 100    | 450  | 1700  | C0 |
| ATOM        | 10595 | CZ3 | TRP | D  | 65    | -29.836 | 27.459 | 2.732  | 1.00 | 57.30 | C0 |
| ANISOU10595 | CZ3   | TRP | D   | 65 | 8230  | 7840    | 5700   | -220   | 520  | 1410  | C0 |
| ATOM        | 10596 | CH2 | TRP | D  | 65    | -30.627 | 28.312 | 3.504  | 1.00 | 57.61 | C0 |
| ANISOU10596 | CH2   | TRP | D   | 65 | 8250  | 7760    | 5880   | -70    | 480  | 1480  | C0 |
| ATOM        | 10597 | H   | TRP | D  | 65    | -27.489 | 29.215 | -0.342 | 1.00 | 66.32 | H0 |
| ANISOU10597 | H     | TRP | D   | 65 | 9720  | 8920    | 6550   | -320   | 820  | 1910  | H0 |
| ATOM        | 10598 | HA  | TRP | D  | 65    | -28.161 | 28.997 | -3.030 | 1.00 | 69.85 | H0 |
| ANISOU10598 | HA    | TRP | D   | 65 | 10250 | 9840    | 6450   | -240   | 740  | 2190  | H0 |
| ATOM        | 10599 | HB2 | TRP | D  | 65    | -30.375 | 28.758 | -2.576 | 1.00 | 68.81 | H0 |
| ANISOU10599 | HB2   | TRP | D   | 65 | 9960  | 9890    | 6290   | -30    | 460  | 2170  | H0 |
| ATOM        | 10600 | HB3 | TRP | D  | 65    | -29.649 | 27.680 | -1.675 | 1.00 | 65.94 | H0 |
| ANISOU10600 | HB3   | TRP | D   | 65 | 9540  | 9460    | 6060   | -200   | 510  | 1870  | H0 |
| ATOM        | 10601 | HD1 | TRP | D  | 65    | -31.524 | 30.823 | -1.277 | 1.00 | 68.61 | H0 |
| ANISOU10601 | HD1   | TRP | D   | 65 | 9960  | 9490    | 6610   | 280    | 430  | 2420  | H0 |
| ATOM        | 10602 | HE1 | TRP | D  | 65    | -32.238 | 31.159 | 0.996  | 1.00 | 65.95 | H0 |
| ANISOU10602 | HE1   | TRP | D   | 65 | 9520  | 8870    | 6670   | 390    | 400  | 2220  | H0 |
| ATOM        | 10603 | HE3 | TRP | D  | 65    | -29.163 | 27.068 | 0.862  | 1.00 | 59.54 | H0 |
| ANISOU10603 | HE3   | TRP | D   | 65 | 8600  | 8340    | 5680   | -300   | 560  | 1510  | H0 |
| ATOM        | 10604 | HZ2 | TRP | D  | 65    | -31.838 | 29.945 | 3.461  | 1.00 | 60.52 | H0 |
| ANISOU10604 | HZ2   | TRP | D   | 65 | 8660  | 8030    | 6310   | 210    | 430  | 1740  | H0 |
| ATOM        | 10605 | HZ3 | TRP | D  | 65    | -29.388 | 26.741 | 3.149  | 1.00 | 56.09 | H0 |
| ANISOU10605 | HZ3   | TRP | D   | 65 | 8040  | 7690    | 5590   | -310   | 540  | 1260  | H0 |
| ATOM        | 10606 | HH2 | TRP | D  | 65    | -30.704 | 28.157 | 4.428  | 1.00 | 56.55 | H0 |
| ANISOU10606 | HH2   | TRP | D   | 65 | 8060  | 7560    | 5870   | -70    | 470  | 1370  | H0 |
| ATOM        | 10607 | N   | ASN | D  | 66    | -29.282 | 31.396 | -3.013 | 1.00 | 75.35 | N0 |
| ANISOU10607 | N     | ASN | D   | 66 | 11080 | 10270   | 7280   | 60     | 710  | 2650  | N0 |
| ATOM        | 10608 | CA  | ASN | D  | 66    | -29.465 | 32.862 | -3.187 | 1.00 | 78.78 | C0 |
| ANISOU10608 | CA    | ASN | D   | 66 | 11640 | 10490   | 7800   | 200    | 750  | 2940  | C0 |
| ATOM        | 10609 | C   | ASN | D  | 66    | -30.604 | 33.343 | -2.278 | 1.00 | 78.47 | C0 |

|             |     |          |         |        |        |      |       |      |    |
|-------------|-----|----------|---------|--------|--------|------|-------|------|----|
| ANISOU10609 | C   | ASN D 66 | 11550   | 10340  | 7930   | 390  | 650   | 2940 | C0 |
| ATOM 10610  | O   | ASN D 66 | -31.768 | 33.016 | -2.578 | 1.00 | 78.72 |      | O0 |
| ANISOU10610 | O   | ASN D 66 | 11480   | 10620  | 7810   | 540  | 490   | 2970 | O0 |
| ATOM 10611  | CB  | ASN D 66 | -29.730 | 33.203 | -4.657 | 1.00 | 82.89 |      | C0 |
| ANISOU10611 | CB  | ASN D 66 | 12240   | 11210  | 8040   | 290  | 730   | 3210 | C0 |
| ATOM 10612  | CG  | ASN D 66 | -29.670 | 34.686 | -4.949 | 1.00 | 86.72 |      | C0 |
| ANISOU10612 | CG  | ASN D 66 | 12900   | 11450  | 8600   | 400  | 820   | 3540 | C0 |
| ATOM 10613  | OD1 | ASN D 66 | -30.115 | 35.503 | -4.146 | 1.00 | 86.42 |      | O0 |
| ANISOU10613 | OD1 | ASN D 66 | 12890   | 11150  | 8790   | 530  | 810   | 3590 | O0 |
| ATOM 10614  | ND2 | ASN D 66 | -29.125 | 35.035 | -6.103 | 1.00 | 91.68 |      | N0 |
| ANISOU10614 | ND2 | ASN D 66 | 13640   | 12160  | 9040   | 370  | 900   | 3760 | N0 |
| ATOM 10615  | H   | ASN D 66 | -29.763 | 30.906 | -3.613 | 1.00 | 75.81 |      | H0 |
| ANISOU10615 | H   | ASN D 66 | 11090   | 10550  | 7160   | 90   | 620   | 2650 | H0 |
| ATOM 10616  | HA  | ASN D 66 | -28.631 | 33.314 | -2.918 | 1.00 | 78.67 |      | H0 |
| ANISOU10616 | HA  | ASN D 66 | 11710   | 10270  | 7920   | 110  | 870   | 2950 | H0 |
| ATOM 10617  | HB2 | ASN D 66 | -29.066 | 32.743 | -5.211 | 1.00 | 82.85 |      | H0 |
| ANISOU10617 | HB2 | ASN D 66 | 12250   | 11320  | 7900   | 170  | 790   | 3180 | H0 |
| ATOM 10618  | HB3 | ASN D 66 | -30.614 | 32.865 | -4.906 | 1.00 | 83.22 |      | H0 |
| ANISOU10618 | HB3 | ASN D 66 | 12210   | 11460  | 7950   | 390  | 600   | 3220 | H0 |
| ATOM 10619  | N   | SER D 67 | -30.281 | 34.121 | -1.237 | 1.00 | 78.42 |      | N0 |
| ANISOU10619 | N   | SER D 67 | 11610   | 9990   | 8200   | 400  | 730   | 2910 | N0 |
| ATOM 10620  | CA  | SER D 67 | -31.221 | 34.559 | -0.166 | 1.00 | 78.88 |      | C0 |
| ANISOU10620 | CA  | SER D 67 | 11620   | 9910   | 8450   | 570  | 660   | 2860 | C0 |
| ATOM 10621  | C   | SER D 67 | -31.897 | 35.888 | -0.539 | 1.00 | 82.04 |      | C0 |
| ANISOU10621 | C   | SER D 67 | 12140   | 10160  | 8870   | 820  | 660   | 3160 | C0 |
| ATOM 10622  | O   | SER D 67 | -32.655 | 36.421 | 0.303  | 1.00 | 82.04 |      | O0 |
| ANISOU10622 | O   | SER D 67 | 12120   | 10010  | 9030   | 1000 | 620   | 3140 | O0 |
| ATOM 10623  | CB  | SER D 67 | -30.524 | 34.643 | 1.179  | 1.00 | 76.86 |      | C0 |
| ANISOU10623 | CB  | SER D 67 | 11370   | 9370   | 8460   | 460  | 750   | 2640 | C0 |
| ATOM 10624  | OG  | SER D 67 | -30.286 | 35.992 | 1.564  | 1.00 | 78.90 |      | O0 |
| ANISOU10624 | OG  | SER D 67 | 11800   | 9260   | 8920   | 520  | 840   | 2770 | O0 |
| ATOM 10625  | H   | SER D 67 | -29.442 | 34.455 | -1.113 | 1.00 | 78.49 |      | H0 |
| ANISOU10625 | H   | SER D 67 | 11700   | 9820   | 8300   | 290  | 840   | 2910 | H0 |
| ATOM 10626  | HA  | SER D 67 | -31.934 | 33.868 | -0.095 | 1.00 | 77.93 |      | H0 |
| ANISOU10626 | HA  | SER D 67 | 11370   | 10000  | 8240   | 620  | 550   | 2770 | H0 |
| ATOM 10627  | HB2 | SER D 67 | -31.079 | 34.202 | 1.859  | 1.00 | 75.61 |      | H0 |
| ANISOU10627 | HB2 | SER D 67 | 11100   | 9280   | 8340   | 500  | 680   | 2500 | H0 |
| ATOM 10628  | HB3 | SER D 67 | -29.668 | 34.165 | 1.129  | 1.00 | 75.79 |      | H0 |
| ANISOU10628 | HB3 | SER D 67 | 11230   | 9250   | 8310   | 280  | 810   | 2550 | H0 |
| ATOM 10629  | N   | SER D 68 | -31.638 | 36.409 | -1.744 | 1.00 | 84.81 |      | N0 |
| ANISOU10629 | N   | SER D 68 | 12620   | 10540  | 9070   | 840  | 700   | 3430 | N0 |
| ATOM 10630  | CA  | SER D 68 | -32.419 | 37.515 | -2.356 | 1.00 | 88.28 |      | C0 |
| ANISOU10630 | CA  | SER D 68 | 13160   | 10920  | 9460   | 1100 | 670   | 3760 | C0 |
| ATOM 10631  | C   | SER D 68 | -33.845 | 37.013 | -2.594 | 1.00 | 88.67 |      | C0 |
| ANISOU10631 | C   | SER D 68 | 13030   | 11320  | 9340   | 1310 | 480   | 3780 | C0 |
| ATOM 10632  | O   | SER D 68 | -33.990 | 35.894 | -3.130 | 1.00 | 87.62 |      | O0 |
| ANISOU10632 | O   | SER D 68 | 12760   | 11550  | 8980   | 1210 | 380   | 3670 | O0 |
| ATOM 10633  | CB  | SER D 68 | -31.791 | 38.009 | -3.636 | 1.00 | 91.06 |      | C0 |
| ANISOU10633 | CB  | SER D 68 | 13670   | 11280  | 9650   | 1050 | 760   | 4040 | C0 |
| ATOM 10634  | OG  | SER D 68 | -30.394 | 38.204 | -3.474 | 1.00 | 90.46 |      | O0 |
| ANISOU10634 | OG  | SER D 68 | 13710   | 10960  | 9700   | 800  | 930   | 3990 | O0 |
| ATOM 10635  | H   | SER D 68 | -30.951 | 36.135 | -2.274 | 1.00 | 84.68 |      | H0 |
| ANISOU10635 | H   | SER D 68 | 12630   | 10590  | 8960   | 700  | 760   | 3440 | H0 |
| ATOM 10636  | HA  | SER D 68 | -32.452 | 38.267 | -1.706 | 1.00 | 88.80 |      | H0 |

|             |     |          |         |        |        |      |        |      |    |
|-------------|-----|----------|---------|--------|--------|------|--------|------|----|
| ANISOU10636 | HA  | SER D 68 | 13310   | 10700  | 9730   | 1180 | 720    | 3780 | H0 |
| ATOM 10637  | HB2 | SER D 68 | -31.950 | 37.354 | -4.352 | 1.00 | 91.02  |      | H0 |
| ANISOU10637 | HB2 | SER D 68 | 13590   | 11580  | 9420   | 1030 | 690    | 4050 | H0 |
| ATOM 10638  | HB3 | SER D 68 | -32.212 | 38.858 | -3.898 | 1.00 | 93.34  |      | H0 |
| ANISOU10638 | HB3 | SER D 68 | 14050   | 11460  | 9950   | 1230 | 760    | 4260 | H0 |
| ATOM 10639  | N   | HIS D 69 | -34.846 | 37.787 | -2.166 | 1.00 | 90.17  |      | N0 |
| ANISOU10639 | N   | HIS D 69 | 13210   | 11410  | 9640   | 1590 | 420    | 3890 | N0 |
| ATOM 10640  | CA  | HIS D 69 | -36.295 | 37.486 | -2.324 | 1.00 | 91.18  |      | C0 |
| ANISOU10640 | CA  | HIS D 69 | 13150   | 11870  | 9630   | 1820 | 240    | 3940 | C0 |
| ATOM 10641  | C   | HIS D 69 | -36.605 | 36.077 | -1.796 | 1.00 | 87.46  |      | C0 |
| ANISOU10641 | C   | HIS D 69 | 12440   | 11690  | 9110   | 1670 | 130    | 3620 | C0 |
| ATOM 10642  | O   | HIS D 69 | -37.545 | 35.450 | -2.323 | 1.00 | 88.25  |      | O0 |
| ANISOU10642 | O   | HIS D 69 | 12360   | 12170  | 9000   | 1740 | -30    | 3640 | O0 |
| ATOM 10643  | CB  | HIS D 69 | -36.713 | 37.648 | -3.795 | 1.00 | 94.70  |      | C0 |
| ANISOU10643 | CB  | HIS D 69 | 13610   | 12600  | 9780   | 1940 | 160    | 4240 | C0 |
| ATOM 10644  | CG  | HIS D 69 | -36.348 | 38.965 | -4.397 | 1.00 | 98.20  |      | C0 |
| ANISOU10644 | CG  | HIS D 69 | 14290   | 12760  | 10250  | 2070 | 270    | 4580 | C0 |
| ATOM 10645  | ND1 | HIS D 69 | -35.092 | 39.216 | -4.920 | 1.00 | 98.70  |      | N0 |
| ANISOU10645 | ND1 | HIS D 69 | 14550   | 12650  | 10300  | 1860 | 420    | 4660 | N0 |
| ATOM 10646  | CD2 | HIS D 69 | -37.067 | 40.096 | -4.578 | 1.00 | 101.76 |      | C0 |
| ANISOU10646 | CD2 | HIS D 69 | 14830   | 13080  | 10750  | 2380 | 260    | 4880 | C0 |
| ATOM 10647  | CE1 | HIS D 69 | -35.052 | 40.448 | -5.389 | 1.00 | 102.04 |      | C0 |
| ANISOU10647 | CE1 | HIS D 69 | 15170   | 12830  | 10760  | 2020 | 500    | 4990 | C0 |
| ATOM 10648  | NE2 | HIS D 69 | -36.252 | 41.010 | -5.192 | 1.00 | 103.89 |      | N0 |
| ANISOU10648 | NE2 | HIS D 69 | 15360   | 13080  | 11040  | 2350 | 400    | 5130 | N0 |
| ATOM 10649  | H   | HIS D 69 | -34.706 | 38.578 | -1.736 | 1.00 | 90.98  |      | H0 |
| ANISOU10649 | H   | HIS D 69 | 13430   | 11230  | 9910   | 1650 | 500    | 3950 | H0 |
| ATOM 10650  | HA  | HIS D 69 | -36.801 | 38.135 | -1.781 | 1.00 | 92.01  |      | H0 |
| ANISOU10650 | HA  | HIS D 69 | 13270   | 11820  | 9880   | 2000 | 240    | 3990 | H0 |
| ATOM 10651  | HB2 | HIS D 69 | -36.292 | 36.933 | -4.323 | 1.00 | 93.81  |      | H0 |
| ANISOU10651 | HB2 | HIS D 69 | 13460   | 12670  | 9500   | 1760 | 140    | 4170 | H0 |
| ATOM 10652  | HB3 | HIS D 69 | -37.686 | 37.532 | -3.861 | 1.00 | 95.50  |      | H0 |
| ANISOU10652 | HB3 | HIS D 69 | 13570   | 12910  | 9800   | 2100 | 30     | 4280 | H0 |
| ATOM 10653  | HD2 | HIS D 69 | -37.961 | 40.234 | -4.326 | 1.00 | 102.44 |      | H0 |
| ANISOU10653 | HD2 | HIS D 69 | 14820   | 13250  | 10850  | 2590 | 170    | 4910 | H0 |
| ATOM 10654  | HE1 | HIS D 69 | -34.307 | 40.860 | -5.793 | 1.00 | 102.98 |      | H0 |
| ANISOU10654 | HE1 | HIS D 69 | 15440   | 12800  | 10890  | 1920 | 610    | 5110 | H0 |
| ATOM 10655  | N   | SER D 70 | -35.848 | 35.606 | -0.796 | 1.00 | 83.96  |      | N0 |
| ANISOU10655 | N   | SER D 70 | 11990   | 11060  | 8840   | 1460 | 220    | 3340 | N0 |
| ATOM 10656  | CA  | SER D 70 | -35.952 | 34.245 | -0.201 | 1.00 | 80.18  |      | C0 |
| ANISOU10656 | CA  | SER D 70 | 11320   | 10800  | 8350   | 1290 | 150    | 3040 | C0 |
| ATOM 10657  | C   | SER D 70 | -35.717 | 34.311 | 1.305  | 1.00 | 77.20  |      | C0 |
| ANISOU10657 | C   | SER D 70 | 10930   | 10150  | 8240   | 1260 | 220    | 2820 | C0 |
| ATOM 10658  | O   | SER D 70 | -35.221 | 35.316 | 1.814  | 1.00 | 77.87  |      | O0 |
| ANISOU10658 | O   | SER D 70 | 11180   | 9880   | 8530   | 1300 | 340    | 2870 | O0 |
| ATOM 10659  | CB  | SER D 70 | -34.983 | 33.281 | -0.850 | 1.00 | 78.75  |      | C0 |
| ANISOU10659 | CB  | SER D 70 | 11160   | 10750  | 8010   | 1020 | 180    | 2920 | C0 |
| ATOM 10660  | OG  | SER D 70 | -35.600 | 32.566 | -1.910 | 1.00 | 79.90  |      | O0 |
| ANISOU10660 | OG  | SER D 70 | 11210   | 11290  | 7870   | 1020 | 40     | 2970 | O0 |
| ATOM 10661  | H   | SER D 70 | -35.210 | 36.108 | -0.383 | 1.00 | 83.64  |      | H0 |
| ANISOU10661 | H   | SER D 70 | 12070   | 10750  | 8960   | 1420 | 330    | 3330 | H0 |
| ATOM 10662  | HA  | SER D 70 | -36.876 | 33.915 | -0.358 | 1.00 | 80.70  |      | H0 |
| ANISOU10662 | HA  | SER D 70 | 11250   | 11100  | 8310   | 1390 | 30     | 3050 | H0 |
| ATOM 10663  | HB2 | SER D 70 | -34.211 | 33.782 | -1.199 | 1.00 | 79.45  |      | H0 |



|             |              |         |        |        |      |       |      |    |
|-------------|--------------|---------|--------|--------|------|-------|------|----|
| ANISOU10663 | HB2 SER D 70 | 11390   | 10680  | 8120   | 970  | 280   | 3020 | H0 |
| ATOM 10664  | HB3 SER D 70 | -34.652 | 32.644 | -0.176 | 1.00 | 76.61 |      | H0 |
| ANISOU10664 | HB3 SER D 70 | 10840   | 10450  | 7830   | 890  | 200   | 2710 | H0 |
| ATOM 10665  | N PROD 71    | -36.081 | 33.245 | 2.057  | 1.00 | 73.96 |      | N0 |
| ANISOU10665 | N PROD 71    | 10340   | 9910   | 7850   | 1170 | 150   | 2570 | N0 |
| ATOM 10666  | CA PROD 71   | -35.654 | 33.090 | 3.447  | 1.00 | 70.76 |      | C0 |
| ANISOU10666 | CA PROD 71   | 9920    | 9290   | 7670   | 1080 | 230   | 2340 | C0 |
| ATOM 10667  | C PROD 71    | -34.131 | 32.915 | 3.550  | 1.00 | 68.07 |      | C0 |
| ANISOU10667 | C PROD 71    | 9710    | 8750   | 7400   | 830  | 360   | 2230 | C0 |
| ATOM 10668  | O PROD 71    | -33.560 | 32.258 | 2.703  | 1.00 | 66.90 |      | O0 |
| ANISOU10668 | O PROD 71    | 9570    | 8750   | 7100   | 680  | 360   | 2220 | O0 |
| ATOM 10669  | CB PROD 71   | -36.376 | 31.821 | 3.928  | 1.00 | 69.29 |      | C0 |
| ANISOU10669 | CB PROD 71   | 9510    | 9400   | 7420   | 1010 | 110   | 2140 | C0 |
| ATOM 10670  | CG PROD 71   | -37.505 | 31.627 | 2.940  | 1.00 | 71.35 |      | C0 |
| ANISOU10670 | CG PROD 71   | 9650    | 10000  | 7470   | 1140 | -40   | 2300 | C0 |
| ATOM 10671  | CD PROD 71   | -36.970 | 32.155 | 1.627  | 1.00 | 73.46 |      | C0 |
| ANISOU10671 | CD PROD 71   | 10070   | 10250  | 7590   | 1140 | -10   | 2510 | C0 |
| ATOM 10672  | HA PROD 71   | -35.952 | 33.870 | 3.979  | 1.00 | 71.60 |      | H0 |
| ANISOU10672 | HA PROD 71   | 10070   | 9230   | 7910   | 1230 | 260   | 2380 | H0 |
| ATOM 10673  | HB2 PROD 71  | -35.771 | 31.049 | 3.922  | 1.00 | 67.66 |      | H0 |
| ANISOU10673 | HB2 PROD 71  | 9290    | 9230   | 7190   | 830  | 130   | 2010 | H0 |
| ATOM 10674  | HB3 PROD 71  | -36.726 | 31.941 | 4.837  | 1.00 | 68.69 |      | H0 |
| ANISOU10674 | HB3 PROD 71  | 9380    | 9250   | 7470   | 1080 | 120   | 2060 | H0 |
| ATOM 10675  | HG2 PROD 71  | -37.740 | 30.680 | 2.862  | 1.00 | 70.46 |      | H0 |
| ANISOU10675 | HG2 PROD 71  | 9420    | 10090  | 7260   | 1030 | -110  | 2190 | H0 |
| ATOM 10676  | HG3 PROD 71  | -38.299 | 32.128 | 3.217  | 1.00 | 72.54 |      | H0 |
| ANISOU10676 | HG3 PROD 71  | 9740    | 10160  | 7660   | 1330 | -70   | 2380 | H0 |
| ATOM 10677  | HD2 PROD 71  | -36.476 | 31.469 | 1.142  | 1.00 | 72.72 |      | H0 |
| ANISOU10677 | HD2 PROD 71  | 9990    | 10260  | 7380   | 980  | -10   | 2440 | H0 |
| ATOM 10678  | HD3 PROD 71  | -37.692 | 32.489 | 1.064  | 1.00 | 75.42 |      | H0 |
| ANISOU10678 | HD3 PROD 71  | 10280   | 10640  | 7730   | 1290 | -80   | 2670 | H0 |
| ATOM 10679  | N ASP D 72   | -33.526 | 33.491 | 4.591  | 1.00 | 66.79 |      | N0 |
| ANISOU10679 | N ASP D 72   | 9640    | 8280   | 7460   | 800  | 460   | 2130 | N0 |
| ATOM 10680  | CA ASP D 72  | -32.053 | 33.564 | 4.780  | 1.00 | 65.44 |      | C0 |
| ANISOU10680 | CA ASP D 72  | 9590    | 7890   | 7390   | 580  | 590   | 2040 | C0 |
| ATOM 10681  | C ASP D 72   | -31.557 | 32.287 | 5.472  | 1.00 | 61.58 |      | C0 |
| ANISOU10681 | C ASP D 72   | 8970    | 7520   | 6910   | 380  | 580   | 1770 | C0 |
| ATOM 10682  | O ASP D 72   | -30.377 | 31.938 | 5.270  | 1.00 | 60.40 |      | O0 |
| ANISOU10682 | O ASP D 72   | 8870    | 7330   | 6760   | 190  | 660   | 1710 | O0 |
| ATOM 10683  | CB ASP D 72  | -31.664 | 34.838 | 5.537  | 1.00 | 67.03 |      | C0 |
| ANISOU10683 | CB ASP D 72  | 9940    | 7700   | 7820   | 630  | 700   | 2070 | C0 |
| ATOM 10684  | CG ASP D 72  | -32.341 | 36.092 | 5.001  | 1.00 | 70.71 |      | C0 |
| ANISOU10684 | CG ASP D 72  | 10540   | 8030   | 8300   | 870  | 700   | 2330 | C0 |
| ATOM 10685  | OD1 ASP D 72 | -33.522 | 36.308 | 5.349  | 1.00 | 72.12 |      | O0 |
| ANISOU10685 | OD1 ASP D 72 | 10640   | 8270   | 8490   | 1100 | 630   | 2360 | O0 |
| ATOM 10686  | OD2 ASP D 72 | -31.694 | 36.834 | 4.224  | 1.00 | 72.60 |      | O0 |
| ANISOU10686 | OD2 ASP D 72 | 10950   | 8110   | 8530   | 830  | 790   | 2520 | O0 |
| ATOM 10687  | H ASP D 72   | -33.997 | 33.873 | 5.272  | 1.00 | 67.04 |      | H0 |
| ANISOU10687 | H ASP D 72   | 9650    | 8220   | 7600   | 920  | 460   | 2100 | H0 |
| ATOM 10688  | HA ASP D 72  | -31.637 | 33.608 | 3.889  | 1.00 | 66.26 |      | H0 |
| ANISOU10688 | HA ASP D 72  | 9750    | 8030   | 7390   | 520  | 620   | 2150 | H0 |
| ATOM 10689  | HB2 ASP D 72 | -31.904 | 34.736 | 6.481  | 1.00 | 66.05 |      | H0 |
| ANISOU10689 | HB2 ASP D 72 | 9760    | 7540   | 7790   | 660  | 690   | 1920 | H0 |
| ATOM 10690  | HB3 ASP D 72 | -30.694 | 34.962 | 5.480  | 1.00 | 66.81 |      | H0 |

|             |      |     |   |    |         |        |        |      |       |      |    |
|-------------|------|-----|---|----|---------|--------|--------|------|-------|------|----|
| ANISOU10690 | HB3  | ASP | D | 72 | 10000   | 7550   | 7840   | 480  | 780   | 2040 | H0 |
| ATOM 10691  | N    | GLN | D | 73 | -32.418 | 31.612 | 6.245  | 1.00 | 59.45 |      | N0 |
| ANISOU10691 | N    | GLN | D | 73 | 8540    | 7390   | 6650   | 440  | 490   | 1640 | N0 |
| ATOM 10692  | CA   | GLN | D | 73 | -32.093 | 30.346 | 6.962  | 1.00 | 56.23 |      | C0 |
| ANISOU10692 | CA   | GLN | D | 73 | 8020    | 7090   | 6250   | 280  | 480   | 1400 | C0 |
| ATOM 10693  | C    | GLN | D | 73 | -33.250 | 29.348 | 6.822  | 1.00 | 55.24 |      | C0 |
| ANISOU10693 | C    | GLN | D | 73 | 7720    | 7280   | 6000   | 320  | 340   | 1360 | C0 |
| ATOM 10694  | O    | GLN | D | 73 | -34.380 | 29.783 | 6.512  | 1.00 | 56.73 |      | O0 |
| ANISOU10694 | O    | GLN | D | 73 | 7850    | 7570   | 6130   | 510  | 260   | 1490 | O0 |
| ATOM 10695  | CB   | GLN | D | 73 | -31.845 | 30.597 | 8.451  | 1.00 | 55.12 |      | C0 |
| ANISOU10695 | CB   | GLN | D | 73 | 7870    | 6760   | 6310   | 270  | 530   | 1240 | C0 |
| ATOM 10696  | CG   | GLN | D | 73 | -31.070 | 31.870 | 8.753  | 1.00 | 56.25 |      | C0 |
| ANISOU10696 | CG   | GLN | D | 73 | 8180    | 6580   | 6610   | 280  | 640   | 1280 | C0 |
| ATOM 10697  | CD   | GLN | D | 73 | -30.631 | 31.954 | 10.195 | 1.00 | 55.09 |      | C0 |
| ANISOU10697 | CD   | GLN | D | 73 | 8030    | 6270   | 6630   | 220  | 680   | 1090 | C0 |
| ATOM 10698  | OE1  | GLN | D | 73 | -30.759 | 31.003 | 10.970 | 1.00 | 53.13 |      | O0 |
| ANISOU10698 | OE1  | GLN | D | 73 | 7650    | 6150   | 6380   | 170  | 640   | 920  | O0 |
| ATOM 10699  | NE2  | GLN | D | 73 | -30.090 | 33.103 | 10.562 | 1.00 | 56.01 |      | N0 |
| ANISOU10699 | NE2  | GLN | D | 73 | 8290    | 6090   | 6900   | 220  | 770   | 1100 | N0 |
| ATOM 10700  | H    | GLN | D | 73 | -33.270 | 31.899 | 6.392  | 1.00 | 60.30 |      | H0 |
| ANISOU10700 | H    | GLN | D | 73 | 8610    | 7540   | 6760   | 590  | 440   | 1690 | H0 |
| ATOM 10701  | HA   | GLN | D | 73 | -31.284 | 29.956 | 6.561  | 1.00 | 55.70 |      | H0 |
| ANISOU10701 | HA   | GLN | D | 73 | 7980    | 7040   | 6140   | 140  | 520   | 1370 | H0 |
| ATOM 10702  | HB2  | GLN | D | 73 | -32.710 | 30.638 | 8.905  | 1.00 | 55.27 |      | H0 |
| ANISOU10702 | HB2  | GLN | D | 73 | 7820    | 6830   | 6350   | 390  | 480   | 1220 | H0 |
| ATOM 10703  | HB3  | GLN | D | 73 | -31.354 | 29.831 | 8.814  | 1.00 | 53.56 |      | H0 |
| ANISOU10703 | HB3  | GLN | D | 73 | 7620    | 6610   | 6120   | 150  | 540   | 1100 | H0 |
| ATOM 10704  | HG2  | GLN | D | 73 | -30.279 | 31.911 | 8.174  | 1.00 | 56.44 |      | H0 |
| ANISOU10704 | HG2  | GLN | D | 73 | 8270    | 6560   | 6610   | 170  | 690   | 1330 | H0 |
| ATOM 10705  | HG3  | GLN | D | 73 | -31.633 | 32.647 | 8.546  | 1.00 | 57.85 |      | H0 |
| ANISOU10705 | HG3  | GLN | D | 73 | 8440    | 6710   | 6830   | 420  | 630   | 1410 | H0 |
| ATOM 10706  | HE21 | GLN | D | 73 | -29.816 | 33.217 | 11.395 | 1.00 | 55.61 |      | H0 |
| ANISOU10706 | HE21 | GLN | D | 73 | 8250    | 5950   | 6940   | 190  | 790   | 980  | H0 |
| ATOM 10707  | HE22 | GLN | D | 73 | -30.002 | 33.759 | 9.976  | 1.00 | 57.54 |      | H0 |
| ANISOU10707 | HE22 | GLN | D | 73 | 8590    | 6180   | 7090   | 260  | 800   | 1230 | H0 |
| ATOM 10708  | N    | VAL | D | 74 | -32.967 | 28.061 | 7.056  | 1.00 | 52.36 |      | N0 |
| ANISOU10708 | N    | VAL | D | 74 | 7260    | 7040   | 5590   | 160  | 320   | 1180 | N0 |
| ATOM 10709  | CA   | VAL | D | 74 | -33.985 | 26.974 | 7.184  | 1.00 | 51.29 |      | C0 |
| ANISOU10709 | CA   | VAL | D | 74 | 6960    | 7160   | 5370   | 150  | 200   | 1100 | C0 |
| ATOM 10710  | C    | VAL | D | 74 | -33.515 | 25.977 | 8.247  | 1.00 | 48.50 |      | C0 |
| ANISOU10710 | C    | VAL | D | 74 | 6540    | 6780   | 5100   | 10   | 230   | 890  | C0 |
| ATOM 10711  | O    | VAL | D | 74 | -32.292 | 25.880 | 8.477  | 1.00 | 47.16 |      | O0 |
| ANISOU10711 | O    | VAL | D | 74 | 6460    | 6460   | 5000   | -110 | 320   | 810  | O0 |
| ATOM 10712  | CB   | VAL | D | 74 | -34.257 | 26.256 | 5.846  | 1.00 | 52.06 |      | C0 |
| ANISOU10712 | CB   | VAL | D | 74 | 7030    | 7510   | 5240   | 80   | 120   | 1150 | C0 |
| ATOM 10713  | CG1  | VAL | D | 74 | -35.105 | 27.107 | 4.909  | 1.00 | 54.58 |      | C0 |
| ANISOU10713 | CG1  | VAL | D | 74 | 7360    | 7940   | 5440   | 260  | 50    | 1370 | C0 |
| ATOM 10714  | CG2  | VAL | D | 74 | -32.973 | 25.811 | 5.161  | 1.00 | 51.57 |      | C0 |
| ANISOU10714 | CG2  | VAL | D | 74 | 7090    | 7400   | 5110   | -80  | 200   | 1100 | C0 |
| ATOM 10715  | H    | VAL | D | 74 | -32.111 | 27.764 | 7.151  | 1.00 | 51.54 |      | H0 |
| ANISOU10715 | H    | VAL | D | 74 | 7200    | 6870   | 5510   | 40   | 380   | 1110 | H0 |
| ATOM 10716  | HA   | VAL | D | 74 | -34.817 | 27.374 | 7.489  | 1.00 | 52.06 |      | H0 |
| ANISOU10716 | HA   | VAL | D | 74 | 6990    | 7290   | 5490   | 280  | 160   | 1150 | H0 |
| ATOM 10717  | HB   | VAL | D | 74 | -34.777 | 25.441 | 6.055  | 1.00 | 51.57 |      | H0 |

|                           |         |        |        |      |       |      |    |
|---------------------------|---------|--------|--------|------|-------|------|----|
| ANISOU10717 HB VAL D 74   | 6870    | 7590   | 5140   | 30   | 50    | 1060 | H0 |
| ATOM 10718 HG11 VAL D 74  | -35.901 | 27.410 | 5.378  | 1.00 | 55.04 |      | H0 |
| ANISOU10718 HG11 VAL D 74 | 7330    | 8030   | 5550   | 380  | 10    | 1400 | H0 |
| ATOM 10719 HG12 VAL D 74  | -35.366 | 26.577 | 4.136  | 1.00 | 55.17 |      | H0 |
| ANISOU10719 HG12 VAL D 74 | 7400    | 8200   | 5360   | 210  | -20   | 1380 | H0 |
| ATOM 10720 HG13 VAL D 74  | -34.590 | 27.878 | 4.614  | 1.00 | 55.28 |      | H0 |
| ANISOU10720 HG13 VAL D 74 | 7560    | 7890   | 5560   | 300  | 120   | 1470 | H0 |
| ATOM 10721 HG21 VAL D 74  | -32.438 | 26.591 | 4.933  | 1.00 | 52.19 |      | H0 |
| ANISOU10721 HG21 VAL D 74 | 7260    | 7340   | 5220   | -50  | 270   | 1190 | H0 |
| ATOM 10722 HG22 VAL D 74  | -33.191 | 25.321 | 4.350  | 1.00 | 52.22 |      | H0 |
| ANISOU10722 HG22 VAL D 74 | 7160    | 7640   | 5040   | -120 | 140   | 1120 | H0 |
| ATOM 10723 HG23 VAL D 74  | -32.466 | 25.235 | 5.760  | 1.00 | 50.10 |      | H0 |
| ANISOU10723 HG23 VAL D 74 | 6890    | 7150   | 5000   | -170 | 240   | 970  | H0 |
| ATOM 10724 N SER D 75     | -34.464 | 25.269 | 8.865  | 1.00 | 47.29 |      | N0 |
| ANISOU10724 N SER D 75    | 6240    | 6780   | 4950   | 20   | 150   | 810  | N0 |
| ATOM 10725 CA SER D 75    | -34.216 | 24.084 | 9.723  | 1.00 | 45.06 |      | C0 |
| ANISOU10725 CA SER D 75   | 5890    | 6520   | 4710   | -130 | 160   | 630  | C0 |
| ATOM 10726 C SER D 75     | -34.228 | 22.840 | 8.836  | 1.00 | 44.51 |      | C0 |
| ANISOU10726 C SER D 75    | 5800    | 6620   | 4490   | -270 | 100   | 570  | C0 |
| ATOM 10727 O SER D 75     | -35.179 | 22.695 | 8.048  | 1.00 | 45.91 |      | O0 |
| ANISOU10727 O SER D 75    | 5910    | 7000   | 4540   | -250 | -10   | 650  | O0 |
| ATOM 10728 CB SER D 75    | -35.232 | 23.986 | 10.828 | 1.00 | 45.03 |      | C0 |
| ANISOU10728 CB SER D 75   | 5740    | 6590   | 4780   | -50  | 120   | 590  | C0 |
| ATOM 10729 OG SER D 75    | -35.121 | 25.095 | 11.702 | 1.00 | 45.58 |      | O0 |
| ANISOU10729 OG SER D 75   | 5850    | 6480   | 4980   | 80   | 190   | 610  | O0 |
| ATOM 10730 H SER D 75     | -35.351 | 25.467 | 8.800  | 1.00 | 48.29 |      | H0 |
| ANISOU10730 H SER D 75    | 6290    | 7010   | 5040   | 110  | 90    | 870  | H0 |
| ATOM 10731 HA SER D 75    | -33.313 | 24.176 | 10.128 | 1.00 | 44.19 |      | H0 |
| ANISOU10731 HA SER D 75   | 5850    | 6260   | 4680   | -180 | 230   | 570  | H0 |
| ATOM 10732 HB2 SER D 75   | -36.136 | 23.958 | 10.441 | 1.00 | 46.13 |      | H0 |
| ANISOU10732 HB2 SER D 75  | 5800    | 6880   | 4850   | 0    | 40    | 660  | H0 |
| ATOM 10733 HB3 SER D 75   | -35.087 | 23.153 | 11.333 | 1.00 | 44.02 |      | H0 |
| ANISOU10733 HB3 SER D 75  | 5570    | 6480   | 4670   | -150 | 120   | 490  | H0 |
| ATOM 10734 N VAL D 76     | -33.217 | 21.982 | 8.968  | 1.00 | 43.03 |      | N0 |
| ANISOU10734 N VAL D 76    | 5660    | 6360   | 4320   | -420 | 150   | 450  | N0 |
| ATOM 10735 CA VAL D 76    | -32.975 | 20.825 | 8.057  | 1.00 | 43.32 |      | C0 |
| ANISOU10735 CA VAL D 76   | 5730    | 6510   | 4220   | -560 | 120   | 370  | C0 |
| ATOM 10736 C VAL D 76     | -32.706 | 19.584 | 8.899  | 1.00 | 41.66 |      | C0 |
| ANISOU10736 C VAL D 76    | 5480    | 6270   | 4080   | -680 | 140   | 210  | C0 |
| ATOM 10737 O VAL D 76     | -31.895 | 19.633 | 9.819  | 1.00 | 40.67 |      | O0 |
| ANISOU10737 O VAL D 76    | 5380    | 5990   | 4080   | -680 | 220   | 160  | O0 |
| ATOM 10738 CB VAL D 76    | -31.804 | 21.115 | 7.098  | 1.00 | 43.69 |      | C0 |
| ANISOU10738 CB VAL D 76   | 5910    | 6480   | 4200   | -590 | 210   | 410  | C0 |
| ATOM 10739 CG1 VAL D 76   | -31.499 | 19.928 | 6.194  | 1.00 | 44.00 |      | C0 |
| ANISOU10739 CG1 VAL D 76  | 6000    | 6630   | 4090   | -710 | 190   | 310  | C0 |
| ATOM 10740 CG2 VAL D 76   | -32.059 | 22.369 | 6.272  | 1.00 | 45.40 |      | C0 |
| ANISOU10740 CG2 VAL D 76  | 6180    | 6720   | 4350   | -470 | 200   | 590  | C0 |
| ATOM 10741 H VAL D 76     | -32.599 | 22.052 | 9.634  | 1.00 | 42.18 |      | H0 |
| ANISOU10741 H VAL D 76    | 5580    | 6130   | 4310   | -440 | 220   | 400  | H0 |
| ATOM 10742 HA VAL D 76    | -33.778 | 20.678 | 7.529  | 1.00 | 44.24 |      | H0 |
| ANISOU10742 HA VAL D 76   | 5790    | 6770   | 4240   | -550 | 40    | 410  | H0 |
| ATOM 10743 HB VAL D 76    | -31.003 | 21.281 | 7.655  | 1.00 | 42.81 |      | H0 |
| ANISOU10743 HB VAL D 76   | 5840    | 6240   | 4190   | -600 | 290   | 370  | H0 |
| ATOM 10744 HG11 VAL D 76  | -31.045 | 19.238 | 6.705  | 1.00 | 43.00 |      | H0 |

|             |       |       |       |      |         |        |        |      |       |    |
|-------------|-------|-------|-------|------|---------|--------|--------|------|-------|----|
| ANISOU10744 | HG11  | VAL D | 76    | 5870 | 6440    | 4030   | -780   | 230  | 200   | H0 |
| ATOM        | 10745 | HG12  | VAL D | 76   | -30.927 | 20.216 | 5.462  | 1.00 | 44.58 | H0 |
| ANISOU10745 | HG12  | VAL D | 76    | 6150 | 6700    | 4100   | -710   | 240  | 350   | H0 |
| ATOM        | 10746 | HG13  | VAL D | 76   | -32.329 | 19.572 | 5.834  | 1.00 | 44.75 | H0 |
| ANISOU10746 | HG13  | VAL D | 76    | 6040 | 6860    | 4100   | -730   | 100  | 310   | H0 |
| ATOM        | 10747 | HG21  | VAL D | 76   | -32.916 | 22.290 | 5.818  | 1.00 | 46.36 | H0 |
| ANISOU10747 | HG21  | VAL D | 76    | 6250 | 6980    | 4380   | -440   | 110  | 640   | H0 |
| ATOM        | 10748 | HG22  | VAL D | 76   | -31.352 | 22.475 | 5.613  | 1.00 | 45.74 | H0 |
| ANISOU10748 | HG22  | VAL D | 76    | 6310 | 6740    | 4330   | -500   | 250  | 620   | H0 |
| ATOM        | 10749 | HG23  | VAL D | 76   | -32.074 | 23.147 | 6.857  | 1.00 | 45.27 | H0 |
| ANISOU10749 | HG23  | VAL D | 76    | 6170 | 6590    | 4440   | -390   | 230  | 640   | H0 |
| ATOM        | 10750 | N     | PROD  | 77   | -33.362 | 18.437 | 8.611  | 1.00 | 42.19 | N0 |
| ANISOU10750 | N     | PROD  | 77    | 5500 | 6470    | 4060   | -780   | 60   | 140   | N0 |
| ATOM        | 10751 | CA    | PROD  | 77   | -33.039 | 17.188 | 9.300  | 1.00 | 41.37 | C0 |
| ANISOU10751 | CA    | PROD  | 77    | 5390 | 6310    | 4020   | -900   | 80   | 0     | C0 |
| ATOM        | 10752 | C     | PROD  | 77   | -31.589 | 16.798 | 8.981  | 1.00 | 41.27 | C0 |
| ANISOU10752 | C     | PROD  | 77    | 5510 | 6170    | 4010   | -950   | 190  | -80   | C0 |
| ATOM        | 10753 | O     | PROD  | 77   | -31.179 | 16.965 | 7.850  | 1.00 | 41.48 | O0 |
| ANISOU10753 | O     | PROD  | 77    | 5610 | 6230    | 3920   | -950   | 200  | -50   | O0 |
| ATOM        | 10754 | CB    | PROD  | 77   | -34.064 | 16.180 | 8.760  | 1.00 | 42.28 | C0 |
| ANISOU10754 | CB    | PROD  | 77    | 5450 | 6600    | 4020   | -1020  | -30  | -50   | C0 |
| ATOM        | 10755 | CG    | PROD  | 77   | -34.499 | 16.765 | 7.428  | 1.00 | 43.98 | C0 |
| ANISOU10755 | CG    | PROD  | 77    | 5680 | 6960    | 4070   | -980   | -100 | 40    | C0 |
| ATOM        | 10756 | CD    | PROD  | 77   | -34.427 | 18.267 | 7.608  | 1.00 | 43.79 | C0 |
| ANISOU10756 | CD    | PROD  | 77    | 5650 | 6890    | 4100   | -800   | -60  | 190   | C0 |
| ATOM        | 10757 | HA    | PROD  | 77   | -33.161 | 17.301 | 10.275 | 1.00 | 40.66 | H0 |
| ANISOU10757 | HA    | PROD  | 77    | 5240 | 6170    | 4030   | -870   | 100  | 0     | H0 |
| ATOM        | 10758 | HB2   | PROD  | 77   | -33.657 | 15.295 | 8.636  | 1.00 | 42.18 | H0 |
| ANISOU10758 | HB2   | PROD  | 77    | 5490 | 6540    | 4000   | -1110  | -10  | -150  | H0 |
| ATOM        | 10759 | HB3   | PROD  | 77   | -34.828 | 16.095 | 9.369  | 1.00 | 42.38 | H0 |
| ANISOU10759 | HB3   | PROD  | 77    | 5360 | 6660    | 4080   | -1020  | -80  | -40   | H0 |
| ATOM        | 10760 | HG2   | PROD  | 77   | -33.901 | 16.474 | 6.710  | 1.00 | 44.21 | H0 |
| ANISOU10760 | HG2   | PROD  | 77    | 5800 | 6980    | 4020   | -1020  | -80  | -10   | H0 |
| ATOM        | 10761 | HG3   | PROD  | 77   | -35.411 | 16.486 | 7.210  | 1.00 | 44.91 | H0 |
| ANISOU10761 | HG3   | PROD  | 77    | 5710 | 7230    | 4120   | -1020  | -200 | 40    | H0 |
| ATOM        | 10762 | HD2   | PROD  | 77   | -34.196 | 18.707 | 6.770  | 1.00 | 44.63 | H0 |
| ANISOU10762 | HD2   | PROD  | 77    | 5810 | 7020    | 4120   | -770   | -60  | 250   | H0 |
| ATOM        | 10763 | HD3   | PROD  | 77   | -35.274 | 18.624 | 7.933  | 1.00 | 44.29 | H0 |
| ANISOU10763 | HD3   | PROD  | 77    | 5610 | 7030    | 4190   | -740   | -120 | 240   | H0 |
| ATOM        | 10764 | N     | ILED  | 78   | -30.847 | 16.311 | 9.979  | 1.00 | 40.72 | N0 |
| ANISOU10764 | N     | ILED  | 78    | 5440 | 5970    | 4060   | -970   | 260  | -150  | N0 |
| ATOM        | 10765 | CA    | ILED  | 78   | -29.381 | 16.054 | 9.856  | 1.00 | 41.15 | C0 |
| ANISOU10765 | CA    | ILED  | 78    | 5590 | 5910    | 4140   | -990   | 370  | -210  | C0 |
| ATOM        | 10766 | C     | ILED  | 78   | -29.123 | 14.904 | 8.872  | 1.00 | 42.16 | C0 |
| ANISOU10766 | C     | ILED  | 78    | 5800 | 6070    | 4150   | -1070  | 370  | -310  | C0 |
| ATOM        | 10767 | O     | ILED  | 78   | -27.988 | 14.832 | 8.374  | 1.00 | 41.79 | O0 |
| ANISOU10767 | O     | ILED  | 78    | 5830 | 5970    | 4080   | -1060  | 460  | -340  | O0 |
| ATOM        | 10768 | CB    | ILED  | 78   | -28.724 | 15.791 | 11.223 | 1.00 | 39.98 | C0 |
| ANISOU10768 | CB    | ILED  | 78    | 5410 | 5640    | 4150   | -980   | 430  | -260  | C0 |
| ATOM        | 10769 | CG1   | ILED  | 78   | -29.257 | 14.521 | 11.890 | 1.00 | 40.21 | C0 |
| ANISOU10769 | CG1   | ILED  | 78    | 5400 | 5670    | 4210   | -1050  | 390  | -340  | C0 |
| ATOM        | 10770 | CG2   | ILED  | 78   | -28.854 | 17.012 | 12.117 | 1.00 | 39.72 | C0 |
| ANISOU10770 | CG2   | ILED  | 78    | 5310 | 5570    | 4210   | -890   | 430  | -190  | C0 |
| ATOM        | 10771 | CD1   | ILED  | 78   | -28.424 | 14.058 | 13.061 | 1.00 | 39.94 | C0 |

|             |               |         |        |        |       |       |      |    |
|-------------|---------------|---------|--------|--------|-------|-------|------|----|
| ANISOU10771 | CD1 ILE D 78  | 5350    | 5530   | 4290   | -1030 | 450   | -380 | C0 |
| ATOM 10772  | H ILE D 78    | -31.194 | 16.108 | 10.796 | 1.00  | 40.29 |      | H0 |
| ANISOU10772 | H ILE D 78    | 5330    | 5900   | 4080   | -970  | 240   | -170 | H0 |
| ATOM 10773  | HA ILE D 78   | -28.974 | 16.857 | 9.485  | 1.00  | 41.24 |      | H0 |
| ANISOU10773 | HA ILE D 78   | 5630    | 5900   | 4140   | -940  | 400   | -150 | H0 |
| ATOM 10774  | HB ILE D 78   | -27.761 | 15.648 | 11.059 | 1.00  | 39.92 |      | H0 |
| ANISOU10774 | HB ILE D 78   | 5450    | 5580   | 4150   | -980  | 490   | -290 | H0 |
| ATOM 10775  | HG12 ILE D 78 | -30.172 | 14.687 | 12.201 | 1.00  | 40.42 |      | H0 |
| ANISOU10775 | HG12 ILE D 78 | 5360    | 5760   | 4240   | -1040 | 330   | -300 | H0 |
| ATOM 10776  | HG13 ILE D 78 | -29.291 | 13.801 | 11.225 | 1.00  | 40.87 |      | H0 |
| ANISOU10776 | HG13 ILE D 78 | 5530    | 5780   | 4220   | -1100 | 370   | -390 | H0 |
| ATOM 10777  | HG21 ILE D 78 | -28.598 | 17.809 | 11.621 | 1.00  | 40.04 |      | H0 |
| ANISOU10777 | HG21 ILE D 78 | 5390    | 5590   | 4230   | -860  | 460   | -130 | H0 |
| ATOM 10778  | HG22 ILE D 78 | -28.272 | 16.913 | 12.889 | 1.00  | 38.95 |      | H0 |
| ANISOU10778 | HG22 ILE D 78 | 5200    | 5400   | 4190   | -890  | 480   | -220 | H0 |
| ATOM 10779  | HG23 ILE D 78 | -29.775 | 17.101 | 12.417 | 1.00  | 39.80 |      | H0 |
| ANISOU10779 | HG23 ILE D 78 | 5270    | 5630   | 4220   | -870  | 380   | -160 | H0 |
| ATOM 10780  | HD11 ILE D 78 | -27.493 | 13.977 | 12.787 | 1.00  | 39.63 |      | H0 |
| ANISOU10780 | HD11 ILE D 78 | 5360    | 5440   | 4250   | -1020 | 510   | -410 | H0 |
| ATOM 10781  | HD12 ILE D 78 | -28.746 | 13.193 | 13.368 | 1.00  | 39.76 |      | H0 |
| ANISOU10781 | HD12 ILE D 78 | 5330    | 5500   | 4280   | -1080 | 430   | -420 | H0 |
| ATOM 10782  | HD13 ILE D 78 | -28.492 | 14.704 | 13.786 | 1.00  | 39.21 |      | H0 |
| ANISOU10782 | HD13 ILE D 78 | 5210    | 5430   | 4260   | -990  | 460   | -340 | H0 |
| ATOM 10783  | N SER D 79    | -30.112 | 14.040 | 8.605  | 1.00  | 43.89 |      | N0 |
| ANISOU10783 | N SER D 79    | 6000    | 6370   | 4300   | -1160 | 280   | -360 | N0 |
| ATOM 10784  | CA SER D 79   | -30.003 | 12.934 | 7.611  | 1.00  | 45.97 |      | C0 |
| ANISOU10784 | CA SER D 79   | 6370    | 6660   | 4440   | -1250 | 260   | -480 | C0 |
| ATOM 10785  | C SER D 79    | -29.902 | 13.490 | 6.181  | 1.00  | 47.55 |      | C0 |
| ANISOU10785 | C SER D 79    | 6630    | 6980   | 4450   | -1230 | 260   | -440 | C0 |
| ATOM 10786  | O SER D 79    | -29.405 | 12.754 | 5.311  | 1.00  | 48.91 |      | O0 |
| ANISOU10786 | O SER D 79    | 6910    | 7160   | 4510   | -1280 | 290   | -540 | O0 |
| ATOM 10787  | CB SER D 79   | -31.136 | 11.953 | 7.744  | 1.00  | 47.26 |      | C0 |
| ANISOU10787 | CB SER D 79   | 6490    | 6880   | 4580   | -1370 | 160   | -550 | C0 |
| ATOM 10788  | OG SER D 79   | -32.330 | 12.476 | 7.187  | 1.00  | 49.44 |      | O0 |
| ANISOU10788 | OG SER D 79   | 6690    | 7350   | 4750   | -1390 | 40    | -480 | O0 |
| ATOM 10789  | H SER D 79    | -30.921 | 14.055 | 9.022  | 1.00  | 43.88 |      | H0 |
| ANISOU10789 | H SER D 79    | 5930    | 6420   | 4320   | -1170 | 210   | -340 | H0 |
| ATOM 10790  | HA SER D 79   | -29.156 | 12.447 | 7.803  | 1.00  | 45.52 |      | H0 |
| ANISOU10790 | HA SER D 79   | 6370    | 6510   | 4420   | -1250 | 340   | -540 | H0 |
| ATOM 10791  | HB2 SER D 79  | -30.899 | 11.116 | 7.283  | 1.00  | 48.05 |      | H0 |
| ANISOU10791 | HB2 SER D 79  | 6680    | 6950   | 4630   | -1440 | 170   | -650 | H0 |
| ATOM 10792  | HB3 SER D 79  | -31.281 | 11.747 | 8.695  | 1.00  | 46.60 |      | H0 |
| ANISOU10792 | HB3 SER D 79  | 6360    | 6740   | 4610   | -1370 | 170   | -540 | H0 |
| ATOM 10793  | N SER D 80    | -30.340 | 14.735 | 5.943  | 1.00  | 47.89 |      | N0 |
| ANISOU10793 | N SER D 80    | 6620    | 7110   | 4470   | -1150 | 220   | -290 | N0 |
| ATOM 10794  | CA SER D 80   | -30.242 | 15.439 | 4.633  | 1.00  | 49.42 |      | C0 |
| ANISOU10794 | CA SER D 80   | 6870    | 7420   | 4490   | -1110 | 220   | -210 | C0 |
| ATOM 10795  | C SER D 80    | -28.873 | 16.118 | 4.469  | 1.00  | 48.72 |      | C0 |
| ANISOU10795 | C SER D 80    | 6860    | 7230   | 4430   | -1050 | 360   | -160 | C0 |
| ATOM 10796  | O SER D 80    | -28.621 | 16.650 | 3.383  | 1.00  | 49.85 |      | O0 |
| ANISOU10796 | O SER D 80    | 7060    | 7450   | 4430   | -1020 | 390   | -80  | O0 |
| ATOM 10797  | CB SER D 80   | -31.356 | 16.444 | 4.466  | 1.00  | 50.59 |      | C0 |
| ANISOU10797 | CB SER D 80   | 6940    | 7690   | 4590   | -1040 | 110   | -60  | C0 |
| ATOM 10798  | OG SER D 80   | -32.605 | 15.797 | 4.264  | 1.00  | 52.31 |      | O0 |

|             |      |          |         |        |       |       |       |      |    |
|-------------|------|----------|---------|--------|-------|-------|-------|------|----|
| ANISOU10798 | OG   | SER D 80 | 7080    | 8070   | 4730  | -1120 | -30   | -100 | O0 |
| ATOM 10799  | H    | SER D 80 | -30.748 | 15.246 | 6.576 | 1.00  | 47.38 |      | H0 |
| ANISOU10799 | H    | SER D 80 | 6480    | 7040   | 4480  | -1110 | 200   | -230 | H0 |
| ATOM 10800  | HA   | SER D 80 | -30.332 | 14.756 | 3.914 | 1.00  | 50.38 |      | H0 |
| ANISOU10800 | HA   | SER D 80 | 7050    | 7610   | 4480  | -1180 | 190   | -290 | H0 |
| ATOM 10801  | HB2  | SER D 80 | -31.407 | 17.012 | 5.267 | 1.00  | 49.78 |      | H0 |
| ANISOU10801 | HB2  | SER D 80 | 6780    | 7520   | 4620  | -980  | 130   | 0    | H0 |
| ATOM 10802  | HB3  | SER D 80 | -31.161 | 17.023 | 3.695 | 1.00  | 51.51 |      | H0 |
| ANISOU10802 | HB3  | SER D 80 | 7100    | 7860   | 4610  | -1000 | 130   | 20   | H0 |
| ATOM 10803  | N    | LEU D 81 | -28.025 | 16.106 | 5.503 | 1.00  | 47.30 |      | N0 |
| ANISOU10803 | N    | LEU D 81 | 6660    | 6890   | 4430  | -1030 | 450   | -190 | N0 |
| ATOM 10804  | CA   | LEU D 81 | -26.752 | 16.878 | 5.558 | 1.00  | 46.48 |      | C0 |
| ANISOU10804 | CA   | LEU D 81 | 6580    | 6690   | 4390  | -990  | 580   | -130 | C0 |
| ATOM 10805  | C    | LEU D 81 | -25.571 | 15.954 | 5.862 | 1.00  | 44.92 |      | C0 |
| ANISOU10805 | C    | LEU D 81 | 6410    | 6410   | 4250  | -1010 | 690   | -250 | C0 |
| ATOM 10806  | O    | LEU D 81 | -25.780 | 14.897 | 6.484 | 1.00  | 44.08 |      | O0 |
| ANISOU10806 | O    | LEU D 81 | 6290    | 6260   | 4200  | -1040 | 660   | -360 | O0 |
| ATOM 10807  | CB   | LEU D 81 | -26.860 | 17.922 | 6.675 | 1.00  | 45.95 |      | C0 |
| ANISOU10807 | CB   | LEU D 81 | 6440    | 6520   | 4490  | -930  | 580   | -40  | C0 |
| ATOM 10808  | CG   | LEU D 81 | -27.858 | 19.053 | 6.456 | 1.00  | 46.98 |      | C0 |
| ANISOU10808 | CG   | LEU D 81 | 6550    | 6700   | 4600  | -860  | 510   | 110  | C0 |
| ATOM 10809  | CD1  | LEU D 81 | -27.778 | 20.046 | 7.604 | 1.00  | 46.16 |      | C0 |
| ANISOU10809 | CD1  | LEU D 81 | 6400    | 6460   | 4670  | -800  | 530   | 160  | C0 |
| ATOM 10810  | CD2  | LEU D 81 | -27.617 | 19.752 | 5.124 | 1.00  | 48.56 |      | C0 |
| ANISOU10810 | CD2  | LEU D 81 | 6830    | 6970   | 4650  | -840  | 540   | 230  | C0 |
| ATOM 10811  | H    | LEU D 81 | -28.174 | 15.615 | 6.252 | 1.00  | 46.42 |      | H0 |
| ANISOU10811 | H    | LEU D 81 | 6510    | 6730   | 4400  | -1050 | 440   | -250 | H0 |
| ATOM 10812  | HA   | LEU D 81 | -26.603 | 17.321 | 4.692 | 1.00  | 47.45 |      | H0 |
| ANISOU10812 | HA   | LEU D 81 | 6750    | 6870   | 4410  | -970  | 610   | -60  | H0 |
| ATOM 10813  | HB2  | LEU D 81 | -27.100 | 17.458 | 7.502 | 1.00  | 45.06 |      | H0 |
| ANISOU10813 | HB2  | LEU D 81 | 6280    | 6370   | 4470  | -940  | 560   | -100 | H0 |
| ATOM 10814  | HB3  | LEU D 81 | -25.975 | 18.317 | 6.809 | 1.00  | 45.68 |      | H0 |
| ANISOU10814 | HB3  | LEU D 81 | 6420    | 6420   | 4520  | -920  | 670   | -20  | H0 |
| ATOM 10815  | HG   | LEU D 81 | -28.768 | 18.666 | 6.443 | 1.00  | 47.13 |      | H0 |
| ANISOU10815 | HG   | LEU D 81 | 6530    | 6800   | 4570  | -870  | 420   | 90   | H0 |
| ATOM 10816  | HD11 | LEU D 81 | -27.938 | 19.584 | 8.445 | 1.00  | 45.26 |      | H0 |
| ANISOU10816 | HD11 | LEU D 81 | 6240    | 6320   | 4640  | -810  | 510   | 90   | H0 |
| ATOM 10817  | HD12 | LEU D 81 | -28.451 | 20.739 | 7.483 | 1.00  | 46.76 |      | H0 |
| ANISOU10817 | HD12 | LEU D 81 | 6470    | 6560   | 4740  | -740  | 490   | 250  | H0 |
| ATOM 10818  | HD13 | LEU D 81 | -26.894 | 20.453 | 7.621 | 1.00  | 46.09 |      | H0 |
| ANISOU10818 | HD13 | LEU D 81 | 6430    | 6380   | 4710  | -810  | 610   | 180  | H0 |
| ATOM 10819  | HD21 | LEU D 81 | -26.661 | 19.874 | 4.990 | 1.00  | 48.51 |      | H0 |
| ANISOU10819 | HD21 | LEU D 81 | 6860    | 6910   | 4660  | -860  | 630   | 230  | H0 |
| ATOM 10820  | HD22 | LEU D 81 | -28.056 | 20.620 | 5.128 | 1.00  | 49.01 |      | H0 |
| ANISOU10820 | HD22 | LEU D 81 | 6880    | 7020   | 4720  | -780  | 510   | 340  | H0 |
| ATOM 10821  | HD23 | LEU D 81 | -27.979 | 19.210 | 4.402 | 1.00  | 49.31 |      | H0 |
| ANISOU10821 | HD23 | LEU D 81 | 6950    | 7180   | 4610  | -870  | 490   | 200  | H0 |
| ATOM 10822  | N    | TRP D 82 | -24.362 | 16.382 | 5.499 | 1.00  | 44.42 |      | N0 |
| ANISOU10822 | N    | TRP D 82 | 6370    | 6330   | 4180  | -990  | 810   | -220 | N0 |
| ATOM 10823  | CA   | TRP D 82 | -23.115 | 15.864 | 6.114 | 1.00  | 43.45 |      | C0 |
| ANISOU10823 | CA   | TRP D 82 | 6220    | 6120   | 4160  | -990  | 920   | -300 | C0 |
| ATOM 10824  | C    | TRP D 82 | -22.976 | 16.485 | 7.505 | 1.00  | 42.11 |      | C0 |
| ANISOU10824 | C    | TRP D 82 | 5960    | 5850   | 4190  | -970  | 910   | -260 | C0 |
| ATOM 10825  | O    | TRP D 82 | -23.154 | 17.708 | 7.633 | 1.00  | 42.18 |      | O0 |

|             |     |          |         |        |        |       |       |      |    |
|-------------|-----|----------|---------|--------|--------|-------|-------|------|----|
| ANISOU10825 | O   | TRP D 82 | 5950    | 5830   | 4240   | -960  | 900   | -140 | O0 |
| ATOM 10826  | CB  | TRP D 82 | -21.877 | 16.141 | 5.258  | 1.00  | 44.17 |      | C0 |
| ANISOU10826 | CB  | TRP D 82 | 6350    | 6250   | 4180   | -980  | 1060  | -270 | C0 |
| ATOM 10827  | CG  | TRP D 82 | -20.614 | 15.680 | 5.918  | 1.00  | 43.64 |      | C0 |
| ANISOU10827 | CG  | TRP D 82 | 6220    | 6130   | 4230   | -960  | 1160  | -330 | C0 |
| ATOM 10828  | CD1 | TRP D 82 | -20.051 | 14.439 | 5.847  | 1.00  | 43.82 |      | C0 |
| ANISOU10828 | CD1 | TRP D 82 | 6270    | 6150   | 4230   | -930  | 1220  | -460 | C0 |
| ATOM 10829  | CD2 | TRP D 82 | -19.772 | 16.450 | 6.794  | 1.00  | 43.07 |      | C0 |
| ANISOU10829 | CD2 | TRP D 82 | 6050    | 6000   | 4310   | -970  | 1220  | -270 | C0 |
| ATOM 10830  | NE1 | TRP D 82 | -18.906 | 14.392 | 6.596  | 1.00  | 43.39 |      | N0 |
| ANISOU10830 | NE1 | TRP D 82 | 6120    | 6060   | 4300   | -900  | 1300  | -470 | N0 |
| ATOM 10831  | CE2 | TRP D 82 | -18.710 | 15.610 | 7.189  | 1.00  | 42.96 |      | C0 |
| ANISOU10831 | CE2 | TRP D 82 | 5990    | 5980   | 4350   | -930  | 1300  | -360 | C0 |
| ATOM 10832  | CE3 | TRP D 82 | -19.809 | 17.763 | 7.276  | 1.00  | 43.10 |      | C0 |
| ANISOU10832 | CE3 | TRP D 82 | 6020    | 5950   | 4410   | -990  | 1200  | -160 | C0 |
| ATOM 10833  | CZ2 | TRP D 82 | -17.697 | 16.044 | 8.043  | 1.00  | 43.03 |      | C0 |
| ANISOU10833 | CZ2 | TRP D 82 | 5890    | 5970   | 4500   | -940  | 1350  | -340 | C0 |
| ATOM 10834  | CZ3 | TRP D 82 | -18.802 | 18.195 | 8.113  | 1.00  | 43.06 |      | C0 |
| ANISOU10834 | CZ3 | TRP D 82 | 5920    | 5900   | 4540   | -1020 | 1260  | -160 | C0 |
| ATOM 10835  | CH2 | TRP D 82 | -17.763 | 17.344 | 8.493  | 1.00  | 42.86 |      | C0 |
| ANISOU10835 | CH2 | TRP D 82 | 5820    | 5900   | 4560   | -990  | 1330  | -240 | C0 |
| ATOM 10836  | H   | TRP D 82 | -24.225 | 17.015 | 4.858  | 1.00  | 45.28 |      | H0 |
| ANISOU10836 | H   | TRP D 82 | 6510    | 6480   | 4220   | -980  | 840   | -140 | H0 |
| ATOM 10837  | HA  | TRP D 82 | -23.206 | 14.888 | 6.208  | 1.00  | 43.41 |      | H0 |
| ANISOU10837 | HA  | TRP D 82 | 6240    | 6110   | 4150   | -1000 | 910   | -400 | H0 |
| ATOM 10838  | HB2 | TRP D 82 | -21.981 | 15.684 | 4.398  | 1.00  | 45.18 |      | H0 |
| ANISOU10838 | HB2 | TRP D 82 | 6540    | 6450   | 4170   | -980  | 1060  | -300 | H0 |
| ATOM 10839  | HB3 | TRP D 82 | -21.823 | 17.103 | 5.087  | 1.00  | 44.50 |      | H0 |
| ANISOU10839 | HB3 | TRP D 82 | 6380    | 6300   | 4230   | -980  | 1070  | -160 | H0 |
| ATOM 10840  | HD1 | TRP D 82 | -20.386 | 13.718 | 5.337  | 1.00  | 44.47 |      | H0 |
| ANISOU10840 | HD1 | TRP D 82 | 6420    | 6260   | 4220   | -930  | 1200  | -530 | H0 |
| ATOM 10841  | HE1 | TRP D 82 | -18.385 | 13.696 | 6.679  | 1.00  | 43.70 |      | H0 |
| ANISOU10841 | HE1 | TRP D 82 | 6160    | 6090   | 4350   | -860  | 1350  | -530 | H0 |
| ATOM 10842  | HE3 | TRP D 82 | -20.506 | 18.346 | 7.022  | 1.00  | 43.25 |      | H0 |
| ANISOU10842 | HE3 | TRP D 82 | 6070    | 5960   | 4400   | -1000 | 1150  | -100 | H0 |
| ATOM 10843  | HZ2 | TRP D 82 | -16.994 | 15.470 | 8.297  | 1.00  | 43.03 |      | H0 |
| ANISOU10843 | HZ2 | TRP D 82 | 5840    | 5980   | 4530   | -900  | 1410  | -390 | H0 |
| ATOM 10844  | HZ3 | TRP D 82 | -18.819 | 19.080 | 8.442  | 1.00  | 42.87 |      | H0 |
| ANISOU10844 | HZ3 | TRP D 82 | 5880    | 5820   | 4590   | -1050 | 1250  | -90  | H0 |
| ATOM 10845  | HH2 | TRP D 82 | -17.091 | 17.665 | 9.069  | 1.00  | 42.71 |      | H0 |
| ANISOU10845 | HH2 | TRP D 82 | 5730    | 5870   | 4630   | -1010 | 1360  | -230 | H0 |
| ATOM 10846  | N   | VAL D 83 | -22.670 | 15.657 | 8.499  | 1.00  | 41.48 |      | N0 |
| ANISOU10846 | N   | VAL D 83 | 5840    | 5710   | 4210   | -970  | 920   | -350 | N0 |
| ATOM 10847  | CA  | VAL D 83 | -22.461 | 16.067 | 9.915  | 1.00  | 41.17 |      | C0 |
| ANISOU10847 | CA  | VAL D 83 | 5710    | 5590   | 4340   | -950  | 910   | -330 | C0 |
| ATOM 10848  | C   | VAL D 83 | -21.125 | 15.480 | 10.354 | 1.00  | 40.78 |      | C0 |
| ANISOU10848 | C   | VAL D 83 | 5620    | 5520   | 4360   | -940  | 1000  | -390 | C0 |
| ATOM 10849  | O   | VAL D 83 | -20.832 | 14.325 | 10.050 | 1.00  | 40.87 |      | O0 |
| ANISOU10849 | O   | VAL D 83 | 5670    | 5530   | 4320   | -920  | 1030  | -480 | O0 |
| ATOM 10850  | CB  | VAL D 83 | -23.638 | 15.585 | 10.791 | 1.00  | 40.97 |      | C0 |
| ANISOU10850 | CB  | VAL D 83 | 5660    | 5550   | 4360   | -950  | 800   | -360 | C0 |
| ATOM 10851  | CG1 | VAL D 83 | -23.378 | 15.775 | 12.277 | 1.00  | 40.55 |      | C0 |
| ANISOU10851 | CG1 | VAL D 83 | 5520    | 5440   | 4450   | -930  | 800   | -370 | C0 |
| ATOM 10852  | CG2 | VAL D 83 | -24.930 | 16.273 | 10.385 | 1.00  | 41.37 |      | C0 |

|             |               |         |        |        |       |       |      |    |
|-------------|---------------|---------|--------|--------|-------|-------|------|----|
| ANISOU10852 | CG2 VAL D 83  | 5720    | 5650   | 4350   | -950  | 710   | -290 | C0 |
| ATOM 10853  | H VAL D 83    | -22.570 | 14.761 | 8.370  | 1.00  | 41.77 |      | H0 |
| ANISOU10853 | H VAL D 83    | 5900    | 5740   | 4220   | -970  | 930   | -420 | H0 |
| ATOM 10854  | HA VAL D 83   | -22.413 | 17.037 | 9.956  | 1.00  | 41.13 |      | H0 |
| ANISOU10854 | HA VAL D 83   | 5690    | 5570   | 4360   | -950  | 910   | -260 | H0 |
| ATOM 10855  | HB VAL D 83   | -23.749 | 14.616 | 10.626 | 1.00  | 41.14 |      | H0 |
| ANISOU10855 | HB VAL D 83   | 5710    | 5570   | 4350   | -970  | 790   | -430 | H0 |
| ATOM 10856  | HG11 VAL D 83 | -22.726 | 15.120 | 12.581 | 1.00  | 40.25 |      | H0 |
| ANISOU10856 | HG11 VAL D 83 | 5470    | 5380   | 4440   | -920  | 840   | -420 | H0 |
| ATOM 10857  | HG12 VAL D 83 | -24.208 | 15.655 | 12.771 | 1.00  | 40.03 |      | H0 |
| ANISOU10857 | HG12 VAL D 83 | 5430    | 5370   | 4400   | -930  | 730   | -370 | H0 |
| ATOM 10858  | HG13 VAL D 83 | -23.035 | 16.671 | 12.436 | 1.00  | 40.36 |      | H0 |
| ANISOU10858 | HG13 VAL D 83 | 5470    | 5390   | 4470   | -930  | 820   | -330 | H0 |
| ATOM 10859  | HG21 VAL D 83 | -24.789 | 17.235 | 10.353 | 1.00  | 41.48 |      | H0 |
| ANISOU10859 | HG21 VAL D 83 | 5720    | 5650   | 4390   | -930  | 730   | -220 | H0 |
| ATOM 10860  | HG22 VAL D 83 | -25.624 | 16.069 | 11.034 | 1.00  | 40.91 |      | H0 |
| ANISOU10860 | HG22 VAL D 83 | 5620    | 5590   | 4330   | -950  | 650   | -300 | H0 |
| ATOM 10861  | HG23 VAL D 83 | -25.205 | 15.957 | 9.507  | 1.00  | 42.07 |      | H0 |
| ANISOU10861 | HG23 VAL D 83 | 5850    | 5800   | 4340   | -970  | 700   | -300 | H0 |
| ATOM 10862  | N PROD 84     | -20.249 | 16.246 | 11.041 | 1.00  | 40.67 |      | N0 |
| ANISOU10862 | N PROD 84     | 5530    | 5480   | 4440   | -940  | 1040  | -360 | N0 |
| ATOM 10863  | CA PROD 84    | -19.002 | 15.677 | 11.545 | 1.00  | 40.80 |      | C0 |
| ANISOU10863 | CA PROD 84    | 5470    | 5500   | 4520   | -910  | 1120  | -410 | C0 |
| ATOM 10864  | C PROD 84     | -19.287 | 14.471 | 12.457 | 1.00  | 40.30 |      | C0 |
| ANISOU10864 | C PROD 84     | 5400    | 5410   | 4510   | -870  | 1070  | -480 | C0 |
| ATOM 10865  | O PROD 84     | -20.220 | 14.516 | 13.241 | 1.00  | 39.75 |      | O0 |
| ANISOU10865 | O PROD 84     | 5320    | 5300   | 4480   | -880  | 990   | -480 | O0 |
| ATOM 10866  | CB PROD 84    | -18.312 | 16.845 | 12.271 | 1.00  | 40.72 |      | C0 |
| ANISOU10866 | CB PROD 84    | 5370    | 5480   | 4620   | -950  | 1140  | -360 | C0 |
| ATOM 10867  | CG PROD 84    | -19.406 | 17.874 | 12.487 | 1.00  | 40.26 |      | C0 |
| ANISOU10867 | CG PROD 84    | 5360    | 5360   | 4580   | -980  | 1060  | -310 | C0 |
| ATOM 10868  | CD PROD 84    | -20.379 | 17.678 | 11.344 | 1.00  | 40.79 |      | C0 |
| ANISOU10868 | CD PROD 84    | 5520    | 5460   | 4520   | -970  | 1030  | -280 | C0 |
| ATOM 10869  | HA PROD 84    | -18.443 | 15.395 | 10.778 | 1.00  | 41.57 |      | H0 |
| ANISOU10869 | HA PROD 84    | 5590    | 5640   | 4560   | -900  | 1190  | -420 | H0 |
| ATOM 10870  | HB2 PROD 84   | -17.937 | 16.551 | 13.127 | 1.00  | 40.32 |      | H0 |
| ANISOU10870 | HB2 PROD 84   | 5260    | 5430   | 4630   | -940  | 1130  | -390 | H0 |
| ATOM 10871  | HB3 PROD 84   | -17.590 | 17.218 | 11.722 | 1.00  | 41.43 |      | H0 |
| ANISOU10871 | HB3 PROD 84   | 5450    | 5600   | 4690   | -980  | 1210  | -330 | H0 |
| ATOM 10872  | HG2 PROD 84   | -19.851 | 17.729 | 13.347 | 1.00  | 39.63 |      | H0 |
| ANISOU10872 | HG2 PROD 84   | 5250    | 5260   | 4550   | -960  | 1000  | -330 | H0 |
| ATOM 10873  | HG3 PROD 84   | -19.035 | 18.780 | 12.474 | 1.00  | 40.71 |      | H0 |
| ANISOU10873 | HG3 PROD 84   | 5400    | 5400   | 4670   | -1020 | 1080  | -260 | H0 |
| ATOM 10874  | HD2 PROD 84   | -21.287 | 17.902 | 11.617 | 1.00  | 40.36 |      | H0 |
| ANISOU10874 | HD2 PROD 84   | 5480    | 5380   | 4470   | -960  | 960   | -260 | H0 |
| ATOM 10875  | HD3 PROD 84   | -20.133 | 18.224 | 10.574 | 1.00  | 41.46 |      | H0 |
| ANISOU10875 | HD3 PROD 84   | 5640    | 5560   | 4560   | -990  | 1070  | -220 | H0 |
| ATOM 10876  | N ASP D 85    | -18.485 | 13.415 | 12.304 | 1.00  | 40.67 |      | N0 |
| ANISOU10876 | N ASP D 85    | 5450    | 5460   | 4540   | -810  | 1140  | -540 | N0 |
| ATOM 10877  | CA ASP D 85   | -18.519 | 12.180 | 13.130 | 1.00  | 40.11 |      | C0 |
| ANISOU10877 | CA ASP D 85   | 5370    | 5340   | 4520   | -750  | 1120  | -590 | C0 |
| ATOM 10878  | C ASP D 85    | -17.811 | 12.447 | 14.465 | 1.00  | 39.98 |      | C0 |
| ANISOU10878 | C ASP D 85    | 5230    | 5340   | 4620   | -720  | 1110  | -560 | C0 |
| ATOM 10879  | O ASP D 85    | -16.855 | 11.717 | 14.786 | 1.00  | 40.56 |      | O0 |



|             |      |      |    |         |        |        |       |       |      |    |
|-------------|------|------|----|---------|--------|--------|-------|-------|------|----|
| ANISOU10879 | O    | ASPD | 85 | 5250    | 5430   | 4720   | -640  | 1170  | -580 | O0 |
| ATOM 10880  | CB   | ASPD | 85 | -17.873 | 11.013 | 12.377 | 1.00  | 41.06 |      | C0 |
| ANISOU10880 | CB   | ASPD | 85 | 5560    | 5450   | 4590   | -680  | 1210  | -660 | C0 |
| ATOM 10881  | CG   | ASPD | 85 | -16.419 | 11.243 | 11.990 | 1.00  | 41.86 |      | C0 |
| ANISOU10881 | CG   | ASPD | 85 | 5580    | 5630   | 4690   | -630  | 1330  | -650 | C0 |
| ATOM 10882  | OD1  | ASPD | 85 | -15.993 | 12.420 | 11.955 | 1.00  | 41.39 |      | O0 |
| ANISOU10882 | OD1  | ASPD | 85 | 5440    | 5640   | 4650   | -680  | 1340  | -590 | O0 |
| ATOM 10883  | OD2  | ASPD | 85 | -15.721 | 10.241 | 11.724 | 1.00  | 42.73 |      | O0 |
| ANISOU10883 | OD2  | ASPD | 85 | 5710    | 5730   | 4790   | -530  | 1410  | -710 | O0 |
| ATOM 10884  | H    | ASPD | 85 | -17.846 | 13.393 | 11.657 | 1.00  | 41.34 |      | H0 |
| ANISOU10884 | H    | ASPD | 85 | 5540    | 5580   | 4590   | -800  | 1210  | -540 | H0 |
| ATOM 10885  | HA   | ASPD | 85 | -19.461 | 11.952 | 13.311 | 1.00  | 39.81 |      | H0 |
| ANISOU10885 | HA   | ASPD | 85 | 5380    | 5270   | 4480   | -780  | 1050  | -600 | H0 |
| ATOM 10886  | HB2  | ASPD | 85 | -17.918 | 10.210 | 12.934 | 1.00  | 41.04 |      | H0 |
| ANISOU10886 | HB2  | ASPD | 85 | 5570    | 5390   | 4630   | -640  | 1200  | -680 | H0 |
| ATOM 10887  | HB3  | ASPD | 85 | -18.383 | 10.844 | 11.559 | 1.00  | 41.47 |      | H0 |
| ANISOU10887 | HB3  | ASPD | 85 | 5700    | 5490   | 4560   | -710  | 1200  | -690 | H0 |
| ATOM 10888  | N    | LEUD | 86 | -18.250 | 13.463 | 15.213 | 1.00  | 39.80 |      | N0 |
| ANISOU10888 | N    | LEUD | 86 | 5150    | 5330   | 4640   | -770  | 1050  | -520 | N0 |
| ATOM 10889  | CA   | LEUD | 86 | -17.666 | 13.799 | 16.539 | 1.00  | 39.71 |      | C0 |
| ANISOU10889 | CA   | LEUD | 86 | 5030    | 5350   | 4710   | -760  | 1020  | -520 | C0 |
| ATOM 10890  | C    | LEUD | 86 | -18.045 | 12.699 | 17.533 | 1.00  | 39.36 |      | C0 |
| ANISOU10890 | C    | LEUD | 86 | 4980    | 5280   | 4690   | -700  | 980   | -530 | C0 |
| ATOM 10891  | O    | LEUD | 86 | -19.181 | 12.210 | 17.483 | 1.00  | 38.75 |      | O0 |
| ANISOU10891 | O    | LEUD | 86 | 4980    | 5150   | 4590   | -710  | 930   | -530 | O0 |
| ATOM 10892  | CB   | LEUD | 86 | -18.163 | 15.166 | 17.019 | 1.00  | 39.42 |      | C0 |
| ANISOU10892 | CB   | LEUD | 86 | 4970    | 5300   | 4710   | -830  | 970   | -490 | C0 |
| ATOM 10893  | CG   | LEUD | 86 | -17.821 | 16.357 | 16.123 | 1.00  | 40.14 |      | C0 |
| ANISOU10893 | CG   | LEUD | 86 | 5070    | 5390   | 4790   | -900  | 1010  | -460 | C0 |
| ATOM 10894  | CD1  | LEUD | 86 | -18.212 | 17.663 | 16.803 | 1.00  | 40.40 |      | C0 |
| ANISOU10894 | CD1  | LEUD | 86 | 5090    | 5380   | 4870   | -950  | 960   | -450 | C0 |
| ATOM 10895  | CD2  | LEUD | 86 | -16.346 | 16.367 | 15.748 | 1.00  | 40.53 |      | C0 |
| ANISOU10895 | CD2  | LEUD | 86 | 5040    | 5510   | 4850   | -910  | 1110  | -460 | C0 |
| ATOM 10896  | H    | LEUD | 86 | -18.946 | 13.994 | 14.968 | 1.00  | 39.48 |      | H0 |
| ANISOU10896 | H    | LEUD | 86 | 5150    | 5270   | 4580   | -820  | 1010  | -510 | H0 |
| ATOM 10897  | HA   | LEUD | 86 | -16.686 | 13.818 | 16.449 | 1.00  | 40.25 |      | H0 |
| ANISOU10897 | HA   | LEUD | 86 | 5030    | 5460   | 4790   | -740  | 1080  | -520 | H0 |
| ATOM 10898  | HB2  | LEUD | 86 | -19.135 | 15.121 | 17.114 | 1.00  | 38.97 |      | H0 |
| ANISOU10898 | HB2  | LEUD | 86 | 4960    | 5210   | 4640   | -830  | 920   | -490 | H0 |
| ATOM 10899  | HB3  | LEUD | 86 | -17.789 | 15.332 | 17.907 | 1.00  | 39.33 |      | H0 |
| ANISOU10899 | HB3  | LEUD | 86 | 4880    | 5320   | 4740   | -830  | 950   | -500 | H0 |
| ATOM 10900  | HG   | LEUD | 86 | -18.349 | 16.275 | 15.292 | 1.00  | 40.17 |      | H0 |
| ANISOU10900 | HG   | LEUD | 86 | 5150    | 5380   | 4740   | -900  | 1020  | -440 | H0 |
| ATOM 10901  | HD11 | LEUD | 86 | -19.164 | 17.652 | 17.005 | 1.00  | 39.78 |      | H0 |
| ANISOU10901 | HD11 | LEUD | 86 | 5060    | 5280   | 4780   | -940  | 910   | -440 | H0 |
| ATOM 10902  | HD12 | LEUD | 86 | -18.015 | 18.409 | 16.211 | 1.00  | 40.76 |      | H0 |
| ANISOU10902 | HD12 | LEUD | 86 | 5160    | 5410   | 4920   | -1000 | 1000  | -410 | H0 |
| ATOM 10903  | HD13 | LEUD | 86 | -17.707 | 17.763 | 17.629 | 1.00  | 40.28 |      | H0 |
| ANISOU10903 | HD13 | LEUD | 86 | 5010    | 5390   | 4900   | -960  | 950   | -470 | H0 |
| ATOM 10904  | HD21 | LEUD | 86 | -15.810 | 16.159 | 16.533 | 1.00  | 40.72 |      | H0 |
| ANISOU10904 | HD21 | LEUD | 86 | 4980    | 5570   | 4910   | -890  | 1100  | -480 | H0 |
| ATOM 10905  | HD22 | LEUD | 86 | -16.101 | 17.247 | 15.413 | 1.00  | 41.13 |      | H0 |
| ANISOU10905 | HD22 | LEUD | 86 | 5110    | 5580   | 4930   | -970  | 1130  | -430 | H0 |
| ATOM 10906  | HD23 | LEUD | 86 | -16.181 | 15.701 | 15.058 | 1.00  | 41.03 |      | H0 |

|             |               |         |        |        |      |       |      |    |
|-------------|---------------|---------|--------|--------|------|-------|------|----|
| ANISOU10906 | HD23 LEU D 86 | 5140    | 5590   | 4860   | -870 | 1150  | -460 | H0 |
| ATOM 10907  | N ALA D 87    | -17.089 | 12.307 | 18.366 | 1.00 | 40.14 |      | N0 |
| ANISOU10907 | N ALA D 87    | 4990    | 5430   | 4840   | -640 | 990   | -520 | N0 |
| ATOM 10908  | CA ALA D 87   | -17.265 | 11.366 | 19.488 | 1.00 | 40.53 |      | C0 |
| ANISOU10908 | CA ALA D 87   | 5020    | 5470   | 4910   | -570 | 960   | -510 | C0 |
| ATOM 10909  | C ALA D 87    | -16.568 | 11.958 | 20.710 | 1.00 | 40.98 |      | C0 |
| ANISOU10909 | C ALA D 87    | 4940    | 5630   | 5000   | -560 | 920   | -490 | C0 |
| ATOM 10910  | O ALA D 87    | -15.457 | 12.477 | 20.557 | 1.00 | 40.36 |      | O0 |
| ANISOU10910 | O ALA D 87    | 4760    | 5630   | 4940   | -560 | 960   | -500 | O0 |
| ATOM 10911  | CB ALA D 87   | -16.691 | 10.021 | 19.122 | 1.00 | 41.42 |      | C0 |
| ANISOU10911 | CB ALA D 87   | 5180    | 5540   | 5020   | -460 | 1020  | -510 | C0 |
| ATOM 10912  | H ALA D 87    | -16.228 | 12.598 | 18.298 | 1.00 | 40.59 |      | H0 |
| ANISOU10912 | H ALA D 87    | 4980    | 5540   | 4910   | -630 | 1030  | -520 | H0 |
| ATOM 10913  | HA ALA D 87   | -18.227 | 11.269 | 19.681 | 1.00 | 40.04 |      | H0 |
| ANISOU10913 | HA ALA D 87   | 5010    | 5360   | 4840   | -600 | 910   | -500 | H0 |
| ATOM 10914  | HB1 ALA D 87  | -16.807 | 9.405  | 19.864 | 1.00 | 41.49 |      | H0 |
| ANISOU10914 | HB1 ALA D 87  | 5180    | 5530   | 5050   | -420 | 1000  | -490 | H0 |
| ATOM 10915  | HB2 ALA D 87  | -17.149 | 9.674  | 18.339 | 1.00 | 41.52 |      | H0 |
| ANISOU10915 | HB2 ALA D 87  | 5280    | 5480   | 5010   | -480 | 1040  | -540 | H0 |
| ATOM 10916  | HB3 ALA D 87  | -15.743 | 10.115 | 18.926 | 1.00 | 41.99 |      | H0 |
| ANISOU10916 | HB3 ALA D 87  | 5180    | 5670   | 5100   | -420 | 1070  | -510 | H0 |
| ATOM 10917  | N ALA D 88    | -17.212 | 11.896 | 21.872 | 1.00 | 42.19 |      | N0 |
| ANISOU10917 | N ALA D 88    | 5080    | 5790   | 5160   | -550 | 850   | -470 | N0 |
| ATOM 10918  | CA ALA D 88   | -16.564 | 12.162 | 23.173 | 1.00 | 43.28 |      | C0 |
| ANISOU10918 | CA ALA D 88   | 5090    | 6050   | 5310   | -530 | 810   | -460 | C0 |
| ATOM 10919  | C ALA D 88    | -15.674 | 10.959 | 23.495 | 1.00 | 44.66 |      | C0 |
| ANISOU10919 | C ALA D 88    | 5220    | 6260   | 5490   | -400 | 840   | -420 | C0 |
| ATOM 10920  | O ALA D 88    | -16.214 | 9.850  | 23.657 | 1.00 | 45.33 |      | O0 |
| ANISOU10920 | O ALA D 88    | 5390    | 6270   | 5570   | -340 | 840   | -370 | O0 |
| ATOM 10921  | CB ALA D 88   | -17.603 | 12.412 | 24.232 | 1.00 | 42.97 |      | C0 |
| ANISOU10921 | CB ALA D 88   | 5070    | 6020   | 5240   | -550 | 740   | -460 | C0 |
| ATOM 10922  | H ALA D 88    | -18.094 | 11.681 | 21.952 | 1.00 | 41.57 |      | H0 |
| ANISOU10922 | H ALA D 88    | 5060    | 5670   | 5070   | -570 | 830   | -460 | H0 |
| ATOM 10923  | HA ALA D 88   | -15.999 | 12.963 | 23.084 | 1.00 | 43.47 |      | H0 |
| ANISOU10923 | HA ALA D 88   | 5050    | 6120   | 5340   | -570 | 810   | -490 | H0 |
| ATOM 10924  | HB1 ALA D 88  | -17.183 | 12.833 | 24.999 | 1.00 | 43.15 |      | H0 |
| ANISOU10924 | HB1 ALA D 88  | 5010    | 6120   | 5260   | -550 | 710   | -470 | H0 |
| ATOM 10925  | HB2 ALA D 88  | -18.292 | 13.000 | 23.879 | 1.00 | 42.41 |      | H0 |
| ANISOU10925 | HB2 ALA D 88  | 5040    | 5900   | 5170   | -610 | 730   | -480 | H0 |
| ATOM 10926  | HB3 ALA D 88  | -18.004 | 11.570 | 24.501 | 1.00 | 42.90 |      | H0 |
| ANISOU10926 | HB3 ALA D 88  | 5090    | 5980   | 5230   | -500 | 730   | -420 | H0 |
| ATOM 10927  | N TYR D 89    | -14.358 | 11.171 | 23.544 | 1.00 | 46.17 |      | N0 |
| ANISOU10927 | N TYR D 89    | 5280    | 6570   | 5690   | -370 | 860   | -420 | N0 |
| ATOM 10928  | CA TYR D 89   | -13.319 | 10.110 | 23.631 | 1.00 | 47.55 |      | C0 |
| ANISOU10928 | CA TYR D 89   | 5390    | 6800   | 5880   | -220 | 900   | -370 | C0 |
| ATOM 10929  | C TYR D 89    | -13.474 | 9.294  | 24.925 | 1.00 | 46.72 |      | C0 |
| ANISOU10929 | C TYR D 89    | 5270    | 6730   | 5760   | -120 | 850   | -300 | C0 |
| ATOM 10930  | O TYR D 89    | -13.245 | 8.071  | 24.867 | 1.00 | 47.56 |      | O0 |
| ANISOU10930 | O TYR D 89    | 5420    | 6770   | 5880   | 20   | 890   | -240 | O0 |
| ATOM 10931  | CB TYR D 89   | -11.921 | 10.728 | 23.495 | 1.00 | 49.85 |      | C0 |
| ANISOU10931 | CB TYR D 89   | 5500    | 7250   | 6190   | -220 | 930   | -390 | C0 |
| ATOM 10932  | CG TYR D 89   | -11.538 | 11.230 | 22.119 | 1.00 | 51.05 |      | C0 |
| ANISOU10932 | CG TYR D 89   | 5670    | 7380   | 6350   | -290 | 1010  | -430 | C0 |
| ATOM 10933  | CD1 TYR D 89  | -12.279 | 10.912 | 20.988 | 1.00 | 51.59 |      | C0 |

|             |               |         |        |        |      |       |      |    |
|-------------|---------------|---------|--------|--------|------|-------|------|----|
| ANISOU10933 | CD1 TYR D 89  | 5900    | 7300   | 6400   | -300 | 1070  | -450 | C0 |
| ATOM 10934  | CD2 TYR D 89  | -10.384 | 11.980 | 21.935 | 1.00 | 53.02 |      | C0 |
| ANISOU10934 | CD2 TYR D 89  | 5750    | 7780   | 6610   | -340 | 1040  | -440 | C0 |
| ATOM 10935  | CE1 TYR D 89  | -11.907 | 11.351 | 19.727 | 1.00 | 52.22 |      | C0 |
| ANISOU10935 | CE1 TYR D 89  | 5990    | 7380   | 6470   | -350 | 1160  | -480 | C0 |
| ATOM 10936  | CE2 TYR D 89  | -9.994  | 12.422 | 20.680 | 1.00 | 53.58 |      | C0 |
| ANISOU10936 | CE2 TYR D 89  | 5830    | 7840   | 6690   | -400 | 1140  | -460 | C0 |
| ATOM 10937  | CZ TYR D 89   | -10.762 | 12.111 | 19.571 | 1.00 | 53.57 |      | C0 |
| ANISOU10937 | CZ TYR D 89   | 6010    | 7690   | 6660   | -400 | 1190  | -480 | C0 |
| ATOM 10938  | OH TYR D 89   | -10.395 | 12.533 | 18.324 | 1.00 | 56.83 |      | O0 |
| ANISOU10938 | OH TYR D 89   | 6430    | 8110   | 7050   | -450 | 1290  | -490 | O0 |
| ATOM 10939  | H TYR D 89    | -13.995 | 12.007 | 23.528 | 1.00 | 46.13 |      | H0 |
| ANISOU10939 | H TYR D 89    | 5210    | 6620   | 5690   | -430 | 850   | -450 | H0 |
| ATOM 10940  | HA TYR D 89   | -13.456 | 9.489  | 22.874 | 1.00 | 47.64 |      | H0 |
| ANISOU10940 | HA TYR D 89   | 5490    | 6710   | 5900   | -180 | 960   | -380 | H0 |
| ATOM 10941  | HB2 TYR D 89  | -11.854 | 11.473 | 24.127 | 1.00 | 49.69 |      | H0 |
| ANISOU10941 | HB2 TYR D 89  | 5410    | 7310   | 6160   | -300 | 870   | -410 | H0 |
| ATOM 10942  | HB3 TYR D 89  | -11.268 | 10.054 | 23.768 | 1.00 | 50.71 |      | H0 |
| ANISOU10942 | HB3 TYR D 89  | 5550    | 7420   | 6300   | -110 | 940   | -350 | H0 |
| ATOM 10943  | HD1 TYR D 89  | -13.062 | 10.397 | 21.077 | 1.00 | 50.91 |      | H0 |
| ANISOU10943 | HD1 TYR D 89  | 5920    | 7110   | 6310   | -280 | 1050  | -450 | H0 |
| ATOM 10944  | HD2 TYR D 89  | -9.854  | 12.198 | 22.684 | 1.00 | 53.41 |      | H0 |
| ANISOU10944 | HD2 TYR D 89  | 5680    | 7940   | 6670   | -350 | 1000  | -440 | H0 |
| ATOM 10945  | HE1 TYR D 89  | -12.433 | 11.132 | 18.975 | 1.00 | 51.95 |      | H0 |
| ANISOU10945 | HE1 TYR D 89  | 6070    | 7250   | 6410   | -360 | 1190  | -490 | H0 |
| ATOM 10946  | HE2 TYR D 89  | -9.212  | 12.941 | 20.582 | 1.00 | 54.44 |      | H0 |
| ANISOU10946 | HE2 TYR D 89  | 5820    | 8060   | 6810   | -450 | 1160  | -460 | H0 |
| ATOM 10947  | N ASN D 90    | -13.861 | 9.925  | 26.042 | 1.00 | 45.74 |      | N0 |
| ANISOU10947 | N ASN D 90    | 5090    | 6690   | 5600   | -180 | 760   | -300 | N0 |
| ATOM 10948  | CA ASN D 90   | -13.952 | 9.270  | 27.381 | 1.00 | 45.89 |      | C0 |
| ANISOU10948 | CA ASN D 90   | 5080    | 6780   | 5580   | -80  | 700   | -220 | C0 |
| ATOM 10949  | C ASN D 90    | -15.419 | 9.015  | 27.773 | 1.00 | 44.77 |      | C0 |
| ANISOU10949 | C ASN D 90    | 5070    | 6530   | 5410   | -130 | 680   | -200 | C0 |
| ATOM 10950  | O ASN D 90    | -15.693 | 8.906  | 28.984 | 1.00 | 44.80 |      | O0 |
| ANISOU10950 | O ASN D 90    | 5040    | 6630   | 5360   | -100 | 630   | -140 | O0 |
| ATOM 10951  | CB ASN D 90   | -13.198 | 10.065 | 28.456 | 1.00 | 46.36 |      | C0 |
| ANISOU10951 | CB ASN D 90   | 4970    | 7060   | 5590   | -100 | 620   | -240 | C0 |
| ATOM 10952  | CG ASN D 90   | -13.628 | 11.514 | 28.566 | 1.00 | 45.87 |      | C0 |
| ANISOU10952 | CG ASN D 90   | 4890    | 7020   | 5510   | -270 | 580   | -350 | C0 |
| ATOM 10953  | OD1 ASN D 90  | -13.932 | 12.161 | 27.565 | 1.00 | 44.87 |      | O0 |
| ANISOU10953 | OD1 ASN D 90  | 4830    | 6790   | 5430   | -370 | 620   | -410 | O0 |
| ATOM 10954  | ND2 ASN D 90  | -13.640 | 12.041 | 29.780 | 1.00 | 46.92 |      | N0 |
| ANISOU10954 | ND2 ASN D 90  | 4960    | 7290   | 5570   | -300 | 500   | -380 | N0 |
| ATOM 10955  | H ASN D 90    | -14.101 | 10.803 | 26.047 | 1.00 | 45.28 |      | H0 |
| ANISOU10955 | H ASN D 90    | 5020    | 6650   | 5530   | -270 | 740   | -350 | H0 |
| ATOM 10956  | HA ASN D 90   | -13.506 | 8.393  | 27.313 | 1.00 | 46.65 |      | H0 |
| ANISOU10956 | HA ASN D 90   | 5180    | 6860   | 5690   | 30   | 740   | -160 | H0 |
| ATOM 10957  | HB2 ASN D 90  | -13.332 | 9.628  | 29.321 | 1.00 | 46.89 |      | H0 |
| ANISOU10957 | HB2 ASN D 90  | 5020    | 7180   | 5610   | -40  | 590   | -180 | H0 |
| ATOM 10958  | HB3 ASN D 90  | -12.241 | 10.035 | 28.251 | 1.00 | 47.27 |      | H0 |
| ANISOU10958 | HB3 ASN D 90  | 4980    | 7260   | 5720   | -60  | 640   | -240 | H0 |
| ATOM 10959  | HD21 ASN D 90 | -14.180 | 12.716 | 29.963 | 1.00 | 46.25 |      | H0 |
| ANISOU10959 | HD21 ASN D 90 | 4910    | 7190   | 5480   | -370 | 480   | -430 | H0 |
| ATOM 10960  | HD22 ASN D 90 | -13.108 | 11.718 | 30.408 | 1.00 | 47.55 |      | H0 |

|             |       |      |      |      |         |       |        |      |       |      |    |
|-------------|-------|------|------|------|---------|-------|--------|------|-------|------|----|
| ANISOU10960 | HD22  | ASN  | D    | 90   | 4960    | 7490  | 5620   | -240 | 470   | -340 | H0 |
| ATOM        | 10961 | N    | ALAD | 91   | -16.330 | 8.880 | 26.802 | 1.00 | 43.67 |      | N0 |
| ANISOU10961 | N     | ALAD | 91   | 5060 | 6230    | 5300  | -190   | 720  | -220  |      | N0 |
| ATOM        | 10962 | CA   | ALAD | 91   | -17.741 | 8.485 | 27.042 | 1.00 | 43.00 |      | C0 |
| ANISOU10962 | CA    | ALAD | 91   | 5090 | 6040    | 5210  | -240   | 710  | -190  |      | C0 |
| ATOM        | 10963 | C    | ALAD | 91   | -17.805 | 6.986 | 27.353 | 1.00 | 43.41 |      | C0 |
| ANISOU10963 | C     | ALAD | 91   | 5210 | 6010    | 5270  | -140   | 740  | -80   |      | C0 |
| ATOM        | 10964 | O    | ALAD | 91   | -17.049 | 6.222 | 26.729 | 1.00 | 44.26 |      | O0 |
| ANISOU10964 | O     | ALAD | 91   | 5360 | 6040    | 5420  | -50    | 790  | -70   |      | O0 |
| ATOM        | 10965 | CB   | ALAD | 91   | -18.609 | 8.823 | 25.854 | 1.00 | 42.24 |      | C0 |
| ANISOU10965 | CB    | ALAD | 91   | 5090 | 5830    | 5130  | -340   | 730  | -250  |      | C0 |
| ATOM        | 10966 | H    | ALAD | 91   | -16.151 | 9.015 | 25.920 | 1.00 | 43.56 |      | H0 |
| ANISOU10966 | H     | ALAD | 91   | 5070 | 6160    | 5320  | -220   | 760  | -260  |      | H0 |
| ATOM        | 10967 | HA   | ALAD | 91   | -18.073 | 8.981 | 27.826 | 1.00 | 42.75 |      | H0 |
| ANISOU10967 | HA    | ALAD | 91   | 5010 | 6090    | 5130  | -270   | 670  | -190  |      | H0 |
| ATOM        | 10968 | HB1  | ALAD | 91   | -19.500 | 8.460 | 25.990 | 1.00 | 42.04 |      | H0 |
| ANISOU10968 | HB1   | ALAD | 91   | 5130 | 5750    | 5100  | -370   | 720  | -220  |      | H0 |
| ATOM        | 10969 | HB2  | ALAD | 91   | -18.664 | 9.788 | 25.757 | 1.00 | 41.72 |      | H0 |
| ANISOU10969 | HB2   | ALAD | 91   | 4990 | 5810    | 5050  | -400   | 710  | -300  |      | H0 |
| ATOM        | 10970 | HB3  | ALAD | 91   | -18.224 | 8.438 | 25.049 | 1.00 | 42.46 |      | H0 |
| ANISOU10970 | HB3   | ALAD | 91   | 5160 | 5790    | 5180  | -320   | 780  | -270  |      | H0 |
| ATOM        | 10971 | N    | ILED | 92   | -18.675 | 6.590 | 28.286 | 1.00 | 43.36 |      | N0 |
| ANISOU10971 | N     | ILED | 92   | 5240 | 6000    | 5230  | -150   | 710  | 0     |      | N0 |
| ATOM        | 10972 | CA   | ILED | 92   | -18.929 | 5.159 | 28.639 | 1.00 | 44.94 |      | C0 |
| ANISOU10972 | CA    | ILED | 92   | 5530 | 6090    | 5450  | -90    | 740  | 120   |      | C0 |
| ATOM        | 10973 | C    | ILED | 92   | -20.405 | 4.811 | 28.401 | 1.00 | 44.71 |      | C0 |
| ANISOU10973 | C     | ILED | 92   | 5620 | 5940    | 5440  | -210   | 750  | 130   |      | C0 |
| ATOM        | 10974 | O    | ILED | 92   | -20.813 | 3.713 | 28.805 | 1.00 | 46.70 |      | O0 |
| ANISOU10974 | O     | ILED | 92   | 5950 | 6090    | 5710  | -200   | 770  | 240   |      | O0 |
| ATOM        | 10975 | CB   | ILED | 92   | -18.484 | 4.862 | 30.085 | 1.00 | 45.62 |      | C0 |
| ANISOU10975 | CB    | ILED | 92   | 5540 | 6320    | 5480  | 20     | 710  | 240   |      | C0 |
| ATOM        | 10976 | CG1  | ILED | 92   | -19.275 | 5.666 | 31.123 | 1.00 | 44.76 |      | C0 |
| ANISOU10976 | CG1   | ILED | 92   | 5360 | 6360    | 5280  | -50    | 650  | 240   |      | C0 |
| ATOM        | 10977 | CG2  | ILED | 92   | -16.983 | 5.082 | 30.218 | 1.00 | 46.57 |      | C0 |
| ANISOU10977 | CG2   | ILED | 92   | 5530 | 6570    | 5590  | 150    | 690  | 230   |      | C0 |
| ATOM        | 10978 | CD1  | ILED | 92   | -19.012 | 5.245 | 32.550 | 1.00 | 46.01 |      | C0 |
| ANISOU10978 | CD1   | ILED | 92   | 5460 | 6670    | 5360  | 40     | 620  | 370   |      | C0 |
| ATOM        | 10979 | H    | ILED | 92   | -19.166 | 7.179 | 28.778 | 1.00 | 43.08 |      | H0 |
| ANISOU10979 | H     | ILED | 92   | 5170 | 6040    | 5160  | -210   | 680  | -20   |      | H0 |
| ATOM        | 10980 | HA   | ILED | 92   | -18.394 | 4.604 | 28.046 | 1.00 | 45.33 |      | H0 |
| ANISOU10980 | HA    | ILED | 92   | 5630 | 6050    | 5550  | -30    | 780  | 110   |      | H0 |
| ATOM        | 10981 | HB   | ILED | 92   | -18.660 | 3.906 | 30.257 | 1.00 | 46.52 |      | H0 |
| ANISOU10981 | HB    | ILED | 92   | 5730 | 6330    | 5610  | 70     | 740  | 330   |      | H0 |
| ATOM        | 10982 | HG12 | ILED | 92   | -19.046 | 6.615 | 31.028 | 1.00 | 44.22 |      | H0 |
| ANISOU10982 | HG12  | ILED | 92   | 5220 | 6380    | 5200  | -90    | 620  | 150   |      | H0 |
| ATOM        | 10983 | HG13 | ILED | 92   | -20.233 | 5.567 | 30.938 | 1.00 | 44.46 |      | H0 |
| ANISOU10983 | HG13  | ILED | 92   | 5390 | 6250    | 5250  | -140   | 670  | 240   |      | H0 |
| ATOM        | 10984 | HG21 | ILED | 92   | -16.517 | 4.575 | 29.530 | 1.00 | 46.90 |      | H0 |
| ANISOU10984 | HG21  | ILED | 92   | 5610 | 6520    | 5690  | 200    | 740  | 220   |      | H0 |
| ATOM        | 10985 | HG22 | ILED | 92   | -16.684 | 4.784 | 31.094 | 1.00 | 47.35 |      | H0 |
| ANISOU10985 | HG22  | ILED | 92   | 5580 | 6760    | 5650  | 220    | 670  | 310   |      | H0 |
| ATOM        | 10986 | HG23 | ILED | 92   | -16.781 | 6.028 | 30.114 | 1.00 | 45.84 |      | H0 |
| ANISOU10986 | HG23  | ILED | 92   | 5360 | 6570    | 5480  | 90     | 670  | 140   |      | H0 |
| ATOM        | 10987 | HD11 | ILED | 92   | -19.056 | 4.275 | 32.616 | 1.00 | 46.84 |      | H0 |

|                           |         |       |        |       |       |      |    |
|---------------------------|---------|-------|--------|-------|-------|------|----|
| ANISOU10987 HD11 ILE D 92 | 5640    | 6670  | 5490   | 100   | 650   | 470  | H0 |
| ATOM 10988 HD12 ILE D 92  | -19.681 | 5.638 | 33.135 | 1.00  | 45.79 |      | H0 |
| ANISOU10988 HD12 ILE D 92 | 5410    | 6710  | 5270   | -10   | 600   | 370  | H0 |
| ATOM 10989 HD13 ILE D 92  | -18.128 | 5.547 | 32.821 | 1.00  | 46.37 |      | H0 |
| ANISOU10989 HD13 ILE D 92 | 5420    | 6830  | 5370   | 110   | 590   | 350  | H0 |
| ATOM 10990 N SER D 93     | -21.173 | 5.701 | 27.768 | 1.00  | 43.67 |      | N0 |
| ANISOU10990 N SER D 93    | 5480    | 5810  | 5300   | -330  | 730   | 40   | N0 |
| ATOM 10991 CA SER D 93    | -22.557 | 5.430 | 27.301 | 1.00  | 44.25 |      | C0 |
| ANISOU10991 CA SER D 93   | 5640    | 5790  | 5380   | -460  | 730   | 30   | C0 |
| ATOM 10992 C SER D 93     | -22.764 | 6.070 | 25.925 | 1.00  | 44.51 |      | C0 |
| ANISOU10992 C SER D 93    | 5700    | 5780  | 5430   | -540  | 730   | -90  | C0 |
| ATOM 10993 O SER D 93     | -22.027 | 7.019 | 25.579 | 1.00  | 43.74 |      | O0 |
| ANISOU10993 O SER D 93    | 5540    | 5750  | 5320   | -510  | 730   | -160 | O0 |
| ATOM 10994 CB SER D 93    | -23.596 | 5.886 | 28.307 | 1.00  | 43.34 |      | C0 |
| ANISOU10994 CB SER D 93   | 5450    | 5800  | 5210   | -520  | 700   | 80   | C0 |
| ATOM 10995 OG SER D 93    | -23.773 | 7.294 | 28.277 | 1.00  | 41.57 |      | O0 |
| ANISOU10995 OG SER D 93   | 5150    | 5700  | 4950   | -550  | 670   | -10  | O0 |
| ATOM 10996 H SER D 93     | -20.905 | 6.549 | 27.574 | 1.00  | 43.22 |      | H0 |
| ANISOU10996 H SER D 93    | 5370    | 5830  | 5230   | -350  | 720   | -30  | H0 |
| ATOM 10997 HA SER D 93    | -22.650 | 4.446 | 27.191 | 1.00  | 44.97 |      | H0 |
| ANISOU10997 HA SER D 93   | 5810    | 5770  | 5510   | -460  | 760   | 80   | H0 |
| ATOM 10998 HB2 SER D 93   | -24.454 | 5.446 | 28.109 | 1.00  | 43.55 |      | H0 |
| ANISOU10998 HB2 SER D 93  | 5530    | 5760  | 5250   | -600  | 710   | 110  | H0 |
| ATOM 10999 HB3 SER D 93   | -23.315 | 5.612 | 29.209 | 1.00  | 43.86 |      | H0 |
| ANISOU10999 HB3 SER D 93  | 5490    | 5920  | 5250   | -460  | 700   | 150  | H0 |
| ATOM 11000 N LYS D 94     | -23.703 | 5.523 | 25.156 | 1.00  | 47.01 |      | N0 |
| ANISOU11000 N LYS D 94    | 6110    | 5980  | 5770   | -640  | 740   | -100 | N0 |
| ATOM 11001 CA LYS D 94    | -24.155 | 6.075 | 23.854 | 1.00  | 48.32 |      | C0 |
| ANISOU11001 CA LYS D 94   | 6310    | 6130  | 5920   | -730  | 730   | -200 | C0 |
| ATOM 11002 C LYS D 94     | -24.709 | 7.470 | 24.123 | 1.00  | 46.77 |      | C0 |
| ANISOU11002 C LYS D 94    | 6010    | 6070  | 5690   | -760  | 680   | -220 | C0 |
| ATOM 11003 O LYS D 94     | -25.349 | 7.683 | 25.146 | 1.00  | 46.29 |      | O0 |
| ANISOU11003 O LYS D 94    | 5880    | 6100  | 5600   | -770  | 660   | -170 | O0 |
| ATOM 11004 CB LYS D 94    | -25.209 | 5.133 | 23.260 | 1.00  | 51.51 |      | C0 |
| ANISOU11004 CB LYS D 94   | 6820    | 6410  | 6340   | -850  | 720   | -200 | C0 |
| ATOM 11005 CG LYS D 94    | -25.418 | 5.215 | 21.755 | 1.00  | 53.43 |      | C0 |
| ANISOU11005 CG LYS D 94   | 7140    | 6600  | 6560   | -920  | 720   | -310 | C0 |
| ATOM 11006 CD LYS D 94    | -26.175 | 4.018 | 21.194 | 1.00  | 56.12 |      | C0 |
| ANISOU11006 CD LYS D 94   | 7600    | 6800  | 6920   | -1040 | 720   | -330 | C0 |
| ATOM 11007 CE LYS D 94    | -27.543 | 3.804 | 21.821 | 1.00  | 58.12 |      | C0 |
| ANISOU11007 CE LYS D 94   | 7810    | 7100  | 7180   | -1170 | 670   | -260 | C0 |
| ATOM 11008 NZ LYS D 94    | -27.514 | 2.855 | 22.965 | 1.00  | 59.24 |      | N0 |
| ANISOU11008 NZ LYS D 94   | 7980    | 7160  | 7370   | -1160 | 710   | -150 | N0 |
| ATOM 11009 H LYS D 94     | -24.138 | 4.760 | 25.398 | 1.00  | 47.54 |      | H0 |
| ANISOU11009 H LYS D 94    | 6230    | 5980  | 5850   | -670  | 750   | -50  | H0 |
| ATOM 11010 HA LYS D 94    | -23.385 | 6.133 | 23.246 | 1.00  | 48.30 |      | H0 |
| ANISOU11010 HA LYS D 94   | 6330    | 6090  | 5930   | -680  | 750   | -250 | H0 |
| ATOM 11011 HB2 LYS D 94   | -24.956 | 4.213 | 23.482 | 1.00  | 52.17 |      | H0 |
| ANISOU11011 HB2 LYS D 94  | 6970    | 6400  | 6460   | -830  | 750   | -170 | H0 |
| ATOM 11012 HB3 LYS D 94   | -26.065 | 5.318 | 23.699 | 1.00  | 51.27 |      | H0 |
| ANISOU11012 HB3 LYS D 94  | 6740    | 6440  | 6300   | -910  | 690   | -170 | H0 |
| ATOM 11013 HG2 LYS D 94   | -25.915 | 6.035 | 21.548 | 1.00  | 52.70 |      | H0 |
| ANISOU11013 HG2 LYS D 94  | 6990    | 6600  | 6440   | -960  | 680   | -320 | H0 |
| ATOM 11014 HG3 LYS D 94   | -24.543 | 5.275 | 21.316 | 1.00  | 53.28 |      | H0 |

|             |           |    |         |        |        |       |       |      |    |
|-------------|-----------|----|---------|--------|--------|-------|-------|------|----|
| ANISOU11014 | HG3 LYS D | 94 | 7140    | 6550   | 6550   | -850  | 750   | -350 | H0 |
| ATOM 11015  | HD2 LYS D | 94 | -26.288 | 4.141  | 20.228 | 1.00  | 56.25 |      | H0 |
| ANISOU11015 | HD2 LYS D | 94 | 7660    | 6800   | 6910   | -1080 | 710   | -400 | H0 |
| ATOM 11016  | HD3 LYS D | 94 | -25.635 | 3.210  | 21.331 | 1.00  | 56.90 |      | H0 |
| ANISOU11016 | HD3 LYS D | 94 | 7780    | 6780   | 7060   | -990  | 760   | -310 | H0 |
| ATOM 11017  | HE2 LYS D | 94 | -27.892 | 4.660  | 22.133 | 1.00  | 57.01 |      | H0 |
| ANISOU11017 | HE2 LYS D | 94 | 7570    | 7090   | 7010   | -1170 | 640   | -240 | H0 |
| ATOM 11018  | HE3 LYS D | 94 | -28.157 | 3.459  | 21.145 | 1.00  | 58.40 |      | H0 |
| ANISOU11018 | HE3 LYS D | 94 | 7900    | 7090   | 7200   | -1280 | 650   | -300 | H0 |
| ATOM 11019  | HZ1 LYS D | 94 | -27.095 | 2.089  | 22.720 | 1.00  | 59.92 |      | H0 |
| ANISOU11019 | HZ1 LYS D | 94 | 8170    | 7110   | 7490   | -1140 | 740   | -160 | H0 |
| ATOM 11020  | HZ2 LYS D | 94 | -28.361 | 2.659  | 23.221 | 1.00  | 59.56 |      | H0 |
| ANISOU11020 | HZ2 LYS D | 94 | 7990    | 7220   | 7410   | -1250 | 690   | -110 | H0 |
| ATOM 11021  | HZ3 LYS D | 94 | -27.074 | 3.225  | 23.665 | 1.00  | 58.60 |      | H0 |
| ANISOU11021 | HZ3 LYS D | 94 | 7830    | 7150   | 7280   | -1070 | 720   | -100 | H0 |
| ATOM 11022  | N PROD    | 95 | -24.469 | 8.476  | 23.255 | 1.00  | 45.91 |      | N0 |
| ANISOU11022 | N PROD    | 95 | 5890    | 5990   | 5560   | -770  | 680   | -290 | N0 |
| ATOM 11023  | CA PROD   | 95 | -25.118 | 9.774  | 23.419 | 1.00  | 45.05 |      | C0 |
| ANISOU11023 | CA PROD   | 95 | 5700    | 5990   | 5430   | -790  | 640   | -310 | C0 |
| ATOM 11024  | C PROD    | 95 | -26.649 | 9.624  | 23.394 | 1.00  | 45.28 |      | C0 |
| ANISOU11024 | C PROD    | 95 | 5720    | 6040   | 5440   | -870  | 600   | -280 | C0 |
| ATOM 11025  | O PROD    | 95 | -27.171 | 9.060  | 22.448 | 1.00  | 45.72 |      | O0 |
| ANISOU11025 | O PROD    | 95 | 5840    | 6040   | 5490   | -950  | 590   | -290 | O0 |
| ATOM 11026  | CB PROD   | 95 | -24.630 | 10.605 | 22.222 | 1.00  | 44.93 |      | C0 |
| ANISOU11026 | CB PROD   | 95 | 5710    | 5950   | 5410   | -790  | 650   | -370 | C0 |
| ATOM 11027  | CG PROD   | 95 | -23.393 | 9.882  | 21.719 | 1.00  | 45.33 |      | C0 |
| ANISOU11027 | CG PROD   | 95 | 5810    | 5930   | 5480   | -750  | 700   | -390 | C0 |
| ATOM 11028  | CD PROD   | 95 | -23.592 | 8.425  | 22.077 | 1.00  | 46.26 |      | C0 |
| ANISOU11028 | CD PROD   | 95 | 5990    | 5970   | 5610   | -750  | 710   | -360 | C0 |
| ATOM 11029  | HA PROD   | 95 | -24.821 | 10.194 | 24.265 | 1.00  | 44.98 |      | H0 |
| ANISOU11029 | HA PROD   | 95 | 5640    | 6040   | 5410   | -740  | 630   | -300 | H0 |
| ATOM 11030  | HB2 PROD  | 95 | -25.315 | 10.648 | 21.521 | 1.00  | 44.94 |      | H0 |
| ANISOU11030 | HB2 PROD  | 95 | 5750    | 5940   | 5390   | -840  | 630   | -380 | H0 |
| ATOM 11031  | HB3 PROD  | 95 | -24.408 | 11.520 | 22.500 | 1.00  | 44.56 |      | H0 |
| ANISOU11031 | HB3 PROD  | 95 | 5620    | 5950   | 5360   | -770  | 640   | -390 | H0 |
| ATOM 11032  | HG2 PROD  | 95 | -23.301 | 9.989  | 20.751 | 1.00  | 45.45 |      | H0 |
| ANISOU11032 | HG2 PROD  | 95 | 5870    | 5920   | 5480   | -770  | 710   | -430 | H0 |
| ATOM 11033  | HG3 PROD  | 95 | -22.588 | 10.235 | 22.151 | 1.00  | 45.26 |      | H0 |
| ANISOU11033 | HG3 PROD  | 95 | 5750    | 5960   | 5480   | -700  | 710   | -400 | H0 |
| ATOM 11034  | HD2 PROD  | 95 | -24.016 | 7.939  | 21.346 | 1.00  | 46.49 |      | H0 |
| ANISOU11034 | HD2 PROD  | 95 | 6090    | 5940   | 5640   | -800  | 710   | -380 | H0 |
| ATOM 11035  | HD3 PROD  | 95 | -22.742 | 7.999  | 22.291 | 1.00  | 46.48 |      | H0 |
| ANISOU11035 | HD3 PROD  | 95 | 6020    | 5980   | 5660   | -680  | 740   | -350 | H0 |
| ATOM 11036  | N GLUD    | 96 | -27.320 | 10.106 | 24.440 | 1.00  | 44.96 |      | N0 |
| ANISOU11036 | N GLUD    | 96 | 5600    | 6110   | 5380   | -860  | 580   | -240 | N0 |
| ATOM 11037  | CA GLUD   | 96 | -28.799 | 10.194 | 24.523 | 1.00  | 45.24 |      | C0 |
| ANISOU11037 | CA GLUD   | 96 | 5580    | 6220   | 5390   | -920  | 560   | -210 | C0 |
| ATOM 11038  | C GLUD    | 96 | -29.209 | 11.596 | 24.070 | 1.00  | 43.37 |      | C0 |
| ANISOU11038 | C GLUD    | 96 | 5300    | 6040   | 5130   | -880  | 530   | -250 | C0 |
| ATOM 11039  | O GLUD    | 96 | -29.086 | 12.534 | 24.875 | 1.00  | 42.56 |      | O0 |
| ANISOU11039 | O GLUD    | 96 | 5150    | 6010   | 5020   | -810  | 540   | -260 | O0 |
| ATOM 11040  | CB GLUD   | 96 | -29.276 | 9.880  | 25.942 | 1.00  | 47.02 |      | C0 |
| ANISOU11040 | CB GLUD   | 96 | 5740    | 6530   | 5590   | -900  | 570   | -140 | C0 |
| ATOM 11041  | CG GLUD   | 96 | -30.785 | 9.774  | 26.065 | 1.00  | 49.43 |      | C0 |

|             |      |     |   |    |         |        |        |       |       |      |    |
|-------------|------|-----|---|----|---------|--------|--------|-------|-------|------|----|
| ANISOU11041 | CG   | GLU | D | 96 | 5970    | 6930   | 5870   | -980  | 550   | -90  | C0 |
| ATOM 11042  | CD   | GLU | D | 96 | -31.293 | 9.452  | 27.463 | 1.00  | 51.88 |      | C0 |
| ANISOU11042 | CD   | GLU | D | 96 | 6210    | 7350   | 6150   | -970  | 580   | 0    | C0 |
| ATOM 11043  | OE1  | GLU | D | 96 | -32.533 | 9.484  | 27.668 | 1.00  | 53.01 |      | O0 |
| ANISOU11043 | OE1  | GLU | D | 96 | 6260    | 7610   | 6270   | -1020 | 580   | 40   | O0 |
| ATOM 11044  | OE2  | GLU | D | 96 | -30.449 | 9.171  | 28.348 | 1.00  | 53.38 |      | O0 |
| ANISOU11044 | OE2  | GLU | D | 96 | 6420    | 7530   | 6330   | -900  | 610   | 20   | O0 |
| ATOM 11045  | H    | GLU | D | 96 | -26.899 | 10.419 | 25.185 | 1.00  | 44.88 |      | H0 |
| ANISOU11045 | H    | GLU | D | 96 | 5550    | 6140   | 5360   | -800  | 590   | -240 | H0 |
| ATOM 11046  | HA   | GLU | D | 96 | -29.188 | 9.533  | 23.904 | 1.00  | 45.60 |      | H0 |
| ANISOU11046 | HA   | GLU | D | 96 | 5670    | 6220   | 5440   | -990  | 550   | -200 | H0 |
| ATOM 11047  | HB2  | GLU | D | 96 | -28.872 | 9.034  | 26.227 | 1.00  | 47.43 |      | H0 |
| ANISOU11047 | HB2  | GLU | D | 96 | 5830    | 6530   | 5660   | -910  | 590   | -100 | H0 |
| ATOM 11048  | HB3  | GLU | D | 96 | -28.957 | 10.584 | 26.544 | 1.00  | 46.80 |      | H0 |
| ANISOU11048 | HB3  | GLU | D | 96 | 5670    | 6560   | 5550   | -830  | 570   | -150 | H0 |
| ATOM 11049  | HG2  | GLU | D | 96 | -31.186 | 10.623 | 25.781 | 1.00  | 49.20 |      | H0 |
| ANISOU11049 | HG2  | GLU | D | 96 | 5900    | 6960   | 5830   | -950  | 530   | -120 | H0 |
| ATOM 11050  | HG3  | GLU | D | 96 | -31.105 | 9.078  | 25.452 | 1.00  | 49.82 |      | H0 |
| ANISOU11050 | HG3  | GLU | D | 96 | 6060    | 6930   | 5940   | -1060 | 540   | -80  | H0 |
| ATOM 11051  | N    | VAL | D | 97 | -29.660 | 11.731 | 22.819 | 1.00  | 42.49 |      | N0 |
| ANISOU11051 | N    | VAL | D | 97 | 5220    | 5910   | 5010   | -930  | 500   | -270 | N0 |
| ATOM 11052  | CA   | VAL | D | 97 | -30.027 | 13.042 | 22.208 | 1.00  | 41.64 |      | C0 |
| ANISOU11052 | CA   | VAL | D | 97 | 5090    | 5840   | 4880   | -890  | 480   | -290 | C0 |
| ATOM 11053  | C    | VAL | D | 97 | -31.461 | 13.383 | 22.617 | 1.00  | 41.13 |      | C0 |
| ANISOU11053 | C    | VAL | D | 97 | 4930    | 5910   | 4790   | -880  | 450   | -240 | C0 |
| ATOM 11054  | O    | VAL | D | 97 | -32.367 | 12.595 | 22.308 | 1.00  | 41.83 |      | O0 |
| ANISOU11054 | O    | VAL | D | 97 | 4980    | 6040   | 4870   | -970  | 420   | -210 | O0 |
| ATOM 11055  | CB   | VAL | D | 97 | -29.854 | 13.040 | 20.679 | 1.00  | 42.15 |      | C0 |
| ANISOU11055 | CB   | VAL | D | 97 | 5230    | 5860   | 4930   | -930  | 460   | -310 | C0 |
| ATOM 11056  | CG1  | VAL | D | 97 | -30.251 | 14.385 | 20.086 | 1.00  | 42.54 |      | C0 |
| ANISOU11056 | CG1  | VAL | D | 97 | 5270    | 5940   | 4960   | -870  | 440   | -300 | C0 |
| ATOM 11057  | CG2  | VAL | D | 97 | -28.430 | 12.671 | 20.278 | 1.00  | 41.54 |      | C0 |
| ANISOU11057 | CG2  | VAL | D | 97 | 5240    | 5670   | 4870   | -930  | 510   | -350 | C0 |
| ATOM 11058  | H    | VAL | D | 97 | -29.773 | 11.022 | 22.258 | 1.00  | 42.86 |      | H0 |
| ANISOU11058 | H    | VAL | D | 97 | 5310    | 5920   | 5060   | -990  | 500   | -270 | H0 |
| ATOM 11059  | HA   | VAL | D | 97 | -29.435 | 13.721 | 22.577 | 1.00  | 41.31 |      | H0 |
| ANISOU11059 | HA   | VAL | D | 97 | 5050    | 5790   | 4860   | -830  | 500   | -310 | H0 |
| ATOM 11060  | HB   | VAL | D | 97 | -30.462 | 12.353 | 20.310 | 1.00  | 42.54 |      | H0 |
| ANISOU11060 | HB   | VAL | D | 97 | 5290    | 5920   | 4960   | -1000 | 440   | -300 | H0 |
| ATOM 11061  | HG11 | VAL | D | 97 | -31.211 | 14.401 | 19.930 | 1.00  | 42.91 |      | H0 |
| ANISOU11061 | HG11 | VAL | D | 97 | 5260    | 6060   | 4980   | -890  | 400   | -270 | H0 |
| ATOM 11062  | HG12 | VAL | D | 97 | -29.784 | 14.520 | 19.244 | 1.00  | 42.46 |      | H0 |
| ANISOU11062 | HG12 | VAL | D | 97 | 5310    | 5890   | 4930   | -880  | 450   | -310 | H0 |
| ATOM 11063  | HG13 | VAL | D | 97 | -30.011 | 15.097 | 20.705 | 1.00  | 42.22 |      | H0 |
| ANISOU11063 | HG13 | VAL | D | 97 | 5200    | 5900   | 4940   | -810  | 460   | -310 | H0 |
| ATOM 11064  | HG21 | VAL | D | 97 | -27.805 | 13.292 | 20.693 | 1.00  | 41.28 |      | H0 |
| ANISOU11064 | HG21 | VAL | D | 97 | 5200    | 5630   | 4860   | -880  | 530   | -360 | H0 |
| ATOM 11065  | HG22 | VAL | D | 97 | -28.340 | 12.720 | 19.311 | 1.00  | 41.81 |      | H0 |
| ANISOU11065 | HG22 | VAL | D | 97 | 5320    | 5690   | 4880   | -950  | 500   | -370 | H0 |
| ATOM 11066  | HG23 | VAL | D | 97 | -28.232 | 11.766 | 20.575 | 1.00  | 41.75 |      | H0 |
| ANISOU11066 | HG23 | VAL | D | 97 | 5290    | 5670   | 4910   | -950  | 520   | -350 | H0 |
| ATOM 11067  | N    | LEU | D | 98 | -31.638 | 14.523 | 23.289 | 1.00  | 40.64 |      | N0 |
| ANISOU11067 | N    | LEU | D | 98 | 4810    | 5900   | 4730   | -780  | 460   | -250 | N0 |
| ATOM 11068  | CA   | LEU | D | 98 | -32.897 | 14.930 | 23.963 | 1.00  | 41.57 |      | C0 |

|             |      |          |         |        |        |      |       |      |    |
|-------------|------|----------|---------|--------|--------|------|-------|------|----|
| ANISOU11068 | CA   | LEU D 98 | 4820    | 6150   | 4820   | -730 | 460   | -210 | C0 |
| ATOM 11069  | C    | LEU D 98 | -33.715 | 15.845 | 23.048 | 1.00 | 41.77 |      | C0 |
| ANISOU11069 | C    | LEU D 98 | 4810    | 6220   | 4830   | -680 | 420   | -190 | C0 |
| ATOM 11070  | O    | LEU D 98 | -34.905 | 16.034 | 23.337 | 1.00 | 41.99 |      | O0 |
| ANISOU11070 | O    | LEU D 98 | 4730    | 6390   | 4840   | -640 | 410   | -150 | O0 |
| ATOM 11071  | CB   | LEU D 98 | -32.546 | 15.651 | 25.268 | 1.00 | 41.72 |      | C0 |
| ANISOU11071 | CB   | LEU D 98 | 4820    | 6190   | 4840   | -630 | 500   | -250 | C0 |
| ATOM 11072  | CG   | LEU D 98 | -31.667 | 14.866 | 26.242 | 1.00 | 41.49 |      | C0 |
| ANISOU11072 | CG   | LEU D 98 | 4810    | 6150   | 4810   | -660 | 520   | -260 | C0 |
| ATOM 11073  | CD1  | LEU D 98 | -31.216 | 15.753 | 27.390 | 1.00 | 41.71 |      | C0 |
| ANISOU11073 | CD1  | LEU D 98 | 4830    | 6210   | 4810   | -560 | 550   | -320 | C0 |
| ATOM 11074  | CD2  | LEU D 98 | -32.399 | 13.642 | 26.768 | 1.00 | 41.85 |      | C0 |
| ANISOU11074 | CD2  | LEU D 98 | 4790    | 6280   | 4830   | -730 | 530   | -180 | C0 |
| ATOM 11075  | H    | LEU D 98 | -30.972 | 15.139 | 23.375 | 1.00 | 40.49 |      | H0 |
| ANISOU11075 | H    | LEU D 98 | 4830    | 5830   | 4730   | -730 | 480   | -280 | H0 |
| ATOM 11076  | HA   | LEU D 98 | -33.425 | 14.122 | 24.162 | 1.00 | 41.86 |      | H0 |
| ANISOU11076 | HA   | LEU D 98 | 4810    | 6240   | 4850   | -800 | 450   | -170 | H0 |
| ATOM 11077  | HB2  | LEU D 98 | -32.090 | 16.486 | 25.043 | 1.00 | 41.51 |      | H0 |
| ANISOU11077 | HB2  | LEU D 98 | 4830    | 6110   | 4830   | -580 | 500   | -290 | H0 |
| ATOM 11078  | HB3  | LEU D 98 | -33.380 | 15.884 | 25.723 | 1.00 | 42.24 |      | H0 |
| ANISOU11078 | HB3  | LEU D 98 | 4810    | 6360   | 4880   | -590 | 500   | -230 | H0 |
| ATOM 11079  | HG   | LEU D 98 | -30.862 | 14.559 | 25.755 | 1.00 | 41.02 |      | H0 |
| ANISOU11079 | HG   | LEU D 98 | 4810    | 6000   | 4770   | -690 | 520   | -270 | H0 |
| ATOM 11080  | HD11 | LEU D 98 | -30.705 | 16.503 | 27.040 | 1.00 | 41.46 |      | H0 |
| ANISOU11080 | HD11 | LEU D 98 | 4840    | 6100   | 4810   | -530 | 550   | -370 | H0 |
| ATOM 11081  | HD12 | LEU D 98 | -30.658 | 15.238 | 27.998 | 1.00 | 41.56 |      | H0 |
| ANISOU11081 | HD12 | LEU D 98 | 4810    | 6200   | 4780   | -570 | 560   | -310 | H0 |
| ATOM 11082  | HD13 | LEU D 98 | -31.995 | 16.086 | 27.869 | 1.00 | 42.19 |      | H0 |
| ANISOU11082 | HD13 | LEU D 98 | 4830    | 6350   | 4850   | -510 | 560   | -310 | H0 |
| ATOM 11083  | HD21 | LEU D 98 | -33.273 | 13.906 | 27.106 | 1.00 | 42.44 |      | H0 |
| ANISOU11083 | HD21 | LEU D 98 | 4790    | 6450   | 4880   | -710 | 540   | -150 | H0 |
| ATOM 11084  | HD22 | LEU D 98 | -31.882 | 13.239 | 27.488 | 1.00 | 41.84 |      | H0 |
| ANISOU11084 | HD22 | LEU D 98 | 4800    | 6270   | 4820   | -730 | 550   | -170 | H0 |
| ATOM 11085  | HD23 | LEU D 98 | -32.511 | 12.995 | 26.050 | 1.00 | 41.92 |      | H0 |
| ANISOU11085 | HD23 | LEU D 98 | 4830    | 6240   | 4860   | -810 | 510   | -150 | H0 |
| ATOM 11086  | N    | THR D 99 | -33.098 | 16.390 | 21.997 | 1.00 | 41.04 |      | N0 |
| ANISOU11086 | N    | THR D 99 | 4810    | 6030   | 4750   | -670 | 410   | -210 | N0 |
| ATOM 11087  | CA   | THR D 99 | -33.682 | 17.464 | 21.153 | 1.00 | 42.17 |      | C0 |
| ANISOU11087 | CA   | THR D 99 | 4950    | 6190   | 4880   | -590 | 380   | -180 | C0 |
| ATOM 11088  | C    | THR D 99 | -33.989 | 16.928 | 19.760 | 1.00 | 42.44 |      | C0 |
| ANISOU11088 | C    | THR D 99 | 5000    | 6260   | 4870   | -670 | 320   | -150 | C0 |
| ATOM 11089  | O    | THR D 99 | -33.400 | 15.941 | 19.326 | 1.00 | 42.77 |      | O0 |
| ANISOU11089 | O    | THR D 99 | 5110    | 6240   | 4900   | -790 | 320   | -180 | O0 |
| ATOM 11090  | CB   | THR D 99 | -32.734 | 18.665 | 21.096 | 1.00 | 41.86 |      | C0 |
| ANISOU11090 | CB   | THR D 99 | 5010    | 6020   | 4880   | -510 | 410   | -220 | C0 |
| ATOM 11091  | OG1  | THR D 99 | -31.433 | 18.150 | 20.826 | 1.00 | 40.70 |      | O0 |
| ANISOU11091 | OG1  | THR D 99 | 4950    | 5770   | 4750   | -590 | 440   | -260 | O0 |
| ATOM 11092  | CG2  | THR D 99 | -32.719 | 19.464 | 22.379 | 1.00 | 42.04 |      | C0 |
| ANISOU11092 | CG2  | THR D 99 | 5010    | 6030   | 4930   | -400 | 460   | -260 | C0 |
| ATOM 11093  | H    | THR D 99 | -32.270 | 16.139 | 21.714 | 1.00 | 40.79 |      | H0 |
| ANISOU11093 | H    | THR D 99 | 4850    | 5920   | 4730   | -710 | 420   | -240 | H0 |
| ATOM 11094  | HA   | THR D 99 | -34.524 | 17.753 | 21.572 | 1.00 | 42.62 |      | H0 |
| ANISOU11094 | HA   | THR D 99 | 4920    | 6340   | 4930   | -530 | 370   | -160 | H0 |
| ATOM 11095  | HB   | THR D 99 | -33.012 | 19.252 | 20.352 | 1.00 | 42.28 |      | H0 |



|             |               |         |        |        |       |       |      |    |
|-------------|---------------|---------|--------|--------|-------|-------|------|----|
| ANISOU11095 | HB THR D 99   | 5080    | 6060   | 4920   | -470  | 400   | -180 | H0 |
| ATOM 11096  | HG21 THR D 99 | -33.412 | 20.148 | 22.346 | 1.00  | 42.70 |      | H0 |
| ANISOU11096 | HG21 THR D 99 | 5060    | 6150   | 5010   | -320  | 450   | -240 | H0 |
| ATOM 11097  | HG22 THR D 99 | -31.850 | 19.888 | 22.489 | 1.00  | 41.71 |      | H0 |
| ANISOU11097 | HG22 THR D 99 | 5040    | 5890   | 4920   | -400  | 480   | -310 | H0 |
| ATOM 11098  | HG23 THR D 99 | -32.887 | 18.872 | 23.134 | 1.00  | 41.88 |      | H0 |
| ANISOU11098 | HG23 THR D 99 | 4930    | 6080   | 4900   | -430  | 460   | -270 | H0 |
| ATOM 11099  | N PRO D 100   | -34.925 | 17.559 | 19.016 | 1.00  | 43.29 |      | N0 |
| ANISOU11099 | N PRO D 100   | 5060    | 6450   | 4930   | -620  | 270   | -90  | N0 |
| ATOM 11100  | CA PRO D 100  | -35.129 | 17.232 | 17.606 | 1.00  | 43.59 |      | C0 |
| ANISOU11100 | CA PRO D 100  | 5130    | 6530   | 4900   | -690  | 210   | -60  | C0 |
| ATOM 11101  | C PRO D 100   | -33.811 | 17.315 | 16.825 | 1.00  | 42.31 |      | C0 |
| ANISOU11101 | C PRO D 100   | 5120    | 6220   | 4740   | -720  | 240   | -100 | C0 |
| ATOM 11102  | O PRO D 100   | -33.076 | 18.254 | 17.028 | 1.00  | 41.18 |      | O0 |
| ANISOU11102 | O PRO D 100   | 5040    | 5970   | 4640   | -640  | 300   | -100 | O0 |
| ATOM 11103  | CB PRO D 100  | -36.132 | 18.294 | 17.141 | 1.00  | 45.05 |      | C0 |
| ANISOU11103 | CB PRO D 100  | 5240    | 6820   | 5050   | -560  | 170   | 20   | C0 |
| ATOM 11104  | CG PRO D 100  | -36.900 | 18.632 | 18.399 | 1.00  | 45.25 |      | C0 |
| ANISOU11104 | CG PRO D 100  | 5140    | 6930   | 5120   | -460  | 190   | 30   | C0 |
| ATOM 11105  | CD PRO D 100  | -35.854 | 18.594 | 19.491 | 1.00  | 44.13 |      | C0 |
| ANISOU11105 | CD PRO D 100  | 5070    | 6650   | 5050   | -460  | 270   | -40  | C0 |
| ATOM 11106  | HA PRO D 100  | -35.529 | 16.330 | 17.524 | 1.00  | 43.81 |      | H0 |
| ANISOU11106 | HA PRO D 100  | 5110    | 6620   | 4910   | -790  | 180   | -70  | H0 |
| ATOM 11107  | HB2 PRO D 100 | -35.672 | 19.086 | 16.788 | 1.00  | 44.96 |      | H0 |
| ANISOU11107 | HB2 PRO D 100 | 5300    | 6730   | 5050   | -490  | 190   | 40   | H0 |
| ATOM 11108  | HB3 PRO D 100 | -36.730 | 17.938 | 16.449 | 1.00  | 45.70 |      | H0 |
| ANISOU11108 | HB3 PRO D 100 | 5280    | 7010   | 5080   | -610  | 100   | 50   | H0 |
| ATOM 11109  | HG2 PRO D 100 | -37.305 | 19.520 | 18.335 | 1.00  | 45.92 |      | H0 |
| ANISOU11109 | HG2 PRO D 100 | 5200    | 7040   | 5210   | -340  | 190   | 80   | H0 |
| ATOM 11110  | HG3 PRO D 100 | -37.604 | 17.972 | 18.566 | 1.00  | 45.71 |      | H0 |
| ANISOU11110 | HG3 PRO D 100 | 5100    | 7110   | 5160   | -520  | 160   | 50   | H0 |
| ATOM 11111  | HD2 PRO D 100 | -35.405 | 19.455 | 19.581 | 1.00  | 44.01 |      | H0 |
| ANISOU11111 | HD2 PRO D 100 | 5120    | 6540   | 5060   | -380  | 300   | -50  | H0 |
| ATOM 11112  | HD3 PRO D 100 | -36.250 | 18.348 | 20.347 | 1.00  | 44.17 |      | H0 |
| ANISOU11112 | HD3 PRO D 100 | 5000    | 6720   | 5060   | -460  | 290   | -50  | H0 |
| ATOM 11113  | N GLN D 101   | -33.547 | 16.326 | 15.969 | 1.00  | 42.82 |      | N0 |
| ANISOU11113 | N GLN D 101   | 5240    | 6280   | 4750   | -840  | 220   | -130 | N0 |
| ATOM 11114  | CA GLN D 101  | -32.282 | 16.199 | 15.197 | 1.00  | 42.68 |      | C0 |
| ANISOU11114 | CA GLN D 101  | 5350    | 6150   | 4720   | -870  | 270   | -170 | C0 |
| ATOM 11115  | C GLN D 101   | -32.356 | 17.106 | 13.956 | 1.00  | 42.78 |      | C0 |
| ANISOU11115 | C GLN D 101   | 5410    | 6190   | 4650   | -820  | 240   | -110 | C0 |
| ATOM 11116  | O GLN D 101   | -32.318 | 16.592 | 12.816 | 1.00  | 43.53 |      | O0 |
| ANISOU11116 | O GLN D 101   | 5560    | 6330   | 4650   | -890  | 210   | -120 | O0 |
| ATOM 11117  | CB GLN D 101  | -32.027 | 14.722 | 14.883 | 1.00  | 43.73 |      | C0 |
| ANISOU11117 | CB GLN D 101  | 5530    | 6260   | 4820   | -1010 | 260   | -250 | C0 |
| ATOM 11118  | CG GLN D 101  | -31.638 | 13.892 | 16.103 | 1.00  | 44.16 |      | C0 |
| ANISOU11118 | CG GLN D 101  | 5570    | 6250   | 4960   | -1040 | 310   | -290 | C0 |
| ATOM 11119  | CD GLN D 101  | -30.193 | 14.095 | 16.497 | 1.00  | 45.43 |      | C0 |
| ANISOU11119 | CD GLN D 101  | 5800    | 6290   | 5180   | -990  | 390   | -320 | C0 |
| ATOM 11120  | OE1 GLN D 101 | -29.733 | 15.220 | 16.709 | 1.00  | 46.16 |      | O0 |
| ANISOU11120 | OE1 GLN D 101 | 5890    | 6350   | 5300   | -910  | 420   | -300 | O0 |
| ATOM 11121  | NE2 GLN D 101 | -29.452 | 13.000 | 16.594 | 1.00  | 46.20 |      | N0 |
| ANISOU11121 | NE2 GLN D 101 | 5950    | 6310   | 5290   | -1040 | 430   | -370 | N0 |
| ATOM 11122  | H GLN D 101   | -34.144 | 15.658 | 15.801 | 1.00  | 43.26 |      | H0 |

|             |      |           |         |        |        |       |       |      |    |
|-------------|------|-----------|---------|--------|--------|-------|-------|------|----|
| ANISOU11122 | H    | GLN D 101 | 5250    | 6410   | 4770   | -910  | 180   | -140 | H0 |
| ATOM 11123  | HA   | GLN D 101 | -31.550 | 16.524 | 15.766 | 1.00  | 42.04 |      | H0 |
| ANISOU11123 | HA   | GLN D 101 | 5300    | 5980   | 4690   | -840  | 320   | -190 | H0 |
| ATOM 11124  | HB2  | GLN D 101 | -32.837 | 14.344 | 14.482 | 1.00  | 44.49 |      | H0 |
| ANISOU11124 | HB2  | GLN D 101 | 5590    | 6450   | 4860   | -1060 | 200   | -240 | H0 |
| ATOM 11125  | HB3  | GLN D 101 | -31.310 | 14.665 | 14.218 | 1.00  | 43.74 |      | H0 |
| ANISOU11125 | HB3  | GLN D 101 | 5610    | 6210   | 4790   | -1020 | 290   | -270 | H0 |
| ATOM 11126  | HG2  | GLN D 101 | -32.214 | 14.138 | 16.858 | 1.00  | 44.32 |      | H0 |
| ANISOU11126 | HG2  | GLN D 101 | 5510    | 6320   | 5010   | -1010 | 290   | -260 | H0 |
| ATOM 11127  | HG3  | GLN D 101 | -31.789 | 12.942 | 15.908 | 1.00  | 44.73 |      | H0 |
| ANISOU11127 | HG3  | GLN D 101 | 5670    | 6320   | 5010   | -1120 | 290   | -320 | H0 |
| ATOM 11128  | HE21 | GLN D 101 | -28.628 | 12.994 | 16.274 | 1.00  | 45.77 |      | H0 |
| ANISOU11128 | HE21 | GLN D 101 | 5950    | 6200   | 5240   | -1020 | 470   | -400 | H0 |
| ATOM 11129  | HE22 | GLN D 101 | -29.782 | 12.276 | 16.980 | 1.00  | 46.04 |      | H0 |
| ANISOU11129 | HE22 | GLN D 101 | 5920    | 6290   | 5290   | -1080 | 420   | -380 | H0 |
| ATOM 11130  | N    | LEU D 102 | -32.455 | 18.417 | 14.179 | 1.00  | 42.18 |      | N0 |
| ANISOU11130 | N    | LEU D 102 | 5330    | 6090   | 4610   | -700  | 260   | -40  | N0 |
| ATOM 11131  | CA   | LEU D 102 | -32.529 | 19.448 | 13.112 | 1.00  | 43.19 |      | C0 |
| ANISOU11131 | CA   | LEU D 102 | 5510    | 6220   | 4680   | -630  | 250   | 50   | C0 |
| ATOM 11132  | C    | LEU D 102 | -31.309 | 20.367 | 13.212 | 1.00  | 42.47 |      | C0 |
| ANISOU11132 | C    | LEU D 102 | 5520    | 5960   | 4660   | -590  | 340   | 60   | C0 |
| ATOM 11133  | O    | LEU D 102 | -30.980 | 20.805 | 14.337 | 1.00  | 41.03 |      | O0 |
| ANISOU11133 | O    | LEU D 102 | 5320    | 5680   | 4590   | -550  | 380   | 20   | O0 |
| ATOM 11134  | CB   | LEU D 102 | -33.820 | 20.258 | 13.261 | 1.00  | 44.36 |      | C0 |
| ANISOU11134 | CB   | LEU D 102 | 5560    | 6470   | 4830   | -500  | 190   | 140  | C0 |
| ATOM 11135  | CG   | LEU D 102 | -35.126 | 19.488 | 13.074 | 1.00  | 44.95 |      | C0 |
| ANISOU11135 | CG   | LEU D 102 | 5500    | 6750   | 4830   | -540  | 90    | 150  | C0 |
| ATOM 11136  | CD1  | LEU D 102 | -36.313 | 20.419 | 13.257 | 1.00  | 46.20 |      | C0 |
| ANISOU11136 | CD1  | LEU D 102 | 5550    | 7020   | 4980   | -380  | 50    | 260  | C0 |
| ATOM 11137  | CD2  | LEU D 102 | -35.175 | 18.815 | 11.712 | 1.00  | 45.63 |      | C0 |
| ANISOU11137 | CD2  | LEU D 102 | 5630    | 6930   | 4770   | -650  | 30    | 150  | C0 |
| ATOM 11138  | H    | LEU D 102 | -32.470 | 18.768 | 15.018 | 1.00  | 42.02 |      | H0 |
| ANISOU11138 | H    | LEU D 102 | 5280    | 6030   | 4660   | -650  | 280   | -50  | H0 |
| ATOM 11139  | HA   | LEU D 102 | -32.519 | 18.999 | 12.238 | 1.00  | 43.56 |      | H0 |
| ANISOU11139 | HA   | LEU D 102 | 5580    | 6320   | 4650   | -680  | 220   | 50   | H0 |
| ATOM 11140  | HB2  | LEU D 102 | -33.826 | 20.660 | 14.152 | 1.00  | 43.91 |      | H0 |
| ANISOU11140 | HB2  | LEU D 102 | 5480    | 6360   | 4850   | -440  | 220   | 130  | H0 |
| ATOM 11141  | HB3  | LEU D 102 | -33.799 | 20.988 | 12.611 | 1.00  | 45.01 |      | H0 |
| ANISOU11141 | HB3  | LEU D 102 | 5690    | 6530   | 4880   | -440  | 190   | 210  | H0 |
| ATOM 11142  | HG   | LEU D 102 | -35.174 | 18.786 | 13.769 | 1.00  | 44.36 |      | H0 |
| ANISOU11142 | HG   | LEU D 102 | 5390    | 6680   | 4790   | -610  | 100   | 90   | H0 |
| ATOM 11143  | HD11 | LEU D 102 | -36.258 | 20.850 | 14.127 | 1.00  | 45.80 |      | H0 |
| ANISOU11143 | HD11 | LEU D 102 | 5490    | 6900   | 5010   | -310  | 90    | 240  | H0 |
| ATOM 11144  | HD12 | LEU D 102 | -37.139 | 19.908 | 13.200 | 1.00  | 46.77 |      | H0 |
| ANISOU11144 | HD12 | LEU D 102 | 5520    | 7240   | 5010   | -420  | -20   | 260  | H0 |
| ATOM 11145  | HD13 | LEU D 102 | -36.304 | 21.098 | 12.559 | 1.00  | 46.95 |      | H0 |
| ANISOU11145 | HD13 | LEU D 102 | 5690    | 7110   | 5040   | -310  | 30    | 330  | H0 |
| ATOM 11146  | HD21 | LEU D 102 | -34.778 | 19.400 | 11.044 | 1.00  | 46.03 |      | H0 |
| ANISOU11146 | HD21 | LEU D 102 | 5760    | 6950   | 4790   | -600  | 40    | 200  | H0 |
| ATOM 11147  | HD22 | LEU D 102 | -36.101 | 18.632 | 11.472 | 1.00  | 46.60 |      | H0 |
| ANISOU11147 | HD22 | LEU D 102 | 5660    | 7200   | 4840   | -650  | -50   | 180  | H0 |
| ATOM 11148  | HD23 | LEU D 102 | -34.679 | 17.979 | 11.746 | 1.00  | 45.04 |      | H0 |
| ANISOU11148 | HD23 | LEU D 102 | 5600    | 6820   | 4700   | -750  | 50    | 70   | H0 |
| ATOM 11149  | N    | ALA D 103 | -30.676 | 20.634 | 12.068 | 1.00  | 42.94 |      | N0 |

|             |     |           |         |        |        |      |       |      |    |
|-------------|-----|-----------|---------|--------|--------|------|-------|------|----|
| ANISOU11149 | N   | ALA D 103 | 5670    | 5990   | 4660   | -610 | 360   | 100  | N0 |
| ATOM 11150  | CA  | ALA D 103 | -29.615 | 21.653 | 11.901 | 1.00 | 43.15 |      | C0 |
| ANISOU11150 | CA  | ALA D 103 | 5790    | 5870   | 4740   | -590 | 450   | 140  | C0 |
| ATOM 11151  | C   | ALA D 103 | -30.245 | 22.943 | 11.370 | 1.00 | 44.47 |      | C0 |
| ANISOU11151 | C   | ALA D 103 | 5990    | 6020   | 4890   | -470 | 430   | 280  | C0 |
| ATOM 11152  | O   | ALA D 103 | -31.224 | 22.855 | 10.603 | 1.00 | 45.38 |      | O0 |
| ANISOU11152 | O   | ALA D 103 | 6080    | 6270   | 4890   | -430 | 350   | 360  | O0 |
| ATOM 11153  | CB  | ALA D 103 | -28.549 | 21.147 | 10.963 | 1.00 | 42.77 |      | C0 |
| ANISOU11153 | CB  | ALA D 103 | 5810    | 5820   | 4620   | -680 | 500   | 120  | C0 |
| ATOM 11154  | H   | ALA D 103 | -30.858 | 20.199 | 11.289 | 1.00 | 43.42 |      | H0 |
| ANISOU11154 | H   | ALA D 103 | 5740    | 6130   | 4630   | -650 | 330   | 110  | H0 |
| ATOM 11155  | HA  | ALA D 103 | -29.208 | 21.836 | 12.780 | 1.00 | 42.43 |      | H0 |
| ANISOU11155 | HA  | ALA D 103 | 5690    | 5700   | 4740   | -590 | 480   | 90   | H0 |
| ATOM 11156  | HB1 | ALA D 103 | -27.832 | 21.800 | 10.902 | 1.00 | 43.09 |      | H0 |
| ANISOU11156 | HB1 | ALA D 103 | 5900    | 5770   | 4700   | -680 | 560   | 150  | H0 |
| ATOM 11157  | HB2 | ALA D 103 | -28.192 | 20.307 | 11.298 | 1.00 | 42.17 |      | H0 |
| ANISOU11157 | HB2 | ALA D 103 | 5720    | 5750   | 4550   | -740 | 510   | 40   | H0 |
| ATOM 11158  | HB3 | ALA D 103 | -28.932 | 21.005 | 10.081 | 1.00 | 43.64 |      | H0 |
| ANISOU11158 | HB3 | ALA D 103 | 5940    | 6010   | 4620   | -680 | 470   | 170  | H0 |
| ATOM 11159  | N   | ARG D 104 | -29.703 | 24.090 | 11.781 | 1.00 | 44.01 |      | N0 |
| ANISOU11159 | N   | ARG D 104 | 6000    | 5790   | 4930   | -430 | 500   | 310  | N0 |
| ATOM 11160  | CA  | ARG D 104 | -29.969 | 25.409 | 11.157 | 1.00 | 45.39 |      | C0 |
| ANISOU11160 | CA  | ARG D 104 | 6250    | 5880   | 5110   | -320 | 510   | 460  | C0 |
| ATOM 11161  | C   | ARG D 104 | -28.924 | 25.626 | 10.056 | 1.00 | 45.91 |      | C0 |
| ANISOU11161 | C   | ARG D 104 | 6420    | 5900   | 5120   | -410 | 570   | 530  | C0 |
| ATOM 11162  | O   | ARG D 104 | -27.719 | 25.614 | 10.369 | 1.00 | 45.83 |      | O0 |
| ANISOU11162 | O   | ARG D 104 | 6450    | 5790   | 5180   | -510 | 660   | 470  | O0 |
| ATOM 11163  | CB  | ARG D 104 | -29.941 | 26.505 | 12.224 | 1.00 | 45.59 |      | C0 |
| ANISOU11163 | CB  | ARG D 104 | 6320    | 5730   | 5280   | -240 | 550   | 450  | C0 |
| ATOM 11164  | CG  | ARG D 104 | -30.676 | 27.777 | 11.837 | 1.00 | 47.19 |      | C0 |
| ANISOU11164 | CG  | ARG D 104 | 6590    | 5850   | 5500   | -80  | 540   | 590  | C0 |
| ATOM 11165  | CD  | ARG D 104 | -32.178 | 27.603 | 11.748 | 1.00 | 47.80 |      | C0 |
| ANISOU11165 | CD  | ARG D 104 | 6560    | 6100   | 5500   | 70   | 450   | 650  | C0 |
| ATOM 11166  | NE  | ARG D 104 | -32.802 | 28.870 | 11.394 | 1.00 | 49.84 |      | N0 |
| ANISOU11166 | NE  | ARG D 104 | 6880    | 6270   | 5780   | 250  | 450   | 800  | N0 |
| ATOM 11167  | CZ  | ARG D 104 | -34.064 | 29.025 | 11.009 | 1.00 | 50.95 |      | C0 |
| ANISOU11167 | CZ  | ARG D 104 | 6940    | 6560   | 5850   | 410  | 370   | 920  | C0 |
| ATOM 11168  | NH1 | ARG D 104 | -34.876 | 27.983 | 10.927 | 1.00 | 50.26 |      | N0 |
| ANISOU11168 | NH1 | ARG D 104 | 6700    | 6740   | 5660   | 390  | 280   | 880  | N0 |
| ATOM 11169  | NH2 | ARG D 104 | -34.508 | 30.232 | 10.705 | 1.00 | 52.85 |      | N0 |
| ANISOU11169 | NH2 | ARG D 104 | 7270    | 6690   | 6120   | 600  | 390   | 1060 | N0 |
| ATOM 11170  | H   | ARG D 104 | -29.123 | 24.131 | 12.482 | 1.00 | 43.50 |      | H0 |
| ANISOU11170 | H   | ARG D 104 | 5940    | 5650   | 4940   | -460 | 540   | 250  | H0 |
| ATOM 11171  | HA  | ARG D 104 | -30.862 | 25.384 | 10.746 | 1.00 | 46.07 |      | H0 |
| ANISOU11171 | HA  | ARG D 104 | 6310    | 6080   | 5120   | -250 | 440   | 530  | H0 |
| ATOM 11172  | HB2 | ARG D 104 | -30.339 | 26.150 | 13.046 | 1.00 | 44.87 |      | H0 |
| ANISOU11172 | HB2 | ARG D 104 | 6150    | 5680   | 5220   | -220 | 520   | 370  | H0 |
| ATOM 11173  | HB3 | ARG D 104 | -29.008 | 26.729 | 12.416 | 1.00 | 45.32 |      | H0 |
| ANISOU11173 | HB3 | ARG D 104 | 6330    | 5580   | 5310   | -320 | 610   | 410  | H0 |
| ATOM 11174  | HG2 | ARG D 104 | -30.478 | 28.475 | 12.498 | 1.00 | 47.53 |      | H0 |
| ANISOU11174 | HG2 | ARG D 104 | 6670    | 5740   | 5640   | -50  | 580   | 560  | H0 |
| ATOM 11175  | HG3 | ARG D 104 | -30.342 | 28.088 | 10.968 | 1.00 | 48.04 |      | H0 |
| ANISOU11175 | HG3 | ARG D 104 | 6760    | 5930   | 5560   | -100 | 560   | 690  | H0 |
| ATOM 11176  | HD2 | ARG D 104 | -32.392 | 26.930 | 11.068 | 1.00 | 47.71 |      | H0 |

|             |                |         |        |        |      |       |      |    |
|-------------|----------------|---------|--------|--------|------|-------|------|----|
| ANISOU11176 | HD2 ARG D 104  | 6500    | 6240   | 5390   | 20   | 400   | 680  | H0 |
| ATOM 11177  | HD3 ARG D 104  | -32.527 | 27.292 | 12.611 | 1.00 | 47.12 |      | H0 |
| ANISOU11177 | HD3 ARG D 104  | 6390    | 6050   | 5460   | 80   | 430   | 560  | H0 |
| ATOM 11178  | HE ARG D 104   | -32.305 | 29.586 | 11.429 | 1.00 | 50.33 |      | H0 |
| ANISOU11178 | HE ARG D 104   | 7050    | 6160   | 5910   | 260  | 510   | 830  | H0 |
| ATOM 11179  | HH11 ARG D 104 | -34.586 | 27.179 | 11.126 | 1.00 | 49.11 |      | H0 |
| ANISOU11179 | HH11 ARG D 104 | 6510    | 6650   | 5500   | 270  | 270   | 790  | H0 |
| ATOM 11180  | HH12 ARG D 104 | -35.709 | 28.098 | 10.672 | 1.00 | 51.30 |      | H0 |
| ANISOU11180 | HH12 ARG D 104 | 6760    | 6980   | 5750   | 490  | 220   | 960  | H0 |
| ATOM 11181  | HH21 ARG D 104 | -33.970 | 30.927 | 10.762 | 1.00 | 53.40 |      | H0 |
| ANISOU11181 | HH21 ARG D 104 | 7450    | 6570   | 6270   | 600  | 450   | 1090 | H0 |
| ATOM 11182  | HH22 ARG D 104 | -35.342 | 30.342 | 10.452 | 1.00 | 53.86 |      | H0 |
| ANISOU11182 | HH22 ARG D 104 | 7330    | 6930   | 6200   | 720  | 330   | 1140 | H0 |
| ATOM 11183  | N VAL D 105    | -29.372 | 25.753 | 8.808  | 1.00 | 46.97 |      | N0 |
| ANISOU11183 | N VAL D 105    | 6590    | 6140   | 5110   | -370 | 540   | 660  | N0 |
| ATOM 11184  | CA VAL D 105   | -28.513 | 26.045 | 7.625  | 1.00 | 47.80 |      | C0 |
| ANISOU11184 | CA VAL D 105   | 6800    | 6230   | 5130   | -430 | 610   | 760  | C0 |
| ATOM 11185  | C VAL D 105    | -28.780 | 27.489 | 7.201  | 1.00 | 49.59 |      | C0 |
| ANISOU11185 | C VAL D 105    | 7120    | 6330   | 5380   | -320 | 630   | 950  | C0 |
| ATOM 11186  | O VAL D 105    | -29.957 | 27.822 | 6.998  | 1.00 | 51.19 |      | O0 |
| ANISOU11186 | O VAL D 105    | 7300    | 6610   | 5540   | -180 | 550   | 1050 | O0 |
| ATOM 11187  | CB VAL D 105   | -28.787 | 25.059 | 6.474  | 1.00 | 48.05 |      | C0 |
| ANISOU11187 | CB VAL D 105   | 6810    | 6490   | 4960   | -470 | 560   | 760  | C0 |
| ATOM 11188  | CG1 VAL D 105  | -27.884 | 25.320 | 5.279  | 1.00 | 49.39 |      | C0 |
| ANISOU11188 | CG1 VAL D 105  | 7080    | 6660   | 5020   | -530 | 640   | 860  | C0 |
| ATOM 11189  | CG2 VAL D 105  | -28.652 | 23.616 | 6.934  | 1.00 | 46.58 |      | C0 |
| ANISOU11189 | CG2 VAL D 105  | 6550    | 6390   | 4760   | -570 | 530   | 580  | C0 |
| ATOM 11190  | H VAL D 105    | -30.254 | 25.667 | 8.596  | 1.00 | 47.45 |      | H0 |
| ANISOU11190 | H VAL D 105    | 6610    | 6300   | 5110   | -300 | 470   | 700  | H0 |
| ATOM 11191  | HA VAL D 105   | -27.581 | 25.962 | 7.890  | 1.00 | 47.23 |      | H0 |
| ANISOU11191 | HA VAL D 105   | 6750    | 6080   | 5120   | -510 | 680   | 700  | H0 |
| ATOM 11192  | HB VAL D 105   | -29.722 | 25.197 | 6.182  | 1.00 | 48.89 |      | H0 |
| ANISOU11192 | HB VAL D 105   | 6890    | 6680   | 5000   | -390 | 480   | 830  | H0 |
| ATOM 11193  | HG11 VAL D 105 | -28.063 | 26.207 | 4.921  | 1.00 | 50.56 |      | H0 |
| ANISOU11193 | HG11 VAL D 105 | 7290    | 6760   | 5160   | -460 | 650   | 1000 | H0 |
| ATOM 11194  | HG12 VAL D 105 | -28.055 | 24.654 | 4.591  | 1.00 | 49.60 |      | H0 |
| ANISOU11194 | HG12 VAL D 105 | 7100    | 6840   | 4910   | -550 | 610   | 840  | H0 |
| ATOM 11195  | HG13 VAL D 105 | -26.953 | 25.266 | 5.557  | 1.00 | 48.76 |      | H0 |
| ANISOU11195 | HG13 VAL D 105 | 7020    | 6500   | 5010   | -600 | 720   | 810  | H0 |
| ATOM 11196  | HG21 VAL D 105 | -27.796 | 23.495 | 7.379  | 1.00 | 45.77 |      | H0 |
| ANISOU11196 | HG21 VAL D 105 | 6450    | 6200   | 4740   | -620 | 600   | 510  | H0 |
| ATOM 11197  | HG22 VAL D 105 | -28.703 | 23.023 | 6.164  | 1.00 | 46.94 |      | H0 |
| ANISOU11197 | HG22 VAL D 105 | 6600    | 6550   | 4680   | -600 | 510   | 570  | H0 |
| ATOM 11198  | HG23 VAL D 105 | -29.372 | 23.403 | 7.553  | 1.00 | 46.06 |      | H0 |
| ANISOU11198 | HG23 VAL D 105 | 6410    | 6350   | 4740   | -530 | 470   | 540  | H0 |
| ATOM 11199  | N VAL D 106    | -27.726 | 28.300 | 7.084  | 1.00 | 49.96 |      | N0 |
| ANISOU11199 | N VAL D 106    | 7270    | 6200   | 5510   | -380 | 740   | 1010 | N0 |
| ATOM 11200  | CA VAL D 106   | -27.780 | 29.697 | 6.559  | 1.00 | 52.02 |      | C0 |
| ANISOU11200 | CA VAL D 106   | 7670    | 6300   | 5800   | -300 | 790   | 1210 | C0 |
| ATOM 11201  | C VAL D 106    | -27.475 | 29.642 | 5.057  | 1.00 | 53.29 |      | C0 |
| ANISOU11201 | C VAL D 106    | 7890    | 6580   | 5780   | -340 | 820   | 1370 | C0 |
| ATOM 11202  | O VAL D 106    | -26.855 | 28.653 | 4.628  | 1.00 | 52.13 |      | O0 |
| ANISOU11202 | O VAL D 106    | 7700    | 6580   | 5520   | -450 | 840   | 1280 | O0 |
| ATOM 11203  | CB VAL D 106   | -26.809 | 30.615 | 7.331  | 1.00 | 52.28 |      | C0 |

|             |      |           |         |        |       |      |       |      |    |
|-------------|------|-----------|---------|--------|-------|------|-------|------|----|
| ANISOU11203 | CB   | VAL D 106 | 7780    | 6050   | 6030  | -380 | 890   | 1180 | C0 |
| ATOM 11204  | CG1  | VAL D 106 | -26.911 | 32.070 | 6.892 | 1.00 | 54.36 |      | C0 |
| ANISOU11204 | CG1  | VAL D 106 | 8200    | 6110   | 6350  | -310 | 940   | 1380 | C0 |
| ATOM 11205  | CG2  | VAL D 106 | -27.017 | 30.498 | 8.836 | 1.00 | 50.91 |      | C0 |
| ANISOU11205 | CG2  | VAL D 106 | 7540    | 5800   | 6000  | -370 | 860   | 990  | C0 |
| ATOM 11206  | H    | VAL D 106 | -26.885 | 28.042 | 7.322 | 1.00 | 49.31 |      | H0 |
| ANISOU11206 | H    | VAL D 106 | 7190    | 6080   | 5470  | -490 | 800   | 930  | H0 |
| ATOM 11207  | HA   | VAL D 106 | -28.685 | 30.036 | 6.678 | 1.00 | 52.60 |      | H0 |
| ANISOU11207 | HA   | VAL D 106 | 7730    | 6380   | 5880  | -170 | 730   | 1260 | H0 |
| ATOM 11208  | HB   | VAL D 106 | -25.891 | 30.306 | 7.131 | 1.00 | 51.87 |      | H0 |
| ANISOU11208 | HB   | VAL D 106 | 7730    | 6020   | 5960  | -510 | 950   | 1150 | H0 |
| ATOM 11209  | HG11 | VAL D 106 | -26.479 | 32.180 | 6.028 | 1.00 | 55.39 |      | H0 |
| ANISOU11209 | HG11 | VAL D 106 | 8380    | 6260   | 6400  | -360 | 990   | 1500 | H0 |
| ATOM 11210  | HG12 | VAL D 106 | -26.473 | 32.640 | 7.547 | 1.00 | 54.65 |      | H0 |
| ANISOU11210 | HG12 | VAL D 106 | 8290    | 5950   | 6530  | -350 | 990   | 1340 | H0 |
| ATOM 11211  | HG13 | VAL D 106 | -27.848 | 32.322 | 6.819 | 1.00 | 55.12 |      | H0 |
| ANISOU11211 | HG13 | VAL D 106 | 8300    | 6230   | 6420  | -160 | 880   | 1450 | H0 |
| ATOM 11212  | HG21 | VAL D 106 | -27.958 | 30.633 | 9.045 | 1.00 | 51.12 |      | H0 |
| ANISOU11212 | HG21 | VAL D 106 | 7540    | 5850   | 6020  | -240 | 800   | 1010 | H0 |
| ATOM 11213  | HG22 | VAL D 106 | -26.485 | 31.172 | 9.292 | 1.00 | 51.35 |      | H0 |
| ANISOU11213 | HG22 | VAL D 106 | 7660    | 5680   | 6170  | -410 | 920   | 980  | H0 |
| ATOM 11214  | HG23 | VAL D 106 | -26.743 | 29.614 | 9.135 | 1.00 | 49.47 |      | H0 |
| ANISOU11214 | HG23 | VAL D 106 | 7270    | 5730   | 5800  | -440 | 850   | 880  | H0 |
| ATOM 11215  | N    | SER D 107 | -27.910 | 30.656 | 4.299 | 1.00 | 55.57 |      | N0 |
| ANISOU11215 | N    | SER D 107 | 8280    | 6820   | 6020  | -230 | 820   | 1590 | N0 |
| ATOM 11216  | CA   | SER D 107 | -27.882 | 30.713 | 2.809 | 1.00 | 57.56 |      | C0 |
| ANISOU11216 | CA   | SER D 107 | 8590    | 7220   | 6060  | -220 | 830   | 1780 | C0 |
| ATOM 11217  | C    | SER D 107 | -26.445 | 30.791 | 2.266 | 1.00 | 58.11 |      | C0 |
| ANISOU11217 | C    | SER D 107 | 8730    | 7230   | 6110  | -390 | 970   | 1810 | C0 |
| ATOM 11218  | O    | SER D 107 | -26.265 | 30.512 | 1.068 | 1.00 | 58.63 |      | O0 |
| ANISOU11218 | O    | SER D 107 | 8830    | 7480   | 5970  | -420 | 990   | 1910 | O0 |
| ATOM 11219  | CB   | SER D 107 | -28.717 | 31.864 | 2.304 | 1.00 | 59.86 |      | C0 |
| ANISOU11219 | CB   | SER D 107 | 8980    | 7440   | 6330  | -30  | 800   | 2020 | C0 |
| ATOM 11220  | OG   | SER D 107 | -28.307 | 33.086 | 2.897 | 1.00 | 60.99 |      | O0 |
| ANISOU11220 | OG   | SER D 107 | 9240    | 7250   | 6680  | -20  | 890   | 2090 | O0 |
| ATOM 11221  | H    | SER D 107 | -28.279 | 31.408 | 4.657 | 1.00 | 56.33 |      | H0 |
| ANISOU11221 | H    | SER D 107 | 8420    | 6780   | 6210  | -140 | 820   | 1650 | H0 |
| ATOM 11222  | HA   | SER D 107 | -28.286 | 29.870 | 2.471 | 1.00 | 56.99 |      | H0 |
| ANISOU11222 | HA   | SER D 107 | 8450    | 7350   | 5850  | -220 | 760   | 1720 | H0 |
| ATOM 11223  | HB2  | SER D 107 | -28.630 | 31.927 | 1.326 | 1.00 | 61.24 |      | H0 |
| ANISOU11223 | HB2  | SER D 107 | 9200    | 7720   | 6350  | -30  | 810   | 2160 | H0 |
| ATOM 11224  | HB3  | SER D 107 | -29.662 | 31.699 | 2.517 | 1.00 | 59.82 |      | H0 |
| ANISOU11224 | HB3  | SER D 107 | 8900    | 7530   | 6300  | 80   | 700   | 2010 | H0 |
| ATOM 11225  | N    | ASP D 108 | -25.468 | 31.153 | 3.107 | 1.00 | 57.98 |      | N0 |
| ANISOU11225 | N    | ASP D 108 | 8730    | 7000   | 6290  | -510 | 1070  | 1720 | N0 |
| ATOM 11226  | CA   | ASP D 108 | -24.017 | 31.169 | 2.768 | 1.00 | 58.75 |      | C0 |
| ANISOU11226 | CA   | ASP D 108 | 8860    | 7070   | 6400  | -700 | 1210  | 1730 | C0 |
| ATOM 11227  | C    | ASP D 108 | -23.397 | 29.781 | 2.994 | 1.00 | 57.13 |      | C0 |
| ANISOU11227 | C    | ASP D 108 | 8520    | 7040   | 6140  | -800 | 1220  | 1510 | C0 |
| ATOM 11228  | O    | ASP D 108 | -22.184 | 29.638 | 2.759 | 1.00 | 57.01 |      | O0 |
| ANISOU11228 | O    | ASP D 108 | 8490    | 7040   | 6130  | -940 | 1330  | 1490 | O0 |
| ATOM 11229  | CB   | ASP D 108 | -23.273 | 32.232 | 3.580 | 1.00 | 59.35 |      | C0 |
| ANISOU11229 | CB   | ASP D 108 | 9000    | 6840   | 6710  | -790 | 1300  | 1730 | C0 |
| ATOM 11230  | CG   | ASP D 108 | -23.405 | 32.074 | 5.086 | 1.00 | 57.57 |      | C0 |

|             |     |           |         |        |        |      |       |      |    |
|-------------|-----|-----------|---------|--------|--------|------|-------|------|----|
| ANISOU11230 | CG  | ASP D 108 | 8700    | 6500   | 6670   | -790 | 1250  | 1520 | C0 |
| ATOM 11231  | OD1 | ASP D 108 | -23.738 | 30.958 | 5.541  | 1.00 | 55.43 |      | O0 |
| ANISOU11231 | OD1 | ASP D 108 | 8310    | 6400   | 6360   | -770 | 1170  | 1350 | O0 |
| ATOM 11232  | OD2 | ASP D 108 | -23.194 | 33.074 | 5.792  | 1.00 | 58.70 |      | O0 |
| ANISOU11232 | OD2 | ASP D 108 | 8920    | 6380   | 7000   | -820 | 1290  | 1520 | O0 |
| ATOM 11233  | H   | ASP D 108 | -25.641 | 31.432 | 3.954  | 1.00 | 57.39 |      | H0 |
| ANISOU11233 | H   | ASP D 108 | 8650    | 6800   | 6350   | -490 | 1050  | 1650 | H0 |
| ATOM 11234  | HA  | ASP D 108 | -23.928 | 31.398 | 1.813  | 1.00 | 60.21 |      | H0 |
| ANISOU11234 | HA  | ASP D 108 | 9100    | 7320   | 6460   | -690 | 1250  | 1880 | H0 |
| ATOM 11235  | HB2 | ASP D 108 | -22.321 | 32.201 | 3.351  | 1.00 | 59.67 |      | H0 |
| ANISOU11235 | HB2 | ASP D 108 | 9030    | 6880   | 6760   | -920 | 1390  | 1740 | H0 |
| ATOM 11236  | HB3 | ASP D 108 | -23.616 | 33.115 | 3.335  | 1.00 | 60.95 |      | H0 |
| ANISOU11236 | HB3 | ASP D 108 | 9300    | 6910   | 6940   | -730 | 1310  | 1890 | H0 |
| ATOM 11237  | N   | GLY D 109 | -24.186 | 28.805 | 3.457  | 1.00 | 56.42 |      | N0 |
| ANISOU11237 | N   | GLY D 109 | 8340    | 7080   | 6020   | -730 | 1100  | 1350 | N0 |
| ATOM 11238  | CA  | GLY D 109 | -23.760 | 27.404 | 3.631  | 1.00 | 55.34 |      | C0 |
| ANISOU11238 | CA  | GLY D 109 | 8100    | 7100   | 5820   | -810 | 1100  | 1150 | C0 |
| ATOM 11239  | C   | GLY D 109 | -23.323 | 27.090 | 5.053  | 1.00 | 54.26 |      | C0 |
| ANISOU11239 | C   | GLY D 109 | 7880    | 6860   | 5880   | -860 | 1100  | 970  | C0 |
| ATOM 11240  | O   | GLY D 109 | -22.897 | 25.943 | 5.282  | 1.00 | 53.65 |      | O0 |
| ANISOU11240 | O   | GLY D 109 | 7720    | 6890   | 5780   | -910 | 1100  | 810  | O0 |
| ATOM 11241  | H   | GLY D 109 | -25.046 | 28.955 | 3.708  | 1.00 | 56.24 |      | H0 |
| ANISOU11241 | H   | GLY D 109 | 8310    | 7050   | 6010   | -640 | 1020  | 1360 | H0 |
| ATOM 11242  | HA2 | GLY D 109 | -24.513 | 26.810 | 3.385  | 1.00 | 55.07 |      | H0 |
| ANISOU11242 | HA2 | GLY D 109 | 8040    | 7200   | 5690   | -750 | 1010  | 1120 | H0 |
| ATOM 11243  | HA3 | GLY D 109 | -23.012 | 27.215 | 3.011  | 1.00 | 55.92 |      | H0 |
| ANISOU11243 | HA3 | GLY D 109 | 8180    | 7240   | 5820   | -880 | 1170  | 1170 | H0 |
| ATOM 11244  | N   | GLU D 110 | -23.418 | 28.048 | 5.984  | 1.00 | 55.09 |      | N0 |
| ANISOU11244 | N   | GLU D 110 | 8010    | 6760   | 6170   | -850 | 1100  | 980  | N0 |
| ATOM 11245  | CA  | GLU D 110 | -23.107 | 27.811 | 7.420  | 1.00 | 54.19 |      | C0 |
| ANISOU11245 | CA  | GLU D 110 | 7810    | 6560   | 6220   | -890 | 1080  | 800  | C0 |
| ATOM 11246  | C   | GLU D 110 | -24.170 | 26.870 | 7.994  | 1.00 | 52.03 |      | C0 |
| ANISOU11246 | C   | GLU D 110 | 7460    | 6400   | 5910   | -800 | 960   | 680  | C0 |
| ATOM 11247  | O   | GLU D 110 | -25.369 | 27.083 | 7.725  | 1.00 | 51.98 |      | O0 |
| ANISOU11247 | O   | GLU D 110 | 7470    | 6430   | 5850   | -670 | 880   | 760  | O0 |
| ATOM 11248  | CB  | GLU D 110 | -23.046 | 29.109 | 8.233  | 1.00 | 56.60 |      | C0 |
| ANISOU11248 | CB  | GLU D 110 | 8180    | 6620   | 6710   | -890 | 1100  | 830  | C0 |
| ATOM 11249  | CG  | GLU D 110 | -22.552 | 28.897 | 9.663  | 1.00 | 56.53 |      | C0 |
| ANISOU11249 | CG  | GLU D 110 | 8100    | 6540   | 6840   | -960 | 1100  | 640  | C0 |
| ATOM 11250  | CD  | GLU D 110 | -22.578 | 30.110 | 10.587 | 1.00 | 58.49 |      | C0 |
| ANISOU11250 | CD  | GLU D 110 | 8420    | 6550   | 7260   | -960 | 1110  | 620  | C0 |
| ATOM 11251  | OE1 | GLU D 110 | -22.770 | 31.243 | 10.094 | 1.00 | 60.70 |      | O0 |
| ANISOU11251 | OE1 | GLU D 110 | 8830    | 6660   | 7580   | -930 | 1140  | 770  | O0 |
| ATOM 11252  | OE2 | GLU D 110 | -22.399 | 29.915 | 11.809 | 1.00 | 58.69 |      | O0 |
| ANISOU11252 | OE2 | GLU D 110 | 8380    | 6540   | 7380   | -980 | 1080  | 460  | O0 |
| ATOM 11253  | H   | GLU D 110 | -23.678 | 28.900 | 5.796  | 1.00 | 56.20 |      | H0 |
| ANISOU11253 | H   | GLU D 110 | 8220    | 6800   | 6330   | -810 | 1100  | 1090 | H0 |
| ATOM 11254  | HA  | GLU D 110 | -22.231 | 27.366 | 7.473  | 1.00 | 53.80 |      | H0 |
| ANISOU11254 | HA  | GLU D 110 | 7720    | 6550   | 6180   | -980 | 1140  | 730  | H0 |
| ATOM 11255  | HB2 | GLU D 110 | -22.448 | 29.738 | 7.777  | 1.00 | 57.73 |      | H0 |
| ANISOU11255 | HB2 | GLU D 110 | 8390    | 6680   | 6870   | -960 | 1180  | 920  | H0 |
| ATOM 11256  | HB3 | GLU D 110 | -23.941 | 29.506 | 8.259  | 1.00 | 56.89 |      | H0 |
| ANISOU11256 | HB3 | GLU D 110 | 8260    | 6610   | 6740   | -780 | 1050  | 880  | H0 |
| ATOM 11257  | HG2 | GLU D 110 | -23.092 | 28.192 | 10.078 | 1.00 | 55.29 |      | H0 |

|             |       |      |     |     |      |         |        |        |      |       |    |
|-------------|-------|------|-----|-----|------|---------|--------|--------|------|-------|----|
| ANISOU11257 | HG2   | GLU  | D   | 110 | 7880 | 6470    | 6660   | -900   | 1030 | 560   | H0 |
| ATOM        | 11258 | HG3  | GLU | D   | 110  | -21.629 | 28.568 | 9.625  | 1.00 | 56.28 | H0 |
| ANISOU11258 | HG3   | GLU  | D   | 110 | 8020 | 6550    | 6820   | -1060  | 1150 | 600   | H0 |
| ATOM        | 11259 | N    | VAL | D   | 111  | -23.728 | 25.866 | 8.751  | 1.00 | 49.79 | N0 |
| ANISOU11259 | N     | VAL  | D   | 111 | 7080 | 6170    | 5660   | -850   | 960  | 520   | N0 |
| ATOM        | 11260 | CA   | VAL | D   | 111  | -24.599 | 24.868 | 9.433  | 1.00 | 47.87 | C0 |
| ANISOU11260 | CA    | VAL  | D   | 111 | 6750 | 6030    | 5410   | -800   | 860  | 400   | C0 |
| ATOM        | 11261 | C    | VAL | D   | 111  | -24.419 | 25.036 | 10.943 | 1.00 | 46.95 | C0 |
| ANISOU11261 | C     | VAL  | D   | 111 | 6580 | 5810    | 5450   | -800   | 850  | 290   | C0 |
| ATOM        | 11262 | O    | VAL | D   | 111  | -23.265 | 25.079 | 11.402 | 1.00 | 46.11 | O0 |
| ANISOU11262 | O     | VAL  | D   | 111 | 6460 | 5640    | 5420   | -900   | 920  | 230   | O0 |
| ATOM        | 11263 | CB   | VAL | D   | 111  | -24.267 | 23.439 | 8.973  | 1.00 | 47.05 | C0 |
| ANISOU11263 | CB    | VAL  | D   | 111 | 6610 | 6080    | 5190   | -850   | 860  | 310   | C0 |
| ATOM        | 11264 | CG1  | VAL | D   | 111  | -25.171 | 22.414 | 9.643  | 1.00 | 46.08 | C0 |
| ANISOU11264 | CG1   | VAL  | D   | 111 | 6410 | 6030    | 5060   | -810   | 770  | 200   | C0 |
| ATOM        | 11265 | CG2  | VAL | D   | 111  | -24.333 | 23.315 | 7.455  | 1.00 | 47.92 | C0 |
| ANISOU11265 | CG2   | VAL  | D   | 111 | 6780 | 6300    | 5130   | -850   | 880  | 400   | C0 |
| ATOM        | 11266 | H    | VAL | D   | 111  | -22.840 | 25.725 | 8.903  | 1.00 | 49.64 | H0 |
| ANISOU11266 | H     | VAL  | D   | 111 | 7040 | 6140    | 5680   | -930   | 1020 | 470   | H0 |
| ATOM        | 11267 | HA   | VAL | D   | 111  | -25.524 | 25.059 | 9.206  | 1.00 | 48.35 | H0 |
| ANISOU11267 | HA    | VAL  | D   | 111 | 6830 | 6120    | 5430   | -720   | 800  | 460   | H0 |
| ATOM        | 11268 | HB   | VAL | D   | 111  | -23.337 | 23.248 | 9.250  | 1.00 | 46.70 | H0 |
| ANISOU11268 | HB    | VAL  | D   | 111 | 6540 | 6010    | 5200   | -910   | 920  | 260   | H0 |
| ATOM        | 11269 | HG11 | VAL | D   | 111  | -24.850 | 22.235 | 10.543 | 1.00 | 45.19 | H0 |
| ANISOU11269 | HG11  | VAL  | D   | 111 | 6250 | 5870    | 5040   | -830   | 780  | 130   | H0 |
| ATOM        | 11270 | HG12 | VAL | D   | 111  | -25.166 | 21.588 | 9.128  | 1.00 | 45.95 | H0 |
| ANISOU11270 | HG12  | VAL  | D   | 111 | 6390 | 6110    | 4960   | -830   | 760  | 170   | H0 |
| ATOM        | 11271 | HG13 | VAL | D   | 111  | -26.079 | 22.762 | 9.686  | 1.00 | 46.28 | H0 |
| ANISOU11271 | HG13  | VAL  | D   | 111 | 6430 | 6070    | 5080   | -750   | 710  | 250   | H0 |
| ATOM        | 11272 | HG21 | VAL | D   | 111  | -25.200 | 23.627 | 7.141  | 1.00 | 48.59 | H0 |
| ANISOU11272 | HG21  | VAL  | D   | 111 | 6890 | 6410    | 5160   | -790   | 820  | 470   | H0 |
| ATOM        | 11273 | HG22 | VAL | D   | 111  | -24.212 | 22.385 | 7.199  | 1.00 | 47.68 | H0 |
| ANISOU11273 | HG22  | VAL  | D   | 111 | 6730 | 6360    | 5030   | -870   | 880  | 330   | H0 |
| ATOM        | 11274 | HG23 | VAL | D   | 111  | -23.631 | 23.855 | 7.053  | 1.00 | 48.79 | H0 |
| ANISOU11274 | HG23  | VAL  | D   | 111 | 6930 | 6370    | 5240   | -880   | 950  | 470   | H0 |
| ATOM        | 11275 | N    | LEU | D   | 112  | -25.522 | 25.170 | 11.678 | 1.00 | 47.14 | N0 |
| ANISOU11275 | N     | LEU  | D   | 112 | 6580 | 5820    | 5510   | -710   | 780  | 260   | N0 |
| ATOM        | 11276 | CA   | LEU | D   | 112  | -25.534 | 25.162 | 13.164 | 1.00 | 46.74 | C0 |
| ANISOU11276 | CA    | LEU  | D   | 112 | 6470 | 5720    | 5570   | -700   | 760  | 140   | C0 |
| ATOM        | 11277 | C    | LEU | D   | 112  | -26.282 | 23.906 | 13.615 | 1.00 | 45.38 | C0 |
| ANISOU11277 | C     | LEU  | D   | 112 | 6200 | 5690    | 5350   | -670   | 690  | 70    | C0 |
| ATOM        | 11278 | O    | LEU | D   | 112  | -27.492 | 23.818 | 13.355 | 1.00 | 45.52 | O0 |
| ANISOU11278 | O     | LEU  | D   | 112 | 6200 | 5790    | 5300   | -590   | 620  | 120   | O0 |
| ATOM        | 11279 | CB   | LEU | D   | 112  | -26.192 | 26.445 | 13.685 | 1.00 | 48.36 | C0 |
| ANISOU11279 | CB    | LEU  | D   | 112 | 6730 | 5780    | 5860   | -600   | 750  | 180   | C0 |
| ATOM        | 11280 | CG   | LEU | D   | 112  | -25.457 | 27.746 | 13.350 | 1.00 | 50.82 | C0 |
| ANISOU11280 | CG    | LEU  | D   | 112 | 7160 | 5900    | 6250   | -640   | 820  | 260   | C0 |
| ATOM        | 11281 | CD1  | LEU | D   | 112  | -25.877 | 28.287 | 11.988 | 1.00 | 52.43 | C0 |
| ANISOU11281 | CD1   | LEU  | D   | 112 | 7450 | 6100    | 6370   | -580   | 830  | 440   | C0 |
| ATOM        | 11282 | CD2  | LEU | D   | 112  | -25.686 | 28.799 | 14.429 | 1.00 | 52.11 | C0 |
| ANISOU11282 | CD2   | LEU  | D   | 112 | 7370 | 5890    | 6540   | -590   | 830  | 200   | C0 |
| ATOM        | 11283 | H    | LEU | D   | 112  | -26.347 | 25.276 | 11.307 | 1.00 | 47.56 | H0 |
| ANISOU11283 | H     | LEU  | D   | 112 | 6640 | 5920    | 5510   | -640   | 730  | 320   | H0 |
| ATOM        | 11284 | HA   | LEU | D   | 112  | -24.606 | 25.114 | 13.487 | 1.00 | 46.47 | H0 |

|                            |         |        |        |      |       |      |    |
|----------------------------|---------|--------|--------|------|-------|------|----|
| ANISOU11284 HA LEU D 112   | 6430    | 5640   | 5580   | -780 | 810   | 90   | H0 |
| ATOM 11285 HB2 LEU D 112   | -27.097 | 26.496 | 13.320 | 1.00 | 48.80 |      | H0 |
| ANISOU11285 HB2 LEU D 112  | 6790    | 5890   | 5860   | -510 | 710   | 250  | H0 |
| ATOM 11286 HB3 LEU D 112   | -26.271 | 26.375 | 14.657 | 1.00 | 47.89 |      | H0 |
| ANISOU11286 HB3 LEU D 112  | 6630    | 5710   | 5850   | -590 | 740   | 100  | H0 |
| ATOM 11287 HG LEU D 112    | -24.488 | 27.550 | 13.315 | 1.00 | 50.56 |      | H0 |
| ANISOU11287 HG LEU D 112   | 7120    | 5860   | 6230   | -750 | 870   | 220  | H0 |
| ATOM 11288 HD11 LEU D 112  | -25.557 | 27.693 | 11.288 | 1.00 | 52.13 |      | H0 |
| ANISOU11288 HD11 LEU D 112 | 7390    | 6160   | 6250   | -640 | 840   | 460  | H0 |
| ATOM 11289 HD12 LEU D 112  | -25.495 | 29.172 | 11.859 | 1.00 | 53.47 |      | H0 |
| ANISOU11289 HD12 LEU D 112 | 7670    | 6090   | 6560   | -610 | 880   | 500  | H0 |
| ATOM 11290 HD13 LEU D 112  | -26.847 | 28.345 | 11.946 | 1.00 | 52.59 |      | H0 |
| ANISOU11290 HD13 LEU D 112 | 7460    | 6160   | 6360   | -470 | 780   | 480  | H0 |
| ATOM 11291 HD21 LEU D 112  | -26.642 | 28.924 | 14.564 | 1.00 | 52.12 |      | H0 |
| ANISOU11291 HD21 LEU D 112 | 7370    | 5910   | 6520   | -470 | 790   | 220  | H0 |
| ATOM 11292 HD22 LEU D 112  | -25.286 | 29.642 | 14.152 | 1.00 | 53.08 |      | H0 |
| ANISOU11292 HD22 LEU D 112 | 7590    | 5870   | 6710   | -620 | 880   | 260  | H0 |
| ATOM 11293 HD23 LEU D 112  | -25.277 | 28.506 | 15.261 | 1.00 | 51.21 |      | H0 |
| ANISOU11293 HD23 LEU D 112 | 7210    | 5780   | 6460   | -640 | 830   | 90   | H0 |
| ATOM 11294 N TYR D 113     | -25.566 | 22.949 | 14.204 | 1.00 | 44.15 |      | N0 |
| ANISOU11294 N TYR D 113    | 5990    | 5580   | 5210   | -740 | 710   | -40  | N0 |
| ATOM 11295 CA TYR D 113    | -26.139 | 21.709 | 14.780 | 1.00 | 44.01 |      | C0 |
| ANISOU11295 CA TYR D 113   | 5890    | 5670   | 5160   | -730 | 650   | -110 | C0 |
| ATOM 11296 C TYR D 113     | -25.811 | 21.676 | 16.272 | 1.00 | 43.70 |      | C0 |
| ANISOU11296 C TYR D 113    | 5800    | 5600   | 5210   | -730 | 660   | -200 | C0 |
| ATOM 11297 O TYR D 113     | -24.640 | 21.481 | 16.615 | 1.00 | 42.37 |      | O0 |
| ANISOU11297 O TYR D 113    | 5610    | 5400   | 5080   | -800 | 700   | -250 | O0 |
| ATOM 11298 CB TYR D 113    | -25.630 | 20.472 | 14.038 | 1.00 | 43.74 |      | C0 |
| ANISOU11298 CB TYR D 113   | 5860    | 5710   | 5050   | -800 | 670   | -140 | C0 |
| ATOM 11299 CG TYR D 113    | -26.100 | 19.167 | 14.626 | 1.00 | 43.05 |      | C0 |
| ANISOU11299 CG TYR D 113   | 5710    | 5690   | 4950   | -810 | 620   | -210 | C0 |
| ATOM 11300 CD1 TYR D 113   | -27.443 | 18.929 | 14.881 | 1.00 | 43.30 |      | C0 |
| ANISOU11300 CD1 TYR D 113  | 5700    | 5800   | 4950   | -780 | 550   | -190 | C0 |
| ATOM 11301 CD2 TYR D 113   | -25.192 | 18.174 | 14.949 | 1.00 | 43.18 |      | C0 |
| ANISOU11301 CD2 TYR D 113  | 5710    | 5710   | 4980   | -850 | 660   | -280 | C0 |
| ATOM 11302 CE1 TYR D 113   | -27.868 | 17.735 | 15.443 | 1.00 | 43.44 |      | C0 |
| ANISOU11302 CE1 TYR D 113  | 5670    | 5870   | 4970   | -810 | 520   | -250 | C0 |
| ATOM 11303 CE2 TYR D 113   | -25.600 | 16.975 | 15.506 | 1.00 | 42.64 |      | C0 |
| ANISOU11303 CE2 TYR D 113  | 5610    | 5680   | 4910   | -860 | 630   | -330 | C0 |
| ATOM 11304 CZ TYR D 113    | -26.941 | 16.752 | 15.747 | 1.00 | 42.88 |      | C0 |
| ANISOU11304 CZ TYR D 113   | 5610    | 5760   | 4920   | -850 | 560   | -310 | C0 |
| ATOM 11305 OH TYR D 113    | -27.312 | 15.560 | 16.291 | 1.00 | 43.81 |      | O0 |
| ANISOU11305 OH TYR D 113   | 5700    | 5910   | 5040   | -890 | 540   | -350 | O0 |
| ATOM 11306 H TYR D 113     | -24.660 | 22.988 | 14.295 | 1.00 | 44.34 |      | H0 |
| ANISOU11306 H TYR D 113    | 6020    | 5560   | 5260   | -800 | 750   | -60  | H0 |
| ATOM 11307 HA TYR D 113    | -27.124 | 21.745 | 14.681 | 1.00 | 44.18 |      | H0 |
| ANISOU11307 HA TYR D 113   | 5900    | 5740   | 5150   | -680 | 600   | -80  | H0 |
| ATOM 11308 HB2 TYR D 113   | -25.926 | 20.525 | 13.106 | 1.00 | 44.33 |      | H0 |
| ANISOU11308 HB2 TYR D 113  | 5970    | 5820   | 5050   | -800 | 660   | -90  | H0 |
| ATOM 11309 HB3 TYR D 113   | -24.650 | 20.489 | 14.043 | 1.00 | 43.71 |      | H0 |
| ANISOU11309 HB3 TYR D 113  | 5860    | 5670   | 5070   | -840 | 720   | -160 | H0 |
| ATOM 11310 HD1 TYR D 113   | -28.078 | 19.594 | 14.676 | 1.00 | 43.91 |      | H0 |
| ANISOU11310 HD1 TYR D 113  | 5780    | 5880   | 5020   | -730 | 520   | -140 | H0 |
| ATOM 11311 HD2 TYR D 113   | -24.274 | 18.317 | 14.788 | 1.00 | 43.11 |      | H0 |



|             |               |         |        |        |      |       |      |    |
|-------------|---------------|---------|--------|--------|------|-------|------|----|
| ANISOU11311 | HD2 TYR D 113 | 5720    | 5670   | 4990   | -870 | 710   | -290 | H0 |
| ATOM 11312  | HE1 TYR D 113 | -28.785 | 17.585 | 15.603 | 1.00 | 43.42 |      | H0 |
| ANISOU11312 | HE1 TYR D 113 | 5630    | 5920   | 4950   | -800 | 470   | -230 | H0 |
| ATOM 11313  | HE2 TYR D 113 | -24.966 | 16.308 | 15.713 | 1.00 | 42.48 |      | H0 |
| ANISOU11313 | HE2 TYR D 113 | 5590    | 5650   | 4910   | -880 | 660   | -370 | H0 |
| ATOM 11314  | N MET D 114   | -26.832 | 21.867 | 17.115 | 1.00 | 45.65 |      | N0 |
| ANISOU11314 | N MET D 114   | 6000    | 5870   | 5480   | -660 | 610   | -210 | N0 |
| ATOM 11315  | CA MET D 114  | -26.693 | 22.090 | 18.579 | 1.00 | 46.43 |      | C0 |
| ANISOU11315 | CA MET D 114  | 6060    | 5940   | 5640   | -640 | 610   | -300 | C0 |
| ATOM 11316  | C MET D 114   | -27.569 | 21.089 | 19.327 | 1.00 | 44.16 |      | C0 |
| ANISOU11316 | C MET D 114   | 5690    | 5770   | 5320   | -610 | 570   | -320 | C0 |
| ATOM 11317  | O MET D 114   | -28.567 | 21.471 | 19.931 | 1.00 | 44.71 |      | O0 |
| ANISOU11317 | O MET D 114   | 5720    | 5880   | 5390   | -530 | 550   | -320 | O0 |
| ATOM 11318  | CB MET D 114  | -27.125 | 23.510 | 18.969 | 1.00 | 50.29 |      | C0 |
| ANISOU11318 | CB MET D 114  | 6600    | 6330   | 6180   | -560 | 620   | -290 | C0 |
| ATOM 11319  | CG MET D 114  | -26.828 | 24.584 | 17.929 | 1.00 | 53.75 |      | C0 |
| ANISOU11319 | CG MET D 114  | 7140    | 6640   | 6640   | -560 | 650   | -210 | C0 |
| ATOM 11320  | SD MET D 114  | -25.063 | 24.817 | 17.618 | 1.00 | 57.84 |      | S0 |
| ANISOU11320 | SD MET D 114  | 7700    | 7070   | 7210   | -710 | 720   | -240 | S0 |
| ATOM 11321  | CE MET D 114  | -24.954 | 26.607 | 17.610 | 1.00 | 59.48 |      | C0 |
| ANISOU11321 | CE MET D 114  | 8030    | 7060   | 7510   | -690 | 760   | -210 | C0 |
| ATOM 11322  | H MET D 114   | -27.698 | 21.872 | 16.833 | 1.00 | 45.67 |      | H0 |
| ANISOU11322 | H MET D 114   | 6000    | 5910   | 5440   | -610 | 580   | -170 | H0 |
| ATOM 11323  | HA MET D 114  | -25.753 | 21.947 | 18.835 | 1.00 | 46.15 |      | H0 |
| ANISOU11323 | HA MET D 114  | 6020    | 5880   | 5630   | -700 | 640   | -340 | H0 |
| ATOM 11324  | HB2 MET D 114 | -28.085 | 23.507 | 19.144 | 1.00 | 50.23 |      | H0 |
| ANISOU11324 | HB2 MET D 114 | 6560    | 6370   | 6160   | -480 | 590   | -270 | H0 |
| ATOM 11325  | HB3 MET D 114 | -26.676 | 23.750 | 19.804 | 1.00 | 50.08 |      | H0 |
| ANISOU11325 | HB3 MET D 114 | 6560    | 6270   | 6200   | -570 | 630   | -360 | H0 |
| ATOM 11326  | HG2 MET D 114 | -27.268 | 24.348 | 17.085 | 1.00 | 54.16 |      | H0 |
| ANISOU11326 | HG2 MET D 114 | 7190    | 6740   | 6640   | -540 | 640   | -140 | H0 |
| ATOM 11327  | HG3 MET D 114 | -27.206 | 25.437 | 18.234 | 1.00 | 54.75 |      | H0 |
| ANISOU11327 | HG3 MET D 114 | 7300    | 6690   | 6810   | -490 | 660   | -210 | H0 |
| ATOM 11328  | HE1 MET D 114 | -24.073 | 26.874 | 17.321 | 1.00 | 59.87 |      | H0 |
| ANISOU11328 | HE1 MET D 114 | 8100    | 7050   | 7590   | -780 | 800   | -200 | H0 |
| ATOM 11329  | HE2 MET D 114 | -25.615 | 26.966 | 17.005 | 1.00 | 60.03 |      | H0 |
| ANISOU11329 | HE2 MET D 114 | 8140    | 7110   | 7560   | -620 | 760   | -120 | H0 |
| ATOM 11330  | HE3 MET D 114 | -25.117 | 26.942 | 18.501 | 1.00 | 59.62 |      | H0 |
| ANISOU11330 | HE3 MET D 114 | 8040    | 7040   | 7570   | -660 | 750   | -280 | H0 |
| ATOM 11331  | N PRO D 115   | -27.234 | 19.781 | 19.326 | 1.00 | 41.43 |      | N0 |
| ANISOU11331 | N PRO D 115   | 5310    | 5490   | 4940   | -670 | 570   | -340 | N0 |
| ATOM 11332  | CA PRO D 115  | -27.995 | 18.808 | 20.104 | 1.00 | 40.82 |      | C0 |
| ANISOU11332 | CA PRO D 115  | 5160    | 5510   | 4850   | -670 | 540   | -350 | C0 |
| ATOM 11333  | C PRO D 115   | -27.776 | 18.993 | 21.615 | 1.00 | 40.14 |      | C0 |
| ANISOU11333 | C PRO D 115   | 5020    | 5440   | 4790   | -640 | 550   | -410 | C0 |
| ATOM 11334  | O PRO D 115   | -26.669 | 19.291 | 22.020 | 1.00 | 40.07 |      | O0 |
| ANISOU11334 | O PRO D 115   | 5030    | 5380   | 4820   | -660 | 570   | -460 | O0 |
| ATOM 11335  | CB PRO D 115  | -27.437 | 17.457 | 19.631 | 1.00 | 40.52 |      | C0 |
| ANISOU11335 | CB PRO D 115  | 5130    | 5480   | 4780   | -740 | 540   | -360 | C0 |
| ATOM 11336  | CG PRO D 115  | -26.025 | 17.774 | 19.189 | 1.00 | 40.24 |      | C0 |
| ANISOU11336 | CG PRO D 115  | 5140    | 5370   | 4770   | -770 | 590   | -380 | C0 |
| ATOM 11337  | CD PRO D 115  | -26.119 | 19.165 | 18.591 | 1.00 | 41.54 |      | C0 |
| ANISOU11337 | CD PRO D 115  | 5360    | 5480   | 4950   | -750 | 600   | -350 | C0 |
| ATOM 11338  | HA PRO D 115  | -28.957 | 18.874 | 19.880 | 1.00 | 41.13 |      | H0 |

|             |     |           |         |        |        |      |       |      |    |
|-------------|-----|-----------|---------|--------|--------|------|-------|------|----|
| ANISOU11338 | HA  | PRO D 115 | 5170    | 5600   | 4860   | -640 | 510   | -310 | H0 |
| ATOM 11339  | HB2 | PRO D 115 | -27.435 | 16.800 | 20.360 | 1.00 | 40.19 |      | H0 |
| ANISOU11339 | HB2 | PRO D 115 | 5060    | 5470   | 4750   | -750 | 540   | -380 | H0 |
| ATOM 11340  | HB3 | PRO D 115 | -27.964 | 17.101 | 18.884 | 1.00 | 40.66 |      | H0 |
| ANISOU11340 | HB3 | PRO D 115 | 5160    | 5530   | 4760   | -770 | 520   | -330 | H0 |
| ATOM 11341  | HG2 | PRO D 115 | -25.411 | 17.764 | 19.951 | 1.00 | 40.28 |      | H0 |
| ANISOU11341 | HG2 | PRO D 115 | 5120    | 5370   | 4810   | -770 | 610   | -420 | H0 |
| ATOM 11342  | HG3 | PRO D 115 | -25.715 | 17.129 | 18.522 | 1.00 | 40.47 |      | H0 |
| ANISOU11342 | HG3 | PRO D 115 | 5200    | 5400   | 4770   | -800 | 610   | -380 | H0 |
| ATOM 11343  | HD2 | PRO D 115 | -25.293 | 19.662 | 18.726 | 1.00 | 41.41 |      | H0 |
| ANISOU11343 | HD2 | PRO D 115 | 5350    | 5410   | 4970   | -760 | 630   | -370 | H0 |
| ATOM 11344  | HD3 | PRO D 115 | -26.312 | 19.123 | 17.636 | 1.00 | 41.57 |      | H0 |
| ANISOU11344 | HD3 | PRO D 115 | 5390    | 5490   | 4910   | -760 | 600   | -310 | H0 |
| ATOM 11345  | N   | SER D 116 | -28.837 | 18.839 | 22.402 | 1.00 | 38.94 |      | N0 |
| ANISOU11345 | N   | SER D 116 | 4810    | 5370   | 4620   | -590 | 530   | -400 | N0 |
| ATOM 11346  | CA  | SER D 116 | -28.743 | 18.609 | 23.860 | 1.00 | 38.73 |      | C0 |
| ANISOU11346 | CA  | SER D 116 | 4730    | 5400   | 4590   | -560 | 540   | -440 | C0 |
| ATOM 11347  | C   | SER D 116 | -28.546 | 17.110 | 24.079 | 1.00 | 38.08 |      | C0 |
| ANISOU11347 | C   | SER D 116 | 4610    | 5370   | 4480   | -630 | 530   | -410 | C0 |
| ATOM 11348  | O   | SER D 116 | -29.378 | 16.337 | 23.588 | 1.00 | 37.86 |      | O0 |
| ANISOU11348 | O   | SER D 116 | 4570    | 5380   | 4430   | -670 | 510   | -360 | O0 |
| ATOM 11349  | CB  | SER D 116 | -29.937 | 19.128 | 24.611 | 1.00 | 39.20 |      | C0 |
| ANISOU11349 | CB  | SER D 116 | 4730    | 5540   | 4620   | -480 | 530   | -440 | C0 |
| ATOM 11350  | OG  | SER D 116 | -29.664 | 19.103 | 26.005 | 1.00 | 38.60 |      | O0 |
| ANISOU11350 | OG  | SER D 116 | 4620    | 5520   | 4520   | -450 | 550   | -490 | O0 |
| ATOM 11351  | H   | SER D 116 | -29.698 | 18.863 | 22.104 | 1.00 | 39.52 |      | H0 |
| ANISOU11351 | H   | SER D 116 | 4860    | 5490   | 4670   | -560 | 510   | -360 | H0 |
| ATOM 11352  | HA  | SER D 116 | -27.936 | 19.082 | 24.194 | 1.00 | 38.70 |      | H0 |
| ANISOU11352 | HA  | SER D 116 | 4750    | 5350   | 4600   | -560 | 550   | -490 | H0 |
| ATOM 11353  | HB2 | SER D 116 | -30.133 | 20.049 | 24.326 | 1.00 | 39.49 |      | H0 |
| ANISOU11353 | HB2 | SER D 116 | 4800    | 5530   | 4680   | -420 | 540   | -450 | H0 |
| ATOM 11354  | HB3 | SER D 116 | -30.721 | 18.567 | 24.415 | 1.00 | 39.15 |      | H0 |
| ANISOU11354 | HB3 | SER D 116 | 4670    | 5610   | 4590   | -490 | 520   | -390 | H0 |
| ATOM 11355  | N   | ILE D 117 | -27.466 | 16.736 | 24.768 | 1.00 | 38.22 |      | N0 |
| ANISOU11355 | N   | ILE D 117 | 4630    | 5380   | 4510   | -640 | 550   | -450 | N0 |
| ATOM 11356  | CA  | ILE D 117 | -27.030 | 15.325 | 24.964 | 1.00 | 38.09 |      | C0 |
| ANISOU11356 | CA  | ILE D 117 | 4610    | 5380   | 4490   | -680 | 550   | -410 | C0 |
| ATOM 11357  | C   | ILE D 117 | -26.950 | 15.036 | 26.464 | 1.00 | 38.38 |      | C0 |
| ANISOU11357 | C   | ILE D 117 | 4590    | 5500   | 4490   | -650 | 560   | -410 | C0 |
| ATOM 11358  | O   | ILE D 117 | -26.377 | 15.848 | 27.203 | 1.00 | 38.75 |      | O0 |
| ANISOU11358 | O   | ILE D 117 | 4620    | 5580   | 4530   | -610 | 550   | -470 | O0 |
| ATOM 11359  | CB  | ILE D 117 | -25.691 | 15.070 | 24.248 | 1.00 | 38.03 |      | C0 |
| ANISOU11359 | CB  | ILE D 117 | 4650    | 5290   | 4510   | -710 | 570   | -430 | C0 |
| ATOM 11360  | CG1 | ILE D 117 | -25.832 | 15.262 | 22.736 | 1.00 | 38.54 |      | C0 |
| ANISOU11360 | CG1 | ILE D 117 | 4770    | 5290   | 4580   | -750 | 580   | -430 | C0 |
| ATOM 11361  | CG2 | ILE D 117 | -25.139 | 13.693 | 24.592 | 1.00 | 38.10 |      | C0 |
| ANISOU11361 | CG2 | ILE D 117 | 4660    | 5300   | 4520   | -710 | 590   | -400 | C0 |
| ATOM 11362  | CD1 | ILE D 117 | -24.530 | 15.176 | 21.972 | 1.00 | 38.88 |      | C0 |
| ANISOU11362 | CD1 | ILE D 117 | 4850    | 5280   | 4640   | -770 | 620   | -450 | C0 |
| ATOM 11363  | H   | ILE D 117 | -26.916 | 17.338 | 25.173 | 1.00 | 38.24 |      | H0 |
| ANISOU11363 | H   | ILE D 117 | 4640    | 5370   | 4520   | -620 | 550   | -490 | H0 |
| ATOM 11364  | HA  | ILE D 117 | -27.701 | 14.739 | 24.572 | 1.00 | 38.18 |      | H0 |
| ANISOU11364 | HA  | ILE D 117 | 4620    | 5400   | 4490   | -710 | 550   | -370 | H0 |
| ATOM 11365  | HB  | ILE D 117 | -25.045 | 15.744 | 24.575 | 1.00 | 38.16 |      | H0 |

|                            |         |        |        |      |       |      |    |
|----------------------------|---------|--------|--------|------|-------|------|----|
| ANISOU11365 HB ILE D 117   | 4650    | 5310   | 4540   | -700 | 580   | -470 | H0 |
| ATOM 11366 HG12 ILE D 117  | -26.444 | 14.577 | 22.389 | 1.00 | 38.56 |      | H0 |
| ANISOU11366 HG12 ILE D 117 | 4790    | 5300   | 4560   | -770 | 570   | -400 | H0 |
| ATOM 11367 HG13 ILE D 117  | -26.237 | 16.139 | 22.566 | 1.00 | 38.59 |      | H0 |
| ANISOU11367 HG13 ILE D 117 | 4780    | 5290   | 4590   | -730 | 570   | -430 | H0 |
| ATOM 11368 HG21 ILE D 117  | -24.889 | 13.666 | 25.532 | 1.00 | 38.22 |      | H0 |
| ANISOU11368 HG21 ILE D 117 | 4630    | 5370   | 4520   | -680 | 580   | -400 | H0 |
| ATOM 11369 HG22 ILE D 117  | -24.354 | 13.508 | 24.048 | 1.00 | 38.09 |      | H0 |
| ANISOU11369 HG22 ILE D 117 | 4680    | 5260   | 4530   | -720 | 610   | -410 | H0 |
| ATOM 11370 HG23 ILE D 117  | -25.817 | 13.017 | 24.419 | 1.00 | 38.19 |      | H0 |
| ANISOU11370 HG23 ILE D 117 | 4680    | 5310   | 4520   | -740 | 580   | -370 | H0 |
| ATOM 11371 HD11 ILE D 117  | -23.833 | 15.644 | 22.464 | 1.00 | 38.81 |      | H0 |
| ANISOU11371 HD11 ILE D 117 | 4820    | 5280   | 4650   | -750 | 620   | -480 | H0 |
| ATOM 11372 HD12 ILE D 117  | -24.639 | 15.588 | 21.097 | 1.00 | 38.86 |      | H0 |
| ANISOU11372 HD12 ILE D 117 | 4890    | 5240   | 4630   | -780 | 620   | -450 | H0 |
| ATOM 11373 HD13 ILE D 117  | -24.278 | 14.244 | 21.860 | 1.00 | 38.80 |      | H0 |
| ANISOU11373 HD13 ILE D 117 | 4860    | 5260   | 4630   | -770 | 630   | -440 | H0 |
| ATOM 11374 N ARG D 118     | -27.512 | 13.906 | 26.884 | 1.00 | 38.54 |      | N0 |
| ANISOU11374 N ARG D 118    | 4590    | 5570   | 4490   | -670 | 560   | -340 | N0 |
| ATOM 11375 CA ARG D 118    | -27.217 | 13.293 | 28.198 | 1.00 | 39.01 |      | C0 |
| ANISOU11375 CA ARG D 118   | 4610    | 5710   | 4510   | -640 | 570   | -310 | C0 |
| ATOM 11376 C ARG D 118     | -26.275 | 12.113 | 27.962 | 1.00 | 38.51 |      | C0 |
| ANISOU11376 C ARG D 118    | 4580    | 5570   | 4470   | -650 | 580   | -270 | C0 |
| ATOM 11377 O ARG D 118     | -26.614 | 11.242 | 27.139 | 1.00 | 38.07 |      | O0 |
| ANISOU11377 O ARG D 118    | 4580    | 5440   | 4450   | -710 | 590   | -230 | O0 |
| ATOM 11378 CB ARG D 118    | -28.492 | 12.841 | 28.907 | 1.00 | 39.94 |      | C0 |
| ANISOU11378 CB ARG D 118   | 4670    | 5920   | 4580   | -640 | 580   | -240 | C0 |
| ATOM 11379 CG ARG D 118    | -28.195 | 12.138 | 30.218 | 1.00 | 40.78 |      | C0 |
| ANISOU11379 CG ARG D 118   | 4750    | 6120   | 4630   | -610 | 590   | -180 | C0 |
| ATOM 11380 CD ARG D 118    | -29.438 | 11.858 | 31.008 | 1.00 | 41.55 |      | C0 |
| ANISOU11380 CD ARG D 118   | 4780    | 6330   | 4670   | -620 | 610   | -100 | C0 |
| ATOM 11381 NE ARG D 118    | -29.078 | 11.191 | 32.241 | 1.00 | 42.58 |      | N0 |
| ANISOU11381 NE ARG D 118   | 4890    | 6550   | 4740   | -590 | 630   | -30  | N0 |
| ATOM 11382 CZ ARG D 118    | -29.897 | 11.028 | 33.273 | 1.00 | 43.73 |      | C0 |
| ANISOU11382 CZ ARG D 118   | 4970    | 6840   | 4800   | -580 | 660   | 40   | C0 |
| ATOM 11383 NH1 ARG D 118   | -31.136 | 11.492 | 33.219 | 1.00 | 44.17 |      | N0 |
| ANISOU11383 NH1 ARG D 118  | 4960    | 6980   | 4840   | -590 | 680   | 30   | N0 |
| ATOM 11384 NH2 ARG D 118   | -29.468 | 10.404 | 34.357 | 1.00 | 43.76 |      | N0 |
| ANISOU11384 NH2 ARG D 118  | 4970    | 6930   | 4730   | -540 | 680   | 120  | N0 |
| ATOM 11385 H ARG D 118     | -28.116 | 13.441 | 26.386 | 1.00 | 38.63 |      | H0 |
| ANISOU11385 H ARG D 118    | 4610    | 5570   | 4500   | -700 | 550   | -310 | H0 |
| ATOM 11386 HA ARG D 118    | -26.762 | 13.957 | 28.759 | 1.00 | 39.04 |      | H0 |
| ANISOU11386 HA ARG D 118   | 4590    | 5750   | 4490   | -600 | 560   | -360 | H0 |
| ATOM 11387 HB2 ARG D 118   | -29.055 | 13.623 | 29.080 | 1.00 | 40.02 |      | H0 |
| ANISOU11387 HB2 ARG D 118  | 4650    | 5990   | 4570   | -610 | 570   | -270 | H0 |
| ATOM 11388 HB3 ARG D 118   | -28.985 | 12.231 | 28.319 | 1.00 | 39.96 |      | H0 |
| ANISOU11388 HB3 ARG D 118  | 4690    | 5890   | 4600   | -700 | 580   | -200 | H0 |
| ATOM 11389 HG2 ARG D 118   | -27.737 | 11.291 | 30.037 | 1.00 | 40.80 |      | H0 |
| ANISOU11389 HG2 ARG D 118  | 4790    | 6060   | 4660   | -640 | 600   | -130 | H0 |
| ATOM 11390 HG3 ARG D 118   | -27.594 | 12.697 | 30.756 | 1.00 | 40.76 |      | H0 |
| ANISOU11390 HG3 ARG D 118  | 4730    | 6150   | 4600   | -570 | 580   | -230 | H0 |
| ATOM 11391 HD2 ARG D 118   | -29.895 | 12.703 | 31.207 | 1.00 | 41.69 |      | H0 |
| ANISOU11391 HD2 ARG D 118  | 4760    | 6420   | 4660   | -580 | 610   | -150 | H0 |
| ATOM 11392 HD3 ARG D 118   | -30.045 | 11.291 | 30.486 | 1.00 | 41.73 |      | H0 |

|             |                |         |        |        |      |       |      |    |
|-------------|----------------|---------|--------|--------|------|-------|------|----|
| ANISOU11392 | HD3 ARG D 118  | 4810    | 6320   | 4720   | -690 | 620   | -50  | H0 |
| ATOM 11393  | HE ARG D 118   | -28.270 | 10.873 | 32.311 | 1.00 | 42.52 |      | H0 |
| ANISOU11393 | HE ARG D 118   | 4910    | 6500   | 4740   | -570 | 620   | -20  | H0 |
| ATOM 11394  | HH11 ARG D 118 | -31.424 | 11.907 | 32.502 | 1.00 | 43.68 |      | H0 |
| ANISOU11394 | HH11 ARG D 118 | 4900    | 6870   | 4820   | -600 | 670   | -10  | H0 |
| ATOM 11395  | HH12 ARG D 118 | -31.673 | 11.381 | 33.906 | 1.00 | 44.76 |      | H0 |
| ANISOU11395 | HH12 ARG D 118 | 4990    | 7160   | 4860   | -580 | 710   | 80   | H0 |
| ATOM 11396  | HH21 ARG D 118 | -28.645 | 10.095 | 34.391 | 1.00 | 43.95 |      | H0 |
| ANISOU11396 | HH21 ARG D 118 | 5030    | 6910   | 4770   | -520 | 660   | 130  | H0 |
| ATOM 11397  | HH22 ARG D 118 | -30.010 | 10.294 | 35.043 | 1.00 | 44.70 |      | H0 |
| ANISOU11397 | HH22 ARG D 118 | 5040    | 7150   | 4790   | -540 | 700   | 170  | H0 |
| ATOM 11398  | N GLN D 119    | -25.134 | 12.094 | 28.650 | 1.00 | 38.29 |      | N0 |
| ANISOU11398 | N GLN D 119    | 4540    | 5580   | 4430   | -600 | 580   | -280 | N0 |
| ATOM 11399  | CA GLN D 119   | -24.077 | 11.079 | 28.420 | 1.00 | 39.17 |      | C0 |
| ANISOU11399 | CA GLN D 119   | 4680    | 5630   | 4570   | -580 | 590   | -240 | C0 |
| ATOM 11400  | C GLN D 119    | -23.211 | 10.914 | 29.666 | 1.00 | 40.32 |      | C0 |
| ANISOU11400 | C GLN D 119    | 4760    | 5890   | 4670   | -510 | 580   | -210 | C0 |
| ATOM 11401  | O GLN D 119    | -22.978 | 11.912 | 30.375 | 1.00 | 40.94 |      | O0 |
| ANISOU11401 | O GLN D 119    | 4780    | 6070   | 4700   | -490 | 550   | -280 | O0 |
| ATOM 11402  | CB GLN D 119   | -23.203 | 11.478 | 27.229 | 1.00 | 38.11 |      | C0 |
| ANISOU11402 | CB GLN D 119   | 4570    | 5420   | 4490   | -590 | 600   | -300 | C0 |
| ATOM 11403  | CG GLN D 119   | -22.378 | 10.325 | 26.682 | 1.00 | 37.75 |      | C0 |
| ANISOU11403 | CG GLN D 119   | 4570    | 5290   | 4480   | -560 | 640   | -270 | C0 |
| ATOM 11404  | CD GLN D 119   | -21.745 | 10.692 | 25.364 | 1.00 | 37.37 |      | C0 |
| ANISOU11404 | CD GLN D 119   | 4560    | 5170   | 4470   | -580 | 660   | -330 | C0 |
| ATOM 11405  | OE1 GLN D 119  | -21.534 | 11.863 | 25.068 | 1.00 | 36.52 |      | O0 |
| ANISOU11405 | OE1 GLN D 119  | 4420    | 5090   | 4360   | -610 | 650   | -390 | O0 |
| ATOM 11406  | NE2 GLN D 119  | -21.441 | 9.688  | 24.560 | 1.00 | 37.18 |      | N0 |
| ANISOU11406 | NE2 GLN D 119  | 4600    | 5050   | 4470   | -570 | 700   | -320 | N0 |
| ATOM 11407  | H GLN D 119    | -24.937 | 12.702 | 29.300 | 1.00 | 38.67 |      | H0 |
| ANISOU11407 | H GLN D 119    | 4550    | 5700   | 4450   | -570 | 560   | -310 | H0 |
| ATOM 11408  | HA GLN D 119   | -24.511 | 10.218 | 28.221 | 1.00 | 39.23 |      | H0 |
| ANISOU11408 | HA GLN D 119   | 4720    | 5590   | 4590   | -600 | 610   | -180 | H0 |
| ATOM 11409  | HB2 GLN D 119  | -23.782 | 11.825 | 26.519 | 1.00 | 37.76 |      | H0 |
| ANISOU11409 | HB2 GLN D 119  | 4560    | 5330   | 4460   | -630 | 600   | -330 | H0 |
| ATOM 11410  | HB3 GLN D 119  | -22.602 | 12.200 | 27.509 | 1.00 | 38.09 |      | H0 |
| ANISOU11410 | HB3 GLN D 119  | 4530    | 5460   | 4480   | -580 | 590   | -350 | H0 |
| ATOM 11411  | HG2 GLN D 119  | -21.676 | 10.090 | 27.326 | 1.00 | 38.29 |      | H0 |
| ANISOU11411 | HG2 GLN D 119  | 4600    | 5410   | 4540   | -510 | 630   | -240 | H0 |
| ATOM 11412  | HG3 GLN D 119  | -22.954 | 9.540  | 26.560 | 1.00 | 38.09 |      | H0 |
| ANISOU11412 | HG3 GLN D 119  | 4660    | 5280   | 4530   | -580 | 650   | -220 | H0 |
| ATOM 11413  | HE21 GLN D 119 | -20.939 | 9.829  | 23.847 | 1.00 | 37.39 |      | H0 |
| ANISOU11413 | HE21 GLN D 119 | 4640    | 5050   | 4510   | -570 | 730   | -350 | H0 |
| ATOM 11414  | HE22 GLN D 119 | -21.739 | 8.873  | 24.735 | 1.00 | 37.70 |      | H0 |
| ANISOU11414 | HE22 GLN D 119 | 4710    | 5070   | 4540   | -560 | 710   | -280 | H0 |
| ATOM 11415  | N ARG D 120    | -22.736 | 9.688  | 29.872 | 1.00 | 42.31 |      | N0 |
| ANISOU11415 | N ARG D 120    | 5030    | 6110   | 4930   | -460 | 590   | -120 | N0 |
| ATOM 11416  | CA ARG D 120   | -21.923 | 9.264  | 31.035 | 1.00 | 44.35 |      | C0 |
| ANISOU11416 | CA ARG D 120   | 5230    | 6480   | 5140   | -370 | 580   | -60  | C0 |
| ATOM 11417  | C ARG D 120    | -20.450 | 9.253  | 30.608 | 1.00 | 44.09 |      | C0 |
| ANISOU11417 | C ARG D 120    | 5160    | 6440   | 5140   | -320 | 580   | -90  | C0 |
| ATOM 11418  | O ARG D 120    | -20.172 | 8.890  | 29.444 | 1.00 | 43.00 |      | O0 |
| ANISOU11418 | O ARG D 120    | 5090    | 6180   | 5080   | -330 | 610   | -110 | O0 |
| ATOM 11419  | CB ARG D 120   | -22.441 | 7.905  | 31.516 | 1.00 | 47.36 |      | C0 |

|             |      |           |         |        |        |      |       |      |    |
|-------------|------|-----------|---------|--------|--------|------|-------|------|----|
| ANISOU11419 | CB   | ARG D 120 | 5670    | 6810   | 5510   | -350 | 610   | 90   | C0 |
| ATOM 11420  | CG   | ARG D 120 | -22.133 | 7.594  | 32.973 | 1.00 | 50.70 |      | C0 |
| ANISOU11420 | CG   | ARG D 120 | 6030    | 7390   | 5840   | -270 | 580   | 190  | C0 |
| ATOM 11421  | CD   | ARG D 120 | -23.142 | 6.636  | 33.586 | 1.00 | 53.03 |      | C0 |
| ANISOU11421 | CD   | ARG D 120 | 6370    | 7670   | 6110   | -290 | 620   | 330  | C0 |
| ATOM 11422  | NE   | ARG D 120 | -22.755 | 6.196  | 34.923 | 1.00 | 56.01 |      | N0 |
| ANISOU11422 | NE   | ARG D 120 | 6710    | 8190   | 6380   | -190 | 600   | 450  | N0 |
| ATOM 11423  | CZ   | ARG D 120 | -22.763 | 6.958  | 36.020 | 1.00 | 57.76 |      | C0 |
| ANISOU11423 | CZ   | ARG D 120 | 6840    | 8630   | 6480   | -170 | 570   | 420  | C0 |
| ATOM 11424  | NH1  | ARG D 120 | -23.125 | 8.230  | 35.960 | 1.00 | 56.79 |      | N0 |
| ANISOU11424 | NH1  | ARG D 120 | 6670    | 8580   | 6320   | -220 | 540   | 270  | N0 |
| ATOM 11425  | NH2  | ARG D 120 | -22.398 | 6.442  | 37.182 | 1.00 | 60.14 |      | N0 |
| ANISOU11425 | NH2  | ARG D 120 | 7110    | 9070   | 6670   | -80  | 550   | 550  | N0 |
| ATOM 11426  | H    | ARG D 120 | -22.885 | 9.011  | 29.281 | 1.00 | 42.28 |      | H0 |
| ANISOU11426 | H    | ARG D 120 | 5090    | 6010   | 4970   | -480 | 620   | -90  | H0 |
| ATOM 11427  | HA   | ARG D 120 | -22.041 | 9.923  | 31.754 | 1.00 | 44.51 |      | H0 |
| ANISOU11427 | HA   | ARG D 120 | 5200    | 6610   | 5100   | -370 | 550   | -90  | H0 |
| ATOM 11428  | HB2  | ARG D 120 | -23.412 | 7.879  | 31.387 | 1.00 | 47.12 |      | H0 |
| ANISOU11428 | HB2  | ARG D 120 | 5670    | 6760   | 5480   | -410 | 620   | 100  | H0 |
| ATOM 11429  | HB3  | ARG D 120 | -22.045 | 7.205  | 30.954 | 1.00 | 47.56 |      | H0 |
| ANISOU11429 | HB3  | ARG D 120 | 5750    | 6730   | 5590   | -330 | 630   | 120  | H0 |
| ATOM 11430  | HG2  | ARG D 120 | -21.239 | 7.198  | 33.036 | 1.00 | 51.00 |      | H0 |
| ANISOU11430 | HG2  | ARG D 120 | 6060    | 7430   | 5890   | -200 | 580   | 220  | H0 |
| ATOM 11431  | HG3  | ARG D 120 | -22.130 | 8.427  | 33.487 | 1.00 | 50.36 |      | H0 |
| ANISOU11431 | HG3  | ARG D 120 | 5930    | 7470   | 5740   | -270 | 550   | 120  | H0 |
| ATOM 11432  | HD2  | ARG D 120 | -24.017 | 7.076  | 33.632 | 1.00 | 52.69 |      | H0 |
| ANISOU11432 | HD2  | ARG D 120 | 6320    | 7660   | 6040   | -350 | 620   | 300  | H0 |
| ATOM 11433  | HD3  | ARG D 120 | -23.232 | 5.851  | 33.004 | 1.00 | 53.24 |      | H0 |
| ANISOU11433 | HD3  | ARG D 120 | 6480    | 7550   | 6200   | -310 | 650   | 380  | H0 |
| ATOM 11434  | HE   | ARG D 120 | -22.511 | 5.364  | 35.016 | 1.00 | 56.77 |      | H0 |
| ANISOU11434 | HE   | ARG D 120 | 6840    | 8230   | 6500   | -150 | 620   | 550  | H0 |
| ATOM 11435  | HH11 | ARG D 120 | -23.373 | 8.583  | 35.199 | 1.00 | 55.92 |      | H0 |
| ANISOU11435 | HH11 | ARG D 120 | 6580    | 8390   | 6280   | -270 | 550   | 200  | H0 |
| ATOM 11436  | HH12 | ARG D 120 | -23.124 | 8.719  | 36.690 | 1.00 | 57.13 |      | H0 |
| ANISOU11436 | HH12 | ARG D 120 | 6660    | 8760   | 6280   | -200 | 520   | 240  | H0 |
| ATOM 11437  | HH21 | ARG D 120 | -22.151 | 5.597  | 37.231 | 1.00 | 60.39 |      | H0 |
| ANISOU11437 | HH21 | ARG D 120 | 7180    | 9040   | 6730   | -30  | 570   | 660  | H0 |
| ATOM 11438  | HH22 | ARG D 120 | -22.397 | 6.945  | 37.906 | 1.00 | 60.01 |      | H0 |
| ANISOU11438 | HH22 | ARG D 120 | 7040    | 9210   | 6560   | -60  | 530   | 520  | H0 |
| ATOM 11439  | N    | PHE D 121 | -19.550 | 9.655  | 31.511 | 1.00 | 44.00 |      | N0 |
| ANISOU11439 | N    | PHE D 121 | 5050    | 6590   | 5070   | -260 | 530   | -100 | N0 |
| ATOM 11440  | CA   | PHE D 121 | -18.106 | 9.858  | 31.232 | 1.00 | 44.13 |      | C0 |
| ANISOU11440 | CA   | PHE D 121 | 4990    | 6660   | 5110   | -220 | 520   | -140 | C0 |
| ATOM 11441  | C    | PHE D 121 | -17.246 | 9.252  | 32.340 | 1.00 | 45.93 |      | C0 |
| ANISOU11441 | C    | PHE D 121 | 5130    | 7050   | 5280   | -110 | 480   | -50  | C0 |
| ATOM 11442  | O    | PHE D 121 | -17.648 | 9.299  | 33.514 | 1.00 | 46.08 |      | O0 |
| ANISOU11442 | O    | PHE D 121 | 5120    | 7190   | 5200   | -90  | 440   | -10  | O0 |
| ATOM 11443  | CB   | PHE D 121 | -17.797 | 11.347 | 31.090 | 1.00 | 43.37 |      | C0 |
| ANISOU11443 | CB   | PHE D 121 | 4830    | 6630   | 5010   | -310 | 490   | -280 | C0 |
| ATOM 11444  | CG   | PHE D 121 | -18.411 | 11.971 | 29.867 | 1.00 | 42.23 |      | C0 |
| ANISOU11444 | CG   | PHE D 121 | 4770    | 6340   | 4940   | -400 | 530   | -350 | C0 |
| ATOM 11445  | CD1  | PHE D 121 | -17.850 | 11.760 | 28.619 | 1.00 | 41.79 |      | C0 |
| ANISOU11445 | CD1  | PHE D 121 | 4740    | 6180   | 4960   | -410 | 570   | -360 | C0 |
| ATOM 11446  | CD2  | PHE D 121 | -19.559 | 12.741 | 29.959 | 1.00 | 41.69 |      | C0 |

|             |               |         |        |        |      |       |      |    |
|-------------|---------------|---------|--------|--------|------|-------|------|----|
| ANISOU11446 | CD2 PHE D 121 | 4750    | 6240   | 4850   | -460 | 520   | -400 | C0 |
| ATOM 11447  | CE1 PHE D 121 | -18.422 | 12.317 | 27.487 | 1.00 | 40.74 |      | C0 |
| ANISOU11447 | CE1 PHE D 121 | 4680    | 5930   | 4870   | -490 | 610   | -410 | C0 |
| ATOM 11448  | CE2 PHE D 121 | -20.129 | 13.294 | 28.822 | 1.00 | 41.15 |      | C0 |
| ANISOU11448 | CE2 PHE D 121 | 4750    | 6050   | 4840   | -530 | 550   | -440 | C0 |
| ATOM 11449  | CZ PHE D 121  | -19.561 | 13.077 | 27.588 | 1.00 | 40.01 |      | C0 |
| ANISOU11449 | CZ PHE D 121  | 4630    | 5810   | 4760   | -540 | 590   | -440 | C0 |
| ATOM 11450  | H PHE D 121   | -19.764 | 9.838  | 32.377 | 1.00 | 44.43 |      | H0 |
| ANISOU11450 | H PHE D 121   | 5070    | 6750   | 5060   | -250 | 510   | -90  | H0 |
| ATOM 11451  | HA PHE D 121  | -17.882 | 9.406  | 30.379 | 1.00 | 44.08 |      | H0 |
| ANISOU11451 | HA PHE D 121  | 5020    | 6550   | 5170   | -210 | 560   | -130 | H0 |
| ATOM 11452  | HB2 PHE D 121 | -18.127 | 11.812 | 31.886 | 1.00 | 43.61 |      | H0 |
| ANISOU11452 | HB2 PHE D 121 | 4840    | 6750   | 4980   | -330 | 450   | -310 | H0 |
| ATOM 11453  | HB3 PHE D 121 | -16.824 | 11.463 | 31.053 | 1.00 | 43.97 |      | H0 |
| ANISOU11453 | HB3 PHE D 121 | 4830    | 6770   | 5100   | -290 | 480   | -300 | H0 |
| ATOM 11454  | HD1 PHE D 121 | -17.072 | 11.233 | 28.541 | 1.00 | 42.35 |      | H0 |
| ANISOU11454 | HD1 PHE D 121 | 4770    | 6280   | 5040   | -350 | 590   | -330 | H0 |
| ATOM 11455  | HD2 PHE D 121 | -19.958 | 12.887 | 30.802 | 1.00 | 41.93 |      | H0 |
| ANISOU11455 | HD2 PHE D 121 | 4760    | 6340   | 4830   | -450 | 490   | -400 | H0 |
| ATOM 11456  | HE1 PHE D 121 | -18.031 | 12.167 | 26.649 | 1.00 | 40.81 |      | H0 |
| ANISOU11456 | HE1 PHE D 121 | 4710    | 5890   | 4910   | -490 | 640   | -410 | H0 |
| ATOM 11457  | HE2 PHE D 121 | -20.908 | 13.820 | 28.896 | 1.00 | 40.58 |      | H0 |
| ANISOU11457 | HE2 PHE D 121 | 4700    | 5960   | 4760   | -550 | 540   | -470 | H0 |
| ATOM 11458  | HZ PHE D 121  | -19.945 | 13.461 | 26.816 | 1.00 | 39.87 |      | H0 |
| ANISOU11458 | HZ PHE D 121  | 4670    | 5720   | 4760   | -590 | 600   | -470 | H0 |
| ATOM 11459  | N SER D 122   | -16.089 | 8.714  | 31.949 | 1.00 | 47.17 |      | N0 |
| ANISOU11459 | N SER D 122   | 5230    | 7220   | 5480   | -20  | 500   | -20  | N0 |
| ATOM 11460  | CA SER D 122  | -14.948 | 8.393  | 32.841 | 1.00 | 49.15 |      | C0 |
| ANISOU11460 | CA SER D 122  | 5350    | 7660   | 5670   | 100  | 450   | 50   | C0 |
| ATOM 11461  | C SER D 122   | -14.044 | 9.625  | 32.938 | 1.00 | 49.67 |      | C0 |
| ANISOU11461 | C SER D 122   | 5270    | 7900   | 5710   | 20   | 390   | -80  | C0 |
| ATOM 11462  | O SER D 122   | -13.445 | 9.994  | 31.917 | 1.00 | 49.21 |      | O0 |
| ANISOU11462 | O SER D 122   | 5180    | 7790   | 5730   | -20  | 430   | -140 | O0 |
| ATOM 11463  | CB SER D 122  | -14.193 | 7.202  | 32.340 | 1.00 | 50.10 |      | C0 |
| ANISOU11463 | CB SER D 122  | 5480    | 7700   | 5850   | 250  | 500   | 160  | C0 |
| ATOM 11464  | OG SER D 122  | -13.146 | 6.868  | 33.234 | 1.00 | 52.09 |      | O0 |
| ANISOU11464 | OG SER D 122  | 5590    | 8160   | 6040   | 380  | 450   | 240  | O0 |
| ATOM 11465  | H SER D 122   | -15.913 | 8.501  | 31.081 | 1.00 | 46.90 |      | H0 |
| ANISOU11465 | H SER D 122   | 5230    | 7080   | 5510   | -20  | 540   | -30  | H0 |
| ATOM 11466  | HA SER D 122  | -15.305 | 8.188  | 33.746 | 1.00 | 49.56 |      | H0 |
| ANISOU11466 | HA SER D 122  | 5400    | 7790   | 5640   | 130  | 420   | 110  | H0 |
| ATOM 11467  | HB2 SER D 122 | -14.808 | 6.439  | 32.253 | 1.00 | 50.11 |      | H0 |
| ANISOU11467 | HB2 SER D 122 | 5590    | 7570   | 5880   | 270  | 540   | 230  | H0 |
| ATOM 11468  | HB3 SER D 122 | -13.819 | 7.399  | 31.451 | 1.00 | 49.84 |      | H0 |
| ANISOU11468 | HB3 SER D 122 | 5440    | 7610   | 5880   | 220  | 540   | 90   | H0 |
| ATOM 11469  | N CYS D 123   | -13.984 | 10.258 | 34.109 | 1.00 | 51.13 |      | N0 |
| ANISOU11469 | N CYS D 123   | 5370    | 8270   | 5780   | -10  | 310   | -110 | N0 |
| ATOM 11470  | CA CYS D 123  | -13.148 | 11.462 | 34.358 | 1.00 | 52.67 |      | C0 |
| ANISOU11470 | CA CYS D 123  | 5430    | 8630   | 5950   | -110 | 240   | -250 | C0 |
| ATOM 11471  | C CYS D 123   | -12.901 | 11.620 | 35.859 | 1.00 | 53.50 |      | C0 |
| ANISOU11471 | C CYS D 123   | 5440    | 8990   | 5900   | -80  | 140   | -250 | C0 |
| ATOM 11472  | O CYS D 123   | -13.557 | 10.906 | 36.643 | 1.00 | 53.41 |      | O0 |
| ANISOU11472 | O CYS D 123   | 5480    | 9010   | 5800   | 10   | 130   | -140 | O0 |
| ATOM 11473  | CB CYS D 123  | -13.793 | 12.712 | 33.771 | 1.00 | 52.58 |      | C0 |

|             |     |           |         |        |        |      |       |      |    |
|-------------|-----|-----------|---------|--------|--------|------|-------|------|----|
| ANISOU11473 | CB  | CYS D 123 | 5500    | 8500   | 5990   | -270 | 260   | -400 | C0 |
| ATOM 11474  | SG  | CYS D 123 | -15.407 | 13.114 | 34.486 | 1.00 | 54.23 |      | S0 |
| ANISOU11474 | SG  | CYS D 123 | 5830    | 8650   | 6120   | -310 | 250   | -440 | S0 |
| ATOM 11475  | H   | CYS D 123 | -14.457 | 10.001 | 34.845 | 1.00 | 51.40 |      | H0 |
| ANISOU11475 | H   | CYS D 123 | 5430    | 8350   | 5750   | 30   | 290   | -60  | H0 |
| ATOM 11476  | HA  | CYS D 123 | -12.280 | 11.323 | 33.913 | 1.00 | 53.09 |      | H0 |
| ANISOU11476 | HA  | CYS D 123 | 5400    | 8720   | 6050   | -80  | 250   | -240 | H0 |
| ATOM 11477  | HB2 | CYS D 123 | -13.197 | 13.474 | 33.911 | 1.00 | 53.48 |      | H0 |
| ANISOU11477 | HB2 | CYS D 123 | 5530    | 8700   | 6090   | -350 | 220   | -490 | H0 |
| ATOM 11478  | HB3 | CYS D 123 | -13.903 | 12.591 | 32.805 | 1.00 | 52.12 |      | H0 |
| ANISOU11478 | HB3 | CYS D 123 | 5490    | 8300   | 6010   | -290 | 320   | -400 | H0 |
| ATOM 11479  | N   | ASP D 124 | -11.964 | 12.502 | 36.226 | 1.00 | 54.44 |      | N0 |
| ANISOU11479 | N   | ASP D 124 | 5410    | 9300   | 5970   | -160 | 60    | -360 | N0 |
| ATOM 11480  | CA  | ASP D 124 | -11.508 | 12.718 | 37.624 | 1.00 | 55.33 |      | C0 |
| ANISOU11480 | CA  | ASP D 124 | 5400    | 9700   | 5920   | -140 | -60   | -380 | C0 |
| ATOM 11481  | C   | ASP D 124 | -12.636 | 13.390 | 38.413 | 1.00 | 54.77 |      | C0 |
| ANISOU11481 | C   | ASP D 124 | 5440    | 9620   | 5750   | -210 | -80   | -480 | C0 |
| ATOM 11482  | O   | ASP D 124 | -12.869 | 14.597 | 38.200 | 1.00 | 55.02 |      | O0 |
| ANISOU11482 | O   | ASP D 124 | 5510    | 9580   | 5810   | -360 | -80   | -660 | O0 |
| ATOM 11483  | CB  | ASP D 124 | -10.227 | 13.555 | 37.686 | 1.00 | 56.40 |      | C0 |
| ANISOU11483 | CB  | ASP D 124 | 5350    | 10030  | 6050   | -250 | -140  | -500 | C0 |
| ATOM 11484  | CG  | ASP D 124 | -9.554  | 13.553 | 39.050 | 1.00 | 58.31 |      | C0 |
| ANISOU11484 | CG  | ASP D 124 | 5440    | 10600  | 6110   | -210 | -270  | -500 | C0 |
| ATOM 11485  | OD1 | ASP D 124 | -10.147 | 13.004 | 40.005 | 1.00 | 58.05 |      | O0 |
| ANISOU11485 | OD1 | ASP D 124 | 5460    | 10650  | 5940   | -110 | -300  | -410 | O0 |
| ATOM 11486  | OD2 | ASP D 124 | -8.442  | 14.106 | 39.148 | 1.00 | 59.61 |      | O0 |
| ANISOU11486 | OD2 | ASP D 124 | 5430    | 10960  | 6260   | -300 | -350  | -590 | O0 |
| ATOM 11487  | H   | ASP D 124 | -11.541 | 13.037 | 35.621 | 1.00 | 54.13 |      | H0 |
| ANISOU11487 | H   | ASP D 124 | 5340    | 9230   | 6000   | -240 | 70    | -430 | H0 |
| ATOM 11488  | HA  | ASP D 124 | -11.322 | 11.837 | 38.026 | 1.00 | 56.08 |      | H0 |
| ANISOU11488 | HA  | ASP D 124 | 5470    | 9870   | 5970   | -10  | -70   | -250 | H0 |
| ATOM 11489  | HB2 | ASP D 124 | -9.590  | 13.217 | 37.027 | 1.00 | 56.49 |      | H0 |
| ANISOU11489 | HB2 | ASP D 124 | 5300    | 10020  | 6140   | -210 | -110  | -450 | H0 |
| ATOM 11490  | HB3 | ASP D 124 | -10.439 | 14.481 | 37.452 | 1.00 | 55.97 |      | H0 |
| ANISOU11490 | HB3 | ASP D 124 | 5340    | 9900   | 6030   | -390 | -140  | -640 | H0 |
| ATOM 11491  | N   | VAL D 125 | -13.287 | 12.626 | 39.293 | 1.00 | 54.14 |      | N0 |
| ANISOU11491 | N   | VAL D 125 | 5410    | 9610   | 5550   | -100 | -80   | -350 | N0 |
| ATOM 11492  | CA  | VAL D 125 | -14.408 | 13.076 | 40.168 | 1.00 | 53.39 |      | C0 |
| ANISOU11492 | CA  | VAL D 125 | 5400    | 9550   | 5330   | -130 | -80   | -410 | C0 |
| ATOM 11493  | C   | VAL D 125 | -13.864 | 13.429 | 41.561 | 1.00 | 54.90 |      | C0 |
| ANISOU11493 | C   | VAL D 125 | 5490    | 10060  | 5310   | -120 | -200  | -470 | C0 |
| ATOM 11494  | O   | VAL D 125 | -14.629 | 14.003 | 42.351 | 1.00 | 54.52 |      | O0 |
| ANISOU11494 | O   | VAL D 125 | 5500    | 10080  | 5140   | -150 | -210  | -570 | O0 |
| ATOM 11495  | CB  | VAL D 125 | -15.499 | 11.990 | 40.232 | 1.00 | 53.06 |      | C0 |
| ANISOU11495 | CB  | VAL D 125 | 5480    | 9400   | 5290   | -20  | 0     | -230 | C0 |
| ATOM 11496  | CG1 | VAL D 125 | -16.570 | 12.298 | 41.265 | 1.00 | 53.95 |      | C0 |
| ANISOU11496 | CG1 | VAL D 125 | 5650    | 9600   | 5240   | -20  | 0     | -260 | C0 |
| ATOM 11497  | CG2 | VAL D 125 | -16.128 | 11.759 | 38.867 | 1.00 | 51.41 |      | C0 |
| ANISOU11497 | CG2 | VAL D 125 | 5380    | 8890   | 5260   | -60  | 100   | -210 | C0 |
| ATOM 11498  | H   | VAL D 125 | -13.079 | 11.747 | 39.414 | 1.00 | 54.63 |      | H0 |
| ANISOU11498 | H   | VAL D 125 | 5450    | 9710   | 5600   | 10   | -70   | -210 | H0 |
| ATOM 11499  | HA  | VAL D 125 | -14.797 | 13.880 | 39.778 | 1.00 | 52.71 |      | H0 |
| ANISOU11499 | HA  | VAL D 125 | 5380    | 9360   | 5300   | -220 | -60   | -540 | H0 |
| ATOM 11500  | HB  | VAL D 125 | -15.060 | 11.148 | 40.504 | 1.00 | 53.93 |      | H0 |

|                            |         |        |        |      |       |       |    |
|----------------------------|---------|--------|--------|------|-------|-------|----|
| ANISOU11500 HB VAL D 125   | 5540    | 9580   | 5370   | 80   | -10   | -90   | H0 |
| ATOM 11501 HG11 VAL D 125  | -16.206 | 12.179 | 42.159 | 1.00 | 55.16 |       | H0 |
| ANISOU11501 HG11 VAL D 125 | 5740    | 9960   | 5260   | 20   | -60   | -230  | H0 |
| ATOM 11502 HG12 VAL D 125  | -17.321 | 11.693 | 41.143 | 1.00 | 53.26 |       | H0 |
| ANISOU11502 HG12 VAL D 125 | 5630    | 9420   | 5180   | 10   | 60    | -150  | H0 |
| ATOM 11503 HG13 VAL D 125  | -16.871 | 13.217 | 41.157 | 1.00 | 53.41 |       | H0 |
| ANISOU11503 HG13 VAL D 125 | 5610    | 9500   | 5180   | -110 | 0     | -410  | H0 |
| ATOM 11504 HG21 VAL D 125  | -16.408 | 12.611 | 38.491 | 1.00 | 50.64 |       | H0 |
| ANISOU11504 HG21 VAL D 125 | 5320    | 8720   | 5210   | -150 | 110   | -340  | H0 |
| ATOM 11505 HG22 VAL D 125  | -16.902 | 11.175 | 38.958 | 1.00 | 51.01 |       | H0 |
| ANISOU11505 HG22 VAL D 125 | 5400    | 8770   | 5210   | -20  | 150   | -110  | H0 |
| ATOM 11506 HG23 VAL D 125  | -15.478 | 11.343 | 38.276 | 1.00 | 51.30 |       | H0 |
| ANISOU11506 HG23 VAL D 125 | 5340    | 8820   | 5330   | -30  | 110   | -160  | H0 |
| ATOM 11507 N SER D 126     | -12.594 | 13.116 | 41.851 | 1.00 | 56.29 |       | N0 |
| ANISOU11507 N SER D 126    | 5500    | 10450  | 5440   | -70  | -290  | -420  | N0 |
| ATOM 11508 CA SER D 126    | -11.934 | 13.398 | 43.156 | 1.00 | 58.51 |       | C0 |
| ANISOU11508 CA SER D 126   | 5650    | 11070  | 5510   | -70  | -420  | -470  | C0 |
| ATOM 11509 C SER D 126     | -12.038 | 14.896 | 43.470 | 1.00 | 58.52 |       | C0 |
| ANISOU11509 C SER D 126    | 5670    | 11110  | 5460   | -250 | -480  | -760  | C0 |
| ATOM 11510 O SER D 126     | -11.782 | 15.713 | 42.562 | 1.00 | 57.78 |       | O0 |
| ANISOU11510 O SER D 126    | 5590    | 10850  | 5520   | -400 | -450  | -900  | O0 |
| ATOM 11511 CB SER D 126    | -10.496 | 12.916 | 43.181 | 1.00 | 60.10 |       | C0 |
| ANISOU11511 CB SER D 126   | 5650    | 11480  | 5700   | 0    | -500  | -390  | C0 |
| ATOM 11512 OG SER D 126    | -9.669  | 13.699 | 42.334 | 1.00 | 59.75 |       | O0 |
| ANISOU11512 OG SER D 126   | 5510    | 11390  | 5800   | -140 | -520  | -530  | O0 |
| ATOM 11513 H SER D 126     | -12.034 | 12.701 | 41.266 | 1.00 | 56.17 |       | H0 |
| ANISOU11513 H SER D 126    | 5430    | 10390  | 5520   | -30  | -270  | -360  | H0 |
| ATOM 11514 HA SER D 126    | -12.436 | 12.903 | 43.858 | 1.00 | 58.89 |       | H0 |
| ANISOU11514 HA SER D 126   | 5740    | 11200  | 5440   | 20   | -420  | -380  | H0 |
| ATOM 11515 HB2 SER D 126   | -10.155 | 12.962 | 44.103 | 1.00 | 61.72 |       | H0 |
| ANISOU11515 HB2 SER D 126  | 5770    | 11930  | 5750   | 30   | -600  | -390  | H0 |
| ATOM 11516 HB3 SER D 126   | -10.464 | 11.976 | 42.891 | 1.00 | 59.78 |       | H0 |
| ANISOU11516 HB3 SER D 126  | 5620    | 11380  | 5720   | 130  | -450  | -210  | H0 |
| ATOM 11517 N GLY D 127     | -12.446 | 15.231 | 44.696 | 1.00 | 59.60 |       | N0 |
| ANISOU11517 N GLY D 127    | 5820    | 11440  | 5380   | -250 | -540  | -830  | N0 |
| ATOM 11518 CA GLY D 127    | -12.520 | 16.614 | 45.206 | 1.00 | 60.60 |       | C0 |
| ANISOU11518 CA GLY D 127   | 5980    | 11630  | 5420   | -410 | -600  | -1120 | C0 |
| ATOM 11519 C GLY D 127     | -13.834 | 17.301 | 44.861 | 1.00 | 58.91 |       | C0 |
| ANISOU11519 C GLY D 127    | 5960    | 11150  | 5270   | -460 | -490  | -1230 | C0 |
| ATOM 11520 O GLY D 127     | -13.940 | 18.513 | 45.127 | 1.00 | 59.28 |       | O0 |
| ANISOU11520 O GLY D 127    | 6070    | 11170  | 5280   | -590 | -520  | -1480 | O0 |
| ATOM 11521 H GLY D 127     | -12.708 | 14.604 | 45.303 | 1.00 | 60.19 |       | H0 |
| ANISOU11521 H GLY D 127    | 5900    | 11630  | 5340   | -140 | -540  | -710  | H0 |
| ATOM 11522 HA2 GLY D 127   | -12.409 | 16.597 | 46.188 | 1.00 | 62.17 |       | H0 |
| ANISOU11522 HA2 GLY D 127  | 6140    | 12060  | 5430   | -380 | -670  | -1140 | H0 |
| ATOM 11523 HA3 GLY D 127   | -11.770 | 17.136 | 44.825 | 1.00 | 60.97 |       | H0 |
| ANISOU11523 HA3 GLY D 127  | 5960    | 11670  | 5540   | -520 | -640  | -1220 | H0 |
| ATOM 11524 N VAL D 128     | -14.808 | 16.567 | 44.309 | 1.00 | 57.01 |       | N0 |
| ANISOU11524 N VAL D 128    | 5820    | 10710  | 5130   | -360 | -370  | -1060 | N0 |
| ATOM 11525 CA VAL D 128    | -16.172 | 17.091 | 43.987 | 1.00 | 56.01 |       | C0 |
| ANISOU11525 CA VAL D 128   | 5860    | 10360  | 5060   | -370 | -260  | -1140 | C0 |
| ATOM 11526 C VAL D 128     | -16.783 | 17.700 | 45.258 | 1.00 | 57.98 |       | C0 |
| ANISOU11526 C VAL D 128    | 6160    | 10790  | 5080   | -360 | -280  | -1280 | C0 |
| ATOM 11527 O VAL D 128     | -17.485 | 18.721 | 45.143 | 1.00 | 57.71 |       | O0 |



|                            |                                  |     |
|----------------------------|----------------------------------|-----|
| ANISOU11527 O VAL D 128    | 6230 10610 5080 -410 -240 -1460  | O O |
| ATOM 11528 CB VAL D 128    | -17.087 16.010 43.371 1.00 54.06 | C O |
| ANISOU11528 CB VAL D 128   | 5680 9950 4910 -260 -140 -910    | C O |
| ATOM 11529 CG1 VAL D 128   | -17.337 14.838 44.309 1.00 54.77 | C O |
| ANISOU11529 CG1 VAL D 128  | 5740 10230 4840 -130 -140 -690   | C O |
| ATOM 11530 CG2 VAL D 128   | -18.405 16.601 42.901 1.00 52.80 | C O |
| ANISOU11530 CG2 VAL D 128  | 5660 9580 4830 -290 -40 -980     | C O |
| ATOM 11531 H VAL D 128     | -14.695 15.694 44.082 1.00 56.66 | H O |
| ANISOU11531 H VAL D 128    | 5750 10660 5120 -270 -340 -890   | H O |
| ATOM 11532 HA VAL D 128    | -16.069 17.805 43.333 1.00 55.43 | H O |
| ANISOU11532 HA VAL D 128   | 5820 10140 5100 -460 -250 -1250  | H O |
| ATOM 11533 HB VAL D 128    | -16.621 15.657 42.574 1.00 53.27 | H O |
| ANISOU11533 HB VAL D 128   | 5550 9740 4940 -270 -130 -840    | H O |
| ATOM 11534 HG11 VAL D 128  | -16.488 14.495 44.639 1.00 55.84 | H O |
| ANISOU11534 HG11 VAL D 128 | 5780 10520 4910 -100 -210 -640   | H O |
| ATOM 11535 HG12 VAL D 128  | -17.804 14.132 43.828 1.00 53.80 | H O |
| ANISOU11535 HG12 VAL D 128 | 5660 9980 4800 -80 -70 -550      | H O |
| ATOM 11536 HG13 VAL D 128  | -17.881 15.131 45.060 1.00 55.58 | H O |
| ANISOU11536 HG13 VAL D 128 | 5870 10440 4800 -110 -140 -750   | H O |
| ATOM 11537 HG21 VAL D 128  | -18.956 16.824 43.671 1.00 53.57 | H O |
| ANISOU11537 HG21 VAL D 128 | 5780 9780 4790 -260 -40 -1030    | H O |
| ATOM 11538 HG22 VAL D 128  | -18.873 15.954 42.347 1.00 51.67 | H O |
| ANISOU11538 HG22 VAL D 128 | 5550 9320 4770 -250 20 -850      | H O |
| ATOM 11539 HG23 VAL D 128  | -18.233 17.406 42.382 1.00 52.48 | H O |
| ANISOU11539 HG23 VAL D 128 | 5640 9420 4880 -370 -50 -1110    | H O |
| ATOM 11540 N ASP D 129     | -16.505 17.108 46.422 1.00 60.44 | N O |
| ANISOU11540 N ASP D 129    | 6390 11400 5170 -270 -350 -1190  | N O |
| ATOM 11541 CA ASP D 129    | -17.010 17.561 47.745 1.00 63.23 | C O |
| ANISOU11541 CA ASP D 129   | 6780 11990 5260 -240 -370 -1310  | C O |
| ATOM 11542 C ASP D 129     | -15.901 18.338 48.474 1.00 65.76 | C O |
| ANISOU11542 C ASP D 129    | 7010 12540 5430 -350 -530 -1530  | C O |
| ATOM 11543 O ASP D 129     | -15.559 17.957 49.614 1.00 68.46 | O O |
| ANISOU11543 O ASP D 129    | 7280 13210 5520 -280 -610 -1490  | O O |
| ATOM 11544 CB ASP D 129    | -17.530 16.359 48.542 1.00 64.12 | C O |
| ANISOU11544 CB ASP D 129   | 6870 12290 5200 -80 -340 -1060   | C O |
| ATOM 11545 CG ASP D 129    | -18.337 16.709 49.785 1.00 66.14 | C O |
| ANISOU11545 CG ASP D 129   | 7180 12760 5190 -30 -320 -1140   | C O |
| ATOM 11546 OD1 ASP D 129   | -18.346 17.900 50.178 1.00 66.91 | O O |
| ANISOU11546 OD1 ASP D 129  | 7320 12890 5210 -110 -350 -1430  | O O |
| ATOM 11547 OD2 ASP D 129   | -18.947 15.777 50.355 1.00 66.89 | O O |
| ANISOU11547 OD2 ASP D 129  | 7270 12980 5160 90 -260 -920     | O O |
| ATOM 11548 H ASP D 129     | -15.987 16.361 46.475 1.00 60.71 | H O |
| ANISOU11548 H ASP D 129    | 6350 11530 5190 -220 -380 -1050  | H O |
| ATOM 11549 HA ASP D 129    | -17.767 18.173 47.592 1.00 62.64 | H O |
| ANISOU11549 HA ASP D 129   | 6800 11780 5220 -260 -310 -1420  | H O |
| ATOM 11550 HB2 ASP D 129   | -18.099 15.819 47.956 1.00 62.65 | H O |
| ANISOU11550 HB2 ASP D 129  | 6730 11940 5140 -40 -250 -920    | H O |
| ATOM 11551 HB3 ASP D 129   | -16.771 15.808 48.818 1.00 65.00 | H O |
| ANISOU11551 HB3 ASP D 129  | 6890 12550 5260 -50 -410 -950    | H O |
| ATOM 11552 N THR D 130     | -15.370 19.397 47.849 1.00 65.67 | N O |
| ANISOU11552 N THR D 130    | 7020 12370 5570 -510 -560 -1750  | N O |
| ATOM 11553 CA THR D 130    | -14.365 20.326 48.439 1.00 68.14 | C O |
| ANISOU11553 CA THR D 130   | 7260 12860 5770 -660 -700 -2000  | C O |
| ATOM 11554 C THR D 130     | -14.593 21.749 47.917 1.00 68.75 | C O |

|             |      |           |         |        |        |       |       |       |    |
|-------------|------|-----------|---------|--------|--------|-------|-------|-------|----|
| ANISOU11554 | C    | THR D 130 | 7480    | 12660  | 5980   | -820  | -670  | -2280 | C0 |
| ATOM 11555  | O    | THR D 130 | -15.374 | 21.913 | 46.960 | 1.00  | 66.15 |       | O0 |
| ANISOU11555 | O    | THR D 130 | 7260    | 12010  | 5860   | -800  | -550  | -2240 | O0 |
| ATOM 11556  | CB   | THR D 130 | -12.927 | 19.893 | 48.123 | 1.00  | 68.54 |       | C0 |
| ANISOU11556 | CB   | THR D 130 | 7120    | 13050  | 5880   | -720  | -820  | -1910 | C0 |
| ATOM 11557  | OG1  | THR D 130 | -12.679 | 20.082 | 46.728 | 1.00  | 66.02 |       | O0 |
| ANISOU11557 | OG1  | THR D 130 | 6810    | 12420  | 5850   | -810  | -750  | -1890 | O0 |
| ATOM 11558  | CG2  | THR D 130 | -12.639 | 18.457 | 48.504 | 1.00  | 68.53 |       | C0 |
| ANISOU11558 | CG2  | THR D 130 | 6990    | 13270  | 5770   | -540  | -840  | -1610 | C0 |
| ATOM 11559  | H    | THR D 130 | -15.593 | 19.626 | 46.996 | 1.00  | 64.25 |       | H0 |
| ANISOU11559 | H    | THR D 130 | 6890    | 11960  | 5560   | -550  | -500  | -1760 | H0 |
| ATOM 11560  | HA   | THR D 130 | -14.485 | 20.327 | 49.417 | 1.00  | 69.80 |       | H0 |
| ANISOU11560 | HA   | THR D 130 | 7470    | 13290  | 5770   | -620  | -750  | -2050 | H0 |
| ATOM 11561  | HB   | THR D 130 | -12.319 | 20.479 | 48.630 | 1.00  | 70.29 |       | H0 |
| ANISOU11561 | HB   | THR D 130 | 7290    | 13420  | 6000   | -830  | -920  | -2080 | H0 |
| ATOM 11562  | HG21 | THR D 130 | -12.916 | 18.303 | 49.424 | 1.00  | 69.80 |       | H0 |
| ANISOU11562 | HG21 | THR D 130 | 7160    | 13630  | 5730   | -470  | -870  | -1600 | H0 |
| ATOM 11563  | HG22 | THR D 130 | -11.684 | 18.283 | 48.420 | 1.00  | 69.37 |       | H0 |
| ANISOU11563 | HG22 | THR D 130 | 6960    | 13500  | 5900   | -570  | -920  | -1580 | H0 |
| ATOM 11564  | HG23 | THR D 130 | -13.130 | 17.859 | 47.914 | 1.00  | 66.81 |       | H0 |
| ANISOU11564 | HG23 | THR D 130 | 6820    | 12890  | 5680   | -460  | -740  | -1450 | H0 |
| ATOM 11565  | N    | GLU D 131 | -13.911 | 22.731 | 48.515 | 1.00  | 72.37 |       | N0 |
| ANISOU11565 | N    | GLU D 131 | 7920    | 13230  | 6340   | -980  | -790  | -2550 | N0 |
| ATOM 11566  | CA   | GLU D 131 | -13.941 | 24.155 | 48.082 | 1.00  | 73.71 |       | C0 |
| ANISOU11566 | CA   | GLU D 131 | 8230    | 13130  | 6650   | -1160 | -770  | -2840 | C0 |
| ATOM 11567  | C    | GLU D 131 | -13.432 | 24.260 | 46.638 | 1.00  | 71.58 |       | C0 |
| ANISOU11567 | C    | GLU D 131 | 7930    | 12590  | 6680   | -1270 | -730  | -2760 | C0 |
| ATOM 11568  | O    | GLU D 131 | -14.089 | 24.946 | 45.834 | 1.00  | 69.99 |       | O0 |
| ANISOU11568 | O    | GLU D 131 | 7890    | 12040  | 6660   | -1300 | -620  | -2820 | O0 |
| ATOM 11569  | CB   | GLU D 131 | -13.103 | 25.032 | 49.016 | 1.00  | 78.03 |       | C0 |
| ANISOU11569 | CB   | GLU D 131 | 8740    | 13890  | 7020   | -1340 | -920  | -3130 | C0 |
| ATOM 11570  | CG   | GLU D 131 | -13.739 | 25.250 | 50.379 | 1.00  | 81.08 |       | C0 |
| ANISOU11570 | CG   | GLU D 131 | 9210    | 14490  | 7100   | -1250 | -940  | -3290 | C0 |
| ATOM 11571  | CD   | GLU D 131 | -13.169 | 26.412 | 51.178 | 1.00  | 85.20 |       | C0 |
| ANISOU11571 | CD   | GLU D 131 | 9780    | 15110  | 7480   | -1450 | -1070 | -3650 | C0 |
| ATOM 11572  | OE1  | GLU D 131 | -13.957 | 27.096 | 51.864 | 1.00  | 87.03 |       | O0 |
| ANISOU11572 | OE1  | GLU D 131 | 10190   | 15310  | 7570   | -1410 | -1020 | -3870 | O0 |
| ATOM 11573  | OE2  | GLU D 131 | -11.939 | 26.633 | 51.119 | 1.00  | 87.11 |       | O0 |
| ANISOU11573 | OE2  | GLU D 131 | 9880    | 15470  | 7750   | -1650 | -1210 | -3730 | O0 |
| ATOM 11574  | H    | GLU D 131 | -13.379 | 22.581 | 49.238 | 1.00  | 73.92 |       | H0 |
| ANISOU11574 | H    | GLU D 131 | 8030    | 13680  | 6380   | -990  | -880  | -2580 | H0 |
| ATOM 11575  | HA   | GLU D 131 | -14.874 | 24.465 | 48.110 | 1.00  | 73.17 |       | H0 |
| ANISOU11575 | HA   | GLU D 131 | 8300    | 12930  | 6580   | -1090 | -680  | -2890 | H0 |
| ATOM 11576  | HB2  | GLU D 131 | -12.225 | 24.614 | 49.136 | 1.00  | 78.72 |       | H0 |
| ANISOU11576 | HB2  | GLU D 131 | 8670    | 14170  | 7070   | -1380 | -1020 | -3060 | H0 |
| ATOM 11577  | HB3  | GLU D 131 | -12.965 | 25.903 | 48.587 | 1.00  | 78.39 |       | H0 |
| ANISOU11577 | HB3  | GLU D 131 | 8870    | 13730  | 7190   | -1480 | -910  | -3290 | H0 |
| ATOM 11578  | HG2  | GLU D 131 | -14.701 | 25.401 | 50.259 | 1.00  | 80.04 |       | H0 |
| ANISOU11578 | HG2  | GLU D 131 | 9210    | 14200  | 7000   | -1160 | -830  | -3290 | H0 |
| ATOM 11579  | HG3  | GLU D 131 | -13.635 | 24.431 | 50.910 | 1.00  | 81.22 |       | H0 |
| ANISOU11579 | HG3  | GLU D 131 | 9130    | 14760  | 6970   | -1150 | -980  | -3130 | H0 |
| ATOM 11580  | N    | SER D 132 | -12.311 | 23.601 | 46.326 | 1.00  | 71.71 |       | N0 |
| ANISOU11580 | N    | SER D 132 | 7750    | 12760  | 6740   | -1310 | -810  | -2610 | N0 |
| ATOM 11581  | CA   | SER D 132 | -11.603 | 23.696 | 45.021 | 1.00  | 70.90 |       | C0 |

|             |     |           |         |        |        |       |       |       |    |
|-------------|-----|-----------|---------|--------|--------|-------|-------|-------|----|
| ANISOU11581 | CA  | SER D 132 | 7580    | 12460  | 6900   | -1430 | -780  | -2540 | C0 |
| ATOM 11582  | C   | SER D 132 | -12.419 | 22.986 | 43.935 | 1.00  | 67.31 |       | C0 |
| ANISOU11582 | C   | SER D 132 | 7200    | 11750  | 6620   | -1280 | -630  | -2310 | C0 |
| ATOM 11583  | O   | SER D 132 | -12.335 | 23.409 | 42.767 | 1.00  | 65.27 |       | O0 |
| ANISOU11583 | O   | SER D 132 | 6990    | 11220  | 6580   | -1370 | -560  | -2310 | O0 |
| ATOM 11584  | CB  | SER D 132 | -10.200 | 23.136 | 45.102 | 1.00  | 72.84 |       | C0 |
| ANISOU11584 | CB  | SER D 132 | 7570    | 12990  | 7120   | -1490 | -900  | -2450 | C0 |
| ATOM 11585  | OG  | SER D 132 | -10.217 | 21.713 | 45.104 | 1.00  | 72.43 |       | O0 |
| ANISOU11585 | OG  | SER D 132 | 7420    | 13080  | 7020   | -1270 | -880  | -2170 | O0 |
| ATOM 11586  | H   | SER D 132 | -11.899 | 23.028 | 46.899 | 1.00  | 72.61 |       | H0 |
| ANISOU11586 | H   | SER D 132 | 7750    | 13120  | 6720   | -1260 | -880  | -2540 | H0 |
| ATOM 11587  | HA  | SER D 132 | -11.540 | 24.659 | 44.778 | 1.00  | 71.53 |       | H0 |
| ANISOU11587 | HA  | SER D 132 | 7740    | 12370  | 7060   | -1580 | -770  | -2720 | H0 |
| ATOM 11588  | HB2 | SER D 132 | -9.679  | 23.454 | 44.330 | 1.00  | 72.63 |       | H0 |
| ANISOU11588 | HB2 | SER D 132 | 7510    | 12840  | 7250   | -1610 | -880  | -2470 | H0 |
| ATOM 11589  | HB3 | SER D 132 | -9.764  | 23.463 | 45.918 | 1.00  | 74.95 |       | H0 |
| ANISOU11589 | HB3 | SER D 132 | 7780    | 13460  | 7240   | -1560 | -1000 | -2590 | H0 |
| ATOM 11590  | N   | GLY D 133 | -13.168 | 21.948 | 44.324 | 1.00  | 65.96 |       | N0 |
| ANISOU11590 | N   | GLY D 133 | 7040    | 11670  | 6350   | -1070 | -580  | -2130 | N0 |
| ATOM 11591  | CA  | GLY D 133 | -14.024 | 21.147 | 43.431 | 1.00  | 63.07 |       | C0 |
| ANISOU11591 | CA  | GLY D 133 | 6740    | 11100  | 6120   | -930  | -450  | -1910 | C0 |
| ATOM 11592  | C   | GLY D 133 | -13.230 | 20.081 | 42.695 | 1.00  | 61.95 |       | C0 |
| ANISOU11592 | C   | GLY D 133 | 6460    | 10990  | 6080   | -890  | -450  | -1680 | C0 |
| ATOM 11593  | O   | GLY D 133 | -11.995 | 20.021 | 42.880 | 1.00  | 63.56 |       | O0 |
| ANISOU11593 | O   | GLY D 133 | 6500    | 11390  | 6260   | -950  | -550  | -1700 | O0 |
| ATOM 11594  | H   | GLY D 133 | -13.184 | 21.663 | 45.188 | 1.00  | 67.02 |       | H0 |
| ANISOU11594 | H   | GLY D 133 | 7140    | 12010  | 6310   | -1010 | -630  | -2120 | H0 |
| ATOM 11595  | HA2 | GLY D 133 | -14.736 | 20.716 | 43.967 | 1.00  | 62.89 |       | H0 |
| ANISOU11595 | HA2 | GLY D 133 | 6760    | 11150  | 5990   | -820  | -420  | -1840 | H0 |
| ATOM 11596  | HA3 | GLY D 133 | -14.455 | 21.747 | 42.773 | 1.00  | 62.23 |       | H0 |
| ANISOU11596 | HA3 | GLY D 133 | 6740    | 10760  | 6140   | -990  | -390  | -1970 | H0 |
| ATOM 11597  | N   | ALA D 134 | -13.925 | 19.254 | 41.910 | 1.00  | 58.98 |       | N0 |
| ANISOU11597 | N   | ALA D 134 | 6150    | 10450  | 5820   | -770  | -340  | -1490 | N0 |
| ATOM 11598  | CA  | ALA D 134 | -13.347 | 18.253 | 40.985 | 1.00  | 57.84 |       | C0 |
| ANISOU11598 | CA  | ALA D 134 | 5920    | 10260  | 5800   | -710  | -310  | -1290 | C0 |
| ATOM 11599  | C   | ALA D 134 | -13.233 | 18.883 | 39.595 | 1.00  | 55.97 |       | C0 |
| ANISOU11599 | C   | ALA D 134 | 5740    | 9750   | 5780   | -820  | -240  | -1340 | C0 |
| ATOM 11600  | O   | ALA D 134 | -14.009 | 19.811 | 39.312 | 1.00  | 55.87 |       | O0 |
| ANISOU11600 | O   | ALA D 134 | 5860    | 9540   | 5830   | -890  | -190  | -1470 | O0 |
| ATOM 11601  | CB  | ALA D 134 | -14.210 | 17.015 | 40.959 | 1.00  | 56.35 |       | C0 |
| ANISOU11601 | CB  | ALA D 134 | 5790    | 10020  | 5600   | -530  | -230  | -1070 | C0 |
| ATOM 11602  | H   | ALA D 134 | -14.836 | 19.255 | 41.885 | 1.00  | 58.32 |       | H0 |
| ANISOU11602 | H   | ALA D 134 | 6170    | 10260  | 5730   | -720  | -280  | -1480 | H0 |
| ATOM 11603  | HA  | ALA D 134 | -12.444 | 18.011 | 41.300 | 1.00  | 58.86 |       | H0 |
| ANISOU11603 | HA  | ALA D 134 | 5920    | 10560  | 5880   | -710  | -380  | -1270 | H0 |
| ATOM 11604  | HB1 | ALA D 134 | -13.853 | 16.384 | 40.310 | 1.00  | 55.78 |       | H0 |
| ANISOU11604 | HB1 | ALA D 134 | 5680    | 9890   | 5620   | -490  | -200  | -960  | H0 |
| ATOM 11605  | HB2 | ALA D 134 | -14.216 | 16.603 | 41.838 | 1.00  | 57.35 |       | H0 |
| ANISOU11605 | HB2 | ALA D 134 | 5880    | 10330  | 5590   | -460  | -270  | -1020 | H0 |
| ATOM 11606  | HB3 | ALA D 134 | -15.118 | 17.255 | 40.708 | 1.00  | 55.42 |       | H0 |
| ANISOU11606 | HB3 | ALA D 134 | 5780    | 9750   | 5520   | -530  | -160  | -1100 | H0 |
| ATOM 11607  | N   | THR D 135 | -12.301 | 18.410 | 38.768 | 1.00  | 55.70 |       | N0 |
| ANISOU11607 | N   | THR D 135 | 5590    | 9710   | 5860   | -830  | -230  | -1250 | N0 |
| ATOM 11608  | CA  | THR D 135 | -12.162 | 18.844 | 37.353 | 1.00  | 55.07 |       | C0 |

|             |      |           |         |        |        |       |       |       |    |
|-------------|------|-----------|---------|--------|--------|-------|-------|-------|----|
| ANISOU11608 | CA   | THR D 135 | 5560    | 9390   | 5980   | -930  | -150  | -1260 | C0 |
| ATOM 11609  | C    | THR D 135 | -12.333 | 17.626 | 36.438 | 1.00  | 53.78 |       | C0 |
| ANISOU11609 | C    | THR D 135 | 5410    | 9120   | 5900   | -790  | -60   | -1060 | C0 |
| ATOM 11610  | O    | THR D 135 | -11.398 | 16.811 | 36.342 | 1.00  | 54.20 |       | O0 |
| ANISOU11610 | O    | THR D 135 | 5320    | 9310   | 5960   | -720  | -70   | -950  | O0 |
| ATOM 11611  | CB   | THR D 135 | -10.852 | 19.603 | 37.127 | 1.00  | 56.45 |       | C0 |
| ANISOU11611 | CB   | THR D 135 | 5600    | 9650   | 6200   | -1100 | -200  | -1360 | C0 |
| ATOM 11612  | OG1  | THR D 135 | -10.830 | 20.686 | 38.058 | 1.00  | 57.74 |       | O0 |
| ANISOU11612 | OG1  | THR D 135 | 5780    | 9890   | 6280   | -1230 | -290  | -1570 | O0 |
| ATOM 11613  | CG2  | THR D 135 | -10.729 | 20.141 | 35.719 | 1.00  | 55.68 |       | C0 |
| ANISOU11613 | CG2  | THR D 135 | 5550    | 9310   | 6290   | -1210 | -110  | -1370 | C0 |
| ATOM 11614  | H    | THR D 135 | -11.680 | 17.789 | 39.010 | 1.00  | 56.48 |       | H0 |
| ANISOU11614 | H    | THR D 135 | 5580    | 9960   | 5920   | -770  | -260  | -1160 | H0 |
| ATOM 11615  | HA   | THR D 135 | -12.899 | 19.465 | 37.165 | 1.00  | 54.37 |       | H0 |
| ANISOU11615 | HA   | THR D 135 | 5590    | 9140   | 5920   | -970  | -110  | -1330 | H0 |
| ATOM 11616  | HB   | THR D 135 | -10.097 | 18.996 | 37.313 | 1.00  | 57.18 |       | H0 |
| ANISOU11616 | HB   | THR D 135 | 5550    | 9910   | 6260   | -1050 | -240  | -1290 | H0 |
| ATOM 11617  | HG21 | THR D 135 | -10.557 | 19.407 | 35.103 | 1.00  | 54.89 |       | H0 |
| ANISOU11617 | HG21 | THR D 135 | 5420    | 9190   | 6240   | -1130 | -60   | -1250 | H0 |
| ATOM 11618  | HG22 | THR D 135 | -9.993  | 20.778 | 35.677 | 1.00  | 56.83 |       | H0 |
| ANISOU11618 | HG22 | THR D 135 | 5620    | 9500   | 6470   | -1340 | -150  | -1460 | H0 |
| ATOM 11619  | HG23 | THR D 135 | -11.557 | 20.588 | 35.467 | 1.00  | 54.78 |       | H0 |
| ANISOU11619 | HG23 | THR D 135 | 5580    | 9020   | 6210   | -1220 | -70   | -1410 | H0 |
| ATOM 11620  | N    | CYS D 136 | -13.504 | 17.514 | 35.812 | 1.00  | 53.03 |       | N0 |
| ANISOU11620 | N    | CYS D 136 | 5470    | 8800   | 5870   | -750  | 30    | -1010 | N0 |
| ATOM 11621  | CA   | CYS D 136 | -13.850 | 16.471 | 34.813 | 1.00  | 52.48 |       | C0 |
| ANISOU11621 | CA   | CYS D 136 | 5460    | 8590   | 5890   | -650  | 120   | -860  | C0 |
| ATOM 11622  | C    | CYS D 136 | -13.451 | 16.966 | 33.419 | 1.00  | 51.60 |       | C0 |
| ANISOU11622 | C    | CYS D 136 | 5360    | 8320   | 5930   | -740  | 180   | -880  | C0 |
| ATOM 11623  | O    | CYS D 136 | -13.989 | 18.005 | 32.986 | 1.00  | 51.23 |       | O0 |
| ANISOU11623 | O    | CYS D 136 | 5420    | 8120   | 5930   | -850  | 210   | -980  | O0 |
| ATOM 11624  | CB   | CYS D 136 | -15.338 | 16.145 | 34.865 | 1.00  | 52.32 |       | C0 |
| ANISOU11624 | CB   | CYS D 136 | 5580    | 8440   | 5850   | -580  | 170   | -810  | C0 |
| ATOM 11625  | SG   | CYS D 136 | -15.851 | 14.916 | 33.637 | 1.00  | 53.29 |       | S0 |
| ANISOU11625 | SG   | CYS D 136 | 5790    | 8380   | 6080   | -490  | 270   | -640  | S0 |
| ATOM 11626  | H    | CYS D 136 | -14.196 | 18.090 | 35.957 | 1.00  | 52.74 |       | H0 |
| ANISOU11626 | H    | CYS D 136 | 5530    | 8690   | 5820   | -780  | 40    | -1090 | H0 |
| ATOM 11627  | HA   | CYS D 136 | -13.339 | 15.655 | 35.024 | 1.00  | 52.91 |       | H0 |
| ANISOU11627 | HA   | CYS D 136 | 5430    | 8750   | 5920   | -560  | 110   | -760  | H0 |
| ATOM 11628  | HB2  | CYS D 136 | -15.561 | 15.806 | 35.755 | 1.00  | 53.11 |       | H0 |
| ANISOU11628 | HB2  | CYS D 136 | 5670    | 8660   | 5850   | -520  | 140   | -780  | H0 |
| ATOM 11629  | HB3  | CYS D 136 | -15.852 | 16.965 | 34.717 | 1.00  | 52.31 |       | H0 |
| ANISOU11629 | HB3  | CYS D 136 | 5650    | 8350   | 5870   | -650  | 180   | -900  | H0 |
| ATOM 11630  | N    | ARG D 137 | -12.545 | 16.247 | 32.752 | 1.00  | 51.52 |       | N0 |
| ANISOU11630 | N    | ARG D 137 | 5260    | 8340   | 5970   | -700  | 210   | -790  | N0 |
| ATOM 11631  | CA   | ARG D 137 | -12.026 | 16.590 | 31.400 | 1.00  | 51.56 |       | C0 |
| ANISOU11631 | CA   | ARG D 137 | 5260    | 8230   | 6100   | -770  | 280   | -800  | C0 |
| ATOM 11632  | C    | ARG D 137 | -12.699 | 15.693 | 30.353 | 1.00  | 48.71 |       | C0 |
| ANISOU11632 | C    | ARG D 137 | 5020    | 7690   | 5800   | -680  | 380   | -700  | C0 |
| ATOM 11633  | O    | ARG D 137 | -12.497 | 14.463 | 30.398 | 1.00  | 48.55 |       | O0 |
| ANISOU11633 | O    | ARG D 137 | 4970    | 7720   | 5760   | -540  | 400   | -590  | O0 |
| ATOM 11634  | CB   | ARG D 137 | -10.499 | 16.476 | 31.380 | 1.00  | 54.22 |       | C0 |
| ANISOU11634 | CB   | ARG D 137 | 5400    | 8760   | 6450   | -790  | 260   | -790  | C0 |
| ATOM 11635  | CG   | ARG D 137 | -9.813  | 17.369 | 32.405 | 1.00  | 56.99 |       | C0 |

|             |                |         |        |        |       |       |       |    |
|-------------|----------------|---------|--------|--------|-------|-------|-------|----|
| ANISOU11635 | CG ARG D 137   | 5620    | 9300   | 6730   | -920  | 150   | -910  | C0 |
| ATOM 11636  | CD ARG D 137   | -8.310  | 17.459 | 32.213 | 1.00  | 60.27 |       | C0 |
| ANISOU11636 | CD ARG D 137   | 5820    | 9910   | 7180   | -980  | 130   | -910  | C0 |
| ATOM 11637  | NE ARG D 137   | -7.621  | 17.759 | 33.462 | 1.00  | 63.98 |       | N0 |
| ANISOU11637 | NE ARG D 137   | 6130    | 10640  | 7540   | -1030 | 0     | -980  | N0 |
| ATOM 11638  | CZ ARG D 137   | -7.491  | 18.970 | 34.009 | 1.00  | 66.12 |       | C0 |
| ANISOU11638 | CZ ARG D 137   | 6390    | 10950  | 7790   | -1230 | -70   | -1140 | C0 |
| ATOM 11639  | NH1 ARG D 137  | -8.006  | 20.041 | 33.423 | 1.00  | 66.09 |       | N0 |
| ANISOU11639 | NH1 ARG D 137  | 6530    | 10710  | 7870   | -1390 | -20   | -1250 | N0 |
| ATOM 11640  | NH2 ARG D 137  | -6.839  | 19.105 | 35.153 | 1.00  | 67.86 |       | N0 |
| ANISOU11640 | NH2 ARG D 137  | 6460    | 11430  | 7890   | -1270 | -200  | -1210 | N0 |
| ATOM 11641  | H ARG D 137    | -12.182 | 15.485 | 33.094 | 1.00  | 52.13 |       | H0 |
| ANISOU11641 | H ARG D 137    | 5270    | 8520   | 6010   | -600  | 200   | -720  | H0 |
| ATOM 11642  | HA ARG D 137   | -12.267 | 17.524 | 31.210 | 1.00  | 51.31 |       | H0 |
| ANISOU11642 | HA ARG D 137   | 5280    | 8120   | 6100   | -880  | 290   | -890  | H0 |
| ATOM 11643  | HB2 ARG D 137  | -10.251 | 15.544 | 31.554 | 1.00  | 54.41 |       | H0 |
| ANISOU11643 | HB2 ARG D 137  | 5370    | 8860   | 6450   | -670  | 260   | -700  | H0 |
| ATOM 11644  | HB3 ARG D 137  | -10.177 | 16.714 | 30.486 | 1.00  | 54.09 |       | H0 |
| ANISOU11644 | HB3 ARG D 137  | 5380    | 8670   | 6500   | -850  | 320   | -790  | H0 |
| ATOM 11645  | HG2 ARG D 137  | -10.192 | 18.272 | 32.349 | 1.00  | 56.94 |       | H0 |
| ANISOU11645 | HG2 ARG D 137  | 5690    | 9190   | 6750   | -1030 | 150   | -1000 | H0 |
| ATOM 11646  | HG3 ARG D 137  | -9.996  | 17.025 | 33.305 | 1.00  | 57.46 |       | H0 |
| ANISOU11646 | HG3 ARG D 137  | 5660    | 9460   | 6700   | -850  | 100   | -890  | H0 |
| ATOM 11647  | HD2 ARG D 137  | -7.979  | 16.607 | 31.858 | 1.00  | 60.25 |       | H0 |
| ANISOU11647 | HD2 ARG D 137  | 5760    | 9940   | 7190   | -860  | 170   | -800  | H0 |
| ATOM 11648  | HD3 ARG D 137  | -8.109  | 18.158 | 31.556 | 1.00  | 60.39 |       | H0 |
| ANISOU11648 | HD3 ARG D 137  | 5840    | 9840   | 7270   | -1100 | 170   | -960  | H0 |
| ATOM 11649  | HE ARG D 137   | -7.263  | 17.089 | 33.890 | 1.00  | 64.45 |       | H0 |
| ANISOU11649 | HE ARG D 137   | 6090    | 10850  | 7550   | -920  | -30   | -910  | H0 |
| ATOM 11650  | HH11 ARG D 137 | -8.442  | 19.965 | 32.666 | 1.00  | 64.63 |       | H0 |
| ANISOU11650 | HH11 ARG D 137 | 6440    | 10360  | 7750   | -1360 | 60    | -1200 | H0 |
| ATOM 11651  | HH12 ARG D 137 | -7.912  | 20.831 | 33.797 | 1.00  | 66.70 |       | H0 |
| ANISOU11651 | HH12 ARG D 137 | 6620    | 10790  | 7940   | -1510 | -70   | -1360 | H0 |
| ATOM 11652  | HH21 ARG D 137 | -6.493  | 18.398 | 35.548 | 1.00  | 68.39 |       | H0 |
| ANISOU11652 | HH21 ARG D 137 | 6420    | 11660  | 7900   | -1150 | -230  | -1130 | H0 |
| ATOM 11653  | HH22 ARG D 137 | -6.751  | 19.902 | 35.518 | 1.00  | 68.75 |       | H0 |
| ANISOU11653 | HH22 ARG D 137 | 6570    | 11560  | 7990   | -1400 | -250  | -1330 | H0 |
| ATOM 11654  | N ILE D 138    | -13.481 | 16.300 | 29.457 | 1.00  | 46.51 |       | N0 |
| ANISOU11654 | N ILE D 138    | 4870    | 7220   | 5570   | -750  | 430   | -730  | N0 |
| ATOM 11655  | CA ILE D 138   | -14.206 | 15.618 | 28.344 | 1.00  | 45.46 |       | C0 |
| ANISOU11655 | CA ILE D 138   | 4860    | 6920   | 5490   | -690  | 510   | -660  | C0 |
| ATOM 11656  | C ILE D 138    | -13.499 | 15.985 | 27.035 | 1.00  | 45.25 |       | C0 |
| ANISOU11656 | C ILE D 138    | 4820    | 6840   | 5530   | -760  | 580   | -660  | C0 |
| ATOM 11657  | O ILE D 138    | -13.435 | 17.188 | 26.734 | 1.00  | 45.18 |       | O0 |
| ANISOU11657 | O ILE D 138    | 4830    | 6780   | 5560   | -890  | 580   | -730  | O0 |
| ATOM 11658  | CB ILE D 138   | -15.696 | 16.025 | 28.344 | 1.00  | 43.92 |       | C0 |
| ANISOU11658 | CB ILE D 138   | 4810    | 6590   | 5280   | -710  | 510   | -680  | C0 |
| ATOM 11659  | CG1 ILE D 138  | -16.422 | 15.527 | 29.597 | 1.00  | 43.93 |       | C0 |
| ANISOU11659 | CG1 ILE D 138  | 4820    | 6670   | 5200   | -640  | 460   | -650  | C0 |
| ATOM 11660  | CG2 ILE D 138  | -16.393 | 15.561 | 27.077 | 1.00  | 42.75 |       | C0 |
| ANISOU11660 | CG2 ILE D 138  | 4780    | 6290   | 5180   | -690  | 580   | -620  | C0 |
| ATOM 11661  | CD1 ILE D 138  | -17.670 | 16.307 | 29.929 | 1.00  | 43.46 |       | C0 |
| ANISOU11661 | CD1 ILE D 138  | 4850    | 6550   | 5120   | -670  | 450   | -710  | C0 |
| ATOM 11662  | H ILE D 138    | -13.624 | 17.199 | 29.471 | 1.00  | 46.91 |       | H0 |

|             |      |           |         |        |        |      |       |      |    |
|-------------|------|-----------|---------|--------|--------|------|-------|------|----|
| ANISOU11662 | H    | ILE D 138 | 4950    | 7230   | 5640   | -840 | 420   | -800 | H0 |
| ATOM 11663  | HA   | ILE D 138 | -14.148 | 14.655 | 28.475 | 1.00 | 45.29 |      | H0 |
| ANISOU11663 | HA   | ILE D 138 | 4830    | 6930   | 5450   | -600 | 520   | -590 | H0 |
| ATOM 11664  | HB   | ILE D 138 | -15.731 | 17.013 | 28.357 | 1.00 | 44.16 |      | H0 |
| ANISOU11664 | HB   | ILE D 138 | 4850    | 6600   | 5330   | -790 | 500   | -750 | H0 |
| ATOM 11665  | HG12 | ILE D 138 | -16.665 | 14.585 | 29.467 | 1.00 | 43.64 |      | H0 |
| ANISOU11665 | HG12 | ILE D 138 | 4810    | 6610   | 5160   | -570 | 480   | -570 | H0 |
| ATOM 11666  | HG13 | ILE D 138 | -15.808 | 15.576 | 30.360 | 1.00 | 44.73 |      | H0 |
| ANISOU11666 | HG13 | ILE D 138 | 4840    | 6900   | 5260   | -630 | 420   | -670 | H0 |
| ATOM 11667  | HG21 | ILE D 138 | -16.206 | 16.185 | 26.354 | 1.00 | 42.80 |      | H0 |
| ANISOU11667 | HG21 | ILE D 138 | 4800    | 6240   | 5220   | -760 | 610   | -650 | H0 |
| ATOM 11668  | HG22 | ILE D 138 | -17.353 | 15.522 | 27.226 | 1.00 | 42.27 |      | H0 |
| ANISOU11668 | HG22 | ILE D 138 | 4780    | 6180   | 5100   | -680 | 570   | -610 | H0 |
| ATOM 11669  | HG23 | ILE D 138 | -16.070 | 14.677 | 26.831 | 1.00 | 42.89 |      | H0 |
| ANISOU11669 | HG23 | ILE D 138 | 4780    | 6320   | 5200   | -630 | 600   | -570 | H0 |
| ATOM 11670  | HD11 | ILE D 138 | -17.455 | 17.254 | 29.992 | 1.00 | 43.83 |      | H0 |
| ANISOU11670 | HD11 | ILE D 138 | 4890    | 6590   | 5180   | -740 | 430   | -790 | H0 |
| ATOM 11671  | HD12 | ILE D 138 | -18.030 | 16.000 | 30.779 | 1.00 | 43.64 |      | H0 |
| ANISOU11671 | HD12 | ILE D 138 | 4860    | 6640   | 5080   | -620 | 420   | -690 | H0 |
| ATOM 11672  | HD13 | ILE D 138 | -18.334 | 16.173 | 29.230 | 1.00 | 42.75 |      | H0 |
| ANISOU11672 | HD13 | ILE D 138 | 4830    | 6350   | 5060   | -670 | 490   | -680 | H0 |
| ATOM 11673  | N    | LYS D 139 | -12.968 | 14.996 | 26.309 | 1.00 | 45.51 |      | N0 |
| ANISOU11673 | N    | LYS D 139 | 4830    | 6880   | 5590   | -670 | 640   | -590 | N0 |
| ATOM 11674  | CA   | LYS D 139 | -12.302 | 15.202 | 24.992 | 1.00 | 46.28 |      | C0 |
| ANISOU11674 | CA   | LYS D 139 | 4910    | 6940   | 5730   | -720 | 730   | -590 | C0 |
| ATOM 11675  | C    | LYS D 139 | -13.279 | 14.838 | 23.870 | 1.00 | 44.79 |      | C0 |
| ANISOU11675 | C    | LYS D 139 | 4890    | 6570   | 5550   | -690 | 790   | -560 | C0 |
| ATOM 11676  | O    | LYS D 139 | -13.814 | 13.713 | 23.895 | 1.00 | 44.41 |      | O0 |
| ANISOU11676 | O    | LYS D 139 | 4910    | 6470   | 5480   | -580 | 800   | -510 | O0 |
| ATOM 11677  | CB   | LYS D 139 | -11.011 | 14.383 | 24.901 | 1.00 | 48.62 |      | C0 |
| ANISOU11677 | CB   | LYS D 139 | 5060    | 7380   | 6040   | -620 | 770   | -540 | C0 |
| ATOM 11678  | CG   | LYS D 139 | -9.844  | 14.953 | 25.699 | 1.00 | 50.97 |      | C0 |
| ANISOU11678 | CG   | LYS D 139 | 5160    | 7880   | 6330   | -680 | 710   | -570 | C0 |
| ATOM 11679  | CD   | LYS D 139 | -8.495  | 14.351 | 25.358 | 1.00 | 53.19 |      | C0 |
| ANISOU11679 | CD   | LYS D 139 | 5260    | 8320   | 6630   | -590 | 760   | -520 | C0 |
| ATOM 11680  | CE   | LYS D 139 | -7.395  | 14.851 | 26.274 | 1.00 | 55.25 |      | C0 |
| ANISOU11680 | CE   | LYS D 139 | 5300    | 8820   | 6870   | -660 | 690   | -550 | C0 |
| ATOM 11681  | NZ   | LYS D 139 | -6.061  | 14.374 | 25.844 | 1.00 | 57.30 |      | N0 |
| ANISOU11681 | NZ   | LYS D 139 | 5360    | 9260   | 7150   | -580 | 750   | -490 | N0 |
| ATOM 11682  | H    | LYS D 139 | -12.984 | 14.127 | 26.579 | 1.00 | 45.64 |      | H0 |
| ANISOU11682 | H    | LYS D 139 | 4840    | 6920   | 5580   | -570 | 640   | -540 | H0 |
| ATOM 11683  | HA   | LYS D 139 | -12.072 | 16.155 | 24.910 | 1.00 | 46.63 |      | H0 |
| ANISOU11683 | HA   | LYS D 139 | 4930    | 6990   | 5800   | -830 | 720   | -630 | H0 |
| ATOM 11684  | HB2  | LYS D 139 | -11.194 | 13.475 | 25.220 | 1.00 | 48.47 |      | H0 |
| ANISOU11684 | HB2  | LYS D 139 | 5060    | 7360   | 6000   | -500 | 760   | -490 | H0 |
| ATOM 11685  | HB3  | LYS D 139 | -10.746 | 14.322 | 23.960 | 1.00 | 48.67 |      | H0 |
| ANISOU11685 | HB3  | LYS D 139 | 5080    | 7350   | 6060   | -620 | 840   | -530 | H0 |
| ATOM 11686  | HG2  | LYS D 139 | -9.805  | 15.921 | 25.546 | 1.00 | 51.03 |      | H0 |
| ANISOU11686 | HG2  | LYS D 139 | 5160    | 7870   | 6360   | -810 | 700   | -620 | H0 |
| ATOM 11687  | HG3  | LYS D 139 | -10.020 | 14.811 | 26.654 | 1.00 | 51.00 |      | H0 |
| ANISOU11687 | HG3  | LYS D 139 | 5140    | 7940   | 6300   | -650 | 640   | -570 | H0 |
| ATOM 11688  | HD2  | LYS D 139 | -8.551  | 13.374 | 25.428 | 1.00 | 53.09 |      | H0 |
| ANISOU11688 | HD2  | LYS D 139 | 5270    | 8300   | 6600   | -450 | 780   | -460 | H0 |
| ATOM 11689  | HD3  | LYS D 139 | -8.266  | 14.577 | 24.431 | 1.00 | 53.20 |      | H0 |

|             |                |         |        |        |      |       |      |    |
|-------------|----------------|---------|--------|--------|------|-------|------|----|
| ANISOU11689 | HD3 LYS D 139  | 5270    | 8280   | 6660   | -640 | 840   | -520 | H0 |
| ATOM 11690  | HE2 LYS D 139  | -7.396  | 15.826 | 26.280 | 1.00 | 55.36 |      | H0 |
| ANISOU11690 | HE2 LYS D 139  | 5300    | 8830   | 6900   | -810 | 660   | -610 | H0 |
| ATOM 11691  | HE3 LYS D 139  | -7.564  | 14.542 | 27.184 | 1.00 | 55.32 |      | H0 |
| ANISOU11691 | HE3 LYS D 139  | 5290    | 8890   | 6840   | -600 | 610   | -540 | H0 |
| ATOM 11692  | HZ1 LYS D 139  | -6.041  | 13.468 | 25.854 | 1.00 | 57.22 |      | H0 |
| ANISOU11692 | HZ1 LYS D 139  | 5360    | 9260   | 7130   | -420 | 770   | -440 | H0 |
| ATOM 11693  | HZ2 LYS D 139  | -5.425  | 14.692 | 26.407 | 1.00 | 58.26 |      | H0 |
| ANISOU11693 | HZ2 LYS D 139  | 5330    | 9540   | 7260   | -630 | 690   | -510 | H0 |
| ATOM 11694  | HZ3 LYS D 139  | -5.887  | 14.666 | 25.003 | 1.00 | 57.21 |      | H0 |
| ANISOU11694 | HZ3 LYS D 139  | 5360    | 9210   | 7170   | -640 | 820   | -500 | H0 |
| ATOM 11695  | N ILE D 140    | -13.512 | 15.762 | 22.933 | 1.00 | 44.13 |      | N0 |
| ANISOU11695 | N ILE D 140    | 4870    | 6400   | 5490   | -800 | 830   | -580 | N0 |
| ATOM 11696  | CA ILE D 140   | -14.364 | 15.541 | 21.726 | 1.00 | 42.68 |      | C0 |
| ANISOU11696 | CA ILE D 140   | 4840    | 6080   | 5290   | -790 | 880   | -560 | C0 |
| ATOM 11697  | C ILE D 140    | -13.544 | 15.834 | 20.464 | 1.00 | 42.49 |      | C0 |
| ANISOU11697 | C ILE D 140    | 4800    | 6070   | 5280   | -830 | 970   | -540 | C0 |
| ATOM 11698  | O ILE D 140    | -12.990 | 16.940 | 20.353 | 1.00 | 42.68 |      | O0 |
| ANISOU11698 | O ILE D 140    | 4760    | 6120   | 5340   | -950 | 990   | -560 | O0 |
| ATOM 11699  | CB ILE D 140   | -15.644 | 16.393 | 21.781 | 1.00 | 42.75 |      | C0 |
| ANISOU11699 | CB ILE D 140   | 4960    | 5980   | 5300   | -850 | 840   | -580 | C0 |
| ATOM 11700  | CG1 ILE D 140  | -16.479 | 16.051 | 23.019 | 1.00 | 43.12 |      | C0 |
| ANISOU11700 | CG1 ILE D 140  | 5020    | 6040   | 5320   | -800 | 760   | -580 | C0 |
| ATOM 11701  | CG2 ILE D 140  | -16.445 | 16.231 | 20.492 | 1.00 | 42.46 |      | C0 |
| ANISOU11701 | CG2 ILE D 140  | 5050    | 5850   | 5240   | -850 | 880   | -550 | C0 |
| ATOM 11702  | CD1 ILE D 140  | -17.586 | 17.029 | 23.311 | 1.00 | 43.02 |      | C0 |
| ANISOU11702 | CD1 ILE D 140  | 5070    | 5960   | 5310   | -850 | 720   | -610 | C0 |
| ATOM 11703  | H ILE D 140    | -13.157 | 16.601 | 22.973 | 1.00 | 44.49 |      | H0 |
| ANISOU11703 | H ILE D 140    | 4880    | 6470   | 5560   | -880 | 820   | -610 | H0 |
| ATOM 11704  | HA ILE D 140   | -14.628 | 14.606 | 21.708 | 1.00 | 42.56 |      | H0 |
| ANISOU11704 | HA ILE D 140   | 4860    | 6050   | 5260   | -710 | 890   | -540 | H0 |
| ATOM 11705  | HB ILE D 140   | -15.372 | 17.341 | 21.853 | 1.00 | 43.16 |      | H0 |
| ANISOU11705 | HB ILE D 140   | 4990    | 6030   | 5380   | -930 | 830   | -600 | H0 |
| ATOM 11706  | HG12 ILE D 140 | -16.872 | 15.161 | 22.896 | 1.00 | 42.66 |      | H0 |
| ANISOU11706 | HG12 ILE D 140 | 5000    | 5970   | 5250   | -740 | 770   | -550 | H0 |
| ATOM 11707  | HG13 ILE D 140 | -15.886 | 16.011 | 23.799 | 1.00 | 43.42 |      | H0 |
| ANISOU11707 | HG13 ILE D 140 | 4970    | 6170   | 5360   | -790 | 740   | -600 | H0 |
| ATOM 11708  | HG21 ILE D 140 | -15.978 | 16.668 | 19.758 | 1.00 | 42.85 |      | H0 |
| ANISOU11708 | HG21 ILE D 140 | 5100    | 5890   | 5290   | -890 | 930   | -540 | H0 |
| ATOM 11709  | HG22 ILE D 140 | -17.323 | 16.636 | 20.598 | 1.00 | 41.96 |      | H0 |
| ANISOU11709 | HG22 ILE D 140 | 5040    | 5730   | 5170   | -870 | 840   | -550 | H0 |
| ATOM 11710  | HG23 ILE D 140 | -16.549 | 15.285 | 20.290 | 1.00 | 42.28 |      | H0 |
| ANISOU11710 | HG23 ILE D 140 | 5050    | 5820   | 5190   | -790 | 890   | -530 | H0 |
| ATOM 11711  | HD11 ILE D 140 | -17.209 | 17.917 | 23.439 | 1.00 | 43.40 |      | H0 |
| ANISOU11711 | HD11 ILE D 140 | 5100    | 6010   | 5380   | -910 | 710   | -650 | H0 |
| ATOM 11712  | HD12 ILE D 140 | -18.055 | 16.757 | 24.118 | 1.00 | 42.72 |      | H0 |
| ANISOU11712 | HD12 ILE D 140 | 5030    | 5950   | 5250   | -810 | 680   | -620 | H0 |
| ATOM 11713  | HD13 ILE D 140 | -18.211 | 17.048 | 22.566 | 1.00 | 42.56 |      | H0 |
| ANISOU11713 | HD13 ILE D 140 | 5090    | 5830   | 5250   | -850 | 740   | -590 | H0 |
| ATOM 11714  | N GLY D 141    | -13.496 | 14.868 | 19.547 | 1.00 | 41.65 |      | N0 |
| ANISOU11714 | N GLY D 141    | 4740    | 5940   | 5140   | -750 | 1040  | -520 | N0 |
| ATOM 11715  | CA GLY D 141   | -12.922 | 15.022 | 18.198 | 1.00 | 42.14 |      | C0 |
| ANISOU11715 | CA GLY D 141   | 4810    | 6010   | 5180   | -780 | 1150  | -510 | C0 |
| ATOM 11716  | C GLY D 141    | -13.521 | 14.021 | 17.229 | 1.00 | 41.27 |      | C0 |

|             |     |           |         |        |        |      |       |      |    |
|-------------|-----|-----------|---------|--------|--------|------|-------|------|----|
| ANISOU11716 | C   | GLY D 141 | 4840    | 5830   | 5020   | -690 | 1190  | -510 | C0 |
| ATOM 11717  | O   | GLY D 141 | -14.341 | 13.199 | 17.669 | 1.00 | 40.54 |      | O0 |
| ANISOU11717 | O   | GLY D 141 | 4830    | 5660   | 4910   | -630 | 1140  | -520 | O0 |
| ATOM 11718  | H   | GLY D 141 | -13.820 | 14.032 | 19.713 | 1.00 | 41.55 |      | H0 |
| ANISOU11718 | H   | GLY D 141 | 4770    | 5900   | 5120   | -670 | 1030  | -520 | H0 |
| ATOM 11719  | HA2 | GLY D 141 | -13.098 | 15.941 | 17.874 | 1.00 | 42.04 |      | H0 |
| ANISOU11719 | HA2 | GLY D 141 | 4830    | 5970   | 5180   | -870 | 1150  | -500 | H0 |
| ATOM 11720  | HA3 | GLY D 141 | -11.942 | 14.891 | 18.245 | 1.00 | 42.90 |      | H0 |
| ANISOU11720 | HA3 | GLY D 141 | 4800    | 6200   | 5300   | -750 | 1190  | -500 | H0 |
| ATOM 11721  | N   | SER D 142 | -13.125 | 14.087 | 15.957 | 1.00 | 41.76 |      | N0 |
| ANISOU11721 | N   | SER D 142 | 4930    | 5900   | 5030   | -710 | 1290  | -500 | N0 |
| ATOM 11722  | CA  | SER D 142 | -13.626 | 13.214 | 14.863 | 1.00 | 42.41 |      | C0 |
| ANISOU11722 | CA  | SER D 142 | 5160    | 5920   | 5030   | -640 | 1340  | -520 | C0 |
| ATOM 11723  | C   | SER D 142 | -13.173 | 11.771 | 15.103 | 1.00 | 42.89 |      | C0 |
| ANISOU11723 | C   | SER D 142 | 5210    | 5980   | 5100   | -490 | 1370  | -560 | C0 |
| ATOM 11724  | O   | SER D 142 | -12.033 | 11.567 | 15.560 | 1.00 | 43.90 |      | O0 |
| ANISOU11724 | O   | SER D 142 | 5200    | 6210   | 5270   | -420 | 1410  | -540 | O0 |
| ATOM 11725  | CB  | SER D 142 | -13.176 | 13.708 | 13.510 | 1.00 | 43.59 |      | C0 |
| ANISOU11725 | CB  | SER D 142 | 5330    | 6120   | 5110   | -690 | 1440  | -510 | C0 |
| ATOM 11726  | OG  | SER D 142 | -13.389 | 12.711 | 12.522 | 1.00 | 44.65 |      | O0 |
| ANISOU11726 | OG  | SER D 142 | 5580    | 6230   | 5160   | -610 | 1490  | -550 | O0 |
| ATOM 11727  | H   | SER D 142 | -12.506 | 14.687 | 15.663 | 1.00 | 42.55 |      | H0 |
| ANISOU11727 | H   | SER D 142 | 4970    | 6060   | 5140   | -760 | 1330  | -480 | H0 |
| ATOM 11728  | HA  | SER D 142 | -14.621 | 13.234 | 14.888 | 1.00 | 41.59 |      | H0 |
| ANISOU11728 | HA  | SER D 142 | 5140    | 5740   | 4910   | -670 | 1280  | -530 | H0 |
| ATOM 11729  | HB2 | SER D 142 | -13.679 | 14.520 | 13.273 | 1.00 | 43.32 |      | H0 |
| ANISOU11729 | HB2 | SER D 142 | 5330    | 6060   | 5070   | -770 | 1410  | -480 | H0 |
| ATOM 11730  | HB3 | SER D 142 | -12.220 | 13.936 | 13.544 | 1.00 | 44.44 |      | H0 |
| ANISOU11730 | HB3 | SER D 142 | 5320    | 6320   | 5240   | -690 | 1490  | -490 | H0 |
| ATOM 11731  | N   | TRP D 143 | -14.030 | 10.802 | 14.790 | 1.00 | 43.33 |      | N0 |
| ANISOU11731 | N   | TRP D 143 | 5420    | 5930   | 5120   | -450 | 1360  | -600 | N0 |
| ATOM 11732  | CA  | TRP D 143 | -13.697 | 9.362  | 14.936 | 1.00 | 44.43 |      | C0 |
| ANISOU11732 | CA  | TRP D 143 | 5600    | 6010   | 5270   | -300 | 1400  | -630 | C0 |
| ATOM 11733  | C   | TRP D 143 | -12.825 | 8.894  | 13.762 | 1.00 | 44.99 |      | C0 |
| ANISOU11733 | C   | TRP D 143 | 5690    | 6120   | 5280   | -210 | 1530  | -670 | C0 |
| ATOM 11734  | O   | TRP D 143 | -11.924 | 8.078  | 14.011 | 1.00 | 46.93 |      | O0 |
| ANISOU11734 | O   | TRP D 143 | 5880    | 6390   | 5560   | -70  | 1600  | -680 | O0 |
| ATOM 11735  | CB  | TRP D 143 | -14.963 | 8.514  | 15.081 | 1.00 | 44.94 |      | C0 |
| ANISOU11735 | CB  | TRP D 143 | 5830    | 5930   | 5330   | -310 | 1330  | -660 | C0 |
| ATOM 11736  | CG  | TRP D 143 | -14.668 | 7.134  | 15.584 | 1.00 | 47.08 |      | C0 |
| ANISOU11736 | CG  | TRP D 143 | 6140    | 6110   | 5640   | -180 | 1360  | -670 | C0 |
| ATOM 11737  | CD1 | TRP D 143 | -14.853 | 5.953  | 14.924 | 1.00 | 48.35 |      | C0 |
| ANISOU11737 | CD1 | TRP D 143 | 6460    | 6140   | 5770   | -110 | 1410  | -740 | C0 |
| ATOM 11738  | CD2 | TRP D 143 | -14.088 | 6.798  | 16.856 | 1.00 | 47.48 |      | C0 |
| ANISOU11738 | CD2 | TRP D 143 | 6080    | 6190   | 5770   | -80  | 1330  | -600 | C0 |
| ATOM 11739  | NE1 | TRP D 143 | -14.442 | 4.906  | 15.703 | 1.00 | 49.29 |      | N0 |
| ANISOU11739 | NE1 | TRP D 143 | 6580    | 6180   | 5960   | 30   | 1430  | -710 | N0 |
| ATOM 11740  | CE2 | TRP D 143 | -13.969 | 5.392  | 16.895 | 1.00 | 48.81 |      | C0 |
| ANISOU11740 | CE2 | TRP D 143 | 6350    | 6230   | 5960   | 60   | 1380  | -620 | C0 |
| ATOM 11741  | CE3 | TRP D 143 | -13.672 | 7.545  | 17.964 | 1.00 | 47.09 |      | C0 |
| ANISOU11741 | CE3 | TRP D 143 | 5860    | 6270   | 5760   | -90  | 1280  | -540 | C0 |
| ATOM 11742  | CZ2 | TRP D 143 | -13.447 | 4.723  | 18.002 | 1.00 | 49.97 |      | C0 |
| ANISOU11742 | CZ2 | TRP D 143 | 6440    | 6380   | 6170   | 190  | 1370  | -550 | C0 |
| ATOM 11743  | CZ3 | TRP D 143 | -13.155 | 6.883  | 19.056 | 1.00 | 48.35 |      | C0 |



|             |                |         |        |        |      |       |      |    |
|-------------|----------------|---------|--------|--------|------|-------|------|----|
| ANISOU11743 | CZ3 TRP D 143  | 5950    | 6460   | 5970   | 30   | 1260  | -480 | C0 |
| ATOM 11744  | CH2 TRP D 143  | -13.048 | 5.490  | 19.073 | 1.00 | 49.56 |      | C0 |
| ANISOU11744 | CH2 TRP D 143  | 6200    | 6480   | 6140   | 180  | 1310  | -470 | C0 |
| ATOM 11745  | H TRP D 143    | -14.867 | 10.957 | 14.467 | 1.00 | 42.75 |      | H0 |
| ANISOU11745 | H TRP D 143    | 5430    | 5800   | 5010   | -510 | 1320  | -600 | H0 |
| ATOM 11746  | HA TRP D 143   | -13.176 | 9.263  | 15.766 | 1.00 | 44.48 |      | H0 |
| ANISOU11746 | HA TRP D 143   | 5510    | 6060   | 5330   | -250 | 1380  | -600 | H0 |
| ATOM 11747  | HB2 TRP D 143  | -15.572 | 8.964  | 15.701 | 1.00 | 44.07 |      | H0 |
| ANISOU11747 | HB2 TRP D 143  | 5690    | 5810   | 5240   | -380 | 1250  | -630 | H0 |
| ATOM 11748  | HB3 TRP D 143  | -15.404 | 8.456  | 14.209 | 1.00 | 45.18 |      | H0 |
| ANISOU11748 | HB3 TRP D 143  | 5950    | 5920   | 5290   | -350 | 1350  | -700 | H0 |
| ATOM 11749  | HD1 TRP D 143  | -15.217 | 5.864  | 14.056 | 1.00 | 48.67 |      | H0 |
| ANISOU11749 | HD1 TRP D 143  | 6600    | 6140   | 5750   | -150 | 1430  | -800 | H0 |
| ATOM 11750  | HE1 TRP D 143  | -14.481 | 4.062  | 15.476 | 1.00 | 50.16 |      | H0 |
| ANISOU11750 | HE1 TRP D 143  | 6800    | 6190   | 6080   | 90   | 1460  | -750 | H0 |
| ATOM 11751  | HE3 TRP D 143  | -13.740 | 8.486  | 17.960 | 1.00 | 46.56 |      | H0 |
| ANISOU11751 | HE3 TRP D 143  | 5740    | 6270   | 5690   | -180 | 1250  | -540 | H0 |
| ATOM 11752  | HZ2 TRP D 143  | -13.376 | 3.786  | 18.017 | 1.00 | 50.75 |      | H0 |
| ANISOU11752 | HZ2 TRP D 143  | 6620    | 6370   | 6290   | 290  | 1410  | -550 | H0 |
| ATOM 11753  | HZ3 TRP D 143  | -12.870 | 7.378  | 19.807 | 1.00 | 47.88 |      | H0 |
| ANISOU11753 | HZ3 TRP D 143  | 5770    | 6490   | 5930   | 20   | 1210  | -440 | H0 |
| ATOM 11754  | HH2 TRP D 143  | -12.692 | 5.066  | 19.834 | 1.00 | 49.90 |      | H0 |
| ANISOU11754 | HH2 TRP D 143  | 6190    | 6550   | 6220   | 270  | 1290  | -420 | H0 |
| ATOM 11755  | N THR D 144    | -13.064 | 9.377  | 12.537 | 1.00 | 43.92 |      | N0 |
| ANISOU11755 | N THR D 144    | 5630    | 6010   | 5050   | -290 | 1580  | -700 | N0 |
| ATOM 11756  | CA THR D 144   | -12.440 | 8.806  | 11.310 | 1.00 | 44.95 |      | C0 |
| ANISOU11756 | CA THR D 144   | 5820    | 6170   | 5090   | -200 | 1710  | -760 | C0 |
| ATOM 11757  | C THR D 144    | -11.732 | 9.857  | 10.435 | 1.00 | 45.10 |      | C0 |
| ANISOU11757 | C THR D 144    | 5750    | 6340   | 5040   | -270 | 1800  | -720 | C0 |
| ATOM 11758  | O THR D 144    | -11.277 | 9.462  | 9.338  | 1.00 | 46.61 |      | O0 |
| ANISOU11758 | O THR D 144    | 5990    | 6580   | 5130   | -200 | 1920  | -770 | O0 |
| ATOM 11759  | CB THR D 144   | -13.479 | 8.047  | 10.476 | 1.00 | 44.86 |      | C0 |
| ANISOU11759 | CB THR D 144   | 6030    | 6030   | 4980   | -220 | 1690  | -850 | C0 |
| ATOM 11760  | OG1 THR D 144  | -14.390 | 8.996  | 9.919  | 1.00 | 43.69 |      | O0 |
| ANISOU11760 | OG1 THR D 144  | 5930    | 5910   | 4760   | -370 | 1630  | -820 | O0 |
| ATOM 11761  | CG2 THR D 144  | -14.209 | 6.996  | 11.282 | 1.00 | 44.41 |      | C0 |
| ANISOU11761 | CG2 THR D 144  | 6070    | 5810   | 4990   | -180 | 1610  | -880 | C0 |
| ATOM 11762  | H THR D 144    | -13.632 | 10.067 | 12.362 | 1.00 | 43.41 |      | H0 |
| ANISOU11762 | H THR D 144    | 5590    | 5940   | 4960   | -390 | 1530  | -680 | H0 |
| ATOM 11763  | HA THR D 144   | -11.763 | 8.158  | 11.600 | 1.00 | 45.68 |      | H0 |
| ANISOU11763 | HA THR D 144   | 5870    | 6270   | 5220   | -80  | 1760  | -770 | H0 |
| ATOM 11764  | HB THR D 144   | -13.006 | 7.597  | 9.736  | 1.00 | 46.07 |      | H0 |
| ANISOU11764 | HB THR D 144   | 6230    | 6210   | 5070   | -150 | 1790  | -900 | H0 |
| ATOM 11765  | HG21 THR D 144 | -13.565 | 6.458  | 11.777 | 1.00 | 44.95 |      | H0 |
| ANISOU11765 | HG21 THR D 144 | 6090    | 5870   | 5120   | -70  | 1650  | -880 | H0 |
| ATOM 11766  | HG22 THR D 144 | -14.718 | 6.420  | 10.683 | 1.00 | 44.96 |      | H0 |
| ANISOU11766 | HG22 THR D 144 | 6270    | 5800   | 5000   | -190 | 1620  | -960 | H0 |
| ATOM 11767  | HG23 THR D 144 | -14.818 | 7.428  | 11.908 | 1.00 | 43.27 |      | H0 |
| ANISOU11767 | HG23 THR D 144 | 5900    | 5650   | 4890   | -260 | 1520  | -840 | H0 |
| ATOM 11768  | N HIS D 145    | -11.627 | 11.121 | 10.866 | 1.00 | 43.74 |      | N0 |
| ANISOU11768 | N HIS D 145    | 5460    | 6240   | 4920   | -390 | 1750  | -630 | N0 |
| ATOM 11769  | CA HIS D 145   | -11.019 | 12.222 | 10.065 | 1.00 | 44.19 |      | C0 |
| ANISOU11769 | CA HIS D 145   | 5450    | 6420   | 4930   | -480 | 1840  | -570 | C0 |
| ATOM 11770  | C HIS D 145    | -9.835  | 12.855 | 10.807 | 1.00 | 44.23 |      | C0 |

|             |     |           |         |        |        |      |       |      |    |
|-------------|-----|-----------|---------|--------|--------|------|-------|------|----|
| ANISOU11770 | C   | HIS D 145 | 5220    | 6550   | 5030   | -510 | 1870  | -510 | C0 |
| ATOM 11771  | O   | HIS D 145 | -10.040 | 13.456 | 11.873 | 1.00 | 43.04 |      | O0 |
| ANISOU11771 | O   | HIS D 145 | 5010    | 6370   | 4980   | -590 | 1760  | -480 | O0 |
| ATOM 11772  | CB  | HIS D 145 | -12.065 | 13.281 | 9.693  | 1.00 | 43.30 |      | C0 |
| ANISOU11772 | CB  | HIS D 145 | 5430    | 6250   | 4770   | -630 | 1760  | -520 | C0 |
| ATOM 11773  | CG  | HIS D 145 | -13.142 | 12.776 | 8.795  | 1.00 | 43.23 |      | C0 |
| ANISOU11773 | CG  | HIS D 145 | 5610    | 6170   | 4640   | -620 | 1730  | -570 | C0 |
| ATOM 11774  | ND1 | HIS D 145 | -12.915 | 12.472 | 7.473  | 1.00 | 44.29 |      | N0 |
| ANISOU11774 | ND1 | HIS D 145 | 5830    | 6370   | 4630   | -590 | 1840  | -600 | N0 |
| ATOM 11775  | CD2 | HIS D 145 | -14.451 | 12.532 | 9.020  | 1.00 | 42.33 |      | C0 |
| ANISOU11775 | CD2 | HIS D 145 | 5620    | 5940   | 4520   | -650 | 1610  | -600 | C0 |
| ATOM 11776  | CE1 | HIS D 145 | -14.037 | 12.059 | 6.922  | 1.00 | 44.39 |      | C0 |
| ANISOU11776 | CE1 | HIS D 145 | 6000    | 6310   | 4550   | -600 | 1770  | -660 | C0 |
| ATOM 11777  | NE2 | HIS D 145 | -14.995 | 12.090 | 7.849  | 1.00 | 42.71 |      | N0 |
| ANISOU11777 | NE2 | HIS D 145 | 5810    | 6000   | 4420   | -640 | 1630  | -650 | N0 |
| ATOM 11778  | H   | HIS D 145 | -11.913 | 11.401 | 11.684 | 1.00 | 42.91 |      | H0 |
| ANISOU11778 | H   | HIS D 145 | 5320    | 6100   | 4880   | -430 | 1670  | -610 | H0 |
| ATOM 11779  | HA  | HIS D 145 | -10.675 | 11.830 | 9.228  | 1.00 | 45.26 |      | H0 |
| ANISOU11779 | HA  | HIS D 145 | 5620    | 6600   | 4980   | -420 | 1930  | -600 | H0 |
| ATOM 11780  | HB2 | HIS D 145 | -12.473 | 13.628 | 10.516 | 1.00 | 42.30 |      | H0 |
| ANISOU11780 | HB2 | HIS D 145 | 5280    | 6070   | 4720   | -670 | 1670  | -500 | H0 |
| ATOM 11781  | HB3 | HIS D 145 | -11.610 | 14.031 | 9.249  | 1.00 | 43.95 |      | H0 |
| ANISOU11781 | HB3 | HIS D 145 | 5460    | 6400   | 4840   | -690 | 1820  | -460 | H0 |
| ATOM 11782  | HD2 | HIS D 145 | -14.908 | 12.649 | 9.831  | 1.00 | 41.21 |      | H0 |
| ANISOU11782 | HD2 | HIS D 145 | 5460    | 5750   | 4450   | -670 | 1530  | -590 | H0 |
| ATOM 11783  | HE1 | HIS D 145 | -14.144 | 11.790 | 6.027  | 1.00 | 45.23 |      | H0 |
| ANISOU11783 | HE1 | HIS D 145 | 6200    | 6450   | 4540   | -590 | 1810  | -690 | H0 |
| ATOM 11784  | N   | HIS D 146 | -8.640  | 12.754 | 10.227 | 1.00 | 45.84 |      | N0 |
| ANISOU11784 | N   | HIS D 146 | 5310    | 6900   | 5200   | -450 | 2010  | -500 | N0 |
| ATOM 11785  | CA  | HIS D 146 | -7.403  | 13.429 | 10.699 | 1.00 | 46.82 |      | C0 |
| ANISOU11785 | CA  | HIS D 146 | 5190    | 7190   | 5400   | -510 | 2050  | -440 | C0 |
| ATOM 11786  | C   | HIS D 146 | -7.449  | 14.932 | 10.346 | 1.00 | 46.82 |      | C0 |
| ANISOU11786 | C   | HIS D 146 | 5170    | 7210   | 5410   | -720 | 2050  | -350 | C0 |
| ATOM 11787  | O   | HIS D 146 | -8.387  | 15.382 | 9.587  | 1.00 | 46.31 |      | O0 |
| ANISOU11787 | O   | HIS D 146 | 5280    | 7040   | 5270   | -800 | 2040  | -330 | O0 |
| ATOM 11788  | CB  | HIS D 146 | -6.158  | 12.738 | 10.119 | 1.00 | 49.16 |      | C0 |
| ANISOU11788 | CB  | HIS D 146 | 5360    | 7660   | 5660   | -360 | 2220  | -450 | C0 |
| ATOM 11789  | CG  | HIS D 146 | -6.156  | 12.632 | 8.631  | 1.00 | 50.11 |      | C0 |
| ANISOU11789 | CG  | HIS D 146 | 5590    | 7820   | 5630   | -340 | 2350  | -460 | C0 |
| ATOM 11790  | ND1 | HIS D 146 | -6.057  | 13.735 | 7.808  | 1.00 | 50.65 |      | N0 |
| ANISOU11790 | ND1 | HIS D 146 | 5650    | 7950   | 5640   | -500 | 2420  | -380 | N0 |
| ATOM 11791  | CD2 | HIS D 146 | -6.243  | 11.557 | 7.817  | 1.00 | 51.15 |      | C0 |
| ANISOU11791 | CD2 | HIS D 146 | 5850    | 7930   | 5660   | -180 | 2440  | -540 | C0 |
| ATOM 11792  | CE1 | HIS D 146 | -6.077  | 13.344 | 6.550  | 1.00 | 52.06 |      | C0 |
| ANISOU11792 | CE1 | HIS D 146 | 5940    | 8170   | 5670   | -430 | 2540  | -410 | C0 |
| ATOM 11793  | NE2 | HIS D 146 | -6.194  | 12.011 | 6.528  | 1.00 | 52.33 |      | N0 |
| ANISOU11793 | NE2 | HIS D 146 | 6060    | 8150   | 5670   | -240 | 2550  | -520 | N0 |
| ATOM 11794  | H   | HIS D 146 | -8.498  | 12.246 | 9.486  | 1.00 | 46.70 |      | H0 |
| ANISOU11794 | H   | HIS D 146 | 5470    | 7040   | 5240   | -380 | 2090  | -530 | H0 |
| ATOM 11795  | HA  | HIS D 146 | -7.372  | 13.346 | 11.685 | 1.00 | 46.27 |      | H0 |
| ANISOU11795 | HA  | HIS D 146 | 5050    | 7110   | 5420   | -500 | 1970  | -440 | H0 |
| ATOM 11796  | HB2 | HIS D 146 | -5.359  | 13.236 | 10.399 | 1.00 | 49.84 |      | H0 |
| ANISOU11796 | HB2 | HIS D 146 | 5270    | 7870   | 5790   | -420 | 2240  | -400 | H0 |
| ATOM 11797  | HB3 | HIS D 146 | -6.092  | 11.834 | 10.501 | 1.00 | 49.09 |      | H0 |

|             |               |        |        |        |       |       |      |    |
|-------------|---------------|--------|--------|--------|-------|-------|------|----|
| ANISOU11797 | HB3 HIS D 146 | 5360   | 7630   | 5670   | -220  | 2210  | -490 | H0 |
| ATOM 11798  | HD2 HIS D 146 | -6.322 | 10.660 | 8.085  | 1.00  | 51.13 |      | H0 |
| ANISOU11798 | HD2 HIS D 146 | 5890   | 7860   | 5670   | -40   | 2430  | -600 | H0 |
| ATOM 11799  | HE1 HIS D 146 | -6.026 | 13.907 | 5.797  | 1.00  | 52.74 |      | H0 |
| ANISOU11799 | HE1 HIS D 146 | 6050   | 8320   | 5680   | -510  | 2600  | -350 | H0 |
| ATOM 11800  | N SER D 147   | -6.448 | 15.670 | 10.865 | 1.00  | 48.18 |      | N0 |
| ANISOU11800 | N SER D 147   | 5130   | 7510   | 5670   | -830  | 2070  | -300 | N0 |
| ATOM 11801  | CA SER D 147  | -6.389 | 17.156 | 10.938 | 1.00  | 49.20 |      | C0 |
| ANISOU11801 | CA SER D 147  | 5220   | 7620   | 5850   | -1050 | 2050  | -230 | C0 |
| ATOM 11802  | C SER D 147   | -6.478 | 17.818 | 9.554  | 1.00  | 50.99 |      | C0 |
| ANISOU11802 | C SER D 147   | 5550   | 7850   | 5980   | -1140 | 2160  | -150 | C0 |
| ATOM 11803  | O SER D 147   | -6.738 | 19.035 | 9.526  | 1.00  | 51.39 |      | O0 |
| ANISOU11803 | O SER D 147   | 5640   | 7820   | 6070   | -1320 | 2140  | -80  | O0 |
| ATOM 11804  | CB SER D 147  | -5.137 | 17.597 | 11.643 | 1.00  | 50.21 |      | C0 |
| ANISOU11804 | CB SER D 147  | 5090   | 7910   | 6070   | -1140 | 2070  | -200 | C0 |
| ATOM 11805  | OG SER D 147  | -3.986 | 17.092 | 10.982 | 1.00  | 51.87 |      | O0 |
| ANISOU11805 | OG SER D 147  | 5140   | 8330   | 6240   | -1060 | 2220  | -180 | O0 |
| ATOM 11806  | H SER D 147   | -5.695 | 15.291 | 11.230 | 1.00  | 49.00 |      | H0 |
| ANISOU11806 | H SER D 147   | 5100   | 7720   | 5800   | -760  | 2100  | -310 | H0 |
| ATOM 11807  | HA SER D 147  | -7.168 | 17.462 | 11.474 | 1.00  | 47.88 |      | H0 |
| ANISOU11807 | HA SER D 147  | 5140   | 7330   | 5720   | -1100 | 1940  | -240 | H0 |
| ATOM 11808  | HB2 SER D 147 | -5.101 | 18.581 | 11.661 | 1.00  | 50.57 |      | H0 |
| ANISOU11808 | HB2 SER D 147 | 5120   | 7930   | 6160   | -1310 | 2060  | -160 | H0 |
| ATOM 11809  | HB3 SER D 147 | -5.153 | 17.273 | 12.571 | 1.00  | 49.62 |      | H0 |
| ANISOU11809 | HB3 SER D 147 | 4960   | 7840   | 6050   | -1090 | 1980  | -250 | H0 |
| ATOM 11810  | N ARG D 148   | -6.244 | 17.085 | 8.460  | 1.00  | 52.57 |      | N0 |
| ANISOU11810 | N ARG D 148   | 5790   | 8140   | 6050   | -1020 | 2290  | -160 | N0 |
| ATOM 11811  | CA ARG D 148  | -6.303 | 17.638 | 7.077  | 1.00  | 55.17 |      | C0 |
| ANISOU11811 | CA ARG D 148  | 6210   | 8500   | 6250   | -1090 | 2410  | -70  | C0 |
| ATOM 11812  | C ARG D 148   | -7.715 | 17.490 | 6.489  | 1.00  | 53.38 |      | C0 |
| ANISOU11812 | C ARG D 148   | 6240   | 8120   | 5920   | -1060 | 2330  | -90  | C0 |
| ATOM 11813  | O ARG D 148   | -7.972 | 18.105 | 5.438  | 1.00  | 53.81 |      | O0 |
| ANISOU11813 | O ARG D 148   | 6400   | 8180   | 5870   | -1130 | 2400  | -10  | O0 |
| ATOM 11814  | CB ARG D 148  | -5.255 | 16.979 | 6.171  | 1.00  | 58.52 |      | C0 |
| ANISOU11814 | CB ARG D 148  | 6530   | 9130   | 6570   | -990  | 2600  | -80  | C0 |
| ATOM 11815  | CG ARG D 148  | -3.809 | 17.233 | 6.576  | 1.00  | 61.66 |      | C0 |
| ANISOU11815 | CG ARG D 148  | 6640   | 9730   | 7060   | -1040 | 2690  | -30  | C0 |
| ATOM 11816  | CD ARG D 148  | -3.497 | 18.689 | 6.902  | 1.00  | 63.87 |      | C0 |
| ANISOU11816 | CD ARG D 148  | 6820   | 10000  | 7440   | -1300 | 2660  | 80   | C0 |
| ATOM 11817  | NE ARG D 148  | -3.887 | 19.613 | 5.840  | 1.00  | 65.91 |      | N0 |
| ANISOU11817 | NE ARG D 148  | 7220   | 10210  | 7610   | -1440 | 2730  | 190  | N0 |
| ATOM 11818  | CZ ARG D 148  | -4.074 | 20.929 | 5.979  | 1.00  | 66.66 |      | C0 |
| ANISOU11818 | CZ ARG D 148  | 7350   | 10190  | 7790   | -1660 | 2690  | 290  | C0 |
| ATOM 11819  | NH1 ARG D 148 | -4.425 | 21.653 | 4.929  | 1.00  | 68.16 |      | N0 |
| ANISOU11819 | NH1 ARG D 148 | 7680   | 10340  | 7880   | -1750 | 2770  | 420  | N0 |
| ATOM 11820  | NH2 ARG D 148 | -3.921 | 21.521 | 7.153  | 1.00  | 66.34 |      | N0 |
| ANISOU11820 | NH2 ARG D 148 | 7210   | 10080  | 7920   | -1790 | 2580  | 270  | N0 |
| ATOM 11821  | H ARG D 148   | -6.014 | 16.207 | 8.493  | 1.00  | 52.89 |      | H0 |
| ANISOU11821 | H ARG D 148   | 5800   | 8220   | 6070   | -890  | 2320  | -210 | H0 |
| ATOM 11822  | HA ARG D 148  | -6.101 | 18.599 | 7.130  | 1.00  | 55.50 |      | H0 |
| ANISOU11822 | HA ARG D 148  | 6210   | 8540   | 6340   | -1240 | 2410  | 0    | H0 |
| ATOM 11823  | HB2 ARG D 148 | -5.413 | 16.014 | 6.168  | 1.00  | 58.20 |      | H0 |
| ANISOU11823 | HB2 ARG D 148 | 6540   | 9080   | 6490   | -830  | 2590  | -160 | H0 |
| ATOM 11824  | HB3 ARG D 148 | -5.387 | 17.306 | 5.256  | 1.00  | 59.29 |      | H0 |

|                            |         |        |        |       |       |      |    |
|----------------------------|---------|--------|--------|-------|-------|------|----|
| ANISOU11824 HB3 ARG D 148  | 6710    | 9260   | 6570   | -1030 | 2670  | -20  | H0 |
| ATOM 11825 HG2 ARG D 148   | -3.598  | 16.685 | 7.362  | 1.00  | 61.23 |      | H0 |
| ANISOU11825 HG2 ARG D 148  | 6500    | 9690   | 7070   | -950  | 2630  | -90  | H0 |
| ATOM 11826 HG3 ARG D 148   | -3.219  | 16.944 | 5.847  | 1.00  | 63.19 |      | H0 |
| ANISOU11826 HG3 ARG D 148  | 6780    | 10070  | 7170   | -980  | 2820  | -20  | H0 |
| ATOM 11827 HD2 ARG D 148   | -3.959  | 18.935 | 7.731  | 1.00  | 62.46 |      | H0 |
| ANISOU11827 HD2 ARG D 148  | 6670    | 9700   | 7350   | -1350 | 2540  | 50   | H0 |
| ATOM 11828 HD3 ARG D 148   | -2.533  | 18.778 | 7.063  | 1.00  | 65.13 |      | H0 |
| ANISOU11828 HD3 ARG D 148  | 6780    | 10320  | 7650   | -1340 | 2730  | 100  | H0 |
| ATOM 11829 HE ARG D 148    | -4.001  | 19.279 | 5.042  | 1.00  | 66.25 |      | H0 |
| ANISOU11829 HE ARG D 148   | 7340    | 10290  | 7540   | -1360 | 2810  | 200  | H0 |
| ATOM 11830 HH11 ARG D 148  | -4.531  | 21.269 | 4.146  | 1.00  | 68.34 |      | H0 |
| ANISOU11830 HH11 ARG D 148 | 7760    | 10420  | 7780   | -1660 | 2840  | 430  | H0 |
| ATOM 11831 HH12 ARG D 148  | -4.552  | 22.519 | 5.016  | 1.00  | 68.16 |      | H0 |
| ANISOU11831 HH12 ARG D 148 | 7710    | 10250  | 7940   | -1890 | 2750  | 490  | H0 |
| ATOM 11832 HH21 ARG D 148  | -3.687  | 21.053 | 7.860  | 1.00  | 65.75 |      | H0 |
| ANISOU11832 HH21 ARG D 148 | 7040    | 10040  | 7890   | -1730 | 2530  | 200  | H0 |
| ATOM 11833 HH22 ARG D 148  | -4.051  | 22.390 | 7.225  | 1.00  | 66.53 |      | H0 |
| ANISOU11833 HH22 ARG D 148 | 7270    | 10010  | 7990   | -1930 | 2560  | 330  | H0 |
| ATOM 11834 N GLU D 149     | -8.600  | 16.732 | 7.142  | 1.00  | 51.59 |      | N0 |
| ANISOU11834 N GLU D 149    | 6110    | 7770   | 5720   | -960  | 2210  | -190 | N0 |
| ATOM 11835 CA GLU D 149    | -10.007 | 16.529 | 6.701  | 1.00  | 50.60 |      | C0 |
| ANISOU11835 CA GLU D 149   | 6210    | 7510   | 5510   | -940  | 2110  | -220 | C0 |
| ATOM 11836 C GLU D 149     | -10.966 | 17.269 | 7.644  | 1.00  | 48.61 |      | C0 |
| ANISOU11836 C GLU D 149    | 6000    | 7100   | 5360   | -1020 | 1960  | -190 | C0 |
| ATOM 11837 O GLU D 149     | -11.899 | 17.919 | 7.140  | 1.00  | 47.97 |      | O0 |
| ANISOU11837 O GLU D 149    | 6050    | 6950   | 5230   | -1080 | 1910  | -130 | O0 |
| ATOM 11838 CB GLU D 149    | -10.303 | 15.033 | 6.624  | 1.00  | 50.48 |      | C0 |
| ANISOU11838 CB GLU D 149   | 6270    | 7480   | 5430   | -770  | 2110  | -350 | C0 |
| ATOM 11839 CG GLU D 149    | -9.463  | 14.328 | 5.582  | 1.00  | 52.62 |      | C0 |
| ANISOU11839 CG GLU D 149   | 6530    | 7890   | 5570   | -660  | 2270  | -390 | C0 |
| ATOM 11840 CD GLU D 149    | -9.694  | 12.832 | 5.494  | 1.00  | 53.23 |      | C0 |
| ANISOU11840 CD GLU D 149   | 6710    | 7920   | 5600   | -490  | 2280  | -530 | C0 |
| ATOM 11841 OE1 GLU D 149   | -10.516 | 12.306 | 6.285  | 1.00  | 51.89 |      | O0 |
| ANISOU11841 OE1 GLU D 149  | 6620    | 7600   | 5500   | -470  | 2150  | -590 | O0 |
| ATOM 11842 OE2 GLU D 149   | -9.049  | 12.192 | 4.636  | 1.00  | 55.09 |      | O0 |
| ANISOU11842 OE2 GLU D 149  | 6960    | 8250   | 5720   | -380  | 2420  | -590 | O0 |
| ATOM 11843 H GLU D 149     | -8.389  | 16.275 | 7.899  | 1.00  | 51.15 |      | H0 |
| ANISOU11843 H GLU D 149    | 5990    | 7710   | 5740   | -910  | 2170  | -240 | H0 |
| ATOM 11844 HA GLU D 149    | -10.106 | 16.911 | 5.799  | 1.00  | 51.36 |      | H0 |
| ANISOU11844 HA GLU D 149   | 6370    | 7640   | 5500   | -970  | 2170  | -160 | H0 |
| ATOM 11845 HB2 GLU D 149   | -10.130 | 14.633 | 7.502  | 1.00  | 49.88 |      | H0 |
| ANISOU11845 HB2 GLU D 149  | 6130    | 7370   | 5450   | -720  | 2060  | -390 | H0 |
| ATOM 11846 HB3 GLU D 149   | -11.251 | 14.908 | 6.414  | 1.00  | 49.82 |      | H0 |
| ANISOU11846 HB3 GLU D 149  | 6320    | 7310   | 5290   | -770  | 2030  | -370 | H0 |
| ATOM 11847 HG2 GLU D 149   | -9.652  | 14.721 | 4.703  | 1.00  | 53.37 |      | H0 |
| ANISOU11847 HG2 GLU D 149  | 6700    | 8020   | 5560   | -710  | 2320  | -350 | H0 |
| ATOM 11848 HG3 GLU D 149   | -8.516  | 14.483 | 5.777  | 1.00  | 53.48 |      | H0 |
| ANISOU11848 HG3 GLU D 149  | 6500    | 8100   | 5730   | -660  | 2350  | -360 | H0 |
| ATOM 11849 N ILE D 150     | -10.756 | 17.166 | 8.958  | 1.00  | 47.64 |      | N0 |
| ANISOU11849 N ILE D 150    | 5770    | 6950   | 5380   | -1020 | 1880  | -240 | N0 |
| ATOM 11850 CA ILE D 150    | -11.525 | 17.936 | 9.980  | 1.00  | 46.68 |      | C0 |
| ANISOU11850 CA ILE D 150   | 5680    | 6700   | 5370   | -1100 | 1740  | -220 | C0 |
| ATOM 11851 C ILE D 150     | -10.534 | 18.579 | 10.950 | 1.00  | 47.42 |      | C0 |

|             |      |           |         |        |        |       |       |      |    |
|-------------|------|-----------|---------|--------|--------|-------|-------|------|----|
| ANISOU11851 | C    | ILE D 150 | 5590    | 6840   | 5590   | -1190 | 1740  | -210 | C0 |
| ATOM 11852  | O    | ILE D 150 | -9.656  | 17.859 | 11.468 | 1.00  | 47.50 |      | O0 |
| ANISOU11852 | O    | ILE D 150 | 5460    | 6950   | 5640   | -1120 | 1770  | -260 | O0 |
| ATOM 11853  | CB   | ILE D 150 | -12.551 | 17.040 | 10.706 | 1.00  | 45.46 |      | C0 |
| ANISOU11853 | CB   | ILE D 150 | 5600    | 6450   | 5220   | -1000 | 1620  | -310 | C0 |
| ATOM 11854  | CG1  | ILE D 150 | -13.584 | 16.483 | 9.724  | 1.00  | 45.06 |      | C0 |
| ANISOU11854 | CG1  | ILE D 150 | 5720    | 6360   | 5040   | -950  | 1610  | -320 | C0 |
| ATOM 11855  | CG2  | ILE D 150 | -13.210 | 17.783 | 11.865 | 1.00  | 44.60 |      | C0 |
| ANISOU11855 | CG2  | ILE D 150 | 5490    | 6240   | 5220   | -1060 | 1500  | -300 | C0 |
| ATOM 11856  | CD1  | ILE D 150 | -14.666 | 15.651 | 10.361 | 1.00  | 43.89 |      | C0 |
| ANISOU11856 | CD1  | ILE D 150 | 5650    | 6120   | 4910   | -890  | 1490  | -400 | C0 |
| ATOM 11857  | H    | ILE D 150 | -10.133 | 16.606 | 9.317  | 1.00  | 48.00 |      | H0 |
| ANISOU11857 | H    | ILE D 150 | 5730    | 7050   | 5460   | -960  | 1910  | -280 | H0 |
| ATOM 11858  | HA   | ILE D 150 | -12.012 | 18.645 | 9.526  | 1.00  | 46.83 |      | H0 |
| ANISOU11858 | HA   | ILE D 150 | 5780    | 6660   | 5360   | -1160 | 1730  | -170 | H0 |
| ATOM 11859  | HB   | ILE D 150 | -12.057 | 16.271 | 11.085 | 1.00  | 45.47 |      | H0 |
| ANISOU11859 | HB   | ILE D 150 | 5530    | 6500   | 5250   | -930  | 1640  | -350 | H0 |
| ATOM 11860  | HG12 | ILE D 150 | -14.003 | 17.233 | 9.250  | 1.00  | 45.30 |      | H0 |
| ANISOU11860 | HG12 | ILE D 150 | 5810    | 6370   | 5040   | -1010 | 1600  | -260 | H0 |
| ATOM 11861  | HG13 | ILE D 150 | -13.118 | 15.931 | 9.060  | 1.00  | 45.99 |      | H0 |
| ANISOU11861 | HG13 | ILE D 150 | 5840    | 6540   | 5090   | -900  | 1690  | -350 | H0 |
| ATOM 11862  | HG21 | ILE D 150 | -12.532 | 18.063 | 12.504 | 1.00  | 44.76 |      | H0 |
| ANISOU11862 | HG21 | ILE D 150 | 5400    | 6300   | 5310   | -1100 | 1500  | -310 | H0 |
| ATOM 11863  | HG22 | ILE D 150 | -13.845 | 17.197 | 12.311 | 1.00  | 43.62 |      | H0 |
| ANISOU11863 | HG22 | ILE D 150 | 5400    | 6070   | 5100   | -1010 | 1430  | -350 | H0 |
| ATOM 11864  | HG23 | ILE D 150 | -13.676 | 18.567 | 11.527 | 1.00  | 44.56 |      | H0 |
| ANISOU11864 | HG23 | ILE D 150 | 5550    | 6180   | 5200   | -1130 | 1480  | -250 | H0 |
| ATOM 11865  | HD11 | ILE D 150 | -14.275 | 15.065 | 11.032 | 1.00  | 43.63 |      | H0 |
| ANISOU11865 | HD11 | ILE D 150 | 5550    | 6100   | 4930   | -830  | 1490  | -440 | H0 |
| ATOM 11866  | HD12 | ILE D 150 | -15.106 | 15.113 | 9.680  | 1.00  | 44.05 |      | H0 |
| ANISOU11866 | HD12 | ILE D 150 | 5760    | 6140   | 4840   | -850  | 1500  | -420 | H0 |
| ATOM 11867  | HD13 | ILE D 150 | -15.321 | 16.234 | 10.783 | 1.00  | 43.14 |      | H0 |
| ANISOU11867 | HD13 | ILE D 150 | 5570    | 5970   | 4850   | -930  | 1420  | -370 | H0 |
| ATOM 11868  | N    | SER D 151 | -10.664 | 19.892 | 11.150 | 1.00  | 48.61 |      | N0 |
| ANISOU11868 | N    | SER D 151 | 5750    | 6910   | 5810   | -1340 | 1710  | -150 | N0 |
| ATOM 11869  | CA   | SER D 151 | -10.083 | 20.636 | 12.294 | 1.00  | 49.71 |      | C0 |
| ANISOU11869 | CA   | SER D 151 | 5770    | 7040   | 6080   | -1450 | 1660  | -170 | C0 |
| ATOM 11870  | C    | SER D 151 | -11.217 | 20.970 | 13.262 | 1.00  | 48.88 |      | C0 |
| ANISOU11870 | C    | SER D 151 | 5760    | 6780   | 6030   | -1450 | 1520  | -220 | C0 |
| ATOM 11871  | O    | SER D 151 | -12.354 | 21.207 | 12.794 | 1.00  | 48.37 |      | O0 |
| ANISOU11871 | O    | SER D 151 | 5860    | 6600   | 5920   | -1420 | 1490  | -180 | O0 |
| ATOM 11872  | CB   | SER D 151 | -9.337  | 21.867 | 11.851 | 1.00  | 51.86 |      | C0 |
| ANISOU11872 | CB   | SER D 151 | 5990    | 7320   | 6400   | -1640 | 1740  | -80  | C0 |
| ATOM 11873  | OG   | SER D 151 | -10.177 | 22.731 | 11.108 | 1.00  | 52.91 |      | O0 |
| ANISOU11873 | OG   | SER D 151 | 6300    | 7300   | 6500   | -1690 | 1750  | 0    | O0 |
| ATOM 11874  | H    | SER D 151 | -11.125 | 20.438 | 10.584 | 1.00  | 48.74 |      | H0 |
| ANISOU11874 | H    | SER D 151 | 5870    | 6860   | 5790   | -1380 | 1720  | -100 | H0 |
| ATOM 11875  | HA   | SER D 151 | -9.447  | 20.033 | 12.759 | 1.00  | 49.88 |      | H0 |
| ANISOU11875 | HA   | SER D 151 | 5670    | 7160   | 6120   | -1400 | 1670  | -210 | H0 |
| ATOM 11876  | HB2  | SER D 151 | -8.995  | 22.344 | 12.639 | 1.00  | 52.24 |      | H0 |
| ANISOU11876 | HB2  | SER D 151 | 5960    | 7360   | 6530   | -1720 | 1700  | -110 | H0 |
| ATOM 11877  | HB3  | SER D 151 | -8.571  | 21.601 | 11.297 | 1.00  | 53.04 |      | H0 |
| ANISOU11877 | HB3  | SER D 151 | 6050    | 7590   | 6510   | -1640 | 1840  | -50  | H0 |
| ATOM 11878  | N    | VAL D 152 | -10.933 | 20.922 | 14.562 | 1.00  | 49.31 |      | N0 |

|                            |         |        |        |       |       |      |    |
|----------------------------|---------|--------|--------|-------|-------|------|----|
| ANISOU11878 N VAL D 152    | 5710    | 6860   | 6160   | -1460 | 1440  | -290 | N0 |
| ATOM 11879 CA VAL D 152    | -11.908 | 21.267 | 15.637 | 1.00  | 48.47 |      | C0 |
| ANISOU11879 CA VAL D 152   | 5680    | 6630   | 6100   | -1450 | 1320  | -350 | C0 |
| ATOM 11880 C VAL D 152     | -11.265 | 22.344 | 16.511 | 1.00  | 49.74 |      | C0 |
| ANISOU11880 C VAL D 152    | 5750    | 6780   | 6360   | -1610 | 1280  | -380 | C0 |
| ATOM 11881 O VAL D 152     | -10.117 | 22.142 | 16.940 | 1.00  | 50.29 |      | O0 |
| ANISOU11881 O VAL D 152    | 5640    | 7000   | 6460   | -1650 | 1300  | -410 | O0 |
| ATOM 11882 CB VAL D 152    | -12.359 | 20.038 | 16.454 | 1.00  | 47.40 |      | C0 |
| ANISOU11882 CB VAL D 152   | 5520    | 6540   | 5940   | -1300 | 1240  | -410 | C0 |
| ATOM 11883 CG1 VAL D 152   | -13.225 | 19.103 | 15.624 | 1.00  | 46.63 |      | C0 |
| ANISOU11883 CG1 VAL D 152  | 5550    | 6410   | 5760   | -1180 | 1260  | -390 | C0 |
| ATOM 11884 CG2 VAL D 152   | -11.193 | 19.279 | 17.067 | 1.00  | 48.43 |      | C0 |
| ANISOU11884 CG2 VAL D 152  | 5470    | 6840   | 6090   | -1260 | 1250  | -450 | C0 |
| ATOM 11885 H VAL D 152     | -10.111 | 20.686 | 14.877 | 1.00  | 49.79 |      | H0 |
| ANISOU11885 H VAL D 152    | 5640    | 7030   | 6250   | -1470 | 1460  | -310 | H0 |
| ATOM 11886 HA VAL D 152    | -12.694 | 21.650 | 15.216 | 1.00  | 48.18 |      | H0 |
| ANISOU11886 HA VAL D 152   | 5760    | 6500   | 6050   | -1450 | 1310  | -310 | H0 |
| ATOM 11887 HB VAL D 152    | -12.916 | 20.374 | 17.198 | 1.00  | 46.91 |      | H0 |
| ANISOU11887 HB VAL D 152   | 5490    | 6420   | 5910   | -1310 | 1170  | -450 | H0 |
| ATOM 11888 HG11 VAL D 152  | -14.009 | 19.584 | 15.306 | 1.00  | 46.29 |      | H0 |
| ANISOU11888 HG11 VAL D 152 | 5610    | 6280   | 5700   | -1200 | 1240  | -370 | H0 |
| ATOM 11889 HG12 VAL D 152  | -13.507 | 18.350 | 16.172 | 1.00  | 45.92 |      | H0 |
| ANISOU11889 HG12 VAL D 152 | 5450    | 6340   | 5660   | -1100 | 1210  | -430 | H0 |
| ATOM 11890 HG13 VAL D 152  | -12.715 | 18.777 | 14.863 | 1.00  | 47.22 |      | H0 |
| ANISOU11890 HG13 VAL D 152 | 5600    | 6540   | 5790   | -1170 | 1330  | -370 | H0 |
| ATOM 11891 HG21 VAL D 152  | -10.549 | 19.054 | 16.374 | 1.00  | 49.04 |      | H0 |
| ANISOU11891 HG21 VAL D 152 | 5500    | 6990   | 6150   | -1250 | 1330  | -410 | H0 |
| ATOM 11892 HG22 VAL D 152  | -11.521 | 18.461 | 17.479 | 1.00  | 47.56 |      | H0 |
| ANISOU11892 HG22 VAL D 152 | 5370    | 6740   | 5960   | -1160 | 1220  | -470 | H0 |
| ATOM 11893 HG23 VAL D 152  | -10.763 | 19.830 | 17.743 | 1.00  | 48.79 |      | H0 |
| ANISOU11893 HG23 VAL D 152 | 5440    | 6920   | 6190   | -1340 | 1220  | -470 | H0 |
| ATOM 11894 N ASP D 153     | -11.973 | 23.457 | 16.709 | 1.00  | 50.69 |      | N0 |
| ANISOU11894 N ASP D 153    | 6000    | 6730   | 6530   | -1680 | 1240  | -380 | N0 |
| ATOM 11895 CA ASP D 153    | -11.504 | 24.630 | 17.490 | 1.00  | 52.58 |      | C0 |
| ANISOU11895 CA ASP D 153   | 6200    | 6910   | 6870   | -1850 | 1210  | -430 | C0 |
| ATOM 11896 C ASP D 153     | -12.594 | 25.019 | 18.479 | 1.00  | 51.84 |      | C0 |
| ANISOU11896 C ASP D 153    | 6220    | 6680   | 6800   | -1800 | 1100  | -510 | C0 |
| ATOM 11897 O ASP D 153     | -13.779 | 24.991 | 18.146 | 1.00  | 50.39 |      | O0 |
| ANISOU11897 O ASP D 153    | 6180    | 6390   | 6580   | -1690 | 1090  | -480 | O0 |
| ATOM 11898 CB ASP D 153    | -11.151 | 25.807 | 16.580 | 1.00  | 55.28 |      | C0 |
| ANISOU11898 CB ASP D 153   | 6610    | 7130   | 7260   | -2010 | 1300  | -340 | C0 |
| ATOM 11899 CG ASP D 153    | -10.077 | 25.477 | 15.558 | 1.00  | 57.02 |      | C0 |
| ANISOU11899 CG ASP D 153   | 6720    | 7500   | 7440   | -2060 | 1420  | -260 | C0 |
| ATOM 11900 OD1 ASP D 153   | -10.433 | 24.946 | 14.489 | 1.00  | 57.64 |      | O0 |
| ANISOU11900 OD1 ASP D 153  | 6860    | 7600   | 7430   | -1960 | 1480  | -170 | O0 |
| ATOM 11901 OD2 ASP D 153   | -8.892  | 25.731 | 15.851 | 1.00  | 59.27 |      | O0 |
| ANISOU11901 OD2 ASP D 153  | 6840    | 7900   | 7780   | -2210 | 1440  | -280 | O0 |
| ATOM 11902 H ASP D 153     | -12.810 | 23.566 | 16.366 | 1.00  | 50.06 |      | H0 |
| ANISOU11902 H ASP D 153    | 6030    | 6560   | 6430   | -1630 | 1230  | -350 | H0 |
| ATOM 11903 HA ASP D 153    | -10.697 | 24.368 | 17.989 | 1.00  | 53.14 |      | H0 |
| ANISOU11903 HA ASP D 153   | 6140    | 7100   | 6960   | -1890 | 1200  | -480 | H0 |
| ATOM 11904 HB2 ASP D 153   | -11.955 | 26.095 | 16.101 | 1.00  | 54.83 |      | H0 |
| ANISOU11904 HB2 ASP D 153  | 6690    | 6960   | 7180   | -1960 | 1300  | -290 | H0 |
| ATOM 11905 HB3 ASP D 153   | -10.837 | 26.554 | 17.129 | 1.00  | 56.13 |      | H0 |

|             |                |         |        |        |       |       |      |    |
|-------------|----------------|---------|--------|--------|-------|-------|------|----|
| ANISOU11905 | HB3 ASP D 153  | 6710    | 7180   | 7440   | -2130 | 1270  | -390 | H0 |
| ATOM 11906  | N PRO D 154    | -12.225 | 25.369 | 19.730 | 1.00  | 52.26 |      | N0 |
| ANISOU11906 | N PRO D 154    | 6200    | 6760   | 6900   | -1870 | 1030  | -630 | N0 |
| ATOM 11907  | CA PRO D 154   | -13.195 | 25.881 | 20.691 | 1.00  | 51.51 |      | C0 |
| ANISOU11907 | CA PRO D 154   | 6210    | 6540   | 6810   | -1830 | 950   | -710 | C0 |
| ATOM 11908  | C PRO D 154    | -13.591 | 27.318 | 20.330 | 1.00  | 52.30 |      | C0 |
| ANISOU11908 | C PRO D 154    | 6480    | 6400   | 6990   | -1930 | 970   | -700 | C0 |
| ATOM 11909  | O PRO D 154    | -12.735 | 28.092 | 19.981 | 1.00  | 53.75 |      | O0 |
| ANISOU11909 | O PRO D 154    | 6640    | 6540   | 7240   | -2100 | 1020  | -680 | O0 |
| ATOM 11910  | CB PRO D 154   | -12.446 | 25.808 | 22.028 | 1.00  | 52.55 |      | C0 |
| ANISOU11910 | CB PRO D 154   | 6200    | 6810   | 6950   | -1900 | 870   | -840 | C0 |
| ATOM 11911  | CG PRO D 154   | -10.988 | 25.955 | 21.643 | 1.00  | 54.24 |      | C0 |
| ANISOU11911 | CG PRO D 154   | 6260    | 7140   | 7210   | -2060 | 920   | -820 | C0 |
| ATOM 11912  | CD PRO D 154   | -10.864 | 25.300 | 20.282 | 1.00  | 53.58 |      | C0 |
| ANISOU11912 | CD PRO D 154   | 6170    | 7100   | 7090   | -1990 | 1020  | -680 | C0 |
| ATOM 11913  | HA PRO D 154   | -13.988 | 25.292 | 20.717 | 1.00  | 50.34 |      | H0 |
| ANISOU11913 | HA PRO D 154   | 6110    | 6400   | 6620   | -1700 | 920   | -700 | H0 |
| ATOM 11914  | HB2 PRO D 154  | -12.725 | 26.533 | 22.628 | 1.00  | 53.03 |      | H0 |
| ANISOU11914 | HB2 PRO D 154  | 6330    | 6780   | 7040   | -1950 | 830   | -920 | H0 |
| ATOM 11915  | HB3 PRO D 154  | -12.605 | 24.949 | 22.472 | 1.00  | 51.55 |      | H0 |
| ANISOU11915 | HB3 PRO D 154  | 6020    | 6790   | 6770   | -1790 | 830   | -850 | H0 |
| ATOM 11916  | HG2 PRO D 154  | -10.736 | 26.900 | 21.595 | 1.00  | 55.44 |      | H0 |
| ANISOU11916 | HG2 PRO D 154  | 6450    | 7190   | 7420   | -2200 | 930   | -840 | H0 |
| ATOM 11917  | HG3 PRO D 154  | -10.411 | 25.508 | 22.295 | 1.00  | 54.39 |      | H0 |
| ANISOU11917 | HG3 PRO D 154  | 6140    | 7310   | 7210   | -2060 | 880   | -870 | H0 |
| ATOM 11918  | HD2 PRO D 154  | -10.233 | 25.785 | 19.718 | 1.00  | 54.77 |      | H0 |
| ANISOU11918 | HD2 PRO D 154  | 6290    | 7240   | 7280   | -2110 | 1080  | -640 | H0 |
| ATOM 11919  | HD3 PRO D 154  | -10.569 | 24.375 | 20.364 | 1.00  | 53.06 |      | H0 |
| ANISOU11919 | HD3 PRO D 154  | 6010    | 7170   | 6980   | -1900 | 1020  | -670 | H0 |
| ATOM 11920  | N THR D 155    | -14.888 | 27.606 | 20.370 | 1.00  | 52.06 |      | N0 |
| ANISOU11920 | N THR D 155    | 6600    | 6230   | 6950   | -1810 | 950   | -690 | N0 |
| ATOM 11921  | CA THR D 155   | -15.454 | 28.977 | 20.378 | 1.00  | 54.16 |      | C0 |
| ANISOU11921 | CA THR D 155   | 7040    | 6250   | 7290   | -1850 | 960   | -700 | C0 |
| ATOM 11922  | C THR D 155    | -16.194 | 29.151 | 21.709 | 1.00  | 53.47 |      | C0 |
| ANISOU11922 | C THR D 155    | 6990    | 6130   | 7190   | -1770 | 870   | -840 | C0 |
| ATOM 11923  | O THR D 155    | -16.691 | 28.142 | 22.236 | 1.00  | 51.56 |      | O0 |
| ANISOU11923 | O THR D 155    | 6680    | 6040   | 6870   | -1630 | 820   | -870 | O0 |
| ATOM 11924  | CB THR D 155   | -16.325 | 29.221 | 19.138 | 1.00  | 54.38 |      | C0 |
| ANISOU11924 | CB THR D 155   | 7210    | 6150   | 7300   | -1750 | 1010  | -540 | C0 |
| ATOM 11925  | OG1 THR D 155  | -16.433 | 30.634 | 18.970 | 1.00  | 57.68 |      | O0 |
| ANISOU11925 | OG1 THR D 155  | 7780    | 6320   | 7810   | -1840 | 1040  | -520 | O0 |
| ATOM 11926  | CG2 THR D 155  | -17.706 | 28.610 | 19.236 | 1.00  | 53.13 |      | C0 |
| ANISOU11926 | CG2 THR D 155  | 7090    | 6030   | 7070   | -1540 | 960   | -530 | C0 |
| ATOM 11927  | H THR D 155    | -15.535 | 26.965 | 20.395 | 1.00  | 50.96 |      | H0 |
| ANISOU11927 | H THR D 155    | 6470    | 6140   | 6750   | -1680 | 930   | -680 | H0 |
| ATOM 11928  | HA THR D 155   | -14.704 | 29.613 | 20.357 | 1.00  | 55.38 |      | H0 |
| ANISOU11928 | HA THR D 155   | 7190    | 6350   | 7510   | -2000 | 980   | -720 | H0 |
| ATOM 11929  | HB THR D 155   | -15.863 | 28.839 | 18.354 | 1.00  | 54.57 |      | H0 |
| ANISOU11929 | HB THR D 155   | 7180    | 6250   | 7290   | -1790 | 1060  | -460 | H0 |
| ATOM 11930  | HG21 THR D 155 | -17.646 | 27.730 | 19.649 | 1.00  | 51.95 |      | H0 |
| ANISOU11930 | HG21 THR D 155 | 6850    | 6020   | 6870   | -1500 | 930   | -570 | H0 |
| ATOM 11931  | HG22 THR D 155 | -18.087 | 28.522 | 18.343 | 1.00  | 52.85 |      | H0 |
| ANISOU11931 | HG22 THR D 155 | 7100    | 5980   | 7000   | -1490 | 990   | -430 | H0 |
| ATOM 11932  | HG23 THR D 155 | -18.279 | 29.183 | 19.776 | 1.00  | 53.38 |      | H0 |

|             |      |           |         |        |        |       |       |       |    |
|-------------|------|-----------|---------|--------|--------|-------|-------|-------|----|
| ANISOU11932 | HG23 | THR D 155 | 7200    | 5960   | 7130   | -1500 | 930   | -580  | H0 |
| ATOM 11933  | N    | THR D 156 | -16.228 | 30.365 | 22.253 | 1.00  | 55.22 |       | N0 |
| ANISOU11933 | N    | THR D 156 | 7320    | 6160   | 7490   | -1850 | 870   | -940  | N0 |
| ATOM 11934  | CA   | THR D 156 | -16.939 | 30.681 | 23.521 | 1.00  | 56.19 |       | C0 |
| ANISOU11934 | CA   | THR D 156 | 7500    | 6240   | 7600   | -1770 | 800   | -1090 | C0 |
| ATOM 11935  | C    | THR D 156 | -17.824 | 31.909 | 23.291 | 1.00  | 57.97 |       | C0 |
| ANISOU11935 | C    | THR D 156 | 7940    | 6180   | 7900   | -1710 | 830   | -1080 | C0 |
| ATOM 11936  | O    | THR D 156 | -17.472 | 32.735 | 22.430 | 1.00  | 58.46 |       | O0 |
| ANISOU11936 | O    | THR D 156 | 8100    | 6060   | 8050   | -1820 | 900   | -990  | O0 |
| ATOM 11937  | CB   | THR D 156 | -15.950 | 30.846 | 24.685 | 1.00  | 57.28 |       | C0 |
| ANISOU11937 | CB   | THR D 156 | 7550    | 6470   | 7750   | -1920 | 740   | -1270 | C0 |
| ATOM 11938  | OG1  | THR D 156 | -15.047 | 31.918 | 24.411 | 1.00  | 58.92 |       | O0 |
| ANISOU11938 | OG1  | THR D 156 | 7800    | 6520   | 8060   | -2150 | 780   | -1290 | O0 |
| ATOM 11939  | CG2  | THR D 156 | -15.142 | 29.594 | 24.949 | 1.00  | 56.38 |       | C0 |
| ANISOU11939 | CG2  | THR D 156 | 7210    | 6650   | 7560   | -1940 | 700   | -1260 | C0 |
| ATOM 11940  | H    | THR D 156 | -15.814 | 31.091 | 21.890 | 1.00  | 56.69 |       | H0 |
| ANISOU11940 | H    | THR D 156 | 7560    | 6230   | 7750   | -1960 | 900   | -920  | H0 |
| ATOM 11941  | HA   | THR D 156 | -17.528 | 29.920 | 23.730 | 1.00  | 54.73 |       | H0 |
| ANISOU11941 | HA   | THR D 156 | 7270    | 6170   | 7350   | -1630 | 770   | -1080 | H0 |
| ATOM 11942  | HB   | THR D 156 | -16.465 | 31.066 | 25.498 | 1.00  | 57.41 |       | H0 |
| ANISOU11942 | HB   | THR D 156 | 7610    | 6460   | 7740   | -1860 | 700   | -1370 | H0 |
| ATOM 11943  | HG21 | THR D 156 | -15.744 | 28.845 | 25.107 | 1.00  | 54.93 |       | H0 |
| ANISOU11943 | HG21 | THR D 156 | 7000    | 6560   | 7300   | -1790 | 680   | -1230 | H0 |
| ATOM 11944  | HG22 | THR D 156 | -14.579 | 29.728 | 25.732 | 1.00  | 57.16 |       | H0 |
| ANISOU11944 | HG22 | THR D 156 | 7250    | 6820   | 7650   | -2030 | 660   | -1370 | H0 |
| ATOM 11945  | HG23 | THR D 156 | -14.581 | 29.399 | 24.177 | 1.00  | 56.31 |       | H0 |
| ANISOU11945 | HG23 | THR D 156 | 7150    | 6680   | 7570   | -2000 | 750   | -1170 | H0 |
| ATOM 11946  | N    | GLU D 157 | -18.954 | 31.990 | 23.997 | 1.00  | 59.09 |       | N0 |
| ANISOU11946 | N    | GLU D 157 | 8150    | 6290   | 8000   | -1530 | 800   | -1150 | N0 |
| ATOM 11947  | CA   | GLU D 157 | -19.760 | 33.234 | 24.116 | 1.00  | 62.04 |       | C0 |
| ANISOU11947 | CA   | GLU D 157 | 8730    | 6400   | 8450   | -1450 | 830   | -1190 | C0 |
| ATOM 11948  | C    | GLU D 157 | -19.273 | 33.963 | 25.373 | 1.00  | 63.22 |       | C0 |
| ANISOU11948 | C    | GLU D 157 | 8920    | 6470   | 8630   | -1570 | 790   | -1420 | C0 |
| ATOM 11949  | O    | GLU D 157 | -18.863 | 33.281 | 26.333 | 1.00  | 62.11 |       | O0 |
| ANISOU11949 | O    | GLU D 157 | 8650    | 6550   | 8410   | -1600 | 730   | -1540 | O0 |
| ATOM 11950  | CB   | GLU D 157 | -21.265 | 32.943 | 24.093 | 1.00  | 62.89 |       | C0 |
| ANISOU11950 | CB   | GLU D 157 | 8870    | 6530   | 8490   | -1190 | 820   | -1130 | C0 |
| ATOM 11951  | CG   | GLU D 157 | -21.774 | 32.075 | 25.234 | 1.00  | 63.80 |       | C0 |
| ANISOU11951 | CG   | GLU D 157 | 8870    | 6870   | 8500   | -1080 | 770   | -1240 | C0 |
| ATOM 11952  | CD   | GLU D 157 | -23.209 | 31.588 | 25.064 | 1.00  | 64.26 |       | C0 |
| ANISOU11952 | CD   | GLU D 157 | 8910    | 7010   | 8490   | -840  | 770   | -1140 | C0 |
| ATOM 11953  | OE1  | GLU D 157 | -24.120 | 32.444 | 24.996 | 1.00  | 66.28 |       | O0 |
| ANISOU11953 | OE1  | GLU D 157 | 9290    | 7100   | 8780   | -700  | 800   | -1140 | O0 |
| ATOM 11954  | OE2  | GLU D 157 | -23.415 | 30.353 | 24.987 | 1.00  | 63.64 |       | O0 |
| ANISOU11954 | OE2  | GLU D 157 | 8690    | 7160   | 8330   | -800  | 740   | -1080 | O0 |
| ATOM 11955  | H    | GLU D 157 | -19.293 | 31.281 | 24.454 | 1.00  | 57.91 |       | H0 |
| ANISOU11955 | H    | GLU D 157 | 7930    | 6290   | 7780   | -1440 | 770   | -1170 | H0 |
| ATOM 11956  | HA   | GLU D 157 | -19.551 | 33.801 | 23.339 | 1.00  | 62.92 |       | H0 |
| ANISOU11956 | HA   | GLU D 157 | 8920    | 6360   | 8630   | -1510 | 880   | -1100 | H0 |
| ATOM 11957  | HB2  | GLU D 157 | -21.744 | 33.798 | 24.112 | 1.00  | 64.22 |       | H0 |
| ANISOU11957 | HB2  | GLU D 157 | 9170    | 6520   | 8710   | -1130 | 850   | -1140 | H0 |
| ATOM 11958  | HB3  | GLU D 157 | -21.480 | 32.503 | 23.244 | 1.00  | 62.02 |       | H0 |
| ANISOU11958 | HB3  | GLU D 157 | 8730    | 6470   | 8360   | -1140 | 840   | -990  | H0 |
| ATOM 11959  | HG2  | GLU D 157 | -21.192 | 31.292 | 25.325 | 1.00  | 62.61 |       | H0 |



|             |      |           |         |        |        |       |       |       |    |
|-------------|------|-----------|---------|--------|--------|-------|-------|-------|----|
| ANISOU11959 | HG2  | GLU D 157 | 8600    | 6890   | 8310   | -1150 | 740   | -1230 | H0 |
| ATOM 11960  | HG3  | GLU D 157 | -21.718 | 32.584 | 26.070 | 1.00  | 64.67 |       | H0 |
| ANISOU11960 | HG3  | GLU D 157 | 9030    | 6930   | 8620   | -1090 | 750   | -1370 | H0 |
| ATOM 11961  | N    | ASN D 158 | -19.276 | 35.297 | 25.338 | 1.00  | 65.69 |       | N0 |
| ANISOU11961 | N    | ASN D 158 | 9430    | 6470   | 9050   | -1630 | 830   | -1470 | N0 |
| ATOM 11962  | CA   | ASN D 158 | -18.727 | 36.179 | 26.403 | 1.00  | 68.11 |       | C0 |
| ANISOU11962 | CA   | ASN D 158 | 9820    | 6650   | 9410   | -1780 | 810   | -1710 | C0 |
| ATOM 11963  | C    | ASN D 158 | -19.500 | 35.969 | 27.715 | 1.00  | 68.72 |       | C0 |
| ANISOU11963 | C    | ASN D 158 | 9890    | 6840   | 9380   | -1610 | 760   | -1890 | C0 |
| ATOM 11964  | O    | ASN D 158 | -18.908 | 36.195 | 28.792 | 1.00  | 70.33 |       | O0 |
| ANISOU11964 | O    | ASN D 158 | 10080   | 7090   | 9550   | -1740 | 700   | -2100 | O0 |
| ATOM 11965  | CB   | ASN D 158 | -18.754 | 37.647 | 25.973 | 1.00  | 70.02 |       | C0 |
| ANISOU11965 | CB   | ASN D 158 | 10310   | 6490   | 9800   | -1850 | 870   | -1710 | C0 |
| ATOM 11966  | CG   | ASN D 158 | -18.102 | 38.564 | 26.983 | 1.00  | 72.40 |       | C0 |
| ANISOU11966 | CG   | ASN D 158 | 10710   | 6640   | 10160  | -2050 | 850   | -1970 | C0 |
| ATOM 11967  | OD1  | ASN D 158 | -17.102 | 38.204 | 27.598 | 1.00  | 72.22 |       | O0 |
| ANISOU11967 | OD1  | ASN D 158 | 10540   | 6810   | 10090  | -2250 | 780   | -2090 | O0 |
| ATOM 11968  | ND2  | ASN D 158 | -18.663 | 39.748 | 27.164 | 1.00  | 74.80 |       | N0 |
| ANISOU11968 | ND2  | ASN D 158 | 11270   | 6600   | 10550  | -1990 | 890   | -2050 | N0 |
| ATOM 11969  | H    | ASN D 158 | -19.629 | 35.760 | 24.636 | 1.00  | 66.22 |       | H0 |
| ANISOU11969 | H    | ASN D 158 | 9600    | 6380   | 9170   | -1580 | 880   | -1370 | H0 |
| ATOM 11970  | HA   | ASN D 158 | -17.785 | 35.928 | 26.552 | 1.00  | 68.17 |       | H0 |
| ANISOU11970 | HA   | ASN D 158 | 9720    | 6770   | 9410   | -1950 | 780   | -1750 | H0 |
| ATOM 11971  | HB2  | ASN D 158 | -18.290 | 37.734 | 25.116 | 1.00  | 70.31 |       | H0 |
| ANISOU11971 | HB2  | ASN D 158 | 10340   | 6480   | 9890   | -1950 | 910   | -1580 | H0 |
| ATOM 11972  | HB3  | ASN D 158 | -19.685 | 37.922 | 25.844 | 1.00  | 70.22 |       | H0 |
| ANISOU11972 | HB3  | ASN D 158 | 10440   | 6410   | 9830   | -1660 | 900   | -1670 | H0 |
| ATOM 11973  | HD21 | ASN D 158 | -18.550 | 40.179 | 27.928 | 1.00  | 76.19 |       | H0 |
| ANISOU11973 | HD21 | ASN D 158 | 11510   | 6710   | 10730  | -2040 | 870   | -2230 | H0 |
| ATOM 11974  | HD22 | ASN D 158 | -19.149 | 40.112 | 26.521 | 1.00  | 75.11 |       | H0 |
| ANISOU11974 | HD22 | ASN D 158 | 11410   | 6470   | 10650  | -1890 | 940   | -1930 | H0 |
| ATOM 11975  | N    | SER D 159 | -20.766 | 35.551 | 27.627 | 1.00  | 68.36 |       | N0 |
| ANISOU11975 | N    | SER D 159 | 9850    | 6850   | 9270   | -1340 | 770   | -1800 | N0 |
| ATOM 11976  | CA   | SER D 159 | -21.689 | 35.350 | 28.777 | 1.00  | 69.67 |       | C0 |
| ANISOU11976 | CA   | SER D 159 | 10010   | 7130   | 9330   | -1150 | 750   | -1940 | C0 |
| ATOM 11977  | C    | SER D 159 | -21.135 | 34.311 | 29.765 | 1.00  | 68.62 |       | C0 |
| ANISOU11977 | C    | SER D 159 | 9680    | 7330   | 9060   | -1210 | 670   | -2040 | C0 |
| ATOM 11978  | O    | SER D 159 | -20.229 | 33.540 | 29.387 | 1.00  | 66.18 |       | O0 |
| ANISOU11978 | O    | SER D 159 | 9220    | 7180   | 8740   | -1360 | 640   | -1960 | O0 |
| ATOM 11979  | CB   | SER D 159 | -23.067 | 34.982 | 28.297 | 1.00  | 68.81 |       | C0 |
| ANISOU11979 | CB   | SER D 159 | 9900    | 7060   | 9180   | -880  | 780   | -1790 | C0 |
| ATOM 11980  | OG   | SER D 159 | -23.722 | 36.120 | 27.753 | 1.00  | 71.56 |       | O0 |
| ANISOU11980 | OG   | SER D 159 | 10450   | 7110   | 9640   | -760  | 850   | -1740 | O0 |
| ATOM 11981  | H    | SER D 159 | -21.172 | 35.374 | 26.832 | 1.00  | 67.66 |       | H0 |
| ANISOU11981 | H    | SER D 159 | 9770    | 6750   | 9200   | -1260 | 800   | -1650 | H0 |
| ATOM 11982  | HA   | SER D 159 | -21.756 | 36.217 | 29.260 | 1.00  | 71.37 |       | H0 |
| ANISOU11982 | HA   | SER D 159 | 10360   | 7170   | 9580   | -1150 | 760   | -2080 | H0 |
| ATOM 11983  | HB2  | SER D 159 | -23.001 | 34.279 | 27.612 | 1.00  | 67.39 |       | H0 |
| ANISOU11983 | HB2  | SER D 159 | 9620    | 7000   | 8990   | -880  | 780   | -1640 | H0 |
| ATOM 11984  | HB3  | SER D 159 | -23.593 | 34.629 | 29.050 | 1.00  | 68.56 |       | H0 |
| ANISOU11984 | HB3  | SER D 159 | 9810    | 7170   | 9060   | -760  | 760   | -1860 | H0 |
| ATOM 11985  | N    | ASP D 160 | -21.674 | 34.320 | 30.991 | 1.00  | 70.39 |       | N0 |
| ANISOU11985 | N    | ASP D 160 | 9910    | 7650   | 9180   | -1100 | 640   | -2210 | N0 |
| ATOM 11986  | CA   | ASP D 160 | -21.225 | 33.509 | 32.157 | 1.00  | 70.70 |       | C0 |

|             |     |           |         |        |        |       |       |       |    |
|-------------|-----|-----------|---------|--------|--------|-------|-------|-------|----|
| ANISOU11986 | CA  | ASP D 160 | 9800    | 7990   | 9070   | -1150 | 570   | -2320 | C0 |
| ATOM 11987  | C   | ASP D 160 | -21.404 | 32.020 | 31.836 | 1.00  | 68.88 |       | C0 |
| ANISOU11987 | C   | ASP D 160 | 9370    | 8030   | 8760   | -1070 | 550   | -2130 | C0 |
| ATOM 11988  | O   | ASP D 160 | -22.402 | 31.674 | 31.171 | 1.00  | 68.84 |       | O0 |
| ANISOU11988 | O   | ASP D 160 | 9370    | 8020   | 8770   | -900  | 590   | -1980 | O0 |
| ATOM 11989  | CB  | ASP D 160 | -21.981 | 33.922 | 33.426 | 1.00  | 72.38 |       | C0 |
| ANISOU11989 | CB  | ASP D 160 | 10090   | 8230   | 9180   | -1000 | 570   | -2520 | C0 |
| ATOM 11990  | CG  | ASP D 160 | -21.522 | 33.217 | 34.691 | 1.00  | 72.55 |       | C0 |
| ANISOU11990 | CG  | ASP D 160 | 9970    | 8560   | 9030   | -1050 | 490   | -2650 | C0 |
| ATOM 11991  | OD1 | ASP D 160 | -21.708 | 31.987 | 34.774 | 1.00  | 70.93 |       | O0 |
| ANISOU11991 | OD1 | ASP D 160 | 9600    | 8620   | 8730   | -970  | 470   | -2510 | O0 |
| ATOM 11992  | OD2 | ASP D 160 | -20.983 | 33.904 | 35.588 | 1.00  | 75.32 |       | O0 |
| ANISOU11992 | OD2 | ASP D 160 | 10390   | 8880   | 9340   | -1160 | 450   | -2880 | O0 |
| ATOM 11993  | H   | ASP D 160 | -22.387 | 34.852 | 31.191 | 1.00  | 71.16 |       | H0 |
| ANISOU11993 | H   | ASP D 160 | 10120   | 7630   | 9290   | -980  | 680   | -2260 | H0 |
| ATOM 11994  | HA  | ASP D 160 | -20.265 | 33.684 | 32.300 | 1.00  | 71.56 |       | H0 |
| ANISOU11994 | HA  | ASP D 160 | 9880    | 8100   | 9200   | -1330 | 530   | -2400 | H0 |
| ATOM 11995  | HB2 | ASP D 160 | -21.875 | 34.887 | 33.557 | 1.00  | 74.25 |       | H0 |
| ANISOU11995 | HB2 | ASP D 160 | 10470   | 8260   | 9480   | -1050 | 580   | -2650 | H0 |
| ATOM 11996  | HB3 | ASP D 160 | -22.934 | 33.736 | 33.300 | 1.00  | 71.67 |       | H0 |
| ANISOU11996 | HB3 | ASP D 160 | 10010   | 8150   | 9070   | -820  | 610   | -2450 | H0 |
| ATOM 11997  | N   | ASP D 161 | -20.480 | 31.181 | 32.320 | 1.00  | 68.66 |       | N0 |
| ANISOU11997 | N   | ASP D 161 | 9180    | 8250   | 8660   | -1180 | 480   | -2150 | N0 |
| ATOM 11998  | CA  | ASP D 161 | -20.375 | 29.732 | 31.988 | 1.00  | 66.92 |       | C0 |
| ANISOU11998 | CA  | ASP D 161 | 8790    | 8260   | 8380   | -1140 | 460   | -1970 | C0 |
| ATOM 11999  | C   | ASP D 161 | -21.647 | 28.984 | 32.418 | 1.00  | 65.87 |       | C0 |
| ANISOU11999 | C   | ASP D 161 | 8620    | 8270   | 8140   | -930  | 480   | -1910 | C0 |
| ATOM 12000  | O   | ASP D 161 | -21.970 | 27.972 | 31.760 | 1.00  | 64.61 |       | O0 |
| ANISOU12000 | O   | ASP D 161 | 8370    | 8200   | 7970   | -860  | 490   | -1730 | O0 |
| ATOM 12001  | CB  | ASP D 161 | -19.128 | 29.104 | 32.623 | 1.00  | 67.33 |       | C0 |
| ANISOU12001 | CB  | ASP D 161 | 8680    | 8540   | 8360   | -1280 | 390   | -2020 | C0 |
| ATOM 12002  | CG  | ASP D 161 | -17.817 | 29.488 | 31.952 | 1.00  | 68.39 |       | C0 |
| ANISOU12002 | CG  | ASP D 161 | 8780    | 8600   | 8600   | -1500 | 380   | -2020 | C0 |
| ATOM 12003  | OD1 | ASP D 161 | -17.786 | 29.543 | 30.703 | 1.00  | 67.93 |       | O0 |
| ANISOU12003 | OD1 | ASP D 161 | 8750    | 8410   | 8650   | -1520 | 440   | -1880 | O0 |
| ATOM 12004  | OD2 | ASP D 161 | -16.834 | 29.727 | 32.684 | 1.00  | 69.09 |       | O0 |
| ANISOU12004 | OD2 | ASP D 161 | 8800    | 8790   | 8650   | -1650 | 310   | -2150 | O0 |
| ATOM 12005  | H   | ASP D 161 | -19.839 | 31.461 | 32.904 | 1.00  | 69.82 |       | H0 |
| ANISOU12005 | H   | ASP D 161 | 9320    | 8430   | 8780   | -1290 | 440   | -2270 | H0 |
| ATOM 12006  | HA  | ASP D 161 | -20.290 | 29.653 | 31.010 | 1.00  | 66.19 |       | H0 |
| ANISOU12006 | HA  | ASP D 161 | 8700    | 8090   | 8360   | -1160 | 500   | -1850 | H0 |
| ATOM 12007  | HB2 | ASP D 161 | -19.081 | 29.371 | 33.564 | 1.00  | 68.42 |       | H0 |
| ANISOU12007 | HB2 | ASP D 161 | 8830    | 8740   | 8420   | -1290 | 350   | -2160 | H0 |
| ATOM 12008  | HB3 | ASP D 161 | -19.213 | 28.129 | 32.589 | 1.00  | 66.00 |       | H0 |
| ANISOU12008 | HB3 | ASP D 161 | 8410    | 8520   | 8140   | -1220 | 380   | -1920 | H0 |
| ATOM 12009  | N   | SER D 162 | -22.333 | 29.450 | 33.471 | 1.00  | 65.95 |       | N0 |
| ANISOU12009 | N   | SER D 162 | 8690    | 8300   | 8070   | -820  | 480   | -2050 | N0 |
| ATOM 12010  | CA  | SER D 162 | -23.506 | 28.773 | 34.088 | 1.00  | 64.66 |       | C0 |
| ANISOU12010 | CA  | SER D 162 | 8470    | 8310   | 7780   | -630  | 510   | -2010 | C0 |
| ATOM 12011  | C   | SER D 162 | -24.788 | 29.596 | 33.890 | 1.00  | 64.71 |       | C0 |
| ANISOU12011 | C   | SER D 162 | 8600    | 8150   | 7830   | -460  | 580   | -2020 | C0 |
| ATOM 12012  | O   | SER D 162 | -25.676 | 29.512 | 34.759 | 1.00  | 64.24 |       | O0 |
| ANISOU12012 | O   | SER D 162 | 8530    | 8220   | 7660   | -310  | 600   | -2070 | O0 |
| ATOM 12013  | CB  | SER D 162 | -23.253 | 28.498 | 35.553 | 1.00  | 64.99 |       | C0 |

|             |     |           |         |        |        |      |       |       |    |
|-------------|-----|-----------|---------|--------|--------|------|-------|-------|----|
| ANISOU12013 | CB  | SER D 162 | 8460    | 8570   | 7660   | -630 | 460   | -2140 | C0 |
| ATOM 12014  | OG  | SER D 162 | -23.262 | 29.702 | 36.300 | 1.00 | 67.11 |       | O0 |
| ANISOU12014 | OG  | SER D 162 | 8860    | 8730   | 7910   | -640 | 460   | -2370 | O0 |
| ATOM 12015  | H   | SER D 162 | -22.120 | 30.223 | 33.901 | 1.00 | 67.54 |       | H0 |
| ANISOU12015 | H   | SER D 162 | 8970    | 8420   | 8280   | -870 | 480   | -2190 | H0 |
| ATOM 12016  | HA  | SER D 162 | -23.631 | 27.900 | 33.630 | 1.00 | 63.07 |       | H0 |
| ANISOU12016 | HA  | SER D 162 | 8190    | 8200   | 7580   | -610 | 510   | -1860 | H0 |
| ATOM 12017  | HB2 | SER D 162 | -23.946 | 27.892 | 35.898 | 1.00 | 64.45 |       | H0 |
| ANISOU12017 | HB2 | SER D 162 | 8330    | 8640   | 7510   | -520 | 470   | -2080 | H0 |
| ATOM 12018  | HB3 | SER D 162 | -22.380 | 28.055 | 35.656 | 1.00 | 64.82 |       | H0 |
| ANISOU12018 | HB3 | SER D 162 | 8360    | 8650   | 7620   | -740 | 410   | -2130 | H0 |
| ATOM 12019  | N   | GLU D 163 | -24.899 | 30.335 | 32.780 | 1.00 | 64.56 |       | N0 |
| ANISOU12019 | N   | GLU D 163 | 8690    | 7890   | 7950   | -470 | 620   | -1960 | N0 |
| ATOM 12020  | CA  | GLU D 163 | -26.108 | 31.140 | 32.452 | 1.00 | 65.16 |       | C0 |
| ANISOU12020 | CA  | GLU D 163 | 8880    | 7800   | 8080   | -280 | 680   | -1940 | C0 |
| ATOM 12021  | C   | GLU D 163 | -27.253 | 30.204 | 32.031 | 1.00 | 61.65 |       | C0 |
| ANISOU12021 | C   | GLU D 163 | 8320    | 7520   | 7590   | -120 | 700   | -1760 | C0 |
| ATOM 12022  | O   | GLU D 163 | -28.411 | 30.633 | 32.129 | 1.00 | 61.81 |       | O0 |
| ANISOU12022 | O   | GLU D 163 | 8370    | 7510   | 7600   | 70   | 750   | -1750 | O0 |
| ATOM 12023  | CB  | GLU D 163 | -25.802 | 32.190 | 31.377 | 1.00 | 67.59 |       | C0 |
| ANISOU12023 | CB  | GLU D 163 | 9340    | 7790   | 8550   | -340 | 710   | -1910 | C0 |
| ATOM 12024  | CG  | GLU D 163 | -25.597 | 31.616 | 29.982 | 1.00 | 67.07 |       | C0 |
| ANISOU12024 | CG  | GLU D 163 | 9220    | 7710   | 8550   | -400 | 710   | -1690 | C0 |
| ATOM 12025  | CD  | GLU D 163 | -25.582 | 32.635 | 28.850 | 1.00 | 69.41 |       | C0 |
| ANISOU12025 | CD  | GLU D 163 | 9660    | 7720   | 8990   | -410 | 750   | -1610 | C0 |
| ATOM 12026  | OE1 | GLU D 163 | -26.251 | 33.683 | 28.979 | 1.00 | 70.38 |       | O0 |
| ANISOU12026 | OE1 | GLU D 163 | 9930    | 7650   | 9160   | -280 | 800   | -1670 | O0 |
| ATOM 12027  | OE2 | GLU D 163 | -24.903 | 32.372 | 27.831 | 1.00 | 70.51 |       | O0 |
| ANISOU12027 | OE2 | GLU D 163 | 9780    | 7830   | 9180   | -540 | 750   | -1490 | O0 |
| ATOM 12028  | H   | GLU D 163 | -24.240 | 30.385 | 32.154 | 1.00 | 64.31 |       | H0 |
| ANISOU12028 | H   | GLU D 163 | 8660    | 7780   | 7990   | -580 | 600   | -1920 | H0 |
| ATOM 12029  | HA  | GLU D 163 | -26.386 | 31.613 | 33.271 | 1.00 | 66.43 |       | H0 |
| ANISOU12029 | HA  | GLU D 163 | 9090    | 7960   | 8190   | -210 | 700   | -2080 | H0 |
| ATOM 12030  | HB2 | GLU D 163 | -26.543 | 32.830 | 31.351 | 1.00 | 68.53 |       | H0 |
| ANISOU12030 | HB2 | GLU D 163 | 9550    | 7790   | 8700   | -200 | 760   | -1930 | H0 |
| ATOM 12031  | HB3 | GLU D 163 | -24.994 | 32.677 | 31.640 | 1.00 | 68.50 |       | H0 |
| ANISOU12031 | HB3 | GLU D 163 | 9510    | 7820   | 8700   | -470 | 700   | -2020 | H0 |
| ATOM 12032  | HG2 | GLU D 163 | -24.747 | 31.127 | 29.964 | 1.00 | 66.38 |       | H0 |
| ANISOU12032 | HG2 | GLU D 163 | 9060    | 7710   | 8460   | -540 | 680   | -1690 | H0 |
| ATOM 12033  | HG3 | GLU D 163 | -26.309 | 30.970 | 29.797 | 1.00 | 65.99 |       | H0 |
| ANISOU12033 | HG3 | GLU D 163 | 9000    | 7700   | 8370   | -300 | 710   | -1590 | H0 |
| ATOM 12034  | N   | TYR D 164 | -26.945 | 28.982 | 31.575 | 1.00 | 57.95 |       | N0 |
| ANISOU12034 | N   | TYR D 164 | 7710    | 7210   | 7100   | -200 | 670   | -1610 | N0 |
| ATOM 12035  | CA  | TYR D 164 | -27.941 | 27.967 | 31.136 | 1.00 | 55.05 |       | C0 |
| ANISOU12035 | CA  | TYR D 164 | 7230    | 7000   | 6690   | -110 | 680   | -1440 | C0 |
| ATOM 12036  | C   | TYR D 164 | -27.905 | 26.727 | 32.040 | 1.00 | 51.34 |       | C0 |
| ANISOU12036 | C   | TYR D 164 | 6620    | 6790   | 6100   | -120 | 650   | -1430 | C0 |
| ATOM 12037  | O   | TYR D 164 | -28.603 | 25.748 | 31.727 | 1.00 | 50.15 |       | O0 |
| ANISOU12037 | O   | TYR D 164 | 6370    | 6770   | 5920   | -80  | 650   | -1280 | O0 |
| ATOM 12038  | CB  | TYR D 164 | -27.702 | 27.596 | 29.670 | 1.00 | 55.44 |       | C0 |
| ANISOU12038 | CB  | TYR D 164 | 7270    | 6970   | 6820   | -180 | 670   | -1280 | C0 |
| ATOM 12039  | CG  | TYR D 164 | -27.816 | 28.757 | 28.714 | 1.00 | 58.00 |       | C0 |
| ANISOU12039 | CG  | TYR D 164 | 7730    | 7050   | 7260   | -150 | 700   | -1250 | C0 |
| ATOM 12040  | CD1 | TYR D 164 | -28.865 | 29.659 | 28.813 | 1.00 | 60.99 |       | C0 |

|             |               |         |        |        |      |       |       |    |
|-------------|---------------|---------|--------|--------|------|-------|-------|----|
| ANISOU12040 | CD1 TYR D 164 | 8180    | 7330   | 7660   | 30   | 740   | -1270 | C0 |
| ATOM 12041  | CD2 TYR D 164 | -26.874 | 28.968 | 27.720 | 1.00 | 58.85 |       | C0 |
| ANISOU12041 | CD2 TYR D 164 | 7890    | 7020   | 7450   | -290 | 690   | -1200 | C0 |
| ATOM 12042  | CE1 TYR D 164 | -28.977 | 30.738 | 27.951 | 1.00 | 62.97 |       | C0 |
| ANISOU12042 | CE1 TYR D 164 | 8570    | 7340   | 8010   | 80   | 770   | -1230 | C0 |
| ATOM 12043  | CE2 TYR D 164 | -26.973 | 30.040 | 26.846 | 1.00 | 60.97 |       | C0 |
| ANISOU12043 | CE2 TYR D 164 | 8300    | 7050   | 7820   | -260 | 730   | -1150 | C0 |
| ATOM 12044  | CZ TYR D 164  | -28.029 | 30.928 | 26.962 | 1.00 | 62.61 |       | C0 |
| ANISOU12044 | CZ TYR D 164  | 8590    | 7150   | 8050   | -80  | 760   | -1160 | C0 |
| ATOM 12045  | OH TYR D 164  | -28.146 | 31.991 | 26.117 | 1.00 | 65.53 |       | O0 |
| ANISOU12045 | OH TYR D 164  | 9100    | 7280   | 8510   | -40  | 800   | -1100 | O0 |
| ATOM 12046  | H TYR D 164   | -26.089 | 28.687 | 31.480 | 1.00 | 57.50 |       | H0 |
| ANISOU12046 | H TYR D 164   | 7630    | 7170   | 7050   | -330 | 640   | -1620 | H0 |
| ATOM 12047  | HA TYR D 164  | -28.844 | 28.365 | 31.211 | 1.00 | 55.80 |       | H0 |
| ANISOU12047 | HA TYR D 164  | 7340    | 7080   | 6780   | 30   | 710   | -1440 | H0 |
| ATOM 12048  | HB2 TYR D 164 | -26.807 | 27.206 | 29.591 | 1.00 | 54.83 |       | H0 |
| ANISOU12048 | HB2 TYR D 164 | 7170    | 6910   | 6750   | -300 | 640   | -1280 | H0 |
| ATOM 12049  | HB3 TYR D 164 | -28.352 | 26.910 | 29.412 | 1.00 | 54.61 |       | H0 |
| ANISOU12049 | HB3 TYR D 164 | 7090    | 6970   | 6690   | -130 | 670   | -1180 | H0 |
| ATOM 12050  | HD1 TYR D 164 | -29.515 | 29.540 | 29.483 | 1.00 | 61.08 |       | H0 |
| ANISOU12050 | HD1 TYR D 164 | 8150    | 7450   | 7610   | 130  | 750   | -1310 | H0 |
| ATOM 12051  | HD2 TYR D 164 | -26.153 | 28.371 | 27.634 | 1.00 | 58.06 |       | H0 |
| ANISOU12051 | HD2 TYR D 164 | 7740    | 6980   | 7340   | -400 | 670   | -1180 | H0 |
| ATOM 12052  | HE1 TYR D 164 | -29.700 | 31.338 | 28.034 | 1.00 | 63.78 |       | H0 |
| ANISOU12052 | HE1 TYR D 164 | 8720    | 7380   | 8130   | 220  | 800   | -1240 | H0 |
| ATOM 12053  | HE2 TYR D 164 | -26.323 | 30.166 | 26.175 | 1.00 | 60.67 |       | H0 |
| ANISOU12053 | HE2 TYR D 164 | 8290    | 6930   | 7830   | -360 | 730   | -1100 | H0 |
| ATOM 12054  | N PHE D 165   | -27.139 | 26.760 | 33.132 | 1.00 | 49.34 |       | N0 |
| ANISOU12054 | N PHE D 165   | 6360    | 6610   | 5770   | -190 | 620   | -1560 | N0 |
| ATOM 12055  | CA PHE D 165  | -27.004 | 25.625 | 34.080 | 1.00 | 47.37 |       | C0 |
| ANISOU12055 | CA PHE D 165  | 5990    | 6620   | 5390   | -200 | 600   | -1540 | C0 |
| ATOM 12056  | C PHE D 165   | -28.184 | 25.625 | 35.061 | 1.00 | 47.23 |       | C0 |
| ANISOU12056 | C PHE D 165   | 5940    | 6750   | 5250   | -40  | 640   | -1570 | C0 |
| ATOM 12057  | O PHE D 165   | -28.531 | 26.693 | 35.601 | 1.00 | 47.88 |       | O0 |
| ANISOU12057 | O PHE D 165   | 6110    | 6770   | 5320   | 50   | 680   | -1720 | O0 |
| ATOM 12058  | CB PHE D 165  | -25.672 | 25.684 | 34.826 | 1.00 | 47.43 |       | C0 |
| ANISOU12058 | CB PHE D 165  | 6000    | 6680   | 5350   | -330 | 540   | -1660 | C0 |
| ATOM 12059  | CG PHE D 165  | -25.354 | 24.417 | 35.577 | 1.00 | 46.63 |       | C0 |
| ANISOU12059 | CG PHE D 165  | 5770    | 6820   | 5130   | -340 | 500   | -1590 | C0 |
| ATOM 12060  | CD1 PHE D 165 | -25.028 | 23.256 | 34.891 | 1.00 | 44.54 |       | C0 |
| ANISOU12060 | CD1 PHE D 165 | 5420    | 6600   | 4900   | -390 | 490   | -1420 | C0 |
| ATOM 12061  | CD2 PHE D 165 | -25.424 | 24.372 | 36.963 | 1.00 | 47.40 |       | C0 |
| ANISOU12061 | CD2 PHE D 165 | 5840    | 7110   | 5070   | -300 | 490   | -1680 | C0 |
| ATOM 12062  | CE1 PHE D 165 | -24.746 | 22.087 | 35.578 | 1.00 | 44.36 |       | C0 |
| ANISOU12062 | CE1 PHE D 165 | 5300    | 6770   | 4780   | -390 | 460   | -1340 | C0 |
| ATOM 12063  | CE2 PHE D 165 | -25.139 | 23.200 | 37.648 | 1.00 | 46.88 |       | C0 |
| ANISOU12063 | CE2 PHE D 165 | 5660    | 7260   | 4890   | -300 | 460   | -1590 | C0 |
| ATOM 12064  | CZ PHE D 165  | -24.799 | 22.061 | 36.956 | 1.00 | 45.33 |       | C0 |
| ANISOU12064 | CZ PHE D 165  | 5390    | 7080   | 4750   | -340 | 450   | -1410 | C0 |
| ATOM 12065  | H PHE D 165   | -26.651 | 27.485 | 33.384 | 1.00 | 50.62 |       | H0 |
| ANISOU12065 | H PHE D 165   | 6600    | 6680   | 5950   | -230 | 620   | -1680 | H0 |
| ATOM 12066  | HA PHE D 165  | -27.032 | 24.782 | 33.561 | 1.00 | 46.13 |       | H0 |
| ANISOU12066 | HA PHE D 165  | 5770    | 6510   | 5250   | -230 | 590   | -1410 | H0 |
| ATOM 12067  | HB2 PHE D 165 | -24.957 | 25.861 | 34.179 | 1.00 | 47.23 |       | H0 |

|             |               |         |        |        |      |       |       |    |
|-------------|---------------|---------|--------|--------|------|-------|-------|----|
| ANISOU12067 | HB2 PHE D 165 | 5990    | 6550   | 5410   | -420 | 520   | -1650 | H0 |
| ATOM 12068  | HB3 PHE D 165 | -25.700 | 26.433 | 35.458 | 1.00 | 48.85 |       | H0 |
| ANISOU12068 | HB3 PHE D 165 | 6230    | 6830   | 5490   | -300 | 540   | -1800 | H0 |
| ATOM 12069  | HD1 PHE D 165 | -24.984 | 23.269 | 33.949 | 1.00 | 43.99 |       | H0 |
| ANISOU12069 | HD1 PHE D 165 | 5380    | 6410   | 4930   | -420 | 500   | -1360 | H0 |
| ATOM 12070  | HD2 PHE D 165 | -25.650 | 25.153 | 37.444 | 1.00 | 48.65 |       | H0 |
| ANISOU12070 | HD2 PHE D 165 | 6060    | 7240   | 5190   | -260 | 500   | -1810 | H0 |
| ATOM 12071  | HE1 PHE D 165 | -24.515 | 21.307 | 35.101 | 1.00 | 43.40 |       | H0 |
| ANISOU12071 | HE1 PHE D 165 | 5140    | 6660   | 4690   | -420 | 460   | -1230 | H0 |
| ATOM 12072  | HE2 PHE D 165 | -25.179 | 23.186 | 38.588 | 1.00 | 47.86 |       | H0 |
| ANISOU12072 | HE2 PHE D 165 | 5770    | 7530   | 4890   | -270 | 450   | -1650 | H0 |
| ATOM 12073  | HZ PHE D 165  | -24.611 | 21.262 | 37.422 | 1.00 | 45.32 |       | H0 |
| ANISOU12073 | HZ PHE D 165  | 5330    | 7210   | 4680   | -340 | 430   | -1340 | H0 |
| ATOM 12074  | N SER D 166   | -28.775 | 24.447 | 35.278 | 1.00 | 45.90 |       | N0 |
| ANISOU12074 | N SER D 166   | 5650    | 6770   | 5010   | -10  | 650   | -1430 | N0 |
| ATOM 12075  | CA SER D 166  | -29.916 | 24.209 | 36.201 | 1.00 | 46.59 |       | C0 |
| ANISOU12075 | CA SER D 166  | 5670    | 7050   | 4980   | 120  | 710   | -1420 | C0 |
| ATOM 12076  | C SER D 166   | -29.542 | 24.655 | 37.618 | 1.00 | 48.21 |       | C0 |
| ANISOU12076 | C SER D 166   | 5910    | 7370   | 5040   | 150  | 700   | -1590 | C0 |
| ATOM 12077  | O SER D 166   | -28.491 | 24.215 | 38.121 | 1.00 | 48.11 |       | O0 |
| ANISOU12077 | O SER D 166   | 5870    | 7440   | 4970   | 50   | 650   | -1620 | O0 |
| ATOM 12078  | CB SER D 166  | -30.338 | 22.759 | 36.190 | 1.00 | 45.35 |       | C0 |
| ANISOU12078 | CB SER D 166  | 5390    | 7070   | 4770   | 100  | 710   | -1230 | C0 |
| ATOM 12079  | OG SER D 166  | -31.406 | 22.532 | 37.101 | 1.00 | 46.47 |       | O0 |
| ANISOU12079 | OG SER D 166  | 5450    | 7410   | 4790   | 210  | 770   | -1210 | O0 |
| ATOM 12080  | H SER D 166   | -28.509 | 23.681 | 34.862 | 1.00 | 44.93 |       | H0 |
| ANISOU12080 | H SER D 166   | 5480    | 6680   | 4910   | -70  | 630   | -1330 | H0 |
| ATOM 12081  | HA SER D 166  | -30.682 | 24.762 | 35.891 | 1.00 | 47.07 |       | H0 |
| ANISOU12081 | HA SER D 166  | 5750    | 7060   | 5070   | 220  | 750   | -1420 | H0 |
| ATOM 12082  | HB2 SER D 166 | -30.623 | 22.510 | 35.282 | 1.00 | 44.58 |       | H0 |
| ANISOU12082 | HB2 SER D 166 | 5270    | 6900   | 4760   | 80   | 710   | -1130 | H0 |
| ATOM 12083  | HB3 SER D 166 | -29.571 | 22.194 | 36.436 | 1.00 | 44.99 |       | H0 |
| ANISOU12083 | HB3 SER D 166 | 5320    | 7070   | 4700   | 20   | 670   | -1210 | H0 |
| ATOM 12084  | N GLN D 167   | -30.391 | 25.482 | 38.230 | 1.00 | 50.18 |       | N0 |
| ANISOU12084 | N GLN D 167   | 6190    | 7650   | 5230   | 300  | 770   | -1710 | N0 |
| ATOM 12085  | CA GLN D 167  | -30.287 | 25.910 | 39.649 | 1.00 | 52.44 |       | C0 |
| ANISOU12085 | CA GLN D 167  | 6510    | 8070   | 5340   | 360  | 780   | -1890 | C0 |
| ATOM 12086  | C GLN D 167   | -30.728 | 24.766 | 40.578 | 1.00 | 52.07 |       | C0 |
| ANISOU12086 | C GLN D 167   | 6330    | 8340   | 5120   | 390  | 810   | -1780 | C0 |
| ATOM 12087  | O GLN D 167   | -30.530 | 24.901 | 41.799 | 1.00 | 53.22 |       | O0 |
| ANISOU12087 | O GLN D 167   | 6480    | 8650   | 5090   | 420  | 810   | -1900 | O0 |
| ATOM 12088  | CB GLN D 167  | -31.132 | 27.165 | 39.881 | 1.00 | 55.03 |       | C0 |
| ANISOU12088 | CB GLN D 167  | 6940    | 8300   | 5670   | 530  | 860   | -2050 | C0 |
| ATOM 12089  | CG GLN D 167  | -32.633 | 26.907 | 39.870 | 1.00 | 56.10 |       | C0 |
| ANISOU12089 | CG GLN D 167  | 6970    | 8580   | 5770   | 700  | 960   | -1930 | C0 |
| ATOM 12090  | CD GLN D 167  | -33.447 | 28.174 | 39.970 | 1.00 | 58.94 |       | C0 |
| ANISOU12090 | CD GLN D 167  | 7420    | 8820   | 6150   | 900  | 1040  | -2070 | C0 |
| ATOM 12091  | OE1 GLN D 167 | -34.265 | 28.479 | 39.103 | 1.00 | 60.07 |       | O0 |
| ANISOU12091 | OE1 GLN D 167 | 7550    | 8860   | 6410   | 1010 | 1080  | -1970 | O0 |
| ATOM 12092  | NE2 GLN D 167 | -33.233 | 28.923 | 41.039 | 1.00 | 61.10 |       | N0 |
| ANISOU12092 | NE2 GLN D 167 | 7800    | 9110   | 6300   | 970  | 1060  | -2300 | N0 |
| ATOM 12093  | H GLN D 167   | -31.102 | 25.847 | 37.795 | 1.00 | 50.38 |       | H0 |
| ANISOU12093 | H GLN D 167   | 6230    | 7610   | 5300   | 380  | 810   | -1680 | H0 |
| ATOM 12094  | HA GLN D 167  | -29.344 | 26.123 | 39.839 | 1.00 | 52.63 |       | H0 |

|             |      |           |         |        |        |      |       |       |    |
|-------------|------|-----------|---------|--------|--------|------|-------|-------|----|
| ANISOU12094 | HA   | GLN D 167 | 6580    | 8050   | 5360   | 260  | 730   | -1980 | H0 |
| ATOM 12095  | HB2  | GLN D 167 | -30.880 | 27.554 | 40.744 | 1.00 | 56.41 |       | H0 |
| ANISOU12095 | HB2  | GLN D 167 | 7160    | 8540   | 5740   | 540  | 860   | -2200 | H0 |
| ATOM 12096  | HB3  | GLN D 167 | -30.915 | 27.819 | 39.183 | 1.00 | 55.02 |       | H0 |
| ANISOU12096 | HB3  | GLN D 167 | 7020    | 8090   | 5790   | 510  | 850   | -2080 | H0 |
| ATOM 12097  | HG2  | GLN D 167 | -32.875 | 26.435 | 39.047 | 1.00 | 54.84 |       | H0 |
| ANISOU12097 | HG2  | GLN D 167 | 6750    | 8380   | 5700   | 670  | 940   | -1770 | H0 |
| ATOM 12098  | HG3  | GLN D 167 | -32.861 | 26.327 | 40.624 | 1.00 | 56.39 |       | H0 |
| ANISOU12098 | HG3  | GLN D 167 | 6920    | 8820   | 5680   | 720  | 980   | -1900 | H0 |
| ATOM 12099  | HE21 | GLN D 167 | -33.476 | 29.773 | 41.040 | 1.00 | 62.36 |       | H0 |
| ANISOU12099 | HE21 | GLN D 167 | 8050    | 9140   | 6500   | 1060 | 1100  | -2410 | H0 |
| ATOM 12100  | HE22 | GLN D 167 | -32.847 | 28.574 | 41.755 | 1.00 | 61.28 |       | H0 |
| ANISOU12100 | HE22 | GLN D 167 | 7800    | 9270   | 6210   | 910  | 1040  | -2340 | H0 |
| ATOM 12101  | N    | TYR D 168 | -31.300 | 23.685 | 40.032 | 1.00 | 50.33 |       | N0 |
| ANISOU12101 | N    | TYR D 168 | 5990    | 8190   | 4940   | 370  | 820   | -1550 | N0 |
| ATOM 12102  | CA   | TYR D 168 | -31.896 | 22.566 | 40.812 | 1.00 | 50.50 |       | C0 |
| ANISOU12102 | CA   | TYR D 168 | 5880    | 8480   | 4820   | 400  | 860   | -1400 | C0 |
| ATOM 12103  | C    | TYR D 168 | -30.936 | 21.369 | 40.848 | 1.00 | 49.72 |       | C0 |
| ANISOU12103 | C    | TYR D 168 | 5740    | 8440   | 4710   | 260  | 790   | -1270 | C0 |
| ATOM 12104  | O    | TYR D 168 | -31.214 | 20.417 | 41.592 | 1.00 | 50.90 |       | O0 |
| ANISOU12104 | O    | TYR D 168 | 5810    | 8800   | 4730   | 260  | 820   | -1150 | O0 |
| ATOM 12105  | CB   | TYR D 168 | -33.295 | 22.254 | 40.267 | 1.00 | 49.73 |       | C0 |
| ANISOU12105 | CB   | TYR D 168 | 5690    | 8430   | 4770   | 470  | 940   | -1250 | C0 |
| ATOM 12106  | CG   | TYR D 168 | -34.195 | 23.464 | 40.261 | 1.00 | 50.76 |       | C0 |
| ANISOU12106 | CG   | TYR D 168 | 5860    | 8510   | 4920   | 640  | 1010  | -1380 | C0 |
| ATOM 12107  | CD1  | TYR D 168 | -34.437 | 24.163 | 41.434 | 1.00 | 53.02 |       | C0 |
| ANISOU12107 | CD1  | TYR D 168 | 6170    | 8920   | 5050   | 770  | 1070  | -1550 | C0 |
| ATOM 12108  | CD2  | TYR D 168 | -34.755 | 23.951 | 39.090 | 1.00 | 49.90 |       | C0 |
| ANISOU12108 | CD2  | TYR D 168 | 5760    | 8240   | 4960   | 690  | 1020  | -1340 | C0 |
| ATOM 12109  | CE1  | TYR D 168 | -35.233 | 25.297 | 41.453 | 1.00 | 54.46 |       | C0 |
| ANISOU12109 | CE1  | TYR D 168 | 6400    | 9050   | 5240   | 960  | 1140  | -1670 | C0 |
| ATOM 12110  | CE2  | TYR D 168 | -35.553 | 25.085 | 39.090 | 1.00 | 51.50 |       | C0 |
| ANISOU12110 | CE2  | TYR D 168 | 6000    | 8380   | 5180   | 880  | 1080  | -1440 | C0 |
| ATOM 12111  | CZ   | TYR D 168 | -35.791 | 25.761 | 40.276 | 1.00 | 53.70 |       | C0 |
| ANISOU12111 | CZ   | TYR D 168 | 6320    | 8770   | 5320   | 1010 | 1150  | -1610 | C0 |
| ATOM 12112  | OH   | TYR D 168 | -36.574 | 26.877 | 40.307 | 1.00 | 55.55 |       | O0 |
| ANISOU12112 | OH   | TYR D 168 | 6600    | 8940   | 5570   | 1220 | 1230  | -1720 | O0 |
| ATOM 12113  | H    | TYR D 168 | -31.389 | 23.564 | 39.136 | 1.00 | 49.38 |       | H0 |
| ANISOU12113 | H    | TYR D 168 | 5870    | 7960   | 4940   | 340  | 810   | -1470 | H0 |
| ATOM 12114  | HA   | TYR D 168 | -32.005 | 22.877 | 41.746 | 1.00 | 51.83 |       | H0 |
| ANISOU12114 | HA   | TYR D 168 | 6060    | 8780   | 4860   | 460  | 890   | -1500 | H0 |
| ATOM 12115  | HB2  | TYR D 168 | -33.209 | 21.910 | 39.354 | 1.00 | 48.51 |       | H0 |
| ANISOU12115 | HB2  | TYR D 168 | 5530    | 8170   | 4740   | 400  | 910   | -1160 | H0 |
| ATOM 12116  | HB3  | TYR D 168 | -33.701 | 21.553 | 40.820 | 1.00 | 50.10 |       | H0 |
| ANISOU12116 | HB3  | TYR D 168 | 5650    | 8660   | 4730   | 480  | 970   | -1160 | H0 |
| ATOM 12117  | HD1  | TYR D 168 | -34.056 | 23.856 | 42.241 | 1.00 | 53.39 |       | H0 |
| ANISOU12117 | HD1  | TYR D 168 | 6220    | 9100   | 4970   | 750  | 1060  | -1570 | H0 |
| ATOM 12118  | HD2  | TYR D 168 | -34.594 | 23.501 | 38.277 | 1.00 | 48.74 |       | H0 |
| ANISOU12118 | HD2  | TYR D 168 | 5590    | 8010   | 4910   | 600  | 970   | -1230 | H0 |
| ATOM 12119  | HE1  | TYR D 168 | -35.393 | 25.751 | 42.264 | 1.00 | 55.96 |       | H0 |
| ANISOU12119 | HE1  | TYR D 168 | 6620    | 9320   | 5320   | 1050 | 1190  | -1800 | H0 |
| ATOM 12120  | HE2  | TYR D 168 | -35.934 | 25.397 | 38.286 | 1.00 | 51.35 |       | H0 |
| ANISOU12120 | HE2  | TYR D 168 | 5980    | 8260   | 5270   | 920  | 1080  | -1400 | H0 |
| ATOM 12121  | N    | SER D 169 | -29.837 | 21.419 | 40.091 | 1.00 | 48.68 |       | N0 |

|             |     |           |         |        |        |      |       |       |    |
|-------------|-----|-----------|---------|--------|--------|------|-------|-------|----|
| ANISOU12121 | N   | SER D 169 | 5670    | 8130   | 4700   | 140  | 710   | -1290 | NO |
| ATOM 12122  | CA  | SER D 169 | -28.705 | 20.459 | 40.192 | 1.00 | 48.14 |       | CO |
| ANISOU12122 | CA  | SER D 169 | 5570    | 8110   | 4610   | 40   | 640   | -1210 | CO |
| ATOM 12123  | C   | SER D 169 | -28.137 | 20.483 | 41.617 | 1.00 | 49.74 |       | CO |
| ANISOU12123 | C   | SER D 169 | 5760    | 8530   | 4620   | 60   | 610   | -1300 | CO |
| ATOM 12124  | O   | SER D 169 | -28.161 | 21.559 | 42.238 | 1.00 | 50.21 |       | OO |
| ANISOU12124 | O   | SER D 169 | 5880    | 8600   | 4600   | 100  | 620   | -1500 | OO |
| ATOM 12125  | CB  | SER D 169 | -27.629 | 20.774 | 39.184 | 1.00 | 46.88 |       | CO |
| ANISOU12125 | CB  | SER D 169 | 5460    | 7740   | 4610   | -70  | 580   | -1250 | CO |
| ATOM 12126  | OG  | SER D 169 | -26.517 | 19.900 | 39.340 | 1.00 | 46.54 |       | OO |
| ANISOU12126 | OG  | SER D 169 | 5380    | 7760   | 4540   | -150 | 510   | -1180 | OO |
| ATOM 12127  | H   | SER D 169 | -29.702 | 22.043 | 39.443 | 1.00 | 48.41 |       | HO |
| ANISOU12127 | H   | SER D 169 | 5690    | 7940   | 4760   | 130  | 700   | -1360 | HO |
| ATOM 12128  | HA  | SER D 169 | -29.056 | 19.547 | 40.008 | 1.00 | 47.44 |       | HO |
| ANISOU12128 | HA  | SER D 169 | 5420    | 8070   | 4530   | 20   | 660   | -1050 | HO |
| ATOM 12129  | HB2 | SER D 169 | -27.994 | 20.685 | 38.277 | 1.00 | 46.02 |       | HO |
| ANISOU12129 | HB2 | SER D 169 | 5360    | 7520   | 4610   | -80  | 590   | -1180 | HO |
| ATOM 12130  | HB3 | SER D 169 | -27.333 | 21.705 | 39.305 | 1.00 | 47.65 |       | HO |
| ANISOU12130 | HB3 | SER D 169 | 5620    | 7770   | 4710   | -70  | 560   | -1400 | HO |
| ATOM 12131  | N   | ARG D 170 | -27.626 | 19.341 | 42.090 | 1.00 | 50.08 |       | NO |
| ANISOU12131 | N   | ARG D 170 | 5730    | 8720   | 4580   | 20   | 580   | -1150 | NO |
| ATOM 12132  | CA  | ARG D 170 | -26.922 | 19.202 | 43.394 | 1.00 | 52.45 |       | CO |
| ANISOU12132 | CA  | ARG D 170 | 6010    | 9250   | 4670   | 30   | 530   | -1200 | CO |
| ATOM 12133  | C   | ARG D 170 | -25.565 | 19.909 | 43.331 | 1.00 | 52.90 |       | CO |
| ANISOU12133 | C   | ARG D 170 | 6100    | 9240   | 4760   | -50  | 430   | -1380 | CO |
| ATOM 12134  | O   | ARG D 170 | -24.991 | 20.189 | 44.399 | 1.00 | 54.57 |       | OO |
| ANISOU12134 | O   | ARG D 170 | 6310    | 9630   | 4800   | -50  | 370   | -1490 | OO |
| ATOM 12135  | CB  | ARG D 170 | -26.675 | 17.730 | 43.733 | 1.00 | 52.71 |       | CO |
| ANISOU12135 | CB  | ARG D 170 | 5960    | 9420   | 4640   | 30   | 520   | -970  | CO |
| ATOM 12136  | CG  | ARG D 170 | -27.859 | 17.028 | 44.376 | 1.00 | 54.25 |       | CO |
| ANISOU12136 | CG  | ARG D 170 | 6110    | 9780   | 4720   | 100  | 610   | -810  | CO |
| ATOM 12137  | CD  | ARG D 170 | -27.563 | 15.560 | 44.586 | 1.00 | 54.75 |       | CO |
| ANISOU12137 | CD  | ARG D 170 | 6120    | 9920   | 4760   | 80   | 600   | -560  | CO |
| ATOM 12138  | NE  | ARG D 170 | -27.408 | 14.860 | 43.316 | 1.00 | 53.46 |       | NO |
| ANISOU12138 | NE  | ARG D 170 | 5970    | 9530   | 4810   | 0    | 590   | -430  | NO |
| ATOM 12139  | CZ  | ARG D 170 | -27.153 | 13.561 | 43.194 | 1.00 | 53.78 |       | CO |
| ANISOU12139 | CZ  | ARG D 170 | 6000    | 9550   | 4880   | -20  | 590   | -220  | CO |
| ATOM 12140  | NH1 | ARG D 170 | -27.008 | 12.803 | 44.271 | 1.00 | 55.08 |       | NO |
| ANISOU12140 | NH1 | ARG D 170 | 6130    | 9910   | 4880   | 30   | 600   | -80   | NO |
| ATOM 12141  | NH2 | ARG D 170 | -27.042 | 13.028 | 41.987 | 1.00 | 52.39 |       | NO |
| ANISOU12141 | NH2 | ARG D 170 | 5850    | 9150   | 4900   | -80  | 590   | -140  | NO |
| ATOM 12142  | H   | ARG D 170 | -27.682 | 18.560 | 41.625 | 1.00 | 49.26 |       | HO |
| ANISOU12142 | H   | ARG D 170 | 5600    | 8580   | 4540   | -10  | 580   | -1010 | HO |
| ATOM 12143  | HA  | ARG D 170 | -27.471 | 19.614 | 44.101 | 1.00 | 53.57 |       | HO |
| ANISOU12143 | HA  | ARG D 170 | 6160    | 9500   | 4700   | 100  | 570   | -1280 | HO |
| ATOM 12144  | HB2 | ARG D 170 | -26.433 | 17.257 | 42.911 | 1.00 | 51.58 |       | HO |
| ANISOU12144 | HB2 | ARG D 170 | 5820    | 9140   | 4640   | -20  | 500   | -870  | HO |
| ATOM 12145  | HB3 | ARG D 170 | -25.910 | 17.675 | 44.345 | 1.00 | 53.61 |       | HO |
| ANISOU12145 | HB3 | ARG D 170 | 6060    | 9650   | 4660   | 20   | 460   | -1000 | HO |
| ATOM 12146  | HG2 | ARG D 170 | -28.059 | 17.445 | 45.240 | 1.00 | 55.53 |       | HO |
| ANISOU12146 | HG2 | ARG D 170 | 6270    | 10090  | 4730   | 150  | 630   | -900  | HO |
| ATOM 12147  | HG3 | ARG D 170 | -28.648 | 17.120 | 43.799 | 1.00 | 53.55 |       | HO |
| ANISOU12147 | HG3 | ARG D 170 | 6020    | 9600   | 4730   | 100  | 660   | -780  | HO |
| ATOM 12148  | HD2 | ARG D 170 | -26.739 | 15.467 | 45.111 | 1.00 | 55.38 |       | HO |

|             |                |         |        |        |      |       |       |    |
|-------------|----------------|---------|--------|--------|------|-------|-------|----|
| ANISOU12148 | HD2 ARG D 170  | 6200    | 10100  | 4750   | 80   | 540   | -580  | H0 |
| ATOM 12149  | HD3 ARG D 170  | -28.294 | 15.151 | 45.096 | 1.00 | 55.42 |       | H0 |
| ANISOU12149 | HD3 ARG D 170  | 6180    | 10130  | 4750   | 110  | 660   | -460  | H0 |
| ATOM 12150  | HE ARG D 170   | -27.503 | 15.322 | 42.583 | 1.00 | 52.64 |       | H0 |
| ANISOU12150 | HE ARG D 170   | 5900    | 9290   | 4820   | -20  | 590   | -510  | H0 |
| ATOM 12151  | HH11 ARG D 170 | -27.082 | 13.153 | 45.073 | 1.00 | 56.16 |       | H0 |
| ANISOU12151 | HH11 ARG D 170 | 6250    | 10210  | 4880   | 70   | 600   | -130  | H0 |
| ATOM 12152  | HH12 ARG D 170 | -26.836 | 11.945 | 44.182 | 1.00 | 55.07 |       | H0 |
| ANISOU12152 | HH12 ARG D 170 | 6130    | 9880   | 4910   | 20   | 600   | 70    | H0 |
| ATOM 12153  | HH21 ARG D 170 | -27.138 | 13.533 | 41.272 | 1.00 | 51.49 |       | H0 |
| ANISOU12153 | HH21 ARG D 170 | 5760    | 8920   | 4890   | -110 | 590   | -230  | H0 |
| ATOM 12154  | HH22 ARG D 170 | -26.868 | 12.168 | 41.901 | 1.00 | 52.32 |       | H0 |
| ANISOU12154 | HH22 ARG D 170 | 5840    | 9110   | 4920   | -90  | 590   | -10   | H0 |
| ATOM 12155  | N PHE D 171    | -25.065 | 20.151 | 42.118 | 1.00 | 51.26 |       | N0 |
| ANISOU12155 | N PHE D 171    | 5930    | 8800   | 4750   | -130 | 400   | -1380 | N0 |
| ATOM 12156  | CA PHE D 171   | -23.709 | 20.681 | 41.845 | 1.00 | 51.60 |       | C0 |
| ANISOU12156 | CA PHE D 171   | 5980    | 8770   | 4860   | -240 | 310   | -1510 | C0 |
| ATOM 12157  | C PHE D 171    | -23.829 | 22.120 | 41.335 | 1.00 | 52.46 |       | C0 |
| ANISOU12157 | C PHE D 171    | 6200    | 8660   | 5070   | -280 | 330   | -1710 | C0 |
| ATOM 12158  | O PHE D 171    | -24.922 | 22.519 | 40.882 | 1.00 | 52.67 |       | O0 |
| ANISOU12158 | O PHE D 171    | 6280    | 8560   | 5170   | -210 | 410   | -1710 | O0 |
| ATOM 12159  | CB PHE D 171   | -22.997 | 19.734 | 40.875 | 1.00 | 49.76 |       | C0 |
| ANISOU12159 | CB PHE D 171   | 5690    | 8450   | 4760   | -300 | 280   | -1330 | C0 |
| ATOM 12160  | CG PHE D 171   | -23.092 | 18.284 | 41.281 | 1.00 | 49.31 |       | C0 |
| ANISOU12160 | CG PHE D 171   | 5560    | 8550   | 4630   | -240 | 290   | -1110 | C0 |
| ATOM 12161  | CD1 PHE D 171  | -24.164 | 17.505 | 40.880 | 1.00 | 48.33 |       | C0 |
| ANISOU12161 | CD1 PHE D 171  | 5440    | 8370   | 4550   | -200 | 370   | -940  | C0 |
| ATOM 12162  | CD2 PHE D 171  | -22.133 | 17.709 | 42.100 | 1.00 | 50.63 |       | C0 |
| ANISOU12162 | CD2 PHE D 171  | 5650    | 8910   | 4670   | -240 | 220   | -1070 | C0 |
| ATOM 12163  | CE1 PHE D 171  | -24.266 | 16.179 | 41.270 | 1.00 | 48.67 |       | C0 |
| ANISOU12163 | CE1 PHE D 171  | 5430    | 8530   | 4530   | -160 | 390   | -740  | C0 |
| ATOM 12164  | CE2 PHE D 171  | -22.233 | 16.381 | 42.487 | 1.00 | 50.77 |       | C0 |
| ANISOU12164 | CE2 PHE D 171  | 5620    | 9050   | 4620   | -170 | 230   | -850  | C0 |
| ATOM 12165  | CZ PHE D 171   | -23.299 | 15.618 | 42.071 | 1.00 | 49.84 |       | C0 |
| ANISOU12165 | CZ PHE D 171   | 5530    | 8850   | 4560   | -140 | 320   | -680  | C0 |
| ATOM 12166  | H PHE D 171    | -25.526 | 19.991 | 41.351 | 1.00 | 50.30 |       | H0 |
| ANISOU12166 | H PHE D 171    | 5810    | 8550   | 4740   | -130 | 440   | -1310 | H0 |
| ATOM 12167  | HA PHE D 171   | -23.202 | 20.696 | 42.695 | 1.00 | 52.80 |       | H0 |
| ANISOU12167 | HA PHE D 171   | 6100    | 9080   | 4880   | -250 | 260   | -1570 | H0 |
| ATOM 12168  | HB2 PHE D 171  | -23.390 | 19.844 | 39.985 | 1.00 | 48.73 |       | H0 |
| ANISOU12168 | HB2 PHE D 171  | 5600    | 8160   | 4760   | -310 | 320   | -1300 | H0 |
| ATOM 12169  | HB3 PHE D 171  | -22.053 | 19.991 | 40.823 | 1.00 | 50.12 |       | H0 |
| ANISOU12169 | HB3 PHE D 171  | 5720    | 8490   | 4830   | -370 | 230   | -1400 | H0 |
| ATOM 12170  | HD1 PHE D 171  | -24.832 | 17.883 | 40.331 | 1.00 | 47.84 |       | H0 |
| ANISOU12170 | HD1 PHE D 171  | 5420    | 8200   | 4570   | -190 | 410   | -970  | H0 |
| ATOM 12171  | HD2 PHE D 171  | -21.398 | 18.226 | 42.390 | 1.00 | 51.39 |       | H0 |
| ANISOU12171 | HD2 PHE D 171  | 5730    | 9060   | 4730   | -280 | 160   | -1180 | H0 |
| ATOM 12172  | HE1 PHE D 171  | -24.998 | 15.658 | 40.980 | 1.00 | 48.12 |       | H0 |
| ANISOU12172 | HE1 PHE D 171  | 5370    | 8410   | 4500   | -140 | 440   | -630  | H0 |
| ATOM 12173  | HE2 PHE D 171  | -21.567 | 16.000 | 43.037 | 1.00 | 51.56 |       | H0 |
| ANISOU12173 | HE2 PHE D 171  | 5670    | 9290   | 4640   | -150 | 180   | -810  | H0 |
| ATOM 12174  | HZ PHE D 171   | -23.368 | 14.714 | 42.334 | 1.00 | 49.99 |       | H0 |
| ANISOU12174 | HZ PHE D 171   | 5520    | 8930   | 4550   | -100 | 330   | -530  | H0 |
| ATOM 12175  | N GLU D 172    | -22.737 | 22.878 | 41.452 | 1.00 | 54.13 |       | N0 |



|                            |         |        |        |       |       |       |    |
|----------------------------|---------|--------|--------|-------|-------|-------|----|
| ANISOU12175 N GLU D 172    | 6430    | 8840   | 5300   | -390  | 250   | -1880 | N0 |
| ATOM 12176 CA GLU D 172    | -22.566 | 24.227 | 40.853 | 1.00  | 54.82 |       | C0 |
| ANISOU12176 CA GLU D 172   | 6640    | 8680   | 5520   | -470  | 250   | -2060 | C0 |
| ATOM 12177 C GLU D 172     | -21.276 | 24.231 | 40.035 | 1.00  | 54.07 |       | C0 |
| ANISOU12177 C GLU D 172    | 6500    | 8490   | 5560   | -620  | 190   | -2040 | C0 |
| ATOM 12178 O GLU D 172     | -20.342 | 23.493 | 40.402 | 1.00  | 53.59 |       | O0 |
| ANISOU12178 O GLU D 172    | 6320    | 8610   | 5430   | -670  | 120   | -1980 | O0 |
| ATOM 12179 CB GLU D 172    | -22.527 | 25.311 | 41.929 | 1.00  | 57.35 |       | C0 |
| ANISOU12179 CB GLU D 172   | 7040    | 9050   | 5710   | -470  | 230   | -2320 | C0 |
| ATOM 12180 CG GLU D 172    | -21.324 | 25.227 | 42.849 | 1.00  | 59.09 |       | C0 |
| ANISOU12180 CG GLU D 172   | 7190    | 9480   | 5790   | -580  | 120   | -2430 | C0 |
| ATOM 12181 CD GLU D 172    | -21.346 | 26.241 | 43.975 | 1.00  | 62.24 |       | C0 |
| ANISOU12181 CD GLU D 172   | 7670    | 9950   | 6030   | -590  | 90    | -2710 | C0 |
| ATOM 12182 OE1 GLU D 172   | -22.246 | 27.104 | 43.969 | 1.00  | 63.68 |       | O0 |
| ANISOU12182 OE1 GLU D 172  | 7990    | 9970   | 6230   | -510  | 170   | -2830 | O0 |
| ATOM 12183 OE2 GLU D 172   | -20.474 | 26.159 | 44.860 | 1.00  | 64.30 |       | O0 |
| ANISOU12183 OE2 GLU D 172  | 7870    | 10430  | 6130   | -670  | -10   | -2800 | O0 |
| ATOM 12184 H GLU D 172     | -22.007 | 22.599 | 41.919 | 1.00  | 54.58 |       | H0 |
| ANISOU12184 H GLU D 172    | 6430    | 9030   | 5280   | -430  | 190   | -1890 | H0 |
| ATOM 12185 HA GLU D 172    | -23.325 | 24.403 | 40.250 | 1.00  | 54.03 |       | H0 |
| ANISOU12185 HA GLU D 172   | 6590    | 8440   | 5500   | -410  | 320   | -2010 | H0 |
| ATOM 12186 HB2 GLU D 172   | -22.529 | 26.187 | 41.488 | 1.00  | 57.77 |       | H0 |
| ANISOU12186 HB2 GLU D 172  | 7180    | 8900   | 5860   | -510  | 250   | -2430 | H0 |
| ATOM 12187 HB3 GLU D 172   | -23.343 | 25.244 | 42.467 | 1.00  | 57.78 |       | H0 |
| ANISOU12187 HB3 GLU D 172  | 7110    | 9190   | 5660   | -360  | 280   | -2330 | H0 |
| ATOM 12188 HG2 GLU D 172   | -21.279 | 24.329 | 43.240 | 1.00  | 58.79 |       | H0 |
| ANISOU12188 HG2 GLU D 172  | 7050    | 9630   | 5650   | -530  | 100   | -2300 | H0 |
| ATOM 12189 HG3 GLU D 172   | -20.506 | 25.365 | 42.325 | 1.00  | 58.95 |       | H0 |
| ANISOU12189 HG3 GLU D 172  | 7150    | 9390   | 5870   | -700  | 70    | -2430 | H0 |
| ATOM 12190 N ILE D 173     | -21.243 | 25.039 | 38.974 | 1.00  | 54.37 |       | N0 |
| ANISOU12190 N ILE D 173    | 6630    | 8260   | 5770   | -690  | 220   | -2080 | N0 |
| ATOM 12191 CA ILE D 173    | -20.078 | 25.181 | 38.053 | 1.00  | 54.46 |       | C0 |
| ANISOU12191 CA ILE D 173   | 6610    | 8160   | 5930   | -850  | 190   | -2060 | C0 |
| ATOM 12192 C ILE D 173     | -19.186 | 26.317 | 38.559 | 1.00  | 56.40 |       | C0 |
| ANISOU12192 C ILE D 173    | 6900    | 8370   | 6160   | -1000 | 120   | -2290 | C0 |
| ATOM 12193 O ILE D 173     | -19.699 | 27.438 | 38.719 | 1.00  | 57.72 |       | O0 |
| ANISOU12193 O ILE D 173    | 7210    | 8370   | 6350   | -1000 | 160   | -2450 | O0 |
| ATOM 12194 CB ILE D 173    | -20.553 | 25.420 | 36.609 | 1.00  | 53.50 |       | C0 |
| ANISOU12194 CB ILE D 173   | 6560    | 7780   | 5990   | -840  | 260   | -1950 | C0 |
| ATOM 12195 CG1 ILE D 173   | -21.253 | 24.179 | 36.051 | 1.00  | 51.97 |       | C0 |
| ANISOU12195 CG1 ILE D 173  | 6310    | 7630   | 5800   | -730  | 310   | -1730 | C0 |
| ATOM 12196 CG2 ILE D 173   | -19.395 | 25.874 | 35.728 | 1.00  | 54.09 |       | C0 |
| ANISOU12196 CG2 ILE D 173  | 6630    | 7720   | 6200   | -1010 | 240   | -1970 | C0 |
| ATOM 12197 CD1 ILE D 173   | -21.663 | 24.299 | 34.600 | 1.00  | 51.02 |       | C0 |
| ANISOU12197 CD1 ILE D 173  | 6250    | 7300   | 5840   | -730  | 370   | -1620 | C0 |
| ATOM 12198 H ILE D 173     | -21.947 | 25.571 | 38.747 | 1.00  | 54.37 |       | H0 |
| ANISOU12198 H ILE D 173    | 6710    | 8130   | 5810   | -640  | 280   | -2110 | H0 |
| ATOM 12199 HA ILE D 173    | -19.567 | 24.352 | 38.072 | 1.00  | 53.86 |       | H0 |
| ANISOU12199 HA ILE D 173   | 6430    | 8210   | 5820   | -860  | 160   | -1960 | H0 |
| ATOM 12200 HB ILE D 173    | -21.218 | 26.152 | 36.631 | 1.00  | 54.11 |       | H0 |
| ANISOU12200 HB ILE D 173   | 6740    | 7740   | 6080   | -800  | 300   | -2030 | H0 |
| ATOM 12201 HG12 ILE D 173  | -20.651 | 23.410 | 36.144 | 1.00  | 51.57 |       | H0 |
| ANISOU12201 HG12 ILE D 173 | 6170    | 7700   | 5720   | -750  | 270   | -1660 | H0 |
| ATOM 12202 HG13 ILE D 173  | -22.053 | 24.001 | 36.589 | 1.00  | 51.99 |       | H0 |

|                            |         |        |        |       |       |       |    |
|----------------------------|---------|--------|--------|-------|-------|-------|----|
| ANISOU12202 HG13 ILE D 173 | 6320    | 7710   | 5730   | -630  | 330   | -1730 | H0 |
| ATOM 12203 HG21 ILE D 173  | -19.048 | 26.722 | 36.052 | 1.00  | 55.37 |       | H0 |
| ANISOU12203 HG21 ILE D 173 | 6840    | 7830   | 6370   | -1100 | 220   | -2110 | H0 |
| ATOM 12204 HG22 ILE D 173  | -19.703 | 25.985 | 34.812 | 1.00  | 53.16 |       | H0 |
| ANISOU12204 HG22 ILE D 173 | 6560    | 7460   | 6180   | -1000 | 290   | -1890 | H0 |
| ATOM 12205 HG23 ILE D 173  | -18.687 | 25.206 | 35.751 | 1.00  | 53.66 |       | H0 |
| ANISOU12205 HG23 ILE D 173 | 6470    | 7800   | 6130   | -1050 | 210   | -1900 | H0 |
| ATOM 12206 HD11 ILE D 173  | -22.041 | 25.181 | 34.440 | 1.00  | 51.51 |       | H0 |
| ANISOU12206 HD11 ILE D 173 | 6400    | 7230   | 5940   | -720  | 390   | -1700 | H0 |
| ATOM 12207 HD12 ILE D 173  | -22.327 | 23.620 | 34.393 | 1.00  | 49.95 |       | H0 |
| ANISOU12207 HD12 ILE D 173 | 6090    | 7200   | 5690   | -650  | 390   | -1510 | H0 |
| ATOM 12208 HD13 ILE D 173  | -20.885 | 24.172 | 34.030 | 1.00  | 50.62 |       | H0 |
| ANISOU12208 HD13 ILE D 173 | 6170    | 7220   | 5850   | -810  | 350   | -1590 | H0 |
| ATOM 12209 N LEU D 174     | -17.902 | 26.028 | 38.782 | 1.00  | 57.22 |       | N0 |
| ANISOU12209 N LEU D 174    | 6870    | 8630   | 6240   | -1130 | 40    | -2300 | N0 |
| ATOM 12210 CA LEU D 174    | -16.876 | 27.016 | 39.211 | 1.00  | 60.45 |       | C0 |
| ANISOU12210 CA LEU D 174   | 7290    | 9040   | 6640   | -1320 | -40   | -2520 | C0 |
| ATOM 12211 C LEU D 174     | -16.213 | 27.643 | 37.978 | 1.00  | 60.89 |       | C0 |
| ANISOU12211 C LEU D 174    | 7370    | 8860   | 6910   | -1490 | -20   | -2500 | C0 |
| ATOM 12212 O LEU D 174     | -15.994 | 28.867 | 37.989 | 1.00  | 62.81 |       | O0 |
| ANISOU12212 O LEU D 174    | 7730    | 8920   | 7220   | -1630 | -20   | -2680 | O0 |
| ATOM 12213 CB LEU D 174    | -15.851 | 26.313 | 40.108 | 1.00  | 61.42 |       | C0 |
| ANISOU12213 CB LEU D 174   | 7230    | 9500   | 6610   | -1370 | -160  | -2520 | C0 |
| ATOM 12214 CG LEU D 174    | -16.419 | 25.670 | 41.373 | 1.00  | 61.92 |       | C0 |
| ANISOU12214 CG LEU D 174   | 7260    | 9820   | 6450   | -1220 | -190  | -2520 | C0 |
| ATOM 12215 CD1 LEU D 174   | -15.300 | 25.105 | 42.236 | 1.00  | 63.82 |       | C0 |
| ANISOU12215 CD1 LEU D 174  | 7320    | 10400  | 6530   | -1270 | -310  | -2520 | C0 |
| ATOM 12216 CD2 LEU D 174   | -17.251 | 26.667 | 42.168 | 1.00  | 63.20 |       | C0 |
| ANISOU12216 CD2 LEU D 174  | 7580    | 9920   | 6510   | -1180 | -160  | -2740 | C0 |
| ATOM 12217 H LEU D 174     | -17.570 | 25.186 | 38.677 | 1.00  | 56.61 |       | H0 |
| ANISOU12217 H LEU D 174    | 6690    | 8670   | 6140   | -1110 | 20    | -2180 | H0 |
| ATOM 12218 HA LEU D 174    | -17.325 | 27.728 | 39.722 | 1.00  | 61.52 |       | H0 |
| ANISOU12218 HA LEU D 174   | 7530    | 9110   | 6730   | -1310 | -40   | -2670 | H0 |
| ATOM 12219 HB2 LEU D 174   | -15.404 | 25.621 | 39.581 | 1.00  | 60.40 |       | H0 |
| ANISOU12219 HB2 LEU D 174  | 7000    | 9420   | 6540   | -1370 | -160  | -2370 | H0 |
| ATOM 12220 HB3 LEU D 174   | -15.173 | 26.968 | 40.371 | 1.00  | 63.07 |       | H0 |
| ANISOU12220 HB3 LEU D 174  | 7430    | 9720   | 6820   | -1510 | -220  | -2670 | H0 |
| ATOM 12221 HG LEU D 174    | -17.007 | 24.923 | 41.102 | 1.00  | 60.40 |       | H0 |
| ANISOU12221 HG LEU D 174   | 7050    | 9630   | 6260   | -1090 | -130  | -2350 | H0 |
| ATOM 12222 HD11 LEU D 174  | -14.790 | 24.455 | 41.722 | 1.00  | 62.76 |       | H0 |
| ANISOU12222 HD11 LEU D 174 | 7080    | 10300  | 6460   | -1270 | -320  | -2370 | H0 |
| ATOM 12223 HD12 LEU D 174  | -15.680 | 24.671 | 43.019 | 1.00  | 63.95 |       | H0 |
| ANISOU12223 HD12 LEU D 174 | 7320    | 10580  | 6400   | -1170 | -330  | -2500 | H0 |
| ATOM 12224 HD13 LEU D 174  | -14.712 | 25.826 | 42.519 | 1.00  | 65.31 |       | H0 |
| ANISOU12224 HD13 LEU D 174 | 7510    | 10600  | 6710   | -1410 | -380  | -2680 | H0 |
| ATOM 12225 HD21 LEU D 174  | -16.798 | 27.529 | 42.185 | 1.00  | 64.67 |       | H0 |
| ANISOU12225 HD21 LEU D 174 | 7820    | 10010  | 6740   | -1310 | -200  | -2900 | H0 |
| ATOM 12226 HD22 LEU D 174  | -17.365 | 26.344 | 43.079 | 1.00  | 64.05 |       | H0 |
| ANISOU12226 HD22 LEU D 174 | 7650    | 10230  | 6450   | -1120 | -200  | -2770 | H0 |
| ATOM 12227 HD23 LEU D 174  | -18.124 | 26.769 | 41.751 | 1.00  | 62.29 |       | H0 |
| ANISOU12227 HD23 LEU D 174 | 7560    | 9650   | 6460   | -1090 | -80   | -2690 | H0 |
| ATOM 12228 N ASP D 175     | -15.904 | 26.840 | 36.957 | 1.00  | 59.95 |       | N0 |
| ANISOU12228 N ASP D 175    | 7160    | 8730   | 6890   | -1470 | 20    | -2290 | N0 |
| ATOM 12229 CA ASP D 175    | -15.307 | 27.321 | 35.682 | 1.00  | 60.67 |       | C0 |

|             |      |           |         |        |        |       |       |       |    |
|-------------|------|-----------|---------|--------|--------|-------|-------|-------|----|
| ANISOU12229 | CA   | ASP D 175 | 7270    | 8620   | 7160   | -1610 | 60    | -2240 | C0 |
| ATOM 12230  | C    | ASP D 175 | -15.407 | 26.218 | 34.622 | 1.00  | 58.65 |       | C0 |
| ANISOU12230 | C    | ASP D 175 | 6940    | 8370   | 6970   | -1520 | 120   | -2000 | C0 |
| ATOM 12231  | O    | ASP D 175 | -15.331 | 25.026 | 34.987 | 1.00  | 56.57 |       | O0 |
| ANISOU12231 | O    | ASP D 175 | 6560    | 8320   | 6610   | -1410 | 90    | -1890 | O0 |
| ATOM 12232  | CB   | ASP D 175 | -13.857 | 27.776 | 35.887 | 1.00  | 63.33 |       | C0 |
| ANISOU12232 | CB   | ASP D 175 | 7490    | 9050   | 7520   | -1850 | -20   | -2350 | C0 |
| ATOM 12233  | CG   | ASP D 175 | -13.286 | 28.650 | 34.776 | 1.00  | 64.54 |       | C0 |
| ANISOU12233 | CG   | ASP D 175 | 7700    | 8970   | 7860   | -2030 | 30    | -2350 | C0 |
| ATOM 12234  | OD1  | ASP D 175 | -13.997 | 28.901 | 33.775 | 1.00  | 64.30 |       | O0 |
| ANISOU12234 | OD1  | ASP D 175 | 7800    | 8700   | 7940   | -1970 | 130   | -2250 | O0 |
| ATOM 12235  | OD2  | ASP D 175 | -12.125 | 29.074 | 34.918 | 1.00  | 66.29 |       | O0 |
| ANISOU12235 | OD2  | ASP D 175 | 7820    | 9270   | 8100   | -2240 | -30   | -2440 | O0 |
| ATOM 12236  | H    | ASP D 175 | -16.034 | 25.938 | 36.985 | 1.00  | 58.87 |       | H0 |
| ANISOU12236 | H    | ASP D 175 | 6950    | 8720   | 6700   | -1380 | 20    | -2170 | H0 |
| ATOM 12237  | HA   | ASP D 175 | -15.832 | 28.097 | 35.375 | 1.00  | 60.96 |       | H0 |
| ANISOU12237 | HA   | ASP D 175 | 7440    | 8450   | 7270   | -1620 | 110   | -2300 | H0 |
| ATOM 12238  | HB2  | ASP D 175 | -13.795 | 28.278 | 36.724 | 1.00  | 64.80 |       | H0 |
| ANISOU12238 | HB2  | ASP D 175 | 7710    | 9280   | 7630   | -1900 | -70   | -2510 | H0 |
| ATOM 12239  | HB3  | ASP D 175 | -13.288 | 26.983 | 35.968 | 1.00  | 62.94 |       | H0 |
| ANISOU12239 | HB3  | ASP D 175 | 7290    | 9200   | 7420   | -1830 | -50   | -2260 | H0 |
| ATOM 12240  | N    | VAL D 176 | -15.599 | 26.627 | 33.365 | 1.00  | 58.73 |       | N0 |
| ANISOU12240 | N    | VAL D 176 | 7040    | 8150   | 7130   | -1550 | 200   | -1920 | N0 |
| ATOM 12241  | CA   | VAL D 176 | -15.494 | 25.772 | 32.148 | 1.00  | 57.89 |       | C0 |
| ANISOU12241 | CA   | VAL D 176 | 6880    | 8030   | 7090   | -1500 | 260   | -1720 | C0 |
| ATOM 12242  | C    | VAL D 176 | -14.438 | 26.404 | 31.233 | 1.00  | 59.57 |       | C0 |
| ANISOU12242 | C    | VAL D 176 | 7060    | 8140   | 7430   | -1690 | 290   | -1720 | C0 |
| ATOM 12243  | O    | VAL D 176 | -14.677 | 27.534 | 30.766 | 1.00  | 62.02 |       | O0 |
| ANISOU12243 | O    | VAL D 176 | 7510    | 8220   | 7830   | -1780 | 330   | -1770 | O0 |
| ATOM 12244  | CB   | VAL D 176 | -16.853 | 25.635 | 31.434 | 1.00  | 56.92 |       | C0 |
| ANISOU12244 | CB   | VAL D 176 | 6880    | 7740   | 7000   | -1350 | 340   | -1620 | C0 |
| ATOM 12245  | CG1  | VAL D 176 | -16.752 | 24.759 | 30.193 | 1.00  | 55.61 |       | C0 |
| ANISOU12245 | CG1  | VAL D 176 | 6670    | 7570   | 6890   | -1320 | 390   | -1440 | C0 |
| ATOM 12246  | CG2  | VAL D 176 | -17.937 | 25.112 | 32.367 | 1.00  | 56.08 |       | C0 |
| ANISOU12246 | CG2  | VAL D 176 | 6790    | 7740   | 6780   | -1190 | 320   | -1630 | C0 |
| ATOM 12247  | H    | VAL D 176 | -15.816 | 27.490 | 33.169 | 1.00  | 59.44 |       | H0 |
| ANISOU12247 | H    | VAL D 176 | 7240    | 8070   | 7280   | -1600 | 220   | -1990 | H0 |
| ATOM 12248  | HA   | VAL D 176 | -15.190 | 24.889 | 32.413 | 1.00  | 57.47 |       | H0 |
| ANISOU12248 | HA   | VAL D 176 | 6710    | 8140   | 6980   | -1450 | 230   | -1660 | H0 |
| ATOM 12249  | HB   | VAL D 176 | -17.124 | 26.540 | 31.140 | 1.00  | 57.41 |       | H0 |
| ANISOU12249 | HB   | VAL D 176 | 7050    | 7630   | 7130   | -1390 | 360   | -1670 | H0 |
| ATOM 12250  | HG11 | VAL D 176 | -16.301 | 25.249 | 29.484 | 1.00  | 55.94 |       | H0 |
| ANISOU12250 | HG11 | VAL D 176 | 6730    | 7510   | 7010   | -1410 | 420   | -1430 | H0 |
| ATOM 12251  | HG12 | VAL D 176 | -17.645 | 24.511 | 29.896 | 1.00  | 54.59 |       | H0 |
| ANISOU12251 | HG12 | VAL D 176 | 6600    | 7380   | 6760   | -1220 | 420   | -1380 | H0 |
| ATOM 12252  | HG13 | VAL D 176 | -16.247 | 23.955 | 30.404 | 1.00  | 55.26 |       | H0 |
| ANISOU12252 | HG13 | VAL D 176 | 6520    | 7670   | 6800   | -1300 | 370   | -1390 | H0 |
| ATOM 12253  | HG21 | VAL D 176 | -17.655 | 24.263 | 32.749 | 1.00  | 55.78 |       | H0 |
| ANISOU12253 | HG21 | VAL D 176 | 6660    | 7860   | 6670   | -1150 | 290   | -1580 | H0 |
| ATOM 12254  | HG22 | VAL D 176 | -18.762 | 24.984 | 31.868 | 1.00  | 55.24 |       | H0 |
| ANISOU12254 | HG22 | VAL D 176 | 6750    | 7550   | 6690   | -1100 | 370   | -1550 | H0 |
| ATOM 12255  | HG23 | VAL D 176 | -18.089 | 25.755 | 33.082 | 1.00  | 57.21 |       | H0 |
| ANISOU12255 | HG23 | VAL D 176 | 6980    | 7870   | 6880   | -1200 | 300   | -1750 | H0 |
| ATOM 12256  | N    | THR D 177 | -13.304 | 25.724 | 31.025 | 1.00  | 59.26 |       | N0 |

|             |      |           |         |        |        |       |       |       |    |
|-------------|------|-----------|---------|--------|--------|-------|-------|-------|----|
| ANISOU12256 | N    | THR D 177 | 6840    | 8280   | 7390   | -1750 | 270   | -1650 | N0 |
| ATOM 12257  | CA   | THR D 177 | -12.233 | 26.122 | 30.071 | 1.00  | 60.21 |       | C0 |
| ANISOU12257 | CA   | THR D 177 | 6900    | 8360   | 7620   | -1920 | 310   | -1610 | C0 |
| ATOM 12258  | C    | THR D 177 | -12.150 | 25.081 | 28.948 | 1.00  | 58.29 |       | C0 |
| ANISOU12258 | C    | THR D 177 | 6600    | 8150   | 7400   | -1810 | 380   | -1420 | C0 |
| ATOM 12259  | O    | THR D 177 | -12.282 | 23.876 | 29.236 | 1.00  | 56.54 |       | O0 |
| ANISOU12259 | O    | THR D 177 | 6300    | 8090   | 7100   | -1660 | 370   | -1350 | O0 |
| ATOM 12260  | CB   | THR D 177 | -10.881 | 26.301 | 30.773 | 1.00  | 62.65 |       | C0 |
| ANISOU12260 | CB   | THR D 177 | 7020    | 8880   | 7900   | -2090 | 230   | -1710 | C0 |
| ATOM 12261  | OG1  | THR D 177 | -10.632 | 25.136 | 31.561 | 1.00  | 63.04 |       | O0 |
| ANISOU12261 | OG1  | THR D 177 | 6920    | 9210   | 7830   | -1950 | 160   | -1670 | O0 |
| ATOM 12262  | CG2  | THR D 177 | -10.824 | 27.534 | 31.648 | 1.00  | 64.47 |       | C0 |
| ANISOU12262 | CG2  | THR D 177 | 7330    | 9040   | 8130   | -2250 | 160   | -1920 | C0 |
| ATOM 12263  | H    | THR D 177 | -13.104 | 24.953 | 31.466 | 1.00  | 59.07 |       | H0 |
| ANISOU12263 | H    | THR D 177 | 6720    | 8430   | 7290   | -1680 | 230   | -1620 | H0 |
| ATOM 12264  | HA   | THR D 177 | -12.489 | 26.986 | 29.673 | 1.00  | 60.70 |       | H0 |
| ANISOU12264 | HA   | THR D 177 | 7080    | 8240   | 7750   | -1990 | 350   | -1640 | H0 |
| ATOM 12265  | HB   | THR D 177 | -10.180 | 26.372 | 30.081 | 1.00  | 63.12 |       | H0 |
| ANISOU12265 | HB   | THR D 177 | 7010    | 8940   | 8030   | -2180 | 260   | -1650 | H0 |
| ATOM 12266  | HG21 | THR D 177 | -10.986 | 28.327 | 31.105 | 1.00  | 64.99 |       | H0 |
| ANISOU12266 | HG21 | THR D 177 | 7510    | 8900   | 8290   | -2340 | 210   | -1930 | H0 |
| ATOM 12267  | HG22 | THR D 177 | -9.945  | 27.600 | 32.062 | 1.00  | 65.92 |       | H0 |
| ANISOU12267 | HG22 | THR D 177 | 7380    | 9370   | 8290   | -2370 | 100   | -1980 | H0 |
| ATOM 12268  | HG23 | THR D 177 | -11.505 | 27.473 | 32.342 | 1.00  | 64.23 |       | H0 |
| ANISOU12268 | HG23 | THR D 177 | 7370    | 9010   | 8020   | -2150 | 130   | -1980 | H0 |
| ATOM 12269  | N    | GLN D 178 | -11.949 | 25.542 | 27.714 | 1.00  | 58.81 |       | N0 |
| ANISOU12269 | N    | GLN D 178 | 6710    | 8070   | 7560   | -1900 | 470   | -1350 | N0 |
| ATOM 12270  | CA   | GLN D 178 | -11.864 | 24.690 | 26.501 | 1.00  | 58.90 |       | C0 |
| ANISOU12270 | CA   | GLN D 178 | 6690    | 8090   | 7590   | -1810 | 550   | -1190 | C0 |
| ATOM 12271  | C    | GLN D 178 | -10.467 | 24.822 | 25.885 | 1.00  | 60.42 |       | C0 |
| ANISOU12271 | C    | GLN D 178 | 6730    | 8380   | 7840   | -1960 | 600   | -1150 | C0 |
| ATOM 12272  | O    | GLN D 178 | -10.051 | 25.961 | 25.602 | 1.00  | 63.12 |       | O0 |
| ANISOU12272 | O    | GLN D 178 | 7110    | 8610   | 8260   | -2150 | 620   | -1190 | O0 |
| ATOM 12273  | CB   | GLN D 178 | -12.961 | 25.091 | 25.518 | 1.00  | 58.46 |       | C0 |
| ANISOU12273 | CB   | GLN D 178 | 6830    | 7800   | 7580   | -1760 | 620   | -1120 | C0 |
| ATOM 12274  | CG   | GLN D 178 | -14.359 | 24.881 | 26.075 | 1.00  | 57.97 |       | C0 |
| ANISOU12274 | CG   | GLN D 178 | 6890    | 7680   | 7460   | -1600 | 590   | -1140 | C0 |
| ATOM 12275  | CD   | GLN D 178 | -15.392 | 24.824 | 24.980 | 1.00  | 57.82 |       | C0 |
| ANISOU12275 | CD   | GLN D 178 | 7000    | 7510   | 7460   | -1510 | 650   | -1030 | C0 |
| ATOM 12276  | OE1  | GLN D 178 | -16.264 | 23.955 | 24.965 | 1.00  | 56.95 |       | O0 |
| ANISOU12276 | OE1  | GLN D 178 | 6910    | 7440   | 7290   | -1360 | 650   | -980  | O0 |
| ATOM 12277  | NE2  | GLN D 178 | -15.282 | 25.746 | 24.037 | 1.00  | 58.69 |       | N0 |
| ANISOU12277 | NE2  | GLN D 178 | 7200    | 7460   | 7640   | -1600 | 710   | -990  | N0 |
| ATOM 12278  | H    | GLN D 178 | -11.847 | 26.430 | 27.537 | 1.00  | 59.97 |       | H0 |
| ANISOU12278 | H    | GLN D 178 | 6920    | 8090   | 7770   | -2010 | 480   | -1400 | H0 |
| ATOM 12279  | HA   | GLN D 178 | -12.005 | 23.753 | 26.766 | 1.00  | 57.87 |       | H0 |
| ANISOU12279 | HA   | GLN D 178 | 6510    | 8070   | 7400   | -1690 | 540   | -1150 | H0 |
| ATOM 12280  | HB2  | GLN D 178 | -12.844 | 26.035 | 25.284 | 1.00  | 59.50 |       | H0 |
| ANISOU12280 | HB2  | GLN D 178 | 7030    | 7810   | 7770   | -1870 | 640   | -1150 | H0 |
| ATOM 12281  | HB3  | GLN D 178 | -12.856 | 24.561 | 24.701 | 1.00  | 57.89 |       | H0 |
| ANISOU12281 | HB3  | GLN D 178 | 6740    | 7750   | 7510   | -1720 | 680   | -1020 | H0 |
| ATOM 12282  | HG2  | GLN D 178 | -14.384 | 24.044 | 26.586 | 1.00  | 57.41 |       | H0 |
| ANISOU12282 | HG2  | GLN D 178 | 6750    | 7740   | 7330   | -1520 | 560   | -1130 | H0 |
| ATOM 12283  | HG3  | GLN D 178 | -14.578 | 25.616 | 26.687 | 1.00  | 58.76 |       | H0 |

|             |       |      |     |     |      |         |        |        |      |       |    |
|-------------|-------|------|-----|-----|------|---------|--------|--------|------|-------|----|
| ANISOU12283 | HG3   | GLN  | D   | 178 | 7050 | 7710    | 7570   | -1640  | 560  | -1230 | H0 |
| ATOM        | 12284 | HE21 | GLN | D   | 178  | -15.395 | 25.527 | 23.188 | 1.00 | 58.23 | H0 |
| ANISOU12284 | HE21  | GLN  | D   | 178 | 7170 | 7370    | 7580   | -1580  | 760  | -910  | H0 |
| ATOM        | 12285 | HE22 | GLN | D   | 178  | -15.095 | 26.582 | 24.256 | 1.00 | 59.70 | H0 |
| ANISOU12285 | HE22  | GLN  | D   | 178 | 7370 | 7500    | 7810   | -1690  | 710  | -1050 | H0 |
| ATOM        | 12286 | N    | LYS | D   | 179  | -9.771  | 23.697 | 25.704 | 1.00 | 59.93 | N0 |
| ANISOU12286 | N     | LYS  | D   | 179 | 6510 | 8520    | 7740   | -1870  | 610  | -1070 | N0 |
| ATOM        | 12287 | CA   | LYS | D   | 179  | -8.420  | 23.638 | 25.090 | 1.00 | 61.33 | C0 |
| ANISOU12287 | CA    | LYS  | D   | 179 | 6500 | 8840    | 7960   | -1980  | 670  | -1020 | C0 |
| ATOM        | 12288 | C    | LYS | D   | 179  | -8.475  | 22.800 | 23.805 | 1.00 | 58.84 | C0 |
| ANISOU12288 | C     | LYS  | D   | 179 | 6200 | 8510    | 7640   | -1850  | 780  | -890  | C0 |
| ATOM        | 12289 | O    | LYS | D   | 179  | -9.106  | 21.729 | 23.809 | 1.00 | 54.80 | O0 |
| ANISOU12289 | O     | LYS  | D   | 179 | 5740 | 8010    | 7070   | -1660  | 780  | -840  | O0 |
| ATOM        | 12290 | CB   | LYS | D   | 179  | -7.406  | 23.044 | 26.070 | 1.00 | 63.96 | C0 |
| ANISOU12290 | CB    | LYS  | D   | 179 | 6600 | 9460    | 8240   | -1970  | 580  | -1060 | C0 |
| ATOM        | 12291 | CG   | LYS | D   | 179  | -5.955  | 23.170 | 25.625 | 1.00 | 67.79 | C0 |
| ANISOU12291 | CG    | LYS  | D   | 179 | 6860 | 10130   | 8770   | -2100  | 620  | -1030 | C0 |
| ATOM        | 12292 | CD   | LYS | D   | 179  | -5.045  | 22.090 | 26.169 | 1.00 | 69.67 | C0 |
| ANISOU12292 | CD    | LYS  | D   | 179 | 6850 | 10670   | 8950   | -1970  | 580  | -990  | C0 |
| ATOM        | 12293 | CE   | LYS | D   | 179  | -4.787  | 22.220 | 27.654 | 1.00 | 71.56 | C0 |
| ANISOU12293 | CE    | LYS  | D   | 179 | 6980 | 11090   | 9120   | -2010  | 430  | -1100 | C0 |
| ATOM        | 12294 | NZ   | LYS | D   | 179  | -3.437  | 21.719 | 28.007 | 1.00 | 73.87 | N0 |
| ANISOU12294 | NZ    | LYS  | D   | 179 | 6970 | 11710   | 9390   | -2010  | 390  | -1070 | N0 |
| ATOM        | 12295 | H    | LYS | D   | 179  | -10.091 | 22.880 | 25.951 | 1.00 | 59.03 | H0 |
| ANISOU12295 | H     | LYS  | D   | 179 | 6380 | 8470    | 7580   | -1740  | 590  | -1040 | H0 |
| ATOM        | 12296 | HA   | LYS | D   | 179  | -8.140  | 24.553 | 24.859 | 1.00 | 62.41 | H0 |
| ANISOU12296 | HA    | LYS  | D   | 179 | 6660 | 8900    | 8150   | -2140  | 680  | -1050 | H0 |
| ATOM        | 12297 | HB2  | LYS | D   | 179  | -7.509  | 23.493 | 26.935 | 1.00 | 64.57 | H0 |
| ANISOU12297 | HB2   | LYS  | D   | 179 | 6680 | 9550    | 8300   | -2030  | 500  | -1150 | H0 |
| ATOM        | 12298 | HB3  | LYS | D   | 179  | -7.614  | 22.095 | 26.197 | 1.00 | 63.09 | H0 |
| ANISOU12298 | HB3   | LYS  | D   | 179 | 6470 | 9420    | 8080   | -1800  | 580  | -1010 | H0 |
| ATOM        | 12299 | HG2  | LYS | D   | 179  | -5.921  | 23.146 | 24.646 | 1.00 | 67.34 | H0 |
| ANISOU12299 | HG2   | LYS  | D   | 179 | 6830 | 10000   | 8750   | -2100  | 720  | -950  | H0 |
| ATOM        | 12300 | HG3  | LYS | D   | 179  | -5.615  | 24.044 | 25.912 | 1.00 | 68.93 | H0 |
| ANISOU12300 | HG3   | LYS  | D   | 179 | 6980 | 10260   | 8950   | -2280  | 590  | -1100 | H0 |
| ATOM        | 12301 | HD2  | LYS | D   | 179  | -5.448  | 21.214 | 25.993 | 1.00 | 68.30 | H0 |
| ANISOU12301 | HD2   | LYS  | D   | 179 | 6720 | 10490   | 8740   | -1790  | 610  | -920  | H0 |
| ATOM        | 12302 | HD3  | LYS | D   | 179  | -4.187  | 22.128 | 25.694 | 1.00 | 70.74 | H0 |
| ANISOU12302 | HD3   | LYS  | D   | 179 | 6840 | 10920   | 9110   | -2040  | 630  | -950  | H0 |
| ATOM        | 12303 | HE2  | LYS | D   | 179  | -4.860  | 23.156 | 27.921 | 1.00 | 72.19 | H0 |
| ANISOU12303 | HE2   | LYS  | D   | 179 | 7110 | 11090   | 9230   | -2180  | 390  | -1190 | H0 |
| ATOM        | 12304 | HE3  | LYS | D   | 179  | -5.456  | 21.710 | 28.149 | 1.00 | 70.32 | H0 |
| ANISOU12304 | HE3   | LYS  | D   | 179 | 6910 | 10910   | 8910   | -1870  | 390  | -1100 | H0 |
| ATOM        | 12305 | HZ1  | LYS | D   | 179  | -3.327  | 20.879 | 27.685 | 1.00 | 73.22 | H0 |
| ANISOU12305 | HZ1   | LYS  | D   | 179 | 6840 | 11690   | 9290   | -1850  | 440  | -980  | H0 |
| ATOM        | 12306 | HZ2  | LYS | D   | 179  | -3.339  | 21.708 | 28.908 | 1.00 | 74.34 | H0 |
| ANISOU12306 | HZ2   | LYS  | D   | 179 | 6970 | 11890   | 9390   | -2010  | 290  | -1120 | H0 |
| ATOM        | 12307 | HZ3  | LYS | D   | 179  | -2.805  | 22.261 | 27.646 | 1.00 | 75.00 | H0 |
| ANISOU12307 | HZ3   | LYS  | D   | 179 | 7020 | 11890   | 9580   | -2160  | 420  | -1080 | H0 |
| ATOM        | 12308 | N    | LYS | D   | 180  | -7.823  | 23.286 | 22.750 | 1.00 | 58.75 | N0 |
| ANISOU12308 | N     | LYS  | D   | 180 | 6160 | 8480    | 7680   | -1980  | 880  | -830  | N0 |
| ATOM        | 12309 | CA   | LYS | D   | 180  | -7.587  | 22.539 | 21.493 | 1.00 | 57.77 | C0 |
| ANISOU12309 | CA    | LYS  | D   | 180 | 6020 | 8390    | 7540   | -1880  | 990  | -710  | C0 |
| ATOM        | 12310 | C    | LYS | D   | 180  | -6.273  | 21.770 | 21.628 | 1.00 | 57.96 | C0 |

|             |     |           |        |        |        |       |       |      |    |
|-------------|-----|-----------|--------|--------|--------|-------|-------|------|----|
| ANISOU12310 | C   | LYS D 180 | 5780   | 8690   | 7550   | -1840 | 1010  | -690 | C0 |
| ATOM 12311  | O   | LYS D 180 | -5.282 | 22.379 | 22.059 | 1.00  | 59.26 |      | O0 |
| ANISOU12311 | O   | LYS D 180 | 5780   | 8990   | 7750   | -2010 | 990   | -720 | O0 |
| ATOM 12312  | CB  | LYS D 180 | -7.508 | 23.500 | 20.306 | 1.00  | 59.10 |      | C0 |
| ANISOU12312 | CB  | LYS D 180 | 6270   | 8430   | 7760   | -2030 | 1100  | -640 | C0 |
| ATOM 12313  | CG  | LYS D 180 | -7.496 | 22.826 | 18.942 | 1.00  | 58.65 |      | C0 |
| ANISOU12313 | CG  | LYS D 180 | 6250   | 8380   | 7650   | -1920 | 1220  | -530 | C0 |
| ATOM 12314  | CD  | LYS D 180 | -6.430 | 23.356 | 18.026 | 1.00  | 60.37 |      | C0 |
| ANISOU12314 | CD  | LYS D 180 | 6360   | 8680   | 7900   | -2070 | 1340  | -460 | C0 |
| ATOM 12315  | CE  | LYS D 180 | -6.446 | 22.691 | 16.669 | 1.00  | 60.30 |      | C0 |
| ANISOU12315 | CE  | LYS D 180 | 6390   | 8700   | 7820   | -1960 | 1470  | -360 | C0 |
| ATOM 12316  | NZ  | LYS D 180 | -7.572 | 23.185 | 15.846 | 1.00  | 59.96 |      | N0 |
| ANISOU12316 | NZ  | LYS D 180 | 6590   | 8440   | 7750   | -1950 | 1500  | -310 | N0 |
| ATOM 12317  | H   | LYS D 180 | -7.474 | 24.128 | 22.740 | 1.00  | 60.02 |      | H0 |
| ANISOU12317 | H   | LYS D 180 | 6310   | 8600   | 7890   | -2130 | 880   | -850 | H0 |
| ATOM 12318  | HA  | LYS D 180 | -8.326 | 21.904 | 21.352 | 1.00  | 56.40 |      | H0 |
| ANISOU12318 | HA  | LYS D 180 | 5940   | 8160   | 7320   | -1730 | 990   | -690 | H0 |
| ATOM 12319  | HB2 | LYS D 180 | -8.274 | 24.109 | 20.346 | 1.00  | 58.50 |      | H0 |
| ANISOU12319 | HB2 | LYS D 180 | 6350   | 8180   | 7700   | -2060 | 1080  | -660 | H0 |
| ATOM 12320  | HB3 | LYS D 180 | -6.694 | 24.039 | 20.396 | 1.00  | 60.48 |      | H0 |
| ANISOU12320 | HB3 | LYS D 180 | 6340   | 8670   | 7980   | -2180 | 1110  | -660 | H0 |
| ATOM 12321  | HG2 | LYS D 180 | -7.362 | 21.861 | 19.064 | 1.00  | 58.09 |      | H0 |
| ANISOU12321 | HG2 | LYS D 180 | 6110   | 8420   | 7540   | -1780 | 1220  | -530 | H0 |
| ATOM 12322  | HG3 | LYS D 180 | -8.371 | 22.956 | 18.521 | 1.00  | 57.67 |      | H0 |
| ANISOU12322 | HG3 | LYS D 180 | 6290   | 8110   | 7510   | -1880 | 1230  | -510 | H0 |
| ATOM 12323  | HD2 | LYS D 180 | -6.557 | 24.322 | 17.910 | 1.00  | 61.10 |      | H0 |
| ANISOU12323 | HD2 | LYS D 180 | 6520   | 8650   | 8040   | -2220 | 1350  | -450 | H0 |
| ATOM 12324  | HD3 | LYS D 180 | -5.552 | 23.214 | 18.439 | 1.00  | 61.49 |      | H0 |
| ANISOU12324 | HD3 | LYS D 180 | 6320   | 8980   | 8060   | -2120 | 1330  | -480 | H0 |
| ATOM 12325  | HE2 | LYS D 180 | -5.607 | 22.873 | 16.204 | 1.00  | 61.78 |      | H0 |
| ANISOU12325 | HE2 | LYS D 180 | 6460   | 8990   | 8020   | -2040 | 1550  | -320 | H0 |
| ATOM 12326  | HE3 | LYS D 180 | -6.529 | 21.725 | 16.778 | 1.00  | 59.59 |      | H0 |
| ANISOU12326 | HE3 | LYS D 180 | 6270   | 8680   | 7690   | -1800 | 1460  | -380 | H0 |
| ATOM 12327  | HZ1 | LYS D 180 | -8.358 | 22.886 | 16.187 | 1.00  | 58.51 |      | H0 |
| ANISOU12327 | HZ1 | LYS D 180 | 6500   | 8180   | 7550   | -1860 | 1430  | -340 | H0 |
| ATOM 12328  | HZ2 | LYS D 180 | -7.485 | 22.885 | 14.995 | 1.00  | 59.96 |      | H0 |
| ANISOU12328 | HZ2 | LYS D 180 | 6610   | 8470   | 7700   | -1910 | 1580  | -250 | H0 |
| ATOM 12329  | HZ3 | LYS D 180 | -7.575 | 24.091 | 15.840 | 1.00  | 60.51 |      | H0 |
| ANISOU12329 | HZ3 | LYS D 180 | 6700   | 8420   | 7870   | -2090 | 1500  | -290 | H0 |
| ATOM 12330  | N   | ASN D 181 | -6.276 | 20.483 | 21.274 | 1.00  | 57.01 |      | N0 |
| ANISOU12330 | N   | ASN D 181 | 5640   | 8650   | 7370   | -1630 | 1060  | -630 | N0 |
| ATOM 12331  | CA  | ASN D 181 | -5.056 | 19.639 | 21.180 | 1.00  | 57.86 |      | C0 |
| ANISOU12331 | CA  | ASN D 181 | 5510   | 9010   | 7470   | -1540 | 1110  | -580 | C0 |
| ATOM 12332  | C   | ASN D 181 | -4.933 | 19.118 | 19.747 | 1.00  | 58.14 |      | C0 |
| ANISOU12332 | C   | ASN D 181 | 5590   | 9020   | 7480   | -1450 | 1260  | -500 | C0 |
| ATOM 12333  | O   | ASN D 181 | -5.970 | 18.965 | 19.068 | 1.00  | 56.34 |      | O0 |
| ANISOU12333 | O   | ASN D 181 | 5580   | 8600   | 7220   | -1380 | 1290  | -480 | O0 |
| ATOM 12334  | CB  | ASN D 181 | -5.077 | 18.488 | 22.186 | 1.00  | 57.26 |      | C0 |
| ANISOU12334 | CB  | ASN D 181 | 5370   | 9050   | 7340   | -1330 | 1020  | -590 | C0 |
| ATOM 12335  | CG  | ASN D 181 | -5.285 | 18.966 | 23.608 | 1.00  | 57.30 |      | C0 |
| ANISOU12335 | CG  | ASN D 181 | 5350   | 9090   | 7340   | -1410 | 870   | -670 | C0 |
| ATOM 12336  | OD1 | ASN D 181 | -4.379 | 19.518 | 24.223 | 1.00  | 58.86 |      | O0 |
| ANISOU12336 | OD1 | ASN D 181 | 5360   | 9460   | 7550   | -1540 | 820   | -720 | O0 |
| ATOM 12337  | ND2 | ASN D 181 | -6.477 | 18.759 | 24.140 | 1.00  | 56.25 |      | N0 |

|             |                |        |        |        |       |       |      |    |
|-------------|----------------|--------|--------|--------|-------|-------|------|----|
| ANISOU12337 | ND2 ASN D 181  | 5400   | 8810   | 7170   | -1330 | 810   | -700 | N0 |
| ATOM 12338  | H ASN D 181    | -7.042 | 20.037 | 21.064 | 1.00  | 55.69 |      | H0 |
| ANISOU12338 | H ASN D 181    | 5600   | 8380   | 7180   | -1520 | 1060  | -610 | H0 |
| ATOM 12339  | HA ASN D 181   | -4.270 | 20.199 | 21.380 | 1.00  | 59.42 |      | H0 |
| ANISOU12339 | HA ASN D 181   | 5570   | 9320   | 7700   | -1670 | 1100  | -600 | H0 |
| ATOM 12340  | HB2 ASN D 181  | -5.797 | 17.870 | 21.947 | 1.00  | 56.03 |      | H0 |
| ANISOU12340 | HB2 ASN D 181  | 5350   | 8780   | 7160   | -1200 | 1040  | -570 | H0 |
| ATOM 12341  | HB3 ASN D 181  | -4.229 | 18.003 | 22.132 | 1.00  | 58.37 |      | H0 |
| ANISOU12341 | HB3 ASN D 181  | 5350   | 9350   | 7480   | -1270 | 1060  | -560 | H0 |
| ATOM 12342  | HD21 ASN D 181 | -6.554 | 18.631 | 25.013 | 1.00  | 56.09 |      | H0 |
| ANISOU12342 | HD21 ASN D 181 | 5340   | 8850   | 7120   | -1300 | 730   | -730 | H0 |
| ATOM 12343  | HD22 ASN D 181 | -7.197 | 18.750 | 23.623 | 1.00  | 55.00 |      | H0 |
| ANISOU12343 | HD22 ASN D 181 | 5380   | 8500   | 7020   | -1300 | 850   | -690 | H0 |
| ATOM 12344  | N SER D 182    | -3.698 | 18.885 | 19.308 | 1.00  | 60.64 |      | N0 |
| ANISOU12344 | N SER D 182    | 5700   | 9550   | 7800   | -1440 | 1350  | -460 | N0 |
| ATOM 12345  | CA SER D 182   | -3.352 | 18.225 | 18.026 | 1.00  | 61.48 |      | C0 |
| ANISOU12345 | CA SER D 182   | 5800   | 9700   | 7860   | -1320 | 1510  | -390 | C0 |
| ATOM 12346  | C SER D 182    | -2.365 | 17.099 | 18.338 | 1.00  | 62.70 |      | C0 |
| ANISOU12346 | C SER D 182    | 5740   | 10090  | 8000   | -1120 | 1530  | -370 | C0 |
| ATOM 12347  | O SER D 182    | -1.210 | 17.406 | 18.672 | 1.00  | 64.44 |      | O0 |
| ANISOU12347 | O SER D 182    | 5690   | 10540  | 8250   | -1210 | 1530  | -360 | O0 |
| ATOM 12348  | CB SER D 182   | -2.802 | 19.217 | 17.036 | 1.00  | 62.85 |      | C0 |
| ANISOU12348 | CB SER D 182   | 5930   | 9890   | 8060   | -1520 | 1620  | -340 | C0 |
| ATOM 12349  | OG SER D 182   | -2.636 | 18.618 | 15.761 | 1.00  | 63.65 |      | O0 |
| ANISOU12349 | OG SER D 182   | 6070   | 10020  | 8090   | -1400 | 1770  | -280 | O0 |
| ATOM 12350  | H SER D 182    | -2.956 | 19.127 | 19.778 | 1.00  | 61.78 |      | H0 |
| ANISOU12350 | H SER D 182    | 5670   | 9840   | 7970   | -1520 | 1320  | -470 | H0 |
| ATOM 12351  | HA SER D 182   | -4.179 | 17.822 | 17.647 | 1.00  | 60.09 |      | H0 |
| ANISOU12351 | HA SER D 182   | 5800   | 9380   | 7650   | -1230 | 1520  | -390 | H0 |
| ATOM 12352  | HB2 SER D 182  | -3.419 | 19.980 | 16.962 | 1.00  | 62.36 |      | H0 |
| ANISOU12352 | HB2 SER D 182  | 6000   | 9670   | 8020   | -1650 | 1590  | -350 | H0 |
| ATOM 12353  | HB3 SER D 182  | -1.936 | 19.554 | 17.357 | 1.00  | 64.45 |      | H0 |
| ANISOU12353 | HB3 SER D 182  | 5940   | 10250  | 8300   | -1620 | 1620  | -340 | H0 |
| ATOM 12354  | N VAL D 183    | -2.828 | 15.849 | 18.286 | 1.00  | 62.58 |      | N0 |
| ANISOU12354 | N VAL D 183    | 5830   | 10010  | 7940   | -870  | 1540  | -370 | N0 |
| ATOM 12355  | CA VAL D 183   | -2.057 | 14.661 | 18.753 | 1.00  | 64.57 |      | C0 |
| ANISOU12355 | CA VAL D 183   | 5910   | 10440  | 8180   | -630  | 1550  | -340 | C0 |
| ATOM 12356  | C VAL D 183    | -1.904 | 13.678 | 17.589 | 1.00  | 65.28 |      | C0 |
| ANISOU12356 | C VAL D 183    | 6070   | 10510  | 8220   | -430  | 1710  | -320 | C0 |
| ATOM 12357  | O VAL D 183    | -2.869 | 13.520 | 16.822 | 1.00  | 64.19 |      | O0 |
| ANISOU12357 | O VAL D 183    | 6180   | 10160  | 8050   | -420  | 1750  | -340 | O0 |
| ATOM 12358  | CB VAL D 183   | -2.735 | 13.996 | 19.967 | 1.00  | 63.79 |      | C0 |
| ANISOU12358 | CB VAL D 183   | 5890   | 10270  | 8080   | -510  | 1410  | -360 | C0 |
| ATOM 12359  | CG1 VAL D 183  | -1.789 | 13.028 | 20.662 | 1.00  | 65.79 |      | C0 |
| ANISOU12359 | CG1 VAL D 183  | 5930   | 10740  | 8320   | -290  | 1400  | -320 | C0 |
| ATOM 12360  | CG2 VAL D 183  | -3.274 | 15.023 | 20.953 | 1.00  | 62.57 |      | C0 |
| ANISOU12360 | CG2 VAL D 183  | 5770   | 10060  | 7940   | -710  | 1260  | -410 | C0 |
| ATOM 12361  | H VAL D 183    | -3.652 | 15.642 | 17.958 | 1.00  | 61.34 |      | H0 |
| ANISOU12361 | H VAL D 183    | 5860   | 9690   | 7760   | -830  | 1550  | -380 | H0 |
| ATOM 12362  | HA VAL D 183   | -1.170 | 14.957 | 19.023 | 1.00  | 65.99 |      | H0 |
| ANISOU12362 | HA VAL D 183   | 5880   | 10810  | 8380   | -690  | 1550  | -330 | H0 |
| ATOM 12363  | HB VAL D 183   | -3.502 | 13.476 | 19.627 | 1.00  | 62.57 |      | H0 |
| ANISOU12363 | HB VAL D 183   | 5930   | 9950   | 7900   | -420  | 1430  | -370 | H0 |
| ATOM 12364  | HG11 VAL D 183 | -1.569 | 12.297 | 20.058 | 1.00  | 66.16 |      | H0 |

|                            |        |        |        |      |       |      |    |
|----------------------------|--------|--------|--------|------|-------|------|----|
| ANISOU12364 HG11 VAL D 183 | 6000   | 10780  | 8360   | -140 | 1490  | -290 | H0 |
| ATOM 12365 HG12 VAL D 183  | -2.217 | 12.671 | 21.459 | 1.00 | 64.99 |      | H0 |
| ANISOU12365 HG12 VAL D 183 | 5880   | 10590  | 8210   | -230 | 1310  | -320 | H0 |
| ATOM 12366 HG13 VAL D 183  | -0.973 | 13.495 | 20.914 | 1.00 | 67.00 |      | H0 |
| ANISOU12366 HG13 VAL D 183 | 5880   | 11080  | 8490   | -380 | 1380  | -310 | H0 |
| ATOM 12367 HG21 VAL D 183  | -2.598 | 15.703 | 21.116 | 1.00 | 63.81 |      | H0 |
| ANISOU12367 HG21 VAL D 183 | 5770   | 10350  | 8120   | -850 | 1250  | -420 | H0 |
| ATOM 12368 HG22 VAL D 183  | -3.500 | 14.583 | 21.791 | 1.00 | 62.32 |      | H0 |
| ANISOU12368 HG22 VAL D 183 | 5740   | 10040  | 7900   | -630 | 1180  | -410 | H0 |
| ATOM 12369 HG23 VAL D 183  | -4.071 | 15.442 | 20.583 | 1.00 | 61.48 |      | H0 |
| ANISOU12369 HG23 VAL D 183 | 5800   | 9750   | 7800   | -800 | 1270  | -430 | H0 |
| ATOM 12370 N THR D 184     | -0.726 | 13.056 | 17.481 | 1.00 | 68.22 |      | N0 |
| ANISOU12370 N THR D 184    | 6220   | 11110  | 8590   | -280 | 1800  | -280 | N0 |
| ATOM 12371 CA THR D 184    | -0.392 | 11.979 | 16.510 | 1.00 | 70.01 |      | C0 |
| ANISOU12371 CA THR D 184   | 6480   | 11350  | 8770   | -30  | 1960  | -270 | C0 |
| ATOM 12372 C THR D 184     | -0.294 | 10.657 | 17.282 | 1.00 | 70.63 |      | C0 |
| ANISOU12372 C THR D 184    | 6550   | 11430  | 8860   | 260  | 1920  | -260 | C0 |
| ATOM 12373 O THR D 184     | 0.588  | 10.559 | 18.154 | 1.00 | 73.11 |      | O0 |
| ANISOU12373 O THR D 184    | 6600   | 11970  | 9200   | 320  | 1860  | -210 | O0 |
| ATOM 12374 CB THR D 184    | 0.899  | 12.317 | 15.752 | 1.00 | 72.94 |      | C0 |
| ANISOU12374 CB THR D 184   | 6590   | 11990  | 9130   | -60  | 2110  | -230 | C0 |
| ATOM 12375 OG1 THR D 184   | 0.790  | 13.653 | 15.260 | 1.00 | 72.66 |      | O0 |
| ANISOU12375 OG1 THR D 184  | 6570   | 11940  | 9100   | -360 | 2120  | -220 | O0 |
| ATOM 12376 CG2 THR D 184   | 1.182  | 11.376 | 14.602 | 1.00 | 74.50 |      | C0 |
| ANISOU12376 CG2 THR D 184  | 6850   | 12190  | 9260   | 170  | 2290  | -240 | C0 |
| ATOM 12377 H THR D 184     | -0.018 | 13.259 | 18.017 | 1.00 | 69.30 |      | H0 |
| ANISOU12377 H THR D 184    | 6150   | 11420  | 8750   | -300 | 1760  | -260 | H0 |
| ATOM 12378 HA THR D 184    | -1.128 | 11.912 | 15.861 | 1.00 | 68.98 |      | H0 |
| ANISOU12378 HA THR D 184   | 6560   | 11050  | 8610   | -40  | 1990  | -300 | H0 |
| ATOM 12379 HB THR D 184    | 1.652  | 12.274 | 16.390 | 1.00 | 74.14 |      | H0 |
| ANISOU12379 HB THR D 184   | 6520   | 12330  | 9320   | -20  | 2070  | -200 | H0 |
| ATOM 12380 HG21 THR D 184  | 1.384  | 10.488 | 14.948 | 1.00 | 74.90 |      | H0 |
| ANISOU12380 HG21 THR D 184 | 6880   | 12260  | 9320   | 390  | 2290  | -240 | H0 |
| ATOM 12381 HG22 THR D 184  | 1.944  | 11.705 | 14.092 | 1.00 | 75.93 |      | H0 |
| ANISOU12381 HG22 THR D 184 | 6870   | 12540  | 9430   | 130  | 2390  | -210 | H0 |
| ATOM 12382 HG23 THR D 184  | 0.401  | 11.327 | 14.021 | 1.00 | 73.21 |      | H0 |
| ANISOU12382 HG23 THR D 184 | 6910   | 11840  | 9060   | 150  | 2320  | -270 | H0 |
| ATOM 12383 N TYR D 185     | -1.183 | 9.699  | 16.991 | 1.00 | 69.38 |      | N0 |
| ANISOU12383 N TYR D 185    | 6660   | 11030  | 8680   | 420  | 1940  | -290 | N0 |
| ATOM 12384 CA TYR D 185    | -1.299 | 8.389  | 17.689 | 1.00 | 69.37 |      | C0 |
| ANISOU12384 CA TYR D 185   | 6720   | 10950  | 8690   | 690  | 1900  | -270 | C0 |
| ATOM 12385 C TYR D 185     | -0.576 | 7.308  | 16.874 | 1.00 | 72.62 |      | C0 |
| ANISOU12385 C TYR D 185    | 7110   | 11400  | 9080   | 970  | 2070  | -270 | C0 |
| ATOM 12386 O TYR D 185     | -0.061 | 7.626  | 15.785 | 1.00 | 72.67 |      | O0 |
| ANISOU12386 O TYR D 185    | 7060   | 11500  | 9050   | 940  | 2210  | -300 | O0 |
| ATOM 12387 CB TYR D 185    | -2.773 | 8.055  | 17.932 | 1.00 | 66.45 |      | C0 |
| ANISOU12387 CB TYR D 185   | 6660   | 10270  | 8320   | 650  | 1810  | -310 | C0 |
| ATOM 12388 CG TYR D 185    | -3.538 | 9.120  | 18.680 | 1.00 | 63.43 |      | C0 |
| ANISOU12388 CG TYR D 185   | 6300   | 9850   | 7950   | 400  | 1660  | -320 | C0 |
| ATOM 12389 CD1 TYR D 185   | -4.111 | 10.189 | 18.011 | 1.00 | 61.69 |      | C0 |
| ANISOU12389 CD1 TYR D 185  | 6170   | 9560   | 7710   | 160  | 1670  | -360 | C0 |
| ATOM 12390 CD2 TYR D 185   | -3.690 | 9.062  | 20.056 | 1.00 | 62.58 |      | C0 |
| ANISOU12390 CD2 TYR D 185  | 6130   | 9780   | 7860   | 410  | 1520  | -280 | C0 |
| ATOM 12391 CE1 TYR D 185   | -4.817 | 11.171 | 18.687 | 1.00 | 60.08 |      | C0 |



|             |               |        |        |        |      |       |      |    |
|-------------|---------------|--------|--------|--------|------|-------|------|----|
| ANISOU12391 | CE1 TYR D 185 | 6000   | 9300   | 7520   | -40  | 1540  | -370 | C0 |
| ATOM 12392  | CE2 TYR D 185 | -4.395 | 10.034 | 20.748 | 1.00 | 60.69 |      | C0 |
| ANISOU12392 | CE2 TYR D 185 | 5930   | 9500   | 7630   | 190  | 1390  | -300 | C0 |
| ATOM 12393  | CZ TYR D 185  | -4.960 | 11.093 | 20.061 | 1.00 | 59.57 |      | C0 |
| ANISOU12393 | CZ TYR D 185  | 5880   | 9270   | 7480   | -30  | 1400  | -350 | C0 |
| ATOM 12394  | OH TYR D 185  | -5.657 | 12.057 | 20.728 | 1.00 | 57.77 |      | O0 |
| ANISOU12394 | OH TYR D 185  | 5700   | 8990   | 7260   | -220 | 1290  | -380 | O0 |
| ATOM 12395  | H TYR D 185   | -1.796 | 9.784  | 16.322 | 1.00 | 68.48 |      | H0 |
| ANISOU12395 | H TYR D 185   | 6720   | 10770  | 8530   | 360  | 1970  | -330 | H0 |
| ATOM 12396  | HA TYR D 185  | -0.849 | 8.462  | 18.569 | 1.00 | 70.06 |      | H0 |
| ANISOU12396 | HA TYR D 185  | 6640   | 11170  | 8800   | 700  | 1820  | -230 | H0 |
| ATOM 12397  | HB2 TYR D 185 | -3.203 | 7.906  | 17.065 | 1.00 | 65.97 |      | H0 |
| ANISOU12397 | HB2 TYR D 185 | 6760   | 10090  | 8220   | 640  | 1880  | -360 | H0 |
| ATOM 12398  | HB3 TYR D 185 | -2.822 | 7.218  | 18.438 | 1.00 | 66.66 |      | H0 |
| ANISOU12398 | HB3 TYR D 185 | 6720   | 10250  | 8360   | 810  | 1790  | -280 | H0 |
| ATOM 12399  | HD1 TYR D 185 | -4.020 | 10.250 | 17.075 | 1.00 | 62.14 |      | H0 |
| ANISOU12399 | HD1 TYR D 185 | 6270   | 9600   | 7740   | 150  | 1760  | -380 | H0 |
| ATOM 12400  | HD2 TYR D 185 | -3.310 | 8.343  | 20.532 | 1.00 | 63.50 |      | H0 |
| ANISOU12400 | HD2 TYR D 185 | 6190   | 9950   | 7990   | 570  | 1510  | -240 | H0 |
| ATOM 12401  | HE1 TYR D 185 | -5.201 | 11.890 | 18.213 | 1.00 | 59.45 |      | H0 |
| ANISOU12401 | HE1 TYR D 185 | 5990   | 9160   | 7440   | -190 | 1550  | -390 | H0 |
| ATOM 12402  | HE2 TYR D 185 | -4.488 | 9.976  | 21.684 | 1.00 | 60.67 |      | H0 |
| ANISOU12402 | HE2 TYR D 185 | 5880   | 9540   | 7630   | 210  | 1300  | -280 | H0 |
| ATOM 12403  | N SER D 186   | -0.535 | 6.074  | 17.393 | 1.00 | 74.79 |      | N0 |
| ANISOU12403 | N SER D 186   | 7440   | 11590  | 9380   | 1240 | 2070  | -240 | N0 |
| ATOM 12404  | CA SER D 186  | 0.300  | 4.952  | 16.880 | 1.00 | 78.20 |      | C0 |
| ANISOU12404 | CA SER D 186  | 7830   | 12070  | 9810   | 1560 | 2220  | -240 | C0 |
| ATOM 12405  | C SER D 186   | -0.433 | 4.152  | 15.792 | 1.00 | 79.13 |      | C0 |
| ANISOU12405 | C SER D 186   | 8280   | 11900  | 9880   | 1650 | 2340  | -340 | C0 |
| ATOM 12406  | O SER D 186   | 0.209  | 3.269  | 15.190 | 1.00 | 81.90 |      | O0 |
| ANISOU12406 | O SER D 186   | 8640   | 12260  | 10220  | 1920 | 2490  | -360 | O0 |
| ATOM 12407  | CB SER D 186  | 0.734  | 4.050  | 18.005 | 1.00 | 79.14 |      | C0 |
| ANISOU12407 | CB SER D 186  | 7860   | 12240  | 9980   | 1820 | 2160  | -140 | C0 |
| ATOM 12408  | OG SER D 186  | -0.391 | 3.458  | 18.634 | 1.00 | 78.06 |      | O0 |
| ANISOU12408 | OG SER D 186  | 7990   | 11810  | 9860   | 1830 | 2050  | -140 | O0 |
| ATOM 12409  | H SER D 186   | -1.028 | 5.828  | 18.118 | 1.00 | 73.82 |      | H0 |
| ANISOU12409 | H SER D 186   | 7400   | 11370  | 9280   | 1250 | 1970  | -220 | H0 |
| ATOM 12410  | HA SER D 186  | 1.116  | 5.347  | 16.471 | 1.00 | 79.43 |      | H0 |
| ANISOU12410 | HA SER D 186  | 7800   | 12430  | 9950   | 1550 | 2300  | -230 | H0 |
| ATOM 12411  | HB2 SER D 186 | 1.322  | 3.345  | 17.651 | 1.00 | 81.18 |      | H0 |
| ANISOU12411 | HB2 SER D 186 | 8080   | 12530  | 10240  | 2050 | 2270  | -140 | H0 |
| ATOM 12412  | HB3 SER D 186 | 1.243  | 4.572  | 18.664 | 1.00 | 79.66 |      | H0 |
| ANISOU12412 | HB3 SER D 186 | 7700   | 12510  | 10060  | 1760 | 2080  | -90  | H0 |
| ATOM 12413  | N CYS D 187   | -1.719 | 4.435  | 15.554 | 1.00 | 77.68 |      | N0 |
| ANISOU12413 | N CYS D 187   | 8360   | 11480  | 9680   | 1450 | 2270  | -400 | N0 |
| ATOM 12414  | CA CYS D 187  | -2.571 | 3.765  | 14.531 | 1.00 | 77.45 |      | C0 |
| ANISOU12414 | CA CYS D 187  | 8660   | 11180  | 9600   | 1480 | 2350  | -510 | C0 |
| ATOM 12415  | C CYS D 187   | -2.256 | 4.295  | 13.128 | 1.00 | 77.41 |      | C0 |
| ANISOU12415 | C CYS D 187   | 8640   | 11270  | 9490   | 1410 | 2490  | -580 | C0 |
| ATOM 12416  | O CYS D 187   | -2.366 | 3.513  | 12.165 | 1.00 | 78.60 |      | O0 |
| ANISOU12416 | O CYS D 187   | 8980   | 11300  | 9580   | 1540 | 2620  | -680 | O0 |
| ATOM 12417  | CB CYS D 187  | -4.052 | 4.019  | 14.789 | 1.00 | 75.59 |      | C0 |
| ANISOU12417 | CB CYS D 187  | 8660   | 10710  | 9360   | 1270 | 2210  | -540 | C0 |
| ATOM 12418  | SG CYS D 187  | -4.532 | 5.753  | 14.552 | 1.00 | 74.81 |      | S0 |

|             |     |           |        |        |        |      |       |      |    |
|-------------|-----|-----------|--------|--------|--------|------|-------|------|----|
| ANISOU12418 | SG  | CYS D 187 | 8490   | 10710  | 9220   | 910  | 2130  | -540 | S0 |
| ATOM 12419  | H   | CYS D 187 | -2.180 | 5.070  | 16.016 | 1.00 | 76.00 |      | H0 |
| ANISOU12419 | H   | CYS D 187 | 8140   | 11260  | 9480   | 1280 | 2160  | -380 | H0 |
| ATOM 12420  | HA  | CYS D 187 | -2.398 | 2.796  | 14.561 | 1.00 | 78.68 |      | H0 |
| ANISOU12420 | HA  | CYS D 187 | 8880   | 11240  | 9770   | 1690 | 2400  | -520 | H0 |
| ATOM 12421  | HB2 | CYS D 187 | -4.584 | 3.462  | 14.184 | 1.00 | 75.80 |      | H0 |
| ANISOU12421 | HB2 | CYS D 187 | 8890   | 10560  | 9350   | 1300 | 2250  | -610 | H0 |
| ATOM 12422  | HB3 | CYS D 187 | -4.268 | 3.758  | 15.708 | 1.00 | 75.27 |      | H0 |
| ANISOU12422 | HB3 | CYS D 187 | 8610   | 10620  | 9370   | 1300 | 2120  | -490 | H0 |
| ATOM 12423  | N   | CYS D 188 | -1.918 | 5.585  | 13.029 | 1.00 | 76.34 |      | N0 |
| ANISOU12423 | N   | CYS D 188 | 8320   | 11340  | 9340   | 1190 | 2470  | -530 | N0 |
| ATOM 12424  | CA  | CYS D 188 | -2.160 | 6.435  | 11.833 | 1.00 | 75.82 |      | C0 |
| ANISOU12424 | CA  | CYS D 188 | 8310   | 11310  | 9180   | 1000 | 2550  | -580 | C0 |
| ATOM 12425  | C   | CYS D 188 | -1.066 | 7.492  | 11.690 | 1.00 | 75.19 |      | C0 |
| ANISOU12425 | C   | CYS D 188 | 7930   | 11540  | 9100   | 880  | 2610  | -500 | C0 |
| ATOM 12426  | O   | CYS D 188 | -0.587 | 8.027  | 12.686 | 1.00 | 75.43 |      | O0 |
| ANISOU12426 | O   | CYS D 188 | 7730   | 11710  | 9220   | 810  | 2520  | -430 | O0 |
| ATOM 12427  | CB  | CYS D 188 | -3.525 | 7.101  | 11.957 | 1.00 | 74.51 |      | C0 |
| ANISOU12427 | CB  | CYS D 188 | 8340   | 10960  | 9010   | 750  | 2410  | -590 | C0 |
| ATOM 12428  | SG  | CYS D 188 | -4.822 | 5.974  | 12.540 | 1.00 | 75.66 |      | S0 |
| ANISOU12428 | SG  | CYS D 188 | 8780   | 10770  | 9190   | 830  | 2290  | -650 | S0 |
| ATOM 12429  | H   | CYS D 188 | -1.507 | 6.044  | 13.700 | 1.00 | 76.37 |      | H0 |
| ANISOU12429 | H   | CYS D 188 | 8140   | 11480  | 9390   | 1140 | 2410  | -470 | H0 |
| ATOM 12430  | HA  | CYS D 188 | -2.159 | 5.857  | 11.037 | 1.00 | 76.71 |      | H0 |
| ANISOU12430 | HA  | CYS D 188 | 8550   | 11370  | 9230   | 1110 | 2660  | -640 | H0 |
| ATOM 12431  | HB2 | CYS D 188 | -3.461 | 7.852  | 12.582 | 1.00 | 73.99 |      | H0 |
| ANISOU12431 | HB2 | CYS D 188 | 8150   | 10960  | 8990   | 620  | 2320  | -540 | H0 |
| ATOM 12432  | HB3 | CYS D 188 | -3.790 | 7.457  | 11.084 | 1.00 | 74.69 |      | H0 |
| ANISOU12432 | HB3 | CYS D 188 | 8450   | 10970  | 8960   | 660  | 2460  | -630 | H0 |
| ATOM 12433  | N   | PRO D 189 | -0.650 | 7.840  | 10.450 | 1.00 | 74.22 |      | N0 |
| ANISOU12433 | N   | PRO D 189 | 7780   | 11530  | 8880   | 850  | 2770  | -520 | N0 |
| ATOM 12434  | CA  | PRO D 189 | 0.445  | 8.787  | 10.239 | 1.00 | 74.65 |      | C0 |
| ANISOU12434 | CA  | PRO D 189 | 7540   | 11880  | 8940   | 730  | 2850  | -440 | C0 |
| ATOM 12435  | C   | PRO D 189 | 0.088  | 10.268 | 10.440 | 1.00 | 72.00 |      | C0 |
| ANISOU12435 | C   | PRO D 189 | 7160   | 11560  | 8630   | 390  | 2750  | -370 | C0 |
| ATOM 12436  | O   | PRO D 189 | 0.993  | 11.042 | 10.696 | 1.00 | 72.64 |      | O0 |
| ANISOU12436 | O   | PRO D 189 | 6970   | 11870  | 8760   | 270  | 2770  | -300 | O0 |
| ATOM 12437  | CB  | PRO D 189 | 0.814  | 8.552  | 8.768  | 1.00 | 76.75 |      | C0 |
| ANISOU12437 | CB  | PRO D 189 | 7860   | 12230  | 9070   | 820  | 3070  | -480 | C0 |
| ATOM 12438  | CG  | PRO D 189 | -0.490 | 8.144  | 8.123  | 1.00 | 75.51 |      | C0 |
| ANISOU12438 | CG  | PRO D 189 | 8080   | 11790  | 8830   | 810  | 3040  | -580 | C0 |
| ATOM 12439  | CD  | PRO D 189 | -1.204 | 7.332  | 9.184  | 1.00 | 74.44 |      | C0 |
| ANISOU12439 | CD  | PRO D 189 | 8070   | 11420  | 8790   | 910  | 2880  | -620 | C0 |
| ATOM 12440  | HA  | PRO D 189 | 1.211  | 8.540  | 10.816 | 1.00 | 75.79 |      | H0 |
| ANISOU12440 | HA  | PRO D 189 | 7480   | 12170  | 9140   | 840  | 2860  | -400 | H0 |
| ATOM 12441  | HB2 | PRO D 189 | 1.169  | 9.369  | 8.356  | 1.00 | 77.29 |      | H0 |
| ANISOU12441 | HB2 | PRO D 189 | 7810   | 12440  | 9110   | 670  | 3120  | -420 | H0 |
| ATOM 12442  | HB3 | PRO D 189 | 1.480  | 7.841  | 8.687  | 1.00 | 78.46 |      | H0 |
| ANISOU12442 | HB3 | PRO D 189 | 7990   | 12540  | 9280   | 1030 | 3170  | -490 | H0 |
| ATOM 12443  | HG2 | PRO D 189 | -1.017 | 8.931  | 7.875  | 1.00 | 74.42 |      | H0 |
| ANISOU12443 | HG2 | PRO D 189 | 8000   | 11610  | 8660   | 610  | 2990  | -560 | H0 |
| ATOM 12444  | HG3 | PRO D 189 | -0.329 | 7.605  | 7.322  | 1.00 | 76.86 |      | H0 |
| ANISOU12444 | HG3 | PRO D 189 | 8320   | 11970  | 8910   | 940  | 3160  | -640 | H0 |
| ATOM 12445  | HD2 | PRO D 189 | -2.168 | 7.473  | 9.144  | 1.00 | 72.76 |      | H0 |

|             |               |        |        |        |      |       |      |    |
|-------------|---------------|--------|--------|--------|------|-------|------|----|
| ANISOU12445 | HD2 PRO D 189 | 8050   | 11040  | 8560   | 800  | 2800  | -650 | H0 |
| ATOM 12446  | HD3 PRO D 189 | -1.018 | 6.380  | 9.080  | 1.00 | 75.45 |      | H0 |
| ANISOU12446 | HD3 PRO D 189 | 8260   | 11500  | 8900   | 1120 | 2950  | -670 | H0 |
| ATOM 12447  | N GLU D 190   | -1.194 | 10.625 | 10.297 | 1.00 | 68.47 |      | N0 |
| ANISOU12447 | N GLU D 190   | 6980   | 10870  | 8160   | 240  | 2650  | -410 | N0 |
| ATOM 12448  | CA GLU D 190  | -1.692 | 12.029 | 10.344 | 1.00 | 66.23 |      | C0 |
| ANISOU12448 | CA GLU D 190  | 6710   | 10550  | 7900   | -60  | 2570  | -350 | C0 |
| ATOM 12449  | C GLU D 190   | -2.216 | 12.336 | 11.754 | 1.00 | 62.99 |      | C0 |
| ANISOU12449 | C GLU D 190   | 6290   | 10040  | 7600   | -150 | 2370  | -350 | C0 |
| ATOM 12450  | O GLU D 190   | -2.737 | 11.413 | 12.405 | 1.00 | 61.64 |      | O0 |
| ANISOU12450 | O GLU D 190   | 6230   | 9740   | 7450   | 0    | 2280  | -390 | O0 |
| ATOM 12451  | CB GLU D 190  | -2.774 | 12.234 | 9.281  | 1.00 | 65.57 |      | C0 |
| ANISOU12451 | CB GLU D 190  | 6910   | 10290  | 7710   | -140 | 2590  | -380 | C0 |
| ATOM 12452  | CG GLU D 190  | -2.295 | 11.990 | 7.857  | 1.00 | 67.71 |      | C0 |
| ANISOU12452 | CG GLU D 190  | 7210   | 10680  | 7840   | -60  | 2790  | -390 | C0 |
| ATOM 12453  | CD GLU D 190  | -1.611 | 13.159 | 7.159  | 1.00 | 69.59 |      | C0 |
| ANISOU12453 | CD GLU D 190  | 7300   | 11100  | 8040   | -260 | 2900  | -290 | C0 |
| ATOM 12454  | OE1 GLU D 190 | -1.312 | 13.021 | 5.951  | 1.00 | 71.20 |      | O0 |
| ANISOU12454 | OE1 GLU D 190 | 7540   | 11410  | 8100   | -200 | 3070  | -290 | O0 |
| ATOM 12455  | OE2 GLU D 190 | -1.376 | 14.203 | 7.810  | 1.00 | 68.99 |      | O0 |
| ANISOU12455 | OE2 GLU D 190 | 7090   | 11060  | 8060   | -460 | 2820  | -210 | O0 |
| ATOM 12456  | H GLU D 190   | -1.855 | 10.016 | 10.158 | 1.00 | 67.82 |      | H0 |
| ANISOU12456 | H GLU D 190   | 7080   | 10640  | 8050   | 320  | 2630  | -460 | H0 |
| ATOM 12457  | HA GLU D 190  | -0.939 | 12.633 | 10.149 | 1.00 | 67.43 |      | H0 |
| ANISOU12457 | HA GLU D 190  | 6690   | 10870  | 8060   | -150 | 2630  | -300 | H0 |
| ATOM 12458  | HB2 GLU D 190 | -3.518 | 11.625 | 9.473  | 1.00 | 64.43 |      | H0 |
| ANISOU12458 | HB2 GLU D 190 | 6930   | 9990   | 7560   | -60  | 2520  | -440 | H0 |
| ATOM 12459  | HB3 GLU D 190 | -3.112 | 13.151 | 9.352  | 1.00 | 64.77 |      | H0 |
| ANISOU12459 | HB3 GLU D 190 | 6830   | 10160  | 7630   | -320 | 2530  | -340 | H0 |
| ATOM 12460  | HG2 GLU D 190 | -1.671 | 11.234 | 7.863  | 1.00 | 68.99 |      | H0 |
| ANISOU12460 | HG2 GLU D 190 | 7290   | 10930  | 7990   | 110  | 2860  | -420 | H0 |
| ATOM 12461  | HG3 GLU D 190 | -3.066 | 11.723 | 7.313  | 1.00 | 67.13 |      | H0 |
| ANISOU12461 | HG3 GLU D 190 | 7340   | 10480  | 7680   | -50  | 2780  | -440 | H0 |
| ATOM 12462  | N ALA D 191   | -2.073 | 13.585 | 12.207 | 1.00 | 61.47 |      | N0 |
| ANISOU12462 | N ALA D 191   | 5990   | 9900   | 7470   | -400 | 2290  | -300 | N0 |
| ATOM 12463  | CA ALA D 191  | -2.533 | 14.060 | 13.535 | 1.00 | 59.36 |      | C0 |
| ANISOU12463 | CA ALA D 191  | 5700   | 9550   | 7290   | -510 | 2110  | -300 | C0 |
| ATOM 12464  | C ALA D 191   | -4.061 | 14.206 | 13.535 | 1.00 | 56.32 |      | C0 |
| ANISOU12464 | C ALA D 191   | 5610   | 8900   | 6890   | -560 | 2010  | -340 | C0 |
| ATOM 12465  | O ALA D 191   | -4.619 | 14.607 | 12.499 | 1.00 | 54.99 |      | O0 |
| ANISOU12465 | O ALA D 191   | 5600   | 8640   | 6660   | -640 | 2070  | -330 | O0 |
| ATOM 12466  | CB ALA D 191  | -1.857 | 15.363 | 13.885 | 1.00 | 60.15 |      | C0 |
| ANISOU12466 | CB ALA D 191  | 5610   | 9790   | 7460   | -760 | 2080  | -260 | C0 |
| ATOM 12467  | H ALA D 191   | -1.677 | 14.246 | 11.721 | 1.00 | 62.48 |      | H0 |
| ANISOU12467 | H ALA D 191   | 6040   | 10110  | 7590   | -510 | 2360  | -260 | H0 |
| ATOM 12468  | HA ALA D 191  | -2.284 | 13.385 | 14.208 | 1.00 | 59.48 |      | H0 |
| ANISOU12468 | HA ALA D 191  | 5650   | 9620   | 7340   | -370 | 2070  | -320 | H0 |
| ATOM 12469  | HB1 ALA D 191 | -2.127 | 15.640 | 14.777 | 1.00 | 59.40 |      | H0 |
| ANISOU12469 | HB1 ALA D 191 | 5510   | 9650   | 7420   | -820 | 1960  | -280 | H0 |
| ATOM 12470  | HB2 ALA D 191 | -0.893 | 15.247 | 13.861 | 1.00 | 61.82 |      | H0 |
| ANISOU12470 | HB2 ALA D 191 | 5620   | 10190  | 7680   | -720 | 2150  | -230 | H0 |
| ATOM 12471  | HB3 ALA D 191 | -2.116 | 16.046 | 13.243 | 1.00 | 60.13 |      | H0 |
| ANISOU12471 | HB3 ALA D 191 | 5690   | 9720   | 7440   | -890 | 2120  | -230 | H0 |
| ATOM 12472  | N TYR D 192   | -4.704 | 13.879 | 14.661 | 1.00 | 54.28 |      | N0 |

|             |     |           |        |        |        |       |       |      |    |
|-------------|-----|-----------|--------|--------|--------|-------|-------|------|----|
| ANISOU12472 | N   | TYR D 192 | 5410   | 8540   | 6680   | -520  | 1860  | -370 | N0 |
| ATOM 12473  | CA  | TYR D 192 | -6.159 | 14.065 | 14.909 | 1.00  | 52.23 |      | C0 |
| ANISOU12473 | CA  | TYR D 192 | 5380   | 8050   | 6420   | -580  | 1750  | -400 | C0 |
| ATOM 12474  | C   | TYR D 192 | -6.345 | 15.183 | 15.941 | 1.00  | 51.60 |      | C0 |
| ANISOU12474 | C   | TYR D 192 | 5240   | 7960   | 6410   | -760  | 1630  | -400 | C0 |
| ATOM 12475  | O   | TYR D 192 | -5.570 | 15.238 | 16.915 | 1.00  | 52.87 |      | O0 |
| ANISOU12475 | O   | TYR D 192 | 5210   | 8260   | 6620   | -770  | 1570  | -400 | O0 |
| ATOM 12476  | CB  | TYR D 192 | -6.809 | 12.763 | 15.386 | 1.00  | 50.85 |      | C0 |
| ANISOU12476 | CB  | TYR D 192 | 5320   | 7770   | 6230   | -390  | 1700  | -440 | C0 |
| ATOM 12477  | CG  | TYR D 192 | -7.054 | 11.728 | 14.313 | 1.00  | 50.77 |      | C0 |
| ANISOU12477 | CG  | TYR D 192 | 5470   | 7680   | 6150   | -240  | 1800  | -480 | C0 |
| ATOM 12478  | CD1 | TYR D 192 | -6.021 | 10.946 | 13.820 | 1.00  | 52.39 |      | C0 |
| ANISOU12478 | CD1 | TYR D 192 | 5580   | 8000   | 6330   | -80   | 1930  | -480 | C0 |
| ATOM 12479  | CD2 | TYR D 192 | -8.325 | 11.507 | 13.810 | 1.00  | 49.22 |      | C0 |
| ANISOU12479 | CD2 | TYR D 192 | 5510   | 7290   | 5900   | -270  | 1770  | -510 | C0 |
| ATOM 12480  | CE1 | TYR D 192 | -6.240 | 9.986  | 12.845 | 1.00  | 52.60 |      | C0 |
| ANISOU12480 | CE1 | TYR D 192 | 5760   | 7940   | 6280   | 60    | 2030  | -540 | C0 |
| ATOM 12481  | CE2 | TYR D 192 | -8.562 | 10.550 | 12.837 | 1.00  | 49.56 |      | C0 |
| ANISOU12481 | CE2 | TYR D 192 | 5700   | 7270   | 5860   | -150  | 1850  | -570 | C0 |
| ATOM 12482  | CZ  | TYR D 192 | -7.517 | 9.785  | 12.354 | 1.00  | 51.01 |      | C0 |
| ANISOU12482 | CZ  | TYR D 192 | 5810   | 7550   | 6020   | 10    | 1990  | -590 | C0 |
| ATOM 12483  | OH  | TYR D 192 | -7.747 | 8.838  | 11.400 | 1.00  | 51.81 |      | O0 |
| ANISOU12483 | OH  | TYR D 192 | 6080   | 7570   | 6040   | 130   | 2070  | -660 | O0 |
| ATOM 12484  | H   | TYR D 192 | -4.280 | 13.509 | 15.378 | 1.00  | 54.81 |      | H0 |
| ANISOU12484 | H   | TYR D 192 | 5360   | 8680   | 6780   | -450  | 1830  | -370 | H0 |
| ATOM 12485  | HA  | TYR D 192 | -6.593 | 14.344 | 14.063 | 1.00  | 51.91 |      | H0 |
| ANISOU12485 | HA  | TYR D 192 | 5460   | 7940   | 6330   | -630  | 1800  | -400 | H0 |
| ATOM 12486  | HB2 | TYR D 192 | -6.234 | 12.368 | 16.075 | 1.00  | 51.43 |      | H0 |
| ANISOU12486 | HB2 | TYR D 192 | 5270   | 7930   | 6340   | -310  | 1680  | -430 | H0 |
| ATOM 12487  | HB3 | TYR D 192 | -7.666 | 12.984 | 15.808 | 1.00  | 49.59 |      | H0 |
| ANISOU12487 | HB3 | TYR D 192 | 5260   | 7490   | 6080   | -450  | 1610  | -450 | H0 |
| ATOM 12488  | HD1 | TYR D 192 | -5.147 | 11.074 | 14.151 | 1.00  | 53.30 |      | H0 |
| ANISOU12488 | HD1 | TYR D 192 | 5510   | 8260   | 6480   | -60   | 1950  | -450 | H0 |
| ATOM 12489  | HD2 | TYR D 192 | -9.046 | 12.021 | 14.134 | 1.00  | 48.11 |      | H0 |
| ANISOU12489 | HD2 | TYR D 192 | 5430   | 7080   | 5770   | -370  | 1690  | -510 | H0 |
| ATOM 12490  | HE1 | TYR D 192 | -5.522 | 9.467  | 12.521 | 1.00  | 54.00 |      | H0 |
| ANISOU12490 | HE1 | TYR D 192 | 5880   | 8200   | 6440   | 190   | 2130  | -540 | H0 |
| ATOM 12491  | HE2 | TYR D 192 | -9.435 | 10.417 | 12.505 | 1.00  | 48.84 |      | H0 |
| ANISOU12491 | HE2 | TYR D 192 | 5760   | 7060   | 5730   | -180  | 1820  | -600 | H0 |
| ATOM 12492  | N   | GLU D 193 | -7.327 | 16.057 | 15.719 | 1.00  | 50.07 |      | N0 |
| ANISOU12492 | N   | GLU D 193 | 5200   | 7610   | 6210   | -900  | 1580  | -400 | N0 |
| ATOM 12493  | CA  | GLU D 193 | -7.599 | 17.231 | 16.587 | 1.00  | 49.97 |      | C0 |
| ANISOU12493 | CA  | GLU D 193 | 5170   | 7550   | 6260   | -1070 | 1470  | -410 | C0 |
| ATOM 12494  | C   | GLU D 193 | -8.777 | 16.913 | 17.515 | 1.00  | 47.97 |      | C0 |
| ANISOU12494 | C   | GLU D 193 | 5050   | 7170   | 6010   | -1010 | 1350  | -460 | C0 |
| ATOM 12495  | O   | GLU D 193 | -9.688 | 16.173 | 17.091 | 1.00  | 47.15 |      | O0 |
| ANISOU12495 | O   | GLU D 193 | 5100   | 6950   | 5860   | -910  | 1350  | -460 | O0 |
| ATOM 12496  | CB  | GLU D 193 | -7.856 | 18.472 | 15.735 | 1.00  | 50.11 |      | C0 |
| ANISOU12496 | CB  | GLU D 193 | 5280   | 7470   | 6280   | -1250 | 1520  | -370 | C0 |
| ATOM 12497  | CG  | GLU D 193 | -6.626 | 18.934 | 14.977 | 1.00  | 52.12 |      | C0 |
| ANISOU12497 | CG  | GLU D 193 | 5390   | 7870   | 6540   | -1350 | 1650  | -320 | C0 |
| ATOM 12498  | CD  | GLU D 193 | -6.813 | 20.209 | 14.177 | 1.00  | 52.67 |      | C0 |
| ANISOU12498 | CD  | GLU D 193 | 5550   | 7840   | 6620   | -1540 | 1700  | -250 | C0 |
| ATOM 12499  | OE1 | GLU D 193 | -7.899 | 20.802 | 14.270 | 1.00  | 51.53 |      | O0 |

|             |       |     |     |     |      |         |        |        |      |       |    |
|-------------|-------|-----|-----|-----|------|---------|--------|--------|------|-------|----|
| ANISOU12499 | OE1   | GLU | D   | 193 | 5580 | 7510    | 6490   | -1580  | 1630 | -250  | O0 |
| ATOM        | 12500 | OE2 | GLU | D   | 193  | -5.870  | 20.606 | 13.465 | 1.00 | 54.78 | O0 |
| ANISOU12500 | OE2   | GLU | D   | 193 | 5700 | 8220    | 6890   | -1630  | 1820 | -190  | O0 |
| ATOM        | 12501 | H   | GLU | D   | 193  | -7.898  | 15.984 | 15.013 | 1.00 | 49.80 | H0 |
| ANISOU12501 | H     | GLU | D   | 193 | 5300 | 7490    | 6130   | -890   | 1610 | -400  | H0 |
| ATOM        | 12502 | HA  | GLU | D   | 193  | -6.803  | 17.394 | 17.142 | 1.00 | 50.73 | H0 |
| ANISOU12502 | HA    | GLU | D   | 193 | 5110 | 7770    | 6400   | -1110  | 1460 | -420  | H0 |
| ATOM        | 12503 | HB2 | GLU | D   | 193  | -8.571  | 18.273 | 15.095 | 1.00 | 49.48 | H0 |
| ANISOU12503 | HB2   | GLU | D   | 193 | 5340 | 7300    | 6150   | -1200  | 1540 | -360  | H0 |
| ATOM        | 12504 | HB3 | GLU | D   | 193  | -8.164  | 19.196 | 16.319 | 1.00 | 49.86 | H0 |
| ANISOU12504 | HB3   | GLU | D   | 193 | 5270 | 7380    | 6300   | -1350  | 1450 | -390  | H0 |
| ATOM        | 12505 | HG2 | GLU | D   | 193  | -5.895  | 19.075 | 15.616 | 1.00 | 52.89 | H0 |
| ANISOU12505 | HG2   | GLU | D   | 193 | 5330 | 8080    | 6690   | -1390  | 1620 | -330  | H0 |
| ATOM        | 12506 | HG3 | GLU | D   | 193  | -6.347  | 18.222 | 14.362 | 1.00 | 52.46 | H0 |
| ANISOU12506 | HG3   | GLU | D   | 193 | 5410 | 7980    | 6530   | -1240  | 1730 | -300  | H0 |
| ATOM        | 12507 | N   | ASP | D   | 194  | -8.734  | 17.442 | 18.739 | 1.00 | 48.13 | N0 |
| ANISOU12507 | N     | ASP | D   | 194 | 4990 | 7210    | 6080   | -1080  | 1240 | -490  | N0 |
| ATOM        | 12508 | CA  | ASP | D   | 194  | -9.811  | 17.317 | 19.757 | 1.00 | 47.22 | C0 |
| ANISOU12508 | CA    | ASP | D   | 194 | 4980 | 7000    | 5960   | -1050  | 1130 | -530  | C0 |
| ATOM        | 12509 | C   | ASP | D   | 194  | -9.929  | 18.636 | 20.523 | 1.00 | 47.39 | C0 |
| ANISOU12509 | C     | ASP | D   | 194 | 4990 | 6990    | 6030   | -1210  | 1050 | -580  | C0 |
| ATOM        | 12510 | O   | ASP | D   | 194  | -8.915  | 19.348 | 20.641 | 1.00 | 48.82 | O0 |
| ANISOU12510 | O     | ASP | D   | 194 | 5030 | 7270    | 6250   | -1340  | 1060 | -590  | O0 |
| ATOM        | 12511 | CB  | ASP | D   | 194  | -9.546  | 16.150 | 20.714 | 1.00 | 47.32 | C0 |
| ANISOU12511 | CB    | ASP | D   | 194 | 4900 | 7120    | 5960   | -890   | 1080 | -530  | C0 |
| ATOM        | 12512 | CG  | ASP | D   | 194  | -8.385  | 16.373 | 21.669 | 1.00 | 49.36 | C0 |
| ANISOU12512 | CG    | ASP | D   | 194 | 4940 | 7570    | 6240   | -920   | 1030 | -550  | C0 |
| ATOM        | 12513 | OD1 | ASP | D   | 194  | -8.586  | 17.079 | 22.675 | 1.00 | 49.82 | O0 |
| ANISOU12513 | OD1   | ASP | D   | 194 | 4980 | 7650    | 6310   | -1020  | 930  | -600  | O0 |
| ATOM        | 12514 | OD2 | ASP | D   | 194  | -7.283  | 15.839 | 21.398 | 1.00 | 51.01 | O0 |
| ANISOU12514 | OD2   | ASP | D   | 194 | 4990 | 7940    | 6450   | -850   | 1090 | -510  | O0 |
| ATOM        | 12515 | H   | ASP | D   | 194  | -8.018  | 17.924 | 19.032 | 1.00 | 49.13 | H0 |
| ANISOU12515 | H     | ASP | D   | 194 | 5000 | 7430    | 6240   | -1170  | 1240 | -500  | H0 |
| ATOM        | 12516 | HA  | ASP | D   | 194  | -10.661 | 17.148 | 19.289 | 1.00 | 46.26 | H0 |
| ANISOU12516 | HA    | ASP | D   | 194 | 4990 | 6770    | 5820   | -1010  | 1130 | -520  | H0 |
| ATOM        | 12517 | HB2 | ASP | D   | 194  | -10.352 | 15.986 | 21.245 | 1.00 | 46.54 | H0 |
| ANISOU12517 | HB2   | ASP | D   | 194 | 4890 | 6950    | 5850   | -860   | 1020 | -550  | H0 |
| ATOM        | 12518 | HB3 | ASP | D   | 194  | -9.360  | 15.345 | 20.188 | 1.00 | 47.61 | H0 |
| ANISOU12518 | HB3   | ASP | D   | 194 | 4950 | 7160    | 5980   | -780   | 1140 | -510  | H0 |
| ATOM        | 12519 | N   | VAL | D   | 195  | -11.128 | 18.946 | 21.015 | 1.00 | 46.70 | N0 |
| ANISOU12519 | N     | VAL | D   | 195 | 5040 | 6770    | 5940   | -1210  | 980  | -610  | N0 |
| ATOM        | 12520 | CA  | VAL | D   | 195  | -11.343 | 19.989 | 22.057 | 1.00 | 47.04 | C0 |
| ANISOU12520 | CA    | VAL | D   | 195 | 5080 | 6780    | 6010   | -1320  | 890  | -680  | C0 |
| ATOM        | 12521 | C   | VAL | D   | 195  | -11.455 | 19.260 | 23.397 | 1.00 | 47.15 | C0 |
| ANISOU12521 | C     | VAL | D   | 195 | 5030 | 6900    | 5980   | -1220  | 800  | -720  | C0 |
| ATOM        | 12522 | O   | VAL | D   | 195  | -12.216 | 18.273 | 23.473 | 1.00 | 45.34 | O0 |
| ANISOU12522 | O     | VAL | D   | 195 | 4870 | 6640    | 5710   | -1080  | 790  | -690  | O0 |
| ATOM        | 12523 | CB  | VAL | D   | 195  | -12.576 | 20.866 | 21.774 | 1.00 | 46.67 | C0 |
| ANISOU12523 | CB    | VAL | D   | 195 | 5220 | 6530    | 5980   | -1360  | 880  | -690  | C0 |
| ATOM        | 12524 | CG1 | VAL | D   | 195  | -12.853 | 21.826 | 22.922 | 1.00 | 46.98 | C0 |
| ANISOU12524 | CG1   | VAL | D   | 195 | 5280 | 6530    | 6040   | -1440  | 790  | -790  | C0 |
| ATOM        | 12525 | CG2 | VAL | D   | 195  | -12.425 | 21.627 | 20.467 | 1.00 | 47.93 | C0 |
| ANISOU12525 | CG2   | VAL | D   | 195 | 5450 | 6590    | 6170   | -1450  | 970  | -630  | C0 |
| ATOM        | 12526 | H   | VAL | D   | 195  | -11.895 | 18.537 | 20.742 | 1.00 | 45.72 | H0 |

|                            |         |        |        |       |       |       |    |
|----------------------------|---------|--------|--------|-------|-------|-------|----|
| ANISOU12526 H VAL D 195    | 5020    | 6570   | 5780   | -1140 | 980   | -590  | H0 |
| ATOM 12527 HA VAL D 195    | -10.559 | 20.563 | 22.082 | 1.00  | 48.29 |       | H0 |
| ANISOU12527 HA VAL D 195   | 5150    | 6990   | 6200   | -1430 | 900   | -700  | H0 |
| ATOM 12528 HB VAL D 195    | -13.356 | 20.264 | 21.686 | 1.00  | 45.70 |       | H0 |
| ANISOU12528 HB VAL D 195   | 5170    | 6370   | 5820   | -1260 | 870   | -670  | H0 |
| ATOM 12529 HG11 VAL D 195  | -13.281 | 21.346 | 23.652 | 1.00  | 46.42 |       | H0 |
| ANISOU12529 HG11 VAL D 195 | 5210    | 6500   | 5930   | -1360 | 740   | -810  | H0 |
| ATOM 12530 HG12 VAL D 195  | -13.441 | 22.539 | 22.616 | 1.00  | 46.96 |       | H0 |
| ANISOU12530 HG12 VAL D 195 | 5390    | 6390   | 6060   | -1470 | 810   | -790  | H0 |
| ATOM 12531 HG13 VAL D 195  | -12.015 | 22.209 | 23.234 | 1.00  | 48.08 |       | H0 |
| ANISOU12531 HG13 VAL D 195 | 5330    | 6740   | 6200   | -1530 | 780   | -820  | H0 |
| ATOM 12532 HG21 VAL D 195  | -11.631 | 22.188 | 20.508 | 1.00  | 48.85 |       | H0 |
| ANISOU12532 HG21 VAL D 195 | 5490    | 6740   | 6320   | -1570 | 980   | -640  | H0 |
| ATOM 12533 HG22 VAL D 195  | -13.209 | 22.184 | 20.322 | 1.00  | 47.42 |       | H0 |
| ANISOU12533 HG22 VAL D 195 | 5500    | 6400   | 6110   | -1460 | 960   | -630  | H0 |
| ATOM 12534 HG23 VAL D 195  | -12.337 | 20.996 | 19.732 | 1.00  | 47.49 |       | H0 |
| ANISOU12534 HG23 VAL D 195 | 5400    | 6570   | 6080   | -1400 | 1020  | -580  | H0 |
| ATOM 12535 N GLU D 196     | -10.670 | 19.704 | 24.379 | 1.00  | 48.81 |       | N0 |
| ANISOU12535 N GLU D 196    | 5110    | 7240   | 6200   | -1300 | 730   | -780  | N0 |
| ATOM 12536 CA GLU D 196    | -10.667 | 19.195 | 25.771 | 1.00  | 50.01 |       | C0 |
| ANISOU12536 CA GLU D 196   | 5180    | 7530   | 6290   | -1220 | 630   | -820  | C0 |
| ATOM 12537 C GLU D 196     | -11.404 | 20.218 | 26.636 | 1.00  | 49.18 |       | C0 |
| ANISOU12537 C GLU D 196    | 5170    | 7340   | 6180   | -1310 | 560   | -920  | C0 |
| ATOM 12538 O GLU D 196     | -10.938 | 21.369 | 26.718 | 1.00  | 50.12 |       | O0 |
| ANISOU12538 O GLU D 196    | 5270    | 7440   | 6340   | -1480 | 550   | -1000 | O0 |
| ATOM 12539 CB GLU D 196    | -9.232  | 18.972 | 26.249 | 1.00  | 53.09 |       | C0 |
| ANISOU12539 CB GLU D 196   | 5340    | 8150   | 6680   | -1240 | 610   | -820  | C0 |
| ATOM 12540 CG GLU D 196    | -9.136  | 18.272 | 27.591 | 1.00  | 54.70 |       | C0 |
| ANISOU12540 CG GLU D 196   | 5460    | 8530   | 6800   | -1130 | 510   | -830  | C0 |
| ATOM 12541 CD GLU D 196    | -7.716  | 18.062 | 28.085 | 1.00  | 58.31 |       | C0 |
| ANISOU12541 CD GLU D 196   | 5660    | 9250   | 7240   | -1140 | 460   | -820  | C0 |
| ATOM 12542 OE1 GLU D 196   | -7.563  | 17.635 | 29.243 | 1.00  | 60.32 |       | O0 |
| ANISOU12542 OE1 GLU D 196  | 5830    | 9670   | 7420   | -1070 | 370   | -820  | O0 |
| ATOM 12543 OE2 GLU D 196   | -6.762  | 18.323 | 27.309 | 1.00  | 61.80 |       | O0 |
| ANISOU12543 OE2 GLU D 196  | 5990    | 9750   | 7740   | -1220 | 530   | -800  | O0 |
| ATOM 12544 H GLU D 196     | -10.066 | 20.373 | 24.246 | 1.00  | 49.92 |       | H0 |
| ANISOU12544 H GLU D 196    | 5190    | 7400   | 6380   | -1410 | 740   | -810  | H0 |
| ATOM 12545 HA GLU D 196    | -11.152 | 18.339 | 25.798 | 1.00  | 49.05 |       | H0 |
| ANISOU12545 HA GLU D 196   | 5100    | 7390   | 6140   | -1100 | 640   | -770  | H0 |
| ATOM 12546 HB2 GLU D 196   | -8.762  | 18.436 | 25.578 | 1.00  | 53.20 |       | H0 |
| ANISOU12546 HB2 GLU D 196  | 5310    | 8200   | 6710   | -1190 | 670   | -760  | H0 |
| ATOM 12547 HB3 GLU D 196   | -8.783  | 19.841 | 26.310 | 1.00  | 54.01 |       | H0 |
| ANISOU12547 HB3 GLU D 196  | 5410    | 8290   | 6820   | -1390 | 590   | -880  | H0 |
| ATOM 12548 HG2 GLU D 196   | -9.622  | 18.798 | 28.261 | 1.00  | 54.70 |       | H0 |
| ANISOU12548 HG2 GLU D 196  | 5510    | 8500   | 6780   | -1180 | 450   | -890  | H0 |
| ATOM 12549 HG3 GLU D 196   | -9.574  | 17.397 | 27.526 | 1.00  | 53.96 |       | H0 |
| ANISOU12549 HG3 GLU D 196  | 5410    | 8400   | 6680   | -1000 | 530   | -760  | H0 |
| ATOM 12550 N VAL D 197     | -12.527 | 19.806 | 27.221 | 1.00  | 47.33 |       | N0 |
| ANISOU12550 N VAL D 197    | 5030    | 7060   | 5890   | -1200 | 530   | -920  | N0 |
| ATOM 12551 CA VAL D 197    | -13.431 | 20.675 | 28.024 | 1.00  | 47.17 |       | C0 |
| ANISOU12551 CA VAL D 197   | 5120    | 6960   | 5840   | -1230 | 470   | -1010 | C0 |
| ATOM 12552 C VAL D 197     | -13.229 | 20.311 | 29.493 | 1.00  | 47.56 |       | C0 |
| ANISOU12552 C VAL D 197    | 5070    | 7200   | 5800   | -1190 | 380   | -1060 | C0 |
| ATOM 12553 O VAL D 197     | -13.532 | 19.165 | 29.856 | 1.00  | 47.64 |       | O0 |

|                            |         |        |        |       |       |       |    |
|----------------------------|---------|--------|--------|-------|-------|-------|----|
| ANISOU12553 O VAL D 197    | 5060    | 7280   | 5750   | -1040 | 370   | -980  | O0 |
| ATOM 12554 CB VAL D 197    | -14.895 | 20.513 | 27.577 | 1.00  | 45.66 |       | C0 |
| ANISOU12554 CB VAL D 197   | 5090    | 6610   | 5650   | -1140 | 510   | -970  | C0 |
| ATOM 12555 CG1 VAL D 197   | -15.829 | 21.400 | 28.384 | 1.00  | 46.07 |       | C0 |
| ANISOU12555 CG1 VAL D 197  | 5240    | 6590   | 5680   | -1150 | 470   | -1060 | C0 |
| ATOM 12556 CG2 VAL D 197   | -15.043 | 20.786 | 26.087 | 1.00  | 45.10 |       | C0 |
| ANISOU12556 CG2 VAL D 197  | 5100    | 6380   | 5650   | -1180 | 590   | -910  | C0 |
| ATOM 12557 H VAL D 197     | -12.818 | 18.944 | 27.166 | 1.00  | 46.80 |       | H0 |
| ANISOU12557 H VAL D 197    | 4980    | 7010   | 5800   | -1090 | 540   | -860  | H0 |
| ATOM 12558 HA VAL D 197    | -13.168 | 21.603 | 27.892 | 1.00  | 47.89 |       | H0 |
| ANISOU12558 HA VAL D 197   | 5230    | 6990   | 5980   | -1350 | 470   | -1070 | H0 |
| ATOM 12559 HB VAL D 197    | -15.154 | 19.573 | 27.741 | 1.00  | 45.07 |       | H0 |
| ANISOU12559 HB VAL D 197   | 5000    | 6590   | 5540   | -1040 | 500   | -910  | H0 |
| ATOM 12560 HG11 VAL D 197  | -15.919 | 21.044 | 29.285 | 1.00  | 46.12 |       | H0 |
| ANISOU12560 HG11 VAL D 197 | 5200    | 6700   | 5620   | -1100 | 420   | -1090 | H0 |
| ATOM 12561 HG12 VAL D 197  | -16.703 | 21.426 | 27.959 | 1.00  | 45.26 |       | H0 |
| ANISOU12561 HG12 VAL D 197 | 5230    | 6390   | 5590   | -1100 | 500   | -1030 | H0 |
| ATOM 12562 HG13 VAL D 197  | -15.464 | 22.301 | 28.428 | 1.00  | 46.89 |       | H0 |
| ANISOU12562 HG13 VAL D 197 | 5350    | 6650   | 5820   | -1250 | 460   | -1140 | H0 |
| ATOM 12563 HG21 VAL D 197  | -14.553 | 21.594 | 25.855 | 1.00  | 45.95 |       | H0 |
| ANISOU12563 HG21 VAL D 197 | 5200    | 6450   | 5800   | -1280 | 600   | -940  | H0 |
| ATOM 12564 HG22 VAL D 197  | -15.982 | 20.905 | 25.870 | 1.00  | 44.51 |       | H0 |
| ANISOU12564 HG22 VAL D 197 | 5130    | 6220   | 5570   | -1140 | 600   | -890  | H0 |
| ATOM 12565 HG23 VAL D 197  | -14.686 | 20.035 | 25.582 | 1.00  | 44.88 |       | H0 |
| ANISOU12565 HG23 VAL D 197 | 5030    | 6400   | 5620   | -1140 | 620   | -840  | H0 |
| ATOM 12566 N SER D 198     | -12.686 | 21.243 | 30.279 | 1.00  | 48.31 |       | N0 |
| ANISOU12566 N SER D 198    | 5120    | 7360   | 5880   | -1310 | 310   | -1190 | N0 |
| ATOM 12567 CA SER D 198    | -12.420 | 21.076 | 31.729 | 1.00  | 48.88 |       | C0 |
| ANISOU12567 CA SER D 198   | 5100    | 7640   | 5840   | -1290 | 210   | -1260 | C0 |
| ATOM 12568 C SER D 198     | -13.595 | 21.658 | 32.516 | 1.00  | 47.98 |       | C0 |
| ANISOU12568 C SER D 198    | 5120    | 7440   | 5660   | -1260 | 190   | -1350 | C0 |
| ATOM 12569 O SER D 198     | -13.718 | 22.892 | 32.575 | 1.00  | 48.68 |       | O0 |
| ANISOU12569 O SER D 198    | 5300    | 7410   | 5790   | -1380 | 180   | -1490 | O0 |
| ATOM 12570 CB SER D 198    | -11.116 | 21.711 | 32.124 | 1.00  | 50.92 |       | C0 |
| ANISOU12570 CB SER D 198   | 5210    | 8050   | 6100   | -1450 | 150   | -1350 | C0 |
| ATOM 12571 OG SER D 198    | -10.025 | 21.031 | 31.524 | 1.00  | 51.46 |       | O0 |
| ANISOU12571 OG SER D 198   | 5110    | 8240   | 6200   | -1440 | 170   | -1250 | O0 |
| ATOM 12572 H SER D 198     | -12.436 | 22.065 | 29.976 | 1.00  | 49.00 |       | H0 |
| ANISOU12572 H SER D 198    | 5230    | 7370   | 6020   | -1430 | 330   | -1250 | H0 |
| ATOM 12573 HA SER D 198    | -12.365 | 20.102 | 31.924 | 1.00  | 48.44 |       | H0 |
| ANISOU12573 HA SER D 198   | 4980    | 7680   | 5740   | -1170 | 210   | -1170 | H0 |
| ATOM 12574 HB2 SER D 198   | -11.112 | 22.652 | 31.841 | 1.00  | 51.48 |       | H0 |
| ANISOU12574 HB2 SER D 198  | 5340    | 7990   | 6230   | -1580 | 160   | -1430 | H0 |
| ATOM 12575 HB3 SER D 198   | -11.022 | 21.684 | 33.103 | 1.00  | 51.75 |       | H0 |
| ANISOU12575 HB3 SER D 198  | 5260    | 8290   | 6110   | -1440 | 70    | -1410 | H0 |
| ATOM 12576 N LEU D 199     | -14.438 | 20.785 | 33.064 | 1.00  | 46.77 |       | N0 |
| ANISOU12576 N LEU D 199    | 5000    | 7350   | 5420   | -1110 | 190   | -1280 | N0 |
| ATOM 12577 CA LEU D 199    | -15.587 | 21.156 | 33.928 | 1.00  | 46.40 |       | C0 |
| ANISOU12577 CA LEU D 199   | 5060    | 7280   | 5290   | -1050 | 170   | -1360 | C0 |
| ATOM 12578 C LEU D 199     | -15.117 | 21.148 | 35.386 | 1.00  | 47.26 |       | C0 |
| ANISOU12578 C LEU D 199    | 5080    | 7620   | 5250   | -1050 | 80    | -1440 | C0 |
| ATOM 12579 O LEU D 199     | -14.893 | 20.047 | 35.922 | 1.00  | 46.46 |       | O0 |
| ANISOU12579 O LEU D 199    | 4880    | 7710   | 5070   | -950  | 50    | -1330 | O0 |
| ATOM 12580 CB LEU D 199    | -16.723 | 20.156 | 33.692 | 1.00  | 45.27 |       | C0 |

|             |       |      |     |     |      |         |        |        |      |       |    |
|-------------|-------|------|-----|-----|------|---------|--------|--------|------|-------|----|
| ANISOU12580 | CB    | LEU  | D   | 199 | 4980 | 7090    | 5130   | -900   | 230  | -1220 | C0 |
| ATOM        | 12581 | CG   | LEU | D   | 199  | -18.000 | 20.395 | 34.497 | 1.00 | 45.66 | C0 |
| ANISOU12581 | CG    | LEU  | D   | 199 | 5110 | 7140    | 5100   | -820   | 230  | -1260 | C0 |
| ATOM        | 12582 | CD1  | LEU | D   | 199  | -18.562 | 21.786 | 34.238 | 1.00 | 46.44 | C0 |
| ANISOU12582 | CD1   | LEU  | D   | 199 | 5330 | 7060    | 5250   | -880   | 260  | -1390 | C0 |
| ATOM        | 12583 | CD2  | LEU | D   | 199  | -19.034 | 19.334 | 34.172 | 1.00 | 44.45 | C0 |
| ANISOU12583 | CD2   | LEU  | D   | 199 | 4990 | 6950    | 4940   | -710   | 290  | -1100 | C0 |
| ATOM        | 12584 | H    | LEU | D   | 199  | -14.354 | 19.886 | 32.940 | 1.00 | 46.23 | H0 |
| ANISOU12584 | H     | LEU  | D   | 199 | 4890 | 7340    | 5340   | -1020  | 200  | -1180 | H0 |
| ATOM        | 12585 | HA   | LEU | D   | 199  | -15.885 | 22.064 | 33.688 | 1.00 | 46.64 | H0 |
| ANISOU12585 | HA    | LEU  | D   | 199 | 5180 | 7170    | 5370   | -1110  | 190  | -1440 | H0 |
| ATOM        | 12586 | HB2  | LEU | D   | 199  | -16.950 | 20.171 | 32.741 | 1.00 | 44.44 | H0 |
| ANISOU12586 | HB2   | LEU  | D   | 199 | 4920 | 6850    | 5110   | -910   | 280  | -1170 | H0 |
| ATOM        | 12587 | HB3  | LEU | D   | 199  | -16.391 | 19.260 | 33.900 | 1.00 | 45.18 | H0 |
| ANISOU12587 | HB3   | LEU  | D   | 199 | 4890 | 7190    | 5080   | -840   | 210  | -1130 | H0 |
| ATOM        | 12588 | HG   | LEU | D   | 199  | -17.780 | 20.326 | 35.458 | 1.00 | 46.56 | H0 |
| ANISOU12588 | HG    | LEU  | D   | 199 | 5180 | 7400    | 5110   | -810   | 180  | -1300 | H0 |
| ATOM        | 12589 | HD11 | LEU | D   | 199  | -18.010 | 22.449 | 34.690 | 1.00 | 47.46 | H0 |
| ANISOU12589 | HD11  | LEU  | D   | 199 | 5450 | 7220    | 5360   | -960   | 220  | -1510 | H0 |
| ATOM        | 12590 | HD12 | LEU | D   | 199  | -19.472 | 21.838 | 34.577 | 1.00 | 46.16 | H0 |
| ANISOU12590 | HD12  | LEU  | D   | 199 | 5350 | 7010    | 5170   | -810   | 280  | -1400 | H0 |
| ATOM        | 12591 | HD13 | LEU | D   | 199  | -18.562 | 21.963 | 33.281 | 1.00 | 45.72 | H0 |
| ANISOU12591 | HD13  | LEU  | D   | 199 | 5280 | 6830    | 5260   | -910   | 300  | -1360 | H0 |
| ATOM        | 12592 | HD21 | LEU | D   | 199  | -19.235 | 19.356 | 33.221 | 1.00 | 43.62 | H0 |
| ANISOU12592 | HD21  | LEU  | D   | 199 | 4930 | 6720    | 4920   | -720   | 330  | -1060 | H0 |
| ATOM        | 12593 | HD22 | LEU | D   | 199  | -19.847 | 19.507 | 34.678 | 1.00 | 44.50 | H0 |
| ANISOU12593 | HD22  | LEU  | D   | 199 | 5040 | 6980    | 4890   | -660   | 300  | -1130 | H0 |
| ATOM        | 12594 | HD23 | LEU | D   | 199  | -18.686 | 18.457 | 34.410 | 1.00 | 44.38 | H0 |
| ANISOU12594 | HD23  | LEU  | D   | 199 | 4920 | 7040    | 4900   | -670   | 270  | -1020 | H0 |
| ATOM        | 12595 | N    | ASN | D   | 200  | -14.938 | 22.335 | 35.975 | 1.00 | 48.64 | N0 |
| ANISOU12595 | N     | ASN  | D   | 200 | 5290 | 7790    | 5400   | -1170  | 30   | -1630 | N0 |
| ATOM        | 12596 | CA   | ASN | D   | 200  | -14.607 | 22.530 | 37.414 | 1.00 | 50.17 | C0 |
| ANISOU12596 | CA    | ASN  | D   | 200 | 5420 | 8210    | 5430   | -1180  | -70  | -1760 | C0 |
| ATOM        | 12597 | C    | ASN | D   | 200  | -15.927 | 22.746 | 38.163 | 1.00 | 50.04 | C0 |
| ANISOU12597 | C     | ASN  | D   | 200 | 5530 | 8170    | 5310   | -1080  | -40  | -1820 | C0 |
| ATOM        | 12598 | O    | ASN | D   | 200  | -16.547 | 23.811 | 37.969 | 1.00 | 50.18 | O0 |
| ANISOU12598 | O     | ASN  | D   | 200 | 5690 | 7990    | 5380   | -1120  | 0    | -1940 | O0 |
| ATOM        | 12599 | CB   | ASN | D   | 200  | -13.603 | 23.674 | 37.605 | 1.00 | 52.05 | C0 |
| ANISOU12599 | CB    | ASN  | D   | 200 | 5620 | 8460    | 5690   | -1390  | -140 | -1950 | C0 |
| ATOM        | 12600 | CG   | ASN | D   | 200  | -13.022 | 23.765 | 39.003 | 1.00 | 53.97 | C0 |
| ANISOU12600 | CG    | ASN  | D   | 200 | 5770 | 8990    | 5750   | -1430  | -260 | -2080 | C0 |
| ATOM        | 12601 | OD1  | ASN | D   | 200  | -12.813 | 22.758 | 39.676 | 1.00 | 53.82 | O0 |
| ANISOU12601 | OD1   | ASN  | D   | 200 | 5630 | 9220    | 5600   | -1320  | -310 | -1970 | O0 |
| ATOM        | 12602 | ND2  | ASN | D   | 200  | -12.734 | 24.977 | 39.444 | 1.00 | 55.64 | N0 |
| ANISOU12602 | ND2   | ASN  | D   | 200 | 6030 | 9160    | 5950   | -1600  | -310 | -2310 | N0 |
| ATOM        | 12603 | H    | ASN | D   | 200  | -15.009 | 23.118 | 35.516 | 1.00 | 48.76 | H0 |
| ANISOU12603 | H     | ASN  | D   | 200 | 5370 | 7660    | 5490   | -1250  | 50   | -1700 | H0 |
| ATOM        | 12604 | HA   | ASN | D   | 200  | -14.186 | 21.706 | 37.747 | 1.00 | 50.28 | H0 |
| ANISOU12604 | HA    | ASN  | D   | 200 | 5320 | 8400    | 5380   | -1120  | -110 | -1670 | H0 |
| ATOM        | 12605 | HB2  | ASN | D   | 200  | -12.870 | 23.555 | 36.967 | 1.00 | 51.98 | H0 |
| ANISOU12605 | HB2   | ASN  | D   | 200 | 5530 | 8450    | 5770   | -1460  | -140 | -1890 | H0 |
| ATOM        | 12606 | HB3  | ASN | D   | 200  | -14.049 | 24.520 | 37.394 | 1.00 | 52.20 | H0 |
| ANISOU12606 | HB3   | ASN  | D   | 200 | 5760 | 8300    | 5770   | -1450  | -110 | -2050 | H0 |
| ATOM        | 12607 | HD21 | ASN | D   | 200  | -12.765 | 25.152 | 40.310 | 1.00 | 56.91 | H0 |



|             |      |           |         |        |        |       |       |       |    |
|-------------|------|-----------|---------|--------|--------|-------|-------|-------|----|
| ANISOU12607 | HD21 | ASN D 200 | 6190    | 9440   | 5990   | -1600 | -370  | -2410 | H0 |
| ATOM 12608  | HD22 | ASN D 200 | -12.509 | 25.614 | 38.873 | 1.00  | 55.98 |       | H0 |
| ANISOU12608 | HD22 | ASN D 200 | 6120    | 9050   | 6110   | -1710 | -290  | -2360 | H0 |
| ATOM 12609  | N    | PHE D 201 | -16.357 | 21.761 | 38.956 | 1.00  | 49.82 |       | N0 |
| ANISOU12609 | N    | PHE D 201 | 5460    | 8330   | 5140   | -930  | -60   | -1710 | N0 |
| ATOM 12610  | CA   | PHE D 201 | -17.684 | 21.742 | 39.625 | 1.00  | 50.20 |       | C0 |
| ANISOU12610 | CA   | PHE D 201 | 5600    | 8390   | 5090   | -810  | -10   | -1720 | C0 |
| ATOM 12611  | C    | PHE D 201 | -17.548 | 21.174 | 41.040 | 1.00  | 52.29 |       | C0 |
| ANISOU12611 | C    | PHE D 201 | 5790    | 8950   | 5130   | -740  | -80   | -1720 | C0 |
| ATOM 12612  | O    | PHE D 201 | -16.540 | 20.511 | 41.339 | 1.00  | 53.71 |       | O0 |
| ANISOU12612 | O    | PHE D 201 | 5830    | 9320   | 5250   | -750  | -150  | -1640 | O0 |
| ATOM 12613  | CB   | PHE D 201 | -18.687 | 20.935 | 38.794 | 1.00  | 48.08 |       | C0 |
| ANISOU12613 | CB   | PHE D 201 | 5380    | 7990   | 4900   | -700  | 90    | -1530 | C0 |
| ATOM 12614  | CG   | PHE D 201 | -18.440 | 19.447 | 38.769 | 1.00  | 47.03 |       | C0 |
| ANISOU12614 | CG   | PHE D 201 | 5150    | 7970   | 4750   | -620  | 80    | -1320 | C0 |
| ATOM 12615  | CD1  | PHE D 201 | -17.469 | 18.903 | 37.943 | 1.00  | 46.73 |       | C0 |
| ANISOU12615 | CD1  | PHE D 201 | 5040    | 7900   | 4810   | -660  | 70    | -1230 | C0 |
| ATOM 12616  | CD2  | PHE D 201 | -19.181 | 18.589 | 39.566 | 1.00  | 47.32 |       | C0 |
| ANISOU12616 | CD2  | PHE D 201 | 5180    | 8150   | 4650   | -500  | 100   | -1200 | C0 |
| ATOM 12617  | CE1  | PHE D 201 | -17.246 | 17.535 | 37.916 | 1.00  | 46.25 |       | C0 |
| ANISOU12617 | CE1  | PHE D 201 | 4910    | 7920   | 4740   | -560  | 80    | -1030 | C0 |
| ATOM 12618  | CE2  | PHE D 201 | -18.953 | 17.221 | 39.542 | 1.00  | 46.73 |       | C0 |
| ANISOU12618 | CE2  | PHE D 201 | 5040    | 8150   | 4570   | -430  | 110   | -1000 | C0 |
| ATOM 12619  | CZ   | PHE D 201 | -17.989 | 16.696 | 38.714 | 1.00  | 46.30 |       | C0 |
| ANISOU12619 | CZ   | PHE D 201 | 4930    | 8040   | 4630   | -450  | 100   | -920  | C0 |
| ATOM 12620  | H    | PHE D 201 | -15.862 | 21.019 | 39.143 | 1.00  | 50.01 |       | H0 |
| ANISOU12620 | H    | PHE D 201 | 5390    | 8490   | 5120   | -900  | -90   | -1620 | H0 |
| ATOM 12621  | HA   | PHE D 201 | -18.013 | 22.673 | 39.696 | 1.00  | 50.81 |       | H0 |
| ANISOU12621 | HA   | PHE D 201 | 5770    | 8360   | 5180   | -850  | 0     | -1860 | H0 |
| ATOM 12622  | HB2  | PHE D 201 | -19.585 | 21.099 | 39.152 | 1.00  | 48.05 |       | H0 |
| ANISOU12622 | HB2  | PHE D 201 | 5440    | 7970   | 4850   | -640  | 120   | -1560 | H0 |
| ATOM 12623  | HB3  | PHE D 201 | -18.667 | 21.273 | 37.875 | 1.00  | 47.31 |       | H0 |
| ANISOU12623 | HB3  | PHE D 201 | 5320    | 7720   | 4930   | -750  | 120   | -1530 | H0 |
| ATOM 12624  | HD1  | PHE D 201 | -16.957 | 19.471 | 37.392 | 1.00  | 46.73 |       | H0 |
| ANISOU12624 | HD1  | PHE D 201 | 5040    | 7820   | 4900   | -740  | 70    | -1290 | H0 |
| ATOM 12625  | HD2  | PHE D 201 | -19.846 | 18.942 | 40.136 | 1.00  | 47.70 |       | H0 |
| ANISOU12625 | HD2  | PHE D 201 | 5270    | 8230   | 4620   | -470  | 120   | -1260 | H0 |
| ATOM 12626  | HE1  | PHE D 201 | -16.580 | 17.179 | 37.350 | 1.00  | 46.04 |       | H0 |
| ANISOU12626 | HE1  | PHE D 201 | 4840    | 7870   | 4780   | -570  | 80    | -980  | H0 |
| ATOM 12627  | HE2  | PHE D 201 | -19.465 | 16.650 | 40.091 | 1.00  | 47.00 |       | H0 |
| ANISOU12627 | HE2  | PHE D 201 | 5070    | 8260   | 4520   | -360  | 120   | -910  | H0 |
| ATOM 12628  | HZ   | PHE D 201 | -17.833 | 15.765 | 38.698 | 1.00  | 46.17 |       | H0 |
| ANISOU12628 | HZ   | PHE D 201 | 4880    | 8050   | 4610   | -390  | 100   | -780  | H0 |
| ATOM 12629  | N    | ARG D 202 | -18.543 | 21.440 | 41.887 | 1.00  | 53.84 |       | N0 |
| ANISOU12629 | N    | ARG D 202 | 6060    | 9210   | 5190   | -660  | -50   | -1780 | N0 |
| ATOM 12630  | CA   | ARG D 202 | -18.588 | 20.942 | 43.286 | 1.00  | 55.77 |       | C0 |
| ANISOU12630 | CA   | ARG D 202 | 6240    | 9750   | 5190   | -580  | -100  | -1770 | C0 |
| ATOM 12631  | C    | ARG D 202 | -20.039 | 20.898 | 43.781 | 1.00  | 55.82 |       | C0 |
| ANISOU12631 | C    | ARG D 202 | 6330    | 9770   | 5100   | -450  | -10   | -1750 | C0 |
| ATOM 12632  | O    | ARG D 202 | -20.880 | 21.655 | 43.252 | 1.00  | 54.10 |       | O0 |
| ANISOU12632 | O    | ARG D 202 | 6230    | 9340   | 4990   | -440  | 70    | -1840 | O0 |
| ATOM 12633  | CB   | ARG D 202 | -17.724 | 21.823 | 44.195 | 1.00  | 58.74 |       | C0 |
| ANISOU12633 | CB   | ARG D 202 | 6590    | 10290  | 5430   | -680  | -210  | -2010 | C0 |
| ATOM 12634  | CG   | ARG D 202 | -18.319 | 23.193 | 44.489 | 1.00  | 60.25 |       | C0 |

|             |      |           |         |        |        |       |       |       |    |
|-------------|------|-----------|---------|--------|--------|-------|-------|-------|----|
| ANISOU12634 | CG   | ARG D 202 | 6930    | 10360  | 5600   | -730  | -180  | -2270 | C0 |
| ATOM 12635  | CD   | ARG D 202 | -17.512 | 24.007 | 45.484 | 1.00  | 63.46 |       | C0 |
| ANISOU12635 | CD   | ARG D 202 | 7330    | 10930  | 5850   | -840  | -300  | -2520 | C0 |
| ATOM 12636  | NE   | ARG D 202 | -18.130 | 25.314 | 45.671 | 1.00  | 65.11 |       | N0 |
| ANISOU12636 | NE   | ARG D 202 | 7710    | 10960  | 6070   | -870  | -250  | -2780 | N0 |
| ATOM 12637  | CZ   | ARG D 202 | -17.524 | 26.400 | 46.144 | 1.00  | 68.01 |       | C0 |
| ANISOU12637 | CZ   | ARG D 202 | 8130    | 11320  | 6390   | -1020 | -330  | -3060 | C0 |
| ATOM 12638  | NH1  | ARG D 202 | -16.251 | 26.365 | 46.500 | 1.00  | 69.38 |       | N0 |
| ANISOU12638 | NH1  | ARG D 202 | 8180    | 11690  | 6500   | -1170 | -470  | -3120 | N0 |
| ATOM 12639  | NH2  | ARG D 202 | -18.204 | 27.528 | 46.260 | 1.00  | 69.51 |       | N0 |
| ANISOU12639 | NH2  | ARG D 202 | 8510    | 11310  | 6590   | -1020 | -270  | -3280 | N0 |
| ATOM 12640  | H    | ARG D 202 | -19.260 | 21.953 | 41.655 | 1.00  | 53.41 |       | H0 |
| ANISOU12640 | H    | ARG D 202 | 6090    | 9020   | 5180   | -640  | 10    | -1840 | H0 |
| ATOM 12641  | HA   | ARG D 202 | -18.228 | 20.028 | 43.296 | 1.00  | 55.47 |       | H0 |
| ANISOU12641 | HA   | ARG D 202 | 6120    | 9820   | 5140   | -530  | -120  | -1610 | H0 |
| ATOM 12642  | HB2  | ARG D 202 | -17.584 | 21.353 | 45.043 | 1.00  | 59.66 |       | H0 |
| ANISOU12642 | HB2  | ARG D 202 | 6650    | 10630  | 5390   | -630  | -250  | -1970 | H0 |
| ATOM 12643  | HB3  | ARG D 202 | -16.849 | 21.944 | 43.772 | 1.00  | 58.78 |       | H0 |
| ANISOU12643 | HB3  | ARG D 202 | 6540    | 10270  | 5520   | -780  | -260  | -2020 | H0 |
| ATOM 12644  | HG2  | ARG D 202 | -18.386 | 23.698 | 43.651 | 1.00  | 59.51 |       | H0 |
| ANISOU12644 | HG2  | ARG D 202 | 6900    | 10040  | 5670   | -780  | -140  | -2300 | H0 |
| ATOM 12645  | HG3  | ARG D 202 | -19.227 | 23.082 | 44.841 | 1.00  | 60.17 |       | H0 |
| ANISOU12645 | HG3  | ARG D 202 | 6970    | 10370  | 5520   | -620  | -120  | -2250 | H0 |
| ATOM 12646  | HD2  | ARG D 202 | -17.472 | 23.534 | 46.343 | 1.00  | 64.35 |       | H0 |
| ANISOU12646 | HD2  | ARG D 202 | 7380    | 11280  | 5790   | -780  | -340  | -2490 | H0 |
| ATOM 12647  | HD3  | ARG D 202 | -16.597 | 24.117 | 45.149 | 1.00  | 63.72 |       | H0 |
| ANISOU12647 | HD3  | ARG D 202 | 7290    | 10960  | 5960   | -960  | -360  | -2540 | H0 |
| ATOM 12648  | HE   | ARG D 202 | -18.971 | 25.393 | 45.451 | 1.00  | 64.41 |       | H0 |
| ANISOU12648 | HE   | ARG D 202 | 7700    | 10760  | 6020   | -780  | -170  | -2750 | H0 |
| ATOM 12649  | HH11 | ARG D 202 | -15.793 | 25.624 | 46.425 | 1.00  | 68.81 |       | H0 |
| ANISOU12649 | HH11 | ARG D 202 | 7980    | 11750  | 6410   | -1160 | -500  | -2970 | H0 |
| ATOM 12650  | HH12 | ARG D 202 | -15.864 | 27.090 | 46.811 | 1.00  | 71.08 |       | H0 |
| ANISOU12650 | HH12 | ARG D 202 | 8430    | 11890  | 6680   | -1290 | -520  | -3310 | H0 |
| ATOM 12651  | HH21 | ARG D 202 | -19.053 | 27.557 | 46.026 | 1.00  | 68.49 |       | H0 |
| ANISOU12651 | HH21 | ARG D 202 | 8450    | 11070  | 6510   | -910  | -180  | -3230 | H0 |
| ATOM 12652  | HH22 | ARG D 202 | -17.808 | 28.250 | 46.574 | 1.00  | 71.04 |       | H0 |
| ANISOU12652 | HH22 | ARG D 202 | 8750    | 11480  | 6760   | -1120 | -320  | -3470 | H0 |
| ATOM 12653  | N    | LYS D 203 | -20.299 | 20.053 | 44.784 | 1.00  | 57.68 |       | N0 |
| ANISOU12653 | N    | LYS D 203 | 6510    | 10260  | 5150   | -350  | -10   | -1640 | N0 |
| ATOM 12654  | CA   | LYS D 203 | -21.577 | 19.999 | 45.542 | 1.00  | 59.01 |       | C0 |
| ANISOU12654 | CA   | LYS D 203 | 6730    | 10520  | 5170   | -230  | 70    | -1620 | C0 |
| ATOM 12655  | C    | LYS D 203 | -21.831 | 21.357 | 46.205 | 1.00  | 61.08 |       | C0 |
| ANISOU12655 | C    | LYS D 203 | 7080    | 10800  | 5330   | -250  | 70    | -1910 | C0 |
| ATOM 12656  | O    | LYS D 203 | -20.849 | 22.025 | 46.574 | 1.00  | 61.83 |       | O0 |
| ANISOU12656 | O    | LYS D 203 | 7170    | 10950  | 5370   | -350  | -30   | -2100 | O0 |
| ATOM 12657  | CB   | LYS D 203 | -21.529 | 18.881 | 46.588 | 1.00  | 60.55 |       | C0 |
| ANISOU12657 | CB   | LYS D 203 | 6840    | 11010  | 5150   | -140  | 50    | -1440 | C0 |
| ATOM 12658  | CG   | LYS D 203 | -21.466 | 17.475 | 46.006 | 1.00  | 60.07 |       | C0 |
| ANISOU12658 | CG   | LYS D 203 | 6720    | 10910  | 5200   | -100  | 80    | -1140 | C0 |
| ATOM 12659  | CD   | LYS D 203 | -21.368 | 16.379 | 47.038 | 1.00  | 61.90 |       | C0 |
| ANISOU12659 | CD   | LYS D 203 | 6880    | 11410  | 5230   | -10   | 60    | -950  | C0 |
| ATOM 12660  | CE   | LYS D 203 | -21.469 | 14.999 | 46.419 | 1.00  | 61.15 |       | C0 |
| ANISOU12660 | CE   | LYS D 203 | 6770    | 11210  | 5260   | 30    | 110   | -650  | C0 |
| ATOM 12661  | NZ   | LYS D 203 | -21.473 | 13.938 | 47.455 | 1.00  | 63.14 |       | N0 |

|             |     |           |         |        |        |      |       |       |    |
|-------------|-----|-----------|---------|--------|--------|------|-------|-------|----|
| ANISOU12661 | NZ  | LYS D 203 | 6970    | 11700  | 5320   | 130  | 100   | -440  | N0 |
| ATOM 12662  | H   | LYS D 203 | -19.681 | 19.450 | 45.074 | 1.00 | 57.99 |       | H0 |
| ANISOU12662 | H   | LYS D 203 | 6470    | 10430  | 5130   | -340 | -60   | -1550 | H0 |
| ATOM 12663  | HA  | LYS D 203 | -22.308 | 19.812 | 44.908 | 1.00 | 57.75 |       | H0 |
| ANISOU12663 | HA  | LYS D 203 | 6600    | 10220  | 5120   | -200 | 150   | -1540 | H0 |
| ATOM 12664  | HB2 | LYS D 203 | -20.743 | 19.020 | 47.157 | 1.00 | 61.91 |       | H0 |
| ANISOU12664 | HB2 | LYS D 203 | 6970    | 11340  | 5220   | -170 | -30   | -1510 | H0 |
| ATOM 12665  | HB3 | LYS D 203 | -22.325 | 18.949 | 47.155 | 1.00 | 61.27 |       | H0 |
| ANISOU12665 | HB3 | LYS D 203 | 6960    | 11190  | 5130   | -70  | 110   | -1450 | H0 |
| ATOM 12666  | HG2 | LYS D 203 | -22.268 | 17.326 | 45.462 | 1.00 | 58.84 |       | H0 |
| ANISOU12666 | HG2 | LYS D 203 | 6610    | 10610  | 5140   | -80  | 160   | -1080 | H0 |
| ATOM 12667  | HG3 | LYS D 203 | -20.689 | 17.417 | 45.410 | 1.00 | 59.38 |       | H0 |
| ANISOU12667 | HG3 | LYS D 203 | 6600    | 10740  | 5220   | -160 | 30    | -1140 | H0 |
| ATOM 12668  | HD2 | LYS D 203 | -20.512 | 16.455 | 47.510 | 1.00 | 63.00 |       | H0 |
| ANISOU12668 | HD2 | LYS D 203 | 6970    | 11690  | 5270   | -30  | -30   | -990  | H0 |
| ATOM 12669  | HD3 | LYS D 203 | -22.089 | 16.488 | 47.694 | 1.00 | 62.68 |       | H0 |
| ANISOU12669 | HD3 | LYS D 203 | 7000    | 11610  | 5200   | 40   | 110   | -960  | H0 |
| ATOM 12670  | HE2 | LYS D 203 | -22.290 | 14.935 | 45.896 | 1.00 | 60.09 |       | H0 |
| ANISOU12670 | HE2 | LYS D 203 | 6680    | 10930  | 5220   | 30   | 190   | -620  | H0 |
| ATOM 12671  | HE3 | LYS D 203 | -20.714 | 14.854 | 45.818 | 1.00 | 60.54 |       | H0 |
| ANISOU12671 | HE3 | LYS D 203 | 6660    | 11050  | 5290   | 0    | 60    | -640  | H0 |
| ATOM 12672  | HZ1 | LYS D 203 | -20.703 | 13.972 | 47.933 | 1.00 | 64.05 |       | H0 |
| ANISOU12672 | HZ1 | LYS D 203 | 7040    | 11960  | 5340   | 140  | 20    | -460  | H0 |
| ATOM 12673  | HZ2 | LYS D 203 | -21.542 | 13.124 | 47.060 | 1.00 | 62.33 |       | H0 |
| ANISOU12673 | HZ2 | LYS D 203 | 6870    | 11510  | 5300   | 150  | 140   | -270  | H0 |
| ATOM 12674  | HZ3 | LYS D 203 | -22.176 | 14.058 | 48.015 | 1.00 | 63.62 |       | H0 |
| ANISOU12674 | HZ3 | LYS D 203 | 7050    | 11860  | 5270   | 160  | 150   | -440  | H0 |
| ATOM 12675  | N   | LYS D 204 | -23.105 | 21.745 | 46.315 | 1.00 | 62.10 |       | N0 |
| ANISOU12675 | N   | LYS D 204 | 7290    | 10870  | 5440   | -150 | 180   | -1950 | N0 |
| ATOM 12676  | CA  | LYS D 204 | -23.579 | 22.912 | 47.108 | 1.00 | 65.45 |       | C0 |
| ANISOU12676 | CA  | LYS D 204 | 7810    | 11330  | 5730   | -110 | 200   | -2220 | C0 |
| ATOM 12677  | C   | LYS D 204 | -23.900 | 22.431 | 48.530 | 1.00 | 68.08 |       | C0 |
| ANISOU12677 | C   | LYS D 204 | 8100    | 12010  | 5760   | -10  | 210   | -2200 | C0 |
| ATOM 12678  | O   | LYS D 204 | -24.422 | 21.304 | 48.663 | 1.00 | 67.66 |       | O0 |
| ANISOU12678 | O   | LYS D 204 | 7970    | 12090  | 5650   | 70   | 260   | -1940 | O0 |
| ATOM 12679  | CB  | LYS D 204 | -24.808 | 23.541 | 46.439 | 1.00 | 65.20 |       | C0 |
| ANISOU12679 | CB  | LYS D 204 | 7880    | 11070  | 5830   | -30  | 330   | -2260 | C0 |
| ATOM 12680  | CG  | LYS D 204 | -24.545 | 24.237 | 45.109 | 1.00 | 63.71 |       | C0 |
| ANISOU12680 | CG  | LYS D 204 | 7760    | 10530  | 5910   | -120 | 330   | -2310 | C0 |
| ATOM 12681  | CD  | LYS D 204 | -25.651 | 24.056 | 44.090 | 1.00 | 62.17 |       | C0 |
| ANISOU12681 | CD  | LYS D 204 | 7580    | 10160  | 5880   | -40  | 430   | -2150 | C0 |
| ATOM 12682  | CE  | LYS D 204 | -26.967 | 24.686 | 44.495 | 1.00 | 63.81 |       | C0 |
| ANISOU12682 | CE  | LYS D 204 | 7840    | 10380  | 6030   | 120  | 540   | -2240 | C0 |
| ATOM 12683  | NZ  | LYS D 204 | -28.055 | 24.323 | 43.554 | 1.00 | 62.14 |       | N0 |
| ANISOU12683 | NZ  | LYS D 204 | 7600    | 10060  | 5950   | 200  | 630   | -2050 | N0 |
| ATOM 12684  | H   | LYS D 204 | -23.781 | 21.298 | 45.899 | 1.00 | 61.06 |       | H0 |
| ANISOU12684 | H   | LYS D 204 | 7150    | 10680  | 5370   | -100 | 250   | -1820 | H0 |
| ATOM 12685  | HA  | LYS D 204 | -22.857 | 23.581 | 47.150 | 1.00 | 66.28 |       | H0 |
| ANISOU12685 | HA  | LYS D 204 | 7950    | 11390  | 5840   | -200 | 130   | -2390 | H0 |
| ATOM 12686  | HB2 | LYS D 204 | -25.475 | 22.838 | 46.296 | 1.00 | 64.13 |       | H0 |
| ANISOU12686 | HB2 | LYS D 204 | 7690    | 10970  | 5700   | 40   | 390   | -2080 | H0 |
| ATOM 12687  | HB3 | LYS D 204 | -25.195 | 24.194 | 47.059 | 1.00 | 66.56 |       | H0 |
| ANISOU12687 | HB3 | LYS D 204 | 8110    | 11290  | 5890   | 30   | 360   | -2410 | H0 |
| ATOM 12688  | HG2 | LYS D 204 | -24.421 | 25.196 | 45.276 | 1.00 | 65.03 |       | H0 |

|             |               |         |        |         |       |        |       |    |
|-------------|---------------|---------|--------|---------|-------|--------|-------|----|
| ANISOU12688 | HG2 LYS D 204 | 8020    | 10610  | 6080    | -140  | 320    | -2510 | H0 |
| ATOM 12689  | HG3 LYS D 204 | -23.708 | 23.890 | 44.733  | 1.00  | 63.10  |       | H0 |
| ANISOU12689 | HG3 LYS D 204 | 7630    | 10440  | 5900    | -210  | 260    | -2250 | H0 |
| ATOM 12690  | HD2 LYS D 204 | -25.364 | 24.448 | 43.238  | 1.00  | 61.48  |       | H0 |
| ANISOU12690 | HD2 LYS D 204 | 7530    | 9870   | 5960    | -100  | 420    | -2170 | H0 |
| ATOM 12691  | HD3 LYS D 204 | -25.793 | 23.097 | 43.944  | 1.00  | 61.18  |       | H0 |
| ANISOU12691 | HD3 LYS D 204 | 7370    | 10120  | 5760    | -20   | 440    | -1960 | H0 |
| ATOM 12692  | HE2 LYS D 204 | -27.211 | 24.389 | 45.391  | 1.00  | 64.66  |       | H0 |
| ANISOU12692 | HE2 LYS D 204 | 7910    | 10690  | 5960    | 180   | 550    | -2240 | H0 |
| ATOM 12693  | HE3 LYS D 204 | -26.873 | 25.657 | 44.513  | 1.00  | 64.69  |       | H0 |
| ANISOU12693 | HE3 LYS D 204 | 8050    | 10360  | 6160    | 120   | 540    | -2420 | H0 |
| ATOM 12694  | HZ1 LYS D 204 | -27.839 | 24.594 | 42.715  | 1.00  | 61.31  |       | H0 |
| ANISOU12694 | HZ1 LYS D 204 | 7530    | 9770   | 6000    | 150   | 610    | -2050 | H0 |
| ATOM 12695  | HZ2 LYS D 204 | -28.827 | 24.727 | 43.807  | 1.00  | 63.00  |       | H0 |
| ANISOU12695 | HZ2 LYS D 204 | 7730    | 10180  | 6020    | 300   | 690    | -2110 | H0 |
| ATOM 12696  | HZ3 LYS D 204 | -28.175 | 23.424 | 43.554  | 1.00  | 61.37  |       | H0 |
| ANISOU12696 | HZ3 LYS D 204 | 7420    | 10060  | 5830    | 200   | 630    | -1890 | H0 |
| ATOM 12697  | N GLY D 205   | -23.590 | 23.246 | 49.544  | 1.00  | 71.08  |       | N0 |
| ANISOU12697 | N GLY D 205   | 8530    | 12540  | 5940    | -20   | 160    | -2450 | N0 |
| ATOM 12698  | CA GLY D 205  | -23.800 | 22.925 | 50.971  | 1.00  | 73.40  |       | C0 |
| ANISOU12698 | CA GLY D 205  | 8790    | 13200  | 5900    | 70    | 160    | -2470 | C0 |
| ATOM 12699  | C GLY D 205   | -22.682 | 22.058 | 51.526  | 1.00  | 74.25  |       | C0 |
| ANISOU12699 | C GLY D 205   | 8780    | 13570  | 5870    | 10    | 20     | -2340 | C0 |
| ATOM 12700  | O GLY D 205   | -21.570 | 21.978 | 50.971  | 1.00  | 73.95  |       | O0 |
| ANISOU12700 | O GLY D 205   | 8690    | 13450  | 5960    | -110  | -90    | -2330 | O0 |
| ATOM 12701  | H GLY D 205   | -23.222 | 24.067 | 49.405  | 1.00  | 71.60  |       | H0 |
| ANISOU12701 | H GLY D 205   | 8660    | 12490  | 6050    | -90   | 120    | -2640 | H0 |
| ATOM 12702  | HA2 GLY D 205 | -23.848 | 23.769 | 51.487  | 1.00  | 75.13  |       | H0 |
| ANISOU12702 | HA2 GLY D 205 | 9090    | 13440  | 6020    | 70    | 150    | -2700 | H0 |
| ATOM 12703  | HA3 GLY D 205 | -24.664 | 22.453 | 51.072  | 1.00  | 73.02  |       | H0 |
| ANISOU12703 | HA3 GLY D 205 | 8720    | 13200  | 5820    | 170   | 250    | -2330 | H0 |
| TER 12704   | GLY D 205     |         |        |         |       |        |       |    |
| ATOM 12705  | N ALA E 1     | -11.059 | 11.352 | -9.203  | 1.00  | 100.53 |       | N0 |
| ANISOU12705 | N ALA E 1     | 17550   | 11270  | 9370    | -2760 | 3200   | 910   | N0 |
| ATOM 12706  | CA ALA E 1    | -12.361 | 12.079 | -9.083  | 1.00  | 99.76  |       | C0 |
| ANISOU12706 | CA ALA E 1    | 17740   | 11000  | 9160    | -2540 | 2890   | 1010  | C0 |
| ATOM 12707  | C ALA E 1     | -12.506 | 12.660 | -7.671  | 1.00  | 97.77  |       | C0 |
| ANISOU12707 | C ALA E 1     | 17330   | 10690  | 9120    | -2450 | 2730   | 1000  | C0 |
| ATOM 12708  | O ALA E 1     | -11.689 | 12.302 | -6.798  | 1.00  | 96.97  |       | O0 |
| ANISOU12708 | O ALA E 1     | 16870   | 10720  | 9250    | -2530 | 2840   | 910   | O0 |
| ATOM 12709  | CB ALA E 1    | -13.502 | 11.149 | -9.416  | 1.00  | 98.22  |       | C0 |
| ANISOU12709 | CB ALA E 1    | 17500   | 10900  | 8920    | -2270 | 2710   | 980   | C0 |
| ATOM 12710  | H ALA E 1     | -11.204 | 10.452 | -9.192  | 1.00  | 99.14  |       | H0 |
| ANISOU12710 | H ALA E 1     | 17170   | 11230  | 9270    | -2660 | 3210   | 850   | H0 |
| ATOM 12711  | HA ALA E 1    | -12.361 | 12.825 | -9.728  | 1.00  | 101.71 |       | H0 |
| ANISOU12711 | HA ALA E 1    | 18330   | 11090  | 9220    | -2640 | 2910   | 1090  | H0 |
| ATOM 12712  | HB1 ALA E 1   | -14.324 | 11.660 | -9.494  | 1.00  | 98.37  |       | H0 |
| ANISOU12712 | HB1 ALA E 1   | 17730   | 10800  | 8840    | -2140 | 2520   | 1050  | H0 |
| ATOM 12713  | HB2 ALA E 1   | -13.321 | 10.699 | -10.258 | 1.00  | 99.07  |       | H0 |
| ANISOU12713 | HB2 ALA E 1   | 17680   | 11050  | 8910    | -2350 | 2830   | 970   | H0 |
| ATOM 12714  | HB3 ALA E 1   | -13.599 | 10.487 | -8.710  | 1.00  | 96.21  |       | H0 |
| ANISOU12714 | HB3 ALA E 1   | 16940   | 10770  | 8850    | -2160 | 2670   | 910   | H0 |
| ATOM 12715  | N ASP E 2     | -13.503 | 13.531 | -7.471  | 1.00  | 97.51  |       | N0 |
| ANISOU12715 | N ASP E 2     | 17570   | 10480  | 9000    | -2280 | 2480   | 1080  | N0 |

|             |     |      |   |         |        |        |       |        |      |    |
|-------------|-----|------|---|---------|--------|--------|-------|--------|------|----|
| ATOM 12716  | CA  | ASPE | 2 | -13.876 | 14.104 | -6.146 | 1.00  | 95.34  | C0   |    |
| ANISOU12716 | CA  | ASPE | 2 | 17190   | 10140  | 8900   | -2140 | 2290   | 1060 | C0 |
| ATOM 12717  | C   | ASPE | 2 | -14.295 | 12.950 | -5.229 | 1.00  | 90.92  | C0   |    |
| ANISOU12717 | C   | ASPE | 2 | 16170   | 9800   | 8570   | -1920 | 2200   | 950  | C0 |
| ATOM 12718  | O   | ASPE | 2 | -14.657 | 11.881 | -5.762 | 1.00  | 89.94  | O0   |    |
| ANISOU12718 | O   | ASPE | 2 | 15920   | 9830   | 8420   | -1830 | 2210   | 920  | O0 |
| ATOM 12719  | CB  | ASPE | 2 | -14.968 | 15.176 | -6.261 | 1.00  | 97.21  | C0   |    |
| ANISOU12719 | CB  | ASPE | 2 | 17820   | 10130  | 8980   | -1950 | 2050   | 1170 | C0 |
| ATOM 12720  | CG  | ASPE | 2 | -15.978 | 14.951 | -7.377 | 1.00  | 98.84  | C0   |    |
| ANISOU12720 | CG  | ASPE | 2 | 18270   | 10320  | 8960   | -1780 | 1910   | 1240 | C0 |
| ATOM 12721  | OD1 | ASPE | 2 | -15.643 | 15.257 | -8.542 | 1.00  | 101.78 | O0   |    |
| ANISOU12721 | OD1 | ASPE | 2 | 18970   | 10590  | 9100   | -1950 | 2030   | 1320 | O0 |
| ATOM 12722  | OD2 | ASPE | 2 | -17.087 | 14.467 | -7.078 | 1.00  | 97.54  | O0   |    |
| ANISOU12722 | OD2 | ASPE | 2 | 17970   | 10250  | 8840   | -1490 | 1700   | 1220 | O0 |
| ATOM 12723  | H   | ASPE | 2 | -14.015 | 13.836 | -8.157 | 1.00  | 98.51  | H0   |    |
| ANISOU12723 | H   | ASPE | 2 | 17970   | 10500  | 8950   | -2230 | 2410   | 1150 | H0 |
| ATOM 12724  | HA  | ASPE | 2 | -13.073 | 14.528 | -5.762 | 1.00  | 96.03  | H0   |    |
| ANISOU12724 | HA  | ASPE | 2 | 17240   | 10190  | 9060   | -2320 | 2410   | 1050 | H0 |
| ATOM 12725  | HB2 | ASPE | 2 | -15.457 | 15.222 | -5.414 | 1.00  | 95.88  | H0   |    |
| ANISOU12725 | HB2 | ASPE | 2 | 17520   | 9980   | 8930   | -1790 | 1900   | 1140 | H0 |
| ATOM 12726  | HB3 | ASPE | 2 | -14.540 | 16.044 | -6.410 | 1.00  | 99.02  | H0   |    |
| ANISOU12726 | HB3 | ASPE | 2 | 18300   | 10200  | 9130   | -2110 | 2100   | 1230 | H0 |
| ATOM 12727  | N   | ARGE | 3 | -14.244 | 13.157 | -3.909 | 1.00  | 87.75  | N0   |    |
| ANISOU12727 | N   | ARGE | 3 | 15550   | 9420   | 8370   | -1860 | 2120   | 900  | N0 |
| ATOM 12728  | CA  | ARGE | 3 | -14.539 | 12.108 | -2.890 | 1.00  | 84.10  | C0   |    |
| ANISOU12728 | CA  | ARGE | 3 | 14660   | 9160   | 8130   | -1690 | 2040   | 800  | C0 |
| ATOM 12729  | C   | ARGE | 3 | -15.973 | 11.595 | -3.083 | 1.00  | 80.96  | C0   |    |
| ANISOU12729 | C   | ARGE | 3 | 14270   | 8810   | 7670   | -1390 | 1830   | 810  | C0 |
| ATOM 12730  | O   | ARGE | 3 | -16.233 | 10.441 | -2.699 | 1.00  | 78.94  | O0   |    |
| ANISOU12730 | O   | ARGE | 3 | 13700   | 8750   | 7550   | -1270 | 1800   | 740  | O0 |
| ATOM 12731  | CB  | ARGE | 3 | -14.348 | 12.638 | -1.464 | 1.00  | 83.71  | C0   |    |
| ANISOU12731 | CB  | ARGE | 3 | 14460   | 9090   | 8260   | -1670 | 1960   | 760  | C0 |
| ATOM 12732  | CG  | ARGE | 3 | -12.939 | 13.128 | -1.155 | 1.00  | 85.28  | C0   |    |
| ANISOU12732 | CG  | ARGE | 3 | 14600   | 9270   | 8530   | -1980 | 2150   | 740  | C0 |
| ATOM 12733  | CD  | ARGE | 3 | -12.823 | 13.702 | 0.247  | 1.00  | 84.16  | C0   |    |
| ANISOU12733 | CD  | ARGE | 3 | 14350   | 9090   | 8540   | -1960 | 2050   | 700  | C0 |
| ATOM 12734  | NE  | ARGE | 3 | -12.421 | 12.691 | 1.218  | 1.00  | 81.68  | N0   |    |
| ANISOU12734 | NE  | ARGE | 3 | 13580   | 9000   | 8450   | -1930 | 2070   | 600  | N0 |
| ATOM 12735  | CZ  | ARGE | 3 | -11.197 | 12.544 | 1.727  | 1.00  | 81.85  | C0   |    |
| ANISOU12735 | CZ  | ARGE | 3 | 13350   | 9130   | 8620   | -2140 | 2210   | 550  | C0 |
| ATOM 12736  | NH1 | ARGE | 3 | -10.211 | 13.358 | 1.377  | 1.00  | 84.34  | N0   |    |
| ANISOU12736 | NH1 | ARGE | 3 | 13810   | 9360   | 8880   | -2430 | 2360   | 580  | N0 |
| ATOM 12737  | NH2 | ARGE | 3 | -10.967 | 11.577 | 2.601  | 1.00  | 79.11  | N0   |    |
| ANISOU12737 | NH2 | ARGE | 3 | 12610   | 8990   | 8460   | -2060 | 2190   | 470  | N0 |
| ATOM 12738  | H   | ARGE | 3 | -14.039 | 13.969 | -3.553 | 1.00  | 88.78  | H0   |    |
| ANISOU12738 | H   | ARGE | 3 | 15810   | 9430   | 8500   | -1930 | 2100   | 930  | H0 |
| ATOM 12739  | HA  | ARGE | 3 | -13.918 | 11.359 | -3.033 | 1.00  | 83.55  | H0   |    |
| ANISOU12739 | HA  | ARGE | 3 | 14390   | 9230   | 8130   | -1780 | 2180   | 750  | H0 |
| ATOM 12740  | HB2 | ARGE | 3 | -14.976 | 13.376 | -1.321 | 1.00  | 84.15  | H0   |    |
| ANISOU12740 | HB2 | ARGE | 3 | 14720   | 9010   | 8250   | -1570 | 1830   | 810  | H0 |
| ATOM 12741  | HB3 | ARGE | 3 | -14.577 | 11.924 | -0.834 | 1.00  | 81.91  | H0   |    |
| ANISOU12741 | HB3 | ARGE | 3 | 13960   | 9000   | 8160   | -1550 | 1910   | 700  | H0 |
| ATOM 12742  | HG2 | ARGE | 3 | -12.311 | 12.381 | -1.245 | 1.00  | 84.62  | H0   |    |
| ANISOU12742 | HG2 | ARGE | 3 | 14290   | 9330   | 8530   | -2060 | 2280   | 690  | H0 |

|             |      |       |   |         |        |        |       |       |      |    |
|-------------|------|-------|---|---------|--------|--------|-------|-------|------|----|
| ATOM 12743  | HG3  | ARG E | 3 | -12.684 | 13.818 | -1.803 | 1.00  | 86.95 | H0   |    |
| ANISOU12743 | HG3  | ARG E | 3 | 15080   | 9340   | 8610   | -2120 | 2220  | 800  | H0 |
| ATOM 12744  | HD2  | ARG E | 3 | -12.173 | 14.435 | 0.244  | 1.00  | 85.70 | H0   |    |
| ANISOU12744 | HD2  | ARG E | 3 | 14670   | 9180   | 8710   | -2160 | 2130  | 720  | H0 |
| ATOM 12745  | HD3  | ARG E | 3 | -13.691 | 14.075 | 0.514  | 1.00  | 83.81 | H0   |    |
| ANISOU12745 | HD3  | ARG E | 3 | 14430   | 8950   | 8460   | -1790 | 1890  | 720  | H0 |
| ATOM 12746  | HE   | ARG E | 3 | -13.032 | 12.128 | 1.484  | 1.00  | 80.26 | H0   |    |
| ANISOU12746 | HE   | ARG E | 3 | 13280   | 8900   | 8320   | -1750 | 1980  | 580  | H0 |
| ATOM 12747  | HH11 | ARG E | 3 | -10.348 | 14.000 | 0.797  | 1.00  | 85.58 | H0   |    |
| ANISOU12747 | HH11 | ARG E | 3 | 14250   | 9370   | 8900   | -2490 | 2370  | 630  | H0 |
| ATOM 12748  | HH12 | ARG E | 3 | -9.411  | 13.246 | 1.724  | 1.00  | 84.57 | H0   |    |
| ANISOU12748 | HH12 | ARG E | 3 | 13650   | 9470   | 9010   | -2570 | 2440  | 540  | H0 |
| ATOM 12749  | HH21 | ARG E | 3 | -11.620 | 11.038 | 2.841  | 1.00  | 77.91 | H0   |    |
| ANISOU12749 | HH21 | ARG E | 3 | 12370   | 8900   | 8340   | -1880 | 2100  | 460  | H0 |
| ATOM 12750  | HH22 | ARG E | 3 | -10.162 | 11.477 | 2.945  | 1.00  | 79.72 | H0   |    |
| ANISOU12750 | HH22 | ARG E | 3 | 12510   | 9150   | 8630   | -2190 | 2270  | 440  | H0 |
| ATOM 12751  | N    | ALA E | 4 | -16.857 | 12.429 | -3.645 | 1.00  | 80.49 | N0   |    |
| ANISOU12751 | N    | ALA E | 4 | 14570   | 8580   | 7430   | -1270 | 1670  | 900  | N0 |
| ATOM 12752  | CA   | ALA E | 4 | -18.272 | 12.113 | -3.954 | 1.00  | 78.75 | C0   |    |
| ANISOU12752 | CA   | ALA E | 4 | 14400   | 8400   | 7120   | -990  | 1440  | 930  | C0 |
| ATOM 12753  | C    | ALA E | 4 | -18.349 | 10.940 | -4.939 | 1.00  | 76.99 | C0   |    |
| ANISOU12753 | C    | ALA E | 4 | 14100   | 8330   | 6820   | -1010 | 1520  | 900  | C0 |
| ATOM 12754  | O    | ALA E | 4 | -19.197 | 10.049 | -4.731 | 1.00  | 74.55 | O0   |    |
| ANISOU12754 | O    | ALA E | 4 | 13580   | 8180   | 6570   | -830  | 1390  | 850  | O0 |
| ATOM 12755  | CB   | ALA E | 4 | -18.969 | 13.338 | -4.500 | 1.00  | 80.70 | C0   |    |
| ANISOU12755 | CB   | ALA E | 4 | 15080   | 8420   | 7170   | -890  | 1290  | 1040 | C0 |
| ATOM 12756  | H    | ALA E | 4 | -16.648 | 13.288 | -3.864 | 1.00  | 82.17 | H0   |    |
| ANISOU12756 | H    | ALA E | 4 | 15030   | 8640   | 7550   | -1350 | 1680  | 960  | H0 |
| ATOM 12757  | HA   | ALA E | 4 | -18.716 | 11.842 | -3.122 | 1.00  | 77.10 | H0   |    |
| ANISOU12757 | HA   | ALA E | 4 | 13980   | 8270   | 7040   | -850  | 1350  | 880  | H0 |
| ATOM 12758  | HB1  | ALA E | 4 | -19.914 | 13.147 | -4.621 | 1.00  | 80.49 | H0   |    |
| ANISOU12758 | HB1  | ALA E | 4 | 15050   | 8430   | 7100   | -690  | 1130  | 1050 | H0 |
| ATOM 12759  | HB2  | ALA E | 4 | -18.866 | 14.076 | -3.877 | 1.00  | 81.08 | H0   |    |
| ANISOU12759 | HB2  | ALA E | 4 | 15190   | 8350   | 7260   | -890  | 1260  | 1050 | H0 |
| ATOM 12760  | HB3  | ALA E | 4 | -18.578 | 13.580 | -5.355 | 1.00  | 82.36 | H0   |    |
| ANISOU12760 | HB3  | ALA E | 4 | 15510   | 8550   | 7230   | -1030 | 1380  | 1100 | H0 |
| ATOM 12761  | N    | ASPE  | 5 | -17.498 | 10.954 | -5.968 | 1.00  | 77.77 | N0   |    |
| ANISOU12761 | N    | ASPE  | 5 | 14380   | 8390   | 6780   | -1240 | 1720  | 930  | N0 |
| ATOM 12762  | CA   | ASPE  | 5 | -17.429 | 9.905  | -7.021 | 1.00  | 77.34 | C0   |    |
| ANISOU12762 | CA   | ASPE  | 5 | 14310   | 8460   | 6620   | -1300 | 1830  | 900  | C0 |
| ATOM 12763  | C    | ASPE  | 5 | -16.871 | 8.614  | -6.414 | 1.00  | 74.43 | C0   |    |
| ANISOU12763 | C    | ASPE  | 5 | 13500   | 8300   | 6470   | -1320 | 1960  | 770  | C0 |
| ATOM 12764  | O    | ASPE  | 5 | -17.444 | 7.546  | -6.695 | 1.00  | 73.15 | O0   |    |
| ANISOU12764 | O    | ASPE  | 5 | 13210   | 8270   | 6310   | -1220 | 1910  | 720  | O0 |
| ATOM 12765  | CB   | ASPE  | 5 | -16.606 | 10.376 | -8.223 | 1.00  | 80.00 | C0   |    |
| ANISOU12765 | CB   | ASPE  | 5 | 14970   | 8690   | 6740   | -1550 | 2030  | 960  | C0 |
| ATOM 12766  | CG   | ASPE  | 5 | -17.357 | 11.343 | -9.121 | 1.00  | 82.43 | C0   |    |
| ANISOU12766 | CG   | ASPE  | 5 | 15740   | 8810   | 6770   | -1490 | 1870  | 1090 | C0 |
| ATOM 12767  | OD1  | ASPE  | 5 | -18.530 | 11.054 | -9.436 | 1.00  | 81.95 | O0   |    |
| ANISOU12767 | OD1  | ASPE  | 5 | 15730   | 8780   | 6620   | -1280 | 1650  | 1110 | O0 |
| ATOM 12768  | OD2  | ASPE  | 5 | -16.769 | 12.381 | -9.487 | 1.00  | 85.09 | O0   |    |
| ANISOU12768 | OD2  | ASPE  | 5 | 16390   | 8960   | 6990   | -1670 | 1970  | 1180 | O0 |
| ATOM 12769  | H    | ASPE  | 5 | -16.897 | 11.628 | -6.090 | 1.00  | 79.08 | H0   |    |
| ANISOU12769 | H    | ASPE  | 5 | 14700   | 8450   | 6900   | -1390 | 1810  | 970  | H0 |

|             |      |      |   |         |        |        |       |       |     |    |
|-------------|------|------|---|---------|--------|--------|-------|-------|-----|----|
| ATOM 12770  | HA   | ASPE | 5 | -18.348 | 9.727  | -7.331 | 1.00  | 77.22 | H0  |    |
| ANISOU12770 | HA   | ASPE | 5 | 14360   | 8460   | 6520   | -1150 | 1670  | 920 | H0 |
| ATOM 12771  | HB2  | ASPE | 5 | -15.794 | 10.816 | -7.901 | 1.00  | 80.58 | H0  |    |
| ANISOU12771 | HB2  | ASPE | 5 | 15020   | 8710   | 6880   | -1700 | 2160  | 960 | H0 |
| ATOM 12772  | HB3  | ASPE | 5 | -16.342 | 9.599  | -8.757 | 1.00  | 80.04 | H0  |    |
| ANISOU12772 | HB3  | ASPE | 5 | 14900   | 8790   | 6720   | -1610 | 2150  | 920 | H0 |
| ATOM 12773  | N    | ILEE | 6 | -15.801 | 8.716  | -5.620 | 1.00  | 73.32 | N0  |    |
| ANISOU12773 | N    | ILEE | 6 | 13160   | 8180   | 6520   | -1460 | 2110  | 730 | N0 |
| ATOM 12774  | CA   | ILEE | 6 | -15.163 | 7.565  | -4.915 | 1.00  | 72.02 | C0  |    |
| ANISOU12774 | CA   | ILEE | 6 | 12570   | 8210   | 6580   | -1470 | 2230  | 620 | C0 |
| ATOM 12775  | C    | ILEE | 6 | -16.219 | 6.889  | -4.030 | 1.00  | 69.89 | C0  |    |
| ANISOU12775 | C    | ILEE | 6 | 12070   | 8040   | 6450   | -1220 | 2020  | 570 | C0 |
| ATOM 12776  | O    | ILEE | 6 | -16.322 | 5.645  | -4.069 | 1.00  | 68.35 | O0  |    |
| ANISOU12776 | O    | ILEE | 6 | 11660   | 7990   | 6320   | -1170 | 2060  | 500 | O0 |
| ATOM 12777  | CB   | ILEE | 6 | -13.935 | 8.023  | -4.101 | 1.00  | 72.45 | C0  |    |
| ANISOU12777 | CB   | ILEE | 6 | 12460   | 8260   | 6800   | -1650 | 2380  | 590 | C0 |
| ATOM 12778  | CG1  | ILEE | 6 | -12.779 | 8.443  | -5.012 | 1.00  | 75.38 | C0  |    |
| ANISOU12778 | CG1  | ILEE | 6 | 12990   | 8580   | 7060   | -1930 | 2640  | 620 | C0 |
| ATOM 12779  | CG2  | ILEE | 6 | -13.504 | 6.948  | -3.110 | 1.00  | 70.82 | C0  |    |
| ANISOU12779 | CG2  | ILEE | 6 | 11820   | 8240   | 6850   | -1590 | 2420  | 500 | C0 |
| ATOM 12780  | CD1  | ILEE | 6 | -11.755 | 9.330  | -4.337 | 1.00  | 76.69 | C0  |    |
| ANISOU12780 | CD1  | ILEE | 6 | 13110   | 8700   | 7330   | -2130 | 2740  | 630 | C0 |
| ATOM 12781  | H    | ILEE | 6 | -15.388 | 9.512  | -5.460 | 1.00  | 74.48 | H0  |    |
| ANISOU12781 | H    | ILEE | 6 | 13410   | 8230   | 6650   | -1560 | 2150  | 770 | H0 |
| ATOM 12782  | HA   | ILEE | 6 | -14.864 | 6.923  | -5.584 | 1.00  | 72.43 | H0  |    |
| ANISOU12782 | HA   | ILEE | 6 | 12610   | 8320   | 6590   | -1530 | 2360  | 590 | H0 |
| ATOM 12783  | HB   | ILEE | 6 | -14.205 | 8.819  | -3.579 | 1.00  | 72.58 | H0  |    |
| ANISOU12783 | HB   | ILEE | 6 | 12560   | 8180   | 6830   | -1610 | 2270  | 630 | H0 |
| ATOM 12784  | HG12 | ILEE | 6 | -12.329 | 7.636  | -5.340 | 1.00  | 75.30 | H0  |    |
| ANISOU12784 | HG12 | ILEE | 6 | 12840   | 8680   | 7090   | -1970 | 2780  | 560 | H0 |
| ATOM 12785  | HG13 | ILEE | 6 | -13.145 | 8.919  | -5.787 | 1.00  | 76.59 | H0  |    |
| ANISOU12785 | HG13 | ILEE | 6 | 13440   | 8630   | 7030   | -1950 | 2610  | 680 | H0 |
| ATOM 12786  | HG21 | ILEE | 6 | -14.091 | 6.964  | -2.334 | 1.00  | 69.42 | H0  |    |
| ANISOU12786 | HG21 | ILEE | 6 | 11550   | 8070   | 6750   | -1460 | 2270  | 490 | H0 |
| ATOM 12787  | HG22 | ILEE | 6 | -12.590 | 7.115  | -2.823 | 1.00  | 71.23 | H0  |    |
| ANISOU12787 | HG22 | ILEE | 6 | 11760   | 8310   | 6990   | -1730 | 2550  | 480 | H0 |
| ATOM 12788  | HG23 | ILEE | 6 | -13.552 | 6.074  | -3.534 | 1.00  | 70.39 | H0  |    |
| ANISOU12788 | HG23 | ILEE | 6 | 11680   | 8270   | 6790   | -1560 | 2480  | 460 | H0 |
| ATOM 12789  | HD11 | ILEE | 6 | -12.203 | 10.083 | -3.916 | 1.00  | 76.53 | H0  |    |
| ANISOU12789 | HD11 | ILEE | 6 | 13220   | 8560   | 7300   | -2070 | 2590  | 670 | H0 |
| ATOM 12790  | HD12 | ILEE | 6 | -11.124 | 9.659  | -5.000 | 1.00  | 78.32 | H0  |    |
| ANISOU12790 | HD12 | ILEE | 6 | 13450   | 8860   | 7450   | -2310 | 2890  | 650 | H0 |
| ATOM 12791  | HD13 | ILEE | 6 | -11.276 | 8.820  | -3.662 | 1.00  | 75.59 | H0  |    |
| ANISOU12791 | HD13 | ILEE | 6 | 12680   | 8680   | 7370   | -2130 | 2780  | 560 | H0 |
| ATOM 12792  | N    | LEUE | 7 | -16.982 | 7.684  | -3.277 | 1.00  | 69.71 | N0  |    |
| ANISOU12792 | N    | LEUE | 7 | 12100   | 7940   | 6450   | -1080 | 1820  | 610 | N0 |
| ATOM 12793  | CA   | LEUE | 7 | -17.981 | 7.185  | -2.299 | 1.00  | 68.29 | C0  |    |
| ANISOU12793 | CA   | LEUE | 7 | 11690   | 7860   | 6390   | -860  | 1620  | 570 | C0 |
| ATOM 12794  | C    | LEUE | 7 | -19.202 | 6.624  | -3.039 | 1.00  | 67.93 | C0  |    |
| ANISOU12794 | C    | LEUE | 7 | 11730   | 7870   | 6220   | -700  | 1470  | 580 | C0 |
| ATOM 12795  | O    | LEUE | 7 | -19.679 | 5.545  | -2.638 | 1.00  | 65.62 | O0  |    |
| ANISOU12795 | O    | LEUE | 7 | 11180   | 7720   | 6030   | -600  | 1420  | 520 | O0 |
| ATOM 12796  | CB   | LEUE | 7 | -18.364 | 8.317  | -1.344 | 1.00  | 68.96 | C0  |    |
| ANISOU12796 | CB   | LEUE | 7 | 11840   | 7830   | 6530   | -760  | 1470  | 610 | C0 |

|             |              |         |       |         |       |       |     |    |
|-------------|--------------|---------|-------|---------|-------|-------|-----|----|
| ATOM 12797  | CG LEU E 7   | -19.188 | 7.871 | -0.140  | 1.00  | 68.27 | C0  |    |
| ANISOU12797 | CG LEU E 7   | 11490   | 7860  | 6590    | -560  | 1310  | 560 | C0 |
| ATOM 12798  | CD1 LEU E 7  | -18.570 | 8.378 | 1.155   | 1.00  | 68.00 | C0  |    |
| ANISOU12798 | CD1 LEU E 7  | 11320   | 7800  | 6720    | -600  | 1340  | 530 | C0 |
| ATOM 12799  | CD2 LEU E 7  | -20.638 | 8.313 | -0.283  | 1.00  | 68.97 | C0  |    |
| ANISOU12799 | CD2 LEU E 7  | 11720   | 7910  | 6570    | -330  | 1080  | 600 | C0 |
| ATOM 12800  | H LEU E 7    | -16.932 | 8.593 | -3.319  | 1.00  | 70.80 | H0  |    |
| ANISOU12800 | H LEU E 7    | 12430   | 7950  | 6520    | -1120 | 1790  | 670 | H0 |
| ATOM 12801  | HA LEU E 7   | -17.566 | 6.454 | -1.784  | 1.00  | 67.11 | H0  |    |
| ANISOU12801 | HA LEU E 7   | 11300   | 7810  | 6390    | -870  | 1690  | 510 | H0 |
| ATOM 12802  | HB2 LEU E 7  | -17.544 | 8.744 | -1.025  | 1.00  | 69.49 | H0  |    |
| ANISOU12802 | HB2 LEU E 7  | 11900   | 7850  | 6650    | -890  | 1570  | 610 | H0 |
| ATOM 12803  | HB3 LEU E 7  | -18.872 | 8.987 | -1.845  | 1.00  | 70.24 | H0  |    |
| ANISOU12803 | HB3 LEU E 7  | 12250   | 7890  | 6550    | -710  | 1390  | 670 | H0 |
| ATOM 12804  | HG LEU E 7   | -19.176 | 6.883 | -0.113  | 1.00  | 67.13 | H0  |    |
| ANISOU12804 | HG LEU E 7   | 11150   | 7840  | 6510    | -550  | 1350  | 510 | H0 |
| ATOM 12805  | HD11 LEU E 7 | -17.727 | 7.919 | 1.314   | 1.00  | 67.54 | H0  |    |
| ANISOU12805 | HD11 LEU E 7 | 11110   | 7800  | 6750    | -720  | 1460  | 490 | H0 |
| ATOM 12806  | HD12 LEU E 7 | -19.176 | 8.205 | 1.895   | 1.00  | 66.83 | H0  |    |
| ANISOU12806 | HD12 LEU E 7 | 11040   | 7710  | 6640    | -470  | 1230  | 500 | H0 |
| ATOM 12807  | HD13 LEU E 7 | -18.408 | 9.334 | 1.084   | 1.00  | 69.04 | H0  |    |
| ANISOU12807 | HD13 LEU E 7 | 11650   | 7800  | 6790    | -650  | 1330  | 570 | H0 |
| ATOM 12808  | HD21 LEU E 7 | -20.703 | 9.271 | -0.126  | 1.00  | 69.74 | H0  |    |
| ANISOU12808 | HD21 LEU E 7 | 11990   | 7880  | 6630    | -310  | 1030  | 640 | H0 |
| ATOM 12809  | HD22 LEU E 7 | -21.187 | 7.840 | 0.366   | 1.00  | 67.63 | H0  |    |
| ANISOU12809 | HD22 LEU E 7 | 11360   | 7840  | 6500    | -210  | 1000  | 560 | H0 |
| ATOM 12810  | HD23 LEU E 7 | -20.953 | 8.110 | -1.181  | 1.00  | 69.57 | H0  |    |
| ANISOU12810 | HD23 LEU E 7 | 11920   | 7990  | 6530    | -320  | 1070  | 630 | H0 |
| ATOM 12811  | N TYR E 8    | -19.680 | 7.318 | -4.078  | 1.00  | 69.72 | N0  |    |
| ANISOU12811 | N TYR E 8    | 12290   | 7980  | 6220    | -690  | 1400  | 660 | N0 |
| ATOM 12812  | CA TYR E 8   | -20.773 | 6.842 | -4.969  | 1.00  | 70.56 | C0  |    |
| ANISOU12812 | CA TYR E 8   | 12510   | 8140  | 6170    | -570  | 1250  | 680 | C0 |
| ATOM 12813  | C TYR E 8    | -20.383 | 5.494 | -5.587  | 1.00  | 68.96 | C0  |    |
| ANISOU12813 | C TYR E 8    | 12180   | 8060  | 5960    | -670  | 1410  | 600 | C0 |
| ATOM 12814  | O TYR E 8    | -21.251 | 4.611 | -5.653  | 1.00  | 68.60 | O0  |    |
| ANISOU12814 | O TYR E 8    | 12010   | 8140  | 5920    | -560  | 1290  | 560 | O0 |
| ATOM 12815  | CB TYR E 8   | -21.092 | 7.861 | -6.066  | 1.00  | 74.30 | C0  |    |
| ANISOU12815 | CB TYR E 8   | 13400   | 8450  | 6380    | -580  | 1180  | 790 | C0 |
| ATOM 12816  | CG TYR E 8   | -22.054 | 7.368 | -7.120  | 1.00  | 76.83 | C0  |    |
| ANISOU12816 | CG TYR E 8   | 13850   | 8830  | 6510    | -500  | 1040  | 810 | C0 |
| ATOM 12817  | CD1 TYR E 8  | -23.416 | 7.285 | -6.868  | 1.00  | 77.54 | C0  |    |
| ANISOU12817 | CD1 TYR E 8  | 13860   | 9000  | 6600    | -260  | 780   | 810 | C0 |
| ATOM 12818  | CD2 TYR E 8  | -21.605 | 6.982 | -8.374  | 1.00  | 79.04 | C0  |    |
| ANISOU12818 | CD2 TYR E 8  | 14320   | 9110  | 6600    | -660  | 1180  | 810 | C0 |
| ATOM 12819  | CE1 TYR E 8  | -24.304 | 6.834 | -7.833  | 1.00  | 79.01 | C0  |    |
| ANISOU12819 | CE1 TYR E 8  | 14150   | 9260  | 6610    | -200  | 630   | 830 | C0 |
| ATOM 12820  | CE2 TYR E 8  | -22.479 | 6.532 | -9.350  | 1.00  | 80.66 | C0  |    |
| ANISOU12820 | CE2 TYR E 8  | 14660   | 9370  | 6610    | -590  | 1040  | 830 | C0 |
| ATOM 12821  | CZ TYR E 8   | -23.835 | 6.457 | -9.080  | 1.00  | 80.83 | C0  |    |
| ANISOU12821 | CZ TYR E 8   | 14600   | 9480  | 6640    | -370  | 760   | 830 | C0 |
| ATOM 12822  | OH TYR E 8   | -24.700 | 6.017 | -10.042 | 1.00  | 82.82 | O0  |    |
| ANISOU12822 | OH TYR E 8   | 14960   | 9800  | 6700    | -320  | 610   | 840 | O0 |
| ATOM 12823  | H TYR E 8    | -19.371 | 8.142 | -4.312  | 1.00  | 71.03 | H0  |    |
| ANISOU12823 | H TYR E 8    | 12660   | 8020  | 6310    | -760  | 1430  | 720 | H0 |



|                          |         |       |         |       |       |     |    |
|--------------------------|---------|-------|---------|-------|-------|-----|----|
| ATOM 12824 HA TYR E 8    | -21.587 | 6.708 | -4.420  | 1.00  | 69.60 |     | H0 |
| ANISOU12824 HA TYR E 8   | 12260   | 8080  | 6110    | -420  | 1100  | 670 | H0 |
| ATOM 12825 HB2 TYR E 8   | -21.469 | 8.661 | -5.644  | 1.00  | 74.65 |     | H0 |
| ANISOU12825 HB2 TYR E 8  | 13520   | 8410  | 6430    | -480  | 1060  | 830 | H0 |
| ATOM 12826 HB3 TYR E 8   | -20.253 | 8.121 | -6.501  | 1.00  | 75.34 |     | H0 |
| ANISOU12826 HB3 TYR E 8  | 13660   | 8510  | 6450    | -750  | 1340  | 810 | H0 |
| ATOM 12827 HD1 TYR E 8   | -23.746 | 7.541 | -6.022  | 1.00  | 76.54 |     | H0 |
| ANISOU12827 HD1 TYR E 8  | 13600   | 8890  | 6590    | -150  | 690   | 800 | H0 |
| ATOM 12828 HD2 TYR E 8   | -20.684 | 7.031 | -8.569  | 1.00  | 79.44 |     | H0 |
| ANISOU12828 HD2 TYR E 8  | 14420   | 9110  | 6650    | -820  | 1370  | 810 | H0 |
| ATOM 12829 HE1 TYR E 8   | -25.226 | 6.788 | -7.643  | 1.00  | 78.83 |     | H0 |
| ANISOU12829 HE1 TYR E 8  | 14050   | 9310  | 6590    | -40   | 450   | 830 | H0 |
| ATOM 12830 HE2 TYR E 8   | -22.153 | 6.277 | -10.198 | 1.00  | 81.65 |     | H0 |
| ANISOU12830 HE2 TYR E 8  | 14930   | 9490  | 6600    | -710  | 1140  | 830 | H0 |
| ATOM 12831 N ASN E 9     | -19.124 | 5.341 | -6.010  | 1.00  | 68.17 |     | N0 |
| ANISOU12831 N ASN E 9    | 12100   | 7940  | 5860    | -880  | 1660  | 580 | N0 |
| ATOM 12832 CA ASN E 9    | -18.605 | 4.104 | -6.659  | 1.00  | 67.49 |     | C0 |
| ANISOU12832 CA ASN E 9   | 11920   | 7960  | 5760    | -980  | 1840  | 500 | C0 |
| ATOM 12833 C ASN E 9     | -18.498 | 2.971 | -5.630  | 1.00  | 65.03 |     | C0 |
| ANISOU12833 C ASN E 9    | 11220   | 7790  | 5700    | -910  | 1870  | 400 | C0 |
| ATOM 12834 O ASN E 9     | -18.945 | 1.860 | -5.950  | 1.00  | 63.30 |     | O0 |
| ANISOU12834 O ASN E 9    | 10930   | 7660  | 5470    | -870  | 1850  | 340 | O0 |
| ATOM 12835 CB ASN E 9    | -17.263 | 4.343 | -7.357  | 1.00  | 68.75 |     | C0 |
| ANISOU12835 CB ASN E 9   | 12210   | 8060  | 5850    | -1210 | 2120  | 500 | C0 |
| ATOM 12836 CG ASN E 9    | -17.398 | 5.070 | -8.680  | 1.00  | 70.88 |     | C0 |
| ANISOU12836 CG ASN E 9   | 12890   | 8210  | 5830    | -1300 | 2130  | 590 | C0 |
| ATOM 12837 OD1 ASN E 9   | -18.500 | 5.427 | -9.096  | 1.00  | 71.01 |     | O0 |
| ANISOU12837 OD1 ASN E 9  | 13110   | 8180  | 5690    | -1180 | 1910  | 650 | O0 |
| ATOM 12838 ND2 ASN E 9   | -16.280 | 5.292 | -9.351  | 1.00  | 71.87 |     | N0 |
| ANISOU12838 ND2 ASN E 9  | 13140   | 8290  | 5870    | -1510 | 2390  | 590 | N0 |
| ATOM 12839 H ASN E 9     | -18.499 | 5.999 | -5.929  | 1.00  | 69.01 |     | H0 |
| ANISOU12839 H ASN E 9    | 12290   | 7970  | 5970    | -970  | 1740  | 610 | H0 |
| ATOM 12840 HA ASN E 9    | -19.254 | 3.830 | -7.349  | 1.00  | 68.04 |     | H0 |
| ANISOU12840 HA ASN E 9   | 12120   | 8040  | 5690    | -940  | 1760  | 510 | H0 |
| ATOM 12841 HB2 ASN E 9   | -16.686 | 4.866 | -6.764  | 1.00  | 68.62 |     | H0 |
| ANISOU12841 HB2 ASN E 9  | 12120   | 8010  | 5940    | -1260 | 2180  | 520 | H0 |
| ATOM 12842 HB3 ASN E 9   | -16.831 | 3.478 | -7.513  | 1.00  | 68.50 |     | H0 |
| ANISOU12842 HB3 ASN E 9  | 12040   | 8110  | 5870    | -1250 | 2260  | 430 | H0 |
| ATOM 12843 HD21 ASN E 9  | -16.305 | 5.720 | -10.125 | 1.00  | 73.64 |     | H0 |
| ANISOU12843 HD21 ASN E 9 | 13620   | 8440  | 5920    | -1580 | 2410  | 650 | H0 |
| ATOM 12844 HD22 ASN E 9  | -15.506 | 5.012 | -9.028  | 1.00  | 71.77 |     | H0 |
| ANISOU12844 HD22 ASN E 9 | 12950   | 8330  | 5980    | -1590 | 2540  | 540 | H0 |
| ATOM 12845 N ILE E 10    | -17.919 | 3.237 | -4.452  | 1.00  | 64.35 |     | N0 |
| ANISOU12845 N ILE E 10   | 10920   | 7710  | 5820    | -910  | 1900  | 390 | N0 |
| ATOM 12846 CA ILE E 10   | -17.761 | 2.237 | -3.353  | 1.00  | 62.99 |     | C0 |
| ANISOU12846 CA ILE E 10  | 10390   | 7660  | 5880    | -840  | 1910  | 310 | C0 |
| ATOM 12847 C ILE E 10    | -19.122 | 1.586 | -3.090  | 1.00  | 63.19 |     | C0 |
| ANISOU12847 C ILE E 10   | 10340   | 7760  | 5910    | -670  | 1700  | 290 | C0 |
| ATOM 12848 O ILE E 10    | -19.192 | 0.348 | -3.138  | 1.00  | 62.43 |     | O0 |
| ANISOU12848 O ILE E 10   | 10100   | 7760  | 5870    | -660  | 1750  | 220 | O0 |
| ATOM 12849 CB ILE E 10   | -17.173 | 2.867 | -2.071  | 1.00  | 61.55 |     | C0 |
| ANISOU12849 CB ILE E 10  | 10040   | 7470  | 5880    | -850  | 1910  | 320 | C0 |
| ATOM 12850 CG1 ILE E 10  | -15.656 | 3.039 | -2.175  | 1.00  | 62.39 |     | C0 |
| ANISOU12850 CG1 ILE E 10 | 10090   | 7560  | 6050    | -1040 | 2150  | 310 | C0 |

|             |               |         |       |        |       |       |     |    |
|-------------|---------------|---------|-------|--------|-------|-------|-----|----|
| ATOM 12851  | CG2 ILE E 10  | -17.552 | 2.053 | -0.838 | 1.00  | 59.23 | C0  |    |
| ANISOU12851 | CG2 ILE E 10  | 9440    | 7280  | 5790   | -720  | 1820  | 270 | C0 |
| ATOM 12852  | CD1 ILE E 10  | -15.056 | 3.919 | -1.105 | 1.00  | 61.87 | C0  |    |
| ANISOU12852 | CD1 ILE E 10  | 9930    | 7460  | 6120   | -1090 | 2140  | 330 | C0 |
| ATOM 12853  | H ILE E 10    | -17.576 | 4.057 | -4.250 | 1.00  | 64.88 | H0  |    |
| ANISOU12853 | H ILE E 10    | 11060   | 7700  | 5890   | -960  | 1910  | 430 | H0 |
| ATOM 12854  | HA ILE E 10   | -17.146 | 1.546 | -3.659 | 1.00  | 63.20 | H0  |    |
| ANISOU12854 | HA ILE E 10   | 10350   | 7730  | 5940   | -910  | 2060  | 270 | H0 |
| ATOM 12855  | HB ILE E 10   | -17.570 | 3.767 | -1.970 | 1.00  | 61.95 | H0  |    |
| ANISOU12855 | HB ILE E 10   | 10230   | 7440  | 5870   | -820  | 1810  | 380 | H0 |
| ATOM 12856  | HG12 ILE E 10 | -15.236 | 2.154 | -2.125 | 1.00  | 61.96 | H0  |    |
| ANISOU12856 | HG12 ILE E 10 | 9870    | 7590  | 6090   | -1050 | 2250  | 250 | H0 |
| ATOM 12857  | HG13 ILE E 10 | -15.442 | 3.422 | -3.053 | 1.00  | 63.75 | H0  |    |
| ANISOU12857 | HG13 ILE E 10 | 10460   | 7670  | 6090   | -1130 | 2230  | 340 | H0 |
| ATOM 12858  | HG21 ILE E 10 | -18.494 | 2.184 | -0.635 | 1.00  | 58.84 | H0  |    |
| ANISOU12858 | HG21 ILE E 10 | 9420    | 7240  | 5700   | -610  | 1660  | 290 | H0 |
| ATOM 12859  | HG22 ILE E 10 | -17.019 | 2.342 | -0.078 | 1.00  | 58.95 | H0  |    |
| ANISOU12859 | HG22 ILE E 10 | 9290    | 7250  | 5860   | -750  | 1840  | 270 | H0 |
| ATOM 12860  | HG23 ILE E 10 | -17.385 | 1.109 | -1.006 | 1.00  | 59.01 | H0  |    |
| ANISOU12860 | HG23 ILE E 10 | 9300    | 7320  | 5800   | -720  | 1890  | 220 | H0 |
| ATOM 12861  | HD11 ILE E 10 | -15.614 | 4.707 | -0.980 | 1.00  | 62.12 | H0  |    |
| ANISOU12861 | HD11 ILE E 10 | 10110   | 7410  | 6080   | -1050 | 2020  | 370 | H0 |
| ATOM 12862  | HD12 ILE E 10 | -14.163 | 4.196 | -1.373 | 1.00  | 63.04 | H0  |    |
| ANISOU12862 | HD12 ILE E 10 | 10090   | 7590  | 6260   | -1240 | 2290  | 330 | H0 |
| ATOM 12863  | HD13 ILE E 10 | -15.003 | 3.426 | -0.268 | 1.00  | 60.77 | H0  |    |
| ANISOU12863 | HD13 ILE E 10 | 9570    | 7400  | 6120   | -1030 | 2110  | 290 | H0 |
| ATOM 12864  | N ARGE 11     | -20.154 | 2.392 | -2.824 | 1.00  | 64.89 | N0  |    |
| ANISOU12864 | N ARGE 11     | 10650   | 7940  | 6070   | -550  | 1490  | 350 | N0 |
| ATOM 12865  | CA ARGE 11    | -21.486 | 1.894 | -2.390 | 1.00  | 66.24 | C0  |    |
| ANISOU12865 | CA ARGE 11    | 10690   | 8210  | 6260   | -380  | 1280  | 330 | C0 |
| ATOM 12866  | C ARGE 11     | -22.244 | 1.355 | -3.612 | 1.00  | 67.92 | C0  |    |
| ANISOU12866 | C ARGE 11     | 11060   | 8460  | 6290   | -380  | 1210  | 330 | C0 |
| ATOM 12867  | O ARGE 11     | -23.150 | 0.519 | -3.412 | 1.00  | 68.82 | O0  |    |
| ANISOU12867 | O ARGE 11     | 11040   | 8680  | 6430   | -290  | 1090  | 280 | O0 |
| ATOM 12868  | CB ARGE 11    | -22.236 | 2.973 | -1.595 | 1.00  | 67.56 | C0  |    |
| ANISOU12868 | CB ARGE 11    | 10880   | 8340  | 6450   | -240  | 1090  | 380 | C0 |
| ATOM 12869  | CG ARGE 11    | -23.036 | 3.970 | -2.421 | 1.00  | 70.37 | C0  |    |
| ANISOU12869 | CG ARGE 11    | 11520   | 8610  | 6600   | -160  | 940   | 460 | C0 |
| ATOM 12870  | CD ARGE 11    | -24.176 | 4.585 | -1.623 | 1.00  | 71.36 | C0  |    |
| ANISOU12870 | CD ARGE 11    | 11590   | 8760  | 6770   | 50    | 720   | 480 | C0 |
| ATOM 12871  | NE ARGE 11    | -25.191 | 5.161 | -2.502 | 1.00  | 74.46 | N0  |    |
| ANISOU12871 | NE ARGE 11    | 12210   | 9120  | 6970   | 170   | 530   | 550 | N0 |
| ATOM 12872  | CZ ARGE 11    | -26.091 | 4.466 | -3.206 | 1.00  | 75.50 | C0  |    |
| ANISOU12872 | CZ ARGE 11    | 12320   | 9360  | 7000   | 220   | 420   | 530 | C0 |
| ATOM 12873  | NH1 ARGE 11   | -26.957 | 5.102 | -3.979 | 1.00  | 77.47 | N0  |    |
| ANISOU12873 | NH1 ARGE 11   | 12780   | 9580  | 7070   | 330   | 230   | 600 | N0 |
| ATOM 12874  | NH2 ARGE 11   | -26.125 | 3.144 | -3.144 | 1.00  | 74.14 | N0  |    |
| ANISOU12874 | NH2 ARGE 11   | 11940   | 9330  | 6900   | 150   | 470   | 450 | N0 |
| ATOM 12875  | H ARGE 11     | -20.101 | 3.299 | -2.896 | 1.00  | 65.75 | H0  |    |
| ANISOU12875 | H ARGE 11     | 10900   | 7970  | 6120   | -560  | 1460  | 400 | H0 |
| ATOM 12876  | HA ARGE 11    | -21.329 | 1.135 | -1.782 | 1.00  | 65.03 | H0  |    |
| ANISOU12876 | HA ARGE 11    | 10330   | 8130  | 6240   | -370  | 1320  | 280 | H0 |
| ATOM 12877  | HB2 ARGE 11   | -22.844 | 2.524 | -0.973 | 1.00  | 66.48 | H0  |    |
| ANISOU12877 | HB2 ARGE 11   | 10570   | 8290  | 6400   | -140  | 1000  | 350 | H0 |

|                           |         |        |         |      |       |     |    |
|---------------------------|---------|--------|---------|------|-------|-----|----|
| ATOM 12878 HB3 ARG E 11   | -21.581 | 3.470  | -1.061  | 1.00 | 67.26 | H0  |    |
| ANISOU12878 HB3 ARG E 11  | 10820   | 8250   | 6490    | -280 | 1160  | 390 | H0 |
| ATOM 12879 HG2 ARG E 11   | -22.441 | 4.685  | -2.731  | 1.00 | 71.33 | H0  |    |
| ANISOU12879 HG2 ARG E 11  | 11820   | 8620   | 6670    | -230 | 1010  | 510 | H0 |
| ATOM 12880 HG3 ARG E 11   | -23.405 | 3.521  | -3.210  | 1.00 | 71.01 | H0  |    |
| ANISOU12880 HG3 ARG E 11  | 11680   | 8730   | 6580    | -170 | 910   | 460 | H0 |
| ATOM 12881 HD2 ARG E 11   | -24.588 | 3.899  | -1.056  | 1.00 | 70.27 | H0  |    |
| ANISOU12881 HD2 ARG E 11  | 11240   | 8730   | 6730    | 110  | 680   | 440 | H0 |
| ATOM 12882 HD3 ARG E 11   | -23.820 | 5.287  | -1.038  | 1.00 | 71.30 | H0  |    |
| ANISOU12882 HD3 ARG E 11  | 11600   | 8670   | 6820    | 60   | 740   | 500 | H0 |
| ATOM 12883 HE ARG E 11    | -25.207 | 6.030  | -2.581  | 1.00 | 75.19 | H0  |    |
| ANISOU12883 HE ARG E 11   | 12460   | 9110   | 7000    | 210  | 490   | 600 | H0 |
| ATOM 12884 HH11 ARG E 11  | -26.943 | 5.980  | -4.024  | 1.00 | 78.22 | H0  |    |
| ANISOU12884 HH11 ARG E 11 | 13030   | 9570   | 7120    | 380  | 190   | 660 | H0 |
| ATOM 12885 HH12 ARG E 11  | -27.552 | 4.647  | -4.439  | 1.00 | 77.77 | H0  |    |
| ANISOU12885 HH12 ARG E 11 | 12800   | 9710   | 7040    | 360  | 150   | 590 | H0 |
| ATOM 12886 HH21 ARG E 11  | -25.554 | 2.708  | -2.638  | 1.00 | 73.09 | H0  |    |
| ANISOU12886 HH21 ARG E 11 | 11670   | 9210   | 6880    | 90   | 590   | 410 | H0 |
| ATOM 12887 HH22 ARG E 11  | -26.724 | 2.700  | -3.614  | 1.00 | 74.61 | H0  |    |
| ANISOU12887 HH22 ARG E 11 | 12000   | 9460   | 6890    | 170  | 390   | 440 | H0 |
| ATOM 12888 N GLN E 12     | -21.868 | 1.793  | -4.819  | 1.00 | 69.77 | N0  |    |
| ANISOU12888 N GLN E 12    | 11580   | 8600   | 6330    | -480 | 1290  | 370 | N0 |
| ATOM 12889 CA GLN E 12    | -22.397 | 1.294  | -6.119  | 1.00 | 70.66 | C0  |    |
| ANISOU12889 CA GLN E 12   | 11880   | 8740   | 6230    | -510 | 1250  | 360 | C0 |
| ATOM 12890 C GLN E 12     | -22.012 | -0.182 | -6.289  | 1.00 | 69.09 | C0  |    |
| ANISOU12890 C GLN E 12    | 11530   | 8620   | 6090    | -590 | 1400  | 250 | C0 |
| ATOM 12891 O GLN E 12     | -22.929 | -0.998 | -6.493  | 1.00 | 69.59 | O0  |    |
| ANISOU12891 O GLN E 12    | 11550   | 8780   | 6120    | -540 | 1270  | 210 | O0 |
| ATOM 12892 CB GLN E 12    | -21.854 | 2.146  | -7.272  | 1.00 | 74.49 | C0  |    |
| ANISOU12892 CB GLN E 12   | 12720   | 9090   | 6490    | -630 | 1340  | 430 | C0 |
| ATOM 12893 CG GLN E 12    | -22.519 | 1.896  | -8.621  | 1.00 | 77.27 | C0  |    |
| ANISOU12893 CG GLN E 12   | 13320   | 9450   | 6580    | -650 | 1250  | 440 | C0 |
| ATOM 12894 CD GLN E 12    | -23.847 | 2.600  | -8.770  | 1.00 | 78.67 | C0  |    |
| ANISOU12894 CD GLN E 12   | 13620   | 9630   | 6640    | -480 | 950   | 520 | C0 |
| ATOM 12895 OE1 GLN E 12   | -24.442 | 3.072  | -7.801  | 1.00 | 79.62 | O0  |    |
| ANISOU12895 OE1 GLN E 12  | 13590   | 9770   | 6890    | -330 | 800   | 540 | O0 |
| ATOM 12896 NE2 GLN E 12   | -24.329 | 2.673  | -9.999  | 1.00 | 80.05 | N0  |    |
| ANISOU12896 NE2 GLN E 12  | 14070   | 9790   | 6550    | -500 | 860   | 560 | N0 |
| ATOM 12897 H GLN E 12     | -21.252 | 2.455  | -4.919  | 1.00 | 70.24 | H0  |    |
| ANISOU12897 H GLN E 12    | 11740   | 8580   | 6360    | -540 | 1370  | 400 | H0 |
| ATOM 12898 HA GLN E 12    | -23.379 | 1.365  | -6.103  | 1.00 | 70.94 | H0  |    |
| ANISOU12898 HA GLN E 12   | 11920   | 8820   | 6220    | -400 | 1060  | 380 | H0 |
| ATOM 12899 HB2 GLN E 12   | -21.966 | 3.088  | -7.038  | 1.00 | 74.66 | H0  |    |
| ANISOU12899 HB2 GLN E 12  | 12830   | 9040   | 6500    | -580 | 1260  | 500 | H0 |
| ATOM 12900 HB3 GLN E 12   | -20.895 | 1.974  | -7.357  | 1.00 | 74.39 | H0  |    |
| ANISOU12900 HB3 GLN E 12  | 12690   | 9060   | 6520    | -740 | 1530  | 400 | H0 |
| ATOM 12901 HG2 GLN E 12   | -21.917 | 2.200  | -9.334  | 1.00 | 78.44 | H0  |    |
| ANISOU12901 HG2 GLN E 12  | 13670   | 9530   | 6610    | -760 | 1380  | 470 | H0 |
| ATOM 12902 HG3 GLN E 12   | -22.653 | 0.935  | -8.736  | 1.00 | 76.71 | H0  |    |
| ANISOU12902 HG3 GLN E 12  | 13150   | 9460   | 6540    | -660 | 1280  | 370 | H0 |
| ATOM 12903 HE21 GLN E 12  | -25.098 | 3.082  | -10.146 | 1.00 | 80.92 | H0  |    |
| ANISOU12903 HE21 GLN E 12 | 14250   | 9910   | 6580    | -400 | 680   | 610 | H0 |
| ATOM 12904 HE22 GLN E 12  | -23.884 | 2.311  | -10.671 | 1.00 | 80.95 | H0  |    |
| ANISOU12904 HE22 GLN E 12 | 14290   | 9890   | 6570    | -620 | 990   | 530 | H0 |

|                           |         |        |        |       |       |      |    |
|---------------------------|---------|--------|--------|-------|-------|------|----|
| ATOM 12905 N THR E 13     | -20.717 | -0.513 | -6.196 | 1.00  | 67.31 |      | N0 |
| ANISOU12905 N THR E 13    | 11240   | 8370   | 5970   | -700  | 1650  | 210  | N0 |
| ATOM 12906 CA THR E 13    | -20.177 | -1.878 | -6.462 | 1.00  | 66.12 |      | C0 |
| ANISOU12906 CA THR E 13   | 10980   | 8270   | 5870   | -770  | 1820  | 110  | C0 |
| ATOM 12907 C THR E 13     | -20.264 | -2.742 | -5.191 | 1.00  | 63.39 |      | C0 |
| ANISOU12907 C THR E 13    | 10300   | 8010   | 5770   | -680  | 1800  | 50   | C0 |
| ATOM 12908 O THR E 13     | -20.508 | -3.955 | -5.331 | 1.00  | 62.33 |      | O0 |
| ANISOU12908 O THR E 13    | 10100   | 7920   | 5660   | -680  | 1820  | -20  | O0 |
| ATOM 12909 CB THR E 13    | -18.752 | -1.844 | -7.036 | 1.00  | 67.07 |      | C0 |
| ANISOU12909 CB THR E 13   | 11170   | 8340   | 5970   | -910  | 2110  | 90   | C0 |
| ATOM 12910 OG1 THR E 13   | -17.817 | -1.718 | -5.966 | 1.00  | 66.42 |      | O0 |
| ANISOU12910 OG1 THR E 13  | 10840   | 8270   | 6120   | -920  | 2220  | 80   | O0 |
| ATOM 12911 CG2 THR E 13   | -18.529 | -0.732 | -8.039 | 1.00  | 68.98 |      | C0 |
| ANISOU12911 CG2 THR E 13  | 11730   | 8490   | 5990   | -1010 | 2150  | 160  | C0 |
| ATOM 12912 H THR E 13     | -20.070 | 0.076  | -5.942 | 1.00  | 67.52 |      | H0 |
| ANISOU12912 H THR E 13    | 11260   | 8350   | 6040   | -740  | 1730  | 240  | H0 |
| ATOM 12913 HA THR E 13    | -20.758 | -2.292 | -7.141 | 1.00  | 66.79 |      | H0 |
| ANISOU12913 HA THR E 13   | 11170   | 8380   | 5830   | -770  | 1760  | 90   | H0 |
| ATOM 12914 HB THR E 13    | -18.590 | -2.705 | -7.489 | 1.00  | 67.54 |      | H0 |
| ANISOU12914 HB THR E 13   | 11230   | 8430   | 6010   | -950  | 2210  | 20   | H0 |
| ATOM 12915 HG21 THR E 13  | -19.306 | -0.659 | -8.623 | 1.00  | 69.63 |      | H0 |
| ANISOU12915 HG21 THR E 13 | 11970   | 8560   | 5920   | -990  | 2030  | 190  | H0 |
| ATOM 12916 HG22 THR E 13  | -17.740 | -0.930 | -8.574 | 1.00  | 69.97 |      | H0 |
| ANISOU12916 HG22 THR E 13 | 11910   | 8600   | 6080   | -1120 | 2350  | 130  | H0 |
| ATOM 12917 HG23 THR E 13  | -18.397 | 0.110  | -7.570 | 1.00  | 68.79 |      | H0 |
| ANISOU12917 HG23 THR E 13 | 11700   | 8420   | 6010   | -1010 | 2110  | 220  | H0 |
| ATOM 12918 N SER E 14     | -20.078 | -2.154 | -4.003 | 1.00  | 61.20 |      | N0 |
| ANISOU12918 N SER E 14    | 9850    | 7740   | 5660   | -620  | 1750  | 90   | N0 |
| ATOM 12919 CA SER E 14    | -20.118 | -2.862 | -2.693 | 1.00  | 58.78 |      | C0 |
| ANISOU12919 CA SER E 14   | 9250    | 7500   | 5580   | -540  | 1720  | 50   | C0 |
| ATOM 12920 C SER E 14     | -21.394 | -3.708 | -2.593 | 1.00  | 56.87 |      | C0 |
| ANISOU12920 C SER E 14    | 8950    | 7340   | 5320   | -470  | 1550  | 20   | C0 |
| ATOM 12921 O SER E 14     | -22.464 | -3.198 | -2.980 | 1.00  | 57.67 |      | O0 |
| ANISOU12921 O SER E 14    | 9170    | 7460   | 5290   | -420  | 1370  | 60   | O0 |
| ATOM 12922 CB SER E 14    | -20.021 | -1.896 | -1.537 | 1.00  | 57.94 |      | C0 |
| ANISOU12922 CB SER E 14   | 9030    | 7390   | 5600   | -490  | 1640  | 110  | C0 |
| ATOM 12923 OG SER E 14    | -20.094 | -2.582 | -0.298 | 1.00  | 56.62 |      | O0 |
| ANISOU12923 OG SER E 14   | 8600    | 7290   | 5620   | -420  | 1610  | 80   | O0 |
| ATOM 12924 H SER E 14     | -19.904 | -1.265 | -3.909 | 1.00  | 61.56 |      | H0 |
| ANISOU12924 H SER E 14    | 9970    | 7730   | 5690   | -630  | 1730  | 140  | H0 |
| ATOM 12925 HA SER E 14    | -19.336 | -3.476 | -2.655 | 1.00  | 58.67 |      | H0 |
| ANISOU12925 HA SER E 14   | 9150    | 7490   | 5650   | -590  | 1870  | 10   | H0 |
| ATOM 12926 HB2 SER E 14   | -19.169 | -1.410 | -1.588 | 1.00  | 58.46 |      | H0 |
| ANISOU12926 HB2 SER E 14  | 9130    | 7410   | 5680   | -550  | 1750  | 120  | H0 |
| ATOM 12927 HB3 SER E 14   | -20.753 | -1.241 | -1.595 | 1.00  | 58.16 |      | H0 |
| ANISOU12927 HB3 SER E 14  | 9150    | 7400   | 5540   | -430  | 1500  | 150  | H0 |
| ATOM 12928 N ARG E 15     | -21.277 | -4.943 | -2.091 | 1.00  | 54.85 |      | N0 |
| ANISOU12928 N ARG E 15    | 8520    | 7130   | 5190   | -460  | 1610  | -40  | N0 |
| ATOM 12929 CA ARG E 15    | -22.414 | -5.880 | -1.853 | 1.00  | 53.06 |      | C0 |
| ANISOU12929 CA ARG E 15   | 8210    | 6980   | 4970   | -420  | 1470  | -80  | C0 |
| ATOM 12930 C ARG E 15     | -22.409 | -6.294 | -0.385 | 1.00  | 50.48 |      | C0 |
| ANISOU12930 C ARG E 15    | 7630    | 6700   | 4860   | -350  | 1440  | -90  | C0 |
| ATOM 12931 O ARG E 15     | -21.803 | -7.300 | -0.021 | 1.00  | 49.61 |      | O0 |
| ANISOU12931 O ARG E 15    | 7410    | 6580   | 4870   | -360  | 1560  | -130 | O0 |

|                           |         |         |        |      |       |      |    |
|---------------------------|---------|---------|--------|------|-------|------|----|
| ATOM 12932 CB ARG E 15    | -22.315 | -7.104  | -2.769 | 1.00 | 53.70 | C0   |    |
| ANISOU12932 CB ARG E 15   | 8390    | 7040    | 4980   | -500 | 1570  | -160 | C0 |
| ATOM 12933 CG ARG E 15    | -22.226 | -6.768  | -4.252 | 1.00 | 55.37 | C0   |    |
| ANISOU12933 CG ARG E 15   | 8870    | 7200    | 4970   | -580 | 1620  | -170 | C0 |
| ATOM 12934 CD ARG E 15    | -21.656 | -7.887  | -5.105 | 1.00 | 56.04 | C0   |    |
| ANISOU12934 CD ARG E 15   | 9060    | 7240    | 5000   | -660 | 1800  | -260 | C0 |
| ATOM 12935 NE ARG E 15    | -20.419 | -8.424  | -4.556 | 1.00 | 55.49 | N0   |    |
| ANISOU12935 NE ARG E 15   | 8840    | 7130    | 5110   | -650 | 2010  | -300 | N0 |
| ATOM 12936 CZ ARG E 15    | -19.660 | -9.352  | -5.130 | 1.00 | 56.86 | C0   |    |
| ANISOU12936 CZ ARG E 15   | 9060    | 7250    | 5280   | -690 | 2210  | -380 | C0 |
| ATOM 12937 NH1 ARG E 15   | -18.560 | -9.758  | -4.516 | 1.00 | 56.70 | N0   |    |
| ANISOU12937 NH1 ARG E 15  | 8870    | 7220    | 5450   | -650 | 2380  | -410 | N0 |
| ATOM 12938 NH2 ARG E 15   | -19.991 | -9.872  | -6.302 | 1.00 | 58.14 | N0   |    |
| ANISOU12938 NH2 ARG E 15  | 9450    | 7390    | 5260   | -770 | 2240  | -450 | N0 |
| ATOM 12939 H ARG E 15     | -20.470 | -5.295  | -1.857 | 1.00 | 54.66 | H0   |    |
| ANISOU12939 H ARG E 15    | 8420    | 7090    | 5270   | -480 | 1740  | -70  | H0 |
| ATOM 12940 HA ARG E 15    | -23.255 | -5.409  | -2.049 | 1.00 | 53.31 | H0   |    |
| ANISOU12940 HA ARG E 15   | 8300    | 7040    | 4910   | -380 | 1320  | -50  | H0 |
| ATOM 12941 HB2 ARG E 15   | -21.527 | -7.621  | -2.510 | 1.00 | 53.52 | H0   |    |
| ANISOU12941 HB2 ARG E 15  | 8290    | 6990    | 5060   | -510 | 1710  | -200 | H0 |
| ATOM 12942 HB3 ARG E 15   | -23.104 | -7.667  | -2.621 | 1.00 | 53.55 | H0   |    |
| ANISOU12942 HB3 ARG E 15  | 8320    | 7070    | 4960   | -480 | 1470  | -190 | H0 |
| ATOM 12943 HG2 ARG E 15   | -23.124 | -6.548  | -4.583 | 1.00 | 55.68 | H0   |    |
| ANISOU12943 HG2 ARG E 15  | 8990    | 7280    | 4890   | -560 | 1470  | -150 | H0 |
| ATOM 12944 HG3 ARG E 15   | -21.666 | -5.973  | -4.367 | 1.00 | 55.58 | H0   |    |
| ANISOU12944 HG3 ARG E 15  | 8950    | 7190    | 4970   | -590 | 1680  | -130 | H0 |
| ATOM 12945 HD2 ARG E 15   | -22.318 | -8.608  | -5.174 | 1.00 | 56.15 | H0   |    |
| ANISOU12945 HD2 ARG E 15  | 9070    | 7280    | 4990   | -670 | 1730  | -300 | H0 |
| ATOM 12946 HD3 ARG E 15   | -21.486 | -7.547  | -6.009 | 1.00 | 57.28 | H0   |    |
| ANISOU12946 HD3 ARG E 15  | 9390    | 7360    | 5010   | -720 | 1850  | -260 | H0 |
| ATOM 12947 HE ARG E 15    | -20.151 | -8.115  | -3.788 | 1.00 | 54.76 | H0   |    |
| ANISOU12947 HE ARG E 15   | 8610    | 7050    | 5140   | -610 | 2000  | -270 | H0 |
| ATOM 12948 HH11 ARG E 15  | -18.336 | -9.410  | -3.740 | 1.00 | 55.75 | H0   |    |
| ANISOU12948 HH11 ARG E 15 | 8610    | 7120    | 5450   | -610 | 2360  | -370 | H0 |
| ATOM 12949 HH12 ARG E 15  | -18.050 | -10.368 | -4.889 | 1.00 | 57.40 | H0   |    |
| ANISOU12949 HH12 ARG E 15 | 8990    | 7270    | 5550   | -670 | 2520  | -470 | H0 |
| ATOM 12950 HH21 ARG E 15  | -20.724 | -9.610  | -6.712 | 1.00 | 58.52 | H0   |    |
| ANISOU12950 HH21 ARG E 15 | 9600    | 7460    | 5180   | -790 | 2120  | -430 | H0 |
| ATOM 12951 HH22 ARG E 15  | -19.478 | -10.488 | -6.668 | 1.00 | 58.93 | H0   |    |
| ANISOU12951 HH22 ARG E 15 | 9590    | 7450    | 5360   | -790 | 2390  | -510 | H0 |
| ATOM 12952 N PRO E 16     | -23.088 | -5.528  | 0.499  | 1.00 | 48.72 | N0   |    |
| ANISOU12952 N PRO E 16    | 7310    | 6530    | 4680   | -260 | 1290  | -40  | N0 |
| ATOM 12953 CA PRO E 16    | -23.044 | -5.776  | 1.941  | 1.00 | 47.10 | C0   |    |
| ANISOU12953 CA PRO E 16   | 6880    | 6370    | 4650   | -210 | 1260  | -30  | C0 |
| ATOM 12954 C PRO E 16     | -23.384 | -7.209  | 2.387  | 1.00 | 46.14 | C0   |    |
| ANISOU12954 C PRO E 16    | 6630    | 6290    | 4610   | -220 | 1270  | -80  | C0 |
| ATOM 12955 O PRO E 16     | -22.901 | -7.616  | 3.428  | 1.00 | 44.77 | O0   |    |
| ANISOU12955 O PRO E 16    | 6300    | 6120    | 4590   | -190 | 1310  | -80  | O0 |
| ATOM 12956 CB PRO E 16    | -24.109 | -4.810  | 2.488  | 1.00 | 47.07 | C0   |    |
| ANISOU12956 CB PRO E 16   | 6840    | 6420    | 4610   | -110 | 1070  | 10   | C0 |
| ATOM 12957 CG PRO E 16    | -24.119 | -3.680  | 1.489  | 1.00 | 48.16 | C0   |    |
| ANISOU12957 CG PRO E 16   | 7200    | 6500    | 4600   | -110 | 1040  | 50   | C0 |
| ATOM 12958 CD PRO E 16    | -23.920 | -4.365  | 0.155  | 1.00 | 49.40 | C0   |    |
| ANISOU12958 CD PRO E 16   | 7510    | 6620    | 4630   | -210 | 1130  | 20   | C0 |

|                          |         |         |        |      |       |      |    |
|--------------------------|---------|---------|--------|------|-------|------|----|
| ATOM 12959 HA PRO E 16   | -22.156 | -5.515  | 2.289  | 1.00 | 46.86 |      | H0 |
| ANISOU12959 HA PRO E 16  | 6810    | 6300    | 4700   | -220 | 1350  | -20  | H0 |
| ATOM 12960 HB2 PRO E 16  | -24.988 | -5.242  | 2.535  | 1.00 | 46.99 |      | H0 |
| ANISOU12960 HB2 PRO E 16 | 6790    | 6480    | 4580   | -90  | 980   | 0    | H0 |
| ATOM 12961 HB3 PRO E 16  | -23.865 | -4.486  | 3.381  | 1.00 | 46.30 |      | H0 |
| ANISOU12961 HB3 PRO E 16 | 6650    | 6330    | 4610   | -70  | 1070  | 30   | H0 |
| ATOM 12962 HG2 PRO E 16  | -24.972 | -3.200  | 1.512  | 1.00 | 48.44 |      | H0 |
| ANISOU12962 HG2 PRO E 16 | 7250    | 6570    | 4580   | -50  | 910   | 70   | H0 |
| ATOM 12963 HG3 PRO E 16  | -23.393 | -3.048  | 1.669  | 1.00 | 48.18 |      | H0 |
| ANISOU12963 HG3 PRO E 16 | 7230    | 6440    | 4630   | -120 | 1110  | 80   | H0 |
| ATOM 12964 HD2 PRO E 16  | -24.771 | -4.643  | -0.230 | 1.00 | 49.75 |      | H0 |
| ANISOU12964 HD2 PRO E 16 | 7590    | 6720    | 4600   | -200 | 1030  | 10   | H0 |
| ATOM 12965 HD3 PRO E 16  | -23.462 | -3.778  | -0.475 | 1.00 | 50.09 |      | H0 |
| ANISOU12965 HD3 PRO E 16 | 7750    | 6650    | 4640   | -240 | 1180  | 40   | H0 |
| ATOM 12966 N ASPE 17     | -24.193 | -7.927  | 1.602  | 1.00 | 46.37 |      | N0 |
| ANISOU12966 N ASPE 17    | 6740    | 6350    | 4530   | -260 | 1220  | -120 | N0 |
| ATOM 12967 CA ASPE 17    | -24.722 | -9.274  | 1.947  | 1.00 | 46.34 |      | C0 |
| ANISOU12967 CA ASPE 17   | 6650    | 6380    | 4580   | -300 | 1200  | -170 | C0 |
| ATOM 12968 C ASPE 17     | -23.924 | -10.383 | 1.249  | 1.00 | 46.72 |      | C0 |
| ANISOU12968 C ASPE 17    | 6790    | 6330    | 4630   | -370 | 1370  | -230 | C0 |
| ATOM 12969 O ASPE 17     | -24.326 | -11.547 | 1.386  | 1.00 | 46.80 |      | O0 |
| ANISOU12969 O ASPE 17    | 6780    | 6340    | 4660   | -410 | 1370  | -280 | O0 |
| ATOM 12970 CB ASPE 17    | -26.206 | -9.358  | 1.589  | 1.00 | 47.34 |      | C0 |
| ANISOU12970 CB ASPE 17   | 6790    | 6610    | 4590   | -320 | 1030  | -180 | C0 |
| ATOM 12971 CG ASPE 17    | -27.057 | -8.394  | 2.392  | 1.00 | 47.38 |      | C0 |
| ANISOU12971 CG ASPE 17   | 6680    | 6720    | 4610   | -220 | 870   | -130 | C0 |
| ATOM 12972 OD1 ASPE 17   | -26.725 | -8.165  | 3.577  | 1.00 | 46.37 |      | O0 |
| ANISOU12972 OD1 ASPE 17  | 6410    | 6600    | 4620   | -160 | 890   | -100 | O0 |
| ATOM 12973 OD2 ASPE 17   | -28.037 | -7.873  | 1.826  | 1.00 | 48.79 |      | O0 |
| ANISOU12973 OD2 ASPE 17  | 6900    | 6970    | 4670   | -200 | 720   | -120 | O0 |
| ATOM 12974 H ASPE 17     | -24.487 | -7.624  | 0.796  | 1.00 | 47.28 |      | H0 |
| ANISOU12974 H ASPE 17    | 6980    | 6460    | 4530   | -280 | 1180  | -120 | H0 |
| ATOM 12975 HA ASPE 17    | -24.635 | -9.398  | 2.921  | 1.00 | 45.52 |      | H0 |
| ANISOU12975 HA ASPE 17   | 6410    | 6290    | 4590   | -260 | 1200  | -150 | H0 |
| ATOM 12976 HB2 ASPE 17   | -26.322 | -9.161  | 0.638  | 1.00 | 48.27 |      | H0 |
| ANISOU12976 HB2 ASPE 17  | 7050    | 6710    | 4580   | -350 | 1010  | -190 | H0 |
| ATOM 12977 HB3 ASPE 17   | -26.528 | -10.267 | 1.756  | 1.00 | 47.44 |      | H0 |
| ANISOU12977 HB3 ASPE 17  | 6760    | 6630    | 4620   | -360 | 1030  | -220 | H0 |
| ATOM 12978 N VAL E 18    | -22.837 | -10.047 | 0.547  | 1.00 | 47.28 |      | N0 |
| ANISOU12978 N VAL E 18   | 6970    | 6320    | 4670   | -380 | 1520  | -240 | N0 |
| ATOM 12979 CA VAL E 18   | -21.989 | -11.028 | -0.197 | 1.00 | 48.75 |      | C0 |
| ANISOU12979 CA VAL E 18  | 7250    | 6420    | 4850   | -430 | 1700  | -310 | C0 |
| ATOM 12980 C VAL E 18    | -20.555 | -10.920 | 0.322  | 1.00 | 48.94 |      | C0 |
| ANISOU12980 C VAL E 18   | 7170    | 6400    | 5030   | -390 | 1870  | -300 | C0 |
| ATOM 12981 O VAL E 18    | -19.990 | -9.825  | 0.263  | 1.00 | 49.75 |      | O0 |
| ANISOU12981 O VAL E 18   | 7270    | 6510    | 5130   | -380 | 1900  | -250 | O0 |
| ATOM 12982 CB VAL E 18   | -22.051 | -10.798 | -1.720 | 1.00 | 49.54 |      | C0 |
| ANISOU12982 CB VAL E 18  | 7590    | 6490    | 4750   | -510 | 1750  | -340 | C0 |
| ATOM 12983 CG1 VAL E 18  | -21.307 | -11.886 | -2.478 | 1.00 | 50.72 |      | C0 |
| ANISOU12983 CG1 VAL E 18 | 7850    | 6540    | 4880   | -560 | 1940  | -430 | C0 |
| ATOM 12984 CG2 VAL E 18  | -23.487 | -10.687 | -2.212 | 1.00 | 49.83 |      | C0 |
| ANISOU12984 CG2 VAL E 18 | 7720    | 6590    | 4620   | -550 | 1540  | -340 | C0 |
| ATOM 12985 H VAL E 18    | -22.540 | -9.190  | 0.477  | 1.00 | 47.37 |      | H0 |
| ANISOU12985 H VAL E 18   | 7000    | 6330    | 4660   | -370 | 1520  | -200 | H0 |

|                           |         |         |        |      |       |      |    |
|---------------------------|---------|---------|--------|------|-------|------|----|
| ATOM 12986 HA VAL E 18    | -22.318 | -11.924 | -0.009 | 1.00 | 48.64 | H0   |    |
| ANISOU12986 HA VAL E 18   | 7220    | 6400    | 4870   | -450 | 1690  | -340 | H0 |
| ATOM 12987 HB VAL E 18    | -21.600 | -9.938  | -1.908 | 1.00 | 49.75 | H0   |    |
| ANISOU12987 HB VAL E 18   | 7650    | 6510    | 4750   | -500 | 1780  | -310 | H0 |
| ATOM 12988 HG11 VAL E 18  | -20.350 | -11.789 | -2.331 | 1.00 | 50.75 | H0   |    |
| ANISOU12988 HG11 VAL E 18 | 7800    | 6520    | 4970   | -530 | 2070  | -430 | H0 |
| ATOM 12989 HG12 VAL E 18  | -21.497 | -11.809 | -3.429 | 1.00 | 51.73 | H0   |    |
| ANISOU12989 HG12 VAL E 18 | 8140    | 6660    | 4860   | -610 | 1950  | -460 | H0 |
| ATOM 12990 HG13 VAL E 18  | -21.596 | -12.759 | -2.160 | 1.00 | 50.62 | H0   |    |
| ANISOU12990 HG13 VAL E 18 | 7800    | 6520    | 4920   | -560 | 1920  | -470 | H0 |
| ATOM 12991 HG21 VAL E 18  | -24.002 | -11.445 | -1.884 | 1.00 | 49.71 | H0   |    |
| ANISOU12991 HG21 VAL E 18 | 7650    | 6600    | 4640   | -560 | 1490  | -370 | H0 |
| ATOM 12992 HG22 VAL E 18  | -23.499 | -10.685 | -3.185 | 1.00 | 50.95 | H0   |    |
| ANISOU12992 HG22 VAL E 18 | 8020    | 6710    | 4630   | -600 | 1570  | -370 | H0 |
| ATOM 12993 HG23 VAL E 18  | -23.881 | -9.861  | -1.882 | 1.00 | 49.39 | H0   |    |
| ANISOU12993 HG23 VAL E 18 | 7620    | 6590    | 4560   | -510 | 1440  | -290 | H0 |
| ATOM 12994 N ILE E 19     | -20.004 | -12.020 | 0.832  | 1.00 | 49.91 | N0   |    |
| ANISOU12994 N ILE E 19    | 7200    | 6480    | 5290   | -350 | 1960  | -330 | N0 |
| ATOM 12995 CA ILE E 19    | -18.602 | -12.093 | 1.338  | 1.00 | 50.77 | C0   |    |
| ANISOU12995 CA ILE E 19   | 7170    | 6560    | 5560   | -290 | 2120  | -330 | C0 |
| ATOM 12996 C ILE E 19     | -17.654 | -11.872 | 0.153  | 1.00 | 52.54 | C0   |    |
| ANISOU12996 C ILE E 19    | 7510    | 6740    | 5710   | -330 | 2310  | -370 | C0 |
| ATOM 12997 O ILE E 19     | -17.727 | -12.580 | -0.849 | 1.00 | 53.08 | O0   |    |
| ANISOU12997 O ILE E 19    | 7740    | 6750    | 5680   | -370 | 2400  | -450 | O0 |
| ATOM 12998 CB ILE E 19    | -18.372 | -13.418 | 2.101  | 1.00 | 51.06 | C0   |    |
| ANISOU12998 CB ILE E 19   | 7110    | 6550    | 5740   | -230 | 2150  | -350 | C0 |
| ATOM 12999 CG1 ILE E 19   | -17.032 | -13.418 | 2.839  | 1.00 | 51.79 | C0   |    |
| ANISOU12999 CG1 ILE E 19  | 7020    | 6640    | 6020   | -140 | 2260  | -330 | C0 |
| ATOM 13000 CG2 ILE E 19   | -18.511 | -14.640 | 1.200  | 1.00 | 52.40 | C0   |    |
| ANISOU13000 CG2 ILE E 19  | 7440    | 6620    | 5840   | -260 | 2250  | -440 | C0 |
| ATOM 13001 CD1 ILE E 19   | -16.960 | -14.420 | 3.971  | 1.00 | 51.61 | C0   |    |
| ANISOU13001 CD1 ILE E 19  | 6880    | 6590    | 6140   | -50  | 2220  | -310 | C0 |
| ATOM 13002 H ILE E 19     | -20.465 | -12.799 | 0.919  | 1.00 | 49.92 | H0   |    |
| ANISOU13002 H ILE E 19    | 7210    | 6460    | 5290   | -360 | 1930  | -360 | H0 |
| ATOM 13003 HA ILE E 19    | -18.478 | -11.364 | 1.968  | 1.00 | 50.02 | H0   |    |
| ANISOU13003 HA ILE E 19   | 6980    | 6510    | 5520   | -270 | 2060  | -280 | H0 |
| ATOM 13004 HB ILE E 19    | -19.080 | -13.481 | 2.789  | 1.00 | 50.31 | H0   |    |
| ANISOU13004 HB ILE E 19   | 6960    | 6480    | 5670   | -220 | 2030  | -320 | H0 |
| ATOM 13005 HG12 ILE E 19  | -16.319 | -13.617 | 2.197  | 1.00 | 52.70 | H0   |    |
| ANISOU13005 HG12 ILE E 19 | 7170    | 6720    | 6130   | -140 | 2400  | -370 | H0 |
| ATOM 13006 HG13 ILE E 19  | -16.870 | -12.521 | 3.201  | 1.00 | 51.09 | H0   |    |
| ANISOU13006 HG13 ILE E 19 | 6860    | 6610    | 5950   | -140 | 2210  | -280 | H0 |
| ATOM 13007 HG21 ILE E 19  | -19.310 | -14.556 | 0.652  | 1.00 | 52.53 | H0   |    |
| ANISOU13007 HG21 ILE E 19 | 7580    | 6650    | 5730   | -320 | 2170  | -460 | H0 |
| ATOM 13008 HG22 ILE E 19  | -18.581 | -15.441 | 1.747  | 1.00 | 52.32 | H0   |    |
| ANISOU13008 HG22 ILE E 19 | 7390    | 6570    | 5910   | -220 | 2230  | -450 | H0 |
| ATOM 13009 HG23 ILE E 19  | -17.732 | -14.712 | 0.623  | 1.00 | 53.32 | H0   |    |
| ANISOU13009 HG23 ILE E 19 | 7600    | 6700    | 5960   | -250 | 2390  | -480 | H0 |
| ATOM 13010 HD11 ILE E 19  | -17.610 | -14.185 | 4.657  | 1.00 | 50.60 | H0   |    |
| ANISOU13010 HD11 ILE E 19 | 6700    | 6500    | 6020   | -60  | 2090  | -270 | H0 |
| ATOM 13011 HD12 ILE E 19  | -16.068 | -14.409 | 4.354  | 1.00 | 51.79 | H0   |    |
| ANISOU13011 HD12 ILE E 19 | 6790    | 6620    | 6280   | 10   | 2280  | -300 | H0 |
| ATOM 13012 HD13 ILE E 19  | -17.156 | -15.310 | 3.632  | 1.00 | 52.18 | H0   |    |
| ANISOU13012 HD13 ILE E 19 | 7040    | 6590    | 6200   | -50  | 2260  | -360 | H0 |

|                           |         |         |        |      |       |      |    |
|---------------------------|---------|---------|--------|------|-------|------|----|
| ATOM 13013 N PRO E 20     | -16.770 | -10.847 | 0.196  | 1.00 | 53.26 | N0   |    |
| ANISOU13013 N PRO E 20    | 7540    | 6860    | 5840   | -340 | 2380  | -340 | N0 |
| ATOM 13014 CA PRO E 20    | -15.908 | -10.522 | -0.943 | 1.00 | 55.68 | C0   |    |
| ANISOU13014 CA PRO E 20   | 7960    | 7140    | 6060   | -410 | 2580  | -370 | C0 |
| ATOM 13015 C PRO E 20     | -14.664 | -11.422 | -1.014 | 1.00 | 58.04 | C0   |    |
| ANISOU13015 C PRO E 20    | 8160    | 7410    | 6490   | -360 | 2800  | -440 | C0 |
| ATOM 13016 O PRO E 20     | -13.562 | -10.929 | -0.853 | 1.00 | 58.53 | O0   |    |
| ANISOU13016 O PRO E 20    | 8090    | 7510    | 6640   | -360 | 2920  | -430 | O0 |
| ATOM 13017 CB PRO E 20    | -15.535 | -9.064  | -0.644 | 1.00 | 54.87 | C0   |    |
| ANISOU13017 CB PRO E 20   | 7810    | 7080    | 5960   | -450 | 2550  | -300 | C0 |
| ATOM 13018 CG PRO E 20    | -15.422 | -9.041  | 0.865  | 1.00 | 53.52 | C0   |    |
| ANISOU13018 CG PRO E 20   | 7400    | 6960    | 5980   | -370 | 2440  | -250 | C0 |
| ATOM 13019 CD PRO E 20    | -16.554 | -9.934  | 1.333  | 1.00 | 52.21 | C0   |    |
| ANISOU13019 CD PRO E 20   | 7240    | 6780    | 5820   | -310 | 2290  | -260 | C0 |
| ATOM 13020 HA PRO E 20    | -16.426 | -10.572 | -1.785 | 1.00 | 56.21 | H0   |    |
| ANISOU13020 HA PRO E 20   | 8200    | 7180    | 5970   | -460 | 2570  | -400 | H0 |
| ATOM 13021 HB2 PRO E 20   | -14.685 | -8.818  | -1.066 | 1.00 | 55.96 | H0   |    |
| ANISOU13021 HB2 PRO E 20  | 7950    | 7220    | 6100   | -490 | 2690  | -310 | H0 |
| ATOM 13022 HB3 PRO E 20   | -16.235 | -8.451  | -0.953 | 1.00 | 54.80 | H0   |    |
| ANISOU13022 HB3 PRO E 20  | 7920    | 7070    | 5830   | -490 | 2440  | -270 | H0 |
| ATOM 13023 HG2 PRO E 20   | -14.557 | -9.393  | 1.157  | 1.00 | 53.82 | H0   |    |
| ANISOU13023 HG2 PRO E 20  | 7310    | 7000    | 6130   | -340 | 2540  | -270 | H0 |
| ATOM 13024 HG3 PRO E 20   | -15.530 | -8.131  | 1.210  | 1.00 | 52.94 | H0   |    |
| ANISOU13024 HG3 PRO E 20  | 7310    | 6910    | 5900   | -390 | 2360  | -200 | H0 |
| ATOM 13025 HD2 PRO E 20   | -16.304 | -10.428 | 2.135  | 1.00 | 51.82 | H0   |    |
| ANISOU13025 HD2 PRO E 20  | 7050    | 6750    | 5890   | -250 | 2280  | -250 | H0 |
| ATOM 13026 HD3 PRO E 20   | -17.357 | -9.412  | 1.518  | 1.00 | 51.57 | H0   |    |
| ANISOU13026 HD3 PRO E 20  | 7190    | 6730    | 5670   | -320 | 2150  | -220 | H0 |
| ATOM 13027 N THR E 21     | -14.867 | -12.721 | -1.243 | 1.00 | 60.20 | N0   |    |
| ANISOU13027 N THR E 21    | 8490    | 7620    | 6770   | -310 | 2840  | -510 | N0 |
| ATOM 13028 CA THR E 21    | -13.780 | -13.723 | -1.395 | 1.00 | 63.25 | C0   |    |
| ANISOU13028 CA THR E 21   | 8810    | 7960    | 7270   | -230 | 3050  | -590 | C0 |
| ATOM 13029 C THR E 21     | -13.048 | -13.478 | -2.715 | 1.00 | 66.24 | C0   |    |
| ANISOU13029 C THR E 21    | 9310    | 8330    | 7530   | -300 | 3280  | -660 | C0 |
| ATOM 13030 O THR E 21     | -13.681 | -12.954 | -3.656 | 1.00 | 65.94 | O0   |    |
| ANISOU13030 O THR E 21    | 9500    | 8280    | 7280   | -410 | 3250  | -660 | O0 |
| ATOM 13031 CB THR E 21    | -14.321 | -15.155 | -1.344 | 1.00 | 63.68 | C0   |    |
| ANISOU13031 CB THR E 21   | 8940    | 7910    | 7340   | -170 | 3030  | -650 | C0 |
| ATOM 13032 OG1 THR E 21   | -15.323 | -15.253 | -2.357 | 1.00 | 64.32 | O0   |    |
| ANISOU13032 OG1 THR E 21  | 9280    | 7960    | 7200   | -280 | 2980  | -690 | O0 |
| ATOM 13033 CG2 THR E 21   | -14.889 | -15.519 | 0.010  | 1.00 | 62.23 | C0   |    |
| ANISOU13033 CG2 THR E 21  | 8620    | 7740    | 7280   | -100 | 2840  | -580 | C0 |
| ATOM 13034 H THR E 21     | -15.695 | -13.087 | -1.336 | 1.00 | 59.86 | H0   |    |
| ANISOU13034 H THR E 21    | 8540    | 7550    | 6660   | -320 | 2750  | -520 | H0 |
| ATOM 13035 HA THR E 21    | -13.144 | -13.599 | -0.653 | 1.00 | 62.91 | H0   |    |
| ANISOU13035 HA THR E 21   | 8580    | 7950    | 7370   | -170 | 3060  | -560 | H0 |
| ATOM 13036 HB THR E 21    | -13.584 | -15.775 | -1.560 | 1.00 | 64.90 | H0   |    |
| ANISOU13036 HB THR E 21   | 9080    | 8030    | 7560   | -110 | 3180  | -700 | H0 |
| ATOM 13037 HG21 THR E 21  | -14.163 | -15.614 | 0.652  | 1.00 | 62.21 | H0   |    |
| ANISOU13037 HG21 THR E 21 | 8460    | 7750    | 7430   | -20  | 2880  | -560 | H0 |
| ATOM 13038 HG22 THR E 21  | -15.375 | -16.361 | -0.056 | 1.00 | 62.42 | H0   |    |
| ANISOU13038 HG22 THR E 21 | 8740    | 7690    | 7290   | -100 | 2820  | -620 | H0 |
| ATOM 13039 HG23 THR E 21  | -15.495 | -14.818 | 0.308  | 1.00 | 61.06 | H0   |    |
| ANISOU13039 HG23 THR E 21 | 8460    | 7650    | 7090   | -150 | 2710  | -530 | H0 |



|                           |         |         |         |      |       |       |    |
|---------------------------|---------|---------|---------|------|-------|-------|----|
| ATOM 13040 N GLN E 22     | -11.766 | -13.851 | -2.759  | 1.00 | 69.45 | N0    |    |
| ANISOU13040 N GLN E 22    | 9580    | 8740    | 8060    | -230 | 3500  | -710  | N0 |
| ATOM 13041 CA GLN E 22    | -10.891 | -13.789 | -3.958  | 1.00 | 72.69 | C0    |    |
| ANISOU13041 CA GLN E 22   | 10080   | 9150    | 8380    | -280 | 3760  | -790  | C0 |
| ATOM 13042 C GLN E 22     | -10.350 | -15.197 | -4.231  | 1.00 | 74.83 | C0    |    |
| ANISOU13042 C GLN E 22    | 10360   | 9350    | 8730    | -150 | 3940  | -900  | C0 |
| ATOM 13043 O GLN E 22     | -9.742  | -15.771 | -3.309  | 1.00 | 74.56 | O0    |    |
| ANISOU13043 O GLN E 22    | 10090   | 9320    | 8920    | 0    | 3950  | -890  | O0 |
| ATOM 13044 CB GLN E 22    | -9.758  | -12.786 | -3.725  | 1.00 | 74.00 | C0    |    |
| ANISOU13044 CB GLN E 22   | 10040   | 9430    | 8640    | -320 | 3870  | -740  | C0 |
| ATOM 13045 CG GLN E 22    | -9.208  | -12.170 | -5.005  | 1.00 | 76.83 | C0    |    |
| ANISOU13045 CG GLN E 22   | 10550   | 9810    | 8830    | -450 | 4090  | -790  | C0 |
| ATOM 13046 CD GLN E 22    | -10.073 | -11.063 | -5.563  | 1.00 | 76.95 | C0    |    |
| ANISOU13046 CD GLN E 22   | 10800   | 9820    | 8620    | -610 | 3970  | -720  | C0 |
| ATOM 13047 OE1 GLN E 22   | -10.998 | -10.575 | -4.916  | 1.00 | 74.88 | O0    |    |
| ANISOU13047 OE1 GLN E 22  | 10550   | 9550    | 8350    | -620 | 3720  | -630  | O0 |
| ATOM 13048 NE2 GLN E 22   | -9.766  | -10.645 | -6.782  | 1.00 | 79.09 | N0    |    |
| ANISOU13048 NE2 GLN E 22  | 11270   | 10080   | 8700    | -740 | 4150  | -750  | N0 |
| ATOM 13049 H GLN E 22     | -11.337 | -14.177 | -2.025  | 1.00 | 69.05 | H0    |    |
| ANISOU13049 H GLN E 22    | 9360    | 8710    | 8170    | -140 | 3490  | -690  | H0 |
| ATOM 13050 HA GLN E 22    | -11.428 | -13.495 | -4.729  | 1.00 | 72.95 | H0    |    |
| ANISOU13050 HA GLN E 22   | 10320   | 9160    | 8240    | -370 | 3750  | -800  | H0 |
| ATOM 13051 HB2 GLN E 22   | -10.089 | -12.072 | -3.141  | 1.00 | 72.72 | H0    |    |
| ANISOU13051 HB2 GLN E 22  | 9830    | 9310    | 8500    | -350 | 3720  | -670  | H0 |
| ATOM 13052 HB3 GLN E 22   | -9.030  | -13.242 | -3.253  | 1.00 | 74.55 | H0    |    |
| ANISOU13052 HB3 GLN E 22  | 9930    | 9530    | 8870    | -220 | 3950  | -770  | H0 |
| ATOM 13053 HG2 GLN E 22   | -8.312  | -11.813 | -4.827  | 1.00 | 77.54 | H0    |    |
| ANISOU13053 HG2 GLN E 22  | 10470   | 9970    | 9020    | -460 | 4210  | -780  | H0 |
| ATOM 13054 HG3 GLN E 22   | -9.118  | -12.873 | -5.683  | 1.00 | 78.01 | H0    |    |
| ANISOU13054 HG3 GLN E 22  | 10810   | 9910    | 8920    | -430 | 4220  | -870  | H0 |
| ATOM 13055 HE21 GLN E 22  | -10.103 | -9.887  | -7.088  | 1.00 | 78.83 | H0    |    |
| ANISOU13055 HE21 GLN E 22 | 11360   | 10050   | 8550    | -830 | 4090  | -700  | H0 |
| ATOM 13056 HE22 GLN E 22  | -9.225  | -11.124 | -7.292  | 1.00 | 80.40 | H0    |    |
| ANISOU13056 HE22 GLN E 22 | 11440   | 10250   | 8860    | -720 | 4330  | -820  | H0 |
| ATOM 13057 N ARG E 23     | -10.599 | -15.729 | -5.436  | 1.00 | 77.23 | N0    |    |
| ANISOU13057 N ARG E 23    | 10920   | 9570    | 8850    | -200 | 4070  | -1000 | N0 |
| ATOM 13058 CA ARG E 23    | -10.057 | -17.018 | -5.956  | 1.00 | 80.12 | C0    |    |
| ANISOU13058 CA ARG E 23   | 11360   | 9840    | 9250    | -90  | 4280  | -1130 | C0 |
| ATOM 13059 C ARG E 23     | -10.192 | -18.124 | -4.896  | 1.00 | 79.88 | C0    |    |
| ANISOU13059 C ARG E 23    | 11210   | 9730    | 9420    | 80   | 4180  | -1130 | C0 |
| ATOM 13060 O ARG E 23     | -9.197  | -18.834 | -4.638  | 1.00 | 81.51 | O0    |    |
| ANISOU13060 O ARG E 23    | 11270   | 9910    | 9790    | 250  | 4330  | -1180 | O0 |
| ATOM 13061 CB ARG E 23    | -8.604  | -16.827 | -6.406  | 1.00 | 82.55 | C0    |    |
| ANISOU13061 CB ARG E 23   | 11520   | 10220   | 9630    | -40  | 4580  | -1190 | C0 |
| ATOM 13062 CG ARG E 23    | -8.414  | -15.725 | -7.441  | 1.00 | 83.65 | C0    |    |
| ANISOU13062 CG ARG E 23   | 11780   | 10430   | 9560    | -230 | 4700  | -1190 | C0 |
| ATOM 13063 CD ARG E 23    | -7.038  | -15.744 | -8.086  | 1.00 | 86.27 | C0    |    |
| ANISOU13063 CD ARG E 23   | 12010   | 10830   | 9940    | -210 | 5040  | -1280 | C0 |
| ATOM 13064 NE ARG E 23    | -6.868  | -16.879 | -8.989  | 1.00 | 88.74 | N0    |    |
| ANISOU13064 NE ARG E 23   | 12510   | 11040   | 10170   | -130 | 5250  | -1430 | N0 |
| ATOM 13065 CZ ARG E 23    | -6.430  | -16.823 | -10.251 | 1.00 | 91.14 | C0    |    |
| ANISOU13065 CZ ARG E 23   | 12990   | 11350   | 10290   | -220 | 5520  | -1530 | C0 |
| ATOM 13066 NH1 ARG E 23   | -6.083  | -15.675 | -10.813 | 1.00 | 91.53 | N0    |    |
| ANISOU13066 NH1 ARG E 23  | 13060   | 11510   | 10210   | -390 | 5620  | -1480 | N0 |

|                           |         |         |         |      |       |       |    |
|---------------------------|---------|---------|---------|------|-------|-------|----|
| ATOM 13067 NH2 ARG E 23   | -6.330  | -17.940 | -10.952 | 1.00 | 93.02 |       | N0 |
| ANISOU13067 NH2 ARG E 23  | 13410   | 11480   | 10460   | -130 | 5700  | -1670 | N0 |
| ATOM 13068 H ARG E 23     | -11.142 | -15.313 | -6.037  | 1.00 | 77.11 |       | H0 |
| ANISOU13068 H ARG E 23    | 11080   | 9550    | 8670    | -300 | 4030  | -990  | H0 |
| ATOM 13069 HA ARG E 23    | -10.593 | -17.277 | -6.741  | 1.00 | 80.66 |       | H0 |
| ANISOU13069 HA ARG E 23   | 11660   | 9840    | 9150    | -160 | 4300  | -1190 | H0 |
| ATOM 13070 HB2 ARG E 23   | -8.058  | -16.618 | -5.620  | 1.00 | 82.12 |       | H0 |
| ANISOU13070 HB2 ARG E 23  | 11220   | 10230   | 9750    | 30   | 4560  | -1140 | H0 |
| ATOM 13071 HB3 ARG E 23   | -8.280  | -17.672 | -6.781  | 1.00 | 84.04 |       | H0 |
| ANISOU13071 HB3 ARG E 23  | 11760   | 10340   | 9830    | 40   | 4720  | -1280 | H0 |
| ATOM 13072 HG2 ARG E 23   | -9.093  | -15.822 | -8.142  | 1.00 | 83.73 |       | H0 |
| ANISOU13072 HG2 ARG E 23  | 12040   | 10380   | 9390    | -310 | 4670  | -1220 | H0 |
| ATOM 13073 HG3 ARG E 23   | -8.550  | -14.854 | -7.011  | 1.00 | 82.33 |       | H0 |
| ANISOU13073 HG3 ARG E 23  | 11530   | 10330   | 9410    | -300 | 4580  | -1090 | H0 |
| ATOM 13074 HD2 ARG E 23   | -6.906  | -14.908 | -8.579  | 1.00 | 86.72 |       | H0 |
| ANISOU13074 HD2 ARG E 23  | 12120   | 10950   | 9880    | -340 | 5100  | -1250 | H0 |
| ATOM 13075 HD3 ARG E 23   | -6.355  | -15.788 | -7.383  | 1.00 | 86.39 |       | H0 |
| ANISOU13075 HD3 ARG E 23  | 11770   | 10910   | 10150   | -110 | 5070  | -1260 | H0 |
| ATOM 13076 HE ARG E 23    | -7.078  | -17.666 | -8.680  | 1.00 | 88.52 |       | H0 |
| ANISOU13076 HE ARG E 23   | 12490   | 10930   | 10210   | -30  | 5210  | -1460 | H0 |
| ATOM 13077 HH11 ARG E 23  | -6.142  | -14.925 | -10.365 | 1.00 | 90.41 |       | H0 |
| ANISOU13077 HH11 ARG E 23 | 12820   | 11420   | 10100   | -450 | 5500  | -1390 | H0 |
| ATOM 13078 HH12 ARG E 23  | -5.796  | -15.666 | -11.644 | 1.00 | 93.28 |       | H0 |
| ANISOU13078 HH12 ARG E 23 | 13410   | 11730   | 10300   | -450 | 5800  | -1550 | H0 |
| ATOM 13079 HH21 ARG E 23  | -6.555  | -18.710 | -10.587 | 1.00 | 92.79 |       | H0 |
| ANISOU13079 HH21 ARG E 23 | 13380   | 11360   | 10510   | -20  | 5630  | -1700 | H0 |
| ATOM 13080 HH22 ARG E 23  | -6.039  | -17.913 | -11.783 | 1.00 | 94.73 |       | H0 |
| ANISOU13080 HH22 ARG E 23 | 13740   | 11700   | 10550   | -190 | 5880  | -1740 | H0 |
| ATOM 13081 N ASPE 24      | -11.386 | -18.256 | -4.309  | 1.00 | 78.29 |       | N0 |
| ANISOU13081 N ASPE 24     | 11080   | 9480    | 9180    | 40   | 3920  | -1060 | N0 |
| ATOM 13082 CA ASPE 24     | -11.760 | -19.309 | -3.322  | 1.00 | 78.11 |       | C0 |
| ANISOU13082 CA ASPE 24    | 11010   | 9370    | 9300    | 160  | 3790  | -1050 | C0 |
| ATOM 13083 C ASPE 24      | -10.810 | -19.292 | -2.112  | 1.00 | 76.92 |       | C0 |
| ANISOU13083 C ASPE 24     | 10540   | 9280    | 9410    | 320  | 3790  | -980  | C0 |
| ATOM 13084 O ASPE 24      | -10.654 | -20.353 | -1.475  | 1.00 | 77.98 |       | O0 |
| ANISOU13084 O ASPE 24     | 10630   | 9310    | 9680    | 470  | 3780  | -990  | O0 |
| ATOM 13085 CB ASPE 24     | -11.821 | -20.682 | -3.999  | 1.00 | 81.01 |       | C0 |
| ANISOU13085 CB ASPE 24    | 11600   | 9560    | 9620    | 220  | 3920  | -1180 | C0 |
| ATOM 13086 CG ASPE 24     | -13.139 | -20.941 | -4.708  | 1.00 | 81.35 |       | C0 |
| ANISOU13086 CG ASPE 24    | 11950   | 9530    | 9430    | 50   | 3810  | -1220 | C0 |
| ATOM 13087 OD1 ASPE 24    | -14.148 | -21.159 | -4.003  | 1.00 | 79.67 |       | O0 |
| ANISOU13087 OD1 ASPE 24   | 11750   | 9300    | 9230    | 10   | 3590  | -1160 | O0 |
| ATOM 13088 OD2 ASPE 24    | -13.148 | -20.909 | -5.957  | 1.00 | 83.31 |       | O0 |
| ANISOU13088 OD2 ASPE 24   | 12410   | 9750    | 9490    | -40  | 3940  | -1310 | O0 |
| ATOM 13089 H ASPE 24      | -12.073 | -17.686 | -4.489  | 1.00 | 77.41 |       | H0 |
| ANISOU13089 H ASPE 24     | 11060   | 9400    | 8950    | -70  | 3800  | -1030 | H0 |
| ATOM 13090 HA ASPE 24     | -12.667 | -19.100 | -2.995  | 1.00 | 76.62 |       | H0 |
| ANISOU13090 HA ASPE 24    | 10860   | 9190    | 9060    | 90   | 3610  | -990  | H0 |
| ATOM 13091 HB2 ASPE 24    | -11.097 | -20.752 | -4.654  | 1.00 | 82.47 |       | H0 |
| ANISOU13091 HB2 ASPE 24   | 11810   | 9740    | 9790    | 250  | 4120  | -1250 | H0 |
| ATOM 13092 HB3 ASPE 24    | -11.695 | -21.384 | -3.329  | 1.00 | 80.96 |       | H0 |
| ANISOU13092 HB3 ASPE 24   | 11530   | 9490    | 9740    | 330  | 3890  | -1170 | H0 |
| ATOM 13093 N ARG E 25     | -10.220 | -18.134 | -1.790  | 1.00 | 75.00 |       | N0 |
| ANISOU13093 N ARG E 25    | 10090   | 9180    | 9230    | 290  | 3790  | -910  | N0 |

|                           |         |         |        |      |       |          |
|---------------------------|---------|---------|--------|------|-------|----------|
| ATOM 13094 CA ARG E 25    | -9.434  | -17.911 | -0.545 | 1.00 | 73.29 | C0       |
| ANISOU13094 CA ARG E 25   | 9550    | 9060    | 9240   | 410  | 3730  | -830 C0  |
| ATOM 13095 C ARG E 25     | -10.368 | -17.321 | 0.511  | 1.00 | 68.04 | C0       |
| ANISOU13095 C ARG E 25    | 8840    | 8440    | 8580   | 340  | 3450  | -710 C0  |
| ATOM 13096 O ARG E 25     | -11.362 | -16.679 | 0.169  | 1.00 | 65.28 | O0       |
| ANISOU13096 O ARG E 25    | 8640    | 8100    | 8060   | 200  | 3340  | -690 O0  |
| ATOM 13097 CB ARG E 25    | -8.237  | -16.985 | -0.801 | 1.00 | 75.62 | C0       |
| ANISOU13097 CB ARG E 25   | 9650    | 9490    | 9590   | 380  | 3890  | -830 C0  |
| ATOM 13098 CG ARG E 25    | -7.206  | -17.521 | -1.787 | 1.00 | 80.17 | C0       |
| ANISOU13098 CG ARG E 25   | 10220   | 10060   | 10180  | 450  | 4190  | -950 C0  |
| ATOM 13099 CD ARG E 25    | -6.609  | -18.868 | -1.399 | 1.00 | 83.00 | C0       |
| ANISOU13099 CD ARG E 25   | 10490   | 10330   | 10720  | 690  | 4270  | -1010 C0 |
| ATOM 13100 NE ARG E 25    | -6.375  | -18.981 | 0.039  | 1.00 | 83.53 | N0       |
| ANISOU13100 NE ARG E 25   | 10310   | 10440   | 10990  | 820  | 4090  | -910 N0  |
| ATOM 13101 CZ ARG E 25    | -5.222  | -18.744 | 0.667  | 1.00 | 85.09 | C0       |
| ANISOU13101 CZ ARG E 25   | 10180   | 10770   | 11380  | 930  | 4130  | -880 C0  |
| ATOM 13102 NH1 ARG E 25   | -4.141  | -18.380 | -0.005 | 1.00 | 87.27 | N0       |
| ANISOU13102 NH1 ARG E 25  | 10310   | 11150   | 11690  | 930  | 4370  | -950 N0  |
| ATOM 13103 NH2 ARG E 25   | -5.159  | -18.879 | 1.982  | 1.00 | 84.19 | N0       |
| ANISOU13103 NH2 ARG E 25  | 9890    | 10680   | 11420  | 1030 | 3940  | -790 N0  |
| ATOM 13104 H ARG E 25     | -10.279 | -17.392 | -2.312 | 1.00 | 74.93 | H0       |
| ANISOU13104 H ARG E 25    | 10130   | 9230    | 9110   | 180  | 3810  | -910 H0  |
| ATOM 13105 HA ARG E 25    | -9.103  | -18.780 | -0.227 | 1.00 | 74.05 | H0       |
| ANISOU13105 HA ARG E 25   | 9600    | 9090    | 9450   | 540  | 3760  | -860 H0  |
| ATOM 13106 HB2 ARG E 25   | -8.575  | -16.129 | -1.136 | 1.00 | 75.02 | H0       |
| ANISOU13106 HB2 ARG E 25  | 9640    | 9470    | 9400   | 250  | 3850  | -810 H0  |
| ATOM 13107 HB3 ARG E 25   | -7.792  | -16.812 | 0.055  | 1.00 | 75.36 | H0       |
| ANISOU13107 HB3 ARG E 25  | 9400    | 9530    | 9700   | 450  | 3830  | -780 H0  |
| ATOM 13108 HG2 ARG E 25   | -7.626  | -17.609 | -2.669 | 1.00 | 80.45 | H0       |
| ANISOU13108 HG2 ARG E 25  | 10480   | 10030   | 10060  | 380  | 4260  | -1010 H0 |
| ATOM 13109 HG3 ARG E 25   | -6.477  | -16.870 | -1.870 | 1.00 | 80.67 | H0       |
| ANISOU13109 HG3 ARG E 25  | 10140   | 10230   | 10280  | 420  | 4280  | -950 H0  |
| ATOM 13110 HD2 ARG E 25   | -7.224  | -19.580 | -1.678 | 1.00 | 83.07 | H0       |
| ANISOU13110 HD2 ARG E 25  | 10700   | 10210   | 10650  | 710  | 4250  | -1050 H0 |
| ATOM 13111 HD3 ARG E 25   | -5.766  | -18.998 | -1.881 | 1.00 | 84.89 | H0       |
| ANISOU13111 HD3 ARG E 25  | 10660   | 10600   | 11000  | 750  | 4470  | -1080 H0 |
| ATOM 13112 HE ARG E 25    | -7.050  | -19.220 | 0.532  | 1.00 | 82.07 | H0       |
| ANISOU13112 HE ARG E 25   | 10200   | 10190   | 10790  | 820  | 3940  | -870 H0  |
| ATOM 13113 HH11 ARG E 25  | -4.171  | -18.281 | -0.875 | 1.00 | 87.85 | H0       |
| ANISOU13113 HH11 ARG E 25 | 10520   | 11210   | 11650  | 850  | 4500  | -1010 H0 |
| ATOM 13114 HH12 ARG E 25  | -3.390  | -18.227 | 0.428  | 1.00 | 87.90 | H0       |
| ANISOU13114 HH12 ARG E 25 | 10160   | 11330   | 11900  | 990  | 4390  | -930 H0  |
| ATOM 13115 HH21 ARG E 25  | -5.874  | -19.127 | 2.434  | 1.00 | 82.90 | H0       |
| ANISOU13115 HH21 ARG E 25 | 9820    | 10440   | 11230  | 1030 | 3800  | -740 H0  |
| ATOM 13116 HH22 ARG E 25  | -4.400  | -18.729 | 2.403  | 1.00 | 84.88 | H0       |
| ANISOU13116 HH22 ARG E 25 | 9760    | 10860   | 11630  | 1100 | 3960  | -770 H0  |
| ATOM 13117 N PRO E 26     | -10.099 | -17.531 | 1.820  | 1.00 | 64.95 | N0       |
| ANISOU13117 N PRO E 26    | 8240    | 8070    | 8370   | 460  | 3330  | -640 N0  |
| ATOM 13118 CA PRO E 26    | -10.902 | -16.912 | 2.870  | 1.00 | 62.34 | C0       |
| ANISOU13118 CA PRO E 26   | 7850    | 7800    | 8040   | 400  | 3090  | -530 C0  |
| ATOM 13119 C PRO E 26     | -10.611 | -15.409 | 2.952  | 1.00 | 60.98 | C0       |
| ANISOU13119 C PRO E 26    | 7560    | 7770    | 7840   | 290  | 3060  | -480 C0  |
| ATOM 13120 O PRO E 26     | -9.484  | -15.015 | 2.693  | 1.00 | 61.66 | O0       |
| ANISOU13120 O PRO E 26    | 7510    | 7920    | 8000   | 300  | 3200  | -500 O0  |

|             |               |         |         |       |      |       |      |    |
|-------------|---------------|---------|---------|-------|------|-------|------|----|
| ATOM 13121  | CB PRO E 26   | -10.475 | -17.632 | 4.160 | 1.00 | 62.35 | C0   |    |
| ANISOU13121 | CB PRO E 26   | 7670    | 7780    | 8230  | 560  | 3000  | -480 | C0 |
| ATOM 13122  | CG PRO E 26   | -9.090  | -18.171 | 3.866 | 1.00 | 64.55 | C0   |    |
| ANISOU13122 | CG PRO E 26   | 7810    | 8060    | 8650  | 710  | 3210  | -540 | C0 |
| ATOM 13123  | CD PRO E 26   | -9.023  | -18.370 | 2.365 | 1.00 | 66.16 | C0   |    |
| ANISOU13123 | CD PRO E 26   | 8210    | 8210    | 8720  | 660  | 3420  | -650 | C0 |
| ATOM 13124  | HA PRO E 26   | -11.864 | -17.073 | 2.697 | 1.00 | 61.55 | H0   |    |
| ANISOU13124 | HA PRO E 26   | 7910    | 7650    | 7830  | 340  | 3000  | -530 | H0 |
| ATOM 13125  | HB2 PRO E 26  | -10.451 | -17.009 | 4.917 | 1.00 | 61.37 | H0   |    |
| ANISOU13125 | HB2 PRO E 26  | 7420    | 7740    | 8150  | 550  | 2890  | -410 | H0 |
| ATOM 13126  | HB3 PRO E 26  | -11.093 | -18.361 | 4.373 | 1.00 | 62.07 | H0   |    |
| ANISOU13126 | HB3 PRO E 26  | 7740    | 7660    | 8180  | 590  | 2940  | -470 | H0 |
| ATOM 13127  | HG2 PRO E 26  | -8.405  | -17.537 | 4.158 | 1.00 | 64.80 | H0   |    |
| ANISOU13127 | HG2 PRO E 26  | 7660    | 8200    | 8750  | 720  | 3220  | -510 | H0 |
| ATOM 13128  | HG3 PRO E 26  | -8.947  | -19.021 | 4.330 | 1.00 | 65.19 | H0   |    |
| ANISOU13128 | HG3 PRO E 26  | 7880    | 8070    | 8820  | 840  | 3190  | -530 | H0 |
| ATOM 13129  | HD2 PRO E 26  | -8.157  | -18.087 | 2.018 | 1.00 | 67.38 | H0   |    |
| ANISOU13129 | HD2 PRO E 26  | 8250    | 8430    | 8920  | 680  | 3550  | -690 | H0 |
| ATOM 13130  | HD3 PRO E 26  | -9.164  | -19.306 | 2.132 | 1.00 | 67.01 | H0   |    |
| ANISOU13130 | HD3 PRO E 26  | 8430    | 8200    | 8830  | 730  | 3460  | -700 | H0 |
| ATOM 13131  | N VAL E 27    | -11.631 | -14.617 | 3.289 | 1.00 | 58.58 | N0   |    |
| ANISOU13131 | N VAL E 27    | 7320    | 7490    | 7440  | 190  | 2880  | -420 | N0 |
| ATOM 13132  | CA VAL E 27   | -11.476 | -13.179 | 3.655 | 1.00 | 57.50 | C0   |    |
| ANISOU13132 | CA VAL E 27   | 7090    | 7470    | 7290  | 100  | 2800  | -350 | C0 |
| ATOM 13133  | C VAL E 27    | -10.715 | -13.136 | 4.984 | 1.00 | 56.43 | C0   |    |
| ANISOU13133 | C VAL E 27    | 6690    | 7400    | 7350  | 190  | 2730  | -290 | C0 |
| ATOM 13134  | O VAL E 27    | -11.277 | -13.582 | 5.998 | 1.00 | 55.42 | O0   |    |
| ANISOU13134 | O VAL E 27    | 6530    | 7260    | 7270  | 250  | 2580  | -250 | O0 |
| ATOM 13135  | CB VAL E 27   | -12.832 | -12.456 | 3.740 | 1.00 | 56.11 | C0   |    |
| ANISOU13135 | CB VAL E 27   | 7060    | 7290    | 6970  | 0    | 2620  | -300 | C0 |
| ATOM 13136  | CG1 VAL E 27  | -12.680 | -11.039 | 4.270 | 1.00 | 55.59 | C0   |    |
| ANISOU13136 | CG1 VAL E 27  | 6900    | 7310    | 6910  | -70  | 2530  | -240 | C0 |
| ATOM 13137  | CG2 VAL E 27  | -13.543 | -12.454 | 2.394 | 1.00 | 56.76 | C0   |    |
| ANISOU13137 | CG2 VAL E 27  | 7390    | 7320    | 6860  | -90  | 2670  | -360 | C0 |
| ATOM 13138  | H VAL E 27    | -12.492 | -14.913 | 3.326 | 1.00 | 57.98 | H0   |    |
| ANISOU13138 | H VAL E 27    | 7360    | 7370    | 7300  | 170  | 2790  | -410 | H0 |
| ATOM 13139  | HA VAL E 27   | -10.935 | -12.745 | 2.972 | 1.00 | 58.33 | H0   |    |
| ANISOU13139 | HA VAL E 27   | 7200    | 7590    | 7360  | 50   | 2930  | -380 | H0 |
| ATOM 13140  | HB VAL E 27   | -13.397 | -12.958 | 4.379 | 1.00 | 55.39 | H0   |    |
| ANISOU13140 | HB VAL E 27   | 6950    | 7180    | 6910  | 50   | 2510  | -280 | H0 |
| ATOM 13141  | HG11 VAL E 27 | -12.569 | -11.062 | 5.236 | 1.00 | 54.94 | H0   |    |
| ANISOU13141 | HG11 VAL E 27 | 6690    | 7260    | 6920  | -20  | 2450  | -200 | H0 |
| ATOM 13142  | HG12 VAL E 27 | -13.473 | -10.521 | 4.049 | 1.00 | 54.84 | H0   |    |
| ANISOU13142 | HG12 VAL E 27 | 6930    | 7210    | 6700  | -120 | 2450  | -220 | H0 |
| ATOM 13143  | HG13 VAL E 27 | -11.899 | -10.623 | 3.864 | 1.00 | 56.42 | H0   |    |
| ANISOU13143 | HG13 VAL E 27 | 6970    | 7440    | 7020  | -100 | 2650  | -250 | H0 |
| ATOM 13144  | HG21 VAL E 27 | -12.972 | -12.035 | 1.726 | 1.00 | 57.59 | H0   |    |
| ANISOU13144 | HG21 VAL E 27 | 7520    | 7430    | 6920  | -130 | 2790  | -380 | H0 |
| ATOM 13145  | HG22 VAL E 27 | -14.375 | -11.955 | 2.466 | 1.00 | 55.79 | H0   |    |
| ANISOU13145 | HG22 VAL E 27 | 7340    | 7210    | 6650  | -130 | 2540  | -320 | H0 |
| ATOM 13146  | HG23 VAL E 27 | -13.737 | -13.369 | 2.126 | 1.00 | 57.15 | H0   |    |
| ANISOU13146 | HG23 VAL E 27 | 7510    | 7310    | 6900  | -50  | 2710  | -400 | H0 |
| ATOM 13147  | N ALA E 28    | -9.464  | -12.673 | 4.955 | 1.00 | 56.80 | N0   |    |
| ANISOU13147 | N ALA E 28    | 6560    | 7530    | 7490  | 190  | 2850  | -300 | N0 |

|                           |                                   |    |
|---------------------------|-----------------------------------|----|
| ATOM 13148 CA ALA E 28    | -8.552 -12.623 6.121 1.00 56.83   | C0 |
| ANISOU13148 CA ALA E 28   | 6280 7630 7680 270 2790 -260      | C0 |
| ATOM 13149 C ALA E 28     | -8.929 -11.421 6.990 1.00 54.96   | C0 |
| ANISOU13149 C ALA E 28    | 6010 7460 7420 170 2610 -180      | C0 |
| ATOM 13150 O ALA E 28     | -8.650 -10.275 6.583 1.00 55.17   | O0 |
| ANISOU13150 O ALA E 28    | 6040 7540 7380 30 2660 -180       | O0 |
| ATOM 13151 CB ALA E 28    | -7.111 -12.559 5.671 1.00 58.90   | C0 |
| ANISOU13151 CB ALA E 28   | 6360 7970 8050 290 2990 -310      | C0 |
| ATOM 13152 H ALA E 28     | -9.075 -12.345 4.200 1.00 57.78   | H0 |
| ANISOU13152 H ALA E 28    | 6710 7670 7570 130 2970 -340      | H0 |
| ATOM 13153 HA ALA E 28    | -8.681 -13.441 6.650 1.00 56.70   | H0 |
| ANISOU13153 HA ALA E 28   | 6240 7570 7730 380 2730 -250      | H0 |
| ATOM 13154 HB1 ALA E 28   | -6.529 -12.513 6.449 1.00 59.23   | H0 |
| ANISOU13154 HB1 ALA E 28  | 6210 8090 8210 340 2930 -280      | H0 |
| ATOM 13155 HB2 ALA E 28   | -6.896 -13.353 5.154 1.00 59.94   | H0 |
| ANISOU13155 HB2 ALA E 28  | 6520 8050 8200 370 3110 -360      | H0 |
| ATOM 13156 HB3 ALA E 28   | -6.976 -11.769 5.121 1.00 59.14   | H0 |
| ANISOU13156 HB3 ALA E 28  | 6430 8040 8010 170 3060 -320      | H0 |
| ATOM 13157 N VAL E 29     | -9.558 -11.681 8.135 1.00 52.86   | N0 |
| ANISOU13157 N VAL E 29    | 5720 7190 7180 230 2420 -130      | N0 |
| ATOM 13158 CA VAL E 29    | -9.965 -10.626 9.105 1.00 51.65   | C0 |
| ANISOU13158 CA VAL E 29   | 5530 7090 7000 160 2250 -60       | C0 |
| ATOM 13159 C VAL E 29     | -8.918 -10.574 10.221 1.00 52.50  | C0 |
| ANISOU13159 C VAL E 29    | 5380 7300 7270 210 2190 -30       | C0 |
| ATOM 13160 O VAL E 29     | -8.562 -11.640 10.744 1.00 53.23  | O0 |
| ANISOU13160 O VAL E 29    | 5370 7380 7470 350 2170 -10       | O0 |
| ATOM 13161 CB VAL E 29    | -11.383 -10.885 9.644 1.00 49.34  | C0 |
| ANISOU13161 CB VAL E 29   | 5380 6750 6620 170 2090 -30       | C0 |
| ATOM 13162 CG1 VAL E 29   | -11.829 -9.797 10.607 1.00 48.33  | C0 |
| ANISOU13162 CG1 VAL E 29  | 5230 6680 6460 110 1920 30        | C0 |
| ATOM 13163 CG2 VAL E 29   | -12.378 -11.037 8.505 1.00 48.77  | C0 |
| ANISOU13163 CG2 VAL E 29  | 5530 6600 6400 120 2130 -70       | C0 |
| ATOM 13164 H VAL E 29     | -9.781 -12.524 8.397 1.00 53.04   | H0 |
| ANISOU13164 H VAL E 29    | 5750 7160 7240 320 2400 -120      | H0 |
| ATOM 13165 HA VAL E 29    | -9.965 -9.770 8.644 1.00 51.52    | H0 |
| ANISOU13165 HA VAL E 29   | 5560 7090 6920 60 2280 -70        | H0 |
| ATOM 13166 HB VAL E 29    | -11.360 -11.739 10.141 1.00 49.58 | H0 |
| ANISOU13166 HB VAL E 29   | 5360 6760 6720 260 2060 -10       | H0 |
| ATOM 13167 HG11 VAL E 29  | -11.351 -9.892 11.450 1.00 48.46  | H0 |
| ANISOU13167 HG11 VAL E 29 | 5110 6740 6560 150 1870 50        | H0 |
| ATOM 13168 HG12 VAL E 29  | -12.785 -9.877 10.769 1.00 47.35  | H0 |
| ANISOU13168 HG12 VAL E 29 | 5200 6530 6270 110 1840 40        | H0 |
| ATOM 13169 HG13 VAL E 29  | -11.638 -8.924 10.223 1.00 48.43  | H0 |
| ANISOU13169 HG13 VAL E 29 | 5260 6710 6430 30 1950 20         | H0 |
| ATOM 13170 HG21 VAL E 29  | -12.302 -10.277 7.903 1.00 48.99  | H0 |
| ANISOU13170 HG21 VAL E 29 | 5620 6630 6360 40 2180 -80        | H0 |
| ATOM 13171 HG22 VAL E 29  | -13.282 -11.075 8.865 1.00 47.87  | H0 |
| ANISOU13171 HG22 VAL E 29 | 5480 6470 6230 120 2030 -40       | H0 |
| ATOM 13172 HG23 VAL E 29  | -12.191 -11.857 8.016 1.00 49.55  | H0 |
| ANISOU13172 HG23 VAL E 29 | 5660 6650 6520 170 2220 -100      | H0 |
| ATOM 13173 N SER E 30     | -8.412 -9.378 10.523 1.00 53.40   | N0 |
| ANISOU13173 N SER E 30    | 5400 7500 7390 100 2160 -10       | N0 |
| ATOM 13174 CA SER E 30    | -7.559 -9.093 11.704 1.00 54.93   | C0 |
| ANISOU13174 CA SER E 30   | 5360 7800 7700 110 2050 30        | C0 |

|                           |         |         |        |      |       |     |    |
|---------------------------|---------|---------|--------|------|-------|-----|----|
| ATOM 13175 C SER E 30     | -8.448  | -8.519  | 12.810 | 1.00 | 53.93 | C0  |    |
| ANISOU13175 C SER E 30    | 5310    | 7670    | 7510   | 80   | 1850  | 80  | C0 |
| ATOM 13176 O SER E 30     | -9.275  | -7.639  | 12.504 | 1.00 | 52.49 | O0  |    |
| ANISOU13176 O SER E 30    | 5300    | 7450    | 7200   | -20  | 1820  | 80  | O0 |
| ATOM 13177 CB SER E 30    | -6.429  | -8.166  | 11.355 | 1.00 | 56.46 | C0  |    |
| ANISOU13177 CB SER E 30   | 5420    | 8090    | 7940   | -10  | 2150  | 0   | C0 |
| ATOM 13178 OG SER E 30    | -5.651  | -8.699  | 10.292 | 1.00 | 59.26 | O0  |    |
| ANISOU13178 OG SER E 30   | 5710    | 8460    | 8350   | 10   | 2370  | -60 | O0 |
| ATOM 13179 H SER E 30     | -8.558  | -8.635  | 10.017 | 1.00 | 53.31 | H0  |    |
| ANISOU13179 H SER E 30    | 5480    | 7480    | 7300   | 0    | 2190  | -20 | H0 |
| ATOM 13180 HA SER E 30    | -7.175  | -9.951  | 12.023 | 1.00 | 55.53 | H0  |    |
| ANISOU13180 HA SER E 30   | 5340    | 7890    | 7870   | 230  | 2050  | 30  | H0 |
| ATOM 13181 HB2 SER E 30   | -6.792  | -7.295  | 11.094 | 1.00 | 56.19 | H0  |    |
| ANISOU13181 HB2 SER E 30  | 5500    | 8040    | 7820   | -130 | 2150  | 0   | H0 |
| ATOM 13182 HB3 SER E 30   | -5.859  | -8.037  | 12.145 | 1.00 | 57.30 | H0  |    |
| ANISOU13182 HB3 SER E 30  | 5360    | 8280    | 8130   | -10  | 2080  | 20  | H0 |
| ATOM 13183 N VAL E 31     | -8.316  | -9.037  | 14.032 | 1.00 | 55.28 | N0  |    |
| ANISOU13183 N VAL E 31    | 5360    | 7890    | 7750   | 180  | 1710  | 130 | N0 |
| ATOM 13184 CA VAL E 31    | -9.127  | -8.616  | 15.213 | 1.00 | 55.01 | C0  |    |
| ANISOU13184 CA VAL E 31   | 5390    | 7860    | 7650   | 160  | 1520  | 180 | C0 |
| ATOM 13185 C VAL E 31     | -8.165  | -8.218  | 16.332 | 1.00 | 56.80 | C0  |    |
| ANISOU13185 C VAL E 31    | 5410    | 8200    | 7970   | 150  | 1410  | 200 | C0 |
| ATOM 13186 O VAL E 31     | -7.146  | -8.900  | 16.502 | 1.00 | 58.64 | O0  |    |
| ANISOU13186 O VAL E 31    | 5450    | 8500    | 8330   | 230  | 1430  | 210 | O0 |
| ATOM 13187 CB VAL E 31    | -10.098 | -9.722  | 15.662 | 1.00 | 54.66 | C0  |    |
| ANISOU13187 CB VAL E 31   | 5440    | 7750    | 7580   | 270  | 1450  | 210 | C0 |
| ATOM 13188 CG1 VAL E 31   | -10.925 | -9.288  | 16.865 | 1.00 | 54.17 | C0  |    |
| ANISOU13188 CG1 VAL E 31  | 5440    | 7710    | 7440   | 250  | 1280  | 250 | C0 |
| ATOM 13189 CG2 VAL E 31   | -11.003 | -10.163 | 14.523 | 1.00 | 54.15 | C0  |    |
| ANISOU13189 CG2 VAL E 31  | 5560    | 7580    | 7430   | 270  | 1560  | 170 | C0 |
| ATOM 13190 H VAL E 31     | -7.712  | -9.691  | 14.225 | 1.00 | 56.08 | H0  |    |
| ANISOU13190 H VAL E 31    | 5340    | 8010    | 7950   | 260  | 1730  | 130 | H0 |
| ATOM 13191 HA VAL E 31    | -9.648  | -7.835  | 14.964 | 1.00 | 54.36 | H0  |    |
| ANISOU13191 HA VAL E 31   | 5420    | 7760    | 7480   | 70   | 1520  | 160 | H0 |
| ATOM 13192 HB VAL E 31    | -9.554  | -10.501 | 15.935 | 1.00 | 55.52 | H0  |    |
| ANISOU13192 HB VAL E 31   | 5450    | 7860    | 7780   | 370  | 1460  | 230 | H0 |
| ATOM 13193 HG11 VAL E 31  | -10.369 | -9.299  | 17.663 | 1.00 | 54.53 | H0  |    |
| ANISOU13193 HG11 VAL E 31 | 5370    | 7810    | 7540   | 270  | 1210  | 280 | H0 |
| ATOM 13194 HG12 VAL E 31  | -11.673 | -9.899  | 16.984 | 1.00 | 53.37 | H0  |    |
| ANISOU13194 HG12 VAL E 31 | 5420    | 7560    | 7300   | 300  | 1260  | 270 | H0 |
| ATOM 13195 HG13 VAL E 31  | -11.263 | -8.387  | 16.718 | 1.00 | 53.44 | H0  |    |
| ANISOU13195 HG13 VAL E 31 | 5410    | 7620    | 7280   | 170  | 1270  | 240 | H0 |
| ATOM 13196 HG21 VAL E 31  | -11.466 | -9.390  | 14.157 | 1.00 | 53.49 | H0  |    |
| ANISOU13196 HG21 VAL E 31 | 5570    | 7490    | 7260   | 190  | 1560  | 160 | H0 |
| ATOM 13197 HG22 VAL E 31  | -11.656 | -10.804 | 14.855 | 1.00 | 53.58 | H0  |    |
| ANISOU13197 HG22 VAL E 31 | 5560    | 7470    | 7330   | 320  | 1510  | 190 | H0 |
| ATOM 13198 HG23 VAL E 31  | -10.469 | -10.581 | 13.825 | 1.00 | 54.94 | H0  |    |
| ANISOU13198 HG23 VAL E 31 | 5640    | 7660    | 7580   | 300  | 1670  | 140 | H0 |
| ATOM 13199 N SER E 32     | -8.482  | -7.136  | 17.042 | 1.00 | 57.49 | N0  |    |
| ANISOU13199 N SER E 32    | 5540    | 8320    | 7980   | 40   | 1300  | 210 | N0 |
| ATOM 13200 CA SER E 32    | -7.689  | -6.585  | 18.170 | 1.00 | 59.21 | C0  |    |
| ANISOU13200 CA SER E 32   | 5600    | 8640    | 8250   | -10  | 1170  | 230 | C0 |
| ATOM 13201 C SER E 32     | -8.623  | -5.813  | 19.106 | 1.00 | 58.40 | C0  |    |
| ANISOU13201 C SER E 32    | 5650    | 8520    | 8020   | -60  | 1020  | 250 | C0 |

|                           |         |        |        |      |       |     |    |
|---------------------------|---------|--------|--------|------|-------|-----|----|
| ATOM 13202 O SER E 32     | -9.357  | -4.935 | 18.611 | 1.00 | 57.83 | O0  |    |
| ANISOU13202 O SER E 32    | 5750    | 8380   | 7840   | -140 | 1060  | 220 | O0 |
| ATOM 13203 CB SER E 32    | -6.570  | -5.715 | 17.663 | 1.00 | 61.17 | C0  |    |
| ANISOU13203 CB SER E 32   | 5720    | 8970   | 8550   | -150 | 1250  | 190 | C0 |
| ATOM 13204 OG SER E 32    | -5.662  | -5.403 | 18.706 | 1.00 | 63.16 | O0  |    |
| ANISOU13204 OG SER E 32   | 5780    | 9340   | 8870   | -190 | 1120  | 210 | O0 |
| ATOM 13205 H SER E 32     | -9.230  | -6.642 | 16.878 | 1.00 | 56.42 | H0  |    |
| ANISOU13205 H SER E 32    | 5550    | 8140   | 7750   | -10  | 1290  | 210 | H0 |
| ATOM 13206 HA SER E 32    | -7.296  | -7.347 | 18.674 | 1.00 | 59.83 | H0  |    |
| ANISOU13206 HA SER E 32   | 5570    | 8760   | 8400   | 90   | 1120  | 260 | H0 |
| ATOM 13207 HB2 SER E 32   | -6.094  | -6.184 | 16.941 | 1.00 | 61.97 | H0  |    |
| ANISOU13207 HB2 SER E 32  | 5750    | 9070   | 8720   | -110 | 1370  | 180 | H0 |
| ATOM 13208 HB3 SER E 32   | -6.943  | -4.885 | 17.295 | 1.00 | 60.72 | H0  |    |
| ANISOU13208 HB3 SER E 32  | 5790    | 8860   | 8410   | -250 | 1280  | 170 | H0 |
| ATOM 13209 N LEU E 33     | -8.621  | -6.160 | 20.396 | 1.00 | 58.66 | N0  |    |
| ANISOU13209 N LEU E 33    | 5620    | 8610   | 8060   | 0    | 870   | 290 | N0 |
| ATOM 13210 CA LEU E 33    | -9.354  | -5.423 | 21.458 | 1.00 | 57.80 | C0  |    |
| ANISOU13210 CA LEU E 33   | 5620    | 8500   | 7830   | -50  | 730   | 300 | C0 |
| ATOM 13211 C LEU E 33     | -8.385  | -4.470 | 22.163 | 1.00 | 59.41 | C0  |    |
| ANISOU13211 C LEU E 33    | 5720    | 8800   | 8060   | -170 | 640   | 280 | C0 |
| ATOM 13212 O LEU E 33     | -7.389  | -4.957 | 22.740 | 1.00 | 62.26 | O0  |    |
| ANISOU13212 O LEU E 33    | 5880    | 9260   | 8510   | -140 | 570   | 310 | O0 |
| ATOM 13213 CB LEU E 33    | -9.965  | -6.423 | 22.443 | 1.00 | 57.21 | C0  |    |
| ANISOU13213 CB LEU E 33   | 5580    | 8430   | 7730   | 70   | 630   | 360 | C0 |
| ATOM 13214 CG LEU E 33    | -10.880 | -7.484 | 21.834 | 1.00 | 56.39 | C0  |    |
| ANISOU13214 CG LEU E 33   | 5580    | 8240   | 7610   | 170  | 720   | 380 | C0 |
| ATOM 13215 CD1 LEU E 33   | -11.707 | -8.154 | 22.924 | 1.00 | 55.99 | C0  |    |
| ANISOU13215 CD1 LEU E 33  | 5600    | 8190   | 7490   | 230  | 610   | 430 | C0 |
| ATOM 13216 CD2 LEU E 33   | -11.783 | -6.893 | 20.757 | 1.00 | 54.94 | C0  |    |
| ANISOU13216 CD2 LEU E 33  | 5550    | 7980   | 7350   | 110  | 820   | 330 | C0 |
| ATOM 13217 H LEU E 33     | -8.166  | -6.884 | 20.705 | 1.00 | 59.30 | H0  |    |
| ANISOU13217 H LEU E 33    | 5590    | 8730   | 8210   | 80   | 840   | 320 | H0 |
| ATOM 13218 HA LEU E 33    | -10.068 | -4.897 | 21.039 | 1.00 | 56.98 | H0  |    |
| ANISOU13218 HA LEU E 33   | 5660    | 8340   | 7650   | -90  | 770   | 270 | H0 |
| ATOM 13219 HB2 LEU E 33   | -9.236  | -6.877 | 22.911 | 1.00 | 58.27 | H0  |    |
| ANISOU13219 HB2 LEU E 33  | 5580    | 8620   | 7930   | 110  | 580   | 390 | H0 |
| ATOM 13220 HB3 LEU E 33   | -10.475 | -5.922 | 23.111 | 1.00 | 56.85 | H0  |    |
| ANISOU13220 HB3 LEU E 33  | 5610    | 8390   | 7600   | 30   | 560   | 360 | H0 |
| ATOM 13221 HG LEU E 33    | -10.312 | -8.172 | 21.410 | 1.00 | 56.93 | H0  |    |
| ANISOU13221 HG LEU E 33   | 5560    | 8300   | 7770   | 230  | 770   | 390 | H0 |
| ATOM 13222 HD11 LEU E 33  | -11.122 | -8.434 | 23.649 | 1.00 | 56.79 | H0  |    |
| ANISOU13222 HD11 LEU E 33 | 5620    | 8340   | 7620   | 270  | 530   | 470 | H0 |
| ATOM 13223 HD12 LEU E 33  | -12.161 | -8.931 | 22.557 | 1.00 | 55.56 | H0  |    |
| ANISOU13223 HD12 LEU E 33 | 5600    | 8080   | 7440   | 290  | 670   | 450 | H0 |
| ATOM 13224 HD13 LEU E 33  | -12.367 | -7.525 | 23.264 | 1.00 | 55.31 | H0  |    |
| ANISOU13224 HD13 LEU E 33 | 5600    | 8100   | 7310   | 190  | 580   | 410 | H0 |
| ATOM 13225 HD21 LEU E 33  | -12.119 | -6.029 | 21.052 | 1.00 | 54.70 | H0  |    |
| ANISOU13225 HD21 LEU E 33 | 5580    | 7960   | 7250   | 50   | 780   | 310 | H0 |
| ATOM 13226 HD22 LEU E 33  | -12.532 | -7.492 | 20.596 | 1.00 | 54.36 | H0  |    |
| ANISOU13226 HD22 LEU E 33 | 5550    | 7860   | 7240   | 160  | 840   | 340 | H0 |
| ATOM 13227 HD23 LEU E 33  | -11.278 | -6.781 | 19.933 | 1.00 | 55.42 | H0  |    |
| ANISOU13227 HD23 LEU E 33 | 5570    | 8030   | 7460   | 90   | 910   | 300 | H0 |
| ATOM 13228 N LYS E 34     | -8.648  | -3.164 | 22.070 | 1.00 | 58.90 | N0  |    |
| ANISOU13228 N LYS E 34    | 5780    | 8700   | 7900   | -310 | 640   | 240 | N0 |

|                         |        |        |        |       |       |     |    |
|-------------------------|--------|--------|--------|-------|-------|-----|----|
| ATOM 13229 CA LYSE 34   | -7.980 | -2.104 | 22.870 | 1.00  | 59.98 |     | C0 |
| ANISOU13229 CA LYSE 34  | 5870   | 8900   | 8020   | -450  | 530   | 210 | C0 |
| ATOM 13230 C LYSE 34    | -8.926 | -1.724 | 24.012 | 1.00  | 57.56 |     | C0 |
| ANISOU13230 C LYSE 34   | 5720   | 8570   | 7580   | -440  | 400   | 210 | C0 |
| ATOM 13231 O LYSE 34    | -9.983 | -1.127 | 23.728 | 1.00  | 55.98 |     | O0 |
| ANISOU13231 O LYSE 34   | 5730   | 8270   | 7270   | -440  | 440   | 180 | O0 |
| ATOM 13232 CB LYSE 34   | -7.622 | -0.897 | 21.996 | 1.00  | 61.57 |     | C0 |
| ANISOU13232 CB LYSE 34  | 6140   | 9050   | 8210   | -630  | 630   | 160 | C0 |
| ATOM 13233 CG LYSE 34   | -6.392 | -1.080 | 21.117 | 1.00  | 64.31 |     | C0 |
| ANISOU13233 CG LYSE 34  | 6290   | 9460   | 8680   | -690  | 750   | 150 | C0 |
| ATOM 13234 CD LYSE 34   | -5.087 | -0.912 | 21.862 | 1.00  | 67.33 |     | C0 |
| ANISOU13234 CD LYSE 34  | 6430   | 10000  | 9160   | -790  | 650   | 140 | C0 |
| ATOM 13235 CE LYSE 34   | -3.873 | -0.914 | 20.956 | 1.00  | 69.83 |     | C0 |
| ANISOU13235 CE LYSE 34  | 6540   | 10400  | 9600   | -880  | 780   | 120 | C0 |
| ATOM 13236 NZ LYSE 34   | -3.386 | -2.288 | 20.689 | 1.00  | 70.73 |     | N0 |
| ANISOU13236 NZ LYSE 34  | 6440   | 10590  | 9850   | -700  | 840   | 150 | N0 |
| ATOM 13237 H LYSE 34    | -9.273 | -2.836 | 21.493 | 1.00  | 58.17 |     | H0 |
| ANISOU13237 H LYSE 34   | 5810   | 8530   | 7760   | -320  | 700   | 220 | H0 |
| ATOM 13238 HA LYSE 34   | -7.153 | -2.475 | 23.252 | 1.00  | 60.99 |     | H0 |
| ANISOU13238 HA LYSE 34  | 5830   | 9120   | 8230   | -450  | 480   | 230 | H0 |
| ATOM 13239 HB2 LYSE 34  | -8.388 | -0.693 | 21.420 | 1.00  | 60.62 |     | H0 |
| ANISOU13239 HB2 LYSE 34 | 6170   | 8840   | 8020   | -610  | 690   | 150 | H0 |
| ATOM 13240 HB3 LYSE 34  | -7.474 | -0.125 | 22.581 | 1.00  | 62.16 |     | H0 |
| ANISOU13240 HB3 LYSE 34 | 6250   | 9130   | 8230   | -720  | 550   | 130 | H0 |
| ATOM 13241 HG2 LYSE 34  | -6.419 | -1.977 | 20.720 | 1.00  | 63.93 |     | H0 |
| ANISOU13241 HG2 LYSE 34 | 6180   | 9420   | 8690   | -580  | 800   | 170 | H0 |
| ATOM 13242 HG3 LYSE 34  | -6.428 | -0.428 | 20.386 | 1.00  | 64.28 |     | H0 |
| ANISOU13242 HG3 LYSE 34 | 6380   | 9400   | 8650   | -790  | 830   | 120 | H0 |
| ATOM 13243 HD2 LYSE 34  | -5.110 | -0.065 | 22.358 | 1.00  | 67.57 |     | H0 |
| ANISOU13243 HD2 LYSE 34 | 6540   | 10020  | 9120   | -900  | 580   | 120 | H0 |
| ATOM 13244 HD3 LYSE 34  | -4.996 | -1.639 | 22.514 | 1.00  | 67.35 |     | H0 |
| ANISOU13244 HD3 LYSE 34 | 6330   | 10060  | 9200   | -680  | 560   | 180 | H0 |
| ATOM 13245 HE2 LYSE 34  | -4.098 | -0.488 | 20.107 | 1.00  | 69.43 |     | H0 |
| ANISOU13245 HE2 LYSE 34 | 6600   | 10270  | 9510   | -940  | 900   | 100 | H0 |
| ATOM 13246 HE3 LYSE 34  | -3.156 | -0.399 | 21.371 | 1.00  | 71.14 |     | H0 |
| ANISOU13246 HE3 LYSE 34 | 6590   | 10640  | 9790   | -1000 | 730   | 100 | H0 |
| ATOM 13247 HZ1 LYSE 34  | -3.106 | -2.671 | 21.463 | 1.00  | 71.10 |     | H0 |
| ANISOU13247 HZ1 LYSE 34 | 6370   | 10710  | 9930   | -640  | 720   | 180 | H0 |
| ATOM 13248 HZ2 LYSE 34  | -2.693 | -2.261 | 20.105 | 1.00  | 71.69 |     | H0 |
| ANISOU13248 HZ2 LYSE 34 | 6430   | 10760  | 10040  | -750  | 930   | 130 | H0 |
| ATOM 13249 HZ3 LYSE 34  | -4.054 | -2.789 | 20.335 | 1.00  | 69.41 |     | H0 |
| ANISOU13249 HZ3 LYSE 34 | 6380   | 10340  | 9650   | -590  | 890   | 170 | H0 |
| ATOM 13250 N PHE E 35   | -8.566 | -2.091 | 25.244 | 1.00  | 56.85 |     | N0 |
| ANISOU13250 N PHE E 35  | 5540   | 8570   | 7490   | -410  | 260   | 240 | N0 |
| ATOM 13251 CA PHE E 35  | -9.398 | -1.908 | 26.459 | 1.00  | 55.36 |     | C0 |
| ANISOU13251 CA PHE E 35 | 5490   | 8380   | 7160   | -390  | 140   | 250 | C0 |
| ATOM 13252 C PHE E 35   | -9.281 | -0.460 | 26.939 | 1.00  | 54.24 |     | C0 |
| ANISOU13252 C PHE E 35  | 5460   | 8220   | 6930   | -540  | 80    | 180 | C0 |
| ATOM 13253 O PHE E 35   | -8.160 | 0.010  | 27.205 | 1.00  | 55.56 |     | O0 |
| ANISOU13253 O PHE E 35  | 5500   | 8460   | 7140   | -670  | 10    | 160 | O0 |
| ATOM 13254 CB PHE E 35  | -9.012 | -2.944 | 27.516 | 1.00  | 57.15 |     | C0 |
| ANISOU13254 CB PHE E 35 | 5600   | 8700   | 7410   | -300  | 10    | 320 | C0 |
| ATOM 13255 CG PHE E 35  | -9.388 | -4.344 | 27.112 | 1.00  | 57.22 |     | C0 |
| ANISOU13255 CG PHE E 35 | 5570   | 8690   | 7480   | -140  | 80    | 380 | C0 |



|                           |         |        |        |      |       |     |
|---------------------------|---------|--------|--------|------|-------|-----|
| ATOM 13256 CD1 PHE E 35   | -10.709 | -4.761 | 27.165 | 1.00 | 56.31 | C0  |
| ANISOU13256 CD1 PHE E 35  | 5620    | 8500   | 7270   | -60  | 120   | 400 |
| ATOM 13257 CD2 PHE E 35   | -8.435  | -5.226 | 26.625 | 1.00 | 58.44 | C0  |
| ANISOU13257 CD2 PHE E 35  | 5540    | 8880   | 7790   | -60  | 110   | 420 |
| ATOM 13258 CE1 PHE E 35   | -11.065 | -6.041 | 26.766 | 1.00 | 56.22 | C0  |
| ANISOU13258 CE1 PHE E 35  | 5600    | 8450   | 7310   | 60   | 180   | 450 |
| ATOM 13259 CE2 PHE E 35   | -8.792  | -6.506 | 26.230 | 1.00 | 58.00 | C0  |
| ANISOU13259 CE2 PHE E 35  | 5480    | 8770   | 7780   | 80   | 170   | 480 |
| ATOM 13260 CZ PHE E 35    | -10.105 | -6.910 | 26.300 | 1.00 | 56.66 | C0  |
| ANISOU13260 CZ PHE E 35   | 5500    | 8520   | 7510   | 130  | 210   | 490 |
| ATOM 13261 H PHE E 35     | -7.765  | -2.484 | 25.429 | 1.00 | 57.94 | H0  |
| ANISOU13261 H PHE E 35    | 5530    | 8780   | 7700   | -410 | 220   | 270 |
| ATOM 13262 HA PHE E 35    | -10.342 | -2.069 | 26.207 | 1.00 | 54.22 | H0  |
| ANISOU13262 HA PHE E 35   | 5470    | 8170   | 6960   | -320 | 190   | 250 |
| ATOM 13263 HB2 PHE E 35   | -8.044  | -2.898 | 27.667 | 1.00 | 58.34 | H0  |
| ANISOU13263 HB2 PHE E 35  | 5600    | 8930   | 7630   | -340 | -40   | 320 |
| ATOM 13264 HB3 PHE E 35   | -9.462  | -2.719 | 28.357 | 1.00 | 57.02 | H0  |
| ANISOU13264 HB3 PHE E 35  | 5670    | 8700   | 7290   | -300 | -70   | 320 |
| ATOM 13265 HD1 PHE E 35   | -11.371 | -4.167 | 27.482 | 1.00 | 55.76 | H0  |
| ANISOU13265 HD1 PHE E 35  | 5670    | 8410   | 7110   | -90  | 110   | 370 |
| ATOM 13266 HD2 PHE E 35   | -7.532  | -4.955 | 26.573 | 1.00 | 59.51 | H0  |
| ANISOU13266 HD2 PHE E 35  | 5540    | 9080   | 7990   | -110 | 80    | 410 |
| ATOM 13267 HE1 PHE E 35   | -11.966 | -6.317 | 26.819 | 1.00 | 55.12 | H0  |
| ANISOU13267 HE1 PHE E 35  | 5560    | 8270   | 7110   | 100  | 210   | 460 |
| ATOM 13268 HE2 PHE E 35   | -8.132  | -7.101 | 25.912 | 1.00 | 58.74 | H0  |
| ANISOU13268 HE2 PHE E 35  | 5460    | 8890   | 7980   | 150  | 190   | 500 |
| ATOM 13269 HZ PHE E 35    | -10.346 | -7.784 | 26.034 | 1.00 | 56.47 | H0  |
| ANISOU13269 HZ PHE E 35   | 5480    | 8460   | 7520   | 220  | 250   | 520 |
| ATOM 13270 N ILE E 36     | -10.424 | 0.226  | 27.016 | 1.00 | 51.65 | N0  |
| ANISOU13270 N ILE E 36    | 5350    | 7800   | 6470   | -540 | 100   | 140 |
| ATOM 13271 CA ILE E 36    | -10.534 | 1.653  | 27.436 | 1.00 | 51.49 | C0  |
| ANISOU13271 CA ILE E 36   | 5500    | 7720   | 6350   | -660 | 60    | 60  |
| ATOM 13272 C ILE E 36     | -10.998 | 1.711  | 28.895 | 1.00 | 51.78 | C0  |
| ANISOU13272 C ILE E 36    | 5620    | 7800   | 6260   | -640 | -70   | 50  |
| ATOM 13273 O ILE E 36     | -10.512 | 2.596  | 29.624 | 1.00 | 52.31 | O0  |
| ANISOU13273 O ILE E 36    | 5740    | 7880   | 6260   | -760 | -170  | 0   |
| ATOM 13274 CB ILE E 36    | -11.483 | 2.429  | 26.500 | 1.00 | 50.02 | C0  |
| ANISOU13274 CB ILE E 36   | 5510    | 7390   | 6100   | -640 | 170   | 20  |
| ATOM 13275 CG1 ILE E 36   | -11.191 | 2.138  | 25.025 | 1.00 | 49.55 | C0  |
| ANISOU13275 CG1 ILE E 36  | 5390    | 7290   | 6150   | -650 | 310   | 40  |
| ATOM 13276 CG2 ILE E 36   | -11.444 | 3.919  | 26.803 | 1.00 | 51.00 | C0  |
| ANISOU13276 CG2 ILE E 36  | 5820    | 7420   | 6130   | -770 | 130   | -60 |
| ATOM 13277 CD1 ILE E 36   | -9.740  | 2.313  | 24.632 | 1.00 | 51.12 | C0  |
| ANISOU13277 CD1 ILE E 36  | 5430    | 7540   | 6460   | -790 | 320   | 40  |
| ATOM 13278 H ILE E 36     | -11.228 | -0.144 | 26.800 | 1.00 | 50.81 | H0  |
| ANISOU13278 H ILE E 36    | 5310    | 7650   | 6340   | -450 | 150   | 150 |
| ATOM 13279 HA ILE E 36    | -9.652  | 2.060  | 27.379 | 1.00 | 52.65 | H0  |
| ANISOU13279 HA ILE E 36   | 5570    | 7890   | 6540   | -780 | 30    | 40  |
| ATOM 13280 HB ILE E 36    | -12.401 | 2.112  | 26.685 | 1.00 | 49.19 | H0  |
| ANISOU13280 HB ILE E 36   | 5480    | 7270   | 5940   | -540 | 180   | 20  |
| ATOM 13281 HG12 ILE E 36  | -11.461 | 1.216  | 24.827 | 1.00 | 48.85 | H0  |
| ANISOU13281 HG12 ILE E 36 | 5230    | 7230   | 6100   | -540 | 330   | 80  |
| ATOM 13282 HG13 ILE E 36  | -11.739 | 2.736  | 24.475 | 1.00 | 49.23 | H0  |
| ANISOU13282 HG13 ILE E 36 | 5490    | 7150   | 6060   | -650 | 360   | 10  |

|                           |         |        |        |      |       |      |    |
|---------------------------|---------|--------|--------|------|-------|------|----|
| ATOM 13283 HG21 ILE E 36  | -11.880 | 4.091  | 27.656 | 1.00 | 51.09 |      | H0 |
| ANISOU13283 HG21 ILE E 36 | 5910    | 7440   | 6060   | -750 | 70    | -80  | H0 |
| ATOM 13284 HG22 ILE E 36  | -11.908 | 4.407  | 26.101 | 1.00 | 50.62 |      | H0 |
| ANISOU13284 HG22 ILE E 36 | 5890    | 7280   | 6060   | -760 | 210   | -80  | H0 |
| ATOM 13285 HG23 ILE E 36  | -10.520 | 4.219  | 26.847 | 1.00 | 52.11 |      | H0 |
| ANISOU13285 HG23 ILE E 36 | 5890    | 7590   | 6320   | -900 | 110   | -70  | H0 |
| ATOM 13286 HD11 ILE E 36  | -9.445  | 3.210  | 24.866 | 1.00 | 51.96 |      | H0 |
| ANISOU13286 HD11 ILE E 36 | 5600    | 7620   | 6520   | -910 | 290   | 0    | H0 |
| ATOM 13287 HD12 ILE E 36  | -9.646  | 2.184  | 23.673 | 1.00 | 50.86 |      | H0 |
| ANISOU13287 HD12 ILE E 36 | 5380    | 7480   | 6470   | -790 | 420   | 50   | H0 |
| ATOM 13288 HD13 ILE E 36  | -9.191  | 1.661  | 25.098 | 1.00 | 51.53 |      | H0 |
| ANISOU13288 HD13 ILE E 36 | 5320    | 7690   | 6570   | -780 | 270   | 70   | H0 |
| ATOM 13289 N ASNE 37      | -11.914 | 0.827  | 29.309 | 1.00 | 50.68 |      | N0 |
| ANISOU13289 N ASNE 37     | 5500    | 7690   | 6070   | -490 | -70   | 90   | N0 |
| ATOM 13290 CA ASNE 37     | -12.492 | 0.891  | 30.675 | 1.00 | 51.22 |      | C0 |
| ANISOU13290 CA ASNE 37    | 5670    | 7790   | 5990   | -470 | -160  | 80   | C0 |
| ATOM 13291 C ASNE 37      | -13.138 | -0.439 | 31.077 | 1.00 | 50.89 |      | C0 |
| ANISOU13291 C ASNE 37     | 5590    | 7810   | 5940   | -330 | -160  | 160  | C0 |
| ATOM 13292 O ASNE 37      | -13.667 | -1.138 | 30.207 | 1.00 | 50.00 |      | O0 |
| ANISOU13292 O ASNE 37     | 5450    | 7660   | 5890   | -240 | -60   | 190  | O0 |
| ATOM 13293 CB ASNE 37     | -13.490 | 2.043  | 30.785 | 1.00 | 50.62 |      | C0 |
| ANISOU13293 CB ASNE 37    | 5820    | 7620   | 5790   | -470 | -120  | -10  | C0 |
| ATOM 13294 CG ASNE 37     | -13.340 | 2.816  | 32.075 | 1.00 | 52.10 |      | C0 |
| ANISOU13294 CG ASNE 37    | 6120    | 7830   | 5840   | -550 | -230  | -70  | C0 |
| ATOM 13295 OD1 ASNE 37    | -13.091 | 2.235  | 33.132 | 1.00 | 53.03 |      | O0 |
| ANISOU13295 OD1 ASNE 37   | 6190    | 8050   | 5900   | -550 | -340  | -30  | O0 |
| ATOM 13296 ND2 ASNE 37    | -13.471 | 4.130  | 31.994 | 1.00 | 52.72 |      | N0 |
| ANISOU13296 ND2 ASNE 37   | 6370    | 7800   | 5850   | -630 | -220  | -160 | N0 |
| ATOM 13297 H ASNE 37      | -12.238 | 0.155  | 28.788 | 1.00 | 49.93 |      | H0 |
| ANISOU13297 H ASNE 37     | 5370    | 7580   | 6020   | -410 | 0     | 130  | H0 |
| ATOM 13298 HA ASNE 37     | -11.755 | 1.076  | 31.303 | 1.00 | 52.33 |      | H0 |
| ANISOU13298 HA ASNE 37    | 5770    | 7990   | 6130   | -540 | -260  | 80   | H0 |
| ATOM 13299 HB2 ASNE 37    | -13.359 | 2.652  | 30.030 | 1.00 | 50.68 |      | H0 |
| ANISOU13299 HB2 ASNE 37   | 5870    | 7560   | 5830   | -510 | -70   | -40  | H0 |
| ATOM 13300 HB3 ASNE 37    | -14.399 | 1.684  | 30.731 | 1.00 | 49.86 |      | H0 |
| ANISOU13300 HB3 ASNE 37   | 5770    | 7520   | 5660   | -370 | -70   | 0    | H0 |
| ATOM 13301 HD21 ASNE 37   | -13.051 | 4.652  | 32.570 | 1.00 | 53.78 |      | H0 |
| ANISOU13301 HD21 ASNE 37  | 6550    | 7940   | 5930   | -720 | -290  | -200 | H0 |
| ATOM 13302 HD22 ASNE 37   | -13.977 | 4.485  | 31.363 | 1.00 | 52.15 |      | H0 |
| ANISOU13302 HD22 ASNE 37  | 6380    | 7650   | 5790   | -590 | -140  | -190 | H0 |
| ATOM 13303 N ILE E 38     | -13.059 | -0.756 | 32.371 | 1.00 | 52.58 |      | N0 |
| ANISOU13303 N ILE E 38    | 5820    | 8100   | 6060   | -330 | -280  | 190  | N0 |
| ATOM 13304 CA ILE E 38    | -13.881 | -1.784 | 33.074 | 1.00 | 52.53 |      | C0 |
| ANISOU13304 CA ILE E 38   | 5850    | 8140   | 5970   | -230 | -280  | 250  | C0 |
| ATOM 13305 C ILE E 38     | -14.770 | -1.027 | 34.066 | 1.00 | 53.22 |      | C0 |
| ANISOU13305 C ILE E 38    | 6120    | 8230   | 5870   | -250 | -290  | 180  | C0 |
| ATOM 13306 O ILE E 38     | -14.209 | -0.329 | 34.928 | 1.00 | 54.61 |      | O0 |
| ANISOU13306 O ILE E 38    | 6340    | 8440   | 5970   | -340 | -400  | 140  | O0 |
| ATOM 13307 CB ILE E 38    | -12.977 | -2.824 | 33.761 | 1.00 | 53.64 |      | C0 |
| ANISOU13307 CB ILE E 38   | 5860    | 8370   | 6150   | -210 | -410  | 350  | C0 |
| ATOM 13308 CG1 ILE E 38   | -12.140 | -3.597 | 32.737 | 1.00 | 53.50 |      | C0 |
| ANISOU13308 CG1 ILE E 38  | 5660    | 8340   | 6330   | -170 | -370  | 410  | C0 |
| ATOM 13309 CG2 ILE E 38   | -13.794 | -3.757 | 34.644 | 1.00 | 53.55 |      | C0 |
| ANISOU13309 CG2 ILE E 38  | 5930    | 8390   | 6030   | -140 | -420  | 420  | C0 |

|             |               |         |        |        |      |       |      |    |
|-------------|---------------|---------|--------|--------|------|-------|------|----|
| ATOM 13310  | CD1 ILE E 38  | -10.909 | -4.256 | 33.317 | 1.00 | 55.35 | C0   |    |
| ANISOU13310 | CD1 ILE E 38  | 5740    | 8670   | 6630   | -160 | -520  | 490  | C0 |
| ATOM 13311  | H ILE E 38    | -12.468 | -0.344 | 32.928 | 1.00 | 53.49 | H0   |    |
| ANISOU13311 | H ILE E 38    | 5920    | 8250   | 6140   | -410 | -370  | 170  | H0 |
| ATOM 13312  | HA ILE E 38   | -14.445 | -2.238 | 32.423 | 1.00 | 51.55 | H0   |    |
| ANISOU13312 | HA ILE E 38   | 5720    | 7980   | 5890   | -170 | -190  | 270  | H0 |
| ATOM 13313  | HB ILE E 38   | -12.349 | -2.332 | 34.346 | 1.00 | 54.73 | H0   |    |
| ANISOU13313 | HB ILE E 38   | 5990    | 8550   | 6250   | -290 | -510  | 330  | H0 |
| ATOM 13314  | HG12 ILE E 38 | -12.703 | -4.289 | 32.330 | 1.00 | 52.70 | H0   |    |
| ANISOU13314 | HG12 ILE E 38 | 5570    | 8200   | 6250   | -90  | -290  | 440  | H0 |
| ATOM 13315  | HG13 ILE E 38 | -11.861 | -2.982 | 32.027 | 1.00 | 53.36 | H0   |    |
| ANISOU13315 | HG13 ILE E 38 | 5610    | 8290   | 6370   | -220 | -320  | 360  | H0 |
| ATOM 13316  | HG21 ILE E 38 | -14.023 | -3.305 | 35.474 | 1.00 | 54.14 | H0   |    |
| ANISOU13316 | HG21 ILE E 38 | 6100    | 8490   | 5980   | -180 | -470  | 390  | H0 |
| ATOM 13317  | HG22 ILE E 38 | -13.275 | -4.555 | 34.845 | 1.00 | 54.12 | H0   |    |
| ANISOU13317 | HG22 ILE E 38 | 5930    | 8490   | 6140   | -110 | -480  | 500  | H0 |
| ATOM 13318  | HG23 ILE E 38 | -14.610 | -4.013 | 34.180 | 1.00 | 52.54 | H0   |    |
| ANISOU13318 | HG23 ILE E 38 | 5840    | 8220   | 5900   | -90  | -310  | 420  | H0 |
| ATOM 13319  | HD11 ILE E 38 | -10.438 | -3.623 | 33.887 | 1.00 | 56.25 | H0   |    |
| ANISOU13319 | HD11 ILE E 38 | 5850    | 8830   | 6690   | -240 | -610  | 450  | H0 |
| ATOM 13320  | HD12 ILE E 38 | -10.321 | -4.539 | 32.596 | 1.00 | 55.32 | H0   |    |
| ANISOU13320 | HD12 ILE E 38 | 5610    | 8660   | 6750   | -130 | -490  | 500  | H0 |
| ATOM 13321  | HD13 ILE E 38 | -11.171 | -5.031 | 33.844 | 1.00 | 55.42 | H0   |    |
| ANISOU13321 | HD13 ILE E 38 | 5770    | 8690   | 6590   | -90  | -550  | 550  | H0 |
| ATOM 13322  | N LEU E 39    | -16.095 | -1.140 | 33.919 | 1.00 | 53.81 | N0   |    |
| ANISOU13322 | N LEU E 39    | 6280    | 8280   | 5880   | -170 | -180  | 160  | N0 |
| ATOM 13323  | CA LEU E 39   | -17.106 | -0.282 | 34.601 | 1.00 | 55.24 | C0   |    |
| ANISOU13323 | CA LEU E 39   | 6630    | 8450   | 5900   | -160 | -150  | 70   | C0 |
| ATOM 13324  | C LEU E 39    | -17.721 | -1.022 | 35.792 | 1.00 | 56.12 | C0   |    |
| ANISOU13324 | C LEU E 39    | 6790    | 8660   | 5870   | -130 | -160  | 110  | C0 |
| ATOM 13325  | O LEU E 39    | -17.853 | -0.404 | 36.861 | 1.00 | 59.23 | O0   |    |
| ANISOU13325 | O LEU E 39    | 7310    | 9080   | 6110   | -170 | -210  | 50   | O0 |
| ATOM 13326  | CB LEU E 39   | -18.196 | 0.104  | 33.597 | 1.00 | 53.90 | C0   |    |
| ANISOU13326 | CB LEU E 39   | 6500    | 8220   | 5760   | -80  | -10   | 20   | C0 |
| ATOM 13327  | CG LEU E 39   | -17.726 | 0.904  | 32.385 | 1.00 | 53.84 | C0   |    |
| ANISOU13327 | CG LEU E 39   | 6490    | 8110   | 5860   | -110 | 20    | -20  | C0 |
| ATOM 13328  | CD1 LEU E 39  | -18.905 | 1.262  | 31.495 | 1.00 | 53.04 | C0   |    |
| ANISOU13328 | CD1 LEU E 39  | 6450    | 7950   | 5760   | -10  | 140   | -70  | C0 |
| ATOM 13329  | CD2 LEU E 39  | -16.979 | 2.158  | 32.812 | 1.00 | 55.31 | C0   |    |
| ANISOU13329 | CD2 LEU E 39  | 6780    | 8240   | 6000   | -210 | -50   | -100 | C0 |
| ATOM 13330  | H LEU E 39    | -16.468 | -1.768 | 33.374 | 1.00 | 52.90 | H0   |    |
| ANISOU13330 | H LEU E 39    | 6120    | 8150   | 5820   | -110 | -120  | 200  | H0 |
| ATOM 13331  | HA LEU E 39   | -16.658 | 0.530  | 34.932 | 1.00 | 55.84 | H0   |    |
| ANISOU13331 | HA LEU E 39   | 6770    | 8510   | 5940   | -230 | -200  | 10   | H0 |
| ATOM 13332  | HB2 LEU E 39  | -18.625 | -0.716 | 33.280 | 1.00 | 53.33 | H0   |    |
| ANISOU13332 | HB2 LEU E 39  | 6370    | 8170   | 5720   | -30  | 40    | 70   | H0 |
| ATOM 13333  | HB3 LEU E 39  | -18.875 | 0.627  | 34.068 | 1.00 | 54.35 | H0   |    |
| ANISOU13333 | HB3 LEU E 39  | 6660    | 8280   | 5710   | -50  | 20    | -40  | H0 |
| ATOM 13334  | HG LEU E 39   | -17.106 | 0.338  | 31.863 | 1.00 | 53.53 | H0   |    |
| ANISOU13334 | HG LEU E 39   | 6340    | 8070   | 5920   | -120 | 20    | 30   | H0 |
| ATOM 13335  | HD11 LEU E 39 | -19.381 | 0.452  | 31.253 | 1.00 | 52.36 | H0   |    |
| ANISOU13335 | HD11 LEU E 39 | 6300    | 7900   | 5700   | 40   | 180   | -20  | H0 |
| ATOM 13336  | HD12 LEU E 39 | -18.582 | 1.701  | 30.689 | 1.00 | 52.80 | H0   |    |
| ANISOU13336 | HD12 LEU E 39 | 6420    | 7840   | 5790   | -30  | 160   | -80  | H0 |

|                           |         |        |        |      |       |      |    |
|---------------------------|---------|--------|--------|------|-------|------|----|
| ATOM 13337 HD13 LEU E 39  | -19.504 | 1.861  | 31.973 | 1.00 | 53.44 |      | H0 |
| ANISOU13337 HD13 LEU E 39 | 6600    | 7990   | 5720   | 20   | 150   | -130 | H0 |
| ATOM 13338 HD21 LEU E 39  | -17.469 | 2.602  | 33.526 | 1.00 | 55.77 |      | H0 |
| ANISOU13338 HD21 LEU E 39 | 6940    | 8310   | 5940   | -200 | -60   | -150 | H0 |
| ATOM 13339 HD22 LEU E 39  | -16.898 | 2.761  | 32.053 | 1.00 | 55.04 |      | H0 |
| ANISOU13339 HD22 LEU E 39 | 6770    | 8130   | 6010   | -220 | -10   | -130 | H0 |
| ATOM 13340 HD23 LEU E 39  | -16.092 | 1.917  | 33.129 | 1.00 | 55.81 |      | H0 |
| ANISOU13340 HD23 LEU E 39 | 6770    | 8350   | 6090   | -280 | -130  | -70  | H0 |
| ATOM 13341 N GLUE 40      | -18.121 | -2.277 | 35.594 | 1.00 | 55.97 |      | N0 |
| ANISOU13341 N GLUE 40     | 6700    | 8670   | 5900   | -80  | -120  | 200  | N0 |
| ATOM 13342 CA GLUE 40     | -18.698 | -3.141 | 36.656 | 1.00 | 56.95 |      | C0 |
| ANISOU13342 CA GLUE 40    | 6880    | 8870   | 5890   | -70  | -120  | 270  | C0 |
| ATOM 13343 C GLUE 40      | -18.064 | -4.529 | 36.554 | 1.00 | 56.04 |      | C0 |
| ANISOU13343 C GLUE 40     | 6670    | 8760   | 5870   | -50  | -180  | 400  | C0 |
| ATOM 13344 O GLUE 40      | -17.843 | -5.012 | 35.421 | 1.00 | 54.91 |      | O0 |
| ANISOU13344 O GLUE 40     | 6420    | 8560   | 5880   | -10  | -130  | 440  | O0 |
| ATOM 13345 CB GLUE 40     | -20.225 | -3.215 | 36.562 | 1.00 | 57.52 |      | C0 |
| ANISOU13345 CB GLUE 40    | 7000    | 8960   | 5890   | -10  | 30    | 230  | C0 |
| ATOM 13346 CG GLUE 40     | -20.859 | -3.892 | 37.770 | 1.00 | 59.56 |      | C0 |
| ANISOU13346 CG GLUE 40    | 7340    | 9310   | 5980   | -30  | 40    | 270  | C0 |
| ATOM 13347 CD GLUE 40     | -22.371 | -3.781 | 37.894 | 1.00 | 60.50 |      | C0 |
| ANISOU13347 CD GLUE 40    | 7500    | 9490   | 6000   | 10   | 190   | 210  | C0 |
| ATOM 13348 OE1 GLUE 40    | -23.055 | -3.695 | 36.851 | 1.00 | 59.85 |      | O0 |
| ANISOU13348 OE1 GLUE 40   | 7340    | 9380   | 6020   | 60   | 290   | 170  | O0 |
| ATOM 13349 OE2 GLUE 40    | -22.865 | -3.784 | 39.043 | 1.00 | 62.08 |      | O0 |
| ANISOU13349 OE2 GLUE 40   | 7800    | 9770   | 6030   | -20  | 210   | 200  | O0 |
| ATOM 13350 H GLUE 40      | -18.064 | -2.686 | 34.783 | 1.00 | 55.17 |      | H0 |
| ANISOU13350 H GLUE 40     | 6530    | 8530   | 5900   | -50  | -80   | 240  | H0 |
| ATOM 13351 HA GLUE 40     | -18.458 | -2.753 | 37.529 | 1.00 | 57.91 |      | H0 |
| ANISOU13351 HA GLUE 40    | 7070    | 9030   | 5910   | -110 | -190  | 240  | H0 |
| ATOM 13352 HB2 GLUE 40    | -20.581 | -2.305 | 36.480 | 1.00 | 57.50 |      | H0 |
| ANISOU13352 HB2 GLUE 40   | 7050    | 8940   | 5850   | 0    | 60    | 140  | H0 |
| ATOM 13353 HB3 GLUE 40    | -20.468 | -3.710 | 35.752 | 1.00 | 56.62 |      | H0 |
| ANISOU13353 HB3 GLUE 40   | 6820    | 8820   | 5870   | 20   | 90    | 260  | H0 |
| ATOM 13354 HG2 GLUE 40    | -20.628 | -4.844 | 37.750 | 1.00 | 59.53 |      | H0 |
| ANISOU13354 HG2 GLUE 40   | 7290    | 9310   | 6020   | -30  | 20    | 360  | H0 |
| ATOM 13355 HG3 GLUE 40    | -20.461 | -3.514 | 38.583 | 1.00 | 60.51 |      | H0 |
| ANISOU13355 HG3 GLUE 40   | 7530    | 9460   | 6010   | -70  | -30   | 260  | H0 |
| ATOM 13356 N VAL E 41     | -17.759 | -5.109 | 37.714 | 1.00 | 55.81 |      | N0 |
| ANISOU13356 N VAL E 41    | 6690    | 8790   | 5730   | -70  | -270  | 480  | N0 |
| ATOM 13357 CA VAL E 41    | -17.221 | -6.485 | 37.898 | 1.00 | 55.37 |      | C0 |
| ANISOU13357 CA VAL E 41   | 6580    | 8730   | 5720   | -40  | -340  | 620  | C0 |
| ATOM 13358 C VAL E 41     | -18.007 | -7.119 | 39.047 | 1.00 | 55.19 |      | C0 |
| ANISOU13358 C VAL E 41    | 6700    | 8760   | 5510   | -60  | -330  | 680  | C0 |
| ATOM 13359 O VAL E 41     | -18.272 | -6.409 | 40.034 | 1.00 | 55.80 |      | O0 |
| ANISOU13359 O VAL E 41    | 6890    | 8900   | 5410   | -110 | -360  | 620  | O0 |
| ATOM 13360 CB VAL E 41    | -15.704 | -6.445 | 38.173 | 1.00 | 56.96 |      | C0 |
| ANISOU13360 CB VAL E 41   | 6700    | 8960   | 5990   | -50  | -520  | 670  | C0 |
| ATOM 13361 CG1 VAL E 41   | -15.295 | -7.242 | 39.403 | 1.00 | 58.52 |      | C0 |
| ANISOU13361 CG1 VAL E 41  | 6960    | 9210   | 6070   | -50  | -670  | 780  | C0 |
| ATOM 13362 CG2 VAL E 41   | -14.903 | -6.877 | 36.955 | 1.00 | 56.82 |      | C0 |
| ANISOU13362 CG2 VAL E 41  | 6510    | 8880   | 6200   | 0    | -510  | 700  | C0 |
| ATOM 13363 H VAL E 41     | -17.863 | -4.671 | 38.506 | 1.00 | 56.71 |      | H0 |
| ANISOU13363 H VAL E 41    | 6880    | 8940   | 5720   | -110 | -310  | 450  | H0 |

|                           |         |         |        |      |           |    |
|---------------------------|---------|---------|--------|------|-----------|----|
| ATOM 13364 HA VAL E 41    | -17.385 | -6.997  | 37.086 | 1.00 | 54.58     | H0 |
| ANISOU13364 HA VAL E 41   | 6420    | 8580    | 5730   | 0    | -270 650  | H0 |
| ATOM 13365 HB VAL E 41    | -15.474 | -5.501  | 38.350 | 1.00 | 57.19     | H0 |
| ANISOU13365 HB VAL E 41   | 6740    | 9010    | 5980   | -110 | -560 590  | H0 |
| ATOM 13366 HG11 VAL E 41  | -15.587 | -6.776  | 40.206 | 1.00 | 59.20     | H0 |
| ANISOU13366 HG11 VAL E 41 | 7140    | 9340    | 6010   | -100 | -690 750  | H0 |
| ATOM 13367 HG12 VAL E 41  | -14.327 | -7.335  | 39.420 | 1.00 | 59.29     | H0 |
| ANISOU13367 HG12 VAL E 41 | 6960    | 9320    | 6240   | -40  | -780 820  | H0 |
| ATOM 13368 HG13 VAL E 41  | -15.702 | -8.123  | 39.372 | 1.00 | 58.40     | H0 |
| ANISOU13368 HG13 VAL E 41 | 6970    | 9160    | 6050   | -10  | -620 850  | H0 |
| ATOM 13369 HG21 VAL E 41  | -14.779 | -7.842  | 36.972 | 1.00 | 56.93     | H0 |
| ANISOU13369 HG21 VAL E 41 | 6500    | 8880    | 6250   | 50   | -530 790  | H0 |
| ATOM 13370 HG22 VAL E 41  | -14.036 | -6.439  | 36.969 | 1.00 | 57.26     | H0 |
| ANISOU13370 HG22 VAL E 41 | 6490    | 8960    | 6300   | -20  | -600 680  | H0 |
| ATOM 13371 HG23 VAL E 41  | -15.378 | -6.624  | 36.145 | 1.00 | 55.52     | H0 |
| ANISOU13371 HG23 VAL E 41 | 6330    | 8670    | 6090   | 10   | -400 650  | H0 |
| ATOM 13372 N ASNE 42      | -18.372 | -8.393  | 38.904 | 1.00 | 54.06     | N0 |
| ANISOU13372 N ASNE 42     | 6560    | 8580    | 5390   | -30  | -280 790  | N0 |
| ATOM 13373 CA ASNE 42     | -19.129 | -9.155  | 39.929 | 1.00 | 54.64     | C0 |
| ANISOU13373 CA ASNE 42    | 6780    | 8700    | 5290   | -70  | -260 860  | C0 |
| ATOM 13374 C ASNE 42      | -18.519 | -10.554 | 40.046 | 1.00 | 55.50     | C0 |
| ANISOU13374 C ASNE 42     | 6900    | 8740    | 5450   | -30  | -340 1020 | C0 |
| ATOM 13375 O ASNE 42      | -18.705 | -11.365 | 39.114 | 1.00 | 54.44     | O0 |
| ANISOU13375 O ASNE 42     | 6710    | 8520    | 5450   | 10   | -260 1060 | O0 |
| ATOM 13376 CB ASNE 42     | -20.625 | -9.181  | 39.615 | 1.00 | 53.30     | C0 |
| ANISOU13376 CB ASNE 42    | 6640    | 8550    | 5070   | -100 | -60 800   | C0 |
| ATOM 13377 CG ASNE 42     | -21.452 | -9.715  | 40.765 | 1.00 | 54.11     | C0 |
| ANISOU13377 CG ASNE 42    | 6890    | 8710    | 4960   | -160 | -10 850   | C0 |
| ATOM 13378 OD1 ASNE 42    | -20.996 | -10.569 | 41.519 | 1.00 | 55.19     | O0 |
| ANISOU13378 OD1 ASNE 42   | 7110    | 8830    | 5020   | -180 | -100 980  | O0 |
| ATOM 13379 ND2 ASNE 42    | -22.671 | -9.223  | 40.906 | 1.00 | 53.83     | N0 |
| ANISOU13379 ND2 ASNE 42   | 6880    | 8750    | 4820   | -200 | 140 760   | N0 |
| ATOM 13380 H ASNE 42      | -18.177 | -8.877  | 38.157 | 1.00 | 53.61     | H0 |
| ANISOU13380 H ASNE 42     | 6430    | 8470    | 5460   | 10   | -260 820  | H0 |
| ATOM 13381 HA ASNE 42     | -19.020 | -8.697  | 40.794 | 1.00 | 55.60     | H0 |
| ANISOU13381 HA ASNE 42    | 6970    | 8870    | 5280   | -110 | -320 840  | H0 |
| ATOM 13382 HB2 ASNE 42    | -20.919 | -8.271  | 39.404 | 1.00 | 52.78     | H0 |
| ANISOU13382 HB2 ASNE 42   | 6550    | 8510    | 5000   | -90  | -20 700   | H0 |
| ATOM 13383 HB3 ASNE 42    | -20.774 | -9.737  | 38.824 | 1.00 | 52.55     | H0 |
| ANISOU13383 HB3 ASNE 42   | 6490    | 8400    | 5080   | -70  | -10 830   | H0 |
| ATOM 13384 HD21 ASNE 42   | -23.106 | -9.330  | 41.668 | 1.00 | 54.81     | H0 |
| ANISOU13384 HD21 ASNE 42  | 7090    | 8930    | 4810   | -240 | 170 770   | H0 |
| ATOM 13385 HD22 ASNE 42   | -23.053 | -8.788  | 40.238 | 1.00 | 52.96     | H0 |
| ANISOU13385 HD22 ASNE 42  | 6700    | 8640    | 4780   | -170 | 210 690   | H0 |
| ATOM 13386 N GLUE 43      | -17.820 | -10.810 | 41.156 | 1.00 | 57.09     | N0 |
| ANISOU13386 N GLUE 43     | 7180    | 8980    | 5530   | -40  | -500 1110 | N0 |
| ATOM 13387 CA GLUE 43     | -17.066 | -12.066 | 41.405 | 1.00 | 58.87     | C0 |
| ANISOU13387 CA GLUE 43    | 7430    | 9140    | 5800   | 30   | -620 1270 | C0 |
| ATOM 13388 C GLUE 43      | -18.050 | -13.206 | 41.699 | 1.00 | 59.32     | C0 |
| ANISOU13388 C GLUE 43     | 7640    | 9140    | 5760   | -10  | -510 1370 | C0 |
| ATOM 13389 O GLUE 43      | -17.729 | -14.362 | 41.351 | 1.00 | 59.96     | O0 |
| ANISOU13389 O GLUE 43     | 7730    | 9120    | 5930   | 60   | -540 1490 | O0 |
| ATOM 13390 CB GLUE 43     | -16.067 | -11.865 | 42.547 | 1.00 | 61.04     | C0 |
| ANISOU13390 CB GLUE 43    | 7740    | 9490    | 5960   | 30   | -840 1330 | C0 |

|             |      |          |         |         |        |      |       |      |    |
|-------------|------|----------|---------|---------|--------|------|-------|------|----|
| ATOM 13391  | CG   | GLU E 43 | -14.954 | -12.899 | 42.565 | 1.00 | 62.56 | C0   |    |
| ANISOU13391 | CG   | GLU E 43 | 7890    | 9620    | 6260   | 140  | -1010 | 1480 | C0 |
| ATOM 13392  | CD   | GLU E 43 | -13.810 | -12.588 | 43.517 | 1.00 | 64.66 | C0   |    |
| ANISOU13392 | CD   | GLU E 43 | 8130    | 9980    | 6450   | 160  | -1250 | 1530 | C0 |
| ATOM 13393  | OE1  | GLU E 43 | -12.768 | -13.263 | 43.420 | 1.00 | 65.62 | O0   |    |
| ANISOU13393 | OE1  | GLU E 43 | 8160    | 10080   | 6690   | 270  | -1400 | 1630 | O0 |
| ATOM 13394  | OE2  | GLU E 43 | -13.963 | -11.671 | 44.353 | 1.00 | 65.22 | O0   |    |
| ANISOU13394 | OE2  | GLU E 43 | 8280    | 10150   | 6350   | 60   | -1300 | 1450 | O0 |
| ATOM 13395  | H    | GLU E 43 | -17.770 | -10.216 | 41.846 | 1.00 | 57.90 | H0   |    |
| ANISOU13395 | H    | GLU E 43 | 7330    | 9150    | 5520   | -80  | -550  | 1070 | H0 |
| ATOM 13396  | HA   | GLU E 43 | -16.567 | -12.290 | 40.587 | 1.00 | 58.22 | H0   |    |
| ANISOU13396 | HA   | GLU E 43 | 7230    | 9000    | 5880   | 90   | -620  | 1280 | H0 |
| ATOM 13397  | HB2  | GLU E 43 | -15.671 | -10.972 | 42.462 | 1.00 | 60.78 | H0   |    |
| ANISOU13397 | HB2  | GLU E 43 | 7630    | 9500    | 5950   | 10   | -880  | 1250 | H0 |
| ATOM 13398  | HB3  | GLU E 43 | -16.551 | -11.901 | 43.398 | 1.00 | 61.87 | H0   |    |
| ANISOU13398 | HB3  | GLU E 43 | 7990    | 9630    | 5890   | -30  | -840  | 1350 | H0 |
| ATOM 13399  | HG2  | GLU E 43 | -15.334 | -13.769 | 42.814 | 1.00 | 63.11 | H0   |    |
| ANISOU13399 | HG2  | GLU E 43 | 8070    | 9630    | 6270   | 160  | -980  | 1570 | H0 |
| ATOM 13400  | HG3  | GLU E 43 | -14.586 | -12.986 | 41.660 | 1.00 | 61.71 | H0   |    |
| ANISOU13400 | HG3  | GLU E 43 | 7650    | 9470    | 6330   | 210  | -980  | 1460 | H0 |
| ATOM 13401  | N    | ILE E 44 | -19.202 | -12.893 | 42.303 | 1.00 | 59.33 | N0   |    |
| ANISOU13401 | N    | ILE E 44 | 7750    | 9220    | 5570   | -110 | -390  | 1320 | N0 |
| ATOM 13402  | CA   | ILE E 44 | -20.266 | -13.885 | 42.644 | 1.00 | 60.18 | C0   |    |
| ANISOU13402 | CA   | ILE E 44 | 8010    | 9300    | 5560   | -180 | -270  | 1400 | C0 |
| ATOM 13403  | C    | ILE E 44 | -20.882 | -14.425 | 41.344 | 1.00 | 57.96 | C0   |    |
| ANISOU13403 | C    | ILE E 44 | 7640    | 8930    | 5450   | -170 | -110  | 1380 | C0 |
| ATOM 13404  | O    | ILE E 44 | -21.020 | -15.656 | 41.234 | 1.00 | 58.96 | O0   |    |
| ANISOU13404 | O    | ILE E 44 | 7850    | 8950    | 5600   | -180 | -90   | 1490 | O0 |
| ATOM 13405  | CB   | ILE E 44 | -21.322 | -13.269 | 43.587 | 1.00 | 61.32 | C0   |    |
| ANISOU13405 | CB   | ILE E 44 | 8260    | 9570    | 5470   | -300 | -160  | 1330 | C0 |
| ATOM 13406  | CG1  | ILE E 44 | -20.717 | -12.922 | 44.952 | 1.00 | 63.53 | C0   |    |
| ANISOU13406 | CG1  | ILE E 44 | 8680    | 9920    | 5540   | -320 | -320  | 1370 | C0 |
| ATOM 13407  | CG2  | ILE E 44 | -22.535 | -14.183 | 43.726 | 1.00 | 61.74 | C0   |    |
| ANISOU13407 | CG2  | ILE E 44 | 8420    | 9610    | 5430   | -400 | 10    | 1380 | C0 |
| ATOM 13408  | CD1  | ILE E 44 | -21.526 | -11.921 | 45.747 | 1.00 | 64.28 | C0   |    |
| ANISOU13408 | CD1  | ILE E 44 | 8840    | 10150   | 5430   | -400 | -220  | 1250 | C0 |
| ATOM 13409  | H    | ILE E 44 | -19.409 | -12.042 | 42.551 | 1.00 | 59.21 | H0   |    |
| ANISOU13409 | H    | ILE E 44 | 7740    | 9270    | 5490   | -140 | -380  | 1230 | H0 |
| ATOM 13410  | HA   | ILE E 44 | -19.844 | -14.628 | 43.111 | 1.00 | 61.32 | H0   |    |
| ANISOU13410 | HA   | ILE E 44 | 8240    | 9390    | 5660   | -170 | -360  | 1520 | H0 |
| ATOM 13411  | HB   | ILE E 44 | -21.630 | -12.425 | 43.177 | 1.00 | 60.21 | H0   |    |
| ANISOU13411 | HB   | ILE E 44 | 8030    | 9470    | 5370   | -290 | -100  | 1210 | H0 |
| ATOM 13412  | HG12 | ILE E 44 | -20.634 | -13.747 | 45.477 | 1.00 | 64.77 | H0   |    |
| ANISOU13412 | HG12 | ILE E 44 | 8950    | 10040   | 5620   | -340 | -360  | 1490 | H0 |
| ATOM 13413  | HG13 | ILE E 44 | -19.816 | -12.561 | 44.816 | 1.00 | 63.40 | H0   |    |
| ANISOU13413 | HG13 | ILE E 44 | 8590    | 9890    | 5610   | -260 | -450  | 1360 | H0 |
| ATOM 13414  | HG21 | ILE E 44 | -23.124 | -14.062 | 42.962 | 1.00 | 60.61 | H0   |    |
| ANISOU13414 | HG21 | ILE E 44 | 8180    | 9470    | 5370   | -400 | 130   | 1310 | H0 |
| ATOM 13415  | HG22 | ILE E 44 | -23.018 | -13.964 | 44.541 | 1.00 | 62.72 | H0   |    |
| ANISOU13415 | HG22 | ILE E 44 | 8640    | 9820    | 5370   | -470 | 50    | 1370 | H0 |
| ATOM 13416  | HG23 | ILE E 44 | -22.242 | -15.110 | 43.765 | 1.00 | 62.46 | H0   |    |
| ANISOU13416 | HG23 | ILE E 44 | 8580    | 9620    | 5530   | -390 | -40   | 1500 | H0 |
| ATOM 13417  | HD11 | ILE E 44 | -21.718 | -11.144 | 45.193 | 1.00 | 63.00 | H0   |    |
| ANISOU13417 | HD11 | ILE E 44 | 8580    | 10010   | 5350   | -380 | -170  | 1130 | H0 |

|                           |                        |                |    |
|---------------------------|------------------------|----------------|----|
| ATOM 13418 HD12 ILE E 44  | -21.019 -11.642 46.530 | 1.00 65.33     | H0 |
| ANISOU13418 HD12 ILE E 44 | 9060 10320 5450        | -410 -340 1260 | H0 |
| ATOM 13419 HD13 ILE E 44  | -22.362 -12.329 46.032 | 1.00 64.67     | H0 |
| ANISOU13419 HD13 ILE E 44 | 8970 10220 5380        | -470 -100 1270 | H0 |
| ATOM 13420 N THR E 45     | -21.221 -13.548 40.395 | 1.00 55.56     | N0 |
| ANISOU13420 N THR E 45    | 7190 8660 5260         | -160 -20 1230  | N0 |
| ATOM 13421 CA THR E 45    | -21.947 -13.907 39.144 | 1.00 53.81     | C0 |
| ANISOU13421 CA THR E 45   | 6880 8380 5180         | -170 120 1190  | C0 |
| ATOM 13422 C THR E 45     | -20.962 -14.210 38.008 | 1.00 52.62     | C0 |
| ANISOU13422 C THR E 45    | 6620 8120 5260         | -60 60 1200    | C0 |
| ATOM 13423 O THR E 45     | -21.400 -14.832 37.025 | 1.00 51.51     | O0 |
| ANISOU13423 O THR E 45    | 6450 7900 5220         | -60 160 1200   | O0 |
| ATOM 13424 CB THR E 45    | -22.934 -12.806 38.740 | 1.00 52.75     | C0 |
| ANISOU13424 CB THR E 45   | 6660 8350 5030         | -200 250 1030  | C0 |
| ATOM 13425 OG1 THR E 45   | -22.192 -11.682 38.266 | 1.00 52.08     | O0 |
| ANISOU13425 OG1 THR E 45  | 6470 8270 5040         | -120 180 940   | O0 |
| ATOM 13426 CG2 THR E 45   | -23.840 -12.389 39.879 | 1.00 53.69     | C0 |
| ANISOU13426 CG2 THR E 45  | 6870 8600 4930         | -280 320 1000  | C0 |
| ATOM 13427 H THR E 45     | -21.034 -12.658 40.447 | 1.00 55.25     | H0 |
| ANISOU13427 H THR E 45    | 7100 8680 5220         | -150 -50 1150  | H0 |
| ATOM 13428 HA THR E 45    | -22.464 -14.726 39.325 | 1.00 54.46     | H0 |
| ANISOU13428 HA THR E 45   | 7050 8430 5210         | -220 180 1250  | H0 |
| ATOM 13429 HB THR E 45    | -23.493 -13.151 38.003 | 1.00 52.11     | H0 |
| ANISOU13429 HB THR E 45   | 6540 8240 5020         | -210 340 1010  | H0 |
| ATOM 13430 HG21 THR E 45  | -24.255 -13.178 40.271 | 1.00 54.57     | H0 |
| ANISOU13430 HG21 THR E 45 | 7070 8710 4960         | -340 360 1070  | H0 |
| ATOM 13431 HG22 THR E 45  | -24.533 -11.793 39.542 | 1.00 53.08     | H0 |
| ANISOU13431 HG22 THR E 45 | 6730 8580 4850         | -280 410 900   | H0 |
| ATOM 13432 HG23 THR E 45  | -23.318 -11.926 40.558 | 1.00 54.32     | H0 |
| ANISOU13432 HG23 THR E 45 | 7000 8710 4930         | -270 230 990   | H0 |
| ATOM 13433 N ASNE 46      | -19.693 -13.799 38.140 | 1.00 52.73     | N0 |
| ANISOU13433 N ASNE 46     | 6570 8130 5340         | 20 -90 1220    | N0 |
| ATOM 13434 CA ASNE 46     | -18.640 -13.950 37.097 | 1.00 52.20     | C0 |
| ANISOU13434 CA ASNE 46    | 6370 7980 5480         | 130 -140 1220  | C0 |
| ATOM 13435 C ASNE 46      | -19.063 -13.171 35.843 | 1.00 50.79     | C0 |
| ANISOU13435 C ASNE 46     | 6070 7800 5420         | 120 -20 1080   | C0 |
| ATOM 13436 O ASNE 46      | -19.083 -13.760 34.744 | 1.00 49.38     | O0 |
| ANISOU13436 O ASNE 46     | 5850 7540 5380         | 150 60 1080    | O0 |
| ATOM 13437 CB ASNE 46     | -18.346 -15.425 36.793 | 1.00 52.50     | C0 |
| ANISOU13437 CB ASNE 46    | 6470 7880 5610         | 190 -140 1340  | C0 |
| ATOM 13438 CG ASNE 46     | -17.296 -16.032 37.699 | 1.00 53.94     | C0 |
| ANISOU13438 CG ASNE 46    | 6700 8030 5760         | 270 -320 1470  | C0 |
| ATOM 13439 OD1 ASN E 46   | -16.426 -15.333 38.211 | 1.00 54.27     | O0 |
| ANISOU13439 OD1 ASN E 46  | 6670 8160 5790         | 300 -460 1460  | O0 |
| ATOM 13440 ND2 ASN E 46   | -17.355 -17.340 37.882 | 1.00 54.99     | N0 |
| ANISOU13440 ND2 ASN E 46  | 6970 8040 5880         | 300 -320 1600  | N0 |
| ATOM 13441 H ASN E 46     | -19.390 -13.390 38.894 | 1.00 53.49     | H0 |
| ANISOU13441 H ASN E 46    | 6700 8280 5340         | 10 -170 1220   | H0 |
| ATOM 13442 HA ASN E 46    | -17.811 -13.545 37.443 | 1.00 52.69     | H0 |
| ANISOU13442 HA ASN E 46   | 6390 8070 5560         | 160 -250 1220  | H0 |
| ATOM 13443 HB2 ASN E 46   | -19.174 -15.936 36.883 | 1.00 52.59     | H0 |
| ANISOU13443 HB2 ASN E 46  | 6570 7860 5550         | 120 -60 1360   | H0 |
| ATOM 13444 HB3 ASN E 46   | -18.044 -15.505 35.866 | 1.00 51.80     | H0 |
| ANISOU13444 HB3 ASN E 46  | 6290 7730 5660         | 240 -110 1310  | H0 |

|             |      |          |         |         |        |      |           |    |
|-------------|------|----------|---------|---------|--------|------|-----------|----|
| ATOM 13445  | HD21 | ASN E 46 | -16.878 | -17.719 | 38.523 | 1.00 | 56.34     | H0 |
| ANISOU13445 | HD21 | ASN E 46 | 7200    | 8200    | 6010   | 340  | -430 1690 | H0 |
| ATOM 13446  | HD22 | ASN E 46 | -17.869 | -17.838 | 37.363 | 1.00 | 54.63     | H0 |
| ANISOU13446 | HD22 | ASN E 46 | 6960    | 7920    | 5870   | 270  | -230 1600 | H0 |
| ATOM 13447  | N    | GLU E 47 | -19.397 | -11.891 | 36.013 | 1.00 | 51.29     | N0 |
| ANISOU13447 | N    | GLU E 47 | 6110    | 7960    | 5420   | 80   | 0 970     | N0 |
| ATOM 13448  | CA   | GLU E 47 | -19.794 | -10.979 | 34.909 | 1.00 | 51.28     | C0 |
| ANISOU13448 | CA   | GLU E 47 | 6020    | 7970    | 5500   | 80   | 100 850   | C0 |
| ATOM 13449  | C    | GLU E 47 | -18.946 | -9.709  | 34.991 | 1.00 | 51.84     | C0 |
| ANISOU13449 | C    | GLU E 47 | 6030    | 8080    | 5590   | 90   | 10 770    | C0 |
| ATOM 13450  | O    | GLU E 47 | -18.667 | -9.240  | 36.119 | 1.00 | 52.54     | O0 |
| ANISOU13450 | O    | GLU E 47 | 6170    | 8230    | 5560   | 60   | -80 780   | O0 |
| ATOM 13451  | CB   | GLU E 47 | -21.293 | -10.678 | 34.964 | 1.00 | 51.15     | C0 |
| ANISOU13451 | CB   | GLU E 47 | 6050    | 8010    | 5370   | 30   | 220 780   | C0 |
| ATOM 13452  | CG   | GLU E 47 | -22.145 | -11.900 | 34.676 | 1.00 | 52.05     | C0 |
| ANISOU13452 | CG   | GLU E 47 | 6200    | 8090    | 5490   | -10  | 320 840   | C0 |
| ATOM 13453  | CD   | GLU E 47 | -23.632 | -11.757 | 34.955 | 1.00 | 52.73     | C0 |
| ANISOU13453 | CD   | GLU E 47 | 6310    | 8270    | 5450   | -90  | 440 790   | C0 |
| ATOM 13454  | OE1  | GLU E 47 | -24.282 | -12.799 | 35.208 | 1.00 | 53.52     | O0 |
| ANISOU13454 | OE1  | GLU E 47 | 6480    | 8370    | 5490   | -160 | 500 850   | O0 |
| ATOM 13455  | OE2  | GLU E 47 | -24.136 | -10.612 | 34.918 | 1.00 | 52.66     | O0 |
| ANISOU13455 | OE2  | GLU E 47 | 6260    | 8350    | 5400   | -70  | 480 680   | O0 |
| ATOM 13456  | H    | GLU E 47 | -19.400 | -11.493 | 36.832 | 1.00 | 52.00     | H0 |
| ANISOU13456 | H    | GLU E 47 | 6250    | 8110    | 5400   | 50   | -50 970   | H0 |
| ATOM 13457  | HA   | GLU E 47 | -19.598 | -11.428 | 34.058 | 1.00 | 50.66     | H0 |
| ANISOU13457 | HA   | GLU E 47 | 5890    | 7820    | 5540   | 110  | 130 860   | H0 |
| ATOM 13458  | HB2  | GLU E 47 | -21.514 | -10.334 | 35.855 | 1.00 | 51.92     | H0 |
| ANISOU13458 | HB2  | GLU E 47 | 6200    | 8180    | 5350   | 0    | 200 770   | H0 |
| ATOM 13459  | HB3  | GLU E 47 | -21.499 | -9.980  | 34.308 | 1.00 | 50.43     | H0 |
| ANISOU13459 | HB3  | GLU E 47 | 5900    | 7930    | 5330   | 40   | 270 700   | H0 |
| ATOM 13460  | HG2  | GLU E 47 | -22.032 | -12.145 | 33.735 | 1.00 | 51.28     | H0 |
| ANISOU13460 | HG2  | GLU E 47 | 6050    | 7930    | 5500   | 10   | 350 830   | H0 |
| ATOM 13461  | HG3  | GLU E 47 | -21.808 | -12.649 | 35.211 | 1.00 | 52.85     | H0 |
| ANISOU13461 | HG3  | GLU E 47 | 6360    | 8160    | 5560   | -20  | 270 930   | H0 |
| ATOM 13462  | N    | VAL E 48 | -18.532 | -9.206  | 33.829 | 1.00 | 51.37     | N0 |
| ANISOU13462 | N    | VAL E 48 | 5870    | 7980    | 5680   | 120  | 40 710    | N0 |
| ATOM 13463  | CA   | VAL E 48 | -17.745 | -7.951  | 33.674 | 1.00 | 52.55     | C0 |
| ANISOU13463 | CA   | VAL E 48 | 5960    | 8140    | 5860   | 110  | -20 630   | C0 |
| ATOM 13464  | C    | VAL E 48 | -18.441 | -7.084  | 32.621 | 1.00 | 51.77     | C0 |
| ANISOU13464 | C    | VAL E 48 | 5850    | 8020    | 5800   | 100  | 90 530    | C0 |
| ATOM 13465  | O    | VAL E 48 | -18.939 | -7.641  | 31.627 | 1.00 | 50.70     | O0 |
| ANISOU13465 | O    | VAL E 48 | 5690    | 7830    | 5740   | 130  | 190 530   | O0 |
| ATOM 13466  | CB   | VAL E 48 | -16.279 | -8.245  | 33.298 | 1.00 | 53.76     | C0 |
| ANISOU13466 | CB   | VAL E 48 | 5990    | 8270    | 6160   | 140  | -110 680  | C0 |
| ATOM 13467  | CG1  | VAL E 48 | -15.630 | -9.202  | 34.287 | 1.00 | 55.39     | C0 |
| ANISOU13467 | CG1  | VAL E 48 | 6200    | 8500    | 6340   | 170  | -230 800  | C0 |
| ATOM 13468  | CG2  | VAL E 48 | -16.146 | -8.781  | 31.881 | 1.00 | 53.30     | C0 |
| ANISOU13468 | CG2  | VAL E 48 | 5850    | 8130    | 6270   | 190  | -10 680   | C0 |
| ATOM 13469  | H    | VAL E 48 | -18.712 | -9.612  | 33.033 | 1.00 | 50.93     | H0 |
| ANISOU13469 | H    | VAL E 48 | 5780    | 7870    | 5700   | 140  | 100 720   | H0 |
| ATOM 13470  | HA   | VAL E 48 | -17.757 | -7.475  | 34.523 | 1.00 | 53.15     | H0 |
| ANISOU13470 | HA   | VAL E 48 | 6090    | 8270    | 5840   | 80   | -70 620   | H0 |
| ATOM 13471  | HB   | VAL E 48 | -15.786 | -7.389  | 33.343 | 1.00 | 53.93     | H0 |
| ANISOU13471 | HB   | VAL E 48 | 5980    | 8320    | 6190   | 110  | -150 630  | H0 |



|                           |         |         |        |      |       |     |    |
|---------------------------|---------|---------|--------|------|-------|-----|----|
| ATOM 13472 HG11 VAL E 48  | -15.883 | -8.954  | 35.193 | 1.00 | 55.89 | H0  |    |
| ANISOU13472 HG11 VAL E 48 | 6340    | 8610    | 6280   | 140  | -280  | 800 | H0 |
| ATOM 13473 HG12 VAL E 48  | -14.662 | -9.155  | 34.197 | 1.00 | 55.92 | H0  |    |
| ANISOU13473 HG12 VAL E 48 | 6180    | 8580    | 6490   | 190  | -300  | 810 | H0 |
| ATOM 13474 HG13 VAL E 48  | -15.929 | -10.110 | 34.104 | 1.00 | 55.26 | H0  |    |
| ANISOU13474 HG13 VAL E 48 | 6210    | 8440    | 6350   | 210  | -190  | 860 | H0 |
| ATOM 13475 HG21 VAL E 48  | -16.729 | -9.552  | 31.768 | 1.00 | 52.92 | H0  |    |
| ANISOU13475 HG21 VAL E 48 | 5850    | 8050    | 6210   | 210  | 50    | 720 | H0 |
| ATOM 13476 HG22 VAL E 48  | -15.224 | -9.048  | 31.722 | 1.00 | 53.72 | H0  |    |
| ANISOU13476 HG22 VAL E 48 | 5820    | 8180    | 6410   | 220  | -60   | 720 | H0 |
| ATOM 13477 HG23 VAL E 48  | -16.395 | -8.091  | 31.244 | 1.00 | 52.42 | H0  |    |
| ANISOU13477 HG23 VAL E 48 | 5730    | 8010    | 6180   | 170  | 50    | 610 | H0 |
| ATOM 13478 N ASPE 49      | -18.476 | -5.773  | 32.860 | 1.00 | 52.47 | N0  |    |
| ANISOU13478 N ASPE 49     | 5980    | 8130    | 5830   | 70   | 80    | 440 | N0 |
| ATOM 13479 CA ASPE 49     | -19.004 | -4.739  | 31.934 | 1.00 | 52.21 | C0  |    |
| ANISOU13479 CA ASPE 49    | 5960    | 8060    | 5820   | 80   | 160   | 340 | C0 |
| ATOM 13480 C ASPE 49      | -17.785 | -3.953  | 31.438 | 1.00 | 52.00 | C0  |    |
| ANISOU13480 C ASPE 49     | 5890    | 7990    | 5880   | 40   | 100   | 310 | C0 |
| ATOM 13481 O ASPE 49      | -17.119 | -3.316  | 32.284 | 1.00 | 52.87 | O0  |    |
| ANISOU13481 O ASPE 49     | 6020    | 8130    | 5940   | -10  | 10    | 290 | O0 |
| ATOM 13482 CB ASPE 49     | -20.070 | -3.909  | 32.658 | 1.00 | 53.51 | C0  |    |
| ANISOU13482 CB ASPE 49    | 6230    | 8270    | 5830   | 90   | 190   | 260 | C0 |
| ATOM 13483 CG ASPE 49     | -20.893 | -2.982  | 31.781 | 1.00 | 53.98 | C0  |    |
| ANISOU13483 CG ASPE 49    | 6320    | 8290    | 5890   | 130  | 280   | 170 | C0 |
| ATOM 13484 OD1 ASPE 49    | -20.584 | -2.868  | 30.582 | 1.00 | 55.16 | O0  |    |
| ANISOU13484 OD1 ASPE 49   | 6430    | 8370    | 6160   | 140  | 300   | 170 | O0 |
| ATOM 13485 OD2 ASPE 49    | -21.835 | -2.366  | 32.317 | 1.00 | 55.67 | O0  |    |
| ANISOU13485 OD2 ASPE 49   | 6610    | 8540    | 6000   | 160  | 310   | 100 | O0 |
| ATOM 13486 H ASPE 49      | -18.164 | -5.419  | 33.639 | 1.00 | 53.19 | H0  |    |
| ANISOU13486 H ASPE 49     | 6100    | 8260    | 5850   | 50   | 10    | 430 | H0 |
| ATOM 13487 HA ASPE 49     | -19.426 | -5.191  | 31.167 | 1.00 | 51.51 | H0  |    |
| ANISOU13487 HA ASPE 49    | 5850    | 7940    | 5780   | 110  | 230   | 350 | H0 |
| ATOM 13488 HB2 ASPE 49    | -20.686 | -4.520  | 33.111 | 1.00 | 53.67 | H0  |    |
| ANISOU13488 HB2 ASPE 49   | 6270    | 8330    | 5790   | 90   | 220   | 290 | H0 |
| ATOM 13489 HB3 ASPE 49    | -19.630 | -3.363  | 33.340 | 1.00 | 54.24 | H0  |    |
| ANISOU13489 HB3 ASPE 49   | 6370    | 8380    | 5860   | 50   | 120   | 240 | H0 |
| ATOM 13490 N VAL E 50     | -17.476 | -4.054  | 30.139 | 1.00 | 50.71 | N0  |    |
| ANISOU13490 N VAL E 50    | 5660    | 7760    | 5850   | 60   | 160   | 310 | N0 |
| ATOM 13491 CA VAL E 50    | -16.208 | -3.563  | 29.517 | 1.00 | 50.38 | C0  |    |
| ANISOU13491 CA VAL E 50   | 5540    | 7690    | 5920   | 10   | 140   | 300 | C0 |
| ATOM 13492 C VAL E 50     | -16.531 | -2.567  | 28.396 | 1.00 | 48.67 | C0  |    |
| ANISOU13492 C VAL E 50    | 5380    | 7390    | 5720   | -10  | 220   | 220 | C0 |
| ATOM 13493 O VAL E 50     | -17.500 | -2.803  | 27.645 | 1.00 | 47.41 | O0  |    |
| ANISOU13493 O VAL E 50    | 5250    | 7200    | 5560   | 50   | 310   | 210 | O0 |
| ATOM 13494 CB VAL E 50    | -15.361 | -4.730  | 28.970 | 1.00 | 51.20 | C0  |    |
| ANISOU13494 CB VAL E 50   | 5510    | 7790    | 6160   | 40   | 140   | 370 | C0 |
| ATOM 13495 CG1 VAL E 50   | -13.993 | -4.265  | 28.504 | 1.00 | 52.40 | C0  |    |
| ANISOU13495 CG1 VAL E 50  | 5550    | 7940    | 6420   | -20  | 120   | 360 | C0 |
| ATOM 13496 CG2 VAL E 50   | -15.207 | -5.847  | 29.987 | 1.00 | 52.72 | C0  |    |
| ANISOU13496 CG2 VAL E 50  | 5670    | 8030    | 6330   | 80   | 60    | 460 | C0 |
| ATOM 13497 H VAL E 50     | -18.040 | -4.438  | 29.536 | 1.00 | 50.04 | H0  |    |
| ANISOU13497 H VAL E 50    | 5570    | 7660    | 5790   | 90   | 230   | 310 | H0 |
| ATOM 13498 HA VAL E 50    | -15.690 | -3.100  | 30.200 | 1.00 | 51.21 | H0  |    |
| ANISOU13498 HA VAL E 50   | 5650    | 7820    | 5990   | -40  | 60    | 280 | H0 |

|                           |         |        |        |      |       |     |    |
|---------------------------|---------|--------|--------|------|-------|-----|----|
| ATOM 13499 HB VAL E 50    | -15.838 | -5.100 | 28.186 | 1.00 | 50.57 | H0  |    |
| ANISOU13499 HB VAL E 50   | 5430    | 7670   | 6110   | 80   | 230   | 370 | H0 |
| ATOM 13500 HG11 VAL E 50  | -14.092 | -3.645 | 27.762 | 1.00 | 51.84 | H0  |    |
| ANISOU13500 HG11 VAL E 50 | 5500    | 7820   | 6370   | -50  | 180   | 310 | H0 |
| ATOM 13501 HG12 VAL E 50  | -13.470 | -5.033 | 28.216 | 1.00 | 52.49 | H0  |    |
| ANISOU13501 HG12 VAL E 50 | 5470    | 7960   | 6520   | 20   | 120   | 410 | H0 |
| ATOM 13502 HG13 VAL E 50  | -13.534 | -3.820 | 29.238 | 1.00 | 53.05 | H0  |    |
| ANISOU13502 HG13 VAL E 50 | 5620    | 8070   | 6470   | -60  | 30    | 350 | H0 |
| ATOM 13503 HG21 VAL E 50  | -14.853 | -5.484 | 30.817 | 1.00 | 53.22 | H0  |    |
| ANISOU13503 HG21 VAL E 50 | 5740    | 8140   | 6340   | 50   | -20   | 460 | H0 |
| ATOM 13504 HG22 VAL E 50  | -14.596 | -6.520 | 29.641 | 1.00 | 52.72 | H0  |    |
| ANISOU13504 HG22 VAL E 50 | 5590    | 8020   | 6420   | 120  | 60    | 510 | H0 |
| ATOM 13505 HG23 VAL E 50  | -16.074 | -6.254 | 30.155 | 1.00 | 52.03 | H0  |    |
| ANISOU13505 HG23 VAL E 50 | 5650    | 7940   | 6180   | 110  | 100   | 470 | H0 |
| ATOM 13506 N VAL E 51     | -15.722 | -1.509 | 28.285 | 1.00 | 48.05 | N0  |    |
| ANISOU13506 N VAL E 51    | 5310    | 7290   | 5660   | -90  | 190   | 180 | N0 |
| ATOM 13507 CA VAL E 51    | -15.660 | -0.595 | 27.106 | 1.00 | 47.32 | C0  |    |
| ANISOU13507 CA VAL E 51   | 5270    | 7100   | 5600   | -130 | 260   | 120 | C0 |
| ATOM 13508 C VAL E 51     | -14.326 | -0.867 | 26.402 | 1.00 | 47.68 | C0  |    |
| ANISOU13508 C VAL E 51    | 5180    | 7150   | 5780   | -190 | 280   | 150 | C0 |
| ATOM 13509 O VAL E 51     | -13.281 | -0.792 | 27.076 | 1.00 | 48.83 | O0  |    |
| ANISOU13509 O VAL E 51    | 5230    | 7360   | 5960   | -260 | 190   | 160 | O0 |
| ATOM 13510 CB VAL E 51    | -15.800 | 0.885  | 27.509 | 1.00 | 47.97 | C0  |    |
| ANISOU13510 CB VAL E 51   | 5510    | 7130   | 5590   | -180 | 230   | 40  | C0 |
| ATOM 13511 CG1 VAL E 51   | -15.748 | 1.810  | 26.299 | 1.00 | 47.74 | C0  |    |
| ANISOU13511 CG1 VAL E 51  | 5560    | 6990   | 5590   | -220 | 300   | 10  | C0 |
| ATOM 13512 CG2 VAL E 51   | -17.058 | 1.138  | 28.323 | 1.00 | 47.98 | C0  |    |
| ANISOU13512 CG2 VAL E 51  | 5630    | 7150   | 5460   | -100 | 220   | 10  | C0 |
| ATOM 13513 H VAL E 51     | -15.141 | -1.273 | 28.946 | 1.00 | 49.02 | H0  |    |
| ANISOU13513 H VAL E 51    | 5420    | 7440   | 5770   | -140 | 110   | 170 | H0 |
| ATOM 13514 HA VAL E 51    | -16.384 | -0.822 | 26.502 | 1.00 | 46.64 | H0  |    |
| ANISOU13514 HA VAL E 51   | 5220    | 6990   | 5510   | -70  | 320   | 130 | H0 |
| ATOM 13515 HB VAL E 51    | -15.025 | 1.105  | 28.084 | 1.00 | 48.82 | H0  |    |
| ANISOU13515 HB VAL E 51   | 5580    | 7270   | 5700   | -260 | 160   | 40  | H0 |
| ATOM 13516 HG11 VAL E 51  | -14.836 | 1.859  | 25.965 | 1.00 | 48.26 | H0  |    |
| ANISOU13516 HG11 VAL E 51 | 5560    | 7050   | 5720   | -300 | 300   | 20  | H0 |
| ATOM 13517 HG12 VAL E 51  | -16.046 | 2.700  | 26.557 | 1.00 | 48.20 | H0  |    |
| ANISOU13517 HG12 VAL E 51 | 5750    | 7000   | 5570   | -240 | 280   | -50 | H0 |
| ATOM 13518 HG13 VAL E 51  | -16.331 | 1.464  | 25.601 | 1.00 | 47.04 | H0  |    |
| ANISOU13518 HG13 VAL E 51 | 5480    | 6880   | 5510   | -160 | 360   | 20  | H0 |
| ATOM 13519 HG21 VAL E 51  | -17.836 | 0.843  | 27.818 | 1.00 | 47.20 | H0  |    |
| ANISOU13519 HG21 VAL E 51 | 5540    | 7040   | 5360   | -30  | 280   | 10  | H0 |
| ATOM 13520 HG22 VAL E 51  | -17.137 | 2.089  | 28.513 | 1.00 | 48.44 | H0  |    |
| ANISOU13520 HG22 VAL E 51 | 5790    | 7160   | 5460   | -130 | 200   | -50 | H0 |
| ATOM 13521 HG23 VAL E 51  | -17.009 | 0.644  | 29.160 | 1.00 | 48.17 | H0  |    |
| ANISOU13521 HG23 VAL E 51 | 5610    | 7240   | 5450   | -100 | 170   | 30  | H0 |
| ATOM 13522 N PHE E 52     | -14.366 | -1.190 | 25.107 | 1.00 | 46.93 | N0  |    |
| ANISOU13522 N PHE E 52    | 5060    | 7010   | 5760   | -170 | 380   | 160 | N0 |
| ATOM 13523 CA PHE E 52    | -13.192 | -1.621 | 24.308 | 1.00 | 47.35 | C0  |    |
| ANISOU13523 CA PHE E 52   | 4970    | 7070   | 5950   | -210 | 430   | 190 | C0 |
| ATOM 13524 C PHE E 52     | -13.409 | -1.246 | 22.841 | 1.00 | 47.50 | C0  |    |
| ANISOU13524 C PHE E 52    | 5060    | 7000   | 5980   | -230 | 560   | 160 | C0 |
| ATOM 13525 O PHE E 52     | -14.568 | -1.251 | 22.388 | 1.00 | 46.76 | O0  |    |
| ANISOU13525 O PHE E 52    | 5090    | 6860   | 5820   | -160 | 600   | 150 | O0 |

|                          |         |        |        |      |       |     |    |
|--------------------------|---------|--------|--------|------|-------|-----|----|
| ATOM 13526 CB PHE E 52   | -12.971 | -3.129 | 24.467 | 1.00 | 47.00 |     | C0 |
| ANISOU13526 CB PHE E 52  | 4800    | 7080   | 5980   | -120 | 430   | 260 | C0 |
| ATOM 13527 CG PHE E 52   | -14.121 | -3.990 | 24.006 | 1.00 | 45.75 |     | C0 |
| ANISOU13527 CG PHE E 52  | 4710    | 6880   | 5790   | -20  | 490   | 280 | C0 |
| ATOM 13528 CD1 PHE E 52  | -15.145 | -4.337 | 24.874 | 1.00 | 45.47 |     | C0 |
| ANISOU13528 CD1 PHE E 52 | 4740    | 6870   | 5670   | 40   | 450   | 290 | C0 |
| ATOM 13529 CD2 PHE E 52  | -14.181 | -4.455 | 22.700 | 1.00 | 45.60 |     | C0 |
| ANISOU13529 CD2 PHE E 52 | 4680    | 6810   | 5830   | 10   | 610   | 270 | C0 |
| ATOM 13530 CE1 PHE E 52  | -16.204 | -5.124 | 24.447 | 1.00 | 44.68 |     | C0 |
| ANISOU13530 CE1 PHE E 52 | 4690    | 6750   | 5540   | 100  | 510   | 310 | C0 |
| ATOM 13531 CE2 PHE E 52  | -15.243 | -5.238 | 22.273 | 1.00 | 44.85 |     | C0 |
| ANISOU13531 CE2 PHE E 52 | 4650    | 6680   | 5710   | 80   | 660   | 290 | C0 |
| ATOM 13532 CZ PHE E 52   | -16.254 | -5.571 | 23.147 | 1.00 | 44.40 |     | C0 |
| ANISOU13532 CZ PHE E 52  | 4650    | 6650   | 5570   | 120  | 610   | 300 | C0 |
| ATOM 13533 H PHE E 52    | -15.133 | -1.171 | 24.615 | 1.00 | 46.27 |     | H0 |
| ANISOU13533 H PHE E 52   | 5050    | 6880   | 5650   | -120 | 430   | 150 | H0 |
| ATOM 13534 HA PHE E 52   | -12.390 | -1.145 | 24.640 | 1.00 | 48.36 |     | H0 |
| ANISOU13534 HA PHE E 52  | 5050    | 7230   | 6100   | -290 | 390   | 180 | H0 |
| ATOM 13535 HB2 PHE E 52  | -12.169 | -3.378 | 23.963 | 1.00 | 47.56 |     | H0 |
| ANISOU13535 HB2 PHE E 52 | 4770    | 7160   | 6140   | -130 | 470   | 270 | H0 |
| ATOM 13536 HB3 PHE E 52  | -12.798 | -3.316 | 25.414 | 1.00 | 47.48 |     | H0 |
| ANISOU13536 HB3 PHE E 52 | 4820    | 7200   | 6020   | -110 | 340   | 280 | H0 |
| ATOM 13537 HD1 PHE E 52  | -15.122 | -4.029 | 25.766 | 1.00 | 45.82 |     | H0 |
| ANISOU13537 HD1 PHE E 52 | 4800    | 6950   | 5660   | 20   | 370   | 290 | H0 |
| ATOM 13538 HD2 PHE E 52  | -13.495 | -4.227 | 22.093 | 1.00 | 45.99 |     | H0 |
| ANISOU13538 HD2 PHE E 52 | 4690    | 6850   | 5940   | -30  | 660   | 260 | H0 |
| ATOM 13539 HE1 PHE E 52  | -16.895 | -5.348 | 25.049 | 1.00 | 44.48 |     | H0 |
| ANISOU13539 HE1 PHE E 52 | 4700    | 6750   | 5450   | 120  | 480   | 320 | H0 |
| ATOM 13540 HE2 PHE E 52  | -15.270 | -5.546 | 21.382 | 1.00 | 44.63 |     | H0 |
| ANISOU13540 HE2 PHE E 52 | 4630    | 6620   | 5710   | 90   | 730   | 280 | H0 |
| ATOM 13541 HZ PHE E 52   | -16.973 | -6.110 | 22.858 | 1.00 | 43.89 |     | H0 |
| ANISOU13541 HZ PHE E 52  | 4620    | 6580   | 5480   | 150  | 640   | 310 | H0 |
| ATOM 13542 N TRPE 53     | -12.329 | -0.936 | 22.119 | 1.00 | 49.05 |     | N0 |
| ANISOU13542 N TRPE 53    | 5190    | 7190   | 6260   | -320 | 610   | 160 | N0 |
| ATOM 13543 CA TRPE 53    | -12.359 | -0.819 | 20.637 | 1.00 | 49.53 |     | C0 |
| ANISOU13543 CA TRPE 53   | 5300    | 7180   | 6340   | -340 | 750   | 140 | C0 |
| ATOM 13544 C TRPE 53     | -12.214 | -2.221 | 20.044 | 1.00 | 49.01 |     | C0 |
| ANISOU13544 C TRPE 53    | 5120    | 7140   | 6360   | -250 | 820   | 180 | C0 |
| ATOM 13545 O TRPE 53     | -11.232 | -2.892 | 20.393 | 1.00 | 49.06 |     | O0 |
| ANISOU13545 O TRPE 53    | 4950    | 7220   | 6470   | -240 | 810   | 200 | O0 |
| ATOM 13546 CB TRPE 53    | -11.267 | 0.115  | 20.105 | 1.00 | 50.93 |     | C0 |
| ANISOU13546 CB TRPE 53   | 5460    | 7340   | 6550   | -500 | 800   | 120 | C0 |
| ATOM 13547 CG TRPE 53    | -11.214 | 1.460  | 20.757 | 1.00 | 51.63 |     | C0 |
| ANISOU13547 CG TRPE 53   | 5670    | 7390   | 6560   | -610 | 720   | 80  | C0 |
| ATOM 13548 CD1 TRPE 53   | -12.196 | 2.082  | 21.471 | 1.00 | 50.84 |     | C0 |
| ANISOU13548 CD1 TRPE 53  | 5730    | 7240   | 6350   | -570 | 640   | 60  | C0 |
| ATOM 13549 CD2 TRPE 53   | -10.110 | 2.378  | 20.709 | 1.00 | 53.45 |     | C0 |
| ANISOU13549 CD2 TRPE 53  | 5870    | 7620   | 6820   | -800 | 730   | 50  | C0 |
| ATOM 13550 NE1 TRPE 53   | -11.770 | 3.314  | 21.886 | 1.00 | 52.05 |     | N0 |
| ANISOU13550 NE1 TRPE 53  | 5980    | 7340   | 6450   | -700 | 590   | 10  | N0 |
| ATOM 13551 CE2 TRPE 53   | -10.497 | 3.525  | 21.433 | 1.00 | 53.61 |     | C0 |
| ANISOU13551 CE2 TRPE 53  | 6070    | 7570   | 6730   | -860 | 640   | 10  | C0 |
| ATOM 13552 CE3 TRPE 53   | -8.835  | 2.334  | 20.136 | 1.00 | 55.19 |     | C0 |
| ANISOU13552 CE3 TRPE 53  | 5930    | 7900   | 7140   | -920 | 810   | 50  | C0 |

|                          |         |        |        |       |       |     |    |
|--------------------------|---------|--------|--------|-------|-------|-----|----|
| ATOM 13553 CZ2 TRP E 53  | -9.648  | 4.617  | 21.601 | 1.00  | 55.56 |     | C0 |
| ANISOU13553 CZ2 TRP E 53 | 6350    | 7790   | 6970   | -1050 | 620   | -30 | C0 |
| ATOM 13554 CZ3 TRP E 53  | -7.997  | 3.415  | 20.304 | 1.00  | 57.24 |     | C0 |
| ANISOU13554 CZ3 TRP E 53 | 6200    | 8150   | 7400   | -1120 | 790   | 20  | C0 |
| ATOM 13555 CH2 TRP E 53  | -8.400  | 4.538  | 21.027 | 1.00  | 57.03 |     | C0 |
| ANISOU13555 CH2 TRP E 53 | 6370    | 8040   | 7260   | -1200 | 690   | -20 | C0 |
| ATOM 13556 H TRP E 53    | -11.508 | -0.786 | 22.485 | 1.00  | 49.91 |     | H0 |
| ANISOU13556 H TRP E 53   | 5210    | 7350   | 6410   | -380  | 580   | 150 | H0 |
| ATOM 13557 HA TRP E 53   | -13.232 | -0.447 | 20.376 | 1.00  | 48.74 |     | H0 |
| ANISOU13557 HA TRP E 53  | 5340    | 7020   | 6160   | -310  | 760   | 130 | H0 |
| ATOM 13558 HB2 TRP E 53  | -10.402 | -0.328 | 20.223 | 1.00  | 51.63 |     | H0 |
| ANISOU13558 HB2 TRP E 53 | 5390    | 7500   | 6720   | -520  | 800   | 130 | H0 |
| ATOM 13559 HB3 TRP E 53  | -11.409 | 0.234  | 19.143 | 1.00  | 50.78 |     | H0 |
| ANISOU13559 HB3 TRP E 53 | 5510    | 7260   | 6520   | -510  | 890   | 110 | H0 |
| ATOM 13560 HD1 TRP E 53  | -13.047 | 1.718  | 21.661 | 1.00  | 50.13 |     | H0 |
| ANISOU13560 HD1 TRP E 53 | 5680    | 7150   | 6220   | -460  | 620   | 60  | H0 |
| ATOM 13561 HE1 TRP E 53  | -12.242 | 3.878  | 22.365 | 1.00  | 52.17 |     | H0 |
| ANISOU13561 HE1 TRP E 53 | 6110    | 7320   | 6400   | -690  | 540   | -10 | H0 |
| ATOM 13562 HE3 TRP E 53  | -8.554  | 1.577  | 19.648 | 1.00  | 55.07 |     | H0 |
| ANISOU13562 HE3 TRP E 53 | 5800    | 7930   | 7200   | -870  | 870   | 70  | H0 |
| ATOM 13563 HZ2 TRP E 53  | -9.920  | 5.374  | 22.089 | 1.00  | 55.85 |     | H0 |
| ANISOU13563 HZ2 TRP E 53 | 6520    | 7760   | 6930   | -1090 | 560   | -60 | H0 |
| ATOM 13564 HZ3 TRP E 53  | -7.134  | 3.397  | 19.921 | 1.00  | 57.97 |     | H0 |
| ANISOU13564 HZ3 TRP E 53 | 6170    | 8300   | 7560   | -1220 | 850   | 10  | H0 |
| ATOM 13565 HH2 TRP E 53  | -7.807  | 5.259  | 21.122 | 1.00  | 58.28 |     | H0 |
| ANISOU13565 HH2 TRP E 53 | 6540    | 8190   | 7410   | -1350 | 680   | -50 | H0 |
| ATOM 13566 N GLN E 54    | -13.169 | -2.644 | 19.213 | 1.00  | 48.68 |     | N0 |
| ANISOU13566 N GLN E 54   | 5180    | 7040   | 6270   | -180  | 890   | 180 | N0 |
| ATOM 13567 CA GLN E 54   | -13.098 | -3.910 | 18.437 | 1.00  | 49.36 |     | C0 |
| ANISOU13567 CA GLN E 54  | 5210    | 7120   | 6420   | -110  | 980   | 200 | C0 |
| ATOM 13568 C GLN E 54    | -12.477 | -3.582 | 17.075 | 1.00  | 50.13 |     | C0 |
| ANISOU13568 C GLN E 54   | 5320    | 7180   | 6540   | -180  | 1110  | 170 | C0 |
| ATOM 13569 O GLN E 54    | -13.226 | -3.290 | 16.125 | 1.00  | 49.44 |     | O0 |
| ANISOU13569 O GLN E 54   | 5390    | 7020   | 6370   | -190  | 1170  | 150 | O0 |
| ATOM 13570 CB GLN E 54   | -14.478 | -4.559 | 18.323 | 1.00  | 48.88 |     | C0 |
| ANISOU13570 CB GLN E 54  | 5250    | 7030   | 6290   | -20   | 970   | 210 | C0 |
| ATOM 13571 CG GLN E 54   | -14.427 | -6.000 | 17.839 | 1.00  | 49.51 |     | C0 |
| ANISOU13571 CG GLN E 54  | 5280    | 7100   | 6430   | 50    | 1040  | 230 | C0 |
| ATOM 13572 CD GLN E 54   | -15.695 | -6.750 | 18.165 | 1.00  | 49.35 |     | C0 |
| ANISOU13572 CD GLN E 54  | 5330    | 7070   | 6350   | 110   | 1000  | 240 | C0 |
| ATOM 13573 OE1 GLN E 54  | -16.052 | -6.932 | 19.327 | 1.00  | 50.26 |     | O0 |
| ANISOU13573 OE1 GLN E 54 | 5420    | 7230   | 6440   | 140   | 910   | 270 | O0 |
| ATOM 13574 NE2 GLN E 54  | -16.396 | -7.188 | 17.134 | 1.00  | 50.07 |     | N0 |
| ANISOU13574 NE2 GLN E 54 | 5500    | 7120   | 6400   | 120   | 1060  | 220 | N0 |
| ATOM 13575 H GLN E 54    | -13.936 | -2.173 | 19.070 | 1.00  | 48.23 |     | H0 |
| ANISOU13575 H GLN E 54   | 5250    | 6940   | 6140   | -170  | 880   | 160 | H0 |
| ATOM 13576 HA GLN E 54   | -12.499 | -4.530 | 18.913 | 1.00  | 49.80 |     | H0 |
| ANISOU13576 HA GLN E 54  | 5140    | 7230   | 6550   | -80   | 960   | 220 | H0 |
| ATOM 13577 HB2 GLN E 54  | -14.908 | -4.530 | 19.204 | 1.00  | 48.59 |     | H0 |
| ANISOU13577 HB2 GLN E 54 | 5220    | 7020   | 6220   | 0     | 890   | 220 | H0 |
| ATOM 13578 HB3 GLN E 54  | -15.025 | -4.030 | 17.705 | 1.00  | 48.57 |     | H0 |
| ANISOU13578 HB3 GLN E 54 | 5320    | 6950   | 6190   | -40   | 1000  | 180 | H0 |
| ATOM 13579 HG2 GLN E 54  | -14.285 | -6.011 | 16.869 | 1.00  | 49.68 |     | H0 |
| ANISOU13579 HG2 GLN E 54 | 5330    | 7080   | 6460   | 30    | 1120  | 210 | H0 |

|                           |         |        |        |      |       |     |
|---------------------------|---------|--------|--------|------|-------|-----|
| ATOM 13580 HG3 GLN E 54   | -13.668 | -6.457 | 18.260 | 1.00 | 50.10 | H0  |
| ANISOU13580 HG3 GLN E 54  | 5240    | 7210   | 6590   | 70   | 1030  | 250 |
| ATOM 13581 HE21 GLN E 54  | -16.885 | -7.922 | 17.212 | 1.00 | 49.53 | H0  |
| ANISOU13581 HE21 GLN E 54 | 5450    | 7040   | 6330   | 150  | 1060  | 230 |
| ATOM 13582 HE22 GLN E 54  | -16.380 | -6.748 | 16.367 | 1.00 | 49.78 | H0  |
| ANISOU13582 HE22 GLN E 54 | 5520    | 7050   | 6340   | 90   | 1110  | 200 |
| ATOM 13583 N GLN E 55     | -11.146 | -3.606 | 17.010 | 1.00 | 51.14 | N0  |
| ANISOU13583 N GLN E 55    | 5300    | 7360   | 6780   | -240 | 1160  | 170 |
| ATOM 13584 CA GLN E 55    | -10.362 | -3.200 | 15.818 | 1.00 | 52.71 | C0  |
| ANISOU13584 CA GLN E 55   | 5490    | 7540   | 7000   | -330 | 1310  | 140 |
| ATOM 13585 C GLN E 55     | -10.428 | -4.332 | 14.789 | 1.00 | 51.83 | C0  |
| ANISOU13585 C GLN E 55    | 5380    | 7400   | 6920   | -250 | 1440  | 130 |
| ATOM 13586 O GLN E 55     | -9.814  | -5.385 | 15.029 | 1.00 | 51.72 | O0  |
| ANISOU13586 O GLN E 55    | 5200    | 7430   | 7010   | -160 | 1460  | 140 |
| ATOM 13587 CB GLN E 55    | -8.929  | -2.856 | 16.225 | 1.00 | 55.18 | C0  |
| ANISOU13587 CB GLN E 55   | 5600    | 7950   | 7420   | -430 | 1310  | 130 |
| ATOM 13588 CG GLN E 55    | -8.856  | -1.856 | 17.372 | 1.00 | 55.97 | C0  |
| ANISOU13588 CG GLN E 55   | 5710    | 8070   | 7480   | -510 | 1170  | 130 |
| ATOM 13589 CD GLN E 55    | -7.465  | -1.308 | 17.569 | 1.00 | 58.50 | C0  |
| ANISOU13589 CD GLN E 55   | 5860    | 8480   | 7890   | -660 | 1180  | 120 |
| ATOM 13590 OE1 GLN E 55   | -6.483  | -2.045 | 17.581 | 1.00 | 60.55 | O0  |
| ANISOU13590 OE1 GLN E 55  | 5880    | 8850   | 8270   | -620 | 1210  | 120 |
| ATOM 13591 NE2 GLN E 55   | -7.370  | 0.001  | 17.736 | 1.00 | 59.91 | N0  |
| ANISOU13591 NE2 GLN E 55  | 6140    | 8630   | 8000   | -820 | 1140  | 90  |
| ATOM 13592 H GLN E 55     | -10.633 | -3.903 | 17.701 | 1.00 | 51.78 | H0  |
| ANISOU13592 H GLN E 55    | 5260    | 7500   | 6920   | -220 | 1110  | 180 |
| ATOM 13593 HA GLN E 55    | -10.782 | -2.399 | 15.434 | 1.00 | 52.38 | H0  |
| ANISOU13593 HA GLN E 55   | 5590    | 7440   | 6870   | -390 | 1320  | 130 |
| ATOM 13594 HB2 GLN E 55   | -8.472  | -3.679 | 16.488 | 1.00 | 55.52 | H0  |
| ANISOU13594 HB2 GLN E 55  | 5500    | 8040   | 7550   | -350 | 1310  | 150 |
| ATOM 13595 HB3 GLN E 55   | -8.462  | -2.488 | 15.447 | 1.00 | 55.86 | H0  |
| ANISOU13595 HB3 GLN E 55  | 5700    | 8020   | 7510   | -510 | 1420  | 110 |
| ATOM 13596 HG2 GLN E 55   | -9.473  | -1.114 | 17.192 | 1.00 | 55.51 | H0  |
| ANISOU13596 HG2 GLN E 55  | 5820    | 7940   | 7330   | -560 | 1160  | 120 |
| ATOM 13597 HG3 GLN E 55   | -9.146  | -2.291 | 18.201 | 1.00 | 55.52 | H0  |
| ANISOU13597 HG3 GLN E 55  | 5620    | 8050   | 7430   | -440 | 1070  | 150 |
| ATOM 13598 HE21 GLN E 55  | -6.693  | 0.340  | 18.191 | 1.00 | 60.63 | H0  |
| ANISOU13598 HE21 GLN E 55 | 6130    | 8780   | 8130   | -900 | 1100  | 80  |
| ATOM 13599 HE22 GLN E 55  | -7.981  | 0.537  | 17.390 | 1.00 | 59.07 | H0  |
| ANISOU13599 HE22 GLN E 55 | 6210    | 8430   | 7810   | -840 | 1160  | 80  |
| ATOM 13600 N THR E 56     | -11.160 | -4.107 | 13.695 | 1.00 | 50.79 | N0  |
| ANISOU13600 N THR E 56    | 5430    | 7180   | 6690   | -270 | 1510  | 120 |
| ATOM 13601 CA THR E 56    | -11.443 | -5.098 | 12.624 | 1.00 | 50.35 | C0  |
| ANISOU13601 CA THR E 56   | 5430    | 7080   | 6620   | -210 | 1630  | 100 |
| ATOM 13602 C THR E 56     | -10.942 | -4.542 | 11.285 | 1.00 | 50.44 | C0  |
| ANISOU13602 C THR E 56    | 5520    | 7060   | 6580   | -310 | 1780  | 70  |
| ATOM 13603 O THR E 56     | -11.418 | -3.458 | 10.879 | 1.00 | 48.79 | O0  |
| ANISOU13603 O THR E 56    | 5480    | 6790   | 6260   | -400 | 1770  | 70  |
| ATOM 13604 CB THR E 56    | -12.939 | -5.436 | 12.601 | 1.00 | 49.33 | C0  |
| ANISOU13604 CB THR E 56   | 5450    | 6900   | 6390   | -140 | 1550  | 110 |
| ATOM 13605 OG1 THR E 56   | -13.389 | -5.524 | 13.953 | 1.00 | 50.05 | O0  |
| ANISOU13605 OG1 THR E 56  | 5490    | 7030   | 6490   | -80  | 1400  | 140 |
| ATOM 13606 CG2 THR E 56   | -13.243 | -6.738 | 11.898 | 1.00 | 49.75 | C0  |
| ANISOU13606 CG2 THR E 56  | 5540    | 6920   | 6450   | -60  | 1630  | 90  |

|                           |         |        |        |      |       |      |    |
|---------------------------|---------|--------|--------|------|-------|------|----|
| ATOM 13607 H THR E 56     | -11.549 | -3.301 | 13.525 | 1.00 | 50.62 |      | H0 |
| ANISOU13607 H THR E 56    | 5520    | 7120   | 6590   | -320 | 1490  | 110  | H0 |
| ATOM 13608 HA THR E 56    | -10.944 | -5.918 | 12.829 | 1.00 | 50.72 |      | H0 |
| ANISOU13608 HA THR E 56   | 5350    | 7160   | 6760   | -140 | 1650  | 100  | H0 |
| ATOM 13609 HB THR E 56    | -13.420 | -4.703 | 12.147 | 1.00 | 49.40 |      | H0 |
| ANISOU13609 HB THR E 56   | 5590    | 6870   | 6310   | -180 | 1540  | 100  | H0 |
| ATOM 13610 HG21 THR E 56  | -12.912 | -6.699 | 10.983 | 1.00 | 50.20 |      | H0 |
| ANISOU13610 HG21 THR E 56 | 5640    | 6950   | 6490   | -100 | 1730  | 70   | H0 |
| ATOM 13611 HG22 THR E 56  | -14.206 | -6.885 | 11.888 | 1.00 | 48.86 |      | H0 |
| ANISOU13611 HG22 THR E 56 | 5510    | 6780   | 6270   | -40  | 1570  | 100  | H0 |
| ATOM 13612 HG23 THR E 56  | -12.808 | -7.471 | 12.368 | 1.00 | 49.88 |      | H0 |
| ANISOU13612 HG23 THR E 56 | 5440    | 6960   | 6550   | 0    | 1630  | 100  | H0 |
| ATOM 13613 N THR E 57     | -10.002 | -5.246 | 10.642 | 1.00 | 51.35 |      | N0 |
| ANISOU13613 N THR E 57    | 5530    | 7200   | 6780   | -300 | 1930  | 40   | N0 |
| ATOM 13614 CA THR E 57    | -9.426  | -4.884 | 9.316  | 1.00 | 52.35 |      | C0 |
| ANISOU13614 CA THR E 57   | 5720    | 7310   | 6860   | -410 | 2120  | 10   | C0 |
| ATOM 13615 C THR E 57     | -9.568  | -6.074 | 8.358  | 1.00 | 52.13 |      | C0 |
| ANISOU13615 C THR E 57    | 5740    | 7240   | 6830   | -320 | 2250  | -30  | C0 |
| ATOM 13616 O THR E 57     | -9.453  | -7.229 | 8.813  | 1.00 | 51.06 |      | O0 |
| ANISOU13616 O THR E 57    | 5490    | 7120   | 6790   | -190 | 2230  | -40  | O0 |
| ATOM 13617 CB THR E 57    | -7.978  | -4.388 | 9.446  | 1.00 | 54.19 |      | C0 |
| ANISOU13617 CB THR E 57   | 5750    | 7640   | 7200   | -510 | 2210  | -10  | C0 |
| ATOM 13618 OG1 THR E 57   | -7.113  | -5.483 | 9.744  | 1.00 | 56.00 |      | O0 |
| ANISOU13618 OG1 THR E 57  | 5740    | 7950   | 7590   | -400 | 2260  | -20  | O0 |
| ATOM 13619 CG2 THR E 57   | -7.812  | -3.328 | 10.514 | 1.00 | 54.06 |      | C0 |
| ANISOU13619 CG2 THR E 57  | 5690    | 7650   | 7200   | -600 | 2060  | 20   | C0 |
| ATOM 13620 H THR E 57     | -9.640  | -6.011 | 10.979 | 1.00 | 51.61 |      | H0 |
| ANISOU13620 H THR E 57    | 5440    | 7270   | 6900   | -230 | 1940  | 40   | H0 |
| ATOM 13621 HA THR E 57    | -9.963  | -4.146 | 8.959  | 1.00 | 51.97 |      | H0 |
| ANISOU13621 HA THR E 57   | 5830    | 7210   | 6710   | -470 | 2100  | 10   | H0 |
| ATOM 13622 HB THR E 57    | -7.710  | -4.003 | 8.578  | 1.00 | 55.15 |      | H0 |
| ANISOU13622 HB THR E 57   | 5950    | 7740   | 7270   | -600 | 2330  | -30  | H0 |
| ATOM 13623 HG21 THR E 57  | -8.486  | -2.635 | 10.393 | 1.00 | 53.42 |      | H0 |
| ANISOU13623 HG21 THR E 57 | 5780    | 7500   | 7010   | -650 | 2010  | 30   | H0 |
| ATOM 13624 HG22 THR E 57  | -6.925  | -2.933 | 10.445 | 1.00 | 55.31 |      | H0 |
| ANISOU13624 HG22 THR E 57 | 5740    | 7870   | 7410   | -700 | 2130  | 10   | H0 |
| ATOM 13625 HG23 THR E 57  | -7.918  | -3.732 | 11.394 | 1.00 | 53.52 |      | H0 |
| ANISOU13625 HG23 THR E 57 | 5520    | 7620   | 7190   | -520 | 1960  | 40   | H0 |
| ATOM 13626 N TRPE 58      | -9.835  | -5.788 | 7.080  | 1.00 | 52.71 |      | N0 |
| ANISOU13626 N TRPE 58     | 6000    | 7250   | 6770   | -390 | 2360  | -60  | N0 |
| ATOM 13627 CA TRPE 58     | -9.918  | -6.785 | 5.979  | 1.00 | 53.07 |      | C0 |
| ANISOU13627 CA TRPE 58    | 6140    | 7250   | 6770   | -340 | 2500  | -110 | C0 |
| ATOM 13628 C TRPE 58      | -9.822  | -6.057 | 4.637  | 1.00 | 54.99 |      | C0 |
| ANISOU13628 C TRPE 58     | 6570    | 7450   | 6870   | -480 | 2650  | -130 | C0 |
| ATOM 13629 O TRPE 58      | -9.920  | -4.816 | 4.633  | 1.00 | 54.96 |      | O0 |
| ANISOU13629 O TRPE 58     | 6660    | 7440   | 6790   | -600 | 2600  | -90  | O0 |
| ATOM 13630 CB TRPE 58     | -11.214 | -7.602 | 6.089  | 1.00 | 50.92 |      | C0 |
| ANISOU13630 CB TRPE 58    | 5990    | 6920   | 6440   | -240 | 2390  | -100 | C0 |
| ATOM 13631 CG TRPE 58     | -12.453 | -6.792 | 5.870  | 1.00 | 48.87 |      | C0 |
| ANISOU13631 CG TRPE 58    | 5940    | 6610   | 6020   | -300 | 2260  | -70  | C0 |
| ATOM 13632 CD1 TRPE 58    | -13.108 | -6.604 | 4.688  | 1.00 | 48.76 |      | C0 |
| ANISOU13632 CD1 TRPE 58   | 6150    | 6540   | 5840   | -350 | 2300  | -90  | C0 |
| ATOM 13633 CD2 TRPE 58    | -13.174 | -6.030 | 6.854  | 1.00 | 47.18 |      | C0 |
| ANISOU13633 CD2 TRPE 58   | 5730    | 6410   | 5790   | -290 | 2070  | -20  | C0 |

|                          |         |        |       |      |       |      |    |
|--------------------------|---------|--------|-------|------|-------|------|----|
| ATOM 13634 NE1 TRP E 58  | -14.190 | -5.787 | 4.869 | 1.00 | 47.96 |      | N0 |
| ANISOU13634 NE1 TRP E 58 | 6170    | 6420   | 5630  | -360 | 2140  | -50  | N0 |
| ATOM 13635 CE2 TRP E 58  | -14.257 | -5.418 | 6.186 | 1.00 | 46.67 |      | C0 |
| ANISOU13635 CE2 TRP E 58 | 5880    | 6290   | 5560  | -320 | 2010  | -10  | C0 |
| ATOM 13636 CE3 TRP E 58  | -13.017 | -5.806 | 8.226 | 1.00 | 46.20 |      | C0 |
| ANISOU13636 CE3 TRP E 58 | 5450    | 6340   | 5770  | -250 | 1960  | 10   | C0 |
| ATOM 13637 CZ2 TRP E 58  | -15.173 | -4.604 | 6.848 | 1.00 | 45.59 |      | C0 |
| ANISOU13637 CZ2 TRP E 58 | 5790    | 6160   | 5370  | -300 | 1840  | 30   | C0 |
| ATOM 13638 CZ3 TRP E 58  | -13.920 | -4.996 | 8.876 | 1.00 | 45.32 |      | C0 |
| ANISOU13638 CZ3 TRP E 58 | 5410    | 6220   | 5590  | -250 | 1800  | 40   | C0 |
| ATOM 13639 CH2 TRP E 58  | -14.984 | -4.405 | 8.196 | 1.00 | 44.85 |      | C0 |
| ANISOU13639 CH2 TRP E 58 | 5550    | 6110   | 5380  | -270 | 1750  | 50   | C0 |
| ATOM 13640 H TRP E 58    | -9.989  | -4.936 | 6.796 | 1.00 | 52.66 |      | H0 |
| ANISOU13640 H TRP E 58   | 6100    | 7220   | 6680  | -480 | 2350  | -40  | H0 |
| ATOM 13641 HA TRP E 58   | -9.155  | -7.403 | 6.066 | 1.00 | 54.01 |      | H0 |
| ANISOU13641 HA TRP E 58  | 6110    | 7410   | 7000  | -290 | 2590  | -130 | H0 |
| ATOM 13642 HB2 TRP E 58  | -11.180 | -8.324 | 5.428 | 1.00 | 51.42 |      | H0 |
| ANISOU13642 HB2 TRP E 58 | 6100    | 6950   | 6490  | -210 | 2480  | -140 | H0 |
| ATOM 13643 HB3 TRP E 58  | -11.249 | -8.010 | 6.978 | 1.00 | 50.32 |      | H0 |
| ANISOU13643 HB3 TRP E 58 | 5800    | 6870   | 6450  | -170 | 2300  | -80  | H0 |
| ATOM 13644 HD1 TRP E 58  | -12.858 | -6.986 | 3.860 | 1.00 | 49.69 |      | H0 |
| ANISOU13644 HD1 TRP E 58 | 6330    | 6630   | 5920  | -370 | 2420  | -130 | H0 |
| ATOM 13645 HE1 TRP E 58  | -14.749 | -5.544 | 4.243 | 1.00 | 47.94 |      | H0 |
| ANISOU13645 HE1 TRP E 58 | 6320    | 6380   | 5520  | -380 | 2120  | -50  | H0 |
| ATOM 13646 HE3 TRP E 58  | -12.301 | -6.200 | 8.695 | 1.00 | 46.72 |      | H0 |
| ANISOU13646 HE3 TRP E 58 | 5370    | 6450   | 5940  | -230 | 1980  | 10   | H0 |
| ATOM 13647 HZ2 TRP E 58  | -15.891 | -4.204 | 6.387 | 1.00 | 45.53 |      | H0 |
| ANISOU13647 HZ2 TRP E 58 | 5920    | 6120   | 5260  | -310 | 1790  | 30   | H0 |
| ATOM 13648 HZ3 TRP E 58  | -13.822 | -4.842 | 9.802 | 1.00 | 44.97 |      | H0 |
| ANISOU13648 HZ3 TRP E 58 | 5270    | 6210   | 5600  | -230 | 1720  | 60   | H0 |
| ATOM 13649 HH2 TRP E 58  | -15.589 | -3.861 | 8.669 | 1.00 | 44.40 |      | H0 |
| ANISOU13649 HH2 TRP E 58 | 5530    | 6050   | 5290  | -250 | 1640  | 70   | H0 |
| ATOM 13650 N SER E 59    | -9.644  | -6.810 | 3.548 | 1.00 | 57.78 |      | N0 |
| ANISOU13650 N SER E 59   | 7000    | 7780   | 7180  | -470 | 2810  | -180 | N0 |
| ATOM 13651 CA SER E 59   | -9.588  | -6.306 | 2.149 | 1.00 | 60.24 |      | C0 |
| ANISOU13651 CA SER E 59  | 7520    | 8050   | 7320  | -590 | 2960  | -210 | C0 |
| ATOM 13652 C SER E 59    | -10.893 | -6.643 | 1.418 | 1.00 | 60.34 |      | C0 |
| ANISOU13652 C SER E 59   | 7800    | 7970   | 7160  | -560 | 2890  | -210 | C0 |
| ATOM 13653 O SER E 59    | -11.366 | -7.785 | 1.551 | 1.00 | 59.28 |      | O0 |
| ANISOU13653 O SER E 59   | 7650    | 7810   | 7060  | -450 | 2860  | -250 | O0 |
| ATOM 13654 CB SER E 59   | -8.408  | -6.885 | 1.415 | 1.00 | 62.40 |      | C0 |
| ANISOU13654 CB SER E 59  | 7690    | 8360   | 7650  | -600 | 3220  | -280 | C0 |
| ATOM 13655 OG SER E 59   | -7.211  | -6.690 | 2.152 | 1.00 | 64.24 |      | O0 |
| ANISOU13655 OG SER E 59  | 7640    | 8710   | 8060  | -610 | 3270  | -280 | O0 |
| ATOM 13656 H SER E 59    | -9.541  | -7.714 | 3.588 | 1.00 | 57.79 |      | H0 |
| ANISOU13656 H SER E 59   | 6940    | 7780   | 7240  | -380 | 2850  | -210 | H0 |
| ATOM 13657 HA SER E 59   | -9.490  | -5.317 | 2.177 | 1.00 | 60.30 |      | H0 |
| ANISOU13657 HA SER E 59  | 7570    | 8060   | 7280  | -690 | 2940  | -170 | H0 |
| ATOM 13658 HB2 SER E 59  | -8.553  | -7.848 | 1.271 | 1.00 | 62.62 |      | H0 |
| ANISOU13658 HB2 SER E 59 | 7720    | 8370   | 7700  | -500 | 3250  | -320 | H0 |
| ATOM 13659 HB3 SER E 59  | -8.327  | -6.453 | 0.535 | 1.00 | 63.49 |      | H0 |
| ANISOU13659 HB3 SER E 59 | 7970    | 8480   | 7670  | -700 | 3330  | -290 | H0 |
| ATOM 13660 N ASP E 60    | -11.438 | -5.680 | 0.672 | 1.00 | 61.96 |      | N0 |
| ANISOU13660 N ASP E 60   | 8240    | 8130   | 7180  | -670 | 2860  | -180 | N0 |

|             |     |      |    |         |        |        |       |       |      |    |
|-------------|-----|------|----|---------|--------|--------|-------|-------|------|----|
| ATOM 13661  | CA  | ASPE | 60 | -12.476 | -5.900 | -0.371 | 1.00  | 62.87 | C0   |    |
| ANISOU13661 | CA  | ASPE | 60 | 8620    | 8170   | 7090   | -670  | 2830  | -190 | C0 |
| ATOM 13662  | C   | ASPE | 60 | -11.962 | -5.254 | -1.659 | 1.00  | 65.70 | C0   |    |
| ANISOU13662 | C   | ASPE | 60 | 9170    | 8500   | 7290   | -820  | 3010  | -200 | C0 |
| ATOM 13663  | O   | ASPE | 60 | -12.357 | -4.109 | -1.947 | 1.00  | 66.20 | O0   |    |
| ANISOU13663 | O   | ASPE | 60 | 9420    | 8520   | 7220   | -900  | 2930  | -140 | O0 |
| ATOM 13664  | CB  | ASPE | 60 | -13.844 | -5.369 | 0.071  | 1.00  | 61.40 | C0   |    |
| ANISOU13664 | CB  | ASPE | 60 | 8540    | 7960   | 6830   | -640  | 2580  | -130 | C0 |
| ATOM 13665  | CG  | ASPE | 60 | -14.988 | -5.713 | -0.873 | 1.00  | 61.66 | C0   |    |
| ANISOU13665 | CG  | ASPE | 60 | 8810    | 7950   | 6670   | -630  | 2510  | -150 | C0 |
| ATOM 13666  | OD1 | ASPE | 60 | -14.708 | -6.185 | -2.003 | 1.00  | 61.33 | O0   |    |
| ANISOU13666 | OD1 | ASPE | 60 | 8900    | 7880   | 6520   | -680  | 2660  | -200 | O0 |
| ATOM 13667  | OD2 | ASPE | 60 | -16.159 | -5.510 | -0.465 | 1.00  | 60.50 | O0   |    |
| ANISOU13667 | OD2 | ASPE | 60 | 8700    | 7800   | 6480   | -570  | 2300  | -110 | O0 |
| ATOM 13668  | H   | ASPE | 60 | -11.203 | -4.804 | 0.765  | 1.00  | 62.03 | H0   |    |
| ANISOU13668 | H   | ASPE | 60 | 8260    | 8140   | 7170   | -740  | 2850  | -150 | H0 |
| ATOM 13669  | HA  | ASPE | 60 | -12.560 | -6.871 | -0.523 | 1.00  | 62.94 | H0   |    |
| ANISOU13669 | HA  | ASPE | 60 | 8610    | 8180   | 7130   | -610  | 2870  | -240 | H0 |
| ATOM 13670  | HB2 | ASPE | 60 | -14.055 | -5.740 | 0.952  | 1.00  | 60.40 | H0   |    |
| ANISOU13670 | HB2 | ASPE | 60 | 8280    | 7860   | 6810   | -560  | 2490  | -130 | H0 |
| ATOM 13671  | HB3 | ASPE | 60 | -13.797 | -4.395 | 0.155  | 1.00  | 61.51 | H0   |    |
| ANISOU13671 | HB3 | ASPE | 60 | 8610    | 7960   | 6800   | -690  | 2540  | -90  | H0 |
| ATOM 13672  | N   | ARGE | 61 | -11.110 | -5.975 | -2.393 | 1.00  | 68.82 | N0   |    |
| ANISOU13672 | N   | ARGE | 61 | 9540    | 8910   | 7700   | -840  | 3240  | -280 | N0 |
| ATOM 13673  | CA  | ARGE | 61 | -10.328 | -5.454 | -3.548 | 1.00  | 72.27 | C0   |    |
| ANISOU13673 | CA  | ARGE | 61 | 10110   | 9340   | 8000   | -990  | 3470  | -300 | C0 |
| ATOM 13674  | C   | ARGE | 61 | -11.258 | -4.927 | -4.653 | 1.00  | 72.88 | C0   |    |
| ANISOU13674 | C   | ARGE | 61 | 10550   | 9340   | 7800   | -1070 | 3410  | -260 | C0 |
| ATOM 13675  | O   | ARGE | 61 | -10.771 | -4.155 | -5.502 | 1.00  | 73.95 | O0   |    |
| ANISOU13675 | O   | ARGE | 61 | 10850   | 9450   | 7800   | -1210 | 3550  | -250 | O0 |
| ATOM 13676  | CB  | ARGE | 61 | -9.383  | -6.538 | -4.081 | 1.00  | 75.14 | C0   |    |
| ANISOU13676 | CB  | ARGE | 61 | 10370   | 9740   | 8430   | -950  | 3720  | -400 | C0 |
| ATOM 13677  | CG  | ARGE | 61 | -8.283  | -6.937 | -3.106 | 1.00  | 76.53 | C0   |    |
| ANISOU13677 | CG  | ARGE | 61 | 10190   | 10020  | 8880   | -880  | 3800  | -420 | C0 |
| ATOM 13678  | CD  | ARGE | 61 | -6.968  | -7.245 | -3.798 | 1.00  | 80.24 | C0   |    |
| ANISOU13678 | CD  | ARGE | 61 | 10550   | 10550  | 9390   | -920  | 4110  | -500 | C0 |
| ATOM 13679  | NE  | ARGE | 61 | -7.116  | -8.279 | -4.817 | 1.00  | 82.91 | N0   |    |
| ANISOU13679 | NE  | ARGE | 61 | 11040   | 10840  | 9620   | -860  | 4260  | -600 | N0 |
| ATOM 13680  | CZ  | ARGE | 61 | -6.231  | -8.551 | -5.775 | 1.00  | 85.83 | C0   |    |
| ANISOU13680 | CZ  | ARGE | 61 | 11430   | 11240  | 9940   | -910  | 4560  | -680 | C0 |
| ATOM 13681  | NH1 | ARGE | 61 | -6.484  | -9.519 | -6.642 | 1.00  | 87.61 | N0   |    |
| ANISOU13681 | NH1 | ARGE | 61 | 11820   | 11400  | 10060  | -850  | 4670  | -770 | N0 |
| ATOM 13682  | NH2 | ARGE | 61 | -5.103  | -7.866 | -5.873 | 1.00  | 87.95 | N0   |    |
| ANISOU13682 | NH2 | ARGE | 61 | 11540   | 11610  | 10270  | -1030 | 4740  | -680 | N0 |
| ATOM 13683  | H   | ARGE | 61 | -10.958 | -6.857 | -2.224 | 1.00  | 68.70 | H0   |    |
| ANISOU13683 | H   | ARGE | 61 | 9430    | 8910   | 7770   | -760  | 3280  | -320 | H0 |
| ATOM 13684  | HA  | ARGE | 61 | -9.781  | -4.701 | -3.225 | 1.00  | 72.58 | H0   |    |
| ANISOU13684 | HA  | ARGE | 61 | 10080   | 9410   | 8090   | -1060 | 3490  | -260 | H0 |
| ATOM 13685  | HB2 | ARGE | 61 | -9.913  | -7.332 | -4.302 | 1.00  | 74.79 | H0   |    |
| ANISOU13685 | HB2 | ARGE | 61 | 10400   | 9670   | 8350   | -880  | 3690  | -440 | H0 |
| ATOM 13686  | HB3 | ARGE | 61 | -8.970  | -6.212 | -4.908 | 1.00  | 76.60 | H0   |    |
| ANISOU13686 | HB3 | ARGE | 61 | 10670   | 9930   | 8510   | -1050 | 3880  | -410 | H0 |
| ATOM 13687  | HG2 | ARGE | 61 | -8.140  | -6.208 | -2.464 | 1.00  | 75.96 | H0   |    |
| ANISOU13687 | HG2 | ARGE | 61 | 10020   | 9970   | 8860   | -920  | 3720  | -370 | H0 |



|                           |         |        |        |       |       |      |    |
|---------------------------|---------|--------|--------|-------|-------|------|----|
| ATOM 13688 HG3 ARG E 61   | -8.570  | -7.728 | -2.602 | 1.00  | 75.65 |      | H0 |
| ANISOU13688 HG3 ARG E 61  | 9990    | 9900   | 8850   | -750  | 3720  | -440 | H0 |
| ATOM 13689 HD2 ARG E 61   | -6.627  | -6.425 | -4.214 | 1.00  | 81.25 |      | H0 |
| ANISOU13689 HD2 ARG E 61  | 10740   | 10700  | 9440   | -1060 | 4190  | -480 | H0 |
| ATOM 13690 HD3 ARG E 61   | -6.313  | -7.540 | -3.130 | 1.00  | 80.47 |      | H0 |
| ANISOU13690 HD3 ARG E 61  | 10330   | 10650  | 9590   | -850  | 4140  | -520 | H0 |
| ATOM 13691 HE ARG E 61    | -7.842  | -8.762 | -4.796 | 1.00  | 81.80 |      | H0 |
| ANISOU13691 HE ARG E 61   | 11000   | 10640  | 9440   | -800  | 4160  | -600 | H0 |
| ATOM 13692 HH11 ARG E 61  | -7.231  | -9.978 | -6.582 | 1.00  | 86.26 |      | H0 |
| ANISOU13692 HH11 ARG E 61 | 11760   | 11170  | 9850   | -790  | 4550  | -780 | H0 |
| ATOM 13693 HH12 ARG E 61  | -5.904  | -9.702 | -7.276 | 1.00  | 88.96 |      | H0 |
| ANISOU13693 HH12 ARG E 61 | 12010   | 11600  | 10200  | -880  | 4870  | -830 | H0 |
| ATOM 13694 HH21 ARG E 61  | -4.924  | -7.221 | -5.302 | 1.00  | 87.26 |      | H0 |
| ANISOU13694 HH21 ARG E 61 | 11340   | 11570  | 10250  | -1080 | 4670  | -620 | H0 |
| ATOM 13695 HH22 ARG E 61  | -4.529  | -8.058 | -6.513 | 1.00  | 89.49 |      | H0 |
| ANISOU13695 HH22 ARG E 61 | 11740   | 11840  | 10430  | -1060 | 4950  | -740 | H0 |
| ATOM 13696 N THR E 62     | -12.544 | -5.300 | -4.640 | 1.00  | 71.71 |      | N0 |
| ANISOU13696 N THR E 62    | 10520   | 9150   | 7580   | -980  | 3200  | -250 | N0 |
| ATOM 13697 CA THR E 62    | -13.570 | -4.814 | -5.605 | 1.00  | 72.13 |      | C0 |
| ANISOU13697 CA THR E 62   | 10900   | 9140   | 7370   | -1030 | 3090  | -220 | C0 |
| ATOM 13698 C THR E 62     | -13.930 | -3.349 | -5.313 | 1.00  | 71.18 |      | C0 |
| ANISOU13698 C THR E 62    | 10880   | 8980   | 7190   | -1080 | 2940  | -110 | C0 |
| ATOM 13699 O THR E 62     | -14.633 | -2.754 | -6.151 | 1.00  | 72.25 |      | O0 |
| ANISOU13699 O THR E 62    | 11290   | 9060   | 7100   | -1120 | 2860  | -60  | O0 |
| ATOM 13700 CB THR E 62    | -14.838 | -5.680 | -5.589 | 1.00  | 71.48 |      | C0 |
| ANISOU13700 CB THR E 62   | 10870   | 9050   | 7240   | -930  | 2910  | -240 | C0 |
| ATOM 13701 OG1 THR E 62   | -15.465 | -5.531 | -4.315 | 1.00  | 69.87 |      | O0 |
| ANISOU13701 OG1 THR E 62  | 10490   | 8880   | 7180   | -820  | 2690  | -200 | O0 |
| ATOM 13702 CG2 THR E 62   | -14.565 | -7.142 | -5.871 | 1.00  | 71.97 |      | C0 |
| ANISOU13702 CG2 THR E 62  | 10870   | 9120   | 7350   | -880  | 3040  | -350 | C0 |
| ATOM 13703 H THR E 62     | -12.885 | -5.893 | -4.041 | 1.00  | 70.61 |      | H0 |
| ANISOU13703 H THR E 62    | 10270   | 9030   | 7530   | -890  | 3120  | -270 | H0 |
| ATOM 13704 HA THR E 62    | -13.177 | -4.861 | -6.507 | 1.00  | 73.57 |      | H0 |
| ANISOU13704 HA THR E 62   | 11210   | 9300   | 7440   | -1110 | 3250  | -250 | H0 |
| ATOM 13705 HB THR E 62    | -15.450 | -5.337 | -6.283 | 1.00  | 72.01 |      | H0 |
| ANISOU13705 HB THR E 62   | 11140   | 9090   | 7130   | -960  | 2840  | -220 | H0 |
| ATOM 13706 HG21 THR E 62  | -14.045 | -7.224 | -6.691 | 1.00  | 73.41 |      | H0 |
| ANISOU13706 HG21 THR E 62 | 11160   | 9280   | 7440   | -950  | 3210  | -390 | H0 |
| ATOM 13707 HG22 THR E 62  | -15.409 | -7.617 | -5.975 | 1.00  | 71.52 |      | H0 |
| ANISOU13707 HG22 THR E 62 | 10890   | 9050   | 7240   | -850  | 2930  | -370 | H0 |
| ATOM 13708 HG23 THR E 62  | -14.065 | -7.531 | -5.131 | 1.00  | 71.40 |      | H0 |
| ANISOU13708 HG23 THR E 62 | 10600   | 9070   | 7460   | -820  | 3090  | -370 | H0 |
| ATOM 13709 N LEU E 63     | -13.496 | -2.800 | -4.171 | 1.00  | 68.99 |      | N0 |
| ANISOU13709 N LEU E 63    | 10390   | 8730   | 7090   | -1060 | 2900  | -70  | N0 |
| ATOM 13710 CA LEU E 63    | -13.687 | -1.367 | -3.807 | 1.00  | 68.01 |      | C0 |
| ANISOU13710 CA LEU E 63   | 10370   | 8550   | 6920   | -1110 | 2770  | 20   | C0 |
| ATOM 13711 C LEU E 63     | -12.490 | -0.526 | -4.277 | 1.00  | 68.99 |      | C0 |
| ANISOU13711 C LEU E 63    | 10550   | 8650   | 7010   | -1290 | 2980  | 40   | C0 |
| ATOM 13712 O LEU E 63     | -12.641 | 0.706  | -4.330 | 1.00  | 69.34 |      | O0 |
| ANISOU13712 O LEU E 63    | 10770   | 8620   | 6960   | -1370 | 2910  | 120  | O0 |
| ATOM 13713 CB LEU E 63    | -13.882 | -1.249 | -2.291 | 1.00  | 65.75 |      | C0 |
| ANISOU13713 CB LEU E 63   | 9840    | 8310   | 6840   | -1010 | 2610  | 40   | C0 |
| ATOM 13714 CG LEU E 63    | -15.032 | -2.071 | -1.710 | 1.00  | 63.84 |      | C0 |
| ANISOU13714 CG LEU E 63   | 9520    | 8100   | 6640   | -850  | 2420  | 20   | C0 |

|                           |         |        |        |       |       |      |    |
|---------------------------|---------|--------|--------|-------|-------|------|----|
| ATOM 13715 CD1 LEU E 63   | -15.158 | -1.838 | -0.212 | 1.00  | 62.16 |      | C0 |
| ANISOU13715 CD1 LEU E 63  | 9090    | 7930   | 6600   | -760  | 2280  | 50   | C0 |
| ATOM 13716 CD2 LEU E 63   | -16.345 | -1.754 | -2.411 | 1.00  | 63.76 |      | C0 |
| ANISOU13716 CD2 LEU E 63  | 9750    | 8040   | 6430   | -810  | 2250  | 60   | C0 |
| ATOM 13717 H LEU E 63     | -13.069 | -3.280 | -3.527 | 1.00  | 68.52 |      | H0 |
| ANISOU13717 H LEU E 63    | 10130   | 8720   | 7180   | -1020 | 2930  | -100 | H0 |
| ATOM 13718 HA LEU E 63    | -14.494 | -1.037 | -4.264 | 1.00  | 68.04 |      | H0 |
| ANISOU13718 HA LEU E 63   | 10560   | 8510   | 6780   | -1090 | 2660  | 60   | H0 |
| ATOM 13719 HB2 LEU E 63   | -13.052 | -1.523 | -1.852 | 1.00  | 65.86 |      | H0 |
| ANISOU13719 HB2 LEU E 63  | 9670    | 8370   | 6990   | -1030 | 2720  | 10   | H0 |
| ATOM 13720 HB3 LEU E 63   | -14.033 | -0.308 | -2.073 | 1.00  | 65.85 |      | H0 |
| ANISOU13720 HB3 LEU E 63  | 9930    | 8270   | 6810   | -1040 | 2530  | 100  | H0 |
| ATOM 13721 HG LEU E 63    | -14.830 | -3.027 | -1.856 | 1.00  | 63.82 |      | H0 |
| ANISOU13721 HG LEU E 63   | 9430    | 8130   | 6680   | -820  | 2500  | -30  | H0 |
| ATOM 13722 HD11 LEU E 63  | -14.317 | -2.062 | 0.223  | 1.00  | 62.25 |      | H0 |
| ANISOU13722 HD11 LEU E 63 | 8940    | 7970   | 6740   | -790  | 2380  | 20   | H0 |
| ATOM 13723 HD12 LEU E 63  | -15.867 | -2.401 | 0.145  | 1.00  | 61.22 |      | H0 |
| ANISOU13723 HD12 LEU E 63 | 8910    | 7840   | 6510   | -670  | 2180  | 30   | H0 |
| ATOM 13724 HD13 LEU E 63  | -15.370 | -0.904 | -0.045 | 1.00  | 62.25 |      | H0 |
| ANISOU13724 HD13 LEU E 63 | 9190    | 7900   | 6570   | -780  | 2200  | 90   | H0 |
| ATOM 13725 HD21 LEU E 63  | -16.460 | -0.789 | -2.466 | 1.00  | 64.20 |      | H0 |
| ANISOU13725 HD21 LEU E 63 | 9930    | 8050   | 6420   | -830  | 2200  | 120  | H0 |
| ATOM 13726 HD22 LEU E 63  | -17.081 | -2.141 | -1.908 | 1.00  | 62.74 |      | H0 |
| ANISOU13726 HD22 LEU E 63 | 9550    | 7950   | 6340   | -710  | 2120  | 50   | H0 |
| ATOM 13727 HD23 LEU E 63  | -16.335 | -2.131 | -3.308 | 1.00  | 64.71 |      | H0 |
| ANISOU13727 HD23 LEU E 63 | 10000   | 8150   | 6440   | -850  | 2330  | 30   | H0 |
| ATOM 13728 N ALA E 64     | -11.360 | -1.161 | -4.611 | 1.00  | 69.34 |      | N0 |
| ANISOU13728 N ALA E 64    | 10460   | 8760   | 7130   | -1360 | 3230  | -30  | N0 |
| ATOM 13729 CA ALA E 64    | -10.104 | -0.505 | -5.051 | 1.00  | 71.07 |      | C0 |
| ANISOU13729 CA ALA E 64   | 10680   | 8990   | 7330   | -1560 | 3470  | -20  | C0 |
| ATOM 13730 C ALA E 64     | -10.403 | 0.523  | -6.148 | 1.00  | 72.01 |      | C0 |
| ANISOU13730 C ALA E 64    | 11180   | 9000   | 7180   | -1700 | 3490  | 50   | C0 |
| ATOM 13731 O ALA E 64     | -11.177 | 0.199  | -7.070 | 1.00  | 72.63 |      | O0 |
| ANISOU13731 O ALA E 64    | 11500   | 9030   | 7060   | -1660 | 3450  | 50   | O0 |
| ATOM 13732 CB ALA E 64    | -9.106  | -1.530 | -5.537 | 1.00  | 72.42 |      | C0 |
| ANISOU13732 CB ALA E 64   | 10690   | 9260   | 7570   | -1570 | 3740  | -120 | C0 |
| ATOM 13733 H ALA E 64     | -11.278 | -2.067 | -4.585 | 1.00  | 69.19 |      | H0 |
| ANISOU13733 H ALA E 64    | 10330   | 8790   | 7170   | -1290 | 3280  | -90  | H0 |
| ATOM 13734 HA ALA E 64    | -9.719  | -0.032 | -4.278 | 1.00  | 70.65 |      | H0 |
| ANISOU13734 HA ALA E 64   | 10480   | 8960   | 7400   | -1580 | 3440  | 0    | H0 |
| ATOM 13735 HB1 ALA E 64   | -8.270  | -1.089 | -5.760 | 1.00  | 73.83 |      | H0 |
| ANISOU13735 HB1 ALA E 64  | 10840   | 9460   | 7750   | -1700 | 3900  | -120 | H0 |
| ATOM 13736 HB2 ALA E 64   | -8.948  | -2.187 | -4.838 | 1.00  | 71.49 |      | H0 |
| ANISOU13736 HB2 ALA E 64  | 10340   | 9200   | 7620   | -1470 | 3720  | -160 | H0 |
| ATOM 13737 HB3 ALA E 64   | -9.456  | -1.976 | -6.326 | 1.00  | 72.89 |      | H0 |
| ANISOU13737 HB3 ALA E 64  | 10900   | 9290   | 7500   | -1560 | 3780  | -150 | H0 |
| ATOM 13738 N TRPE 65      | -9.821  | 1.719  | -6.025 | 1.00  | 72.38 |      | N0 |
| ANISOU13738 N TRPE 65     | 11290   | 9000   | 7210   | -1860 | 3540  | 110  | N0 |
| ATOM 13739 CA TRPE 65     | -9.843  | 2.796  | -7.049 | 1.00  | 74.09 |      | C0 |
| ANISOU13739 CA TRPE 65    | 11880   | 9100   | 7170   | -2030 | 3600  | 190  | C0 |
| ATOM 13740 C TRPE 65      | -8.423  | 3.348  | -7.213 | 1.00  | 76.21 |      | C0 |
| ANISOU13740 C TRPE 65     | 12070   | 9400   | 7480   | -2270 | 3860  | 180  | C0 |
| ATOM 13741 O TRPE 65      | -7.621  | 3.211  | -6.266 | 1.00  | 75.20 |      | O0 |
| ANISOU13741 O TRPE 65     | 11610   | 9380   | 7590   | -2290 | 3910  | 140  | O0 |

|                          |         |       |         |       |       |     |    |
|--------------------------|---------|-------|---------|-------|-------|-----|----|
| ATOM 13742 CB TRP E 65   | -10.855 | 3.887 | -6.671  | 1.00  | 73.02 |     | C0 |
| ANISOU13742 CB TRP E 65  | 11970   | 8820  | 6950    | -1980 | 3320  | 290 | C0 |
| ATOM 13743 CG TRP E 65   | -10.423 | 4.777 | -5.545  | 1.00  | 72.39 |     | C0 |
| ANISOU13743 CG TRP E 65  | 11760   | 8720  | 7020    | -2040 | 3260  | 330 | C0 |
| ATOM 13744 CD1 TRP E 65  | -9.715  | 5.938 | -5.647  | 1.00  | 73.84 |     | C0 |
| ANISOU13744 CD1 TRP E 65 | 12080   | 8820  | 7150    | -2250 | 3350  | 380 | C0 |
| ATOM 13745 CD2 TRP E 65  | -10.674 | 4.585 | -4.140  | 1.00  | 69.65 |     | C0 |
| ANISOU13745 CD2 TRP E 65 | 11140   | 8430  | 6900    | -1890 | 3080  | 300 | C0 |
| ATOM 13746 NE1 TRP E 65  | -9.504  | 6.479 | -4.408  | 1.00  | 72.86 |     | N0 |
| ANISOU13746 NE1 TRP E 65 | 11790   | 8690  | 7200    | -2250 | 3250  | 390 | N0 |
| ATOM 13747 CE2 TRP E 65  | -10.081 | 5.673 | -3.463  | 1.00  | 70.09 |     | C0 |
| ANISOU13747 CE2 TRP E 65 | 11180   | 8430  | 7020    | -2030 | 3080  | 340 | C0 |
| ATOM 13748 CE3 TRP E 65  | -11.341 | 3.609 | -3.388  | 1.00  | 67.20 |     | C0 |
| ANISOU13748 CE3 TRP E 65 | 10600   | 8200  | 6730    | -1670 | 2940  | 260 | C0 |
| ATOM 13749 CZ2 TRP E 65  | -10.139 | 5.808 | -2.075  | 1.00  | 68.50 |     | C0 |
| ANISOU13749 CZ2 TRP E 65 | 10750   | 8260  | 7010    | -1940 | 2930  | 330 | C0 |
| ATOM 13750 CZ3 TRP E 65  | -11.395 | 3.742 | -2.018  | 1.00  | 65.16 |     | C0 |
| ANISOU13750 CZ3 TRP E 65 | 10120   | 7980  | 6650    | -1590 | 2800  | 250 | C0 |
| ATOM 13751 CH2 TRP E 65  | -10.800 | 4.826 | -1.371  | 1.00  | 65.71 |     | C0 |
| ANISOU13751 CH2 TRP E 65 | 10190   | 8000  | 6780    | -1720 | 2790  | 280 | C0 |
| ATOM 13752 H TRP E 65    | -9.359  | 1.959 | -5.277  | 1.00  | 72.14 |     | H0 |
| ANISOU13752 H TRP E 65   | 11090   | 9010  | 7320    | -1880 | 3530  | 110 | H0 |
| ATOM 13753 HA TRP E 65   | -10.129 | 2.398 | -7.905  | 1.00  | 74.73 |     | H0 |
| ANISOU13753 HA TRP E 65  | 12120   | 9170  | 7110    | -2030 | 3640  | 170 | H0 |
| ATOM 13754 HB2 TRP E 65  | -11.023 | 4.437 | -7.464  | 1.00  | 74.39 |     | H0 |
| ANISOU13754 HB2 TRP E 65 | 12420   | 8910  | 6930    | -2060 | 3340  | 350 | H0 |
| ATOM 13755 HB3 TRP E 65  | -11.698 | 3.452 | -6.428  | 1.00  | 71.62 |     | H0 |
| ANISOU13755 HB3 TRP E 65 | 11770   | 8660  | 6780    | -1820 | 3160  | 290 | H0 |
| ATOM 13756 HD1 TRP E 65  | -9.405  | 6.317 | -6.454  | 1.00  | 75.58 |     | H0 |
| ANISOU13756 HD1 TRP E 65 | 12500   | 8990  | 7230    | -2390 | 3480  | 410 | H0 |
| ATOM 13757 HE1 TRP E 65  | -9.070  | 7.222 | -4.248  | 1.00  | 73.71 |     | H0 |
| ANISOU13757 HE1 TRP E 65 | 11950   | 8750  | 7310    | -2380 | 3280  | 420 | H0 |
| ATOM 13758 HE3 TRP E 65  | -11.745 | 2.874 | -3.815  | 1.00  | 66.80 |     | H0 |
| ANISOU13758 HE3 TRP E 65 | 10560   | 8180  | 6630    | -1590 | 2930  | 230 | H0 |
| ATOM 13759 HZ2 TRP E 65  | -9.737  | 6.539 | -1.639  | 1.00  | 68.97 |     | H0 |
| ANISOU13759 HZ2 TRP E 65 | 10820   | 8280  | 7100    | -2050 | 2930  | 350 | H0 |
| ATOM 13760 HZ3 TRP E 65  | -11.840 | 3.087 | -1.505  | 1.00  | 63.88 |     | H0 |
| ANISOU13760 HZ3 TRP E 65 | 9820    | 7870  | 6580    | -1460 | 2700  | 220 | H0 |
| ATOM 13761 HH2 TRP E 65  | -10.853 | 4.889 | -0.435  | 1.00  | 64.92 |     | H0 |
| ANISOU13761 HH2 TRP E 65 | 9940    | 7930  | 6800    | -1670 | 2690  | 270 | H0 |
| ATOM 13762 N ASN E 66    | -8.126  | 3.929 | -8.377  | 1.00  | 79.36 |     | N0 |
| ANISOU13762 N ASN E 66   | 12770   | 9730  | 7650    | -2460 | 4030  | 220 | N0 |
| ATOM 13763 CA ASN E 66   | -6.810  | 4.546 | -8.689  | 1.00  | 82.15 |     | C0 |
| ANISOU13763 CA ASN E 66  | 13100   | 10120 | 7990    | -2740 | 4310  | 220 | C0 |
| ATOM 13764 C ASN E 66    | -6.745  | 5.904 | -7.978  | 1.00  | 81.21 |     | C0 |
| ANISOU13764 C ASN E 66   | 13060   | 9890  | 7900    | -2860 | 4180  | 310 | C0 |
| ATOM 13765 O ASN E 66    | -7.612  | 6.757 | -8.251  | 1.00  | 80.61 |     | O0 |
| ANISOU13765 O ASN E 66   | 13350   | 9640  | 7640    | -2850 | 4010  | 410 | O0 |
| ATOM 13766 CB ASN E 66   | -6.585  | 4.635 | -10.202 | 1.00  | 86.25 |     | C0 |
| ANISOU13766 CB ASN E 66  | 13940   | 10600 | 8240    | -2900 | 4530  | 230 | C0 |
| ATOM 13767 CG ASN E 66   | -5.197  | 5.106 | -10.580 | 1.00  | 90.56 |     | C0 |
| ANISOU13767 CG ASN E 66  | 14420   | 11210 | 8780    | -3190 | 4860  | 210 | C0 |
| ATOM 13768 OD1 ASN E 66  | -4.569  | 5.860 | -9.839  | 1.00  | 91.49 |     | O0 |
| ANISOU13768 OD1 ASN E 66 | 14390   | 11340 | 9030    | -3320 | 4870  | 240 | O0 |

|                          |        |        |         |       |       |     |    |
|--------------------------|--------|--------|---------|-------|-------|-----|----|
| ATOM 13769 ND2 ASN E 66  | -4.714 | 4.668  | -11.734 | 1.00  | 95.26 |     | N0 |
| ANISOU13769 ND2 ASN E 66 | 15120  | 11860  | 9220    | -3290 | 5140  | 170 | N0 |
| ATOM 13770 H ASN E 66    | -8.725 | 3.983  | -9.061  | 1.00  | 79.60 |     | H0 |
| ANISOU13770 H ASN E 66   | 13050  | 9690   | 7500    | -2440 | 3980  | 250 | H0 |
| ATOM 13771 HA ASN E 66   | -6.105 | 3.965  | -8.319  | 1.00  | 82.11 |     | H0 |
| ANISOU13771 HA ASN E 66  | 12790  | 10240  | 8160    | -2730 | 4430  | 150 | H0 |
| ATOM 13772 HB2 ASN E 66  | -6.738 | 3.751  | -10.595 | 1.00  | 86.00 |     | H0 |
| ANISOU13772 HB2 ASN E 66 | 13860  | 10630  | 8190    | -2800 | 4590  | 170 | H0 |
| ATOM 13773 HB3 ASN E 66  | -7.244 | 5.251  | -10.582 | 1.00  | 86.49 |     | H0 |
| ANISOU13773 HB3 ASN E 66 | 14270  | 10500  | 8090    | -2910 | 4410  | 310 | H0 |
| ATOM 13774 N SER E 67    | -5.761 | 6.078  | -7.090  | 1.00  | 80.74 |     | N0 |
| ANISOU13774 N SER E 67   | 12680  | 9930   | 8070    | -2960 | 4260  | 270 | N0 |
| ATOM 13775 CA SER E 67   | -5.599 | 7.260  | -6.203  | 1.00  | 80.48 |     | C0 |
| ANISOU13775 CA SER E 67  | 12670  | 9810   | 8100    | -3080 | 4140  | 340 | C0 |
| ATOM 13776 C SER E 67    | -4.241 | 7.929  | -6.444  | 1.00  | 83.39 |     | C0 |
| ANISOU13776 C SER E 67   | 12980  | 10230  | 8480    | -3410 | 4400  | 330 | C0 |
| ATOM 13777 O SER E 67    | -3.616 | 8.372  | -5.459  | 1.00  | 83.03 |     | O0 |
| ANISOU13777 O SER E 67   | 12700  | 10240  | 8610    | -3510 | 4370  | 320 | O0 |
| ATOM 13778 CB SER E 67   | -5.767 | 6.863  | -4.759  | 1.00  | 78.00 |     | C0 |
| ANISOU13778 CB SER E 67  | 12010  | 9580   | 8040    | -2890 | 3940  | 290 | C0 |
| ATOM 13779 OG SER E 67   | -4.667 | 6.083  | -4.315  | 1.00  | 78.08 |     | O0 |
| ANISOU13779 OG SER E 67  | 11590  | 9800   | 8280    | -2920 | 4100  | 200 | O0 |
| ATOM 13780 H SER E 67    | -5.098 | 5.465  | -6.963  | 1.00  | 81.07 |     | H0 |
| ANISOU13780 H SER E 67   | 12460  | 10110  | 8230    | -2960 | 4390  | 200 | H0 |
| ATOM 13781 HA SER E 67   | -6.309 | 7.915  | -6.432  | 1.00  | 80.53 |     | H0 |
| ANISOU13781 HA SER E 67  | 12970  | 9670   | 7960    | -3060 | 4010  | 410 | H0 |
| ATOM 13782 HB2 SER E 67  | -5.841 | 7.673  | -4.204  | 1.00  | 77.89 |     | H0 |
| ANISOU13782 HB2 SER E 67 | 12060  | 9490   | 8040    | -2950 | 3830  | 340 | H0 |
| ATOM 13783 HB3 SER E 67  | -6.598 | 6.346  | -4.657  | 1.00  | 76.26 |     | H0 |
| ANISOU13783 HB3 SER E 67 | 11810  | 9350   | 7820    | -2690 | 3790  | 290 | H0 |
| ATOM 13784 N SER E 68    | -3.805 | 8.007  | -7.706  | 1.00  | 86.08 |     | N0 |
| ANISOU13784 N SER E 68   | 13520  | 10560  | 8620    | -3590 | 4650  | 340 | N0 |
| ATOM 13785 CA SER E 68   | -2.553 | 8.693  | -8.119  | 1.00  | 89.33 |     | C0 |
| ANISOU13785 CA SER E 68  | 13920  | 11020  | 9000    | -3950 | 4940  | 350 | C0 |
| ATOM 13786 C SER E 68    | -2.735 | 10.209 | -7.963  | 1.00  | 90.16 |     | C0 |
| ANISOU13786 C SER E 68   | 14380  | 10900  | 8980    | -4150 | 4830  | 460 | C0 |
| ATOM 13787 O SER E 68    | -1.786 | 10.870 | -7.495  | 1.00  | 91.53 |     | O0 |
| ANISOU13787 O SER E 68   | 14410  | 11110  | 9250    | -4400 | 4930  | 450 | O0 |
| ATOM 13788 CB SER E 68   | -2.138 | 8.307  | -9.525  | 1.00  | 92.02 |     | C0 |
| ANISOU13788 CB SER E 68  | 14410  | 11410  | 9150    | -4070 | 5240  | 320 | C0 |
| ATOM 13789 OG SER E 68   | -3.226 | 8.396  | -10.436 | 1.00  | 91.91 |     | O0 |
| ANISOU13789 OG SER E 68  | 14850  | 11220  | 8860    | -3970 | 5140  | 400 | O0 |
| ATOM 13790 H SER E 68    | -4.253 | 7.648  | -8.414  | 1.00  | 86.04 |     | H0 |
| ANISOU13790 H SER E 68   | 13680  | 10530  | 8480    | -3520 | 4670  | 350 | H0 |
| ATOM 13791 HA SER E 68   | -1.832 | 8.407  | -7.495  | 1.00  | 89.33 |     | H0 |
| ANISOU13791 HA SER E 68  | 13580  | 11160  | 9200    | -3970 | 5000  | 280 | H0 |
| ATOM 13792 HB2 SER E 68  | -1.413 | 8.901  | -9.825  | 1.00  | 94.25 |     | H0 |
| ANISOU13792 HB2 SER E 68 | 14740  | 11690  | 9380    | -4320 | 5420  | 340 | H0 |
| ATOM 13793 HB3 SER E 68  | -1.793 | 7.385  | -9.519  | 1.00  | 91.66 |     | H0 |
| ANISOU13793 HB3 SER E 68 | 14090  | 11510  | 9220    | -3970 | 5350  | 230 | H0 |
| ATOM 13794 N HIS E 69    | -3.919 | 10.722 | -8.326  | 1.00  | 89.13 |     | N0 |
| ANISOU13794 N HIS E 69   | 14680  | 10540  | 8640    | -4030 | 4620  | 560 | N0 |
| ATOM 13795 CA HIS E 69   | -4.307 | 12.158 | -8.246  | 1.00  | 89.84 |     | C0 |
| ANISOU13795 CA HIS E 69  | 15180  | 10370  | 8580    | -4160 | 4480  | 680 | C0 |

|                          |        |        |         |       |        |     |    |
|--------------------------|--------|--------|---------|-------|--------|-----|----|
| ATOM 13796 C HIS E 69    | -5.390 | 12.382 | -7.179  | 1.00  | 86.77  |     | C0 |
| ANISOU13796 C HIS E 69   | 14800  | 9880   | 8290    | -3880 | 4120   | 710 | C0 |
| ATOM 13797 O HIS E 69    | -5.569 | 13.547 | -6.772  | 1.00  | 87.86  |     | O0 |
| ANISOU13797 O HIS E 69   | 15190  | 9820   | 8380    | -3970 | 3990   | 780 | O0 |
| ATOM 13798 CB HIS E 69   | -4.763 | 12.653 | -9.627  | 1.00  | 92.14  |     | C0 |
| ANISOU13798 CB HIS E 69  | 16000  | 10480  | 8530    | -4240 | 4540   | 790 | C0 |
| ATOM 13799 CG HIS E 69   | -3.654 | 12.770 | -10.621 | 1.00  | 95.40  |     | C0 |
| ANISOU13799 CG HIS E 69  | 16470  | 10960  | 8810    | -4580 | 4900   | 780 | C0 |
| ATOM 13800 ND1 HIS E 69  | -3.422 | 11.808 | -11.589 | 1.00  | 96.17  |     | N0 |
| ANISOU13800 ND1 HIS E 69 | 16510  | 11210  | 8820    | -4560 | 5120   | 720 | N0 |
| ATOM 13801 CD2 HIS E 69  | -2.709 | 13.719 | -10.797 | 1.00  | 98.44  |     | C0 |
| ANISOU13801 CD2 HIS E 69 | 16970  | 11290  | 9140    | -4950 | 5100   | 820 | C0 |
| ATOM 13802 CE1 HIS E 69  | -2.385 | 12.163 | -12.321 | 1.00  | 99.39  |     | C0 |
| ANISOU13802 CE1 HIS E 69 | 16990  | 11650  | 9120    | -4900 | 5450   | 720 | C0 |
| ATOM 13803 NE2 HIS E 69  | -1.931 | 13.334 | -11.858 | 1.00  | 100.91 |     | N0 |
| ANISOU13803 NE2 HIS E 69 | 17280  | 11730  | 9330    | -5150 | 5440   | 790 | N0 |
| ATOM 13804 H HIS E 69    | -4.580 | 10.211 | -8.689  | 1.00  | 88.11  |     | H0 |
| ANISOU13804 H HIS E 69   | 14630  | 10400  | 8440    | -3850 | 4550   | 560 | H0 |
| ATOM 13805 HA HIS E 69   | -3.510 | 12.673 | -7.982  | 1.00  | 91.35  |     | H0 |
| ANISOU13805 HA HIS E 69  | 15290  | 10580  | 8830    | -4380 | 4590   | 680 | H0 |
| ATOM 13806 HB2 HIS E 69  | -5.441 | 12.034 | -9.979  | 1.00  | 90.89  |     | H0 |
| ANISOU13806 HB2 HIS E 69 | 15880  | 10340  | 8310    | -4040 | 4460   | 780 | H0 |
| ATOM 13807 HB3 HIS E 69  | -5.189 | 13.533 | -9.523  | 1.00  | 92.50  |     | H0 |
| ANISOU13807 HB3 HIS E 69 | 16330  | 10340  | 8480    | -4260 | 4400   | 870 | H0 |
| ATOM 13808 HD2 HIS E 69  | -2.605 | 14.503 | -10.292 | 1.00  | 98.89  |     | H0 |
| ANISOU13808 HD2 HIS E 69 | 17100  | 11240  | 9230    | -5050 | 5030   | 860 | H0 |
| ATOM 13809 HE1 HIS E 69  | -2.029 | 11.678 | -13.045 | 1.00  | 100.62 |     | H0 |
| ANISOU13809 HE1 HIS E 69 | 17130  | 11900  | 9200    | -4960 | 5650   | 680 | H0 |
| ATOM 13810 N SER E 70    | -6.074 | 11.318 | -6.739  | 1.00  | 83.32  |     | N0 |
| ANISOU13810 N SER E 70   | 14120  | 9560   | 7980    | -3570 | 3970   | 640 | N0 |
| ATOM 13811 CA SER E 70   | -7.261 | 11.368 | -5.843  | 1.00  | 80.15  |     | C0 |
| ANISOU13811 CA SER E 70  | 13730  | 9080   | 7640    | -3270 | 3630   | 660 | C0 |
| ATOM 13812 C SER E 70    | -6.847 | 11.196 | -4.384  | 1.00  | 77.74  |     | C0 |
| ANISOU13812 C SER E 70   | 13020  | 8890   | 7620    | -3230 | 3550   | 590 | C0 |
| ATOM 13813 O SER E 70    | -5.724 | 10.782 | -4.096  | 1.00  | 77.71  |     | O0 |
| ANISOU13813 O SER E 70   | 12680  | 9060   | 7780    | -3380 | 3730   | 510 | O0 |
| ATOM 13814 CB SER E 70   | -8.275 | 10.316 | -6.234  | 1.00  | 78.42  |     | C0 |
| ANISOU13814 CB SER E 70  | 13500  | 8920   | 7380    | -2980 | 3520   | 640 | C0 |
| ATOM 13815 OG SER E 70   | -8.955 | 10.672 | -7.426  | 1.00  | 79.78  |     | O0 |
| ANISOU13815 OG SER E 70  | 14100  | 8940   | 7270    | -2980 | 3500   | 730 | O0 |
| ATOM 13816 H SER E 70    | -5.848 | 10.464 | -6.953  | 1.00  | 82.93  |     | H0 |
| ANISOU13816 H SER E 70   | 13880  | 9650   | 7980    | -3510 | 4070   | 580 | H0 |
| ATOM 13817 HA SER E 70   | -7.683 | 12.262 | -5.946  | 1.00  | 80.88  |     | H0 |
| ANISOU13817 HA SER E 70  | 14130  | 8990   | 7610    | -3300 | 3530   | 740 | H0 |
| ATOM 13818 HB2 SER E 70  | -7.819 | 9.456  | -6.364  | 1.00  | 78.13  |     | H0 |
| ANISOU13818 HB2 SER E 70 | 13230  | 9030   | 7420    | -2980 | 3650   | 570 | H0 |
| ATOM 13819 HB3 SER E 70  | -8.927 | 10.206 | -5.507  | 1.00  | 76.57  |     | H0 |
| ANISOU13819 HB3 SER E 70 | 13180  | 8680   | 7230    | -2800 | 3330   | 630 | H0 |
| ATOM 13820 N PRO E 71    | -7.744 | 11.519 | -3.420  | 1.00  | 75.61  |     | N0 |
| ANISOU13820 N PRO E 71   | 12780  | 8530   | 7420    | -3030 | 3280   | 600 | N0 |
| ATOM 13821 CA PRO E 71   | -7.587 | 11.086 | -2.030  | 1.00  | 72.97  |     | C0 |
| ANISOU13821 CA PRO E 71  | 12060  | 8330   | 7340    | -2920 | 3170   | 530 | C0 |
| ATOM 13822 C PRO E 71    | -7.526 | 9.554  | -1.942  | 1.00  | 70.36  |     | C0 |
| ANISOU13822 C PRO E 71   | 11350  | 8230   | 7150    | -2750 | 3220   | 440 | C0 |

|                          |         |        |        |       |       |     |    |
|--------------------------|---------|--------|--------|-------|-------|-----|----|
| ATOM 13823 O PRO E 71    | -8.346  | 8.915  | -2.571 | 1.00  | 69.12 |     | O0 |
| ANISOU13823 O PRO E 71   | 11290   | 8070   | 6900   | -2570 | 3170  | 450 | O0 |
| ATOM 13824 CB PRO E 71   | -8.849  | 11.615 | -1.329 | 1.00  | 71.78 |     | C0 |
| ANISOU13824 CB PRO E 71  | 12080   | 8030   | 7160   | -2690 | 2870  | 570 | C0 |
| ATOM 13825 CG PRO E 71   | -9.306  | 12.766 | -2.200 | 1.00  | 73.82 |     | C0 |
| ANISOU13825 CG PRO E 71  | 12850   | 8040   | 7170   | -2770 | 2850  | 680 | C0 |
| ATOM 13826 CD PRO E 71   | -8.946  | 12.346 | -3.609 | 1.00  | 75.62 |     | C0 |
| ANISOU13826 CD PRO E 71  | 13190   | 8300   | 7240   | -2890 | 3060  | 700 | C0 |
| ATOM 13827 HA PRO E 71   | -6.778  | 11.497 | -1.634 | 1.00  | 74.03 |     | H0 |
| ANISOU13827 HA PRO E 71  | 12090   | 8490   | 7550   | -3100 | 3240  | 510 | H0 |
| ATOM 13828 HB2 PRO E 71  | -9.541  | 10.921 | -1.277 | 1.00  | 70.08 |     | H0 |
| ANISOU13828 HB2 PRO E 71 | 11790   | 7870   | 6960   | -2480 | 2780  | 550 | H0 |
| ATOM 13829 HB3 PRO E 71  | -8.643  | 11.925 | -0.422 | 1.00  | 71.33 |     | H0 |
| ANISOU13829 HB3 PRO E 71 | 11910   | 7980   | 7210   | -2710 | 2800  | 550 | H0 |
| ATOM 13830 HG2 PRO E 71  | -10.271 | 12.905 | -2.116 | 1.00  | 73.05 |     | H0 |
| ANISOU13830 HG2 PRO E 71 | 12890   | 7850   | 7010   | -2580 | 2670  | 710 | H0 |
| ATOM 13831 HG3 PRO E 71  | -8.844  | 13.593 | -1.955 | 1.00  | 75.19 |     | H0 |
| ANISOU13831 HG3 PRO E 71 | 13120   | 8110   | 7330   | -2940 | 2870  | 690 | H0 |
| ATOM 13832 HD2 PRO E 71  | -9.666  | 11.830 | -4.017 | 1.00  | 74.64 |     | H0 |
| ANISOU13832 HD2 PRO E 71 | 13110   | 8200   | 7050   | -2720 | 2990  | 700 | H0 |
| ATOM 13833 HD3 PRO E 71  | -8.755  | 13.122 | -4.167 | 1.00  | 77.46 |     | H0 |
| ANISOU13833 HD3 PRO E 71 | 13700   | 8400   | 7330   | -3050 | 3120  | 760 | H0 |
| ATOM 13834 N ASPE 72     | -6.569  | 9.012  | -1.183 | 1.00  | 69.49 |     | N0 |
| ANISOU13834 N ASPE 72    | 10840   | 8310   | 7260   | -2800 | 3300  | 370 | N0 |
| ATOM 13835 CA ASPE 72    | -6.285  | 7.550  | -1.139 | 1.00  | 68.36 |     | C0 |
| ANISOU13835 CA ASPE 72   | 10340   | 8370   | 7270   | -2660 | 3380  | 290 | C0 |
| ATOM 13836 C ASPE 72     | -7.082  | 6.882  | -0.008 | 1.00  | 64.64 |     | C0 |
| ANISOU13836 C ASPE 72    | 9670    | 7950   | 6940   | -2390 | 3150  | 260 | C0 |
| ATOM 13837 O ASPE 72     | -7.079  | 5.637  | 0.036  | 1.00  | 63.58 |     | O0 |
| ANISOU13837 O ASPE 72    | 9300    | 7960   | 6910   | -2230 | 3180  | 200 | O0 |
| ATOM 13838 CB ASPE 72    | -4.781  | 7.255  | -1.059 | 1.00  | 70.76 |     | C0 |
| ANISOU13838 CB ASPE 72   | 10300   | 8860   | 7720   | -2860 | 3620  | 220 | C0 |
| ATOM 13839 CG ASPE 72    | -3.987  | 8.132  | -0.106 | 1.00  | 71.98 |     | C0 |
| ANISOU13839 CG ASPE 72   | 10320   | 9030   | 7990   | -3050 | 3590  | 220 | C0 |
| ATOM 13840 OD1 ASPE 72   | -4.038  | 7.870  | 1.111  | 1.00  | 70.80 |     | O0 |
| ANISOU13840 OD1 ASPE 72  | 9930    | 8960   | 8010   | -2930 | 3420  | 190 | O0 |
| ATOM 13841 OD2 ASPE 72   | -3.312  | 9.062  | -0.597 | 1.00  | 74.89 |     | O0 |
| ANISOU13841 OD2 ASPE 72  | 10840   | 9340   | 8270   | -3340 | 3730  | 250 | O0 |
| ATOM 13842 H ASPE 72     | -6.041  | 9.510  | -0.634 | 1.00  | 70.26 |     | H0 |
| ANISOU13842 H ASPE 72    | 10860   | 8410   | 7430   | -2930 | 3300  | 360 | H0 |
| ATOM 13843 HA ASPE 72    | -6.602  | 7.166  | -1.989 | 1.00  | 68.49 |     | H0 |
| ANISOU13843 HA ASPE 72   | 10480   | 8370   | 7170   | -2620 | 3450  | 290 | H0 |
| ATOM 13844 HB2 ASPE 72   | -4.657  | 6.324  | -0.783 | 1.00  | 69.72 |     | H0 |
| ANISOU13844 HB2 ASPE 72  | 9920    | 8860   | 7710   | -2720 | 3630  | 170 | H0 |
| ATOM 13845 HB3 ASPE 72   | -4.396  | 7.358  | -1.953 | 1.00  | 72.30 |     | H0 |
| ANISOU13845 HB3 ASPE 72  | 10610   | 9050   | 7810   | -2990 | 3790  | 230 | H0 |
| ATOM 13846 N GLNE 73     | -7.758  | 7.665  | 0.843  | 1.00  | 62.53 |     | N0 |
| ANISOU13846 N GLNE 73    | 9520    | 7570   | 6670   | -2330 | 2930  | 300 | N0 |
| ATOM 13847 CA GLNE 73    | -8.631  | 7.158  | 1.936  | 1.00  | 59.41 |     | C0 |
| ANISOU13847 CA GLNE 73   | 8980    | 7220   | 6380   | -2070 | 2700  | 280 | C0 |
| ATOM 13848 C GLNE 73     | -9.933  | 7.962  | 1.981  | 1.00  | 57.74 |     | C0 |
| ANISOU13848 C GLNE 73    | 9090    | 6820   | 6020   | -1950 | 2500  | 340 | C0 |
| ATOM 13849 O GLNE 73     | -9.901  | 9.164  | 1.668  | 1.00  | 59.10 |     | O0 |
| ANISOU13849 O GLNE 73    | 9550    | 6830   | 6070   | -2080 | 2500  | 390 | O0 |

|                           |         |       |        |       |       |     |    |
|---------------------------|---------|-------|--------|-------|-------|-----|----|
| ATOM 13850 CB GLN E 73    | -7.929  | 7.255 | 3.290  | 1.00  | 59.40 |     | C0 |
| ANISOU13850 CB GLN E 73   | 8690    | 7310  | 6570   | -2120 | 2640  | 240 | C0 |
| ATOM 13851 CG GLN E 73    | -6.629  | 6.467 | 3.366  | 1.00  | 60.51 |     | C0 |
| ANISOU13851 CG GLN E 73   | 8460    | 7650  | 6880   | -2220 | 2820  | 180 | C0 |
| ATOM 13852 CD GLN E 73    | -6.146  | 6.297 | 4.785  | 1.00  | 59.83 |     | C0 |
| ANISOU13852 CD GLN E 73   | 8060    | 7690  | 6990   | -2190 | 2710  | 140 | C0 |
| ATOM 13853 OE1 GLN E 73   | -6.933  | 6.187 | 5.721  | 1.00  | 57.87 |     | O0 |
| ANISOU13853 OE1 GLN E 73  | 7800    | 7420  | 6770   | -2020 | 2510  | 140 | O0 |
| ATOM 13854 NE2 GLN E 73   | -4.835  | 6.271 | 4.954  | 1.00  | 61.87 |     | N0 |
| ANISOU13854 NE2 GLN E 73  | 8060    | 8080  | 7370   | -2370 | 2840  | 100 | N0 |
| ATOM 13855 H GLN E 73     | -7.716  | 8.573 | 0.809  | 1.00  | 63.64 |     | H0 |
| ANISOU13855 H GLN E 73    | 9840    | 7600  | 6730   | -2440 | 2910  | 330 | H0 |
| ATOM 13856 HA GLN E 73    | -8.846  | 6.215 | 1.755  | 1.00  | 58.48 |     | H0 |
| ANISOU13856 HA GLN E 73   | 8740    | 7180  | 6300   | -1950 | 2720  | 250 | H0 |
| ATOM 13857 HB2 GLN E 73   | -7.742  | 8.199 | 3.476  | 1.00  | 60.35 |     | H0 |
| ANISOU13857 HB2 GLN E 73  | 8940    | 7340  | 6650   | -2250 | 2620  | 260 | H0 |
| ATOM 13858 HB3 GLN E 73   | -8.543  | 6.930 | 3.980  | 1.00  | 57.82 |     | H0 |
| ANISOU13858 HB3 GLN E 73  | 8410    | 7130  | 6430   | -1960 | 2500  | 230 | H0 |
| ATOM 13859 HG2 GLN E 73   | -6.764  | 5.582 | 2.964  | 1.00  | 59.88 |     | H0 |
| ANISOU13859 HG2 GLN E 73  | 8310    | 7640  | 6810   | -2110 | 2870  | 160 | H0 |
| ATOM 13860 HG3 GLN E 73   | -5.939  | 6.932 | 2.845  | 1.00  | 62.20 |     | H0 |
| ANISOU13860 HG3 GLN E 73  | 8730    | 7860  | 7050   | -2410 | 2960  | 180 | H0 |
| ATOM 13861 HE21 GLN E 73  | -4.479  | 6.589 | 5.698  | 1.00  | 62.00 |     | H0 |
| ANISOU13861 HE21 GLN E 73 | 7970    | 8130  | 7450   | -2430 | 2780  | 90  | H0 |
| ATOM 13862 HE22 GLN E 73  | -4.314  | 5.935 | 4.324  | 1.00  | 62.74 |     | H0 |
| ANISOU13862 HE22 GLN E 73 | 8100    | 8250  | 7480   | -2430 | 3000  | 90  | H0 |
| ATOM 13863 N VAL E 74     | -11.034 | 7.311 | 2.364  | 1.00  | 54.87 |     | N0 |
| ANISOU13863 N VAL E 74    | 8680    | 6490  | 5680   | -1700 | 2330  | 330 | N0 |
| ATOM 13864 CA VAL E 74    | -12.352 | 7.962 | 2.623  | 1.00  | 53.43 |     | C0 |
| ANISOU13864 CA VAL E 74   | 8730    | 6180  | 5400   | -1530 | 2110  | 370 | C0 |
| ATOM 13865 C VAL E 74     | -13.018 | 7.257 | 3.804  | 1.00  | 51.11 |     | C0 |
| ANISOU13865 C VAL E 74    | 8190    | 5990  | 5240   | -1320 | 1950  | 330 | C0 |
| ATOM 13866 O VAL E 74     | -12.711 | 6.074 | 4.042  | 1.00  | 49.84 |     | O0 |
| ANISOU13866 O VAL E 74    | 7750    | 5980  | 5200   | -1270 | 2010  | 280 | O0 |
| ATOM 13867 CB VAL E 74    | -13.264 | 7.946 | 1.382  | 1.00  | 53.77 |     | C0 |
| ANISOU13867 CB VAL E 74   | 9050    | 6140  | 5250   | -1440 | 2090  | 420 | C0 |
| ATOM 13868 CG1 VAL E 74   | -12.701 | 8.814 | 0.262  | 1.00  | 56.08 |     | C0 |
| ANISOU13868 CG1 VAL E 74  | 9650    | 6290  | 5370   | -1650 | 2230  | 480 | C0 |
| ATOM 13869 CG2 VAL E 74   | -13.532 | 6.532 | 0.889  | 1.00  | 52.54 |     | C0 |
| ANISOU13869 CG2 VAL E 74  | 8730    | 6120  | 5110   | -1340 | 2130  | 380 | C0 |
| ATOM 13870 H VAL E 74     | -11.047 | 6.408 | 2.490  | 1.00  | 53.97 |     | H0 |
| ANISOU13870 H VAL E 74    | 8380    | 6480  | 5650   | -1610 | 2340  | 290 | H0 |
| ATOM 13871 HA VAL E 74    | -12.191 | 8.887 | 2.873  | 1.00  | 54.46 |     | H0 |
| ANISOU13871 HA VAL E 74   | 8990    | 6200  | 5500   | -1610 | 2090  | 390 | H0 |
| ATOM 13872 HB VAL E 74    | -14.131 | 8.336 | 1.653  | 1.00  | 53.27 |     | H0 |
| ANISOU13872 HB VAL E 74   | 9100    | 6000  | 5140   | -1310 | 1930  | 450 | H0 |
| ATOM 13873 HG11 VAL E 74  | -12.465 | 9.689 | 0.615  | 1.00  | 56.89 |     | H0 |
| ANISOU13873 HG11 VAL E 74 | 9850    | 6300  | 5470   | -1730 | 2200  | 500 | H0 |
| ATOM 13874 HG12 VAL E 74  | -13.370 | 8.917 | -0.437 | 1.00  | 56.45 |     | H0 |
| ANISOU13874 HG12 VAL E 74 | 9900    | 6270  | 5280   | -1580 | 2170  | 520 | H0 |
| ATOM 13875 HG13 VAL E 74  | -11.908 | 8.390 | -0.110 | 1.00  | 56.70 |     | H0 |
| ANISOU13875 HG13 VAL E 74 | 9620    | 6450  | 5480   | -1770 | 2390  | 450 | H0 |
| ATOM 13876 HG21 VAL E 74  | -12.688 | 6.066 | 0.760  | 1.00  | 52.95 |     | H0 |
| ANISOU13876 HG21 VAL E 74 | 8640    | 6250  | 5230   | -1440 | 2280  | 350 | H0 |

|                           |         |       |       |       |       |     |    |
|---------------------------|---------|-------|-------|-------|-------|-----|----|
| ATOM 13877 HG22 VAL E 74  | -14.013 | 6.569 | 0.044 | 1.00  | 53.13 |     | H0 |
| ANISOU13877 HG22 VAL E 74 | 8990    | 6150  | 5050  | -1310 | 2120  | 410 | H0 |
| ATOM 13878 HG23 VAL E 74  | -14.068 | 6.053 | 1.545 | 1.00  | 51.17 |     | H0 |
| ANISOU13878 HG23 VAL E 74 | 8410    | 6010  | 5020  | -1200 | 2020  | 360 | H0 |
| ATOM 13879 N SER E 75     | -13.881 | 7.983 | 4.513 | 1.00  | 50.42 |     | N0 |
| ANISOU13879 N SER E 75    | 8220    | 5810  | 5130  | -1200 | 1770  | 350 | N0 |
| ATOM 13880 CA SER E 75    | -14.777 | 7.461 | 5.571 | 1.00  | 48.48 |     | C0 |
| ANISOU13880 CA SER E 75   | 7800    | 5650  | 4970  | -980  | 1610  | 310 | C0 |
| ATOM 13881 C SER E 75     | -16.106 | 7.081 | 4.918 | 1.00  | 48.04 |     | C0 |
| ANISOU13881 C SER E 75    | 7860    | 5590  | 4800  | -790  | 1510  | 340 | C0 |
| ATOM 13882 O SER E 75     | -16.642 | 7.894 | 4.142 | 1.00  | 48.99 |     | O0 |
| ANISOU13882 O SER E 75    | 8270    | 5570  | 4770  | -770  | 1470  | 390 | O0 |
| ATOM 13883 CB SER E 75    | -14.951 | 8.461 | 6.681 | 1.00  | 48.54 |     | C0 |
| ANISOU13883 CB SER E 75   | 7870    | 5570  | 5000  | -960  | 1490  | 310 | C0 |
| ATOM 13884 OG SER E 75    | -13.715 | 8.694 | 7.345 | 1.00  | 48.88 |     | O0 |
| ANISOU13884 OG SER E 75   | 7770    | 5650  | 5150  | -1150 | 1570  | 280 | O0 |
| ATOM 13885 H SER E 75     | -13.986 | 8.880 | 4.390 | 1.00  | 51.40 |     | H0 |
| ANISOU13885 H SER E 75    | 8550    | 5810  | 5170  | -1240 | 1740  | 380 | H0 |
| ATOM 13886 HA SER E 75    | -14.364 | 6.641 | 5.947 | 1.00  | 47.76 |     | H0 |
| ANISOU13886 HA SER E 75   | 7480    | 5680  | 4990  | -990  | 1660  | 280 | H0 |
| ATOM 13887 HB2 SER E 75   | -15.290 | 9.307 | 6.311 | 1.00  | 49.43 |     | H0 |
| ANISOU13887 HB2 SER E 75  | 8220    | 5550  | 5010  | -960  | 1460  | 340 | H0 |
| ATOM 13888 HB3 SER E 75   | -15.611 | 8.122 | 7.327 | 1.00  | 47.34 |     | H0 |
| ANISOU13888 HB3 SER E 75  | 7620    | 5480  | 4890  | -820  | 1390  | 280 | H0 |
| ATOM 13889 N VAL E 76     | -16.585 | 5.868 | 5.194 | 1.00  | 46.93 |     | N0 |
| ANISOU13889 N VAL E 76    | 7500    | 5590  | 4740  | -670  | 1480  | 300 | N0 |
| ATOM 13890 CA VAL E 76    | -17.816 | 5.285 | 4.588 | 1.00  | 46.76 |     | C0 |
| ANISOU13890 CA VAL E 76   | 7530    | 5610  | 4630  | -510  | 1390  | 310 | C0 |
| ATOM 13891 C VAL E 76     | -18.672 | 4.706 | 5.709 | 1.00  | 45.44 |     | C0 |
| ANISOU13891 C VAL E 76    | 7150    | 5550  | 4560  | -340  | 1250  | 270 | C0 |
| ATOM 13892 O VAL E 76     | -18.148 | 4.044 | 6.601 | 1.00  | 44.12 |     | O0 |
| ANISOU13892 O VAL E 76    | 6750    | 5480  | 4540  | -360  | 1290  | 240 | O0 |
| ATOM 13893 CB VAL E 76    | -17.462 | 4.214 | 3.540 | 1.00  | 46.56 |     | C0 |
| ANISOU13893 CB VAL E 76   | 7460    | 5650  | 4580  | -570  | 1520  | 290 | C0 |
| ATOM 13894 CG1 VAL E 76   | -18.702 | 3.657 | 2.861 | 1.00  | 46.20 |     | C0 |
| ANISOU13894 CG1 VAL E 76  | 7490    | 5640  | 4430  | -440  | 1410  | 300 | C0 |
| ATOM 13895 CG2 VAL E 76   | -16.482 | 4.748 | 2.506 | 1.00  | 48.70 |     | C0 |
| ANISOU13895 CG2 VAL E 76  | 7910    | 5830  | 4760  | -760  | 1680  | 320 | C0 |
| ATOM 13896 H VAL E 76     | -16.176 | 5.306 | 5.784 | 1.00  | 46.22 |     | H0 |
| ANISOU13896 H VAL E 76    | 7210    | 5590  | 4760  | -680  | 1510  | 270 | H0 |
| ATOM 13897 HA VAL E 76    | -18.310 | 5.997 | 4.149 | 1.00  | 47.47 |     | H0 |
| ANISOU13897 HA VAL E 76   | 7820    | 5610  | 4610  | -470  | 1320  | 350 | H0 |
| ATOM 13898 HB VAL E 76    | -17.020 | 3.468 | 4.017 | 1.00  | 45.95 |     | H0 |
| ANISOU13898 HB VAL E 76   | 7180    | 5660  | 4620  | -580  | 1570  | 260 | H0 |
| ATOM 13899 HG11 VAL E 76  | -19.221 | 3.139 | 3.500 | 1.00  | 45.17 |     | H0 |
| ANISOU13899 HG11 VAL E 76 | 7210    | 5590  | 4370  | -340  | 1340  | 270 | H0 |
| ATOM 13900 HG12 VAL E 76  | -18.438 | 3.083 | 2.121 | 1.00  | 46.56 |     | H0 |
| ANISOU13900 HG12 VAL E 76 | 7550    | 5700  | 4440  | -490  | 1500  | 290 | H0 |
| ATOM 13901 HG13 VAL E 76  | -19.244 | 4.391 | 2.523 | 1.00  | 46.93 |     | H0 |
| ANISOU13901 HG13 VAL E 76 | 7760    | 5650  | 4420  | -390  | 1330  | 340 | H0 |
| ATOM 13902 HG21 VAL E 76  | -16.820 | 5.584 | 2.140 | 1.00  | 49.44 |     | H0 |
| ANISOU13902 HG21 VAL E 76 | 8220    | 5820  | 4740  | -760  | 1630  | 360 | H0 |
| ATOM 13903 HG22 VAL E 76  | -16.378 | 4.099 | 1.789 | 1.00  | 48.78 |     | H0 |
| ANISOU13903 HG22 VAL E 76 | 7920    | 5880  | 4730  | -780  | 1760  | 310 | H0 |



|                           |         |        |        |      |       |     |    |
|---------------------------|---------|--------|--------|------|-------|-----|----|
| ATOM 13904 HG23 VAL E 76  | -15.619 | 4.905  | 2.927  | 1.00 | 48.79 |     | H0 |
| ANISOU13904 HG23 VAL E 76 | 7830    | 5850   | 4860   | -860 | 1760  | 310 | H0 |
| ATOM 13905 N PRO E 77     | -20.007 | 4.921  | 5.692  | 1.00 | 46.46 |     | N0 |
| ANISOU13905 N PRO E 77    | 7360    | 5680   | 4610   | -170 | 1100  | 290 | N0 |
| ATOM 13906 CA PRO E 77    | -20.901 | 4.256  | 6.643  | 1.00 | 45.80 |     | C0 |
| ANISOU13906 CA PRO E 77   | 7070    | 5720   | 4610   | -20  | 1000  | 250 | C0 |
| ATOM 13907 C PRO E 77     | -20.814 | 2.734  | 6.458  | 1.00 | 45.14 |     | C0 |
| ANISOU13907 C PRO E 77    | 6800    | 5760   | 4590   | -50  | 1060  | 220 | C0 |
| ATOM 13908 O PRO E 77     | -20.867 | 2.306  | 5.333  | 1.00 | 44.84 |     | O0 |
| ANISOU13908 O PRO E 77    | 6850    | 5720   | 4470   | -90  | 1110  | 230 | O0 |
| ATOM 13909 CB PRO E 77    | -22.312 | 4.763  | 6.291  | 1.00 | 46.30 |     | C0 |
| ANISOU13909 CB PRO E 77   | 7270    | 5770   | 4560   | 150  | 840   | 270 | C0 |
| ATOM 13910 CG PRO E 77    | -22.095 | 5.967  | 5.388  | 1.00 | 47.89 |     | C0 |
| ANISOU13910 CG PRO E 77   | 7780    | 5790   | 4620   | 110  | 840   | 330 | C0 |
| ATOM 13911 CD PRO E 77    | -20.731 | 5.791  | 4.750  | 1.00 | 47.78 |     | C0 |
| ANISOU13911 CD PRO E 77   | 7810    | 5730   | 4610   | -110 | 1020  | 340 | C0 |
| ATOM 13912 HA PRO E 77    | -20.665 | 4.513  | 7.569  | 1.00 | 45.37 |     | H0 |
| ANISOU13912 HA PRO E 77   | 6940    | 5670   | 4630   | -20  | 980   | 230 | H0 |
| ATOM 13913 HB2 PRO E 77   | -22.826 | 4.070  | 5.825  | 1.00 | 46.08 |     | H0 |
| ANISOU13913 HB2 PRO E 77  | 7200    | 5810   | 4500   | 180  | 820   | 270 | H0 |
| ATOM 13914 HB3 PRO E 77   | -22.799 | 5.024  | 7.101  | 1.00 | 46.00 |     | H0 |
| ANISOU13914 HB3 PRO E 77  | 7170    | 5750   | 4550   | 240  | 760   | 260 | H0 |
| ATOM 13915 HG2 PRO E 77   | -22.791 | 6.009  | 4.701  | 1.00 | 48.39 |     | H0 |
| ANISOU13915 HG2 PRO E 77  | 7940    | 5850   | 4590   | 180  | 770   | 350 | H0 |
| ATOM 13916 HG3 PRO E 77   | -22.124 | 6.795  | 5.910  | 1.00 | 48.18 |     | H0 |
| ANISOU13916 HG3 PRO E 77  | 7890    | 5750   | 4660   | 150  | 800   | 330 | H0 |
| ATOM 13917 HD2 PRO E 77   | -20.806 | 5.371  | 3.874  | 1.00 | 48.22 |     | H0 |
| ANISOU13917 HD2 PRO E 77  | 7920    | 5800   | 4600   | -130 | 1050  | 350 | H0 |
| ATOM 13918 HD3 PRO E 77   | -20.281 | 6.651  | 4.652  | 1.00 | 48.82 |     | H0 |
| ANISOU13918 HD3 PRO E 77  | 8090    | 5750   | 4710   | -170 | 1050  | 360 | H0 |
| ATOM 13919 N ILE E 78     | -20.663 | 1.966  | 7.541  | 1.00 | 44.96 |     | N0 |
| ANISOU13919 N ILE E 78    | 6540    | 5840   | 4700   | -30  | 1070  | 190 | N0 |
| ATOM 13920 CA ILE E 78    | -20.510 | 0.480  | 7.467  | 1.00 | 45.71 |     | C0 |
| ANISOU13920 CA ILE E 78   | 6470    | 6030   | 4870   | -50  | 1130  | 160 | C0 |
| ATOM 13921 C ILE E 78     | -21.738 | -0.137 | 6.789  | 1.00 | 46.20 |     | C0 |
| ANISOU13921 C ILE E 78    | 6560    | 6150   | 4840   | 20   | 1050  | 150 | C0 |
| ATOM 13922 O ILE E 78     | -21.584 | -1.202 | 6.175  | 1.00 | 45.15 |     | O0 |
| ANISOU13922 O ILE E 78    | 6400    | 6050   | 4710   | -20  | 1130  | 130 | O0 |
| ATOM 13923 CB ILE E 78    | -20.262 | -0.162 | 8.846  | 1.00 | 45.55 |     | C0 |
| ANISOU13923 CB ILE E 78   | 6220    | 6100   | 4990   | -30  | 1120  | 140 | C0 |
| ATOM 13924 CG1 ILE E 78   | -21.154 | 0.436  | 9.937  | 1.00 | 45.44 |     | C0 |
| ANISOU13924 CG1 ILE E 78  | 6180    | 6120   | 4970   | 80   | 990   | 130 | C0 |
| ATOM 13925 CG2 ILE E 78   | -18.787 | -0.096 | 9.209  | 1.00 | 45.97 |     | C0 |
| ANISOU13925 CG2 ILE E 78  | 6190    | 6130   | 5140   | -140 | 1230  | 130 | C0 |
| ATOM 13926 CD1 ILE E 78   | -21.572 | -0.563 | 10.980 | 1.00 | 45.08 |     | C0 |
| ANISOU13926 CD1 ILE E 78  | 5940    | 6180   | 5010   | 130  | 950   | 110 | C0 |
| ATOM 13927 H ILE E 78     | -20.623 | 2.306  | 8.384  | 1.00 | 44.82 |     | H0 |
| ANISOU13927 H ILE E 78    | 6470    | 5830   | 4730   | -10  | 1030  | 180 | H0 |
| ATOM 13928 HA ILE E 78    | -19.735 | 0.290  | 6.908  | 1.00 | 46.11 |     | H0 |
| ANISOU13928 HA ILE E 78   | 6540    | 6060   | 4920   | -140 | 1230  | 160 | H0 |
| ATOM 13929 HB ILE E 78    | -20.501 | -1.119 | 8.768  | 1.00 | 45.06 |     | H0 |
| ANISOU13929 HB ILE E 78   | 6080    | 6090   | 4950   | -10  | 1130  | 120 | H0 |
| ATOM 13930 HG12 ILE E 78  | -20.670 | 1.167  | 10.377 | 1.00 | 45.75 |     | H0 |
| ANISOU13930 HG12 ILE E 78 | 6250    | 6110   | 5030   | 50   | 990   | 140 | H0 |

|                           |         |        |        |      |       |     |    |
|---------------------------|---------|--------|--------|------|-------|-----|----|
| ATOM 13931 HG13 ILE E 78  | -21.959 | 0.812  | 9.521  | 1.00 | 45.82 |     | H0 |
| ANISOU13931 HG13 ILE E 78 | 6320    | 6150   | 4940   | 140  | 920   | 140 | H0 |
| ATOM 13932 HG21 ILE E 78  | -18.256 | -0.480 | 8.489  | 1.00 | 46.32 |     | H0 |
| ANISOU13932 HG21 ILE E 78 | 6250    | 6160   | 5190   | -200 | 1320  | 130 | H0 |
| ATOM 13933 HG22 ILE E 78  | -18.632 | -0.599 | 10.026 | 1.00 | 45.36 |     | H0 |
| ANISOU13933 HG22 ILE E 78 | 5980    | 6110   | 5150   | -120 | 1220  | 120 | H0 |
| ATOM 13934 HG23 ILE E 78  | -18.524 | 0.831  | 9.344  | 1.00 | 46.39 |     | H0 |
| ANISOU13934 HG23 ILE E 78 | 6320    | 6130   | 5170   | -170 | 1220  | 140 | H0 |
| ATOM 13935 HD11 ILE E 78  | -22.187 | -1.206 | 10.587 | 1.00 | 44.75 |     | H0 |
| ANISOU13935 HD11 ILE E 78 | 5880    | 6180   | 4940   | 160  | 940   | 110 | H0 |
| ATOM 13936 HD12 ILE E 78  | -22.013 | -0.102 | 11.713 | 1.00 | 44.79 |     | H0 |
| ANISOU13936 HD12 ILE E 78 | 5880    | 6170   | 4970   | 190  | 890   | 110 | H0 |
| ATOM 13937 HD13 ILE E 78  | -20.788 | -1.030 | 11.317 | 1.00 | 44.68 |     | H0 |
| ANISOU13937 HD13 ILE E 78 | 5800    | 6140   | 5030   | 80   | 1010  | 110 | H0 |
| ATOM 13938 N SER E 79     | -22.907 | 0.500  | 6.902  | 1.00 | 48.41 |     | N0 |
| ANISOU13938 N SER E 79    | 6900    | 6440   | 5050   | 140  | 910   | 160 | N0 |
| ATOM 13939 CA SER E 79    | -24.182 | 0.048  | 6.282  | 1.00 | 49.87 |     | C0 |
| ANISOU13939 CA SER E 79   | 7100    | 6700   | 5140   | 220  | 810   | 150 | C0 |
| ATOM 13940 C SER E 79     | -23.994 | -0.153 | 4.773  | 1.00 | 50.53 |     | C0 |
| ANISOU13940 C SER E 79    | 7360    | 6730   | 5110   | 140  | 860   | 170 | C0 |
| ATOM 13941 O SER E 79     | -24.727 | -0.979 | 4.199  | 1.00 | 52.64 |     | O0 |
| ANISOU13941 O SER E 79    | 7600    | 7070   | 5320   | 140  | 820   | 140 | O0 |
| ATOM 13942 CB SER E 79    | -25.318 | 1.006  | 6.574  | 1.00 | 50.97 |     | C0 |
| ANISOU13942 CB SER E 79   | 7290    | 6860   | 5220   | 370  | 660   | 170 | C0 |
| ATOM 13943 OG SER E 79    | -25.264 | 2.130  | 5.709  | 1.00 | 52.91 |     | O0 |
| ANISOU13943 OG SER E 79   | 7780    | 6980   | 5350   | 380  | 620   | 210 | O0 |
| ATOM 13944 H SER E 79     | -23.012 | 1.262  | 7.389  | 1.00 | 48.30 |     | H0 |
| ANISOU13944 H SER E 79    | 6920    | 6400   | 5040   | 180  | 870   | 170 | H0 |
| ATOM 13945 HA SER E 79    | -24.413 | -0.834 | 6.680  | 1.00 | 49.08 |     | H0 |
| ANISOU13945 HA SER E 79   | 6860    | 6680   | 5100   | 210  | 810   | 130 | H0 |
| ATOM 13946 HB2 SER E 79   | -26.176 | 0.541  | 6.453  | 1.00 | 51.02 |     | H0 |
| ANISOU13946 HB2 SER E 79  | 7230    | 6950   | 5210   | 420  | 590   | 160 | H0 |
| ATOM 13947 HB3 SER E 79   | -25.262 | 1.308  | 7.509  | 1.00 | 50.55 |     | H0 |
| ANISOU13947 HB3 SER E 79  | 7160    | 6810   | 5230   | 400  | 650   | 160 | H0 |
| ATOM 13948 N SER E 80     | -23.055 | 0.570  | 4.154  | 1.00 | 50.72 |     | N0 |
| ANISOU13948 N SER E 80    | 7550    | 6640   | 5080   | 60   | 950   | 200 | N0 |
| ATOM 13949 CA SER E 80    | -22.751 | 0.501  | 2.699  | 1.00 | 50.88 |     | C0 |
| ANISOU13949 CA SER E 80   | 7770    | 6600   | 4970   | -30  | 1020  | 210 | C0 |
| ATOM 13950 C SER E 80     | -21.769 | -0.636 | 2.383  | 1.00 | 49.67 |     | C0 |
| ANISOU13950 C SER E 80    | 7530    | 6460   | 4880   | -150 | 1200  | 170 | C0 |
| ATOM 13951 O SER E 80     | -21.646 | -0.978 | 1.185  | 1.00 | 51.22 |     | O0 |
| ANISOU13951 O SER E 80    | 7870    | 6630   | 4960   | -220 | 1270  | 160 | O0 |
| ATOM 13952 CB SER E 80    | -22.229 | 1.821  | 2.196  | 1.00 | 52.35 |     | C0 |
| ANISOU13952 CB SER E 80   | 8190    | 6640   | 5060   | -80  | 1050  | 260 | C0 |
| ATOM 13953 OG SER E 80    | -23.260 | 2.799  | 2.201  | 1.00 | 53.46 |     | O0 |
| ANISOU13953 OG SER E 80   | 8450    | 6750   | 5110   | 60   | 880   | 310 | O0 |
| ATOM 13954 H SER E 80     | -22.538 | 1.184  | 4.582  | 1.00 | 50.62 |     | H0 |
| ANISOU13954 H SER E 80    | 7550    | 6570   | 5110   | 40   | 980   | 210 | H0 |
| ATOM 13955 HA SER E 80    | -23.602 | 0.306  | 2.223  | 1.00 | 51.29 |     | H0 |
| ANISOU13955 HA SER E 80   | 7860    | 6690   | 4940   | 20   | 930   | 210 | H0 |
| ATOM 13956 HB2 SER E 80   | -21.486 | 2.121  | 2.767  | 1.00 | 52.12 |     | H0 |
| ANISOU13956 HB2 SER E 80  | 8110    | 6580   | 5110   | -130 | 1120  | 260 | H0 |
| ATOM 13957 HB3 SER E 80   | -21.886 | 1.711  | 1.280  | 1.00 | 53.18 |     | H0 |
| ANISOU13957 HB3 SER E 80  | 8410    | 6710   | 5080   | -160 | 1120  | 270 | H0 |

|                           |         |        |       |      |       |      |    |
|---------------------------|---------|--------|-------|------|-------|------|----|
| ATOM 13958 N LEU E 81     | -21.093 | -1.186 | 3.398 | 1.00 | 47.15 |      | N0 |
| ANISOU13958 N LEU E 81    | 7000    | 6180   | 4730  | -170 | 1270  | 140  | N0 |
| ATOM 13959 CA LEU E 81    | -19.999 | -2.185 | 3.249 | 1.00 | 46.27 |      | C0 |
| ANISOU13959 CA LEU E 81   | 6790    | 6080   | 4710  | -250 | 1450  | 100  | C0 |
| ATOM 13960 C LEU E 81     | -20.463 | -3.557 | 3.741 | 1.00 | 45.22 |      | C0 |
| ANISOU13960 C LEU E 81    | 6490    | 6030   | 4660  | -210 | 1430  | 60   | C0 |
| ATOM 13961 O LEU E 81     | -21.298 | -3.606 | 4.667 | 1.00 | 43.91 |      | O0 |
| ANISOU13961 O LEU E 81    | 6220    | 5920   | 4540  | -120 | 1300  | 60   | O0 |
| ATOM 13962 CB LEU E 81    | -18.779 | -1.741 | 4.061 | 1.00 | 45.46 |      | C0 |
| ANISOU13962 CB LEU E 81   | 6580    | 5960   | 4740  | -300 | 1540  | 110  | C0 |
| ATOM 13963 CG LEU E 81    | -18.127 | -0.429 | 3.633 | 1.00 | 46.37 |      | C0 |
| ANISOU13963 CG LEU E 81   | 6850    | 5990   | 4780  | -390 | 1590  | 140  | C0 |
| ATOM 13964 CD1 LEU E 81   | -16.996 | -0.065 | 4.578 | 1.00 | 46.04 |      | C0 |
| ANISOU13964 CD1 LEU E 81  | 6660    | 5950   | 4880  | -460 | 1660  | 140  | C0 |
| ATOM 13965 CD2 LEU E 81   | -17.624 | -0.507 | 2.202 | 1.00 | 47.54 |      | C0 |
| ANISOU13965 CD2 LEU E 81  | 7170    | 6080   | 4810  | -500 | 1740  | 140  | C0 |
| ATOM 13966 H LEU E 81     | -21.264 | -0.977 | 4.264 | 1.00 | 46.69 |      | H0 |
| ANISOU13966 H LEU E 81    | 6850    | 6150   | 4740  | -120 | 1220  | 140  | H0 |
| ATOM 13967 HA LEU E 81    | -19.758 | -2.252 | 2.297 | 1.00 | 47.13 |      | H0 |
| ANISOU13967 HA LEU E 81   | 7020    | 6150   | 4730  | -310 | 1520  | 90   | H0 |
| ATOM 13968 HB2 LEU E 81   | -19.049 | -1.658 | 4.997 | 1.00 | 44.81 |      | H0 |
| ANISOU13968 HB2 LEU E 81  | 6390    | 5910   | 4720  | -250 | 1460  | 110  | H0 |
| ATOM 13969 HB3 LEU E 81   | -18.105 | -2.448 | 4.013 | 1.00 | 45.62 |      | H0 |
| ANISOU13969 HB3 LEU E 81  | 6510    | 6000   | 4830  | -340 | 1650  | 80   | H0 |
| ATOM 13970 HG LEU E 81    | -18.810 | 0.285  | 3.681 | 1.00 | 46.38 |      | H0 |
| ANISOU13970 HG LEU E 81   | 6950    | 5950   | 4710  | -350 | 1480  | 170  | H0 |
| ATOM 13971 HD11 LEU E 81  | -17.343 | 0.018  | 5.483 | 1.00 | 45.33 |      | H0 |
| ANISOU13971 HD11 LEU E 81 | 6480    | 5890   | 4850  | -390 | 1560  | 150  | H0 |
| ATOM 13972 HD12 LEU E 81  | -16.602 | 0.781  | 4.303 | 1.00 | 46.93 |      | H0 |
| ANISOU13972 HD12 LEU E 81 | 6880    | 6000   | 4950  | -530 | 1690  | 170  | H0 |
| ATOM 13973 HD13 LEU E 81  | -16.316 | -0.761 | 4.555 | 1.00 | 46.17 |      | H0 |
| ANISOU13973 HD13 LEU E 81 | 6560    | 6010   | 4980  | -490 | 1760  | 120  | H0 |
| ATOM 13974 HD21 LEU E 81  | -17.136 | -1.339 | 2.074 | 1.00 | 47.59 |      | H0 |
| ANISOU13974 HD21 LEU E 81 | 7080    | 6130   | 4880  | -520 | 1840  | 100  | H0 |
| ATOM 13975 HD22 LEU E 81  | -17.034 | 0.246  | 2.024 | 1.00 | 48.38 |      | H0 |
| ANISOU13975 HD22 LEU E 81 | 7350    | 6140   | 4890  | -580 | 1800  | 160  | H0 |
| ATOM 13976 HD23 LEU E 81  | -18.379 | -0.478 | 1.589 | 1.00 | 47.87 |      | H0 |
| ANISOU13976 HD23 LEU E 81 | 7340    | 6110   | 4740  | -470 | 1670  | 150  | H0 |
| ATOM 13977 N TRPE 82      | -19.918 | -4.625 | 3.153 | 1.00 | 45.12 |      | N0 |
| ANISOU13977 N TRPE 82     | 6470    | 6010   | 4660  | -260 | 1560  | 10   | N0 |
| ATOM 13978 CA TRPE 82     | -19.878 | -5.962 | 3.797 | 1.00 | 44.58 |      | C0 |
| ANISOU13978 CA TRPE 82    | 6240    | 5980   | 4720  | -230 | 1580  | -30  | C0 |
| ATOM 13979 C TRPE 82      | -19.003 | -5.850 | 5.051 | 1.00 | 43.78 |      | C0 |
| ANISOU13979 C TRPE 82     | 5950    | 5900   | 4790  | -200 | 1610  | -10  | C0 |
| ATOM 13980 O TRPE 82      | -17.923 | -5.245 | 4.967 | 1.00 | 44.23 |      | O0 |
| ANISOU13980 O TRPE 82     | 6000    | 5930   | 4880  | -250 | 1710  | 0    | O0 |
| ATOM 13981 CB TRPE 82     | -19.373 | -7.054 | 2.844 | 1.00 | 45.06 |      | C0 |
| ANISOU13981 CB TRPE 82    | 6360    | 6000   | 4760  | -280 | 1730  | -80  | C0 |
| ATOM 13982 CG TRPE 82     | -19.213 | -8.387 | 3.510 | 1.00 | 44.25 |      | C0 |
| ANISOU13982 CG TRPE 82    | 6120    | 5910   | 4790  | -240 | 1770  | -120 | C0 |
| ATOM 13983 CD1 TRPE 82    | -20.136 | -9.391 | 3.576 | 1.00 | 44.10 |      | C0 |
| ANISOU13983 CD1 TRPE 82   | 6100    | 5910   | 4750  | -230 | 1700  | -140 | C0 |
| ATOM 13984 CD2 TRPE 82    | -18.064 | -8.854 | 4.240 | 1.00 | 44.00 |      | C0 |
| ANISOU13984 CD2 TRPE 82   | 5920    | 5870   | 4920  | -200 | 1870  | -120 | C0 |

|                           |         |         |        |      |       |      |    |
|---------------------------|---------|---------|--------|------|-------|------|----|
| ATOM 13985 NE1 TRP E 82   | -19.638 | -10.452 | 4.282  | 1.00 | 43.66 | N0   |    |
| ANISOU13985 NE1 TRP E 82  | 5930    | 5830    | 4830   | -190 | 1760  | -160 | N0 |
| ATOM 13986 CE2 TRP E 82   | -18.368 | -10.152 | 4.701  | 1.00 | 43.89 | C0   |    |
| ANISOU13986 CE2 TRP E 82  | 5850    | 5850    | 4980   | -160 | 1860  | -140 | C0 |
| ATOM 13987 CE3 TRP E 82   | -16.808 | -8.312  | 4.533  | 1.00 | 44.40 | C0   |    |
| ANISOU13987 CE3 TRP E 82  | 5870    | 5930    | 5070   | -210 | 1970  | -100 | C0 |
| ATOM 13988 CZ2 TRP E 82   | -17.458 | -10.911 | 5.434  | 1.00 | 44.21 | C0   |    |
| ANISOU13988 CZ2 TRP E 82  | 5740    | 5880    | 5180   | -100 | 1930  | -140 | C0 |
| ATOM 13989 CZ3 TRP E 82   | -15.911 | -9.061  | 5.260  | 1.00 | 44.78 | C0   |    |
| ANISOU13989 CZ3 TRP E 82  | 5750    | 5990    | 5280   | -160 | 2040  | -110 | C0 |
| ATOM 13990 CH2 TRP E 82   | -16.234 | -10.343 | 5.705  | 1.00 | 44.53 | C0   |    |
| ANISOU13990 CH2 TRP E 82  | 5670    | 5940    | 5310   | -90  | 2010  | -130 | C0 |
| ATOM 13991 H TRP E 82     | -19.538 | -4.602  | 2.325  | 1.00 | 46.06 | H0   |    |
| ANISOU13991 H TRP E 82    | 6690    | 6090    | 4720   | -310 | 1640  | 0    | H0 |
| ATOM 13992 HA TRP E 82    | -20.794 | -6.194  | 4.068  | 1.00 | 44.05 | H0   |    |
| ANISOU13992 HA TRP E 82   | 6150    | 5950    | 4630   | -190 | 1470  | -20  | H0 |
| ATOM 13993 HB2 TRP E 82   | -20.007 | -7.137  | 2.102  | 1.00 | 45.50 | H0   |    |
| ANISOU13993 HB2 TRP E 82  | 6540    | 6050    | 4700   | -300 | 1700  | -100 | H0 |
| ATOM 13994 HB3 TRP E 82   | -18.511 | -6.771  | 2.476  | 1.00 | 45.68 | H0   |    |
| ANISOU13994 HB3 TRP E 82  | 6460    | 6050    | 4840   | -320 | 1850  | -90  | H0 |
| ATOM 13995 HD1 TRP E 82   | -20.997 | -9.364  | 3.191  | 1.00 | 44.14 | H0   |    |
| ANISOU13995 HD1 TRP E 82  | 6180    | 5930    | 4660   | -240 | 1610  | -150 | H0 |
| ATOM 13996 HE1 TRP E 82   | -20.061 | -11.201 | 4.437  | 1.00 | 43.75 | H0   |    |
| ANISOU13996 HE1 TRP E 82  | 5930    | 5840    | 4850   | -190 | 1730  | -170 | H0 |
| ATOM 13997 HE3 TRP E 82   | -16.580 | -7.446  | 4.234  | 1.00 | 44.75 | H0   |    |
| ANISOU13997 HE3 TRP E 82  | 5970    | 5970    | 5070   | -260 | 1980  | -90  | H0 |
| ATOM 13998 HZ2 TRP E 82   | -17.677 | -11.776 | 5.737  | 1.00 | 44.10 | H0   |    |
| ANISOU13998 HZ2 TRP E 82  | 5710    | 5840    | 5200   | -70  | 1920  | -150 | H0 |
| ATOM 13999 HZ3 TRP E 82   | -15.063 | -8.700  | 5.466  | 1.00 | 45.06 | H0   |    |
| ANISOU13999 HZ3 TRP E 82  | 5700    | 6040    | 5380   | -170 | 2090  | -100 | H0 |
| ATOM 14000 HH2 TRP E 82   | -15.603 | -10.830 | 6.205  | 1.00 | 44.73 | H0   |    |
| ANISOU14000 HH2 TRP E 82  | 5590    | 5960    | 5450   | -40  | 2050  | -130 | H0 |
| ATOM 14001 N VAL E 83     | -19.475 | -6.396  | 6.168  | 1.00 | 43.15 | N0   |    |
| ANISOU14001 N VAL E 83    | 5730    | 5870    | 4790   | -140 | 1520  | 0    | N0 |
| ATOM 14002 CA VAL E 83    | -18.758 | -6.420  | 7.475  | 1.00 | 43.03 | C0   |    |
| ANISOU14002 CA VAL E 83   | 5540    | 5890    | 4930   | -110 | 1520  | 20   | C0 |
| ATOM 14003 C VAL E 83     | -18.702 | -7.877  | 7.924  | 1.00 | 42.41 | C0   |    |
| ANISOU14003 C VAL E 83    | 5360    | 5820    | 4940   | -70  | 1550  | 0    | C0 |
| ATOM 14004 O VAL E 83     | -19.660 | -8.613  | 7.718  | 1.00 | 42.02 | O0   |    |
| ANISOU14004 O VAL E 83    | 5350    | 5780    | 4840   | -70  | 1500  | -20  | O0 |
| ATOM 14005 CB VAL E 83    | -19.467 | -5.506  | 8.497  | 1.00 | 42.98 | C0   |    |
| ANISOU14005 CB VAL E 83   | 5490    | 5920    | 4910   | -60  | 1380  | 50   | C0 |
| ATOM 14006 CG1 VAL E 83   | -18.771 | -5.495  | 9.844  | 1.00 | 43.30 | C0   |    |
| ANISOU14006 CG1 VAL E 83  | 5370    | 6000    | 5080   | -40  | 1360  | 70   | C0 |
| ATOM 14007 CG2 VAL E 83   | -19.602 | -4.086  | 7.969  | 1.00 | 43.49 | C0   |    |
| ANISOU14007 CG2 VAL E 83  | 5700    | 5950    | 4870   | -90  | 1340  | 70   | C0 |
| ATOM 14008 H VAL E 83     | -20.291 | -6.800  | 6.203  | 1.00 | 42.92 | H0   |    |
| ANISOU14008 H VAL E 83    | 5710    | 5870    | 4730   | -120 | 1460  | -10  | H0 |
| ATOM 14009 HA VAL E 83    | -17.853 | -6.094  | 7.338  | 1.00 | 43.46 | H0   |    |
| ANISOU14009 HA VAL E 83   | 5570    | 5920    | 5020   | -140 | 1600  | 20   | H0 |
| ATOM 14010 HB VAL E 83    | -20.378 | -5.865  | 8.632  | 1.00 | 42.66 | H0   |    |
| ANISOU14010 HB VAL E 83   | 5450    | 5920    | 4840   | -30  | 1300  | 50   | H0 |
| ATOM 14011 HG11 VAL E 83  | -18.823 | -6.379  | 10.246 | 1.00 | 42.82 | H0   |    |
| ANISOU14011 HG11 VAL E 83 | 5240    | 5960    | 5070   | -20  | 1360  | 70   | H0 |

|                           |         |         |        |      |       |     |
|---------------------------|---------|---------|--------|------|-------|-----|
| ATOM 14012 HG12 VAL E 83  | -19.205 | -4.849  | 10.429 | 1.00 | 42.73 | H0  |
| ANISOU14012 HG12 VAL E 83 | 5300    | 5950    | 4990   | -20  | 1280  | 90  |
| ATOM 14013 HG13 VAL E 83  | -17.838 | -5.247  | 9.726  | 1.00 | 43.52 | H0  |
| ANISOU14013 HG13 VAL E 83 | 5380    | 6010    | 5150   | -80  | 1430  | 70  |
| ATOM 14014 HG21 VAL E 83  | -18.731 | -3.763  | 7.679  | 1.00 | 43.98 | H0  |
| ANISOU14014 HG21 VAL E 83 | 5780    | 5970    | 4950   | -140 | 1430  | 70  |
| ATOM 14015 HG22 VAL E 83  | -19.943 | -3.508  | 8.672  | 1.00 | 43.12 | H0  |
| ANISOU14015 HG22 VAL E 83 | 5630    | 5920    | 4830   | -50  | 1260  | 90  |
| ATOM 14016 HG23 VAL E 83  | -20.217 | -4.076  | 7.215  | 1.00 | 43.75 | H0  |
| ANISOU14016 HG23 VAL E 83 | 5840    | 5970    | 4820   | -80  | 1320  | 70  |
| ATOM 14017 N PRO E 84     | -17.586 | -8.361  | 8.512  | 1.00 | 43.03 | N0  |
| ANISOU14017 N PRO E 84    | 5300    | 5890    | 5150   | -50  | 1620  | 10  |
| ATOM 14018 CA PRO E 84    | -17.526 | -9.733  | 9.012  | 1.00 | 43.42 | C0  |
| ANISOU14018 CA PRO E 84   | 5270    | 5930    | 5290   | 0    | 1640  | 0   |
| ATOM 14019 C PRO E 84     | -18.577 | -9.938  | 10.117 | 1.00 | 42.67 | C0  |
| ANISOU14019 C PRO E 84    | 5130    | 5880    | 5190   | 30   | 1500  | 30  |
| ATOM 14020 O PRO E 84     | -18.780 | -9.027  | 10.912 | 1.00 | 42.63 | O0  |
| ANISOU14020 O PRO E 84    | 5080    | 5930    | 5180   | 40   | 1410  | 60  |
| ATOM 14021 CB PRO E 84    | -16.095 | -9.876  | 9.559  | 1.00 | 44.09 | C0  |
| ANISOU14021 CB PRO E 84   | 5210    | 6020    | 5520   | 40   | 1710  | 10  |
| ATOM 14022 CG PRO E 84    | -15.319 | -8.744  | 8.921  | 1.00 | 44.72 | C0  |
| ANISOU14022 CG PRO E 84   | 5300    | 6110    | 5580   | -30  | 1790  | 0   |
| ATOM 14023 CD PRO E 84    | -16.327 | -7.632  | 8.731  | 1.00 | 44.05 | C0  |
| ANISOU14023 CD PRO E 84   | 5340    | 6030    | 5360   | -80  | 1690  | 20  |
| ATOM 14024 HA PRO E 84    | -17.671 | -10.370 | 8.269  | 1.00 | 43.85 | H0  |
| ANISOU14024 HA PRO E 84   | 5410    | 5940    | 5310   | -10  | 1700  | -30 |
| ATOM 14025 HB2 PRO E 84   | -16.084 | -9.795  | 10.534 | 1.00 | 43.65 | H0  |
| ANISOU14025 HB2 PRO E 84  | 5060    | 6010    | 5520   | 70   | 1640  | 50  |
| ATOM 14026 HB3 PRO E 84   | -15.711 | -10.744 | 9.311  | 1.00 | 44.66 | H0  |
| ANISOU14026 HB3 PRO E 84  | 5270    | 6060    | 5640   | 70   | 1790  | -10 |
| ATOM 14027 HG2 PRO E 84   | -14.588 | -8.453  | 9.504  | 1.00 | 44.90 | H0  |
| ANISOU14027 HG2 PRO E 84  | 5210    | 6170    | 5680   | -20  | 1790  | 20  |
| ATOM 14028 HG3 PRO E 84   | -14.944 | -9.022  | 8.060  | 1.00 | 45.45 | H0  |
| ANISOU14028 HG3 PRO E 84  | 5440    | 6170    | 5660   | -50  | 1900  | -30 |
| ATOM 14029 HD2 PRO E 84   | -16.382 | -7.066  | 9.523  | 1.00 | 43.48 | H0  |
| ANISOU14029 HD2 PRO E 84  | 5220    | 5990    | 5310   | -70  | 1610  | 50  |
| ATOM 14030 HD3 PRO E 84   | -16.098 | -7.082  | 7.960  | 1.00 | 44.44 | H0  |
| ANISOU14030 HD3 PRO E 84  | 5470    | 6060    | 5350   | -130 | 1750  | 10  |
| ATOM 14031 N ASPE 85      | -19.231 | -11.102 | 10.143 | 1.00 | 41.98 | N0  |
| ANISOU14031 N ASPE 85     | 5080    | 5770    | 5100   | 40   | 1480  | 20  |
| ATOM 14032 CA ASPE 85     | -20.337 | -11.399 | 11.097 | 1.00 | 41.06 | C0  |
| ANISOU14032 CA ASPE 85    | 4930    | 5710    | 4960   | 40   | 1370  | 50  |
| ATOM 14033 C ASPE 85      | -19.735 | -11.865 | 12.429 | 1.00 | 40.87 | C0  |
| ANISOU14033 C ASPE 85     | 4790    | 5700    | 5050   | 90   | 1350  | 100 |
| ATOM 14034 O ASPE 85      | -20.105 | -12.961 | 12.896 | 1.00 | 41.65 | O0  |
| ANISOU14034 O ASPE 85     | 4890    | 5770    | 5170   | 90   | 1330  | 110 |
| ATOM 14035 CB ASPE 85     | -21.321 | -12.417 | 10.509 | 1.00 | 41.09 | C0  |
| ANISOU14035 CB ASPE 85    | 5020    | 5690    | 4900   | -10  | 1370  | 20  |
| ATOM 14036 CG ASPE 85     | -20.700 | -13.761 | 10.168 | 1.00 | 41.81 | C0  |
| ANISOU14036 CG ASPE 85    | 5170    | 5670    | 5050   | -10  | 1470  | -10 |
| ATOM 14037 OD1 ASPE 85    | -19.480 | -13.787 | 9.880  | 1.00 | 41.77 | O0  |
| ANISOU14037 OD1 ASPE 85   | 5140    | 5610    | 5120   | 40   | 1570  | -20 |
| ATOM 14038 OD2 ASPE 85    | -21.433 | -14.771 | 10.217 | 1.00 | 41.63 | O0  |
| ANISOU14038 OD2 ASPE 85   | 5200    | 5620    | 5000   | -50  | 1450  | -20 |

|                          |         |         |        |      |       |     |    |
|--------------------------|---------|---------|--------|------|-------|-----|----|
| ATOM 14039 H ASPE 85     | -19.034 | -11.786 | 9.575  | 1.00 | 42.62 |     | H0 |
| ANISOU14039 H ASPE 85    | 5210    | 5800    | 5180   | 30   | 1550  | -10 | H0 |
| ATOM 14040 HA ASPE 85    | -20.831 | -10.563 | 11.259 | 1.00 | 40.65 |     | H0 |
| ANISOU14040 HA ASPE 85   | 4870    | 5710    | 4860   | 30   | 1300  | 60  | H0 |
| ATOM 14041 HB2 ASPE 85   | -22.047 | -12.567 | 11.148 | 1.00 | 40.84 |     | H0 |
| ANISOU14041 HB2 ASPE 85  | 4960    | 5710    | 4850   | -20  | 1300  | 30  | H0 |
| ATOM 14042 HB3 ASPE 85   | -21.709 | -12.044 | 9.691  | 1.00 | 41.31 |     | H0 |
| ANISOU14042 HB3 ASPE 85  | 5120    | 5730    | 4840   | -40  | 1360  | -10 | H0 |
| ATOM 14043 N LEUE 86     | -18.853 | -11.054 | 13.024 | 1.00 | 40.81 |     | N0 |
| ANISOU14043 N LEUE 86    | 4690    | 5720    | 5100   | 120  | 1340  | 120 | N0 |
| ATOM 14044 CA LEUE 86    | -18.139 | -11.395 | 14.283 | 1.00 | 41.47 |     | C0 |
| ANISOU14044 CA LEUE 86   | 4650    | 5820    | 5280   | 170  | 1300  | 170 | C0 |
| ATOM 14045 C LEUE 86     | -19.122 | -11.316 | 15.456 | 1.00 | 41.03 |     | C0 |
| ANISOU14045 C LEUE 86    | 4580    | 5830    | 5180   | 170  | 1190  | 210 | C0 |
| ATOM 14046 O LEUE 86     | -20.011 | -10.439 | 15.429 | 1.00 | 40.37 |     | O0 |
| ANISOU14046 O LEUE 86    | 4530    | 5800    | 5010   | 140  | 1130  | 190 | O0 |
| ATOM 14047 CB LEUE 86    | -16.958 | -10.446 | 14.503 | 1.00 | 41.98 |     | C0 |
| ANISOU14047 CB LEUE 86   | 4620    | 5920    | 5410   | 180  | 1310  | 180 | C0 |
| ATOM 14048 CG LEUE 86    | -15.919 | -10.407 | 13.385 | 1.00 | 43.32 |     | C0 |
| ANISOU14048 CG LEUE 86   | 4790    | 6050    | 5630   | 170  | 1440  | 140 | C0 |
| ATOM 14049 CD1 LEUE 86   | -14.768 | -9.480  | 13.748 | 1.00 | 43.84 |     | C0 |
| ANISOU14049 CD1 LEUE 86  | 4730    | 6160    | 5760   | 160  | 1450  | 150 | C0 |
| ATOM 14050 CD2 LEUE 86   | -15.406 | -11.805 | 13.062 | 1.00 | 44.04 |     | C0 |
| ANISOU14050 CD2 LEUE 86  | 4870    | 6070    | 5800   | 240  | 1530  | 130 | C0 |
| ATOM 14051 H LEUE 86     | -18.659 | -10.225 | 12.705 | 1.00 | 40.87 |     | H0 |
| ANISOU14051 H LEUE 86    | 4700    | 5740    | 5080   | 110  | 1340  | 110 | H0 |
| ATOM 14052 HA LEUE 86    | -17.810 | -12.318 | 14.209 | 1.00 | 41.97 |     | H0 |
| ANISOU14052 HA LEUE 86   | 4720    | 5830    | 5400   | 200  | 1340  | 180 | H0 |
| ATOM 14053 HB2 LEUE 86   | -17.311 | -9.542  | 14.628 | 1.00 | 41.60 |     | H0 |
| ANISOU14053 HB2 LEUE 86  | 4590    | 5910    | 5310   | 150  | 1260  | 180 | H0 |
| ATOM 14054 HB3 LEUE 86   | -16.509 | -10.703 | 15.333 | 1.00 | 42.22 |     | H0 |
| ANISOU14054 HB3 LEUE 86  | 4570    | 5970    | 5500   | 220  | 1270  | 210 | H0 |
| ATOM 14055 HG LEUE 86    | -16.356 | -10.047 | 12.576 | 1.00 | 43.06 |     | H0 |
| ANISOU14055 HG LEUE 86   | 4840    | 6000    | 5520   | 130  | 1470  | 110 | H0 |
| ATOM 14056 HD11 LEUE 86  | -15.112 | -8.585  | 13.912 | 1.00 | 43.37 |     | H0 |
| ANISOU14056 HD11 LEUE 86 | 4710    | 6130    | 5640   | 110  | 1390  | 150 | H0 |
| ATOM 14057 HD12 LEUE 86  | -14.129 | -9.453  | 13.015 | 1.00 | 44.48 |     | H0 |
| ANISOU14057 HD12 LEUE 86 | 4800    | 6230    | 5870   | 140  | 1540  | 130 | H0 |
| ATOM 14058 HD13 LEUE 86  | -14.327 | -9.809  | 14.550 | 1.00 | 44.06 |     | H0 |
| ANISOU14058 HD13 LEUE 86 | 4670    | 6220    | 5860   | 200  | 1400  | 180 | H0 |
| ATOM 14059 HD21 LEUE 86  | -15.219 | -12.282 | 13.889 | 1.00 | 44.21 |     | H0 |
| ANISOU14059 HD21 LEUE 86 | 4830    | 6100    | 5880   | 290  | 1480  | 170 | H0 |
| ATOM 14060 HD22 LEUE 86  | -14.591 | -11.738 | 12.535 | 1.00 | 44.80 |     | H0 |
| ANISOU14060 HD22 LEUE 86 | 4920    | 6160    | 5940   | 250  | 1620  | 110 | H0 |
| ATOM 14061 HD23 LEUE 86  | -16.080 | -12.289 | 12.554 | 1.00 | 43.98 |     | H0 |
| ANISOU14061 HD23 LEUE 86 | 4960    | 6020    | 5730   | 220  | 1550  | 110 | H0 |
| ATOM 14062 N ALAE 87     | -18.962 | -12.229 | 16.417 | 1.00 | 41.43 |     | N0 |
| ANISOU14062 N ALAE 87    | 4590    | 5870    | 5280   | 200  | 1160  | 250 | N0 |
| ATOM 14063 CA ALAE 87    | -19.696 | -12.295 | 17.699 | 1.00 | 41.64 |     | C0 |
| ANISOU14063 CA ALAE 87   | 4600    | 5960    | 5270   | 200  | 1060  | 300 | C0 |
| ATOM 14064 C ALAE 87     | -18.706 | -12.644 | 18.813 | 1.00 | 42.67 |     | C0 |
| ANISOU14064 C ALAE 87    | 4650    | 6090    | 5470   | 250  | 1020  | 360 | C0 |
| ATOM 14065 O ALAE 87     | -17.814 | -13.487 | 18.578 | 1.00 | 43.14 |     | O0 |
| ANISOU14065 O ALAE 87    | 4690    | 6070    | 5620   | 310  | 1070  | 380 | O0 |

|                          |         |         |        |      |       |     |
|--------------------------|---------|---------|--------|------|-------|-----|
| ATOM 14066 CB ALA E 87   | -20.796 | -13.323 | 17.615 | 1.00 | 42.02 | C0  |
| ANISOU14066 CB ALA E 87  | 4720    | 5980    | 5260   | 150  | 1070  | 300 |
| ATOM 14067 H ALA E 87    | -18.362 | -12.910 | 16.341 | 1.00 | 42.07 | H0  |
| ANISOU14067 H ALA E 87   | 4660    | 5900    | 5420   | 240  | 1200  | 270 |
| ATOM 14068 HA ALA E 87   | -20.090 | -11.412 | 17.888 | 1.00 | 41.25 | H0  |
| ANISOU14068 HA ALA E 87  | 4540    | 5970    | 5170   | 180  | 1020  | 280 |
| ATOM 14069 HB1 ALA E 87  | -21.272 | -13.361 | 18.462 | 1.00 | 41.86 | H0  |
| ANISOU14069 HB1 ALA E 87 | 4680    | 6010    | 5210   | 130  | 1020  | 330 |
| ATOM 14070 HB2 ALA E 87  | -21.416 | -13.079 | 16.907 | 1.00 | 41.72 | H0  |
| ANISOU14070 HB2 ALA E 87 | 4720    | 5960    | 5170   | 110  | 1090  | 260 |
| ATOM 14071 HB3 ALA E 87  | -20.412 | -14.195 | 17.421 | 1.00 | 42.49 | H0  |
| ANISOU14071 HB3 ALA E 87 | 4810    | 5970    | 5360   | 160  | 1110  | 310 |
| ATOM 14072 N ALA E 88    | -18.847 | -11.999 | 19.971 | 1.00 | 42.51 | N0  |
| ANISOU14072 N ALA E 88   | 4590    | 6150    | 5420   | 250  | 940   | 390 |
| ATOM 14073 CA ALA E 88   | -18.181 | -12.398 | 21.227 | 1.00 | 43.23 | C0  |
| ANISOU14073 CA ALA E 88  | 4620    | 6260    | 5540   | 290  | 860   | 460 |
| ATOM 14074 C ALA E 88    | -18.955 | -13.590 | 21.789 | 1.00 | 43.40 | C0  |
| ANISOU14074 C ALA E 88   | 4720    | 6240    | 5520   | 280  | 850   | 510 |
| ATOM 14075 O ALA E 88    | -20.109 | -13.407 | 22.224 | 1.00 | 42.31 | O0  |
| ANISOU14075 O ALA E 88   | 4620    | 6170    | 5290   | 220  | 830   | 500 |
| ATOM 14076 CB ALA E 88   | -18.130 | -11.245 | 22.197 | 1.00 | 43.48 | C0  |
| ANISOU14076 CB ALA E 88  | 4610    | 6380    | 5530   | 280  | 780   | 460 |
| ATOM 14077 H ALA E 88    | -19.371 | -11.260 | 20.072 | 1.00 | 42.05 | H0  |
| ANISOU14077 H ALA E 88   | 4540    | 6140    | 5300   | 220  | 910   | 370 |
| ATOM 14078 HA ALA E 88   | -17.262 | -12.682 | 21.019 | 1.00 | 43.83 | H0  |
| ANISOU14078 HA ALA E 88  | 4660    | 6300    | 5700   | 340  | 880   | 470 |
| ATOM 14079 HB1 ALA E 88  | -17.865 | -11.572 | 23.072 | 1.00 | 43.78 | H0  |
| ANISOU14079 HB1 ALA E 88 | 4630    | 6440    | 5570   | 300  | 720   | 510 |
| ATOM 14080 HB2 ALA E 88  | -17.483 | -10.588 | 21.888 | 1.00 | 43.35 | H0  |
| ANISOU14080 HB2 ALA E 88 | 4550    | 6380    | 5550   | 280  | 780   | 430 |
| ATOM 14081 HB3 ALA E 88  | -19.007 | -10.831 | 22.258 | 1.00 | 42.83 | H0  |
| ANISOU14081 HB3 ALA E 88 | 4570    | 6340    | 5370   | 240  | 770   | 430 |
| ATOM 14082 N TYR E 89    | -18.346 | -14.773 | 21.732 | 1.00 | 45.04 | N0  |
| ANISOU14082 N TYR E 89   | 4950    | 6350    | 5810   | 340  | 880   | 550 |
| ATOM 14083 CA TYR E 89   | -19.000 | -16.076 | 22.004 | 1.00 | 45.83 | C0  |
| ANISOU14083 CA TYR E 89  | 5170    | 6370    | 5870   | 310  | 890   | 600 |
| ATOM 14084 C TYR E 89    | -19.552 | -16.105 | 23.433 | 1.00 | 45.68 | C0  |
| ANISOU14084 C TYR E 89   | 5170    | 6420    | 5770   | 270  | 810   | 660 |
| ATOM 14085 O TYR E 89    | -20.580 | -16.780 | 23.646 | 1.00 | 45.68 | O0  |
| ANISOU14085 O TYR E 89   | 5260    | 6400    | 5690   | 190  | 830   | 680 |
| ATOM 14086 CB TYR E 89   | -18.016 | -17.223 | 21.757 | 1.00 | 48.22 | C0  |
| ANISOU14086 CB TYR E 89  | 5500    | 6540    | 6280   | 410  | 920   | 640 |
| ATOM 14087 CG TYR E 89   | -17.638 | -17.469 | 20.316 | 1.00 | 49.37 | C0  |
| ANISOU14087 CG TYR E 89  | 5660    | 6600    | 6500   | 440  | 1030  | 560 |
| ATOM 14088 CD1 TYR E 89  | -18.362 | -16.918 | 19.270 | 1.00 | 49.05 | C0  |
| ANISOU14088 CD1 TYR E 89 | 5640    | 6590    | 6400   | 360  | 1090  | 480 |
| ATOM 14089 CD2 TYR E 89  | -16.584 | -18.311 | 19.995 | 1.00 | 51.44 | C0  |
| ANISOU14089 CD2 TYR E 89 | 5920    | 6750    | 6870   | 560  | 1080  | 580 |
| ATOM 14090 CE1 TYR E 89  | -18.027 | -17.165 | 17.948 | 1.00 | 50.03 | C0  |
| ANISOU14090 CE1 TYR E 89 | 5810    | 6640    | 6570   | 370  | 1200  | 410 |
| ATOM 14091 CE2 TYR E 89  | -16.236 | -18.569 | 18.678 | 1.00 | 52.26 | C0  |
| ANISOU14091 CE2 TYR E 89 | 6050    | 6780    | 7030   | 590  | 1200  | 500 |
| ATOM 14092 CZ TYR E 89   | -16.959 | -17.990 | 17.649 | 1.00 | 51.44 | C0  |
| ANISOU14092 CZ TYR E 89  | 5980    | 6710    | 6850   | 480  | 1260  | 420 |

|                           |                        |              |    |
|---------------------------|------------------------|--------------|----|
| ATOM 14093 OH TYR E 89    | -16.643 -18.228 16.341 | 1.00 52.94   | O0 |
| ANISOU14093 OH TYR E 89   | 6220 6820 7070         | 500 1380 350 | O0 |
| ATOM 14094 H TYR E 89     | -17.464 -14.865 21.521 | 1.00 45.37   | H0 |
| ANISOU14094 H TYR E 89    | 4950 6370 5920         | 390 890 560  | H0 |
| ATOM 14095 HA TYR E 89    | -19.764 -16.177 21.383 | 1.00 45.61   | H0 |
| ANISOU14095 HA TYR E 89   | 5190 6330 5810         | 250 940 560  | H0 |
| ATOM 14096 HB2 TYR E 89   | -17.199 -17.040 22.268 | 1.00 48.59   | H0 |
| ANISOU14096 HB2 TYR E 89  | 5470 6610 6380         | 480 870 670  | H0 |
| ATOM 14097 HB3 TYR E 89   | -18.411 -18.041 22.118 | 1.00 48.73   | H0 |
| ANISOU14097 HB3 TYR E 89  | 5650 6540 6320         | 400 920 680  | H0 |
| ATOM 14098 HD1 TYR E 89   | -19.089 -16.350 19.456 | 1.00 48.39   | H0 |
| ANISOU14098 HD1 TYR E 89  | 5560 6580 6250         | 290 1060 470 | H0 |
| ATOM 14099 HD2 TYR E 89   | -16.082 -18.707 20.689 | 1.00 52.15   | H0 |
| ANISOU14099 HD2 TYR E 89  | 5990 6820 7000         | 630 1030 640 | H0 |
| ATOM 14100 HE1 TYR E 89   | -18.524 -16.768 17.253 | 1.00 49.35   | H0 |
| ANISOU14100 HE1 TYR E 89  | 5750 6570 6430         | 310 1230 360 | H0 |
| ATOM 14101 HE2 TYR E 89   | -15.506 -19.134 18.482 | 1.00 53.12   | H0 |
| ANISOU14101 HE2 TYR E 89  | 6150 6820 7220         | 680 1230 510 | H0 |
| ATOM 14102 N ASN E 90     | -18.903 -15.399 24.367 | 1.00 44.81   | N0 |
| ANISOU14102 N ASN E 90    | 4980 6390 5650         | 320 720 700  | N0 |
| ATOM 14103 CA ASN E 90    | -19.220 -15.444 25.822 | 1.00 45.29   | C0 |
| ANISOU14103 CA ASN E 90   | 5080 6510 5620         | 290 640 770  | C0 |
| ATOM 14104 C ASN E 90     | -19.784 -14.093 26.287 | 1.00 43.92   | C0 |
| ANISOU14104 C ASN E 90    | 4860 6470 5350         | 240 610 710  | C0 |
| ATOM 14105 O ASN E 90     | -19.816 -13.864 27.506 | 1.00 44.00   | O0 |
| ANISOU14105 O ASN E 90    | 4880 6550 5280         | 230 540 750  | O0 |
| ATOM 14106 CB ASN E 90    | -18.004 -15.886 26.646 | 1.00 46.20   | C0 |
| ANISOU14106 CB ASN E 90   | 5170 6600 5790         | 390 550 850  | C0 |
| ATOM 14107 CG ASN E 90    | -16.790 -15.002 26.453 | 1.00 46.69   | C0 |
| ANISOU14107 CG ASN E 90   | 5080 6710 5940         | 450 500 820  | C0 |
| ATOM 14108 OD1 ASN E 90   | -16.466 -14.615 25.330 | 1.00 46.58   | O0 |
| ANISOU14108 OD1 ASN E 90  | 5010 6680 6010         | 460 570 750  | O0 |
| ATOM 14109 ND2 ASN E 90   | -16.106 -14.681 27.541 | 1.00 47.61   | N0 |
| ANISOU14109 ND2 ASN E 90  | 5150 6900 6040         | 480 380 870  | N0 |
| ATOM 14110 H ASN E 90     | -18.214 -14.841 24.165 | 1.00 44.93   | H0 |
| ANISOU14110 H ASN E 90    | 4930 6430 5720         | 350 710 670  | H0 |
| ATOM 14111 HA ASN E 90    | -19.920 -16.125 25.957 | 1.00 45.39   | H0 |
| ANISOU14111 HA ASN E 90   | 5170 6490 5580         | 240 670 790  | H0 |
| ATOM 14112 HB2 ASN E 90   | -18.250 -15.888 27.594 | 1.00 46.74   | H0 |
| ANISOU14112 HB2 ASN E 90  | 5270 6710 5780         | 360 490 900  | H0 |
| ATOM 14113 HB3 ASN E 90   | -17.771 -16.803 26.394 | 1.00 47.05   | H0 |
| ANISOU14113 HB3 ASN E 90  | 5320 6610 5950         | 430 570 890  | H0 |
| ATOM 14114 HD21 ASN E 90  | -15.652 -13.923 27.569 | 1.00 47.42   | H0 |
| ANISOU14114 HD21 ASN E 90 | 5050 6930 6040         | 480 350 840  | H0 |
| ATOM 14115 HD22 ASN E 90  | -16.102 -15.224 28.239 | 1.00 48.28   | H0 |
| ANISOU14115 HD22 ASN E 90 | 5290 6970 6090         | 500 330 940  | H0 |
| ATOM 14116 N ALA E 91     | -20.226 -13.236 25.361 | 1.00 42.36   | N0 |
| ANISOU14116 N ALA E 91    | 4630 6310 5160         | 210 660 620  | N0 |
| ATOM 14117 CA ALA E 91    | -20.967 -11.993 25.675 | 1.00 41.80   | C0 |
| ANISOU14117 CA ALA E 91   | 4540 6350 5000         | 180 650 560  | C0 |
| ATOM 14118 C ALA E 91     | -22.366 -12.367 26.184 | 1.00 41.54   | C0 |
| ANISOU14118 C ALA E 91    | 4550 6380 4850         | 110 680 570  | C0 |
| ATOM 14119 O ALA E 91     | -22.908 -13.391 25.729 | 1.00 42.15   | O0 |
| ANISOU14119 O ALA E 91    | 4670 6410 4940         | 60 730 580   | O0 |



|                           |         |         |        |      |       |     |    |
|---------------------------|---------|---------|--------|------|-------|-----|----|
| ATOM 14120 CB ALA E 91    | -21.028 | -11.095 | 24.467 | 1.00 | 41.31 | C0  |    |
| ANISOU14120 CB ALA E 91   | 4450    | 6280    | 4970   | 180  | 690   | 480 | C0 |
| ATOM 14121 H ALA E 91     | -20.106 | -13.355 | 24.466 | 1.00 | 42.28 | H0  |    |
| ANISOU14121 H ALA E 91    | 4610    | 6250    | 5200   | 220  | 710   | 590 | H0 |
| ATOM 14122 HA ALA E 91    | -20.489 | -11.521 | 26.396 | 1.00 | 42.01 | H0  |    |
| ANISOU14122 HA ALA E 91   | 4540    | 6410    | 5010   | 190  | 590   | 580 | H0 |
| ATOM 14123 HB1 ALA E 91   | -21.587 | -10.325 | 24.663 | 1.00 | 40.94 | H0  |    |
| ANISOU14123 HB1 ALA E 91  | 4400    | 6300    | 4860   | 170  | 680   | 440 | H0 |
| ATOM 14124 HB2 ALA E 91   | -20.133 | -10.794 | 24.240 | 1.00 | 41.28 | H0  |    |
| ANISOU14124 HB2 ALA E 91  | 4410    | 6250    | 5030   | 210  | 680   | 480 | H0 |
| ATOM 14125 HB3 ALA E 91   | -21.405 | -11.584 | 23.716 | 1.00 | 41.08 | H0  |    |
| ANISOU14125 HB3 ALA E 91  | 4440    | 6220    | 4950   | 170  | 740   | 470 | H0 |
| ATOM 14126 N ILE E 92     | -22.910 | -11.600 | 27.131 | 1.00 | 41.14 | N0  |    |
| ANISOU14126 N ILE E 92    | 4500    | 6430    | 4700   | 90   | 650   | 550 | N0 |
| ATOM 14127 CA ILE E 92    | -24.259 | -11.851 | 27.725 | 1.00 | 41.53 | C0  |    |
| ANISOU14127 CA ILE E 92   | 4570    | 6570    | 4640   | 20   | 690   | 540 | C0 |
| ATOM 14128 C ILE E 92     | -25.147 | -10.613 | 27.520 | 1.00 | 41.65 | C0  |    |
| ANISOU14128 C ILE E 92    | 4540    | 6690    | 4600   | 40   | 710   | 450 | C0 |
| ATOM 14129 O ILE E 92     | -26.250 | -10.572 | 28.092 | 1.00 | 40.73 | O0  |    |
| ANISOU14129 O ILE E 92    | 4410    | 6680    | 4380   | 0    | 750   | 420 | O0 |
| ATOM 14130 CB ILE E 92    | -24.135 | -12.275 | 29.201 | 1.00 | 42.35 | C0  |    |
| ANISOU14130 CB ILE E 92   | 4730    | 6710    | 4650   | 0    | 650   | 620 | C0 |
| ATOM 14131 CG1 ILE E 92   | -23.409 | -11.226 | 30.048 | 1.00 | 42.24 | C0  |    |
| ANISOU14131 CG1 ILE E 92  | 4710    | 6740    | 4600   | 40   | 570   | 600 | C0 |
| ATOM 14132 CG2 ILE E 92   | -23.472 | -13.642 | 29.296 | 1.00 | 42.91 | C0  |    |
| ANISOU14132 CG2 ILE E 92  | 4870    | 6660    | 4770   | -10  | 630   | 720 | C0 |
| ATOM 14133 CD1 ILE E 92   | -23.431 | -11.515 | 31.530 | 1.00 | 43.26 | C0  |    |
| ANISOU14133 CD1 ILE E 92  | 4910    | 6920    | 4610   | 10   | 530   | 670 | C0 |
| ATOM 14134 H ILE E 92     | -22.480 | -10.880 | 27.485 | 1.00 | 41.22 | H0  |    |
| ANISOU14134 H ILE E 92    | 4490    | 6470    | 4700   | 120  | 610   | 530 | H0 |
| ATOM 14135 HA ILE E 92    | -24.667 | -12.590 | 27.240 | 1.00 | 41.69 | H0  |    |
| ANISOU14135 HA ILE E 92   | 4610    | 6560    | 4670   | -10  | 730   | 550 | H0 |
| ATOM 14136 HB ILE E 92    | -25.052 | -12.363 | 29.561 | 1.00 | 42.62 | H0  |    |
| ANISOU14136 HB ILE E 92   | 4770    | 6820    | 4610   | -60  | 700   | 610 | H0 |
| ATOM 14137 HG12 ILE E 92  | -22.475 | -11.174 | 29.754 | 1.00 | 42.13 | H0  |    |
| ANISOU14137 HG12 ILE E 92 | 4680    | 6670    | 4660   | 80   | 530   | 620 | H0 |
| ATOM 14138 HG13 ILE E 92  | -23.823 | -10.351 | 29.893 | 1.00 | 41.89 | H0  |    |
| ANISOU14138 HG13 ILE E 92 | 4640    | 6750    | 4530   | 60   | 590   | 530 | H0 |
| ATOM 14139 HG21 ILE E 92  | -23.941 | -14.274 | 28.723 | 1.00 | 42.95 | H0  |    |
| ANISOU14139 HG21 ILE E 92 | 4890    | 6630    | 4800   | -50  | 690   | 720 | H0 |
| ATOM 14140 HG22 ILE E 92  | -23.502 | -13.958 | 30.215 | 1.00 | 43.70 | H0  |    |
| ANISOU14140 HG22 ILE E 92 | 5020    | 6780    | 4800   | -40  | 610   | 770 | H0 |
| ATOM 14141 HG23 ILE E 92  | -22.544 | -13.576 | 29.009 | 1.00 | 42.82 | H0  |    |
| ANISOU14141 HG23 ILE E 92 | 4840    | 6590    | 4840   | 50   | 590   | 730 | H0 |
| ATOM 14142 HD11 ILE E 92  | -24.349 | -11.655 | 31.821 | 1.00 | 43.56 | H0  |    |
| ANISOU14142 HD11 ILE E 92 | 4970    | 7020    | 4570   | -40  | 590   | 660 | H0 |
| ATOM 14143 HD12 ILE E 92  | -23.050 | -10.763 | 32.015 | 1.00 | 43.39 | H0  |    |
| ANISOU14143 HD12 ILE E 92 | 4920    | 6970    | 4590   | 30   | 480   | 640 | H0 |
| ATOM 14144 HD13 ILE E 92  | -22.910 | -12.315 | 31.714 | 1.00 | 43.79 | H0  |    |
| ANISOU14144 HD13 ILE E 92 | 5010    | 6930    | 4700   | 10   | 500   | 740 | H0 |
| ATOM 14145 N SER E 93     | -24.691 | -9.666  | 26.695 | 1.00 | 41.71 | N0  |    |
| ANISOU14145 N SER E 93    | 4520    | 6670    | 4660   | 100  | 700   | 390 | N0 |
| ATOM 14146 CA SER E 93    | -25.471 | -8.499  | 26.210 | 1.00 | 42.66 | C0  |    |
| ANISOU14146 CA SER E 93   | 4610    | 6850    | 4750   | 150  | 710   | 300 | C0 |

|                          |         |        |        |      |       |     |    |
|--------------------------|---------|--------|--------|------|-------|-----|----|
| ATOM 14147 C SER E 93    | -25.080 | -8.211 | 24.753 | 1.00 | 43.11 | C0  |    |
| ANISOU14147 C SER E 93   | 4670    | 6820   | 4890   | 170  | 720   | 270 | C0 |
| ATOM 14148 O SER E 93    | -23.948 | -8.561 | 24.354 | 1.00 | 42.70 | O0  |    |
| ANISOU14148 O SER E 93   | 4630    | 6670   | 4920   | 170  | 710   | 310 | O0 |
| ATOM 14149 CB SER E 93   | -25.253 | -7.297 | 27.094 | 1.00 | 42.66 | C0  |    |
| ANISOU14149 CB SER E 93  | 4640    | 6890   | 4690   | 190  | 670   | 260 | C0 |
| ATOM 14150 OG SER E 93   | -24.016 | -6.669 | 26.798 | 1.00 | 42.53 | O0  |    |
| ANISOU14150 OG SER E 93  | 4640    | 6780   | 4740   | 210  | 620   | 260 | O0 |
| ATOM 14151 H SER E 93    | -23.845 | -9.667 | 26.362 | 1.00 | 41.63 | H0  |    |
| ANISOU14151 H SER E 93   | 4510    | 6590   | 4720   | 120  | 680   | 400 | H0 |
| ATOM 14152 HA SER E 93   | -26.436 | -8.739 | 26.232 | 1.00 | 42.81 | H0  |    |
| ANISOU14152 HA SER E 93  | 4610    | 6930   | 4720   | 120  | 750   | 290 | H0 |
| ATOM 14153 HB2 SER E 93  | -25.987 | -6.656 | 26.961 | 1.00 | 42.84 | H0  |    |
| ANISOU14153 HB2 SER E 93 | 4650    | 6960   | 4670   | 230  | 690   | 210 | H0 |
| ATOM 14154 HB3 SER E 93  | -25.260 | -7.580 | 28.037 | 1.00 | 43.24 | H0  |    |
| ANISOU14154 HB3 SER E 93 | 4720    | 7000   | 4710   | 170  | 660   | 290 | H0 |
| ATOM 14155 N LYSE 94     | -25.986 | -7.612 | 23.980 | 1.00 | 44.76 | N0  |    |
| ANISOU14155 N LYSE 94    | 4870    | 7070   | 5070   | 200  | 730   | 210 | N0 |
| ATOM 14156 CA LYSE 94    | -25.688 | -7.162 | 22.596 | 1.00 | 46.20 | C0  |    |
| ANISOU14156 CA LYSE 94   | 5070    | 7180   | 5300   | 230  | 740   | 190 | C0 |
| ATOM 14157 C LYSE 94     | -24.696 | -6.008 | 22.680 | 1.00 | 45.81 | C0  |    |
| ANISOU14157 C LYSE 94    | 5070    | 7060   | 5270   | 270  | 700   | 170 | C0 |
| ATOM 14158 O LYSE 94     | -24.712 | -5.225 | 23.629 | 1.00 | 45.89 | O0  |    |
| ANISOU14158 O LYSE 94    | 5090    | 7110   | 5230   | 300  | 670   | 150 | O0 |
| ATOM 14159 CB LYSE 94    | -26.962 | -6.800 | 21.827 | 1.00 | 48.08 | C0  |    |
| ANISOU14159 CB LYSE 94   | 5290    | 7480   | 5490   | 260  | 740   | 130 | C0 |
| ATOM 14160 CG LYSE 94    | -27.772 | -5.632 | 22.374 | 1.00 | 50.83 | C0  |    |
| ANISOU14160 CG LYSE 94   | 5630    | 7920   | 5770   | 350  | 720   | 80  | C0 |
| ATOM 14161 CD LYSE 94    | -29.010 | -5.306 | 21.545 | 1.00 | 52.76 | C0  |    |
| ANISOU14161 CD LYSE 94   | 5830    | 8240   | 5980   | 400  | 710   | 30  | C0 |
| ATOM 14162 CE LYSE 94    | -29.704 | -6.533 | 20.983 | 1.00 | 53.86 | C0  |    |
| ANISOU14162 CE LYSE 94   | 5900    | 8440   | 6120   | 310  | 730   | 40  | C0 |
| ATOM 14163 NZ LYSE 94    | -31.021 | -6.202 | 20.387 | 1.00 | 55.50 | N0  |    |
| ANISOU14163 NZ LYSE 94   | 6040    | 8770   | 6290   | 360  | 700   | -10 | N0 |
| ATOM 14164 H LYSE 94     | -26.839 | -7.451 | 24.255 | 1.00 | 45.06 | H0  |    |
| ANISOU14164 H LYSE 94    | 4880    | 7190   | 5060   | 210  | 740   | 190 | H0 |
| ATOM 14165 HA LYSE 94    | -25.252 | -7.911 | 22.129 | 1.00 | 45.97 | H0  |    |
| ANISOU14165 HA LYSE 94   | 5050    | 7090   | 5320   | 200  | 760   | 210 | H0 |
| ATOM 14166 HB2 LYSE 94   | -26.714 | -6.595 | 20.902 | 1.00 | 47.99 | H0  |    |
| ANISOU14166 HB2 LYSE 94  | 5310    | 7410   | 5510   | 270  | 740   | 120 | H0 |
| ATOM 14167 HB3 LYSE 94   | -27.537 | -7.593 | 21.810 | 1.00 | 48.43 | H0  |    |
| ANISOU14167 HB3 LYSE 94  | 5300    | 7570   | 5530   | 220  | 760   | 140 | H0 |
| ATOM 14168 HG2 LYSE 94   | -28.051 | -5.841 | 23.290 | 1.00 | 50.90 | H0  |    |
| ANISOU14168 HG2 LYSE 94  | 5600    | 7990   | 5750   | 330  | 730   | 80  | H0 |
| ATOM 14169 HG3 LYSE 94   | -27.198 | -4.838 | 22.410 | 1.00 | 50.49 | H0  |    |
| ANISOU14169 HG3 LYSE 94  | 5630    | 7820   | 5730   | 390  | 700   | 70  | H0 |
| ATOM 14170 HD2 LYSE 94   | -29.646 | -4.812 | 22.104 | 1.00 | 53.09 | H0  |    |
| ANISOU14170 HD2 LYSE 94  | 5840    | 8360   | 5970   | 460  | 700   | 0   | H0 |
| ATOM 14171 HD3 LYSE 94   | -28.749 | -4.723 | 20.800 | 1.00 | 52.46 | H0  |    |
| ANISOU14171 HD3 LYSE 94  | 5850    | 8140   | 5950   | 440  | 680   | 20  | H0 |
| ATOM 14172 HE2 LYSE 94   | -29.143 | -6.941 | 20.297 | 1.00 | 53.47 | H0  |    |
| ANISOU14172 HE2 LYSE 94  | 5900    | 8310   | 6110   | 270  | 730   | 70  | H0 |
| ATOM 14173 HE3 LYSE 94   | -29.835 | -7.188 | 21.695 | 1.00 | 54.01 | H0  |    |
| ANISOU14173 HE3 LYSE 94  | 5890    | 8500   | 6130   | 260  | 760   | 70  | H0 |

|                          |         |        |        |      |       |      |    |
|--------------------------|---------|--------|--------|------|-------|------|----|
| ATOM 14174 HZ1 LYS E 94  | -31.563 | -5.842 | 21.019 | 1.00 | 55.67 |      | H0 |
| ANISOU14174 HZ1 LYS E 94 | 6000    | 8870   | 6280   | 410  | 700   | -30  | H0 |
| ATOM 14175 HZ2 LYS E 94  | -31.407 | -6.954 | 20.057 | 1.00 | 55.41 |      | H0 |
| ANISOU14175 HZ2 LYS E 94 | 5990    | 8790   | 6280   | 290  | 710   | 0    | H0 |
| ATOM 14176 HZ3 LYS E 94  | -30.912 | -5.604 | 19.713 | 1.00 | 55.15 |      | H0 |
| ANISOU14176 HZ3 LYS E 94 | 6040    | 8680   | 6240   | 420  | 670   | -20  | H0 |
| ATOM 14177 N PRO E 95    | -23.776 | -5.887 | 21.701 | 1.00 | 45.65 |      | N0 |
| ANISOU14177 N PRO E 95   | 5080    | 6950   | 5320   | 260  | 720   | 180  | N0 |
| ATOM 14178 CA PRO E 95   | -22.758 | -4.841 | 21.749 | 1.00 | 45.50 |      | C0 |
| ANISOU14178 CA PRO E 95  | 5100    | 6870   | 5320   | 260  | 700   | 160  | C0 |
| ATOM 14179 C PRO E 95    | -23.418 | -3.457 | 21.663 | 1.00 | 45.86 |      | C0 |
| ANISOU14179 C PRO E 95   | 5210    | 6910   | 5300   | 320  | 670   | 110  | C0 |
| ATOM 14180 O PRO E 95    | -24.220 | -3.253 | 20.776 | 1.00 | 47.24 |      | O0 |
| ANISOU14180 O PRO E 95   | 5420    | 7090   | 5440   | 360  | 680   | 80   | O0 |
| ATOM 14181 CB PRO E 95   | -21.865 | -5.155 | 20.541 | 1.00 | 45.82 |      | C0 |
| ANISOU14181 CB PRO E 95  | 5140    | 6820   | 5440   | 230  | 740   | 180  | C0 |
| ATOM 14182 CG PRO E 95   | -22.764 | -5.933 | 19.596 | 1.00 | 45.66 |      | C0 |
| ANISOU14182 CG PRO E 95  | 5130    | 6810   | 5410   | 230  | 780   | 170  | C0 |
| ATOM 14183 CD PRO E 95   | -23.690 | -6.723 | 20.494 | 1.00 | 45.37 |      | C0 |
| ANISOU14183 CD PRO E 95  | 5050    | 6860   | 5330   | 230  | 770   | 190  | C0 |
| ATOM 14184 HA PRO E 95   | -22.234 | -4.924 | 22.584 | 1.00 | 45.84 |      | H0 |
| ANISOU14184 HA PRO E 95  | 5120    | 6920   | 5380   | 250  | 670   | 180  | H0 |
| ATOM 14185 HB2 PRO E 95  | -21.545 | -4.330 | 20.117 | 1.00 | 45.81 |      | H0 |
| ANISOU14185 HB2 PRO E 95 | 5190    | 6780   | 5440   | 230  | 740   | 160  | H0 |
| ATOM 14186 HB3 PRO E 95  | -21.091 | -5.695 | 20.809 | 1.00 | 45.83 |      | H0 |
| ANISOU14186 HB3 PRO E 95 | 5100    | 6810   | 5500   | 210  | 750   | 210  | H0 |
| ATOM 14187 HG2 PRO E 95  | -23.274 | -5.325 | 19.023 | 1.00 | 45.58 |      | H0 |
| ANISOU14187 HG2 PRO E 95 | 5170    | 6800   | 5350   | 250  | 780   | 140  | H0 |
| ATOM 14188 HG3 PRO E 95  | -22.237 | -6.533 | 19.031 | 1.00 | 45.60 |      | H0 |
| ANISOU14188 HG3 PRO E 95 | 5120    | 6750   | 5450   | 210  | 820   | 190  | H0 |
| ATOM 14189 HD2 PRO E 95  | -24.566 | -6.837 | 20.082 | 1.00 | 45.50 |      | H0 |
| ANISOU14189 HD2 PRO E 95 | 5070    | 6910   | 5310   | 230  | 770   | 170  | H0 |
| ATOM 14190 HD3 PRO E 95  | -23.318 | -7.600 | 20.701 | 1.00 | 45.54 |      | H0 |
| ANISOU14190 HD3 PRO E 95 | 5050    | 6860   | 5390   | 200  | 780   | 220  | H0 |
| ATOM 14191 N GLU E 96    | -23.094 | -2.567 | 22.602 | 1.00 | 46.39 |      | N0 |
| ANISOU14191 N GLU E 96   | 5320    | 6980   | 5330   | 330  | 630   | 80   | N0 |
| ATOM 14192 CA GLU E 96   | -23.531 | -1.145 | 22.589 | 1.00 | 48.21 |      | C0 |
| ANISOU14192 CA GLU E 96  | 5650    | 7180   | 5500   | 390  | 600   | 30   | C0 |
| ATOM 14193 C GLU E 96    | -22.446 | -0.309 | 21.891 | 1.00 | 47.18 |      | C0 |
| ANISOU14193 C GLU E 96   | 5600    | 6920   | 5400   | 340  | 600   | 20   | C0 |
| ATOM 14194 O GLU E 96    | -21.403 | -0.025 | 22.522 | 1.00 | 46.90 |      | O0 |
| ANISOU14194 O GLU E 96   | 5560    | 6860   | 5390   | 270  | 580   | 30   | O0 |
| ATOM 14195 CB GLU E 96   | -23.815 | -0.655 | 24.010 | 1.00 | 50.37 |      | C0 |
| ANISOU14195 CB GLU E 96  | 5930    | 7510   | 5700   | 420  | 570   | -10  | C0 |
| ATOM 14196 CG GLU E 96   | -24.664 | 0.604  | 24.058 | 1.00 | 53.36 |      | C0 |
| ANISOU14196 CG GLU E 96  | 6410    | 7860   | 6000   | 520  | 560   | -80  | C0 |
| ATOM 14197 CD GLU E 96   | -25.121 | 1.008  | 25.451 | 1.00 | 56.23 |      | C0 |
| ANISOU14197 CD GLU E 96  | 6790    | 8290   | 6280   | 560  | 550   | -130 | C0 |
| ATOM 14198 OE1 GLU E 96  | -26.291 | 1.427  | 25.592 | 1.00 | 58.97 |      | O0 |
| ANISOU14198 OE1 GLU E 96 | 7140    | 8700   | 6570   | 680  | 560   | -180 | O0 |
| ATOM 14199 OE2 GLU E 96  | -24.307 | 0.901  | 26.393 | 1.00 | 58.62 |      | O0 |
| ANISOU14199 OE2 GLU E 96 | 7100    | 8600   | 6570   | 480  | 520   | -120 | O0 |
| ATOM 14200 H GLU E 96    | -22.576 | -2.781 | 23.320 | 1.00 | 46.79 |      | H0 |
| ANISOU14200 H GLU E 96   | 5340    | 7050   | 5390   | 300  | 610   | 100  | H0 |

|                           |         |        |        |      |       |      |    |
|---------------------------|---------|--------|--------|------|-------|------|----|
| ATOM 14201 HA GLU E 96    | -24.362 | -1.081 | 22.065 | 1.00 | 48.00 |      | H0 |
| ANISOU14201 HA GLU E 96   | 5630    | 7170   | 5440   | 440  | 610   | 10   | H0 |
| ATOM 14202 HB2 GLU E 96   | -24.275 | -1.368 | 24.501 | 1.00 | 50.43 |      | H0 |
| ANISOU14202 HB2 GLU E 96  | 5880    | 7590   | 5690   | 420  | 580   | 10   | H0 |
| ATOM 14203 HB3 GLU E 96   | -22.963 | -0.482 | 24.460 | 1.00 | 50.64 |      | H0 |
| ANISOU14203 HB3 GLU E 96  | 5980    | 7510   | 5750   | 360  | 550   | 0    | H0 |
| ATOM 14204 HG2 GLU E 96   | -24.151 | 1.347  | 23.673 | 1.00 | 53.50 |      | H0 |
| ANISOU14204 HG2 GLU E 96  | 6510    | 7790   | 6020   | 510  | 550   | -90  | H0 |
| ATOM 14205 HG3 GLU E 96   | -25.458 | 0.473  | 23.497 | 1.00 | 53.23 |      | H0 |
| ANISOU14205 HG3 GLU E 96  | 6370    | 7880   | 5980   | 580  | 570   | -80  | H0 |
| ATOM 14206 N VAL E 97     | -22.679 | 0.060  | 20.629 | 1.00 | 45.62 |      | N0 |
| ANISOU14206 N VAL E 97    | 5470    | 6660   | 5200   | 360  | 630   | 20   | N0 |
| ATOM 14207 CA VAL E 97    | -21.723 | 0.866  | 19.812 | 1.00 | 44.88 |      | C0 |
| ANISOU14207 CA VAL E 97   | 5480    | 6450   | 5130   | 290  | 650   | 20   | C0 |
| ATOM 14208 C VAL E 97     | -21.843 | 2.329  | 20.251 | 1.00 | 44.36 |      | C0 |
| ANISOU14208 C VAL E 97    | 5560    | 6300   | 4990   | 330  | 600   | -20  | C0 |
| ATOM 14209 O VAL E 97     | -22.943 | 2.899  | 20.129 | 1.00 | 44.38 |      | O0 |
| ANISOU14209 O VAL E 97    | 5640    | 6300   | 4930   | 440  | 580   | -50  | O0 |
| ATOM 14210 CB VAL E 97    | -21.969 | 0.687  | 18.303 | 1.00 | 44.85 |      | C0 |
| ANISOU14210 CB VAL E 97   | 5530    | 6400   | 5120   | 300  | 690   | 40   | C0 |
| ATOM 14211 CG1 VAL E 97   | -20.996 | 1.520  | 17.474 | 1.00 | 45.77 |      | C0 |
| ANISOU14211 CG1 VAL E 97  | 5760    | 6390   | 5240   | 220  | 720   | 50   | C0 |
| ATOM 14212 CG2 VAL E 97   | -21.900 | -0.781 | 17.901 | 1.00 | 44.18 |      | C0 |
| ANISOU14212 CG2 VAL E 97  | 5320    | 6370   | 5090   | 270  | 730   | 70   | C0 |
| ATOM 14213 H VAL E 97     | -23.447 | -0.151 | 20.189 | 1.00 | 45.60 |      | H0 |
| ANISOU14213 H VAL E 97    | 5460    | 6690   | 5180   | 410  | 630   | 20   | H0 |
| ATOM 14214 HA VAL E 97    | -20.820 | 0.558  | 20.011 | 1.00 | 44.82 |      | H0 |
| ANISOU14214 HA VAL E 97   | 5420    | 6440   | 5170   | 220  | 660   | 40   | H0 |
| ATOM 14215 HB VAL E 97    | -22.884 | 1.011  | 18.112 | 1.00 | 45.04 |      | H0 |
| ANISOU14215 HB VAL E 97   | 5590    | 6430   | 5090   | 380  | 660   | 20   | H0 |
| ATOM 14216 HG11 VAL E 97  | -21.260 | 2.456  | 17.506 | 1.00 | 46.20 |      | H0 |
| ANISOU14216 HG11 VAL E 97 | 5920    | 6390   | 5240   | 250  | 690   | 30   | H0 |
| ATOM 14217 HG12 VAL E 97  | -21.008 | 1.213  | 16.551 | 1.00 | 45.62 |      | H0 |
| ANISOU14217 HG12 VAL E 97 | 5760    | 6350   | 5220   | 210  | 760   | 60   | H0 |
| ATOM 14218 HG13 VAL E 97  | -20.098 | 1.425  | 17.836 | 1.00 | 45.76 |      | H0 |
| ANISOU14218 HG13 VAL E 97 | 5710    | 6390   | 5290   | 140  | 740   | 50   | H0 |
| ATOM 14219 HG21 VAL E 97  | -21.065 | -1.166 | 18.221 | 1.00 | 44.14 |      | H0 |
| ANISOU14219 HG21 VAL E 97 | 5250    | 6370   | 5150   | 220  | 750   | 90   | H0 |
| ATOM 14220 HG22 VAL E 97  | -21.941 | -0.855 | 16.932 | 1.00 | 44.24 |      | H0 |
| ANISOU14220 HG22 VAL E 97 | 5370    | 6350   | 5090   | 260  | 760   | 80   | H0 |
| ATOM 14221 HG23 VAL E 97  | -22.649 | -1.262 | 18.294 | 1.00 | 43.96 |      | H0 |
| ANISOU14221 HG23 VAL E 97 | 5240    | 6420   | 5050   | 320  | 710   | 70   | H0 |
| ATOM 14222 N LEU E 98     | -20.750 | 2.895  | 20.767 | 1.00 | 44.14 |      | N0 |
| ANISOU14222 N LEU E 98    | 5560    | 6220   | 4990   | 230  | 590   | -30  | N0 |
| ATOM 14223 CA LEU E 98    | -20.699 | 4.264  | 21.349 | 1.00 | 44.66 |      | C0 |
| ANISOU14223 CA LEU E 98   | 5790    | 6200   | 4990   | 220  | 550   | -80  | C0 |
| ATOM 14224 C LEU E 98     | -20.334 | 5.286  | 20.267 | 1.00 | 44.80 |      | C0 |
| ANISOU14224 C LEU E 98    | 5980    | 6060   | 4980   | 180  | 570   | -80  | C0 |
| ATOM 14225 O LEU E 98     | -20.709 | 6.465  | 20.432 | 1.00 | 46.12 |      | O0 |
| ANISOU14225 O LEU E 98    | 6330    | 6120   | 5080   | 230  | 540   | -120 | O0 |
| ATOM 14226 CB LEU E 98    | -19.663 | 4.287  | 22.478 | 1.00 | 45.03 |      | C0 |
| ANISOU14226 CB LEU E 98   | 5780    | 6270   | 5060   | 110  | 520   | -90  | C0 |
| ATOM 14227 CG LEU E 98    | -19.853 | 3.246  | 23.584 | 1.00 | 44.68 |      | C0 |
| ANISOU14227 CG LEU E 98   | 5580    | 6370   | 5020   | 140  | 490   | -80  | C0 |

|                           |         |       |        |      |       |      |    |
|---------------------------|---------|-------|--------|------|-------|------|----|
| ATOM 14228 CD1 LEU E 98   | -18.749 | 3.354 | 24.625 | 1.00 | 45.32 |      | C0 |
| ANISOU14228 CD1 LEU E 98  | 5620    | 6480  | 5120   | 20   | 430   | -90  | C0 |
| ATOM 14229 CD2 LEU E 98   | -21.209 | 3.391 | 24.247 | 1.00 | 44.39 |      | C0 |
| ANISOU14229 CD2 LEU E 98  | 5580    | 6390  | 4900   | 270  | 470   | -120 | C0 |
| ATOM 14230 H LEU E 98     | -19.947 | 2.464 | 20.793 | 1.00 | 44.10 |      | H0 |
| ANISOU14230 H LEU E 98    | 5490    | 6230  | 5040   | 150  | 610   | -10  | H0 |
| ATOM 14231 HA LEU E 98    | -21.588 | 4.487 | 21.709 | 1.00 | 44.74 |      | H0 |
| ANISOU14231 HA LEU E 98   | 5830    | 6230  | 4940   | 330  | 530   | -110 | H0 |
| ATOM 14232 HB2 LEU E 98   | -18.777 | 4.157 | 22.083 | 1.00 | 45.16 |      | H0 |
| ANISOU14232 HB2 LEU E 98  | 5750    | 6270  | 5130   | 10   | 540   | -70  | H0 |
| ATOM 14233 HB3 LEU E 98   | -19.675 | 5.175 | 22.886 | 1.00 | 45.80 |      | H0 |
| ANISOU14233 HB3 LEU E 98  | 5990    | 6310  | 5100   | 100  | 490   | -140 | H0 |
| ATOM 14234 HG LEU E 98    | -19.804 | 2.347 | 23.175 | 1.00 | 43.97 |      | H0 |
| ANISOU14234 HG LEU E 98   | 5390    | 6330  | 4990   | 140  | 520   | -40  | H0 |
| ATOM 14235 HD11 LEU E 98  | -17.884 | 3.375 | 24.179 | 1.00 | 45.53 |      | H0 |
| ANISOU14235 HD11 LEU E 98 | 5610    | 6480  | 5200   | -70  | 440   | -70  | H0 |
| ATOM 14236 HD12 LEU E 98  | -18.788 | 2.586 | 25.220 | 1.00 | 45.04 |      | H0 |
| ANISOU14236 HD12 LEU E 98 | 5490    | 6530  | 5090   | 30   | 420   | -60  | H0 |
| ATOM 14237 HD13 LEU E 98  | -18.867 | 4.170 | 25.141 | 1.00 | 45.98 |      | H0 |
| ANISOU14237 HD13 LEU E 98 | 5810    | 6520  | 5140   | 20   | 400   | -130 | H0 |
| ATOM 14238 HD21 LEU E 98  | -21.310 | 4.297 | 24.582 | 1.00 | 45.19 |      | H0 |
| ANISOU14238 HD21 LEU E 98 | 5800    | 6430  | 4940   | 290  | 450   | -170 | H0 |
| ATOM 14239 HD22 LEU E 98  | -21.277 | 2.762 | 24.987 | 1.00 | 44.31 |      | H0 |
| ANISOU14239 HD22 LEU E 98 | 5490    | 6460  | 4880   | 270  | 460   | -110 | H0 |
| ATOM 14240 HD23 LEU E 98  | -21.912 | 3.204 | 23.600 | 1.00 | 44.15 |      | H0 |
| ANISOU14240 HD23 LEU E 98 | 5540    | 6360  | 4860   | 350  | 500   | -110 | H0 |
| ATOM 14241 N THR E 99     | -19.631 | 4.852 | 19.216 | 1.00 | 43.62 |      | N0 |
| ANISOU14241 N THR E 99    | 5790    | 5890  | 4890   | 90   | 630   | -40  | N0 |
| ATOM 14242 CA THR E 99    | -18.945 | 5.728 | 18.226 | 1.00 | 44.24 |      | C0 |
| ANISOU14242 CA THR E 99   | 6030    | 5830  | 4950   | -10  | 670   | -20  | C0 |
| ATOM 14243 C THR E 99     | -19.728 | 5.808 | 16.917 | 1.00 | 43.67 |      | C0 |
| ANISOU14243 C THR E 99    | 6070    | 5700  | 4830   | 70   | 700   | 0    | C0 |
| ATOM 14244 O THR E 99     | -20.494 | 4.909 | 16.586 | 1.00 | 42.30 |      | O0 |
| ANISOU14244 O THR E 99    | 5800    | 5620  | 4660   | 170  | 700   | 20   | O0 |
| ATOM 14245 CB THR E 99    | -17.519 | 5.234 | 17.970 | 1.00 | 44.07 |      | C0 |
| ANISOU14245 CB THR E 99   | 5880    | 5840  | 5020   | -190 | 740   | 0    | C0 |
| ATOM 14246 OG1 THR E 99   | -17.583 | 3.824 | 17.755 | 1.00 | 42.59 |      | O0 |
| ANISOU14246 OG1 THR E 99  | 5510    | 5770  | 4900   | -150 | 770   | 30   | O0 |
| ATOM 14247 CG2 THR E 99   | -16.584 | 5.548 | 19.118 | 1.00 | 44.70 |      | C0 |
| ANISOU14247 CG2 THR E 99  | 5900    | 5950  | 5140   | -300 | 700   | -30  | C0 |
| ATOM 14248 H THR E 99     | -19.519 | 3.969 | 19.026 | 1.00 | 43.18 |      | H0 |
| ANISOU14248 H THR E 99    | 5620    | 5910  | 4880   | 80   | 660   | -10  | H0 |
| ATOM 14249 HA THR E 99    | -18.893 | 6.629 | 18.614 | 1.00 | 44.89 |      | H0 |
| ANISOU14249 HA THR E 99   | 6230    | 5830  | 4990   | -30  | 640   | -50  | H0 |
| ATOM 14250 HB THR E 99    | -17.179 | 5.669 | 17.152 | 1.00 | 44.61 |      | H0 |
| ANISOU14250 HB THR E 99   | 6040    | 5830  | 5080   | -250 | 780   | 10   | H0 |
| ATOM 14251 HG21 THR E 99  | -16.194 | 6.432 | 18.988 | 1.00 | 45.62 |      | H0 |
| ANISOU14251 HG21 THR E 99 | 6130    | 5970  | 5230   | -390 | 700   | -40  | H0 |
| ATOM 14252 HG22 THR E 99  | -15.875 | 4.884 | 19.151 | 1.00 | 44.58 |      | H0 |
| ANISOU14252 HG22 THR E 99 | 5730    | 6010  | 5200   | -360 | 720   | -10  | H0 |
| ATOM 14253 HG23 THR E 99  | -17.080 | 5.534 | 19.956 | 1.00 | 44.48 |      | H0 |
| ANISOU14253 HG23 THR E 99 | 5860    | 5960  | 5090   | -230 | 640   | -50  | H0 |
| ATOM 14254 N PRO E 100    | -19.541 | 6.895 | 16.132 | 1.00 | 44.98 |      | N0 |
| ANISOU14254 N PRO E 100   | 6450    | 5710  | 4930   | 30   | 710   | 10   | N0 |

|                           |         |       |        |      |       |     |    |
|---------------------------|---------|-------|--------|------|-------|-----|----|
| ATOM 14255 CA PRO E 100   | -20.075 | 6.976 | 14.772 | 1.00 | 45.34 |     | C0 |
| ANISOU14255 CA PRO E 100  | 6620    | 5690  | 4910   | 80   | 730   | 50  | C0 |
| ATOM 14256 C PRO E 100    | -19.732 | 5.729 | 13.939 | 1.00 | 44.80 |     | C0 |
| ANISOU14256 C PRO E 100   | 6410    | 5720  | 4900   | 20   | 800   | 80  | C0 |
| ATOM 14257 O PRO E 100    | -18.617 | 5.237 | 14.014 | 1.00 | 43.78 |     | O0 |
| ANISOU14257 O PRO E 100   | 6160    | 5630  | 4850   | -110 | 880   | 90  | O0 |
| ATOM 14258 CB PRO E 100   | -19.397 | 8.224 | 14.194 | 1.00 | 46.83 |     | C0 |
| ANISOU14258 CB PRO E 100  | 7060    | 5690  | 5040   | -40  | 760   | 70  | C0 |
| ATOM 14259 CG PRO E 100   | -19.135 | 9.088 | 15.404 | 1.00 | 47.39 |     | C0 |
| ANISOU14259 CG PRO E 100  | 7190    | 5700  | 5110   | -70  | 710   | 20  | C0 |
| ATOM 14260 CD PRO E 100   | -18.798 | 8.108 | 16.509 | 1.00 | 46.26 |     | C0 |
| ANISOU14260 CD PRO E 100  | 6780    | 5730  | 5060   | -90  | 700   | -10 | C0 |
| ATOM 14261 HA PRO E 100   | -21.055 | 7.112 | 14.807 | 1.00 | 45.35 |     | H0 |
| ANISOU14261 HA PRO E 100  | 6660    | 5700  | 4870   | 220  | 670   | 40  | H0 |
| ATOM 14262 HB2 PRO E 100  | -18.558 | 7.992 | 13.741 | 1.00 | 46.94 |     | H0 |
| ANISOU14262 HB2 PRO E 100 | 7040    | 5710  | 5090   | -170 | 830   | 90  | H0 |
| ATOM 14263 HB3 PRO E 100  | -19.986 | 8.682 | 13.557 | 1.00 | 47.35 |     | H0 |
| ANISOU14263 HB3 PRO E 100 | 7280    | 5680  | 5030   | 40   | 730   | 90  | H0 |
| ATOM 14264 HG2 PRO E 100  | -18.387 | 9.697 | 15.242 | 1.00 | 48.31 |     | H0 |
| ANISOU14264 HG2 PRO E 100 | 7410    | 5720  | 5220   | -200 | 740   | 20  | H0 |
| ATOM 14265 HG3 PRO E 100  | -19.928 | 9.613 | 15.636 | 1.00 | 47.75 |     | H0 |
| ANISOU14265 HG3 PRO E 100 | 7340    | 5700  | 5100   | 60   | 650   | 0   | H0 |
| ATOM 14266 HD2 PRO E 100  | -17.839 | 7.934 | 16.544 | 1.00 | 46.41 |     | H0 |
| ANISOU14266 HD2 PRO E 100 | 6720    | 5770  | 5140   | -230 | 750   | 0   | H0 |
| ATOM 14267 HD3 PRO E 100  | -19.091 | 8.444 | 17.376 | 1.00 | 46.42 |     | H0 |
| ANISOU14267 HD3 PRO E 100 | 6810    | 5760  | 5070   | -40  | 650   | -50 | H0 |
| ATOM 14268 N GLN E 101    | -20.711 | 5.241 | 13.180 | 1.00 | 45.23 |     | N0 |
| ANISOU14268 N GLN E 101   | 6470    | 5810  | 4900   | 140  | 780   | 100 | N0 |
| ATOM 14269 CA GLN E 101   | -20.662 | 3.923 | 12.499 | 1.00 | 45.49 |     | C0 |
| ANISOU14269 CA GLN E 101  | 6370    | 5940  | 4970   | 110  | 840   | 120 | C0 |
| ATOM 14270 C GLN E 101    | -20.083 | 4.109 | 11.093 | 1.00 | 45.20 |     | C0 |
| ANISOU14270 C GLN E 101   | 6470    | 5820  | 4890   | 10   | 930   | 150 | C0 |
| ATOM 14271 O GLN E 101    | -20.800 | 3.850 | 10.115 | 1.00 | 45.63 |     | O0 |
| ANISOU14271 O GLN E 101   | 6600    | 5870  | 4860   | 70   | 910   | 170 | O0 |
| ATOM 14272 CB GLN E 101   | -22.056 | 3.301 | 12.513 | 1.00 | 46.85 |     | C0 |
| ANISOU14272 CB GLN E 101  | 6470    | 6210  | 5120   | 260  | 770   | 110 | C0 |
| ATOM 14273 CG GLN E 101   | -22.499 | 2.884 | 13.910 | 1.00 | 48.21 |     | C0 |
| ANISOU14273 CG GLN E 101  | 6480    | 6500  | 5340   | 330  | 720   | 80  | C0 |
| ATOM 14274 CD GLN E 101   | -23.004 | 1.463 | 13.910 | 1.00 | 49.97 |     | C0 |
| ANISOU14274 CD GLN E 101  | 6530    | 6850  | 5610   | 350  | 730   | 80  | C0 |
| ATOM 14275 OE1 GLN E 101  | -22.278 | 0.528 | 14.255 | 1.00 | 52.52 |     | O0 |
| ANISOU14275 OE1 GLN E 101 | 6720    | 7220  | 6010   | 270  | 790   | 80  | O0 |
| ATOM 14276 NE2 GLN E 101  | -24.241 | 1.288 | 13.470 | 1.00 | 50.85 |     | N0 |
| ANISOU14276 NE2 GLN E 101 | 6640    | 7020  | 5660   | 450  | 670   | 70  | N0 |
| ATOM 14277 H GLN E 101    | -21.482 | 5.701 | 13.027 | 1.00 | 45.64 |     | H0 |
| ANISOU14277 H GLN E 101   | 6620    | 5830  | 4890   | 240  | 730   | 100 | H0 |
| ATOM 14278 HA GLN E 101   | -20.055 | 3.338 | 13.007 | 1.00 | 44.97 |     | H0 |
| ANISOU14278 HA GLN E 101  | 6170    | 5930  | 4990   | 50   | 880   | 110 | H0 |
| ATOM 14279 HB2 GLN E 101  | -22.695 | 3.951 | 12.151 | 1.00 | 47.43 |     | H0 |
| ANISOU14279 HB2 GLN E 101 | 6670    | 6240  | 5120   | 340  | 710   | 110 | H0 |
| ATOM 14280 HB3 GLN E 101  | -22.056 | 2.517 | 11.925 | 1.00 | 46.55 |     | H0 |
| ANISOU14280 HB3 GLN E 101 | 6380    | 6220  | 5090   | 240  | 800   | 120 | H0 |
| ATOM 14281 HG2 GLN E 101  | -21.744 | 2.961 | 14.532 | 1.00 | 48.20 |     | H0 |
| ANISOU14281 HG2 GLN E 101 | 6440    | 6490  | 5390   | 260  | 740   | 70  | H0 |

|                            |         |       |        |      |       |     |
|----------------------------|---------|-------|--------|------|-------|-----|
| ATOM 14282 HG3 GLN E 101   | -23.211 | 3.483 | 14.221 | 1.00 | 48.63 | H0  |
| ANISOU14282 HG3 GLN E 101  | 6580    | 6540  | 5350   | 430  | 660   | 60  |
| ATOM 14283 HE21 GLN E 101  | -24.639 | 0.504 | 13.569 | 1.00 | 50.23 | H0  |
| ANISOU14283 HE21 GLN E 101 | 6470    | 7020  | 5590   | 460  | 670   | 70  |
| ATOM 14284 HE22 GLN E 101  | -24.671 | 1.953 | 13.077 | 1.00 | 51.18 | H0  |
| ANISOU14284 HE22 GLN E 101 | 6780    | 7020  | 5640   | 510  | 630   | 70  |
| ATOM 14285 N LEU E 102     | -18.823 | 4.549 | 11.032 | 1.00 | 44.89 | N0  |
| ANISOU14285 N LEU E 102    | 6460    | 5710  | 4880   | -150 | 1010  | 160 |
| ATOM 14286 CA LEU E 102    | -18.053 | 4.821 | 9.793  | 1.00 | 45.20 | C0  |
| ANISOU14286 CA LEU E 102   | 6640    | 5670  | 4870   | -280 | 1120  | 180 |
| ATOM 14287 C LEU E 102     | -16.792 | 3.954 | 9.798  | 1.00 | 44.34 | C0  |
| ANISOU14287 C LEU E 102    | 6330    | 5640  | 4880   | -410 | 1250  | 170 |
| ATOM 14288 O LEU E 102     | -16.116 | 3.893 | 10.837 | 1.00 | 43.81 | O0  |
| ANISOU14288 O LEU E 102    | 6110    | 5630  | 4910   | -460 | 1240  | 150 |
| ATOM 14289 CB LEU E 102    | -17.690 | 6.309 | 9.743  | 1.00 | 46.66 | C0  |
| ANISOU14289 CB LEU E 102   | 7050    | 5690  | 4980   | -360 | 1120  | 200 |
| ATOM 14290 CG LEU E 102    | -18.867 | 7.283 | 9.776  | 1.00 | 47.26 | C0  |
| ANISOU14290 CG LEU E 102   | 7340    | 5660  | 4950   | -210 | 990   | 210 |
| ATOM 14291 CD1 LEU E 102   | -18.389 | 8.713 | 9.594  | 1.00 | 49.36 | C0  |
| ANISOU14291 CD1 LEU E 102  | 7870    | 5740  | 5140   | -310 | 1000  | 230 |
| ATOM 14292 CD2 LEU E 102   | -19.893 | 6.936 | 8.715  | 1.00 | 47.79 | C0  |
| ANISOU14292 CD2 LEU E 102  | 7490    | 5740  | 4920   | -90  | 940   | 240 |
| ATOM 14293 H LEU E 102     | -18.337 | 4.708 | 11.785 | 1.00 | 44.91 | H0  |
| ANISOU14293 H LEU E 102    | 6400    | 5730  | 4940   | -190 | 1010  | 140 |
| ATOM 14294 HA LEU E 102    | -18.605 | 4.584 | 9.015  | 1.00 | 45.24 | H0  |
| ANISOU14294 HA LEU E 102   | 6710    | 5670  | 4810   | -230 | 1120  | 200 |
| ATOM 14295 HB2 LEU E 102   | -17.105 | 6.507 | 10.501 | 1.00 | 46.72 | H0  |
| ANISOU14295 HB2 LEU E 102  | 6980    | 5710  | 5060   | -430 | 1120  | 180 |
| ATOM 14296 HB3 LEU E 102   | -17.178 | 6.472 | 8.926  | 1.00 | 47.46 | H0  |
| ANISOU14296 HB3 LEU E 102  | 7240    | 5740  | 5050   | -470 | 1200  | 220 |
| ATOM 14297 HG LEU E 102    | -19.301 | 7.213 | 10.661 | 1.00 | 46.81 | H0  |
| ANISOU14297 HG LEU E 102   | 7190    | 5660  | 4930   | -120 | 920   | 180 |
| ATOM 14298 HD11 LEU E 102  | -17.714 | 8.918 | 10.264 | 1.00 | 49.33 | H0  |
| ANISOU14298 HD11 LEU E 102 | 7810    | 5730  | 5200   | -410 | 1020  | 210 |
| ATOM 14299 HD12 LEU E 102  | -19.140 | 9.323 | 9.694  | 1.00 | 49.61 | H0  |
| ANISOU14299 HD12 LEU E 102 | 8040    | 5700  | 5110   | -190 | 910   | 240 |
| ATOM 14300 HD13 LEU E 102  | -18.004 | 8.817 | 8.706  | 1.00 | 49.95 | H0  |
| ANISOU14300 HD13 LEU E 102 | 8050    | 5760  | 5170   | -400 | 1070  | 270 |
| ATOM 14301 HD21 LEU E 102  | -19.439 | 6.634 | 7.909  | 1.00 | 47.92 | H0  |
| ANISOU14301 HD21 LEU E 102 | 7540    | 5750  | 4910   | -180 | 1030  | 260 |
| ATOM 14302 HD22 LEU E 102  | -20.428 | 7.723 | 8.510  | 1.00 | 48.41 | H0  |
| ANISOU14302 HD22 LEU E 102 | 7750    | 5730  | 4920   | -10  | 880   | 260 |
| ATOM 14303 HD23 LEU E 102  | -20.473 | 6.229 | 9.045  | 1.00 | 46.70 | H0  |
| ANISOU14303 HD23 LEU E 102 | 7210    | 5710  | 4820   | 10   | 900   | 220 |
| ATOM 14304 N ALA E 103     | -16.508 | 3.294 | 8.679  | 1.00 | 44.30 | N0  |
| ANISOU14304 N ALA E 103    | 6330    | 5650  | 4850   | -460 | 1360  | 180 |
| ATOM 14305 CA ALA E 103    | -15.234 | 2.592 | 8.417  | 1.00 | 44.81 | C0  |
| ANISOU14305 CA ALA E 103   | 6240    | 5780  | 5010   | -580 | 1510  | 160 |
| ATOM 14306 C ALA E 103     | -14.312 | 3.533 | 7.639  | 1.00 | 46.62 | C0  |
| ANISOU14306 C ALA E 103    | 6620    | 5920  | 5180   | -760 | 1630  | 180 |
| ATOM 14307 O ALA E 103     | -14.819 | 4.466 | 6.979  | 1.00 | 47.31 | O0  |
| ANISOU14307 O ALA E 103    | 6970    | 5880  | 5130   | -770 | 1600  | 210 |
| ATOM 14308 CB ALA E 103    | -15.487 | 1.314 | 7.655  | 1.00 | 44.21 | C0  |
| ANISOU14308 CB ALA E 103   | 6110    | 5760  | 4930   | -520 | 1570  | 150 |

|                            |         |        |       |       |       |     |    |
|----------------------------|---------|--------|-------|-------|-------|-----|----|
| ATOM 14309 H ALA E 103     | -17.088 | 3.229  | 7.979 | 1.00  | 44.48 |     | H0 |
| ANISOU14309 H ALA E 103    | 6460    | 5650   | 4790  | -410  | 1350  | 190 | H0 |
| ATOM 14310 HA ALA E 103    | -14.809 | 2.373  | 9.278 | 1.00  | 44.47 |     | H0 |
| ANISOU14310 HA ALA E 103   | 6040    | 5790   | 5060  | -580  | 1490  | 150 | H0 |
| ATOM 14311 HB1 ALA E 103   | -14.646 | 0.851  | 7.509 | 1.00  | 44.64 |     | H0 |
| ANISOU14311 HB1 ALA E 103  | 6050    | 5850   | 5050  | -580  | 1680  | 130 | H0 |
| ATOM 14312 HB2 ALA E 103   | -16.085 | 0.744  | 8.167 | 1.00  | 43.33 |     | H0 |
| ANISOU14312 HB2 ALA E 103  | 5910    | 5700   | 4850  | -420  | 1500  | 140 | H0 |
| ATOM 14313 HB3 ALA E 103   | -15.895 | 1.522  | 6.797 | 1.00  | 44.67 |     | H0 |
| ANISOU14313 HB3 ALA E 103  | 6320    | 5760   | 4890  | -520  | 1590  | 160 | H0 |
| ATOM 14314 N ARG E 104     | -13.005 | 3.293  | 7.730 | 1.00  | 47.27 |     | N0 |
| ANISOU14314 N ARG E 104    | 6530    | 6060   | 5370  | -890  | 1750  | 160 | N0 |
| ATOM 14315 CA ARG E 104    | -11.972 | 3.940  | 6.885 | 1.00  | 49.09 |     | C0 |
| ANISOU14315 CA ARG E 104   | 6850    | 6240   | 5560  | -1090 | 1910  | 170 | C0 |
| ATOM 14316 C ARG E 104     | -11.625 | 2.960  | 5.752 | 1.00  | 49.53 |     | C0 |
| ANISOU14316 C ARG E 104    | 6860    | 6350   | 5600  | -1100 | 2070  | 150 | C0 |
| ATOM 14317 O ARG E 104     | -11.166 | 1.838  | 6.066 | 1.00  | 49.46 |     | O0 |
| ANISOU14317 O ARG E 104    | 6610    | 6460   | 5730  | -1040 | 2130  | 120 | O0 |
| ATOM 14318 CB ARG E 104    | -10.783 | 4.328  | 7.770 | 1.00  | 49.85 |     | C0 |
| ANISOU14318 CB ARG E 104   | 6760    | 6400   | 5780  | -1230 | 1940  | 150 | C0 |
| ATOM 14319 CG ARG E 104    | -9.852  | 5.371  | 7.174 | 1.00  | 52.17 |     | C0 |
| ANISOU14319 CG ARG E 104   | 7180    | 6620   | 6020  | -1470 | 2060  | 160 | C0 |
| ATOM 14320 CD ARG E 104    | -10.476 | 6.742  | 6.991 | 1.00  | 52.76 |     | C0 |
| ANISOU14320 CD ARG E 104   | 7590    | 6510   | 5940  | -1520 | 1980  | 200 | C0 |
| ATOM 14321 NE ARG E 104    | -9.489  | 7.693  | 6.504 | 1.00  | 54.61 |     | N0 |
| ANISOU14321 NE ARG E 104   | 7940    | 6680   | 6130  | -1780 | 2110  | 210 | N0 |
| ATOM 14322 CZ ARG E 104    | -9.754  | 8.907  | 6.032 | 1.00  | 56.11 |     | C0 |
| ANISOU14322 CZ ARG E 104   | 8470    | 6680   | 6180  | -1880 | 2100  | 260 | C0 |
| ATOM 14323 NH1 ARG E 104   | -10.996 | 9.356  | 5.967 | 1.00  | 55.56 |     | N0 |
| ANISOU14323 NH1 ARG E 104  | 8650    | 6470   | 5990  | -1710 | 1960  | 290 | N0 |
| ATOM 14324 NH2 ARG E 104   | -8.761  | 9.671  | 5.611 | 1.00  | 58.36 |     | N0 |
| ANISOU14324 NH2 ARG E 104  | 8830    | 6910   | 6430  | -2140 | 2230  | 270 | N0 |
| ATOM 14325 H ARG E 104     | -12.662 | 2.700  | 8.330 | 1.00  | 46.85 |     | H0 |
| ANISOU14325 H ARG E 104    | 6290    | 6090   | 5420  | -860  | 1750  | 140 | H0 |
| ATOM 14326 HA ARG E 104    | -12.357 | 4.755  | 6.492 | 1.00  | 49.60 |     | H0 |
| ANISOU14326 HA ARG E 104   | 7130    | 6200   | 5510  | -1120 | 1880  | 200 | H0 |
| ATOM 14327 HB2 ARG E 104   | -11.129 | 4.668  | 8.621 | 1.00  | 49.35 |     | H0 |
| ANISOU14327 HB2 ARG E 104  | 6700    | 6320   | 5730  | -1180 | 1820  | 150 | H0 |
| ATOM 14328 HB3 ARG E 104   | -10.264 | 3.520  | 7.961 | 1.00  | 49.79 |     | H0 |
| ANISOU14328 HB3 ARG E 104  | 6540    | 6500   | 5880  | -1210 | 1990  | 130 | H0 |
| ATOM 14329 HG2 ARG E 104   | -9.066  | 5.462  | 7.754 | 1.00  | 52.66 |     | H0 |
| ANISOU14329 HG2 ARG E 104  | 7080    | 6750   | 6180  | -1560 | 2080  | 140 | H0 |
| ATOM 14330 HG3 ARG E 104   | -9.538  | 5.053  | 6.300 | 1.00  | 52.76 |     | H0 |
| ANISOU14330 HG3 ARG E 104  | 7270    | 6710   | 6070  | -1520 | 2190  | 160 | H0 |
| ATOM 14331 HD2 ARG E 104   | -11.215 | 6.681  | 6.350 | 1.00  | 52.36 |     | H0 |
| ANISOU14331 HD2 ARG E 104  | 7700    | 6400   | 5800  | -1430 | 1970  | 230 | H0 |
| ATOM 14332 HD3 ARG E 104   | -10.838 | 7.054  | 7.848 | 1.00  | 52.08 |     | H0 |
| ANISOU14332 HD3 ARG E 104  | 7500    | 6400   | 5880  | -1460 | 1860  | 190 | H0 |
| ATOM 14333 HE ARG E 104    | -8.652  | 7.446  | 6.519 | 1.00  | 55.44 |     | H0 |
| ANISOU14333 HE ARG E 104   | 7880    | 6870   | 6320  | -1880 | 2200  | 190 | H0 |
| ATOM 14334 HH11 ARG E 104  | -11.663 | 8.856  | 6.243 | 1.00  | 54.19 |     | H0 |
| ANISOU14334 HH11 ARG E 104 | 8410    | 6340   | 5840  | -1540 | 1870  | 280 | H0 |
| ATOM 14335 HH12 ARG E 104  | -11.154 | 10.162 | 5.652 | 1.00  | 56.47 |     | H0 |
| ANISOU14335 HH12 ARG E 104 | 9000    | 6450   | 6010  | -1760 | 1940  | 330 | H0 |



|             |      |           |         |        |        |       |       |     |    |
|-------------|------|-----------|---------|--------|--------|-------|-------|-----|----|
| ATOM 14336  | HH21 | ARG E 104 | -7.932  | 9.376  | 5.650  | 1.00  | 58.93 |     | H0 |
| ANISOU14336 | HH21 | ARG E 104 | 8720    | 7090   | 6580   | -2250 | 2330  | 240 | H0 |
| ATOM 14337  | HH22 | ARG E 104 | -8.928  | 10.473 | 5.296  | 1.00  | 59.26 |     | H0 |
| ANISOU14337 | HH22 | ARG E 104 | 9190    | 6890   | 6440   | -2210 | 2230  | 300 | H0 |
| ATOM 14338  | N    | VAL E 105 | -11.898 | 3.346  | 4.498  | 1.00  | 49.58 |     | N0 |
| ANISOU14338 | N    | VAL E 105 | 7120    | 6260   | 5450   | -1150 | 2150  | 180 | N0 |
| ATOM 14339  | CA   | VAL E 105 | -11.625 | 2.538  | 3.271  | 1.00  | 50.20 |     | C0 |
| ANISOU14339 | CA   | VAL E 105 | 7230    | 6370   | 5480   | -1180 | 2310  | 160 | C0 |
| ATOM 14340  | C    | VAL E 105 | -10.441 | 3.170  | 2.524  | 1.00  | 52.06 |     | C0 |
| ANISOU14340 | C    | VAL E 105 | 7520    | 6590   | 5670   | -1400 | 2520  | 160 | C0 |
| ATOM 14341  | O    | VAL E 105 | -10.540 | 4.343  | 2.123  | 1.00  | 52.98 |     | O0 |
| ANISOU14341 | O    | VAL E 105 | 7890    | 6580   | 5660   | -1520 | 2510  | 210 | O0 |
| ATOM 14342  | CB   | VAL E 105 | -12.874 | 2.424  | 2.373  | 1.00  | 49.71 |     | C0 |
| ANISOU14342 | CB   | VAL E 105 | 7410    | 6230   | 5240   | -1080 | 2240  | 180 | C0 |
| ATOM 14343  | CG1  | VAL E 105 | -12.625 | 1.561  | 1.144  | 1.00  | 50.36 |     | C0 |
| ANISOU14343 | CG1  | VAL E 105 | 7540    | 6350   | 5250   | -1110 | 2410  | 150 | C0 |
| ATOM 14344  | CG2  | VAL E 105 | -14.073 | 1.898  | 3.147  | 1.00  | 47.85 |     | C0 |
| ANISOU14344 | CG2  | VAL E 105 | 7110    | 6030   | 5040   | -880  | 2040  | 180 | C0 |
| ATOM 14345  | H    | VAL E 105 | -12.279 | 4.152  | 4.313  | 1.00  | 50.14 |     | H0 |
| ANISOU14345 | H    | VAL E 105 | 7380    | 6240   | 5430   | -1180 | 2090  | 210 | H0 |
| ATOM 14346  | HA   | VAL E 105 | -11.369 | 1.642  | 3.549  | 1.00  | 49.64 |     | H0 |
| ANISOU14346 | HA   | VAL E 105 | 6960    | 6390   | 5510   | -1120 | 2350  | 120 | H0 |
| ATOM 14347  | HB   | VAL E 105 | -13.096 | 3.335  | 2.060  | 1.00  | 50.40 |     | H0 |
| ANISOU14347 | HB   | VAL E 105 | 7700    | 6230   | 5220   | -1130 | 2210  | 220 | H0 |
| ATOM 14348  | HG11 | VAL E 105 | -12.000 | 2.012  | 0.551  | 1.00  | 51.79 |     | H0 |
| ANISOU14348 | HG11 | VAL E 105 | 7810    | 6500   | 5370   | -1240 | 2530  | 160 | H0 |
| ATOM 14349  | HG12 | VAL E 105 | -13.464 | 1.411  | 0.675  | 1.00  | 50.12 |     | H0 |
| ANISOU14349 | HG12 | VAL E 105 | 7650    | 6280   | 5120   | -1040 | 2330  | 160 | H0 |
| ATOM 14350  | HG13 | VAL E 105 | -12.251 | 0.705  | 1.418  | 1.00  | 50.03 |     | H0 |
| ANISOU14350 | HG13 | VAL E 105 | 7300    | 6380   | 5320   | -1070 | 2460  | 110 | H0 |
| ATOM 14351  | HG21 | VAL E 105 | -13.836 | 1.062  | 3.585  | 1.00  | 47.19 |     | H0 |
| ANISOU14351 | HG21 | VAL E 105 | 6830    | 6030   | 5070   | -840  | 2060  | 140 | H0 |
| ATOM 14352  | HG22 | VAL E 105 | -14.813 | 1.744  | 2.535  | 1.00  | 47.78 |     | H0 |
| ANISOU14352 | HG22 | VAL E 105 | 7230    | 6000   | 4930   | -830  | 2000  | 190 | H0 |
| ATOM 14353  | HG23 | VAL E 105 | -14.339 | 2.551  | 3.818  | 1.00  | 47.50 |     | H0 |
| ANISOU14353 | HG23 | VAL E 105 | 7080    | 5960   | 5010   | -860  | 1940  | 200 | H0 |
| ATOM 14354  | N    | VAL E 106 | -9.364  | 2.402  | 2.350  | 1.00  | 52.94 |     | N0 |
| ANISOU14354 | N    | VAL E 106 | 7400    | 6820   | 5900   | -1460 | 2700  | 110 | N0 |
| ATOM 14355  | CA   | VAL E 106 | -8.110  | 2.816  | 1.654  | 1.00  | 55.33 |     | C0 |
| ANISOU14355 | CA   | VAL E 106 | 7690    | 7150   | 6190   | -1680 | 2930  | 100 | C0 |
| ATOM 14356  | C    | VAL E 106 | -8.240  | 2.459  | 0.165  | 1.00  | 56.46 |     | C0 |
| ANISOU14356 | C    | VAL E 106 | 8030    | 7250   | 6170   | -1710 | 3090  | 90  | C0 |
| ATOM 14357  | O    | VAL E 106 | -9.058  | 1.577  | -0.156 | 1.00  | 55.14 |     | O0 |
| ANISOU14357 | O    | VAL E 106 | 7920    | 7080   | 5960   | -1550 | 3040  | 80  | O0 |
| ATOM 14358  | CB   | VAL E 106 | -6.890  | 2.146  | 2.316  | 1.00  | 55.77 |     | C0 |
| ANISOU14358 | CB   | VAL E 106 | 7350    | 7370   | 6460   | -1700 | 3030  | 40  | C0 |
| ATOM 14359  | CG1  | VAL E 106 | -5.575  | 2.681  | 1.769  | 1.00  | 58.02 |     | C0 |
| ANISOU14359 | CG1  | VAL E 106 | 7570    | 7710   | 6760   | -1940 | 3260  | 30  | C0 |
| ATOM 14360  | CG2  | VAL E 106 | -6.939  | 2.281  | 3.832  | 1.00  | 54.43 |     | C0 |
| ANISOU14360 | CG2  | VAL E 106 | 6990    | 7250   | 6440   | -1630 | 2840  | 50  | C0 |
| ATOM 14361  | H    | VAL E 106 | -9.336  | 1.540  | 2.643  | 1.00  | 52.24 |     | H0 |
| ANISOU14361 | H    | VAL E 106 | 7150    | 6800   | 5900   | -1360 | 2700  | 80  | H0 |
| ATOM 14362  | HA   | VAL E 106 | -8.016  | 3.782  | 1.735  | 1.00  | 55.98 |     | H0 |
| ANISOU14362 | HA   | VAL E 106 | 7890    | 7160   | 6220   | -1800 | 2900  | 140 | H0 |

|                            |        |        |        |       |       |      |    |
|----------------------------|--------|--------|--------|-------|-------|------|----|
| ATOM 14363 HB VAL E 106    | -6.932 | 1.181  | 2.101  | 1.00  | 55.34 |      | H0 |
| ANISOU14363 HB VAL E 106   | 7210   | 7370   | 6450   | -1590 | 3080  | 10   | H0 |
| ATOM 14364 HG11 VAL E 106  | -5.413 | 2.305  | 0.886  | 1.00  | 58.95 |      | H0 |
| ANISOU14364 HG11 VAL E 106 | 7750   | 7840   | 6810   | -1960 | 3410  | 10   | H0 |
| ATOM 14365 HG12 VAL E 106  | -4.847 | 2.431  | 2.364  | 1.00  | 58.49 |      | H0 |
| ANISOU14365 HG12 VAL E 106 | 7380   | 7880   | 6960   | -1960 | 3280  | 0    | H0 |
| ATOM 14366 HG13 VAL E 106  | -5.621 | 3.651  | 1.704  | 1.00  | 58.72 |      | H0 |
| ANISOU14366 HG13 VAL E 106 | 7830   | 7720   | 6760   | -2070 | 3240  | 70   | H0 |
| ATOM 14367 HG21 VAL E 106  | -7.159 | 3.199  | 4.069  | 1.00  | 54.54 |      | H0 |
| ANISOU14367 HG21 VAL E 106 | 7140   | 7180   | 6400   | -1710 | 2760  | 80   | H0 |
| ATOM 14368 HG22 VAL E 106  | -6.072 | 2.050  | 4.208  | 1.00  | 55.19 |      | H0 |
| ANISOU14368 HG22 VAL E 106 | 6860   | 7450   | 6660   | -1680 | 2900  | 20   | H0 |
| ATOM 14369 HG23 VAL E 106  | -7.616 | 1.683  | 4.191  | 1.00  | 52.99 |      | H0 |
| ANISOU14369 HG23 VAL E 106 | 6790   | 7070   | 6280   | -1470 | 2730  | 50   | H0 |
| ATOM 14370 N SER E 107     | -7.459 | 3.112  | -0.702 | 1.00  | 58.81 |      | N0 |
| ANISOU14370 N SER E 107    | 8460   | 7520   | 6370   | -1930 | 3290  | 100  | N0 |
| ATOM 14371 CA SER E 107    | -7.545 | 3.024  | -2.188 | 1.00  | 60.92 |      | C0 |
| ANISOU14371 CA SER E 107   | 8980   | 7740   | 6430   | -2000 | 3450  | 110  | C0 |
| ATOM 14372 C SER E 107     | -7.248 | 1.606  | -2.704 | 1.00  | 61.64 |      | C0 |
| ANISOU14372 C SER E 107    | 8910   | 7940   | 6580   | -1900 | 3610  | 20   | C0 |
| ATOM 14373 O SER E 107     | -7.667 | 1.311  | -3.840 | 1.00  | 62.56 |      | O0 |
| ANISOU14373 O SER E 107    | 9260   | 8000   | 6510   | -1890 | 3690  | 20   | O0 |
| ATOM 14374 CB SER E 107    | -6.627 | 4.024  | -2.844 | 1.00  | 63.10 |      | C0 |
| ANISOU14374 CB SER E 107   | 9390   | 7980   | 6610   | -2270 | 3650  | 140  | C0 |
| ATOM 14375 OG SER E 107    | -5.274 | 3.763  | -2.508 | 1.00  | 64.03 |      | O0 |
| ANISOU14375 OG SER E 107   | 9170   | 8250   | 6910   | -2390 | 3830  | 80   | O0 |
| ATOM 14376 H SER E 107     | -6.804 | 3.685  | -0.434 | 1.00  | 59.87 |      | H0 |
| ANISOU14376 H SER E 107    | 8530   | 7670   | 6550   | -2060 | 3340  | 110  | H0 |
| ATOM 14377 HA SER E 107    | -8.479 | 3.250  | -2.446 | 1.00  | 60.15 |      | H0 |
| ANISOU14377 HA SER E 107   | 9110   | 7540   | 6210   | -1930 | 3320  | 150  | H0 |
| ATOM 14378 HB2 SER E 107   | -6.738 | 3.978  | -3.820 | 1.00  | 64.11 |      | H0 |
| ANISOU14378 HB2 SER E 107  | 9710   | 8070   | 6590   | -2320 | 3750  | 140  | H0 |
| ATOM 14379 HB3 SER E 107   | -6.869 | 4.931  | -2.550 | 1.00  | 63.15 |      | H0 |
| ANISOU14379 HB3 SER E 107  | 9530   | 7890   | 6570   | -2340 | 3540  | 190  | H0 |
| ATOM 14380 N ASP E 108     | -6.540 | 0.773  | -1.930 | 1.00  | 61.87 |      | N0 |
| ANISOU14380 N ASP E 108    | 8570   | 8110   | 6830   | -1820 | 3660  | -40  | N0 |
| ATOM 14381 CA ASP E 108    | -6.173 | -0.617 | -2.321 | 1.00  | 62.76 |      | C0 |
| ANISOU14381 CA ASP E 108   | 8510   | 8310   | 7020   | -1700 | 3810  | -130 | C0 |
| ATOM 14382 C ASP E 108     | -7.275 | -1.602 | -1.895 | 1.00  | 60.74 |      | C0 |
| ANISOU14382 C ASP E 108    | 8250   | 8030   | 6800   | -1460 | 3620  | -140 | C0 |
| ATOM 14383 O ASP E 108     | -7.135 | -2.797 | -2.209 | 1.00  | 61.04 |      | O0 |
| ANISOU14383 O ASP E 108    | 8200   | 8110   | 6880   | -1350 | 3720  | -210 | O0 |
| ATOM 14384 CB ASP E 108    | -4.798 | -1.011 | -1.766 | 1.00  | 64.16 |      | C0 |
| ANISOU14384 CB ASP E 108   | 8300   | 8650   | 7430   | -1720 | 3960  | -190 | C0 |
| ATOM 14385 CG ASP E 108    | -4.712 | -1.137 | -0.252 | 1.00  | 62.92 |      | C0 |
| ANISOU14385 CG ASP E 108   | 7860   | 8560   | 7490   | -1610 | 3770  | -170 | C0 |
| ATOM 14386 OD1 ASP E 108   | -5.700 | -0.806 | 0.436  | 1.00  | 60.72 |      | O0 |
| ANISOU14386 OD1 ASP E 108  | 7690   | 8200   | 7180   | -1540 | 3520  | -120 | O0 |
| ATOM 14387 OD2 ASP E 108   | -3.646 | -1.566 | 0.227  | 1.00  | 64.36 |      | O0 |
| ANISOU14387 OD2 ASP E 108  | 7700   | 8890   | 7860   | -1600 | 3860  | -220 | O0 |
| ATOM 14388 H ASP E 108     | -6.226 | 1.015  | -1.111 | 1.00  | 61.52 |      | H0 |
| ANISOU14388 H ASP E 108    | 8360   | 8100   | 6910   | -1830 | 3590  | -30  | H0 |
| ATOM 14389 HA ASP E 108    | -6.109 | -0.644 | -3.304 | 1.00  | 63.93 |      | H0 |
| ANISOU14389 HA ASP E 108   | 8820   | 8430   | 7040   | -1760 | 3950  | -140 | H0 |

|                           |         |        |        |       |       |      |    |
|---------------------------|---------|--------|--------|-------|-------|------|----|
| ATOM 14390 HB2 ASP E 108  | -4.539  | -1.871 | -2.155 | 1.00  | 64.72 |      | H0 |
| ANISOU14390 HB2 ASP E 108 | 8290    | 8770   | 7530   | -1640 | 4090  | -240 | H0 |
| ATOM 14391 HB3 ASP E 108  | -4.143  | -0.342 | -2.051 | 1.00  | 65.73 |      | H0 |
| ANISOU14391 HB3 ASP E 108 | 8500    | 8880   | 7600   | -1890 | 4080  | -180 | H0 |
| ATOM 14392 N GLY E 109    | -8.318  | -1.126 | -1.206 | 1.00  | 59.26 |      | N0 |
| ANISOU14392 N GLY E 109   | 8160    | 7770   | 6580   | -1390 | 3360  | -80  | N0 |
| ATOM 14393 CA GLY E 109   | -9.512  | -1.916 | -0.841 | 1.00  | 57.46 |      | C0 |
| ANISOU14393 CA GLY E 109  | 7970    | 7510   | 6360   | -1200 | 3160  | -80  | C0 |
| ATOM 14394 C GLY E 109    | -9.520  | -2.331 | 0.623  | 1.00  | 56.22 |      | C0 |
| ANISOU14394 C GLY E 109   | 7530    | 7420   | 6410   | -1070 | 3020  | -80  | C0 |
| ATOM 14395 O GLY E 109    | -10.494 | -3.002 | 1.030  | 1.00  | 54.03 |      | O0 |
| ANISOU14395 O GLY E 109   | 7260    | 7130   | 6140   | -920  | 2860  | -80  | O0 |
| ATOM 14396 H GLY E 109    | -8.347  | -0.269 | -0.904 | 1.00  | 59.19 |      | H0 |
| ANISOU14396 H GLY E 109   | 8210    | 7730   | 6550   | -1460 | 3290  | -30  | H0 |
| ATOM 14397 HA2 GLY E 109  | -10.320 | -1.377 | -1.030 | 1.00  | 57.00 |      | H0 |
| ANISOU14397 HA2 GLY E 109 | 8100    | 7380   | 6170   | -1200 | 3050  | -40  | H0 |
| ATOM 14398 HA3 GLY E 109  | -9.549  | -2.726 | -1.409 | 1.00  | 57.81 |      | H0 |
| ANISOU14398 HA3 GLY E 109 | 8030    | 7560   | 6370   | -1150 | 3250  | -130 | H0 |
| ATOM 14399 N GLU E 110    | -8.487  | -1.963 | 1.392  | 1.00  | 57.34 |      | N0 |
| ANISOU14399 N GLU E 110   | 7440    | 7640   | 6700   | -1130 | 3060  | -80  | N0 |
| ATOM 14400 CA GLU E 110   | -8.413  | -2.238 | 2.852  | 1.00  | 56.87 |      | C0 |
| ANISOU14400 CA GLU E 110  | 7130    | 7650   | 6830   | -1030 | 2900  | -70  | C0 |
| ATOM 14401 C GLU E 110    | -9.555  | -1.493 | 3.555  | 1.00  | 55.16 |      | C0 |
| ANISOU14401 C GLU E 110   | 7060    | 7360   | 6540   | -990  | 2660  | -10  | C0 |
| ATOM 14402 O GLU E 110    | -9.809  | -0.324 | 3.208  | 1.00  | 54.73 |      | O0 |
| ANISOU14402 O GLU E 110   | 7210    | 7220   | 6360   | -1110 | 2630  | 30   | O0 |
| ATOM 14403 CB GLU E 110   | -7.065  | -1.830 | 3.452  | 1.00  | 58.74 |      | C0 |
| ANISOU14403 CB GLU E 110  | 7110    | 7990   | 7220   | -1140 | 2980  | -80  | C0 |
| ATOM 14404 CG GLU E 110   | -6.905  | -2.287 | 4.896  | 1.00  | 58.82 |      | C0 |
| ANISOU14404 CG GLU E 110  | 6860    | 8080   | 7410   | -1020 | 2830  | -80  | C0 |
| ATOM 14405 CD GLU E 110   | -5.653  | -1.820 | 5.622  | 1.00  | 60.79 |      | C0 |
| ANISOU14405 CD GLU E 110  | 6840    | 8450   | 7810   | -1120 | 2860  | -80  | C0 |
| ATOM 14406 OE1 GLU E 110  | -4.806  | -1.163 | 4.986  | 1.00  | 63.31 |      | O0 |
| ANISOU14406 OE1 GLU E 110 | 7150    | 8800   | 8100   | -1310 | 3020  | -90  | O0 |
| ATOM 14407 OE2 GLU E 110  | -5.535  | -2.113 | 6.833  | 1.00  | 61.08 |      | O0 |
| ANISOU14407 OE2 GLU E 110 | 6680    | 8550   | 7970   | -1040 | 2710  | -70  | O0 |
| ATOM 14408 H GLU E 110    | -7.762  | -1.521 | 1.065  | 1.00  | 58.71 |      | H0 |
| ANISOU14408 H GLU E 110   | 7600    | 7830   | 6870   | -1250 | 3180  | -80  | H0 |
| ATOM 14409 HA GLU E 110   | -8.538  | -3.205 | 2.988  | 1.00  | 56.33 |      | H0 |
| ANISOU14409 HA GLU E 110  | 6970    | 7600   | 6820   | -910  | 2900  | -100 | H0 |
| ATOM 14410 HB2 GLU E 110  | -6.346  | -2.218 | 2.910  | 1.00  | 60.16 |      | H0 |
| ANISOU14410 HB2 GLU E 110 | 7210    | 8220   | 7430   | -1160 | 3150  | -120 | H0 |
| ATOM 14411 HB3 GLU E 110  | -6.983  | -0.854 | 3.412  | 1.00  | 59.32 |      | H0 |
| ANISOU14411 HB3 GLU E 110 | 7280    | 8030   | 7230   | -1260 | 2970  | -50  | H0 |
| ATOM 14412 HG2 GLU E 110  | -7.681  | -1.979 | 5.410  | 1.00  | 57.41 |      | H0 |
| ANISOU14412 HG2 GLU E 110 | 6770    | 7850   | 7190   | -980  | 2670  | -40  | H0 |
| ATOM 14413 HG3 GLU E 110  | -6.916  | -3.268 | 4.914  | 1.00  | 58.46 |      | H0 |
| ANISOU14413 HG3 GLU E 110 | 6720    | 8060   | 7430   | -890  | 2850  | -100 | H0 |
| ATOM 14414 N VAL E 111    | -10.216 | -2.160 | 4.502  | 1.00  | 53.77 |      | N0 |
| ANISOU14414 N VAL E 111   | 6780    | 7200   | 6450   | -840  | 2500  | -10  | N0 |
| ATOM 14415 CA VAL E 111   | -11.306 | -1.583 | 5.340  | 1.00  | 52.62 |      | C0 |
| ANISOU14415 CA VAL E 111  | 6720    | 7010   | 6260   | -780  | 2280  | 30   | C0 |
| ATOM 14416 C VAL E 111    | -10.859 | -1.631 | 6.803  | 1.00  | 52.45 |      | C0 |
| ANISOU14416 C VAL E 111   | 6460    | 7070   | 6400   | -740  | 2180  | 40   | C0 |

|                            |         |        |        |       |       |     |    |
|----------------------------|---------|--------|--------|-------|-------|-----|----|
| ATOM 14417 O VAL E 111     | -10.472 | -2.718 | 7.267  | 1.00  | 51.88 |     | O0 |
| ANISOU14417 O VAL E 111    | 6180    | 7070   | 6460   | -650  | 2200  | 20  | O0 |
| ATOM 14418 CB VAL E 111    | -12.634 | -2.332 | 5.121  | 1.00  | 51.52 |     | C0 |
| ANISOU14418 CB VAL E 111   | 6690    | 6840   | 6040   | -640  | 2180  | 30  | C0 |
| ATOM 14419 CG1 VAL E 111   | -13.738 | -1.808 | 6.033  | 1.00  | 49.80 |     | C0 |
| ANISOU14419 CG1 VAL E 111  | 6520    | 6610   | 5800   | -560  | 1960  | 70  | C0 |
| ATOM 14420 CG2 VAL E 111   | -13.059 | -2.279 | 3.659  | 1.00  | 52.28 |     | C0 |
| ANISOU14420 CG2 VAL E 111  | 7030    | 6870   | 5970   | -680  | 2260  | 20  | C0 |
| ATOM 14421 H VAL E 111     | -10.037 | -3.031 | 4.700  | 1.00  | 53.62 |     | H0 |
| ANISOU14421 H VAL E 111    | 6630    | 7230   | 6510   | -760  | 2530  | -40 | H0 |
| ATOM 14422 HA VAL E 111    | -11.431 | -0.652 | 5.084  | 1.00  | 53.04 |     | H0 |
| ANISOU14422 HA VAL E 111   | 6920    | 7010   | 6230   | -850  | 2260  | 60  | H0 |
| ATOM 14423 HB VAL E 111    | -12.478 | -3.280 | 5.354  | 1.00  | 51.15 |     | H0 |
| ANISOU14423 HB VAL E 111   | 6510    | 6840   | 6080   | -570  | 2200  | 10  | H0 |
| ATOM 14424 HG11 VAL E 111  | -13.636 | -2.192 | 6.921  | 1.00  | 49.29 |     | H0 |
| ANISOU14424 HG11 VAL E 111 | 6300    | 6590   | 5830   | -510  | 1910  | 60  | H0 |
| ATOM 14425 HG12 VAL E 111  | -14.606 | -2.057 | 5.671  | 1.00  | 49.45 |     | H0 |
| ANISOU14425 HG12 VAL E 111 | 6570    | 6540   | 5670   | -510  | 1910  | 70  | H0 |
| ATOM 14426 HG13 VAL E 111  | -13.678 | -0.839 | 6.090  | 1.00  | 50.25 |     | H0 |
| ANISOU14426 HG13 VAL E 111 | 6660    | 6620   | 5810   | -620  | 1940  | 90  | H0 |
| ATOM 14427 HG21 VAL E 111  | -13.077 | -1.354 | 3.359  | 1.00  | 52.80 |     | H0 |
| ANISOU14427 HG21 VAL E 111 | 7230    | 6890   | 5950   | -760  | 2250  | 50  | H0 |
| ATOM 14428 HG22 VAL E 111  | -13.946 | -2.668 | 3.563  | 1.00  | 51.56 |     | H0 |
| ANISOU14428 HG22 VAL E 111 | 7000    | 6770   | 5820   | -610  | 2170  | 20  | H0 |
| ATOM 14429 HG23 VAL E 111  | -12.426 | -2.783 | 3.118  | 1.00  | 53.11 |     | H0 |
| ANISOU14429 HG23 VAL E 111 | 7090    | 6990   | 6090   | -710  | 2400  | -10 | H0 |
| ATOM 14430 N LEU E 112     | -10.897 | -0.483 | 7.484  | 1.00  | 53.21 |     | N0 |
| ANISOU14430 N LEU E 112    | 6600    | 7140   | 6480   | -810  | 2080  | 70  | N0 |
| ATOM 14431 CA LEU E 112    | -10.634 | -0.357 | 8.941  | 1.00  | 53.14 |     | C0 |
| ANISOU14431 CA LEU E 112   | 6410    | 7200   | 6580   | -780  | 1950  | 70  | C0 |
| ATOM 14432 C LEU E 112     | -11.933 | 0.077  | 9.631  | 1.00  | 51.72 |     | C0 |
| ANISOU14432 C LEU E 112    | 6360    | 6960   | 6330   | -690  | 1760  | 100 | C0 |
| ATOM 14433 O LEU E 112     | -12.367 | 1.220  | 9.407  | 1.00  | 52.69 |     | O0 |
| ANISOU14433 O LEU E 112    | 6690    | 6990   | 6340   | -750  | 1720  | 110 | O0 |
| ATOM 14434 CB LEU E 112    | -9.512  | 0.658  | 9.181  | 1.00  | 55.12 |     | C0 |
| ANISOU14434 CB LEU E 112   | 6600    | 7470   | 6870   | -960  | 2000  | 70  | C0 |
| ATOM 14435 CG LEU E 112    | -8.130  | 0.276  | 8.649  | 1.00  | 57.71 |     | C0 |
| ANISOU14435 CG LEU E 112   | 6740    | 7890   | 7300   | -1060 | 2180  | 40  | C0 |
| ATOM 14436 CD1 LEU E 112   | -7.946  | 0.720  | 7.203  | 1.00  | 58.88 |     | C0 |
| ANISOU14436 CD1 LEU E 112  | 7080    | 7970   | 7330   | -1190 | 2360  | 40  | C0 |
| ATOM 14437 CD2 LEU E 112   | -7.031  | 0.872  | 9.516  | 1.00  | 59.19 |     | C0 |
| ANISOU14437 CD2 LEU E 112  | 6730    | 8160   | 7600   | -1200 | 2160  | 30  | C0 |
| ATOM 14438 H LEU E 112     | -11.090 | 0.312  | 7.084  | 1.00  | 53.50 |     | H0 |
| ANISOU14438 H LEU E 112    | 6790    | 7110   | 6420   | -880  | 2080  | 80  | H0 |
| ATOM 14439 HA LEU E 112    | -10.364 | -1.236 | 9.291  | 1.00  | 52.93 |     | H0 |
| ANISOU14439 HA LEU E 112   | 6220    | 7240   | 6650   | -710  | 1960  | 60  | H0 |
| ATOM 14440 HB2 LEU E 112   | -9.775  | 1.506  | 8.773  | 1.00  | 55.53 |     | H0 |
| ANISOU14440 HB2 LEU E 112  | 6840    | 7430   | 6830   | -1040 | 2000  | 80  | H0 |
| ATOM 14441 HB3 LEU E 112   | -9.440  | 0.809  | 10.145 | 1.00  | 54.89 |     | H0 |
| ANISOU14441 HB3 LEU E 112  | 6480    | 7470   | 6900   | -950  | 1890  | 70  | H0 |
| ATOM 14442 HG LEU E 112    | -8.048  | -0.710 | 8.681  | 1.00  | 57.29 |     | H0 |
| ANISOU14442 HG LEU E 112   | 6560    | 7890   | 7320   | -960  | 2210  | 30  | H0 |
| ATOM 14443 HD11 LEU E 112  | -8.606  | 0.280  | 6.639  | 1.00  | 58.27 |     | H0 |
| ANISOU14443 HD11 LEU E 112 | 7110    | 7840   | 7180   | -1110 | 2370  | 40  | H0 |

|                            |         |        |        |       |       |     |    |
|----------------------------|---------|--------|--------|-------|-------|-----|----|
| ATOM 14444 HD12 LEU E 112  | -7.053  | 0.481  | 6.901  | 1.00  | 60.11 |     | H0 |
| ANISOU14444 HD12 LEU E 112 | 7100    | 8190   | 7550   | -1250 | 2490  | 10  | H0 |
| ATOM 14445 HD13 LEU E 112  | -8.060  | 1.684  | 7.142  | 1.00  | 59.27 |     | H0 |
| ANISOU14445 HD13 LEU E 112 | 7270    | 7940   | 7300   | -1290 | 2330  | 60  | H0 |
| ATOM 14446 HD21 LEU E 112  | -7.187  | 1.825  | 9.629  | 1.00  | 59.30 |     | H0 |
| ANISOU14446 HD21 LEU E 112 | 6880    | 8110   | 7540   | -1290 | 2110  | 50  | H0 |
| ATOM 14447 HD22 LEU E 112  | -6.168  | 0.734  | 9.088  | 1.00  | 60.41 |     | H0 |
| ANISOU14447 HD22 LEU E 112 | 6770    | 8380   | 7800   | -1270 | 2290  | 10  | H0 |
| ATOM 14448 HD23 LEU E 112  | -7.033  | 0.438  | 10.386 | 1.00  | 58.51 |     | H0 |
| ANISOU14448 HD23 LEU E 112 | 6510    | 8140   | 7590   | -1110 | 2060  | 30  | H0 |
| ATOM 14449 N TYR E 113     | -12.539 | -0.820 | 10.414 | 1.00  | 50.14 |     | N0 |
| ANISOU14449 N TYR E 113    | 6060    | 6810   | 6180   | -550  | 1660  | 100 | N0 |
| ATOM 14450 CA TYR E 113    | -13.734 | -0.545 | 11.250 | 1.00  | 48.57 |     | C0 |
| ANISOU14450 CA TYR E 113   | 5930    | 6600   | 5930   | -450  | 1500  | 110 | C0 |
| ATOM 14451 C TYR E 113     | -13.360 | -0.769 | 12.718 | 1.00  | 47.21 |     | C0 |
| ANISOU14451 C TYR E 113    | 5570    | 6510   | 5860   | -420  | 1410  | 110 | C0 |
| ATOM 14452 O TYR E 113     | -13.204 | -1.932 | 13.120 | 1.00  | 45.96 |     | O0 |
| ANISOU14452 O TYR E 113    | 5260    | 6420   | 5790   | -350  | 1410  | 110 | O0 |
| ATOM 14453 CB TYR E 113    | -14.915 | -1.415 | 10.813 | 1.00  | 48.37 |     | C0 |
| ANISOU14453 CB TYR E 113   | 5970    | 6570   | 5840   | -330  | 1470  | 110 | C0 |
| ATOM 14454 CG TYR E 113    | -16.175 | -1.183 | 11.610 | 1.00  | 48.02 |     | C0 |
| ANISOU14454 CG TYR E 113   | 5970    | 6530   | 5750   | -230  | 1320  | 120 | C0 |
| ATOM 14455 CD1 TYR E 113   | -16.656 | 0.100  | 11.815 | 1.00  | 48.89 |     | C0 |
| ANISOU14455 CD1 TYR E 113  | 6220    | 6580   | 5770   | -240  | 1240  | 120 | C0 |
| ATOM 14456 CD2 TYR E 113   | -16.883 | -2.234 | 12.169 | 1.00  | 47.70 |     | C0 |
| ANISOU14456 CD2 TYR E 113  | 5840    | 6550   | 5740   | -140  | 1260  | 120 | C0 |
| ATOM 14457 CE1 TYR E 113   | -17.805 | 0.333  | 12.552 | 1.00  | 48.84 |     | C0 |
| ANISOU14457 CE1 TYR E 113  | 6240    | 6590   | 5720   | -130  | 1120  | 120 | C0 |
| ATOM 14458 CE2 TYR E 113   | -18.039 | -2.019 | 12.904 | 1.00  | 47.20 |     | C0 |
| ANISOU14458 CE2 TYR E 113  | 5800    | 6510   | 5620   | -60   | 1140  | 120 | C0 |
| ATOM 14459 CZ TYR E 113    | -18.499 | -0.730 | 13.099 | 1.00  | 47.85 |     | C0 |
| ANISOU14459 CZ TYR E 113   | 6000    | 6550   | 5630   | -40   | 1070  | 120 | C0 |
| ATOM 14460 OH TYR E 113    | -19.633 | -0.497 | 13.822 | 1.00  | 49.77 |     | O0 |
| ANISOU14460 OH TYR E 113   | 6260    | 6830   | 5820   | 50    | 970   | 110 | O0 |
| ATOM 14461 H TYR E 113     | -12.256 | -1.683 | 10.490 | 1.00  | 50.06 |     | H0 |
| ANISOU14461 H TYR E 113    | 5930    | 6850   | 6240   | -500  | 1700  | 90  | H0 |
| ATOM 14462 HA TYR E 113    | -13.985 | 0.405  | 11.134 | 1.00  | 48.85 |     | H0 |
| ANISOU14462 HA TYR E 113   | 6100    | 6570   | 5890   | -490  | 1470  | 120 | H0 |
| ATOM 14463 HB2 TYR E 113   | -15.100 | -1.237 | 9.867  | 1.00  | 48.70 |     | H0 |
| ANISOU14463 HB2 TYR E 113  | 6130    | 6560   | 5810   | -360  | 1520  | 110 | H0 |
| ATOM 14464 HB3 TYR E 113   | -14.655 | -2.357 | 10.895 | 1.00  | 48.20 |     | H0 |
| ANISOU14464 HB3 TYR E 113  | 5830    | 6590   | 5890   | -300  | 1510  | 100 | H0 |
| ATOM 14465 HD1 TYR E 113   | -16.190 | 0.833  | 11.448 | 1.00  | 49.61 |     | H0 |
| ANISOU14465 HD1 TYR E 113  | 6390    | 6620   | 5840   | -310  | 1280  | 130 | H0 |
| ATOM 14466 HD2 TYR E 113   | -16.576 | -3.117 | 12.043 | 1.00  | 47.63 |     | H0 |
| ANISOU14466 HD2 TYR E 113  | 5750    | 6570   | 5780   | -130  | 1310  | 110 | H0 |
| ATOM 14467 HE1 TYR E 113   | -18.117 | 1.215  | 12.679 | 1.00  | 48.91 |     | H0 |
| ANISOU14467 HE1 TYR E 113  | 6350    | 6550   | 5670   | -120  | 1070  | 120 | H0 |
| ATOM 14468 HE2 TYR E 113   | -18.507 | -2.748 | 13.276 | 1.00  | 46.76 |     | H0 |
| ANISOU14468 HE2 TYR E 113  | 5680    | 6510   | 5580   | -10   | 1110  | 120 | H0 |
| ATOM 14469 N MET E 114     | -13.224 | 0.318  | 13.484 | 1.00  | 47.27 |     | N0 |
| ANISOU14469 N MET E 114    | 5620    | 6500   | 5850   | -490  | 1330  | 110 | N0 |
| ATOM 14470 CA MET E 114    | -12.757 | 0.303  | 14.898 | 1.00  | 47.87 |     | C0 |
| ANISOU14470 CA MET E 114   | 5540    | 6650   | 6000   | -490  | 1230  | 110 | C0 |

|                           |         |        |        |      |       |     |    |
|---------------------------|---------|--------|--------|------|-------|-----|----|
| ATOM 14471 C MET E 114    | -13.840 | 0.898  | 15.798 | 1.00 | 45.82 |     | C0 |
| ANISOU14471 C MET E 114   | 5390    | 6360   | 5660   | -420 | 1090  | 100 | C0 |
| ATOM 14472 O MET E 114    | -13.636 | 1.952  | 16.391 | 1.00 | 45.83 |     | O0 |
| ANISOU14472 O MET E 114   | 5460    | 6330   | 5630   | -490 | 1040  | 90  | O0 |
| ATOM 14473 CB MET E 114   | -11.462 | 1.108  | 15.065 | 1.00 | 50.92 |     | C0 |
| ANISOU14473 CB MET E 114  | 5860    | 7050   | 6440   | -650 | 1260  | 100 | C0 |
| ATOM 14474 CG MET E 114   | -10.520 | 1.074  | 13.864 | 1.00 | 53.41 |     | C0 |
| ANISOU14474 CG MET E 114  | 6140    | 7360   | 6790   | -760 | 1430  | 90  | C0 |
| ATOM 14475 SD MET E 114   | -9.759  | -0.542 | 13.565 | 1.00 | 56.41 |     | S0 |
| ANISOU14475 SD MET E 114  | 6270    | 7860   | 7310   | -680 | 1530  | 90  | S0 |
| ATOM 14476 CE MET E 114   | -8.112  | -0.050 | 13.054 | 1.00 | 58.06 |     | C0 |
| ANISOU14476 CE MET E 114  | 6330    | 8130   | 7600   | -870 | 1670  | 70  | C0 |
| ATOM 14477 H MET E 114    | -13.414 | 1.155  | 13.178 | 1.00 | 47.80 |     | H0 |
| ANISOU14477 H MET E 114   | 5820    | 6490   | 5840   | -530 | 1320  | 110 | H0 |
| ATOM 14478 HA MET E 114   | -12.601 | -0.631 | 15.168 | 1.00 | 47.50 |     | H0 |
| ANISOU14478 HA MET E 114  | 5360    | 6670   | 6020   | -430 | 1230  | 120 | H0 |
| ATOM 14479 HB2 MET E 114  | -11.694 | 2.038  | 15.250 | 1.00 | 51.04 |     | H0 |
| ANISOU14479 HB2 MET E 114 | 6000    | 7000   | 6390   | -710 | 1220  | 90  | H0 |
| ATOM 14480 HB3 MET E 114  | -10.985 | 0.765  | 15.846 | 1.00 | 51.00 |     | H0 |
| ANISOU14480 HB3 MET E 114 | 5720    | 7140   | 6520   | -650 | 1210  | 100 | H0 |
| ATOM 14481 HG2 MET E 114  | -11.015 | 1.341  | 13.060 | 1.00 | 53.58 |     | H0 |
| ANISOU14481 HG2 MET E 114 | 6320    | 7310   | 6730   | -770 | 1470  | 90  | H0 |
| ATOM 14482 HG3 MET E 114  | -9.807  | 1.732  | 14.004 | 1.00 | 54.74 |     | H0 |
| ANISOU14482 HG3 MET E 114 | 6290    | 7540   | 6970   | -890 | 1440  | 80  | H0 |
| ATOM 14483 HE1 MET E 114  | -7.669  | -0.798 | 12.634 | 1.00 | 58.65 |     | H0 |
| ANISOU14483 HE1 MET E 114 | 6290    | 8250   | 7740   | -830 | 1760  | 60  | H0 |
| ATOM 14484 HE2 MET E 114  | -8.175  | 0.681  | 12.428 | 1.00 | 58.65 |     | H0 |
| ANISOU14484 HE2 MET E 114 | 6550    | 8140   | 7600   | -970 | 1730  | 60  | H0 |
| ATOM 14485 HE3 MET E 114  | -7.607  | 0.230  | 13.828 | 1.00 | 58.75 |     | H0 |
| ANISOU14485 HE3 MET E 114 | 6310    | 8280   | 7740   | -920 | 1610  | 60  | H0 |
| ATOM 14486 N PRO E 115    | -15.033 | 0.269  | 15.924 | 1.00 | 43.66 |     | N0 |
| ANISOU14486 N PRO E 115   | 5150    | 6100   | 5340   | -280 | 1050  | 110 | N0 |
| ATOM 14487 CA PRO E 115   | -16.083 | 0.803  | 16.791 | 1.00 | 42.87 |     | C0 |
| ANISOU14487 CA PRO E 115  | 5130    | 5990   | 5160   | -210 | 940   | 100 | C0 |
| ATOM 14488 C PRO E 115    | -15.666 | 0.734  | 18.263 | 1.00 | 42.20 |     | C0 |
| ANISOU14488 C PRO E 115   | 4930    | 5980   | 5120   | -220 | 850   | 90  | C0 |
| ATOM 14489 O PRO E 115    | -15.004 | -0.211 | 18.627 | 1.00 | 41.90 |     | O0 |
| ANISOU14489 O PRO E 115   | 4730    | 6020   | 5170   | -220 | 860   | 120 | O0 |
| ATOM 14490 CB PRO E 115   | -17.288 | -0.118 | 16.532 | 1.00 | 42.06 |     | C0 |
| ANISOU14490 CB PRO E 115  | 5030    | 5920   | 5030   | -80  | 930   | 110 | C0 |
| ATOM 14491 CG PRO E 115   | -16.659 | -1.410 | 16.055 | 1.00 | 42.13 |     | C0 |
| ANISOU14491 CG PRO E 115  | 4910    | 5970   | 5130   | -90  | 1010  | 130 | C0 |
| ATOM 14492 CD PRO E 115   | -15.450 | -0.973 | 15.251 | 1.00 | 42.85 |     | C0 |
| ANISOU14492 CD PRO E 115  | 5000    | 6020   | 5260   | -210 | 1100  | 120 | C0 |
| ATOM 14493 HA PRO E 115   | -16.301 | 1.732  | 16.529 | 1.00 | 43.21 |     | H0 |
| ANISOU14493 HA PRO E 115  | 5310    | 5960   | 5140   | -230 | 930   | 90  | H0 |
| ATOM 14494 HB2 PRO E 115  | -17.807 | -0.262 | 17.353 | 1.00 | 41.69 |     | H0 |
| ANISOU14494 HB2 PRO E 115 | 4950    | 5920   | 4970   | -30  | 870   | 100 | H0 |
| ATOM 14495 HB3 PRO E 115  | -17.878 | 0.258  | 15.845 | 1.00 | 42.08 |     | H0 |
| ANISOU14495 HB3 PRO E 115 | 5140    | 5880   | 4970   | -60  | 930   | 100 | H0 |
| ATOM 14496 HG2 PRO E 115  | -16.388 | -1.966 | 16.814 | 1.00 | 41.92 |     | H0 |
| ANISOU14496 HG2 PRO E 115 | 4770    | 6000   | 5150   | -80  | 980   | 140 | H0 |
| ATOM 14497 HG3 PRO E 115  | -17.284 | -1.918 | 15.499 | 1.00 | 41.66 |     | H0 |
| ANISOU14497 HG3 PRO E 115 | 4880    | 5910   | 5040   | -50  | 1030  | 130 | H0 |

|             |                |         |        |        |      |          |    |
|-------------|----------------|---------|--------|--------|------|----------|----|
| ATOM 14498  | HD2 PRO E 115  | -14.745 | -1.644 | 15.281 | 1.00 | 43.21    | H0 |
| ANISOU14498 | HD2 PRO E 115  | 4930    | 6110   | 5380   | -220 | 1150 130 | H0 |
| ATOM 14499  | HD3 PRO E 115  | -15.689 | -0.803 | 14.322 | 1.00 | 43.09    | H0 |
| ANISOU14499 | HD3 PRO E 115  | 5130    | 6000   | 5240   | -220 | 1150 120 | H0 |
| ATOM 14500  | N SER E 116    | -16.035 | 1.739  | 19.057 | 1.00 | 42.39    | N0 |
| ANISOU14500 | N SER E 116    | 5060    | 5970   | 5070   | -220 | 770 70   | N0 |
| ATOM 14501  | CA SER E 116   | -15.974 | 1.665  | 20.538 | 1.00 | 42.52    | C0 |
| ANISOU14501 | CA SER E 116   | 5000    | 6060   | 5090   | -210 | 680 60   | C0 |
| ATOM 14502  | C SER E 116    | -17.267 | 1.011  | 21.029 | 1.00 | 41.72    | C0 |
| ANISOU14502 | C SER E 116    | 4900    | 6020   | 4940   | -70  | 650 60   | C0 |
| ATOM 14503  | O SER E 116    | -18.358 | 1.518  | 20.700 | 1.00 | 40.74    | O0 |
| ANISOU14503 | O SER E 116    | 4900    | 5850   | 4730   | 10   | 640 40   | O0 |
| ATOM 14504  | CB SER E 116   | -15.746 | 3.000  | 21.181 | 1.00 | 43.48    | C0 |
| ANISOU14504 | CB SER E 116   | 5250    | 6120   | 5150   | -280 | 620 10   | C0 |
| ATOM 14505  | OG SER E 116   | -15.443 | 2.834  | 22.561 | 1.00 | 44.10    | O0 |
| ANISOU14505 | OG SER E 116   | 5240    | 6280   | 5230   | -300 | 530 0    | O0 |
| ATOM 14506  | H SER E 116    | -16.350 | 2.539  | 18.754 | 1.00 | 42.70    | H0 |
| ANISOU14506 | H SER E 116    | 5230    | 5940   | 5060   | -220 | 770 50   | H0 |
| ATOM 14507  | HA SER E 116   | -15.215 | 1.071  | 20.783 | 1.00 | 42.72    | H0 |
| ANISOU14507 | HA SER E 116   | 4900    | 6150   | 5190   | -240 | 680 80   | H0 |
| ATOM 14508  | HB2 SER E 116  | -15.001 | 3.460  | 20.732 | 1.00 | 44.24    | H0 |
| ANISOU14508 | HB2 SER E 116  | 5360    | 6180   | 5270   | -380 | 650 10   | H0 |
| ATOM 14509  | HB3 SER E 116  | -16.554 | 3.553  | 21.086 | 1.00 | 43.45    | H0 |
| ANISOU14509 | HB3 SER E 116  | 5370    | 6060   | 5070   | -220 | 610 -10  | H0 |
| ATOM 14510  | N ILE E 117    | -17.135 | -0.077 | 21.785 | 1.00 | 42.01    | N0 |
| ANISOU14510 | N ILE E 117    | 4800    | 6150   | 5020   | -40  | 620 90   | N0 |
| ATOM 14511  | CA ILE E 117   | -18.268 | -0.952 | 22.199 | 1.00 | 42.27    | C0 |
| ANISOU14511 | CA ILE E 117   | 4800    | 6240   | 5010   | 60   | 610 110  | C0 |
| ATOM 14512  | C ILE E 117    | -18.296 | -1.041 | 23.733 | 1.00 | 43.30    | C0 |
| ANISOU14512 | C ILE E 117    | 4900    | 6450   | 5100   | 70   | 530 110  | C0 |
| ATOM 14513  | O ILE E 117    | -17.218 | -1.165 | 24.343 | 1.00 | 43.42    | O0 |
| ANISOU14513 | O ILE E 117    | 4840    | 6490   | 5170   | 0    | 480 130  | O0 |
| ATOM 14514  | CB ILE E 117   | -18.134 | -2.324 | 21.503 | 1.00 | 41.39    | C0 |
| ANISOU14514 | CB ILE E 117   | 4590    | 6150   | 4980   | 80   | 670 150  | C0 |
| ATOM 14515  | CG1 ILE E 117  | -18.264 | -2.167 | 19.980 | 1.00 | 41.31    | C0 |
| ANISOU14515 | CG1 ILE E 117  | 4650    | 6070   | 4980   | 70   | 750 140  | C0 |
| ATOM 14516  | CG2 ILE E 117  | -19.129 | -3.323 | 22.075 | 1.00 | 41.03    | C0 |
| ANISOU14516 | CG2 ILE E 117  | 4520    | 6170   | 4900   | 140  | 650 180  | C0 |
| ATOM 14517  | CD1 ILE E 117  | -18.047 | -3.435 | 19.183 | 1.00 | 40.89    | C0 |
| ANISOU14517 | CD1 ILE E 117  | 4530    | 6020   | 4990   | 80   | 820 170  | C0 |
| ATOM 14518  | H ILE E 117    | -16.329 | -0.358 | 22.103 | 1.00 | 42.46    | H0 |
| ANISOU14518 | H ILE E 117    | 4770    | 6240   | 5130   | -90  | 600 110  | H0 |
| ATOM 14519  | HA ILE E 117   | -19.096 | -0.542 | 21.900 | 1.00 | 41.95    | H0 |
| ANISOU14519 | HA ILE E 117   | 4840    | 6180   | 4920   | 110  | 620 80   | H0 |
| ATOM 14520  | HB ILE E 117   | -17.225 | -2.664 | 21.690 | 1.00 | 41.86    | H0 |
| ANISOU14520 | HB ILE E 117   | 4580    | 6230   | 5110   | 40   | 660 170  | H0 |
| ATOM 14521  | HG12 ILE E 117 | -19.160 | -1.823 | 19.779 | 1.00 | 41.01    | H0 |
| ANISOU14521 | HG12 ILE E 117 | 4680    | 6020   | 4870   | 120  | 740 120  | H0 |
| ATOM 14522  | HG13 ILE E 117 | -17.614 | -1.498 | 19.678 | 1.00 | 41.69    | H0 |
| ANISOU14522 | HG13 ILE E 117 | 4720    | 6080   | 5040   | 20   | 760 130  | H0 |
| ATOM 14523  | HG21 ILE E 117 | -18.851 | -3.586 | 22.970 | 1.00 | 41.23    | H0 |
| ANISOU14523 | HG21 ILE E 117 | 4500    | 6240   | 4930   | 140  | 610 190  | H0 |
| ATOM 14524  | HG22 ILE E 117 | -19.167 | -4.111 | 21.508 | 1.00 | 40.76    | H0 |
| ANISOU14524 | HG22 ILE E 117 | 4450    | 6130   | 4910   | 150  | 690 200  | H0 |

|                            |         |        |        |      |       |      |    |
|----------------------------|---------|--------|--------|------|-------|------|----|
| ATOM 14525 HG23 ILE E 117  | -20.012 | -2.915 | 22.119 | 1.00 | 40.82 | H0   |    |
| ANISOU14525 HG23 ILE E 117 | 4550    | 6150   | 4810   | 180  | 640   | 150  | H0 |
| ATOM 14526 HD11 ILE E 117  | -17.271 | -3.909 | 19.529 | 1.00 | 41.23 | H0   |    |
| ANISOU14526 HD11 ILE E 117 | 4480    | 6080   | 5100   | 70   | 820   | 190  | H0 |
| ATOM 14527 HD12 ILE E 117  | -17.897 | -3.210 | 18.248 | 1.00 | 41.05 | H0   |    |
| ANISOU14527 HD12 ILE E 117 | 4590    | 5990   | 5010   | 60   | 870   | 160  | H0 |
| ATOM 14528 HD13 ILE E 117  | -18.833 | -4.005 | 19.255 | 1.00 | 40.55 | H0   |    |
| ANISOU14528 HD13 ILE E 117 | 4490    | 6000   | 4920   | 120  | 810   | 180  | H0 |
| ATOM 14529 N ARG E 118     | -19.486 | -0.941 | 24.328 | 1.00 | 44.22 | N0   |    |
| ANISOU14529 N ARG E 118    | 5070    | 6600   | 5130   | 140  | 510   | 90   | N0 |
| ATOM 14530 CA ARG E 118    | -19.751 | -1.356 | 25.731 | 1.00 | 45.47 | C0   |    |
| ANISOU14530 CA ARG E 118   | 5200    | 6850   | 5230   | 150  | 460   | 100  | C0 |
| ATOM 14531 C ARG E 118     | -20.528 | -2.673 | 25.684 | 1.00 | 44.11 | C0   |    |
| ANISOU14531 C ARG E 118    | 4960    | 6730   | 5060   | 200  | 500   | 140  | C0 |
| ATOM 14532 O ARG E 118     | -21.567 | -2.715 | 25.004 | 1.00 | 42.92 | O0   |    |
| ANISOU14532 O ARG E 118    | 4830    | 6590   | 4890   | 250  | 550   | 120  | O0 |
| ATOM 14533 CB ARG E 118    | -20.528 | -0.284 | 26.501 | 1.00 | 47.67 | C0   |    |
| ANISOU14533 CB ARG E 118   | 5590    | 7130   | 5390   | 190  | 430   | 30   | C0 |
| ATOM 14534 CG ARG E 118    | -20.644 | -0.559 | 27.994 | 1.00 | 49.44 | C0   |    |
| ANISOU14534 CG ARG E 118   | 5810    | 7440   | 5540   | 180  | 380   | 30   | C0 |
| ATOM 14535 CD ARG E 118    | -21.746 | 0.258  | 28.635 | 1.00 | 51.79 | C0   |    |
| ANISOU14535 CD ARG E 118   | 6200    | 7760   | 5710   | 250  | 400   | -50  | C0 |
| ATOM 14536 NE ARG E 118    | -21.766 | 0.089  | 30.082 | 1.00 | 54.62 | N0   |    |
| ANISOU14536 NE ARG E 118   | 6580    | 8200   | 5970   | 230  | 360   | -50  | N0 |
| ATOM 14537 CZ ARG E 118    | -22.775 | 0.430  | 30.885 | 1.00 | 57.02 | C0   |    |
| ANISOU14537 CZ ARG E 118   | 6940    | 8570   | 6160   | 290  | 390   | -110 | C0 |
| ATOM 14538 NH1 ARG E 118   | -23.880 | 0.970  | 30.393 | 1.00 | 57.46 | N0   |    |
| ANISOU14538 NH1 ARG E 118  | 7020    | 8620   | 6190   | 390  | 450   | -170 | N0 |
| ATOM 14539 NH2 ARG E 118   | -22.675 | 0.221  | 32.189 | 1.00 | 58.09 | N0   |    |
| ANISOU14539 NH2 ARG E 118  | 7100    | 8770   | 6200   | 250  | 350   | -100 | N0 |
| ATOM 14540 H ARG E 118     | -20.219 | -0.606 | 23.902 | 1.00 | 43.99 | H0   |    |
| ANISOU14540 H ARG E 118    | 5100    | 6550   | 5060   | 180  | 530   | 60   | H0 |
| ATOM 14541 HA ARG E 118    | -18.891 | -1.509 | 26.179 | 1.00 | 45.81 | H0   |    |
| ANISOU14541 HA ARG E 118   | 5200    | 6900   | 5310   | 100  | 420   | 120  | H0 |
| ATOM 14542 HB2 ARG E 118   | -20.082 | 0.578  | 26.372 | 1.00 | 47.95 | H0   |    |
| ANISOU14542 HB2 ARG E 118  | 5690    | 7110   | 5420   | 160  | 420   | -10  | H0 |
| ATOM 14543 HB3 ARG E 118   | -21.428 | -0.217 | 26.121 | 1.00 | 47.29 | H0   |    |
| ANISOU14543 HB3 ARG E 118  | 5560    | 7090   | 5320   | 250  | 470   | 10   | H0 |
| ATOM 14544 HG2 ARG E 118   | -20.828 | -1.511 | 28.139 | 1.00 | 49.29 | H0   |    |
| ANISOU14544 HG2 ARG E 118  | 5720    | 7480   | 5530   | 190  | 400   | 80   | H0 |
| ATOM 14545 HG3 ARG E 118   | -19.792 | -0.345 | 28.431 | 1.00 | 50.06 | H0   |    |
| ANISOU14545 HG3 ARG E 118  | 5880    | 7510   | 5620   | 120  | 330   | 30   | H0 |
| ATOM 14546 HD2 ARG E 118   | -21.615 | 1.206  | 28.420 | 1.00 | 52.15 | H0   |    |
| ANISOU14546 HD2 ARG E 118  | 6330    | 7740   | 5740   | 250  | 390   | -90  | H0 |
| ATOM 14547 HD3 ARG E 118   | -22.609 | -0.021 | 28.263 | 1.00 | 51.49 | H0   |    |
| ANISOU14547 HD3 ARG E 118  | 6140    | 7760   | 5670   | 310  | 450   | -50  | H0 |
| ATOM 14548 HE ARG E 118    | -21.066 | -0.271 | 30.452 | 1.00 | 54.79 | H0   |    |
| ANISOU14548 HE ARG E 118   | 6570    | 8240   | 6010   | 170  | 310   | -10  | H0 |
| ATOM 14549 HH11 ARG E 118  | -23.956 | 1.115  | 29.531 | 1.00 | 56.76 | H0   |    |
| ANISOU14549 HH11 ARG E 118 | 6930    | 8480   | 6160   | 420  | 470   | -160 | H0 |
| ATOM 14550 HH12 ARG E 118  | -24.535 | 1.193  | 30.934 | 1.00 | 57.70 | H0   |    |
| ANISOU14550 HH12 ARG E 118 | 7080    | 8700   | 6150   | 440  | 480   | -210 | H0 |
| ATOM 14551 HH21 ARG E 118  | -21.944 | -0.142 | 32.522 | 1.00 | 58.02 | H0   |    |
| ANISOU14551 HH21 ARG E 118 | 7070    | 8770   | 6200   | 190  | 300   | -60  | H0 |



|             |      |           |         |        |        |      |       |      |    |
|-------------|------|-----------|---------|--------|--------|------|-------|------|----|
| ATOM 14552  | HH22 | ARG E 118 | -23.340 | 0.445  | 32.723 | 1.00 | 58.37 | H0   |    |
| ANISOU14552 | HH22 | ARG E 118 | 7180    | 8850   | 6150   | 290  | 380   | -140 | H0 |
| ATOM 14553  | N    | GLN E 119 | -20.034 | -3.707 | 26.368 | 1.00 | 43.83 | N0   |    |
| ANISOU14553 | N    | GLN E 119 | 4850    | 6740   | 5060   | 170  | 470   | 200  | N0 |
| ATOM 14554  | CA   | GLN E 119 | -20.635 | -5.066 | 26.335 | 1.00 | 43.64 | C0   |    |
| ANISOU14554 | CA   | GLN E 119 | 4790    | 6750   | 5040   | 190  | 500   | 260  | C0 |
| ATOM 14555  | C    | GLN E 119 | -20.377 | -5.776 | 27.668 | 1.00 | 44.27 | C0   |    |
| ANISOU14555 | C    | GLN E 119 | 4850    | 6890   | 5080   | 180  | 450   | 320  | C0 |
| ATOM 14556  | O    | GLN E 119 | -19.358 | -5.476 | 28.309 | 1.00 | 44.52 | O0   |    |
| ANISOU14556 | O    | GLN E 119 | 4870    | 6920   | 5120   | 150  | 370   | 330  | O0 |
| ATOM 14557  | CB   | GLN E 119 | -20.067 | -5.838 | 25.142 | 1.00 | 42.62 | C0   |    |
| ANISOU14557 | CB   | GLN E 119 | 4610    | 6560   | 5030   | 190  | 550   | 290  | C0 |
| ATOM 14558  | CG   | GLN E 119 | -20.871 | -7.069 | 24.752 | 1.00 | 41.79 | C0   |    |
| ANISOU14558 | CG   | GLN E 119 | 4500    | 6450   | 4930   | 200  | 610   | 320  | C0 |
| ATOM 14559  | CD   | GLN E 119 | -20.463 | -7.599 | 23.396 | 1.00 | 41.77 | C0   |    |
| ANISOU14559 | CD   | GLN E 119 | 4480    | 6370   | 5020   | 200  | 670   | 320  | C0 |
| ATOM 14560  | OE1  | GLN E 119 | -19.366 | -7.335 | 22.902 | 1.00 | 40.44 | O0   |    |
| ANISOU14560 | OE1  | GLN E 119 | 4280    | 6160   | 4920   | 200  | 680   | 320  | O0 |
| ATOM 14561  | NE2  | GLN E 119 | -21.356 | -8.356 | 22.776 | 1.00 | 41.40 | N0   |    |
| ANISOU14561 | NE2  | GLN E 119 | 4450    | 6320   | 4950   | 200  | 720   | 320  | N0 |
| ATOM 14562  | H    | GLN E 119 | -19.293 | -3.641 | 26.895 | 1.00 | 44.42 | H0   |    |
| ANISOU14562 | H    | GLN E 119 | 4910    | 6820   | 5140   | 140  | 420   | 220  | H0 |
| ATOM 14563  | HA   | GLN E 119 | -21.608 | -4.972 | 26.214 | 1.00 | 43.27 | H0   |    |
| ANISOU14563 | HA   | GLN E 119 | 4770    | 6730   | 4950   | 220  | 540   | 230  | H0 |
| ATOM 14564  | HB2  | GLN E 119 | -20.024 | -5.229 | 24.375 | 1.00 | 42.42 | H0   |    |
| ANISOU14564 | HB2  | GLN E 119 | 4600    | 6490   | 5020   | 190  | 580   | 250  | H0 |
| ATOM 14565  | HB3  | GLN E 119 | -19.152 | -6.109 | 25.357 | 1.00 | 43.00 | H0   |    |
| ANISOU14565 | HB3  | GLN E 119 | 4610    | 6590   | 5130   | 180  | 530   | 320  | H0 |
| ATOM 14566  | HG2  | GLN E 119 | -20.739 | -7.770 | 25.425 | 1.00 | 42.31 | H0   |    |
| ANISOU14566 | HG2  | GLN E 119 | 4550    | 6540   | 4990   | 200  | 590   | 370  | H0 |
| ATOM 14567  | HG3  | GLN E 119 | -21.825 | -6.841 | 24.736 | 1.00 | 41.80 | H0   |    |
| ANISOU14567 | HG3  | GLN E 119 | 4520    | 6490   | 4870   | 210  | 630   | 290  | H0 |
| ATOM 14568  | HE21 | GLN E 119 | -21.185 | -8.667 | 21.966 | 1.00 | 41.34 | H0   |    |
| ANISOU14568 | HE21 | GLN E 119 | 4450    | 6270   | 4990   | 190  | 760   | 320  | H0 |
| ATOM 14569  | HE22 | GLN E 119 | -22.122 | -8.552 | 23.170 | 1.00 | 41.45 | H0   |    |
| ANISOU14569 | HE22 | GLN E 119 | 4470    | 6370   | 4910   | 190  | 720   | 320  | H0 |
| ATOM 14570  | N    | ARG E 120 | -21.289 | -6.668 | 28.066 | 1.00 | 45.36 | N0   |    |
| ANISOU14570 | N    | ARG E 120 | 5000    | 7070   | 5170   | 180  | 480   | 350  | N0 |
| ATOM 14571  | CA   | ARG E 120 | -21.155 | -7.526 | 29.275 | 1.00 | 46.90 | C0   |    |
| ANISOU14571 | CA   | ARG E 120 | 5210    | 7300   | 5310   | 160  | 430   | 420  | C0 |
| ATOM 14572  | C    | ARG E 120 | -20.731 | -8.927 | 28.839 | 1.00 | 45.39 | C0   |    |
| ANISOU14572 | C    | ARG E 120 | 4990    | 7050   | 5210   | 160  | 450   | 510  | C0 |
| ATOM 14573  | O    | ARG E 120 | -21.225 | -9.394 | 27.790 | 1.00 | 44.06 | O0   |    |
| ANISOU14573 | O    | ARG E 120 | 4810    | 6840   | 5090   | 170  | 520   | 490  | O0 |
| ATOM 14574  | CB   | ARG E 120 | -22.456 | -7.597 | 30.081 | 1.00 | 49.68 | C0   |    |
| ANISOU14574 | CB   | ARG E 120 | 5610    | 7740   | 5530   | 140  | 470   | 410  | C0 |
| ATOM 14575  | CG   | ARG E 120 | -22.628 | -6.469 | 31.089 | 1.00 | 52.97 | C0   |    |
| ANISOU14575 | CG   | ARG E 120 | 6080    | 8230   | 5830   | 140  | 440   | 350  | C0 |
| ATOM 14576  | CD   | ARG E 120 | -23.670 | -5.464 | 30.637 | 1.00 | 54.75 | C0   |    |
| ANISOU14576 | CD   | ARG E 120 | 6310    | 8480   | 6010   | 190  | 500   | 250  | C0 |
| ATOM 14577  | NE   | ARG E 120 | -25.003 | -6.047 | 30.713 | 1.00 | 56.64 | N0   |    |
| ANISOU14577 | NE   | ARG E 120 | 6520    | 8810   | 6190   | 180  | 580   | 240  | N0 |
| ATOM 14578  | CZ   | ARG E 120 | -26.075 | -5.601 | 30.067 | 1.00 | 57.46 | C0   |    |
| ANISOU14578 | CZ   | ARG E 120 | 6590    | 8950   | 6290   | 230  | 650   | 170  | C0 |

|                            |         |         |        |      |       |     |
|----------------------------|---------|---------|--------|------|-------|-----|
| ATOM 14579 NH1 ARG E 120   | -27.233 | -6.225  | 30.219 | 1.00 | 58.28 | N0  |
| ANISOU14579 NH1 ARG E 120  | 6650    | 9160    | 6340   | 210  | 720   | 180 |
| ATOM 14580 NH2 ARG E 120   | -25.994 | -4.543  | 29.275 | 1.00 | 57.55 | N0  |
| ANISOU14580 NH2 ARG E 120  | 6610    | 8910    | 6340   | 300  | 630   | 110 |
| ATOM 14581 H ARG E 120     | -22.063 | -6.809  | 27.607 | 1.00 | 44.96 | H0  |
| ANISOU14581 H ARG E 120    | 4950    | 7030    | 5100   | 190  | 530   | 330 |
| ATOM 14582 HA ARG E 120    | -20.450 | -7.148  | 29.845 | 1.00 | 47.35 | H0  |
| ANISOU14582 HA ARG E 120   | 5270    | 7370    | 5350   | 150  | 370   | 430 |
| ATOM 14583 HB2 ARG E 120   | -23.211 | -7.582  | 29.456 | 1.00 | 49.29 | H0  |
| ANISOU14583 HB2 ARG E 120  | 5540    | 7700    | 5480   | 150  | 530   | 370 |
| ATOM 14584 HB3 ARG E 120   | -22.480 | -8.452  | 30.560 | 1.00 | 50.11 | H0  |
| ANISOU14584 HB3 ARG E 120  | 5680    | 7810    | 5560   | 120  | 470   | 470 |
| ATOM 14585 HG2 ARG E 120   | -22.899 | -6.845  | 31.954 | 1.00 | 53.39 | H0  |
| ANISOU14585 HG2 ARG E 120  | 6160    | 8330    | 5800   | 120  | 430   | 380 |
| ATOM 14586 HG3 ARG E 120   | -21.772 | -6.007  | 31.215 | 1.00 | 52.91 | H0  |
| ANISOU14586 HG3 ARG E 120  | 6070    | 8190    | 5840   | 140  | 380   | 340 |
| ATOM 14587 HD2 ARG E 120   | -23.627 | -4.666  | 31.207 | 1.00 | 55.06 | H0  |
| ANISOU14587 HD2 ARG E 120  | 6390    | 8540    | 5990   | 200  | 480   | 200 |
| ATOM 14588 HD3 ARG E 120   | -23.480 | -5.192  | 29.714 | 1.00 | 54.10 | H0  |
| ANISOU14588 HD3 ARG E 120  | 6210    | 8350    | 6000   | 210  | 510   | 230 |
| ATOM 14589 HE ARG E 120    | -25.106 | -6.748  | 31.222 | 1.00 | 56.89 | H0  |
| ANISOU14589 HE ARG E 120   | 6560    | 8870    | 6190   | 150  | 590   | 290 |
| ATOM 14590 HH11 ARG E 120  | -27.288 | -6.928  | 30.745 | 1.00 | 58.44 | H0  |
| ANISOU14590 HH11 ARG E 120 | 6670    | 9200    | 6330   | 150  | 730   | 220 |
| ATOM 14591 HH12 ARG E 120  | -27.947 | -5.935  | 29.796 | 1.00 | 58.07 | H0  |
| ANISOU14591 HH12 ARG E 120 | 6580    | 9170    | 6310   | 240  | 750   | 130 |
| ATOM 14592 HH21 ARG E 120  | -25.229 | -4.124  | 29.170 | 1.00 | 57.15 | H0  |
| ANISOU14592 HH21 ARG E 120 | 6600    | 8800    | 6320   | 300  | 590   | 110 |
| ATOM 14593 HH22 ARG E 120  | -26.713 | -4.257  | 28.853 | 1.00 | 57.30 | H0  |
| ANISOU14593 HH22 ARG E 120 | 6560    | 8910    | 6300   | 340  | 670   | 70  |
| ATOM 14594 N PHE E 121     | -19.855 | -9.561  | 29.625 | 1.00 | 44.82 | N0  |
| ANISOU14594 N PHE E 121    | 4910    | 6970    | 5150   | 170  | 370   | 580 |
| ATOM 14595 CA PHE E 121    | -19.271 | -10.894 | 29.335 | 1.00 | 44.78 | C0  |
| ANISOU14595 CA PHE E 121   | 4900    | 6880    | 5230   | 200  | 370   | 670 |
| ATOM 14596 C PHE E 121     | -19.389 | -11.800 | 30.562 | 1.00 | 46.24 | C0  |
| ANISOU14596 C PHE E 121    | 5160    | 7080    | 5330   | 190  | 310   | 770 |
| ATOM 14597 O PHE E 121     | -19.377 | -11.308 | 31.712 | 1.00 | 46.36 | O0  |
| ANISOU14597 O PHE E 121    | 5200    | 7170    | 5240   | 170  | 240   | 770 |
| ATOM 14598 CB PHE E 121    | -17.816 | -10.750 | 28.884 | 1.00 | 44.99 | C0  |
| ANISOU14598 CB PHE E 121   | 4830    | 6870    | 5390   | 250  | 320   | 680 |
| ATOM 14599 CG PHE E 121    | -17.639 | -9.866  | 27.678 | 1.00 | 43.72 | C0  |
| ANISOU14599 CG PHE E 121   | 4610    | 6690    | 5300   | 250  | 380   | 590 |
| ATOM 14600 CD1 PHE E 121   | -17.537 | -8.491  | 27.818 | 1.00 | 43.30 | C0  |
| ANISOU14600 CD1 PHE E 121  | 4550    | 6690    | 5210   | 210  | 350   | 520 |
| ATOM 14601 CD2 PHE E 121   | -17.611 | -10.407 | 26.402 | 1.00 | 43.18 | C0  |
| ANISOU14601 CD2 PHE E 121  | 4530    | 6550    | 5330   | 270  | 470   | 580 |
| ATOM 14602 CE1 PHE E 121   | -17.387 | -7.676  | 26.709 | 1.00 | 42.49 | C0  |
| ANISOU14602 CE1 PHE E 121  | 4430    | 6550    | 5160   | 190  | 410   | 450 |
| ATOM 14603 CE2 PHE E 121   | -17.455 | -9.591  | 25.294 | 1.00 | 42.08 | C0  |
| ANISOU14603 CE2 PHE E 121  | 4360    | 6390    | 5240   | 250  | 530   | 510 |
| ATOM 14604 CZ PHE E 121    | -17.347 | -8.229  | 25.449 | 1.00 | 42.10 | C0  |
| ANISOU14604 CZ PHE E 121   | 4360    | 6440    | 5200   | 220  | 500   | 450 |
| ATOM 14605 H PHE E 121     | -19.547 | -9.212  | 30.408 | 1.00 | 45.55 | H0  |
| ANISOU14605 H PHE E 121    | 5020    | 7100    | 5190   | 160  | 310   | 590 |

|                           |         |         |        |      |       |      |    |
|---------------------------|---------|---------|--------|------|-------|------|----|
| ATOM 14606 HA PHE E 121   | -19.786 | -11.307 | 28.597 | 1.00 | 44.48 | H0   |    |
| ANISOU14606 HA PHE E 121  | 4870    | 6810    | 5220   | 200  | 440   | 660  | H0 |
| ATOM 14607 HB2 PHE E 121  | -17.295 | -10.382 | 29.627 | 1.00 | 45.50 | H0   |    |
| ANISOU14607 HB2 PHE E 121 | 4870    | 6980    | 5430   | 250  | 240   | 690  | H0 |
| ATOM 14608 HB3 PHE E 121  | -17.463 | -11.641 | 28.681 | 1.00 | 45.32 | H0   |    |
| ANISOU14608 HB3 PHE E 121 | 4860    | 6860    | 5500   | 290  | 330   | 730  | H0 |
| ATOM 14609 HD1 PHE E 121  | -17.563 | -8.108  | 28.681 | 1.00 | 43.66 | H0   |    |
| ANISOU14609 HD1 PHE E 121 | 4620    | 6780    | 5190   | 190  | 300   | 520  | H0 |
| ATOM 14610 HD2 PHE E 121  | -17.682 | -11.342 | 26.290 | 1.00 | 43.33 | H0   |    |
| ANISOU14610 HD2 PHE E 121 | 4570    | 6520    | 5370   | 290  | 500   | 620  | H0 |
| ATOM 14611 HE1 PHE E 121  | -17.310 | -6.742  | 26.818 | 1.00 | 42.56 | H0   |    |
| ANISOU14611 HE1 PHE E 121 | 4450    | 6580    | 5140   | 170  | 390   | 410  | H0 |
| ATOM 14612 HE2 PHE E 121  | -17.428 | -9.969  | 24.433 | 1.00 | 42.09 | H0   |    |
| ANISOU14612 HE2 PHE E 121 | 4360    | 6340    | 5290   | 270  | 600   | 500  | H0 |
| ATOM 14613 HZ PHE E 121   | -17.244 | -7.676  | 24.693 | 1.00 | 41.79 | H0   |    |
| ANISOU14613 HZ PHE E 121  | 4320    | 6380    | 5180   | 200  | 540   | 410  | H0 |
| ATOM 14614 N SER E 122    | -19.529 | -13.098 | 30.293 | 1.00 | 46.80 | N0   |    |
| ANISOU14614 N SER E 122   | 5270    | 7070    | 5440   | 200  | 350   | 830  | N0 |
| ATOM 14615 CA SER E 122   | -19.379 | -14.205 | 31.265 | 1.00 | 48.49 | C0   |    |
| ANISOU14615 CA SER E 122  | 5580    | 7240    | 5600   | 210  | 300   | 950  | C0 |
| ATOM 14616 C SER E 122    | -17.940 | -14.723 | 31.168 | 1.00 | 49.72 | C0   |    |
| ANISOU14616 C SER E 122   | 5680    | 7330    | 5880   | 320  | 210   | 1020 | C0 |
| ATOM 14617 O SER E 122    | -17.554 | -15.203 | 30.080 | 1.00 | 49.59 | O0   |    |
| ANISOU14617 O SER E 122   | 5620    | 7220    | 6000   | 370  | 270   | 1000 | O0 |
| ATOM 14618 CB SER E 122   | -20.399 | -15.287 | 31.003 | 1.00 | 48.23 | C0   |    |
| ANISOU14618 CB SER E 122  | 5650    | 7140    | 5530   | 150  | 390   | 980  | C0 |
| ATOM 14619 OG SER E 122   | -20.170 | -16.411 | 31.833 | 1.00 | 49.42 | O0   |    |
| ANISOU14619 OG SER E 122  | 5910    | 7220    | 5640   | 160  | 340   | 1110 | O0 |
| ATOM 14620 H SER E 122    | -19.730 | -13.405 | 29.459 | 1.00 | 46.40 | H0   |    |
| ANISOU14620 H SER E 122   | 5210    | 6970    | 5450   | 210  | 420   | 810  | H0 |
| ATOM 14621 HA SER E 122   | -19.526 | -13.843 | 32.179 | 1.00 | 48.81 | H0   |    |
| ANISOU14621 HA SER E 122  | 5650    | 7350    | 5540   | 180  | 250   | 960  | H0 |
| ATOM 14622 HB2 SER E 122  | -21.301 | -14.933 | 31.172 | 1.00 | 47.92 | H0   |    |
| ANISOU14622 HB2 SER E 122 | 5620    | 7170    | 5410   | 80   | 440   | 940  | H0 |
| ATOM 14623 HB3 SER E 122  | -20.349 | -15.562 | 30.059 | 1.00 | 47.82 | H0   |    |
| ANISOU14623 HB3 SER E 122 | 5570    | 7030    | 5570   | 170  | 440   | 960  | H0 |
| ATOM 14624 N CYS E 123    | -17.163 | -14.587 | 32.244 | 1.00 | 50.91 | N0   |    |
| ANISOU14624 N CYS E 123   | 5820    | 7530    | 5990   | 350  | 70    | 1080 | N0 |
| ATOM 14625 CA CYS E 123   | -15.732 | -14.986 | 32.295 | 1.00 | 52.73 | C0   |    |
| ANISOU14625 CA CYS E 123  | 5970    | 7720    | 6340   | 470  | -30   | 1140 | C0 |
| ATOM 14626 C CYS E 123    | -15.249 | -15.023 | 33.751 | 1.00 | 53.46 | C0   |    |
| ANISOU14626 C CYS E 123   | 6110    | 7880    | 6330   | 480  | -200  | 1230 | C0 |
| ATOM 14627 O CYS E 123    | -16.003 | -14.571 | 34.639 | 1.00 | 53.34 | O0   |    |
| ANISOU14627 O CYS E 123   | 6180    | 7940    | 6140   | 390  | -210  | 1230 | O0 |
| ATOM 14628 CB CYS E 123   | -14.881 | -14.043 | 31.449 | 1.00 | 52.99 | C0   |    |
| ANISOU14628 CB CYS E 123  | 5830    | 7800    | 6500   | 500  | -30   | 1050 | C0 |
| ATOM 14629 SG CYS E 123   | -14.994 | -12.312 | 31.971 | 1.00 | 54.22 | S0   |    |
| ANISOU14629 SG CYS E 123  | 5940    | 8100    | 6560   | 390  | -80   | 950  | S0 |
| ATOM 14630 H CYS E 123    | -17.456 | -14.234 | 33.031 | 1.00 | 51.27 | H0   |    |
| ANISOU14630 H CYS E 123   | 5910    | 7640    | 5930   | 310  | 40    | 1080 | H0 |
| ATOM 14631 HA CYS E 123   | -15.657 | -15.893 | 31.918 | 1.00 | 53.01 | H0   |    |
| ANISOU14631 HA CYS E 123  | 6040    | 7660    | 6440   | 520  | 0     | 1190 | H0 |
| ATOM 14632 HB2 CYS E 123  | -13.945 | -14.323 | 31.501 | 1.00 | 54.15 | H0   |    |
| ANISOU14632 HB2 CYS E 123 | 5900    | 7940    | 6730   | 570  | -100  | 1090 | H0 |

|             |                |         |         |        |      |       |      |    |
|-------------|----------------|---------|---------|--------|------|-------|------|----|
| ATOM 14633  | HB3 CYS E 123  | -15.164 | -14.106 | 30.514 | 1.00 | 52.38 | H0   |    |
| ANISOU14633 | HB3 CYS E 123  | 5740    | 7680    | 6490   | 490  | 70    | 1000 | H0 |
| ATOM 14634  | N ASP E 124    | -14.042 | -15.551 | 33.984 | 1.00 | 54.46 | N0   |    |
| ANISOU14634 | N ASP E 124    | 6160    | 7990    | 6540   | 600  | -320  | 1310 | N0 |
| ATOM 14635  | CA ASP E 124   | -13.472 | -15.755 | 35.344 | 1.00 | 55.62 | C0   |    |
| ANISOU14635 | CA ASP E 124   | 6360    | 8190    | 6590   | 640  | -510  | 1420 | C0 |
| ATOM 14636  | C ASP E 124    | -13.154 | -14.384 | 35.951 | 1.00 | 55.50 | C0   |    |
| ANISOU14636 | C ASP E 124    | 6260    | 8330    | 6500   | 550  | -600  | 1350 | C0 |
| ATOM 14637  | O ASP E 124    | -12.257 | -13.698 | 35.427 | 1.00 | 56.13 | O0   |    |
| ANISOU14637 | O ASP E 124    | 6160    | 8470    | 6700   | 580  | -630  | 1280 | O0 |
| ATOM 14638  | CB ASP E 124   | -12.241 | -16.667 | 35.315 | 1.00 | 56.98 | C0   |    |
| ANISOU14638 | CB ASP E 124   | 6450    | 8300    | 6900   | 810  | -620  | 1520 | C0 |
| ATOM 14639  | CG ASP E 124   | -11.924 | -17.347 | 36.640 | 1.00 | 58.93 | C0   |    |
| ANISOU14639 | CG ASP E 124   | 6820    | 8550    | 7030   | 870  | -800  | 1670 | C0 |
| ATOM 14640  | OD1 ASP E 124  | -12.560 | -16.997 | 37.661 | 1.00 | 58.45 | O0   |    |
| ANISOU14640 | OD1 ASP E 124  | 6890    | 8550    | 6760   | 750  | -840  | 1690 | O0 |
| ATOM 14641  | OD2 ASP E 124  | -11.040 | -18.228 | 36.643 | 1.00 | 60.43 | O0   |    |
| ANISOU14641 | OD2 ASP E 124  | 6970    | 8670    | 7320   | 1030 | -890  | 1760 | O0 |
| ATOM 14642  | H ASP E 124    | -13.489 | -15.817 | 33.310 | 1.00 | 54.51 | H0   |    |
| ANISOU14642 | H ASP E 124    | 6090    | 7950    | 6680   | 680  | -300  | 1310 | H0 |
| ATOM 14643  | HA ASP E 124   | -14.162 | -16.189 | 35.898 | 1.00 | 55.92 | H0   |    |
| ANISOU14643 | HA ASP E 124   | 6540    | 8200    | 6510   | 590  | -490  | 1470 | H0 |
| ATOM 14644  | HB2 ASP E 124  | -12.378 | -17.363 | 34.641 | 1.00 | 56.87 | H0   |    |
| ANISOU14644 | HB2 ASP E 124  | 6460    | 8180    | 6960   | 870  | -530  | 1530 | H0 |
| ATOM 14645  | HB3 ASP E 124  | -11.460 | -16.140 | 35.050 | 1.00 | 57.17 | H0   |    |
| ANISOU14645 | HB3 ASP E 124  | 6310    | 8390    | 7010   | 840  | -670  | 1470 | H0 |
| ATOM 14646  | N VAL E 125    | -13.881 | -14.000 | 37.003 | 1.00 | 55.64 | N0   |    |
| ANISOU14646 | N VAL E 125    | 6420    | 8410    | 6310   | 450  | -630  | 1350 | N0 |
| ATOM 14647  | CA VAL E 125   | -13.662 | -12.737 | 37.769 | 1.00 | 55.68 | C0   |    |
| ANISOU14647 | CA VAL E 125   | 6400    | 8550    | 6210   | 370  | -730  | 1280 | C0 |
| ATOM 14648  | C VAL E 125    | -12.924 | -13.060 | 39.074 | 1.00 | 57.65 | C0   |    |
| ANISOU14648 | C VAL E 125    | 6700    | 8860    | 6350   | 400  | -940  | 1390 | C0 |
| ATOM 14649  | O VAL E 125    | -12.455 | -12.113 | 39.724 | 1.00 | 57.95 | O0   |    |
| ANISOU14649 | O VAL E 125    | 6700    | 9010    | 6310   | 330  | -1060 | 1340 | O0 |
| ATOM 14650  | CB VAL E 125   | -14.997 | -12.012 | 38.017 | 1.00 | 54.74 | C0   |    |
| ANISOU14650 | CB VAL E 125   | 6400    | 8470    | 5930   | 250  | -600  | 1190 | C0 |
| ATOM 14651  | CG1 VAL E 125  | -14.830 | -10.764 | 38.875 | 1.00 | 55.29 | C0   |    |
| ANISOU14651 | CG1 VAL E 125  | 6490    | 8650    | 5860   | 160  | -690  | 1110 | C0 |
| ATOM 14652  | CG2 VAL E 125  | -15.685 | -11.668 | 36.704 | 1.00 | 52.79 | C0   |    |
| ANISOU14652 | CG2 VAL E 125  | 6100    | 8170    | 5790   | 230  | -420  | 1090 | C0 |
| ATOM 14653  | H VAL E 125    | -14.582 | -14.490 | 37.316 | 1.00 | 55.67 | H0   |    |
| ANISOU14653 | H VAL E 125    | 6550    | 8380    | 6230   | 430  | -590  | 1390 | H0 |
| ATOM 14654  | HA VAL E 125   | -13.093 | -12.153 | 37.236 | 1.00 | 55.35 | H0   |    |
| ANISOU14654 | HA VAL E 125   | 6220    | 8540    | 6270   | 370  | -730  | 1220 | H0 |
| ATOM 14655  | HB VAL E 125   | -15.585 | -12.637 | 38.508 | 1.00 | 55.15 | H0   |    |
| ANISOU14655 | HB VAL E 125   | 6580    | 8490    | 5880   | 230  | -580  | 1250 | H0 |
| ATOM 14656  | HG11 VAL E 125 | -14.754 | -11.018 | 39.811 | 1.00 | 56.49 | H0   |    |
| ANISOU14656 | HG11 VAL E 125 | 6730    | 8840    | 5890   | 150  | -780  | 1180 | H0 |
| ATOM 14657  | HG12 VAL E 125 | -15.604 | -10.186 | 38.761 | 1.00 | 54.39 | H0   |    |
| ANISOU14657 | HG12 VAL E 125 | 6420    | 8550    | 5690   | 110  | -590  | 1030 | H0 |
| ATOM 14658  | HG13 VAL E 125 | -14.027 | -10.286 | 38.602 | 1.00 | 55.41 | H0   |    |
| ANISOU14658 | HG13 VAL E 125 | 6390    | 8690    | 5970   | 170  | -760  | 1080 | H0 |
| ATOM 14659  | HG21 VAL E 125 | -15.057 | -11.211 | 36.119 | 1.00 | 52.45 | H0   |    |
| ANISOU14659 | HG21 VAL E 125 | 5940    | 8130    | 5860   | 250  | -430  | 1040 | H0 |

|                            |         |         |        |      |       |      |    |
|----------------------------|---------|---------|--------|------|-------|------|----|
| ATOM 14660 HG22 VAL E 125  | -16.448 | -11.088 | 36.876 | 1.00 | 52.21 | H0   |    |
| ANISOU14660 HG22 VAL E 125 | 6080    | 8130    | 5620   | 170  | -350  | 1020 | H0 |
| ATOM 14661 HG23 VAL E 125  | -15.991 | -12.485 | 36.274 | 1.00 | 52.55 | H0   |    |
| ANISOU14661 HG23 VAL E 125 | 6090    | 8070    | 5810   | 260  | -350  | 1130 | H0 |
| ATOM 14662 N SER E 126     | -12.809 | -14.343 | 39.435 | 1.00 | 59.18 | N0   |    |
| ANISOU14662 N SER E 126    | 6980    | 8970    | 6530   | 490  | -990  | 1530 | N0 |
| ATOM 14663 CA SER E 126    | -12.122 | -14.809 | 40.670 | 1.00 | 61.87 | C0   |    |
| ANISOU14663 CA SER E 126   | 7390    | 9360    | 6760   | 540  | -1210 | 1670 | C0 |
| ATOM 14664 C SER E 126     | -10.686 | -14.274 | 40.685 | 1.00 | 63.32 | C0   |    |
| ANISOU14664 C SER E 126    | 7350    | 9650    | 7060   | 600  | -1400 | 1650 | C0 |
| ATOM 14665 O SER E 126     | -9.992  | -14.436 | 39.664 | 1.00 | 63.09 | O0   |    |
| ANISOU14665 O SER E 126    | 7130    | 9590    | 7250   | 700  | -1360 | 1620 | O0 |
| ATOM 14666 CB SER E 126    | -12.147 | -16.313 | 40.793 | 1.00 | 63.16 | C0   |    |
| ANISOU14666 CB SER E 126   | 7690    | 9380    | 6930   | 650  | -1230 | 1820 | C0 |
| ATOM 14667 OG SER E 126    | -11.221 | -16.913 | 39.901 | 1.00 | 63.59 | O0   |    |
| ANISOU14667 OG SER E 126   | 7580    | 9360    | 7220   | 820  | -1250 | 1850 | O0 |
| ATOM 14668 H SER E 126     | -13.144 | -15.033 | 38.947 | 1.00 | 58.80 | H0   |    |
| ANISOU14668 H SER E 126    | 6970    | 8830    | 6540   | 530  | -910  | 1570 | H0 |
| ATOM 14669 HA SER E 126    | -12.605 | -14.426 | 41.446 | 1.00 | 62.11 | H0   |    |
| ANISOU14669 HA SER E 126   | 7540    | 9440    | 6610   | 440  | -1230 | 1660 | H0 |
| ATOM 14670 HB2 SER E 126   | -11.924 | -16.568 | 41.717 | 1.00 | 64.75 | H0   |    |
| ANISOU14670 HB2 SER E 126  | 7980    | 9610    | 7010   | 660  | -1360 | 1910 | H0 |
| ATOM 14671 HB3 SER E 126   | -13.053 | -16.643 | 40.596 | 1.00 | 62.32 | H0   |    |
| ANISOU14671 HB3 SER E 126  | 7700    | 9200    | 6780   | 600  | -1090 | 1820 | H0 |
| ATOM 14672 N GLY E 127     | -10.282 | -13.642 | 41.793 | 1.00 | 65.05 | N0   |    |
| ANISOU14672 N GLY E 127    | 7600    | 9990    | 7120   | 530  | -1580 | 1650 | N0 |
| ATOM 14673 CA GLY E 127    | -8.913  | -13.147 | 42.037 | 1.00 | 66.76 | C0   |    |
| ANISOU14673 CA GLY E 127   | 7610    | 10340   | 7420   | 560  | -1790 | 1650 | C0 |
| ATOM 14674 C GLY E 127     | -8.770  | -11.654 | 41.784 | 1.00 | 65.93 | C0   |    |
| ANISOU14674 C GLY E 127    | 7390    | 10340   | 7320   | 410  | -1760 | 1480 | C0 |
| ATOM 14675 O GLY E 127     | -7.646  | -11.149 | 41.921 | 1.00 | 67.13 | O0   |    |
| ANISOU14675 O GLY E 127    | 7360    | 10610   | 7540   | 400  | -1920 | 1450 | O0 |
| ATOM 14676 H GLY E 127     | -10.853 | -13.478 | 42.484 | 1.00 | 65.14 | H0   |    |
| ANISOU14676 H GLY E 127    | 7760    | 10030   | 6970   | 450  | -1580 | 1660 | H0 |
| ATOM 14677 HA2 GLY E 127   | -8.666  | -13.342 | 42.976 | 1.00 | 68.44 | H0   |    |
| ANISOU14677 HA2 GLY E 127  | 7900    | 10600   | 7500   | 570  | -1940 | 1720 | H0 |
| ATOM 14678 HA3 GLY E 127   | -8.284  | -13.638 | 41.451 | 1.00 | 67.15 | H0   |    |
| ANISOU14678 HA3 GLY E 127  | 7520    | 10360   | 7640   | 680  | -1800 | 1680 | H0 |
| ATOM 14679 N VAL E 128     | -9.861  | -10.956 | 41.452 | 1.00 | 64.22 | N0   |    |
| ANISOU14679 N VAL E 128    | 7280    | 10080   | 7040   | 300  | -1570 | 1360 | N0 |
| ATOM 14680 CA VAL E 128    | -9.833  | -9.526  | 41.016 | 1.00 | 63.30 | C0   |    |
| ANISOU14680 CA VAL E 128   | 7090    | 10020   | 6950   | 170  | -1510 | 1200 | C0 |
| ATOM 14681 C VAL E 128     | -9.300  | -8.636  | 42.148 | 1.00 | 65.42 | C0   |    |
| ANISOU14681 C VAL E 128    | 7390    | 10410   | 7050   | 50   | -1700 | 1160 | C0 |
| ATOM 14682 O VAL E 128     | -8.641  | -7.635  | 41.828 | 1.00 | 65.41 | O0   |    |
| ANISOU14682 O VAL E 128    | 7250    | 10470   | 7130   | -30  | -1740 | 1060 | O0 |
| ATOM 14683 CB VAL E 128    | -11.216 | -9.053  | 40.529 | 1.00 | 61.20 | C0   |    |
| ANISOU14683 CB VAL E 128   | 6960    | 9670    | 6620   | 100  | -1270 | 1100 | C0 |
| ATOM 14684 CG1 VAL E 128   | -12.220 | -8.938  | 41.668 | 1.00 | 61.71 | C0   |    |
| ANISOU14684 CG1 VAL E 128  | 7270    | 9760    | 6420   | 30   | -1260 | 1100 | C0 |
| ATOM 14685 CG2 VAL E 128   | -11.119 | -7.743  | 39.763 | 1.00 | 59.99 | C0   |    |
| ANISOU14685 CG2 VAL E 128  | 6720    | 9530    | 6540   | 10   | -1190 | 950  | C0 |
| ATOM 14686 H VAL E 128     | -10.698 | -11.313 | 41.473 | 1.00 | 63.43 | H0   |    |
| ANISOU14686 H VAL E 128    | 7320    | 9920    | 6870   | 300  | -1460 | 1380 | H0 |

|                            |         |         |        |      |       |      |    |
|----------------------------|---------|---------|--------|------|-------|------|----|
| ATOM 14687 HA VAL E 128    | -9.214  | -9.459  | 40.268 | 1.00 | 63.18 |      | H0 |
| ANISOU14687 HA VAL E 128   | 6910    | 10000   | 7100   | 200  | -1490 | 1170 | H0 |
| ATOM 14688 HB VAL E 128    | -11.555 | -9.737  | 39.903 | 1.00 | 60.34 |      | H0 |
| ANISOU14688 HB VAL E 128   | 6840    | 9490    | 6600   | 170  | -1170 | 1140 | H0 |
| ATOM 14689 HG11 VAL E 128  | -12.021 | -9.604  | 42.349 | 1.00 | 62.94 |      | H0 |
| ANISOU14689 HG11 VAL E 128 | 7480    | 9930    | 6500   | 70   | -1370 | 1200 | H0 |
| ATOM 14690 HG12 VAL E 128  | -13.119 | -9.086  | 41.325 | 1.00 | 60.47 |      | H0 |
| ANISOU14690 HG12 VAL E 128 | 7180    | 9550    | 6250   | 30   | -1110 | 1080 | H0 |
| ATOM 14691 HG13 VAL E 128  | -12.168 | -8.049  | 42.059 | 1.00 | 61.96 |      | H0 |
| ANISOU14691 HG13 VAL E 128 | 7330    | 9850    | 6370   | -50  | -1300 | 1020 | H0 |
| ATOM 14692 HG21 VAL E 128  | -10.909 | -7.020  | 40.379 | 1.00 | 60.80 |      | H0 |
| ANISOU14692 HG21 VAL E 128 | 6860    | 9690    | 6550   | -70  | -1280 | 900  | H0 |
| ATOM 14693 HG22 VAL E 128  | -11.969 | -7.559  | 39.326 | 1.00 | 58.64 |      | H0 |
| ANISOU14693 HG22 VAL E 128 | 6620    | 9300    | 6360   | 0    | -1050 | 890  | H0 |
| ATOM 14694 HG23 VAL E 128  | -10.418 | -7.810  | 39.092 | 1.00 | 60.02 |      | H0 |
| ANISOU14694 HG23 VAL E 128 | 6570    | 9530    | 6700   | 50   | -1200 | 950  | H0 |
| ATOM 14695 N ASP E 129     | -9.568  | -8.978  | 43.414 | 1.00 | 67.63 |      | N0 |
| ANISOU14695 N ASP E 129    | 7850    | 10730   | 7110   | 40   | -1820 | 1240 | N0 |
| ATOM 14696 CA ASP E 129    | -9.164  | -8.169  | 44.599 | 1.00 | 69.90 |      | C0 |
| ANISOU14696 CA ASP E 129   | 8220    | 11140   | 7200   | -80  | -2010 | 1200 | C0 |
| ATOM 14697 C ASP E 129     | -7.783  | -8.610  | 45.106 | 1.00 | 72.45 |      | C0 |
| ANISOU14697 C ASP E 129    | 8380    | 11570   | 7570   | -20  | -2290 | 1300 | C0 |
| ATOM 14698 O ASP E 129     | -7.323  | -8.017  | 46.105 | 1.00 | 74.16 |      | O0 |
| ANISOU14698 O ASP E 129    | 8650    | 11900   | 7630   | -130 | -2480 | 1280 | O0 |
| ATOM 14699 CB ASP E 129    | -10.205 | -8.251  | 45.722 | 1.00 | 71.00 |      | C0 |
| ANISOU14699 CB ASP E 129   | 8650    | 11270   | 7050   | -140 | -1980 | 1220 | C0 |
| ATOM 14700 CG ASP E 129    | -11.494 | -7.494  | 45.441 | 1.00 | 69.79 |      | C0 |
| ANISOU14700 CG ASP E 129   | 8630    | 11060   | 6820   | -220 | -1740 | 1080 | C0 |
| ATOM 14701 OD1 ASP E 129   | -11.742 | -7.159  | 44.266 | 1.00 | 68.94 |      | O0 |
| ANISOU14701 OD1 ASP E 129  | 8410    | 10890   | 6890   | -200 | -1580 | 1000 | O0 |
| ATOM 14702 OD2 ASP E 129   | -12.247 | -7.248  | 46.402 | 1.00 | 71.21 |      | O0 |
| ANISOU14702 OD2 ASP E 129  | 9030    | 11270   | 6750   | -290 | -1710 | 1060 | O0 |
| ATOM 14703 H ASP E 129     | -10.024 | -9.736  | 43.630 | 1.00 | 67.58 |      | H0 |
| ANISOU14703 H ASP E 129    | 7950    | 10680   | 7050   | 90   | -1790 | 1320 | H0 |
| ATOM 14704 HA ASP E 129    | -9.101  | -7.227  | 44.317 | 1.00 | 69.38 |      | H0 |
| ANISOU14704 HA ASP E 129   | 8110    | 11090   | 7160   | -170 | -1970 | 1080 | H0 |
| ATOM 14705 HB2 ASP E 129   | -10.429 | -9.191  | 45.880 | 1.00 | 71.33 |      | H0 |
| ANISOU14705 HB2 ASP E 129  | 8750    | 11280   | 7070   | -60  | -1980 | 1330 | H0 |
| ATOM 14706 HB3 ASP E 129   | -9.817  | -7.890  | 46.544 | 1.00 | 72.57 |      | H0 |
| ANISOU14706 HB3 ASP E 129  | 8900    | 11550   | 7120   | -210 | -2130 | 1210 | H0 |
| ATOM 14707 N THR E 130     | -7.148  | -9.595  | 44.452 | 1.00 | 72.57 |      | N0 |
| ANISOU14707 N THR E 130    | 8220    | 11550   | 7800   | 140  | -2310 | 1410 | N0 |
| ATOM 14708 CA THR E 130    | -5.791  | -10.113 | 44.794 | 1.00 | 75.07 |      | C0 |
| ANISOU14708 CA THR E 130   | 8340    | 11980   | 8210   | 250  | -2570 | 1510 | C0 |
| ATOM 14709 C THR E 130     | -4.737  | -9.436  | 43.905 | 1.00 | 75.11 |      | C0 |
| ANISOU14709 C THR E 130    | 8020    | 12070   | 8450   | 220  | -2590 | 1410 | C0 |
| ATOM 14710 O THR E 130     | -5.131  | -8.726  | 42.955 | 1.00 | 73.00 |      | O0 |
| ANISOU14710 O THR E 130    | 7720    | 11740   | 8270   | 130  | -2380 | 1280 | O0 |
| ATOM 14711 CB THR E 130    | -5.724  | -11.644 | 44.692 | 1.00 | 75.74 |      | C0 |
| ANISOU14711 CB THR E 130   | 8440    | 11970   | 8370   | 470  | -2590 | 1690 | C0 |
| ATOM 14712 OG1 THR E 130   | -5.855  | -12.032 | 43.324 | 1.00 | 73.38 |      | O0 |
| ANISOU14712 OG1 THR E 130  | 8010    | 11560   | 8310   | 560  | -2380 | 1660 | O0 |
| ATOM 14713 CG2 THR E 130   | -6.784  | -12.334 | 45.523 | 1.00 | 75.96 |      | C0 |
| ANISOU14713 CG2 THR E 130  | 8800    | 11900   | 8160   | 470  | -2560 | 1790 | C0 |

|                            |                       |                 |    |
|----------------------------|-----------------------|-----------------|----|
| ATOM 14714 H THR E 130     | -7.509 -10.032 43.743 | 1.00 71.27      | H0 |
| ANISOU14714 H THR E 130    | 8040 11300 7740       | 210 -2170 1420  | H0 |
| ATOM 14715 HA THR E 130    | -5.605 -9.864 45.729  | 1.00 76.60      | H0 |
| ANISOU14715 HA THR E 130   | 8620 12250 8240       | 180 -2730 1530  | H0 |
| ATOM 14716 HB THR E 130    | -4.838 -11.932 45.016 | 1.00 77.68      | H0 |
| ANISOU14716 HB THR E 130   | 8570 12290 8660       | 540 -2780 1750  | H0 |
| ATOM 14717 HG21 THR E 130  | -6.751 -11.999 46.437 | 1.00 77.12      | H0 |
| ANISOU14717 HG21 THR E 130 | 9050 12120 8130       | 390 -2680 1790  | H0 |
| ATOM 14718 HG22 THR E 130  | -6.621 -13.295 45.525 | 1.00 76.73      | H0 |
| ANISOU14718 HG22 THR E 130 | 8920 11940 8300       | 610 -2600 1910  | H0 |
| ATOM 14719 HG23 THR E 130  | -7.663 -12.156 45.144 | 1.00 74.03      | H0 |
| ANISOU14719 HG23 THR E 130 | 8650 11580 7890       | 410 -2360 1730  | H0 |
| ATOM 14720 N GLU E 131     | -3.455 -9.660 44.218  | 1.00 77.56      | N0 |
| ANISOU14720 N GLU E 131    | 8110 12520 8840       | 280 -2830 1480  | N0 |
| ATOM 14721 CA GLU E 131    | -2.271 -9.019 43.579  | 1.00 78.37      | C0 |
| ANISOU14721 CA GLU E 131   | 7870 12750 9150       | 230 -2890 1390  | C0 |
| ATOM 14722 C GLU E 131     | -2.047 -9.608 42.181  | 1.00 76.90      | C0 |
| ANISOU14722 C GLU E 131    | 7480 12490 9250       | 380 -2700 1390  | C0 |
| ATOM 14723 O GLU E 131     | -1.609 -8.852 41.287  | 1.00 76.06      | O0 |
| ANISOU14723 O GLU E 131    | 7180 12430 9300       | 280 -2590 1280  | O0 |
| ATOM 14724 CB GLU E 131    | -1.036 -9.220 44.460  | 1.00 82.25      | C0 |
| ANISOU14724 CB GLU E 131   | 8180 13440 9630       | 270 -3220 1470  | C0 |
| ATOM 14725 CG GLU E 131    | 0.202 -8.482 43.976   | 1.00 83.98      | C0 |
| ANISOU14725 CG GLU E 131   | 8040 13830 10040      | 180 -3310 1380  | C0 |
| ATOM 14726 CD GLU E 131    | 1.514 -9.060 44.481   | 1.00 87.93      | C0 |
| ANISOU14726 CD GLU E 131   | 8260 14520 10620      | 310 -3610 1490  | C0 |
| ATOM 14727 OE1 GLU E 131   | 1.562 -9.477 45.657   | 1.00 90.02      | O0 |
| ANISOU14727 OE1 GLU E 131  | 8660 14840 10700      | 360 -3850 1590  | O0 |
| ATOM 14728 OE2 GLU E 131   | 2.483 -9.103 43.694   | 1.00 89.10      | O0 |
| ANISOU14728 OE2 GLU E 131  | 8060 14770 11020      | 370 -3600 1460  | O0 |
| ATOM 14729 H GLU E 131     | -3.222 -10.247 44.874 | 1.00 79.15      | H0 |
| ANISOU14729 H GLU E 131    | 8350 12750 8970       | 360 -2980 1580  | H0 |
| ATOM 14730 HA GLU E 131    | -2.449 -8.054 43.492  | 1.00 77.64      | H0 |
| ANISOU14730 HA GLU E 131   | 7810 12680 9010       | 60 -2830 1280   | H0 |
| ATOM 14731 HB2 GLU E 131   | -1.249 -8.918 45.368  | 1.00 83.02      | H0 |
| ANISOU14731 HB2 GLU E 131  | 8440 13570 9530       | 180 -3340 1480  | H0 |
| ATOM 14732 HB3 GLU E 131   | -0.837 -10.179 44.502 | 1.00 83.09      | H0 |
| ANISOU14732 HB3 GLU E 131  | 8260 13520 9790       | 450 -3280 1590  | H0 |
| ATOM 14733 HG2 GLU E 131   | 0.220 -8.490 42.997   | 1.00 82.71      | H0 |
| ANISOU14733 HG2 GLU E 131  | 7760 13620 10050      | 210 -3130 1340  | H0 |
| ATOM 14734 HG3 GLU E 131   | 0.146 -7.546 44.262   | 1.00 83.97      | H0 |
| ANISOU14734 HG3 GLU E 131  | 8090 13880 9930       | -10 -3330 1280  | H0 |
| ATOM 14735 N SER E 132     | -2.311 -10.907 42.007 | 1.00 76.67      | N0 |
| ANISOU14735 N SER E 132    | 7510 12340 9270       | 600 -2650 1520  | N0 |
| ATOM 14736 CA SER E 132    | -2.216 -11.629 40.710 | 1.00 75.85      | C0 |
| ANISOU14736 CA SER E 132   | 7270 12130 9410       | 760 -2460 1530  | C0 |
| ATOM 14737 C SER E 132     | -3.361 -11.188 39.784 | 1.00 72.40      | C0 |
| ANISOU14737 C SER E 132    | 6980 11550 8970       | 660 -2160 1420  | C0 |
| ATOM 14738 O SER E 132     | -3.154 -11.148 38.551 | 1.00 71.13      | O0 |
| ANISOU14738 O SER E 132    | 6670 11350 9010       | 690 -1980 1360  | O0 |
| ATOM 14739 CB SER E 132    | -2.223 -13.121 40.923 | 1.00 77.26      | C0 |
| ANISOU14739 CB SER E 132   | 7530 12210 9620       | 1010 -2510 1700 | C0 |
| ATOM 14740 OG SER E 132    | -3.522 -13.571 41.284 | 1.00 76.26      | O0 |
| ANISOU14740 OG SER E 132   | 7750 11920 9310       | 1000 -2410 1750 | O0 |

|                           |                        |                 |    |
|---------------------------|------------------------|-----------------|----|
| ATOM 14741 H SER E 132    | -2.568 -11.456 42.687  | 1.00 77.47      | H0 |
| ANISOU14741 H SER E 132   | 7760 12420 9260        | 660 -2740 1610  | H0 |
| ATOM 14742 HA SER E 132   | -1.355 -11.377 40.280  | 1.00 76.75      | H0 |
| ANISOU14742 HA SER E 132  | 7140 12350 9680        | 770 -2490 1490  | H0 |
| ATOM 14743 HB2 SER E 132  | -1.937 -13.571 40.096  | 1.00 77.14      | H0 |
| ANISOU14743 HB2 SER E 132 | 7380 12150 9780        | 1130 -2410 1690 | H0 |
| ATOM 14744 HB3 SER E 132  | -1.585 -13.353 41.635  | 1.00 79.53      | H0 |
| ANISOU14744 HB3 SER E 132 | 7750 12590 9870        | 1080 -2720 1770 | H0 |
| ATOM 14745 N GLY E 133    | -4.523 -10.871 40.365  | 1.00 70.67      | N0 |
| ANISOU14745 N GLY E 133   | 7060 11260 8540        | 550 -2100 1400  | N0 |
| ATOM 14746 CA GLY E 133   | -5.709 -10.367 39.647  | 1.00 67.51      | C0 |
| ANISOU14746 CA GLY E 133  | 6810 10740 8100        | 450 -1850 1300  | C0 |
| ATOM 14747 C GLY E 133    | -6.555 -11.495 39.084  | 1.00 65.94      | C0 |
| ANISOU14747 C GLY E 133   | 6740 10370 7940        | 580 -1680 1370  | C0 |
| ATOM 14748 O GLY E 133    | -6.242 -12.671 39.358  | 1.00 67.23      | O0 |
| ANISOU14748 O GLY E 133   | 6910 10490 8140        | 740 -1760 1500  | O0 |
| ATOM 14749 H GLY E 133    | -4.654 -10.962 41.262  | 1.00 71.62      | H0 |
| ANISOU14749 H GLY E 133   | 7300 11410 8510        | 530 -2220 1460  | H0 |
| ATOM 14750 HA2 GLY E 133  | -6.255 -9.826 40.267   | 1.00 67.21      | H0 |
| ANISOU14750 HA2 GLY E 133 | 6920 10720 7900        | 340 -1860 1270  | H0 |
| ATOM 14751 HA3 GLY E 133  | -5.411 -9.782 38.907   | 1.00 66.89      | H0 |
| ANISOU14751 HA3 GLY E 133 | 6600 10680 8140        | 390 -1770 1210  | H0 |
| ATOM 14752 N ALA E 134    | -7.601 -11.142 38.334  | 1.00 63.49      | N0 |
| ANISOU14752 N ALA E 134   | 6540 9960 7620         | 500 -1450 1280  | N0 |
| ATOM 14753 CA ALA E 134   | -8.469 -12.073 37.579  | 1.00 62.22      | C0 |
| ANISOU14753 CA ALA E 134  | 6490 9650 7510         | 590 -1260 1320  | C0 |
| ATOM 14754 C ALA E 134    | -8.037 -12.056 36.111  | 1.00 61.64      | C0 |
| ANISOU14754 C ALA E 134   | 6230 9530 7660         | 640 -1120 1250  | C0 |
| ATOM 14755 O ALA E 134    | -7.508 -11.016 35.668  | 1.00 61.26      | O0 |
| ANISOU14755 O ALA E 134   | 6030 9560 7680         | 550 -1100 1150  | O0 |
| ATOM 14756 CB ALA E 134   | -9.914 -11.670 37.738  | 1.00 60.38      | C0 |
| ANISOU14756 CB ALA E 134  | 6470 9360 7110         | 470 -1130 1260  | C0 |
| ATOM 14757 H ALA E 134    | -7.859 -10.274 38.231  | 1.00 62.70      | H0 |
| ANISOU14757 H ALA E 134   | 6460 9890 7480         | 390 -1400 1190  | H0 |
| ATOM 14758 HA ALA E 134   | -8.346 -12.983 37.936  | 1.00 63.31      | H0 |
| ANISOU14758 HA ALA E 134  | 6670 9750 7640         | 690 -1330 1420  | H0 |
| ATOM 14759 HB1 ALA E 134  | -10.487 -12.360 37.362 | 1.00 59.71      | H0 |
| ANISOU14759 HB1 ALA E 134 | 6470 9180 7040         | 520 -1020 1300  | H0 |
| ATOM 14760 HB2 ALA E 134  | -10.118 -11.559 38.681 | 1.00 61.12      | H0 |
| ANISOU14760 HB2 ALA E 134 | 6680 9500 7050         | 430 -1210 1290  | H0 |
| ATOM 14761 HB3 ALA E 134  | -10.071 -10.831 37.273 | 1.00 59.34      | H0 |
| ANISOU14761 HB3 ALA E 134 | 6310 9250 7000         | 390 -1050 1160  | H0 |
| ATOM 14762 N THR E 135    | -8.240 -13.163 35.393  | 1.00 61.76      | N0 |
| ANISOU14762 N THR E 135   | 6270 9420 7780         | 770 -1010 1300  | N0 |
| ATOM 14763 CA THR E 135   | -7.998 -13.266 33.929  | 1.00 61.77      | C0 |
| ANISOU14763 CA THR E 135  | 6130 9360 7980         | 820 -840 1240   | C0 |
| ATOM 14764 C THR E 135    | -9.317 -13.606 33.227  | 1.00 60.31      | C0 |
| ANISOU14764 C THR E 135   | 6130 9030 7750         | 790 -640 1210   | C0 |
| ATOM 14765 O THR E 135    | -9.704 -14.794 33.230  | 1.00 60.63      | O0 |
| ANISOU14765 O THR E 135   | 6300 8960 7790         | 890 -600 1290   | O0 |
| ATOM 14766 CB THR E 135   | -6.877 -14.260 33.610  | 1.00 63.45      | C0 |
| ANISOU14766 CB THR E 135  | 6180 9560 8370         | 1020 -890 1310  | C0 |
| ATOM 14767 OG1 THR E 135  | -5.704 -13.788 34.274  | 1.00 65.54      | O0 |
| ANISOU14767 OG1 THR E 135 | 6250 9990 8670         | 1030 -1080 1320 | O0 |



|             |                |         |         |        |      |       |      |    |
|-------------|----------------|---------|---------|--------|------|-------|------|----|
| ATOM 14768  | CG2 THR E 135  | -6.610  | -14.390 | 32.127 | 1.00 | 62.82 | C0   |    |
| ANISOU14768 | CG2 THR E 135  | 5980    | 9420    | 8470   | 1070 | -700  | 1230 | C0 |
| ATOM 14769  | H THR E 135    | -8.546  | -13.942 | 35.753 | 1.00 | 62.30 | H0   |    |
| ANISOU14769 | H THR E 135    | 6450    | 9420    | 7800   | 840  | -1030 | 1380 | H0 |
| ATOM 14770  | HA THR E 135   | -7.709  | -12.382 | 33.617 | 1.00 | 61.27 | H0   |    |
| ANISOU14770 | HA THR E 135   | 5970    | 9360    | 7940   | 740  | -820  | 1150 | H0 |
| ATOM 14771  | HB THR E 135   | -7.124  | -15.143 | 33.975 | 1.00 | 64.11 | H0   |    |
| ANISOU14771 | HB THR E 135   | 6380    | 9560    | 8420   | 1110 | -920  | 1390 | H0 |
| ATOM 14772  | HG21 THR E 135 | -7.310  | -14.928 | 31.715 | 1.00 | 61.87 | H0   |    |
| ANISOU14772 | HG21 THR E 135 | 5990    | 9180    | 8340   | 1090 | -590  | 1240 | H0 |
| ATOM 14773  | HG22 THR E 135 | -5.748  | -14.821 | 31.988 | 1.00 | 64.26 | H0   |    |
| ANISOU14773 | HG22 THR E 135 | 6010    | 9630    | 8770   | 1190 | -740  | 1260 | H0 |
| ATOM 14774  | HG23 THR E 135 | -6.599  | -13.506 | 31.719 | 1.00 | 61.93 | H0   |    |
| ANISOU14774 | HG23 THR E 135 | 5800    | 9360    | 8370   | 960  | -640  | 1140 | H0 |
| ATOM 14775  | N CYS E 136    | -9.974  | -12.586 | 32.666 | 1.00 | 59.14 | N0   |    |
| ANISOU14775 | N CYS E 136    | 6010    | 8900    | 7560   | 650  | -520  | 1090 | N0 |
| ATOM 14776  | CA CYS E 136   | -11.232 | -12.690 | 31.880 | 1.00 | 57.89 | C0   |    |
| ANISOU14776 | CA CYS E 136   | 5990    | 8640    | 7370   | 610  | -330  | 1040 | C0 |
| ATOM 14777  | C CYS E 136    | -10.880 | -12.940 | 30.409 | 1.00 | 57.41 | C0   |    |
| ANISOU14777 | C CYS E 136    | 5830    | 8510    | 7480   | 660  | -190  | 990  | C0 |
| ATOM 14778  | O CYS E 136    | -10.239 | -12.065 | 29.800 | 1.00 | 57.82 | O0   |    |
| ANISOU14778 | O CYS E 136    | 5740    | 8620    | 7610   | 620  | -160  | 910  | O0 |
| ATOM 14779  | CB CYS E 136   | -12.072 | -11.426 | 32.030 | 1.00 | 57.09 | C0   |    |
| ANISOU14779 | CB CYS E 136   | 5970    | 8590    | 7140   | 460  | -290  | 950  | C0 |
| ATOM 14780  | SG CYS E 136   | -13.511 | -11.364 | 30.928 | 1.00 | 56.22 | S0   |    |
| ANISOU14780 | SG CYS E 136   | 5970    | 8390    | 7000   | 410  | -90   | 870  | S0 |
| ATOM 14781  | H CYS E 136    | -9.683  | -11.725 | 32.729 | 1.00 | 59.09 | H0   |    |
| ANISOU14781 | H CYS E 136    | 5940    | 8970    | 7550   | 580  | -550  | 1040 | H0 |
| ATOM 14782  | HA CYS E 136   | -11.748 | -13.455 | 32.222 | 1.00 | 58.02 | H0   |    |
| ANISOU14782 | HA CYS E 136   | 6120    | 8590    | 7330   | 640  | -330  | 1110 | H0 |
| ATOM 14783  | HB2 CYS E 136  | -12.387 | -11.359 | 32.954 | 1.00 | 57.63 | H0   |    |
| ANISOU14783 | HB2 CYS E 136  | 6120    | 8690    | 7090   | 430  | -370  | 980  | H0 |
| ATOM 14784  | HB3 CYS E 136  | -11.510 | -10.645 | 31.848 | 1.00 | 57.34 | H0   |    |
| ANISOU14784 | HB3 CYS E 136  | 5900    | 8670    | 7210   | 420  | -320  | 890  | H0 |
| ATOM 14785  | N ARG E 137    | -11.284 | -14.092 | 29.868 | 1.00 | 56.97 | N0   |    |
| ANISOU14785 | N ARG E 137    | 5860    | 8330    | 7460   | 750  | -100  | 1030 | N0 |
| ATOM 14786  | CA ARG E 137   | -11.018 | -14.496 | 28.463 | 1.00 | 56.55 | C0   |    |
| ANISOU14786 | CA ARG E 137   | 5740    | 8190    | 7550   | 810  | 50    | 980  | C0 |
| ATOM 14787  | C ARG E 137    | -12.249 | -14.182 | 27.608 | 1.00 | 54.36 | C0   |    |
| ANISOU14787 | C ARG E 137    | 5590    | 7860    | 7210   | 700  | 200   | 900  | C0 |
| ATOM 14788  | O ARG E 137    | -13.347 | -14.644 | 27.954 | 1.00 | 54.24 | O0   |    |
| ANISOU14788 | O ARG E 137    | 5730    | 7790    | 7090   | 660  | 220   | 930  | O0 |
| ATOM 14789  | CB ARG E 137   | -10.642 | -15.977 | 28.403 | 1.00 | 58.20 | C0   |    |
| ANISOU14789 | CB ARG E 137   | 5990    | 8280    | 7850   | 970  | 50    | 1070 | C0 |
| ATOM 14790  | CG ARG E 137   | -9.542  | -16.354 | 29.382 | 1.00 | 60.57 | C0   |    |
| ANISOU14790 | CG ARG E 137   | 6180    | 8640    | 8190   | 1090 | -130  | 1160 | C0 |
| ATOM 14791  | CD ARG E 137   | -9.003  | -17.754 | 29.191 | 1.00 | 62.60 | C0   |    |
| ANISOU14791 | CD ARG E 137   | 6460    | 8770    | 8560   | 1290 | -130  | 1240 | C0 |
| ATOM 14792  | NE ARG E 137   | -8.173  | -18.106 | 30.334 | 1.00 | 65.62 | N0   |    |
| ANISOU14792 | NE ARG E 137   | 6780    | 9210    | 8940   | 1410 | -330  | 1350 | N0 |
| ATOM 14793  | CZ ARG E 137   | -6.930  | -17.675 | 30.546 | 1.00 | 67.56 | C0   |    |
| ANISOU14793 | CZ ARG E 137   | 6780    | 9600    | 9290   | 1480 | -440  | 1350 | C0 |
| ATOM 14794  | NH1 ARG E 137  | -6.331  | -16.870 | 29.682 | 1.00 | 67.64 | N0   |    |
| ANISOU14794 | NH1 ARG E 137  | 6580    | 9710    | 9410   | 1430 | -360  | 1240 | N0 |

|                            |         |         |        |      |       |      |    |
|----------------------------|---------|---------|--------|------|-------|------|----|
| ATOM 14795 NH2 ARG E 137   | -6.282  | -18.059 | 31.633 | 1.00 | 69.65 |      | N0 |
| ANISOU14795 NH2 ARG E 137  | 7010    | 9920    | 9540   | 1590 | -650  | 1460 | N0 |
| ATOM 14796 H ARG E 137     | -11.759 | -14.711 | 30.339 | 1.00 | 57.24 |      | H0 |
| ANISOU14796 H ARG E 137    | 6000    | 8310    | 7430   | 760  | -120  | 1090 | H0 |
| ATOM 14797 HA ARG E 137    | -10.259 | -13.968 | 28.130 | 1.00 | 56.87 |      | H0 |
| ANISOU14797 HA ARG E 137   | 5640    | 8290    | 7670   | 810  | 50    | 940  | H0 |
| ATOM 14798 HB2 ARG E 137   | -11.438 | -16.513 | 28.597 | 1.00 | 57.89 |      | H0 |
| ANISOU14798 HB2 ARG E 137  | 6100    | 8170    | 7730   | 950  | 70    | 1100 | H0 |
| ATOM 14799 HB3 ARG E 137   | -10.346 | -16.191 | 27.493 | 1.00 | 58.20 |      | H0 |
| ANISOU14799 HB3 ARG E 137  | 5930    | 8240    | 7940   | 1020 | 140   | 1030 | H0 |
| ATOM 14800 HG2 ARG E 137   | -8.803  | -15.717 | 29.290 | 1.00 | 60.97 |      | H0 |
| ANISOU14800 HG2 ARG E 137  | 6070    | 8790    | 8300   | 1090 | -160  | 1120 | H0 |
| ATOM 14801 HG3 ARG E 137   | -9.889  | -16.276 | 30.296 | 1.00 | 60.71 |      | H0 |
| ANISOU14801 HG3 ARG E 137  | 6280    | 8690    | 8100   | 1050 | -220  | 1210 | H0 |
| ATOM 14802 HD2 ARG E 137   | -9.748  | -18.387 | 29.116 | 1.00 | 62.34 |      | H0 |
| ANISOU14802 HD2 ARG E 137  | 6590    | 8620    | 8470   | 1280 | -70   | 1260 | H0 |
| ATOM 14803 HD3 ARG E 137   | -8.475  | -17.799 | 28.366 | 1.00 | 62.96 |      | H0 |
| ANISOU14803 HD3 ARG E 137  | 6390    | 8810    | 8720   | 1350 | -50   | 1190 | H0 |
| ATOM 14804 HE ARG E 137    | -8.522  | -18.631 | 30.936 | 1.00 | 66.01 |      | H0 |
| ANISOU14804 HE ARG E 137   | 6960    | 9200    | 8920   | 1430 | -390  | 1420 | H0 |
| ATOM 14805 HH11 ARG E 137  | -6.749  | -16.606 | 28.958 | 1.00 | 66.12 |      | H0 |
| ANISOU14805 HH11 ARG E 137 | 6420    | 9480    | 9230   | 1360 | -230  | 1170 | H0 |
| ATOM 14806 HH12 ARG E 137  | -5.510  | -16.598 | 29.837 | 1.00 | 68.54 |      | H0 |
| ANISOU14806 HH12 ARG E 137 | 6520    | 9920    | 9600   | 1470 | -430  | 1240 | H0 |
| ATOM 14807 HH21 ARG E 137  | -6.672  | -18.598 | 32.211 | 1.00 | 70.01 |      | H0 |
| ANISOU14807 HH21 ARG E 137 | 7210    | 9890    | 9500   | 1610 | -700  | 1540 | H0 |
| ATOM 14808 HH22 ARG E 137  | -5.458  | -17.782 | 31.775 | 1.00 | 70.73 |      | H0 |
| ANISOU14808 HH22 ARG E 137 | 6970    | 10160   | 9750   | 1630 | -730  | 1460 | H0 |
| ATOM 14809 N ILE E 138     | -12.061 | -13.410 | 26.537 | 1.00 | 53.41 |      | N0 |
| ANISOU14809 N ILE E 138    | 5390    | 7750    | 7150   | 660  | 300   | 810  | N0 |
| ATOM 14810 CA ILE E 138    | -13.125 | -13.031 | 25.563 | 1.00 | 51.50 |      | C0 |
| ANISOU14810 CA ILE E 138   | 5240    | 7460    | 6860   | 570  | 430   | 730  | C0 |
| ATOM 14811 C ILE E 138     | -12.777 | -13.669 | 24.217 | 1.00 | 51.63 |      | C0 |
| ANISOU14811 C ILE E 138    | 5240    | 7390    | 6990   | 630  | 570   | 700  | C0 |
| ATOM 14812 O ILE E 138     | -11.709 | -13.328 | 23.671 | 1.00 | 52.33 |      | O0 |
| ANISOU14812 O ILE E 138    | 5180    | 7510    | 7190   | 660  | 600   | 660  | O0 |
| ATOM 14813 CB ILE E 138    | -13.249 | -11.499 | 25.471 | 1.00 | 50.49 |      | C0 |
| ANISOU14813 CB ILE E 138   | 5090    | 7420    | 6680   | 460  | 430   | 660  | C0 |
| ATOM 14814 CG1 ILE E 138   | -13.679 | -10.899 | 26.811 | 1.00 | 50.93 |      | C0 |
| ANISOU14814 CG1 ILE E 138  | 5190    | 7550    | 6610   | 410  | 310   | 680  | C0 |
| ATOM 14815 CG2 ILE E 138   | -14.184 | -11.096 | 24.342 | 1.00 | 49.29 |      | C0 |
| ANISOU14815 CG2 ILE E 138  | 5020    | 7220    | 6490   | 400  | 550   | 580  | C0 |
| ATOM 14816 CD1 ILE E 138   | -13.721 | -9.391  | 26.824 | 1.00 | 51.08 |      | C0 |
| ANISOU14816 CD1 ILE E 138  | 5200    | 7630    | 6570   | 310  | 290   | 600  | C0 |
| ATOM 14817 H ILE E 138     | -11.247 | -13.057 | 26.329 | 1.00 | 53.92 |      | H0 |
| ANISOU14817 H ILE E 138    | 5330    | 7860    | 7290   | 670  | 290   | 790  | H0 |
| ATOM 14818 HA ILE E 138    | -13.975 | -13.392 | 25.872 | 1.00 | 51.12 |      | H0 |
| ANISOU14818 HA ILE E 138   | 5310    | 7390    | 6730   | 550  | 430   | 750  | H0 |
| ATOM 14819 HB ILE E 138    | -12.352 | -11.141 | 25.260 | 1.00 | 51.22 |      | H0 |
| ANISOU14819 HB ILE E 138   | 5070    | 7550    | 6840   | 470  | 420   | 640  | H0 |
| ATOM 14820 HG12 ILE E 138  | -14.571 | -11.240 | 27.036 | 1.00 | 50.51 |      | H0 |
| ANISOU14820 HG12 ILE E 138 | 5240    | 7480    | 6480   | 400  | 320   | 690  | H0 |
| ATOM 14821 HG13 ILE E 138  | -13.058 | -11.201 | 27.506 | 1.00 | 51.96 |      | H0 |
| ANISOU14821 HG13 ILE E 138 | 5270    | 7720    | 6750   | 450  | 220   | 730  | H0 |

|                            |         |         |        |      |       |     |
|----------------------------|---------|---------|--------|------|-------|-----|
| ATOM 14822 HG21 ILE E 138  | -13.800 | -11.360 | 23.488 | 1.00 | 49.39 | H0  |
| ANISOU14822 HG21 ILE E 138 | 5000    | 7190    | 6570   | 430  | 630   | 560 |
| ATOM 14823 HG22 ILE E 138  | -14.311 | -10.132 | 24.350 | 1.00 | 48.82 | H0  |
| ANISOU14823 HG22 ILE E 138 | 4960    | 7200    | 6390   | 340  | 540   | 540 |
| ATOM 14824 HG23 ILE E 138  | -15.044 | -11.535 | 24.458 | 1.00 | 48.81 | H0  |
| ANISOU14824 HG23 ILE E 138 | 5050    | 7130    | 6370   | 400  | 570   | 590 |
| ATOM 14825 HD11 ILE E 138  | -12.959 | -9.040  | 26.331 | 1.00 | 51.20 | H0  |
| ANISOU14825 HD11 ILE E 138 | 5130    | 7660    | 6660   | 300  | 310   | 570 |
| ATOM 14826 HD12 ILE E 138  | -13.686 | -9.073  | 27.743 | 1.00 | 51.26 | H0  |
| ANISOU14826 HD12 ILE E 138 | 5240    | 7710    | 6530   | 290  | 210   | 610 |
| ATOM 14827 HD13 ILE E 138  | -14.544 | -9.084  | 26.407 | 1.00 | 49.96 | H0  |
| ANISOU14827 HD13 ILE E 138 | 5140    | 7470    | 6380   | 280  | 360   | 560 |
| ATOM 14828 N LYS E 139     | -13.637 | -14.571 | 23.733 | 1.00 | 51.34 | N0  |
| ANISOU14828 N LYS E 139    | 5340    | 7250    | 6920   | 640  | 650   | 700 |
| ATOM 14829 CA LYS E 139    | -13.508 | -15.262 | 22.423 | 1.00 | 51.61 | C0  |
| ANISOU14829 CA LYS E 139   | 5400    | 7180    | 7030   | 690  | 780   | 660 |
| ATOM 14830 C LYS E 139     | -14.368 | -14.529 | 21.390 | 1.00 | 49.59 | C0  |
| ANISOU14830 C LYS E 139    | 5210    | 6920    | 6710   | 580  | 880   | 570 |
| ATOM 14831 O LYS E 139     | -15.563 | -14.291 | 21.674 | 1.00 | 48.04 | O0  |
| ANISOU14831 O LYS E 139    | 5110    | 6750    | 6400   | 490  | 850   | 570 |
| ATOM 14832 CB LYS E 139    | -13.950 | -16.725 | 22.527 | 1.00 | 53.54 | C0  |
| ANISOU14832 CB LYS E 139   | 5780    | 7290    | 7270   | 740  | 800   | 710 |
| ATOM 14833 CG LYS E 139    | -12.932 | -17.676 | 23.144 | 1.00 | 56.61 | C0  |
| ANISOU14833 CG LYS E 139   | 6130    | 7620    | 7760   | 900  | 740   | 790 |
| ATOM 14834 CD LYS E 139    | -13.094 | -19.113 | 22.679 | 1.00 | 58.19 | C0  |
| ANISOU14834 CD LYS E 139   | 6470    | 7640    | 8000   | 980  | 810   | 810 |
| ATOM 14835 CE LYS E 139    | -11.977 | -20.024 | 23.143 | 1.00 | 60.97 | C0  |
| ANISOU14835 CE LYS E 139   | 6780    | 7930    | 8460   | 1170 | 750   | 890 |
| ATOM 14836 NZ LYS E 139    | -11.677 | -21.073 | 22.138 | 1.00 | 62.53 | N0  |
| ANISOU14836 NZ LYS E 139   | 7050    | 7960    | 8750   | 1290 | 880   | 850 |
| ATOM 14837 H LYS E 139     | -14.381 | -14.821 | 24.194 | 1.00 | 51.04 | H0  |
| ANISOU14837 H LYS E 139    | 5390    | 7190    | 6810   | 610  | 620   | 730 |
| ATOM 14838 HA LYS E 139    | -12.566 | -15.230 | 22.139 | 1.00 | 52.46 | H0  |
| ANISOU14838 HA LYS E 139   | 5400    | 7300    | 7240   | 750  | 800   | 650 |
| ATOM 14839 HB2 LYS E 139   | -14.771 | -16.763 | 23.061 | 1.00 | 53.04 | H0  |
| ANISOU14839 HB2 LYS E 139  | 5800    | 7230    | 7120   | 680  | 760   | 740 |
| ATOM 14840 HB3 LYS E 139   | -14.168 | -17.046 | 21.627 | 1.00 | 53.39 | H0  |
| ANISOU14840 HB3 LYS E 139  | 5820    | 7200    | 7270   | 740  | 900   | 670 |
| ATOM 14841 HG2 LYS E 139   | -12.030 | -17.366 | 22.914 | 1.00 | 57.00 | H0  |
| ANISOU14841 HG2 LYS E 139  | 6040    | 7720    | 7900   | 960  | 740   | 770 |
| ATOM 14842 HG3 LYS E 139   | -13.020 | -17.644 | 24.120 | 1.00 | 56.66 | H0  |
| ANISOU14842 HG3 LYS E 139  | 6140    | 7670    | 7720   | 900  | 640   | 860 |
| ATOM 14843 HD2 LYS E 139   | -13.947 | -19.462 | 23.015 | 1.00 | 57.87 | H0  |
| ANISOU14843 HD2 LYS E 139  | 6560    | 7560    | 7870   | 910  | 800   | 840 |
| ATOM 14844 HD3 LYS E 139   | -13.128 | -19.129 | 21.699 | 1.00 | 57.94 | H0  |
| ANISOU14844 HD3 LYS E 139  | 6450    | 7570    | 7990   | 970  | 920   | 750 |
| ATOM 14845 HE2 LYS E 139   | -11.170 | -19.499 | 23.303 | 1.00 | 61.29 | H0  |
| ANISOU14845 HE2 LYS E 139  | 6660    | 8060    | 8560   | 1220 | 710   | 890 |
| ATOM 14846 HE3 LYS E 139   | -12.231 | -20.452 | 23.982 | 1.00 | 61.36 | H0  |
| ANISOU14846 HE3 LYS E 139  | 6910    | 7950    | 8460   | 1180 | 670   | 970 |
| ATOM 14847 HZ1 LYS E 139   | -12.432 | -21.533 | 21.939 | 1.00 | 62.06 | H0  |
| ANISOU14847 HZ1 LYS E 139  | 7140    | 7810    | 8630   | 1220 | 920   | 850 |
| ATOM 14848 HZ2 LYS E 139   | -11.057 | -21.647 | 22.469 | 1.00 | 63.77 | H0  |
| ANISOU14848 HZ2 LYS E 139  | 7190    | 8070    | 8970   | 1420 | 840   | 900 |

|             |                |         |         |        |      |          |    |
|-------------|----------------|---------|---------|--------|------|----------|----|
| ATOM 14849  | HZ3 LYS E 139  | -11.353 | -20.691 | 21.382 | 1.00 | 62.15    | H0 |
| ANISOU14849 | HZ3 LYS E 139  | 6920    | 7940    | 8750   | 1280 | 960 780  | H0 |
| ATOM 14850  | N ILE E 140    | -13.786 | -14.213 | 20.231 | 1.00 | 48.41    | N0 |
| ANISOU14850 | N ILE E 140    | 5010    | 6760    | 6630   | 580  | 980 500  | N0 |
| ATOM 14851  | CA ILE E 140   | -14.452 | -13.465 | 19.125 | 1.00 | 47.39    | C0 |
| ANISOU14851 | CA ILE E 140   | 4940    | 6630    | 6430   | 480  | 1070 430 | C0 |
| ATOM 14852  | C ILE E 140    | -14.165 | -14.188 | 17.807 | 1.00 | 47.18    | C0 |
| ANISOU14852 | C ILE E 140    | 4960    | 6510    | 6460   | 520  | 1210 380 | C0 |
| ATOM 14853  | O ILE E 140    | -12.981 | -14.411 | 17.507 | 1.00 | 47.38    | O0 |
| ANISOU14853 | O ILE E 140    | 4880    | 6530    | 6590   | 600  | 1270 370 | O0 |
| ATOM 14854  | CB ILE E 140   | -13.984 | -11.997 | 19.097 | 1.00 | 47.52    | C0 |
| ANISOU14854 | CB ILE E 140   | 4870    | 6740    | 6440   | 420  | 1050 390 | C0 |
| ATOM 14855  | CG1 ILE E 140  | -14.579 | -11.206 | 20.265 | 1.00 | 47.44    | C0 |
| ANISOU14855 | CG1 ILE E 140  | 4880    | 6810    | 6340   | 370  | 920 420  | C0 |
| ATOM 14856  | CG2 ILE E 140  | -14.307 | -11.348 | 17.758 | 1.00 | 47.43    | C0 |
| ANISOU14856 | CG2 ILE E 140  | 4930    | 6710    | 6380   | 350  | 1150 320 | C0 |
| ATOM 14857  | CD1 ILE E 140  | -13.801 | -9.964  | 20.619 | 1.00 | 48.27    | C0 |
| ANISOU14857 | CD1 ILE E 140  | 4890    | 6990    | 6460   | 320  | 870 400  | C0 |
| ATOM 14858  | H ILE E 140    | -12.924 | -14.440 | 20.041 | 1.00 | 49.58    | H0 |
| ANISOU14858 | H ILE E 140    | 5070    | 6900    | 6860   | 640  | 1010 500 | H0 |
| ATOM 14859  | HA ILE E 140   | -15.411 | -13.476 | 19.282 | 1.00 | 46.63    | H0 |
| ANISOU14859 | HA ILE E 140   | 4930    | 6530    | 6250   | 440  | 1040 430 | H0 |
| ATOM 14860  | HB ILE E 140   | -13.001 | -11.995 | 19.204 | 1.00 | 48.47    | H0 |
| ANISOU14860 | HB ILE E 140   | 4890    | 6890    | 6640   | 460  | 1050 400 | H0 |
| ATOM 14861  | HG12 ILE E 140 | -15.497 | -10.947 | 20.034 | 1.00 | 46.66    | H0 |
| ANISOU14861 | HG12 ILE E 140 | 4860    | 6700    | 6160   | 330  | 930 400  | H0 |
| ATOM 14862  | HG13 ILE E 140 | -14.619 | -11.786 | 21.053 | 1.00 | 47.74    | H0 |
| ANISOU14862 | HG13 ILE E 140 | 4910    | 6850    | 6380   | 410  | 860 470  | H0 |
| ATOM 14863  | HG21 ILE E 140 | -13.653 | -11.626 | 17.093 | 1.00 | 47.93    | H0 |
| ANISOU14863 | HG21 ILE E 140 | 4960    | 6740    | 6510   | 380  | 1230 300 | H0 |
| ATOM 14864  | HG22 ILE E 140 | -14.279 | -10.380 | 17.849 | 1.00 | 46.98    | H0 |
| ANISOU14864 | HG22 ILE E 140 | 4860    | 6690    | 6290   | 300  | 1120 310 | H0 |
| ATOM 14865  | HG23 ILE E 140 | -15.196 | -11.618 | 17.469 | 1.00 | 46.74    | H0 |
| ANISOU14865 | HG23 ILE E 140 | 4940    | 6580    | 6230   | 330  | 1160 310 | H0 |
| ATOM 14866  | HD11 ILE E 140 | -12.861 | -10.189 | 20.732 | 1.00 | 48.99    | H0 |
| ANISOU14866 | HD11 ILE E 140 | 4870    | 7100    | 6640   | 360  | 870 420  | H0 |
| ATOM 14867  | HD12 ILE E 140 | -14.146 | -9.589  | 21.448 | 1.00 | 47.86    | H0 |
| ANISOU14867 | HD12 ILE E 140 | 4850    | 6980    | 6350   | 300  | 790 420  | H0 |
| ATOM 14868  | HD13 ILE E 140 | -13.892 | -9.308  | 19.906 | 1.00 | 47.78    | H0 |
| ANISOU14868 | HD13 ILE E 140 | 4850    | 6920    | 6380   | 270  | 930 360  | H0 |
| ATOM 14869  | N GLY E 141    | -15.220 | -14.531 | 17.062 | 1.00 | 46.03    | N0 |
| ANISOU14869 | N GLY E 141    | 4960    | 6300    | 6230   | 460  | 1260 340 | N0 |
| ATOM 14870  | CA GLY E 141   | -15.128 | -15.282 | 15.797 | 1.00 | 46.09    | C0 |
| ANISOU14870 | CA GLY E 141   | 5050    | 6210    | 6250   | 480  | 1390 280 | C0 |
| ATOM 14871  | C GLY E 141    | -16.357 | -15.070 | 14.936 | 1.00 | 44.77    | C0 |
| ANISOU14871 | C GLY E 141    | 5020    | 6020    | 5960   | 380  | 1420 230 | C0 |
| ATOM 14872  | O GLY E 141    | -17.314 | -14.422 | 15.411 | 1.00 | 43.75    | O0 |
| ANISOU14872 | O GLY E 141    | 4910    | 5970    | 5750   | 310  | 1330 250 | O0 |
| ATOM 14873  | H GLY E 141    | -16.072 | -14.315 | 17.303 | 1.00 | 45.33    | H0 |
| ANISOU14873 | H GLY E 141    | 4930    | 6230    | 6060   | 410  | 1220 350 | H0 |
| ATOM 14874  | HA2 GLY E 141  | -14.325 | -14.984 | 15.301 | 1.00 | 46.60    | H0 |
| ANISOU14874 | HA2 GLY E 141  | 5050    | 6280    | 6370   | 510  | 1460 260 | H0 |
| ATOM 14875  | HA3 GLY E 141  | -15.028 | -16.245 | 15.998 | 1.00 | 46.81    | H0 |
| ANISOU14875 | HA3 GLY E 141  | 5180    | 6230    | 6380   | 540  | 1400 310 | H0 |

|                           |                                   |    |
|---------------------------|-----------------------------------|----|
| ATOM 14876 N SER E 142    | -16.330 -15.583 13.707 1.00 44.21 | N0 |
| ANISOU14876 N SER E 142   | 5050 5870 5880 370 1530 170       | N0 |
| ATOM 14877 CA SER E 142   | -17.479 -15.561 12.771 1.00 43.47 | C0 |
| ANISOU14877 CA SER E 142  | 5100 5760 5660 270 1550 120       | C0 |
| ATOM 14878 C SER E 142    | -18.599 -16.437 13.339 1.00 43.51 | C0 |
| ANISOU14878 C SER E 142   | 5180 5730 5620 220 1480 140       | C0 |
| ATOM 14879 O SER E 142    | -18.279 -17.465 13.976 1.00 44.91 | O0 |
| ANISOU14879 O SER E 142   | 5370 5830 5860 280 1480 190       | O0 |
| ATOM 14880 CB SER E 142   | -17.081 -16.014 11.400 1.00 44.11 | C0 |
| ANISOU14880 CB SER E 142  | 5270 5750 5740 270 1690 40        | C0 |
| ATOM 14881 OG SER E 142   | -18.199 -15.982 10.529 1.00 43.74 | O0 |
| ANISOU14881 OG SER E 142  | 5360 5700 5560 170 1690 0         | O0 |
| ATOM 14882 H SER E 142    | -15.597 -15.989 13.350 1.00 45.23 | H0 |
| ANISOU14882 H SER E 142   | 5160 5950 6070 430 1610 150       | H0 |
| ATOM 14883 HA SER E 142   | -17.813 -14.625 12.711 1.00 42.79 | H0 |
| ANISOU14883 HA SER E 142  | 4990 5750 5520 220 1510 110       | H0 |
| ATOM 14884 HB2 SER E 142  | -16.373 -15.427 11.052 1.00 44.33 | H0 |
| ANISOU14884 HB2 SER E 142 | 5240 5810 5790 290 1740 30        | H0 |
| ATOM 14885 HB3 SER E 142  | -16.726 -16.929 11.449 1.00 44.97 | H0 |
| ANISOU14885 HB3 SER E 142 | 5410 5780 5900 330 1740 40        | H0 |
| ATOM 14886 N TRP E 143    | -19.856 -16.044 13.112 1.00 42.19 | N0 |
| ANISOU14886 N TRP E 143   | 5070 5630 5340 120 1430 120       | N0 |
| ATOM 14887 CA TRP E 143   | -21.056 -16.808 13.541 1.00 41.33 | C0 |
| ANISOU14887 CA TRP E 143  | 5030 5510 5160 40 1370 140        | C0 |
| ATOM 14888 C TRP E 143    | -21.413 -17.859 12.482 1.00 41.66 | C0 |
| ANISOU14888 C TRP E 143   | 5220 5440 5160 -20 1440 80        | C0 |
| ATOM 14889 O TRP E 143    | -21.831 -18.955 12.882 1.00 41.52 | O0 |
| ANISOU14889 O TRP E 143   | 5280 5350 5150 -60 1440 100       | O0 |
| ATOM 14890 CB TRP E 143   | -22.235 -15.871 13.833 1.00 40.09 | C0 |
| ANISOU14890 CB TRP E 143  | 4820 5500 4910 -30 1280 140       | C0 |
| ATOM 14891 CG TRP E 143   | -23.351 -16.564 14.548 1.00 40.34 | C0 |
| ANISOU14891 CG TRP E 143  | 4870 5560 4890 -110 1220 160      | C0 |
| ATOM 14892 CD1 TRP E 143  | -24.610 -16.810 14.084 1.00 40.33 | C0 |
| ANISOU14892 CD1 TRP E 143 | 4910 5610 4800 -220 1200 120      | C0 |
| ATOM 14893 CD2 TRP E 143  | -23.286 -17.145 15.863 1.00 40.82 | C0 |
| ANISOU14893 CD2 TRP E 143 | 4910 5610 4990 -100 1190 240      | C0 |
| ATOM 14894 NE1 TRP E 143  | -25.333 -17.500 15.020 1.00 41.02 | N0 |
| ANISOU14894 NE1 TRP E 143 | 4990 5720 4870 -300 1170 160      | N0 |
| ATOM 14895 CE2 TRP E 143  | -24.550 -17.716 16.124 1.00 40.84 | C0 |
| ANISOU14895 CE2 TRP E 143 | 4940 5660 4920 -220 1170 240      | C0 |
| ATOM 14896 CE3 TRP E 143  | -22.285 -17.243 16.837 1.00 40.84 | C0 |
| ANISOU14896 CE3 TRP E 143 | 4860 5580 5070 0 1180 300         | C0 |
| ATOM 14897 CZ2 TRP E 143  | -24.830 -18.377 17.317 1.00 41.39 | C0 |
| ANISOU14897 CZ2 TRP E 143 | 5020 5720 4980 -260 1150 300      | C0 |
| ATOM 14898 CZ3 TRP E 143  | -22.568 -17.890 18.019 1.00 41.31 | C0 |
| ANISOU14898 CZ3 TRP E 143 | 4940 5640 5130 -20 1140 370       | C0 |
| ATOM 14899 CH2 TRP E 143  | -23.823 -18.449 18.252 1.00 41.48 | C0 |
| ANISOU14899 CH2 TRP E 143 | 5010 5690 5060 -150 1130 370      | C0 |
| ATOM 14900 H TRP E 143    | -20.059 -15.273 12.671 1.00 41.69 | H0 |
| ANISOU14900 H TRP E 143   | 5000 5620 5220 100 1420 100       | H0 |
| ATOM 14901 HA TRP E 143   | -20.830 -17.274 14.380 1.00 41.55 | H0 |
| ANISOU14901 HA TRP E 143  | 5030 5520 5240 80 1350 190        | H0 |
| ATOM 14902 HB2 TRP E 143  | -21.914 -15.123 14.376 1.00 39.68 | H0 |
| ANISOU14902 HB2 TRP E 143 | 4690 5510 4880 20 1240 170        | H0 |

|                            |         |         |        |      |       |      |    |
|----------------------------|---------|---------|--------|------|-------|------|----|
| ATOM 14903 HB3 TRP E 143   | -22.566 | -15.511 | 12.984 | 1.00 | 40.12 |      | H0 |
| ANISOU14903 HB3 TRP E 143  | 4860    | 5520    | 4860   | -60  | 1290  | 100  | H0 |
| ATOM 14904 HD1 TRP E 143   | -24.944 | -16.542 | 13.241 | 1.00 | 40.52 |      | H0 |
| ANISOU14904 HD1 TRP E 143  | 4960    | 5650    | 4780   | -250 | 1200  | 80   | H0 |
| ATOM 14905 HE1 TRP E 143   | -26.166 | -17.748 | 14.930 | 1.00 | 41.28 |      | H0 |
| ANISOU14905 HE1 TRP E 143  | 5040    | 5800    | 4850   | -380 | 1150  | 150  | H0 |
| ATOM 14906 HE3 TRP E 143   | -21.430 | -16.874 | 16.683 | 1.00 | 40.74 |      | H0 |
| ANISOU14906 HE3 TRP E 143  | 4810    | 5550    | 5120   | 70   | 1200  | 300  | H0 |
| ATOM 14907 HZ2 TRP E 143   | -25.679 | -18.745 | 17.482 | 1.00 | 41.77 |      | H0 |
| ANISOU14907 HZ2 TRP E 143  | 5090    | 5800    | 4980   | -350 | 1140  | 300  | H0 |
| ATOM 14908 HZ3 TRP E 143   | -21.901 | -17.957 | 18.684 | 1.00 | 41.43 |      | H0 |
| ANISOU14908 HZ3 TRP E 143  | 4920    | 5630    | 5190   | 40   | 1120  | 420  | H0 |
| ATOM 14909 HH2 TRP E 143   | -23.991 | -18.876 | 19.073 | 1.00 | 41.90 |      | H0 |
| ANISOU14909 HH2 TRP E 143  | 5080    | 5730    | 5100   | -180 | 1110  | 430  | H0 |
| ATOM 14910 N THR E 144     | -21.265 | -17.541 | 11.189 | 1.00 | 41.31 |      | N0 |
| ANISOU14910 N THR E 144    | 5240    | 5380    | 5070   | -40  | 1510  | 10   | N0 |
| ATOM 14911 CA THR E 144    | -21.779 | -18.386 | 10.074 | 1.00 | 42.45 |      | C0 |
| ANISOU14911 CA THR E 144   | 5550    | 5430    | 5140   | -120 | 1560  | -70  | C0 |
| ATOM 14912 C THR E 144     | -20.707 | -18.716 | 9.024  | 1.00 | 43.28 |      | C0 |
| ANISOU14912 C THR E 144    | 5740    | 5420    | 5280   | -60  | 1700  | -130 | C0 |
| ATOM 14913 O THR E 144     | -21.053 | -19.475 | 8.103  | 1.00 | 44.63 |      | O0 |
| ANISOU14913 O THR E 144    | 6070    | 5500    | 5380   | -130 | 1760  | -200 | O0 |
| ATOM 14914 CB THR E 144    | -22.998 | -17.736 | 9.402  | 1.00 | 41.91 |      | C0 |
| ANISOU14914 CB THR E 144   | 5510    | 5480    | 4940   | -240 | 1490  | -100 | C0 |
| ATOM 14915 OG1 THR E 144   | -22.571 | -16.569 | 8.701  | 1.00 | 40.99 |      | O0 |
| ANISOU14915 OG1 THR E 144  | 5370    | 5420    | 4790   | -200 | 1500  | -120 | O0 |
| ATOM 14916 CG2 THR E 144   | -24.088 | -17.374 | 10.387 | 1.00 | 41.31 |      | C0 |
| ANISOU14916 CG2 THR E 144  | 5330    | 5530    | 4830   | -290 | 1360  | -60  | C0 |
| ATOM 14917 H THR E 144     | -20.870 | -16.773 | 10.899 | 1.00 | 41.15 |      | H0 |
| ANISOU14917 H THR E 144    | 5180    | 5400    | 5060   | -10  | 1520  | 0    | H0 |
| ATOM 14918 HA THR E 144    | -22.077 | -19.233 | 10.468 | 1.00 | 42.84 |      | H0 |
| ANISOU14918 HA THR E 144   | 5650    | 5430    | 5200   | -150 | 1560  | -50  | H0 |
| ATOM 14919 HB THR E 144    | -23.366 | -18.379 | 8.750  | 1.00 | 42.62 |      | H0 |
| ANISOU14919 HB THR E 144   | 5710    | 5510    | 4980   | -310 | 1510  | -150 | H0 |
| ATOM 14920 HG21 THR E 144  | -24.272 | -18.136 | 10.965 | 1.00 | 41.63 |      | H0 |
| ANISOU14920 HG21 THR E 144 | 5380    | 5540    | 4900   | -310 | 1360  | -30  | H0 |
| ATOM 14921 HG22 THR E 144  | -24.898 | -17.133 | 9.903  | 1.00 | 41.36 |      | H0 |
| ANISOU14921 HG22 THR E 144 | 5350    | 5600    | 4750   | -350 | 1320  | -90  | H0 |
| ATOM 14922 HG23 THR E 144  | -23.800 | -16.619 | 10.931 | 1.00 | 40.57 |      | H0 |
| ANISOU14922 HG23 THR E 144 | 5140    | 5500    | 4770   | -220 | 1340  | -20  | H0 |
| ATOM 14923 N HIS E 145     | -19.481 | -18.188 | 9.130  | 1.00 | 43.34 |      | N0 |
| ANISOU14923 N HIS E 145    | 5640    | 5440    | 5380   | 50   | 1770  | -110 | N0 |
| ATOM 14924 CA HIS E 145    | -18.400 | -18.379 | 8.121  | 1.00 | 44.49 |      | C0 |
| ANISOU14924 CA HIS E 145   | 5840    | 5510    | 5560   | 110  | 1920  | -170 | C0 |
| ATOM 14925 C HIS E 145     | -17.256 | -19.203 | 8.720  | 1.00 | 45.67 |      | C0 |
| ANISOU14925 C HIS E 145    | 5920    | 5570    | 5860   | 260  | 1990  | -150 | C0 |
| ATOM 14926 O HIS E 145     | -16.596 | -18.706 | 9.653  | 1.00 | 45.48 |      | O0 |
| ANISOU14926 O HIS E 145    | 5730    | 5610    | 5940   | 340  | 1950  | -80  | O0 |
| ATOM 14927 CB HIS E 145    | -17.911 | -17.033 | 7.568  | 1.00 | 43.98 |      | C0 |
| ANISOU14927 CB HIS E 145   | 5700    | 5540    | 5470   | 110  | 1960  | -180 | C0 |
| ATOM 14928 CG HIS E 145    | -18.942 | -16.320 | 6.765  | 1.00 | 43.41 |      | C0 |
| ANISOU14928 CG HIS E 145   | 5730    | 5530    | 5230   | -10  | 1900  | -210 | C0 |
| ATOM 14929 ND1 HIS E 145   | -19.294 | -16.727 | 5.494  | 1.00 | 44.17 |      | N0 |
| ANISOU14929 ND1 HIS E 145  | 6000    | 5570    | 5210   | -80  | 1960  | -290 | N0 |

|             |               |         |         |       |      |           |    |
|-------------|---------------|---------|---------|-------|------|-----------|----|
| ATOM 14930  | CD2 HIS E 145 | -19.707 | -15.244 | 7.047 | 1.00 | 42.25     | C0 |
| ANISOU14930 | CD2 HIS E 145 | 5530    | 5500    | 5020  | -60  | 1770 -170 | C0 |
| ATOM 14931  | CE1 HIS E 145 | -20.229 | -15.930 | 5.024 | 1.00 | 43.96     | C0 |
| ANISOU14931 | CE1 HIS E 145 | 6020    | 5620    | 5060  | -170 | 1870 -290 | C0 |
| ATOM 14932  | NE2 HIS E 145 | -20.502 | -15.010 | 5.960 | 1.00 | 42.86     | N0 |
| ANISOU14932 | NE2 HIS E 145 | 5750    | 5590    | 4950  | -140 | 1750 -220 | N0 |
| ATOM 14933  | H HIS E 145   | -19.211 | -17.678 | 9.834 | 1.00 | 42.74     | H0 |
| ANISOU14933 | H HIS E 145   | 5460    | 5430    | 5350  | 90   | 1720 -60  | H0 |
| ATOM 14934  | HA HIS E 145  | -18.779 | -18.893 | 7.370 | 1.00 | 45.14     | H0 |
| ANISOU14934 | HA HIS E 145  | 6050    | 5530    | 5570  | 60   | 1970 -230 | H0 |
| ATOM 14935  | HB2 HIS E 145 | -17.635 | -16.460 | 8.316 | 1.00 | 43.35     | H0 |
| ANISOU14935 | HB2 HIS E 145 | 5500    | 5530    | 5440  | 140  | 1900 -130 | H0 |
| ATOM 14936  | HB3 HIS E 145 | -17.121 | -17.189 | 7.004 | 1.00 | 44.82     | H0 |
| ANISOU14936 | HB3 HIS E 145 | 5820    | 5600    | 5600  | 150  | 2070 -220 | H0 |
| ATOM 14937  | HD2 HIS E 145 | -19.697 | -14.745 | 7.839 | 1.00 | 41.64     | H0 |
| ANISOU14937 | HD2 HIS E 145 | 5360    | 5480    | 4990  | -30  | 1710 -120 | H0 |
| ATOM 14938  | HE1 HIS E 145 | -20.633 | -15.995 | 4.177 | 1.00 | 44.46     | H0 |
| ANISOU14938 | HE1 HIS E 145 | 6200    | 5670    | 5020  | -230 | 1880 -330 | H0 |
| ATOM 14939  | N HIS E 146   | -17.035 | -20.411 | 8.190 | 1.00 | 46.98     | N0 |
| ANISOU14939 | N HIS E 146   | 6230    | 5580    | 6040  | 300  | 2100 -200 | N0 |
| ATOM 14940  | CA HIS E 146  | -15.941 | -21.334 | 8.594 | 1.00 | 48.86     | C0 |
| ANISOU14940 | CA HIS E 146  | 6440    | 5700    | 6430  | 470  | 2180 -190 | C0 |
| ATOM 14941  | C HIS E 146   | -14.608 | -20.824 | 8.030 | 1.00 | 50.03     | C0 |
| ANISOU14941 | C HIS E 146   | 6460    | 5890    | 6660  | 570  | 2310 -230 | C0 |
| ATOM 14942  | O HIS E 146   | -14.612 | -19.758 | 7.392 | 1.00 | 49.20     | O0 |
| ANISOU14942 | O HIS E 146   | 6310    | 5900    | 6480  | 490  | 2340 -260 | O0 |
| ATOM 14943  | CB HIS E 146  | -16.265 | -22.788 | 8.207 | 1.00 | 50.13     | C0 |
| ANISOU14943 | CB HIS E 146  | 6820    | 5660    | 6570  | 470  | 2240 -240 | C0 |
| ATOM 14944  | CG HIS E 146  | -16.580 | -23.026 | 6.770 | 1.00 | 50.83     | C0 |
| ANISOU14944 | CG HIS E 146  | 7100    | 5680    | 6540  | 380  | 2350 -360 | C0 |
| ATOM 14945  | ND1 HIS E 146 | -15.619 | -22.991 | 5.777 | 1.00 | 52.64     | N0 |
| ANISOU14945 | ND1 HIS E 146 | 7340    | 5880    | 6780  | 460  | 2520 -450 | N0 |
| ATOM 14946  | CD2 HIS E 146 | -17.739 | -23.356 | 6.163 | 1.00 | 51.03     | C0 |
| ANISOU14946 | CD2 HIS E 146 | 7310    | 5660    | 6410  | 210  | 2310 -410 | C0 |
| ATOM 14947  | CE1 HIS E 146 | -16.179 | -23.269 | 4.615 | 1.00 | 53.24     | C0 |
| ANISOU14947 | CE1 HIS E 146 | 7620    | 5890    | 6720  | 350  | 2590 -540 | C0 |
| ATOM 14948  | NE2 HIS E 146 | -17.481 | -23.496 | 4.828 | 1.00 | 53.01     | N0 |
| ANISOU14948 | NE2 HIS E 146 | 7700    | 5850    | 6590  | 190  | 2450 -530 | N0 |
| ATOM 14949  | H HIS E 146   | -17.556 | -20.759 | 7.529 | 1.00 | 47.49     | H0 |
| ANISOU14949 | H HIS E 146   | 6430    | 5590    | 6030  | 230  | 2120 -250 | H0 |
| ATOM 14950  | HA HIS E 146  | -15.877 | -21.297 | 9.577 | 1.00 | 48.38     | H0 |
| ANISOU14950 | HA HIS E 146  | 6280    | 5670    | 6430  | 510  | 2090 -120 | H0 |
| ATOM 14951  | HB2 HIS E 146 | -15.502 | -23.356 | 8.453 | 1.00 | 51.24     | H0 |
| ANISOU14951 | HB2 HIS E 146 | 6940    | 5720    | 6810  | 600  | 2290 -230 | H0 |
| ATOM 14952  | HB3 HIS E 146 | -17.033 | -23.086 | 8.743 | 1.00 | 49.77     | H0 |
| ANISOU14952 | HB3 HIS E 146 | 6830    | 5600    | 6480  | 400  | 2140 -200 | H0 |
| ATOM 14953  | HD2 HIS E 146 | -18.575 | -23.463 | 6.577 | 1.00 | 50.64     | H0 |
| ANISOU14953 | HD2 HIS E 146 | 7290    | 5630    | 6320  | 120  | 2210 -380 | H0 |
| ATOM 14954  | HE1 HIS E 146 | -15.741 | -23.297 | 3.782 | 1.00 | 54.27     | H0 |
| ANISOU14954 | HE1 HIS E 146 | 7810    | 5990    | 6820  | 370  | 2710 -620 | H0 |
| ATOM 14955  | N SER E 147   | -13.519 | -21.564 | 8.271 | 1.00 | 52.47     | N0 |
| ANISOU14955 | N SER E 147   | 6700    | 6120    | 7110  | 750  | 2390 -230 | N0 |
| ATOM 14956  | CA SER E 147  | -12.106 | -21.148 | 8.052 | 1.00 | 54.29     | C0 |
| ANISOU14956 | CA SER E 147  | 6740    | 6430    | 7460  | 880  | 2510 -250 | C0 |

|                           |                                  |    |
|---------------------------|----------------------------------|----|
| ATOM 14957 C SER E 147    | -11.773 -20.955 6.564 1.00 55.77 | C0 |
| ANISOU14957 C SER E 147   | 7010 6610 7570 840 2710 -370     | C0 |
| ATOM 14958 O SER E 147    | -10.797 -20.240 6.282 1.00 56.50 | O0 |
| ANISOU14958 O SER E 147   | 6930 6810 7720 870 2800 -390     | O0 |
| ATOM 14959 CB SER E 147   | -11.168 -22.139 8.681 1.00 55.83 | C0 |
| ANISOU14959 CB SER E 147  | 6860 6540 7810 1090 2540 -230    | C0 |
| ATOM 14960 OG SER E 147   | -11.303 -23.410 8.070 1.00 57.34 | O0 |
| ANISOU14960 OG SER E 147  | 7270 6520 7990 1160 2640 -300    | O0 |
| ATOM 14961 H SER E 147    | -13.571 -22.408 8.607 1.00 53.13 | H0 |
| ANISOU14961 H SER E 147   | 6860 6100 7230 810 2380 -220     | H0 |
| ATOM 14962 HA SER E 147   | -11.977 -20.275 8.507 1.00 53.26 | H0 |
| ANISOU14962 HA SER E 147  | 6470 6420 7340 840 2440 -210     | H0 |
| ATOM 14963 HB2 SER E 147  | -10.242 -21.822 8.582 1.00 56.60 | H0 |
| ANISOU14963 HB2 SER E 147 | 6800 6710 8000 1170 2610 -240    | H0 |
| ATOM 14964 HB3 SER E 147  | -11.366 -22.213 9.642 1.00 55.31 | H0 |
| ANISOU14964 HB3 SER E 147 | 6750 6480 7780 1110 2410 -150    | H0 |
| ATOM 14965 N ARG E 148    | -12.522 -21.578 5.649 1.00 57.28 | N0 |
| ANISOU14965 N ARG E 148   | 7450 6670 7630 760 2770 -450     | N0 |
| ATOM 14966 CA ARG E 148   | -12.304 -21.458 4.178 1.00 59.58 | C0 |
| ANISOU14966 CA ARG E 148  | 7870 6950 7820 700 2950 -560     | C0 |
| ATOM 14967 C ARG E 148    | -13.004 -20.199 3.650 1.00 57.41 | C0 |
| ANISOU14967 C ARG E 148   | 7620 6800 7390 510 2890 -560     | C0 |
| ATOM 14968 O ARG E 148    | -12.798 -19.872 2.464 1.00 56.88 | O0 |
| ANISOU14968 O ARG E 148   | 7650 6740 7220 450 3030 -630     | O0 |
| ATOM 14969 CB ARG E 148   | -12.822 -22.698 3.439 1.00 62.30 | C0 |
| ANISOU14969 CB ARG E 148  | 8490 7090 8080 690 3030 -660     | C0 |
| ATOM 14970 CG ARG E 148   | -12.023 -23.971 3.684 1.00 65.70 | C0 |
| ANISOU14970 CG ARG E 148  | 8940 7360 8660 900 3130 -690     | C0 |
| ATOM 14971 CD ARG E 148   | -11.015 -24.295 2.592 1.00 69.61 | C0 |
| ANISOU14971 CD ARG E 148  | 9470 7810 9170 1010 3380 -810    | C0 |
| ATOM 14972 NE ARG E 148   | -9.726 -23.636 2.793 1.00 71.66  | N0 |
| ANISOU14972 NE ARG E 148  | 9440 8220 9570 1130 3470 -790    | N0 |
| ATOM 14973 CZ ARG E 148   | -9.355 -22.463 2.272 1.00 71.83  | C0 |
| ANISOU14973 CZ ARG E 148  | 9340 8410 9550 1040 3540 -800    | C0 |
| ATOM 14974 NH1 ARG E 148  | -10.172 -21.778 1.486 1.00 71.29 | N0 |
| ANISOU14974 NH1 ARG E 148 | 9420 8380 9280 830 3520 -830     | N0 |
| ATOM 14975 NH2 ARG E 148  | -8.154 -21.978 2.542 1.00 72.76  | N0 |
| ANISOU14975 NH2 ARG E 148 | 9180 8660 9810 1150 3620 -790    | N0 |
| ATOM 14976 H ARG E 148    | -13.208 -22.131 5.873 1.00 57.09 | H0 |
| ANISOU14976 H ARG E 148   | 7550 6570 7570 720 2700 -440     | H0 |
| ATOM 14977 HA ARG E 148   | -11.337 -21.373 4.014 1.00 60.49 | H0 |
| ANISOU14977 HA ARG E 148  | 7870 7090 8020 800 3060 -590     | H0 |
| ATOM 14978 HB2 ARG E 148  | -13.746 -22.854 3.713 1.00 61.37 | H0 |
| ANISOU14978 HB2 ARG E 148 | 8470 6950 7900 600 2910 -630     | H0 |
| ATOM 14979 HB3 ARG E 148  | -12.827 -22.508 2.478 1.00 62.80 | H0 |
| ANISOU14979 HB3 ARG E 148 | 8650 7160 8050 630 3130 -730     | H0 |
| ATOM 14980 HG2 ARG E 148  | -11.545 -23.887 4.536 1.00 65.56 | H0 |
| ANISOU14980 HG2 ARG E 148 | 8760 7390 8760 1000 3070 -620    | H0 |
| ATOM 14981 HG3 ARG E 148  | -12.646 -24.725 3.768 1.00 65.98 | H0 |
| ANISOU14981 HG3 ARG E 148 | 9150 7270 8650 870 3080 -700     | H0 |
| ATOM 14982 HD2 ARG E 148  | -10.874 -25.265 2.572 1.00 70.94 | H0 |
| ANISOU14982 HD2 ARG E 148 | 9750 7830 9380 1110 3440 -850    | H0 |
| ATOM 14983 HD3 ARG E 148  | -11.384 -24.033 1.723 1.00 69.53 | H0 |
| ANISOU14983 HD3 ARG E 148 | 9590 7800 9020 890 3440 -870     | H0 |



|                            |         |         |       |      |       |         |
|----------------------------|---------|---------|-------|------|-------|---------|
| ATOM 14984 HE ARG E 148    | -9.148  | -24.041 | 3.306 | 1.00 | 72.34 | H0      |
| ANISOU14984 HE ARG E 148   | 9420    | 8280    | 9780  | 1280 | 3480  | -770 H0 |
| ATOM 14985 HH11 ARG E 148  | -10.969 | -22.087 | 1.297 | 1.00 | 70.59 | H0      |
| ANISOU14985 HH11 ARG E 148 | 9510    | 8220    | 9100  | 750  | 3460  | -840 H0 |
| ATOM 14986 HH12 ARG E 148  | -9.910  | -21.012 | 1.147 | 1.00 | 70.85 | H0      |
| ANISOU14986 HH12 ARG E 148 | 9300    | 8420    | 9190  | 770  | 3570  | -830 H0 |
| ATOM 14987 HH21 ARG E 148  | -7.605  | -22.429 | 3.063 | 1.00 | 73.52 | H0      |
| ANISOU14987 HH21 ARG E 148 | 9160    | 8740    | 10040 | 1290 | 3620  | -770 H0 |
| ATOM 14988 HH22 ARG E 148  | -7.902  | -21.208 | 2.198 | 1.00 | 72.48 | H0      |
| ANISOU14988 HH22 ARG E 148 | 9070    | 8730    | 9740  | 1070 | 3670  | -790 H0 |
| ATOM 14989 N GLU E 149     | -13.803 | -19.530 | 4.491 | 1.00 | 55.14 | N0      |
| ANISOU14989 N GLU E 149    | 7270    | 6600    | 7080  | 430  | 2690  | -460 N0 |
| ATOM 14990 CA GLU E 149    | -14.610 | -18.339 | 4.111 | 1.00 | 53.90 | C0      |
| ANISOU14990 CA GLU E 149   | 7150    | 6550    | 6780  | 270  | 2600  | -450 C0 |
| ATOM 14991 C GLU E 149     | -14.134 | -17.106 | 4.888 | 1.00 | 52.45 | C0      |
| ANISOU14991 C GLU E 149    | 6750    | 6510    | 6670  | 280  | 2530  | -370 C0 |
| ATOM 14992 O GLU E 149     | -13.991 | -16.046 | 4.258 | 1.00 | 52.00 | O0      |
| ANISOU14992 O GLU E 149    | 6700    | 6530    | 6530  | 200  | 2570  | -370 O0 |
| ATOM 14993 CB GLU E 149    | -16.093 | -18.623 | 4.344 | 1.00 | 53.46 | C0      |
| ANISOU14993 CB GLU E 149   | 7220    | 6470    | 6620  | 170  | 2440  | -430 C0 |
| ATOM 14994 CG GLU E 149    | -16.690 | -19.573 | 3.320 | 1.00 | 55.13 | C0      |
| ANISOU14994 CG GLU E 149   | 7680    | 6560    | 6710  | 100  | 2500  | -520 C0 |
| ATOM 14995 CD GLU E 149    | -18.180 | -19.803 | 3.495 | 1.00 | 55.19 | C0      |
| ANISOU14995 CD GLU E 149   | 7790    | 6580    | 6600  | -30  | 2340  | -510 C0 |
| ATOM 14996 OE1 GLU E 149   | -18.732 | -19.310 | 4.495 | 1.00 | 54.65 | O0      |
| ANISOU14996 OE1 GLU E 149  | 7590    | 6600    | 6570  | -50  | 2190  | -420 O0 |
| ATOM 14997 OE2 GLU E 149   | -18.789 | -20.471 | 2.637 | 1.00 | 56.29 | O0      |
| ANISOU14997 OE2 GLU E 149  | 8130    | 6640    | 6620  | -120 | 2360  | -580 O0 |
| ATOM 14998 H GLU E 149     | -13.920 | -19.780 | 5.356 | 1.00 | 54.80 | H0      |
| ANISOU14998 H GLU E 149    | 7160    | 6550    | 7110  | 470  | 2600  | -410 H0 |
| ATOM 14999 HA GLU E 149    | -14.475 | -18.170 | 3.150 | 1.00 | 54.59 | H0      |
| ANISOU14999 HA GLU E 149   | 7330    | 6630    | 6780  | 230  | 2700  | -510 H0 |
| ATOM 15000 HB2 GLU E 149   | -16.201 | -19.008 | 5.239 | 1.00 | 53.09 | H0      |
| ANISOU15000 HB2 GLU E 149  | 7110    | 6410    | 6650  | 210  | 2370  | -380 H0 |
| ATOM 15001 HB3 GLU E 149   | -16.583 | -17.775 | 4.317 | 1.00 | 52.50 | H0      |
| ANISOU15001 HB3 GLU E 149  | 7090    | 6440    | 6420  | 100  | 2360  | -400 H0 |
| ATOM 15002 HG2 GLU E 149   | -16.532 | -19.214 | 2.420 | 1.00 | 55.69 | H0      |
| ANISOU15002 HG2 GLU E 149  | 7820    | 6650    | 6690  | 60   | 2580  | -570 H0 |
| ATOM 15003 HG3 GLU E 149   | -16.231 | -20.438 | 3.380 | 1.00 | 56.22 | H0      |
| ANISOU15003 HG3 GLU E 149  | 7850    | 6600    | 6910  | 180  | 2580  | -550 H0 |
| ATOM 15004 N ILE E 150     | -13.930 | -17.231 | 6.203 | 1.00 | 51.61 | N0      |
| ANISOU15004 N ILE E 150    | 6480    | 6430    | 6690  | 360  | 2430  | -290 N0 |
| ATOM 15005 CA ILE E 150    | -13.313 | -16.175 | 7.062 | 1.00 | 50.94 | C0      |
| ANISOU15005 CA ILE E 150   | 6190    | 6480    | 6690  | 380  | 2360  | -220 C0 |
| ATOM 15006 C ILE E 150     | -12.222 | -16.816 | 7.920 | 1.00 | 52.25 | C0      |
| ANISOU15006 C ILE E 150    | 6170    | 6640    | 7040  | 530  | 2380  | -190 C0 |
| ATOM 15007 O ILE E 150     | -12.510 | -17.824 | 8.585 | 1.00 | 53.02 | O0      |
| ANISOU15007 O ILE E 150    | 6300    | 6650    | 7180  | 610  | 2320  | -160 O0 |
| ATOM 15008 CB ILE E 150    | -14.366 | -15.457 | 7.932 | 1.00 | 49.09 | C0      |
| ANISOU15008 CB ILE E 150   | 5940    | 6310    | 6400  | 300  | 2160  | -150 C0 |
| ATOM 15009 CG1 ILE E 150   | -15.229 | -14.509 | 7.097 | 1.00 | 48.40 | C0      |
| ANISOU15009 CG1 ILE E 150  | 5980    | 6260    | 6140  | 170  | 2130  | -170 C0 |
| ATOM 15010 CG2 ILE E 150   | -13.709 | -14.737 | 9.103 | 1.00 | 48.47 | C0      |
| ANISOU15010 CG2 ILE E 150  | 5660    | 6340    | 6420  | 340  | 2080  | -80 C0  |

|             |                |         |         |        |      |       |      |    |
|-------------|----------------|---------|---------|--------|------|-------|------|----|
| ATOM 15011  | CD1 ILE E 150  | -16.310 | -13.799 | 7.885  | 1.00 | 47.16 | C0   |    |
| ANISOU15011 | CD1 ILE E 150  | 5810    | 6180    | 5930   | 120  | 1950  | -110 | C0 |
| ATOM 15012  | H ILE E 150    | -14.170 | -17.977 | 6.667  | 1.00 | 51.78 | H0   |    |
| ANISOU15012 | H ILE E 150    | 6530    | 6400    | 6750   | 410  | 2380  | -270 | H0 |
| ATOM 15013  | HA ILE E 150   | -12.899 | -15.514 | 6.482  | 1.00 | 51.27 | H0   |    |
| ANISOU15013 | HA ILE E 150   | 6210    | 6570    | 6710   | 340  | 2430  | -240 | H0 |
| ATOM 15014  | HB ILE E 150   | -14.965 | -16.151 | 8.305  | 1.00 | 48.88 | H0   |    |
| ANISOU15014 | HB ILE E 150   | 5970    | 6240    | 6360   | 310  | 2100  | -130 | H0 |
| ATOM 15015  | HG12 ILE E 150 | -14.648 | -13.836 | 6.683  | 1.00 | 48.77 | H0   |    |
| ANISOU15015 | HG12 ILE E 150 | 6000    | 6350    | 6190   | 150  | 2200  | -180 | H0 |
| ATOM 15016  | HG13 ILE E 150 | -15.652 | -15.025 | 6.380  | 1.00 | 48.88 | H0   |    |
| ANISOU15016 | HG13 ILE E 150 | 6170    | 6270    | 6130   | 140  | 2180  | -210 | H0 |
| ATOM 15017  | HG21 ILE E 150 | -13.373 | -15.389 | 9.742  | 1.00 | 48.91 | H0   |    |
| ANISOU15017 | HG21 ILE E 150 | 5650    | 6370    | 6570   | 430  | 2060  | -50  | H0 |
| ATOM 15018  | HG22 ILE E 150 | -14.361 | -14.166 | 9.545  | 1.00 | 47.48 | H0   |    |
| ANISOU15018 | HG22 ILE E 150 | 5540    | 6260    | 6250   | 290  | 1970  | -40  | H0 |
| ATOM 15019  | HG23 ILE E 150 | -12.972 | -14.192 | 8.779  | 1.00 | 49.01 | H0   |    |
| ANISOU15019 | HG23 ILE E 150 | 5650    | 6450    | 6520   | 330  | 2150  | -90  | H0 |
| ATOM 15020  | HD11 ILE E 150 | -16.632 | -14.381 | 8.595  | 1.00 | 46.81 | H0   |    |
| ANISOU15020 | HD11 ILE E 150 | 5740    | 6120    | 5920   | 150  | 1890  | -80  | H0 |
| ATOM 15021  | HD12 ILE E 150 | -17.049 | -13.573 | 7.293  | 1.00 | 46.86 | H0   |    |
| ANISOU15021 | HD12 ILE E 150 | 5880    | 6140    | 5780   | 60   | 1930  | -130 | H0 |
| ATOM 15022  | HD13 ILE E 150 | -15.948 | -12.984 | 8.274  | 1.00 | 46.72 | H0   |    |
| ANISOU15022 | HD13 ILE E 150 | 5670    | 6180    | 5900   | 120  | 1920  | -80  | H0 |
| ATOM 15023  | N SER E 151    | -11.019 | -16.239 | 7.894  | 1.00 | 53.70 | N0   |    |
| ANISOU15023 | N SER E 151    | 6170    | 6910    | 7320   | 570  | 2460  | -190 | N0 |
| ATOM 15024  | CA SER E 151   | -9.941  | -16.480 | 8.885  | 1.00 | 55.46 | C0   |    |
| ANISOU15024 | CA SER E 151   | 6160    | 7190    | 7720   | 710  | 2440  | -150 | C0 |
| ATOM 15025  | C SER E 151    | -9.872  | -15.264 | 9.813  | 1.00 | 55.46 | C0   |    |
| ANISOU15025 | C SER E 151    | 6010    | 7330    | 7730   | 630  | 2290  | -80  | C0 |
| ATOM 15026  | O SER E 151    | -10.072 | -14.134 | 9.316  | 1.00 | 54.90 | O0   |    |
| ANISOU15026 | O SER E 151    | 5980    | 7310    | 7570   | 500  | 2310  | -90  | O0 |
| ATOM 15027  | CB SER E 151   | -8.621  | -16.756 | 8.206  | 1.00 | 57.64 | C0   |    |
| ANISOU15027 | CB SER E 151   | 6310    | 7490    | 8100   | 810  | 2630  | -210 | C0 |
| ATOM 15028  | OG SER E 151   | -8.170  | -15.615 | 7.496  | 1.00 | 57.73 | O0   |    |
| ANISOU15028 | OG SER E 151   | 6270    | 7600    | 8070   | 680  | 2730  | -250 | O0 |
| ATOM 15029  | H SER E 151    | -10.767 | -15.644 | 7.252  | 1.00 | 53.97 | H0   |    |
| ANISOU15029 | H SER E 151    | 6210    | 6990    | 7310   | 510  | 2540  | -230 | H0 |
| ATOM 15030  | HA SER E 151   | -10.192 | -17.273 | 9.426  | 1.00 | 55.58 | H0   |    |
| ANISOU15030 | HA SER E 151   | 6210    | 7140    | 7770   | 790  | 2370  | -120 | H0 |
| ATOM 15031  | HB2 SER E 151  | -7.952  | -17.006 | 8.880  | 1.00 | 58.35 | H0   |    |
| ANISOU15031 | HB2 SER E 151  | 6250    | 7610    | 8310   | 910  | 2600  | -180 | H0 |
| ATOM 15032  | HB3 SER E 151  | -8.726  | -17.510 | 7.582  | 1.00 | 58.38 | H0   |    |
| ANISOU15032 | HB3 SER E 151  | 6530    | 7480    | 8170   | 850  | 2730  | -270 | H0 |
| ATOM 15033  | N VAL E 152    | -9.648  | -15.486 | 11.111 | 1.00 | 56.80 | N0   |    |
| ANISOU15033 | N VAL E 152    | 6050    | 7530    | 8000   | 720  | 2150  | 0    | N0 |
| ATOM 15034  | CA VAL E 152   | -9.497  | -14.400 | 12.123 | 1.00 | 57.67 | C0   |    |
| ANISOU15034 | CA VAL E 152   | 6020    | 7770    | 8120   | 650  | 2010  | 60   | C0 |
| ATOM 15035  | C VAL E 152    | -8.174  | -14.615 | 12.864 | 1.00 | 60.34 | C0   |    |
| ANISOU15035 | C VAL E 152    | 6110    | 8190    | 8630   | 770  | 1990  | 90   | C0 |
| ATOM 15036  | O VAL E 152    | -8.025  | -15.650 | 13.527 | 1.00 | 62.31 | O0   |    |
| ANISOU15036 | O VAL E 152    | 6330    | 8390    | 8950   | 920  | 1930  | 130  | O0 |
| ATOM 15037  | CB VAL E 152   | -10.699 | -14.309 | 13.088 | 1.00 | 56.15 | C0   |    |
| ANISOU15037 | CB VAL E 152   | 5930    | 7560    | 7840   | 610  | 1830  | 120  | C0 |

|             |                |         |         |        |      |       |     |
|-------------|----------------|---------|---------|--------|------|-------|-----|
| ATOM 15038  | CG1 VAL E 152  | -12.008 | -14.113 | 12.339 | 1.00 | 55.14 | C0  |
| ANISOU15038 | CG1 VAL E 152  | 6020    | 7380    | 7550   | 500  | 1840  | 90  |
| ATOM 15039  | CG2 VAL E 152  | -10.805 | -15.505 | 14.020 | 1.00 | 57.02 | C0  |
| ANISOU15039 | CG2 VAL E 152  | 6050    | 7610    | 8010   | 740  | 1740  | 180 |
| ATOM 15040  | H VAL E 152    | -9.569  | -16.324 | 11.459 | 1.00 | 57.40 | H0  |
| ANISOU15040 | H VAL E 152    | 6130    | 7550    | 8130   | 820  | 2130  | 10  |
| ATOM 15041  | HA VAL E 152   | -9.438  | -13.557 | 11.647 | 1.00 | 57.31 | H0  |
| ANISOU15041 | HA VAL E 152   | 5980    | 7770    | 8030   | 550  | 2050  | 30  |
| ATOM 15042  | HB VAL E 152   | -10.559 | -13.508 | 13.651 | 1.00 | 55.83 | H0  |
| ANISOU15042 | HB VAL E 152   | 5810    | 7600    | 7800   | 560  | 1750  | 150 |
| ATOM 15043  | HG11 VAL E 152 | -11.927 | -13.353 | 11.737 | 1.00 | 54.91 | H0  |
| ANISOU15043 | HG11 VAL E 152 | 6000    | 7380    | 7480   | 430  | 1890  | 60  |
| ATOM 15044  | HG12 VAL E 152 | -12.725 | -13.946 | 12.975 | 1.00 | 54.11 | H0  |
| ANISOU15044 | HG12 VAL E 152 | 5930    | 7260    | 7380   | 470  | 1730  | 130 |
| ATOM 15045  | HG13 VAL E 152 | -12.211 | -14.913 | 11.824 | 1.00 | 55.47 | H0  |
| ANISOU15045 | HG13 VAL E 152 | 6150    | 7340    | 7590   | 530  | 1900  | 60  |
| ATOM 15046  | HG21 VAL E 152 | -10.526 | -16.310 | 13.551 | 1.00 | 57.80 | H0  |
| ANISOU15046 | HG21 VAL E 152 | 6180    | 7630    | 8150   | 810  | 1830  | 150 |
| ATOM 15047  | HG22 VAL E 152 | -11.726 | -15.607 | 14.315 | 1.00 | 55.90 | H0  |
| ANISOU15047 | HG22 VAL E 152 | 6020    | 7440    | 7790   | 690  | 1670  | 200 |
| ATOM 15048  | HG23 VAL E 152 | -10.233 | -15.367 | 14.795 | 1.00 | 57.27 | H0  |
| ANISOU15048 | HG23 VAL E 152 | 5950    | 7700    | 8110   | 780  | 1670  | 220 |
| ATOM 15049  | N ASP E 153    | -7.241  | -13.673 | 12.721 | 1.00 | 62.48 | N0  |
| ANISOU15049 | N ASP E 153    | 6200    | 8590    | 8950   | 710  | 2030  | 70  |
| ATOM 15050  | CA ASP E 153   | -5.958  | -13.645 | 13.469 | 1.00 | 65.14 | C0  |
| ANISOU15050 | CA ASP E 153   | 6260    | 9050    | 9440   | 790  | 1990  | 100 |
| ATOM 15051  | C ASP E 153    | -5.915  | -12.375 | 14.309 | 1.00 | 65.42 | C0  |
| ANISOU15051 | C ASP E 153    | 6210    | 9210    | 9440   | 650  | 1840  | 140 |
| ATOM 15052  | O ASP E 153    | -6.561  | -11.383 | 13.976 | 1.00 | 63.16 | O0  |
| ANISOU15052 | O ASP E 153    | 6050    | 8910    | 9040   | 490  | 1850  | 120 |
| ATOM 15053  | CB ASP E 153   | -4.752  | -13.707 | 12.528 | 1.00 | 67.40 | C0  |
| ANISOU15053 | CB ASP E 153   | 6380    | 9400    | 9830   | 820  | 2190  | 20  |
| ATOM 15054  | CG ASP E 153   | -4.736  | -14.934 | 11.634 | 1.00 | 68.39 | C0  |
| ANISOU15054 | CG ASP E 153   | 6600    | 9400    | 9980   | 970  | 2360  | -30 |
| ATOM 15055  | OD1 ASP E 153  | -5.673  | -15.078 | 10.829 | 1.00 | 67.45 | O0  |
| ANISOU15055 | OD1 ASP E 153  | 6730    | 9170    | 9730   | 900  | 2430  | -70 |
| ATOM 15056  | OD2 ASP E 153  | -3.789  | -15.735 | 11.753 | 1.00 | 71.11 | O0  |
| ANISOU15056 | OD2 ASP E 153  | 6770    | 9770    | 10470  | 1150 | 2410  | -40 |
| ATOM 15057  | H ASP E 153    | -7.336  | -12.977 | 12.141 | 1.00 | 62.04 | H0  |
| ANISOU15057 | H ASP E 153    | 6190    | 8550    | 8830   | 600  | 2090  | 40  |
| ATOM 15058  | HA ASP E 153   | -5.929  | -14.426 | 14.068 | 1.00 | 65.55 | H0  |
| ANISOU15058 | HA ASP E 153   | 6290    | 9070    | 9550   | 910  | 1920  | 140 |
| ATOM 15059  | HB2 ASP E 153  | -4.751  | -12.911 | 11.958 | 1.00 | 67.09 | H0  |
| ANISOU15059 | HB2 ASP E 153  | 6360    | 9400    | 9730   | 690  | 2260  | -10 |
| ATOM 15060  | HB3 ASP E 153  | -3.931  | -13.702 | 13.061 | 1.00 | 68.54 | H0  |
| ANISOU15060 | HB3 ASP E 153  | 6320    | 9640    | 10080  | 880  | 2150  | 40  |
| ATOM 15061  | N PRO E 154    | -5.150  | -12.365 | 15.422 | 1.00 | 68.37 | N0  |
| ANISOU15061 | N PRO E 154    | 6370    | 9690    | 9920   | 710  | 1710  | 190 |
| ATOM 15062  | CA PRO E 154   | -4.841  | -11.117 | 16.111 | 1.00 | 70.15 | C0  |
| ANISOU15062 | CA PRO E 154   | 6490    | 10040   | 10130  | 560  | 1600  | 200 |
| ATOM 15063  | C PRO E 154    | -3.853  | -10.320 | 15.248 | 1.00 | 74.30 | C0  |
| ANISOU15063 | C PRO E 154    | 6860    | 10660   | 10700  | 440  | 1750  | 140 |
| ATOM 15064  | O PRO E 154    | -3.049  | -10.941 | 14.568 | 1.00 | 77.59 | O0  |
| ANISOU15064 | O PRO E 154    | 7150    | 11110   | 11230  | 530  | 1900  | 100 |

|             |                |        |         |        |      |        |     |    |
|-------------|----------------|--------|---------|--------|------|--------|-----|----|
| ATOM 15065  | CB PRO E 154   | -4.233 | -11.579 | 17.442 | 1.00 | 70.64  |     | C0 |
| ANISOU15065 | CB PRO E 154   | 6370   | 10190   | 10290  | 680  | 1420   | 270 | C0 |
| ATOM 15066  | CG PRO E 154   | -3.631 | -12.935 | 17.124 | 1.00 | 71.65  |     | C0 |
| ANISOU15066 | CG PRO E 154   | 6400   | 10280   | 10540  | 900  | 1500   | 270 | C0 |
| ATOM 15067  | CD PRO E 154   | -4.525 | -13.535 | 16.058 | 1.00 | 70.05  |     | C0 |
| ANISOU15067 | CD PRO E 154   | 6450   | 9900    | 10260  | 920  | 1650   | 230 | C0 |
| ATOM 15068  | HA PRO E 154   | -5.669 | -10.602 | 16.273 | 1.00 | 68.68  |     | H0 |
| ANISOU15068 | HA PRO E 154   | 6450   | 9810    | 9830   | 470  | 1540   | 210 | H0 |
| ATOM 15069  | HB2 PRO E 154  | -3.542 | -10.954 | 17.750 | 1.00 | 71.49  |     | H0 |
| ANISOU15069 | HB2 PRO E 154  | 6320   | 10410   | 10440  | 610  | 1370   | 270 | H0 |
| ATOM 15070  | HB3 PRO E 154  | -4.922 | -11.658 | 18.136 | 1.00 | 69.57  |     | H0 |
| ANISOU15070 | HB3 PRO E 154  | 6340   | 10010   | 10080  | 680  | 1300   | 320 | H0 |
| ATOM 15071  | HG2 PRO E 154  | -2.715 | -12.838 | 16.791 | 1.00 | 73.19  |     | H0 |
| ANISOU15071 | HG2 PRO E 154  | 6410   | 10560   | 10830  | 920  | 1570   | 240 | H0 |
| ATOM 15072  | HG3 PRO E 154  | -3.616 | -13.503 | 17.921 | 1.00 | 72.00  |     | H0 |
| ANISOU15072 | HG3 PRO E 154  | 6420   | 10320   | 10620  | 1010 | 1380   | 330 | H0 |
| ATOM 15073  | HD2 PRO E 154  | -4.003 | -14.046 | 15.412 | 1.00 | 71.33  |     | H0 |
| ANISOU15073 | HD2 PRO E 154  | 6550   | 10050   | 10500  | 1010 | 1780   | 190 | H0 |
| ATOM 15074  | HD3 PRO E 154  | -5.199 | -14.118 | 16.453 | 1.00 | 69.38  |     | H0 |
| ANISOU15074 | HD3 PRO E 154  | 6490   | 9730    | 10140  | 980  | 1580   | 270 | H0 |
| ATOM 15075  | N THR E 155    | -3.947 | -8.988  | 15.267 | 1.00 | 76.81  |     | N0 |
| ANISOU15075 | N THR E 155    | 7220   | 11030   | 10940  | 230  | 1720   | 130 | N0 |
| ATOM 15076  | CA THR E 155   | -2.975 | -8.079  | 14.605 | 1.00 | 81.04  |     | C0 |
| ANISOU15076 | CA THR E 155   | 7620   | 11660   | 11510  | 70   | 1850   | 70  | C0 |
| ATOM 15077  | C THR E 155    | -1.596 | -8.336  | 15.218 | 1.00 | 86.12  |     | C0 |
| ANISOU15077 | C THR E 155    | 7910   | 12480   | 12330  | 130  | 1820   | 80  | C0 |
| ATOM 15078  | O THR E 155    | -1.537 | -8.638  | 16.428 | 1.00 | 86.97  |     | O0 |
| ANISOU15078 | O THR E 155    | 7930   | 12640   | 12480  | 220  | 1620   | 140 | O0 |
| ATOM 15079  | CB THR E 155   | -3.385 | -6.607  | 14.742 | 1.00 | 80.78  |     | C0 |
| ANISOU15079 | CB THR E 155   | 7720   | 11620   | 11360  | -160 | 1790   | 70  | C0 |
| ATOM 15080  | OG1 THR E 155  | -3.573 | -6.337  | 16.131 | 1.00 | 80.92  |     | O0 |
| ANISOU15080 | OG1 THR E 155  | 7700   | 11680   | 11360  | -160 | 1570   | 120 | O0 |
| ATOM 15081  | CG2 THR E 155  | -4.646 | -6.267  | 13.977 | 1.00 | 79.04  |     | C0 |
| ANISOU15081 | CG2 THR E 155  | 7820   | 11240   | 10970  | -210 | 1850   | 60  | C0 |
| ATOM 15082  | H THR E 155    | -4.613 | -8.540  | 15.697 | 1.00 | 75.46  |     | H0 |
| ANISOU15082 | H THR E 155    | 7170   | 10820   | 10680  | 170  | 1630   | 150 | H0 |
| ATOM 15083  | HA THR E 155   | -2.943 | -8.310  | 13.648 | 1.00 | 81.45  |     | H0 |
| ANISOU15083 | HA THR E 155   | 7720   | 11670   | 11560  | 80   | 2010   | 30  | H0 |
| ATOM 15084  | HB THR E 155   | -2.647 | -6.047  | 14.404 | 1.00 | 82.06  |     | H0 |
| ANISOU15084 | HB THR E 155   | 7770   | 11860   | 11550  | -270 | 1870   | 40  | H0 |
| ATOM 15085  | HG21 THR E 155 | -4.474 | -6.333  | 13.020 | 1.00 | 79.43  |     | H0 |
| ANISOU15085 | HG21 THR E 155 | 7900   | 11270   | 11010  | -230 | 2000   | 30  | H0 |
| ATOM 15086  | HG22 THR E 155 | -4.923 | -5.358  | 14.193 | 1.00 | 78.46  |     | H0 |
| ANISOU15086 | HG22 THR E 155 | 7830   | 11160   | 10820  | -330 | 1790   | 70  | H0 |
| ATOM 15087  | HG23 THR E 155 | -5.355 | -6.888  | 14.222 | 1.00 | 77.88  |     | H0 |
| ANISOU15087 | HG23 THR E 155 | 7760   | 11030   | 10790  | -100 | 1790   | 90  | H0 |
| ATOM 15088  | N THR E 156    | -0.535 | -8.221  | 14.417 | 1.00 | 90.96  |     | N0 |
| ANISOU15088 | N THR E 156    | 8320   | 13200   | 13040  | 80   | 2000   | 20  | N0 |
| ATOM 15089  | CA THR E 156   | 0.876  | -8.431  | 14.842 | 1.00 | 96.10  |     | C0 |
| ANISOU15089 | CA THR E 156   | 8590   | 14050   | 13870  | 140  | 1980   | 10  | C0 |
| ATOM 15090  | C THR E 156    | 1.294  | -7.349  | 15.853 | 1.00 | 98.76  |     | C0 |
| ANISOU15090 | C THR E 156    | 8800   | 14520   | 14210  | -50  | 1800   | 40  | C0 |
| ATOM 15091  | O THR E 156    | 2.381  | -7.499  | 16.447 | 1.00 | 101.52 |     | O0 |
| ANISOU15091 | O THR E 156    | 8820   | 15050   | 14700  | -10  | 1730   | 40  | O0 |

|             |                |        |         |        |       |        |      |    |
|-------------|----------------|--------|---------|--------|-------|--------|------|----|
| ATOM 15092  | CB THR E 156   | 1.804  | -8.491  | 13.620 | 1.00  | 98.01  |      | C0 |
| ANISOU15092 | CB THR E 156   | 8670   | 14370   | 14190  | 110   | 2260   | -70  | C0 |
| ATOM 15093  | OG1 THR E 156  | 1.310  | -7.580  | 12.637 | 1.00  | 97.14  |      | O0 |
| ANISOU15093 | OG1 THR E 156  | 8800   | 14180   | 13930  | -110  | 2400   | -100 | O0 |
| ATOM 15094  | CG2 THR E 156  | 1.897  | -9.878  | 13.021 | 1.00  | 98.57  |      | C0 |
| ANISOU15094 | CG2 THR E 156  | 8730   | 14380   | 14340  | 370   | 2390   | -90  | C0 |
| ATOM 15095  | H THR E 156    | -0.604 | -7.999  | 13.536 | 1.00  | 90.84  |      | H0 |
| ANISOU15095 | H THR E 156    | 8390   | 13140   | 12980  | 10    | 2140   | -20  | H0 |
| ATOM 15096  | HA THR E 156   | 0.919  | -9.303  | 15.298 | 1.00  | 96.24  |      | H0 |
| ANISOU15096 | HA THR E 156   | 8550   | 14060   | 13960  | 330   | 1910   | 40   | H0 |
| ATOM 15097  | HB THR E 156   | 2.707  | -8.204  | 13.899 | 1.00  | 99.82  |      | H0 |
| ANISOU15097 | HB THR E 156   | 8650   | 14760   | 14520  | 60    | 2240   | -80  | H0 |
| ATOM 15098  | HG21 THR E 156 | 2.258  | -10.495 | 13.682 | 1.00  | 99.45  |      | H0 |
| ANISOU15098 | HG21 THR E 156 | 8690   | 14540   | 14560  | 530   | 2290   | -60  | H0 |
| ATOM 15099  | HG22 THR E 156 | 2.482  | -9.858  | 12.242 | 1.00  | 100.07 |      | H0 |
| ANISOU15099 | HG22 THR E 156 | 8820   | 14630   | 14580  | 340   | 2580   | -150 | H0 |
| ATOM 15100  | HG23 THR E 156 | 1.009  | -10.176 | 12.751 | 1.00  | 96.95  |      | H0 |
| ANISOU15100 | HG23 THR E 156 | 8770   | 14030   | 14040  | 410   | 2400   | -80  | H0 |
| ATOM 15101  | N GLU E 157    | 0.462  | -6.318  | 16.058 | 1.00  | 99.29  |      | N0 |
| ANISOU15101 | N GLU E 157    | 9110   | 14500   | 14120  | -230  | 1720   | 50   | N0 |
| ATOM 15102  | CA GLU E 157   | 0.732  | -5.169  | 16.967 | 1.00  | 101.40 |      | C0 |
| ANISOU15102 | CA GLU E 157   | 9330   | 14850   | 14350  | -440  | 1560   | 60   | C0 |
| ATOM 15103  | C GLU E 157    | 0.566  | -5.596  | 18.431 | 1.00  | 101.62 |      | C0 |
| ANISOU15103 | C GLU E 157    | 9300   | 14920   | 14390  | -310  | 1290   | 120  | C0 |
| ATOM 15104  | O GLU E 157    | -0.561 | -5.496  | 18.957 | 1.00  | 98.59  |      | O0 |
| ANISOU15104 | O GLU E 157    | 9180   | 14400   | 13880  | -290  | 1180   | 160  | O0 |
| ATOM 15105  | CB GLU E 157   | -0.196 | -3.996  | 16.638 | 1.00  | 100.44 |      | C0 |
| ANISOU15105 | CB GLU E 157   | 9530   | 14580   | 14050  | -640  | 1570   | 50   | C0 |
| ATOM 15106  | CG GLU E 157   | 0.004  | -3.442  | 15.239 | 1.00  | 101.37 |      | C0 |
| ANISOU15106 | CG GLU E 157   | 9730   | 14660   | 14130  | -800  | 1820   | -10  | C0 |
| ATOM 15107  | CD GLU E 157   | -0.203 | -1.943  | 15.124 | 1.00  | 101.63 |      | C0 |
| ANISOU15107 | CD GLU E 157   | 9950   | 14640   | 14030  | -1070 | 1810   | -20  | C0 |
| ATOM 15108  | OE1 GLU E 157  | 0.804  | -1.220  | 14.981 | 1.00  | 102.89 |      | O0 |
| ANISOU15108 | OE1 GLU E 157  | 9940   | 14910   | 14240  | -1280 | 1880   | -50  | O0 |
| ATOM 15109  | OE2 GLU E 157  | -1.367 | -1.502  | 15.180 | 1.00  | 100.35 |      | O0 |
| ANISOU15109 | OE2 GLU E 157  | 10090  | 14310   | 13720  | -1080 | 1750   | 0    | O0 |
| ATOM 15110  | H GLU E 157    | -0.335 | -6.246  | 15.629 | 1.00  | 97.59  |      | H0 |
| ANISOU15110 | H GLU E 157    | 9120   | 14160   | 13800  | -250  | 1770   | 50   | H0 |
| ATOM 15111  | HA GLU E 157   | 1.664  | -4.881  | 16.829 | 1.00  | 103.21 |      | H0 |
| ANISOU15111 | HA GLU E 157   | 9340   | 15210   | 14660  | -530  | 1610   | 30   | H0 |
| ATOM 15112  | HB2 GLU E 157  | -1.125 | -4.294  | 16.732 | 1.00  | 98.55  |      | H0 |
| ANISOU15112 | HB2 GLU E 157  | 9480   | 14230   | 13730  | -550  | 1530   | 70   | H0 |
| ATOM 15113  | HB3 GLU E 157  | -0.040 | -3.281  | 17.290 | 1.00  | 100.61 |      | H0 |
| ANISOU15113 | HB3 GLU E 157  | 9530   | 14650   | 14040  | -760  | 1460   | 50   | H0 |
| ATOM 15114  | HG2 GLU E 157  | 0.913  | -3.654  | 14.938 | 1.00  | 103.18 |      | H0 |
| ANISOU15114 | HG2 GLU E 157  | 9730   | 15010   | 14460  | -800  | 1910   | -30  | H0 |
| ATOM 15115  | HG3 GLU E 157  | -0.621 | -3.889  | 14.628 | 1.00  | 100.27 |      | H0 |
| ANISOU15115 | HG3 GLU E 157  | 9740   | 14420   | 13940  | -700  | 1900   | -10  | H0 |
| ATOM 15116  | N ASNE 158     | 1.661  | -6.036  | 19.062 | 1.00  | 105.61 |      | N0 |
| ANISOU15116 | N ASNE 158     | 9480   | 15600   | 15050  | -230  | 1200   | 140  | N0 |
| ATOM 15117  | CA ASNE 158    | 1.755  | -6.298  | 20.524 | 1.00  | 106.89 |      | C0 |
| ANISOU15117 | CA ASNE 158    | 9550   | 15840   | 15220  | -140  | 930    | 200  | C0 |
| ATOM 15118  | C ASNE 158     | 2.109  | -4.980  | 21.226 | 1.00  | 107.70 |      | C0 |
| ANISOU15118 | C ASNE 158     | 9610   | 16050   | 15260  | -410  | 790    | 180  | C0 |

|                            |                      |                |    |
|----------------------------|----------------------|----------------|----|
| ATOM 15119 O ASN E 158     | 3.216 -4.882 21.803  | 1.00109.66     | O0 |
| ANISOU15119 O ASN E 158    | 9550 16500 15620     | -450 680 180   | O0 |
| ATOM 15120 CB ASN E 158    | 2.762 -7.411 20.838  | 1.00109.45     | C0 |
| ANISOU15120 CB ASN E 158   | 9550 16310 15720     | 90 880 230     | C0 |
| ATOM 15121 CG ASN E 158    | 2.395 -8.753 20.234  | 1.00108.82     | C0 |
| ANISOU15121 CG ASN E 158   | 9550 16100 15690     | 360 1000 250   | C0 |
| ATOM 15122 OD1 ASN E 158   | 1.339 -8.902 19.622  | 1.00107.09     | O0 |
| ANISOU15122 OD1 ASN E 158  | 9630 15690 15370     | 370 1110 240   | O0 |
| ATOM 15123 ND2 ASN E 158   | 3.263 -9.738 20.398  | 1.00110.41     | N0 |
| ANISOU15123 ND2 ASN E 158  | 9490 16400 16060     | 590 980 270    | N0 |
| ATOM 15124 H ASN E 158     | 2.438 -6.205 18.617  | 1.00107.03     | H0 |
| ANISOU15124 H ASN E 158    | 9460 15880 15330     | -220 1300 110  | H0 |
| ATOM 15125 HA ASN E 158    | 0.871 -6.596 20.843  | 1.00105.02     | H0 |
| ANISOU15125 HA ASN E 158   | 9520 15480 14900     | -60 860 240    | H0 |
| ATOM 15126 HB2 ASN E 158   | 3.637 -7.143 20.499  | 1.00111.19     | H0 |
| ANISOU15126 HB2 ASN E 158  | 9550 16660 16040     | 20 950 190     | H0 |
| ATOM 15127 HB3 ASN E 158   | 2.831 -7.509 21.809  | 1.00109.70     | H0 |
| ANISOU15127 HB3 ASN E 158  | 9540 16390 15750     | 130 690 280    | H0 |
| ATOM 15128 HD21 ASN E 158  | 3.101 -10.533 20.048 | 1.00110.51     | H0 |
| ANISOU15128 HD21 ASN E 158 | 9550 16340 16110     | 750 1050 280   | H0 |
| ATOM 15129 HD22 ASN E 158  | 4.007 -9.601 20.857  | 1.00112.29     | H0 |
| ANISOU15129 HD22 ASN E 158 | 9500 16790 16370     | 580 880 280    | H0 |
| ATOM 15130 N SER E 159     | 1.192 -4.005 21.173  | 1.00105.91     | N0 |
| ANISOU15130 N SER E 159    | 9690 15680 14870     | -580 790 160   | N0 |
| ATOM 15131 CA SER E 159    | 1.346 -2.638 21.739  | 1.00106.03     | C0 |
| ANISOU15131 CA SER E 159   | 9750 15730 14800     | -860 690 130   | C0 |
| ATOM 15132 C SER E 159     | 1.276 -2.699 23.270  | 1.00105.50     | C0 |
| ANISOU15132 C SER E 159    | 9670 15730 14690     | -810 410 170   | C0 |
| ATOM 15133 O SER E 159     | 1.165 -3.818 23.815  | 1.00105.62     | O0 |
| ANISOU15133 O SER E 159    | 9620 15760 14750     | -580 310 240   | O0 |
| ATOM 15134 CB SER E 159    | 0.301 -1.702 21.179  | 1.00103.86     | C0 |
| ANISOU15134 CB SER E 159   | 9840 15260 14360     | -1000 780 100  | C0 |
| ATOM 15135 OG SER E 159    | -0.982 -1.993 21.715 | 1.00101.82     | O0 |
| ANISOU15135 OG SER E 159   | 9840 14860 13980     | -860 690 140   | O0 |
| ATOM 15136 H SER E 159     | 0.377 -4.121 20.783  | 1.00104.10     | H0 |
| ANISOU15136 H SER E 159    | 9670 15310 14570     | -540 860 160   | H0 |
| ATOM 15137 HA SER E 159    | 2.245 -2.297 21.481  | 1.00107.77     | H0 |
| ANISOU15137 HA SER E 159   | 9780 16070 15100     | -980 740 100   | H0 |
| ATOM 15138 HB2 SER E 159   | 0.544 -0.773 21.395  | 1.00104.66     | H0 |
| ANISOU15138 HB2 SER E 159  | 9960 15380 14420     | -1190 740 70   | H0 |
| ATOM 15139 HB3 SER E 159   | 0.275 -1.791 20.199  | 1.00103.78     | H0 |
| ANISOU15139 HB3 SER E 159  | 9860 15200 14370     | -1000 950 80   | H0 |
| ATOM 15140 N ASP E 160     | 1.348 -1.539 23.933  | 1.00104.75     | N0 |
| ANISOU15140 N ASP E 160    | 9640 15650 14500     | -1040 290 140  | N0 |
| ATOM 15141 CA ASP E 160    | 1.103 -1.406 25.394  | 1.00103.04     | C0 |
| ANISOU15141 CA ASP E 160   | 9490 15470 14190     | -1040 30 170   | C0 |
| ATOM 15142 C ASP E 160     | -0.325 -1.894 25.656 | 1.00 98.98     | C0 |
| ANISOU15142 C ASP E 160    | 9280 14780 13550     | -870 20 210    | C0 |
| ATOM 15143 O ASP E 160     | -1.255 -1.406 24.979 | 1.00 98.19     | O0 |
| ANISOU15143 O ASP E 160    | 9450 14510 13350     | -910 150 180   | O0 |
| ATOM 15144 CB ASP E 160    | 1.336 0.026 25.890   | 1.00104.15     | C0 |
| ANISOU15144 CB ASP E 160   | 9710 15630 14230     | -1340 -60 110  | C0 |
| ATOM 15145 CG ASP E 160    | 1.387 0.152 27.404   | 1.00104.82     | C0 |
| ANISOU15145 CG ASP E 160   | 9800 15790 14230     | -1360 -330 120 | C0 |

|                           |        |        |        |            |      |     |    |
|---------------------------|--------|--------|--------|------------|------|-----|----|
| ATOM 15146 OD1 ASP E 160  | 2.193  | -0.567 | 28.020 | 1.00107.48 |      |     | O0 |
| ANISOU15146 OD1 ASP E 160 | 9860   | 16310  | 14660  | -1260      | -470 | 170 | O0 |
| ATOM 15147 OD2 ASP E 160  | 0.617  | 0.963  | 27.957 | 1.00103.26 |      |     | O0 |
| ANISOU15147 OD2 ASP E 160 | 9890   | 15480  | 13870  | -1460      | -400 | 90  | O0 |
| ATOM 15148 H ASP E 160    | 1.557  | -0.753 | 23.523 | 1.00105.09 |      |     | H0 |
| ANISOU15148 H ASP E 160   | 9720   | 15690  | 14520  | -1220      | 360  | 90  | H0 |
| ATOM 15149 HA ASP E 160   | 1.731  | -2.002 | 25.865 | 1.00104.46 |      |     | H0 |
| ANISOU15149 HA ASP E 160  | 9460   | 15780  | 14450  | -950       | -70  | 200 | H0 |
| ATOM 15150 HB2 ASP E 160  | 2.184  | 0.356  | 25.528 | 1.00105.75 |      |     | H0 |
| ANISOU15150 HB2 ASP E 160 | 9730   | 15930  | 14520  | -1470      | -10  | 70  | H0 |
| ATOM 15151 HB3 ASP E 160  | 0.620  | 0.601  | 25.557 | 1.00102.61 |      |     | H0 |
| ANISOU15151 HB3 ASP E 160 | 9760   | 15290  | 13940  | -1410      | 20   | 80  | H0 |
| ATOM 15152 N ASP E 161    | -0.477 | -2.858 | 26.564 | 1.0096.34  |      |     | N0 |
| ANISOU15152 N ASP E 161   | 8910   | 14480  | 13210  | -670       | -130 | 280 | N0 |
| ATOM 15153 CA ASP E 161   | -1.777 | -3.502 | 26.892 | 1.0091.96  |      |     | C0 |
| ANISOU15153 CA ASP E 161  | 8610   | 13780  | 12550  | -500       | -150 | 340 | C0 |
| ATOM 15154 C ASP E 161    | -2.712 | -2.434 | 27.475 | 1.0088.11  |      |     | C0 |
| ANISOU15154 C ASP E 161   | 8410   | 13200  | 11870  | -640       | -210 | 300 | C0 |
| ATOM 15155 O ASP E 161    | -3.876 | -2.352 | 27.035 | 1.0085.24  |      |     | O0 |
| ANISOU15155 O ASP E 161   | 8290   | 12680  | 11420  | -600       | -100 | 290 | O0 |
| ATOM 15156 CB ASP E 161   | -1.559 | -4.686 | 27.839 | 1.0093.15  |      |     | C0 |
| ANISOU15156 CB ASP E 161  | 8660   | 14010  | 12730  | -300       | -310 | 430 | C0 |
| ATOM 15157 CG ASP E 161   | -0.533 | -5.691 | 27.335 | 1.0095.09  |      |     | C0 |
| ANISOU15157 CG ASP E 161  | 8600   | 14350  | 13170  | -140       | -270 | 460 | C0 |
| ATOM 15158 OD1 ASP E 161  | -0.430 | -5.860 | 26.101 | 1.0094.55  |      |     | O0 |
| ANISOU15158 OD1 ASP E 161 | 8490   | 14230  | 13200  | -120       | -60  | 420 | O0 |
| ATOM 15159 OD2 ASP E 161  | 0.166  | -6.287 | 28.180 | 1.0097.25  |      |     | O0 |
| ANISOU15159 OD2 ASP E 161 | 8700   | 14750  | 13500  | -30        | -450 | 520 | O0 |
| ATOM 15160 H ASP E 161    | 0.220  | -3.171 | 27.059 | 1.0097.96  |      |     | H0 |
| ANISOU15160 H ASP E 161   | 8930   | 14810  | 13480  | -640       | -240 | 310 | H0 |
| ATOM 15161 HA ASP E 161   | -2.173 | -3.842 | 26.056 | 1.0090.83  |      |     | H0 |
| ANISOU15161 HA ASP E 161  | 8530   | 13550  | 12430  | -430       | 0    | 330 | H0 |
| ATOM 15162 HB2 ASP E 161  | -1.257 | -4.347 | 28.707 | 1.0094.06  |      |     | H0 |
| ANISOU15162 HB2 ASP E 161 | 8730   | 14200  | 12800  | -360       | -470 | 430 | H0 |
| ATOM 15163 HB3 ASP E 161  | -2.409 | -5.149 | 27.973 | 1.0091.47  |      |     | H0 |
| ANISOU15163 HB3 ASP E 161 | 8610   | 13690  | 12450  | -200       | -300 | 460 | H0 |
| ATOM 15164 N SER E 162    | -2.184 | -1.625 | 28.398 | 1.0087.53  |      |     | N0 |
| ANISOU15164 N SER E 162   | 8300   | 13220  | 11740  | -800       | -370 | 270 | N0 |
| ATOM 15165 CA SER E 162   | -2.889 | -0.547 | 29.138 | 1.0085.71  |      |     | C0 |
| ANISOU15165 CA SER E 162  | 8330   | 12910  | 11330  | -940       | -450 | 220 | C0 |
| ATOM 15166 C SER E 162    | -2.650 | 0.811  | 28.460 | 1.0083.96  |      |     | C0 |
| ANISOU15166 C SER E 162   | 8180   | 12630  | 11090  | -1180      | -360 | 130 | C0 |
| ATOM 15167 O SER E 162    | -2.552 | 1.818  | 29.193 | 1.0085.08  |      |     | O0 |
| ANISOU15167 O SER E 162   | 8430   | 12770  | 11120  | -1360      | -470 | 70  | O0 |
| ATOM 15168 CB SER E 162   | -2.417 | -0.542 | 30.579 | 1.0088.06  |      |     | C0 |
| ANISOU15168 CB SER E 162  | 8560   | 13340  | 11560  | -980       | -700 | 240 | C0 |
| ATOM 15169 OG SER E 162   | -3.141 | 0.390  | 31.367 | 1.0088.69  |      |     | O0 |
| ANISOU15169 OG SER E 162  | 8910   | 13340  | 11450  | -1090      | -770 | 180 | O0 |
| ATOM 15170 H SER E 162    | -1.311 | -1.687 | 28.651 | 1.0089.39  |      |     | H0 |
| ANISOU15170 H SER E 162   | 8340   | 13580  | 12050  | -840       | -450 | 270 | H0 |
| ATOM 15171 HA SER E 162   | -3.865 | -0.741 | 29.122 | 1.0084.01  |      |     | H0 |
| ANISOU15171 HA SER E 162  | 8300   | 12590  | 11030  | -850       | -410 | 230 | H0 |
| ATOM 15172 HB2 SER E 162  | -2.525 | -1.443 | 30.958 | 1.0087.93  |      |     | H0 |
| ANISOU15172 HB2 SER E 162 | 8500   | 13350  | 11560  | -820       | -750 | 300 | H0 |

|                           |        |        |        |       |       |      |    |
|---------------------------|--------|--------|--------|-------|-------|------|----|
| ATOM 15173 HB3 SER E 162  | -1.459 | -0.315 | 30.605 | 1.00  | 89.87 |      | H0 |
| ANISOU15173 HB3 SER E 162 | 8600   | 13680  | 11860  | -1080 | -750  | 220  | H0 |
| ATOM 15174 N GLU E 163    | -2.570 | 0.850  | 27.121 | 1.00  | 80.59 |      | N0 |
| ANISOU15174 N GLU E 163   | 7730   | 12140  | 10750  | -1200 | -150  | 110  | N0 |
| ATOM 15175 CA GLU E 163   | -2.110 | 2.041  | 26.348 | 1.00  | 79.48 |      | C0 |
| ANISOU15175 CA GLU E 163  | 7630   | 11960  | 10610  | -1440 | -50   | 40   | C0 |
| ATOM 15176 C GLU E 163    | -3.124 | 3.180  | 26.485 | 1.00  | 75.86 |      | C0 |
| ANISOU15176 C GLU E 163   | 7530   | 11310  | 9980   | -1540 | -40   | -10  | C0 |
| ATOM 15177 O GLU E 163    | -2.710 | 4.297  | 26.849 | 1.00  | 76.47 |      | O0 |
| ANISOU15177 O GLU E 163   | 7670   | 11380  | 10000  | -1760 | -100  | -70  | O0 |
| ATOM 15178 CB GLU E 163   | -1.919 | 1.721  | 24.864 | 1.00  | 79.54 |      | C0 |
| ANISOU15178 CB GLU E 163  | 7560   | 11930  | 10730  | -1410 | 180   | 40   | C0 |
| ATOM 15179 CG GLU E 163   | -1.370 | 2.895  | 24.067 | 1.00  | 81.06 |      | C0 |
| ANISOU15179 CG GLU E 163  | 7790   | 12090  | 10920  | -1680 | 300   | -20  | C0 |
| ATOM 15180 CD GLU E 163   | -0.860 | 2.556  | 22.676 | 1.00  | 81.94 |      | C0 |
| ANISOU15180 CD GLU E 163  | 7770   | 12220  | 11140  | -1680 | 520   | -20  | C0 |
| ATOM 15181 OE1 GLU E 163  | -1.282 | 1.520  | 22.123 | 1.00  | 81.02 |      | O0 |
| ANISOU15181 OE1 GLU E 163 | 7630   | 12080  | 11080  | -1460 | 610   | 20   | O0 |
| ATOM 15182 OE2 GLU E 163  | -0.039 | 3.334  | 22.150 | 1.00  | 83.68 |      | O0 |
| ANISOU15182 OE2 GLU E 163 | 7920   | 12480  | 11400  | -1920 | 600   | -60  | O0 |
| ATOM 15183 H GLU E 163    | -2.810 | 0.146  | 26.595 | 1.00  | 79.91 |      | H0 |
| ANISOU15183 H GLU E 163   | 7620   | 12030  | 10710  | -1070 | -70   | 140  | H0 |
| ATOM 15184 HA GLU E 163   | -1.250 | 2.339  | 26.722 | 1.00  | 81.24 |      | H0 |
| ANISOU15184 HA GLU E 163  | 7700   | 12300  | 10880  | -1570 | -130  | 20   | H0 |
| ATOM 15185 HB2 GLU E 163  | -1.305 | 0.966  | 24.781 | 1.00  | 80.34 |      | H0 |
| ANISOU15185 HB2 GLU E 163 | 7440   | 12140  | 10940  | -1330 | 180   | 70   | H0 |
| ATOM 15186 HB3 GLU E 163  | -2.782 | 1.453  | 24.486 | 1.00  | 77.81 |      | H0 |
| ANISOU15186 HB3 GLU E 163 | 7500   | 11600  | 10460  | -1300 | 250   | 60   | H0 |
| ATOM 15187 HG2 GLU E 163  | -2.074 | 3.572  | 23.977 | 1.00  | 80.20 |      | H0 |
| ANISOU15187 HG2 GLU E 163 | 7930   | 11840  | 10700  | -1720 | 320   | -40  | H0 |
| ATOM 15188 HG3 GLU E 163  | -0.635 | 3.303  | 24.573 | 1.00  | 82.77 |      | H0 |
| ANISOU15188 HG3 GLU E 163 | 7890   | 12400  | 11160  | -1820 | 210   | -40  | H0 |
| ATOM 15189 N TYR E 164    | -4.390 | 2.903  | 26.170 | 1.00  | 71.34 |      | N0 |
| ANISOU15189 N TYR E 164   | 7170   | 10600  | 9330   | -1370 | 30    | 10   | N0 |
| ATOM 15190 CA TYR E 164   | -5.504 | 3.885  | 26.169 | 1.00  | 69.20 |      | C0 |
| ANISOU15190 CA TYR E 164  | 7240   | 10150  | 8910   | -1400 | 60    | -40  | C0 |
| ATOM 15191 C TYR E 164    | -6.491 | 3.575  | 27.302 | 1.00  | 66.01 |      | C0 |
| ANISOU15191 C TYR E 164   | 6970   | 9730   | 8390   | -1250 | -60   | -30  | C0 |
| ATOM 15192 O TYR E 164    | -7.548 | 4.226  | 27.355 | 1.00  | 65.39 |      | O0 |
| ANISOU15192 O TYR E 164   | 7150   | 9510   | 8180   | -1220 | -30   | -60  | O0 |
| ATOM 15193 CB TYR E 164   | -6.203 | 3.882  | 24.807 | 1.00  | 68.44 |      | C0 |
| ANISOU15193 CB TYR E 164  | 7280   | 9910   | 8810   | -1330 | 250   | -30  | C0 |
| ATOM 15194 CG TYR E 164   | -5.314 | 4.221  | 23.636 | 1.00  | 70.39 |      | C0 |
| ANISOU15194 CG TYR E 164  | 7430   | 10160  | 9150   | -1480 | 390   | -40  | C0 |
| ATOM 15195 CD1 TYR E 164  | -4.557 | 5.383  | 23.623 | 1.00  | 72.76 |      | C0 |
| ANISOU15195 CD1 TYR E 164 | 7770   | 10440  | 9440   | -1740 | 380   | -90  | C0 |
| ATOM 15196 CD2 TYR E 164  | -5.241 | 3.391  | 22.527 | 1.00  | 70.23 |      | C0 |
| ANISOU15196 CD2 TYR E 164 | 7310   | 10150  | 9220   | -1380 | 540   | -10  | C0 |
| ATOM 15197 CE1 TYR E 164  | -3.745 | 5.709  | 22.547 | 1.00  | 74.29 |      | C0 |
| ANISOU15197 CE1 TYR E 164 | 7880   | 10640  | 9700   | -1900 | 530   | -100 | C0 |
| ATOM 15198 CE2 TYR E 164  | -4.436 | 3.703  | 21.442 | 1.00  | 71.80 |      | C0 |
| ANISOU15198 CE2 TYR E 164 | 7430   | 10360  | 9490   | -1520 | 680   | -20  | C0 |
| ATOM 15199 CZ TYR E 164   | -3.685 | 4.866  | 21.451 | 1.00  | 73.82 |      | C0 |
| ANISOU15199 CZ TYR E 164  | 7710   | 10610  | 9730   | -1790 | 680   | -70  | C0 |



|                           |         |        |        |       |       |      |    |
|---------------------------|---------|--------|--------|-------|-------|------|----|
| ATOM 15200 OH TYR E 164   | -2.889  | 5.180  | 20.386 | 1.00  | 75.88 |      | O0 |
| ANISOU15200 OH TYR E 164  | 7900    | 10880  | 10050  | -1950 | 850   | -80  | O0 |
| ATOM 15201 H TYR E 164    | -4.666  | 2.070  | 25.922 | 1.00  | 70.71 |      | H0 |
| ANISOU15201 H TYR E 164   | 7040    | 10530  | 9300   | -1220 | 80    | 50   | H0 |
| ATOM 15202 HA TYR E 164   | -5.129  | 4.788  | 26.326 | 1.00  | 70.28 |      | H0 |
| ANISOU15202 HA TYR E 164  | 7440    | 10260  | 9010   | -1570 | 30    | -90  | H0 |
| ATOM 15203 HB2 TYR E 164  | -6.592  | 2.994  | 24.662 | 1.00  | 67.42 |      | H0 |
| ANISOU15203 HB2 TYR E 164 | 7100    | 9800   | 8720   | -1170 | 270   | 10   | H0 |
| ATOM 15204 HB3 TYR E 164  | -6.940  | 4.528  | 24.837 | 1.00  | 67.89 |      | H0 |
| ANISOU15204 HB3 TYR E 164 | 7420    | 9730   | 8650   | -1330 | 250   | -60  | H0 |
| ATOM 15205 HD1 TYR E 164  | -4.592  | 5.964  | 24.364 | 1.00  | 73.25 |      | H0 |
| ANISOU15205 HD1 TYR E 164 | 7910    | 10490  | 9430   | -1810 | 280   | -130 | H0 |
| ATOM 15206 HD2 TYR E 164  | -5.750  | 2.598  | 22.509 | 1.00  | 69.06 |      | H0 |
| ANISOU15206 HD2 TYR E 164 | 7150    | 10010  | 9090   | -1220 | 540   | 30   | H0 |
| ATOM 15207 HE1 TYR E 164  | -3.237  | 6.503  | 22.560 | 1.00  | 75.62 |      | H0 |
| ANISOU15207 HE1 TYR E 164 | 8080    | 10800  | 9850   | -2090 | 520   | -140 | H0 |
| ATOM 15208 HE2 TYR E 164  | -4.399  | 3.124  | 20.699 | 1.00  | 71.36 |      | H0 |
| ANISOU15208 HE2 TYR E 164 | 7310    | 10310  | 9490   | -1450 | 790   | 0    | H0 |
| ATOM 15209 N PHE E 165    | -6.168  | 2.626  | 28.187 | 1.00  | 64.39 |      | N0 |
| ANISOU15209 N PHE E 165   | 6590    | 9660   | 8210   | -1160 | -180  | 20   | N0 |
| ATOM 15210 CA PHE E 165   | -7.038  | 2.263  | 29.338 | 1.00  | 62.23 |      | C0 |
| ANISOU15210 CA PHE E 165  | 6440    | 9390   | 7810   | -1040 | -290  | 40   | C0 |
| ATOM 15211 C PHE E 165    | -7.081  | 3.445  | 30.310 | 1.00  | 61.39 |      | C0 |
| ANISOU15211 C PHE E 165   | 6500    | 9260   | 7560   | -1190 | -400  | -40  | C0 |
| ATOM 15212 O PHE E 165    | -6.016  | 3.992  | 30.634 | 1.00  | 62.81 |      | O0 |
| ANISOU15212 O PHE E 165   | 6580    | 9520   | 7770   | -1370 | -490  | -70  | O0 |
| ATOM 15213 CB PHE E 165   | -6.568  | 0.985  | 30.037 | 1.00  | 62.77 |      | C0 |
| ANISOU15213 CB PHE E 165  | 6300    | 9610   | 7940   | -920  | -400  | 120  | C0 |
| ATOM 15214 CG PHE E 165   | -7.522  | 0.508  | 31.103 | 1.00  | 62.01 |      | C0 |
| ANISOU15214 CG PHE E 165  | 6340    | 9510   | 7710   | -800  | -480  | 160  | C0 |
| ATOM 15215 CD1 PHE E 165  | -8.621  | -0.273 | 30.776 | 1.00  | 60.30 |      | C0 |
| ANISOU15215 CD1 PHE E 165 | 6210    | 9220   | 7480   | -630  | -380  | 200  | C0 |
| ATOM 15216 CD2 PHE E 165  | -7.351  | 0.880  | 32.427 | 1.00  | 63.31 |      | C0 |
| ANISOU15216 CD2 PHE E 165 | 6560    | 9740   | 7760   | -870  | -650  | 140  | C0 |
| ATOM 15217 CE1 PHE E 165  | -9.507  | -0.700 | 31.753 | 1.00  | 59.33 |      | C0 |
| ANISOU15217 CE1 PHE E 165 | 6210    | 9100   | 7220   | -540  | -440  | 230  | C0 |
| ATOM 15218 CE2 PHE E 165  | -8.239  | 0.455  | 33.402 | 1.00  | 62.41 |      | C0 |
| ANISOU15218 CE2 PHE E 165 | 6590    | 9620   | 7500   | -770  | -710  | 170  | C0 |
| ATOM 15219 CZ PHE E 165   | -9.315  | -0.333 | 33.064 | 1.00  | 60.57 |      | C0 |
| ANISOU15219 CZ PHE E 165  | 6430    | 9330   | 7260   | -610  | -600  | 210  | C0 |
| ATOM 15220 H PHE E 165    | -5.399  | 2.140  | 28.158 | 1.00  | 65.36 |      | H0 |
| ANISOU15220 H PHE E 165   | 6520    | 9890   | 8430   | -1160 | -210  | 50   | H0 |
| ATOM 15221 HA PHE E 165   | -7.954  | 2.110  | 28.996 | 1.00  | 60.67 |      | H0 |
| ANISOU15221 HA PHE E 165  | 6360    | 9110   | 7580   | -940  | -210  | 50   | H0 |
| ATOM 15222 HB2 PHE E 165  | -6.461  | 0.280  | 29.364 | 1.00  | 62.26 |      | H0 |
| ANISOU15222 HB2 PHE E 165 | 6130    | 9550   | 7980   | -830  | -320  | 170  | H0 |
| ATOM 15223 HB3 PHE E 165  | -5.692  | 1.153  | 30.443 | 1.00  | 64.28 |      | H0 |
| ANISOU15223 HB3 PHE E 165 | 6360    | 9890   | 8170   | -1010 | -500  | 120  | H0 |
| ATOM 15224 HD1 PHE E 165  | -8.757  | -0.530 | 29.878 | 1.00  | 59.36 |      | H0 |
| ANISOU15224 HD1 PHE E 165 | 6070    | 9060   | 7430   | -580  | -270  | 210  | H0 |
| ATOM 15225 HD2 PHE E 165  | -6.614  | 1.419  | 32.667 | 1.00  | 64.55 |      | H0 |
| ANISOU15225 HD2 PHE E 165 | 6660    | 9950   | 7920   | -1000 | -730  | 110  | H0 |
| ATOM 15226 HE1 PHE E 165  | -10.244 | -1.240 | 31.517 | 1.00  | 58.34 |      | H0 |
| ANISOU15226 HE1 PHE E 165 | 6140    | 8940   | 7090   | -440  | -370  | 250  | H0 |

|                           |         |        |        |       |       |      |    |
|---------------------------|---------|--------|--------|-------|-------|------|----|
| ATOM 15227 HE2 PHE E 165  | -8.104  | 0.706  | 34.298 | 1.00  | 63.44 |      | H0 |
| ANISOU15227 HE2 PHE E 165 | 6760    | 9800   | 7540   | -820  | -820  | 150  | H0 |
| ATOM 15228 HZ PHE E 165   | -9.918  | -0.622 | 33.730 | 1.00  | 60.36 |      | H0 |
| ANISOU15228 HZ PHE E 165  | 6490    | 9310   | 7130   | -550  | -630  | 230  | H0 |
| ATOM 15229 N SER E 166    | -8.285  | 3.825  | 30.745 | 1.00  | 59.03 |      | N0 |
| ANISOU15229 N SER E 166   | 6450    | 8860   | 7120   | -1120 | -390  | -70  | N0 |
| ATOM 15230 CA SER E 166   | -8.549  | 5.001  | 31.618 | 1.00  | 59.17 |      | C0 |
| ANISOU15230 CA SER E 166  | 6700    | 8810   | 6980   | -1230 | -470  | -160 | C0 |
| ATOM 15231 C SER E 166    | -7.730  | 4.894  | 32.911 | 1.00  | 59.98 |      | C0 |
| ANISOU15231 C SER E 166   | 6700    | 9060   | 7030   | -1330 | -670  | -160 | C0 |
| ATOM 15232 O SER E 166    | -7.783  | 3.834  | 33.566 | 1.00  | 58.97 |      | O0 |
| ANISOU15232 O SER E 166   | 6470    | 9040   | 6900   | -1210 | -740  | -90  | O0 |
| ATOM 15233 CB SER E 166   | -10.024 | 5.140  | 31.915 | 1.00  | 57.60 |      | C0 |
| ANISOU15233 CB SER E 166  | 6730    | 8510   | 6640   | -1080 | -420  | -190 | C0 |
| ATOM 15234 OG SER E 166   | -10.279 | 6.289  | 32.711 | 1.00  | 58.61 |      | O0 |
| ANISOU15234 OG SER E 166  | 7090    | 8560   | 6620   | -1180 | -470  | -290 | O0 |
| ATOM 15235 H SER E 166    | -9.049  | 3.377  | 30.535 | 1.00  | 57.88 |      | H0 |
| ANISOU15235 H SER E 166   | 6360    | 8670   | 6960   | -990  | -330  | -50  | H0 |
| ATOM 15236 HA SER E 166   | -8.251  | 5.814  | 31.129 | 1.00  | 59.67 |      | H0 |
| ANISOU15236 HA SER E 166  | 6820    | 8800   | 7050   | -1350 | -430  | -210 | H0 |
| ATOM 15237 HB2 SER E 166  | -10.522 | 5.210  | 31.069 | 1.00  | 56.62 |      | H0 |
| ANISOU15237 HB2 SER E 166 | 6660    | 8300   | 6550   | -1020 | -300  | -190 | H0 |
| ATOM 15238 HB3 SER E 166  | -10.338 | 4.337  | 32.389 | 1.00  | 57.12 |      | H0 |
| ANISOU15238 HB3 SER E 166 | 6620    | 8520   | 6560   | -980  | -450  | -140 | H0 |
| ATOM 15239 N GLN E 167    | -7.001  | 5.962  | 33.250 | 1.00  | 61.13 |      | N0 |
| ANISOU15239 N GLN E 167   | 6900    | 9190   | 7130   | -1550 | -750  | -240 | N0 |
| ATOM 15240 CA GLN E 167   | -6.316  | 6.148  | 34.560 | 1.00  | 62.85 |      | C0 |
| ANISOU15240 CA GLN E 167  | 7090    | 9530   | 7260   | -1680 | -950  | -270 | C0 |
| ATOM 15241 C GLN E 167    | -7.356  | 6.279  | 35.687 | 1.00  | 62.03 |      | C0 |
| ANISOU15241 C GLN E 167   | 7230    | 9390   | 6950   | -1590 | -1000 | -300 | C0 |
| ATOM 15242 O GLN E 167    | -6.974  | 6.089  | 36.857 | 1.00  | 62.25 |      | O0 |
| ANISOU15242 O GLN E 167   | 7240    | 9530   | 6880   | -1630 | -1170 | -300 | O0 |
| ATOM 15243 CB GLN E 167   | -5.405  | 7.379  | 34.521 | 1.00  | 65.12 |      | C0 |
| ANISOU15243 CB GLN E 167  | 7410    | 9790   | 7540   | -1960 | -1000 | -360 | C0 |
| ATOM 15244 CG GLN E 167   | -6.115  | 8.662  | 34.103 | 1.00  | 65.07 |      | C0 |
| ANISOU15244 CG GLN E 167  | 7730    | 9550   | 7440   | -2030 | -890  | -450 | C0 |
| ATOM 15245 CD GLN E 167   | -5.232  | 9.879  | 34.220 | 1.00  | 67.56 |      | C0 |
| ANISOU15245 CD GLN E 167  | 8120    | 9830   | 7720   | -2340 | -950  | -550 | C0 |
| ATOM 15246 OE1 GLN E 167  | -4.856  | 10.491 | 33.223 | 1.00  | 67.61 |      | O0 |
| ANISOU15246 OE1 GLN E 167 | 8140    | 9740   | 7810   | -2470 | -850  | -570 | O0 |
| ATOM 15247 NE2 GLN E 167  | -4.896  | 10.241 | 35.449 | 1.00  | 69.48 |      | N0 |
| ANISOU15247 NE2 GLN E 167 | 8430    | 10130  | 7840   | -2460 | -1130 | -610 | N0 |
| ATOM 15248 H GLN E 167    | -6.863  | 6.647  | 32.669 | 1.00  | 61.48 |      | H0 |
| ANISOU15248 H GLN E 167   | 7010    | 9160   | 7200   | -1650 | -680  | -280 | H0 |
| ATOM 15249 HA GLN E 167   | -5.764  | 5.351  | 34.735 | 1.00  | 63.20 |      | H0 |
| ANISOU15249 HA GLN E 167  | 6930    | 9710   | 7380   | -1640 | -1020 | -200 | H0 |
| ATOM 15250 HB2 GLN E 167  | -5.016  | 7.505  | 35.412 | 1.00  | 66.54 |      | H0 |
| ANISOU15250 HB2 GLN E 167 | 7580    | 10050  | 7650   | -2050 | -1150 | -380 | H0 |
| ATOM 15251 HB3 GLN E 167  | -4.671  | 7.202  | 33.897 | 1.00  | 65.56 |      | H0 |
| ANISOU15251 HB3 GLN E 167 | 7270    | 9910   | 7730   | -2020 | -980  | -330 | H0 |
| ATOM 15252 HG2 GLN E 167  | -6.416  | 8.578  | 33.174 | 1.00  | 63.86 |      | H0 |
| ANISOU15252 HG2 GLN E 167 | 7580    | 9330   | 7360   | -1960 | -760  | -430 | H0 |
| ATOM 15253 HG3 GLN E 167  | -6.909  | 8.790  | 34.664 | 1.00  | 64.55 |      | H0 |
| ANISOU15253 HG3 GLN E 167 | 7840    | 9430   | 7250   | -1940 | -900  | -480 | H0 |

|                            |         |        |        |       |       |      |    |
|----------------------------|---------|--------|--------|-------|-------|------|----|
| ATOM 15254 HE21 GLN E 167  | -4.379  | 10.947 | 35.576 | 1.00  | 71.02 |      | H0 |
| ANISOU15254 HE21 GLN E 167 | 8670    | 10310  | 8010   | -2650 | -1180 | -670 | H0 |
| ATOM 15255 HE22 GLN E 167  | -5.188  | 9.777  | 36.143 | 1.00  | 69.19 |      | H0 |
| ANISOU15255 HE22 GLN E 167 | 8390    | 10160  | 7740   | -2360 | -1200 | -590 | H0 |
| ATOM 15256 N TYR E 168     | -8.617  | 6.583  | 35.348 | 1.00  | 60.17 |      | N0 |
| ANISOU15256 N TYR E 168    | 7220    | 9000   | 6650   | -1460 | -860  | -340 | N0 |
| ATOM 15257 CA TYR E 168    | -9.707  | 6.911  | 36.306 | 1.00  | 59.81 |      | C0 |
| ANISOU15257 CA TYR E 168   | 7430    | 8890   | 6400   | -1380 | -870  | -400 | C0 |
| ATOM 15258 C TYR E 168     | -10.586 | 5.686  | 36.591 | 1.00  | 57.99 |      | C0 |
| ANISOU15258 C TYR E 168    | 7150    | 8740   | 6150   | -1160 | -830  | -310 | C0 |
| ATOM 15259 O TYR E 168     | -11.504 | 5.803  | 37.415 | 1.00  | 58.20 |      | O0 |
| ANISOU15259 O TYR E 168    | 7350    | 8750   | 6010   | -1090 | -820  | -350 | O0 |
| ATOM 15260 CB TYR E 168    | -10.539 | 8.079  | 35.770 | 1.00  | 59.40 |      | C0 |
| ANISOU15260 CB TYR E 168   | 7640    | 8640   | 6290   | -1370 | -740  | -500 | C0 |
| ATOM 15261 CG TYR E 168    | -9.740  | 9.335  | 35.532 | 1.00  | 60.90 |      | C0 |
| ANISOU15261 CG TYR E 168   | 7940    | 8720   | 6480   | -1610 | -770  | -580 | C0 |
| ATOM 15262 CD1 TYR E 168   | -9.093  | 9.975  | 36.577 | 1.00  | 62.85 |      | C0 |
| ANISOU15262 CD1 TYR E 168  | 8270    | 9000   | 6610   | -1790 | -920  | -660 | C0 |
| ATOM 15263 CD2 TYR E 168   | -9.615  | 9.875  | 34.262 | 1.00  | 60.45 |      | C0 |
| ANISOU15263 CD2 TYR E 168  | 7900    | 8540   | 6530   | -1650 | -650  | -590 | C0 |
| ATOM 15264 CE1 TYR E 168   | -8.343  | 11.120 | 36.368 | 1.00  | 64.77 |      | C0 |
| ANISOU15264 CE1 TYR E 168  | 8610    | 9150   | 6850   | -2040 | -950  | -740 | C0 |
| ATOM 15265 CE2 TYR E 168   | -8.872  | 11.023 | 34.037 | 1.00  | 62.21 |      | C0 |
| ANISOU15265 CE2 TYR E 168  | 8240    | 8650   | 6750   | -1890 | -670  | -660 | C0 |
| ATOM 15266 CZ TYR E 168    | -8.236  | 11.649 | 35.094 | 1.00  | 64.23 |      | C0 |
| ANISOU15266 CZ TYR E 168   | 8570    | 8940   | 6890   | -2090 | -820  | -740 | C0 |
| ATOM 15267 OH TYR E 168    | -7.508  | 12.783 | 34.882 | 1.00  | 66.23 |      | O0 |
| ANISOU15267 OH TYR E 168   | 8950    | 9080   | 7140   | -2350 | -840  | -820 | O0 |
| ATOM 15268 H TYR E 168     | -8.901  | 6.626  | 34.485 | 1.00  | 59.17 |      | H0 |
| ANISOU15268 H TYR E 168    | 7100    | 8800   | 6590   | -1410 | -750  | -330 | H0 |
| ATOM 15269 HA TYR E 168    | -9.293  | 7.194  | 37.161 | 1.00  | 61.26 |      | H0 |
| ANISOU15269 HA TYR E 168   | 7650    | 9130   | 6500   | -1480 | -990  | -430 | H0 |
| ATOM 15270 HB2 TYR E 168   | -10.958 | 7.803  | 34.929 | 1.00  | 58.00 |      | H0 |
| ANISOU15270 HB2 TYR E 168  | 7430    | 8410   | 6190   | -1270 | -630  | -460 | H0 |
| ATOM 15271 HB3 TYR E 168   | -11.253 | 8.274  | 36.412 | 1.00  | 59.41 |      | H0 |
| ANISOU15271 HB3 TYR E 168  | 7800    | 8610   | 6170   | -1310 | -730  | -540 | H0 |
| ATOM 15272 HD1 TYR E 168   | -9.160  | 9.620  | 37.448 | 1.00  | 63.34 |      | H0 |
| ANISOU15272 HD1 TYR E 168  | 8320    | 9150   | 6590   | -1770 | -1000 | -660 | H0 |
| ATOM 15273 HD2 TYR E 168   | -10.045 | 9.455  | 33.536 | 1.00  | 59.04 |      | H0 |
| ANISOU15273 HD2 TYR E 168  | 7670    | 8340   | 6420   | -1530 | -550  | -540 | H0 |
| ATOM 15274 HE1 TYR E 168   | -7.915  | 11.544 | 37.093 | 1.00  | 66.35 |      | H0 |
| ANISOU15274 HE1 TYR E 168  | 8880    | 9370   | 6970   | -2180 | -1060 | -800 | H0 |
| ATOM 15275 HE2 TYR E 168   | -8.803  | 11.379 | 33.167 | 1.00  | 61.98 |      | H0 |
| ANISOU15275 HE2 TYR E 168  | 8240    | 8530   | 6780   | -1930 | -580  | -660 | H0 |
| ATOM 15276 N SER E 169     | -10.326 | 4.549  | 35.941 | 1.00  | 56.69 |      | N0 |
| ANISOU15276 N SER E 169    | 6750    | 8650   | 6140   | -1070 | -800  | -200 | N0 |
| ATOM 15277 CA SER E 169    | -10.971 | 3.248  | 36.258 | 1.00  | 55.27 |      | C0 |
| ANISOU15277 CA SER E 169   | 6510    | 8540   | 5950   | -890  | -780  | -100 | C0 |
| ATOM 15278 C SER E 169     | -10.669 | 2.888  | 37.718 | 1.00  | 56.97 |      | C0 |
| ANISOU15278 C SER E 169    | 6740    | 8880   | 6030   | -920  | -950  | -80  | C0 |
| ATOM 15279 O SER E 169     | -9.676  | 3.407  | 38.259 | 1.00  | 58.40 |      | O0 |
| ANISOU15279 O SER E 169    | 6890    | 9120   | 6180   | -1070 | -1100 | -110 | O0 |
| ATOM 15280 CB SER E 169    | -10.506 | 2.168  | 35.314 | 1.00  | 53.87 |      | C0 |
| ANISOU15280 CB SER E 169   | 6100    | 8410   | 5960   | -810  | -730  | 0    | C0 |

|             |                |         |        |        |       |       |      |    |
|-------------|----------------|---------|--------|--------|-------|-------|------|----|
| ATOM 15281  | OG SER E 169   | -11.100 | 0.916  | 35.620 | 1.00  | 52.48 | O0   |    |
| ANISOU15281 | OG SER E 169   | 5890    | 8280   | 5770   | -650  | -720  | 100  | O0 |
| ATOM 15282  | H SER E 169    | -9.737  | 4.487  | 35.249 | 1.00  | 56.65 | H0   |    |
| ANISOU15282 | H SER E 169    | 6620    | 8650   | 6250   | -1110 | -780  | -180 | H0 |
| ATOM 15283  | HA SER E 169   | -11.955 | 3.356  | 36.159 | 1.00  | 54.32 | H0   |    |
| ANISOU15283 | HA SER E 169   | 6510    | 8360   | 5770   | -800  | -680  | -130 | H0 |
| ATOM 15284  | HB2 SER E 169  | -10.736 | 2.422  | 34.392 | 1.00  | 52.98 | H0   |    |
| ANISOU15284 | HB2 SER E 169  | 5990    | 8210   | 5920   | -790  | -620  | -20  | H0 |
| ATOM 15285  | HB3 SER E 169  | -9.529  | 2.088  | 35.372 | 1.00  | 54.94 | H0   |    |
| ANISOU15285 | HB3 SER E 169  | 6100    | 8610   | 6170   | -880  | -820  | 20   | H0 |
| ATOM 15286  | N ARG E 170    | -11.518 | 2.063  | 38.336 | 1.00  | 57.05 | N0   |    |
| ANISOU15286 | N ARG E 170    | 6810    | 8920   | 5940   | -790  | -930  | -20  | N0 |
| ATOM 15287  | CA ARG E 170   | -11.249 | 1.428  | 39.657 | 1.00  | 59.09 | C0   |    |
| ANISOU15287 | CA ARG E 170   | 7080    | 9310   | 6070   | -800  | -1090 | 40   | C0 |
| ATOM 15288  | C ARG E 170    | -10.169 | 0.359  | 39.473 | 1.00  | 59.01 | C0   |    |
| ANISOU15288 | C ARG E 170    | 6810    | 9400   | 6210   | -760  | -1200 | 170  | C0 |
| ATOM 15289  | O ARG E 170    | -9.422  | 0.101  | 40.431 | 1.00  | 60.57 | O0   |    |
| ANISOU15289 | O ARG E 170    | 6970    | 9710   | 6340   | -810  | -1390 | 210  | O0 |
| ATOM 15290  | CB ARG E 170   | -12.500 | 0.756  | 40.234 | 1.00  | 58.82 | C0   |    |
| ANISOU15290 | CB ARG E 170   | 7180    | 9280   | 5900   | -670  | -1010 | 80   | C0 |
| ATOM 15291  | CG ARG E 170   | -13.326 | 1.634  | 41.161 | 1.00  | 60.17 | C0   |    |
| ANISOU15291 | CG ARG E 170   | 7600    | 9420   | 5840   | -710  | -980  | -30  | C0 |
| ATOM 15292  | CD ARG E 170   | -14.493 | 0.851  | 41.733 | 1.00  | 60.30 | C0   |    |
| ANISOU15292 | CD ARG E 170   | 7710    | 9470   | 5730   | -600  | -890  | 10   | C0 |
| ATOM 15293  | NE ARG E 170   | -15.390 | 0.411  | 40.671 | 1.00  | 58.99 | N0   |    |
| ANISOU15293 | NE ARG E 170   | 7480    | 9250   | 5690   | -480  | -710  | 40   | N0 |
| ATOM 15294  | CZ ARG E 170   | -16.341 | -0.513 | 40.795 | 1.00  | 58.61 | C0   |    |
| ANISOU15294 | CZ ARG E 170   | 7440    | 9230   | 5600   | -380  | -610  | 100  | C0 |
| ATOM 15295  | NH1 ARG E 170  | -16.537 | -1.126 | 41.952 | 1.00  | 59.86 | N0   |    |
| ANISOU15295 | NH1 ARG E 170  | 7690    | 9470   | 5590   | -390  | -670  | 160  | N0 |
| ATOM 15296  | NH2 ARG E 170  | -17.090 | -0.823 | 39.747 | 1.00  | 56.74 | N0   |    |
| ANISOU15296 | NH2 ARG E 170  | 7140    | 8940   | 5480   | -290  | -460  | 110  | N0 |
| ATOM 15297  | H ARG E 170    | -12.325 | 1.839  | 37.977 | 1.00  | 55.84 | H0   |    |
| ANISOU15297 | H ARG E 170    | 6700    | 8730   | 5790   | -700  | -820  | -10  | H0 |
| ATOM 15298  | HA ARG E 170   | -10.925 | 2.115  | 40.284 | 1.00  | 60.24 | H0   |    |
| ANISOU15298 | HA ARG E 170   | 7300    | 9470   | 6120   | -900  | -1180 | -20  | H0 |
| ATOM 15299  | HB2 ARG E 170  | -13.065 | 0.463  | 39.491 | 1.00  | 57.44 | H0   |    |
| ANISOU15299 | HB2 ARG E 170  | 6970    | 9050   | 5800   | -590  | -880  | 100  | H0 |
| ATOM 15300  | HB3 ARG E 170  | -12.222 | -0.043 | 40.730 | 1.00  | 59.40 | H0   |    |
| ANISOU15300 | HB3 ARG E 170  | 7190    | 9420   | 5950   | -640  | -1090 | 170  | H0 |
| ATOM 15301  | HG2 ARG E 170  | -12.763 | 1.961  | 41.895 | 1.00  | 61.65 | H0   |    |
| ANISOU15301 | HG2 ARG E 170  | 7830    | 9660   | 5940   | -800  | -1110 | -60  | H0 |
| ATOM 15302  | HG3 ARG E 170  | -13.666 | 2.409  | 40.665 | 1.00  | 59.67 | H0   |    |
| ANISOU15302 | HG3 ARG E 170  | 7600    | 9280   | 5800   | -720  | -890  | -120 | H0 |
| ATOM 15303  | HD2 ARG E 170  | -14.152 | 0.071  | 42.219 | 1.00  | 60.90 | H0   |    |
| ANISOU15303 | HD2 ARG E 170  | 7740    | 9620   | 5780   | -590  | -980  | 110  | H0 |
| ATOM 15304  | HD3 ARG E 170  | -14.987 | 1.415  | 42.366 | 1.00  | 60.98 | H0   |    |
| ANISOU15304 | HD3 ARG E 170  | 7950    | 9550   | 5670   | -620  | -870  | -60  | H0 |
| ATOM 15305  | HE ARG E 170   | -15.301 | 0.787  | 39.889 | 1.00  | 58.22 | H0   |    |
| ANISOU15305 | HE ARG E 170   | 7340    | 9090   | 5690   | -470  | -660  | 10   | H0 |
| ATOM 15306  | HH11 ARG E 170 | -16.044 | -0.926 | 42.650 | 1.00  | 60.98 | H0   |    |
| ANISOU15306 | HH11 ARG E 170 | 7880    | 9650   | 5640   | -450  | -770  | 160  | H0 |
| ATOM 15307  | HH12 ARG E 170 | -17.167 | -1.736 | 42.021 | 1.00  | 59.40 | H0   |    |
| ANISOU15307 | HH12 ARG E 170 | 7640    | 9430   | 5500   | -340  | -590  | 200  | H0 |

|                            |         |        |        |      |       |     |    |
|----------------------------|---------|--------|--------|------|-------|-----|----|
| ATOM 15308 HH21 ARG E 170  | -16.959 | -0.415 | 38.977 | 1.00 | 56.14 |     | H0 |
| ANISOU15308 HH21 ARG E 170 | 7020    | 8810   | 5500   | -290 | -420  | 80  | H0 |
| ATOM 15309 HH22 ARG E 170  | -17.720 | -1.434 | 39.823 | 1.00 | 56.42 |     | H0 |
| ANISOU15309 HH22 ARG E 170 | 7100    | 8920   | 5410   | -250 | -390  | 150 | H0 |
| ATOM 15310 N PHE E 171     | -10.130 | -0.243 | 38.282 | 1.00 | 57.38 |     | N0 |
| ANISOU15310 N PHE E 171    | 6460    | 9150   | 6200   | -670 | -1090 | 220 | N0 |
| ATOM 15311 CA PHE E 171    | -9.286  | -1.410 | 37.926 | 1.00 | 58.10 |     | C0 |
| ANISOU15311 CA PHE E 171   | 6310    | 9310   | 6450   | -590 | -1150 | 340 | C0 |
| ATOM 15312 C PHE E 171     | -8.058  | -0.941 | 37.138 | 1.00 | 59.33 |     | C0 |
| ANISOU15312 C PHE E 171    | 6260    | 9500   | 6780   | -690 | -1170 | 310 | C0 |
| ATOM 15313 O PHE E 171     | -8.074  | 0.192  | 36.602 | 1.00 | 58.50 |     | O0 |
| ANISOU15313 O PHE E 171    | 6220    | 9330   | 6680   | -810 | -1100 | 210 | O0 |
| ATOM 15314 CB PHE E 171    | -10.118 | -2.423 | 37.138 | 1.00 | 55.88 |     | C0 |
| ANISOU15314 CB PHE E 171   | 6030    | 8960   | 6250   | -430 | -980  | 410 | C0 |
| ATOM 15315 CG PHE E 171    | -11.396 | -2.824 | 37.831 | 1.00 | 55.21 |     | C0 |
| ANISOU15315 CG PHE E 171   | 6130    | 8840   | 6000   | -360 | -930  | 430 | C0 |
| ATOM 15316 CD1 PHE E 171   | -11.410 | -3.866 | 38.746 | 1.00 | 56.21 |     | C0 |
| ANISOU15316 CD1 PHE E 171  | 6280    | 9030   | 6040   | -300 | -1030 | 540 | C0 |
| ATOM 15317 CD2 PHE E 171   | -12.578 | -2.141 | 37.591 | 1.00 | 54.08 |     | C0 |
| ANISOU15317 CD2 PHE E 171  | 6150    | 8620   | 5770   | -370 | -780  | 340 | C0 |
| ATOM 15318 CE1 PHE E 171   | -12.582 | -4.227 | 39.393 | 1.00 | 55.96 |     | C0 |
| ANISOU15318 CE1 PHE E 171  | 6430    | 8980   | 5850   | -260 | -960  | 560 | C0 |
| ATOM 15319 CE2 PHE E 171   | -13.749 | -2.504 | 38.238 | 1.00 | 53.94 |     | C0 |
| ANISOU15319 CE2 PHE E 171  | 6290    | 8610   | 5600   | -310 | -720  | 350 | C0 |
| ATOM 15320 CZ PHE E 171    | -13.749 | -3.544 | 39.140 | 1.00 | 54.72 |     | C0 |
| ANISOU15320 CZ PHE E 171   | 6410    | 8770   | 5620   | -270 | -800  | 460 | C0 |
| ATOM 15321 H PHE E 171     | -10.646 | 0.024  | 37.581 | 1.00 | 56.36 |     | H0 |
| ANISOU15321 H PHE E 171    | 6370    | 8940   | 6110   | -650 | -960  | 180 | H0 |
| ATOM 15322 HA PHE E 171    | -8.974  | -1.840 | 38.762 | 1.00 | 59.20 |     | H0 |
| ANISOU15322 HA PHE E 171   | 6440    | 9530   | 6520   | -580 | -1280 | 400 | H0 |
| ATOM 15323 HB2 PHE E 171   | -10.337 | -2.036 | 36.265 | 1.00 | 54.95 |     | H0 |
| ANISOU15323 HB2 PHE E 171  | 5900    | 8770   | 6200   | -440 | -870  | 360 | H0 |
| ATOM 15324 HB3 PHE E 171   | -9.573  | -3.223 | 36.985 | 1.00 | 56.33 |     | H0 |
| ANISOU15324 HB3 PHE E 171  | 5950    | 9050   | 6400   | -370 | -1030 | 490 | H0 |
| ATOM 15325 HD1 PHE E 171   | -10.612 | -4.337 | 38.926 | 1.00 | 57.21 |     | H0 |
| ANISOU15325 HD1 PHE E 171  | 6300    | 9210   | 6230   | -280 | -1140 | 610 | H0 |
| ATOM 15326 HD2 PHE E 171   | -12.586 | -1.426 | 36.975 | 1.00 | 53.64 |     | H0 |
| ANISOU15326 HD2 PHE E 171  | 6100    | 8520   | 5760   | -400 | -720  | 270 | H0 |
| ATOM 15327 HE1 PHE E 171   | -12.578 | -4.942 | 40.010 | 1.00 | 56.61 |     | H0 |
| ANISOU15327 HE1 PHE E 171  | 6540    | 9100   | 5870   | -230 | -1030 | 640 | H0 |
| ATOM 15328 HE2 PHE E 171   | -14.548 | -2.034 | 38.061 | 1.00 | 53.16 |     | H0 |
| ANISOU15328 HE2 PHE E 171  | 6280    | 8470   | 5450   | -300 | -620  | 290 | H0 |
| ATOM 15329 HZ PHE E 171    | -14.547 | -3.790 | 39.579 | 1.00 | 54.60 |     | H0 |
| ANISOU15329 HZ PHE E 171   | 6490    | 8760   | 5490   | -250 | -750  | 470 | H0 |
| ATOM 15330 N GLU E 172     | -7.024  | -1.789 | 37.105 | 1.00 | 60.91 |     | N0 |
| ANISOU15330 N GLU E 172    | 6230    | 9800   | 7110   | -630 | -1280 | 400 | N0 |
| ATOM 15331 CA GLU E 172    | -5.782  | -1.604 | 36.305 | 1.00 | 62.28 |     | C0 |
| ANISOU15331 CA GLU E 172   | 6140    | 10040  | 7480   | -700 | -1290 | 390 | C0 |
| ATOM 15332 C GLU E 172     | -5.522  | -2.893 | 35.518 | 1.00 | 62.08 |     | C0 |
| ANISOU15332 C GLU E 172    | 5930    | 10020  | 7640   | -520 | -1220 | 490 | C0 |
| ATOM 15333 O GLU E 172     | -5.866  | -3.973 | 36.027 | 1.00 | 61.84 |     | O0 |
| ANISOU15333 O GLU E 172    | 5940    | 9990   | 7570   | -360 | -1260 | 580 | O0 |
| ATOM 15334 CB GLU E 172    | -4.605  | -1.226 | 37.208 | 1.00 | 65.02 |     | C0 |
| ANISOU15334 CB GLU E 172   | 6360    | 10550  | 7800   | -830 | -1520 | 380 | C0 |

|                            |        |        |        |       |       |     |    |
|----------------------------|--------|--------|--------|-------|-------|-----|----|
| ATOM 15335 CG GLU E 172    | -4.234 | -2.284 | 38.236 | 1.00  | 66.57 |     | C0 |
| ANISOU15335 CG GLU E 172   | 6480   | 10860  | 7950   | -710  | -1720 | 500 | C0 |
| ATOM 15336 CD GLU E 172    | -3.225 | -1.827 | 39.279 | 1.00  | 69.49 |     | C0 |
| ANISOU15336 CD GLU E 172   | 6760   | 11390  | 8250   | -850  | -1970 | 480 | C0 |
| ATOM 15337 OE1 GLU E 172   | -2.607 | -0.767 | 39.077 | 1.00  | 71.03 |     | O0 |
| ANISOU15337 OE1 GLU E 172  | 6890   | 11630  | 8470   | -1050 | -2000 | 380 | O0 |
| ATOM 15338 OE2 GLU E 172   | -3.066 | -2.524 | 40.297 | 1.00  | 70.63 |     | O0 |
| ANISOU15338 OE2 GLU E 172  | 6910   | 11620  | 8300   | -760  | -2160 | 570 | O0 |
| ATOM 15339 H GLU E 172     | -7.026 | -2.563 | 37.585 | 1.00  | 61.27 |     | H0 |
| ANISOU15339 H GLU E 172    | 6260   | 9890   | 7130   | -550  | -1340 | 480 | H0 |
| ATOM 15340 HA GLU E 172    | -5.934 | -0.872 | 35.664 | 1.00  | 61.62 |     | H0 |
| ANISOU15340 HA GLU E 172   | 6100   | 9890   | 7420   | -780  | -1180 | 310 | H0 |
| ATOM 15341 HB2 GLU E 172   | -3.824 | -1.049 | 36.642 | 1.00  | 65.73 |     | H0 |
| ANISOU15341 HB2 GLU E 172  | 6270   | 10690  | 8020   | -890  | -1510 | 360 | H0 |
| ATOM 15342 HB3 GLU E 172   | -4.828 | -0.395 | 37.676 | 1.00  | 65.34 |     | H0 |
| ANISOU15342 HB3 GLU E 172  | 6540   | 10570  | 7720   | -950  | -1550 | 310 | H0 |
| ATOM 15343 HG2 GLU E 172   | -5.046 | -2.575 | 38.701 | 1.00  | 65.79 |     | H0 |
| ANISOU15343 HG2 GLU E 172  | 6560   | 10700  | 7730   | -640  | -1700 | 520 | H0 |
| ATOM 15344 HG3 GLU E 172   | -3.864 | -3.065 | 37.771 | 1.00  | 66.62 |     | H0 |
| ANISOU15344 HG3 GLU E 172  | 6330   | 10890  | 8100   | -590  | -1700 | 560 | H0 |
| ATOM 15345 N ILE E 173     | -4.964 | -2.776 | 34.311 | 1.00  | 62.59 |     | N0 |
| ANISOU15345 N ILE E 173    | 5830   | 10070  | 7880   | -530  | -1090 | 460 | N0 |
| ATOM 15346 CA ILE E 173    | -4.609 | -3.941 | 33.449 | 1.00  | 62.91 |     | C0 |
| ANISOU15346 CA ILE E 173   | 5690   | 10110  | 8100   | -360  | -1000 | 530 | C0 |
| ATOM 15347 C ILE E 173     | -3.156 | -4.334 | 33.739 | 1.00  | 65.70 |     | C0 |
| ANISOU15347 C ILE E 173    | 5740   | 10640  | 8580   | -340  | -1160 | 580 | C0 |
| ATOM 15348 O ILE E 173     | -2.273 | -3.454 | 33.664 | 1.00  | 67.25 |     | O0 |
| ANISOU15348 O ILE E 173    | 5790   | 10930  | 8830   | -510  | -1210 | 510 | O0 |
| ATOM 15349 CB ILE E 173    | -4.842 | -3.626 | 31.959 | 1.00  | 61.75 |     | C0 |
| ANISOU15349 CB ILE E 173   | 5540   | 9860   | 8060   | -390  | -770  | 470 | C0 |
| ATOM 15350 CG1 ILE E 173   | -6.294 | -3.218 | 31.691 | 1.00  | 59.48 |     | C0 |
| ANISOU15350 CG1 ILE E 173  | 5540   | 9420   | 7640   | -390  | -640  | 430 | C0 |
| ATOM 15351 CG2 ILE E 173   | -4.414 | -4.802 | 31.092 | 1.00  | 61.82 |     | C0 |
| ANISOU15351 CG2 ILE E 173  | 5370   | 9870   | 8240   | -220  | -680  | 530 | C0 |
| ATOM 15352 CD1 ILE E 173   | -6.588 | -2.891 | 30.245 | 1.00  | 58.39 |     | C0 |
| ANISOU15352 CD1 ILE E 173  | 5420   | 9180   | 7580   | -410  | -430  | 380 | C0 |
| ATOM 15353 H ILE E 173     | -4.763 | -1.970 | 33.937 | 1.00  | 62.64 |     | H0 |
| ANISOU15353 H ILE E 173    | 5830   | 10070  | 7900   | -660  | -1050 | 390 | H0 |
| ATOM 15354 HA ILE E 173    | -5.184 | -4.688 | 33.692 | 1.00  | 62.23 |     | H0 |
| ANISOU15354 HA ILE E 173   | 5690   | 9980   | 7970   | -240  | -1000 | 590 | H0 |
| ATOM 15355 HB ILE E 173    | -4.268 | -2.856 | 31.724 | 1.00  | 62.51 |     | H0 |
| ANISOU15355 HB ILE E 173   | 5560   | 10000  | 8190   | -520  | -770  | 410 | H0 |
| ATOM 15356 HG12 ILE E 173  | -6.883 | -3.950 | 31.974 | 1.00  | 58.88 |     | H0 |
| ANISOU15356 HG12 ILE E 173 | 5530   | 9320   | 7520   | -280  | -640  | 480 | H0 |
| ATOM 15357 HG13 ILE E 173  | -6.506 | -2.432 | 32.239 | 1.00  | 59.71 |     | H0 |
| ANISOU15357 HG13 ILE E 173 | 5670   | 9450   | 7560   | -490  | -700  | 380 | H0 |
| ATOM 15358 HG21 ILE E 173  | -3.521 | -5.092 | 31.346 | 1.00  | 63.43 |     | H0 |
| ANISOU15358 HG21 ILE E 173 | 5390   | 10180  | 8530   | -190  | -770  | 560 | H0 |
| ATOM 15359 HG22 ILE E 173  | -4.407 | -4.533 | 30.157 | 1.00  | 61.22 |     | H0 |
| ANISOU15359 HG22 ILE E 173 | 5280   | 9750   | 8230   | -250  | -540  | 490 | H0 |
| ATOM 15360 HG23 ILE E 173  | -5.038 | -5.540 | 31.210 | 1.00  | 60.98 |     | H0 |
| ANISOU15360 HG23 ILE E 173 | 5360   | 9710   | 8110   | -100  | -660  | 580 | H0 |
| ATOM 15361 HD11 ILE E 173  | -5.991 | -2.184 | 29.942 | 1.00  | 59.06 |     | H0 |
| ANISOU15361 HD11 ILE E 173 | 5440   | 9290   | 7710   | -530  | -420  | 330 | H0 |

|                            |        |         |        |      |       |      |    |
|----------------------------|--------|---------|--------|------|-------|------|----|
| ATOM 15362 HD12 ILE E 173  | -7.510 | -2.594  | 30.160 | 1.00 | 57.08 |      | H0 |
| ANISOU15362 HD12 ILE E 173 | 5430   | 8930    | 7330   | -410 | -370  | 350  | H0 |
| ATOM 15363 HD13 ILE E 173  | -6.456 | -3.683  | 29.696 | 1.00 | 58.10 |      | H0 |
| ANISOU15363 HD13 ILE E 173 | 5300   | 9140    | 7640   | -310 | -370  | 420  | H0 |
| ATOM 15364 N LEU E 174     | -2.934 | -5.610  | 34.062 | 1.00 | 66.78 |      | N0 |
| ANISOU15364 N LEU E 174    | 5790   | 10810   | 8770   | -140 | -1240 | 690  | N0 |
| ATOM 15365 CA LEU E 174    | -1.593 | -6.201  | 34.311 | 1.00 | 69.94 |      | C0 |
| ANISOU15365 CA LEU E 174   | 5890   | 11370   | 9320   | -60  | -1390 | 750  | C0 |
| ATOM 15366 C LEU E 174     | -1.019 | -6.704  | 32.983 | 1.00 | 70.61 |      | C0 |
| ANISOU15366 C LEU E 174    | 5750   | 11450   | 9630   | 50   | -1220 | 740  | C0 |
| ATOM 15367 O LEU E 174     | 0.133  | -6.348  | 32.665 | 1.00 | 72.37 |      | O0 |
| ANISOU15367 O LEU E 174    | 5690   | 11820   | 9980   | -20  | -1240 | 700  | O0 |
| ATOM 15368 CB LEU E 174    | -1.728 | -7.341  | 35.325 | 1.00 | 70.74 |      | C0 |
| ANISOU15368 CB LEU E 174   | 6050   | 11480   | 9350   | 130  | -1560 | 880  | C0 |
| ATOM 15369 CG LEU E 174    | -2.313 | -6.961  | 36.685 | 1.00 | 70.74 |      | C0 |
| ANISOU15369 CG LEU E 174   | 6280   | 11490   | 9110   | 40   | -1730 | 890  | C0 |
| ATOM 15370 CD1 LEU E 174   | -2.428 | -8.186  | 37.578 | 1.00 | 71.97 |      | C0 |
| ANISOU15370 CD1 LEU E 174  | 6510   | 11640   | 9190   | 240  | -1870 | 1040 | C0 |
| ATOM 15371 CD2 LEU E 174   | -1.482 | -5.887  | 37.371 | 1.00 | 72.72 |      | C0 |
| ANISOU15371 CD2 LEU E 174  | 6430   | 11900   | 9300   | -160 | -1910 | 830  | C0 |
| ATOM 15372 H LEU E 174     | -3.613 | -6.212  | 34.149 | 1.00 | 65.83 |      | H0 |
| ANISOU15372 H LEU E 174    | 5800   | 10610   | 8610   | -40  | -1200 | 730  | H0 |
| ATOM 15373 HA LEU E 174    | -1.000 | -5.502  | 34.671 | 1.00 | 71.24 |      | H0 |
| ANISOU15373 HA LEU E 174   | 5960   | 11640   | 9470   | -190 | -1500 | 700  | H0 |
| ATOM 15374 HB2 LEU E 174   | -2.293 | -8.034  | 34.930 | 1.00 | 69.53 |      | H0 |
| ANISOU15374 HB2 LEU E 174  | 5990   | 11210   | 9210   | 250  | -1450 | 920  | H0 |
| ATOM 15375 HB3 LEU E 174   | -0.843 | -7.730  | 35.467 | 1.00 | 72.58 |      | H0 |
| ANISOU15375 HB3 LEU E 174  | 6080   | 11820   | 9680   | 210  | -1670 | 920  | H0 |
| ATOM 15376 HG LEU E 174    | -3.222 | -6.601  | 36.540 | 1.00 | 69.04 |      | H0 |
| ANISOU15376 HG LEU E 174   | 6260   | 11170   | 8800   | -10  | -1610 | 850  | H0 |
| ATOM 15377 HD11 LEU E 174  | -3.066 | -8.810  | 37.191 | 1.00 | 70.59 |      | H0 |
| ANISOU15377 HD11 LEU E 174 | 6440   | 11350   | 9030   | 340  | -1750 | 1070 | H0 |
| ATOM 15378 HD12 LEU E 174  | -2.734 | -7.917  | 38.461 | 1.00 | 72.22 |      | H0 |
| ANISOU15378 HD12 LEU E 174 | 6690   | 11690   | 9060   | 170  | -1980 | 1050 | H0 |
| ATOM 15379 HD13 LEU E 174  | -1.559 | -8.616  | 37.653 | 1.00 | 73.67 |      | H0 |
| ANISOU15379 HD13 LEU E 174 | 6530   | 11950   | 9510   | 320  | -1980 | 1090 | H0 |
| ATOM 15380 HD21 LEU E 174  | -0.554 | -6.175  | 37.420 | 1.00 | 74.55 |      | H0 |
| ANISOU15380 HD21 LEU E 174 | 6430   | 12250   | 9640   | -110 | -2020 | 860  | H0 |
| ATOM 15381 HD22 LEU E 174  | -1.822 | -5.738  | 38.270 | 1.00 | 73.03 |      | H0 |
| ANISOU15381 HD22 LEU E 174 | 6620   | 11950   | 9180   | -200 | -2020 | 840  | H0 |
| ATOM 15382 HD23 LEU E 174  | -1.537 | -5.058  | 36.865 | 1.00 | 72.02 |      | H0 |
| ANISOU15382 HD23 LEU E 174 | 6340   | 11790   | 9230   | -300 | -1810 | 740  | H0 |
| ATOM 15383 N ASP E 175     | -1.809 | -7.486  | 32.238 | 1.00 | 69.55 |      | N0 |
| ANISOU15383 N ASP E 175    | 5750   | 11160   | 9520   | 190  | -1040 | 760  | N0 |
| ATOM 15384 CA ASP E 175    | -1.390 | -8.147  | 30.973 | 1.00 | 70.15 |      | C0 |
| ANISOU15384 CA ASP E 175   | 5660   | 11200   | 9790   | 320  | -860  | 760  | C0 |
| ATOM 15385 C ASP E 175     | -2.605 | -8.335  | 30.054 | 1.00 | 67.54 |      | C0 |
| ANISOU15385 C ASP E 175    | 5570   | 10670   | 9420   | 340  | -630  | 730  | C0 |
| ATOM 15386 O ASP E 175     | -3.723 | -8.529  | 30.574 | 1.00 | 65.89 |      | O0 |
| ANISOU15386 O ASP E 175    | 5620   | 10360   | 9060   | 360  | -650  | 760  | O0 |
| ATOM 15387 CB ASP E 175    | -0.702 | -9.483  | 31.271 | 1.00 | 72.45 |      | C0 |
| ANISOU15387 CB ASP E 175   | 5790   | 11540   | 10200  | 570  | -960  | 860  | C0 |
| ATOM 15388 CG ASP E 175    | 0.146  | -10.019 | 30.129 | 1.00 | 73.97 |      | C0 |
| ANISOU15388 CG ASP E 175   | 5730   | 11760   | 10610  | 690  | -810  | 840  | C0 |

|                            |                       |               |    |
|----------------------------|-----------------------|---------------|----|
| ATOM 15389 OD1 ASP E 175   | -0.359 -10.062 28.989 | 1.00 72.78    | OO |
| ANISOU15389 OD1 ASP E 175  | 5670 11490 10490      | 690 -580 780  | OO |
| ATOM 15390 OD2 ASP E 175   | 1.309 -10.386 30.390  | 1.00 77.15    | OO |
| ANISOU15390 OD2 ASP E 175  | 5850 12320 11150      | 800 -930 870  | OO |
| ATOM 15391 H ASP E 175     | -2.670 -7.670 32.474  | 1.00 68.20    | H0 |
| ANISOU15391 H ASP E 175    | 5780 10890 9250       | 210 -1020 780 | H0 |
| ATOM 15392 HA ASP E 175    | -0.741 -7.559 30.519  | 1.00 70.88    | H0 |
| ANISOU15392 HA ASP E 175   | 5600 11370 9960       | 210 -820 700  | H0 |
| ATOM 15393 HB2 ASP E 175   | -0.126 -9.374 32.056  | 1.00 74.10    | H0 |
| ANISOU15393 HB2 ASP E 175  | 5890 11870 10390      | 560 -1140 890 | H0 |
| ATOM 15394 HB3 ASP E 175   | -1.384 -10.151 31.485 | 1.00 71.60    | H0 |
| ANISOU15394 HB3 ASP E 175  | 5850 11320 10030      | 670 -950 920  | H0 |
| ATOM 15395 N VAL E 176     | -2.374 -8.281 28.737  | 1.00 67.52    | N0 |
| ANISOU15395 N VAL E 176    | 5480 10640 9540       | 330 -430 670  | N0 |
| ATOM 15396 CA VAL E 176    | -3.347 -8.644 27.662  | 1.00 65.73    | C0 |
| ANISOU15396 CA VAL E 176   | 5440 10240 9300       | 380 -210 650  | C0 |
| ATOM 15397 C VAL E 176     | -2.590 -9.456 26.604  | 1.00 67.40    | C0 |
| ANISOU15397 C VAL E 176    | 5460 10450 9690       | 520 -70 640   | C0 |
| ATOM 15398 O VAL E 176     | -1.676 -8.891 25.978  | 1.00 68.66    | O0 |
| ANISOU15398 O VAL E 176    | 5420 10710 9960       | 430 0 580     | O0 |
| ATOM 15399 CB VAL E 176    | -4.013 -7.397 27.044  | 1.00 63.71    | C0 |
| ANISOU15399 CB VAL E 176   | 5340 9920 8950        | 180 -90 550   | C0 |
| ATOM 15400 CG1 VAL E 176   | -4.872 -7.744 25.838  | 1.00 61.89    | C0 |
| ANISOU15400 CG1 VAL E 176  | 5260 9540 8720        | 230 110 530   | C0 |
| ATOM 15401 CG2 VAL E 176   | -4.827 -6.619 28.067  | 1.00 62.52    | C0 |
| ANISOU15401 CG2 VAL E 176  | 5390 9750 8620        | 70 -220 550   | C0 |
| ATOM 15402 H VAL E 176     | -1.570 -8.014 28.404  | 1.00 68.73    | H0 |
| ANISOU15402 H VAL E 176    | 5450 10880 9780       | 290 -410 640  | H0 |
| ATOM 15403 HA VAL E 176    | -4.039 -9.205 28.050  | 1.00 64.94    | H0 |
| ANISOU15403 HA VAL E 176   | 5490 10060 9130       | 460 -250 700  | H0 |
| ATOM 15404 HB VAL E 176    | -3.287 -6.805 26.730  | 1.00 64.70    | H0 |
| ANISOU15404 HB VAL E 176   | 5330 10120 9140       | 80 -70 510    | H0 |
| ATOM 15405 HG11 VAL E 176  | -4.303 -7.881 25.061  | 1.00 62.51    | H0 |
| ANISOU15405 HG11 VAL E 176 | 5220 9630 8900        | 240 220 500   | H0 |
| ATOM 15406 HG12 VAL E 176  | -5.492 -7.016 25.658  | 1.00 60.75    | H0 |
| ANISOU15406 HG12 VAL E 176 | 5250 9340 8490        | 120 150 490   | H0 |
| ATOM 15407 HG13 VAL E 176  | -5.373 -8.558 26.019  | 1.00 61.40    | H0 |
| ANISOU15407 HG13 VAL E 176 | 5280 9410 8640        | 340 110 580   | H0 |
| ATOM 15408 HG21 VAL E 176  | -5.561 -7.172 28.386  | 1.00 61.77    | H0 |
| ANISOU15408 HG21 VAL E 176 | 5420 9590 8450        | 150 -230 590  | H0 |
| ATOM 15409 HG22 VAL E 176  | -5.183 -5.813 27.655  | 1.00 61.77    | H0 |
| ANISOU15409 HG22 VAL E 176 | 5380 9620 8470        | -50 -140 490  | H0 |
| ATOM 15410 HG23 VAL E 176  | -4.258 -6.375 28.816  | 1.00 63.90    | H0 |
| ANISOU15410 HG23 VAL E 176 | 5470 10020 8780       | 30 -350 560   | H0 |
| ATOM 15411 N THR E 177     | -2.941 -10.732 26.430 | 1.00 68.42    | N0 |
| ANISOU15411 N THR E 177    | 5670 10470 9860       | 720 -30 700   | N0 |
| ATOM 15412 CA THR E 177    | -2.370 -11.636 25.393 | 1.00 70.63    | C0 |
| ANISOU15412 CA THR E 177   | 5820 10720 10300      | 880 130 690   | C0 |
| ATOM 15413 C THR E 177     | -3.498 -12.083 24.460 | 1.00 69.96    | C0 |
| ANISOU15413 C THR E 177    | 5990 10440 10160      | 900 310 660   | C0 |
| ATOM 15414 O THR E 177     | -4.606 -12.336 24.963 | 1.00 68.90    | O0 |
| ANISOU15414 O THR E 177    | 6090 10200 9890       | 900 260 700   | O0 |
| ATOM 15415 CB THR E 177    | -1.638 -12.829 26.021 | 1.00 72.60    | C0 |
| ANISOU15415 CB THR E 177   | 5930 11000 10660      | 1130 0 780    | C0 |



|             |                |        |         |        |      |       |     |    |
|-------------|----------------|--------|---------|--------|------|-------|-----|----|
| ATOM 15416  | OG1 THR E 177  | -2.468 | -13.393 | 27.036 | 1.00 | 71.82 |     | OO |
| ANISOU15416 | OG1 THR E 177  | 6060   | 10800   | 10430  | 1190 | -140  | 870 | OO |
| ATOM 15417  | CG2 THR E 177  | -0.303 | -12.450 | 26.620 | 1.00 | 75.23 |     | CO |
| ANISOU15417 | CG2 THR E 177  | 5940   | 11550   | 11090  | 1130 | -150  | 790 | CO |
| ATOM 15418  | H THR E 177    | -3.568 | -11.148 | 26.945 | 1.00 | 67.78 |     | H0 |
| ANISOU15418 | H THR E 177    | 5730   | 10320   | 9700   | 770  | -90   | 750 | H0 |
| ATOM 15419  | HA THR E 177   | -1.720 | -11.118 | 24.866 | 1.00 | 71.33 |     | H0 |
| ANISOU15419 | HA THR E 177   | 5750   | 10890   | 10460  | 810  | 200   | 630 | H0 |
| ATOM 15420  | HB THR E 177   | -1.490 | -13.506 | 25.318 | 1.00 | 73.03 |     | H0 |
| ANISOU15420 | HB THR E 177   | 5970   | 10990   | 10800  | 1250 | 120   | 770 | H0 |
| ATOM 15421  | HG21 THR E 177 | 0.224  | -11.963 | 25.960 | 1.00 | 75.69 |     | H0 |
| ANISOU15421 | HG21 THR E 177 | 5850   | 11680   | 11220  | 1050 | -50   | 720 | H0 |
| ATOM 15422  | HG22 THR E 177 | 0.176  | -13.256 | 26.885 | 1.00 | 76.76 |     | H0 |
| ANISOU15422 | HG22 THR E 177 | 6040   | 11760   | 11360  | 1310 | -220  | 840 | H0 |
| ATOM 15423  | HG23 THR E 177 | -0.445 | -11.887 | 27.400 | 1.00 | 75.01 |     | H0 |
| ANISOU15423 | HG23 THR E 177 | 5950   | 11580   | 10970  | 1020 | -290  | 800 | H0 |
| ATOM 15424  | N GLN E 178    | -3.222 | -12.145 | 23.155 | 1.00 | 72.12 |     | N0 |
| ANISOU15424 | N GLN E 178    | 6210   | 10680   | 10520  | 910  | 520   | 590 | N0 |
| ATOM 15425  | CA GLN E 178   | -4.191 | -12.551 | 22.101 | 1.00 | 72.12 |     | CO |
| ANISOU15425 | CA GLN E 178   | 6430   | 10510   | 10460  | 920  | 700   | 550 | CO |
| ATOM 15426  | C GLN E 178    | -3.625 | -13.767 | 21.362 | 1.00 | 73.62 |     | CO |
| ANISOU15426 | C GLN E 178    | 6540   | 10640   | 10790  | 1120 | 820   | 550 | CO |
| ATOM 15427  | O GLN E 178    | -2.534 | -13.640 | 20.772 | 1.00 | 76.95 |     | OO |
| ANISOU15427 | O GLN E 178    | 6740   | 11160   | 11340  | 1150 | 920   | 500 | OO |
| ATOM 15428  | CB GLN E 178   | -4.461 | -11.400 | 21.128 | 1.00 | 72.12 |     | CO |
| ANISOU15428 | CB GLN E 178   | 6480   | 10510   | 10410  | 720  | 840   | 460 | CO |
| ATOM 15429  | CG GLN E 178   | -4.660 | -10.053 | 21.810 | 1.00 | 73.01 |     | CO |
| ANISOU15429 | CG GLN E 178   | 6620   | 10710   | 10420  | 530  | 730   | 450 | CO |
| ATOM 15430  | CD GLN E 178   | -5.546 | -9.116  | 21.024 | 1.00 | 72.88 |     | CO |
| ANISOU15430 | CD GLN E 178   | 6800   | 10610   | 10280  | 370  | 830   | 390 | CO |
| ATOM 15431  | OE1 GLN E 178  | -5.800 | -9.313  | 19.836 | 1.00 | 73.78 |     | OO |
| ANISOU15431 | OE1 GLN E 178  | 6990   | 10650   | 10400  | 370  | 1010  | 350 | OO |
| ATOM 15432  | NE2 GLN E 178  | -6.036 | -8.084  | 21.693 | 1.00 | 72.06 |     | N0 |
| ANISOU15432 | NE2 GLN E 178  | 6790   | 10530   | 10070  | 230  | 730   | 390 | N0 |
| ATOM 15433  | H GLN E 178    | -2.400 | -11.936 | 22.824 | 1.00 | 73.22 |     | H0 |
| ANISOU15433 | H GLN E 178    | 6160   | 10910   | 10750  | 900  | 560   | 560 | H0 |
| ATOM 15434  | HA GLN E 178   | -5.037 | -12.807 | 22.533 | 1.00 | 70.87 |     | H0 |
| ANISOU15434 | HA GLN E 178   | 6440   | 10270   | 10210  | 920  | 640   | 590 | H0 |
| ATOM 15435  | HB2 GLN E 178  | -3.707 | -11.334 | 20.505 | 1.00 | 73.31 |     | H0 |
| ANISOU15435 | HB2 GLN E 178  | 6490   | 10720   | 10640  | 720  | 940   | 420 | H0 |
| ATOM 15436  | HB3 GLN E 178  | -5.262 | -11.619 | 20.607 | 1.00 | 70.99 |     | H0 |
| ANISOU15436 | HB3 GLN E 178  | 6510   | 10260   | 10200  | 720  | 920   | 450 | H0 |
| ATOM 15437  | HG2 GLN E 178  | -5.057 | -10.197 | 22.696 | 1.00 | 72.63 |     | H0 |
| ANISOU15437 | HG2 GLN E 178  | 6640   | 10650   | 10310  | 550  | 600   | 500 | H0 |
| ATOM 15438  | HG3 GLN E 178  | -3.785 | -9.628  | 21.941 | 1.00 | 74.29 |     | H0 |
| ANISOU15438 | HG3 GLN E 178  | 6600   | 10980   | 10640  | 480  | 700   | 440 | H0 |
| ATOM 15439  | HE21 GLN E 178 | -5.913 | -7.262  | 21.391 | 1.00 | 71.99 |     | H0 |
| ANISOU15439 | HE21 GLN E 178 | 6790   | 10530   | 10030  | 120  | 760   | 350 | H0 |
| ATOM 15440  | HE22 GLN E 178 | -6.487 | -8.215  | 22.442 | 1.00 | 71.58 |     | H0 |
| ANISOU15440 | HE22 GLN E 178 | 6790   | 10460   | 9950   | 260  | 630   | 420 | H0 |
| ATOM 15441  | N LYS E 179    | -4.335 | -14.897 | 21.409 | 1.00 | 72.66 |     | N0 |
| ANISOU15441 | N LYS E 179    | 6610   | 10360   | 10640  | 1250 | 830   | 590 | N0 |
| ATOM 15442  | CA LYS E 179   | -3.969 | -16.147 | 20.689 | 1.00 | 73.71 |     | CO |
| ANISOU15442 | CA LYS E 179   | 6750   | 10380   | 10880  | 1460 | 960   | 580 | CO |

|                          |                                  |    |
|--------------------------|----------------------------------|----|
| ATOM 15443 C LYSE 179    | -5.136 -16.567 19.787 1.00 70.98 | C0 |
| ANISOU15443 C LYSE 179   | 6680 9850 10440 1410 1110 540    | C0 |
| ATOM 15444 O LYSE 179    | -6.303 -16.382 20.195 1.00 68.32 | O0 |
| ANISOU15444 O LYSE 179   | 6550 9450 9960 1300 1040 570     | O0 |
| ATOM 15445 CB LYSE 179   | -3.584 -17.253 21.678 1.00 76.23 | C0 |
| ANISOU15445 CB LYSE 179  | 7040 10660 11260 1680 810 680    | C0 |
| ATOM 15446 CG LYSE 179   | -4.691 -17.723 22.614 1.00 75.72 | C0 |
| ANISOU15446 CG LYSE 179  | 7230 10480 11060 1660 670 780    | C0 |
| ATOM 15447 CD LYSE 179   | -4.208 -18.675 23.691 1.00 78.41 | C0 |
| ANISOU15447 CD LYSE 179  | 7540 10800 11450 1870 500 890    | C0 |
| ATOM 15448 CE LYSE 179   | -3.805 -20.037 23.161 1.00 80.79 | C0 |
| ANISOU15448 CE LYSE 179  | 7880 10940 11870 2110 590 900    | C0 |
| ATOM 15449 NZ LYSE 179   | -4.974 -20.810 22.676 1.00 79.96 | N0 |
| ANISOU15449 NZ LYSE 179  | 8100 10610 11670 2080 700 900    | N0 |
| ATOM 15450 H LYSE 179    | -5.106 -14.968 21.888 1.00 71.63 | H0 |
| ANISOU15450 H LYSE 179   | 6640 10170 10410 1220 760 630    | H0 |
| ATOM 15451 HA LYSE 179   | -3.189 -15.956 20.118 1.00 74.80 | H0 |
| ANISOU15451 HA LYSE 179  | 6720 10590 11110 1470 1050 530   | H0 |
| ATOM 15452 HB2 LYSE 179  | -3.266 -18.025 21.165 1.00 77.32 | H0 |
| ANISOU15452 HB2 LYSE 179 | 7170 10730 11480 1820 900 670    | H0 |
| ATOM 15453 HB3 LYSE 179  | -2.836 -16.931 22.223 1.00 77.35 | H0 |
| ANISOU15453 HB3 LYSE 179 | 6990 10940 11470 1700 700 710    | H0 |
| ATOM 15454 HG2 LYSE 179  | -5.097 -16.940 23.042 1.00 74.52 | H0 |
| ANISOU15454 HG2 LYSE 179 | 7100 10390 10820 1520 600 780    | H0 |
| ATOM 15455 HG3 LYSE 179  | -5.386 -18.169 22.085 1.00 74.87 | H0 |
| ANISOU15455 HG3 LYSE 179 | 7300 10240 10910 1650 770 750    | H0 |
| ATOM 15456 HD2 LYSE 179  | -3.437 -18.274 24.147 1.00 79.44 | H0 |
| ANISOU15456 HD2 LYSE 179 | 7480 11070 11640 1890 400 910    | H0 |
| ATOM 15457 HD3 LYSE 179  | -4.920 -18.793 24.355 1.00 77.55 | H0 |
| ANISOU15457 HD3 LYSE 179 | 7590 10640 11230 1820 410 950    | H0 |
| ATOM 15458 HE2 LYSE 179  | -3.170 -19.929 22.428 1.00 81.52 | H0 |
| ANISOU15458 HE2 LYSE 179 | 7830 11080 12060 2160 700 830    | H0 |
| ATOM 15459 HE3 LYSE 179  | -3.363 -20.544 23.869 1.00 82.30 | H0 |
| ANISOU15459 HE3 LYSE 179 | 8030 11140 12100 2250 460 980    | H0 |
| ATOM 15460 HZ1 LYSE 179  | -5.655 -20.747 23.272 1.00 78.86 | H0 |
| ANISOU15460 HZ1 LYSE 179 | 8090 10450 11430 2000 620 950    | H0 |
| ATOM 15461 HZ2 LYSE 179  | -4.747 -21.682 22.578 1.00 81.14 | H0 |
| ANISOU15461 HZ2 LYSE 179 | 8300 10650 11880 2240 720 920    | H0 |
| ATOM 15462 HZ3 LYSE 179  | -5.248 -20.484 21.876 1.00 78.82 | H0 |
| ANISOU15462 HZ3 LYSE 179 | 7980 10460 11510 1990 830 820    | H0 |
| ATOM 15463 N LYSE 180    | -4.813 -17.101 18.605 1.00 70.61 | N0 |
| ANISOU15463 N LYSE 180   | 6630 9730 10460 1490 1300 460    | N0 |
| ATOM 15464 CA LYSE 180   | -5.778 -17.609 17.595 1.00 68.25 | C0 |
| ANISOU15464 CA LYSE 180  | 6590 9260 10080 1450 1450 410    | C0 |
| ATOM 15465 C LYSE 180    | -6.053 -19.091 17.867 1.00 68.33 | C0 |
| ANISOU15465 C LYSE 180   | 6760 9090 10110 1630 1430 460    | C0 |
| ATOM 15466 O LYSE 180    | -5.104 -19.806 18.229 1.00 69.84 | O0 |
| ANISOU15466 O LYSE 180   | 6820 9280 10440 1840 1400 500    | O0 |
| ATOM 15467 CB LYSE 180   | -5.215 -17.422 16.183 1.00 68.84 | C0 |
| ANISOU15467 CB LYSE 180  | 6600 9350 10200 1440 1680 300    | C0 |
| ATOM 15468 CG LYSE 180   | -6.012 -18.095 15.076 1.00 68.35 | C0 |
| ANISOU15468 CG LYSE 180  | 6800 9110 10060 1430 1830 230    | C0 |
| ATOM 15469 CD LYSE 180   | -5.306 -18.093 13.750 1.00 69.76 | C0 |
| ANISOU15469 CD LYSE 180  | 6910 9300 10300 1450 2060 130    | C0 |

|                           |        |         |        |      |       |      |    |
|---------------------------|--------|---------|--------|------|-------|------|----|
| ATOM 15470 CE LYS E 180   | -6.236 | -18.392 | 12.597 | 1.00 | 69.00 |      | C0 |
| ANISOU15470 CE LYS E 180  | 7090   | 9060    | 10070  | 1370 | 2200  | 50   | C0 |
| ATOM 15471 NZ LYS E 180   | -5.484 | -18.676 | 11.351 | 1.00 | 71.64 |      | N0 |
| ANISOU15471 NZ LYS E 180  | 7380   | 9380    | 10460  | 1430 | 2440  | -50  | N0 |
| ATOM 15472 H LYS E 180    | -3.945 | -17.192 | 18.343 | 1.00 | 72.06 |      | H0 |
| ANISOU15472 H LYS E 180   | 6650   | 9980    | 10750  | 1570 | 1350  | 440  | H0 |
| ATOM 15473 HA LYS E 180   | -6.620 | -17.103 | 17.678 | 1.00 | 66.61 |      | H0 |
| ANISOU15473 HA LYS E 180  | 6510   | 9050    | 9760   | 1320 | 1410  | 410  | H0 |
| ATOM 15474 HB2 LYS E 180  | -5.168 | -16.461 | 15.993 | 1.00 | 68.21 |      | H0 |
| ANISOU15474 HB2 LYS E 180 | 6470   | 9370    | 10090  | 1300 | 1690  | 270  | H0 |
| ATOM 15475 HB3 LYS E 180  | -4.301 | -17.774 | 16.165 | 1.00 | 70.65 |      | H0 |
| ANISOU15475 HB3 LYS E 180 | 6670   | 9620    | 10550  | 1570 | 1710  | 290  | H0 |
| ATOM 15476 HG2 LYS E 180  | -6.197 | -19.022 | 15.333 | 1.00 | 68.89 |      | H0 |
| ANISOU15476 HG2 LYS E 180 | 6960   | 9070    | 10150  | 1540 | 1810  | 260  | H0 |
| ATOM 15477 HG3 LYS E 180  | -6.872 | -17.632 | 14.980 | 1.00 | 66.73 |      | H0 |
| ANISOU15477 HG3 LYS E 180 | 6720   | 8890    | 9740   | 1290 | 1810  | 230  | H0 |
| ATOM 15478 HD2 LYS E 180  | -4.893 | -17.215 | 13.608 | 1.00 | 69.70 |      | H0 |
| ANISOU15478 HD2 LYS E 180 | 6770   | 9420    | 10300  | 1360 | 2090  | 110  | H0 |
| ATOM 15479 HD3 LYS E 180  | -4.591 | -18.765 | 13.766 | 1.00 | 71.49 |      | H0 |
| ANISOU15479 HD3 LYS E 180 | 7030   | 9510    | 10620  | 1610 | 2110  | 120  | H0 |
| ATOM 15480 HE2 LYS E 180  | -6.793 | -19.162 | 12.816 | 1.00 | 68.98 |      | H0 |
| ANISOU15480 HE2 LYS E 180 | 7230   | 8930    | 10040  | 1420 | 2160  | 80   | H0 |
| ATOM 15481 HE3 LYS E 180  | -6.821 | -17.627 | 12.446 | 1.00 | 67.69 |      | H0 |
| ANISOU15481 HE3 LYS E 180 | 6990   | 8930    | 9810   | 1210 | 2180  | 50   | H0 |
| ATOM 15482 HZ1 LYS E 180  | -4.940 | -17.977 | 11.154 | 1.00 | 71.66 |      | H0 |
| ANISOU15482 HZ1 LYS E 180 | 7250   | 9490    | 10490  | 1370 | 2490  | -70  | H0 |
| ATOM 15483 HZ2 LYS E 180  | -6.063 | -18.805 | 10.665 | 1.00 | 70.81 |      | H0 |
| ANISOU15483 HZ2 LYS E 180 | 7450   | 9190    | 10260  | 1370 | 2520  | -100 | H0 |
| ATOM 15484 HZ3 LYS E 180  | -4.981 | -19.423 | 11.460 | 1.00 | 72.80 |      | H0 |
| ANISOU15484 HZ3 LYS E 180 | 7480   | 9480    | 10700  | 1590 | 2470  | -50  | H0 |
| ATOM 15485 N ASN E 181    | -7.303 | -19.526 | 17.689 | 1.00 | 66.09 |      | N0 |
| ANISOU15485 N ASN E 181   | 6750   | 8660    | 9700   | 1550 | 1440  | 460  | N0 |
| ATOM 15486 CA ASN E 181   | -7.707 | -20.954 | 17.761 | 1.00 | 66.70 |      | C0 |
| ANISOU15486 CA ASN E 181  | 7030   | 8530    | 9780   | 1680 | 1450  | 500  | C0 |
| ATOM 15487 C ASN E 181    | -8.362 | -21.352 | 16.437 | 1.00 | 65.37 |      | C0 |
| ANISOU15487 C ASN E 181   | 7070   | 8220    | 9550   | 1620 | 1630  | 400  | C0 |
| ATOM 15488 O ASN E 181    | -9.010 | -20.492 | 15.808 | 1.00 | 63.49 |      | O0 |
| ANISOU15488 O ASN E 181   | 6870   | 8040    | 9210   | 1430 | 1690  | 340  | O0 |
| ATOM 15489 CB ASN E 181   | -8.652 | -21.240 | 18.930 | 1.00 | 66.01 |      | C0 |
| ANISOU15489 CB ASN E 181  | 7100   | 8390    | 9590   | 1630 | 1280  | 600  | C0 |
| ATOM 15490 CG ASN E 181   | -8.018 | -20.985 | 20.281 | 1.00 | 67.32 |      | C0 |
| ANISOU15490 CG ASN E 181  | 7110   | 8680    | 9800   | 1700 | 1090  | 710  | C0 |
| ATOM 15491 OD1 ASN E 181  | -6.981 | -21.562 | 20.603 | 1.00 | 69.52 |      | O0 |
| ANISOU15491 OD1 ASN E 181 | 7260   | 8950    | 10200  | 1900 | 1050  | 750  | O0 |
| ATOM 15492 ND2 ASN E 181  | -8.637 | -20.131 | 21.082 | 1.00 | 66.23 |      | N0 |
| ANISOU15492 ND2 ASN E 181 | 6970   | 8640    | 9550   | 1540 | 970   | 750  | N0 |
| ATOM 15493 H ASN E 181    | -7.995 | -18.961 | 17.510 | 1.00 | 64.74 |      | H0 |
| ANISOU15493 H ASN E 181   | 6660   | 8510    | 9440   | 1410 | 1450  | 440  | H0 |
| ATOM 15494 HA ASN E 181   | -6.897 | -21.502 | 17.889 | 1.00 | 68.36 |      | H0 |
| ANISOU15494 HA ASN E 181  | 7150   | 8720    | 10100  | 1850 | 1450  | 520  | H0 |
| ATOM 15495 HB2 ASN E 181  | -9.448 | -20.679 | 18.837 | 1.00 | 64.48 |      | H0 |
| ANISOU15495 HB2 ASN E 181 | 6980   | 8230    | 9290   | 1470 | 1280  | 590  | H0 |
| ATOM 15496 HB3 ASN E 181  | -8.937 | -22.176 | 18.884 | 1.00 | 66.76 |      | H0 |
| ANISOU15496 HB3 ASN E 181 | 7350   | 8340    | 9680   | 1690 | 1300  | 620  | H0 |

|                            |                        |               |    |
|----------------------------|------------------------|---------------|----|
| ATOM 15497 HD21 ASN E 181  | -8.433 -20.105 21.943  | 1.00 66.51    | H0 |
| ANISOU15497 HD21 ASN E 181 | 6970 8730 9580         | 1570 850 820  | H0 |
| ATOM 15498 HD22 ASN E 181  | -9.251 -19.583 20.759  | 1.00 64.69    | H0 |
| ANISOU15498 HD22 ASN E 181 | 6830 8470 9280         | 1410 1010 710 | H0 |
| ATOM 15499 N SER E 182     | -8.164 -22.607 16.038  | 1.00 66.33    | N0 |
| ANISOU15499 N SER E 182    | 7310 8160 9730         | 1770 1720 380 | N0 |
| ATOM 15500 CA SER E 182    | -8.891 -23.296 14.943  | 1.00 66.17    | C0 |
| ANISOU15500 CA SER E 182   | 7550 7970 9630         | 1720 1870 300 | C0 |
| ATOM 15501 C SER E 182     | -9.537 -24.554 15.532  | 1.00 66.61    | C0 |
| ANISOU15501 C SER E 182    | 7840 7810 9650         | 1770 1800 360 | C0 |
| ATOM 15502 O SER E 182     | -8.796 -25.489 15.889  | 1.00 68.63    | O0 |
| ANISOU15502 O SER E 182    | 8100 7960 10020        | 2000 1790 410 | O0 |
| ATOM 15503 CB SER E 182    | -7.969 -23.607 13.791  | 1.00 67.90    | C0 |
| ANISOU15503 CB SER E 182   | 7710 8150 9940         | 1850 2070 190 | C0 |
| ATOM 15504 OG SER E 182    | -8.711 -23.956 12.633  | 1.00 67.58    | O0 |
| ANISOU15504 OG SER E 182   | 7900 7980 9800         | 1740 2210 90  | O0 |
| ATOM 15505 H SER E 182     | -7.542 -23.150 16.423  | 1.00 67.96    | H0 |
| ANISOU15505 H SER E 182    | 7460 8340 10020        | 1930 1690 420 | H0 |
| ATOM 15506 HA SER E 182    | -9.612 -22.693 14.618  | 1.00 64.56    | H0 |
| ANISOU15506 HA SER E 182   | 7400 7810 9330         | 1550 1880 270 | H0 |
| ATOM 15507 HB2 SER E 182   | -7.411 -22.820 13.599  | 1.00 67.77    | H0 |
| ANISOU15507 HB2 SER E 182  | 7510 8280 9960         | 1830 2100 160 | H0 |
| ATOM 15508 HB3 SER E 182   | -7.376 -24.349 14.038  | 1.00 69.62    | H0 |
| ANISOU15508 HB3 SER E 182  | 7900 8290 10260        | 2030 2070 210 | H0 |
| ATOM 15509 N VAL E 183     | -10.864 -24.538 15.678 | 1.00 65.21    | N0 |
| ANISOU15509 N VAL E 183    | 7860 7590 9330         | 1580 1750 380 | N0 |
| ATOM 15510 CA VAL E 183    | -11.658 -25.576 16.399 | 1.00 65.96    | C0 |
| ANISOU15510 CA VAL E 183   | 8190 7510 9360         | 1560 1660 460 | C0 |
| ATOM 15511 C VAL E 183     | -12.674 -26.174 15.424 | 1.00 66.37    | C0 |
| ANISOU15511 C VAL E 183    | 8500 7410 9310         | 1410 1770 380 | C0 |
| ATOM 15512 O VAL E 183     | -13.282 -25.411 14.650 | 1.00 64.72    | O0 |
| ANISOU15512 O VAL E 183    | 8280 7300 9010         | 1240 1820 300 | O0 |
| ATOM 15513 CB VAL E 183    | -12.366 -24.993 17.639 | 1.00 64.24    | C0 |
| ANISOU15513 CB VAL E 183   | 7940 7410 9060         | 1430 1490 570 | C0 |
| ATOM 15514 CG1 VAL E 183   | -12.977 -26.087 18.503 | 1.00 64.86    | C0 |
| ANISOU15514 CG1 VAL E 183  | 8240 7320 9080         | 1420 1410 670 | C0 |
| ATOM 15515 CG2 VAL E 183   | -11.439 -24.111 18.465 | 1.00 63.99    | C0 |
| ANISOU15515 CG2 VAL E 183  | 7630 7580 9100         | 1510 1380 630 | C0 |
| ATOM 15516 H VAL E 183     | -11.382 -23.871 15.335 | 1.00 63.85    | H0 |
| ANISOU15516 H VAL E 183    | 7680 7500 9080         | 1430 1760 350 | H0 |
| ATOM 15517 HA VAL E 183    | -11.053 -26.282 16.690 | 1.00 67.61    | H0 |
| ANISOU15517 HA VAL E 183   | 8410 7620 9650         | 1720 1650 500 | H0 |
| ATOM 15518 HB VAL E 183    | -13.105 -24.423 17.313 | 1.00 62.74    | H0 |
| ANISOU15518 HB VAL E 183   | 7770 7290 8780         | 1270 1500 530 | H0 |
| ATOM 15519 HG11 VAL E 183  | -13.710 -26.510 18.023 | 1.00 64.82    | H0 |
| ANISOU15519 HG11 VAL E 183 | 8400 7220 9010         | 1320 1470 630 | H0 |
| ATOM 15520 HG12 VAL E 183  | -13.314 -25.699 19.329 | 1.00 64.18    | H0 |
| ANISOU15520 HG12 VAL E 183 | 8120 7330 8940         | 1350 1300 740 | H0 |
| ATOM 15521 HG13 VAL E 183  | -12.299 -26.753 18.711 | 1.00 66.58    | H0 |
| ANISOU15521 HG13 VAL E 183 | 8480 7440 9380         | 1590 1400 710 | H0 |
| ATOM 15522 HG21 VAL E 183  | -10.605 -24.584 18.633 | 1.00 65.58    | H0 |
| ANISOU15522 HG21 VAL E 183 | 7780 7730 9400         | 1690 1370 660 | H0 |
| ATOM 15523 HG22 VAL E 183  | -11.865 -23.896 19.313 | 1.00 63.38    | H0 |
| ANISOU15523 HG22 VAL E 183 | 7570 7550 8960         | 1450 1270 700 | H0 |

|                            |         |         |        |      |       |     |    |
|----------------------------|---------|---------|--------|------|-------|-----|----|
| ATOM 15524 HG23 VAL E 183  | -11.254 | -23.289 | 17.980 | 1.00 | 63.19 | H0  |    |
| ANISOU15524 HG23 VAL E 183 | 7410    | 7590    | 9010   | 1460 | 1420  | 570 | H0 |
| ATOM 15525 N THR E 184     | -12.843 | -27.494 | 15.473 | 1.00 | 69.17 | N0  |    |
| ANISOU15525 N THR E 184    | 9090    | 7520    | 9670   | 1480 | 1800  | 400 | N0 |
| ATOM 15526 CA THR E 184    | -13.954 | -28.223 | 14.811 | 1.00 | 70.33 | C0  |    |
| ANISOU15526 CA THR E 184   | 9530    | 7500    | 9690   | 1310 | 1860  | 330 | C0 |
| ATOM 15527 C THR E 184     | -14.994 | -28.565 | 15.886 | 1.00 | 70.40 | C0  |    |
| ANISOU15527 C THR E 184    | 9670    | 7470    | 9610   | 1160 | 1730  | 440 | C0 |
| ATOM 15528 O THR E 184     | -14.590 | -28.935 | 17.009 | 1.00 | 70.93 | O0  |    |
| ANISOU15528 O THR E 184    | 9730    | 7500    | 9720   | 1280 | 1630  | 570 | O0 |
| ATOM 15529 CB THR E 184    | -13.428 | -29.430 | 14.025 | 1.00 | 73.18 | C0  |    |
| ANISOU15529 CB THR E 184   | 10080   | 7610    | 10120  | 1460 | 2000  | 260 | C0 |
| ATOM 15530 OG1 THR E 184   | -14.509 | -29.888 | 13.212 | 1.00 | 73.57 | O0  |    |
| ANISOU15530 OG1 THR E 184  | 10380   | 7540    | 10030  | 1250 | 2070  | 170 | O0 |
| ATOM 15531 CG2 THR E 184   | -12.908 | -30.550 | 14.900 | 1.00 | 75.74 | C0  |    |
| ANISOU15531 CG2 THR E 184  | 10520   | 7730    | 10520  | 1660 | 1940  | 360 | C0 |
| ATOM 15532 H THR E 184     | -12.285 | -28.049 | 15.929 | 1.00 | 70.52 | H0  |    |
| ANISOU15532 H THR E 184    | 9270    | 7610    | 9910   | 1630 | 1770  | 450 | H0 |
| ATOM 15533 HA THR E 184    | -14.374 | -27.605 | 14.169 | 1.00 | 69.09 | H0  |    |
| ANISOU15533 HA THR E 184   | 9340    | 7440    | 9470   | 1180 | 1900  | 260 | H0 |
| ATOM 15534 HB THR E 184    | -12.697 | -29.121 | 13.438 | 1.00 | 73.58 | H0  |    |
| ANISOU15534 HB THR E 184   | 10010   | 7710    | 10230  | 1560 | 2090  | 200 | H0 |
| ATOM 15535 HG21 THR E 184  | -12.301 | -30.189 | 15.570 | 1.00 | 75.60 | H0  |    |
| ANISOU15535 HG21 THR E 184 | 10330   | 7810    | 10580  | 1780 | 1870  | 430 | H0 |
| ATOM 15536 HG22 THR E 184  | -12.433 | -31.198 | 14.350 | 1.00 | 77.27 | H0  |    |
| ANISOU15536 HG22 THR E 184 | 10810   | 7770    | 10770  | 1790 | 2040  | 310 | H0 |
| ATOM 15537 HG23 THR E 184  | -13.655 | -30.991 | 15.345 | 1.00 | 75.62 | H0  |    |
| ANISOU15537 HG23 THR E 184 | 10670   | 7620    | 10430  | 1550 | 1890  | 420 | H0 |
| ATOM 15538 N TYR E 185     | -16.279 | -28.412 | 15.558 | 1.00 | 69.70 | N0  |    |
| ANISOU15538 N TYR E 185    | 9690    | 7420    | 9380   | 900  | 1730  | 400 | N0 |
| ATOM 15539 CA TYR E 185    | -17.424 | -28.580 | 16.490 | 1.00 | 69.72 | C0  |    |
| ANISOU15539 CA TYR E 185   | 9780    | 7430    | 9270   | 710  | 1630  | 490 | C0 |
| ATOM 15540 C TYR E 185     | -18.349 | -29.679 | 15.955 | 1.00 | 71.65 | C0  |    |
| ANISOU15540 C TYR E 185    | 10330   | 7470    | 9430   | 550  | 1690  | 440 | C0 |
| ATOM 15541 O TYR E 185     | -18.225 | -30.036 | 14.771 | 1.00 | 72.88 | O0  |    |
| ANISOU15541 O TYR E 185    | 10590   | 7520    | 9590   | 550  | 1800  | 320 | O0 |
| ATOM 15542 CB TYR E 185    | -18.145 | -27.243 | 16.675 | 1.00 | 66.75 | C0  |    |
| ANISOU15542 CB TYR E 185   | 9220    | 7330    | 8820   | 550  | 1560  | 480 | C0 |
| ATOM 15543 CG TYR E 185    | -17.309 | -26.154 | 17.300 | 1.00 | 65.47 | C0  |    |
| ANISOU15543 CG TYR E 185   | 8790    | 7360    | 8720   | 680  | 1490  | 530 | C0 |
| ATOM 15544 CD1 TYR E 185   | -17.137 | -26.077 | 18.675 | 1.00 | 65.59 | C0  |    |
| ANISOU15544 CD1 TYR E 185  | 8750    | 7430    | 8750   | 730  | 1370  | 660 | C0 |
| ATOM 15545 CD2 TYR E 185   | -16.701 | -25.182 | 16.519 | 1.00 | 64.75 | C0  |    |
| ANISOU15545 CD2 TYR E 185  | 8520    | 7400    | 8680   | 730  | 1540  | 450 | C0 |
| ATOM 15546 CE1 TYR E 185   | -16.383 | -25.068 | 19.256 | 1.00 | 64.58 | C0  |    |
| ANISOU15546 CE1 TYR E 185  | 8390    | 7480    | 8670   | 830  | 1290  | 690 | C0 |
| ATOM 15547 CE2 TYR E 185   | -15.945 | -24.166 | 17.084 | 1.00 | 63.73 | C0  |    |
| ANISOU15547 CE2 TYR E 185  | 8160    | 7440    | 8610   | 820  | 1480  | 490 | C0 |
| ATOM 15548 CZ TYR E 185    | -15.785 | -24.107 | 18.458 | 1.00 | 63.96 | C0  |    |
| ANISOU15548 CZ TYR E 185   | 8130    | 7520    | 8650   | 870  | 1350  | 610 | C0 |
| ATOM 15549 OH TYR E 185    | -15.039 | -23.108 | 19.014 | 1.00 | 63.25 | O0  |    |
| ANISOU15549 OH TYR E 185   | 7820    | 7600    | 8610   | 940  | 1280  | 640 | O0 |
| ATOM 15550 H TYR E 185     | -16.551 | -28.189 | 14.717 | 1.00 | 69.26 | H0  |    |
| ANISOU15550 H TYR E 185    | 9650    | 7380    | 9280   | 820  | 1800  | 310 | H0 |

|                           |         |         |        |      |       |     |    |
|---------------------------|---------|---------|--------|------|-------|-----|----|
| ATOM 15551 HA TYR E 185   | -17.075 | -28.872 | 17.370 | 1.00 | 70.30 | H0  |    |
| ANISOU15551 HA TYR E 185  | 9860    | 7470    | 9380   | 800  | 1560  | 580 | H0 |
| ATOM 15552 HB2 TYR E 185  | -18.456 | -26.937 | 15.798 | 1.00 | 66.26 | H0  |    |
| ANISOU15552 HB2 TYR E 185 | 9150    | 7310    | 8720   | 470  | 1620  | 390 | H0 |
| ATOM 15553 HB3 TYR E 185  | -18.935 | -27.394 | 17.235 | 1.00 | 66.63 | H0  |    |
| ANISOU15553 HB3 TYR E 185 | 9260    | 7330    | 8730   | 420  | 1510  | 530 | H0 |
| ATOM 15554 HD1 TYR E 185  | -17.544 | -26.724 | 19.227 | 1.00 | 66.23 | H0  |    |
| ANISOU15554 HD1 TYR E 185 | 8960    | 7420    | 8790   | 690  | 1340  | 720 | H0 |
| ATOM 15555 HD2 TYR E 185  | -16.808 | -25.209 | 15.583 | 1.00 | 64.66 | H0  |    |
| ANISOU15555 HD2 TYR E 185 | 8560    | 7350    | 8650   | 700  | 1620  | 370 | H0 |
| ATOM 15556 HE1 TYR E 185  | -16.278 | -25.035 | 20.193 | 1.00 | 64.86 | H0  |    |
| ANISOU15556 HE1 TYR E 185 | 8390    | 7550    | 8700   | 850  | 1210  | 770 | H0 |
| ATOM 15557 HE2 TYR E 185  | -15.540 | -23.516 | 16.534 | 1.00 | 63.34 | H0  |    |
| ANISOU15557 HE2 TYR E 185 | 8000    | 7470    | 8590   | 840  | 1520  | 440 | H0 |
| ATOM 15558 N SER E 186    | -19.234 | -30.201 | 16.812 | 1.00 | 72.97 | N0  |    |
| ANISOU15558 N SER E 186   | 10630   | 7590    | 9510   | 390  | 1620  | 520 | N0 |
| ATOM 15559 CA SER E 186   | -20.142 | -31.345 | 16.523 | 1.00 | 75.02 | C0  |    |
| ANISOU15559 CA SER E 186  | 11190   | 7640    | 9680   | 210  | 1660  | 500 | C0 |
| ATOM 15560 C SER E 186    | -21.043 | -31.025 | 15.322 | 1.00 | 74.72 | C0  |    |
| ANISOU15560 C SER E 186   | 11160   | 7680    | 9550   | -10  | 1720  | 360 | C0 |
| ATOM 15561 O SER E 186    | -21.217 | -31.921 | 14.465 | 1.00 | 76.14 | O0  |    |
| ANISOU15561 O SER E 186   | 11570   | 7660    | 9700   | -70  | 1810  | 270 | O0 |
| ATOM 15562 CB SER E 186   | -20.957 | -31.711 | 17.739 | 1.00 | 75.37 | C0  |    |
| ANISOU15562 CB SER E 186  | 11320   | 7680    | 9640   | 50   | 1580  | 620 | C0 |
| ATOM 15563 OG SER E 186   | -21.711 | -30.598 | 18.198 | 1.00 | 73.27 | O0  |    |
| ANISOU15563 OG SER E 186  | 10830   | 7700    | 9300   | -100 | 1510  | 640 | O0 |
| ATOM 15564 H SER E 186    | -19.346 | -29.881 | 17.658 | 1.00 | 72.32 | H0  |    |
| ANISOU15564 H SER E 186   | 10470   | 7600    | 9410   | 380  | 1540  | 610 | H0 |
| ATOM 15565 HA SER E 186   | -19.576 | -32.127 | 16.282 | 1.00 | 76.60 | H0  |    |
| ANISOU15565 HA SER E 186  | 11530   | 7640    | 9940   | 330  | 1710  | 490 | H0 |
| ATOM 15566 HB2 SER E 186  | -21.566 | -32.450 | 17.514 | 1.00 | 76.44 | H0  |    |
| ANISOU15566 HB2 SER E 186 | 11650   | 7680    | 9720   | -100 | 1610  | 600 | H0 |
| ATOM 15567 HB3 SER E 186  | -20.355 | -32.017 | 18.455 | 1.00 | 76.17 | H0  |    |
| ANISOU15567 HB3 SER E 186 | 11450   | 7700    | 9790   | 190  | 1540  | 710 | H0 |
| ATOM 15568 N CYS E 187    | -21.581 | -29.798 | 15.264 | 1.00 | 72.85 | N0  |    |
| ANISOU15568 N CYS E 187   | 10690   | 7720    | 9260   | -110 | 1670  | 330 | N0 |
| ATOM 15569 CA CYS E 187   | -22.502 | -29.308 | 14.198 | 1.00 | 72.53 | C0  |    |
| ANISOU15569 CA CYS E 187  | 10630   | 7810    | 9120   | -310 | 1690  | 210 | C0 |
| ATOM 15570 C CYS E 187    | -21.912 | -29.583 | 12.812 | 1.00 | 72.88 | C0  |    |
| ANISOU15570 C CYS E 187   | 10780   | 7720    | 9190   | -230 | 1810  | 90  | C0 |
| ATOM 15571 O CYS E 187    | -22.641 | -30.110 | 11.950 | 1.00 | 73.87 | O0  |    |
| ANISOU15571 O CYS E 187   | 11070   | 7770    | 9220   | -400 | 1850  | -10 | O0 |
| ATOM 15572 CB CYS E 187   | -22.778 | -27.810 | 14.317 | 1.00 | 70.85 | C0  |    |
| ANISOU15572 CB CYS E 187  | 10130   | 7900    | 8890   | -320 | 1630  | 210 | C0 |
| ATOM 15573 SG CYS E 187   | -21.351 | -26.742 | 13.964 | 1.00 | 70.30 | S0  |    |
| ANISOU15573 SG CYS E 187  | 9860    | 7920    | 8940   | -60  | 1660  | 200 | S0 |
| ATOM 15574 H CYS E 187    | -21.421 | -29.162 | 15.895 | 1.00 | 71.93 | H0  |    |
| ANISOU15574 H CYS E 187   | 10420   | 7740    | 9170   | -60  | 1610  | 390 | H0 |
| ATOM 15575 HA CYS E 187   | -23.355 | -29.793 | 14.282 | 1.00 | 73.05 | H0  |    |
| ANISOU15575 HA CYS E 187  | 10800   | 7840    | 9120   | -480 | 1680  | 210 | H0 |
| ATOM 15576 HB2 CYS E 187  | -23.499 | -27.572 | 13.698 | 1.00 | 70.50 | H0  |    |
| ANISOU15576 HB2 CYS E 187 | 10090   | 7930    | 8770   | -460 | 1630  | 150 | H0 |
| ATOM 15577 HB3 CYS E 187  | -23.090 | -27.616 | 15.225 | 1.00 | 70.41 | H0  |    |
| ANISOU15577 HB3 CYS E 187 | 10010   | 7920    | 8820   | -360 | 1560  | 290 | H0 |

|                           |         |         |        |      |       |      |    |
|---------------------------|---------|---------|--------|------|-------|------|----|
| ATOM 15578 N CYS E 188    | -20.633 | -29.247 | 12.629 | 1.00 | 72.46 | N0   |    |
| ANISOU15578 N CYS E 188   | 10620   | 7660    | 9250   | 20   | 1860  | 80   | N0 |
| ATOM 15579 CA CYS E 188   | -20.046 | -28.838 | 11.328 | 1.00 | 72.43 | C0   |    |
| ANISOU15579 CA CYS E 188  | 10590   | 7670    | 9260   | 90   | 1960  | -40  | C0 |
| ATOM 15580 C CYS E 188    | -18.720 | -29.552 | 11.076 | 1.00 | 72.89 | C0   |    |
| ANISOU15580 C CYS E 188   | 10720   | 7530    | 9440   | 350  | 2080  | -60  | C0 |
| ATOM 15581 O CYS E 188    | -17.848 | -29.567 | 11.940 | 1.00 | 72.99 | O0   |    |
| ANISOU15581 O CYS E 188   | 10620   | 7540    | 9570   | 540  | 2050  | 30   | O0 |
| ATOM 15582 CB CYS E 188   | -19.869 | -27.325 | 11.328 | 1.00 | 70.95 | C0   |    |
| ANISOU15582 CB CYS E 188  | 10120   | 7760    | 9080   | 120  | 1920  | -30  | C0 |
| ATOM 15583 SG CYS E 188   | -21.343 | -26.452 | 11.924 | 1.00 | 71.95 | S0   |    |
| ANISOU15583 SG CYS E 188  | 10130   | 8120    | 9090   | -110 | 1770  | 20   | S0 |
| ATOM 15584 H CYS E 188    | -20.018 | -29.241 | 13.301 | 1.00 | 72.62 | H0   |    |
| ANISOU15584 H CYS E 188   | 10570   | 7670    | 9350   | 160  | 1840  | 150  | H0 |
| ATOM 15585 HA CYS E 188   | -20.682 | -29.078 | 10.617 | 1.00 | 72.62 | H0   |    |
| ANISOU15585 HA CYS E 188  | 10730   | 7660    | 9200   | -50  | 1990  | -120 | H0 |
| ATOM 15586 HB2 CYS E 188  | -19.110 | -27.089 | 11.901 | 1.00 | 71.28 | H0   |    |
| ANISOU15586 HB2 CYS E 188 | 10050   | 7830    | 9210   | 270  | 1900  | 30   | H0 |
| ATOM 15587 HB3 CYS E 188  | -19.671 | -27.022 | 10.422 | 1.00 | 71.39 | H0   |    |
| ANISOU15587 HB3 CYS E 188 | 10180   | 7830    | 9110   | 130  | 1980  | -110 | H0 |
| ATOM 15588 N PRO E 189    | -18.521 | -30.154 | 9.879  | 1.00 | 73.15 | N0   |    |
| ANISOU15588 N PRO E 189   | 10940   | 7410    | 9450   | 360  | 2210  | -190 | N0 |
| ATOM 15589 CA PRO E 189   | -17.249 | -30.793 | 9.540  | 1.00 | 74.30 | C0   |    |
| ANISOU15589 CA PRO E 189  | 11140   | 7380    | 9710   | 620  | 2340  | -230 | C0 |
| ATOM 15590 C PRO E 189    | -16.110 | -29.793 | 9.276  | 1.00 | 72.99 | C0   |    |
| ANISOU15590 C PRO E 189   | 10700   | 7390    | 9640   | 800  | 2400  | -240 | C0 |
| ATOM 15591 O PRO E 189    | -14.962 | -30.203 | 9.315  | 1.00 | 74.89 | O0   |    |
| ANISOU15591 O PRO E 189   | 10910   | 7540    | 10010  | 1050 | 2480  | -250 | O0 |
| ATOM 15592 CB PRO E 189   | -17.569 | -31.587 | 8.264  | 1.00 | 75.67 | C0   |    |
| ANISOU15592 CB PRO E 189  | 11600   | 7360    | 9790   | 520  | 2460  | -380 | C0 |
| ATOM 15593 CG PRO E 189   | -18.729 | -30.845 | 7.633  | 1.00 | 74.32 | C0   |    |
| ANISOU15593 CG PRO E 189  | 11410   | 7370    | 9460   | 240  | 2410  | -440 | C0 |
| ATOM 15594 CD PRO E 189   | -19.507 | -30.251 | 8.790  | 1.00 | 72.76 | C0   |    |
| ANISOU15594 CD PRO E 189  | 11050   | 7350    | 9240   | 120  | 2240  | -310 | C0 |
| ATOM 15595 HA PRO E 189   | -16.992 | -31.419 | 10.263 | 1.00 | 75.23 | H0   |    |
| ANISOU15595 HA PRO E 189  | 11320   | 7380    | 9890   | 710  | 2310  | -160 | H0 |
| ATOM 15596 HB2 PRO E 189  | -16.797 | -31.606 | 7.658  | 1.00 | 76.60 | H0   |    |
| ANISOU15596 HB2 PRO E 189 | 11710   | 7440    | 9950   | 660  | 2570  | -450 | H0 |
| ATOM 15597 HB3 PRO E 189  | -17.821 | -32.507 | 8.480  | 1.00 | 77.13 | H0   |    |
| ANISOU15597 HB3 PRO E 189 | 11980   | 7360    | 9960   | 500  | 2460  | -370 | H0 |
| ATOM 15598 HG2 PRO E 189  | -18.405 | -30.139 | 7.037  | 1.00 | 73.66 | H0   |    |
| ANISOU15598 HG2 PRO E 189 | 11220   | 7410    | 9360   | 270  | 2450  | -480 | H0 |
| ATOM 15599 HG3 PRO E 189  | -19.292 | -31.458 | 7.118  | 1.00 | 75.32 | H0   |    |
| ANISOU15599 HG3 PRO E 189 | 11740   | 7380    | 9500   | 110  | 2430  | -500 | H0 |
| ATOM 15600 HD2 PRO E 189  | -19.857 | -29.371 | 8.557  | 1.00 | 71.40 | H0   |    |
| ANISOU15600 HD2 PRO E 189 | 10740   | 7360    | 9020   | 40   | 2200  | -320 | H0 |
| ATOM 15601 HD3 PRO E 189  | -20.251 | -30.828 | 9.044  | 1.00 | 73.33 | H0   |    |
| ANISOU15601 HD3 PRO E 189 | 11260   | 7350    | 9260   | -20  | 2190  | -290 | H0 |
| ATOM 15602 N GLU E 190    | -16.447 | -28.524 | 9.016  | 1.00 | 69.49 | N0   |    |
| ANISOU15602 N GLU E 190   | 10070   | 7190    | 9140   | 680  | 2350  | -250 | N0 |
| ATOM 15603 CA GLU E 190   | -15.472 | -27.446 | 8.697  | 1.00 | 67.44 | C0   |    |
| ANISOU15603 CA GLU E 190  | 9570    | 7110    | 8950   | 800  | 2410  | -270 | C0 |
| ATOM 15604 C GLU E 190    | -15.040 | -26.785 | 10.010 | 1.00 | 64.62 | C0   |    |
| ANISOU15604 C GLU E 190   | 8960    | 6900    | 8690   | 890  | 2280  | -140 | C0 |

|                           |                                   |    |
|---------------------------|-----------------------------------|----|
| ATOM 15605 O GLU E 190    | -15.887 -26.678 10.923 1.00 63.27 | O0 |
| ANISOU15605 O GLU E 190   | 8790 6780 8470 770 2140 -50       | O0 |
| ATOM 15606 CB GLU E 190   | -16.064 -26.416 7.727 1.00 66.68  | C0 |
| ANISOU15606 CB GLU E 190  | 9440 7180 8720 620 2430 -350      | C0 |
| ATOM 15607 CG GLU E 190   | -17.023 -26.993 6.693 1.00 67.78  | C0 |
| ANISOU15607 CG GLU E 190  | 9850 7200 8700 440 2470 -450      | C0 |
| ATOM 15608 CD GLU E 190   | -18.496 -26.968 7.082 1.00 67.24  | C0 |
| ANISOU15608 CD GLU E 190  | 9850 7190 8510 210 2320 -410      | C0 |
| ATOM 15609 OE1 GLU E 190  | -19.349 -27.195 6.196 1.00 67.34  | O0 |
| ANISOU15609 OE1 GLU E 190 | 10030 7170 8390 30 2330 -500      | O0 |
| ATOM 15610 OE2 GLU E 190  | -18.793 -26.729 8.274 1.00 66.78  | O0 |
| ANISOU15610 OE2 GLU E 190 | 9660 7210 8500 200 2190 -300      | O0 |
| ATOM 15611 H GLU E 190    | -17.306 -28.234 9.045 1.00 68.51  | H0 |
| ANISOU15611 H GLU E 190   | 9970 7140 8920 520 2280 -250      | H0 |
| ATOM 15612 HA GLU E 190   | -14.685 -27.855 8.277 1.00 68.88  | H0 |
| ANISOU15612 HA GLU E 190  | 9770 7210 9190 940 2520 -320      | H0 |
| ATOM 15613 HB2 GLU E 190  | -16.532 -25.731 8.248 1.00 65.14  | H0 |
| ANISOU15613 HB2 GLU E 190 | 9140 7120 8500 540 2320 -290      | H0 |
| ATOM 15614 HB3 GLU E 190  | -15.325 -25.976 7.257 1.00 66.82  | H0 |
| ANISOU15614 HB3 GLU E 190 | 9360 7250 8770 700 2510 -390      | H0 |
| ATOM 15615 HG2 GLU E 190  | -16.920 -26.492 5.856 1.00 67.66  | H0 |
| ANISOU15615 HG2 GLU E 190 | 9830 7250 8630 400 2530 -520      | H0 |
| ATOM 15616 HG3 GLU E 190  | -16.770 -27.922 6.510 1.00 69.38  | H0 |
| ANISOU15616 HG3 GLU E 190 | 10200 7230 8930 500 2540 -490     | H0 |
| ATOM 15617 N ALA E 191    | -13.773 -26.374 10.102 1.00 63.30 | N0 |
| ANISOU15617 N ALA E 191   | 8580 6810 8650 1080 2340 -130     | N0 |
| ATOM 15618 CA ALA E 191   | -13.193 -25.692 11.282 1.00 61.70 | C0 |
| ANISOU15618 CA ALA E 191  | 8130 6770 8550 1170 2210 -20      | C0 |
| ATOM 15619 C ALA E 191    | -13.630 -24.221 11.302 1.00 58.84 | C0 |
| ANISOU15619 C ALA E 191   | 7600 6640 8110 1010 2140 -10      | C0 |
| ATOM 15620 O ALA E 191    | -13.820 -23.626 10.221 1.00 58.04 | O0 |
| ANISOU15620 O ALA E 191   | 7520 6600 7930 910 2230 -90       | O0 |
| ATOM 15621 CB ALA E 191   | -11.690 -25.817 11.277 1.00 63.14 | C0 |
| ANISOU15621 CB ALA E 191  | 8130 6960 8900 1420 2300 -20      | C0 |
| ATOM 15622 H ALA E 191    | -13.165 -26.484 9.432 1.00 64.49  | H0 |
| ANISOU15622 H ALA E 191   | 8730 6930 8840 1160 2450 -200     | H0 |
| ATOM 15623 HA ALA E 191   | -13.541 -26.129 12.094 1.00 61.75 | H0 |
| ANISOU15623 HA ALA E 191  | 8190 6720 8560 1170 2120 60       | H0 |
| ATOM 15624 HB1 ALA E 191  | -11.325 -25.396 12.074 1.00 62.83 | H0 |
| ANISOU15624 HB1 ALA E 191 | 7930 7020 8920 1470 2210 50       | H0 |
| ATOM 15625 HB2 ALA E 191  | -11.442 -26.757 11.266 1.00 64.78 | H0 |
| ANISOU15625 HB2 ALA E 191 | 8450 7010 9150 1540 2340 -30      | H0 |
| ATOM 15626 HB3 ALA E 191  | -11.330 -25.379 10.487 1.00 63.28 | H0 |
| ANISOU15626 HB3 ALA E 191 | 8090 7040 8910 1410 2400 -100     | H0 |
| ATOM 15627 N TYR E 192    | -13.790 -23.665 12.502 1.00 56.98 | N0 |
| ANISOU15627 N TYR E 192   | 7240 6520 7890 990 1990 100       | N0 |
| ATOM 15628 CA TYR E 192   | -14.126 -22.241 12.750 1.00 54.58 | C0 |
| ANISOU15628 CA TYR E 192  | 6780 6430 7530 870 1910 120       | C0 |
| ATOM 15629 C TYR E 192    | -12.962 -21.609 13.514 1.00 55.06 | C0 |
| ANISOU15629 C TYR E 192   | 6590 6620 7720 1000 1860 180      | C0 |
| ATOM 15630 O TYR E 192    | -12.404 -22.270 14.412 1.00 56.12 | O0 |
| ANISOU15630 O TYR E 192   | 6680 6700 7940 1140 1800 250      | O0 |
| ATOM 15631 CB TYR E 192   | -15.463 -22.130 13.486 1.00 52.82 | C0 |
| ANISOU15631 CB TYR E 192  | 6630 6240 7200 720 1770 180       | C0 |



|             |               |         |         |        |      |           |    |
|-------------|---------------|---------|---------|--------|------|-----------|----|
| ATOM 15632  | CG TYR E 192  | -16.664 | -22.280 | 12.589 | 1.00 | 52.06     | C0 |
| ANISOU15632 | CG TYR E 192  | 6710    | 6110    | 6960   | 550  | 1810 110  | C0 |
| ATOM 15633  | CD1 TYR E 192 | -17.086 | -23.527 | 12.155 | 1.00 | 53.30     | C0 |
| ANISOU15633 | CD1 TYR E 192 | 7080    | 6080    | 7090   | 520  | 1860 70   | C0 |
| ATOM 15634  | CD2 TYR E 192 | -17.372 | -21.171 | 12.158 | 1.00 | 50.71     | C0 |
| ANISOU15634 | CD2 TYR E 192 | 6500    | 6080    | 6690   | 410  | 1780 70   | C0 |
| ATOM 15635  | CE1 TYR E 192 | -18.182 | -23.669 | 11.320 | 1.00 | 53.23     | C0 |
| ANISOU15635 | CE1 TYR E 192 | 7230    | 6050    | 6950   | 340  | 1880 0    | C0 |
| ATOM 15636  | CE2 TYR E 192 | -18.473 | -21.294 | 11.325 | 1.00 | 50.77     | C0 |
| ANISOU15636 | CE2 TYR E 192 | 6650    | 6070    | 6570   | 260  | 1790 10   | C0 |
| ATOM 15637  | CZ TYR E 192  | -18.879 | -22.547 | 10.903 | 1.00 | 51.90     | C0 |
| ANISOU15637 | CZ TYR E 192  | 6990    | 6050    | 6690   | 220  | 1840 -30  | C0 |
| ATOM 15638  | OH TYR E 192  | -19.962 | -22.667 | 10.083 | 1.00 | 52.11     | O0 |
| ANISOU15638 | OH TYR E 192  | 7150    | 6070    | 6580   | 50   | 1830 -100 | O0 |
| ATOM 15639  | H TYR E 192   | -13.701 | -24.135 | 13.277 | 1.00 | 57.53     | H0 |
| ANISOU15639 | H TYR E 192   | 7310    | 6540    | 8000   | 1060 | 1920 170  | H0 |
| ATOM 15640  | HA TYR E 192  | -14.210 | -21.780 | 11.877 | 1.00 | 54.30     | H0 |
| ANISOU15640 | HA TYR E 192  | 6750    | 6430    | 7450   | 810  | 1980 50   | H0 |
| ATOM 15641  | HB2 TYR E 192 | -15.496 | -22.822 | 14.179 | 1.00 | 53.47     | H0 |
| ANISOU15641 | HB2 TYR E 192 | 6760    | 6250    | 7310   | 760  | 1730 240  | H0 |
| ATOM 15642  | HB3 TYR E 192 | -15.504 | -21.258 | 13.931 | 1.00 | 51.82     | H0 |
| ANISOU15642 | HB3 TYR E 192 | 6390    | 6240    | 7060   | 680  | 1710 210  | H0 |
| ATOM 15643  | HD1 TYR E 192 | -16.615 | -24.296 | 12.432 | 1.00 | 54.49     | H0 |
| ANISOU15643 | HD1 TYR E 192 | 7280    | 6110    | 7310   | 620  | 1890 90   | H0 |
| ATOM 15644  | HD2 TYR E 192 | -17.101 | -20.312 | 12.439 | 1.00 | 50.00     | H0 |
| ANISOU15644 | HD2 TYR E 192 | 6280    | 6100    | 6620   | 430  | 1740 100  | H0 |
| ATOM 15645  | HE1 TYR E 192 | -18.456 | -24.526 | 11.037 | 1.00 | 54.21     | H0 |
| ANISOU15645 | HE1 TYR E 192 | 7500    | 6040    | 7050   | 310  | 1920 -30  | H0 |
| ATOM 15646  | HE2 TYR E 192 | -18.942 | -20.526 | 11.044 | 1.00 | 49.80     | H0 |
| ANISOU15646 | HE2 TYR E 192 | 6490    | 6050    | 6390   | 190  | 1750 -10  | H0 |
| ATOM 15647  | N GLU E 193   | -12.598 | -20.380 | 13.142 | 1.00 | 54.62     | N0 |
| ANISOU15647 | N GLU E 193   | 6380    | 6710    | 7660   | 940  | 1880 150  | N0 |
| ATOM 15648  | CA GLU E 193  | -11.454 | -19.638 | 13.730 | 1.00 | 55.41     | C0 |
| ANISOU15648 | CA GLU E 193  | 6230    | 6950    | 7870   | 1030 | 1850 180  | C0 |
| ATOM 15649  | C GLU E 193   | -11.981 | -18.571 | 14.693 | 1.00 | 54.32     | C0 |
| ANISOU15649 | C GLU E 193   | 6020    | 6950    | 7670   | 920  | 1690 250  | C0 |
| ATOM 15650  | O GLU E 193   | -13.036 | -17.962 | 14.402 | 1.00 | 52.99     | O0 |
| ANISOU15650 | O GLU E 193   | 5950    | 6810    | 7370   | 770  | 1670 230  | O0 |
| ATOM 15651  | CB GLU E 193  | -10.599 | -19.025 | 12.624 | 1.00 | 55.99     | C0 |
| ANISOU15651 | CB GLU E 193  | 6200    | 7090    | 7980   | 1030 | 2000 100  | C0 |
| ATOM 15652  | CG GLU E 193  | -9.985  | -20.062 | 11.696 | 1.00 | 57.82     | C0 |
| ANISOU15652 | CG GLU E 193  | 6500    | 7200    | 8270   | 1160 | 2180 20   | C0 |
| ATOM 15653  | CD GLU E 193  | -8.884  | -19.514 | 10.808 | 1.00 | 58.92     | C0 |
| ANISOU15653 | CD GLU E 193  | 6480    | 7420    | 8480   | 1180 | 2340 -50  | C0 |
| ATOM 15654  | OE1 GLU E 193 | -8.303  | -20.293 | 10.014 | 1.00 | 60.55     | O0 |
| ANISOU15654 | OE1 GLU E 193 | 6730    | 7540    | 8740   | 1300 | 2510 -130 | O0 |
| ATOM 15655  | OE2 GLU E 193 | -8.601  | -18.306 | 10.925 | 1.00 | 58.03     | O0 |
| ANISOU15655 | OE2 GLU E 193 | 6220    | 7470    | 8360   | 1080 | 2310 -40  | O0 |
| ATOM 15656  | H GLU E 193   | -13.038 | -19.915 | 12.495 | 1.00 | 53.93     | H0 |
| ANISOU15656 | H GLU E 193   | 6350    | 6650    | 7490   | 850  | 1920 100  | H0 |
| ATOM 15657  | HA GLU E 193  | -10.902 | -20.273 | 14.236 | 1.00 | 56.55     | H0 |
| ANISOU15657 | HA GLU E 193  | 6330    | 7060    | 8100   | 1160 | 1820 220  | H0 |
| ATOM 15658  | HB2 GLU E 193 | -11.155 | -18.414 | 12.097 | 1.00 | 54.97     | H0 |
| ANISOU15658 | HB2 GLU E 193 | 6140    | 6990    | 7750   | 900  | 2020 60   | H0 |

|                            |                        |               |    |
|----------------------------|------------------------|---------------|----|
| ATOM 15659 HB3 GLU E 193   | -9.882 -18.502 13.038  | 1.00 56.25    | H0 |
| ANISOU15659 HB3 GLU E 193  | 6060 7230 8080         | 1060 1970 120 | H0 |
| ATOM 15660 HG2 GLU E 193   | -9.617 -20.795 12.234  | 1.00 58.85    | H0 |
| ANISOU15660 HG2 GLU E 193  | 6610 7270 8490         | 1290 2150 60  | H0 |
| ATOM 15661 HG3 GLU E 193   | -10.689 -20.437 11.124 | 1.00 57.57    | H0 |
| ANISOU15661 HG3 GLU E 193  | 6650 7070 8160         | 1090 2220 -20 | H0 |
| ATOM 15662 N ASP E 194     | -11.268 -18.368 15.802 | 1.00 55.05    | N0 |
| ANISOU15662 N ASP E 194    | 5950 7130 7840         | 990 1580 320  | N0 |
| ATOM 15663 CA ASP E 194    | -11.584 -17.329 16.816 | 1.00 54.56    | C0 |
| ANISOU15663 CA ASP E 194   | 5810 7200 7720         | 900 1430 380  | C0 |
| ATOM 15664 C ASP E 194     | -10.279 -16.769 17.388 | 1.00 54.69    | C0 |
| ANISOU15664 C ASP E 194    | 5580 7340 7850         | 970 1380 400  | C0 |
| ATOM 15665 O ASP E 194     | -9.286 -17.515 17.447  | 1.00 56.27    | O0 |
| ANISOU15665 O ASP E 194    | 5680 7520 8180         | 1130 1410 420 | O0 |
| ATOM 15666 CB ASP E 194    | -12.500 -17.893 17.907 | 1.00 54.93    | C0 |
| ANISOU15666 CB ASP E 194   | 5970 7200 7700         | 890 1300 460  | C0 |
| ATOM 15667 CG ASP E 194    | -11.914 -19.075 18.656 | 1.00 57.26    | C0 |
| ANISOU15667 CG ASP E 194   | 6270 7410 8080         | 1050 1250 530 | C0 |
| ATOM 15668 OD1 ASP E 194   | -11.049 -18.843 19.526 | 1.00 58.75    | O0 |
| ANISOU15668 OD1 ASP E 194  | 6300 7680 8340         | 1130 1150 590 | O0 |
| ATOM 15669 OD2 ASP E 194   | -12.320 -20.218 18.356 | 1.00 58.83    | O0 |
| ANISOU15669 OD2 ASP E 194  | 6630 7450 8270         | 1090 1300 540 | O0 |
| ATOM 15670 H ASP E 194     | -10.533 -18.866 16.008 | 1.00 56.38    | H0 |
| ANISOU15670 H ASP E 194    | 6050 7280 8100         | 1110 1590 340 | H0 |
| ATOM 15671 HA ASP E 194    | -12.064 -16.598 16.364 | 1.00 53.39    | H0 |
| ANISOU15671 HA ASP E 194   | 5690 7090 7500         | 800 1450 340  | H0 |
| ATOM 15672 HB2 ASP E 194   | -12.696 -17.185 18.554 | 1.00 54.16    | H0 |
| ANISOU15672 HB2 ASP E 194  | 5820 7190 7560         | 830 1220 480  | H0 |
| ATOM 15673 HB3 ASP E 194   | -13.345 -18.175 17.499 | 1.00 54.35    | H0 |
| ANISOU15673 HB3 ASP E 194  | 6030 7060 7550         | 820 1340 430  | H0 |
| ATOM 15674 N VAL E 195     | -10.293 -15.492 17.775 | 1.00 53.23    | N0 |
| ANISOU15674 N VAL E 195    | 5310 7290 7620         | 860 1310 400  | N0 |
| ATOM 15675 CA VAL E 195    | -9.228 -14.851 18.600  | 1.00 54.03    | C0 |
| ANISOU15675 CA VAL E 195   | 5200 7530 7800         | 880 1210 440  | C0 |
| ATOM 15676 C VAL E 195     | -9.693 -14.876 20.059  | 1.00 53.25    | C0 |
| ANISOU15676 C VAL E 195    | 5130 7460 7640         | 880 1030 520  | C0 |
| ATOM 15677 O VAL E 195     | -10.804 -14.370 20.338 | 1.00 51.53    | O0 |
| ANISOU15677 O VAL E 195    | 5040 7240 7300         | 770 980 530   | O0 |
| ATOM 15678 CB VAL E 195    | -8.918 -13.416 18.133  | 1.00 53.79    | C0 |
| ANISOU15678 CB VAL E 195   | 5080 7600 7750         | 740 1250 380  | C0 |
| ATOM 15679 CG1 VAL E 195   | -7.857 -12.765 19.010  | 1.00 54.91    | C0 |
| ANISOU15679 CG1 VAL E 195  | 5010 7890 7970         | 730 1140 410  | C0 |
| ATOM 15680 CG2 VAL E 195   | -8.504 -13.377 16.666  | 1.00 54.44    | C0 |
| ANISOU15680 CG2 VAL E 195  | 5160 7660 7870         | 720 1450 300  | C0 |
| ATOM 15681 H VAL E 195     | -10.968 -14.922 17.555 | 1.00 52.23    | H0 |
| ANISOU15681 H VAL E 195    | 5260 7170 7410         | 760 1310 380  | H0 |
| ATOM 15682 HA VAL E 195    | -8.416 -15.382 18.523  | 1.00 55.38    | H0 |
| ANISOU15682 HA VAL E 195   | 5270 7700 8080         | 990 1240 440  | H0 |
| ATOM 15683 HB VAL E 195    | -9.750 -12.889 18.225  | 1.00 52.51    | H0 |
| ANISOU15683 HB VAL E 195   | 5030 7430 7490         | 650 1220 380  | H0 |
| ATOM 15684 HG11 VAL E 195  | -8.256 -12.486 19.853  | 1.00 54.30    | H0 |
| ANISOU15684 HG11 VAL E 195 | 4960 7840 7830         | 700 1020 450  | H0 |
| ATOM 15685 HG12 VAL E 195  | -7.489 -11.987 18.555  | 1.00 54.98    | H0 |
| ANISOU15685 HG12 VAL E 195 | 4950 7950 7980         | 650 1200 360  | H0 |

|                            |                                   |    |
|----------------------------|-----------------------------------|----|
| ATOM 15686 HG13 VAL E 195  | -7.144 -13.404 19.186 1.00 56.20  | H0 |
| ANISOU15686 HG13 VAL E 195 | 5060 8070 8230 850 1140 430       | H0 |
| ATOM 15687 HG21 VAL E 195  | -7.750 -13.976 16.525 1.00 55.73  | H0 |
| ANISOU15687 HG21 VAL E 195 | 5220 7820 8130 830 1500 290       | H0 |
| ATOM 15688 HG22 VAL E 195  | -8.247 -12.471 16.423 1.00 54.29  | H0 |
| ANISOU15688 HG22 VAL E 195 | 5090 7700 7840 630 1470 270       | H0 |
| ATOM 15689 HG23 VAL E 195  | -9.250 -13.661 16.110 1.00 53.68  | H0 |
| ANISOU15689 HG23 VAL E 195 | 5210 7480 7710 700 1500 280       | H0 |
| ATOM 15690 N GLU E 196     | -8.883 -15.463 20.942 1.00 54.44  | N0 |
| ANISOU15690 N GLU E 196    | 5170 7640 7880 1010 920 590       | N0 |
| ATOM 15691 CA GLU E 196    | -9.113 -15.455 22.409 1.00 54.66  | C0 |
| ANISOU15691 CA GLU E 196   | 5210 7710 7840 1010 730 680       | C0 |
| ATOM 15692 C GLU E 196     | -8.261 -14.342 23.024 1.00 53.95  | C0 |
| ANISOU15692 C GLU E 196    | 4930 7790 7780 950 630 680        | C0 |
| ATOM 15693 O GLU E 196     | -7.028 -14.434 22.948 1.00 54.88  | O0 |
| ANISOU15693 O GLU E 196    | 4840 7980 8030 1040 620 680       | O0 |
| ATOM 15694 CB GLU E 196    | -8.788 -16.816 23.021 1.00 57.19  | C0 |
| ANISOU15694 CB GLU E 196   | 5560 7940 8220 1190 670 770       | C0 |
| ATOM 15695 CG GLU E 196    | -9.152 -16.904 24.491 1.00 58.37  | C0 |
| ANISOU15695 CG GLU E 196   | 5780 8120 8280 1180 480 870       | C0 |
| ATOM 15696 CD GLU E 196    | -9.141 -18.309 25.065 1.00 60.68  | C0 |
| ANISOU15696 CD GLU E 196   | 6180 8290 8580 1330 420 980       | C0 |
| ATOM 15697 OE1 GLU E 196   | -10.092 -18.648 25.795 1.00 61.83 | O0 |
| ANISOU15697 OE1 GLU E 196  | 6510 8380 8600 1270 370 1040      | O0 |
| ATOM 15698 OE2 GLU E 196   | -8.182 -19.056 24.787 1.00 63.02  | O0 |
| ANISOU15698 OE2 GLU E 196  | 6390 8540 9020 1510 440 990       | O0 |
| ATOM 15699 H GLU E 196     | -8.130 -15.911 20.694 1.00 55.81  | H0 |
| ANISOU15699 H GLU E 196    | 5250 7800 8150 1110 960 590       | H0 |
| ATOM 15700 HA GLU E 196    | -10.063 -15.254 22.575 1.00 53.33 | H0 |
| ANISOU15700 HA GLU E 196   | 5180 7520 7570 930 720 680        | H0 |
| ATOM 15701 HB2 GLU E 196   | -9.275 -17.508 22.528 1.00 57.03  | H0 |
| ANISOU15701 HB2 GLU E 196  | 5670 7810 8190 1210 750 770       | H0 |
| ATOM 15702 HB3 GLU E 196   | -7.828 -16.988 22.918 1.00 58.57  | H0 |
| ANISOU15702 HB3 GLU E 196  | 5590 8160 8510 1290 670 770       | H0 |
| ATOM 15703 HG2 GLU E 196   | -8.524 -16.355 25.008 1.00 58.87  | H0 |
| ANISOU15703 HG2 GLU E 196  | 5710 8300 8360 1180 390 890       | H0 |
| ATOM 15704 HG3 GLU E 196   | -10.048 -16.524 24.619 1.00 56.99 | H0 |
| ANISOU15704 HG3 GLU E 196  | 5710 7950 7990 1070 490 860       | H0 |
| ATOM 15705 N VAL E 197     | -8.910 -13.317 23.579 1.00 52.29  | N0 |
| ANISOU15705 N VAL E 197    | 4780 7640 7450 810 560 670        | N0 |
| ATOM 15706 CA VAL E 197    | -8.244 -12.195 24.303 1.00 52.42  | C0 |
| ANISOU15706 CA VAL E 197   | 4660 7800 7460 720 440 660        | C0 |
| ATOM 15707 C VAL E 197     | -8.296 -12.500 25.802 1.00 52.30  | C0 |
| ANISOU15707 C VAL E 197    | 4670 7830 7380 760 250 750        | C0 |
| ATOM 15708 O VAL E 197     | -9.414 -12.609 26.340 1.00 50.73  | O0 |
| ANISOU15708 O VAL E 197    | 4650 7580 7040 720 220 780        | O0 |
| ATOM 15709 CB VAL E 197    | -8.904 -10.846 23.968 1.00 51.06  | C0 |
| ANISOU15709 CB VAL E 197   | 4570 7650 7180 540 480 590        | C0 |
| ATOM 15710 CG1 VAL E 197   | -8.205 -9.689 24.667 1.00 52.04   | C0 |
| ANISOU15710 CG1 VAL E 197  | 4580 7900 7290 440 370 570        | C0 |
| ATOM 15711 CG2 VAL E 197   | -8.955 -10.617 22.466 1.00 50.82  | C0 |
| ANISOU15711 CG2 VAL E 197  | 4560 7560 7190 500 670 510        | C0 |
| ATOM 15712 H VAL E 197     | -9.817 -13.237 23.548 1.00 51.17  | H0 |
| ANISOU15712 H VAL E 197    | 4770 7450 7220 750 580 660        | H0 |

|                            |                       |                |    |
|----------------------------|-----------------------|----------------|----|
| ATOM 15713 HA VAL E 197    | -7.312 -12.159 24.026 | 1.00 53.49     | H0 |
| ANISOU15713 HA VAL E 197   | 4640 7990 7690        | 750 460 650    | H0 |
| ATOM 15714 HB VAL E 197    | -9.835 -10.880 24.299 | 1.00 50.16     | H0 |
| ANISOU15714 HB VAL E 197   | 4600 7490 6970        | 520 460 600    | H0 |
| ATOM 15715 HG11 VAL E 197  | -8.406 -9.714 25.619  | 1.00 52.06     | H0 |
| ANISOU15715 HG11 VAL E 197 | 4620 7930 7230        | 440 260 610    | H0 |
| ATOM 15716 HG12 VAL E 197  | -8.516 -8.846 24.294  | 1.00 51.19     | H0 |
| ANISOU15716 HG12 VAL E 197 | 4530 7790 7140        | 330 420 520    | H0 |
| ATOM 15717 HG13 VAL E 197  | -7.243 -9.765 24.538  | 1.00 53.20     | H0 |
| ANISOU15717 HG13 VAL E 197 | 4560 8110 7540        | 460 370 570    | H0 |
| ATOM 15718 HG21 VAL E 197  | -8.105 -10.877 22.069 | 1.00 51.81     | H0 |
| ANISOU15718 HG21 VAL E 197 | 4550 7710 7420        | 550 720 500    | H0 |
| ATOM 15719 HG22 VAL E 197  | -9.121 -9.677 22.284  | 1.00 50.20     | H0 |
| ANISOU15719 HG22 VAL E 197 | 4510 7510 7060        | 400 680 470    | H0 |
| ATOM 15720 HG23 VAL E 197  | -9.669 -11.153 22.079 | 1.00 50.00     | H0 |
| ANISOU15720 HG23 VAL E 197 | 4570 7380 7050        | 540 730 510    | H0 |
| ATOM 15721 N SER E 198     | -7.129 -12.648 26.436 | 1.00 53.84     | N0 |
| ANISOU15721 N SER E 198    | 4680 8120 7660        | 830 130 800    | N0 |
| ATOM 15722 CA SER E 198    | -6.977 -12.901 27.892 | 1.00 54.44     | C0 |
| ANISOU15722 CA SER E 198   | 4760 8260 7670        | 880 -80 890    | C0 |
| ATOM 15723 C SER E 198     | -6.647 -11.587 28.603 | 1.00 54.29     | C0 |
| ANISOU15723 C SER E 198    | 4670 8380 7580        | 720 -200 850   | C0 |
| ATOM 15724 O SER E 198     | -5.517 -11.101 28.444 | 1.00 55.40     | O0 |
| ANISOU15724 O SER E 198    | 4590 8640 7830        | 700 -230 820   | O0 |
| ATOM 15725 CB SER E 198    | -5.941 -13.953 28.149 | 1.00 56.77     | C0 |
| ANISOU15725 CB SER E 198   | 4910 8570 8090        | 1070 -160 970  | C0 |
| ATOM 15726 OG SER E 198    | -6.359 -15.202 27.623 | 1.00 56.80     | O0 |
| ANISOU15726 OG SER E 198   | 5040 8410 8130        | 1210 -60 1000  | O0 |
| ATOM 15727 H SER E 198     | -6.325 -12.601 26.010 | 1.00 54.74     | H0 |
| ANISOU15727 H SER E 198    | 4640 8280 7880        | 870 160 770    | H0 |
| ATOM 15728 HA SER E 198    | -7.848 -13.232 28.239 | 1.00 53.67     | H0 |
| ANISOU15728 HA SER E 198   | 4830 8090 7470        | 870 -90 920    | H0 |
| ATOM 15729 HB2 SER E 198   | -5.091 -13.687 27.730 | 1.00 57.68     | H0 |
| ANISOU15729 HB2 SER E 198  | 4840 8760 8320        | 1090 -140 930  | H0 |
| ATOM 15730 HB3 SER E 198   | -5.792 -14.037 29.118 | 1.00 57.61     | H0 |
| ANISOU15730 HB3 SER E 198  | 5020 8720 8150        | 1090 -310 1030 | H0 |
| ATOM 15731 N LEU E 199     | -7.619 -11.036 29.335 | 1.00 53.40     | N0 |
| ANISOU15731 N LEU E 199    | 4730 8260 7300        | 620 -250 850   | N0 |
| ATOM 15732 CA LEU E 199    | -7.503 -9.762 30.093  | 1.00 53.88     | C0 |
| ANISOU15732 CA LEU E 199   | 4790 8430 7260        | 460 -360 810   | C0 |
| ATOM 15733 C LEU E 199     | -7.182 -10.083 31.557 | 1.00 55.20     | C0 |
| ANISOU15733 C LEU E 199    | 4960 8670 7340        | 500 -580 890   | C0 |
| ATOM 15734 O LEU E 199     | -8.107 -10.490 32.286 | 1.00 54.18     | O0 |
| ANISOU15734 O LEU E 199    | 5020 8490 7070        | 510 -610 950   | O0 |
| ATOM 15735 CB LEU E 199    | -8.819 -8.983 29.964  | 1.00 52.28     | C0 |
| ANISOU15735 CB LEU E 199   | 4800 8160 6910        | 340 -270 740   | C0 |
| ATOM 15736 CG LEU E 199    | -8.895 -7.639 30.693  | 1.00 52.92     | C0 |
| ANISOU15736 CG LEU E 199   | 4930 8310 6870        | 190 -360 680   | C0 |
| ATOM 15737 CD1 LEU E 199   | -7.850 -6.663 30.171  | 1.00 54.01     | C0 |
| ANISOU15737 CD1 LEU E 199  | 4900 8520 7100        | 80 -360 610    | C0 |
| ATOM 15738 CD2 LEU E 199   | -10.287 -7.034 30.564 | 1.00 51.58     | C0 |
| ANISOU15738 CD2 LEU E 199  | 4970 8070 6570        | 130 -260 620   | C0 |
| ATOM 15739 H LEU E 199     | -8.439 -11.425 29.416 | 1.00 52.58     | H0 |
| ANISOU15739 H LEU E 199    | 4780 8080 7120        | 630 -220 870   | H0 |

|                            |         |         |        |      |       |      |    |
|----------------------------|---------|---------|--------|------|-------|------|----|
| ATOM 15740 HA LEU E 199    | -6.767  | -9.232  | 29.711 | 1.00 | 54.44 | H0   |    |
| ANISOU15740 HA LEU E 199   | 4720    | 8560    | 7410   | 410  | -350  | 760  | H0 |
| ATOM 15741 HB2 LEU E 199   | -8.986  | -8.824  | 29.013 | 1.00 | 51.50 | H0   |    |
| ANISOU15741 HB2 LEU E 199  | 4690    | 8010    | 6860   | 330  | -150  | 690  | H0 |
| ATOM 15742 HB3 LEU E 199   | -9.544  | -9.551  | 30.295 | 1.00 | 51.85 | H0   |    |
| ANISOU15742 HB3 LEU E 199  | 4860    | 8050    | 6790   | 390  | -270  | 780  | H0 |
| ATOM 15743 HG LEU E 199    | -8.717  | -7.796  | 31.653 | 1.00 | 53.85 | H0   |    |
| ANISOU15743 HG LEU E 199   | 5050    | 8480    | 6930   | 200  | -490  | 720  | H0 |
| ATOM 15744 HD11 LEU E 199  | -6.962  | -6.971  | 30.425 | 1.00 | 55.31 | H0   |    |
| ANISOU15744 HD11 LEU E 199 | 4920    | 8760    | 7340   | 120  | -440  | 640  | H0 |
| ATOM 15745 HD12 LEU E 199  | -8.008  | -5.782  | 30.553 | 1.00 | 53.87 | H0   |    |
| ANISOU15745 HD12 LEU E 199 | 4950    | 8520    | 7000   | -20  | -390  | 560  | H0 |
| ATOM 15746 HD13 LEU E 199  | -7.910  | -6.611  | 29.202 | 1.00 | 53.26 | H0   |    |
| ANISOU15746 HD13 LEU E 199 | 4790    | 8370    | 7070   | 80   | -230  | 570  | H0 |
| ATOM 15747 HD21 LEU E 199  | -10.534 | -6.986  | 29.624 | 1.00 | 50.58 | H0   |    |
| ANISOU15747 HD21 LEU E 199 | 4840    | 7880    | 6490   | 130  | -140  | 590  | H0 |
| ATOM 15748 HD22 LEU E 199  | -10.290 | -6.140  | 30.945 | 1.00 | 51.59 | H0   |    |
| ANISOU15748 HD22 LEU E 199 | 5000    | 8100    | 6500   | 40   | -310  | 570  | H0 |
| ATOM 15749 HD23 LEU E 199  | -10.928 | -7.591  | 31.038 | 1.00 | 51.17 | H0   |    |
| ANISOU15749 HD23 LEU E 199 | 5010    | 7990    | 6440   | 180  | -270  | 670  | H0 |
| ATOM 15750 N ASN E 200     | -5.913  | -9.920  | 31.949 | 1.00 | 57.45 | N0   |    |
| ANISOU15750 N ASN E 200    | 5030    | 9090    | 7710   | 510  | -720  | 910  | N0 |
| ATOM 15751 CA ASN E 200    | -5.441  | -9.989  | 33.357 | 1.00 | 59.21 | C0   |    |
| ANISOU15751 CA ASN E 200   | 5240    | 9420    | 7840   | 520  | -960  | 980  | C0 |
| ATOM 15752 C ASN E 200     | -5.542  | -8.578  | 33.949 | 1.00 | 59.43 | C0   |    |
| ANISOU15752 C ASN E 200    | 5320    | 9530    | 7740   | 310  | -1030 | 900  | C0 |
| ATOM 15753 O ASN E 200     | -4.787  | -7.697  | 33.506 | 1.00 | 60.33 | O0   |    |
| ANISOU15753 O ASN E 200    | 5270    | 9720    | 7930   | 200  | -1020 | 820  | O0 |
| ATOM 15754 CB ASN E 200    | -4.026  | -10.568 | 33.453 | 1.00 | 61.81 | C0   |    |
| ANISOU15754 CB ASN E 200   | 5300    | 9860    | 8330   | 640  | -1090 | 1040 | C0 |
| ATOM 15755 CG ASN E 200    | -3.570  | -10.839 | 34.875 | 1.00 | 63.85 | C0   |    |
| ANISOU15755 CG ASN E 200   | 5550    | 10220   | 8490   | 690  | -1350 | 1140 | C0 |
| ATOM 15756 OD1 ASN E 200   | -4.361  | -11.237 | 35.728 | 1.00 | 63.34 | O0   |    |
| ANISOU15756 OD1 ASN E 200  | 5710    | 10090   | 8260   | 700  | -1410 | 1210 | O0 |
| ATOM 15757 ND2 ASN E 200   | -2.288  | -10.643 | 35.140 | 1.00 | 66.10 | N0   |    |
| ANISOU15757 ND2 ASN E 200  | 5570    | 10670   | 8880   | 700  | -1510 | 1140 | N0 |
| ATOM 15758 H ASN E 200     | -5.243  | -9.753  | 31.355 | 1.00 | 57.90 | H0   |    |
| ANISOU15758 H ASN E 200    | 4940    | 9180    | 7880   | 510  | -680  | 870  | H0 |
| ATOM 15759 HA ASN E 200    | -6.042  | -10.586 | 33.855 | 1.00 | 59.07 | H0   |    |
| ANISOU15759 HA ASN E 200   | 5370    | 9340    | 7740   | 570  | -980  | 1040 | H0 |
| ATOM 15760 HB2 ASN E 200   | -3.995  | -11.405 | 32.946 | 1.00 | 61.81 | H0   |    |
| ANISOU15760 HB2 ASN E 200  | 5280    | 9790    | 8420   | 780  | -1010 | 1080 | H0 |
| ATOM 15761 HB3 ASN E 200   | -3.402  | -9.940  | 33.034 | 1.00 | 62.22 | H0   |    |
| ANISOU15761 HB3 ASN E 200  | 5190    | 9990    | 8460   | 570  | -1070 | 980  | H0 |
| ATOM 15762 HD21 ASN E 200  | -2.019  | -10.549 | 35.976 | 1.00 | 67.37 | H0   |    |
| ANISOU15762 HD21 ASN E 200 | 5720    | 10910   | 8970   | 680  | -1670 | 1180 | H0 |
| ATOM 15763 HD22 ASN E 200  | -1.699  | -10.609 | 34.481 | 1.00 | 66.59 | H0   |    |
| ANISOU15763 HD22 ASN E 200 | 5450    | 10770   | 9080   | 720  | -1450 | 1110 | H0 |
| ATOM 15764 N PHE E 201     | -6.465  | -8.374  | 34.889 | 1.00 | 59.53 | N0   |    |
| ANISOU15764 N PHE E 201    | 5560    | 9510    | 7550   | 250  | -1080 | 910  | N0 |
| ATOM 15765 CA PHE E 201    | -6.759  | -7.069  | 35.536 | 1.00 | 59.96 | C0   |    |
| ANISOU15765 CA PHE E 201   | 5720    | 9610    | 7450   | 70   | -1140 | 820  | C0 |
| ATOM 15766 C PHE E 201     | -7.005  | -7.296  | 37.031 | 1.00 | 61.59 | C0   |    |
| ANISOU15766 C PHE E 201    | 6070    | 9870    | 7460   | 70   | -1310 | 890  | C0 |

|                           |         |        |        |      |       |         |
|---------------------------|---------|--------|--------|------|-------|---------|
| ATOM 15767 O PHE E 201    | -7.232  | -8.455 | 37.424 | 1.00 | 61.54 | O0      |
| ANISOU15767 O PHE E 201   | 6120    | 9830   | 7430   | 200  | -1350 | 1000 O0 |
| ATOM 15768 CB PHE E 201   | -7.978  | -6.417 | 34.877 | 1.00 | 57.72 | C0      |
| ANISOU15768 CB PHE E 201  | 5620    | 9210   | 7100   | 0    | -940  | 730 C0  |
| ATOM 15769 CG PHE E 201   | -9.290  | -7.077 | 35.222 | 1.00 | 56.71 | C0      |
| ANISOU15769 CG PHE E 201  | 5700    | 9000   | 6850   | 70   | -870  | 780 C0  |
| ATOM 15770 CD1 PHE E 201  | -9.643  | -8.294 | 34.658 | 1.00 | 55.99 | C0      |
| ANISOU15770 CD1 PHE E 201 | 5610    | 8830   | 6830   | 200  | -780  | 850 C0  |
| ATOM 15771 CD2 PHE E 201  | -10.160 | -6.495 | 36.130 | 1.00 | 56.65 | C0      |
| ANISOU15771 CD2 PHE E 201 | 5890    | 9000   | 6640   | -10  | -890  | 740 C0  |
| ATOM 15772 CE1 PHE E 201  | -10.838 | -8.912 | 34.991 | 1.00 | 55.34 | C0      |
| ANISOU15772 CE1 PHE E 201 | 5720    | 8680   | 6630   | 240  | -710  | 900 C0  |
| ATOM 15773 CE2 PHE E 201  | -11.358 | -7.112 | 36.459 | 1.00 | 56.21 | C0      |
| ANISOU15773 CE2 PHE E 201 | 6010    | 8890   | 6460   | 40   | -820  | 780 C0  |
| ATOM 15774 CZ PHE E 201   | -11.696 | -8.319 | 35.888 | 1.00 | 55.39 | C0      |
| ANISOU15774 CZ PHE E 201  | 5890    | 8710   | 6440   | 150  | -730  | 860 C0  |
| ATOM 15775 H PHE E 201    | -6.993  | -9.043 | 35.212 | 1.00 | 59.25 | H0      |
| ANISOU15775 H PHE E 201   | 5630    | 9420   | 7460   | 330  | -1080 | 970 H0  |
| ATOM 15776 HA PHE E 201   | -5.976  | -6.473 | 35.429 | 1.00 | 60.87 | H0      |
| ANISOU15776 HA PHE E 201  | 5700    | 9800   | 7620   | -10  | -1190 | 780 H0  |
| ATOM 15777 HB2 PHE E 201  | -8.013  | -5.477 | 35.151 | 1.00 | 57.85 | H0      |
| ANISOU15777 HB2 PHE E 201 | 5680    | 9250   | 7040   | -110 | -970  | 660 H0  |
| ATOM 15778 HB3 PHE E 201  | -7.855  | -6.442 | 33.905 | 1.00 | 57.08 | H0      |
| ANISOU15778 HB3 PHE E 201 | 5460    | 9090   | 7140   | 20   | -830  | 710 H0  |
| ATOM 15779 HD1 PHE E 201  | -9.059  | -8.707 | 34.043 | 1.00 | 56.34 | H0      |
| ANISOU15779 HD1 PHE E 201 | 5530    | 8860   | 7010   | 270  | -750  | 870 H0  |
| ATOM 15780 HD2 PHE E 201  | -9.934  | -5.670 | 36.529 | 1.00 | 57.24 | H0      |
| ANISOU15780 HD2 PHE E 201 | 5980    | 9120   | 6650   | -100 | -950  | 690 H0  |
| ATOM 15781 HE1 PHE E 201  | -11.068 | -9.736 | 34.593 | 1.00 | 55.02 | H0      |
| ANISOU15781 HE1 PHE E 201 | 5690    | 8570   | 6650   | 310  | -650  | 940 H0  |
| ATOM 15782 HE2 PHE E 201  | -11.941 | -6.703 | 37.077 | 1.00 | 56.02 | H0      |
| ANISOU15782 HE2 PHE E 201 | 6110    | 8880   | 6300   | -10  | -820  | 750 H0  |
| ATOM 15783 HZ PHE E 201   | -12.513 | -8.736 | 36.110 | 1.00 | 54.89 | H0      |
| ANISOU15783 HZ PHE E 201  | 5950    | 8610   | 6300   | 170  | -670  | 890 H0  |
| ATOM 15784 N ARG E 202    | -6.977  | -6.224 | 37.827 | 1.00 | 63.24 | N0      |
| ANISOU15784 N ARG E 202   | 6360    | 10150  | 7520   | -90  | -1410 | 820 N0  |
| ATOM 15785 CA ARG E 202   | -7.307  | -6.263 | 39.278 | 1.00 | 65.41 | C0      |
| ANISOU15785 CA ARG E 202  | 6810    | 10470  | 7570   | -120 | -1570 | 860 C0  |
| ATOM 15786 C ARG E 202    | -7.703  | -4.866 | 39.768 | 1.00 | 65.79 | C0      |
| ANISOU15786 C ARG E 202   | 7010    | 10530  | 7460   | -300 | -1570 | 730 C0  |
| ATOM 15787 O ARG E 202    | -7.368  | -3.874 | 39.093 | 1.00 | 65.18 | O0      |
| ANISOU15787 O ARG E 202   | 6860    | 10450  | 7460   | -410 | -1510 | 620 O0  |
| ATOM 15788 CB ARG E 202   | -6.132  | -6.826 | 40.086 | 1.00 | 68.76 | C0      |
| ANISOU15788 CB ARG E 202  | 7090    | 11020  | 8010   | -60  | -1820 | 960 C0  |
| ATOM 15789 CG ARG E 202   | -4.891  | -5.947 | 40.142 | 1.00 | 70.90 | C0      |
| ANISOU15789 CG ARG E 202  | 7150    | 11430  | 8350   | -190 | -1960 | 890 C0  |
| ATOM 15790 CD ARG E 202   | -3.856  | -6.589 | 41.048 | 1.00 | 74.33 | C0      |
| ANISOU15790 CD ARG E 202  | 7450    | 12010  | 8780   | -120 | -2240 | 1000 C0 |
| ATOM 15791 NE ARG E 202   | -2.499  | -6.086 | 40.862 | 1.00 | 77.06 | N0      |
| ANISOU15791 NE ARG E 202  | 7500    | 12510  | 9270   | -190 | -2370 | 960 N0  |
| ATOM 15792 CZ ARG E 202   | -1.995  | -4.995 | 41.435 | 1.00 | 78.65 | C0      |
| ANISOU15792 CZ ARG E 202  | 7680    | 12830  | 9380   | -400 | -2510 | 870 C0  |
| ATOM 15793 NH1 ARG E 202  | -2.742  | -4.246 | 42.232 | 1.00 | 78.74 | N0      |
| ANISOU15793 NH1 ARG E 202 | 7970    | 12800  | 9150   | -540 | -2530 | 810 N0  |

|                            |         |        |        |      |       |      |    |
|----------------------------|---------|--------|--------|------|-------|------|----|
| ATOM 15794 NH2 ARG E 202   | -0.743  | -4.646 | 41.193 | 1.00 | 80.00 |      | N0 |
| ANISOU15794 NH2 ARG E 202  | 7550    | 13150  | 9700   | -480 | -2620 | 840  | N0 |
| ATOM 15795 H ARG E 202     | -6.747  | -5.396 | 37.523 | 1.00 | 63.16 |      | H0 |
| ANISOU15795 H ARG E 202    | 6310    | 10150  | 7540   | -190 | -1390 | 740  | H0 |
| ATOM 15796 HA ARG E 202    | -8.080  | -6.861 | 39.396 | 1.00 | 64.64 |      | H0 |
| ANISOU15796 HA ARG E 202   | 6840    | 10310  | 7410   | -50  | -1500 | 910  | H0 |
| ATOM 15797 HB2 ARG E 202   | -6.437  | -6.989 | 41.002 | 1.00 | 69.35 |      | H0 |
| ANISOU15797 HB2 ARG E 202  | 7300    | 11120  | 7930   | -70  | -1910 | 1000 | H0 |
| ATOM 15798 HB3 ARG E 202   | -5.882  | -7.687 | 39.699 | 1.00 | 68.77 |      | H0 |
| ANISOU15798 HB3 ARG E 202  | 7000    | 11000  | 8130   | 70   | -1800 | 1040 | H0 |
| ATOM 15799 HG2 ARG E 202   | -4.517  | -5.841 | 39.241 | 1.00 | 70.50 |      | H0 |
| ANISOU15799 HG2 ARG E 202  | 6950    | 11380  | 8460   | -180 | -1880 | 860  | H0 |
| ATOM 15800 HG3 ARG E 202   | -5.123  | -5.060 | 40.490 | 1.00 | 70.90 |      | H0 |
| ANISOU15800 HG3 ARG E 202  | 7260    | 11440  | 8240   | -330 | -1980 | 810  | H0 |
| ATOM 15801 HD2 ARG E 202   | -4.123  | -6.450 | 41.981 | 1.00 | 75.06 |      | H0 |
| ANISOU15801 HD2 ARG E 202  | 7690    | 12130  | 8700   | -170 | -2340 | 1020 | H0 |
| ATOM 15802 HD3 ARG E 202   | -3.856  | -7.556 | 40.885 | 1.00 | 74.37 |      | H0 |
| ANISOU15802 HD3 ARG E 202  | 7420    | 11980  | 8860   | 40   | -2220 | 1100 | H0 |
| ATOM 15803 HE ARG E 202    | -1.968  | -6.550 | 40.350 | 1.00 | 77.34 |      | H0 |
| ANISOU15803 HE ARG E 202   | 7350    | 12570  | 9460   | -100 | -2360 | 1000 | H0 |
| ATOM 15804 HH11 ARG E 202  | -3.575  | -4.467 | 42.397 | 1.00 | 77.36 |      | H0 |
| ANISOU15804 HH11 ARG E 202 | 7980    | 12540  | 8880   | -500 | -2440 | 820  | H0 |
| ATOM 15805 HH12 ARG E 202  | -2.400  | -3.524 | 42.599 | 1.00 | 79.58 |      | H0 |
| ANISOU15805 HH12 ARG E 202 | 8070    | 12970  | 9200   | -680 | -2620 | 740  | H0 |
| ATOM 15806 HH21 ARG E 202  | -0.243  | -5.140 | 40.661 | 1.00 | 80.58 |      | H0 |
| ANISOU15806 HH21 ARG E 202 | 7430    | 13260  | 9930   | -380 | -2600 | 880  | H0 |
| ATOM 15807 HH22 ARG E 202  | -0.409  | -3.920 | 41.565 | 1.00 | 81.26 |      | H0 |
| ANISOU15807 HH22 ARG E 202 | 7700    | 13380  | 9790   | -630 | -2710 | 780  | H0 |
| ATOM 15808 N LYS E 203     | -8.397  | -4.807 | 40.908 | 1.00 | 67.01 |      | N0 |
| ANISOU15808 N LYS E 203    | 7380    | 10700  | 7380   | -330 | -1630 | 740  | N0 |
| ATOM 15809 CA LYS E 203    | -8.758  | -3.538 | 41.591 | 1.00 | 68.11 |      | C0 |
| ANISOU15809 CA LYS E 203   | 7700    | 10850  | 7330   | -490 | -1650 | 610  | C0 |
| ATOM 15810 C LYS E 203     | -7.467  | -2.871 | 42.077 | 1.00 | 70.12 |      | C0 |
| ANISOU15810 C LYS E 203    | 7830    | 11220  | 7590   | -620 | -1860 | 580  | C0 |
| ATOM 15811 O LYS E 203     | -6.582  | -3.593 | 42.581 | 1.00 | 71.10 |      | O0 |
| ANISOU15811 O LYS E 203    | 7820    | 11450  | 7740   | -570 | -2060 | 680  | O0 |
| ATOM 15812 CB LYS E 203    | -9.727  | -3.800 | 42.751 | 1.00 | 69.28 |      | C0 |
| ANISOU15812 CB LYS E 203   | 8100    | 11000  | 7230   | -470 | -1660 | 640  | C0 |
| ATOM 15813 CG LYS E 203    | -10.303 | -2.549 | 43.403 | 1.00 | 70.35 |      | C0 |
| ANISOU15813 CG LYS E 203   | 8440    | 11120  | 7160   | -610 | -1630 | 500  | C0 |
| ATOM 15814 CD LYS E 203    | -11.026 | -2.801 | 44.715 | 1.00 | 71.75 |      | C0 |
| ANISOU15814 CD LYS E 203   | 8850    | 11340  | 7070   | -610 | -1670 | 530  | C0 |
| ATOM 15815 CE LYS E 203    | -12.198 | -3.752 | 44.586 | 1.00 | 70.75 |      | C0 |
| ANISOU15815 CE LYS E 203   | 8810    | 11150  | 6910   | -490 | -1500 | 600  | C0 |
| ATOM 15816 NZ LYS E 203    | -13.097 | -3.379 | 43.469 | 1.00 | 68.46 |      | N0 |
| ANISOU15816 NZ LYS E 203   | 8510    | 10760  | 6740   | -460 | -1260 | 520  | N0 |
| ATOM 15817 H LYS E 203     | -8.692  | -5.553 | 41.339 | 1.00 | 67.21 |      | H0 |
| ANISOU15817 H LYS E 203    | 7470    | 10720  | 7350   | -250 | -1650 | 820  | H0 |
| ATOM 15818 HA LYS E 203    | -9.196  | -2.946 | 40.937 | 1.00 | 66.82 |      | H0 |
| ANISOU15818 HA LYS E 203   | 7560    | 10610  | 7210   | -520 | -1510 | 530  | H0 |
| ATOM 15819 HB2 LYS E 203   | -10.468 | -4.347 | 42.417 | 1.00 | 68.02 |      | H0 |
| ANISOU15819 HB2 LYS E 203  | 7980    | 10780  | 7090   | -390 | -1530 | 680  | H0 |
| ATOM 15820 HB3 LYS E 203   | -9.257  | -4.320 | 43.435 | 1.00 | 70.69 |      | H0 |
| ANISOU15820 HB3 LYS E 203  | 8260    | 11240  | 7350   | -450 | -1810 | 730  | H0 |

|             |     |     |   |     |         |        |        |       |       |      |    |
|-------------|-----|-----|---|-----|---------|--------|--------|-------|-------|------|----|
| ATOM 15821  | HG2 | LYS | E | 203 | -9.572  | -1.917 | 43.566 | 1.00  | 71.39 |      | H0 |
| ANISOU15821 | HG2 | LYS | E | 203 | 8530    | 11300  | 7300   | -700  | -1740 | 450  | H0 |
| ATOM 15822  | HG3 | LYS | E | 203 | -10.925 | -2.126 | 42.774 | 1.00  | 68.86 |      | H0 |
| ANISOU15822 | HG3 | LYS | E | 203 | 8290    | 10860  | 7010   | -600  | -1480 | 430  | H0 |
| ATOM 15823  | HD2 | LYS | E | 203 | -10.389 | -3.171 | 45.363 | 1.00  | 73.28 |      | H0 |
| ANISOU15823 | HD2 | LYS | E | 203 | 9020    | 11610  | 7210   | -620  | -1840 | 600  | H0 |
| ATOM 15824  | HD3 | LYS | E | 203 | -11.351 | -1.946 | 45.068 | 1.00  | 72.01 |      | H0 |
| ANISOU15824 | HD3 | LYS | E | 203 | 9010    | 11360  | 6980   | -690  | -1650 | 420  | H0 |
| ATOM 15825  | HE2 | LYS | E | 203 | -11.867 | -4.656 | 44.437 | 1.00  | 70.76 |      | H0 |
| ANISOU15825 | HE2 | LYS | E | 203 | 8720    | 11160  | 7000   | -420  | -1540 | 720  | H0 |
| ATOM 15826  | HE3 | LYS | E | 203 | -12.709 | -3.752 | 45.417 | 1.00  | 71.36 |      | H0 |
| ANISOU15826 | HE3 | LYS | E | 203 | 9050    | 11260  | 6810   | -520  | -1500 | 600  | H0 |
| ATOM 15827  | HZ1 | LYS | E | 203 | -13.178 | -2.477 | 43.424 | 1.00  | 68.42 |      | H0 |
| ANISOU15827 | HZ1 | LYS | E | 203 | 8550    | 10740  | 6700   | -520  | -1240 | 420  | H0 |
| ATOM 15828  | HZ2 | LYS | E | 203 | -13.918 | -3.742 | 43.602 | 1.00  | 67.95 |      | H0 |
| ANISOU15828 | HZ2 | LYS | E | 203 | 8530    | 10680  | 6600   | -420  | -1160 | 540  | H0 |
| ATOM 15829  | HZ3 | LYS | E | 203 | -12.761 | -3.689 | 42.685 | 1.00  | 67.71 |      | H0 |
| ANISOU15829 | HZ3 | LYS | E | 203 | 8280    | 10640  | 6810   | -410  | -1240 | 550  | H0 |
| ATOM 15830  | N   | LYS | E | 204 | -7.365  | -1.551 | 41.902 | 1.00  | 70.49 |      | N0 |
| ANISOU15830 | N   | LYS | E | 204 | 7920    | 11250  | 7610   | -780  | -1840 | 440  | N0 |
| ATOM 15831  | CA  | LYS | E | 204 | -6.240  | -0.722 | 42.412 | 1.00  | 73.04 |      | C0 |
| ANISOU15831 | CA  | LYS | E | 204 | 8160    | 11680  | 7910   | -960  | -2040 | 370  | C0 |
| ATOM 15832  | C   | LYS | E | 204 | -6.379  | -0.600 | 43.934 | 1.00  | 74.80 |      | C0 |
| ANISOU15832 | C   | LYS | E | 204 | 8580    | 11970  | 7860   | -1020 | -2210 | 380  | C0 |
| ATOM 15833  | O   | LYS | E | 204 | -7.525  | -0.507 | 44.412 | 1.00  | 74.39 |      | O0 |
| ANISOU15833 | O   | LYS | E | 204 | 8780    | 11850  | 7630   | -990  | -2110 | 350  | O0 |
| ATOM 15834  | CB  | LYS | E | 204 | -6.233  | 0.641  | 41.714 | 1.00  | 72.52 |      | C0 |
| ANISOU15834 | CB  | LYS | E | 204 | 8140    | 11530  | 7880   | -1120 | -1920 | 220  | C0 |
| ATOM 15835  | CG  | LYS | E | 204 | -6.011  | 0.577  | 40.209 | 1.00  | 71.39 |      | C0 |
| ANISOU15835 | CG  | LYS | E | 204 | 7810    | 11320  | 7990   | -1080 | -1760 | 220  | C0 |
| ATOM 15836  | CD  | LYS | E | 204 | -5.794  | 1.926  | 39.559 | 1.00  | 71.78 |      | C0 |
| ANISOU15836 | CD  | LYS | E | 204 | 7900    | 11300  | 8070   | -1260 | -1680 | 90   | C0 |
| ATOM 15837  | CE  | LYS | E | 204 | -6.976  | 2.856  | 39.726 | 1.00  | 71.12 |      | C0 |
| ANISOU15837 | CE  | LYS | E | 204 | 8140    | 11060  | 7820   | -1290 | -1560 | -20  | C0 |
| ATOM 15838  | NZ  | LYS | E | 204 | -7.059  | 3.838  | 38.620 | 1.00  | 70.51 |      | N0 |
| ANISOU15838 | NZ  | LYS | E | 204 | 8110    | 10850  | 7830   | -1380 | -1400 | -110 | N0 |
| ATOM 15839  | H   | LYS | E | 204 | -7.996  | -1.070 | 41.454 | 1.00  | 69.21 |      | H0 |
| ANISOU15839 | H   | LYS | E | 204 | 7850    | 11000  | 7450   | -790  | -1700 | 370  | H0 |
| ATOM 15840  | HA  | LYS | E | 204 | -5.396  | -1.188 | 42.209 | 1.00  | 73.85 |      | H0 |
| ANISOU15840 | HA  | LYS | E | 204 | 8060    | 11860  | 8140   | -930  | -2130 | 440  | H0 |
| ATOM 15841  | HB2 | LYS | E | 204 | -7.091  | 1.083  | 41.886 | 1.00  | 71.80 |      | H0 |
| ANISOU15841 | HB2 | LYS | E | 204 | 8250    | 11350  | 7680   | -1130 | -1830 | 160  | H0 |
| ATOM 15842  | HB3 | LYS | E | 204 | -5.527  | 1.191  | 42.112 | 1.00  | 74.27 |      | H0 |
| ANISOU15842 | HB3 | LYS | E | 204 | 8320    | 11820  | 8070   | -1260 | -2060 | 180  | H0 |
| ATOM 15843  | HG2 | LYS | E | 204 | -5.230  | 0.012  | 40.032 | 1.00  | 72.14 |      | H0 |
| ANISOU15843 | HG2 | LYS | E | 204 | 7700    | 11510  | 8200   | -1040 | -1830 | 290  | H0 |
| ATOM 15844  | HG3 | LYS | E | 204 | -6.789  | 0.148  | 39.795 | 1.00  | 69.70 |      | H0 |
| ANISOU15844 | HG3 | LYS | E | 204 | 7660    | 11030  | 7790   | -960  | -1620 | 250  | H0 |
| ATOM 15845  | HD2 | LYS | E | 204 | -5.000  | 2.347  | 39.952 | 1.00  | 73.55 |      | H0 |
| ANISOU15845 | HD2 | LYS | E | 204 | 8060    | 11600  | 8280   | -1400 | -1810 | 60   | H0 |
| ATOM 15846  | HD3 | LYS | E | 204 | -5.625  | 1.795  | 38.601 | 1.00  | 70.95 |      | H0 |
| ANISOU15846 | HD3 | LYS | E | 204 | 7680    | 11160  | 8120   | -1230 | -1570 | 100  | H0 |
| ATOM 15847  | HE2 | LYS | E | 204 | -7.801  | 2.335  | 39.751 | 1.00  | 69.79 |      | H0 |
| ANISOU15847 | HE2 | LYS | E | 204 | 8050    | 10850  | 7620   | -1160 | -1470 | 20   | H0 |



|                           |         |         |        |       |       |      |    |
|---------------------------|---------|---------|--------|-------|-------|------|----|
| ATOM 15848 HE3 LYS E 204  | -6.896  | 3.336   | 40.571 | 1.00  | 72.36 |      | H0 |
| ANISOU15848 HE3 LYS E 204 | 8410    | 11240   | 7840   | -1390 | -1660 | -70  | H0 |
| ATOM 15849 HZ1 LYS E 204  | -6.270  | 4.278   | 38.539 | 1.00  | 71.67 |      | H0 |
| ANISOU15849 HZ1 LYS E 204 | 8170    | 11030   | 8030   | -1510 | -1470 | -140 | H0 |
| ATOM 15850 HZ2 LYS E 204  | -7.718  | 4.438   | 38.790 | 1.00  | 70.13 |      | H0 |
| ANISOU15850 HZ2 LYS E 204 | 8250    | 10710   | 7680   | -1400 | -1350 | -180 | H0 |
| ATOM 15851 HZ3 LYS E 204  | -7.242  | 3.410   | 37.841 | 1.00  | 69.20 |      | H0 |
| ANISOU15851 HZ3 LYS E 204 | 7860    | 10650   | 7780   | -1290 | -1290 | -70  | H0 |
| ATOM 15852 N GLY E 205    | -5.256  | -0.620  | 44.659 | 1.00  | 77.99 |      | N0 |
| ANISOU15852 N GLY E 205   | 8860    | 12530   | 8240   | -1100 | -2470 | 410  | N0 |
| ATOM 15853 CA GLY E 205   | -5.211  | -0.585  | 46.135 | 1.00  | 80.41 |      | C0 |
| ANISOU15853 CA GLY E 205  | 9340    | 12930   | 8280   | -1170 | -2680 | 420  | C0 |
| ATOM 15854 C GLY E 205    | -5.947  | -1.764  | 46.750 | 1.00  | 80.17 |      | C0 |
| ANISOU15854 C GLY E 205   | 9440    | 12890   | 8130   | -990  | -2670 | 560  | C0 |
| ATOM 15855 O GLY E 205    | -5.462  | -2.394  | 47.687 | 1.00  | 82.16 |      | O0 |
| ANISOU15855 O GLY E 205   | 9690    | 13250   | 8280   | -960  | -2890 | 670  | O0 |
| ATOM 15856 H GLY E 205    | -4.434  | -0.658  | 44.269 | 1.00  | 78.61 |      | H0 |
| ANISOU15856 H GLY E 205   | 8730    | 12670   | 8460   | -1120 | -2530 | 420  | H0 |
| ATOM 15857 HA2 GLY E 205  | -4.265  | -0.597  | 46.429 | 1.00  | 82.25 |      | H0 |
| ANISOU15857 HA2 GLY E 205 | 9430    | 13280   | 8550   | -1220 | -2870 | 450  | H0 |
| ATOM 15858 HA3 GLY E 205  | -5.621  | 0.259   | 46.450 | 1.00  | 80.43 |      | H0 |
| ANISOU15858 HA3 GLY E 205 | 9520    | 12880   | 8150   | -1280 | -2640 | 310  | H0 |
| TER 15859 GLY E 205       |         |         |        |       |       |      |    |
| HETATM15860 OAV H8U A 401 | -54.502 | -20.412 | 21.837 | 1.00  | 40.31 |      | O0 |
| ANISOU15860 OAV H8U A 401 | 4750    | 6380    | 4180   | -930  | 460   | -510 | O0 |
| HETATM15861 CAP H8U A 401 | -53.352 | -20.491 | 22.257 | 1.00  | 39.92 |      | C0 |
| ANISOU15861 CAP H8U A 401 | 4820    | 6150    | 4190   | -890  | 480   | -430 | C0 |
| HETATM15862 NAO H8U A 401 | -53.035 | -21.199 | 23.325 | 1.00  | 40.31 |      | N0 |
| ANISOU15862 NAO H8U A 401 | 4930    | 6110    | 4270   | -970  | 540   | -380 | N0 |
| HETATM15863 CAN H8U A 401 | -51.744 | -21.022 | 23.583 | 1.00  | 40.53 |      | C0 |
| ANISOU15863 CAN H8U A 401 | 5060    | 5980    | 4360   | -880  | 530   | -290 | C0 |
| HETATM15864 CBA H8U A 401 | -51.031 | -21.442 | 24.652 | 1.00  | 41.40 |      | C0 |
| ANISOU15864 CBA H8U A 401 | 5250    | 5980    | 4500   | -890  | 570   | -210 | C0 |
| HETATM15865 OBF H8U A 401 | -51.746 | -22.190 | 25.532 | 1.00  | 43.60 |      | O0 |
| ANISOU15865 OBF H8U A 401 | 5520    | 6290    | 4750   | -1020 | 620   | -210 | O0 |
| HETATM15866 CBE H8U A 401 | -51.211 | -22.645 | 26.712 | 1.00  | 44.84 |      | C0 |
| ANISOU15866 CBE H8U A 401 | 5750    | 6360    | 4920   | -1040 | 660   | -130 | C0 |
| HETATM15867 CBD H8U A 401 | -50.105 | -22.221 | 27.451 | 1.00  | 45.40 |      | C0 |
| ANISOU15867 CBD H8U A 401 | 5870    | 6360    | 5020   | -930  | 640   | -40  | C0 |
| HETATM15868 CBC H8U A 401 | -49.138 | -21.250 | 27.121 | 1.00  | 45.31 |      | C0 |
| ANISOU15868 CBC H8U A 401 | 5850    | 6320    | 5040   | -790  | 580   | -10  | C0 |
| HETATM15869 CBG H8U A 401 | -47.863 | -21.493 | 27.947 | 1.00  | 45.75 |      | C0 |
| ANISOU15869 CBG H8U A 401 | 5990    | 6270    | 5120   | -740  | 580   | 90   | C0 |
| HETATM15870 CBH H8U A 401 | -49.614 | -19.818 | 27.437 | 1.00  | 45.28 |      | C0 |
| ANISOU15870 CBH H8U A 401 | 5750    | 6460    | 5000   | -720  | 540   | -50  | C0 |
| HETATM15871 OBB H8U A 401 | -48.780 | -21.412 | 25.730 | 1.00  | 43.09 |      | O0 |
| ANISOU15871 OBB H8U A 401 | 5600    | 5970    | 4800   | -760  | 570   | -50  | O0 |
| HETATM15872 CAZ H8U A 401 | -49.700 | -21.095 | 24.763 | 1.00  | 41.79 |      | C0 |
| ANISOU15872 CAZ H8U A 401 | 5370    | 5910    | 4600   | -780  | 550   | -140 | C0 |
| HETATM15873 CAY H8U A 401 | -49.147 | -20.317 | 23.750 | 1.00  | 40.61 |      | C0 |
| ANISOU15873 CAY H8U A 401 | 5220    | 5740    | 4470   | -670  | 510   | -150 | C0 |
| HETATM15874 CAX H8U A 401 | -49.928 | -19.895 | 22.680 | 1.00  | 40.13 |      | C0 |
| ANISOU15874 CAX H8U A 401 | 5100    | 5780    | 4370   | -660  | 480   | -230 | C0 |
| HETATM15875 CAM H8U A 401 | -51.217 | -20.243 | 22.597 | 1.00  | 39.98 |      | C0 |

|             |               |         |         |        |       |       |      |    |
|-------------|---------------|---------|---------|--------|-------|-------|------|----|
| ANISOU15875 | CAM H8U A 401 | 5000    | 5890    | 4300   | -760  | 490   | -300 | C0 |
| HETATM15876 | CAH H8U A 401 | -52.221 | -19.929 | 21.639 | 1.00  | 39.33 |      | C0 |
| ANISOU15876 | CAH H8U A 401 | 4820    | 5960    | 4160   | -760  | 450   | -380 | C0 |
| HETATM15877 | CAI H8U A 401 | -52.401 | -18.416 | 21.481 | 1.00  | 38.29 |      | C0 |
| ANISOU15877 | CAI H8U A 401 | 4620    | 5930    | 4000   | -590  | 400   | -380 | C0 |
| HETATM15878 | CAG H8U A 401 | -52.016 | -20.502 | 20.168 | 1.00  | 39.47 |      | C0 |
| ANISOU15878 | CAG H8U A 401 | 4890    | 5940    | 4170   | -790  | 450   | -430 | C0 |
| HETATM15879 | CBI H8U A 401 | -52.382 | -21.994 | 20.077 | 1.00  | 40.32 |      | C0 |
| ANISOU15879 | CBI H8U A 401 | 5030    | 6000    | 4280   | -980  | 510   | -480 | C0 |
| HETATM15880 | CBJ H8U A 401 | -50.584 | -20.342 | 19.638 | 1.00  | 38.72 |      | C0 |
| ANISOU15880 | CBJ H8U A 401 | 4910    | 5670    | 4140   | -690  | 450   | -370 | C0 |
| HETATM15881 | CAC H8U A 401 | -53.088 | -19.642 | 19.436 | 1.00  | 39.44 |      | C0 |
| ANISOU15881 | CAC H8U A 401 | 4750    | 6140    | 4090   | -720  | 390   | -490 | C0 |
| HETATM15882 | CAB H8U A 401 | -53.174 | -19.585 | 17.869 | 1.00  | 39.29 |      | C0 |
| ANISOU15882 | CAB H8U A 401 | 4730    | 6180    | 4020   | -700  | 350   | -550 | C0 |
| HETATM15883 | CAA H8U A 401 | -53.483 | -18.107 | 17.543 | 1.00  | 38.89 |      | C0 |
| ANISOU15883 | CAA H8U A 401 | 4610    | 6240    | 3920   | -510  | 280   | -530 | C0 |
| HETATM15884 | CAR H8U A 401 | -54.486 | -17.575 | 18.426 | 1.00  | 39.49 |      | C0 |
| ANISOU15884 | CAR H8U A 401 | 4570    | 6470    | 3960   | -480  | 270   | -540 | C0 |
| HETATM15885 | OAU H8U A 401 | -55.559 | -17.099 | 18.051 | 1.00  | 40.63 |      | O0 |
| ANISOU15885 | OAU H8U A 401 | 4590    | 6820    | 4030   | -430  | 220   | -600 | O0 |
| HETATM15886 | NAS H8U A 401 | -54.194 | -17.601 | 19.739 | 1.00  | 38.88 |      | N0 |
| ANISOU15886 | NAS H8U A 401 | 4510    | 6320    | 3940   | -510  | 310   | -500 | N0 |
| HETATM15887 | CAT H8U A 401 | -55.128 | -17.102 | 20.780 | 1.00  | 39.72 |      | C0 |
| ANISOU15887 | CAT H8U A 401 | 4510    | 6570    | 4020   | -490  | 310   | -520 | C0 |
| HETATM15888 | CAD H8U A 401 | -52.886 | -18.220 | 20.003 | 1.00  | 38.23 |      | C0 |
| ANISOU15888 | CAD H8U A 401 | 4580    | 6010    | 3940   | -560  | 350   | -440 | C0 |
| HETATM15889 | CAE H8U A 401 | -51.902 | -17.339 | 19.203 | 1.00  | 37.20 |      | C0 |
| ANISOU15889 | CAE H8U A 401 | 4520    | 5780    | 3830   | -410  | 330   | -390 | C0 |
| HETATM15890 | NAF H8U A 401 | -52.231 | -17.362 | 17.760 | 1.00  | 37.72 |      | N0 |
| ANISOU15890 | NAF H8U A 401 | 4570    | 5920    | 3840   | -390  | 290   | -440 | N0 |
| HETATM15891 | CAJ H8U A 401 | -52.431 | -16.057 | 17.105 | 1.00  | 37.68 |      | C0 |
| ANISOU15891 | CAJ H8U A 401 | 4550    | 5990    | 3780   | -220  | 240   | -430 | C0 |
| HETATM15892 | CAK H8U A 401 | -53.385 | -16.333 | 15.936 | 1.00  | 38.82 |      | C0 |
| ANISOU15892 | CAK H8U A 401 | 4610    | 6310    | 3830   | -240  | 200   | -500 | C0 |
| HETATM15893 | CAL H8U A 401 | -53.663 | -17.834 | 16.026 | 1.00  | 39.03 |      | C0 |
| ANISOU15893 | CAL H8U A 401 | 4620    | 6340    | 3870   | -450  | 230   | -570 | C0 |
| HETATM15894 | CAQ H8U A 401 | -55.046 | -18.184 | 15.456 | 1.00  | 40.21 |      | C0 |
| ANISOU15894 | CAQ H8U A 401 | 4630    | 6740    | 3910   | -520  | 190   | -670 | C0 |
| HETATM15895 | OAW H8U A 401 | -52.653 | -18.510 | 15.296 | 1.00  | 38.47 |      | O0 |
| ANISOU15895 | OAW H8U A 401 | 4670    | 6110    | 3830   | -500  | 270   | -560 | O0 |
| HETATM15896 | HAO H8U A 401 | -53.688 | -21.648 | 23.932 | 1.00  | 41.17 |      | H0 |
| ANISOU15896 | HAO H8U A 401 | 5010    | 6270    | 4360   | -1070 | 570   | -400 | H0 |
| HETATM15897 | HBE H8U A 401 | -51.795 | -23.429 | 27.194 | 1.00  | 45.78 |      | H0 |
| ANISOU15897 | HBE H8U A 401 | 5890    | 6490    | 5020   | -1160 | 710   | -130 | H0 |
| HETATM15898 | HBD H8U A 401 | -49.940 | -22.773 | 28.377 | 1.00  | 45.71 |      | H0 |
| ANISOU15898 | HBD H8U A 401 | 5960    | 6360    | 5050   | -980  | 670   | 30   | H0 |
| HETATM15899 | HBG H8U A 401 | -47.252 | -20.586 | 27.941 | 1.00  | 44.86 |      | H0 |
| ANISOU15899 | HBG H8U A 401 | 5850    | 6180    | 5020   | -650  | 540   | 100  | H0 |
| HETATM15900 | HBH H8U A 401 | -47.292 | -22.308 | 27.500 | 1.00  | 45.74 |      | H0 |
| ANISOU15900 | HBH H8U A 401 | 6060    | 6160    | 5160   | -740  | 610   | 120  | H0 |
| HETATM15901 | HBI H8U A 401 | -48.115 | -21.746 | 28.978 | 1.00  | 45.99 |      | H0 |
| ANISOU15901 | HBI H8U A 401 | 6020    | 6330    | 5120   | -780  | 610   | 130  | H0 |
| HETATM15902 | HBJ H8U A 401 | -50.657 | -19.707 | 27.142 | 1.00  | 45.57 |      | H0 |

|             |               |         |         |        |       |       |      |    |
|-------------|---------------|---------|---------|--------|-------|-------|------|----|
| ANISOU15902 | HBJ H8U A 401 | 5710    | 6600    | 5000   | -760  | 540   | -120 | H0 |
| HETATM15903 | HBK H8U A 401 | -49.004 | -19.102 | 26.886 | 1.00  | 44.50 |      | H0 |
| ANISOU15903 | HBK H8U A 401 | 5650    | 6330    | 4920   | -630  | 510   | -50  | H0 |
| HETATM15904 | HBL H8U A 401 | -49.519 | -19.628 | 28.506 | 1.00  | 45.20 |      | H0 |
| ANISOU15904 | HBL H8U A 401 | 5730    | 6470    | 4970   | -720  | 540   | -20  | H0 |
| HETATM15905 | HAY H8U A 401 | -48.113 | -20.029 | 23.802 | 1.00  | 39.91 |      | H0 |
| ANISOU15905 | HAY H8U A 401 | 5180    | 5570    | 4420   | -600  | 500   | -100 | H0 |
| HETATM15906 | HAX H8U A 401 | -49.476 | -19.282 | 21.910 | 1.00  | 39.56 |      | H0 |
| ANISOU15906 | HAX H8U A 401 | 5030    | 5690    | 4310   | -580  | 450   | -230 | H0 |
| HETATM15907 | HAJ H8U A 401 | -53.189 | -18.008 | 22.021 | 1.00  | 38.68 |      | H0 |
| ANISOU15907 | HAJ H8U A 401 | 4590    | 6090    | 4010   | -580  | 390   | -400 | H0 |
| HETATM15908 | HAI H8U A 401 | -51.526 | -17.832 | 21.494 | 1.00  | 37.54 |      | H0 |
| ANISOU15908 | HAI H8U A 401 | 4590    | 5740    | 3940   | -500  | 390   | -330 | H0 |
| HETATM15909 | HBM H8U A 401 | -51.968 | -22.403 | 19.158 | 1.00  | 40.44 |      | H0 |
| ANISOU15909 | HBM H8U A 401 | 5110    | 5950    | 4310   | -990  | 520   | -500 | H0 |
| HETATM15910 | HBN H8U A 401 | -53.464 | -22.128 | 20.065 | 1.00  | 41.23 |      | H0 |
| ANISOU15910 | HBN H8U A 401 | 5060    | 6270    | 4340   | -1060 | 510   | -550 | H0 |
| HETATM15911 | HBO H8U A 401 | -51.955 | -22.530 | 20.926 | 1.00  | 40.27 |      | H0 |
| ANISOU15911 | HBO H8U A 401 | 5090    | 5890    | 4320   | -1020 | 560   | -420 | H0 |
| HETATM15912 | HBQ H8U A 401 | -50.565 | -20.440 | 18.556 | 1.00  | 38.87 |      | H0 |
| ANISOU15912 | HBQ H8U A 401 | 4940    | 5700    | 4140   | -690  | 440   | -410 | H0 |
| HETATM15913 | HBR H8U A 401 | -49.962 | -21.127 | 20.068 | 1.00  | 38.61 |      | H0 |
| ANISOU15913 | HBR H8U A 401 | 4970    | 5530    | 4170   | -750  | 500   | -330 | H0 |
| HETATM15914 | HBP H8U A 401 | -50.169 | -19.384 | 19.919 | 1.00  | 38.00 |      | H0 |
| ANISOU15914 | HBP H8U A 401 | 4810    | 5570    | 4060   | -580  | 430   | -320 | H0 |
| HETATM15915 | HAD H8U A 401 | -54.065 | -19.993 | 19.743 | 1.00  | 40.22 |      | H0 |
| ANISOU15915 | HAD H8U A 401 | 4770    | 6370    | 4150   | -820  | 400   | -550 | H0 |
| HETATM15916 | HAB H8U A 401 | -52.243 | -19.904 | 17.409 | 1.00  | 38.89 |      | H0 |
| ANISOU15916 | HAB H8U A 401 | 4780    | 5980    | 4010   | -690  | 370   | -520 | H0 |
| HETATM15917 | HAC H8U A 401 | -53.991 | -20.217 | 17.522 | 1.00  | 40.35 |      | H0 |
| ANISOU15917 | HAC H8U A 401 | 4810    | 6420    | 4110   | -810  | 350   | -620 | H0 |
| HETATM15918 | HAU H8U A 401 | -56.031 | -16.687 | 20.337 | 1.00  | 40.41 |      | H0 |
| ANISOU15918 | HAU H8U A 401 | 4490    | 6820    | 4040   | -440  | 270   | -570 | H0 |
| HETATM15919 | HAV H8U A 401 | -54.652 | -16.322 | 21.374 | 1.00  | 38.95 |      | H0 |
| ANISOU15919 | HAV H8U A 401 | 4450    | 6400    | 3950   | -400  | 310   | -470 | H0 |
| HETATM15920 | HAT H8U A 401 | -55.422 | -17.913 | 21.446 | 1.00  | 39.96 |      | H0 |
| ANISOU15920 | HAT H8U A 401 | 4520    | 6610    | 4050   | -630  | 350   | -540 | H0 |
| HETATM15921 | HAF H8U A 401 | -51.975 | -16.317 | 19.576 | 1.00  | 37.01 |      | H0 |
| ANISOU15921 | HAF H8U A 401 | 4480    | 5790    | 3790   | -300  | 310   | -370 | H0 |
| HETATM15922 | HAE H8U A 401 | -50.880 | -17.673 | 19.322 | 1.00  | 36.63 |      | H0 |
| ANISOU15922 | HAE H8U A 401 | 4540    | 5560    | 3810   | -420  | 350   | -350 | H0 |
| HETATM15923 | HAL H8U A 401 | -52.879 | -15.338 | 17.780 | 1.00  | 37.80 |      | H0 |
| ANISOU15923 | HAL H8U A 401 | 4510    | 6070    | 3780   | -150  | 230   | -420 | H0 |
| HETATM15924 | HAK H8U A 401 | -51.480 | -15.673 | 16.732 | 1.00  | 37.07 |      | H0 |
| ANISOU15924 | HAK H8U A 401 | 4560    | 5790    | 3730   | -160  | 250   | -380 | H0 |
| HETATM15925 | HAN H8U A 401 | -54.299 | -15.752 | 16.060 | 1.00  | 39.41 |      | H0 |
| ANISOU15925 | HAN H8U A 401 | 4580    | 6540    | 3850   | -170  | 160   | -520 | H0 |
| HETATM15926 | HAM H8U A 401 | -52.905 | -16.087 | 14.987 | 1.00  | 38.66 |      | H0 |
| ANISOU15926 | HAM H8U A 401 | 4650    | 6250    | 3790   | -180  | 180   | -480 | H0 |
| HETATM15927 | HAQ H8U A 401 | -54.927 | -18.617 | 14.463 | 1.00  | 40.70 |      | H0 |
| ANISOU15927 | HAQ H8U A 401 | 4720    | 6800    | 3940   | -560  | 190   | -700 | H0 |
| HETATM15928 | HAR H8U A 401 | -55.669 | -17.292 | 15.384 | 1.00  | 40.72 |      | H0 |
| ANISOU15928 | HAR H8U A 401 | 4610    | 6940    | 3920   | -400  | 150   | -660 | H0 |
| HETATM15929 | HAS H8U A 401 | -55.532 | -18.905 | 16.102 | 1.00  | 40.76 |      | H0 |

|                           |         |         |         |      |       |       |    |
|---------------------------|---------|---------|---------|------|-------|-------|----|
| ANISOU15929 HAS H8U A 401 | 4650    | 6840    | 3990    | -660 | 230   | -710  | H0 |
| HETATM15930 HBS H8U A 401 | -51.480 | -17.823 | 17.288  | 1.00 | 37.39 |       | H0 |
| ANISOU15930 HBS H8U A 401 | 4610    | 5770    | 3830    | -420 | 310   | -430  | H0 |
| HETATM15931 C1 NAG A 402  | -24.551 | -29.521 | -12.435 | 1.00 | 57.38 |       | C0 |
| ANISOU15931 C1 NAG A 402  | 9240    | 6390    | 6170    | -140 | 3080  | -1920 | C0 |
| HETATM15932 C2 NAG A 402  | -25.385 | -30.545 | -13.190 | 1.00 | 58.47 |       | C0 |
| ANISOU15932 C2 NAG A 402  | 9540    | 6460    | 6220    | -240 | 3120  | -2070 | C0 |
| HETATM15933 C3 NAG A 402  | -24.469 | -31.603 | -13.765 | 1.00 | 60.51 |       | C0 |
| ANISOU15933 C3 NAG A 402  | 9860    | 6600    | 6530    | -170 | 3330  | -2200 | C0 |
| HETATM15934 C4 NAG A 402  | -23.418 | -30.958 | -14.649 | 1.00 | 61.30 |       | C0 |
| ANISOU15934 C4 NAG A 402  | 9920    | 6810    | 6560    | -150 | 3440  | -2220 | C0 |
| HETATM15935 C5 NAG A 402  | -22.756 | -29.764 | -13.978 | 1.00 | 60.35 |       | C0 |
| ANISOU15935 C5 NAG A 402  | 9630    | 6800    | 6500    | -80  | 3370  | -2060 | C0 |
| HETATM15936 C6 NAG A 402  | -21.986 | -28.986 | -15.039 | 1.00 | 61.55 |       | C0 |
| ANISOU15936 C6 NAG A 402  | 9770    | 7080    | 6530    | -110 | 3470  | -2080 | C0 |
| HETATM15937 C7 NAG A 402  | -27.626 | -31.348 | -12.635 | 1.00 | 57.44 |       | C0 |
| ANISOU15937 C7 NAG A 402  | 9520    | 6260    | 6040    | -410 | 2950  | -2120 | C0 |
| HETATM15938 C8 NAG A 402  | -28.510 | -32.032 | -11.625 | 1.00 | 56.65 |       | C0 |
| ANISOU15938 C8 NAG A 402  | 9440    | 6060    | 6030    | -440 | 2870  | -2110 | C0 |
| HETATM15939 N2 NAG A 402  | -26.342 | -31.182 | -12.309 | 1.00 | 57.76 |       | N0 |
| ANISOU15939 N2 NAG A 402  | 9480    | 6270    | 6200    | -260 | 3030  | -2060 | N0 |
| HETATM15940 O3 NAG A 402  | -25.234 | -32.503 | -14.532 | 1.00 | 62.13 |       | O0 |
| ANISOU15940 O3 NAG A 402  | 10230   | 6740    | 6630    | -290 | 3370  | -2360 | O0 |
| HETATM15941 O4 NAG A 402  | -22.406 | -31.896 | -14.936 | 1.00 | 62.99 |       | O0 |
| ANISOU15941 O4 NAG A 402  | 10150   | 6920    | 6860    | -40  | 3620  | -2320 | O0 |
| HETATM15942 O5 NAG A 402  | -23.695 | -28.899 | -13.368 | 1.00 | 58.33 |       | O0 |
| ANISOU15942 O5 NAG A 402  | 9340    | 6610    | 6210    | -140 | 3180  | -1940 | O0 |
| HETATM15943 O6 NAG A 402  | -21.355 | -27.896 | -14.419 | 1.00 | 61.20 |       | O0 |
| ANISOU15943 O6 NAG A 402  | 9580    | 7130    | 6550    | -70  | 3420  | -1950 | O0 |
| HETATM15944 O7 NAG A 402  | -28.094 | -30.970 | -13.705 | 1.00 | 57.39 |       | O0 |
| ANISOU15944 O7 NAG A 402  | 9570    | 6390    | 5850    | -520 | 2930  | -2190 | O0 |
| HETATM15945 H1 NAG A 402  | -23.938 | -30.056 | -11.709 | 1.00 | 57.52 |       | H0 |
| ANISOU15945 H1 NAG A 402  | 9200    | 6310    | 6340    | -20  | 3130  | -1900 | H0 |
| HETATM15946 H2 NAG A 402  | -25.911 | -30.019 | -13.985 | 1.00 | 58.56 |       | H0 |
| ANISOU15946 H2 NAG A 402  | 9600    | 6580    | 6070    | -340 | 3080  | -2100 | H0 |
| HETATM15947 H3 NAG A 402  | -24.001 | -32.138 | -12.939 | 1.00 | 60.56 |       | H0 |
| ANISOU15947 H3 NAG A 402  | 9820    | 6490    | 6690    | -50  | 3360  | -2170 | H0 |
| HETATM15948 H4 NAG A 402  | -23.899 | -30.652 | -15.578 | 1.00 | 61.68 |       | H0 |
| ANISOU15948 H4 NAG A 402  | 10040   | 6950    | 6440    | -260 | 3430  | -2270 | H0 |
| HETATM15949 H5 NAG A 402  | -22.044 | -30.137 | -13.242 | 1.00 | 60.41 |       | H0 |
| ANISOU15949 H5 NAG A 402  | 9550    | 6740    | 6660    | 50   | 3410  | -2020 | H0 |
| HETATM15950 H61 NAG A 402 | -22.670 | -28.657 | -15.822 | 1.00 | 61.59 |       | H0 |
| ANISOU15950 H61 NAG A 402 | 9860    | 7160    | 6380    | -230 | 3430  | -2110 | H0 |
| HETATM15951 H62 NAG A 402 | -21.233 | -29.627 | -15.496 | 1.00 | 63.01 |       | H0 |
| ANISOU15951 H62 NAG A 402 | 9970    | 7230    | 6750    | -60  | 3620  | -2170 | H0 |
| HETATM15952 H81 NAG A 402 | -27.902 | -32.550 | -10.884 | 1.00 | 56.79 |       | H0 |
| ANISOU15952 H81 NAG A 402 | 9440    | 5940    | 6200    | -330 | 2930  | -2070 | H0 |
| HETATM15953 H82 NAG A 402 | -29.148 | -32.754 | -12.135 | 1.00 | 57.83 |       | H0 |
| ANISOU15953 H82 NAG A 402 | 9700    | 6170    | 6100    | -550 | 2900  | -2230 | H0 |
| HETATM15954 H83 NAG A 402 | -29.133 | -31.296 | -11.119 | 1.00 | 55.40 |       | H0 |
| ANISOU15954 H83 NAG A 402 | 9210    | 5990    | 5840    | -470 | 2730  | -2010 | H0 |
| HETATM15955 HN2 NAG A 402 | -26.005 | -31.512 | -11.416 | 1.00 | 57.34 |       | H0 |
| ANISOU15955 HN2 NAG A 402 | 9370    | 6120    | 6290    | -170 | 3040  | -2000 | H0 |
| HETATM15956 OAV H8U B 401 | -59.852 | 13.253  | 25.544  | 1.00 | 45.60 |       | O0 |

|                           |         |        |        |      |       |      |    |
|---------------------------|---------|--------|--------|------|-------|------|----|
| ANISOU15956 OAV H8U B 401 | 6830    | 5550   | 4950   | 1450 | 80    | 60   | O0 |
| HETATM15957 CAP H8U B 401 | -59.457 | 12.184 | 26.000 | 1.00 | 44.22 |      | C0 |
| ANISOU15957 CAP H8U B 401 | 6500    | 5480   | 4820   | 1280 | 80    | 10   | C0 |
| HETATM15958 NAO H8U B 401 | -59.847 | 11.745 | 27.179 | 1.00 | 44.20 |      | N0 |
| ANISOU15958 NAO H8U B 401 | 6430    | 5540   | 4830   | 1310 | 130   | -50  | N0 |
| HETATM15959 CAN H8U B 401 | -59.250 | 10.594 | 27.427 | 1.00 | 43.89 |      | C0 |
| ANISOU15959 CAN H8U B 401 | 6250    | 5580   | 4840   | 1100 | 120   | -80  | C0 |
| HETATM15960 CBA H8U B 401 | -59.276 | 9.863  | 28.568 | 1.00 | 44.93 |      | C0 |
| ANISOU15960 CBA H8U B 401 | 6310    | 5780   | 4990   | 1050 | 160   | -130 | C0 |
| HETATM15961 OBF H8U B 401 | -60.078 | 10.382 | 29.552 | 1.00 | 48.01 |      | O0 |
| ANISOU15961 OBF H8U B 401 | 6770    | 6150   | 5320   | 1240 | 240   | -160 | O0 |
| HETATM15962 CBE H8U B 401 | -59.933 | 9.998  | 30.865 | 1.00 | 48.60 |      | C0 |
| ANISOU15962 CBE H8U B 401 | 6880    | 6220   | 5370   | 1200 | 290   | -210 | C0 |
| HETATM15963 CBD H8U B 401 | -59.075 | 9.094  | 31.492 | 1.00 | 48.06 |      | C0 |
| ANISOU15963 CBD H8U B 401 | 6780    | 6160   | 5330   | 1010 | 270   | -250 | C0 |
| HETATM15964 CBC H8U B 401 | -58.090 | 8.227  | 30.961 | 1.00 | 47.38 |      | C0 |
| ANISOU15964 CBC H8U B 401 | 6600    | 6100   | 5300   | 790  | 200   | -250 | C0 |
| HETATM15965 CBG H8U B 401 | -58.033 | 6.967  | 31.862 | 1.00 | 46.58 |      | C0 |
| ANISOU15965 CBG H8U B 401 | 6370    | 6110   | 5220   | 700  | 240   | -270 | C0 |
| HETATM15966 CBH H8U B 401 | -56.686 | 8.881  | 30.924 | 1.00 | 47.42 |      | C0 |
| ANISOU15966 CBH H8U B 401 | 6800    | 5930   | 5300   | 640  | 130   | -270 | C0 |
| HETATM15967 OBB H8U B 401 | -58.441 | 7.785  | 29.647 | 1.00 | 44.65 |      | O0 |
| ANISOU15967 OBB H8U B 401 | 6080    | 5870   | 5010   | 770  | 170   | -190 | O0 |
| HETATM15968 CAZ H8U B 401 | -58.538 | 8.698  | 28.639 | 1.00 | 43.87 |      | C0 |
| ANISOU15968 CAZ H8U B 401 | 6050    | 5710   | 4900   | 850  | 140   | -150 | C0 |
| HETATM15969 CAY H8U B 401 | -57.791 | 8.333  | 27.524 | 1.00 | 42.26 |      | C0 |
| ANISOU15969 CAY H8U B 401 | 5800    | 5520   | 4740   | 700  | 70    | -120 | C0 |
| HETATM15970 CAX H8U B 401 | -57.791 | 9.134  | 26.386 | 1.00 | 41.73 |      | C0 |
| ANISOU15970 CAX H8U B 401 | 5810    | 5400   | 4650   | 760  | 40    | -70  | C0 |
| HETATM15971 CAM H8U B 401 | -58.516 | 10.253 | 26.335 | 1.00 | 42.62 |      | C0 |
| ANISOU15971 CAM H8U B 401 | 6040    | 5430   | 4710   | 950  | 60    | -40  | C0 |
| HETATM15972 CAH H8U B 401 | -58.666 | 11.243 | 25.320 | 1.00 | 42.76 |      | C0 |
| ANISOU15972 CAH H8U B 401 | 6180    | 5370   | 4690   | 1060 | 30    | 20   | C0 |
| HETATM15973 CAI H8U B 401 | -57.312 | 11.854 | 24.889 | 1.00 | 41.76 |      | C0 |
| ANISOU15973 CAI H8U B 401 | 6250    | 5050   | 4560   | 890  | 0     | 40   | C0 |
| HETATM15974 CAG H8U B 401 | -59.375 | 10.785 | 23.973 | 1.00 | 42.36 |      | C0 |
| ANISOU15974 CAG H8U B 401 | 5950    | 5500   | 4650   | 1120 | -10   | 80   | C0 |
| HETATM15975 CBI H8U B 401 | -60.902 | 10.721 | 24.128 | 1.00 | 43.90 |      | C0 |
| ANISOU15975 CBI H8U B 401 | 5980    | 5860   | 4830   | 1350 | 10    | 90   | C0 |
| HETATM15976 CBJ H8U B 401 | -58.901 | 9.425  | 23.437 | 1.00 | 41.05 |      | C0 |
| ANISOU15976 CBJ H8U B 401 | 5590    | 5480   | 4540   | 930  | -50   | 70   | C0 |
| HETATM15977 CAC H8U B 401 | -59.006 | 11.999 | 23.096 | 1.00 | 42.84 |      | C0 |
| ANISOU15977 CAC H8U B 401 | 6240    | 5390   | 4650   | 1180 | -30   | 150  | C0 |
| HETATM15978 CAB H8U B 401 | -59.255 | 11.987 | 21.565 | 1.00 | 42.57 |      | C0 |
| ANISOU15978 CAB H8U B 401 | 6150    | 5440   | 4590   | 1230 | -90   | 230  | C0 |
| HETATM15979 CAA H8U B 401 | -58.060 | 12.747 | 20.960 | 1.00 | 42.44 |      | C0 |
| ANISOU15979 CAA H8U B 401 | 6360    | 5220   | 4540   | 1110 | -90   | 270  | C0 |
| HETATM15980 CAR H8U B 401 | -57.722 | 13.906 | 21.727 | 1.00 | 43.30 |      | C0 |
| ANISOU15980 CAR H8U B 401 | 6740    | 5090   | 4630   | 1140 | -50   | 270  | C0 |
| HETATM15981 OAU H8U B 401 | -57.688 | 15.048 | 21.271 | 1.00 | 45.05 |      | O0 |
| ANISOU15981 OAU H8U B 401 | 7190    | 5130   | 4790   | 1230 | -40   | 330  | O0 |
| HETATM15982 NAS H8U B 401 | -57.395 | 13.692 | 23.012 | 1.00 | 42.97 |      | N0 |
| ANISOU15982 NAS H8U B 401 | 6700    | 5000   | 4620   | 1050 | -20   | 180  | N0 |
| HETATM15983 CAT H8U B 401 | -57.034 | 14.784 | 23.952 | 1.00 | 44.05 |      | C0 |

|             |               |         |        |        |      |       |      |    |
|-------------|---------------|---------|--------|--------|------|-------|------|----|
| ANISOU15983 | CAT H8U B 401 | 7110    | 4890   | 4730   | 1060 | 10    | 150  | C0 |
| HETATM15984 | CAD H8U B 401 | -57.529 | 12.270 | 23.382 | 1.00 | 41.88 |      | C0 |
| ANISOU15984 | CAD H8U B 401 | 6290    | 5080   | 4550   | 960  | -30   | 130  | C0 |
| HETATM15985 | CAE H8U B 401 | -56.572 | 11.525 | 22.410 | 1.00 | 40.54 |      | C0 |
| ANISOU15985 | CAE H8U B 401 | 6020    | 4970   | 4410   | 760  | -60   | 160  | C0 |
| HETATM15986 | NAF H8U B 401 | -56.932 | 11.798 | 20.997 | 1.00 | 41.17 |      | N0 |
| ANISOU15986 | NAF H8U B 401 | 6110    | 5090   | 4440   | 850  | -90   | 240  | N0 |
| HETATM15987 | CAJ H8U B 401 | -55.894 | 12.413 | 20.144 | 1.00 | 41.04 |      | C0 |
| ANISOU15987 | CAJ H8U B 401 | 6260    | 4940   | 4400   | 730  | -90   | 300  | C0 |
| HETATM15988 | CAK H8U B 401 | -56.673 | 13.189 | 19.059 | 1.00 | 42.58 |      | C0 |
| ANISOU15988 | CAK H8U B 401 | 6550    | 5120   | 4510   | 930  | -110  | 390  | C0 |
| HETATM15989 | CAL H8U B 401 | -58.161 | 12.964 | 19.411 | 1.00 | 42.87 |      | C0 |
| ANISOU15989 | CAL H8U B 401 | 6440    | 5310   | 4540   | 1160 | -130  | 370  | C0 |
| HETATM15990 | CAQ H8U B 401 | -59.046 | 14.144 | 18.956 | 1.00 | 44.46 |      | C0 |
| ANISOU15990 | CAQ H8U B 401 | 6800    | 5440   | 4650   | 1440 | -140  | 440  | C0 |
| HETATM15991 | OAW H8U B 401 | -58.642 | 11.753 | 18.789 | 1.00 | 41.22 |      | O0 |
| ANISOU15991 | OAW H8U B 401 | 5970    | 5350   | 4340   | 1140 | -180  | 350  | O0 |
| HETATM15992 | HAO H8U B 401 | -60.398 | 12.262 | 27.834 | 1.00 | 45.56 |      | H0 |
| ANISOU15992 | HAO H8U B 401 | 6680    | 5670   | 4960   | 1460 | 180   | -60  | H0 |
| HETATM15993 | HBE H8U B 401 | -60.597 | 10.521 | 31.552 | 1.00 | 49.88 |      | H0 |
| ANISOU15993 | HBE H8U B 401 | 7110    | 6360   | 5480   | 1370 | 360   | -230 | H0 |
| HETATM15994 | HBD H8U B 401 | -59.211 | 9.034  | 32.573 | 1.00 | 48.48 |      | H0 |
| ANISOU15994 | HBD H8U B 401 | 6880    | 6200   | 5330   | 1050 | 320   | -290 | H0 |
| HETATM15995 | HBG H8U B 401 | -57.248 | 7.071  | 32.612 | 1.00 | 46.46 |      | H0 |
| ANISOU15995 | HBG H8U B 401 | 6480    | 6000   | 5170   | 630  | 220   | -310 | H0 |
| HETATM15996 | HBH H8U B 401 | -57.830 | 6.089  | 31.253 | 1.00 | 45.55 |      | H0 |
| ANISOU15996 | HBH H8U B 401 | 6100    | 6060   | 5140   | 590  | 210   | -250 | H0 |
| HETATM15997 | HBI H8U B 401 | -58.991 | 6.822  | 32.366 | 1.00 | 47.23 |      | H0 |
| ANISOU15997 | HBI H8U B 401 | 6390    | 6270   | 5280   | 820  | 320   | -270 | H0 |
| HETATM15998 | HBJ H8U B 401 | -56.779 | 9.911  | 30.584 | 1.00 | 48.29 |      | H0 |
| ANISOU15998 | HBJ H8U B 401 | 7050    | 5920   | 5380   | 720  | 120   | -260 | H0 |
| HETATM15999 | HBK H8U B 401 | -56.045 | 8.328  | 30.237 | 1.00 | 46.36 |      | H0 |
| ANISOU15999 | HBK H8U B 401 | 6570    | 5830   | 5210   | 510  | 80    | -240 | H0 |
| HETATM16000 | HBL H8U B 401 | -56.243 | 8.877  | 31.919 | 1.00 | 47.46 |      | H0 |
| ANISOU16000 | HBL H8U B 401 | 6890    | 5870   | 5270   | 600  | 130   | -310 | H0 |
| HETATM16001 | HAY H8U B 401 | -57.208 | 7.429  | 27.539 | 1.00 | 40.99 |      | H0 |
| ANISOU16001 | HAY H8U B 401 | 5550    | 5410   | 4610   | 560  | 60    | -130 | H0 |
| HETATM16002 | HAX H8U B 401 | -57.194 | 8.832  | 25.532 | 1.00 | 41.25 |      | H0 |
| ANISOU16002 | HAX H8U B 401 | 5710    | 5350   | 4610   | 650  | 0     | -40  | H0 |
| HETATM16003 | HAJ H8U B 401 | -57.083 | 12.762 | 25.341 | 1.00 | 42.76 |      | H0 |
| ANISOU16003 | HAJ H8U B 401 | 6580    | 5010   | 4660   | 920  | 20    | 30   | H0 |
| HETATM16004 | HAI H8U B 401 | -56.502 | 11.210 | 24.807 | 1.00 | 40.71 |      | H0 |
| ANISOU16004 | HAI H8U B 401 | 6050    | 4950   | 4470   | 710  | -20   | 30   | H0 |
| HETATM16005 | HBM H8U B 401 | -61.306 | 10.130 | 23.313 | 1.00 | 43.61 |      | H0 |
| ANISOU16005 | HBM H8U B 401 | 5780    | 5980   | 4810   | 1340 | -40   | 110  | H0 |
| HETATM16006 | HBN H8U B 401 | -61.349 | 11.715 | 24.093 | 1.00 | 45.21 |      | H0 |
| ANISOU16006 | HBN H8U B 401 | 6280    | 5950   | 4950   | 1530 | 20    | 120  | H0 |
| HETATM16007 | HBO H8U B 401 | -61.156 | 10.236 | 25.071 | 1.00 | 43.47 |      | H0 |
| ANISOU16007 | HBO H8U B 401 | 5850    | 5870   | 4800   | 1340 | 60    | 40   | H0 |
| HETATM16008 | HBQ H8U B 401 | -59.160 | 9.312  | 22.389 | 1.00 | 41.16 |      | H0 |
| ANISOU16008 | HBQ H8U B 401 | 5540    | 5570   | 4530   | 950  | -90   | 110  | H0 |
| HETATM16009 | HBR H8U B 401 | -59.396 | 8.637  | 24.003 | 1.00 | 40.54 |      | H0 |
| ANISOU16009 | HBR H8U B 401 | 5370    | 5530   | 4500   | 920  | -30   | 30   | H0 |
| HETATM16010 | HBP H8U B 401 | -57.831 | 9.314  | 23.559 | 1.00 | 40.15 |      | H0 |

|             |               |         |         |        |       |        |       |    |
|-------------|---------------|---------|---------|--------|-------|--------|-------|----|
| ANISOU16010 | HBP H8U B 401 | 5540    | 5270    | 4440   | 770   | -50    | 50    | H0 |
| HETATM16011 | HAD H8U B 401 | -59.577 | 12.850  | 23.446 | 1.00  | 44.14  |       | H0 |
| ANISOU16011 | HAD H8U B 401 | 6520    | 5480    | 4770   | 1360  | -10    | 160   | H0 |
| HETATM16012 | HAB H8U B 401 | -59.314 | 10.977  | 21.175 | 1.00  | 41.68  |       | H0 |
| ANISOU16012 | HAB H8U B 401 | 5850    | 5490    | 4500   | 1140  | -120   | 210   | H0 |
| HETATM16013 | HAC H8U B 401 | -60.180 | 12.520  | 21.342 | 1.00  | 43.98  |       | H0 |
| ANISOU16013 | HAC H8U B 401 | 6330    | 5650    | 4720   | 1440  | -90    | 260   | H0 |
| HETATM16014 | HAU H8U B 401 | -56.975 | 15.742  | 23.439 | 1.00  | 45.40  |       | H0 |
| ANISOU16014 | HAU H8U B 401 | 7480    | 4910    | 4860   | 1120  | 10     | 200   | H0 |
| HETATM16015 | HAV H8U B 401 | -56.067 | 14.587  | 24.412 | 1.00  | 43.37  |       | H0 |
| ANISOU16015 | HAV H8U B 401 | 7060    | 4740    | 4680   | 860   | 0      | 110   | H0 |
| HETATM16016 | HAT H8U B 401 | -57.784 | 14.869  | 24.739 | 1.00  | 44.57  |       | H0 |
| ANISOU16016 | HAT H8U B 401 | 7180    | 4980    | 4780   | 1210  | 40     | 110   | H0 |
| HETATM16017 | HAF H8U B 401 | -55.559 | 11.883  | 22.590 | 1.00  | 40.48  |       | H0 |
| ANISOU16017 | HAF H8U B 401 | 6140    | 4830    | 4410   | 620   | -60    | 150   | H0 |
| HETATM16018 | HAE H8U B 401 | -56.590 | 10.458  | 22.580 | 1.00  | 39.40  |       | H0 |
| ANISOU16018 | HAE H8U B 401 | 5700    | 4960    | 4310   | 680   | -70    | 120   | H0 |
| HETATM16019 | HAL H8U B 401 | -55.259 | 13.084  | 20.704 | 1.00  | 41.62  |       | H0 |
| ANISOU16019 | HAL H8U B 401 | 6490    | 4840    | 4480   | 660   | -70    | 290   | H0 |
| HETATM16020 | HAK H8U B 401 | -55.287 | 11.634  | 19.681 | 1.00  | 40.16  |       | H0 |
| ANISOU16020 | HAK H8U B 401 | 6040    | 4910    | 4310   | 590   | -100   | 300   | H0 |
| HETATM16021 | HAN H8U B 401 | -56.411 | 14.246  | 19.096 | 1.00  | 43.73  |       | H0 |
| ANISOU16021 | HAN H8U B 401 | 6920    | 5080    | 4620   | 960   | -90    | 430   | H0 |
| HETATM16022 | HAM H8U B 401 | -56.452 | 12.781  | 18.072 | 1.00  | 42.29  |       | H0 |
| ANISOU16022 | HAM H8U B 401 | 6450    | 5160    | 4450   | 890   | -130   | 430   | H0 |
| HETATM16023 | HAQ H8U B 401 | -59.591 | 13.859  | 18.056 | 1.00  | 44.97  |       | H0 |
| ANISOU16023 | HAQ H8U B 401 | 6760    | 5650    | 4680   | 1520  | -190   | 480   | H0 |
| HETATM16024 | HAR H8U B 401 | -58.435 | 15.019  | 18.739 | 1.00  | 45.44  |       | H0 |
| ANISOU16024 | HAR H8U B 401 | 7150    | 5370    | 4740   | 1410  | -120   | 490   | H0 |
| HETATM16025 | HAS H8U B 401 | -59.756 | 14.388  | 19.738 | 1.00  | 45.24  |       | H0 |
| ANISOU16025 | HAS H8U B 401 | 6890    | 5550    | 4760   | 1580  | -120   | 410   | H0 |
| HETATM16026 | HBS H8U B 401 | -57.198 | 10.932  | 20.574 | 1.00  | 40.30  |       | H0 |
| ANISOU16026 | HBS H8U B 401 | 5830    | 5140    | 4350   | 830   | -120   | 230   | H0 |
| HETATM16027 | C1 NAG B 402  | -65.066 | -17.964 | -6.786 | 1.00  | 90.94  |       | C0 |
| ANISOU16027 | C1 NAG B 402  | 13760   | 13320   | 7480   | -1910 | -3370  | -2760 | C0 |
| HETATM16028 | C2 NAG B 402  | -66.323 | -17.224 | -7.236 | 1.00  | 93.88  |       | C0 |
| ANISOU16028 | C2 NAG B 402  | 13840   | 14030   | 7800   | -1950 | -3680  | -2740 | C0 |
| HETATM16029 | C3 NAG B 402  | -67.306 | -18.204 | -7.872 | 1.00  | 98.35  |       | C0 |
| ANISOU16029 | C3 NAG B 402  | 14480   | 14640   | 8240   | -2260 | -3990  | -2970 | C0 |
| HETATM16030 | C4 NAG B 402  | -66.620 | -18.999 | -8.980 | 1.00  | 100.17 |       | C0 |
| ANISOU16030 | C4 NAG B 402  | 15220   | 14680   | 8160   | -2230 | -4000  | -3140 | C0 |
| HETATM16031 | C5 NAG B 402  | -65.305 | -19.614 | -8.494 | 1.00  | 97.95  |       | C0 |
| ANISOU16031 | C5 NAG B 402  | 15230   | 14050   | 7930   | -2130 | -3660  | -3140 | C0 |
| HETATM16032 | C6 NAG B 402  | -64.542 | -20.252 | -9.654 | 1.00  | 100.01 |       | C0 |
| ANISOU16032 | C6 NAG B 402  | 16010   | 14130   | 7860   | -2030 | -3630  | -3290 | C0 |
| HETATM16033 | C7 NAG B 402  | -67.353 | -15.247 | -6.167 | 1.00  | 92.83  |       | C0 |
| ANISOU16033 | C7 NAG B 402  | 12990   | 14310   | 7980   | -1790 | -3710  | -2430 | C0 |
| HETATM16034 | C8 NAG B 402  | -67.912 | -14.649 | -4.907 | 1.00  | 90.87  |       | C0 |
| ANISOU16034 | C8 NAG B 402  | 12310   | 14170   | 8040   | -1810 | -3650  | -2280 | C0 |
| HETATM16035 | N2 NAG B 402  | -66.902 | -16.511 | -6.100 | 1.00  | 92.72  |       | N0 |
| ANISOU16035 | N2 NAG B 402  | 13250   | 14030   | 7950   | -1970 | -3640  | -2580 | N0 |
| HETATM16036 | O3 NAG B 402  | -68.409 | -17.509 | -8.408 | 1.00  | 100.97 |       | O0 |
| ANISOU16036 | O3 NAG B 402  | 14550   | 15320   | 8500   | -2270 | -4290  | -2950 | O0 |
| HETATM16037 | O4 NAG B 402  | -67.483 | -20.023 | -9.416 | 1.00  | 104.02 |       | O0 |

|             |     |     |   |     |         |         |         |       |        |       |    |
|-------------|-----|-----|---|-----|---------|---------|---------|-------|--------|-------|----|
| ANISOU16037 | O4  | NAG | B | 402 | 15810   | 15160   | 8550    | -2560 | -4270  | -3370 | O0 |
| HETATM16038 | O5  | NAG | B | 402 | -64.479 | -18.641 | -7.876  | 1.00  | 93.53  |       | O0 |
| ANISOU16038 | O5  | NAG | B | 402 | 14530   | 13500   | 7510    | -1860 | -3380  | -2910 | O0 |
| HETATM16039 | O6  | NAG | B | 402 | -63.372 | -20.873 | -9.164  | 1.00  | 98.20  |       | O0 |
| ANISOU16039 | O6  | NAG | B | 402 | 16020   | 13600   | 7690    | -1940 | -3320  | -3290 | O0 |
| HETATM16040 | O7  | NAG | B | 402 | -67.340 | -14.564 | -7.195  | 1.00  | 94.65  |       | O0 |
| ANISOU16040 | O7  | NAG | B | 402 | 13310   | 14680   | 7970    | -1590 | -3820  | -2390 | O0 |
| HETATM16041 | H1  | NAG | B | 402 | -65.353 | -18.698 | -6.032  | 1.00  | 91.28  |       | H0 |
| ANISOU16041 | H1  | NAG | B | 402 | 13740   | 13250   | 7700    | -2130 | -3360  | -2820 | H0 |
| HETATM16042 | H2  | NAG | B | 402 | -66.035 | -16.510 | -8.007  | 1.00  | 93.99  |       | H0 |
| ANISOU16042 | H2  | NAG | B | 402 | 13940   | 14140   | 7630    | -1720 | -3690  | -2680 | H0 |
| HETATM16043 | H3  | NAG | B | 402 | -67.651 | -18.892 | -7.100  | 1.00  | 98.41  |       | H0 |
| ANISOU16043 | H3  | NAG | B | 402 | 14390   | 14560   | 8440    | -2510 | -3980  | -3020 | H0 |
| HETATM16044 | H4  | NAG | B | 402 | -66.411 | -18.322 | -9.809  | 1.00  | 100.65 |       | H0 |
| ANISOU16044 | H4  | NAG | B | 402 | 15370   | 14860   | 8010    | -2010 | -4040  | -3090 | H0 |
| HETATM16045 | H5  | NAG | B | 402 | -65.539 | -20.392 | -7.768  | 1.00  | 98.01  |       | H0 |
| ANISOU16045 | H5  | NAG | B | 402 | 15200   | 13920   | 8110    | -2360 | -3640  | -3210 | H0 |
| HETATM16046 | H61 | NAG | B | 402 | -64.297 | -19.488 | -10.392 | 1.00  | 100.06 |       | H0 |
| ANISOU16046 | H61 | NAG | B | 402 | 16060   | 14280   | 7690    | -1800 | -3640  | -3220 | H0 |
| HETATM16047 | H62 | NAG | B | 402 | -65.168 | -20.999 | -10.141 | 1.00  | 103.04 |       | H0 |
| ANISOU16047 | H62 | NAG | B | 402 | 16520   | 14500   | 8130    | -2250 | -3850  | -3470 | H0 |
| HETATM16048 | H81 | NAG | B | 402 | -67.845 | -15.362 | -4.086  | 1.00  | 90.09  |       | H0 |
| ANISOU16048 | H81 | NAG | B | 402 | 12190   | 13930   | 8110    | -1990 | -3550  | -2320 | H0 |
| HETATM16049 | H82 | NAG | B | 402 | -68.956 | -14.376 | -5.066  | 1.00  | 92.75  |       | H0 |
| ANISOU16049 | H82 | NAG | B | 402 | 12310   | 14650   | 8280    | -1880 | -3870  | -2290 | H0 |
| HETATM16050 | H83 | NAG | B | 402 | -67.340 | -13.760 | -4.642  | 1.00  | 88.57  |       | H0 |
| ANISOU16050 | H83 | NAG | B | 402 | 11990   | 13870   | 7790    | -1580 | -3490  | -2130 | H0 |
| HETATM16051 | HN2 | NAG | B | 402 | -66.943 | -17.007 | -5.221  | 1.00  | 91.76  |       | H0 |
| ANISOU16051 | HN2 | NAG | B | 402 | 13040   | 13800   | 8030    | -2120 | -3550  | -2590 | H0 |
| HETATM16052 | OAV | H8U | C | 401 | -29.998 | 29.865  | 22.996  | 1.00  | 57.93  |       | O0 |
| ANISOU16052 | OAV | H8U | C | 401 | 7710    | 7200    | 7100    | -2320 | 1040   | 170   | O0 |
| HETATM16053 | CAP | H8U | C | 401 | -30.795 | 29.167  | 23.617  | 1.00  | 57.04  |       | C0 |
| ANISOU16053 | CAP | H8U | C | 401 | 7560    | 7050    | 7060    | -2090 | 1020   | 110   | C0 |
| HETATM16054 | NAO | H8U | C | 401 | -31.178 | 29.458  | 24.847  | 1.00  | 57.43  |       | N0 |
| ANISOU16054 | NAO | H8U | C | 401 | 7680    | 6930    | 7210    | -2000 | 1000   | 30    | N0 |
| HETATM16055 | CAN | H8U | C | 401 | -31.972 | 28.491  | 25.275  | 1.00  | 56.66  |       | C0 |
| ANISOU16055 | CAN | H8U | C | 401 | 7500    | 6860    | 7160    | -1770 | 990    | -30   | C0 |
| HETATM16056 | CBA | H8U | C | 401 | -32.471 | 28.328  | 26.516  | 1.00  | 57.48  |       | C0 |
| ANISOU16056 | CBA | H8U | C | 401 | 7620    | 6880    | 7340    | -1640 | 970    | -130  | C0 |
| HETATM16057 | OBF | H8U | C | 401 | -32.149 | 29.343  | 27.369  | 1.00  | 60.10  |       | O0 |
| ANISOU16057 | OBF | H8U | C | 401 | 8080    | 7050    | 7710    | -1750 | 970    | -170  | O0 |
| HETATM16058 | CBE | H8U | C | 401 | -32.179 | 29.162  | 28.724  | 1.00  | 60.17  |       | C0 |
| ANISOU16058 | CBE | H8U | C | 401 | 8070    | 7030    | 7760    | -1680 | 970    | -300  | C0 |
| HETATM16059 | CBD | H8U | C | 401 | -32.585 | 28.096  | 29.525  | 1.00  | 59.21  |       | C0 |
| ANISOU16059 | CBD | H8U | C | 401 | 7840    | 7000    | 7660    | -1510 | 960    | -390  | C0 |
| HETATM16060 | CBC | H8U | C | 401 | -33.114 | 26.848  | 29.192  | 1.00  | 58.29  |       | C0 |
| ANISOU16060 | CBC | H8U | C | 401 | 7600    | 7020    | 7530    | -1350 | 950    | -380  | C0 |
| HETATM16061 | CBG | H8U | C | 401 | -34.095 | 26.470  | 30.315  | 1.00  | 57.45  |       | C0 |
| ANISOU16061 | CBG | H8U | C | 401 | 7510    | 6830    | 7480    | -1180 | 940    | -450  | C0 |
| HETATM16062 | CBH | H8U | C | 401 | -32.006 | 25.787  | 29.130  | 1.00  | 57.39  |       | C0 |
| ANISOU16062 | CBH | H8U | C | 401 | 7300    | 7160    | 7340    | -1410 | 950    | -450  | C0 |
| HETATM16063 | OBB | H8U | C | 401 | -33.862 | 26.865  | 27.952  | 1.00  | 57.59  |       | O0 |
| ANISOU16063 | OBB | H8U | C | 401 | 7540    | 6900    | 7440    | -1290 | 950    | -260  | O0 |
| HETATM16064 | CAZ | H8U | C | 401 | -33.238 | 27.218  | 26.793  | 1.00  | 55.93  |       | C0 |



|                           |         |        |        |       |       |      |    |
|---------------------------|---------|--------|--------|-------|-------|------|----|
| ANISOU16064 CAZ H8U C 401 | 7330    | 6750   | 7170   | -1430 | 960   | -170 | C0 |
| HETATM16065 CAY H8U C 401 | -33.457 | 26.301 | 25.771 | 1.00  | 54.44 |      | C0 |
| ANISOU16065 CAY H8U C 401 | 7040    | 6710   | 6930   | -1370 | 950   | -120 | C0 |
| HETATM16066 CAX H8U C 401 | -32.895 | 26.512 | 24.513 | 1.00  | 54.25 |      | C0 |
| ANISOU16066 CAX H8U C 401 | 7000    | 6780   | 6830   | -1500 | 970   | -30  | C0 |
| HETATM16067 CAM H8U C 401 | -32.162 | 27.602 | 24.269 | 1.00  | 54.87 |      | C0 |
| ANISOU16067 CAM H8U C 401 | 7170    | 6800   | 6880   | -1700 | 990   | 20   | C0 |
| HETATM16068 CAH H8U C 401 | -31.473 | 28.044 | 23.113 | 1.00  | 55.16 |      | C0 |
| ANISOU16068 CAH H8U C 401 | 7210    | 6930   | 6820   | -1890 | 1010  | 110  | C0 |
| HETATM16069 CAI H8U C 401 | -30.467 | 26.995 | 22.620 | 1.00  | 54.43 |      | C0 |
| ANISOU16069 CAI H8U C 401 | 6900    | 7150   | 6630   | -1940 | 1040  | 40   | C0 |
| HETATM16070 CAG H8U C 401 | -32.371 | 28.430 | 21.851 | 1.00  | 54.91 |      | C0 |
| ANISOU16070 CAG H8U C 401 | 7290    | 6800   | 6780   | -1860 | 990   | 280  | C0 |
| HETATM16071 CBI H8U C 401 | -32.983 | 29.833 | 21.957 | 1.00  | 56.50 |      | C0 |
| ANISOU16071 CBI H8U C 401 | 7730    | 6690   | 7050   | -1890 | 950   | 380  | C0 |
| HETATM16072 CBJ H8U C 401 | -33.537 | 27.468 | 21.602 | 1.00  | 53.17 |      | C0 |
| ANISOU16072 CBJ H8U C 401 | 7010    | 6600   | 6590   | -1610 | 960   | 290  | C0 |
| HETATM16073 CAC H8U C 401 | -31.254 | 28.447 | 20.766 | 1.00  | 56.08 |      | C0 |
| ANISOU16073 CAC H8U C 401 | 7360    | 7160   | 6790   | -2080 | 1030  | 320  | C0 |
| HETATM16074 CAB H8U C 401 | -31.599 | 28.504 | 19.244 | 1.00  | 56.51 |      | C0 |
| ANISOU16074 CAB H8U C 401 | 7450    | 7260   | 6760   | -2120 | 1020  | 470  | C0 |
| HETATM16075 CAA H8U C 401 | -30.632 | 27.528 | 18.554 | 1.00  | 56.37 |      | C0 |
| ANISOU16075 CAA H8U C 401 | 7220    | 7590   | 6610   | -2190 | 1070  | 410  | C0 |
| HETATM16076 CAR H8U C 401 | -29.305 | 27.666 | 19.065 | 1.00  | 57.26 |      | C0 |
| ANISOU16076 CAR H8U C 401 | 7230    | 7850   | 6680   | -2370 | 1120  | 310  | C0 |
| HETATM16077 OAU H8U C 401 | -28.333 | 27.922 | 18.356 | 1.00  | 59.25 |      | O0 |
| ANISOU16077 OAU H8U C 401 | 7430    | 8280   | 6810   | -2580 | 1160  | 340  | O0 |
| HETATM16078 NAS H8U C 401 | -29.152 | 27.486 | 20.391 | 1.00  | 56.38 |      | N0 |
| ANISOU16078 NAS H8U C 401 | 7090    | 7680   | 6650   | -2290 | 1110  | 190  | N0 |
| HETATM16079 CAT H8U C 401 | -27.850 | 27.616 | 21.088 | 1.00  | 57.24 |      | C0 |
| ANISOU16079 CAT H8U C 401 | 7090    | 7930   | 6720   | -2460 | 1140  | 80   | C0 |
| HETATM16080 CAD H8U C 401 | -30.437 | 27.190 | 21.052 | 1.00  | 55.11 |      | C0 |
| ANISOU16080 CAD H8U C 401 | 7000    | 7320   | 6620   | -2040 | 1060  | 180  | C0 |
| HETATM16081 CAE H8U C 401 | -30.955 | 25.916 | 20.304 | 1.00  | 53.53 |      | C0 |
| ANISOU16081 CAE H8U C 401 | 6680    | 7280   | 6380   | -1870 | 1050  | 170  | C0 |
| HETATM16082 NAF H8U C 401 | -31.138 | 26.190 | 18.857 | 1.00  | 54.55 |      | N0 |
| ANISOU16082 NAF H8U C 401 | 6850    | 7450   | 6420   | -1950 | 1060  | 310  | N0 |
| HETATM16083 CAJ H8U C 401 | -30.414 | 25.301 | 17.917 | 1.00  | 54.54 |      | C0 |
| ANISOU16083 CAJ H8U C 401 | 6680    | 7750   | 6290   | -1990 | 1090  | 270  | C0 |
| HETATM16084 CAK H8U C 401 | -30.148 | 26.151 | 16.666 | 1.00  | 56.31 |      | C0 |
| ANISOU16084 CAK H8U C 401 | 6980    | 8010   | 6400   | -2200 | 1120  | 420  | C0 |
| HETATM16085 CAL H8U C 401 | -30.736 | 27.521 | 17.004 | 1.00  | 57.29 |      | C0 |
| ANISOU16085 CAL H8U C 401 | 7340    | 7810   | 6610   | -2270 | 1080  | 540  | C0 |
| HETATM16086 CAQ H8U C 401 | -29.974 | 28.658 | 16.297 | 1.00  | 59.47 |      | C0 |
| ANISOU16086 CAQ H8U C 401 | 7720    | 8090   | 6780   | -2560 | 1110  | 660  | C0 |
| HETATM16087 OAW H8U C 401 | -32.115 | 27.551 | 16.603 | 1.00  | 57.12 |      | O0 |
| ANISOU16087 OAW H8U C 401 | 7440    | 7620   | 6650   | -2090 | 1020  | 650  | O0 |
| HETATM16088 HAO H8U C 401 | -30.800 | 30.190 | 25.412 | 1.00  | 58.40 |      | H0 |
| ANISOU16088 HAO H8U C 401 | 7890    | 6950   | 7340   | -2110 | 1000  | 0    | H0 |
| HETATM16089 HBE H8U C 401 | -31.807 | 30.017 | 29.288 | 1.00  | 61.32 |      | H0 |
| ANISOU16089 HBE H8U C 401 | 8320    | 7060   | 7920   | -1790 | 970   | -330 | H0 |
| HETATM16090 HBD H8U C 401 | -32.473 | 28.276 | 30.595 | 1.00  | 59.25 |      | H0 |
| ANISOU16090 HBD H8U C 401 | 7870    | 6950   | 7690   | -1520 | 960   | -480 | H0 |
| HETATM16091 HBG H8U C 401 | -33.545 | 26.089 | 31.178 | 1.00  | 57.07 |      | H0 |

|             |               |         |        |        |       |       |      |    |
|-------------|---------------|---------|--------|--------|-------|-------|------|----|
| ANISOU16091 | HBG H8U C 401 | 7400    | 6860   | 7420   | -1210 | 940   | -550 | H0 |
| HETATM16092 | HBH H8U C 401 | -34.783 | 25.705 | 29.961 | 1.00  | 56.37 |      | H0 |
| ANISOU16092 | HBH H8U C 401 | 7320    | 6750   | 7350   | -1060 | 930   | -420 | H0 |
| HETATM16093 | HBI H8U C 401 | -34.667 | 27.350 | 30.616 | 1.00  | 58.13 |      | H0 |
| ANISOU16093 | HBI H8U C 401 | 7720    | 6740   | 7620   | -1160 | 950   | -440 | H0 |
| HETATM16094 | HBJ H8U C 401 | -31.201 | 26.141 | 28.487 | 1.00  | 58.37 |      | H0 |
| ANISOU16094 | HBJ H8U C 401 | 7410    | 7360   | 7410   | -1550 | 970   | -420 | H0 |
| HETATM16095 | HBK H8U C 401 | -32.413 | 24.859 | 28.728 | 1.00  | 56.44 |      | H0 |
| ANISOU16095 | HBK H8U C 401 | 7110    | 7130   | 7210   | -1290 | 940   | -430 | H0 |
| HETATM16096 | HBL H8U C 401 | -31.609 | 25.608 | 30.129 | 1.00  | 57.29 |      | H0 |
| ANISOU16096 | HBL H8U C 401 | 7260    | 7180   | 7330   | -1420 | 940   | -540 | H0 |
| HETATM16097 | HAY H8U C 401 | -34.057 | 25.420 | 25.950 | 1.00  | 53.04 |      | H0 |
| ANISOU16097 | HAY H8U C 401 | 6800    | 6580   | 6770   | -1220 | 940   | -140 | H0 |
| HETATM16098 | HAX H8U C 401 | -33.073 | 25.783 | 23.730 | 1.00  | 53.72 |      | H0 |
| ANISOU16098 | HAX H8U C 401 | 6850    | 6830   | 6720   | -1440 | 970   | 0    | H0 |
| HETATM16099 | HAJ H8U C 401 | -29.476 | 27.177 | 22.879 | 1.00  | 55.17 |      | H0 |
| ANISOU16099 | HAJ H8U C 401 | 6940    | 7350   | 6680   | -2090 | 1060  | -10  | H0 |
| HETATM16100 | HAI H8U C 401 | -30.762 | 25.973 | 22.695 | 1.00  | 53.10 |      | H0 |
| ANISOU16100 | HAI H8U C 401 | 6630    | 7080   | 6460   | -1790 | 1030  | -10  | H0 |
| HETATM16101 | HBM H8U C 401 | -33.753 | 29.940 | 21.199 | 1.00  | 56.62 |      | H0 |
| ANISOU16101 | HBM H8U C 401 | 7810    | 6640   | 7060   | -1820 | 920   | 480  | H0 |
| HETATM16102 | HBN H8U C 401 | -32.228 | 30.605 | 21.804 | 1.00  | 57.95 |      | H0 |
| ANISOU16102 | HBN H8U C 401 | 7990    | 6840   | 7190   | -2090 | 970   | 410  | H0 |
| HETATM16103 | HBO H8U C 401 | -33.434 | 29.951 | 22.941 | 1.00  | 55.97 |      | H0 |
| ANISOU16103 | HBO H8U C 401 | 7710    | 6490   | 7070   | -1780 | 940   | 310  | H0 |
| HETATM16104 | HBQ H8U C 401 | -33.921 | 27.590 | 20.593 | 1.00  | 53.68 |      | H0 |
| ANISOU16104 | HBQ H8U C 401 | 7120    | 6660   | 6620   | -1620 | 950   | 400  | H0 |
| HETATM16105 | HBR H8U C 401 | -34.336 | 27.697 | 22.307 | 1.00  | 52.83 |      | H0 |
| ANISOU16105 | HBR H8U C 401 | 7040    | 6390   | 6640   | -1490 | 930   | 270  | H0 |
| HETATM16106 | HBP H8U C 401 | -33.234 | 26.442 | 21.748 | 1.00  | 52.13 |      | H0 |
| ANISOU16106 | HBP H8U C 401 | 6730    | 6640   | 6430   | -1560 | 970   | 200  | H0 |
| HETATM16107 | HAD H8U C 401 | -30.621 | 29.309 | 20.939 | 1.00  | 57.45 |      | H0 |
| ANISOU16107 | HAD H8U C 401 | 7610    | 7270   | 6940   | -2260 | 1040  | 340  | H0 |
| HETATM16108 | HAB H8U C 401 | -32.633 | 28.225 | 19.061 | 1.00  | 55.76 |      | H0 |
| ANISOU16108 | HAB H8U C 401 | 7390    | 7080   | 6710   | -1940 | 990   | 510  | H0 |
| HETATM16109 | HAC H8U C 401 | -31.425 | 29.513 | 18.870 | 1.00  | 58.19 |      | H0 |
| ANISOU16109 | HAC H8U C 401 | 7800    | 7360   | 6940   | -2280 | 1020  | 570  | H0 |
| HETATM16110 | HAU H8U C 401 | -27.043 | 27.809 | 20.383 | 1.00  | 58.50 |      | H0 |
| ANISOU16110 | HAU H8U C 401 | 7190    | 8260   | 6780   | -2640 | 1180  | 100  | H0 |
| HETATM16111 | HAV H8U C 401 | -27.615 | 26.699 | 21.628 | 1.00  | 56.08 |      | H0 |
| ANISOU16111 | HAV H8U C 401 | 6800    | 7920   | 6590   | -2340 | 1130  | -40  | H0 |
| HETATM16112 | HAT H8U C 401 | -27.881 | 28.441 | 21.799 | 1.00  | 57.77 |      | H0 |
| ANISOU16112 | HAT H8U C 401 | 7280    | 7820   | 6850   | -2530 | 1120  | 80   | H0 |
| HETATM16113 | HAF H8U C 401 | -30.219 | 25.124 | 20.429 | 1.00  | 53.19 |      | H0 |
| ANISOU16113 | HAF H8U C 401 | 6480    | 7440   | 6290   | -1860 | 1070  | 70   | H0 |
| HETATM16114 | HAE H8U C 401 | -31.895 | 25.571 | 20.709 | 1.00  | 52.44 |      | H0 |
| ANISOU16114 | HAE H8U C 401 | 6580    | 7030   | 6320   | -1690 | 1020  | 170  | H0 |
| HETATM16115 | HAL H8U C 401 | -29.481 | 24.954 | 18.338 | 1.00  | 54.66 |      | H0 |
| ANISOU16115 | HAL H8U C 401 | 6570    | 7920   | 6280   | -2040 | 1120  | 160  | H0 |
| HETATM16116 | HAK H8U C 401 | -31.041 | 24.446 | 17.658 | 1.00  | 53.41 |      | H0 |
| ANISOU16116 | HAK H8U C 401 | 6490    | 7650   | 6160   | -1830 | 1070  | 260  | H0 |
| HETATM16117 | HAN H8U C 401 | -29.076 | 26.210 | 16.478 | 1.00  | 57.35 |      | H0 |
| ANISOU16117 | HAN H8U C 401 | 7020    | 8320   | 6450   | -2360 | 1170  | 380  | H0 |
| HETATM16118 | HAM H8U C 401 | -30.659 | 25.722 | 15.804 | 1.00  | 56.12 |      | H0 |

|             |               |         |        |        |       |       |      |    |
|-------------|---------------|---------|--------|--------|-------|-------|------|----|
| ANISOU16118 | HAM H8U C 401 | 6950    | 8040   | 6330   | -2130 | 1110  | 470  | H0 |
| HETATM16119 | HAQ H8U C 401 | -30.555 | 28.993 | 15.437 | 1.00  | 60.17 |      | H0 |
| ANISOU16119 | HAQ H8U C 401 | 7920    | 8110   | 6840   | -2570 | 1080  | 790  | H0 |
| HETATM16120 | HAR H8U C 401 | -29.000 | 28.316 | 15.949 | 1.00  | 60.09 |      | H0 |
| ANISOU16120 | HAR H8U C 401 | 7660    | 8420   | 6760   | -2690 | 1160  | 600  | H0 |
| HETATM16121 | HAS H8U C 401 | -29.843 | 29.495 | 16.976 | 1.00  | 60.24 |      | H0 |
| ANISOU16121 | HAS H8U C 401 | 7930    | 8020   | 6940   | -2650 | 1100  | 660  | H0 |
| HETATM16122 | HBS H8U C 401 | -32.114 | 26.133 | 18.647 | 1.00  | 53.94 |      | H0 |
| ANISOU16122 | HBS H8U C 401 | 6850    | 7260   | 6390   | -1830 | 1020  | 370  | H0 |
| HETATM16123 | C1 NAG C 402  | -67.106 | 22.193 | -1.982 | 1.00  | 85.02 |      | C0 |
| ANISOU16123 | C1 NAG C 402  | 9550    | 13250  | 9500   | 1210  | -1940 | 3150 | C0 |
| HETATM16124 | C2 NAG C 402  | -67.161 | 23.666 | -2.384 | 1.00  | 88.03 |      | C0 |
| ANISOU16124 | C2 NAG C 402  | 10080   | 13430  | 9930   | 1410  | -2060 | 3330 | C0 |
| HETATM16125 | C3 NAG C 402  | -68.577 | 24.116 | -2.740 | 1.00  | 91.02 |      | C0 |
| ANISOU16125 | C3 NAG C 402  | 10300   | 13960  | 10330  | 1640  | -2260 | 3430 | C0 |
| HETATM16126 | C4 NAG C 402  | -69.298 | 23.101 | -3.623 | 1.00  | 91.63 |      | C0 |
| ANISOU16126 | C4 NAG C 402  | 10210   | 14370  | 10240  | 1510  | -2350 | 3460 | C0 |
| HETATM16127 | C5 NAG C 402  | -69.126 | 21.682 | -3.082 | 1.00  | 89.20 |      | C0 |
| ANISOU16127 | C5 NAG C 402  | 9770    | 14230  | 9890   | 1290  | -2200 | 3260 | C0 |
| HETATM16128 | C6 NAG C 402  | -69.774 | 20.631 | -3.981 | 1.00  | 89.92 |      | C0 |
| ANISOU16128 | C6 NAG C 402  | 9730    | 14630  | 9810   | 1130  | -2290 | 3280 | C0 |
| HETATM16129 | C7 NAG C 402  | -65.982 | 25.612 | -1.449 | 1.00  | 89.39 |      | C0 |
| ANISOU16129 | C7 NAG C 402  | 10580   | 13060  | 10320  | 1600  | -1990 | 3380 | C0 |
| HETATM16130 | C8 NAG C 402  | -65.506 | 26.302 | -0.199 | 1.00  | 88.89 |      | C0 |
| ANISOU16130 | C8 NAG C 402  | 10590   | 12740  | 10440  | 1710  | -1870 | 3280 | C0 |
| HETATM16131 | N2 NAG C 402  | -66.639 | 24.460 | -1.282 | 1.00  | 87.94 |      | N0 |
| ANISOU16131 | N2 NAG C 402  | 10160   | 13150  | 10100  | 1540  | -1960 | 3270 | N0 |
| HETATM16132 | O3 NAG C 402  | -68.529 | 25.352 | -3.419 | 1.00  | 93.75 |      | O0 |
| ANISOU16132 | O3 NAG C 402  | 10830   | 14120  | 10670  | 1780  | -2390 | 3630 | O0 |
| HETATM16133 | O4 NAG C 402  | -70.664 | 23.440 | -3.663 | 1.00  | 93.90 |      | O0 |
| ANISOU16133 | O4 NAG C 402  | 10290   | 14830  | 10560  | 1740  | -2500 | 3510 | O0 |
| HETATM16134 | O5 NAG C 402  | -67.745 | 21.406 | -2.964 | 1.00  | 86.30 |      | O0 |
| ANISOU16134 | O5 NAG C 402  | 9600    | 13680  | 9500   | 1100  | -2050 | 3200 | O0 |
| HETATM16135 | O6 NAG C 402  | -68.911 | 20.291 | -5.045 | 1.00  | 89.68 |      | O0 |
| ANISOU16135 | O6 NAG C 402  | 9890    | 14570  | 9610   | 910   | -2290 | 3340 | O0 |
| HETATM16136 | O7 NAG C 402  | -65.760 | 26.120 | -2.551 | 1.00  | 91.08 |      | O0 |
| ANISOU16136 | O7 NAG C 402  | 10960   | 13220  | 10430  | 1550  | -2090 | 3560 | O0 |
| HETATM16137 | H1 NAG C 402  | -67.638 | 22.080 | -1.039 | 1.00  | 84.94 |      | H0 |
| ANISOU16137 | H1 NAG C 402  | 9380    | 13280  | 9600   | 1320  | -1900 | 3050 | H0 |
| HETATM16138 | H2 NAG C 402  | -66.521 | 23.800 | -3.256 | 1.00  | 88.25 |      | H0 |
| ANISOU16138 | H2 NAG C 402  | 10280   | 13400  | 9850   | 1280  | -2090 | 3430 | H0 |
| HETATM16139 | H3 NAG C 402  | -69.143 | 24.231 | -1.815 | 1.00  | 91.11 |      | H0 |
| ANISOU16139 | H3 NAG C 402  | 10160   | 13990  | 10470  | 1800  | -2230 | 3340 | H0 |
| HETATM16140 | H4 NAG C 402  | -68.879 | 23.163 | -4.628 | 1.00  | 92.11 |      | H0 |
| ANISOU16140 | H4 NAG C 402  | 10420   | 14410  | 10160  | 1390  | -2400 | 3570 | H0 |
| HETATM16141 | H5 NAG C 402  | -69.614 | 21.632 | -2.109 | 1.00  | 88.90 |      | H0 |
| ANISOU16141 | H5 NAG C 402  | 9580    | 14220  | 9970   | 1400  | -2160 | 3160 | H0 |
| HETATM16142 | H61 NAG C 402 | -70.715 | 21.008 | -4.382 | 1.00  | 92.01 |      | H0 |
| ANISOU16142 | H61 NAG C 402 | 9880    | 15020  | 10060  | 1270  | -2440 | 3370 | H0 |
| HETATM16143 | H62 NAG C 402 | -69.996 | 19.743 | -3.394 | 1.00  | 88.66 |      | H0 |
| ANISOU16143 | H62 NAG C 402 | 9440    | 14590  | 9660   | 1040  | -2220 | 3140 | H0 |
| HETATM16144 | H81 NAG C 402 | -65.741 | 25.704 | 0.681  | 1.00  | 87.44 |      | H0 |
| ANISOU16144 | H81 NAG C 402 | 10250   | 12650  | 10330  | 1730  | -1780 | 3130 | H0 |
| HETATM16145 | H82 NAG C 402 | -65.986 | 27.277 | -0.116 | 1.00  | 90.76 |      | H0 |

|             |               |         |        |        |      |       |      |    |
|-------------|---------------|---------|--------|--------|------|-------|------|----|
| ANISOU16145 | H82 NAG C 402 | 10870   | 12850  | 10760  | 1930 | -1970 | 3360 | H0 |
| HETATM16146 | H83 NAG C 402 | -64.424 | 26.433 | -0.246 | 1.00 | 87.78 |      | H0 |
| ANISOU16146 | H83 NAG C 402 | 10630   | 12450  | 10280  | 1560 | -1790 | 3290 | H0 |
| HETATM16147 | HN2 NAG C 402 | -66.783 | 24.105 | -0.347 | 1.00 | 86.78 |      | H0 |
| ANISOU16147 | HN2 NAG C 402 | 9900    | 13040  | 10040  | 1570 | -1870 | 3130 | H0 |
| HETATM16148 | OAV H8U D 401 | -5.924  | 6.009  | 17.751 | 1.00 | 59.89 |      | O0 |
| ANISOU16148 | OAV H8U D 401 | 6580    | 8710   | 7470   | 760  | 1740  | -400 | O0 |
| HETATM16149 | CAP H8U D 401 | -6.703  | 6.606  | 18.500 | 1.00 | 58.84 |      | C0 |
| ANISOU16149 | CAP H8U D 401 | 6480    | 8530   | 7350   | 600  | 1620  | -390 | C0 |
| HETATM16150 | NAO H8U D 401 | -6.342  | 7.067  | 19.686 | 1.00 | 58.80 |      | N0 |
| ANISOU16150 | NAO H8U D 401 | 6290    | 8680   | 7370   | 570  | 1510  | -330 | N0 |
| HETATM16151 | CAN H8U D 401 | -7.404  | 7.614  | 20.271 | 1.00 | 58.40 |      | C0 |
| ANISOU16151 | CAN H8U D 401 | 6340    | 8540   | 7310   | 410  | 1400  | -340 | C0 |
| HETATM16152 | CBA H8U D 401 | -7.517  | 8.127  | 21.517 | 1.00 | 58.89 |      | C0 |
| ANISOU16152 | CBA H8U D 401 | 6300    | 8690   | 7380   | 340  | 1280  | -300 | C0 |
| HETATM16153 | OBF H8U D 401 | -6.360  | 8.118  | 22.233 | 1.00 | 61.27 |      | O0 |
| ANISOU16153 | OBF H8U D 401 | 6360    | 9220   | 7690   | 430  | 1250  | -250 | O0 |
| HETATM16154 | CBE H8U D 401 | -6.377  | 8.176  | 23.605 | 1.00 | 61.63 |      | C0 |
| ANISOU16154 | CBE H8U D 401 | 6320    | 9370   | 7730   | 430  | 1130  | -200 | C0 |
| HETATM16155 | CBD H8U D 401 | -7.405  | 8.312  | 24.538 | 1.00 | 60.80 |      | C0 |
| ANISOU16155 | CBD H8U D 401 | 6320    | 9180   | 7600   | 360  | 1020  | -190 | C0 |
| HETATM16156 | CBC H8U D 401 | -8.791  | 8.448  | 24.356 | 1.00 | 59.58 |      | C0 |
| ANISOU16156 | CBC H8U D 401 | 6380    | 8820   | 7440   | 250  | 1000  | -230 | C0 |
| HETATM16157 | CBG H8U D 401 | -9.383  | 9.242  | 25.534 | 1.00 | 58.43 |      | C0 |
| ANISOU16157 | CBG H8U D 401 | 6210    | 8730   | 7260   | 120  | 880   | -240 | C0 |
| HETATM16158 | CBH H8U D 401 | -9.479  | 7.068  | 24.337 | 1.00 | 59.61 |      | C0 |
| ANISOU16158 | CBH H8U D 401 | 6570    | 8620   | 7450   | 400  | 1040  | -170 | C0 |
| HETATM16159 | OBB H8U D 401 | -9.062  | 9.196  | 23.143 | 1.00 | 58.17 |      | O0 |
| ANISOU16159 | OBB H8U D 401 | 6270    | 8560   | 7270   | 110  | 1070  | -310 | O0 |
| HETATM16160 | CAZ H8U D 401 | -8.731  | 8.619  | 21.949 | 1.00 | 57.64 |      | C0 |
| ANISOU16160 | CAZ H8U D 401 | 6270    | 8420   | 7210   | 190  | 1180  | -320 | C0 |
| HETATM16161 | CAY H8U D 401 | -9.808  | 8.549  | 21.081 | 1.00 | 56.18 |      | C0 |
| ANISOU16161 | CAY H8U D 401 | 6290    | 8040   | 7010   | 120  | 1220  | -370 | C0 |
| HETATM16162 | CAX H8U D 401 | -9.644  | 7.994  | 19.821 | 1.00 | 55.88 |      | C0 |
| ANISOU16162 | CAX H8U D 401 | 6350    | 7920   | 6960   | 180  | 1330  | -400 | C0 |
| HETATM16163 | CAM H8U D 401 | -8.455  | 7.535  | 19.420 | 1.00 | 56.76 |      | C0 |
| ANISOU16163 | CAM H8U D 401 | 6350    | 8130   | 7080   | 330  | 1430  | -390 | C0 |
| HETATM16164 | CAH H8U D 401 | -8.044  | 6.920  | 18.211 | 1.00 | 56.98 |      | C0 |
| ANISOU16164 | CAH H8U D 401 | 6450    | 8120   | 7090   | 440  | 1560  | -430 | C0 |
| HETATM16165 | CAI H8U D 401 | -8.825  | 5.622  | 17.922 | 1.00 | 56.48 |      | C0 |
| ANISOU16165 | CAI H8U D 401 | 6630    | 7810   | 7020   | 550  | 1590  | -470 | C0 |
| HETATM16166 | CAG H8U D 401 | -8.187  | 7.825  | 16.903 | 1.00 | 56.21 |      | C0 |
| ANISOU16166 | CAG H8U D 401 | 6390    | 8030   | 6930   | 280  | 1630  | -490 | C0 |
| HETATM16167 | CBI H8U D 401 | -7.057  | 8.855  | 16.770 | 1.00 | 57.31 |      | C0 |
| ANISOU16167 | CBI H8U D 401 | 6290    | 8400   | 7080   | 210  | 1670  | -470 | C0 |
| HETATM16168 | CBJ H8U D 401 | -9.509  | 8.610  | 16.830 | 1.00 | 54.43 |      | C0 |
| ANISOU16168 | CBJ H8U D 401 | 6300    | 7690   | 6690   | 80   | 1540  | -520 | C0 |
| HETATM16169 | CAC H8U D 401 | -8.022  | 6.697  | 15.836 | 1.00 | 57.02 |      | C0 |
| ANISOU16169 | CAC H8U D 401 | 6630    | 8040   | 7000   | 440  | 1760  | -550 | C0 |
| HETATM16170 | CAB H8U D 401 | -8.320  | 6.968  | 14.339 | 1.00 | 56.63 |      | C0 |
| ANISOU16170 | CAB H8U D 401 | 6710    | 7950   | 6860   | 370  | 1850  | -630 | C0 |
| HETATM16171 | CAA H8U D 401 | -9.048  | 5.711  | 13.822 | 1.00 | 56.89 |      | C0 |
| ANISOU16171 | CAA H8U D 401 | 7000    | 7760   | 6860   | 460  | 1880  | -710 | C0 |
| HETATM16172 | CAR H8U D 401 | -8.465  | 4.502  | 14.317 | 1.00 | 58.38 |      | C0 |

|             |               |         |        |        |      |       |      |    |
|-------------|---------------|---------|--------|--------|------|-------|------|----|
| ANISOU16172 | CAR H8U D 401 | 7180    | 7900   | 7100   | 690  | 1930  | -700 | C0 |
| HETATM16173 | OAU H8U D 401 | -8.069  | 3.589  | 13.595 | 1.00 | 59.58 |      | O0 |
| ANISOU16173 | OAU H8U D 401 | 7430    | 7980   | 7230   | 860  | 2050  | -760 | O0 |
| HETATM16174 | NAS H8U D 401 | -8.408  | 4.372  | 15.659 | 1.00 | 58.15 |      | N0 |
| ANISOU16174 | NAS H8U D 401 | 7060    | 7880   | 7160   | 730  | 1830  | -610 | N0 |
| HETATM16175 | CAT H8U D 401 | -7.849  | 3.173  | 16.337 | 1.00 | 59.71 |      | C0 |
| ANISOU16175 | CAT H8U D 401 | 7250    | 8020   | 7420   | 980  | 1860  | -560 | C0 |
| HETATM16176 | CAD H8U D 401 | -8.929  | 5.563  | 16.347 | 1.00 | 56.57 |      | C0 |
| ANISOU16176 | CAD H8U D 401 | 6770    | 7760   | 6970   | 520  | 1710  | -560 | C0 |
| HETATM16177 | CAE H8U D 401 | -10.395 | 5.643  | 15.825 | 1.00 | 54.94 |      | C0 |
| ANISOU16177 | CAE H8U D 401 | 6790    | 7370   | 6720   | 360  | 1650  | -620 | C0 |
| HETATM16178 | NAF H8U D 401 | -10.418 | 5.818  | 14.349 | 1.00 | 55.37 |      | N0 |
| ANISOU16178 | NAF H8U D 401 | 6930    | 7420   | 6680   | 320  | 1740  | -700 | N0 |
| HETATM16179 | CAJ H8U D 401 | -11.183 | 4.811  | 13.584 | 1.00 | 55.97 |      | C0 |
| ANISOU16179 | CAJ H8U D 401 | 7250    | 7300   | 6710   | 350  | 1770  | -800 | C0 |
| HETATM16180 | CAK H8U D 401 | -10.504 | 4.750  | 12.196 | 1.00 | 57.12 |      | C0 |
| ANISOU16180 | CAK H8U D 401 | 7430    | 7510   | 6760   | 410  | 1920  | -880 | C0 |
| HETATM16181 | CAL H8U D 401 | -9.313  | 5.714  | 12.291 | 1.00 | 57.26 |      | C0 |
| ANISOU16181 | CAL H8U D 401 | 7190    | 7780   | 6790   | 420  | 1970  | -800 | C0 |
| HETATM16182 | CAQ H8U D 401 | -8.128  | 5.255  | 11.410 | 1.00 | 59.69 |      | C0 |
| ANISOU16182 | CAQ H8U D 401 | 7450    | 8190   | 7040   | 600  | 2150  | -840 | C0 |
| HETATM16183 | OAW H8U D 401 | -9.703  | 7.009  | 11.845 | 1.00 | 55.59 |      | O0 |
| ANISOU16183 | OAW H8U D 401 | 6950    | 7650   | 6530   | 220  | 1940  | -780 | O0 |
| HETATM16184 | HAO H8U D 401 | -5.447  | 6.937  | 20.111 | 1.00 | 60.34 |      | H0 |
| ANISOU16184 | HAO H8U D 401 | 6320    | 9030   | 7580   | 670  | 1520  | -280 | H0 |
| HETATM16185 | HBE H8U D 401 | -5.389  | 8.097  | 24.056 | 1.00 | 63.15 |      | H0 |
| ANISOU16185 | HBE H8U D 401 | 6320    | 9760   | 7920   | 520  | 1120  | -150 | H0 |
| HETATM16186 | HBD H8U D 401 | -7.062  | 8.318  | 25.572 | 1.00 | 61.45 |      | H0 |
| ANISOU16186 | HBD H8U D 401 | 6280    | 9410   | 7660   | 400  | 940   | -150 | H0 |
| HETATM16187 | HBG H8U D 401 | -10.443 | 9.008  | 25.634 | 1.00 | 57.47 |      | H0 |
| ANISOU16187 | HBG H8U D 401 | 6240    | 8470   | 7130   | 100  | 860   | -240 | H0 |
| HETATM16188 | HBH H8U D 401 | -9.268  | 10.309 | 25.343 | 1.00 | 58.17 |      | H0 |
| ANISOU16188 | HBH H8U D 401 | 6120    | 8760   | 7230   | -30  | 860   | -300 | H0 |
| HETATM16189 | HBI H8U D 401 | -8.879  | 8.986  | 26.466 | 1.00 | 59.44 |      | H0 |
| ANISOU16189 | HBI H8U D 401 | 6220    | 9000   | 7360   | 200  | 820   | -190 | H0 |
| HETATM16190 | HBJ H8U D 401 | -8.823  | 6.343  | 23.855 | 1.00 | 60.76 |      | H0 |
| ANISOU16190 | HBJ H8U D 401 | 6710    | 8760   | 7620   | 540  | 1110  | -150 | H0 |
| HETATM16191 | HBK H8U D 401 | -10.416 | 7.134  | 23.786 | 1.00 | 58.48 |      | H0 |
| ANISOU16191 | HBK H8U D 401 | 6590    | 8320   | 7310   | 310  | 1050  | -220 | H0 |
| HETATM16192 | HBL H8U D 401 | -9.681  | 6.745  | 25.358 | 1.00 | 59.75 |      | H0 |
| ANISOU16192 | HBL H8U D 401 | 6580    | 8670   | 7450   | 440  | 970   | -110 | H0 |
| HETATM16193 | HAY H8U D 401 | -10.775 | 8.918  | 21.383 | 1.00 | 54.75 |      | H0 |
| ANISOU16193 | HAY H8U D 401 | 6200    | 7780   | 6830   | 10   | 1150  | -380 | H0 |
| HETATM16194 | HAX H8U D 401 | -10.505 | 7.949  | 19.165 | 1.00 | 55.15 |      | H0 |
| ANISOU16194 | HAX H8U D 401 | 6420    | 7690   | 6850   | 120  | 1340  | -440 | H0 |
| HETATM16195 | HAJ H8U D 401 | -8.285  | 4.760  | 18.122 | 1.00 | 57.83 |      | H0 |
| ANISOU16195 | HAJ H8U D 401 | 6780    | 7970   | 7220   | 720  | 1640  | -440 | H0 |
| HETATM16196 | HAI H8U D 401 | -9.835  | 5.556  | 18.203 | 1.00 | 55.42 |      | H0 |
| ANISOU16196 | HAI H8U D 401 | 6620    | 7550   | 6890   | 460  | 1520  | -470 | H0 |
| HETATM16197 | HBM H8U D 401 | -7.348  | 9.610  | 16.044 | 1.00 | 56.73 |      | H0 |
| ANISOU16197 | HBM H8U D 401 | 6270    | 8320   | 6970   | 70   | 1690  | -490 | H0 |
| HETATM16198 | HBN H8U D 401 | -6.139  | 8.373  | 16.432 | 1.00 | 58.77 |      | H0 |
| ANISOU16198 | HBN H8U D 401 | 6390    | 8690   | 7260   | 340  | 1770  | -460 | H0 |
| HETATM16199 | HBO H8U D 401 | -6.882  | 9.336  | 17.733 | 1.00 | 56.93 |      | H0 |

|             |               |         |        |        |      |        |      |    |
|-------------|---------------|---------|--------|--------|------|--------|------|----|
| ANISOU16199 | HBO H8U D 401 | 6120    | 8440   | 7070   | 150  | 1580   | -430 | H0 |
| HETATM16200 | HBQ H8U D 401 | -9.697  | 8.940  | 15.813 | 1.00 | 54.37  |      | H0 |
| ANISOU16200 | HBQ H8U D 401 | 6370    | 7660   | 6630   | 10   | 1590   | -550 | H0 |
| HETATM16201 | HBR H8U D 401 | -9.431  | 9.491  | 17.467 | 1.00 | 53.83  |      | H0 |
| ANISOU16201 | HBR H8U D 401 | 6120    | 7700   | 6640   | -30  | 1470   | -490 | H0 |
| HETATM16202 | HBP H8U D 401 | -10.341 | 8.011  | 17.167 | 1.00 | 53.75  |      | H0 |
| ANISOU16202 | HBP H8U D 401 | 6350    | 7470   | 6610   | 100  | 1490   | -520 | H0 |
| HETATM16203 | HAD H8U D 401 | -6.999  | 6.350  | 15.860 | 1.00 | 58.51  |      | H0 |
| ANISOU16203 | HAD H8U D 401 | 6690    | 8340   | 7200   | 590  | 1830   | -530 | H0 |
| HETATM16204 | HAB H8U D 401 | -8.933  | 7.854  | 14.209 | 1.00 | 55.50  |      | H0 |
| ANISOU16204 | HAB H8U D 401 | 6590    | 7800   | 6700   | 190  | 1790   | -620 | H0 |
| HETATM16205 | HAC H8U D 401 | -7.382  | 7.095  | 13.800 | 1.00 | 58.02  |      | H0 |
| ANISOU16205 | HAC H8U D 401 | 6770    | 8260   | 7010   | 420  | 1950   | -620 | H0 |
| HETATM16206 | HAU H8U D 401 | -7.642  | 2.378  | 15.624 | 1.00 | 61.09  |      | H0 |
| ANISOU16206 | HAU H8U D 401 | 7540    | 8100   | 7570   | 1110 | 1970   | -620 | H0 |
| HETATM16207 | HAV H8U D 401 | -8.555  | 2.791  | 17.073 | 1.00 | 59.03  |      | H0 |
| ANISOU16207 | HAV H8U D 401 | 7250    | 7810   | 7370   | 960  | 1780   | -530 | H0 |
| HETATM16208 | HAT H8U D 401 | -6.917  | 3.424  | 16.845 | 1.00 | 60.40  |      | H0 |
| ANISOU16208 | HAT H8U D 401 | 7130    | 8290   | 7530   | 1060 | 1870   | -490 | H0 |
| HETATM16209 | HAF H8U D 401 | -10.895 | 4.710  | 16.079 | 1.00 | 55.18  |      | H0 |
| ANISOU16209 | HAF H8U D 401 | 6950    | 7250   | 6770   | 430  | 1630   | -630 | H0 |
| HETATM16210 | HAE H8U D 401 | -10.939 | 6.454  | 16.287 | 1.00 | 53.62  |      | H0 |
| ANISOU16210 | HAE H8U D 401 | 6580    | 7230   | 6560   | 220  | 1560   | -590 | H0 |
| HETATM16211 | HAL H8U D 401 | -11.158 | 3.831  | 14.051 | 1.00 | 56.55  |      | H0 |
| ANISOU16211 | HAL H8U D 401 | 7390    | 7260   | 6840   | 470  | 1780   | -800 | H0 |
| HETATM16212 | HAK H8U D 401 | -12.218 | 5.139  | 13.476 | 1.00 | 54.71  |      | H0 |
| ANISOU16212 | HAK H8U D 401 | 7190    | 7070   | 6530   | 200  | 1700   | -810 | H0 |
| HETATM16213 | HAN H8U D 401 | -10.176 | 3.732  | 11.989 | 1.00 | 58.61  |      | H0 |
| ANISOU16213 | HAN H8U D 401 | 7700    | 7620   | 6950   | 570  | 2000   | -930 | H0 |
| HETATM16214 | HAM H8U D 401 | -11.198 | 5.084  | 11.424 | 1.00 | 56.74  |      | H0 |
| ANISOU16214 | HAM H8U D 401 | 7490    | 7440   | 6630   | 290  | 1900   | -930 | H0 |
| HETATM16215 | HAQ H8U D 401 | -8.037  | 5.922  | 10.552 | 1.00 | 59.79  |      | H0 |
| ANISOU16215 | HAQ H8U D 401 | 7450    | 8300   | 6980   | 510  | 2200   | -860 | H0 |
| HETATM16216 | HAR H8U D 401 | -8.290  | 4.239  | 11.050 | 1.00 | 60.65  |      | H0 |
| ANISOU16216 | HAR H8U D 401 | 7720    | 8180   | 7140   | 720  | 2200   | -920 | H0 |
| HETATM16217 | HAS H8U D 401 | -7.210  | 5.288  | 11.976 | 1.00 | 60.34  |      | H0 |
| ANISOU16217 | HAS H8U D 401 | 7340    | 8400   | 7180   | 690  | 2180   | -780 | H0 |
| HETATM16218 | HBS H8U D 401 | -10.800 | 6.719  | 14.143 | 1.00 | 54.38  |      | H0 |
| ANISOU16218 | HBS H8U D 401 | 6790    | 7340   | 6530   | 180  | 1700   | -700 | H0 |
| HETATM16219 | C1 NAG D 402  | -28.967 | 36.393 | -6.551 | 1.00 | 97.28  |      | C0 |
| ANISOU16219 | C1 NAG D 402  | 14530   | 12640  | 9800   | 450  | 1000   | 4100 | C0 |
| HETATM16220 | C2 NAG D 402  | -27.828 | 36.464 | -7.570 | 1.00 | 100.23 |      | C0 |
| ANISOU16220 | C2 NAG D 402  | 15000   | 13070  | 10010  | 290  | 1160   | 4250 | C0 |
| HETATM16221 | C3 NAG D 402  | -27.685 | 37.865 | -8.163 | 1.00 | 103.97 |      | C0 |
| ANISOU16221 | C3 NAG D 402  | 15680   | 13320  | 10500  | 370  | 1260   | 4640 | C0 |
| HETATM16222 | C4 NAG D 402  | -29.036 | 38.473 | -8.539 | 1.00 | 106.14 |      | C0 |
| ANISOU16222 | C4 NAG D 402  | 15990   | 13660  | 10680  | 670  | 1110   | 4890 | C0 |
| HETATM16223 | C5 NAG D 402  | -30.068 | 38.286 | -7.428 | 1.00 | 103.87 |      | C0 |
| ANISOU16223 | C5 NAG D 402  | 15570   | 13310  | 10580  | 830  | 960    | 4690 | C0 |
| HETATM16224 | C6 NAG D 402  | -31.447 | 38.806 | -7.833 | 1.00 | 106.26 |      | C0 |
| ANISOU16224 | C6 NAG D 402  | 15870   | 13740  | 10770  | 1150 | 810    | 4930 | C0 |
| HETATM16225 | C7 NAG D 402  | -25.637 | 35.304 | -7.555 | 1.00 | 99.51  |      | C0 |
| ANISOU16225 | C7 NAG D 402  | 14850   | 13050  | 9910   | -140 | 1390   | 3930 | C0 |
| HETATM16226 | C8 NAG D 402  | -24.425 | 34.931 | -6.745 | 1.00 | 97.40  |      | C0 |

|             |     |           |         |         |        |      |        |      |    |
|-------------|-----|-----------|---------|---------|--------|------|--------|------|----|
| ANISOU16226 | C8  | NAG D 402 | 14520   | 12630   | 9850   | -370 | 1520   | 3700 | C0 |
| HETATM16227 | N2  | NAG D 402 | -26.587 | 36.024  | -6.934 | 1.00 | 98.97  |      | N0 |
| ANISOU16227 | N2  | NAG D 402 | 14810   | 12780   | 10010  | 30   | 1290   | 4010 | N0 |
| HETATM16228 | O3  | NAG D 402 | -26.873 | 37.799  | -9.315 | 1.00 | 106.36 |      | O0 |
| ANISOU16228 | O3  | NAG D 402 | 16050   | 13800   | 10570  | 240  | 1380   | 4800 | O0 |
| HETATM16229 | O4  | NAG D 402 | -28.858 | 39.846  | -8.822 | 1.00 | 109.38 |      | O0 |
| ANISOU16229 | O4  | NAG D 402 | 16600   | 13760   | 11190  | 750  | 1230   | 5230 | O0 |
| HETATM16230 | O5  | NAG D 402 | -30.162 | 36.913  | -7.098 | 1.00 | 100.35 |      | O0 |
| ANISOU16230 | O5  | NAG D 402 | 14930   | 13140   | 10050  | 720  | 870    | 4350 | O0 |
| HETATM16231 | O6  | NAG D 402 | -32.085 | 37.888  | -8.692 | 1.00 | 106.33 |      | O0 |
| ANISOU16231 | O6  | NAG D 402 | 15740   | 14230   | 10440  | 1190 | 660    | 4910 | O0 |
| HETATM16232 | O7  | NAG D 402 | -25.704 | 34.941  | -8.734 | 1.00 | 101.65 |      | O0 |
| ANISOU16232 | O7  | NAG D 402 | 15130   | 13630   | 9870   | -120 | 1380   | 4040 | O0 |
| HETATM16233 | H1  | NAG D 402 | -28.689 | 36.979  | -5.674 | 1.00 | 97.16  |      | H0 |
| ANISOU16233 | H1  | NAG D 402 | 14570   | 12300   | 10050  | 430  | 1070   | 4060 | H0 |
| HETATM16234 | H2  | NAG D 402 | -28.070 | 35.789  | -8.391 | 1.00 | 100.56 |      | H0 |
| ANISOU16234 | H2  | NAG D 402 | 14990   | 13440   | 9770   | 300  | 1090   | 4240 | H0 |
| HETATM16235 | H3  | NAG D 402 | -27.210 | 38.505  | -7.420 | 1.00 | 103.81 |      | H0 |
| ANISOU16235 | H3  | NAG D 402 | 15730   | 12960   | 10750  | 300  | 1360   | 4630 | H0 |
| HETATM16236 | H4  | NAG D 402 | -29.406 | 37.964  | -9.429 | 1.00 | 107.07 |      | H0 |
| ANISOU16236 | H4  | NAG D 402 | 16050   | 14120   | 10510  | 720  | 1030   | 4940 | H0 |
| HETATM16237 | H5  | NAG D 402 | -29.737 | 38.856  | -6.559 | 1.00 | 103.32 |      | H0 |
| ANISOU16237 | H5  | NAG D 402 | 15570   | 12900   | 10790  | 790  | 1040   | 4640 | H0 |
| HETATM16238 | H61 | NAG D 402 | -31.353 | 39.774  | -8.325 | 1.00 | 109.08 |      | H0 |
| ANISOU16238 | H61 | NAG D 402 | 16390   | 13930   | 11130  | 1240 | 880    | 5230 | H0 |
| HETATM16239 | H62 | NAG D 402 | -32.056 | 38.947  | -6.939 | 1.00 | 105.27 |      | H0 |
| ANISOU16239 | H62 | NAG D 402 | 15690   | 13480   | 10830  | 1260 | 750    | 4820 | H0 |
| HETATM16240 | H81 | NAG D 402 | -24.464 | 35.404  | -5.764 | 1.00 | 96.46  |      | H0 |
| ANISOU16240 | H81 | NAG D 402 | 14410   | 12250   | 9990   | -370 | 1520   | 3640 | H0 |
| HETATM16241 | H82 | NAG D 402 | -23.525 | 35.255  | -7.268 | 1.00 | 98.79  |      | H0 |
| ANISOU16241 | H82 | NAG D 402 | 14760   | 12790   | 9990   | -490 | 1670   | 3820 | H0 |
| HETATM16242 | H83 | NAG D 402 | -24.397 | 33.850  | -6.610 | 1.00 | 95.40  |      | H0 |
| ANISOU16242 | H83 | NAG D 402 | 14150   | 12570   | 9520   | -410 | 1470   | 3460 | H0 |
| HETATM16243 | HN2 | NAG D 402 | -26.455 | 36.279  | -5.966 | 1.00 | 97.67  |      | H0 |
| ANISOU16243 | HN2 | NAG D 402 | 14640   | 12380   | 10090  | 0    | 1310   | 3900 | H0 |
| HETATM16244 | OAV | H8U E 401 | -21.031 | -24.909 | 16.881 | 1.00 | 52.95  |      | O0 |
| ANISOU16244 | OAV | H8U E 401 | 7230    | 6090    | 6790   | 60   | 1430   | 430  | O0 |
| HETATM16245 | CAP | H8U E 401 | -20.643 | -23.914 | 17.492 | 1.00 | 51.94  |      | C0 |
| ANISOU16245 | CAP | H8U E 401 | 6930    | 6120    | 6690   | 130  | 1370   | 470  | C0 |
| HETATM16246 | NAO | H8U E 401 | -19.856 | -23.997 | 18.551 | 1.00 | 52.42  |      | N0 |
| ANISOU16246 | NAO | H8U E 401 | 6940    | 6170    | 6810   | 260  | 1310   | 570  | N0 |
| HETATM16247 | CAN | H8U E 401 | -19.668 | -22.771 | 19.030 | 1.00 | 51.55  |      | C0 |
| ANISOU16247 | CAN | H8U E 401 | 6640    | 6250    | 6700   | 290  | 1240   | 580  | C0 |
| HETATM16248 | CBA | H8U E 401 | -19.047 | -22.412 | 20.169 | 1.00 | 52.17  |      | C0 |
| ANISOU16248 | CBA | H8U E 401 | 6620    | 6400    | 6810   | 380  | 1160   | 670  | C0 |
| HETATM16249 | OBF | H8U E 401 | -18.513 | -23.474 | 20.843 | 1.00 | 54.69  |      | O0 |
| ANISOU16249 | OBF | H8U E 401 | 7040    | 6570    | 7180   | 480  | 1130   | 760  | O0 |
| HETATM16250 | CBE | H8U E 401 | -17.954 | -23.350 | 22.088 | 1.00 | 55.59  |      | C0 |
| ANISOU16250 | CBE | H8U E 401 | 7090    | 6730    | 7300   | 560  | 1020   | 860  | C0 |
| HETATM16251 | CBD | H8U E 401 | -17.993 | -22.313 | 23.018 | 1.00 | 55.08  |      | C0 |
| ANISOU16251 | CBD | H8U E 401 | 6890    | 6850    | 7190   | 540  | 930    | 900  | C0 |
| HETATM16252 | CBC | H8U E 401 | -18.594 | -21.051 | 22.922 | 1.00 | 53.76  |      | C0 |
| ANISOU16252 | CBC | H8U E 401 | 6600    | 6860    | 6960   | 440  | 920    | 830  | C0 |
| HETATM16253 | CBG | H8U E 401 | -17.913 | -20.103 | 23.925 | 1.00 | 53.83  |      | C0 |

|             |               |         |         |        |      |       |     |    |
|-------------|---------------|---------|---------|--------|------|-------|-----|----|
| ANISOU16253 | CBG H8U E 401 | 6470    | 7010    | 6970   | 500  | 810   | 880 | C0 |
| HETATM16254 | CBH H8U E 401 | -20.082 | -21.116 | 23.280 | 1.00 | 53.27 |     | C0 |
| ANISOU16254 | CBH H8U E 401 | 6630    | 6850    | 6760   | 250  | 930   | 840 | C0 |
| HETATM16255 | OBB H8U E 401 | -18.405 | -20.482 | 21.603 | 1.00 | 52.64 |     | O0 |
| ANISOU16255 | OBB H8U E 401 | 6390    | 6740    | 6870   | 440  | 1000  | 730 | O0 |
| HETATM16256 | CAZ H8U E 401 | -18.999 | -21.077 | 20.525 | 1.00 | 51.27 |     | C0 |
| ANISOU16256 | CAZ H8U E 401 | 6330    | 6470    | 6680   | 370  | 1100  | 660 | C0 |
| HETATM16257 | CAY H8U E 401 | -19.611 | -20.149 | 19.691 | 1.00 | 49.81 |     | C0 |
| ANISOU16257 | CAY H8U E 401 | 6090    | 6390    | 6450   | 280  | 1140  | 570 | C0 |
| HETATM16258 | CAX H8U E 401 | -20.251 | -20.585 | 18.534 | 1.00 | 49.53 |     | C0 |
| ANISOU16258 | CAX H8U E 401 | 6160    | 6290    | 6380   | 200  | 1220  | 490 | C0 |
| HETATM16259 | CAM H8U E 401 | -20.279 | -21.882 | 18.212 | 1.00 | 50.17 |     | C0 |
| ANISOU16259 | CAM H8U E 401 | 6400    | 6190    | 6470   | 190  | 1270  | 490 | C0 |
| HETATM16260 | CAH H8U E 401 | -20.871 | -22.573 | 17.125 | 1.00 | 50.30 |     | C0 |
| ANISOU16260 | CAH H8U E 401 | 6560    | 6110    | 6450   | 100  | 1350  | 420 | C0 |
| HETATM16261 | CAI H8U E 401 | -22.362 | -22.280 | 17.049 | 1.00 | 49.46 |     | C0 |
| ANISOU16261 | CAI H8U E 401 | 6460    | 6110    | 6220   | -100 | 1320  | 390 | C0 |
| HETATM16262 | CAG H8U E 401 | -20.277 | -22.247 | 15.680 | 1.00 | 50.06 |     | C0 |
| ANISOU16262 | CAG H8U E 401 | 6520    | 6050    | 6460   | 150  | 1440  | 320 | C0 |
| HETATM16263 | CBI H8U E 401 | -18.977 | -23.007 | 15.420 | 1.00 | 51.53 |     | C0 |
| ANISOU16263 | CBI H8U E 401 | 6750    | 6070    | 6760   | 320  | 1520  | 320 | C0 |
| HETATM16264 | CBJ H8U E 401 | -19.976 | -20.758 | 15.431 | 1.00 | 48.61 |     | C0 |
| ANISOU16264 | CBJ H8U E 401 | 6160    | 6040    | 6270   | 180  | 1420  | 290 | C0 |
| HETATM16265 | CAC H8U E 401 | -21.429 | -22.844 | 14.824 | 1.00 | 50.28 |     | C0 |
| ANISOU16265 | CAC H8U E 401 | 6700    | 6020    | 6380   | -20  | 1480  | 240 | C0 |
| HETATM16266 | CAB H8U E 401 | -21.542 | -22.548 | 13.308 | 1.00 | 50.10 |     | C0 |
| ANISOU16266 | CAB H8U E 401 | 6720    | 6000    | 6310   | -60  | 1550  | 130 | C0 |
| HETATM16267 | CAA H8U E 401 | -23.057 | -22.371 | 13.031 | 1.00 | 49.63 |     | C0 |
| ANISOU16267 | CAA H8U E 401 | 6690    | 6040    | 6120   | -260 | 1490  | 90  | C0 |
| HETATM16268 | CAR H8U E 401 | -23.862 | -23.325 | 13.750 | 1.00 | 50.49 |     | C0 |
| ANISOU16268 | CAR H8U E 401 | 6890    | 6100    | 6200   | -380 | 1460  | 140 | C0 |
| HETATM16269 | OAU H8U E 401 | -24.679 | -24.068 | 13.206 | 1.00 | 51.18 |     | O0 |
| ANISOU16269 | OAU H8U E 401 | 7110    | 6120    | 6210   | -540 | 1480  | 80  | O0 |
| HETATM16270 | NAS H8U E 401 | -23.723 | -23.329 | 15.091 | 1.00 | 50.02 |     | N0 |
| ANISOU16270 | NAS H8U E 401 | 6760    | 6070    | 6170   | -340 | 1410  | 240 | N0 |
| HETATM16271 | CAT H8U E 401 | -24.476 | -24.237 | 15.997 | 1.00 | 51.26 |     | C0 |
| ANISOU16271 | CAT H8U E 401 | 7020    | 6170    | 6290   | -460 | 1380  | 300 | C0 |
| HETATM16272 | CAD H8U E 401 | -22.710 | -22.355 | 15.527 | 1.00 | 49.30 |     | C0 |
| ANISOU16272 | CAD H8U E 401 | 6510    | 6060    | 6160   | -170 | 1390  | 270 | C0 |
| HETATM16273 | CAE H8U E 401 | -23.250 | -20.992 | 14.992 | 1.00 | 47.81 |     | C0 |
| ANISOU16273 | CAE H8U E 401 | 6190    | 6060    | 5910   | -210 | 1350  | 220 | C0 |
| HETATM16274 | NAF H8U E 401 | -23.361 | -21.020 | 13.514 | 1.00 | 48.25 |     | N0 |
| ANISOU16274 | NAF H8U E 401 | 6330    | 6080    | 5930   | -260 | 1410  | 120 | N0 |
| HETATM16275 | CAJ H8U E 401 | -24.674 | -20.678 | 12.927 | 1.00 | 47.80 |     | C0 |
| ANISOU16275 | CAJ H8U E 401 | 6270    | 6140    | 5750   | -410 | 1370  | 70  | C0 |
| HETATM16276 | CAK H8U E 401 | -24.740 | -21.438 | 11.594 | 1.00 | 48.83 |     | C0 |
| ANISOU16276 | CAK H8U E 401 | 6570    | 6140    | 5840   | -480 | 1430  | -20 | C0 |
| HETATM16277 | CAL H8U E 401 | -23.422 | -22.224 | 11.523 | 1.00 | 49.54 |     | C0 |
| ANISOU16277 | CAL H8U E 401 | 6760    | 6030    | 6030   | -340 | 1540  | -20 | C0 |
| HETATM16278 | CAQ H8U E 401 | -23.601 | -23.543 | 10.741 | 1.00 | 50.81 |     | C0 |
| ANISOU16278 | CAQ H8U E 401 | 7140    | 6000    | 6160   | -430 | 1610  | -80 | C0 |
| HETATM16279 | OAW H8U E 401 | -22.443 | -21.422 | 10.872 | 1.00 | 48.84 |     | O0 |
| ANISOU16279 | OAW H8U E 401 | 6610    | 5970    | 5980   | -220 | 1590  | -50 | O0 |
| HETATM16280 | HAO H8U E 401 | -19.595 | -24.845 | 19.011 | 1.00 | 53.71 |     | H0 |



|             |               |         |         |        |      |       |     |    |
|-------------|---------------|---------|---------|--------|------|-------|-----|----|
| ANISOU16280 | HAO H8U E 401 | 7200    | 6210    | 7000   | 310  | 1300  | 630 | H0 |
| HETATM16281 | HBE H8U E 401 | -17.406 | -24.230 | 22.422 | 1.00 | 57.07 |     | H0 |
| ANISOU16281 | HBE H8U E 401 | 7360    | 6780    | 7540   | 670  | 1000  | 930 | H0 |
| HETATM16282 | HBD H8U E 401 | -17.449 | -22.517 | 23.941 | 1.00 | 55.89 |     | H0 |
| ANISOU16282 | HBD H8U E 401 | 6990    | 6940    | 7310   | 620  | 850   | 980 | H0 |
| HETATM16283 | HBG H8U E 401 | -18.515 | -19.202 | 24.038 | 1.00 | 52.61 |     | H0 |
| ANISOU16283 | HBG H8U E 401 | 6260    | 6980    | 6750   | 410  | 800   | 840 | H0 |
| HETATM16284 | HBH H8U E 401 | -16.922 | -19.834 | 23.557 | 1.00 | 53.91 |     | H0 |
| ANISOU16284 | HBH H8U E 401 | 6370    | 7030    | 7080   | 600  | 810   | 860 | H0 |
| HETATM16285 | HBI H8U E 401 | -17.821 | -20.586 | 24.898 | 1.00 | 54.61 |     | H0 |
| ANISOU16285 | HBI H8U E 401 | 6620    | 7080    | 7040   | 520  | 740   | 970 | H0 |
| HETATM16286 | HBJ H8U E 401 | -20.528 | -22.004 | 22.830 | 1.00 | 53.93 |     | H0 |
| ANISOU16286 | HBJ H8U E 401 | 6840    | 6820    | 6830   | 200  | 990   | 830 | H0 |
| HETATM16287 | HBK H8U E 401 | -20.586 | -20.227 | 22.901 | 1.00 | 52.12 |     | H0 |
| ANISOU16287 | HBK H8U E 401 | 6400    | 6820    | 6580   | 190  | 940   | 770 | H0 |
| HETATM16288 | HBL H8U E 401 | -20.196 | -21.165 | 24.363 | 1.00 | 53.66 |     | H0 |
| ANISOU16288 | HBL H8U E 401 | 6700    | 6940    | 6750   | 240  | 860   | 910 | H0 |
| HETATM16289 | HAY H8U E 401 | -19.590 | -19.096 | 19.932 | 1.00 | 48.82 |     | H0 |
| ANISOU16289 | HAY H8U E 401 | 5850    | 6400    | 6300   | 280  | 1090  | 560 | H0 |
| HETATM16290 | HAX H8U E 401 | -20.729 | -19.855 | 17.893 | 1.00 | 48.59 |     | H0 |
| ANISOU16290 | HAX H8U E 401 | 6000    | 6250    | 6210   | 140  | 1230  | 430 | H0 |
| HETATM16291 | HAJ H8U E 401 | -22.975 | -23.008 | 17.459 | 1.00 | 50.14 |     | H0 |
| ANISOU16291 | HAJ H8U E 401 | 6640    | 6150    | 6260   | -190 | 1310  | 420 | H0 |
| HETATM16292 | HAI H8U E 401 | -22.643 | -21.299 | 17.281 | 1.00 | 48.38 |     | H0 |
| ANISOU16292 | HAI H8U E 401 | 6200    | 6130    | 6050   | -110 | 1270  | 380 | H0 |
| HETATM16293 | HBM H8U E 401 | -18.488 | -22.577 | 14.552 | 1.00 | 51.37 |     | H0 |
| ANISOU16293 | HBM H8U E 401 | 6680    | 6070    | 6760   | 370  | 1580  | 250 | H0 |
| HETATM16294 | HBN H8U E 401 | -19.170 | -24.063 | 15.227 | 1.00 | 52.67 |     | H0 |
| ANISOU16294 | HBN H8U E 401 | 7050    | 6060    | 6900   | 310  | 1560  | 310 | H0 |
| HETATM16295 | HBO H8U E 401 | -18.321 | -22.903 | 16.284 | 1.00 | 51.67 |     | H0 |
| ANISOU16295 | HBO H8U E 401 | 6670    | 6110    | 6840   | 430  | 1470  | 390 | H0 |
| HETATM16296 | HBQ H8U E 401 | -19.845 | -20.567 | 14.370 | 1.00 | 48.64 |     | H0 |
| ANISOU16296 | HBQ H8U E 401 | 6190    | 6030    | 6270   | 170  | 1490  | 210 | H0 |
| HETATM16297 | HBR H8U E 401 | -19.050 | -20.498 | 15.943 | 1.00 | 48.70 |     | H0 |
| ANISOU16297 | HBR H8U E 401 | 6070    | 6070    | 6370   | 290  | 1410  | 330 | H0 |
| HETATM16298 | HBP H8U E 401 | -20.768 | -20.130 | 15.813 | 1.00 | 47.75 |     | H0 |
| ANISOU16298 | HBP H8U E 401 | 6000    | 6050    | 6100   | 100  | 1360  | 300 | H0 |
| HETATM16299 | HAD H8U E 401 | -21.387 | -23.924 | 14.897 | 1.00 | 51.52 |     | H0 |
| ANISOU16299 | HAD H8U E 401 | 7000    | 6020    | 6550   | -20  | 1510  | 260 | H0 |
| HETATM16300 | HAB H8U E 401 | -20.983 | -21.661 | 13.028 | 1.00 | 49.38 |     | H0 |
| ANISOU16300 | HAB H8U E 401 | 6520    | 5990    | 6250   | 10   | 1560  | 110 | H0 |
| HETATM16301 | HAC H8U E 401 | -21.167 | -23.404 | 12.744 | 1.00 | 51.27 |     | H0 |
| ANISOU16301 | HAC H8U E 401 | 7000    | 5990    | 6490   | -40  | 1630  | 90  | H0 |
| HETATM16302 | HAU H8U E 401 | -25.193 | -24.838 | 15.442 | 1.00 | 51.95 |     | H0 |
| ANISOU16302 | HAU H8U E 401 | 7210    | 6210    | 6310   | -610 | 1410  | 250 | H0 |
| HETATM16303 | HAV H8U E 401 | -25.022 | -23.663 | 16.744 | 1.00 | 50.48 |     | H0 |
| ANISOU16303 | HAV H8U E 401 | 6810    | 6220    | 6150   | -510 | 1320  | 340 | H0 |
| HETATM16304 | HAT H8U E 401 | -23.792 | -24.915 | 16.509 | 1.00 | 51.99 |     | H0 |
| ANISOU16304 | HAT H8U E 401 | 7190    | 6130    | 6440   | -380 | 1400  | 360 | H0 |
| HETATM16305 | HAF H8U E 401 | -24.236 | -20.821 | 15.423 | 1.00 | 47.62 |     | H0 |
| ANISOU16305 | HAF H8U E 401 | 6140    | 6140    | 5820   | -310 | 1300  | 230 | H0 |
| HETATM16306 | HAE H8U E 401 | -22.607 | -20.169 | 15.273 | 1.00 | 47.14 |     | H0 |
| ANISOU16306 | HAE H8U E 401 | 6000    | 6040    | 5870   | -110 | 1330  | 240 | H0 |
| HETATM16307 | HAL H8U E 401 | -25.490 | -20.990 | 13.568 | 1.00 | 48.08 |     | H0 |

|                           |         |         |         |       |        |      |    |
|---------------------------|---------|---------|---------|-------|--------|------|----|
| ANISOU16307 HAL H8U E 401 | 6300    | 6220    | 5750    | -500  | 1320   | 90   | H0 |
| HETATM16308 HAK H8U E 401 | -24.737 | -19.604 | 12.749  | 1.00  | 46.93  |      | H0 |
| ANISOU16308 HAK H8U E 401 | 6060    | 6150    | 5620    | -370  | 1330   | 50   | H0 |
| HETATM16309 HAN H8U E 401 | -25.601 | -22.105 | 11.593  | 1.00  | 49.54  |      | H0 |
| ANISOU16309 HAN H8U E 401 | 6740    | 6220    | 5870    | -610  | 1410   | -40  | H0 |
| HETATM16310 HAM H8U E 401 | -24.807 | -20.735 | 10.763  | 1.00  | 48.43  |      | H0 |
| ANISOU16310 HAM H8U E 401 | 6500    | 6150    | 5740    | -480  | 1430   | -70  | H0 |
| HETATM16311 HAQ H8U E 401 | -23.227 | -23.407 | 9.725   | 1.00  | 51.20  |      | H0 |
| ANISOU16311 HAQ H8U E 401 | 7250    | 6020    | 6190    | -400  | 1670   | -160 | H0 |
| HETATM16312 HAR H8U E 401 | -24.652 | -23.828 | 10.692  | 1.00  | 51.25  |      | H0 |
| ANISOU16312 HAR H8U E 401 | 7250    | 6100    | 6130    | -590  | 1560   | -100 | H0 |
| HETATM16313 HAS H8U E 401 | -23.033 | -24.334 | 11.218  | 1.00  | 51.76  |      | H0 |
| ANISOU16313 HAS H8U E 401 | 7340    | 5980    | 6350    | -360  | 1650   | -50  | H0 |
| HETATM16314 HBS H8U E 401 | -22.697 | -20.370 | 13.147  | 1.00  | 47.68  |      | H0 |
| ANISOU16314 HBS H8U E 401 | 6200    | 6030    | 5890    | -170  | 1430   | 100  | H0 |
| HETATM16315 C1 NAG E 402  | -3.418  | 5.049   | -12.252 | 1.00  | 100.77 |      | C0 |
| ANISOU16315 C1 NAG E 402  | 15760   | 12640   | 9890    | -3580 | 5480   | 140  | C0 |
| HETATM16316 C2 NAG E 402  | -2.801  | 3.951   | -13.141 | 1.00  | 103.63 |      | C0 |
| ANISOU16316 C2 NAG E 402  | 16020   | 13150   | 10210   | -3570 | 5800   | 20   | C0 |
| HETATM16317 C3 NAG E 402  | -2.070  | 4.411   | -14.411 | 1.00  | 107.59 |      | C0 |
| ANISOU16317 C3 NAG E 402  | 16770   | 13650   | 10460   | -3860 | 6140   | 30   | C0 |
| HETATM16318 C4 NAG E 402  | -2.487  | 5.787   | -14.906 | 1.00  | 108.75 |      | C0 |
| ANISOU16318 C4 NAG E 402  | 17390   | 13590   | 10340   | -4080 | 6060   | 180  | C0 |
| HETATM16319 C5 NAG E 402  | -2.542  | 6.732   | -13.717 | 1.00  | 107.34 |      | C0 |
| ANISOU16319 C5 NAG E 402  | 17110   | 13340   | 10330   | -4110 | 5830   | 270  | C0 |
| HETATM16320 C6 NAG E 402  | -2.789  | 8.185   | -14.123 | 1.00  | 109.19 |      | C0 |
| ANISOU16320 C6 NAG E 402  | 17810   | 13360   | 10320   | -4340 | 5770   | 420  | C0 |
| HETATM16321 C7 NAG E 402  | -2.013  | 1.906   | -12.000 | 1.00  | 104.38 |      | C0 |
| ANISOU16321 C7 NAG E 402  | 15330   | 13540   | 10800   | -3230 | 5890   | -200 | C0 |
| HETATM16322 C8 NAG E 402  | -0.914  | 1.274   | -11.190 | 1.00  | 104.99 |      | C0 |
| ANISOU16322 C8 NAG E 402  | 14870   | 13820   | 11200   | -3170 | 6030   | -300 | C0 |
| HETATM16323 N2 NAG E 402  | -1.840  | 3.184   | -12.356 | 1.00  | 104.60 |      | N0 |
| ANISOU16323 N2 NAG E 402  | 15610   | 13470   | 10660   | -3500 | 5930   | -100 | N0 |
| HETATM16324 O3 NAG E 402  | -2.266  | 3.471   | -15.444 | 1.00  | 108.86 |      | O0 |
| ANISOU16324 O3 NAG E 402  | 17070   | 13840   | 10450   | -3780 | 6290   | -50  | O0 |
| HETATM16325 O4 NAG E 402  | -1.555  | 6.230   | -15.866 | 1.00  | 112.46 |      | O0 |
| ANISOU16325 O4 NAG E 402  | 18010   | 14100   | 10630   | -4390 | 6410   | 190  | O0 |
| HETATM16326 O5 NAG E 402  | -3.602  | 6.294   | -12.902 | 1.00  | 103.16 |      | O0 |
| ANISOU16326 O5 NAG E 402  | 16500   | 12770   | 9930    | -3800 | 5480   | 270  | O0 |
| HETATM16327 O6 NAG E 402  | -4.036  | 8.294   | -14.775 | 1.00  | 108.60 |      | O0 |
| ANISOU16327 O6 NAG E 402  | 18170   | 13110   | 9980    | -4200 | 5550   | 510  | O0 |
| HETATM16328 O7 NAG E 402  | -3.006  | 1.238   | -12.294 | 1.00  | 103.25 |      | O0 |
| ANISOU16328 O7 NAG E 402  | 15360   | 13320   | 10560   | -3040 | 5740   | -210 | O0 |
| HETATM16329 H1 NAG E 402  | -2.760  | 5.201   | -11.395 | 1.00  | 100.93 |      | H0 |
| ANISOU16329 H1 NAG E 402  | 15470   | 12750   | 10130   | -3620 | 5500   | 120  | H0 |
| HETATM16330 H2 NAG E 402  | -3.604  | 3.297   | -13.481 | 1.00  | 102.48 |      | H0 |
| ANISOU16330 H2 NAG E 402  | 16000   | 12960   | 9980    | -3400 | 5690   | 0    | H0 |
| HETATM16331 H3 NAG E 402  | -1.005  | 4.504   | -14.199 | 1.00  | 109.17 |      | H0 |
| ANISOU16331 H3 NAG E 402  | 16700   | 13980   | 10800   | -4010 | 6360   | -20  | H0 |
| HETATM16332 H4 NAG E 402  | -3.471  | 5.702   | -15.368 | 1.00  | 107.99 |      | H0 |
| ANISOU16332 H4 NAG E 402  | 17600   | 13380   | 10050   | -3960 | 5890   | 230  | H0 |
| HETATM16333 H5 NAG E 402  | -1.588  | 6.679   | -13.193 | 1.00  | 108.02 |      | H0 |
| ANISOU16333 H5 NAG E 402  | 16850   | 13570   | 10620   | -4210 | 5980   | 210  | H0 |
| HETATM16334 H61 NAG E 402 | -1.975  | 8.533   | -14.759 | 1.00  | 111.96 |      | H0 |

|             |               |         |         |         |            |       |      |    |
|-------------|---------------|---------|---------|---------|------------|-------|------|----|
| ANISOU16334 | H61 NAG E 402 | 18240   | 13740   | 10560   | -4600      | 6040  | 420  | H0 |
| HETATM16335 | H62 NAG E 402 | -2.798  | 8.809   | -13.229 | 1.00108.23 |       |      | H0 |
| ANISOU16335 | H62 NAG E 402 | 17600   | 13180   | 10340   | -4360      | 5610  | 460  | H0 |
| HETATM16336 | H81 NAG E 402 | -0.234  | 2.037   | -10.811 | 1.00105.93 |       |      | H0 |
| ANISOU16336 | H81 NAG E 402 | 14870   | 13990   | 11400   | -3350      | 6080  | -270 | H0 |
| HETATM16337 | H82 NAG E 402 | -0.362  | 0.568   | -11.811 | 1.00106.53 |       |      | H0 |
| ANISOU16337 | H82 NAG E 402 | 14980   | 14110   | 11380   | -3160      | 6280  | -400 | H0 |
| HETATM16338 | H83 NAG E 402 | -1.346  | 0.750   | -10.338 | 1.00102.53 |       |      | H0 |
| ANISOU16338 | H83 NAG E 402 | 14380   | 13510   | 11060   | -2960      | 5820  | -320 | H0 |
| HETATM16339 | HN2 NAG E 402 | -0.996  | 3.662   | -12.074 | 1.00106.00 |       |      | H0 |
| ANISOU16339 | HN2 NAG E 402 | 15620   | 13730   | 10930   | -3670      | 6060  | -100 | H0 |
| HETATM16340 | O HOH A 501   | -49.997 | -32.447 | 15.249  | 1.00       | 46.41 |      | O0 |
| HETATM16341 | O HOH A 502   | -40.885 | -30.826 | 12.215  | 1.00       | 47.24 |      | O0 |
| HETATM16342 | O HOH A 503   | -28.142 | -30.528 | 4.110   | 1.00       | 43.91 |      | O0 |
| HETATM16343 | O HOH A 504   | -24.124 | -16.169 | 22.934  | 1.00       | 39.93 |      | O0 |
| HETATM16344 | O HOH A 505   | -28.331 | -5.395  | 26.543  | 1.00       | 59.40 |      | O0 |
| HETATM16345 | O HOH A 506   | -42.912 | -14.146 | 38.702  | 1.00       | 46.26 |      | O0 |
| HETATM16346 | O HOH A 507   | -36.932 | -20.063 | 4.210   | 1.00       | 33.66 |      | O0 |
| HETATM16347 | O HOH A 508   | -45.399 | -15.706 | 28.747  | 1.00       | 38.89 |      | O0 |
| HETATM16348 | O HOH A 509   | -48.874 | -26.407 | 21.605  | 1.00       | 45.46 |      | O0 |
| HETATM16349 | O HOH A 510   | -41.319 | -18.410 | 0.705   | 1.00       | 47.95 |      | O0 |
| HETATM16350 | O HOH A 511   | -37.581 | -12.067 | 39.410  | 1.00       | 48.52 |      | O0 |
| HETATM16351 | O HOH A 512   | -40.142 | -21.739 | 43.418  | 1.00       | 53.78 |      | O0 |
| HETATM16352 | O HOH A 513   | -32.392 | -27.714 | 15.016  | 1.00       | 53.67 |      | O0 |
| HETATM16353 | O HOH A 514   | -39.506 | -31.696 | 28.020  | 1.00       | 44.09 |      | O0 |
| HETATM16354 | O HOH A 515   | -43.202 | -16.769 | 37.171  | 1.00       | 37.50 |      | O0 |
| HETATM16355 | O HOH A 516   | -48.146 | -28.225 | 25.075  | 1.00       | 45.81 |      | O0 |
| HETATM16356 | O HOH A 517   | -39.339 | -7.691  | 30.060  | 1.00       | 54.46 |      | O0 |
| HETATM16357 | O HOH A 518   | -24.056 | -9.526  | 17.388  | 1.00       | 52.90 |      | O0 |
| HETATM16358 | O HOH A 519   | -42.161 | -8.539  | 6.200   | 1.00       | 57.85 |      | O0 |
| HETATM16359 | O HOH A 520   | -47.973 | -31.845 | 11.276  | 1.00       | 57.35 |      | O0 |
| HETATM16360 | O HOH A 521   | -28.575 | -14.524 | 14.924  | 1.00       | 33.80 |      | O0 |
| HETATM16361 | O HOH A 522   | -36.255 | -30.858 | 39.499  | 1.00       | 46.10 |      | O0 |
| HETATM16362 | O HOH A 523   | -24.076 | -15.045 | -1.051  | 1.00       | 36.74 |      | O0 |
| HETATM16363 | O HOH A 524   | -42.689 | -23.736 | 32.709  | 1.00       | 40.28 |      | O0 |
| HETATM16364 | O HOH A 525   | -43.797 | -32.794 | 9.338   | 1.00       | 51.88 |      | O0 |
| HETATM16365 | O HOH A 526   | -32.373 | -8.830  | 2.942   | 1.00       | 49.82 |      | O0 |
| HETATM16366 | O HOH A 527   | -25.662 | -13.909 | 0.958   | 1.00       | 42.94 |      | O0 |
| HETATM16367 | O HOH A 528   | -36.805 | -30.243 | 9.692   | 1.00       | 42.42 |      | O0 |
| HETATM16368 | O HOH A 529   | -55.941 | -25.536 | 18.587  | 1.00       | 42.68 |      | O0 |
| HETATM16369 | O HOH A 530   | -33.831 | -22.698 | -7.208  | 1.00       | 38.12 |      | O0 |
| HETATM16370 | O HOH A 531   | -25.679 | -7.145  | -3.811  | 1.00       | 44.51 |      | O0 |
| HETATM16371 | O HOH A 532   | -52.839 | -21.257 | 11.942  | 1.00       | 47.66 |      | O0 |
| HETATM16372 | O HOH A 533   | -35.848 | -19.735 | 15.802  | 1.00       | 52.57 |      | O0 |
| HETATM16373 | O HOH A 534   | -37.524 | -13.253 | 7.653   | 1.00       | 48.07 |      | O0 |
| HETATM16374 | O HOH A 535   | -40.552 | -27.072 | 2.669   | 1.00       | 51.91 |      | O0 |
| HETATM16375 | O HOH A 536   | -23.243 | -13.420 | 3.261   | 1.00       | 48.22 |      | O0 |
| HETATM16376 | O HOH A 537   | -18.505 | -17.894 | 29.830  | 1.00       | 46.52 |      | O0 |
| HETATM16377 | O HOH A 538   | -33.845 | -24.520 | 46.182  | 1.00       | 40.28 |      | O0 |
| HETATM16378 | O HOH A 539   | -37.014 | -17.147 | 21.796  | 1.00       | 35.41 |      | O0 |
| HETATM16379 | O HOH A 540   | -39.577 | -15.834 | 15.898  | 1.00       | 36.90 |      | O0 |
| HETATM16380 | O HOH A 541   | -38.281 | -27.148 | 39.915  | 1.00       | 48.67 |      | O0 |
| HETATM16381 | O HOH A 542   | -21.195 | -23.892 | 35.146  | 1.00       | 46.37 |      | O0 |
| HETATM16382 | O HOH A 543   | -36.533 | -25.968 | -6.978  | 1.00       | 34.27 |      | O0 |

|             |   |           |         |         |         |      |       |    |
|-------------|---|-----------|---------|---------|---------|------|-------|----|
| HETATM16383 | O | HOH A 544 | -22.995 | -21.342 | 42.872  | 1.00 | 47.77 | OO |
| HETATM16384 | O | HOH A 545 | -38.391 | -28.772 | 6.258   | 1.00 | 37.82 | OO |
| HETATM16385 | O | HOH A 546 | -40.056 | -15.240 | 19.301  | 1.00 | 41.48 | OO |
| HETATM16386 | O | HOH A 547 | -23.293 | -27.986 | 33.840  | 1.00 | 48.49 | OO |
| HETATM16387 | O | HOH A 548 | -24.454 | -26.638 | 26.148  | 1.00 | 48.19 | OO |
| HETATM16388 | O | HOH A 549 | -32.700 | -14.472 | -12.295 | 1.00 | 52.12 | OO |
| HETATM16389 | O | HOH A 550 | -29.911 | -7.114  | -4.137  | 1.00 | 51.89 | OO |
| HETATM16390 | O | HOH A 551 | -37.390 | -21.988 | -7.529  | 1.00 | 44.35 | OO |
| HETATM16391 | O | HOH A 552 | -26.840 | -9.926  | 33.976  | 1.00 | 50.95 | OO |
| HETATM16392 | O | HOH A 553 | -45.746 | -24.940 | 15.862  | 1.00 | 41.42 | OO |
| HETATM16393 | O | HOH A 554 | -39.579 | -22.822 | 46.176  | 1.00 | 52.14 | OO |
| HETATM16394 | O | HOH A 555 | -23.607 | -34.028 | -16.219 | 1.00 | 44.23 | OO |
| HETATM16395 | O | HOH A 556 | -21.777 | -27.711 | 17.620  | 1.00 | 53.47 | OO |
| HETATM16396 | O | HOH A 557 | -39.884 | -14.611 | 7.695   | 1.00 | 32.42 | OO |
| HETATM16397 | O | HOH A 558 | -47.986 | -25.816 | 14.606  | 1.00 | 35.24 | OO |
| HETATM16398 | O | HOH A 559 | -27.581 | -19.320 | 11.341  | 1.00 | 49.03 | OO |
| HETATM16399 | O | HOH A 560 | -39.618 | -27.582 | 0.069   | 1.00 | 47.59 | OO |
| HETATM16400 | O | HOH A 561 | -27.447 | -29.578 | -3.879  | 1.00 | 48.88 | OO |
| HETATM16401 | O | HOH A 562 | -29.493 | -34.775 | 40.663  | 1.00 | 56.53 | OO |
| HETATM16402 | O | HOH A 563 | -29.066 | -15.353 | -9.895  | 1.00 | 49.47 | OO |
| HETATM16403 | O | HOH A 564 | -59.574 | -18.560 | 16.470  | 1.00 | 54.82 | OO |
| HETATM16404 | O | HOH A 565 | -42.496 | -23.571 | 42.221  | 1.00 | 49.68 | OO |
| HETATM16405 | O | HOH A 566 | -45.210 | -16.738 | 8.275   | 1.00 | 38.30 | OO |
| HETATM16406 | O | HOH A 567 | -24.811 | -32.090 | 31.616  | 1.00 | 60.34 | OO |
| HETATM16407 | O | HOH A 568 | -58.425 | -16.918 | 18.088  | 1.00 | 58.09 | OO |
| HETATM16408 | O | HOH A 569 | -44.243 | -28.764 | -4.268  | 1.00 | 50.15 | OO |
| HETATM16409 | O | HOH A 570 | -24.730 | -17.419 | 37.062  | 1.00 | 40.80 | OO |
| HETATM16410 | O | HOH A 571 | -36.075 | -33.323 | -5.336  | 1.00 | 45.45 | OO |
| HETATM16411 | O | HOH A 572 | -27.252 | -8.816  | 12.377  | 1.00 | 46.25 | OO |
| HETATM16412 | O | HOH A 573 | -40.174 | -15.877 | 22.061  | 1.00 | 40.81 | OO |
| HETATM16413 | O | HOH A 574 | -49.659 | -26.455 | 26.147  | 1.00 | 47.68 | OO |
| HETATM16414 | O | HOH A 575 | -40.681 | -29.265 | 5.122   | 1.00 | 50.56 | OO |
| HETATM16415 | O | HOH A 576 | -39.427 | -32.969 | 11.368  | 1.00 | 58.59 | OO |
| HETATM16416 | O | HOH A 577 | -21.711 | -16.954 | 2.065   | 1.00 | 41.88 | OO |
| HETATM16417 | O | HOH A 578 | -44.523 | -29.809 | 34.697  | 1.00 | 59.28 | OO |
| HETATM16418 | O | HOH A 579 | -41.339 | -25.164 | 34.577  | 1.00 | 33.02 | OO |
| HETATM16419 | O | HOH A 580 | -20.320 | -20.992 | 27.344  | 1.00 | 45.90 | OO |
| HETATM16420 | O | HOH A 581 | -46.657 | -21.135 | -0.438  | 1.00 | 54.28 | OO |
| HETATM16421 | O | HOH A 582 | -16.924 | -22.689 | 29.868  | 1.00 | 57.49 | OO |
| HETATM16422 | O | HOH A 583 | -22.361 | -16.921 | 28.144  | 1.00 | 46.80 | OO |
| HETATM16423 | O | HOH A 584 | -42.315 | -4.246  | 21.565  | 1.00 | 40.36 | OO |
| HETATM16424 | O | HOH A 585 | -40.235 | -12.913 | -4.879  | 1.00 | 63.66 | OO |
| HETATM16425 | O | HOH A 586 | -25.047 | -22.864 | -9.854  | 1.00 | 56.39 | OO |
| HETATM16426 | O | HOH A 587 | -43.166 | -16.247 | 9.765   | 1.00 | 42.41 | OO |
| HETATM16427 | O | HOH A 588 | -28.298 | -17.409 | 13.350  | 1.00 | 45.50 | OO |
| HETATM16428 | O | HOH A 589 | -34.227 | -32.787 | 32.028  | 1.00 | 59.45 | OO |
| HETATM16429 | O | HOH A 590 | -24.428 | -27.720 | 17.935  | 1.00 | 56.62 | OO |
| HETATM16430 | O | HOH A 591 | -19.523 | -13.724 | -5.486  | 1.00 | 57.54 | OO |
| HETATM16431 | O | HOH A 592 | -31.002 | -9.879  | 8.460   | 1.00 | 49.54 | OO |
| HETATM16432 | O | HOH A 593 | -59.376 | -27.443 | 23.973  | 1.00 | 57.87 | OO |
| HETATM16433 | O | HOH A 594 | -25.336 | -17.028 | 44.304  | 1.00 | 65.25 | OO |
| HETATM16434 | O | HOH A 595 | -43.952 | -13.962 | 7.615   | 1.00 | 59.02 | OO |
| HETATM16435 | O | HOH A 596 | -42.863 | -11.661 | 0.918   | 1.00 | 52.97 | OO |
| HETATM16436 | O | HOH A 597 | -28.655 | -28.105 | 26.030  | 1.00 | 53.02 | OO |

|             |   |           |         |         |        |      |       |    |
|-------------|---|-----------|---------|---------|--------|------|-------|----|
| HETATM16437 | O | HOH A 598 | -35.377 | -16.865 | 16.586 | 1.00 | 58.26 | O0 |
| HETATM16438 | O | HOH A 599 | -48.142 | -17.334 | 4.232  | 1.00 | 49.54 | O0 |
| HETATM16439 | O | HOH A 600 | -34.354 | -6.039  | 6.717  | 1.00 | 63.90 | O0 |
| HETATM16440 | O | HOH A 601 | -44.837 | -22.186 | 32.627 | 1.00 | 40.70 | O0 |
| HETATM16441 | O | HOH A 602 | -33.647 | -8.035  | 0.852  | 1.00 | 59.93 | O0 |
| HETATM16442 | O | HOH A 603 | -37.380 | -15.958 | 19.199 | 1.00 | 43.62 | O0 |
| HETATM16443 | O | HOH A 604 | -36.589 | -30.664 | 6.073  | 1.00 | 55.58 | O0 |
| HETATM16444 | O | HOH A 605 | -42.344 | -22.140 | -1.757 | 1.00 | 51.07 | O0 |
| HETATM16445 | O | HOH A 606 | -35.759 | -9.789  | 9.673  | 1.00 | 48.60 | O0 |
| HETATM16446 | O | HOH A 607 | -20.293 | -18.449 | 27.541 | 1.00 | 49.53 | O0 |
| HETATM16447 | O | HOH A 608 | -20.985 | -26.439 | 34.423 | 1.00 | 47.83 | O0 |
| HETATM16448 | O | HOH A 609 | -33.208 | -9.085  | 10.081 | 1.00 | 48.81 | O0 |
| HETATM16449 | O | HOH A 610 | -58.306 | -19.177 | 14.401 | 1.00 | 59.77 | O0 |
| HETATM16450 | O | HOH A 611 | -38.747 | -9.706  | -0.357 | 1.00 | 53.73 | O0 |
| HETATM16451 | O | HOH B 501 | -45.453 | -5.540  | 5.401  | 1.00 | 41.67 | O0 |
| HETATM16452 | O | HOH B 502 | -57.264 | -20.725 | 22.943 | 1.00 | 44.12 | O0 |
| HETATM16453 | O | HOH B 503 | -62.006 | 2.925   | 21.071 | 1.00 | 34.52 | O0 |
| HETATM16454 | O | HOH B 504 | -48.771 | -5.480  | 49.347 | 1.00 | 46.99 | O0 |
| HETATM16455 | O | HOH B 505 | -56.743 | -4.532  | 8.574  | 1.00 | 44.37 | O0 |
| HETATM16456 | O | HOH B 506 | -62.582 | -18.548 | 4.730  | 1.00 | 49.23 | O0 |
| HETATM16457 | O | HOH B 507 | -48.328 | 2.900   | 9.348  | 1.00 | 58.15 | O0 |
| HETATM16458 | O | HOH B 508 | -58.650 | 0.597   | 4.542  | 1.00 | 57.82 | O0 |
| HETATM16459 | O | HOH B 509 | -57.718 | -13.939 | 31.790 | 1.00 | 43.21 | O0 |
| HETATM16460 | O | HOH B 510 | -46.056 | -14.576 | 25.939 | 1.00 | 47.94 | O0 |
| HETATM16461 | O | HOH B 511 | -70.656 | 4.919   | 21.279 | 1.00 | 44.81 | O0 |
| HETATM16462 | O | HOH B 512 | -54.080 | -18.829 | 47.913 | 1.00 | 47.56 | O0 |
| HETATM16463 | O | HOH B 513 | -64.337 | -15.542 | 9.506  | 1.00 | 55.82 | O0 |
| HETATM16464 | O | HOH B 514 | -47.479 | -16.972 | 49.085 | 1.00 | 48.90 | O0 |
| HETATM16465 | O | HOH B 515 | -53.478 | -13.053 | 49.676 | 1.00 | 39.76 | O0 |
| HETATM16466 | O | HOH B 516 | -54.269 | 2.645   | 13.252 | 1.00 | 39.43 | O0 |
| HETATM16467 | O | HOH B 517 | -55.385 | -3.424  | 5.822  | 1.00 | 44.12 | O0 |
| HETATM16468 | O | HOH B 518 | -50.422 | -18.823 | 39.597 | 1.00 | 33.40 | O0 |
| HETATM16469 | O | HOH B 519 | -62.474 | -11.349 | 45.423 | 1.00 | 44.23 | O0 |
| HETATM16470 | O | HOH B 520 | -52.520 | 0.357   | 47.238 | 1.00 | 43.91 | O0 |
| HETATM16471 | O | HOH B 521 | -61.606 | 10.919  | 16.228 | 1.00 | 53.02 | O0 |
| HETATM16472 | O | HOH B 522 | -65.421 | -14.106 | 34.797 | 1.00 | 60.98 | O0 |
| HETATM16473 | O | HOH B 523 | -47.669 | -10.443 | 17.925 | 1.00 | 34.54 | O0 |
| HETATM16474 | O | HOH B 524 | -69.755 | -1.853  | 12.399 | 1.00 | 45.30 | O0 |
| HETATM16475 | O | HOH B 525 | -47.279 | -16.143 | 46.521 | 1.00 | 45.67 | O0 |
| HETATM16476 | O | HOH B 526 | -51.062 | 6.564   | 31.520 | 1.00 | 36.79 | O0 |
| HETATM16477 | O | HOH B 527 | -64.584 | -3.829  | 33.966 | 1.00 | 46.89 | O0 |
| HETATM16478 | O | HOH B 528 | -71.166 | 8.143   | 29.013 | 1.00 | 58.14 | O0 |
| HETATM16479 | O | HOH B 529 | -50.292 | 4.283   | 40.227 | 1.00 | 39.17 | O0 |
| HETATM16480 | O | HOH B 530 | -45.253 | -19.842 | 33.275 | 1.00 | 40.50 | O0 |
| HETATM16481 | O | HOH B 531 | -65.152 | -5.977  | 12.181 | 1.00 | 39.93 | O0 |
| HETATM16482 | O | HOH B 532 | -67.528 | -0.149  | 8.912  | 1.00 | 50.73 | O0 |
| HETATM16483 | O | HOH B 533 | -48.024 | -8.866  | 47.056 | 1.00 | 54.03 | O0 |
| HETATM16484 | O | HOH B 534 | -70.117 | -1.604  | 15.642 | 1.00 | 57.05 | O0 |
| HETATM16485 | O | HOH B 535 | -42.174 | -8.871  | 18.638 | 1.00 | 43.12 | O0 |
| HETATM16486 | O | HOH B 536 | -49.187 | -19.534 | 31.504 | 1.00 | 48.46 | O0 |
| HETATM16487 | O | HOH B 537 | -63.905 | 4.792   | 19.570 | 1.00 | 33.90 | O0 |
| HETATM16488 | O | HOH B 538 | -57.866 | -0.084  | 39.055 | 1.00 | 34.00 | O0 |
| HETATM16489 | O | HOH B 539 | -42.645 | -27.382 | 35.002 | 1.00 | 55.90 | O0 |
| HETATM16490 | O | HOH B 540 | -46.771 | 5.426   | 41.298 | 1.00 | 42.56 | O0 |

|             |   |           |         |         |        |      |       |    |
|-------------|---|-----------|---------|---------|--------|------|-------|----|
| HETATM16491 | O | HOH B 541 | -59.329 | -21.296 | 11.981 | 1.00 | 50.60 | O0 |
| HETATM16492 | O | HOH B 542 | -42.492 | -4.315  | 29.755 | 1.00 | 46.91 | O0 |
| HETATM16493 | O | HOH B 543 | -51.422 | -2.537  | 25.315 | 1.00 | 39.83 | O0 |
| HETATM16494 | O | HOH B 544 | -52.051 | 0.254   | 10.640 | 1.00 | 35.94 | O0 |
| HETATM16495 | O | HOH B 545 | -65.267 | -7.629  | 15.775 | 1.00 | 42.66 | O0 |
| HETATM16496 | O | HOH B 546 | -49.622 | -3.746  | 2.594  | 1.00 | 45.99 | O0 |
| HETATM16497 | O | HOH B 547 | -51.572 | 4.912   | 10.280 | 1.00 | 46.64 | O0 |
| HETATM16498 | O | HOH B 548 | -62.881 | -8.795  | 38.308 | 1.00 | 46.79 | O0 |
| HETATM16499 | O | HOH B 549 | -57.578 | 1.801   | 37.011 | 1.00 | 35.93 | O0 |
| HETATM16500 | O | HOH B 550 | -55.937 | 4.459   | 11.936 | 1.00 | 42.18 | O0 |
| HETATM16501 | O | HOH B 551 | -68.097 | -9.386  | -1.548 | 1.00 | 52.36 | O0 |
| HETATM16502 | O | HOH B 552 | -43.496 | 0.479   | 41.184 | 1.00 | 42.69 | O0 |
| HETATM16503 | O | HOH B 553 | -49.759 | -22.560 | 42.899 | 1.00 | 55.33 | O0 |
| HETATM16504 | O | HOH B 554 | -53.936 | -2.760  | 17.766 | 1.00 | 49.04 | O0 |
| HETATM16505 | O | HOH B 555 | -60.057 | -14.004 | -5.406 | 1.00 | 55.72 | O0 |
| HETATM16506 | O | HOH B 556 | -51.896 | -0.125  | 19.076 | 1.00 | 42.88 | O0 |
| HETATM16507 | O | HOH B 557 | -42.205 | -9.857  | 14.439 | 1.00 | 42.24 | O0 |
| HETATM16508 | O | HOH B 558 | -51.572 | -20.344 | 5.215  | 1.00 | 44.83 | O0 |
| HETATM16509 | O | HOH B 559 | -55.201 | -17.955 | 38.844 | 1.00 | 33.44 | O0 |
| HETATM16510 | O | HOH B 560 | -50.759 | 0.853   | 22.412 | 1.00 | 40.19 | O0 |
| HETATM16511 | O | HOH B 561 | -49.887 | -1.387  | 10.387 | 1.00 | 45.23 | O0 |
| HETATM16512 | O | HOH B 562 | -64.842 | 13.332  | 12.871 | 1.00 | 49.92 | O0 |
| HETATM16513 | O | HOH B 563 | -64.495 | -9.879  | 42.226 | 1.00 | 49.98 | O0 |
| HETATM16514 | O | HOH B 564 | -64.140 | -9.947  | 14.855 | 1.00 | 58.34 | O0 |
| HETATM16515 | O | HOH B 565 | -45.870 | -9.949  | -2.116 | 1.00 | 61.99 | O0 |
| HETATM16516 | O | HOH B 566 | -57.937 | -2.972  | 44.525 | 1.00 | 44.86 | O0 |
| HETATM16517 | O | HOH B 567 | -45.177 | -13.475 | 40.231 | 1.00 | 40.92 | O0 |
| HETATM16518 | O | HOH B 568 | -53.151 | -5.748  | 50.531 | 1.00 | 34.28 | O0 |
| HETATM16519 | O | HOH B 569 | -55.733 | -17.130 | 31.252 | 1.00 | 39.12 | O0 |
| HETATM16520 | O | HOH B 570 | -58.874 | -5.993  | 51.097 | 1.00 | 52.62 | O0 |
| HETATM16521 | O | HOH B 571 | -57.795 | -17.928 | 23.436 | 1.00 | 46.32 | O0 |
| HETATM16522 | O | HOH B 572 | -54.200 | -20.835 | 41.894 | 1.00 | 50.04 | O0 |
| HETATM16523 | O | HOH B 573 | -49.771 | -18.376 | 5.953  | 1.00 | 41.50 | O0 |
| HETATM16524 | O | HOH B 574 | -42.486 | -3.976  | 32.448 | 1.00 | 52.02 | O0 |
| HETATM16525 | O | HOH B 575 | -39.683 | -9.545  | 36.061 | 1.00 | 52.70 | O0 |
| HETATM16526 | O | HOH B 576 | -49.095 | -22.718 | 34.199 | 1.00 | 48.84 | O0 |
| HETATM16527 | O | HOH B 577 | -63.678 | 3.078   | 3.443  | 1.00 | 64.51 | O0 |
| HETATM16528 | O | HOH B 578 | -70.344 | 10.928  | 28.359 | 1.00 | 52.54 | O0 |
| HETATM16529 | O | HOH B 579 | -40.893 | -12.891 | 19.333 | 1.00 | 41.21 | O0 |
| HETATM16530 | O | HOH B 580 | -55.174 | 2.575   | 46.138 | 1.00 | 43.63 | O0 |
| HETATM16531 | O | HOH B 581 | -61.134 | -10.428 | 20.655 | 1.00 | 52.23 | O0 |
| HETATM16532 | O | HOH B 582 | -47.965 | -16.562 | 25.630 | 1.00 | 36.26 | O0 |
| HETATM16533 | O | HOH B 583 | -45.558 | -16.155 | 31.484 | 1.00 | 38.10 | O0 |
| HETATM16534 | O | HOH B 584 | -52.277 | -13.027 | 15.538 | 1.00 | 39.12 | O0 |
| HETATM16535 | O | HOH B 585 | -64.139 | -3.446  | 5.561  | 1.00 | 54.74 | O0 |
| HETATM16536 | O | HOH B 586 | -69.973 | -4.629  | 27.549 | 1.00 | 55.61 | O0 |
| HETATM16537 | O | HOH B 587 | -50.179 | -11.729 | 16.945 | 1.00 | 42.94 | O0 |
| HETATM16538 | O | HOH B 588 | -46.818 | -4.695  | 47.313 | 1.00 | 56.01 | O0 |
| HETATM16539 | O | HOH B 589 | -58.479 | 17.931  | 21.224 | 1.00 | 51.94 | O0 |
| HETATM16540 | O | HOH B 590 | -63.608 | -17.784 | 34.793 | 1.00 | 59.34 | O0 |
| HETATM16541 | O | HOH B 591 | -50.857 | 1.083   | 25.178 | 1.00 | 30.74 | O0 |
| HETATM16542 | O | HOH B 592 | -52.259 | 3.366   | 3.536  | 1.00 | 46.17 | O0 |
| HETATM16543 | O | HOH B 593 | -63.095 | -0.687  | 3.714  | 1.00 | 56.37 | O0 |
| HETATM16544 | O | HOH B 594 | -50.728 | 4.951   | 27.612 | 1.00 | 58.86 | O0 |

|             |   |           |         |         |        |      |       |    |
|-------------|---|-----------|---------|---------|--------|------|-------|----|
| HETATM16545 | O | HOH B 595 | -53.675 | 8.497   | 28.910 | 1.00 | 37.31 | O0 |
| HETATM16546 | O | HOH B 596 | -56.336 | -22.298 | 8.284  | 1.00 | 52.86 | O0 |
| HETATM16547 | O | HOH B 597 | -44.220 | -8.692  | 43.093 | 1.00 | 50.22 | O0 |
| HETATM16548 | O | HOH B 598 | -66.338 | -10.558 | 31.235 | 1.00 | 50.52 | O0 |
| HETATM16549 | O | HOH B 599 | -55.787 | -20.628 | 12.395 | 1.00 | 61.85 | O0 |
| HETATM16550 | O | HOH B 600 | -72.129 | 6.545   | 20.060 | 1.00 | 50.71 | O0 |
| HETATM16551 | O | HOH B 601 | -45.059 | -6.790  | 10.874 | 1.00 | 43.43 | O0 |
| HETATM16552 | O | HOH B 602 | -45.917 | -19.741 | 43.352 | 1.00 | 45.46 | O0 |
| HETATM16553 | O | HOH B 603 | -61.521 | -20.358 | 7.392  | 1.00 | 62.15 | O0 |
| HETATM16554 | O | HOH B 604 | -60.003 | -13.454 | 30.700 | 1.00 | 57.37 | O0 |
| HETATM16555 | O | HOH B 605 | -49.666 | -3.092  | 16.708 | 1.00 | 53.16 | O0 |
| HETATM16556 | O | HOH B 606 | -67.309 | -4.887  | 7.238  | 1.00 | 53.79 | O0 |
| HETATM16557 | O | HOH B 607 | -58.027 | 6.857   | 8.125  | 1.00 | 45.39 | O0 |
| HETATM16558 | O | HOH B 608 | -44.872 | -27.076 | 33.207 | 1.00 | 57.65 | O0 |
| HETATM16559 | O | HOH B 609 | -56.566 | 4.217   | 36.611 | 1.00 | 42.04 | O0 |
| HETATM16560 | O | HOH B 610 | -50.813 | -2.039  | 22.516 | 1.00 | 41.68 | O0 |
| HETATM16561 | O | HOH B 611 | -48.083 | 0.185   | 9.186  | 1.00 | 56.93 | O0 |
| HETATM16562 | O | HOH B 612 | -49.366 | 4.465   | 11.770 | 1.00 | 55.74 | O0 |
| HETATM16563 | O | HOH B 613 | -48.748 | -1.975  | 12.563 | 1.00 | 43.91 | O0 |
| HETATM16564 | O | HOH B 614 | -61.017 | 20.301  | 18.405 | 1.00 | 49.16 | O0 |
| HETATM16565 | O | HOH B 615 | -53.172 | -19.657 | 39.132 | 1.00 | 47.00 | O0 |
| HETATM16566 | O | HOH B 616 | -57.876 | 4.533   | 33.906 | 1.00 | 50.36 | O0 |
| HETATM16567 | O | HOH B 617 | -46.420 | -18.673 | 31.185 | 1.00 | 36.28 | O0 |
| HETATM16568 | O | HOH B 618 | -44.577 | -4.567  | 12.526 | 1.00 | 53.33 | O0 |
| HETATM16569 | O | HOH C 501 | -37.871 | 31.011  | 25.100 | 1.00 | 51.70 | O0 |
| HETATM16570 | O | HOH C 502 | -43.921 | 18.413  | 18.336 | 1.00 | 49.09 | O0 |
| HETATM16571 | O | HOH C 503 | -50.594 | 7.487   | -7.898 | 1.00 | 45.17 | O0 |
| HETATM16572 | O | HOH C 504 | -42.407 | 27.071  | 4.146  | 1.00 | 59.23 | O0 |
| HETATM16573 | O | HOH C 505 | -47.428 | 18.637  | 6.565  | 1.00 | 57.13 | O0 |
| HETATM16574 | O | HOH C 506 | -48.866 | 2.669   | 26.243 | 1.00 | 45.39 | O0 |
| HETATM16575 | O | HOH C 507 | -53.215 | 18.536  | 34.204 | 1.00 | 49.06 | O0 |
| HETATM16576 | O | HOH C 508 | -41.181 | 28.058  | 20.336 | 1.00 | 48.03 | O0 |
| HETATM16577 | O | HOH C 509 | -43.291 | 4.895   | 40.272 | 1.00 | 43.87 | O0 |
| HETATM16578 | O | HOH C 510 | -31.126 | 19.013  | 43.849 | 1.00 | 44.93 | O0 |
| HETATM16579 | O | HOH C 511 | -40.810 | 17.567  | 19.253 | 1.00 | 50.31 | O0 |
| HETATM16580 | O | HOH C 512 | -29.570 | 12.143  | 39.234 | 1.00 | 47.72 | O0 |
| HETATM16581 | O | HOH C 513 | -48.401 | 19.333  | 9.520  | 1.00 | 49.24 | O0 |
| HETATM16582 | O | HOH C 514 | -30.471 | 16.129  | 39.609 | 1.00 | 44.96 | O0 |
| HETATM16583 | O | HOH C 515 | -46.089 | 28.940  | 34.239 | 1.00 | 43.34 | O0 |
| HETATM16584 | O | HOH C 516 | -51.843 | 27.351  | 13.496 | 1.00 | 51.73 | O0 |
| HETATM16585 | O | HOH C 517 | -60.611 | 15.603  | 26.656 | 1.00 | 55.12 | O0 |
| HETATM16586 | O | HOH C 518 | -32.450 | 18.524  | 39.123 | 1.00 | 46.18 | O0 |
| HETATM16587 | O | HOH C 519 | -40.426 | 26.629  | 42.892 | 1.00 | 52.58 | O0 |
| HETATM16588 | O | HOH C 520 | -42.621 | 36.946  | 20.212 | 1.00 | 47.97 | O0 |
| HETATM16589 | O | HOH C 521 | -33.008 | 11.137  | 40.793 | 1.00 | 47.05 | O0 |
| HETATM16590 | O | HOH C 522 | -59.162 | 7.390   | -5.985 | 1.00 | 42.47 | O0 |
| HETATM16591 | O | HOH C 523 | -60.594 | 23.253  | 13.016 | 1.00 | 47.26 | O0 |
| HETATM16592 | O | HOH C 524 | -61.733 | 9.583   | 9.357  | 1.00 | 41.42 | O0 |
| HETATM16593 | O | HOH C 525 | -50.657 | 5.392   | 45.396 | 1.00 | 52.30 | O0 |
| HETATM16594 | O | HOH C 526 | -36.018 | 19.575  | 46.782 | 1.00 | 37.19 | O0 |
| HETATM16595 | O | HOH C 527 | -30.345 | 18.311  | 47.530 | 1.00 | 48.78 | O0 |
| HETATM16596 | O | HOH C 528 | -56.503 | 8.465   | -4.141 | 1.00 | 45.43 | O0 |
| HETATM16597 | O | HOH C 529 | -36.939 | 28.997  | 7.901  | 1.00 | 50.56 | O0 |
| HETATM16598 | O | HOH C 530 | -38.342 | 34.550  | 5.344  | 1.00 | 57.79 | O0 |

|             |   |           |         |        |        |      |       |    |
|-------------|---|-----------|---------|--------|--------|------|-------|----|
| HETATM16599 | O | HOH C 531 | -41.086 | 23.679 | 44.856 | 1.00 | 49.20 | OO |
| HETATM16600 | O | HOH C 532 | -39.537 | 11.005 | 47.318 | 1.00 | 37.99 | OO |
| HETATM16601 | O | HOH C 533 | -48.918 | 14.139 | -7.098 | 1.00 | 50.08 | OO |
| HETATM16602 | O | HOH C 534 | -47.656 | 16.611 | 51.482 | 1.00 | 50.90 | OO |
| HETATM16603 | O | HOH C 535 | -39.936 | 19.712 | 12.893 | 1.00 | 38.62 | OO |
| HETATM16604 | O | HOH C 536 | -57.404 | 12.354 | 40.482 | 1.00 | 56.10 | OO |
| HETATM16605 | O | HOH C 537 | -48.875 | 2.710  | 22.131 | 1.00 | 41.09 | OO |
| HETATM16606 | O | HOH C 538 | -40.023 | 11.584 | 51.138 | 1.00 | 43.92 | OO |
| HETATM16607 | O | HOH C 539 | -54.150 | 5.291  | 36.852 | 1.00 | 34.83 | OO |
| HETATM16608 | O | HOH C 540 | -48.720 | 9.179  | 49.021 | 1.00 | 39.06 | OO |
| HETATM16609 | O | HOH C 541 | -50.996 | 7.344  | 29.050 | 1.00 | 46.86 | OO |
| HETATM16610 | O | HOH C 542 | -58.053 | 17.471 | 26.528 | 1.00 | 51.38 | OO |
| HETATM16611 | O | HOH C 543 | -45.818 | 7.884  | 6.847  | 1.00 | 48.17 | OO |
| HETATM16612 | O | HOH C 544 | -32.137 | 31.722 | 14.747 | 1.00 | 58.54 | OO |
| HETATM16613 | O | HOH C 545 | -41.612 | 16.141 | 25.637 | 1.00 | 42.67 | OO |
| HETATM16614 | O | HOH C 546 | -34.751 | 23.192 | 44.895 | 1.00 | 50.43 | OO |
| HETATM16615 | O | HOH C 547 | -32.419 | 34.916 | 20.652 | 1.00 | 59.84 | OO |
| HETATM16616 | O | HOH C 548 | -55.436 | 9.061  | 35.134 | 1.00 | 44.54 | OO |
| HETATM16617 | O | HOH C 549 | -59.358 | 5.884  | 38.169 | 1.00 | 48.66 | OO |
| HETATM16618 | O | HOH C 550 | -37.599 | 17.371 | 9.616  | 1.00 | 51.04 | OO |
| HETATM16619 | O | HOH C 551 | -41.729 | 17.008 | 10.853 | 1.00 | 47.01 | OO |
| HETATM16620 | O | HOH C 552 | -35.289 | 39.902 | 19.002 | 1.00 | 52.80 | OO |
| HETATM16621 | O | HOH C 553 | -60.741 | 20.467 | 15.787 | 1.00 | 63.36 | OO |
| HETATM16622 | O | HOH C 554 | -58.803 | 10.952 | 36.958 | 1.00 | 57.52 | OO |
| HETATM16623 | O | HOH C 555 | -54.805 | 15.609 | 41.901 | 1.00 | 41.60 | OO |
| HETATM16624 | O | HOH C 556 | -56.829 | 26.062 | 9.616  | 1.00 | 60.24 | OO |
| HETATM16625 | O | HOH C 557 | -45.607 | 5.275  | 20.487 | 1.00 | 52.13 | OO |
| HETATM16626 | O | HOH C 558 | -64.654 | 21.427 | 3.510  | 1.00 | 61.19 | OO |
| HETATM16627 | O | HOH C 559 | -48.737 | 6.353  | 40.015 | 1.00 | 48.27 | OO |
| HETATM16628 | O | HOH C 560 | -53.734 | 11.011 | 42.924 | 1.00 | 38.54 | OO |
| HETATM16629 | O | HOH C 561 | -40.314 | 30.415 | 18.867 | 1.00 | 46.73 | OO |
| HETATM16630 | O | HOH C 562 | -52.999 | 22.321 | 22.275 | 1.00 | 40.30 | OO |
| HETATM16631 | O | HOH C 563 | -49.015 | 33.883 | 29.019 | 1.00 | 51.61 | OO |
| HETATM16632 | O | HOH C 564 | -54.527 | 6.149  | 0.192  | 1.00 | 51.79 | OO |
| HETATM16633 | O | HOH C 565 | -30.190 | 9.483  | 20.911 | 1.00 | 54.90 | OO |
| HETATM16634 | O | HOH C 566 | -42.655 | 14.269 | 10.803 | 1.00 | 49.11 | OO |
| HETATM16635 | O | HOH C 567 | -32.134 | 19.514 | 30.248 | 1.00 | 42.43 | OO |
| HETATM16636 | O | HOH C 568 | -42.220 | 12.456 | 48.277 | 1.00 | 37.69 | OO |
| HETATM16637 | O | HOH C 569 | -31.344 | 10.530 | 45.873 | 1.00 | 51.95 | OO |
| HETATM16638 | O | HOH C 570 | -55.616 | 30.517 | 25.058 | 1.00 | 52.23 | OO |
| HETATM16639 | O | HOH C 571 | -52.761 | 6.831  | 46.249 | 1.00 | 51.05 | OO |
| HETATM16640 | O | HOH C 572 | -52.607 | 27.654 | 17.296 | 1.00 | 48.21 | OO |
| HETATM16641 | O | HOH C 573 | -48.982 | 9.635  | 20.058 | 1.00 | 37.84 | OO |
| HETATM16642 | O | HOH C 574 | -55.472 | 15.884 | 34.307 | 1.00 | 43.16 | OO |
| HETATM16643 | O | HOH C 575 | -62.279 | 13.934 | 16.306 | 1.00 | 61.60 | OO |
| HETATM16644 | O | HOH C 576 | -46.755 | 7.825  | 42.524 | 1.00 | 34.69 | OO |
| HETATM16645 | O | HOH C 577 | -57.958 | 8.003  | 38.387 | 1.00 | 52.40 | OO |
| HETATM16646 | O | HOH C 578 | -34.420 | 11.880 | 48.097 | 1.00 | 37.33 | OO |
| HETATM16647 | O | HOH C 579 | -56.016 | 16.434 | 1.572  | 1.00 | 55.14 | OO |
| HETATM16648 | O | HOH C 580 | -39.146 | 24.285 | 38.715 | 1.00 | 37.92 | OO |
| HETATM16649 | O | HOH C 581 | -37.769 | 24.538 | 36.485 | 1.00 | 49.65 | OO |
| HETATM16650 | O | HOH C 582 | -39.137 | 21.965 | 11.235 | 1.00 | 38.09 | OO |
| HETATM16651 | O | HOH C 583 | -40.409 | 17.285 | 3.469  | 1.00 | 43.54 | OO |
| HETATM16652 | O | HOH C 584 | -63.979 | 17.516 | 16.290 | 1.00 | 41.98 | OO |



|             |   |           |         |        |        |      |       |    |
|-------------|---|-----------|---------|--------|--------|------|-------|----|
| HETATM16653 | O | HOH C 585 | -39.084 | 16.648 | 22.288 | 1.00 | 41.48 | O0 |
| HETATM16654 | O | HOH C 586 | -38.107 | 22.157 | 8.704  | 1.00 | 52.56 | O0 |
| HETATM16655 | O | HOH C 587 | -49.459 | 26.551 | 39.465 | 1.00 | 51.51 | O0 |
| HETATM16656 | O | HOH C 588 | -26.995 | 37.361 | 18.178 | 1.00 | 59.95 | O0 |
| HETATM16657 | O | HOH C 589 | -57.513 | 6.555  | 45.069 | 1.00 | 57.04 | O0 |
| HETATM16658 | O | HOH C 590 | -59.400 | 8.370  | 9.757  | 1.00 | 41.23 | O0 |
| HETATM16659 | O | HOH C 591 | -53.330 | 13.013 | 18.093 | 1.00 | 39.13 | O0 |
| HETATM16660 | O | HOH C 592 | -51.168 | 6.521  | 34.400 | 1.00 | 35.81 | O0 |
| HETATM16661 | O | HOH C 593 | -53.009 | 28.505 | 32.606 | 1.00 | 56.39 | O0 |
| HETATM16662 | O | HOH C 594 | -57.093 | 19.547 | 28.014 | 1.00 | 68.04 | O0 |
| HETATM16663 | O | HOH C 595 | -40.483 | 25.292 | 48.370 | 1.00 | 57.52 | O0 |
| HETATM16664 | O | HOH C 596 | -46.367 | 7.609  | 12.499 | 1.00 | 44.49 | O0 |
| HETATM16665 | O | HOH C 597 | -38.785 | 8.624  | 29.714 | 1.00 | 56.93 | O0 |
| HETATM16666 | O | HOH C 598 | -43.878 | 6.055  | 48.799 | 1.00 | 49.13 | O0 |
| HETATM16667 | O | HOH C 599 | -38.816 | 17.049 | 24.900 | 1.00 | 40.10 | O0 |
| HETATM16668 | O | HOH C 600 | -50.776 | 27.000 | 6.817  | 1.00 | 61.74 | O0 |
| HETATM16669 | O | HOH C 601 | -33.772 | 33.495 | 10.416 | 1.00 | 62.11 | O0 |
| HETATM16670 | O | HOH C 602 | -40.782 | 7.063  | 22.410 | 1.00 | 42.28 | O0 |
| HETATM16671 | O | HOH C 603 | -38.803 | 18.558 | 49.226 | 1.00 | 47.28 | O0 |
| HETATM16672 | O | HOH C 604 | -61.363 | 5.013  | 1.820  | 1.00 | 47.89 | O0 |
| HETATM16673 | O | HOH C 605 | -45.945 | 12.866 | 3.304  | 1.00 | 55.81 | O0 |
| HETATM16674 | O | HOH C 606 | -51.418 | 11.441 | 19.368 | 1.00 | 41.72 | O0 |
| HETATM16675 | O | HOH C 607 | -56.292 | 5.870  | 9.738  | 1.00 | 50.86 | O0 |
| HETATM16676 | O | HOH C 608 | -47.386 | 4.087  | 16.299 | 1.00 | 42.92 | O0 |
| HETATM16677 | O | HOH C 609 | -51.241 | 7.095  | -0.096 | 1.00 | 57.95 | O0 |
| HETATM16678 | O | HOH C 610 | -37.743 | 39.297 | 23.349 | 1.00 | 57.17 | O0 |
| HETATM16679 | O | HOH C 611 | -55.278 | 5.711  | 46.093 | 1.00 | 53.55 | O0 |
| HETATM16680 | O | HOH C 612 | -64.604 | 18.806 | 11.405 | 1.00 | 53.28 | O0 |
| HETATM16681 | O | HOH C 613 | -41.466 | 15.498 | 22.921 | 1.00 | 53.52 | O0 |
| HETATM16682 | O | HOH C 614 | -49.275 | 7.892  | -1.941 | 1.00 | 56.78 | O0 |
| HETATM16683 | O | HOH C 615 | -43.700 | 8.560  | 5.287  | 1.00 | 53.86 | O0 |
| HETATM16684 | O | HOH C 616 | -36.233 | 25.321 | 32.332 | 1.00 | 54.84 | O0 |
| HETATM16685 | O | HOH C 617 | -35.330 | 24.553 | 35.282 | 1.00 | 45.55 | O0 |
| HETATM16686 | O | HOH C 618 | -55.385 | 13.066 | 42.759 | 1.00 | 46.35 | O0 |
| HETATM16687 | O | HOH C 619 | -54.028 | 6.507  | 34.570 | 1.00 | 36.81 | O0 |
| HETATM16688 | O | HOH C 620 | -41.307 | 12.378 | 21.167 | 1.00 | 51.19 | O0 |
| HETATM16689 | O | HOH D 501 | -33.308 | 13.466 | 5.299  | 1.00 | 47.77 | O0 |
| HETATM16690 | O | HOH D 502 | -24.082 | 18.318 | 3.312  | 1.00 | 45.16 | O0 |
| HETATM16691 | O | HOH D 503 | -3.546  | 19.518 | 13.665 | 1.00 | 47.36 | O0 |
| HETATM16692 | O | HOH D 504 | -11.117 | 15.847 | 15.118 | 1.00 | 47.58 | O0 |
| HETATM16693 | O | HOH D 505 | -28.033 | 8.902  | 28.961 | 1.00 | 47.23 | O0 |
| HETATM16694 | O | HOH D 506 | -16.211 | 26.589 | 12.077 | 1.00 | 46.87 | O0 |
| HETATM16695 | O | HOH D 507 | -21.307 | 12.227 | 16.101 | 1.00 | 41.75 | O0 |
| HETATM16696 | O | HOH D 508 | -9.170  | 24.782 | 10.003 | 1.00 | 57.37 | O0 |
| HETATM16697 | O | HOH D 509 | -28.042 | 31.902 | 23.575 | 1.00 | 51.24 | O0 |
| HETATM16698 | O | HOH D 510 | -22.888 | 19.652 | 5.991  | 1.00 | 40.45 | O0 |
| HETATM16699 | O | HOH D 511 | -14.094 | 5.747  | 35.332 | 1.00 | 42.03 | O0 |
| HETATM16700 | O | HOH D 512 | -16.111 | 25.365 | 8.374  | 1.00 | 45.65 | O0 |
| HETATM16701 | O | HOH D 513 | -21.633 | 15.817 | 14.940 | 1.00 | 55.34 | O0 |
| HETATM16702 | O | HOH D 514 | -2.113  | 9.951  | 14.427 | 1.00 | 63.57 | O0 |
| HETATM16703 | O | HOH D 515 | -21.477 | 25.889 | 30.312 | 1.00 | 43.10 | O0 |
| HETATM16704 | O | HOH D 516 | -33.823 | 13.393 | 19.219 | 1.00 | 51.65 | O0 |
| HETATM16705 | O | HOH D 517 | -6.122  | 21.158 | 10.875 | 1.00 | 47.08 | O0 |
| HETATM16706 | O | HOH D 518 | -30.758 | 17.883 | 18.179 | 1.00 | 43.67 | O0 |

|             |   |           |         |        |        |      |       |    |
|-------------|---|-----------|---------|--------|--------|------|-------|----|
| HETATM16707 | O | HOH D 519 | -23.030 | 5.793  | 39.994 | 1.00 | 64.59 | O0 |
| HETATM16708 | O | HOH D 520 | -39.162 | 26.601 | 39.949 | 1.00 | 48.64 | O0 |
| HETATM16709 | O | HOH D 521 | -6.789  | 14.041 | 19.430 | 1.00 | 49.79 | O0 |
| HETATM16710 | O | HOH D 522 | -21.122 | 13.399 | 22.591 | 1.00 | 43.32 | O0 |
| HETATM16711 | O | HOH D 523 | -10.641 | 29.003 | 18.655 | 1.00 | 51.03 | O0 |
| HETATM16712 | O | HOH D 524 | -26.759 | 8.920  | 19.833 | 1.00 | 52.63 | O0 |
| HETATM16713 | O | HOH D 525 | -9.521  | 21.795 | 29.035 | 1.00 | 53.43 | O0 |
| HETATM16714 | O | HOH D 526 | -24.354 | 26.894 | 31.309 | 1.00 | 58.98 | O0 |
| HETATM16715 | O | HOH D 527 | -9.632  | 19.100 | 43.672 | 1.00 | 60.70 | O0 |
| HETATM16716 | O | HOH D 528 | -17.596 | 11.587 | 7.333  | 1.00 | 36.33 | O0 |
| HETATM16717 | O | HOH D 529 | -19.550 | 12.107 | 9.191  | 1.00 | 41.81 | O0 |
| HETATM16718 | O | HOH D 530 | -23.366 | 12.585 | 7.743  | 1.00 | 44.04 | O0 |
| HETATM16719 | O | HOH D 531 | -10.332 | 25.032 | 6.869  | 1.00 | 60.75 | O0 |
| HETATM16720 | O | HOH D 532 | -26.974 | 24.278 | 40.630 | 1.00 | 43.98 | O0 |
| HETATM16721 | O | HOH D 533 | -8.055  | 25.130 | 13.176 | 1.00 | 55.71 | O0 |
| HETATM16722 | O | HOH D 534 | -34.506 | 37.939 | 1.616  | 1.00 | 75.04 | O0 |
| HETATM16723 | O | HOH D 535 | -14.421 | 5.497  | 26.581 | 1.00 | 51.52 | O0 |
| HETATM16724 | O | HOH D 536 | -17.573 | 31.911 | 34.148 | 1.00 | 57.34 | O0 |
| HETATM16725 | O | HOH D 537 | -25.820 | 12.965 | 8.415  | 1.00 | 50.84 | O0 |
| HETATM16726 | O | HOH D 538 | -12.222 | 24.481 | 34.220 | 1.00 | 52.74 | O0 |
| HETATM16727 | O | HOH D 539 | -33.640 | 22.498 | 35.526 | 1.00 | 38.92 | O0 |
| HETATM16728 | O | HOH D 540 | -11.197 | 16.103 | 39.768 | 1.00 | 52.70 | O0 |
| HETATM16729 | O | HOH D 541 | -9.285  | 15.764 | 13.215 | 1.00 | 44.57 | O0 |
| HETATM16730 | O | HOH D 542 | -8.390  | 15.425 | 34.708 | 1.00 | 61.55 | O0 |
| HETATM16731 | O | HOH D 543 | -36.959 | 26.324 | 8.333  | 1.00 | 45.04 | O0 |
| HETATM16732 | O | HOH D 544 | -12.712 | 23.164 | 3.605  | 1.00 | 65.80 | O0 |
| HETATM16733 | O | HOH D 545 | -14.850 | 14.997 | 47.184 | 1.00 | 59.91 | O0 |
| HETATM16734 | O | HOH D 546 | -20.922 | 10.819 | 19.164 | 1.00 | 43.86 | O0 |
| HETATM16735 | O | HOH D 547 | -29.359 | 29.062 | 34.376 | 1.00 | 52.25 | O0 |
| HETATM16736 | O | HOH D 548 | -10.892 | 12.558 | 31.671 | 1.00 | 57.29 | O0 |
| HETATM16737 | O | HOH D 549 | -35.843 | 21.814 | 5.439  | 1.00 | 53.29 | O0 |
| HETATM16738 | O | HOH D 550 | -29.711 | 15.102 | 1.247  | 1.00 | 54.40 | O0 |
| HETATM16739 | O | HOH D 551 | -36.775 | 15.622 | 21.220 | 1.00 | 49.30 | O0 |
| HETATM16740 | O | HOH D 552 | -31.003 | 24.776 | 32.939 | 1.00 | 46.60 | O0 |
| HETATM16741 | O | HOH D 553 | -14.284 | 24.669 | 6.511  | 1.00 | 43.00 | O0 |
| HETATM16742 | O | HOH D 554 | -23.516 | 26.760 | 38.589 | 1.00 | 52.73 | O0 |
| HETATM16743 | O | HOH D 555 | -10.907 | 14.147 | 33.893 | 1.00 | 51.86 | O0 |
| HETATM16744 | O | HOH D 556 | -19.892 | 10.771 | 21.809 | 1.00 | 38.73 | O0 |
| HETATM16745 | O | HOH D 557 | -31.682 | 19.908 | 32.915 | 1.00 | 45.93 | O0 |
| HETATM16746 | O | HOH D 558 | -25.322 | 18.814 | 46.974 | 1.00 | 46.06 | O0 |
| HETATM16747 | O | HOH D 559 | -34.511 | 7.600  | 28.752 | 1.00 | 60.08 | O0 |
| HETATM16748 | O | HOH D 560 | -19.910 | 26.041 | 17.960 | 1.00 | 42.65 | O0 |
| HETATM16749 | O | HOH D 561 | -12.211 | 31.060 | 24.096 | 1.00 | 61.37 | O0 |
| HETATM16750 | O | HOH D 562 | -29.319 | 23.032 | 15.587 | 1.00 | 47.15 | O0 |
| HETATM16751 | O | HOH D 563 | -27.964 | 16.608 | 40.648 | 1.00 | 57.15 | O0 |
| HETATM16752 | O | HOH D 564 | -35.770 | 14.315 | 15.778 | 1.00 | 38.72 | O0 |
| HETATM16753 | O | HOH D 565 | -29.708 | 20.625 | 17.090 | 1.00 | 45.41 | O0 |
| HETATM16754 | O | HOH D 566 | -23.244 | 10.833 | 0.079  | 1.00 | 66.54 | O0 |
| HETATM16755 | O | HOH D 567 | -32.926 | 13.925 | 11.283 | 1.00 | 45.52 | O0 |
| HETATM16756 | O | HOH D 568 | -15.894 | 11.827 | 2.444  | 1.00 | 40.08 | O0 |
| HETATM16757 | O | HOH D 569 | -32.826 | 26.606 | 36.529 | 1.00 | 55.09 | O0 |
| HETATM16758 | O | HOH D 570 | -22.421 | 12.978 | 19.893 | 1.00 | 46.47 | O0 |
| HETATM16759 | O | HOH D 571 | -32.347 | 22.543 | 33.139 | 1.00 | 44.80 | O0 |
| HETATM16760 | O | HOH D 572 | -9.166  | 17.215 | 46.249 | 1.00 | 56.98 | O0 |

|             |   |           |         |         |        |      |       |    |
|-------------|---|-----------|---------|---------|--------|------|-------|----|
| HETATM16761 | O | HOH D 573 | -25.755 | 26.653  | 40.082 | 1.00 | 54.20 | O0 |
| HETATM16762 | O | HOH E 501 | -29.932 | -7.250  | 3.111  | 1.00 | 48.47 | O0 |
| HETATM16763 | O | HOH E 502 | -20.475 | -15.906 | 34.254 | 1.00 | 40.37 | O0 |
| HETATM16764 | O | HOH E 503 | -22.925 | -15.893 | 25.492 | 1.00 | 36.72 | O0 |
| HETATM16765 | O | HOH E 504 | -23.733 | -15.196 | 35.865 | 1.00 | 58.72 | O0 |
| HETATM16766 | O | HOH E 505 | -22.564 | -6.819  | 5.831  | 1.00 | 45.19 | O0 |
| HETATM16767 | O | HOH E 506 | -21.369 | 8.270   | 18.731 | 1.00 | 41.04 | O0 |
| HETATM16768 | O | HOH E 507 | -22.987 | 4.488   | 17.160 | 1.00 | 48.33 | O0 |
| HETATM16769 | O | HOH E 508 | -16.513 | -4.652  | 2.870  | 1.00 | 49.38 | O0 |
| HETATM16770 | O | HOH E 509 | -8.057  | -23.166 | 10.245 | 1.00 | 57.13 | O0 |
| HETATM16771 | O | HOH E 510 | -20.883 | -5.010  | -7.698 | 1.00 | 49.10 | O0 |
| HETATM16772 | O | HOH E 511 | -6.947  | -15.571 | 3.031  | 1.00 | 52.85 | O0 |
| HETATM16773 | O | HOH E 512 | -24.591 | -1.674  | -3.563 | 1.00 | 58.00 | O0 |
| HETATM16774 | O | HOH E 513 | -21.688 | -12.750 | 5.316  | 1.00 | 39.75 | O0 |
| HETATM16775 | O | HOH E 514 | -25.873 | -9.894  | 5.370  | 1.00 | 50.71 | O0 |
| HETATM16776 | O | HOH E 515 | -6.835  | 2.586   | 35.687 | 1.00 | 52.68 | O0 |
| HETATM16777 | O | HOH E 516 | -6.519  | -9.034  | 7.823  | 1.00 | 49.61 | O0 |
| HETATM16778 | O | HOH E 517 | -21.571 | -10.431 | 7.534  | 1.00 | 44.66 | O0 |
| HETATM16779 | O | HOH E 518 | -5.466  | -15.301 | 25.125 | 1.00 | 46.64 | O0 |
| HETATM16780 | O | HOH E 519 | -24.037 | -9.926  | 37.488 | 1.00 | 62.65 | O0 |
| HETATM16781 | O | HOH E 520 | -7.213  | -13.478 | 9.361  | 1.00 | 49.83 | O0 |
| HETATM16782 | O | HOH E 521 | -18.344 | 2.856   | 15.178 | 1.00 | 42.59 | O0 |
| HETATM16783 | O | HOH E 522 | -18.832 | -5.973  | -1.839 | 1.00 | 60.66 | O0 |
| HETATM16784 | O | HOH E 523 | -8.508  | -9.206  | 4.140  | 1.00 | 45.59 | O0 |
| HETATM16785 | O | HOH E 524 | -5.302  | -3.120  | 24.907 | 1.00 | 74.90 | O0 |
| HETATM16786 | O | HOH E 525 | -18.154 | -4.048  | 0.817  | 1.00 | 46.28 | O0 |
| HETATM16787 | O | HOH E 526 | -8.650  | -11.463 | 2.700  | 1.00 | 46.54 | O0 |
| HETATM16788 | O | HOH E 527 | -10.745 | -11.248 | 44.287 | 1.00 | 58.79 | O0 |
| HETATM16789 | O | HOH E 528 | -3.887  | 0.156   | 33.961 | 1.00 | 56.01 | O0 |
| HETATM16790 | O | HOH E 529 | -9.849  | 0.615   | 43.059 | 1.00 | 57.56 | O0 |
| HETATM16791 | O | HOH E 530 | -5.987  | 0.557   | 25.675 | 1.00 | 49.66 | O0 |
| HETATM16792 | O | HOH E 531 | -14.441 | 1.153   | 37.197 | 1.00 | 50.17 | O0 |
| HETATM16793 | O | HOH E 532 | -13.943 | -18.949 | 10.623 | 1.00 | 44.40 | O0 |
| HETATM16794 | O | HOH E 533 | -25.436 | -3.151  | 5.713  | 1.00 | 57.78 | O0 |
| HETATM16795 | O | HOH E 534 | -3.249  | -11.777 | 29.848 | 1.00 | 56.09 | O0 |
| HETATM16796 | O | HOH E 535 | -1.040  | -1.286  | 34.868 | 1.00 | 60.97 | O0 |
| HETATM16797 | O | HOH E 536 | -5.228  | 1.279   | -5.165 | 1.00 | 56.61 | O0 |
| HETATM16798 | O | HOH E 537 | -20.407 | -8.049  | 14.068 | 1.00 | 54.45 | O0 |
| HETATM16799 | O | HOH E 538 | -22.970 | -3.856  | 6.873  | 1.00 | 53.57 | O0 |
| HETATM16800 | O | HOH E 539 | -17.848 | -14.061 | -3.201 | 1.00 | 52.39 | O0 |
| HETATM16801 | O | HOH E 540 | -18.700 | -7.415  | 20.192 | 1.00 | 42.36 | O0 |
| HETATM16802 | O | HOH E 541 | -13.889 | -16.934 | 29.458 | 1.00 | 52.87 | O0 |
| HETATM16803 | O | HOH E 542 | -23.531 | -0.194  | -0.725 | 1.00 | 70.34 | O0 |
| HETATM16804 | O | HOH E 543 | -9.572  | -15.073 | 36.965 | 1.00 | 50.83 | O0 |
| HETATM16805 | O | HOH E 544 | -20.248 | -6.897  | 36.074 | 1.00 | 54.44 | O0 |
| HETATM16806 | O | HOH E 545 | -20.824 | -9.967  | 20.090 | 1.00 | 36.24 | O0 |
| HETATM16807 | O | HOH E 546 | -19.320 | -24.462 | 2.867  | 1.00 | 45.88 | O0 |
| HETATM16808 | O | HOH E 547 | -22.491 | -18.079 | 21.932 | 1.00 | 45.73 | O0 |
| HETATM16809 | O | HOH E 548 | -23.877 | -3.153  | 26.678 | 1.00 | 56.88 | O0 |
| HETATM16810 | O | HOH E 549 | -32.744 | -8.515  | 19.766 | 1.00 | 46.41 | O0 |
| HETATM16811 | O | HOH E 550 | -21.430 | -9.139  | 17.666 | 1.00 | 46.87 | O0 |
| HETATM16812 | O | HOH E 551 | -23.408 | 3.163   | 8.858  | 1.00 | 40.99 | O0 |
| HETATM16813 | O | HOH E 552 | -14.745 | -18.769 | 38.632 | 1.00 | 54.57 | O0 |
| HETATM16814 | O | HOH E 553 | -25.362 | -7.535  | -1.166 | 1.00 | 38.92 | O0 |

|             |   |           |         |         |        |      |       |    |
|-------------|---|-----------|---------|---------|--------|------|-------|----|
| HETATM16815 | O | HOH E 554 | -18.177 | 0.726   | 43.728 | 1.00 | 62.33 | O0 |
| HETATM16816 | O | HOH E 555 | -13.786 | 10.927  | 3.642  | 1.00 | 50.41 | O0 |
| HETATM16817 | O | HOH E 556 | -24.801 | 1.076   | 10.453 | 1.00 | 52.42 | O0 |
| HETATM16818 | O | HOH E 557 | -25.489 | -0.247  | 19.350 | 1.00 | 43.77 | O0 |
| HETATM16819 | O | HOH E 558 | -21.530 | -5.547  | 41.411 | 1.00 | 61.07 | O0 |
| HETATM16820 | O | HOH E 559 | -17.797 | -7.912  | 43.006 | 1.00 | 55.83 | O0 |
| HETATM16821 | O | HOH E 560 | -22.118 | -8.320  | 11.811 | 1.00 | 47.05 | O0 |
| HETATM16822 | O | HOH E 561 | -16.042 | -18.168 | 28.897 | 1.00 | 53.13 | O0 |
| HETATM16823 | O | HOH E 562 | -6.721  | -3.750  | -5.647 | 1.00 | 67.19 | O0 |
| HETATM16824 | O | HOH E 563 | -19.931 | -6.807  | 17.750 | 1.00 | 54.27 | O0 |
| HETATM16825 | O | HOH E 564 | -26.746 | -8.625  | 7.523  | 1.00 | 45.89 | O0 |

CONNECT 106515931  
CONNECT 1945 2096  
CONNECT 2096 1945  
CONNECT 2889 2899  
CONNECT 2899 2889  
CONNECT 424016027  
CONNECT 5100 5251  
CONNECT 5251 5100  
CONNECT 6044 6054  
CONNECT 6054 6044  
CONNECT 741916123  
CONNECT 8299 8450  
CONNECT 8450 8299  
CONNECT 9263 9273  
CONNECT 9273 9263  
CONNECT1061416219  
CONNECT1147411625  
CONNECT1162511474  
CONNECT1241812428  
CONNECT1242812418  
CONNECT1376916315  
CONNECT1462914780  
CONNECT1478014629  
CONNECT1557315583  
CONNECT1558315573  
CONNECT1586015861  
CONNECT15861158601586215876  
CONNECT15862158611586315896  
CONNECT15863158621586415875  
CONNECT15864158631586515872  
CONNECT158651586415866  
CONNECT15866158651586715897  
CONNECT15867158661586815898  
CONNECT1586815867158691587015871  
CONNECT1586915868158991590015901  
CONNECT1587015868159021590315904  
CONNECT158711586815872  
CONNECT15872158641587115873  
CONNECT15873158721587415905  
CONNECT15874158731587515906  
CONNECT15875158631587415876  
CONNECT1587615861158751587715878  
CONNECT1587715876158881590715908

CONNECT1587815876158791588015881  
CONNECT1587915878159091591015911  
CONNECT1588015878159121591315914  
CONNECT1588115878158821588815915  
CONNECT1588215881158831591615917  
CONNECT1588315882158841589015893  
CONNECT15884158831588515886  
CONNECT1588515884  
CONNECT15886158841588715888  
CONNECT1588715886159181591915920  
CONNECT1588815877158811588615889  
CONNECT1588915888158901592115922  
CONNECT15890158831588915891  
CONNECT1589115890158921592315924  
CONNECT1589215891158931592515926  
CONNECT1589315883158921589415895  
CONNECT1589415893159271592815929  
CONNECT1589515893  
CONNECT1589615862  
CONNECT1589715866  
CONNECT1589815867  
CONNECT1589915869  
CONNECT1590015869  
CONNECT1590115869  
CONNECT1590215870  
CONNECT1590315870  
CONNECT1590415870  
CONNECT1590515873  
CONNECT1590615874  
CONNECT1590715877  
CONNECT1590815877  
CONNECT1590915879  
CONNECT1591015879  
CONNECT1591115879  
CONNECT1591215880  
CONNECT1591315880  
CONNECT1591415880  
CONNECT1591515881  
CONNECT1591615882  
CONNECT1591715882  
CONNECT1591815887  
CONNECT1591915887  
CONNECT1592015887  
CONNECT1592115889  
CONNECT1592215889  
CONNECT1592315891  
CONNECT1592415891  
CONNECT1592515892  
CONNECT1592615892  
CONNECT1592715894  
CONNECT1592815894  
CONNECT1592915894  
CONNECT15931 1065159321594215945  
CONNECT1593215931159331593915946

CONNECT1593315932159341594015947  
CONNECT1593415933159351594115948  
CONNECT1593515934159361594215949  
CONNECT1593615935159431595015951  
CONNECT15937159381593915944  
CONNECT1593815937159521595315954  
CONNECT15939159321593715955  
CONNECT1594015933  
CONNECT1594115934  
CONNECT159421593115935  
CONNECT1594315936  
CONNECT1594415937  
CONNECT1594515931  
CONNECT1594615932  
CONNECT1594715933  
CONNECT1594815934  
CONNECT1594915935  
CONNECT1595015936  
CONNECT1595115936  
CONNECT1595215938  
CONNECT1595315938  
CONNECT1595415938  
CONNECT1595515939  
CONNECT1595615957  
CONNECT15957159561595815972  
CONNECT15958159571595915992  
CONNECT15959159581596015971  
CONNECT15960159591596115968  
CONNECT159611596015962  
CONNECT15962159611596315993  
CONNECT15963159621596415994  
CONNECT1596415963159651596615967  
CONNECT1596515964159951599615997  
CONNECT1596615964159981599916000  
CONNECT159671596415968  
CONNECT15968159601596715969  
CONNECT15969159681597016001  
CONNECT15970159691597116002  
CONNECT15971159591597015972  
CONNECT1597215957159711597315974  
CONNECT1597315972159841600316004  
CONNECT1597415972159751597615977  
CONNECT1597515974160051600616007  
CONNECT1597615974160081600916010  
CONNECT1597715974159781598416011  
CONNECT1597815977159791601216013  
CONNECT1597915978159801598615989  
CONNECT15980159791598115982  
CONNECT1598115980  
CONNECT15982159801598315984  
CONNECT1598315982160141601516016  
CONNECT1598415973159771598215985  
CONNECT1598515984159861601716018  
CONNECT15986159791598515987

CONNECT1598715986159881601916020  
CONNECT1598815987159891602116022  
CONNECT1598915979159881599015991  
CONNECT1599015989160231602416025  
CONNECT1599115989  
CONNECT1599215958  
CONNECT1599315962  
CONNECT1599415963  
CONNECT1599515965  
CONNECT1599615965  
CONNECT1599715965  
CONNECT1599815966  
CONNECT1599915966  
CONNECT1600015966  
CONNECT1600115969  
CONNECT1600215970  
CONNECT1600315973  
CONNECT1600415973  
CONNECT1600515975  
CONNECT1600615975  
CONNECT1600715975  
CONNECT1600815976  
CONNECT1600915976  
CONNECT1601015976  
CONNECT1601115977  
CONNECT1601215978  
CONNECT1601315978  
CONNECT1601415983  
CONNECT1601515983  
CONNECT1601615983  
CONNECT1601715985  
CONNECT1601815985  
CONNECT1601915987  
CONNECT1602015987  
CONNECT1602115988  
CONNECT1602215988  
CONNECT1602315990  
CONNECT1602415990  
CONNECT1602515990  
CONNECT16027 4240160281603816041  
CONNECT1602816027160291603516042  
CONNECT1602916028160301603616043  
CONNECT1603016029160311603716044  
CONNECT1603116030160321603816045  
CONNECT1603216031160391604616047  
CONNECT16033160341603516040  
CONNECT1603416033160481604916050  
CONNECT16035160281603316051  
CONNECT1603616029  
CONNECT1603716030  
CONNECT160381602716031  
CONNECT1603916032  
CONNECT1604016033  
CONNECT1604116027

CONNECT1604216028  
CONNECT1604316029  
CONNECT1604416030  
CONNECT1604516031  
CONNECT1604616032  
CONNECT1604716032  
CONNECT1604816034  
CONNECT1604916034  
CONNECT1605016034  
CONNECT1605116035  
CONNECT1605216053  
CONNECT16053160521605416068  
CONNECT16054160531605516088  
CONNECT16055160541605616067  
CONNECT16056160551605716064  
CONNECT160571605616058  
CONNECT16058160571605916089  
CONNECT16059160581606016090  
CONNECT1606016059160611606216063  
CONNECT1606116060160911609216093  
CONNECT1606216060160941609516096  
CONNECT160631606016064  
CONNECT16064160561606316065  
CONNECT16065160641606616097  
CONNECT16066160651606716098  
CONNECT16067160551606616068  
CONNECT1606816053160671606916070  
CONNECT1606916068160801609916100  
CONNECT1607016068160711607216073  
CONNECT1607116070161011610216103  
CONNECT1607216070161041610516106  
CONNECT1607316070160741608016107  
CONNECT1607416073160751610816109  
CONNECT1607516074160761608216085  
CONNECT16076160751607716078  
CONNECT1607716076  
CONNECT16078160761607916080  
CONNECT1607916078161101611116112  
CONNECT1608016069160731607816081  
CONNECT1608116080160821611316114  
CONNECT16082160751608116083  
CONNECT1608316082160841611516116  
CONNECT1608416083160851611716118  
CONNECT1608516075160841608616087  
CONNECT1608616085161191612016121  
CONNECT1608716085  
CONNECT1608816054  
CONNECT1608916058  
CONNECT1609016059  
CONNECT1609116061  
CONNECT1609216061  
CONNECT1609316061  
CONNECT1609416062  
CONNECT1609516062



CONNECT1609616062  
CONNECT1609716065  
CONNECT1609816066  
CONNECT1609916069  
CONNECT1610016069  
CONNECT1610116071  
CONNECT1610216071  
CONNECT1610316071  
CONNECT1610416072  
CONNECT1610516072  
CONNECT1610616072  
CONNECT1610716073  
CONNECT1610816074  
CONNECT1610916074  
CONNECT1611016079  
CONNECT1611116079  
CONNECT1611216079  
CONNECT1611316081  
CONNECT1611416081  
CONNECT1611516083  
CONNECT1611616083  
CONNECT1611716084  
CONNECT1611816084  
CONNECT1611916086  
CONNECT1612016086  
CONNECT1612116086  
CONNECT16123 7419161241613416137  
CONNECT1612416123161251613116138  
CONNECT1612516124161261613216139  
CONNECT1612616125161271613316140  
CONNECT1612716126161281613416141  
CONNECT1612816127161351614216143  
CONNECT16129161301613116136  
CONNECT1613016129161441614516146  
CONNECT16131161241612916147  
CONNECT1613216125  
CONNECT1613316126  
CONNECT161341612316127  
CONNECT1613516128  
CONNECT1613616129  
CONNECT1613716123  
CONNECT1613816124  
CONNECT1613916125  
CONNECT1614016126  
CONNECT1614116127  
CONNECT1614216128  
CONNECT1614316128  
CONNECT1614416130  
CONNECT1614516130  
CONNECT1614616130  
CONNECT1614716131  
CONNECT1614816149  
CONNECT16149161481615016164  
CONNECT16150161491615116184

CONNECT16151161501615216163  
CONNECT16152161511615316160  
CONNECT161531615216154  
CONNECT16154161531615516185  
CONNECT16155161541615616186  
CONNECT1615616155161571615816159  
CONNECT1615716156161871618816189  
CONNECT1615816156161901619116192  
CONNECT161591615616160  
CONNECT16160161521615916161  
CONNECT16161161601616216193  
CONNECT16162161611616316194  
CONNECT16163161511616216164  
CONNECT1616416149161631616516166  
CONNECT1616516164161761619516196  
CONNECT1616616164161671616816169  
CONNECT1616716166161971619816199  
CONNECT1616816166162001620116202  
CONNECT1616916166161701617616203  
CONNECT1617016169161711620416205  
CONNECT1617116170161721617816181  
CONNECT16172161711617316174  
CONNECT1617316172  
CONNECT16174161721617516176  
CONNECT1617516174162061620716208  
CONNECT1617616165161691617416177  
CONNECT1617716176161781620916210  
CONNECT16178161711617716179  
CONNECT1617916178161801621116212  
CONNECT1618016179161811621316214  
CONNECT1618116171161801618216183  
CONNECT1618216181162151621616217  
CONNECT1618316181  
CONNECT1618416150  
CONNECT1618516154  
CONNECT1618616155  
CONNECT1618716157  
CONNECT1618816157  
CONNECT1618916157  
CONNECT1619016158  
CONNECT1619116158  
CONNECT1619216158  
CONNECT1619316161  
CONNECT1619416162  
CONNECT1619516165  
CONNECT1619616165  
CONNECT1619716167  
CONNECT1619816167  
CONNECT1619916167  
CONNECT1620016168  
CONNECT1620116168  
CONNECT1620216168  
CONNECT1620316169  
CONNECT1620416170

CONNECT1620516170  
CONNECT1620616175  
CONNECT1620716175  
CONNECT1620816175  
CONNECT1620916177  
CONNECT1621016177  
CONNECT1621116179  
CONNECT1621216179  
CONNECT1621316180  
CONNECT1621416180  
CONNECT1621516182  
CONNECT1621616182  
CONNECT1621716182  
CONNECT1621910614162201623016233  
CONNECT1622016219162211622716234  
CONNECT1622116220162221622816235  
CONNECT1622216221162231622916236  
CONNECT1622316222162241623016237  
CONNECT1622416223162311623816239  
CONNECT16225162261622716232  
CONNECT1622616225162401624116242  
CONNECT16227162201622516243  
CONNECT1622816221  
CONNECT1622916222  
CONNECT162301621916223  
CONNECT1623116224  
CONNECT1623216225  
CONNECT1623316219  
CONNECT1623416220  
CONNECT1623516221  
CONNECT1623616222  
CONNECT1623716223  
CONNECT1623816224  
CONNECT1623916224  
CONNECT1624016226  
CONNECT1624116226  
CONNECT1624216226  
CONNECT1624316227  
CONNECT1624416245  
CONNECT16245162441624616260  
CONNECT16246162451624716280  
CONNECT16247162461624816259  
CONNECT16248162471624916256  
CONNECT162491624816250  
CONNECT16250162491625116281  
CONNECT16251162501625216282  
CONNECT1625216251162531625416255  
CONNECT1625316252162831628416285  
CONNECT1625416252162861628716288  
CONNECT162551625216256  
CONNECT16256162481625516257  
CONNECT16257162561625816289  
CONNECT16258162571625916290  
CONNECT16259162471625816260

CONNECT1626016245162591626116262  
CONNECT1626116260162721629116292  
CONNECT1626216260162631626416265  
CONNECT1626316262162931629416295  
CONNECT1626416262162961629716298  
CONNECT1626516262162661627216299  
CONNECT1626616265162671630016301  
CONNECT1626716266162681627416277  
CONNECT16268162671626916270  
CONNECT1626916268  
CONNECT16270162681627116272  
CONNECT1627116270163021630316304  
CONNECT1627216261162651627016273  
CONNECT1627316272162741630516306  
CONNECT16274162671627316275  
CONNECT1627516274162761630716308  
CONNECT1627616275162771630916310  
CONNECT1627716267162761627816279  
CONNECT1627816277163111631216313  
CONNECT1627916277  
CONNECT1628016246  
CONNECT1628116250  
CONNECT1628216251  
CONNECT1628316253  
CONNECT1628416253  
CONNECT1628516253  
CONNECT1628616254  
CONNECT1628716254  
CONNECT1628816254  
CONNECT1628916257  
CONNECT1629016258  
CONNECT1629116261  
CONNECT1629216261  
CONNECT1629316263  
CONNECT1629416263  
CONNECT1629516263  
CONNECT1629616264  
CONNECT1629716264  
CONNECT1629816264  
CONNECT1629916265  
CONNECT1630016266  
CONNECT1630116266  
CONNECT1630216271  
CONNECT1630316271  
CONNECT1630416271  
CONNECT1630516273  
CONNECT1630616273  
CONNECT1630716275  
CONNECT1630816275  
CONNECT1630916276  
CONNECT1631016276  
CONNECT1631116278  
CONNECT1631216278  
CONNECT1631316278

CONNECT1631513769163161632616329  
CONNECT1631616315163171632316330  
CONNECT1631716316163181632416331  
CONNECT1631816317163191632516332  
CONNECT1631916318163201632616333  
CONNECT1632016319163271633416335  
CONNECT16321163221632316328  
CONNECT1632216321163361633716338  
CONNECT16323163161632116339  
CONNECT1632416317  
CONNECT1632516318  
CONNECT163261631516319  
CONNECT1632716320  
CONNECT1632816321  
CONNECT1632916315  
CONNECT1633016316  
CONNECT1633116317  
CONNECT1633216318  
CONNECT1633316319  
CONNECT1633416320  
CONNECT1633516320  
CONNECT1633616322  
CONNECT1633716322  
CONNECT1633816322  
CONNECT1633916323  
MASTER 433 0 10 14 80 0 0 6 8912 5 500 85  
END
